# Supplementary material for: In vivo proteomic mapping through GFP-directed proximity-dependent biotin labelling in zebrafish
Source: eLife journal article supplement (doi:10.7554/elife.64631), 2021-02-16

Figure 1 - source file 1

Figure 1B: Streptavidin-HRP blot

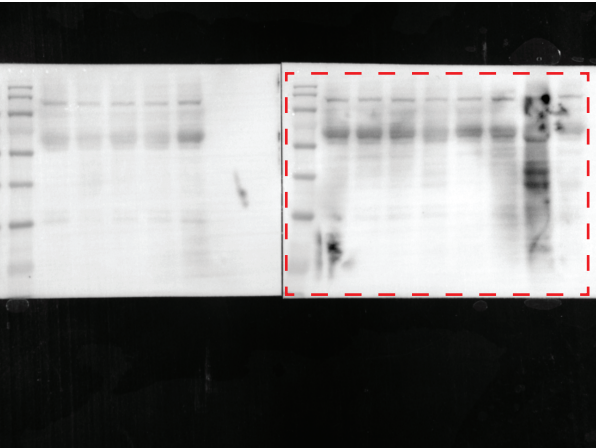

Figure 1B: Anti-Myc immunoblot

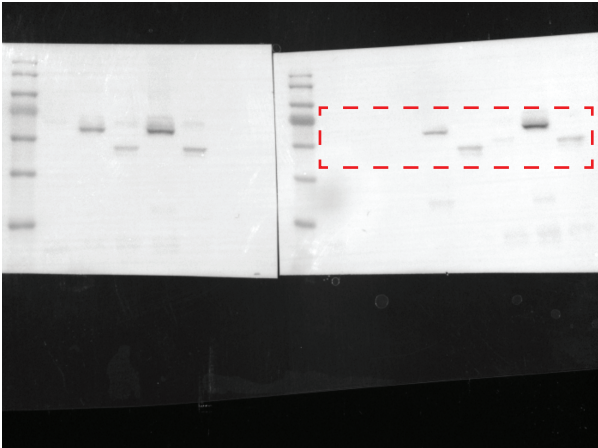

Figure 1B: Anti-Actin immunoblot

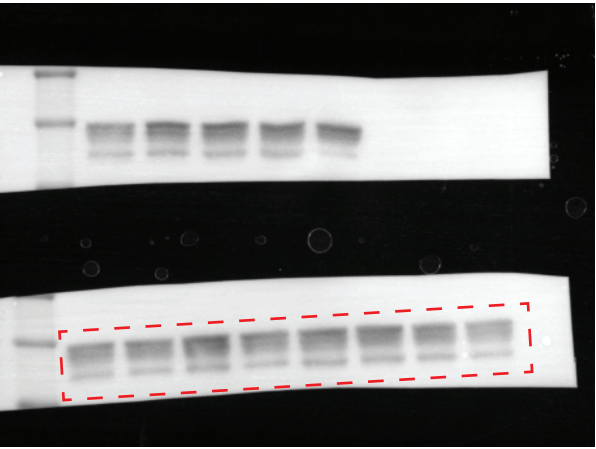

Figure 1D: Streptavidin-HRP blot

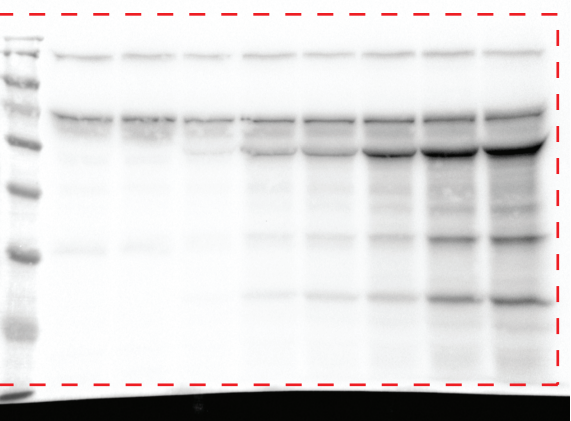

Figure 1D: Anti-Myc immunoblot

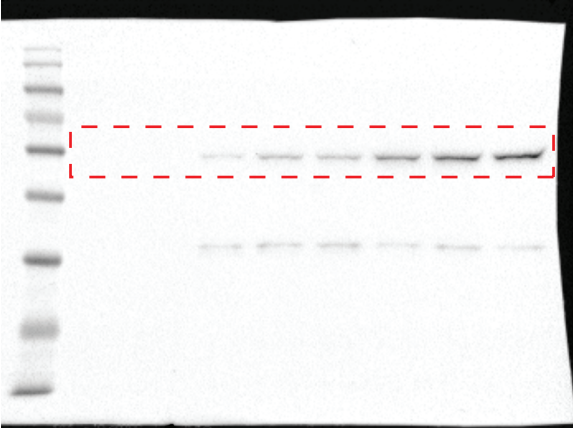

Figure 1D: Anti-Actin immunoblot

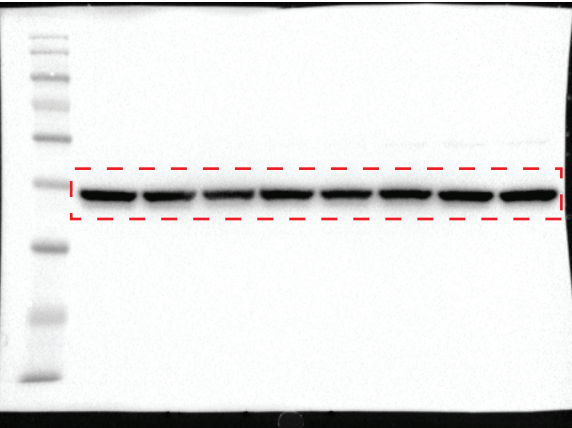

## Figure 1 - source file 1

Figure 1B: Streptavidin-HRP blot

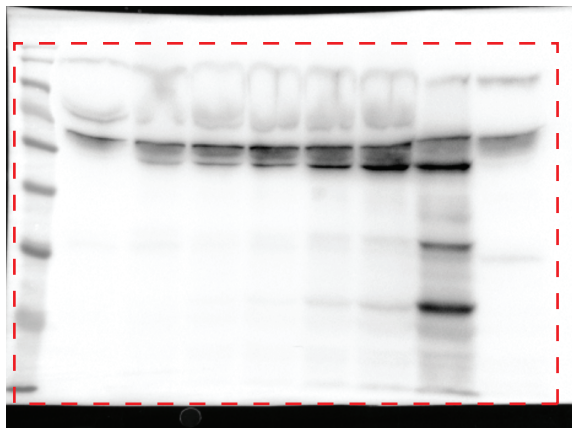

Figure 1B: Anti-Myc immunoblot

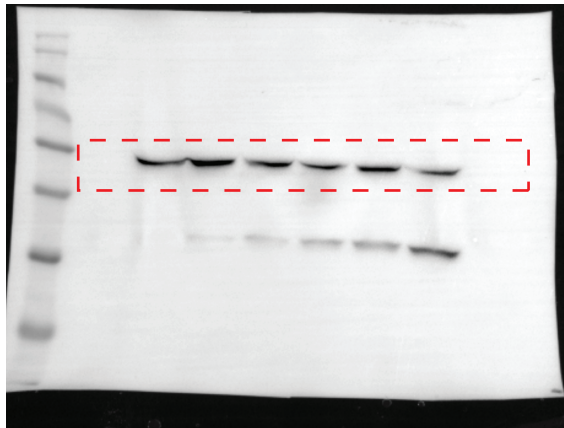

Figure 1B: Anti-Actin immunoblot (after Anti-Myc blotting)

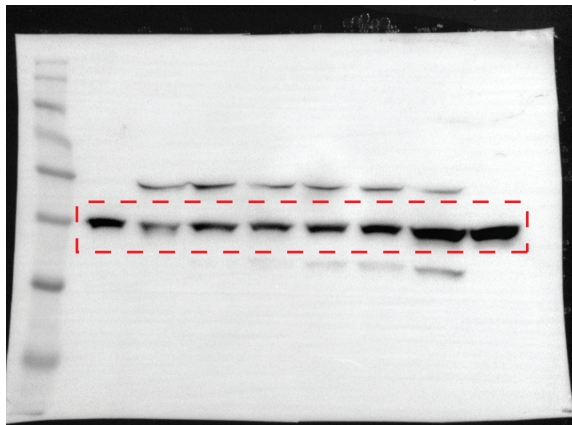

Supplement: fig1-data1 [file elife-64631-fig1-data1-v2.pdf]
