# Supplementary material for: In vivo proteomic mapping through GFP-directed proximity-dependent biotin labelling in zebrafish
Source: eLife journal article supplement (doi:10.7554/elife.64631), 2021-02-16

## Figure 2 - source file 1

Figure 2C: Streptavidin-HRP blot

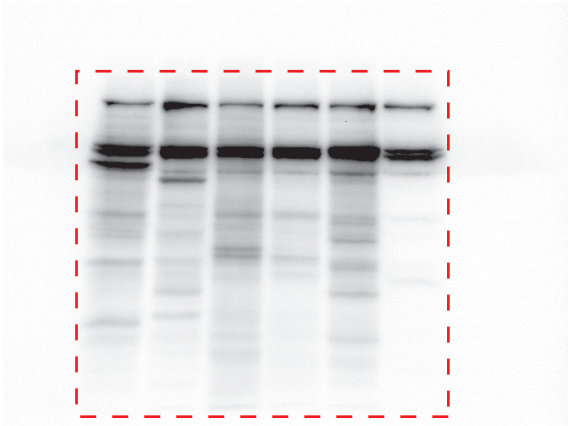

Figure 2C: Anti-Actin immunoblot

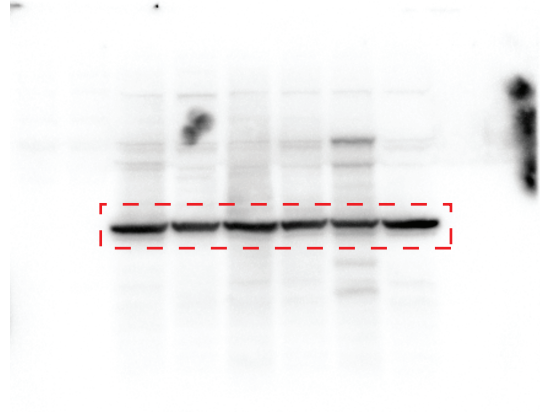

Figure 2D: Streptavidin-HRP blot

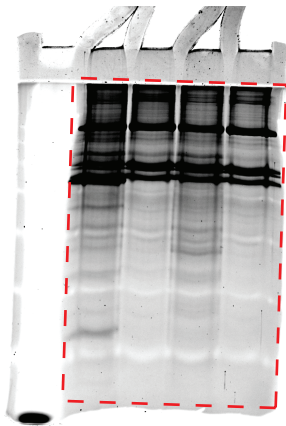

Supplement: fig2-data1 [file elife-64631-fig2-data1-v2.pdf]
