# Supplementary material for: In vivo proteomic mapping through GFP-directed proximity-dependent biotin labelling in zebrafish
Source: eLife. 2021 Feb 16;10:e64631. doi: 10.7554/eLife.64631 (PMC7906605; doi:10.7554/eLife.64631)
Supplement: Figure 5—source data 1. [file elife-64631-fig5-data1.xlsx]

## Sheet: Metadata
_RESULTS_version	5
RESULTS_SEARCH_STAT_search_begin_time_clock	01/19/2021 16:06:38
RESULTS_SEARCH_STAT_search_end_time_clock	01/20/2021 16:58:09
RESULTS_SEARCH_STAT_search_time_duration	#VALUE!
RESULTS_SEARCH_STAT_stage_signal_processing_begin_time_clock	01/19/2021 16:06:39
RESULTS_SEARCH_STAT_stage_signal_processing_end_time_clock	01/20/2021 14:58:49
RESULTS_SEARCH_STAT_stage_signal_processing_time_duration	#VALUE!
RESULTS_SEARCH_STAT_stage_waiting_begin_time_clock	01/20/2021 14:58:49
RESULTS_SEARCH_STAT_stage_waiting_end_time_clock	01/20/2021 15:00:55
RESULTS_SEARCH_STAT_stage_waiting_time_duration	2245-01-11
RESULTS_SEARCH_STAT_stage_searching_begin_time_clock	01/20/2021 15:00:55
RESULTS_SEARCH_STAT_stage_searching_end_time_clock	01/20/2021 16:53:22
RESULTS_SEARCH_STAT_stage_searching_time_duration	#VALUE!
RESULTS_SEARCH_STAT_stage_fdr_begin_time_clock	01/20/2021 16:53:24
RESULTS_SEARCH_STAT_stage_fdr_end_time_clock	01/20/2021 16:58:09
RESULTS_SEARCH_STAT_stage_fdr_time_duration	2681-08-22
RESULTS_SEARCH_STAT_task_fraglet_exe_begin_time_clock	01/20/2021 14:58:58
RESULTS_SEARCH_STAT_task_fraglet_exe_end_time_clock	01/20/2021 15:25:55
RESULTS_SEARCH_STAT_task_fraglet_exe_time_duration	1616705
RESULTS_SEARCH_STAT_task_fraglet_exe_time_cpu	#VALUE!
RESULTS_SEARCH_STAT_task_taglet_exe_begin_time_clock	01/20/2021 15:36:10
RESULTS_SEARCH_STAT_task_taglet_exe_end_time_clock	01/20/2021 16:19:16
RESULTS_SEARCH_STAT_task_taglet_exe_time_duration	2585471
RESULTS_SEARCH_STAT_task_taglet_exe_time_cpu	#VALUE!
RESULTS_SEARCH_STAT_task_progroup_begin_time_clock	01/20/2021 16:19:16
RESULTS_SEARCH_STAT_task_progroup_end_time_clock	01/20/2021 16:53:22
RESULTS_SEARCH_STAT_task_progroup_time_duration	2046174
RESULTS_SEARCH_STAT_task_progroup_time_cpu	4204-12-20
RESULTS_SEARCH_STAT_task_focusing_begin_time_clock	01/20/2021 15:25:55
RESULTS_SEARCH_STAT_task_focusing_end_time_clock	01/20/2021 15:36:10
RESULTS_SEARCH_STAT_task_focusing_time_duration	615100
RESULTS_SEARCH_STAT_task_focusing_time_cpu	503867
RESULTS_SEARCH_STAT_computer_memory	32767
RESULTS_SEARCH_STAT_computer_name	IMB-MASS02
RESULTS_SEARCH_STAT_num_proteins	150424
RESULTS_SEARCH_STAT_num_residues	75708562
RESULTS_SEARCH_STAT_number_cores	8
RESULTS_SEARCH_STAT_number_licensed_tasks	16
RESULTS_SEARCH_STAT_number_processors	8
RESULTS_SEARCH_STAT_os	Windows Server 2008 R2 Standard (6.1.7600)
RESULTS_SEARCH_1_time_cpu	182521
RESULTS_SEARCH_1_time_duration	227565
RESULTS_SEARCH_1_version	5.0.1.4874
RESULTS_SEARCH_1_xml:id	SEARCH:1:637466691961037774_0
RESULTS_SEARCH_1_PARAMETERS_chemical_data_edited	FALSE
RESULTS_SEARCH_1_PARAMETERS_do_multiprecursor_search	TRUE
RESULTS_SEARCH_1_PARAMETERS_do_reverse_search	TRUE
RESULTS_SEARCH_1_PARAMETERS_max_quant_labels	35
RESULTS_SEARCH_1_PARAMETERS_maxresults	15
RESULTS_SEARCH_1_PARAMETERS_separate_searches	FALSE
RESULTS_SEARCH_1_PARAMETERS_MSTOLERANCE_type	dalton
RESULTS_SEARCH_1_PARAMETERS_MSTOLERANCE_value	0.05
RESULTS_SEARCH_1_PARAMETERS_MSMSTOLERANCE_type	dalton
RESULTS_SEARCH_1_PARAMETERS_MSMSTOLERANCE_value	0.1
RESULTS_SEARCH_1_PARAMETERS_MS_STANDARD_DEVIATION_type	dalton
RESULTS_SEARCH_1_PARAMETERS_MS_STANDARD_DEVIATION_value	0.0011
RESULTS_SEARCH_1_PARAMETERS_MSMS_STANDARD_DEVIATION_type	dalton
RESULTS_SEARCH_1_PARAMETERS_MSMS_STANDARD_DEVIATION_value	0.01
RESULTS_SEARCH_1_PARAMETERS_FASTA_filename	C:\AB SCIEX\ProteinPilot Data\SearchDatabases\uniprot-zebrafish_with_Clover.fasta
RESULTS_SEARCH_1_PARAMETERS_AUTO_CALIBRATION_ms	TRUE
RESULTS_SEARCH_1_PARAMETERS_AUTO_CALIBRATION_msexport	FALSE
RESULTS_SEARCH_1_PARAMETERS_AUTO_CALIBRATION_msms	TRUE
RESULTS_SEARCH_1_PARAMETERS_AUTO_CALIBRATION_msmstolsdratio	2.75
RESULTS_SEARCH_1_PARAMETERS_AUTO_CALIBRATION_mstolsdratio	7
RESULTS_SEARCH_1_PARAMETERS_AUTO_CALIBRATION_squareroot	TRUE
RESULTS_SEARCH_1_PARAMETERS_AUTO_CALIBRATION_type	dalton
RESULTS_SEARCH_1_PARAMETERS_AUTO_CALIBRATION_MCP_d_s_s_f	0.0666667
RESULTS_SEARCH_1_PARAMETERS_AUTO_CALIBRATION_MCP_d_s_w_f	3
RESULTS_SEARCH_1_PARAMETERS_AUTO_CALIBRATION_MCP_m_f_r_mbc	200
RESULTS_SEARCH_1_PARAMETERS_AUTO_CALIBRATION_MCP_m_m_c	10
RESULTS_SEARCH_1_PARAMETERS_AUTO_CALIBRATION_MCP_m_m_f_s	0.25
RESULTS_SEARCH_1_PARAMETERS_AUTO_CALIBRATION_MCP_m_m_p_f	0.33
RESULTS_SEARCH_1_PARAMETERS_AUTO_CALIBRATION_MCP_m_m_p_rms_f	1
RESULTS_SEARCH_1_PARAMETERS_AUTO_CALIBRATION_MCP_m_p_t_f	1
RESULTS_SEARCH_1_PARAMETERS_AUTO_CALIBRATION_MCP_m_r_h_n_b	15
RESULTS_SEARCH_1_PARAMETERS_AUTO_CALIBRATION_MCP_m_z_n_s	99
RESULTS_SEARCH_1_PARAMETERS_AUTO_CALIBRATION_MCP_m_z_s_mn_f_r	0.0666667
RESULTS_SEARCH_1_PARAMETERS_AUTO_CALIBRATION_MCP_m_z_s_mx_f_r	0.1
RESULTS_SEARCH_1_PARAMETERS_MS_AUTO_CALIBRATION_OUT_avres	-1.89835e-10
RESULTS_SEARCH_1_PARAMETERS_MS_AUTO_CALIBRATION_OUT_c0	-0.00010977
RESULTS_SEARCH_1_PARAMETERS_MS_AUTO_CALIBRATION_OUT_c1minus1	3.65651e-06
RESULTS_SEARCH_1_PARAMETERS_MS_AUTO_CALIBRATION_OUT_c2	0
RESULTS_SEARCH_1_PARAMETERS_MS_AUTO_CALIBRATION_OUT_file	1
RESULTS_SEARCH_1_PARAMETERS_MS_AUTO_CALIBRATION_OUT_partnumber	1
RESULTS_SEARCH_1_PARAMETERS_MS_AUTO_CALIBRATION_OUT_polyorder	1
RESULTS_SEARCH_1_PARAMETERS_MS_AUTO_CALIBRATION_OUT_sample	1
RESULTS_SEARCH_1_PARAMETERS_MS_AUTO_CALIBRATION_OUT_squareroot	TRUE
RESULTS_SEARCH_1_PARAMETERS_MSMS_AUTO_CALIBRATION_OUT_avres	-8.22937e-08
RESULTS_SEARCH_1_PARAMETERS_MSMS_AUTO_CALIBRATION_OUT_c0	6.45338e-06
RESULTS_SEARCH_1_PARAMETERS_MSMS_AUTO_CALIBRATION_OUT_c1minus1	-1.71732e-06
RESULTS_SEARCH_1_PARAMETERS_MSMS_AUTO_CALIBRATION_OUT_c2	0
RESULTS_SEARCH_1_PARAMETERS_MSMS_AUTO_CALIBRATION_OUT_file	1
RESULTS_SEARCH_1_PARAMETERS_MSMS_AUTO_CALIBRATION_OUT_partnumber	1
RESULTS_SEARCH_1_PARAMETERS_MSMS_AUTO_CALIBRATION_OUT_polyorder	1
RESULTS_SEARCH_1_PARAMETERS_MSMS_AUTO_CALIBRATION_OUT_sample	1
RESULTS_SEARCH_1_PARAMETERS_MSMS_AUTO_CALIBRATION_OUT_squareroot	TRUE
RESULTS_SEARCH_1_PARAMETERS_MAX_PRECURSORS_FRAGLET	5
RESULTS_SEARCH_1_PARAMETERS_MAX_PRECURSORS_TAGLET	1
RESULTS_SEARCH_1_PARAMETERS_PRECURSORS_DR_FRAGLET	10
RESULTS_SEARCH_1_PARAMETERS_PRECURSORS_DR_TAGLET	3
RESULTS_SEARCH_1_PARAMETERS_DEFAULT_CHARGE_STATE_1_charge	2
RESULTS_SEARCH_1_PARAMETERS_DEFAULT_CHARGE_STATE_1_probability	1
RESULTS_SEARCH_1_PARAMETERS_DEFAULT_CHARGE_STATE_2_charge	3
RESULTS_SEARCH_1_PARAMETERS_DEFAULT_CHARGE_STATE_2_probability	1
RESULTS_SEARCH_1_PARAMETERS_DEFAULT_CHARGE_STATE_3_charge	4
RESULTS_SEARCH_1_PARAMETERS_DEFAULT_CHARGE_STATE_3_probability	1
RESULTS_SEARCH_1_PARAMETERS_VERSION	5.0.1.0, 4895
RESULTS_SEARCH_1_PARAMETERS_PARAGON_VERSION	5.0.1.0, 4874
RESULTS_SEARCH_1_PARAMETERS_APPLICATION	ProteinPilot(tm) Software
RESULTS_SEARCH_1_PARAMETERS_PROGROUP_alternativedispositionmaximumfoldprobabilitydrop	100
RESULTS_SEARCH_1_PARAMETERS_PROGROUP_alternativedispositionmaximumfoldscoredrop	2
RESULTS_SEARCH_1_PARAMETERS_PROGROUP_autodiscordantpeptidethreshold	0.3
RESULTS_SEARCH_1_PARAMETERS_PROGROUP_bayesconfidencecalclulation	TRUE
RESULTS_SEARCH_1_PARAMETERS_PROGROUP_calibrateconfidence	TRUE
RESULTS_SEARCH_1_PARAMETERS_PROGROUP_compresspeptides	FALSE
RESULTS_SEARCH_1_PARAMETERS_PROGROUP_confidencepercentthresholdforexcludingothersfromquant	15
RESULTS_SEARCH_1_PARAMETERS_PROGROUP_confidencepercentthresholdforincludingselfinquant	15
RESULTS_SEARCH_1_PARAMETERS_PROGROUP_donotstoremspeaklists	FALSE
RESULTS_SEARCH_1_PARAMETERS_PROGROUP_fasta	C:\AB SCIEX\ProteinPilot Data\SearchDatabases\uniprot-zebrafish_with_Clover.fasta
RESULTS_SEARCH_1_PARAMETERS_PROGROUP_featuregroupminpepconf	0.66
RESULTS_SEARCH_1_PARAMETERS_PROGROUP_featuregroupminups	0.47
RESULTS_SEARCH_1_PARAMETERS_PROGROUP_focusingintersection	4
RESULTS_SEARCH_1_PARAMETERS_PROGROUP_focusingminimummatchconfidence	0.1
RESULTS_SEARCH_1_PARAMETERS_PROGROUP_focusingminunusedprotscore	0.1
RESULTS_SEARCH_1_PARAMETERS_PROGROUP_focusingsubsetcutoff	6
RESULTS_SEARCH_1_PARAMETERS_PROGROUP_intersection	1.3
RESULTS_SEARCH_1_PARAMETERS_PROGROUP_minimummatchconfidencecutoff	0.001
RESULTS_SEARCH_1_PARAMETERS_PROGROUP_minunusedprotscore	0.0458
RESULTS_SEARCH_1_PARAMETERS_PROGROUP_subsetcutoff	2
RESULTS_SEARCH_1_PARAMETERS_PROGROUP_unusedprotscorethresholdforexcludingothersfromquant	1.3
RESULTS_SEARCH_1_PARAMETERS_PEAKLIST_count	1908-06-17
RESULTS_SEARCH_1_PARAMETERS_PEAKLIST_filenumber	1
RESULTS_SEARCH_1_PARAMETERS_PEAKLIST_original_count	3091
RESULTS_SEARCH_1_PARAMETERS_PEAKLIST_originalfilename	C:\AB SCIEX\ProteinPilot Data\Results\Albert\ZX 20200429 6600\ZX 20200429 6600 C 1A 1.wiff
RESULTS_SEARCH_1_PARAMETERS_PEAKLIST_partnumber	1
RESULTS_SEARCH_1_PARAMETERS_QUANT_TYPE_background_correction	FALSE
RESULTS_SEARCH_1_PARAMETERS_QUANT_TYPE_bias_correction	TRUE
RESULTS_SEARCH_1_PARAMETERS_QUANT_TYPE_keep_extreme_peptides_over_fraction	0
RESULTS_SEARCH_1_PARAMETERS_QUANT_TYPE_low_confidence_check	TRUE
RESULTS_SEARCH_1_PARAMETERS_QUANT_TYPE_low_intensity_check	TRUE
RESULTS_SEARCH_1_PARAMETERS_QUANT_TYPE_median_statistic	TRUE
RESULTS_SEARCH_1_PARAMETERS_QUANT_TYPE_mod_check	TRUE
RESULTS_SEARCH_1_PARAMETERS_QUANT_TYPE_quant_threshold	-1
RESULTS_SEARCH_1_PARAMETERS_QUANT_TYPE_quant_threshold_sn	9
RESULTS_SEARCH_1_PARAMETERS_QUANT_TYPE_separate_searches	FALSE
RESULTS_SEARCH_1_PARAMETERS_QUANT_TYPE_shared_msms_check	TRUE
RESULTS_SEARCH_1_PARAMETERS_PARAGON_METHOD_SETTINGS_UI_SAMPLE_TYPE	Identification
RESULTS_SEARCH_1_PARAMETERS_PARAGON_METHOD_SETTINGS_UI_CYS_ALKYLATION	Iodoacetamide w other Cys mods possible
RESULTS_SEARCH_1_PARAMETERS_PARAGON_METHOD_SETTINGS_UI_DIGESTION	Trypsin + Lys C
RESULTS_SEARCH_1_PARAMETERS_PARAGON_METHOD_SETTINGS_UI_SPECIAL_FACTOR	Gel-based ID
RESULTS_SEARCH_1_PARAMETERS_PARAGON_METHOD_SETTINGS_UI_INSTRUMENT	TripleTOF 6600
RESULTS_SEARCH_1_PARAMETERS_PARAGON_METHOD_SETTINGS_UI_SEARCH_EFFORT	Thorough
RESULTS_SEARCH_1_PARAMETERS_PARAGON_METHOD_SETTINGS_UI_USER_NAME	IMB-MASS02\massuser
RESULTS_SEARCH_1_PARAMETERS_PARAGON_METHOD_SETTINGS_UI_MACHINE_NAME	IMB-MASS02
RESULTS_SEARCH_1_PARAMETERS_PARAGON_METHOD_SETTINGS_UI_SEARCH_ID	6.37467e+17
RESULTS_SEARCH_1_PARAMETERS_PARAGON_METHOD_SETTINGS_UI_START_TIME	2021-01-19 16:06:38
RESULTS_SEARCH_1_PARAMETERS_PARAGON_METHOD_SETTINGS_UI_MIN_UNUSED_PROTSCORE	0.0458
RESULTS_SEARCH_1_PARAMETERS_PARAGON_METHOD_SETTINGS_UI_PSPEP	TRUE
RESULTS_SEARCH_2_time_cpu	205047
RESULTS_SEARCH_2_time_duration	266707
RESULTS_SEARCH_2_version	5.0.1.4874
RESULTS_SEARCH_2_xml:id	SEARCH:2:637466691961037774_0
RESULTS_SEARCH_2_PARAMETERS_chemical_data_edited	FALSE
RESULTS_SEARCH_2_PARAMETERS_do_multiprecursor_search	TRUE
RESULTS_SEARCH_2_PARAMETERS_do_reverse_search	TRUE
RESULTS_SEARCH_2_PARAMETERS_max_quant_labels	35
RESULTS_SEARCH_2_PARAMETERS_maxresults	15
RESULTS_SEARCH_2_PARAMETERS_separate_searches	FALSE
RESULTS_SEARCH_2_PARAMETERS_MSTOLERANCE_type	dalton
RESULTS_SEARCH_2_PARAMETERS_MSTOLERANCE_value	0.05
RESULTS_SEARCH_2_PARAMETERS_MSMSTOLERANCE_type	dalton
RESULTS_SEARCH_2_PARAMETERS_MSMSTOLERANCE_value	0.1
RESULTS_SEARCH_2_PARAMETERS_MS_STANDARD_DEVIATION_type	dalton
RESULTS_SEARCH_2_PARAMETERS_MS_STANDARD_DEVIATION_value	0.0011
RESULTS_SEARCH_2_PARAMETERS_MSMS_STANDARD_DEVIATION_type	dalton
RESULTS_SEARCH_2_PARAMETERS_MSMS_STANDARD_DEVIATION_value	0.01
RESULTS_SEARCH_2_PARAMETERS_FASTA_filename	C:\AB SCIEX\ProteinPilot Data\SearchDatabases\uniprot-zebrafish_with_Clover.fasta
RESULTS_SEARCH_2_PARAMETERS_AUTO_CALIBRATION_ms	TRUE
RESULTS_SEARCH_2_PARAMETERS_AUTO_CALIBRATION_msexport	FALSE
RESULTS_SEARCH_2_PARAMETERS_AUTO_CALIBRATION_msms	TRUE
RESULTS_SEARCH_2_PARAMETERS_AUTO_CALIBRATION_msmstolsdratio	2.75
RESULTS_SEARCH_2_PARAMETERS_AUTO_CALIBRATION_mstolsdratio	7
RESULTS_SEARCH_2_PARAMETERS_AUTO_CALIBRATION_squareroot	TRUE
RESULTS_SEARCH_2_PARAMETERS_AUTO_CALIBRATION_type	dalton
RESULTS_SEARCH_2_PARAMETERS_AUTO_CALIBRATION_MCP_d_s_s_f	0.0666667
RESULTS_SEARCH_2_PARAMETERS_AUTO_CALIBRATION_MCP_d_s_w_f	3
RESULTS_SEARCH_2_PARAMETERS_AUTO_CALIBRATION_MCP_m_f_r_mbc	200
RESULTS_SEARCH_2_PARAMETERS_AUTO_CALIBRATION_MCP_m_m_c	10
RESULTS_SEARCH_2_PARAMETERS_AUTO_CALIBRATION_MCP_m_m_f_s	0.25
RESULTS_SEARCH_2_PARAMETERS_AUTO_CALIBRATION_MCP_m_m_p_f	0.33
RESULTS_SEARCH_2_PARAMETERS_AUTO_CALIBRATION_MCP_m_m_p_rms_f	1
RESULTS_SEARCH_2_PARAMETERS_AUTO_CALIBRATION_MCP_m_p_t_f	1
RESULTS_SEARCH_2_PARAMETERS_AUTO_CALIBRATION_MCP_m_r_h_n_b	15
RESULTS_SEARCH_2_PARAMETERS_AUTO_CALIBRATION_MCP_m_z_n_s	99
RESULTS_SEARCH_2_PARAMETERS_AUTO_CALIBRATION_MCP_m_z_s_mn_f_r	0.0666667
RESULTS_SEARCH_2_PARAMETERS_AUTO_CALIBRATION_MCP_m_z_s_mx_f_r	0.1
RESULTS_SEARCH_2_PARAMETERS_MS_AUTO_CALIBRATION_OUT_avres	-1.89835e-10
RESULTS_SEARCH_2_PARAMETERS_MS_AUTO_CALIBRATION_OUT_c0	-0.00010977
RESULTS_SEARCH_2_PARAMETERS_MS_AUTO_CALIBRATION_OUT_c1minus1	3.65651e-06
RESULTS_SEARCH_2_PARAMETERS_MS_AUTO_CALIBRATION_OUT_c2	0
RESULTS_SEARCH_2_PARAMETERS_MS_AUTO_CALIBRATION_OUT_file	1
RESULTS_SEARCH_2_PARAMETERS_MS_AUTO_CALIBRATION_OUT_partnumber	1900-01-01
RESULTS_SEARCH_2_PARAMETERS_MS_AUTO_CALIBRATION_OUT_polyorder	1
RESULTS_SEARCH_2_PARAMETERS_MS_AUTO_CALIBRATION_OUT_sample	1
RESULTS_SEARCH_2_PARAMETERS_MS_AUTO_CALIBRATION_OUT_squareroot	TRUE
RESULTS_SEARCH_2_PARAMETERS_MSMS_AUTO_CALIBRATION_OUT_avres	-8.22937e-08
RESULTS_SEARCH_2_PARAMETERS_MSMS_AUTO_CALIBRATION_OUT_c0	6.45338e-06
RESULTS_SEARCH_2_PARAMETERS_MSMS_AUTO_CALIBRATION_OUT_c1minus1	-1.71732e-06
RESULTS_SEARCH_2_PARAMETERS_MSMS_AUTO_CALIBRATION_OUT_c2	0
RESULTS_SEARCH_2_PARAMETERS_MSMS_AUTO_CALIBRATION_OUT_file	1
RESULTS_SEARCH_2_PARAMETERS_MSMS_AUTO_CALIBRATION_OUT_partnumber	1
RESULTS_SEARCH_2_PARAMETERS_MSMS_AUTO_CALIBRATION_OUT_polyorder	1
RESULTS_SEARCH_2_PARAMETERS_MSMS_AUTO_CALIBRATION_OUT_sample	1
RESULTS_SEARCH_2_PARAMETERS_MSMS_AUTO_CALIBRATION_OUT_squareroot	TRUE
RESULTS_SEARCH_2_PARAMETERS_MAX_PRECURSORS_FRAGLET	5
RESULTS_SEARCH_2_PARAMETERS_MAX_PRECURSORS_TAGLET	1
RESULTS_SEARCH_2_PARAMETERS_PRECURSORS_DR_FRAGLET	10
RESULTS_SEARCH_2_PARAMETERS_PRECURSORS_DR_TAGLET	3
RESULTS_SEARCH_2_PARAMETERS_DEFAULT_CHARGE_STATE_1_charge	2
RESULTS_SEARCH_2_PARAMETERS_DEFAULT_CHARGE_STATE_1_probability	1
RESULTS_SEARCH_2_PARAMETERS_DEFAULT_CHARGE_STATE_2_charge	3
RESULTS_SEARCH_2_PARAMETERS_DEFAULT_CHARGE_STATE_2_probability	1
RESULTS_SEARCH_2_PARAMETERS_DEFAULT_CHARGE_STATE_3_charge	4
RESULTS_SEARCH_2_PARAMETERS_DEFAULT_CHARGE_STATE_3_probability	1
RESULTS_SEARCH_2_PARAMETERS_VERSION	5.0.1.0, 4895
RESULTS_SEARCH_2_PARAMETERS_PARAGON_VERSION	5.0.1.0, 4874
RESULTS_SEARCH_2_PARAMETERS_APPLICATION	ProteinPilot(tm) Software
RESULTS_SEARCH_2_PARAMETERS_PROGROUP_alternativedispositionmaximumfoldprobabilitydrop	100
RESULTS_SEARCH_2_PARAMETERS_PROGROUP_alternativedispositionmaximumfoldscoredrop	2
RESULTS_SEARCH_2_PARAMETERS_PROGROUP_autodiscordantpeptidethreshold	0.3
RESULTS_SEARCH_2_PARAMETERS_PROGROUP_bayesconfidencecalclulation	TRUE
RESULTS_SEARCH_2_PARAMETERS_PROGROUP_calibrateconfidence	TRUE
RESULTS_SEARCH_2_PARAMETERS_PROGROUP_compresspeptides	FALSE
RESULTS_SEARCH_2_PARAMETERS_PROGROUP_confidencepercentthresholdforexcludingothersfromquant	15
RESULTS_SEARCH_2_PARAMETERS_PROGROUP_confidencepercentthresholdforincludingselfinquant	15
RESULTS_SEARCH_2_PARAMETERS_PROGROUP_donotstoremspeaklists	FALSE
RESULTS_SEARCH_2_PARAMETERS_PROGROUP_fasta	C:\AB SCIEX\ProteinPilot Data\SearchDatabases\uniprot-zebrafish_with_Clover.fasta
RESULTS_SEARCH_2_PARAMETERS_PROGROUP_featuregroupminpepconf	0.66
RESULTS_SEARCH_2_PARAMETERS_PROGROUP_featuregroupminups	0.47
RESULTS_SEARCH_2_PARAMETERS_PROGROUP_focusingintersection	4
RESULTS_SEARCH_2_PARAMETERS_PROGROUP_focusingminimummatchconfidence	0.1
RESULTS_SEARCH_2_PARAMETERS_PROGROUP_focusingminunusedprotscore	0.1
RESULTS_SEARCH_2_PARAMETERS_PROGROUP_focusingsubsetcutoff	6
RESULTS_SEARCH_2_PARAMETERS_PROGROUP_intersection	1.3
RESULTS_SEARCH_2_PARAMETERS_PROGROUP_minimummatchconfidencecutoff	0.001
RESULTS_SEARCH_2_PARAMETERS_PROGROUP_minunusedprotscore	0.0458
RESULTS_SEARCH_2_PARAMETERS_PROGROUP_subsetcutoff	2
RESULTS_SEARCH_2_PARAMETERS_PROGROUP_unusedprotscorethresholdforexcludingothersfromquant	1.3
RESULTS_SEARCH_2_PARAMETERS_PEAKLIST_count	3091
RESULTS_SEARCH_2_PARAMETERS_PEAKLIST_filenumber	1
RESULTS_SEARCH_2_PARAMETERS_PEAKLIST_original_count	3091
RESULTS_SEARCH_2_PARAMETERS_PEAKLIST_originalfilename	C:\AB SCIEX\ProteinPilot Data\Results\Albert\ZX 20200429 6600\ZX 20200429 6600 C 1A 1.wiff
RESULTS_SEARCH_2_PARAMETERS_PEAKLIST_partnumber	1
RESULTS_SEARCH_2_PARAMETERS_QUANT_TYPE_background_correction	FALSE
RESULTS_SEARCH_2_PARAMETERS_QUANT_TYPE_bias_correction	TRUE
RESULTS_SEARCH_2_PARAMETERS_QUANT_TYPE_keep_extreme_peptides_over_fraction	0
RESULTS_SEARCH_2_PARAMETERS_QUANT_TYPE_low_confidence_check	TRUE
RESULTS_SEARCH_2_PARAMETERS_QUANT_TYPE_low_intensity_check	TRUE
RESULTS_SEARCH_2_PARAMETERS_QUANT_TYPE_median_statistic	TRUE
RESULTS_SEARCH_2_PARAMETERS_QUANT_TYPE_mod_check	TRUE
RESULTS_SEARCH_2_PARAMETERS_QUANT_TYPE_quant_threshold	-1
RESULTS_SEARCH_2_PARAMETERS_QUANT_TYPE_quant_threshold_sn	9
RESULTS_SEARCH_2_PARAMETERS_QUANT_TYPE_separate_searches	FALSE
RESULTS_SEARCH_2_PARAMETERS_QUANT_TYPE_shared_msms_check	TRUE
RESULTS_SEARCH_2_PARAMETERS_PARAGON_METHOD_SETTINGS_UI_SAMPLE_TYPE	Identification
RESULTS_SEARCH_2_PARAMETERS_PARAGON_METHOD_SETTINGS_UI_CYS_ALKYLATION	Iodoacetamide w other Cys mods possible
RESULTS_SEARCH_2_PARAMETERS_PARAGON_METHOD_SETTINGS_UI_DIGESTION	Trypsin + Lys C
RESULTS_SEARCH_2_PARAMETERS_PARAGON_METHOD_SETTINGS_UI_SPECIAL_FACTOR	Gel-based ID
RESULTS_SEARCH_2_PARAMETERS_PARAGON_METHOD_SETTINGS_UI_INSTRUMENT	TripleTOF 6600
RESULTS_SEARCH_2_PARAMETERS_PARAGON_METHOD_SETTINGS_UI_SEARCH_EFFORT	Thorough
RESULTS_SEARCH_2_PARAMETERS_PARAGON_METHOD_SETTINGS_UI_USER_NAME	IMB-MASS02\massuser
RESULTS_SEARCH_2_PARAMETERS_PARAGON_METHOD_SETTINGS_UI_MACHINE_NAME	IMB-MASS02
RESULTS_SEARCH_2_PARAMETERS_PARAGON_METHOD_SETTINGS_UI_SEARCH_ID	6.37467e+17
RESULTS_SEARCH_2_PARAMETERS_PARAGON_METHOD_SETTINGS_UI_START_TIME	2021-01-19 16:06:38
RESULTS_SEARCH_2_PARAMETERS_PARAGON_METHOD_SETTINGS_UI_MIN_UNUSED_PROTSCORE	0.0458
RESULTS_SEARCH_2_PARAMETERS_PARAGON_METHOD_SETTINGS_UI_PSPEP	TRUE
RESULTS_SEARCH_3_time_cpu	192333
RESULTS_SEARCH_3_time_duration	278314
RESULTS_SEARCH_3_version	5.0.1.4874
RESULTS_SEARCH_3_xml:id	SEARCH:1:637466691961037774_1
RESULTS_SEARCH_3_PARAMETERS_chemical_data_edited	FALSE
RESULTS_SEARCH_3_PARAMETERS_do_multiprecursor_search	TRUE
RESULTS_SEARCH_3_PARAMETERS_do_reverse_search	TRUE
RESULTS_SEARCH_3_PARAMETERS_max_quant_labels	35
RESULTS_SEARCH_3_PARAMETERS_maxresults	15
RESULTS_SEARCH_3_PARAMETERS_separate_searches	FALSE
RESULTS_SEARCH_3_PARAMETERS_MSTOLERANCE_type	dalton
RESULTS_SEARCH_3_PARAMETERS_MSTOLERANCE_value	0.05
RESULTS_SEARCH_3_PARAMETERS_MSMSTOLERANCE_type	dalton
RESULTS_SEARCH_3_PARAMETERS_MSMSTOLERANCE_value	0.1
RESULTS_SEARCH_3_PARAMETERS_MS_STANDARD_DEVIATION_type	dalton
RESULTS_SEARCH_3_PARAMETERS_MS_STANDARD_DEVIATION_value	0.0011
RESULTS_SEARCH_3_PARAMETERS_MSMS_STANDARD_DEVIATION_type	dalton
RESULTS_SEARCH_3_PARAMETERS_MSMS_STANDARD_DEVIATION_value	0.01
RESULTS_SEARCH_3_PARAMETERS_FASTA_filename	C:\AB SCIEX\ProteinPilot Data\SearchDatabases\uniprot-zebrafish_with_Clover.fasta
RESULTS_SEARCH_3_PARAMETERS_AUTO_CALIBRATION_ms	TRUE
RESULTS_SEARCH_3_PARAMETERS_AUTO_CALIBRATION_msexport	FALSE
RESULTS_SEARCH_3_PARAMETERS_AUTO_CALIBRATION_msms	TRUE
RESULTS_SEARCH_3_PARAMETERS_AUTO_CALIBRATION_msmstolsdratio	2.75
RESULTS_SEARCH_3_PARAMETERS_AUTO_CALIBRATION_mstolsdratio	7
RESULTS_SEARCH_3_PARAMETERS_AUTO_CALIBRATION_squareroot	TRUE
RESULTS_SEARCH_3_PARAMETERS_AUTO_CALIBRATION_type	dalton
RESULTS_SEARCH_3_PARAMETERS_AUTO_CALIBRATION_MCP_d_s_s_f	0.0666667
RESULTS_SEARCH_3_PARAMETERS_AUTO_CALIBRATION_MCP_d_s_w_f	3
RESULTS_SEARCH_3_PARAMETERS_AUTO_CALIBRATION_MCP_m_f_r_mbc	200
RESULTS_SEARCH_3_PARAMETERS_AUTO_CALIBRATION_MCP_m_m_c	10
RESULTS_SEARCH_3_PARAMETERS_AUTO_CALIBRATION_MCP_m_m_f_s	0.25
RESULTS_SEARCH_3_PARAMETERS_AUTO_CALIBRATION_MCP_m_m_p_f	0.33
RESULTS_SEARCH_3_PARAMETERS_AUTO_CALIBRATION_MCP_m_m_p_rms_f	1
RESULTS_SEARCH_3_PARAMETERS_AUTO_CALIBRATION_MCP_m_p_t_f	1
RESULTS_SEARCH_3_PARAMETERS_AUTO_CALIBRATION_MCP_m_r_h_n_b	15
RESULTS_SEARCH_3_PARAMETERS_AUTO_CALIBRATION_MCP_m_z_n_s	99
RESULTS_SEARCH_3_PARAMETERS_AUTO_CALIBRATION_MCP_m_z_s_mn_f_r	0.0666667
RESULTS_SEARCH_3_PARAMETERS_AUTO_CALIBRATION_MCP_m_z_s_mx_f_r	0.1
RESULTS_SEARCH_3_PARAMETERS_MS_AUTO_CALIBRATION_OUT_avres	-5.90239e-09
RESULTS_SEARCH_3_PARAMETERS_MS_AUTO_CALIBRATION_OUT_c0	1.2865e-05
RESULTS_SEARCH_3_PARAMETERS_MS_AUTO_CALIBRATION_OUT_c1minus1	-4.93742e-07
RESULTS_SEARCH_3_PARAMETERS_MS_AUTO_CALIBRATION_OUT_c2	0
RESULTS_SEARCH_3_PARAMETERS_MS_AUTO_CALIBRATION_OUT_file	1
RESULTS_SEARCH_3_PARAMETERS_MS_AUTO_CALIBRATION_OUT_partnumber	2
RESULTS_SEARCH_3_PARAMETERS_MS_AUTO_CALIBRATION_OUT_polyorder	1
RESULTS_SEARCH_3_PARAMETERS_MS_AUTO_CALIBRATION_OUT_sample	1
RESULTS_SEARCH_3_PARAMETERS_MS_AUTO_CALIBRATION_OUT_squareroot	TRUE
RESULTS_SEARCH_3_PARAMETERS_MSMS_AUTO_CALIBRATION_OUT_avres	-6.06849e-08
RESULTS_SEARCH_3_PARAMETERS_MSMS_AUTO_CALIBRATION_OUT_c0	-6.99955e-07
RESULTS_SEARCH_3_PARAMETERS_MSMS_AUTO_CALIBRATION_OUT_c1minus1	-5.7697e-07
RESULTS_SEARCH_3_PARAMETERS_MSMS_AUTO_CALIBRATION_OUT_c2	0
RESULTS_SEARCH_3_PARAMETERS_MSMS_AUTO_CALIBRATION_OUT_file	1
RESULTS_SEARCH_3_PARAMETERS_MSMS_AUTO_CALIBRATION_OUT_partnumber	2
RESULTS_SEARCH_3_PARAMETERS_MSMS_AUTO_CALIBRATION_OUT_polyorder	1
RESULTS_SEARCH_3_PARAMETERS_MSMS_AUTO_CALIBRATION_OUT_sample	1
RESULTS_SEARCH_3_PARAMETERS_MSMS_AUTO_CALIBRATION_OUT_squareroot	TRUE
RESULTS_SEARCH_3_PARAMETERS_MAX_PRECURSORS_FRAGLET	1900-01-05
RESULTS_SEARCH_3_PARAMETERS_MAX_PRECURSORS_TAGLET	1
RESULTS_SEARCH_3_PARAMETERS_PRECURSORS_DR_FRAGLET	10
RESULTS_SEARCH_3_PARAMETERS_PRECURSORS_DR_TAGLET	3
RESULTS_SEARCH_3_PARAMETERS_DEFAULT_CHARGE_STATE_1_charge	2
RESULTS_SEARCH_3_PARAMETERS_DEFAULT_CHARGE_STATE_1_probability	1
RESULTS_SEARCH_3_PARAMETERS_DEFAULT_CHARGE_STATE_2_charge	3
RESULTS_SEARCH_3_PARAMETERS_DEFAULT_CHARGE_STATE_2_probability	1
RESULTS_SEARCH_3_PARAMETERS_DEFAULT_CHARGE_STATE_3_charge	4
RESULTS_SEARCH_3_PARAMETERS_DEFAULT_CHARGE_STATE_3_probability	1
RESULTS_SEARCH_3_PARAMETERS_VERSION	5.0.1.0, 4895
RESULTS_SEARCH_3_PARAMETERS_PARAGON_VERSION	5.0.1.0, 4874
RESULTS_SEARCH_3_PARAMETERS_APPLICATION	ProteinPilot(tm) Software
RESULTS_SEARCH_3_PARAMETERS_PROGROUP_alternativedispositionmaximumfoldprobabilitydrop	100
RESULTS_SEARCH_3_PARAMETERS_PROGROUP_alternativedispositionmaximumfoldscoredrop	2
RESULTS_SEARCH_3_PARAMETERS_PROGROUP_autodiscordantpeptidethreshold	0.3
RESULTS_SEARCH_3_PARAMETERS_PROGROUP_bayesconfidencecalclulation	TRUE
RESULTS_SEARCH_3_PARAMETERS_PROGROUP_calibrateconfidence	TRUE
RESULTS_SEARCH_3_PARAMETERS_PROGROUP_compresspeptides	FALSE
RESULTS_SEARCH_3_PARAMETERS_PROGROUP_confidencepercentthresholdforexcludingothersfromquant	15
RESULTS_SEARCH_3_PARAMETERS_PROGROUP_confidencepercentthresholdforincludingselfinquant	15
RESULTS_SEARCH_3_PARAMETERS_PROGROUP_donotstoremspeaklists	FALSE
RESULTS_SEARCH_3_PARAMETERS_PROGROUP_fasta	C:\AB SCIEX\ProteinPilot Data\SearchDatabases\uniprot-zebrafish_with_Clover.fasta
RESULTS_SEARCH_3_PARAMETERS_PROGROUP_featuregroupminpepconf	0.66
RESULTS_SEARCH_3_PARAMETERS_PROGROUP_featuregroupminups	0.47
RESULTS_SEARCH_3_PARAMETERS_PROGROUP_focusingintersection	4
RESULTS_SEARCH_3_PARAMETERS_PROGROUP_focusingminimummatchconfidence	0.1
RESULTS_SEARCH_3_PARAMETERS_PROGROUP_focusingminunusedprotscore	0.1
RESULTS_SEARCH_3_PARAMETERS_PROGROUP_focusingsubsetcutoff	6
RESULTS_SEARCH_3_PARAMETERS_PROGROUP_intersection	1.3
RESULTS_SEARCH_3_PARAMETERS_PROGROUP_minimummatchconfidencecutoff	0.001
RESULTS_SEARCH_3_PARAMETERS_PROGROUP_minunusedprotscore	0.0458
RESULTS_SEARCH_3_PARAMETERS_PROGROUP_subsetcutoff	2
RESULTS_SEARCH_3_PARAMETERS_PROGROUP_unusedprotscorethresholdforexcludingothersfromquant	1900-01-01 07:12:00
RESULTS_SEARCH_3_PARAMETERS_PEAKLIST_count	3102
RESULTS_SEARCH_3_PARAMETERS_PEAKLIST_filenumber	1
RESULTS_SEARCH_3_PARAMETERS_PEAKLIST_original_count	3102
RESULTS_SEARCH_3_PARAMETERS_PEAKLIST_originalfilename	C:\AB SCIEX\ProteinPilot Data\Results\Albert\ZX 20200429 6600\ZX 20200429 6600 C 1A 1.wiff
RESULTS_SEARCH_3_PARAMETERS_PEAKLIST_partnumber	2
RESULTS_SEARCH_3_PARAMETERS_QUANT_TYPE_background_correction	FALSE
RESULTS_SEARCH_3_PARAMETERS_QUANT_TYPE_bias_correction	TRUE
RESULTS_SEARCH_3_PARAMETERS_QUANT_TYPE_keep_extreme_peptides_over_fraction	0
RESULTS_SEARCH_3_PARAMETERS_QUANT_TYPE_low_confidence_check	TRUE
RESULTS_SEARCH_3_PARAMETERS_QUANT_TYPE_low_intensity_check	TRUE
RESULTS_SEARCH_3_PARAMETERS_QUANT_TYPE_median_statistic	TRUE
RESULTS_SEARCH_3_PARAMETERS_QUANT_TYPE_mod_check	TRUE
RESULTS_SEARCH_3_PARAMETERS_QUANT_TYPE_quant_threshold	-1
RESULTS_SEARCH_3_PARAMETERS_QUANT_TYPE_quant_threshold_sn	9
RESULTS_SEARCH_3_PARAMETERS_QUANT_TYPE_separate_searches	FALSE
RESULTS_SEARCH_3_PARAMETERS_QUANT_TYPE_shared_msms_check	TRUE
RESULTS_SEARCH_3_PARAMETERS_PARAGON_METHOD_SETTINGS_UI_SAMPLE_TYPE	Identification
RESULTS_SEARCH_3_PARAMETERS_PARAGON_METHOD_SETTINGS_UI_CYS_ALKYLATION	Iodoacetamide w other Cys mods possible
RESULTS_SEARCH_3_PARAMETERS_PARAGON_METHOD_SETTINGS_UI_DIGESTION	Trypsin + Lys C
RESULTS_SEARCH_3_PARAMETERS_PARAGON_METHOD_SETTINGS_UI_SPECIAL_FACTOR	Gel-based ID
RESULTS_SEARCH_3_PARAMETERS_PARAGON_METHOD_SETTINGS_UI_INSTRUMENT	TripleTOF 6600
RESULTS_SEARCH_3_PARAMETERS_PARAGON_METHOD_SETTINGS_UI_SEARCH_EFFORT	Thorough
RESULTS_SEARCH_3_PARAMETERS_PARAGON_METHOD_SETTINGS_UI_USER_NAME	IMB-MASS02\massuser
RESULTS_SEARCH_3_PARAMETERS_PARAGON_METHOD_SETTINGS_UI_MACHINE_NAME	IMB-MASS02
RESULTS_SEARCH_3_PARAMETERS_PARAGON_METHOD_SETTINGS_UI_SEARCH_ID	6.37467e+17
RESULTS_SEARCH_3_PARAMETERS_PARAGON_METHOD_SETTINGS_UI_START_TIME	2021-01-19 16:06:38
RESULTS_SEARCH_3_PARAMETERS_PARAGON_METHOD_SETTINGS_UI_MIN_UNUSED_PROTSCORE	0.0458
RESULTS_SEARCH_3_PARAMETERS_PARAGON_METHOD_SETTINGS_UI_PSPEP	TRUE
RESULTS_SEARCH_4_time_cpu	217371
RESULTS_SEARCH_4_time_duration	247909
RESULTS_SEARCH_4_version	5.0.1.4874
RESULTS_SEARCH_4_xml:id	SEARCH:2:637466691961037774_1
RESULTS_SEARCH_4_PARAMETERS_chemical_data_edited	FALSE
RESULTS_SEARCH_4_PARAMETERS_do_multiprecursor_search	TRUE
RESULTS_SEARCH_4_PARAMETERS_do_reverse_search	TRUE
RESULTS_SEARCH_4_PARAMETERS_max_quant_labels	35
RESULTS_SEARCH_4_PARAMETERS_maxresults	15
RESULTS_SEARCH_4_PARAMETERS_separate_searches	FALSE
RESULTS_SEARCH_4_PARAMETERS_MSTOLERANCE_type	dalton
RESULTS_SEARCH_4_PARAMETERS_MSTOLERANCE_value	0.05
RESULTS_SEARCH_4_PARAMETERS_MSMSTOLERANCE_type	dalton
RESULTS_SEARCH_4_PARAMETERS_MSMSTOLERANCE_value	0.1
RESULTS_SEARCH_4_PARAMETERS_MS_STANDARD_DEVIATION_type	dalton
RESULTS_SEARCH_4_PARAMETERS_MS_STANDARD_DEVIATION_value	0.0011
RESULTS_SEARCH_4_PARAMETERS_MSMS_STANDARD_DEVIATION_type	dalton
RESULTS_SEARCH_4_PARAMETERS_MSMS_STANDARD_DEVIATION_value	0.01
RESULTS_SEARCH_4_PARAMETERS_FASTA_filename	C:\AB SCIEX\ProteinPilot Data\SearchDatabases\uniprot-zebrafish_with_Clover.fasta
RESULTS_SEARCH_4_PARAMETERS_AUTO_CALIBRATION_ms	TRUE
RESULTS_SEARCH_4_PARAMETERS_AUTO_CALIBRATION_msexport	FALSE
RESULTS_SEARCH_4_PARAMETERS_AUTO_CALIBRATION_msms	TRUE
RESULTS_SEARCH_4_PARAMETERS_AUTO_CALIBRATION_msmstolsdratio	2.75
RESULTS_SEARCH_4_PARAMETERS_AUTO_CALIBRATION_mstolsdratio	7
RESULTS_SEARCH_4_PARAMETERS_AUTO_CALIBRATION_squareroot	TRUE
RESULTS_SEARCH_4_PARAMETERS_AUTO_CALIBRATION_type	dalton
RESULTS_SEARCH_4_PARAMETERS_AUTO_CALIBRATION_MCP_d_s_s_f	0.0666667
RESULTS_SEARCH_4_PARAMETERS_AUTO_CALIBRATION_MCP_d_s_w_f	3
RESULTS_SEARCH_4_PARAMETERS_AUTO_CALIBRATION_MCP_m_f_r_mbc	200
RESULTS_SEARCH_4_PARAMETERS_AUTO_CALIBRATION_MCP_m_m_c	10
RESULTS_SEARCH_4_PARAMETERS_AUTO_CALIBRATION_MCP_m_m_f_s	0.25
RESULTS_SEARCH_4_PARAMETERS_AUTO_CALIBRATION_MCP_m_m_p_f	0.33
RESULTS_SEARCH_4_PARAMETERS_AUTO_CALIBRATION_MCP_m_m_p_rms_f	1
RESULTS_SEARCH_4_PARAMETERS_AUTO_CALIBRATION_MCP_m_p_t_f	1
RESULTS_SEARCH_4_PARAMETERS_AUTO_CALIBRATION_MCP_m_r_h_n_b	15
RESULTS_SEARCH_4_PARAMETERS_AUTO_CALIBRATION_MCP_m_z_n_s	99
RESULTS_SEARCH_4_PARAMETERS_AUTO_CALIBRATION_MCP_m_z_s_mn_f_r	0.0666667
RESULTS_SEARCH_4_PARAMETERS_AUTO_CALIBRATION_MCP_m_z_s_mx_f_r	0.1
RESULTS_SEARCH_4_PARAMETERS_MS_AUTO_CALIBRATION_OUT_avres	-5.90239e-09
RESULTS_SEARCH_4_PARAMETERS_MS_AUTO_CALIBRATION_OUT_c0	1.2865e-05
RESULTS_SEARCH_4_PARAMETERS_MS_AUTO_CALIBRATION_OUT_c1minus1	-4.93742e-07
RESULTS_SEARCH_4_PARAMETERS_MS_AUTO_CALIBRATION_OUT_c2	0
RESULTS_SEARCH_4_PARAMETERS_MS_AUTO_CALIBRATION_OUT_file	1
RESULTS_SEARCH_4_PARAMETERS_MS_AUTO_CALIBRATION_OUT_partnumber	2
RESULTS_SEARCH_4_PARAMETERS_MS_AUTO_CALIBRATION_OUT_polyorder	1
RESULTS_SEARCH_4_PARAMETERS_MS_AUTO_CALIBRATION_OUT_sample	1
RESULTS_SEARCH_4_PARAMETERS_MS_AUTO_CALIBRATION_OUT_squareroot	TRUE
RESULTS_SEARCH_4_PARAMETERS_MSMS_AUTO_CALIBRATION_OUT_avres	-6.06849e-08
RESULTS_SEARCH_4_PARAMETERS_MSMS_AUTO_CALIBRATION_OUT_c0	-6.99955e-07
RESULTS_SEARCH_4_PARAMETERS_MSMS_AUTO_CALIBRATION_OUT_c1minus1	-5.7697e-07
RESULTS_SEARCH_4_PARAMETERS_MSMS_AUTO_CALIBRATION_OUT_c2	0
RESULTS_SEARCH_4_PARAMETERS_MSMS_AUTO_CALIBRATION_OUT_file	1
RESULTS_SEARCH_4_PARAMETERS_MSMS_AUTO_CALIBRATION_OUT_partnumber	2
RESULTS_SEARCH_4_PARAMETERS_MSMS_AUTO_CALIBRATION_OUT_polyorder	1
RESULTS_SEARCH_4_PARAMETERS_MSMS_AUTO_CALIBRATION_OUT_sample	1
RESULTS_SEARCH_4_PARAMETERS_MSMS_AUTO_CALIBRATION_OUT_squareroot	TRUE
RESULTS_SEARCH_4_PARAMETERS_MAX_PRECURSORS_FRAGLET	5
RESULTS_SEARCH_4_PARAMETERS_MAX_PRECURSORS_TAGLET	1
RESULTS_SEARCH_4_PARAMETERS_PRECURSORS_DR_FRAGLET	10
RESULTS_SEARCH_4_PARAMETERS_PRECURSORS_DR_TAGLET	3
RESULTS_SEARCH_4_PARAMETERS_DEFAULT_CHARGE_STATE_1_charge	2
RESULTS_SEARCH_4_PARAMETERS_DEFAULT_CHARGE_STATE_1_probability	1
RESULTS_SEARCH_4_PARAMETERS_DEFAULT_CHARGE_STATE_2_charge	3
RESULTS_SEARCH_4_PARAMETERS_DEFAULT_CHARGE_STATE_2_probability	1
RESULTS_SEARCH_4_PARAMETERS_DEFAULT_CHARGE_STATE_3_charge	4
RESULTS_SEARCH_4_PARAMETERS_DEFAULT_CHARGE_STATE_3_probability	1
RESULTS_SEARCH_4_PARAMETERS_VERSION	5.0.1.0, 4895
RESULTS_SEARCH_4_PARAMETERS_PARAGON_VERSION	5.0.1.0, 4874
RESULTS_SEARCH_4_PARAMETERS_APPLICATION	ProteinPilot(tm) Software
RESULTS_SEARCH_4_PARAMETERS_PROGROUP_alternativedispositionmaximumfoldprobabilitydrop	100
RESULTS_SEARCH_4_PARAMETERS_PROGROUP_alternativedispositionmaximumfoldscoredrop	2
RESULTS_SEARCH_4_PARAMETERS_PROGROUP_autodiscordantpeptidethreshold	0.3
RESULTS_SEARCH_4_PARAMETERS_PROGROUP_bayesconfidencecalclulation	TRUE
RESULTS_SEARCH_4_PARAMETERS_PROGROUP_calibrateconfidence	TRUE
RESULTS_SEARCH_4_PARAMETERS_PROGROUP_compresspeptides	FALSE
RESULTS_SEARCH_4_PARAMETERS_PROGROUP_confidencepercentthresholdforexcludingothersfromquant	15
RESULTS_SEARCH_4_PARAMETERS_PROGROUP_confidencepercentthresholdforincludingselfinquant	15
RESULTS_SEARCH_4_PARAMETERS_PROGROUP_donotstoremspeaklists	FALSE
RESULTS_SEARCH_4_PARAMETERS_PROGROUP_fasta	C:\AB SCIEX\ProteinPilot Data\SearchDatabases\uniprot-zebrafish_with_Clover.fasta
RESULTS_SEARCH_4_PARAMETERS_PROGROUP_featuregroupminpepconf	0.66
RESULTS_SEARCH_4_PARAMETERS_PROGROUP_featuregroupminups	0.47
RESULTS_SEARCH_4_PARAMETERS_PROGROUP_focusingintersection	4
RESULTS_SEARCH_4_PARAMETERS_PROGROUP_focusingminimummatchconfidence	0.1
RESULTS_SEARCH_4_PARAMETERS_PROGROUP_focusingminunusedprotscore	0.1
RESULTS_SEARCH_4_PARAMETERS_PROGROUP_focusingsubsetcutoff	6
RESULTS_SEARCH_4_PARAMETERS_PROGROUP_intersection	1.3
RESULTS_SEARCH_4_PARAMETERS_PROGROUP_minimummatchconfidencecutoff	0.001
RESULTS_SEARCH_4_PARAMETERS_PROGROUP_minunusedprotscore	0.0458
RESULTS_SEARCH_4_PARAMETERS_PROGROUP_subsetcutoff	2
RESULTS_SEARCH_4_PARAMETERS_PROGROUP_unusedprotscorethresholdforexcludingothersfromquant	1.3
RESULTS_SEARCH_4_PARAMETERS_PEAKLIST_count	3102
RESULTS_SEARCH_4_PARAMETERS_PEAKLIST_filenumber	1
RESULTS_SEARCH_4_PARAMETERS_PEAKLIST_original_count	3102
RESULTS_SEARCH_4_PARAMETERS_PEAKLIST_originalfilename	C:\AB SCIEX\ProteinPilot Data\Results\Albert\ZX 20200429 6600\ZX 20200429 6600 C 1A 1.wiff
RESULTS_SEARCH_4_PARAMETERS_PEAKLIST_partnumber	2
RESULTS_SEARCH_4_PARAMETERS_QUANT_TYPE_background_correction	FALSE
RESULTS_SEARCH_4_PARAMETERS_QUANT_TYPE_bias_correction	TRUE
RESULTS_SEARCH_4_PARAMETERS_QUANT_TYPE_keep_extreme_peptides_over_fraction	0
RESULTS_SEARCH_4_PARAMETERS_QUANT_TYPE_low_confidence_check	TRUE
RESULTS_SEARCH_4_PARAMETERS_QUANT_TYPE_low_intensity_check	TRUE
RESULTS_SEARCH_4_PARAMETERS_QUANT_TYPE_median_statistic	TRUE
RESULTS_SEARCH_4_PARAMETERS_QUANT_TYPE_mod_check	TRUE
RESULTS_SEARCH_4_PARAMETERS_QUANT_TYPE_quant_threshold	-1
RESULTS_SEARCH_4_PARAMETERS_QUANT_TYPE_quant_threshold_sn	9
RESULTS_SEARCH_4_PARAMETERS_QUANT_TYPE_separate_searches	FALSE
RESULTS_SEARCH_4_PARAMETERS_QUANT_TYPE_shared_msms_check	TRUE
RESULTS_SEARCH_4_PARAMETERS_PARAGON_METHOD_SETTINGS_UI_SAMPLE_TYPE	Identification
RESULTS_SEARCH_4_PARAMETERS_PARAGON_METHOD_SETTINGS_UI_CYS_ALKYLATION	Iodoacetamide w other Cys mods possible
RESULTS_SEARCH_4_PARAMETERS_PARAGON_METHOD_SETTINGS_UI_DIGESTION	Trypsin + Lys C
RESULTS_SEARCH_4_PARAMETERS_PARAGON_METHOD_SETTINGS_UI_SPECIAL_FACTOR	Gel-based ID
RESULTS_SEARCH_4_PARAMETERS_PARAGON_METHOD_SETTINGS_UI_INSTRUMENT	TripleTOF 6600
RESULTS_SEARCH_4_PARAMETERS_PARAGON_METHOD_SETTINGS_UI_SEARCH_EFFORT	Thorough
RESULTS_SEARCH_4_PARAMETERS_PARAGON_METHOD_SETTINGS_UI_USER_NAME	IMB-MASS02\massuser
RESULTS_SEARCH_4_PARAMETERS_PARAGON_METHOD_SETTINGS_UI_MACHINE_NAME	IMB-MASS02
RESULTS_SEARCH_4_PARAMETERS_PARAGON_METHOD_SETTINGS_UI_SEARCH_ID	6.37467e+17
RESULTS_SEARCH_4_PARAMETERS_PARAGON_METHOD_SETTINGS_UI_START_TIME	2021-01-19 16:06:38
RESULTS_SEARCH_4_PARAMETERS_PARAGON_METHOD_SETTINGS_UI_MIN_UNUSED_PROTSCORE	0.0458
RESULTS_SEARCH_4_PARAMETERS_PARAGON_METHOD_SETTINGS_UI_PSPEP	TRUE
RESULTS_SEARCH_5_time_cpu	248447
RESULTS_SEARCH_5_time_duration	2690-03-09
RESULTS_SEARCH_5_version	5.0.1.4874
RESULTS_SEARCH_5_xml:id	SEARCH:1:637466691961037774_2
RESULTS_SEARCH_5_PARAMETERS_chemical_data_edited	FALSE
RESULTS_SEARCH_5_PARAMETERS_do_multiprecursor_search	TRUE
RESULTS_SEARCH_5_PARAMETERS_do_reverse_search	TRUE
RESULTS_SEARCH_5_PARAMETERS_max_quant_labels	35
RESULTS_SEARCH_5_PARAMETERS_maxresults	15
RESULTS_SEARCH_5_PARAMETERS_separate_searches	FALSE
RESULTS_SEARCH_5_PARAMETERS_MSTOLERANCE_type	dalton
RESULTS_SEARCH_5_PARAMETERS_MSTOLERANCE_value	0.05
RESULTS_SEARCH_5_PARAMETERS_MSMSTOLERANCE_type	dalton
RESULTS_SEARCH_5_PARAMETERS_MSMSTOLERANCE_value	0.1
RESULTS_SEARCH_5_PARAMETERS_MS_STANDARD_DEVIATION_type	dalton
RESULTS_SEARCH_5_PARAMETERS_MS_STANDARD_DEVIATION_value	0.0011
RESULTS_SEARCH_5_PARAMETERS_MSMS_STANDARD_DEVIATION_type	dalton
RESULTS_SEARCH_5_PARAMETERS_MSMS_STANDARD_DEVIATION_value	0.01
RESULTS_SEARCH_5_PARAMETERS_FASTA_filename	C:\AB SCIEX\ProteinPilot Data\SearchDatabases\uniprot-zebrafish_with_Clover.fasta
RESULTS_SEARCH_5_PARAMETERS_AUTO_CALIBRATION_ms	TRUE
RESULTS_SEARCH_5_PARAMETERS_AUTO_CALIBRATION_msexport	FALSE
RESULTS_SEARCH_5_PARAMETERS_AUTO_CALIBRATION_msms	TRUE
RESULTS_SEARCH_5_PARAMETERS_AUTO_CALIBRATION_msmstolsdratio	2.75
RESULTS_SEARCH_5_PARAMETERS_AUTO_CALIBRATION_mstolsdratio	7
RESULTS_SEARCH_5_PARAMETERS_AUTO_CALIBRATION_squareroot	TRUE
RESULTS_SEARCH_5_PARAMETERS_AUTO_CALIBRATION_type	dalton
RESULTS_SEARCH_5_PARAMETERS_AUTO_CALIBRATION_MCP_d_s_s_f	0.0666667
RESULTS_SEARCH_5_PARAMETERS_AUTO_CALIBRATION_MCP_d_s_w_f	3
RESULTS_SEARCH_5_PARAMETERS_AUTO_CALIBRATION_MCP_m_f_r_mbc	200
RESULTS_SEARCH_5_PARAMETERS_AUTO_CALIBRATION_MCP_m_m_c	10
RESULTS_SEARCH_5_PARAMETERS_AUTO_CALIBRATION_MCP_m_m_f_s	0.25
RESULTS_SEARCH_5_PARAMETERS_AUTO_CALIBRATION_MCP_m_m_p_f	0.33
RESULTS_SEARCH_5_PARAMETERS_AUTO_CALIBRATION_MCP_m_m_p_rms_f	1
RESULTS_SEARCH_5_PARAMETERS_AUTO_CALIBRATION_MCP_m_p_t_f	1
RESULTS_SEARCH_5_PARAMETERS_AUTO_CALIBRATION_MCP_m_r_h_n_b	15
RESULTS_SEARCH_5_PARAMETERS_AUTO_CALIBRATION_MCP_m_z_n_s	99
RESULTS_SEARCH_5_PARAMETERS_AUTO_CALIBRATION_MCP_m_z_s_mn_f_r	0.0666667
RESULTS_SEARCH_5_PARAMETERS_AUTO_CALIBRATION_MCP_m_z_s_mx_f_r	0.1
RESULTS_SEARCH_5_PARAMETERS_MS_AUTO_CALIBRATION_OUT_avres	-9.85561e-11
RESULTS_SEARCH_5_PARAMETERS_MS_AUTO_CALIBRATION_OUT_c0	-9.28556e-05
RESULTS_SEARCH_5_PARAMETERS_MS_AUTO_CALIBRATION_OUT_c1minus1	3.79702e-06
RESULTS_SEARCH_5_PARAMETERS_MS_AUTO_CALIBRATION_OUT_c2	0
RESULTS_SEARCH_5_PARAMETERS_MS_AUTO_CALIBRATION_OUT_file	1
RESULTS_SEARCH_5_PARAMETERS_MS_AUTO_CALIBRATION_OUT_partnumber	3
RESULTS_SEARCH_5_PARAMETERS_MS_AUTO_CALIBRATION_OUT_polyorder	1
RESULTS_SEARCH_5_PARAMETERS_MS_AUTO_CALIBRATION_OUT_sample	1
RESULTS_SEARCH_5_PARAMETERS_MS_AUTO_CALIBRATION_OUT_squareroot	TRUE
RESULTS_SEARCH_5_PARAMETERS_MSMS_AUTO_CALIBRATION_OUT_avres	-5.43756e-08
RESULTS_SEARCH_5_PARAMETERS_MSMS_AUTO_CALIBRATION_OUT_c0	6.446e-06
RESULTS_SEARCH_5_PARAMETERS_MSMS_AUTO_CALIBRATION_OUT_c1minus1	-1.04649e-06
RESULTS_SEARCH_5_PARAMETERS_MSMS_AUTO_CALIBRATION_OUT_c2	0
RESULTS_SEARCH_5_PARAMETERS_MSMS_AUTO_CALIBRATION_OUT_file	1
RESULTS_SEARCH_5_PARAMETERS_MSMS_AUTO_CALIBRATION_OUT_partnumber	3
RESULTS_SEARCH_5_PARAMETERS_MSMS_AUTO_CALIBRATION_OUT_polyorder	1
RESULTS_SEARCH_5_PARAMETERS_MSMS_AUTO_CALIBRATION_OUT_sample	1
RESULTS_SEARCH_5_PARAMETERS_MSMS_AUTO_CALIBRATION_OUT_squareroot	TRUE
RESULTS_SEARCH_5_PARAMETERS_MAX_PRECURSORS_FRAGLET	5
RESULTS_SEARCH_5_PARAMETERS_MAX_PRECURSORS_TAGLET	1
RESULTS_SEARCH_5_PARAMETERS_PRECURSORS_DR_FRAGLET	10
RESULTS_SEARCH_5_PARAMETERS_PRECURSORS_DR_TAGLET	3
RESULTS_SEARCH_5_PARAMETERS_DEFAULT_CHARGE_STATE_1_charge	2
RESULTS_SEARCH_5_PARAMETERS_DEFAULT_CHARGE_STATE_1_probability	1
RESULTS_SEARCH_5_PARAMETERS_DEFAULT_CHARGE_STATE_2_charge	3
RESULTS_SEARCH_5_PARAMETERS_DEFAULT_CHARGE_STATE_2_probability	1
RESULTS_SEARCH_5_PARAMETERS_DEFAULT_CHARGE_STATE_3_charge	4
RESULTS_SEARCH_5_PARAMETERS_DEFAULT_CHARGE_STATE_3_probability	1
RESULTS_SEARCH_5_PARAMETERS_VERSION	5.0.1.0, 4895
RESULTS_SEARCH_5_PARAMETERS_PARAGON_VERSION	5.0.1.0, 4874
RESULTS_SEARCH_5_PARAMETERS_APPLICATION	ProteinPilot(tm) Software
RESULTS_SEARCH_5_PARAMETERS_PROGROUP_alternativedispositionmaximumfoldprobabilitydrop	100
RESULTS_SEARCH_5_PARAMETERS_PROGROUP_alternativedispositionmaximumfoldscoredrop	2
RESULTS_SEARCH_5_PARAMETERS_PROGROUP_autodiscordantpeptidethreshold	0.3
RESULTS_SEARCH_5_PARAMETERS_PROGROUP_bayesconfidencecalclulation	TRUE
RESULTS_SEARCH_5_PARAMETERS_PROGROUP_calibrateconfidence	TRUE
RESULTS_SEARCH_5_PARAMETERS_PROGROUP_compresspeptides	FALSE
RESULTS_SEARCH_5_PARAMETERS_PROGROUP_confidencepercentthresholdforexcludingothersfromquant	15
RESULTS_SEARCH_5_PARAMETERS_PROGROUP_confidencepercentthresholdforincludingselfinquant	15
RESULTS_SEARCH_5_PARAMETERS_PROGROUP_donotstoremspeaklists	FALSE
RESULTS_SEARCH_5_PARAMETERS_PROGROUP_fasta	C:\AB SCIEX\ProteinPilot Data\SearchDatabases\uniprot-zebrafish_with_Clover.fasta
RESULTS_SEARCH_5_PARAMETERS_PROGROUP_featuregroupminpepconf	0.66
RESULTS_SEARCH_5_PARAMETERS_PROGROUP_featuregroupminups	0.47
RESULTS_SEARCH_5_PARAMETERS_PROGROUP_focusingintersection	4
RESULTS_SEARCH_5_PARAMETERS_PROGROUP_focusingminimummatchconfidence	0.1
RESULTS_SEARCH_5_PARAMETERS_PROGROUP_focusingminunusedprotscore	0.1
RESULTS_SEARCH_5_PARAMETERS_PROGROUP_focusingsubsetcutoff	6
RESULTS_SEARCH_5_PARAMETERS_PROGROUP_intersection	1.3
RESULTS_SEARCH_5_PARAMETERS_PROGROUP_minimummatchconfidencecutoff	0.001
RESULTS_SEARCH_5_PARAMETERS_PROGROUP_minunusedprotscore	0.0458
RESULTS_SEARCH_5_PARAMETERS_PROGROUP_subsetcutoff	2
RESULTS_SEARCH_5_PARAMETERS_PROGROUP_unusedprotscorethresholdforexcludingothersfromquant	1.3
RESULTS_SEARCH_5_PARAMETERS_PEAKLIST_count	3088
RESULTS_SEARCH_5_PARAMETERS_PEAKLIST_filenumber	1
RESULTS_SEARCH_5_PARAMETERS_PEAKLIST_original_count	3088
RESULTS_SEARCH_5_PARAMETERS_PEAKLIST_originalfilename	C:\AB SCIEX\ProteinPilot Data\Results\Albert\ZX 20200429 6600\ZX 20200429 6600 C 1A 1.wiff
RESULTS_SEARCH_5_PARAMETERS_PEAKLIST_partnumber	3
RESULTS_SEARCH_5_PARAMETERS_QUANT_TYPE_background_correction	FALSE
RESULTS_SEARCH_5_PARAMETERS_QUANT_TYPE_bias_correction	TRUE
RESULTS_SEARCH_5_PARAMETERS_QUANT_TYPE_keep_extreme_peptides_over_fraction	0
RESULTS_SEARCH_5_PARAMETERS_QUANT_TYPE_low_confidence_check	TRUE
RESULTS_SEARCH_5_PARAMETERS_QUANT_TYPE_low_intensity_check	TRUE
RESULTS_SEARCH_5_PARAMETERS_QUANT_TYPE_median_statistic	TRUE
RESULTS_SEARCH_5_PARAMETERS_QUANT_TYPE_mod_check	TRUE
RESULTS_SEARCH_5_PARAMETERS_QUANT_TYPE_quant_threshold	-1
RESULTS_SEARCH_5_PARAMETERS_QUANT_TYPE_quant_threshold_sn	9
RESULTS_SEARCH_5_PARAMETERS_QUANT_TYPE_separate_searches	FALSE
RESULTS_SEARCH_5_PARAMETERS_QUANT_TYPE_shared_msms_check	TRUE
RESULTS_SEARCH_5_PARAMETERS_PARAGON_METHOD_SETTINGS_UI_SAMPLE_TYPE	Identification
RESULTS_SEARCH_5_PARAMETERS_PARAGON_METHOD_SETTINGS_UI_CYS_ALKYLATION	Iodoacetamide w other Cys mods possible
RESULTS_SEARCH_5_PARAMETERS_PARAGON_METHOD_SETTINGS_UI_DIGESTION	Trypsin + Lys C
RESULTS_SEARCH_5_PARAMETERS_PARAGON_METHOD_SETTINGS_UI_SPECIAL_FACTOR	Gel-based ID
RESULTS_SEARCH_5_PARAMETERS_PARAGON_METHOD_SETTINGS_UI_INSTRUMENT	TripleTOF 6600
RESULTS_SEARCH_5_PARAMETERS_PARAGON_METHOD_SETTINGS_UI_SEARCH_EFFORT	Thorough
RESULTS_SEARCH_5_PARAMETERS_PARAGON_METHOD_SETTINGS_UI_USER_NAME	IMB-MASS02\massuser
RESULTS_SEARCH_5_PARAMETERS_PARAGON_METHOD_SETTINGS_UI_MACHINE_NAME	IMB-MASS02
RESULTS_SEARCH_5_PARAMETERS_PARAGON_METHOD_SETTINGS_UI_SEARCH_ID	6.37467e+17
RESULTS_SEARCH_5_PARAMETERS_PARAGON_METHOD_SETTINGS_UI_START_TIME	2021-01-19 16:06:38
RESULTS_SEARCH_5_PARAMETERS_PARAGON_METHOD_SETTINGS_UI_MIN_UNUSED_PROTSCORE	0.0458
RESULTS_SEARCH_5_PARAMETERS_PARAGON_METHOD_SETTINGS_UI_PSPEP	TRUE
RESULTS_SEARCH_6_time_cpu	302579
RESULTS_SEARCH_6_time_duration	329047
RESULTS_SEARCH_6_version	5.0.1.4874
RESULTS_SEARCH_6_xml:id	SEARCH:2:637466691961037774_2
RESULTS_SEARCH_6_PARAMETERS_chemical_data_edited	FALSE
RESULTS_SEARCH_6_PARAMETERS_do_multiprecursor_search	TRUE
RESULTS_SEARCH_6_PARAMETERS_do_reverse_search	TRUE
RESULTS_SEARCH_6_PARAMETERS_max_quant_labels	35
RESULTS_SEARCH_6_PARAMETERS_maxresults	15
RESULTS_SEARCH_6_PARAMETERS_separate_searches	FALSE
RESULTS_SEARCH_6_PARAMETERS_MSTOLERANCE_type	dalton
RESULTS_SEARCH_6_PARAMETERS_MSTOLERANCE_value	0.05
RESULTS_SEARCH_6_PARAMETERS_MSMSTOLERANCE_type	dalton
RESULTS_SEARCH_6_PARAMETERS_MSMSTOLERANCE_value	0.1
RESULTS_SEARCH_6_PARAMETERS_MS_STANDARD_DEVIATION_type	dalton
RESULTS_SEARCH_6_PARAMETERS_MS_STANDARD_DEVIATION_value	0.0011
RESULTS_SEARCH_6_PARAMETERS_MSMS_STANDARD_DEVIATION_type	dalton
RESULTS_SEARCH_6_PARAMETERS_MSMS_STANDARD_DEVIATION_value	0.01
RESULTS_SEARCH_6_PARAMETERS_FASTA_filename	C:\AB SCIEX\ProteinPilot Data\SearchDatabases\uniprot-zebrafish_with_Clover.fasta
RESULTS_SEARCH_6_PARAMETERS_AUTO_CALIBRATION_ms	TRUE
RESULTS_SEARCH_6_PARAMETERS_AUTO_CALIBRATION_msexport	FALSE
RESULTS_SEARCH_6_PARAMETERS_AUTO_CALIBRATION_msms	TRUE
RESULTS_SEARCH_6_PARAMETERS_AUTO_CALIBRATION_msmstolsdratio	2.75
RESULTS_SEARCH_6_PARAMETERS_AUTO_CALIBRATION_mstolsdratio	7
RESULTS_SEARCH_6_PARAMETERS_AUTO_CALIBRATION_squareroot	TRUE
RESULTS_SEARCH_6_PARAMETERS_AUTO_CALIBRATION_type	dalton
RESULTS_SEARCH_6_PARAMETERS_AUTO_CALIBRATION_MCP_d_s_s_f	0.0666667
RESULTS_SEARCH_6_PARAMETERS_AUTO_CALIBRATION_MCP_d_s_w_f	3
RESULTS_SEARCH_6_PARAMETERS_AUTO_CALIBRATION_MCP_m_f_r_mbc	200
RESULTS_SEARCH_6_PARAMETERS_AUTO_CALIBRATION_MCP_m_m_c	10
RESULTS_SEARCH_6_PARAMETERS_AUTO_CALIBRATION_MCP_m_m_f_s	0.25
RESULTS_SEARCH_6_PARAMETERS_AUTO_CALIBRATION_MCP_m_m_p_f	0.33
RESULTS_SEARCH_6_PARAMETERS_AUTO_CALIBRATION_MCP_m_m_p_rms_f	1
RESULTS_SEARCH_6_PARAMETERS_AUTO_CALIBRATION_MCP_m_p_t_f	1
RESULTS_SEARCH_6_PARAMETERS_AUTO_CALIBRATION_MCP_m_r_h_n_b	15
RESULTS_SEARCH_6_PARAMETERS_AUTO_CALIBRATION_MCP_m_z_n_s	99
RESULTS_SEARCH_6_PARAMETERS_AUTO_CALIBRATION_MCP_m_z_s_mn_f_r	0.0666667
RESULTS_SEARCH_6_PARAMETERS_AUTO_CALIBRATION_MCP_m_z_s_mx_f_r	0.1
RESULTS_SEARCH_6_PARAMETERS_MS_AUTO_CALIBRATION_OUT_avres	-9.85561e-11
RESULTS_SEARCH_6_PARAMETERS_MS_AUTO_CALIBRATION_OUT_c0	-9.28556e-05
RESULTS_SEARCH_6_PARAMETERS_MS_AUTO_CALIBRATION_OUT_c1minus1	3.79702e-06
RESULTS_SEARCH_6_PARAMETERS_MS_AUTO_CALIBRATION_OUT_c2	0
RESULTS_SEARCH_6_PARAMETERS_MS_AUTO_CALIBRATION_OUT_file	1
RESULTS_SEARCH_6_PARAMETERS_MS_AUTO_CALIBRATION_OUT_partnumber	3
RESULTS_SEARCH_6_PARAMETERS_MS_AUTO_CALIBRATION_OUT_polyorder	1
RESULTS_SEARCH_6_PARAMETERS_MS_AUTO_CALIBRATION_OUT_sample	1
RESULTS_SEARCH_6_PARAMETERS_MS_AUTO_CALIBRATION_OUT_squareroot	TRUE
RESULTS_SEARCH_6_PARAMETERS_MSMS_AUTO_CALIBRATION_OUT_avres	-5.43756e-08
RESULTS_SEARCH_6_PARAMETERS_MSMS_AUTO_CALIBRATION_OUT_c0	6.446e-06
RESULTS_SEARCH_6_PARAMETERS_MSMS_AUTO_CALIBRATION_OUT_c1minus1	-1.04649e-06
RESULTS_SEARCH_6_PARAMETERS_MSMS_AUTO_CALIBRATION_OUT_c2	0
RESULTS_SEARCH_6_PARAMETERS_MSMS_AUTO_CALIBRATION_OUT_file	1
RESULTS_SEARCH_6_PARAMETERS_MSMS_AUTO_CALIBRATION_OUT_partnumber	3
RESULTS_SEARCH_6_PARAMETERS_MSMS_AUTO_CALIBRATION_OUT_polyorder	1
RESULTS_SEARCH_6_PARAMETERS_MSMS_AUTO_CALIBRATION_OUT_sample	1
RESULTS_SEARCH_6_PARAMETERS_MSMS_AUTO_CALIBRATION_OUT_squareroot	TRUE
RESULTS_SEARCH_6_PARAMETERS_MAX_PRECURSORS_FRAGLET	5
RESULTS_SEARCH_6_PARAMETERS_MAX_PRECURSORS_TAGLET	1
RESULTS_SEARCH_6_PARAMETERS_PRECURSORS_DR_FRAGLET	10
RESULTS_SEARCH_6_PARAMETERS_PRECURSORS_DR_TAGLET	3
RESULTS_SEARCH_6_PARAMETERS_DEFAULT_CHARGE_STATE_1_charge	2
RESULTS_SEARCH_6_PARAMETERS_DEFAULT_CHARGE_STATE_1_probability	1
RESULTS_SEARCH_6_PARAMETERS_DEFAULT_CHARGE_STATE_2_charge	3
RESULTS_SEARCH_6_PARAMETERS_DEFAULT_CHARGE_STATE_2_probability	1900-01-01
RESULTS_SEARCH_6_PARAMETERS_DEFAULT_CHARGE_STATE_3_charge	4
RESULTS_SEARCH_6_PARAMETERS_DEFAULT_CHARGE_STATE_3_probability	1
RESULTS_SEARCH_6_PARAMETERS_VERSION	5.0.1.0, 4895
RESULTS_SEARCH_6_PARAMETERS_PARAGON_VERSION	5.0.1.0, 4874
RESULTS_SEARCH_6_PARAMETERS_APPLICATION	ProteinPilot(tm) Software
RESULTS_SEARCH_6_PARAMETERS_PROGROUP_alternativedispositionmaximumfoldprobabilitydrop	100
RESULTS_SEARCH_6_PARAMETERS_PROGROUP_alternativedispositionmaximumfoldscoredrop	2
RESULTS_SEARCH_6_PARAMETERS_PROGROUP_autodiscordantpeptidethreshold	0.3
RESULTS_SEARCH_6_PARAMETERS_PROGROUP_bayesconfidencecalclulation	TRUE
RESULTS_SEARCH_6_PARAMETERS_PROGROUP_calibrateconfidence	TRUE
RESULTS_SEARCH_6_PARAMETERS_PROGROUP_compresspeptides	FALSE
RESULTS_SEARCH_6_PARAMETERS_PROGROUP_confidencepercentthresholdforexcludingothersfromquant	15
RESULTS_SEARCH_6_PARAMETERS_PROGROUP_confidencepercentthresholdforincludingselfinquant	15
RESULTS_SEARCH_6_PARAMETERS_PROGROUP_donotstoremspeaklists	FALSE
RESULTS_SEARCH_6_PARAMETERS_PROGROUP_fasta	C:\AB SCIEX\ProteinPilot Data\SearchDatabases\uniprot-zebrafish_with_Clover.fasta
RESULTS_SEARCH_6_PARAMETERS_PROGROUP_featuregroupminpepconf	0.66
RESULTS_SEARCH_6_PARAMETERS_PROGROUP_featuregroupminups	0.47
RESULTS_SEARCH_6_PARAMETERS_PROGROUP_focusingintersection	4
RESULTS_SEARCH_6_PARAMETERS_PROGROUP_focusingminimummatchconfidence	0.1
RESULTS_SEARCH_6_PARAMETERS_PROGROUP_focusingminunusedprotscore	0.1
RESULTS_SEARCH_6_PARAMETERS_PROGROUP_focusingsubsetcutoff	6
RESULTS_SEARCH_6_PARAMETERS_PROGROUP_intersection	1.3
RESULTS_SEARCH_6_PARAMETERS_PROGROUP_minimummatchconfidencecutoff	0.001
RESULTS_SEARCH_6_PARAMETERS_PROGROUP_minunusedprotscore	0.0458
RESULTS_SEARCH_6_PARAMETERS_PROGROUP_subsetcutoff	2
RESULTS_SEARCH_6_PARAMETERS_PROGROUP_unusedprotscorethresholdforexcludingothersfromquant	1.3
RESULTS_SEARCH_6_PARAMETERS_PEAKLIST_count	3088
RESULTS_SEARCH_6_PARAMETERS_PEAKLIST_filenumber	1
RESULTS_SEARCH_6_PARAMETERS_PEAKLIST_original_count	3088
RESULTS_SEARCH_6_PARAMETERS_PEAKLIST_originalfilename	C:\AB SCIEX\ProteinPilot Data\Results\Albert\ZX 20200429 6600\ZX 20200429 6600 C 1A 1.wiff
RESULTS_SEARCH_6_PARAMETERS_PEAKLIST_partnumber	3
RESULTS_SEARCH_6_PARAMETERS_QUANT_TYPE_background_correction	FALSE
RESULTS_SEARCH_6_PARAMETERS_QUANT_TYPE_bias_correction	TRUE
RESULTS_SEARCH_6_PARAMETERS_QUANT_TYPE_keep_extreme_peptides_over_fraction	0
RESULTS_SEARCH_6_PARAMETERS_QUANT_TYPE_low_confidence_check	TRUE
RESULTS_SEARCH_6_PARAMETERS_QUANT_TYPE_low_intensity_check	TRUE
RESULTS_SEARCH_6_PARAMETERS_QUANT_TYPE_median_statistic	TRUE
RESULTS_SEARCH_6_PARAMETERS_QUANT_TYPE_mod_check	TRUE
RESULTS_SEARCH_6_PARAMETERS_QUANT_TYPE_quant_threshold	-1
RESULTS_SEARCH_6_PARAMETERS_QUANT_TYPE_quant_threshold_sn	9
RESULTS_SEARCH_6_PARAMETERS_QUANT_TYPE_separate_searches	FALSE
RESULTS_SEARCH_6_PARAMETERS_QUANT_TYPE_shared_msms_check	TRUE
RESULTS_SEARCH_6_PARAMETERS_PARAGON_METHOD_SETTINGS_UI_SAMPLE_TYPE	Identification
RESULTS_SEARCH_6_PARAMETERS_PARAGON_METHOD_SETTINGS_UI_CYS_ALKYLATION	Iodoacetamide w other Cys mods possible
RESULTS_SEARCH_6_PARAMETERS_PARAGON_METHOD_SETTINGS_UI_DIGESTION	Trypsin + Lys C
RESULTS_SEARCH_6_PARAMETERS_PARAGON_METHOD_SETTINGS_UI_SPECIAL_FACTOR	Gel-based ID
RESULTS_SEARCH_6_PARAMETERS_PARAGON_METHOD_SETTINGS_UI_INSTRUMENT	TripleTOF 6600
RESULTS_SEARCH_6_PARAMETERS_PARAGON_METHOD_SETTINGS_UI_SEARCH_EFFORT	Thorough
RESULTS_SEARCH_6_PARAMETERS_PARAGON_METHOD_SETTINGS_UI_USER_NAME	IMB-MASS02\massuser
RESULTS_SEARCH_6_PARAMETERS_PARAGON_METHOD_SETTINGS_UI_MACHINE_NAME	IMB-MASS02
RESULTS_SEARCH_6_PARAMETERS_PARAGON_METHOD_SETTINGS_UI_SEARCH_ID	6.37467e+17
RESULTS_SEARCH_6_PARAMETERS_PARAGON_METHOD_SETTINGS_UI_START_TIME	2021-01-19 16:06:38
RESULTS_SEARCH_6_PARAMETERS_PARAGON_METHOD_SETTINGS_UI_MIN_UNUSED_PROTSCORE	0.0458
RESULTS_SEARCH_6_PARAMETERS_PARAGON_METHOD_SETTINGS_UI_PSPEP	TRUE
RESULTS_SEARCH_7_time_cpu	298492
RESULTS_SEARCH_7_time_duration	361387
RESULTS_SEARCH_7_version	5.0.1.4874
RESULTS_SEARCH_7_xml:id	SEARCH:1:637466691961037774_3
RESULTS_SEARCH_7_PARAMETERS_chemical_data_edited	FALSE
RESULTS_SEARCH_7_PARAMETERS_do_multiprecursor_search	TRUE
RESULTS_SEARCH_7_PARAMETERS_do_reverse_search	TRUE
RESULTS_SEARCH_7_PARAMETERS_max_quant_labels	35
RESULTS_SEARCH_7_PARAMETERS_maxresults	15
RESULTS_SEARCH_7_PARAMETERS_separate_searches	FALSE
RESULTS_SEARCH_7_PARAMETERS_MSTOLERANCE_type	dalton
RESULTS_SEARCH_7_PARAMETERS_MSTOLERANCE_value	0.05
RESULTS_SEARCH_7_PARAMETERS_MSMSTOLERANCE_type	dalton
RESULTS_SEARCH_7_PARAMETERS_MSMSTOLERANCE_value	0.1
RESULTS_SEARCH_7_PARAMETERS_MS_STANDARD_DEVIATION_type	dalton
RESULTS_SEARCH_7_PARAMETERS_MS_STANDARD_DEVIATION_value	0.0011
RESULTS_SEARCH_7_PARAMETERS_MSMS_STANDARD_DEVIATION_type	dalton
RESULTS_SEARCH_7_PARAMETERS_MSMS_STANDARD_DEVIATION_value	0.01
RESULTS_SEARCH_7_PARAMETERS_FASTA_filename	C:\AB SCIEX\ProteinPilot Data\SearchDatabases\uniprot-zebrafish_with_Clover.fasta
RESULTS_SEARCH_7_PARAMETERS_AUTO_CALIBRATION_ms	TRUE
RESULTS_SEARCH_7_PARAMETERS_AUTO_CALIBRATION_msexport	FALSE
RESULTS_SEARCH_7_PARAMETERS_AUTO_CALIBRATION_msms	TRUE
RESULTS_SEARCH_7_PARAMETERS_AUTO_CALIBRATION_msmstolsdratio	2.75
RESULTS_SEARCH_7_PARAMETERS_AUTO_CALIBRATION_mstolsdratio	7
RESULTS_SEARCH_7_PARAMETERS_AUTO_CALIBRATION_squareroot	TRUE
RESULTS_SEARCH_7_PARAMETERS_AUTO_CALIBRATION_type	dalton
RESULTS_SEARCH_7_PARAMETERS_AUTO_CALIBRATION_MCP_d_s_s_f	0.0666667
RESULTS_SEARCH_7_PARAMETERS_AUTO_CALIBRATION_MCP_d_s_w_f	3
RESULTS_SEARCH_7_PARAMETERS_AUTO_CALIBRATION_MCP_m_f_r_mbc	200
RESULTS_SEARCH_7_PARAMETERS_AUTO_CALIBRATION_MCP_m_m_c	10
RESULTS_SEARCH_7_PARAMETERS_AUTO_CALIBRATION_MCP_m_m_f_s	0.25
RESULTS_SEARCH_7_PARAMETERS_AUTO_CALIBRATION_MCP_m_m_p_f	0.33
RESULTS_SEARCH_7_PARAMETERS_AUTO_CALIBRATION_MCP_m_m_p_rms_f	1
RESULTS_SEARCH_7_PARAMETERS_AUTO_CALIBRATION_MCP_m_p_t_f	1
RESULTS_SEARCH_7_PARAMETERS_AUTO_CALIBRATION_MCP_m_r_h_n_b	15
RESULTS_SEARCH_7_PARAMETERS_AUTO_CALIBRATION_MCP_m_z_n_s	99
RESULTS_SEARCH_7_PARAMETERS_AUTO_CALIBRATION_MCP_m_z_s_mn_f_r	0.0666667
RESULTS_SEARCH_7_PARAMETERS_AUTO_CALIBRATION_MCP_m_z_s_mx_f_r	0.1
RESULTS_SEARCH_7_PARAMETERS_MS_AUTO_CALIBRATION_OUT_avres	-1.97069e-10
RESULTS_SEARCH_7_PARAMETERS_MS_AUTO_CALIBRATION_OUT_c0	-9.37322e-05
RESULTS_SEARCH_7_PARAMETERS_MS_AUTO_CALIBRATION_OUT_c1minus1	3.55258e-06
RESULTS_SEARCH_7_PARAMETERS_MS_AUTO_CALIBRATION_OUT_c2	0
RESULTS_SEARCH_7_PARAMETERS_MS_AUTO_CALIBRATION_OUT_file	1
RESULTS_SEARCH_7_PARAMETERS_MS_AUTO_CALIBRATION_OUT_partnumber	4
RESULTS_SEARCH_7_PARAMETERS_MS_AUTO_CALIBRATION_OUT_polyorder	1
RESULTS_SEARCH_7_PARAMETERS_MS_AUTO_CALIBRATION_OUT_sample	1
RESULTS_SEARCH_7_PARAMETERS_MS_AUTO_CALIBRATION_OUT_squareroot	TRUE
RESULTS_SEARCH_7_PARAMETERS_MSMS_AUTO_CALIBRATION_OUT_avres	-1.67232e-07
RESULTS_SEARCH_7_PARAMETERS_MSMS_AUTO_CALIBRATION_OUT_c0	1.69621e-05
RESULTS_SEARCH_7_PARAMETERS_MSMS_AUTO_CALIBRATION_OUT_c1minus1	-2.08975e-06
RESULTS_SEARCH_7_PARAMETERS_MSMS_AUTO_CALIBRATION_OUT_c2	0
RESULTS_SEARCH_7_PARAMETERS_MSMS_AUTO_CALIBRATION_OUT_file	1
RESULTS_SEARCH_7_PARAMETERS_MSMS_AUTO_CALIBRATION_OUT_partnumber	4
RESULTS_SEARCH_7_PARAMETERS_MSMS_AUTO_CALIBRATION_OUT_polyorder	1
RESULTS_SEARCH_7_PARAMETERS_MSMS_AUTO_CALIBRATION_OUT_sample	1
RESULTS_SEARCH_7_PARAMETERS_MSMS_AUTO_CALIBRATION_OUT_squareroot	TRUE
RESULTS_SEARCH_7_PARAMETERS_MAX_PRECURSORS_FRAGLET	5
RESULTS_SEARCH_7_PARAMETERS_MAX_PRECURSORS_TAGLET	1
RESULTS_SEARCH_7_PARAMETERS_PRECURSORS_DR_FRAGLET	10
RESULTS_SEARCH_7_PARAMETERS_PRECURSORS_DR_TAGLET	3
RESULTS_SEARCH_7_PARAMETERS_DEFAULT_CHARGE_STATE_1_charge	2
RESULTS_SEARCH_7_PARAMETERS_DEFAULT_CHARGE_STATE_1_probability	1
RESULTS_SEARCH_7_PARAMETERS_DEFAULT_CHARGE_STATE_2_charge	3
RESULTS_SEARCH_7_PARAMETERS_DEFAULT_CHARGE_STATE_2_probability	1
RESULTS_SEARCH_7_PARAMETERS_DEFAULT_CHARGE_STATE_3_charge	4
RESULTS_SEARCH_7_PARAMETERS_DEFAULT_CHARGE_STATE_3_probability	1
RESULTS_SEARCH_7_PARAMETERS_VERSION	5.0.1.0, 4895
RESULTS_SEARCH_7_PARAMETERS_PARAGON_VERSION	5.0.1.0, 4874
RESULTS_SEARCH_7_PARAMETERS_APPLICATION	ProteinPilot(tm) Software
RESULTS_SEARCH_7_PARAMETERS_PROGROUP_alternativedispositionmaximumfoldprobabilitydrop	100
RESULTS_SEARCH_7_PARAMETERS_PROGROUP_alternativedispositionmaximumfoldscoredrop	2
RESULTS_SEARCH_7_PARAMETERS_PROGROUP_autodiscordantpeptidethreshold	0.3
RESULTS_SEARCH_7_PARAMETERS_PROGROUP_bayesconfidencecalclulation	TRUE
RESULTS_SEARCH_7_PARAMETERS_PROGROUP_calibrateconfidence	TRUE
RESULTS_SEARCH_7_PARAMETERS_PROGROUP_compresspeptides	FALSE
RESULTS_SEARCH_7_PARAMETERS_PROGROUP_confidencepercentthresholdforexcludingothersfromquant	15
RESULTS_SEARCH_7_PARAMETERS_PROGROUP_confidencepercentthresholdforincludingselfinquant	15
RESULTS_SEARCH_7_PARAMETERS_PROGROUP_donotstoremspeaklists	FALSE
RESULTS_SEARCH_7_PARAMETERS_PROGROUP_fasta	C:\AB SCIEX\ProteinPilot Data\SearchDatabases\uniprot-zebrafish_with_Clover.fasta
RESULTS_SEARCH_7_PARAMETERS_PROGROUP_featuregroupminpepconf	0.66
RESULTS_SEARCH_7_PARAMETERS_PROGROUP_featuregroupminups	0.47
RESULTS_SEARCH_7_PARAMETERS_PROGROUP_focusingintersection	4
RESULTS_SEARCH_7_PARAMETERS_PROGROUP_focusingminimummatchconfidence	0.1
RESULTS_SEARCH_7_PARAMETERS_PROGROUP_focusingminunusedprotscore	0.1
RESULTS_SEARCH_7_PARAMETERS_PROGROUP_focusingsubsetcutoff	6
RESULTS_SEARCH_7_PARAMETERS_PROGROUP_intersection	1.3
RESULTS_SEARCH_7_PARAMETERS_PROGROUP_minimummatchconfidencecutoff	0.001
RESULTS_SEARCH_7_PARAMETERS_PROGROUP_minunusedprotscore	0.0458
RESULTS_SEARCH_7_PARAMETERS_PROGROUP_subsetcutoff	2
RESULTS_SEARCH_7_PARAMETERS_PROGROUP_unusedprotscorethresholdforexcludingothersfromquant	1.3
RESULTS_SEARCH_7_PARAMETERS_PEAKLIST_count	3082
RESULTS_SEARCH_7_PARAMETERS_PEAKLIST_filenumber	1
RESULTS_SEARCH_7_PARAMETERS_PEAKLIST_original_count	3082
RESULTS_SEARCH_7_PARAMETERS_PEAKLIST_originalfilename	C:\AB SCIEX\ProteinPilot Data\Results\Albert\ZX 20200429 6600\ZX 20200429 6600 C 1A 1.wiff
RESULTS_SEARCH_7_PARAMETERS_PEAKLIST_partnumber	4
RESULTS_SEARCH_7_PARAMETERS_QUANT_TYPE_background_correction	FALSE
RESULTS_SEARCH_7_PARAMETERS_QUANT_TYPE_bias_correction	TRUE
RESULTS_SEARCH_7_PARAMETERS_QUANT_TYPE_keep_extreme_peptides_over_fraction	0
RESULTS_SEARCH_7_PARAMETERS_QUANT_TYPE_low_confidence_check	TRUE
RESULTS_SEARCH_7_PARAMETERS_QUANT_TYPE_low_intensity_check	TRUE
RESULTS_SEARCH_7_PARAMETERS_QUANT_TYPE_median_statistic	TRUE
RESULTS_SEARCH_7_PARAMETERS_QUANT_TYPE_mod_check	TRUE
RESULTS_SEARCH_7_PARAMETERS_QUANT_TYPE_quant_threshold	-1
RESULTS_SEARCH_7_PARAMETERS_QUANT_TYPE_quant_threshold_sn	9
RESULTS_SEARCH_7_PARAMETERS_QUANT_TYPE_separate_searches	FALSE
RESULTS_SEARCH_7_PARAMETERS_QUANT_TYPE_shared_msms_check	TRUE
RESULTS_SEARCH_7_PARAMETERS_PARAGON_METHOD_SETTINGS_UI_SAMPLE_TYPE	Identification
RESULTS_SEARCH_7_PARAMETERS_PARAGON_METHOD_SETTINGS_UI_CYS_ALKYLATION	Iodoacetamide w other Cys mods possible
RESULTS_SEARCH_7_PARAMETERS_PARAGON_METHOD_SETTINGS_UI_DIGESTION	Trypsin + Lys C
RESULTS_SEARCH_7_PARAMETERS_PARAGON_METHOD_SETTINGS_UI_SPECIAL_FACTOR	Gel-based ID
RESULTS_SEARCH_7_PARAMETERS_PARAGON_METHOD_SETTINGS_UI_INSTRUMENT	TripleTOF 6600
RESULTS_SEARCH_7_PARAMETERS_PARAGON_METHOD_SETTINGS_UI_SEARCH_EFFORT	Thorough
RESULTS_SEARCH_7_PARAMETERS_PARAGON_METHOD_SETTINGS_UI_USER_NAME	IMB-MASS02\massuser
RESULTS_SEARCH_7_PARAMETERS_PARAGON_METHOD_SETTINGS_UI_MACHINE_NAME	IMB-MASS02
RESULTS_SEARCH_7_PARAMETERS_PARAGON_METHOD_SETTINGS_UI_SEARCH_ID	6.37467e+17
RESULTS_SEARCH_7_PARAMETERS_PARAGON_METHOD_SETTINGS_UI_START_TIME	2021-01-19 16:06:38
RESULTS_SEARCH_7_PARAMETERS_PARAGON_METHOD_SETTINGS_UI_MIN_UNUSED_PROTSCORE	0.0458
RESULTS_SEARCH_7_PARAMETERS_PARAGON_METHOD_SETTINGS_UI_PSPEP	TRUE
RESULTS_SEARCH_8_time_cpu	1226355
RESULTS_SEARCH_8_time_duration	1416378
RESULTS_SEARCH_8_version	5.0.1.4874
RESULTS_SEARCH_8_xml:id	SEARCH:2:637466691961037774_3
RESULTS_SEARCH_8_PARAMETERS_chemical_data_edited	FALSE
RESULTS_SEARCH_8_PARAMETERS_do_multiprecursor_search	TRUE
RESULTS_SEARCH_8_PARAMETERS_do_reverse_search	TRUE
RESULTS_SEARCH_8_PARAMETERS_max_quant_labels	35
RESULTS_SEARCH_8_PARAMETERS_maxresults	15
RESULTS_SEARCH_8_PARAMETERS_separate_searches	FALSE
RESULTS_SEARCH_8_PARAMETERS_MSTOLERANCE_type	dalton
RESULTS_SEARCH_8_PARAMETERS_MSTOLERANCE_value	0.05
RESULTS_SEARCH_8_PARAMETERS_MSMSTOLERANCE_type	dalton
RESULTS_SEARCH_8_PARAMETERS_MSMSTOLERANCE_value	0.1
RESULTS_SEARCH_8_PARAMETERS_MS_STANDARD_DEVIATION_type	dalton
RESULTS_SEARCH_8_PARAMETERS_MS_STANDARD_DEVIATION_value	0.0011
RESULTS_SEARCH_8_PARAMETERS_MSMS_STANDARD_DEVIATION_type	dalton
RESULTS_SEARCH_8_PARAMETERS_MSMS_STANDARD_DEVIATION_value	0.01
RESULTS_SEARCH_8_PARAMETERS_FASTA_filename	C:\AB SCIEX\ProteinPilot Data\SearchDatabases\uniprot-zebrafish_with_Clover.fasta
RESULTS_SEARCH_8_PARAMETERS_AUTO_CALIBRATION_ms	TRUE
RESULTS_SEARCH_8_PARAMETERS_AUTO_CALIBRATION_msexport	FALSE
RESULTS_SEARCH_8_PARAMETERS_AUTO_CALIBRATION_msms	TRUE
RESULTS_SEARCH_8_PARAMETERS_AUTO_CALIBRATION_msmstolsdratio	2.75
RESULTS_SEARCH_8_PARAMETERS_AUTO_CALIBRATION_mstolsdratio	7
RESULTS_SEARCH_8_PARAMETERS_AUTO_CALIBRATION_squareroot	TRUE
RESULTS_SEARCH_8_PARAMETERS_AUTO_CALIBRATION_type	dalton
RESULTS_SEARCH_8_PARAMETERS_AUTO_CALIBRATION_MCP_d_s_s_f	0.0666667
RESULTS_SEARCH_8_PARAMETERS_AUTO_CALIBRATION_MCP_d_s_w_f	3
RESULTS_SEARCH_8_PARAMETERS_AUTO_CALIBRATION_MCP_m_f_r_mbc	200
RESULTS_SEARCH_8_PARAMETERS_AUTO_CALIBRATION_MCP_m_m_c	10
RESULTS_SEARCH_8_PARAMETERS_AUTO_CALIBRATION_MCP_m_m_f_s	0.25
RESULTS_SEARCH_8_PARAMETERS_AUTO_CALIBRATION_MCP_m_m_p_f	0.33
RESULTS_SEARCH_8_PARAMETERS_AUTO_CALIBRATION_MCP_m_m_p_rms_f	1
RESULTS_SEARCH_8_PARAMETERS_AUTO_CALIBRATION_MCP_m_p_t_f	1
RESULTS_SEARCH_8_PARAMETERS_AUTO_CALIBRATION_MCP_m_r_h_n_b	15
RESULTS_SEARCH_8_PARAMETERS_AUTO_CALIBRATION_MCP_m_z_n_s	99
RESULTS_SEARCH_8_PARAMETERS_AUTO_CALIBRATION_MCP_m_z_s_mn_f_r	0.0666667
RESULTS_SEARCH_8_PARAMETERS_AUTO_CALIBRATION_MCP_m_z_s_mx_f_r	0.1
RESULTS_SEARCH_8_PARAMETERS_MS_AUTO_CALIBRATION_OUT_avres	-1.97069e-10
RESULTS_SEARCH_8_PARAMETERS_MS_AUTO_CALIBRATION_OUT_c0	-9.37322e-05
RESULTS_SEARCH_8_PARAMETERS_MS_AUTO_CALIBRATION_OUT_c1minus1	3.55258e-06
RESULTS_SEARCH_8_PARAMETERS_MS_AUTO_CALIBRATION_OUT_c2	0
RESULTS_SEARCH_8_PARAMETERS_MS_AUTO_CALIBRATION_OUT_file	1
RESULTS_SEARCH_8_PARAMETERS_MS_AUTO_CALIBRATION_OUT_partnumber	4
RESULTS_SEARCH_8_PARAMETERS_MS_AUTO_CALIBRATION_OUT_polyorder	1
RESULTS_SEARCH_8_PARAMETERS_MS_AUTO_CALIBRATION_OUT_sample	1
RESULTS_SEARCH_8_PARAMETERS_MS_AUTO_CALIBRATION_OUT_squareroot	TRUE
RESULTS_SEARCH_8_PARAMETERS_MSMS_AUTO_CALIBRATION_OUT_avres	-1.67232e-07
RESULTS_SEARCH_8_PARAMETERS_MSMS_AUTO_CALIBRATION_OUT_c0	1.69621e-05
RESULTS_SEARCH_8_PARAMETERS_MSMS_AUTO_CALIBRATION_OUT_c1minus1	-2.08975e-06
RESULTS_SEARCH_8_PARAMETERS_MSMS_AUTO_CALIBRATION_OUT_c2	0
RESULTS_SEARCH_8_PARAMETERS_MSMS_AUTO_CALIBRATION_OUT_file	1
RESULTS_SEARCH_8_PARAMETERS_MSMS_AUTO_CALIBRATION_OUT_partnumber	4
RESULTS_SEARCH_8_PARAMETERS_MSMS_AUTO_CALIBRATION_OUT_polyorder	1
RESULTS_SEARCH_8_PARAMETERS_MSMS_AUTO_CALIBRATION_OUT_sample	1
RESULTS_SEARCH_8_PARAMETERS_MSMS_AUTO_CALIBRATION_OUT_squareroot	TRUE
RESULTS_SEARCH_8_PARAMETERS_MAX_PRECURSORS_FRAGLET	5
RESULTS_SEARCH_8_PARAMETERS_MAX_PRECURSORS_TAGLET	1
RESULTS_SEARCH_8_PARAMETERS_PRECURSORS_DR_FRAGLET	10
RESULTS_SEARCH_8_PARAMETERS_PRECURSORS_DR_TAGLET	3
RESULTS_SEARCH_8_PARAMETERS_DEFAULT_CHARGE_STATE_1_charge	2
RESULTS_SEARCH_8_PARAMETERS_DEFAULT_CHARGE_STATE_1_probability	1
RESULTS_SEARCH_8_PARAMETERS_DEFAULT_CHARGE_STATE_2_charge	1900-01-03
RESULTS_SEARCH_8_PARAMETERS_DEFAULT_CHARGE_STATE_2_probability	1900-01-01
RESULTS_SEARCH_8_PARAMETERS_DEFAULT_CHARGE_STATE_3_charge	4
RESULTS_SEARCH_8_PARAMETERS_DEFAULT_CHARGE_STATE_3_probability	1
RESULTS_SEARCH_8_PARAMETERS_VERSION	5.0.1.0, 4895
RESULTS_SEARCH_8_PARAMETERS_PARAGON_VERSION	5.0.1.0, 4874
RESULTS_SEARCH_8_PARAMETERS_APPLICATION	ProteinPilot(tm) Software
RESULTS_SEARCH_8_PARAMETERS_PROGROUP_alternativedispositionmaximumfoldprobabilitydrop	100
RESULTS_SEARCH_8_PARAMETERS_PROGROUP_alternativedispositionmaximumfoldscoredrop	2
RESULTS_SEARCH_8_PARAMETERS_PROGROUP_autodiscordantpeptidethreshold	0.3
RESULTS_SEARCH_8_PARAMETERS_PROGROUP_bayesconfidencecalclulation	TRUE
RESULTS_SEARCH_8_PARAMETERS_PROGROUP_calibrateconfidence	TRUE
RESULTS_SEARCH_8_PARAMETERS_PROGROUP_compresspeptides	FALSE
RESULTS_SEARCH_8_PARAMETERS_PROGROUP_confidencepercentthresholdforexcludingothersfromquant	15
RESULTS_SEARCH_8_PARAMETERS_PROGROUP_confidencepercentthresholdforincludingselfinquant	15
RESULTS_SEARCH_8_PARAMETERS_PROGROUP_donotstoremspeaklists	FALSE
RESULTS_SEARCH_8_PARAMETERS_PROGROUP_fasta	C:\AB SCIEX\ProteinPilot Data\SearchDatabases\uniprot-zebrafish_with_Clover.fasta
RESULTS_SEARCH_8_PARAMETERS_PROGROUP_featuregroupminpepconf	0.66
RESULTS_SEARCH_8_PARAMETERS_PROGROUP_featuregroupminups	0.47
RESULTS_SEARCH_8_PARAMETERS_PROGROUP_focusingintersection	4
RESULTS_SEARCH_8_PARAMETERS_PROGROUP_focusingminimummatchconfidence	0.1
RESULTS_SEARCH_8_PARAMETERS_PROGROUP_focusingminunusedprotscore	0.1
RESULTS_SEARCH_8_PARAMETERS_PROGROUP_focusingsubsetcutoff	6
RESULTS_SEARCH_8_PARAMETERS_PROGROUP_intersection	1.3
RESULTS_SEARCH_8_PARAMETERS_PROGROUP_minimummatchconfidencecutoff	0.001
RESULTS_SEARCH_8_PARAMETERS_PROGROUP_minunusedprotscore	0.0458
RESULTS_SEARCH_8_PARAMETERS_PROGROUP_subsetcutoff	2
RESULTS_SEARCH_8_PARAMETERS_PROGROUP_unusedprotscorethresholdforexcludingothersfromquant	1.3
RESULTS_SEARCH_8_PARAMETERS_PEAKLIST_count	3082
RESULTS_SEARCH_8_PARAMETERS_PEAKLIST_filenumber	1
RESULTS_SEARCH_8_PARAMETERS_PEAKLIST_original_count	3082
RESULTS_SEARCH_8_PARAMETERS_PEAKLIST_originalfilename	C:\AB SCIEX\ProteinPilot Data\Results\Albert\ZX 20200429 6600\ZX 20200429 6600 C 1A 1.wiff
RESULTS_SEARCH_8_PARAMETERS_PEAKLIST_partnumber	4
RESULTS_SEARCH_8_PARAMETERS_QUANT_TYPE_background_correction	FALSE
RESULTS_SEARCH_8_PARAMETERS_QUANT_TYPE_bias_correction	TRUE
RESULTS_SEARCH_8_PARAMETERS_QUANT_TYPE_keep_extreme_peptides_over_fraction	0
RESULTS_SEARCH_8_PARAMETERS_QUANT_TYPE_low_confidence_check	TRUE
RESULTS_SEARCH_8_PARAMETERS_QUANT_TYPE_low_intensity_check	TRUE
RESULTS_SEARCH_8_PARAMETERS_QUANT_TYPE_median_statistic	TRUE
RESULTS_SEARCH_8_PARAMETERS_QUANT_TYPE_mod_check	TRUE
RESULTS_SEARCH_8_PARAMETERS_QUANT_TYPE_quant_threshold	-1
RESULTS_SEARCH_8_PARAMETERS_QUANT_TYPE_quant_threshold_sn	9
RESULTS_SEARCH_8_PARAMETERS_QUANT_TYPE_separate_searches	FALSE
RESULTS_SEARCH_8_PARAMETERS_QUANT_TYPE_shared_msms_check	TRUE
RESULTS_SEARCH_8_PARAMETERS_PARAGON_METHOD_SETTINGS_UI_SAMPLE_TYPE	Identification
RESULTS_SEARCH_8_PARAMETERS_PARAGON_METHOD_SETTINGS_UI_CYS_ALKYLATION	Iodoacetamide w other Cys mods possible
RESULTS_SEARCH_8_PARAMETERS_PARAGON_METHOD_SETTINGS_UI_DIGESTION	Trypsin + Lys C
RESULTS_SEARCH_8_PARAMETERS_PARAGON_METHOD_SETTINGS_UI_SPECIAL_FACTOR	Gel-based ID
RESULTS_SEARCH_8_PARAMETERS_PARAGON_METHOD_SETTINGS_UI_INSTRUMENT	TripleTOF 6600
RESULTS_SEARCH_8_PARAMETERS_PARAGON_METHOD_SETTINGS_UI_SEARCH_EFFORT	Thorough
RESULTS_SEARCH_8_PARAMETERS_PARAGON_METHOD_SETTINGS_UI_USER_NAME	IMB-MASS02\massuser
RESULTS_SEARCH_8_PARAMETERS_PARAGON_METHOD_SETTINGS_UI_MACHINE_NAME	IMB-MASS02
RESULTS_SEARCH_8_PARAMETERS_PARAGON_METHOD_SETTINGS_UI_SEARCH_ID	6.37467e+17
RESULTS_SEARCH_8_PARAMETERS_PARAGON_METHOD_SETTINGS_UI_START_TIME	2021-01-19 16:06:38
RESULTS_SEARCH_8_PARAMETERS_PARAGON_METHOD_SETTINGS_UI_MIN_UNUSED_PROTSCORE	0.0458
RESULTS_SEARCH_8_PARAMETERS_PARAGON_METHOD_SETTINGS_UI_PSPEP	TRUE
RESULTS_SEARCH_9_time_cpu	215686
RESULTS_SEARCH_9_time_duration	258907
RESULTS_SEARCH_9_version	5.0.1.4874
RESULTS_SEARCH_9_xml:id	SEARCH:1:637466691961037774_4
RESULTS_SEARCH_9_PARAMETERS_chemical_data_edited	FALSE
RESULTS_SEARCH_9_PARAMETERS_do_multiprecursor_search	TRUE
RESULTS_SEARCH_9_PARAMETERS_do_reverse_search	TRUE
RESULTS_SEARCH_9_PARAMETERS_max_quant_labels	35
RESULTS_SEARCH_9_PARAMETERS_maxresults	15
RESULTS_SEARCH_9_PARAMETERS_separate_searches	FALSE
RESULTS_SEARCH_9_PARAMETERS_MSTOLERANCE_type	dalton
RESULTS_SEARCH_9_PARAMETERS_MSTOLERANCE_value	0.05
RESULTS_SEARCH_9_PARAMETERS_MSMSTOLERANCE_type	dalton
RESULTS_SEARCH_9_PARAMETERS_MSMSTOLERANCE_value	0.1
RESULTS_SEARCH_9_PARAMETERS_MS_STANDARD_DEVIATION_type	dalton
RESULTS_SEARCH_9_PARAMETERS_MS_STANDARD_DEVIATION_value	0.0011
RESULTS_SEARCH_9_PARAMETERS_MSMS_STANDARD_DEVIATION_type	dalton
RESULTS_SEARCH_9_PARAMETERS_MSMS_STANDARD_DEVIATION_value	0.01
RESULTS_SEARCH_9_PARAMETERS_FASTA_filename	C:\AB SCIEX\ProteinPilot Data\SearchDatabases\uniprot-zebrafish_with_Clover.fasta
RESULTS_SEARCH_9_PARAMETERS_AUTO_CALIBRATION_ms	TRUE
RESULTS_SEARCH_9_PARAMETERS_AUTO_CALIBRATION_msexport	FALSE
RESULTS_SEARCH_9_PARAMETERS_AUTO_CALIBRATION_msms	TRUE
RESULTS_SEARCH_9_PARAMETERS_AUTO_CALIBRATION_msmstolsdratio	2.75
RESULTS_SEARCH_9_PARAMETERS_AUTO_CALIBRATION_mstolsdratio	7
RESULTS_SEARCH_9_PARAMETERS_AUTO_CALIBRATION_squareroot	TRUE
RESULTS_SEARCH_9_PARAMETERS_AUTO_CALIBRATION_type	dalton
RESULTS_SEARCH_9_PARAMETERS_AUTO_CALIBRATION_MCP_d_s_s_f	0.0666667
RESULTS_SEARCH_9_PARAMETERS_AUTO_CALIBRATION_MCP_d_s_w_f	3
RESULTS_SEARCH_9_PARAMETERS_AUTO_CALIBRATION_MCP_m_f_r_mbc	200
RESULTS_SEARCH_9_PARAMETERS_AUTO_CALIBRATION_MCP_m_m_c	10
RESULTS_SEARCH_9_PARAMETERS_AUTO_CALIBRATION_MCP_m_m_f_s	0.25
RESULTS_SEARCH_9_PARAMETERS_AUTO_CALIBRATION_MCP_m_m_p_f	0.33
RESULTS_SEARCH_9_PARAMETERS_AUTO_CALIBRATION_MCP_m_m_p_rms_f	1
RESULTS_SEARCH_9_PARAMETERS_AUTO_CALIBRATION_MCP_m_p_t_f	1
RESULTS_SEARCH_9_PARAMETERS_AUTO_CALIBRATION_MCP_m_r_h_n_b	15
RESULTS_SEARCH_9_PARAMETERS_AUTO_CALIBRATION_MCP_m_z_n_s	99
RESULTS_SEARCH_9_PARAMETERS_AUTO_CALIBRATION_MCP_m_z_s_mn_f_r	0.0666667
RESULTS_SEARCH_9_PARAMETERS_AUTO_CALIBRATION_MCP_m_z_s_mx_f_r	0.1
RESULTS_SEARCH_9_PARAMETERS_MS_AUTO_CALIBRATION_OUT_avres	-4.77842e-10
RESULTS_SEARCH_9_PARAMETERS_MS_AUTO_CALIBRATION_OUT_c0	7.98139e-05
RESULTS_SEARCH_9_PARAMETERS_MS_AUTO_CALIBRATION_OUT_c1minus1	-4.24177e-06
RESULTS_SEARCH_9_PARAMETERS_MS_AUTO_CALIBRATION_OUT_c2	0
RESULTS_SEARCH_9_PARAMETERS_MS_AUTO_CALIBRATION_OUT_file	2
RESULTS_SEARCH_9_PARAMETERS_MS_AUTO_CALIBRATION_OUT_partnumber	5
RESULTS_SEARCH_9_PARAMETERS_MS_AUTO_CALIBRATION_OUT_polyorder	1
RESULTS_SEARCH_9_PARAMETERS_MS_AUTO_CALIBRATION_OUT_sample	1
RESULTS_SEARCH_9_PARAMETERS_MS_AUTO_CALIBRATION_OUT_squareroot	TRUE
RESULTS_SEARCH_9_PARAMETERS_MSMS_AUTO_CALIBRATION_OUT_avres	-4.15592e-08
RESULTS_SEARCH_9_PARAMETERS_MSMS_AUTO_CALIBRATION_OUT_c0	7.49642e-06
RESULTS_SEARCH_9_PARAMETERS_MSMS_AUTO_CALIBRATION_OUT_c1minus1	-1.25541e-06
RESULTS_SEARCH_9_PARAMETERS_MSMS_AUTO_CALIBRATION_OUT_c2	0
RESULTS_SEARCH_9_PARAMETERS_MSMS_AUTO_CALIBRATION_OUT_file	2
RESULTS_SEARCH_9_PARAMETERS_MSMS_AUTO_CALIBRATION_OUT_partnumber	5
RESULTS_SEARCH_9_PARAMETERS_MSMS_AUTO_CALIBRATION_OUT_polyorder	1
RESULTS_SEARCH_9_PARAMETERS_MSMS_AUTO_CALIBRATION_OUT_sample	1
RESULTS_SEARCH_9_PARAMETERS_MSMS_AUTO_CALIBRATION_OUT_squareroot	TRUE
RESULTS_SEARCH_9_PARAMETERS_MAX_PRECURSORS_FRAGLET	5
RESULTS_SEARCH_9_PARAMETERS_MAX_PRECURSORS_TAGLET	1
RESULTS_SEARCH_9_PARAMETERS_PRECURSORS_DR_FRAGLET	10
RESULTS_SEARCH_9_PARAMETERS_PRECURSORS_DR_TAGLET	3
RESULTS_SEARCH_9_PARAMETERS_DEFAULT_CHARGE_STATE_1_charge	2
RESULTS_SEARCH_9_PARAMETERS_DEFAULT_CHARGE_STATE_1_probability	1
RESULTS_SEARCH_9_PARAMETERS_DEFAULT_CHARGE_STATE_2_charge	3
RESULTS_SEARCH_9_PARAMETERS_DEFAULT_CHARGE_STATE_2_probability	1
RESULTS_SEARCH_9_PARAMETERS_DEFAULT_CHARGE_STATE_3_charge	4
RESULTS_SEARCH_9_PARAMETERS_DEFAULT_CHARGE_STATE_3_probability	1
RESULTS_SEARCH_9_PARAMETERS_VERSION	5.0.1.0, 4895
RESULTS_SEARCH_9_PARAMETERS_PARAGON_VERSION	5.0.1.0, 4874
RESULTS_SEARCH_9_PARAMETERS_APPLICATION	ProteinPilot(tm) Software
RESULTS_SEARCH_9_PARAMETERS_PROGROUP_alternativedispositionmaximumfoldprobabilitydrop	100
RESULTS_SEARCH_9_PARAMETERS_PROGROUP_alternativedispositionmaximumfoldscoredrop	2
RESULTS_SEARCH_9_PARAMETERS_PROGROUP_autodiscordantpeptidethreshold	0.3
RESULTS_SEARCH_9_PARAMETERS_PROGROUP_bayesconfidencecalclulation	TRUE
RESULTS_SEARCH_9_PARAMETERS_PROGROUP_calibrateconfidence	TRUE
RESULTS_SEARCH_9_PARAMETERS_PROGROUP_compresspeptides	FALSE
RESULTS_SEARCH_9_PARAMETERS_PROGROUP_confidencepercentthresholdforexcludingothersfromquant	15
RESULTS_SEARCH_9_PARAMETERS_PROGROUP_confidencepercentthresholdforincludingselfinquant	15
RESULTS_SEARCH_9_PARAMETERS_PROGROUP_donotstoremspeaklists	FALSE
RESULTS_SEARCH_9_PARAMETERS_PROGROUP_fasta	C:\AB SCIEX\ProteinPilot Data\SearchDatabases\uniprot-zebrafish_with_Clover.fasta
RESULTS_SEARCH_9_PARAMETERS_PROGROUP_featuregroupminpepconf	0.66
RESULTS_SEARCH_9_PARAMETERS_PROGROUP_featuregroupminups	0.47
RESULTS_SEARCH_9_PARAMETERS_PROGROUP_focusingintersection	4
RESULTS_SEARCH_9_PARAMETERS_PROGROUP_focusingminimummatchconfidence	0.1
RESULTS_SEARCH_9_PARAMETERS_PROGROUP_focusingminunusedprotscore	02:24:00
RESULTS_SEARCH_9_PARAMETERS_PROGROUP_focusingsubsetcutoff	6
RESULTS_SEARCH_9_PARAMETERS_PROGROUP_intersection	1.3
RESULTS_SEARCH_9_PARAMETERS_PROGROUP_minimummatchconfidencecutoff	0.001
RESULTS_SEARCH_9_PARAMETERS_PROGROUP_minunusedprotscore	0.0458
RESULTS_SEARCH_9_PARAMETERS_PROGROUP_subsetcutoff	2
RESULTS_SEARCH_9_PARAMETERS_PROGROUP_unusedprotscorethresholdforexcludingothersfromquant	1.3
RESULTS_SEARCH_9_PARAMETERS_PEAKLIST_count	3749
RESULTS_SEARCH_9_PARAMETERS_PEAKLIST_filenumber	2
RESULTS_SEARCH_9_PARAMETERS_PEAKLIST_original_count	3749
RESULTS_SEARCH_9_PARAMETERS_PEAKLIST_originalfilename	C:\AB SCIEX\ProteinPilot Data\Results\Albert\ZX 20200429 6600\ZX 20200429 6600 C 1A 2.wiff
RESULTS_SEARCH_9_PARAMETERS_PEAKLIST_partnumber	5
RESULTS_SEARCH_9_PARAMETERS_QUANT_TYPE_background_correction	FALSE
RESULTS_SEARCH_9_PARAMETERS_QUANT_TYPE_bias_correction	TRUE
RESULTS_SEARCH_9_PARAMETERS_QUANT_TYPE_keep_extreme_peptides_over_fraction	0
RESULTS_SEARCH_9_PARAMETERS_QUANT_TYPE_low_confidence_check	TRUE
RESULTS_SEARCH_9_PARAMETERS_QUANT_TYPE_low_intensity_check	TRUE
RESULTS_SEARCH_9_PARAMETERS_QUANT_TYPE_median_statistic	TRUE
RESULTS_SEARCH_9_PARAMETERS_QUANT_TYPE_mod_check	TRUE
RESULTS_SEARCH_9_PARAMETERS_QUANT_TYPE_quant_threshold	-1
RESULTS_SEARCH_9_PARAMETERS_QUANT_TYPE_quant_threshold_sn	9
RESULTS_SEARCH_9_PARAMETERS_QUANT_TYPE_separate_searches	FALSE
RESULTS_SEARCH_9_PARAMETERS_QUANT_TYPE_shared_msms_check	TRUE
RESULTS_SEARCH_9_PARAMETERS_PARAGON_METHOD_SETTINGS_UI_SAMPLE_TYPE	Identification
RESULTS_SEARCH_9_PARAMETERS_PARAGON_METHOD_SETTINGS_UI_CYS_ALKYLATION	Iodoacetamide w other Cys mods possible
RESULTS_SEARCH_9_PARAMETERS_PARAGON_METHOD_SETTINGS_UI_DIGESTION	Trypsin + Lys C
RESULTS_SEARCH_9_PARAMETERS_PARAGON_METHOD_SETTINGS_UI_SPECIAL_FACTOR	Gel-based ID
RESULTS_SEARCH_9_PARAMETERS_PARAGON_METHOD_SETTINGS_UI_INSTRUMENT	TripleTOF 6600
RESULTS_SEARCH_9_PARAMETERS_PARAGON_METHOD_SETTINGS_UI_SEARCH_EFFORT	Thorough
RESULTS_SEARCH_9_PARAMETERS_PARAGON_METHOD_SETTINGS_UI_USER_NAME	IMB-MASS02\massuser
RESULTS_SEARCH_9_PARAMETERS_PARAGON_METHOD_SETTINGS_UI_MACHINE_NAME	IMB-MASS02
RESULTS_SEARCH_9_PARAMETERS_PARAGON_METHOD_SETTINGS_UI_SEARCH_ID	6.37467e+17
RESULTS_SEARCH_9_PARAMETERS_PARAGON_METHOD_SETTINGS_UI_START_TIME	2021-01-19 16:06:38
RESULTS_SEARCH_9_PARAMETERS_PARAGON_METHOD_SETTINGS_UI_MIN_UNUSED_PROTSCORE	0.0458
RESULTS_SEARCH_9_PARAMETERS_PARAGON_METHOD_SETTINGS_UI_PSPEP	TRUE
RESULTS_SEARCH_10_time_cpu	250568
RESULTS_SEARCH_10_time_duration	275069
RESULTS_SEARCH_10_version	5.0.1.4874
RESULTS_SEARCH_10_xml:id	SEARCH:2:637466691961037774_4
RESULTS_SEARCH_10_PARAMETERS_chemical_data_edited	FALSE
RESULTS_SEARCH_10_PARAMETERS_do_multiprecursor_search	TRUE
RESULTS_SEARCH_10_PARAMETERS_do_reverse_search	TRUE
RESULTS_SEARCH_10_PARAMETERS_max_quant_labels	35
RESULTS_SEARCH_10_PARAMETERS_maxresults	15
RESULTS_SEARCH_10_PARAMETERS_separate_searches	FALSE
RESULTS_SEARCH_10_PARAMETERS_MSTOLERANCE_type	dalton
RESULTS_SEARCH_10_PARAMETERS_MSTOLERANCE_value	0.05
RESULTS_SEARCH_10_PARAMETERS_MSMSTOLERANCE_type	dalton
RESULTS_SEARCH_10_PARAMETERS_MSMSTOLERANCE_value	0.1
RESULTS_SEARCH_10_PARAMETERS_MS_STANDARD_DEVIATION_type	dalton
RESULTS_SEARCH_10_PARAMETERS_MS_STANDARD_DEVIATION_value	0.0011
RESULTS_SEARCH_10_PARAMETERS_MSMS_STANDARD_DEVIATION_type	dalton
RESULTS_SEARCH_10_PARAMETERS_MSMS_STANDARD_DEVIATION_value	0.01
RESULTS_SEARCH_10_PARAMETERS_FASTA_filename	C:\AB SCIEX\ProteinPilot Data\SearchDatabases\uniprot-zebrafish_with_Clover.fasta
RESULTS_SEARCH_10_PARAMETERS_AUTO_CALIBRATION_ms	TRUE
RESULTS_SEARCH_10_PARAMETERS_AUTO_CALIBRATION_msexport	FALSE
RESULTS_SEARCH_10_PARAMETERS_AUTO_CALIBRATION_msms	TRUE
RESULTS_SEARCH_10_PARAMETERS_AUTO_CALIBRATION_msmstolsdratio	2.75
RESULTS_SEARCH_10_PARAMETERS_AUTO_CALIBRATION_mstolsdratio	7
RESULTS_SEARCH_10_PARAMETERS_AUTO_CALIBRATION_squareroot	TRUE
RESULTS_SEARCH_10_PARAMETERS_AUTO_CALIBRATION_type	dalton
RESULTS_SEARCH_10_PARAMETERS_AUTO_CALIBRATION_MCP_d_s_s_f	0.0666667
RESULTS_SEARCH_10_PARAMETERS_AUTO_CALIBRATION_MCP_d_s_w_f	3
RESULTS_SEARCH_10_PARAMETERS_AUTO_CALIBRATION_MCP_m_f_r_mbc	200
RESULTS_SEARCH_10_PARAMETERS_AUTO_CALIBRATION_MCP_m_m_c	10
RESULTS_SEARCH_10_PARAMETERS_AUTO_CALIBRATION_MCP_m_m_f_s	0.25
RESULTS_SEARCH_10_PARAMETERS_AUTO_CALIBRATION_MCP_m_m_p_f	0.33
RESULTS_SEARCH_10_PARAMETERS_AUTO_CALIBRATION_MCP_m_m_p_rms_f	1
RESULTS_SEARCH_10_PARAMETERS_AUTO_CALIBRATION_MCP_m_p_t_f	1
RESULTS_SEARCH_10_PARAMETERS_AUTO_CALIBRATION_MCP_m_r_h_n_b	15
RESULTS_SEARCH_10_PARAMETERS_AUTO_CALIBRATION_MCP_m_z_n_s	99
RESULTS_SEARCH_10_PARAMETERS_AUTO_CALIBRATION_MCP_m_z_s_mn_f_r	0.0666667
RESULTS_SEARCH_10_PARAMETERS_AUTO_CALIBRATION_MCP_m_z_s_mx_f_r	0.1
RESULTS_SEARCH_10_PARAMETERS_MS_AUTO_CALIBRATION_OUT_avres	-4.77842e-10
RESULTS_SEARCH_10_PARAMETERS_MS_AUTO_CALIBRATION_OUT_c0	7.98139e-05
RESULTS_SEARCH_10_PARAMETERS_MS_AUTO_CALIBRATION_OUT_c1minus1	-4.24177e-06
RESULTS_SEARCH_10_PARAMETERS_MS_AUTO_CALIBRATION_OUT_c2	0
RESULTS_SEARCH_10_PARAMETERS_MS_AUTO_CALIBRATION_OUT_file	2
RESULTS_SEARCH_10_PARAMETERS_MS_AUTO_CALIBRATION_OUT_partnumber	5
RESULTS_SEARCH_10_PARAMETERS_MS_AUTO_CALIBRATION_OUT_polyorder	1
RESULTS_SEARCH_10_PARAMETERS_MS_AUTO_CALIBRATION_OUT_sample	1
RESULTS_SEARCH_10_PARAMETERS_MS_AUTO_CALIBRATION_OUT_squareroot	TRUE
RESULTS_SEARCH_10_PARAMETERS_MSMS_AUTO_CALIBRATION_OUT_avres	-4.15592e-08
RESULTS_SEARCH_10_PARAMETERS_MSMS_AUTO_CALIBRATION_OUT_c0	7.49642e-06
RESULTS_SEARCH_10_PARAMETERS_MSMS_AUTO_CALIBRATION_OUT_c1minus1	-1.25541e-06
RESULTS_SEARCH_10_PARAMETERS_MSMS_AUTO_CALIBRATION_OUT_c2	0
RESULTS_SEARCH_10_PARAMETERS_MSMS_AUTO_CALIBRATION_OUT_file	2
RESULTS_SEARCH_10_PARAMETERS_MSMS_AUTO_CALIBRATION_OUT_partnumber	5
RESULTS_SEARCH_10_PARAMETERS_MSMS_AUTO_CALIBRATION_OUT_polyorder	1
RESULTS_SEARCH_10_PARAMETERS_MSMS_AUTO_CALIBRATION_OUT_sample	1
RESULTS_SEARCH_10_PARAMETERS_MSMS_AUTO_CALIBRATION_OUT_squareroot	TRUE
RESULTS_SEARCH_10_PARAMETERS_MAX_PRECURSORS_FRAGLET	5
RESULTS_SEARCH_10_PARAMETERS_MAX_PRECURSORS_TAGLET	1
RESULTS_SEARCH_10_PARAMETERS_PRECURSORS_DR_FRAGLET	10
RESULTS_SEARCH_10_PARAMETERS_PRECURSORS_DR_TAGLET	3
RESULTS_SEARCH_10_PARAMETERS_DEFAULT_CHARGE_STATE_1_charge	2
RESULTS_SEARCH_10_PARAMETERS_DEFAULT_CHARGE_STATE_1_probability	1
RESULTS_SEARCH_10_PARAMETERS_DEFAULT_CHARGE_STATE_2_charge	3
RESULTS_SEARCH_10_PARAMETERS_DEFAULT_CHARGE_STATE_2_probability	1
RESULTS_SEARCH_10_PARAMETERS_DEFAULT_CHARGE_STATE_3_charge	4
RESULTS_SEARCH_10_PARAMETERS_DEFAULT_CHARGE_STATE_3_probability	1
RESULTS_SEARCH_10_PARAMETERS_VERSION	5.0.1.0, 4895
RESULTS_SEARCH_10_PARAMETERS_PARAGON_VERSION	5.0.1.0, 4874
RESULTS_SEARCH_10_PARAMETERS_APPLICATION	ProteinPilot(tm) Software
RESULTS_SEARCH_10_PARAMETERS_PROGROUP_alternativedispositionmaximumfoldprobabilitydrop	100
RESULTS_SEARCH_10_PARAMETERS_PROGROUP_alternativedispositionmaximumfoldscoredrop	2
RESULTS_SEARCH_10_PARAMETERS_PROGROUP_autodiscordantpeptidethreshold	0.3
RESULTS_SEARCH_10_PARAMETERS_PROGROUP_bayesconfidencecalclulation	TRUE
RESULTS_SEARCH_10_PARAMETERS_PROGROUP_calibrateconfidence	TRUE
RESULTS_SEARCH_10_PARAMETERS_PROGROUP_compresspeptides	FALSE
RESULTS_SEARCH_10_PARAMETERS_PROGROUP_confidencepercentthresholdforexcludingothersfromquant	15
RESULTS_SEARCH_10_PARAMETERS_PROGROUP_confidencepercentthresholdforincludingselfinquant	15
RESULTS_SEARCH_10_PARAMETERS_PROGROUP_donotstoremspeaklists	FALSE
RESULTS_SEARCH_10_PARAMETERS_PROGROUP_fasta	C:\AB SCIEX\ProteinPilot Data\SearchDatabases\uniprot-zebrafish_with_Clover.fasta
RESULTS_SEARCH_10_PARAMETERS_PROGROUP_featuregroupminpepconf	0.66
RESULTS_SEARCH_10_PARAMETERS_PROGROUP_featuregroupminups	0.47
RESULTS_SEARCH_10_PARAMETERS_PROGROUP_focusingintersection	4
RESULTS_SEARCH_10_PARAMETERS_PROGROUP_focusingminimummatchconfidence	0.1
RESULTS_SEARCH_10_PARAMETERS_PROGROUP_focusingminunusedprotscore	02:24:00
RESULTS_SEARCH_10_PARAMETERS_PROGROUP_focusingsubsetcutoff	6
RESULTS_SEARCH_10_PARAMETERS_PROGROUP_intersection	1.3
RESULTS_SEARCH_10_PARAMETERS_PROGROUP_minimummatchconfidencecutoff	0.001
RESULTS_SEARCH_10_PARAMETERS_PROGROUP_minunusedprotscore	0.0458
RESULTS_SEARCH_10_PARAMETERS_PROGROUP_subsetcutoff	2
RESULTS_SEARCH_10_PARAMETERS_PROGROUP_unusedprotscorethresholdforexcludingothersfromquant	1.3
RESULTS_SEARCH_10_PARAMETERS_PEAKLIST_count	3749
RESULTS_SEARCH_10_PARAMETERS_PEAKLIST_filenumber	2
RESULTS_SEARCH_10_PARAMETERS_PEAKLIST_original_count	3749
RESULTS_SEARCH_10_PARAMETERS_PEAKLIST_originalfilename	C:\AB SCIEX\ProteinPilot Data\Results\Albert\ZX 20200429 6600\ZX 20200429 6600 C 1A 2.wiff
RESULTS_SEARCH_10_PARAMETERS_PEAKLIST_partnumber	5
RESULTS_SEARCH_10_PARAMETERS_QUANT_TYPE_background_correction	FALSE
RESULTS_SEARCH_10_PARAMETERS_QUANT_TYPE_bias_correction	TRUE
RESULTS_SEARCH_10_PARAMETERS_QUANT_TYPE_keep_extreme_peptides_over_fraction	0
RESULTS_SEARCH_10_PARAMETERS_QUANT_TYPE_low_confidence_check	TRUE
RESULTS_SEARCH_10_PARAMETERS_QUANT_TYPE_low_intensity_check	TRUE
RESULTS_SEARCH_10_PARAMETERS_QUANT_TYPE_median_statistic	TRUE
RESULTS_SEARCH_10_PARAMETERS_QUANT_TYPE_mod_check	TRUE
RESULTS_SEARCH_10_PARAMETERS_QUANT_TYPE_quant_threshold	-1
RESULTS_SEARCH_10_PARAMETERS_QUANT_TYPE_quant_threshold_sn	9
RESULTS_SEARCH_10_PARAMETERS_QUANT_TYPE_separate_searches	FALSE
RESULTS_SEARCH_10_PARAMETERS_QUANT_TYPE_shared_msms_check	TRUE
RESULTS_SEARCH_10_PARAMETERS_PARAGON_METHOD_SETTINGS_UI_SAMPLE_TYPE	Identification
RESULTS_SEARCH_10_PARAMETERS_PARAGON_METHOD_SETTINGS_UI_CYS_ALKYLATION	Iodoacetamide w other Cys mods possible
RESULTS_SEARCH_10_PARAMETERS_PARAGON_METHOD_SETTINGS_UI_DIGESTION	Trypsin + Lys C
RESULTS_SEARCH_10_PARAMETERS_PARAGON_METHOD_SETTINGS_UI_SPECIAL_FACTOR	Gel-based ID
RESULTS_SEARCH_10_PARAMETERS_PARAGON_METHOD_SETTINGS_UI_INSTRUMENT	TripleTOF 6600
RESULTS_SEARCH_10_PARAMETERS_PARAGON_METHOD_SETTINGS_UI_SEARCH_EFFORT	Thorough
RESULTS_SEARCH_10_PARAMETERS_PARAGON_METHOD_SETTINGS_UI_USER_NAME	IMB-MASS02\massuser
RESULTS_SEARCH_10_PARAMETERS_PARAGON_METHOD_SETTINGS_UI_MACHINE_NAME	IMB-MASS02
RESULTS_SEARCH_10_PARAMETERS_PARAGON_METHOD_SETTINGS_UI_SEARCH_ID	6.37467e+17
RESULTS_SEARCH_10_PARAMETERS_PARAGON_METHOD_SETTINGS_UI_START_TIME	2021-01-19 16:06:38
RESULTS_SEARCH_10_PARAMETERS_PARAGON_METHOD_SETTINGS_UI_MIN_UNUSED_PROTSCORE	0.0458
RESULTS_SEARCH_10_PARAMETERS_PARAGON_METHOD_SETTINGS_UI_PSPEP	TRUE
RESULTS_SEARCH_11_time_cpu	218245
RESULTS_SEARCH_11_time_duration	286817
RESULTS_SEARCH_11_version	5.0.1.4874
RESULTS_SEARCH_11_xml:id	SEARCH:1:637466691961037774_5
RESULTS_SEARCH_11_PARAMETERS_chemical_data_edited	FALSE
RESULTS_SEARCH_11_PARAMETERS_do_multiprecursor_search	TRUE
RESULTS_SEARCH_11_PARAMETERS_do_reverse_search	TRUE
RESULTS_SEARCH_11_PARAMETERS_max_quant_labels	35
RESULTS_SEARCH_11_PARAMETERS_maxresults	15
RESULTS_SEARCH_11_PARAMETERS_separate_searches	FALSE
RESULTS_SEARCH_11_PARAMETERS_MSTOLERANCE_type	dalton
RESULTS_SEARCH_11_PARAMETERS_MSTOLERANCE_value	0.05
RESULTS_SEARCH_11_PARAMETERS_MSMSTOLERANCE_type	dalton
RESULTS_SEARCH_11_PARAMETERS_MSMSTOLERANCE_value	0.1
RESULTS_SEARCH_11_PARAMETERS_MS_STANDARD_DEVIATION_type	dalton
RESULTS_SEARCH_11_PARAMETERS_MS_STANDARD_DEVIATION_value	0.0011
RESULTS_SEARCH_11_PARAMETERS_MSMS_STANDARD_DEVIATION_type	dalton
RESULTS_SEARCH_11_PARAMETERS_MSMS_STANDARD_DEVIATION_value	0.01
RESULTS_SEARCH_11_PARAMETERS_FASTA_filename	C:\AB SCIEX\ProteinPilot Data\SearchDatabases\uniprot-zebrafish_with_Clover.fasta
RESULTS_SEARCH_11_PARAMETERS_AUTO_CALIBRATION_ms	TRUE
RESULTS_SEARCH_11_PARAMETERS_AUTO_CALIBRATION_msexport	FALSE
RESULTS_SEARCH_11_PARAMETERS_AUTO_CALIBRATION_msms	TRUE
RESULTS_SEARCH_11_PARAMETERS_AUTO_CALIBRATION_msmstolsdratio	2.75
RESULTS_SEARCH_11_PARAMETERS_AUTO_CALIBRATION_mstolsdratio	7
RESULTS_SEARCH_11_PARAMETERS_AUTO_CALIBRATION_squareroot	TRUE
RESULTS_SEARCH_11_PARAMETERS_AUTO_CALIBRATION_type	dalton
RESULTS_SEARCH_11_PARAMETERS_AUTO_CALIBRATION_MCP_d_s_s_f	0.0666667
RESULTS_SEARCH_11_PARAMETERS_AUTO_CALIBRATION_MCP_d_s_w_f	3
RESULTS_SEARCH_11_PARAMETERS_AUTO_CALIBRATION_MCP_m_f_r_mbc	200
RESULTS_SEARCH_11_PARAMETERS_AUTO_CALIBRATION_MCP_m_m_c	10
RESULTS_SEARCH_11_PARAMETERS_AUTO_CALIBRATION_MCP_m_m_f_s	0.25
RESULTS_SEARCH_11_PARAMETERS_AUTO_CALIBRATION_MCP_m_m_p_f	0.33
RESULTS_SEARCH_11_PARAMETERS_AUTO_CALIBRATION_MCP_m_m_p_rms_f	1
RESULTS_SEARCH_11_PARAMETERS_AUTO_CALIBRATION_MCP_m_p_t_f	1
RESULTS_SEARCH_11_PARAMETERS_AUTO_CALIBRATION_MCP_m_r_h_n_b	15
RESULTS_SEARCH_11_PARAMETERS_AUTO_CALIBRATION_MCP_m_z_n_s	99
RESULTS_SEARCH_11_PARAMETERS_AUTO_CALIBRATION_MCP_m_z_s_mn_f_r	0.0666667
RESULTS_SEARCH_11_PARAMETERS_AUTO_CALIBRATION_MCP_m_z_s_mx_f_r	0.1
RESULTS_SEARCH_11_PARAMETERS_MS_AUTO_CALIBRATION_OUT_avres	-1.17886e-10
RESULTS_SEARCH_11_PARAMETERS_MS_AUTO_CALIBRATION_OUT_c0	7.28879e-06
RESULTS_SEARCH_11_PARAMETERS_MS_AUTO_CALIBRATION_OUT_c1minus1	-1.36028e-06
RESULTS_SEARCH_11_PARAMETERS_MS_AUTO_CALIBRATION_OUT_c2	0
RESULTS_SEARCH_11_PARAMETERS_MS_AUTO_CALIBRATION_OUT_file	2
RESULTS_SEARCH_11_PARAMETERS_MS_AUTO_CALIBRATION_OUT_partnumber	6
RESULTS_SEARCH_11_PARAMETERS_MS_AUTO_CALIBRATION_OUT_polyorder	1
RESULTS_SEARCH_11_PARAMETERS_MS_AUTO_CALIBRATION_OUT_sample	1
RESULTS_SEARCH_11_PARAMETERS_MS_AUTO_CALIBRATION_OUT_squareroot	TRUE
RESULTS_SEARCH_11_PARAMETERS_MSMS_AUTO_CALIBRATION_OUT_avres	-5.05628e-08
RESULTS_SEARCH_11_PARAMETERS_MSMS_AUTO_CALIBRATION_OUT_c0	-1.0986e-05
RESULTS_SEARCH_11_PARAMETERS_MSMS_AUTO_CALIBRATION_OUT_c1minus1	-1.15266e-06
RESULTS_SEARCH_11_PARAMETERS_MSMS_AUTO_CALIBRATION_OUT_c2	0
RESULTS_SEARCH_11_PARAMETERS_MSMS_AUTO_CALIBRATION_OUT_file	2
RESULTS_SEARCH_11_PARAMETERS_MSMS_AUTO_CALIBRATION_OUT_partnumber	6
RESULTS_SEARCH_11_PARAMETERS_MSMS_AUTO_CALIBRATION_OUT_polyorder	1900-01-01
RESULTS_SEARCH_11_PARAMETERS_MSMS_AUTO_CALIBRATION_OUT_sample	1
RESULTS_SEARCH_11_PARAMETERS_MSMS_AUTO_CALIBRATION_OUT_squareroot	TRUE
RESULTS_SEARCH_11_PARAMETERS_MAX_PRECURSORS_FRAGLET	5
RESULTS_SEARCH_11_PARAMETERS_MAX_PRECURSORS_TAGLET	1
RESULTS_SEARCH_11_PARAMETERS_PRECURSORS_DR_FRAGLET	10
RESULTS_SEARCH_11_PARAMETERS_PRECURSORS_DR_TAGLET	3
RESULTS_SEARCH_11_PARAMETERS_DEFAULT_CHARGE_STATE_1_charge	2
RESULTS_SEARCH_11_PARAMETERS_DEFAULT_CHARGE_STATE_1_probability	1
RESULTS_SEARCH_11_PARAMETERS_DEFAULT_CHARGE_STATE_2_charge	3
RESULTS_SEARCH_11_PARAMETERS_DEFAULT_CHARGE_STATE_2_probability	1
RESULTS_SEARCH_11_PARAMETERS_DEFAULT_CHARGE_STATE_3_charge	4
RESULTS_SEARCH_11_PARAMETERS_DEFAULT_CHARGE_STATE_3_probability	1
RESULTS_SEARCH_11_PARAMETERS_VERSION	5.0.1.0, 4895
RESULTS_SEARCH_11_PARAMETERS_PARAGON_VERSION	5.0.1.0, 4874
RESULTS_SEARCH_11_PARAMETERS_APPLICATION	ProteinPilot(tm) Software
RESULTS_SEARCH_11_PARAMETERS_PROGROUP_alternativedispositionmaximumfoldprobabilitydrop	100
RESULTS_SEARCH_11_PARAMETERS_PROGROUP_alternativedispositionmaximumfoldscoredrop	2
RESULTS_SEARCH_11_PARAMETERS_PROGROUP_autodiscordantpeptidethreshold	0.3
RESULTS_SEARCH_11_PARAMETERS_PROGROUP_bayesconfidencecalclulation	TRUE
RESULTS_SEARCH_11_PARAMETERS_PROGROUP_calibrateconfidence	TRUE
RESULTS_SEARCH_11_PARAMETERS_PROGROUP_compresspeptides	FALSE
RESULTS_SEARCH_11_PARAMETERS_PROGROUP_confidencepercentthresholdforexcludingothersfromquant	15
RESULTS_SEARCH_11_PARAMETERS_PROGROUP_confidencepercentthresholdforincludingselfinquant	15
RESULTS_SEARCH_11_PARAMETERS_PROGROUP_donotstoremspeaklists	FALSE
RESULTS_SEARCH_11_PARAMETERS_PROGROUP_fasta	C:\AB SCIEX\ProteinPilot Data\SearchDatabases\uniprot-zebrafish_with_Clover.fasta
RESULTS_SEARCH_11_PARAMETERS_PROGROUP_featuregroupminpepconf	0.66
RESULTS_SEARCH_11_PARAMETERS_PROGROUP_featuregroupminups	0.47
RESULTS_SEARCH_11_PARAMETERS_PROGROUP_focusingintersection	4
RESULTS_SEARCH_11_PARAMETERS_PROGROUP_focusingminimummatchconfidence	0.1
RESULTS_SEARCH_11_PARAMETERS_PROGROUP_focusingminunusedprotscore	0.1
RESULTS_SEARCH_11_PARAMETERS_PROGROUP_focusingsubsetcutoff	1900-01-06
RESULTS_SEARCH_11_PARAMETERS_PROGROUP_intersection	1900-01-01 07:12:00
RESULTS_SEARCH_11_PARAMETERS_PROGROUP_minimummatchconfidencecutoff	0.001
RESULTS_SEARCH_11_PARAMETERS_PROGROUP_minunusedprotscore	0.0458
RESULTS_SEARCH_11_PARAMETERS_PROGROUP_subsetcutoff	2
RESULTS_SEARCH_11_PARAMETERS_PROGROUP_unusedprotscorethresholdforexcludingothersfromquant	1.3
RESULTS_SEARCH_11_PARAMETERS_PEAKLIST_count	3735
RESULTS_SEARCH_11_PARAMETERS_PEAKLIST_filenumber	2
RESULTS_SEARCH_11_PARAMETERS_PEAKLIST_original_count	3735
RESULTS_SEARCH_11_PARAMETERS_PEAKLIST_originalfilename	C:\AB SCIEX\ProteinPilot Data\Results\Albert\ZX 20200429 6600\ZX 20200429 6600 C 1A 2.wiff
RESULTS_SEARCH_11_PARAMETERS_PEAKLIST_partnumber	6
RESULTS_SEARCH_11_PARAMETERS_QUANT_TYPE_background_correction	FALSE
RESULTS_SEARCH_11_PARAMETERS_QUANT_TYPE_bias_correction	TRUE
RESULTS_SEARCH_11_PARAMETERS_QUANT_TYPE_keep_extreme_peptides_over_fraction	0
RESULTS_SEARCH_11_PARAMETERS_QUANT_TYPE_low_confidence_check	TRUE
RESULTS_SEARCH_11_PARAMETERS_QUANT_TYPE_low_intensity_check	TRUE
RESULTS_SEARCH_11_PARAMETERS_QUANT_TYPE_median_statistic	TRUE
RESULTS_SEARCH_11_PARAMETERS_QUANT_TYPE_mod_check	TRUE
RESULTS_SEARCH_11_PARAMETERS_QUANT_TYPE_quant_threshold	-1
RESULTS_SEARCH_11_PARAMETERS_QUANT_TYPE_quant_threshold_sn	9
RESULTS_SEARCH_11_PARAMETERS_QUANT_TYPE_separate_searches	FALSE
RESULTS_SEARCH_11_PARAMETERS_QUANT_TYPE_shared_msms_check	TRUE
RESULTS_SEARCH_11_PARAMETERS_PARAGON_METHOD_SETTINGS_UI_SAMPLE_TYPE	Identification
RESULTS_SEARCH_11_PARAMETERS_PARAGON_METHOD_SETTINGS_UI_CYS_ALKYLATION	Iodoacetamide w other Cys mods possible
RESULTS_SEARCH_11_PARAMETERS_PARAGON_METHOD_SETTINGS_UI_DIGESTION	Trypsin + Lys C
RESULTS_SEARCH_11_PARAMETERS_PARAGON_METHOD_SETTINGS_UI_SPECIAL_FACTOR	Gel-based ID
RESULTS_SEARCH_11_PARAMETERS_PARAGON_METHOD_SETTINGS_UI_INSTRUMENT	TripleTOF 6600
RESULTS_SEARCH_11_PARAMETERS_PARAGON_METHOD_SETTINGS_UI_SEARCH_EFFORT	Thorough
RESULTS_SEARCH_11_PARAMETERS_PARAGON_METHOD_SETTINGS_UI_USER_NAME	IMB-MASS02\massuser
RESULTS_SEARCH_11_PARAMETERS_PARAGON_METHOD_SETTINGS_UI_MACHINE_NAME	IMB-MASS02
RESULTS_SEARCH_11_PARAMETERS_PARAGON_METHOD_SETTINGS_UI_SEARCH_ID	6.37467e+17
RESULTS_SEARCH_11_PARAMETERS_PARAGON_METHOD_SETTINGS_UI_START_TIME	2021-01-19 16:06:38
RESULTS_SEARCH_11_PARAMETERS_PARAGON_METHOD_SETTINGS_UI_MIN_UNUSED_PROTSCORE	0.0458
RESULTS_SEARCH_11_PARAMETERS_PARAGON_METHOD_SETTINGS_UI_PSPEP	TRUE
RESULTS_SEARCH_12_time_cpu	271363
RESULTS_SEARCH_12_time_duration	374461
RESULTS_SEARCH_12_version	5.0.1.4874
RESULTS_SEARCH_12_xml:id	SEARCH:2:637466691961037774_5
RESULTS_SEARCH_12_PARAMETERS_chemical_data_edited	FALSE
RESULTS_SEARCH_12_PARAMETERS_do_multiprecursor_search	TRUE
RESULTS_SEARCH_12_PARAMETERS_do_reverse_search	TRUE
RESULTS_SEARCH_12_PARAMETERS_max_quant_labels	35
RESULTS_SEARCH_12_PARAMETERS_maxresults	1900-01-15
RESULTS_SEARCH_12_PARAMETERS_separate_searches	FALSE
RESULTS_SEARCH_12_PARAMETERS_MSTOLERANCE_type	dalton
RESULTS_SEARCH_12_PARAMETERS_MSTOLERANCE_value	0.05
RESULTS_SEARCH_12_PARAMETERS_MSMSTOLERANCE_type	dalton
RESULTS_SEARCH_12_PARAMETERS_MSMSTOLERANCE_value	0.1
RESULTS_SEARCH_12_PARAMETERS_MS_STANDARD_DEVIATION_type	dalton
RESULTS_SEARCH_12_PARAMETERS_MS_STANDARD_DEVIATION_value	0.0011
RESULTS_SEARCH_12_PARAMETERS_MSMS_STANDARD_DEVIATION_type	dalton
RESULTS_SEARCH_12_PARAMETERS_MSMS_STANDARD_DEVIATION_value	0.01
RESULTS_SEARCH_12_PARAMETERS_FASTA_filename	C:\AB SCIEX\ProteinPilot Data\SearchDatabases\uniprot-zebrafish_with_Clover.fasta
RESULTS_SEARCH_12_PARAMETERS_AUTO_CALIBRATION_ms	TRUE
RESULTS_SEARCH_12_PARAMETERS_AUTO_CALIBRATION_msexport	FALSE
RESULTS_SEARCH_12_PARAMETERS_AUTO_CALIBRATION_msms	TRUE
RESULTS_SEARCH_12_PARAMETERS_AUTO_CALIBRATION_msmstolsdratio	2.75
RESULTS_SEARCH_12_PARAMETERS_AUTO_CALIBRATION_mstolsdratio	7
RESULTS_SEARCH_12_PARAMETERS_AUTO_CALIBRATION_squareroot	TRUE
RESULTS_SEARCH_12_PARAMETERS_AUTO_CALIBRATION_type	dalton
RESULTS_SEARCH_12_PARAMETERS_AUTO_CALIBRATION_MCP_d_s_s_f	0.0666667
RESULTS_SEARCH_12_PARAMETERS_AUTO_CALIBRATION_MCP_d_s_w_f	3
RESULTS_SEARCH_12_PARAMETERS_AUTO_CALIBRATION_MCP_m_f_r_mbc	200
RESULTS_SEARCH_12_PARAMETERS_AUTO_CALIBRATION_MCP_m_m_c	10
RESULTS_SEARCH_12_PARAMETERS_AUTO_CALIBRATION_MCP_m_m_f_s	0.25
RESULTS_SEARCH_12_PARAMETERS_AUTO_CALIBRATION_MCP_m_m_p_f	0.33
RESULTS_SEARCH_12_PARAMETERS_AUTO_CALIBRATION_MCP_m_m_p_rms_f	1
RESULTS_SEARCH_12_PARAMETERS_AUTO_CALIBRATION_MCP_m_p_t_f	1
RESULTS_SEARCH_12_PARAMETERS_AUTO_CALIBRATION_MCP_m_r_h_n_b	15
RESULTS_SEARCH_12_PARAMETERS_AUTO_CALIBRATION_MCP_m_z_n_s	99
RESULTS_SEARCH_12_PARAMETERS_AUTO_CALIBRATION_MCP_m_z_s_mn_f_r	0.0666667
RESULTS_SEARCH_12_PARAMETERS_AUTO_CALIBRATION_MCP_m_z_s_mx_f_r	0.1
RESULTS_SEARCH_12_PARAMETERS_MS_AUTO_CALIBRATION_OUT_avres	-1.17886e-10
RESULTS_SEARCH_12_PARAMETERS_MS_AUTO_CALIBRATION_OUT_c0	7.28879e-06
RESULTS_SEARCH_12_PARAMETERS_MS_AUTO_CALIBRATION_OUT_c1minus1	-1.36028e-06
RESULTS_SEARCH_12_PARAMETERS_MS_AUTO_CALIBRATION_OUT_c2	0
RESULTS_SEARCH_12_PARAMETERS_MS_AUTO_CALIBRATION_OUT_file	2
RESULTS_SEARCH_12_PARAMETERS_MS_AUTO_CALIBRATION_OUT_partnumber	6
RESULTS_SEARCH_12_PARAMETERS_MS_AUTO_CALIBRATION_OUT_polyorder	1
RESULTS_SEARCH_12_PARAMETERS_MS_AUTO_CALIBRATION_OUT_sample	1
RESULTS_SEARCH_12_PARAMETERS_MS_AUTO_CALIBRATION_OUT_squareroot	TRUE
RESULTS_SEARCH_12_PARAMETERS_MSMS_AUTO_CALIBRATION_OUT_avres	-5.05628e-08
RESULTS_SEARCH_12_PARAMETERS_MSMS_AUTO_CALIBRATION_OUT_c0	-1.0986e-05
RESULTS_SEARCH_12_PARAMETERS_MSMS_AUTO_CALIBRATION_OUT_c1minus1	-1.15266e-06
RESULTS_SEARCH_12_PARAMETERS_MSMS_AUTO_CALIBRATION_OUT_c2	0
RESULTS_SEARCH_12_PARAMETERS_MSMS_AUTO_CALIBRATION_OUT_file	2
RESULTS_SEARCH_12_PARAMETERS_MSMS_AUTO_CALIBRATION_OUT_partnumber	6
RESULTS_SEARCH_12_PARAMETERS_MSMS_AUTO_CALIBRATION_OUT_polyorder	1
RESULTS_SEARCH_12_PARAMETERS_MSMS_AUTO_CALIBRATION_OUT_sample	1
RESULTS_SEARCH_12_PARAMETERS_MSMS_AUTO_CALIBRATION_OUT_squareroot	TRUE
RESULTS_SEARCH_12_PARAMETERS_MAX_PRECURSORS_FRAGLET	5
RESULTS_SEARCH_12_PARAMETERS_MAX_PRECURSORS_TAGLET	1
RESULTS_SEARCH_12_PARAMETERS_PRECURSORS_DR_FRAGLET	10
RESULTS_SEARCH_12_PARAMETERS_PRECURSORS_DR_TAGLET	3
RESULTS_SEARCH_12_PARAMETERS_DEFAULT_CHARGE_STATE_1_charge	2
RESULTS_SEARCH_12_PARAMETERS_DEFAULT_CHARGE_STATE_1_probability	1
RESULTS_SEARCH_12_PARAMETERS_DEFAULT_CHARGE_STATE_2_charge	3
RESULTS_SEARCH_12_PARAMETERS_DEFAULT_CHARGE_STATE_2_probability	1
RESULTS_SEARCH_12_PARAMETERS_DEFAULT_CHARGE_STATE_3_charge	4
RESULTS_SEARCH_12_PARAMETERS_DEFAULT_CHARGE_STATE_3_probability	1
RESULTS_SEARCH_12_PARAMETERS_VERSION	5.0.1.0, 4895
RESULTS_SEARCH_12_PARAMETERS_PARAGON_VERSION	5.0.1.0, 4874
RESULTS_SEARCH_12_PARAMETERS_APPLICATION	ProteinPilot(tm) Software
RESULTS_SEARCH_12_PARAMETERS_PROGROUP_alternativedispositionmaximumfoldprobabilitydrop	100
RESULTS_SEARCH_12_PARAMETERS_PROGROUP_alternativedispositionmaximumfoldscoredrop	2
RESULTS_SEARCH_12_PARAMETERS_PROGROUP_autodiscordantpeptidethreshold	0.3
RESULTS_SEARCH_12_PARAMETERS_PROGROUP_bayesconfidencecalclulation	TRUE
RESULTS_SEARCH_12_PARAMETERS_PROGROUP_calibrateconfidence	TRUE
RESULTS_SEARCH_12_PARAMETERS_PROGROUP_compresspeptides	FALSE
RESULTS_SEARCH_12_PARAMETERS_PROGROUP_confidencepercentthresholdforexcludingothersfromquant	1900-01-15
RESULTS_SEARCH_12_PARAMETERS_PROGROUP_confidencepercentthresholdforincludingselfinquant	15
RESULTS_SEARCH_12_PARAMETERS_PROGROUP_donotstoremspeaklists	FALSE
RESULTS_SEARCH_12_PARAMETERS_PROGROUP_fasta	C:\AB SCIEX\ProteinPilot Data\SearchDatabases\uniprot-zebrafish_with_Clover.fasta
RESULTS_SEARCH_12_PARAMETERS_PROGROUP_featuregroupminpepconf	0.66
RESULTS_SEARCH_12_PARAMETERS_PROGROUP_featuregroupminups	0.47
RESULTS_SEARCH_12_PARAMETERS_PROGROUP_focusingintersection	4
RESULTS_SEARCH_12_PARAMETERS_PROGROUP_focusingminimummatchconfidence	0.1
RESULTS_SEARCH_12_PARAMETERS_PROGROUP_focusingminunusedprotscore	0.1
RESULTS_SEARCH_12_PARAMETERS_PROGROUP_focusingsubsetcutoff	6
RESULTS_SEARCH_12_PARAMETERS_PROGROUP_intersection	1.3
RESULTS_SEARCH_12_PARAMETERS_PROGROUP_minimummatchconfidencecutoff	0.001
RESULTS_SEARCH_12_PARAMETERS_PROGROUP_minunusedprotscore	0.0458
RESULTS_SEARCH_12_PARAMETERS_PROGROUP_subsetcutoff	2
RESULTS_SEARCH_12_PARAMETERS_PROGROUP_unusedprotscorethresholdforexcludingothersfromquant	1.3
RESULTS_SEARCH_12_PARAMETERS_PEAKLIST_count	3735
RESULTS_SEARCH_12_PARAMETERS_PEAKLIST_filenumber	2
RESULTS_SEARCH_12_PARAMETERS_PEAKLIST_original_count	3735
RESULTS_SEARCH_12_PARAMETERS_PEAKLIST_originalfilename	C:\AB SCIEX\ProteinPilot Data\Results\Albert\ZX 20200429 6600\ZX 20200429 6600 C 1A 2.wiff
RESULTS_SEARCH_12_PARAMETERS_PEAKLIST_partnumber	6
RESULTS_SEARCH_12_PARAMETERS_QUANT_TYPE_background_correction	FALSE
RESULTS_SEARCH_12_PARAMETERS_QUANT_TYPE_bias_correction	TRUE
RESULTS_SEARCH_12_PARAMETERS_QUANT_TYPE_keep_extreme_peptides_over_fraction	0
RESULTS_SEARCH_12_PARAMETERS_QUANT_TYPE_low_confidence_check	TRUE
RESULTS_SEARCH_12_PARAMETERS_QUANT_TYPE_low_intensity_check	TRUE
RESULTS_SEARCH_12_PARAMETERS_QUANT_TYPE_median_statistic	TRUE
RESULTS_SEARCH_12_PARAMETERS_QUANT_TYPE_mod_check	TRUE
RESULTS_SEARCH_12_PARAMETERS_QUANT_TYPE_quant_threshold	-1
RESULTS_SEARCH_12_PARAMETERS_QUANT_TYPE_quant_threshold_sn	1900-01-09
RESULTS_SEARCH_12_PARAMETERS_QUANT_TYPE_separate_searches	FALSE
RESULTS_SEARCH_12_PARAMETERS_QUANT_TYPE_shared_msms_check	TRUE
RESULTS_SEARCH_12_PARAMETERS_PARAGON_METHOD_SETTINGS_UI_SAMPLE_TYPE	Identification
RESULTS_SEARCH_12_PARAMETERS_PARAGON_METHOD_SETTINGS_UI_CYS_ALKYLATION	Iodoacetamide w other Cys mods possible
RESULTS_SEARCH_12_PARAMETERS_PARAGON_METHOD_SETTINGS_UI_DIGESTION	Trypsin + Lys C
RESULTS_SEARCH_12_PARAMETERS_PARAGON_METHOD_SETTINGS_UI_SPECIAL_FACTOR	Gel-based ID
RESULTS_SEARCH_12_PARAMETERS_PARAGON_METHOD_SETTINGS_UI_INSTRUMENT	TripleTOF 6600
RESULTS_SEARCH_12_PARAMETERS_PARAGON_METHOD_SETTINGS_UI_SEARCH_EFFORT	Thorough
RESULTS_SEARCH_12_PARAMETERS_PARAGON_METHOD_SETTINGS_UI_USER_NAME	IMB-MASS02\massuser
RESULTS_SEARCH_12_PARAMETERS_PARAGON_METHOD_SETTINGS_UI_MACHINE_NAME	IMB-MASS02
RESULTS_SEARCH_12_PARAMETERS_PARAGON_METHOD_SETTINGS_UI_SEARCH_ID	6.37467e+17
RESULTS_SEARCH_12_PARAMETERS_PARAGON_METHOD_SETTINGS_UI_START_TIME	2021-01-19 16:06:38
RESULTS_SEARCH_12_PARAMETERS_PARAGON_METHOD_SETTINGS_UI_MIN_UNUSED_PROTSCORE	0.0458
RESULTS_SEARCH_12_PARAMETERS_PARAGON_METHOD_SETTINGS_UI_PSPEP	TRUE
RESULTS_SEARCH_13_time_cpu	255358
RESULTS_SEARCH_13_time_duration	384398
RESULTS_SEARCH_13_version	5.0.1.4874
RESULTS_SEARCH_13_xml:id	SEARCH:1:637466691961037774_6
RESULTS_SEARCH_13_PARAMETERS_chemical_data_edited	FALSE
RESULTS_SEARCH_13_PARAMETERS_do_multiprecursor_search	TRUE
RESULTS_SEARCH_13_PARAMETERS_do_reverse_search	TRUE
RESULTS_SEARCH_13_PARAMETERS_max_quant_labels	35
RESULTS_SEARCH_13_PARAMETERS_maxresults	15
RESULTS_SEARCH_13_PARAMETERS_separate_searches	FALSE
RESULTS_SEARCH_13_PARAMETERS_MSTOLERANCE_type	dalton
RESULTS_SEARCH_13_PARAMETERS_MSTOLERANCE_value	0.05
RESULTS_SEARCH_13_PARAMETERS_MSMSTOLERANCE_type	dalton
RESULTS_SEARCH_13_PARAMETERS_MSMSTOLERANCE_value	0.1
RESULTS_SEARCH_13_PARAMETERS_MS_STANDARD_DEVIATION_type	dalton
RESULTS_SEARCH_13_PARAMETERS_MS_STANDARD_DEVIATION_value	0.0011
RESULTS_SEARCH_13_PARAMETERS_MSMS_STANDARD_DEVIATION_type	dalton
RESULTS_SEARCH_13_PARAMETERS_MSMS_STANDARD_DEVIATION_value	0.01
RESULTS_SEARCH_13_PARAMETERS_FASTA_filename	C:\AB SCIEX\ProteinPilot Data\SearchDatabases\uniprot-zebrafish_with_Clover.fasta
RESULTS_SEARCH_13_PARAMETERS_AUTO_CALIBRATION_ms	TRUE
RESULTS_SEARCH_13_PARAMETERS_AUTO_CALIBRATION_msexport	FALSE
RESULTS_SEARCH_13_PARAMETERS_AUTO_CALIBRATION_msms	TRUE
RESULTS_SEARCH_13_PARAMETERS_AUTO_CALIBRATION_msmstolsdratio	2.75
RESULTS_SEARCH_13_PARAMETERS_AUTO_CALIBRATION_mstolsdratio	7
RESULTS_SEARCH_13_PARAMETERS_AUTO_CALIBRATION_squareroot	TRUE
RESULTS_SEARCH_13_PARAMETERS_AUTO_CALIBRATION_type	dalton
RESULTS_SEARCH_13_PARAMETERS_AUTO_CALIBRATION_MCP_d_s_s_f	0.0666667
RESULTS_SEARCH_13_PARAMETERS_AUTO_CALIBRATION_MCP_d_s_w_f	3
RESULTS_SEARCH_13_PARAMETERS_AUTO_CALIBRATION_MCP_m_f_r_mbc	200
RESULTS_SEARCH_13_PARAMETERS_AUTO_CALIBRATION_MCP_m_m_c	10
RESULTS_SEARCH_13_PARAMETERS_AUTO_CALIBRATION_MCP_m_m_f_s	0.25
RESULTS_SEARCH_13_PARAMETERS_AUTO_CALIBRATION_MCP_m_m_p_f	0.33
RESULTS_SEARCH_13_PARAMETERS_AUTO_CALIBRATION_MCP_m_m_p_rms_f	1
RESULTS_SEARCH_13_PARAMETERS_AUTO_CALIBRATION_MCP_m_p_t_f	1
RESULTS_SEARCH_13_PARAMETERS_AUTO_CALIBRATION_MCP_m_r_h_n_b	15
RESULTS_SEARCH_13_PARAMETERS_AUTO_CALIBRATION_MCP_m_z_n_s	99
RESULTS_SEARCH_13_PARAMETERS_AUTO_CALIBRATION_MCP_m_z_s_mn_f_r	0.0666667
RESULTS_SEARCH_13_PARAMETERS_AUTO_CALIBRATION_MCP_m_z_s_mx_f_r	0.1
RESULTS_SEARCH_13_PARAMETERS_MS_AUTO_CALIBRATION_OUT_avres	-2.06559e-10
RESULTS_SEARCH_13_PARAMETERS_MS_AUTO_CALIBRATION_OUT_c0	1.24309e-05
RESULTS_SEARCH_13_PARAMETERS_MS_AUTO_CALIBRATION_OUT_c1minus1	-1.13929e-06
RESULTS_SEARCH_13_PARAMETERS_MS_AUTO_CALIBRATION_OUT_c2	0
RESULTS_SEARCH_13_PARAMETERS_MS_AUTO_CALIBRATION_OUT_file	2
RESULTS_SEARCH_13_PARAMETERS_MS_AUTO_CALIBRATION_OUT_partnumber	7
RESULTS_SEARCH_13_PARAMETERS_MS_AUTO_CALIBRATION_OUT_polyorder	1
RESULTS_SEARCH_13_PARAMETERS_MS_AUTO_CALIBRATION_OUT_sample	1
RESULTS_SEARCH_13_PARAMETERS_MS_AUTO_CALIBRATION_OUT_squareroot	TRUE
RESULTS_SEARCH_13_PARAMETERS_MSMS_AUTO_CALIBRATION_OUT_avres	4.33036e-08
RESULTS_SEARCH_13_PARAMETERS_MSMS_AUTO_CALIBRATION_OUT_c0	6.25577e-06
RESULTS_SEARCH_13_PARAMETERS_MSMS_AUTO_CALIBRATION_OUT_c1minus1	-1.48265e-06
RESULTS_SEARCH_13_PARAMETERS_MSMS_AUTO_CALIBRATION_OUT_c2	0
RESULTS_SEARCH_13_PARAMETERS_MSMS_AUTO_CALIBRATION_OUT_file	2
RESULTS_SEARCH_13_PARAMETERS_MSMS_AUTO_CALIBRATION_OUT_partnumber	7
RESULTS_SEARCH_13_PARAMETERS_MSMS_AUTO_CALIBRATION_OUT_polyorder	1
RESULTS_SEARCH_13_PARAMETERS_MSMS_AUTO_CALIBRATION_OUT_sample	1
RESULTS_SEARCH_13_PARAMETERS_MSMS_AUTO_CALIBRATION_OUT_squareroot	TRUE
RESULTS_SEARCH_13_PARAMETERS_MAX_PRECURSORS_FRAGLET	5
RESULTS_SEARCH_13_PARAMETERS_MAX_PRECURSORS_TAGLET	1
RESULTS_SEARCH_13_PARAMETERS_PRECURSORS_DR_FRAGLET	10
RESULTS_SEARCH_13_PARAMETERS_PRECURSORS_DR_TAGLET	3
RESULTS_SEARCH_13_PARAMETERS_DEFAULT_CHARGE_STATE_1_charge	2
RESULTS_SEARCH_13_PARAMETERS_DEFAULT_CHARGE_STATE_1_probability	1
RESULTS_SEARCH_13_PARAMETERS_DEFAULT_CHARGE_STATE_2_charge	3
RESULTS_SEARCH_13_PARAMETERS_DEFAULT_CHARGE_STATE_2_probability	1
RESULTS_SEARCH_13_PARAMETERS_DEFAULT_CHARGE_STATE_3_charge	4
RESULTS_SEARCH_13_PARAMETERS_DEFAULT_CHARGE_STATE_3_probability	1
RESULTS_SEARCH_13_PARAMETERS_VERSION	5.0.1.0, 4895
RESULTS_SEARCH_13_PARAMETERS_PARAGON_VERSION	5.0.1.0, 4874
RESULTS_SEARCH_13_PARAMETERS_APPLICATION	ProteinPilot(tm) Software
RESULTS_SEARCH_13_PARAMETERS_PROGROUP_alternativedispositionmaximumfoldprobabilitydrop	100
RESULTS_SEARCH_13_PARAMETERS_PROGROUP_alternativedispositionmaximumfoldscoredrop	2
RESULTS_SEARCH_13_PARAMETERS_PROGROUP_autodiscordantpeptidethreshold	0.3
RESULTS_SEARCH_13_PARAMETERS_PROGROUP_bayesconfidencecalclulation	TRUE
RESULTS_SEARCH_13_PARAMETERS_PROGROUP_calibrateconfidence	TRUE
RESULTS_SEARCH_13_PARAMETERS_PROGROUP_compresspeptides	FALSE
RESULTS_SEARCH_13_PARAMETERS_PROGROUP_confidencepercentthresholdforexcludingothersfromquant	15
RESULTS_SEARCH_13_PARAMETERS_PROGROUP_confidencepercentthresholdforincludingselfinquant	15
RESULTS_SEARCH_13_PARAMETERS_PROGROUP_donotstoremspeaklists	FALSE
RESULTS_SEARCH_13_PARAMETERS_PROGROUP_fasta	C:\AB SCIEX\ProteinPilot Data\SearchDatabases\uniprot-zebrafish_with_Clover.fasta
RESULTS_SEARCH_13_PARAMETERS_PROGROUP_featuregroupminpepconf	0.66
RESULTS_SEARCH_13_PARAMETERS_PROGROUP_featuregroupminups	0.47
RESULTS_SEARCH_13_PARAMETERS_PROGROUP_focusingintersection	4
RESULTS_SEARCH_13_PARAMETERS_PROGROUP_focusingminimummatchconfidence	0.1
RESULTS_SEARCH_13_PARAMETERS_PROGROUP_focusingminunusedprotscore	0.1
RESULTS_SEARCH_13_PARAMETERS_PROGROUP_focusingsubsetcutoff	6
RESULTS_SEARCH_13_PARAMETERS_PROGROUP_intersection	1.3
RESULTS_SEARCH_13_PARAMETERS_PROGROUP_minimummatchconfidencecutoff	0.001
RESULTS_SEARCH_13_PARAMETERS_PROGROUP_minunusedprotscore	0.0458
RESULTS_SEARCH_13_PARAMETERS_PROGROUP_subsetcutoff	2
RESULTS_SEARCH_13_PARAMETERS_PROGROUP_unusedprotscorethresholdforexcludingothersfromquant	1.3
RESULTS_SEARCH_13_PARAMETERS_PEAKLIST_count	3729
RESULTS_SEARCH_13_PARAMETERS_PEAKLIST_filenumber	2
RESULTS_SEARCH_13_PARAMETERS_PEAKLIST_original_count	3729
RESULTS_SEARCH_13_PARAMETERS_PEAKLIST_originalfilename	C:\AB SCIEX\ProteinPilot Data\Results\Albert\ZX 20200429 6600\ZX 20200429 6600 C 1A 2.wiff
RESULTS_SEARCH_13_PARAMETERS_PEAKLIST_partnumber	7
RESULTS_SEARCH_13_PARAMETERS_QUANT_TYPE_background_correction	FALSE
RESULTS_SEARCH_13_PARAMETERS_QUANT_TYPE_bias_correction	TRUE
RESULTS_SEARCH_13_PARAMETERS_QUANT_TYPE_keep_extreme_peptides_over_fraction	00:00:00
RESULTS_SEARCH_13_PARAMETERS_QUANT_TYPE_low_confidence_check	TRUE
RESULTS_SEARCH_13_PARAMETERS_QUANT_TYPE_low_intensity_check	TRUE
RESULTS_SEARCH_13_PARAMETERS_QUANT_TYPE_median_statistic	TRUE
RESULTS_SEARCH_13_PARAMETERS_QUANT_TYPE_mod_check	TRUE
RESULTS_SEARCH_13_PARAMETERS_QUANT_TYPE_quant_threshold	1899-12-29
RESULTS_SEARCH_13_PARAMETERS_QUANT_TYPE_quant_threshold_sn	9
RESULTS_SEARCH_13_PARAMETERS_QUANT_TYPE_separate_searches	FALSE
RESULTS_SEARCH_13_PARAMETERS_QUANT_TYPE_shared_msms_check	TRUE
RESULTS_SEARCH_13_PARAMETERS_PARAGON_METHOD_SETTINGS_UI_SAMPLE_TYPE	Identification
RESULTS_SEARCH_13_PARAMETERS_PARAGON_METHOD_SETTINGS_UI_CYS_ALKYLATION	Iodoacetamide w other Cys mods possible
RESULTS_SEARCH_13_PARAMETERS_PARAGON_METHOD_SETTINGS_UI_DIGESTION	Trypsin + Lys C
RESULTS_SEARCH_13_PARAMETERS_PARAGON_METHOD_SETTINGS_UI_SPECIAL_FACTOR	Gel-based ID
RESULTS_SEARCH_13_PARAMETERS_PARAGON_METHOD_SETTINGS_UI_INSTRUMENT	TripleTOF 6600
RESULTS_SEARCH_13_PARAMETERS_PARAGON_METHOD_SETTINGS_UI_SEARCH_EFFORT	Thorough
RESULTS_SEARCH_13_PARAMETERS_PARAGON_METHOD_SETTINGS_UI_USER_NAME	IMB-MASS02\massuser
RESULTS_SEARCH_13_PARAMETERS_PARAGON_METHOD_SETTINGS_UI_MACHINE_NAME	IMB-MASS02
RESULTS_SEARCH_13_PARAMETERS_PARAGON_METHOD_SETTINGS_UI_SEARCH_ID	6.37467e+17
RESULTS_SEARCH_13_PARAMETERS_PARAGON_METHOD_SETTINGS_UI_START_TIME	2021-01-19 16:06:38
RESULTS_SEARCH_13_PARAMETERS_PARAGON_METHOD_SETTINGS_UI_MIN_UNUSED_PROTSCORE	0.0458
RESULTS_SEARCH_13_PARAMETERS_PARAGON_METHOD_SETTINGS_UI_PSPEP	TRUE
RESULTS_SEARCH_14_time_cpu	422856
RESULTS_SEARCH_14_time_duration	501278
RESULTS_SEARCH_14_version	5.0.1.4874
RESULTS_SEARCH_14_xml:id	SEARCH:2:637466691961037774_6
RESULTS_SEARCH_14_PARAMETERS_chemical_data_edited	FALSE
RESULTS_SEARCH_14_PARAMETERS_do_multiprecursor_search	TRUE
RESULTS_SEARCH_14_PARAMETERS_do_reverse_search	TRUE
RESULTS_SEARCH_14_PARAMETERS_max_quant_labels	35
RESULTS_SEARCH_14_PARAMETERS_maxresults	15
RESULTS_SEARCH_14_PARAMETERS_separate_searches	FALSE
RESULTS_SEARCH_14_PARAMETERS_MSTOLERANCE_type	dalton
RESULTS_SEARCH_14_PARAMETERS_MSTOLERANCE_value	0.05
RESULTS_SEARCH_14_PARAMETERS_MSMSTOLERANCE_type	dalton
RESULTS_SEARCH_14_PARAMETERS_MSMSTOLERANCE_value	0.1
RESULTS_SEARCH_14_PARAMETERS_MS_STANDARD_DEVIATION_type	dalton
RESULTS_SEARCH_14_PARAMETERS_MS_STANDARD_DEVIATION_value	0.0011
RESULTS_SEARCH_14_PARAMETERS_MSMS_STANDARD_DEVIATION_type	dalton
RESULTS_SEARCH_14_PARAMETERS_MSMS_STANDARD_DEVIATION_value	0.01
RESULTS_SEARCH_14_PARAMETERS_FASTA_filename	C:\AB SCIEX\ProteinPilot Data\SearchDatabases\uniprot-zebrafish_with_Clover.fasta
RESULTS_SEARCH_14_PARAMETERS_AUTO_CALIBRATION_ms	TRUE
RESULTS_SEARCH_14_PARAMETERS_AUTO_CALIBRATION_msexport	FALSE
RESULTS_SEARCH_14_PARAMETERS_AUTO_CALIBRATION_msms	TRUE
RESULTS_SEARCH_14_PARAMETERS_AUTO_CALIBRATION_msmstolsdratio	2.75
RESULTS_SEARCH_14_PARAMETERS_AUTO_CALIBRATION_mstolsdratio	7
RESULTS_SEARCH_14_PARAMETERS_AUTO_CALIBRATION_squareroot	TRUE
RESULTS_SEARCH_14_PARAMETERS_AUTO_CALIBRATION_type	dalton
RESULTS_SEARCH_14_PARAMETERS_AUTO_CALIBRATION_MCP_d_s_s_f	0.0666667
RESULTS_SEARCH_14_PARAMETERS_AUTO_CALIBRATION_MCP_d_s_w_f	3
RESULTS_SEARCH_14_PARAMETERS_AUTO_CALIBRATION_MCP_m_f_r_mbc	200
RESULTS_SEARCH_14_PARAMETERS_AUTO_CALIBRATION_MCP_m_m_c	10
RESULTS_SEARCH_14_PARAMETERS_AUTO_CALIBRATION_MCP_m_m_f_s	0.25
RESULTS_SEARCH_14_PARAMETERS_AUTO_CALIBRATION_MCP_m_m_p_f	0.33
RESULTS_SEARCH_14_PARAMETERS_AUTO_CALIBRATION_MCP_m_m_p_rms_f	1
RESULTS_SEARCH_14_PARAMETERS_AUTO_CALIBRATION_MCP_m_p_t_f	1
RESULTS_SEARCH_14_PARAMETERS_AUTO_CALIBRATION_MCP_m_r_h_n_b	15
RESULTS_SEARCH_14_PARAMETERS_AUTO_CALIBRATION_MCP_m_z_n_s	99
RESULTS_SEARCH_14_PARAMETERS_AUTO_CALIBRATION_MCP_m_z_s_mn_f_r	0.0666667
RESULTS_SEARCH_14_PARAMETERS_AUTO_CALIBRATION_MCP_m_z_s_mx_f_r	0.1
RESULTS_SEARCH_14_PARAMETERS_MS_AUTO_CALIBRATION_OUT_avres	-2.06559e-10
RESULTS_SEARCH_14_PARAMETERS_MS_AUTO_CALIBRATION_OUT_c0	1.24309e-05
RESULTS_SEARCH_14_PARAMETERS_MS_AUTO_CALIBRATION_OUT_c1minus1	-1.13929e-06
RESULTS_SEARCH_14_PARAMETERS_MS_AUTO_CALIBRATION_OUT_c2	0
RESULTS_SEARCH_14_PARAMETERS_MS_AUTO_CALIBRATION_OUT_file	2
RESULTS_SEARCH_14_PARAMETERS_MS_AUTO_CALIBRATION_OUT_partnumber	7
RESULTS_SEARCH_14_PARAMETERS_MS_AUTO_CALIBRATION_OUT_polyorder	1
RESULTS_SEARCH_14_PARAMETERS_MS_AUTO_CALIBRATION_OUT_sample	1
RESULTS_SEARCH_14_PARAMETERS_MS_AUTO_CALIBRATION_OUT_squareroot	TRUE
RESULTS_SEARCH_14_PARAMETERS_MSMS_AUTO_CALIBRATION_OUT_avres	4.33036e-08
RESULTS_SEARCH_14_PARAMETERS_MSMS_AUTO_CALIBRATION_OUT_c0	6.25577e-06
RESULTS_SEARCH_14_PARAMETERS_MSMS_AUTO_CALIBRATION_OUT_c1minus1	-1.48265e-06
RESULTS_SEARCH_14_PARAMETERS_MSMS_AUTO_CALIBRATION_OUT_c2	0
RESULTS_SEARCH_14_PARAMETERS_MSMS_AUTO_CALIBRATION_OUT_file	2
RESULTS_SEARCH_14_PARAMETERS_MSMS_AUTO_CALIBRATION_OUT_partnumber	7
RESULTS_SEARCH_14_PARAMETERS_MSMS_AUTO_CALIBRATION_OUT_polyorder	1
RESULTS_SEARCH_14_PARAMETERS_MSMS_AUTO_CALIBRATION_OUT_sample	1
RESULTS_SEARCH_14_PARAMETERS_MSMS_AUTO_CALIBRATION_OUT_squareroot	TRUE
RESULTS_SEARCH_14_PARAMETERS_MAX_PRECURSORS_FRAGLET	5
RESULTS_SEARCH_14_PARAMETERS_MAX_PRECURSORS_TAGLET	1
RESULTS_SEARCH_14_PARAMETERS_PRECURSORS_DR_FRAGLET	10
RESULTS_SEARCH_14_PARAMETERS_PRECURSORS_DR_TAGLET	3
RESULTS_SEARCH_14_PARAMETERS_DEFAULT_CHARGE_STATE_1_charge	2
RESULTS_SEARCH_14_PARAMETERS_DEFAULT_CHARGE_STATE_1_probability	1
RESULTS_SEARCH_14_PARAMETERS_DEFAULT_CHARGE_STATE_2_charge	3
RESULTS_SEARCH_14_PARAMETERS_DEFAULT_CHARGE_STATE_2_probability	1
RESULTS_SEARCH_14_PARAMETERS_DEFAULT_CHARGE_STATE_3_charge	4
RESULTS_SEARCH_14_PARAMETERS_DEFAULT_CHARGE_STATE_3_probability	1
RESULTS_SEARCH_14_PARAMETERS_VERSION	5.0.1.0, 4895
RESULTS_SEARCH_14_PARAMETERS_PARAGON_VERSION	5.0.1.0, 4874
RESULTS_SEARCH_14_PARAMETERS_APPLICATION	ProteinPilot(tm) Software
RESULTS_SEARCH_14_PARAMETERS_PROGROUP_alternativedispositionmaximumfoldprobabilitydrop	100
RESULTS_SEARCH_14_PARAMETERS_PROGROUP_alternativedispositionmaximumfoldscoredrop	2
RESULTS_SEARCH_14_PARAMETERS_PROGROUP_autodiscordantpeptidethreshold	0.3
RESULTS_SEARCH_14_PARAMETERS_PROGROUP_bayesconfidencecalclulation	TRUE
RESULTS_SEARCH_14_PARAMETERS_PROGROUP_calibrateconfidence	TRUE
RESULTS_SEARCH_14_PARAMETERS_PROGROUP_compresspeptides	FALSE
RESULTS_SEARCH_14_PARAMETERS_PROGROUP_confidencepercentthresholdforexcludingothersfromquant	15
RESULTS_SEARCH_14_PARAMETERS_PROGROUP_confidencepercentthresholdforincludingselfinquant	15
RESULTS_SEARCH_14_PARAMETERS_PROGROUP_donotstoremspeaklists	FALSE
RESULTS_SEARCH_14_PARAMETERS_PROGROUP_fasta	C:\AB SCIEX\ProteinPilot Data\SearchDatabases\uniprot-zebrafish_with_Clover.fasta
RESULTS_SEARCH_14_PARAMETERS_PROGROUP_featuregroupminpepconf	0.66
RESULTS_SEARCH_14_PARAMETERS_PROGROUP_featuregroupminups	0.47
RESULTS_SEARCH_14_PARAMETERS_PROGROUP_focusingintersection	4
RESULTS_SEARCH_14_PARAMETERS_PROGROUP_focusingminimummatchconfidence	0.1
RESULTS_SEARCH_14_PARAMETERS_PROGROUP_focusingminunusedprotscore	0.1
RESULTS_SEARCH_14_PARAMETERS_PROGROUP_focusingsubsetcutoff	6
RESULTS_SEARCH_14_PARAMETERS_PROGROUP_intersection	1.3
RESULTS_SEARCH_14_PARAMETERS_PROGROUP_minimummatchconfidencecutoff	0.001
RESULTS_SEARCH_14_PARAMETERS_PROGROUP_minunusedprotscore	0.0458
RESULTS_SEARCH_14_PARAMETERS_PROGROUP_subsetcutoff	2
RESULTS_SEARCH_14_PARAMETERS_PROGROUP_unusedprotscorethresholdforexcludingothersfromquant	1.3
RESULTS_SEARCH_14_PARAMETERS_PEAKLIST_count	3729
RESULTS_SEARCH_14_PARAMETERS_PEAKLIST_filenumber	2
RESULTS_SEARCH_14_PARAMETERS_PEAKLIST_original_count	3729
RESULTS_SEARCH_14_PARAMETERS_PEAKLIST_originalfilename	C:\AB SCIEX\ProteinPilot Data\Results\Albert\ZX 20200429 6600\ZX 20200429 6600 C 1A 2.wiff
RESULTS_SEARCH_14_PARAMETERS_PEAKLIST_partnumber	7
RESULTS_SEARCH_14_PARAMETERS_QUANT_TYPE_background_correction	FALSE
RESULTS_SEARCH_14_PARAMETERS_QUANT_TYPE_bias_correction	TRUE
RESULTS_SEARCH_14_PARAMETERS_QUANT_TYPE_keep_extreme_peptides_over_fraction	00:00:00
RESULTS_SEARCH_14_PARAMETERS_QUANT_TYPE_low_confidence_check	TRUE
RESULTS_SEARCH_14_PARAMETERS_QUANT_TYPE_low_intensity_check	TRUE
RESULTS_SEARCH_14_PARAMETERS_QUANT_TYPE_median_statistic	TRUE
RESULTS_SEARCH_14_PARAMETERS_QUANT_TYPE_mod_check	TRUE
RESULTS_SEARCH_14_PARAMETERS_QUANT_TYPE_quant_threshold	-1
RESULTS_SEARCH_14_PARAMETERS_QUANT_TYPE_quant_threshold_sn	9
RESULTS_SEARCH_14_PARAMETERS_QUANT_TYPE_separate_searches	FALSE
RESULTS_SEARCH_14_PARAMETERS_QUANT_TYPE_shared_msms_check	TRUE
RESULTS_SEARCH_14_PARAMETERS_PARAGON_METHOD_SETTINGS_UI_SAMPLE_TYPE	Identification
RESULTS_SEARCH_14_PARAMETERS_PARAGON_METHOD_SETTINGS_UI_CYS_ALKYLATION	Iodoacetamide w other Cys mods possible
RESULTS_SEARCH_14_PARAMETERS_PARAGON_METHOD_SETTINGS_UI_DIGESTION	Trypsin + Lys C
RESULTS_SEARCH_14_PARAMETERS_PARAGON_METHOD_SETTINGS_UI_SPECIAL_FACTOR	Gel-based ID
RESULTS_SEARCH_14_PARAMETERS_PARAGON_METHOD_SETTINGS_UI_INSTRUMENT	TripleTOF 6600
RESULTS_SEARCH_14_PARAMETERS_PARAGON_METHOD_SETTINGS_UI_SEARCH_EFFORT	Thorough
RESULTS_SEARCH_14_PARAMETERS_PARAGON_METHOD_SETTINGS_UI_USER_NAME	IMB-MASS02\massuser
RESULTS_SEARCH_14_PARAMETERS_PARAGON_METHOD_SETTINGS_UI_MACHINE_NAME	IMB-MASS02
RESULTS_SEARCH_14_PARAMETERS_PARAGON_METHOD_SETTINGS_UI_SEARCH_ID	6.37467e+17
RESULTS_SEARCH_14_PARAMETERS_PARAGON_METHOD_SETTINGS_UI_START_TIME	2021-01-19 16:06:38
RESULTS_SEARCH_14_PARAMETERS_PARAGON_METHOD_SETTINGS_UI_MIN_UNUSED_PROTSCORE	0.0458
RESULTS_SEARCH_14_PARAMETERS_PARAGON_METHOD_SETTINGS_UI_PSPEP	TRUE
RESULTS_SEARCH_15_time_cpu	180165
RESULTS_SEARCH_15_time_duration	2530-04-08
RESULTS_SEARCH_15_version	5.0.1.4874
RESULTS_SEARCH_15_xml:id	SEARCH:1:637466691961037774_7
RESULTS_SEARCH_15_PARAMETERS_chemical_data_edited	FALSE
RESULTS_SEARCH_15_PARAMETERS_do_multiprecursor_search	TRUE
RESULTS_SEARCH_15_PARAMETERS_do_reverse_search	TRUE
RESULTS_SEARCH_15_PARAMETERS_max_quant_labels	35
RESULTS_SEARCH_15_PARAMETERS_maxresults	15
RESULTS_SEARCH_15_PARAMETERS_separate_searches	FALSE
RESULTS_SEARCH_15_PARAMETERS_MSTOLERANCE_type	dalton
RESULTS_SEARCH_15_PARAMETERS_MSTOLERANCE_value	0.05
RESULTS_SEARCH_15_PARAMETERS_MSMSTOLERANCE_type	dalton
RESULTS_SEARCH_15_PARAMETERS_MSMSTOLERANCE_value	0.1
RESULTS_SEARCH_15_PARAMETERS_MS_STANDARD_DEVIATION_type	dalton
RESULTS_SEARCH_15_PARAMETERS_MS_STANDARD_DEVIATION_value	0.0011
RESULTS_SEARCH_15_PARAMETERS_MSMS_STANDARD_DEVIATION_type	dalton
RESULTS_SEARCH_15_PARAMETERS_MSMS_STANDARD_DEVIATION_value	0.01
RESULTS_SEARCH_15_PARAMETERS_FASTA_filename	C:\AB SCIEX\ProteinPilot Data\SearchDatabases\uniprot-zebrafish_with_Clover.fasta
RESULTS_SEARCH_15_PARAMETERS_AUTO_CALIBRATION_ms	TRUE
RESULTS_SEARCH_15_PARAMETERS_AUTO_CALIBRATION_msexport	FALSE
RESULTS_SEARCH_15_PARAMETERS_AUTO_CALIBRATION_msms	TRUE
RESULTS_SEARCH_15_PARAMETERS_AUTO_CALIBRATION_msmstolsdratio	2.75
RESULTS_SEARCH_15_PARAMETERS_AUTO_CALIBRATION_mstolsdratio	7
RESULTS_SEARCH_15_PARAMETERS_AUTO_CALIBRATION_squareroot	TRUE
RESULTS_SEARCH_15_PARAMETERS_AUTO_CALIBRATION_type	dalton
RESULTS_SEARCH_15_PARAMETERS_AUTO_CALIBRATION_MCP_d_s_s_f	0.0666667
RESULTS_SEARCH_15_PARAMETERS_AUTO_CALIBRATION_MCP_d_s_w_f	3
RESULTS_SEARCH_15_PARAMETERS_AUTO_CALIBRATION_MCP_m_f_r_mbc	200
RESULTS_SEARCH_15_PARAMETERS_AUTO_CALIBRATION_MCP_m_m_c	10
RESULTS_SEARCH_15_PARAMETERS_AUTO_CALIBRATION_MCP_m_m_f_s	0.25
RESULTS_SEARCH_15_PARAMETERS_AUTO_CALIBRATION_MCP_m_m_p_f	0.33
RESULTS_SEARCH_15_PARAMETERS_AUTO_CALIBRATION_MCP_m_m_p_rms_f	1
RESULTS_SEARCH_15_PARAMETERS_AUTO_CALIBRATION_MCP_m_p_t_f	1
RESULTS_SEARCH_15_PARAMETERS_AUTO_CALIBRATION_MCP_m_r_h_n_b	15
RESULTS_SEARCH_15_PARAMETERS_AUTO_CALIBRATION_MCP_m_z_n_s	99
RESULTS_SEARCH_15_PARAMETERS_AUTO_CALIBRATION_MCP_m_z_s_mn_f_r	0.0666667
RESULTS_SEARCH_15_PARAMETERS_AUTO_CALIBRATION_MCP_m_z_s_mx_f_r	0.1
RESULTS_SEARCH_15_PARAMETERS_MS_AUTO_CALIBRATION_OUT_avres	-2.43527e-10
RESULTS_SEARCH_15_PARAMETERS_MS_AUTO_CALIBRATION_OUT_c0	4.6389e-05
RESULTS_SEARCH_15_PARAMETERS_MS_AUTO_CALIBRATION_OUT_c1minus1	-2.65015e-06
RESULTS_SEARCH_15_PARAMETERS_MS_AUTO_CALIBRATION_OUT_c2	0
RESULTS_SEARCH_15_PARAMETERS_MS_AUTO_CALIBRATION_OUT_file	3
RESULTS_SEARCH_15_PARAMETERS_MS_AUTO_CALIBRATION_OUT_partnumber	8
RESULTS_SEARCH_15_PARAMETERS_MS_AUTO_CALIBRATION_OUT_polyorder	1
RESULTS_SEARCH_15_PARAMETERS_MS_AUTO_CALIBRATION_OUT_sample	1
RESULTS_SEARCH_15_PARAMETERS_MS_AUTO_CALIBRATION_OUT_squareroot	TRUE
RESULTS_SEARCH_15_PARAMETERS_MSMS_AUTO_CALIBRATION_OUT_avres	-4.84233e-08
RESULTS_SEARCH_15_PARAMETERS_MSMS_AUTO_CALIBRATION_OUT_c0	-4.77936e-06
RESULTS_SEARCH_15_PARAMETERS_MSMS_AUTO_CALIBRATION_OUT_c1minus1	-7.24849e-07
RESULTS_SEARCH_15_PARAMETERS_MSMS_AUTO_CALIBRATION_OUT_c2	0
RESULTS_SEARCH_15_PARAMETERS_MSMS_AUTO_CALIBRATION_OUT_file	3
RESULTS_SEARCH_15_PARAMETERS_MSMS_AUTO_CALIBRATION_OUT_partnumber	8
RESULTS_SEARCH_15_PARAMETERS_MSMS_AUTO_CALIBRATION_OUT_polyorder	1
RESULTS_SEARCH_15_PARAMETERS_MSMS_AUTO_CALIBRATION_OUT_sample	1
RESULTS_SEARCH_15_PARAMETERS_MSMS_AUTO_CALIBRATION_OUT_squareroot	TRUE
RESULTS_SEARCH_15_PARAMETERS_MAX_PRECURSORS_FRAGLET	5
RESULTS_SEARCH_15_PARAMETERS_MAX_PRECURSORS_TAGLET	1
RESULTS_SEARCH_15_PARAMETERS_PRECURSORS_DR_FRAGLET	10
RESULTS_SEARCH_15_PARAMETERS_PRECURSORS_DR_TAGLET	3
RESULTS_SEARCH_15_PARAMETERS_DEFAULT_CHARGE_STATE_1_charge	2
RESULTS_SEARCH_15_PARAMETERS_DEFAULT_CHARGE_STATE_1_probability	1
RESULTS_SEARCH_15_PARAMETERS_DEFAULT_CHARGE_STATE_2_charge	3
RESULTS_SEARCH_15_PARAMETERS_DEFAULT_CHARGE_STATE_2_probability	1
RESULTS_SEARCH_15_PARAMETERS_DEFAULT_CHARGE_STATE_3_charge	4
RESULTS_SEARCH_15_PARAMETERS_DEFAULT_CHARGE_STATE_3_probability	1
RESULTS_SEARCH_15_PARAMETERS_VERSION	5.0.1.0, 4895
RESULTS_SEARCH_15_PARAMETERS_PARAGON_VERSION	5.0.1.0, 4874
RESULTS_SEARCH_15_PARAMETERS_APPLICATION	ProteinPilot(tm) Software
RESULTS_SEARCH_15_PARAMETERS_PROGROUP_alternativedispositionmaximumfoldprobabilitydrop	100
RESULTS_SEARCH_15_PARAMETERS_PROGROUP_alternativedispositionmaximumfoldscoredrop	2
RESULTS_SEARCH_15_PARAMETERS_PROGROUP_autodiscordantpeptidethreshold	0.3
RESULTS_SEARCH_15_PARAMETERS_PROGROUP_bayesconfidencecalclulation	TRUE
RESULTS_SEARCH_15_PARAMETERS_PROGROUP_calibrateconfidence	TRUE
RESULTS_SEARCH_15_PARAMETERS_PROGROUP_compresspeptides	FALSE
RESULTS_SEARCH_15_PARAMETERS_PROGROUP_confidencepercentthresholdforexcludingothersfromquant	15
RESULTS_SEARCH_15_PARAMETERS_PROGROUP_confidencepercentthresholdforincludingselfinquant	15
RESULTS_SEARCH_15_PARAMETERS_PROGROUP_donotstoremspeaklists	FALSE
RESULTS_SEARCH_15_PARAMETERS_PROGROUP_fasta	C:\AB SCIEX\ProteinPilot Data\SearchDatabases\uniprot-zebrafish_with_Clover.fasta
RESULTS_SEARCH_15_PARAMETERS_PROGROUP_featuregroupminpepconf	0.66
RESULTS_SEARCH_15_PARAMETERS_PROGROUP_featuregroupminups	0.47
RESULTS_SEARCH_15_PARAMETERS_PROGROUP_focusingintersection	4
RESULTS_SEARCH_15_PARAMETERS_PROGROUP_focusingminimummatchconfidence	0.1
RESULTS_SEARCH_15_PARAMETERS_PROGROUP_focusingminunusedprotscore	0.1
RESULTS_SEARCH_15_PARAMETERS_PROGROUP_focusingsubsetcutoff	6
RESULTS_SEARCH_15_PARAMETERS_PROGROUP_intersection	1.3
RESULTS_SEARCH_15_PARAMETERS_PROGROUP_minimummatchconfidencecutoff	0.001
RESULTS_SEARCH_15_PARAMETERS_PROGROUP_minunusedprotscore	0.0458
RESULTS_SEARCH_15_PARAMETERS_PROGROUP_subsetcutoff	2
RESULTS_SEARCH_15_PARAMETERS_PROGROUP_unusedprotscorethresholdforexcludingothersfromquant	1.3
RESULTS_SEARCH_15_PARAMETERS_PEAKLIST_count	3408
RESULTS_SEARCH_15_PARAMETERS_PEAKLIST_filenumber	3
RESULTS_SEARCH_15_PARAMETERS_PEAKLIST_original_count	3408
RESULTS_SEARCH_15_PARAMETERS_PEAKLIST_originalfilename	C:\AB SCIEX\ProteinPilot Data\Results\Albert\ZX 20200429 6600\ZX 20200429 6600 C 1A 3.wiff
RESULTS_SEARCH_15_PARAMETERS_PEAKLIST_partnumber	8
RESULTS_SEARCH_15_PARAMETERS_QUANT_TYPE_background_correction	FALSE
RESULTS_SEARCH_15_PARAMETERS_QUANT_TYPE_bias_correction	TRUE
RESULTS_SEARCH_15_PARAMETERS_QUANT_TYPE_keep_extreme_peptides_over_fraction	0
RESULTS_SEARCH_15_PARAMETERS_QUANT_TYPE_low_confidence_check	TRUE
RESULTS_SEARCH_15_PARAMETERS_QUANT_TYPE_low_intensity_check	TRUE
RESULTS_SEARCH_15_PARAMETERS_QUANT_TYPE_median_statistic	TRUE
RESULTS_SEARCH_15_PARAMETERS_QUANT_TYPE_mod_check	TRUE
RESULTS_SEARCH_15_PARAMETERS_QUANT_TYPE_quant_threshold	-1
RESULTS_SEARCH_15_PARAMETERS_QUANT_TYPE_quant_threshold_sn	9
RESULTS_SEARCH_15_PARAMETERS_QUANT_TYPE_separate_searches	FALSE
RESULTS_SEARCH_15_PARAMETERS_QUANT_TYPE_shared_msms_check	TRUE
RESULTS_SEARCH_15_PARAMETERS_PARAGON_METHOD_SETTINGS_UI_SAMPLE_TYPE	Identification
RESULTS_SEARCH_15_PARAMETERS_PARAGON_METHOD_SETTINGS_UI_CYS_ALKYLATION	Iodoacetamide w other Cys mods possible
RESULTS_SEARCH_15_PARAMETERS_PARAGON_METHOD_SETTINGS_UI_DIGESTION	Trypsin + Lys C
RESULTS_SEARCH_15_PARAMETERS_PARAGON_METHOD_SETTINGS_UI_SPECIAL_FACTOR	Gel-based ID
RESULTS_SEARCH_15_PARAMETERS_PARAGON_METHOD_SETTINGS_UI_INSTRUMENT	TripleTOF 6600
RESULTS_SEARCH_15_PARAMETERS_PARAGON_METHOD_SETTINGS_UI_SEARCH_EFFORT	Thorough
RESULTS_SEARCH_15_PARAMETERS_PARAGON_METHOD_SETTINGS_UI_USER_NAME	IMB-MASS02\massuser
RESULTS_SEARCH_15_PARAMETERS_PARAGON_METHOD_SETTINGS_UI_MACHINE_NAME	IMB-MASS02
RESULTS_SEARCH_15_PARAMETERS_PARAGON_METHOD_SETTINGS_UI_SEARCH_ID	6.37467e+17
RESULTS_SEARCH_15_PARAMETERS_PARAGON_METHOD_SETTINGS_UI_START_TIME	2021-01-19 16:06:38
RESULTS_SEARCH_15_PARAMETERS_PARAGON_METHOD_SETTINGS_UI_MIN_UNUSED_PROTSCORE	0.0458
RESULTS_SEARCH_15_PARAMETERS_PARAGON_METHOD_SETTINGS_UI_PSPEP	TRUE
RESULTS_SEARCH_16_time_cpu	228291
RESULTS_SEARCH_16_time_duration	293416
RESULTS_SEARCH_16_version	5.0.1.4874
RESULTS_SEARCH_16_xml:id	SEARCH:2:637466691961037774_7
RESULTS_SEARCH_16_PARAMETERS_chemical_data_edited	FALSE
RESULTS_SEARCH_16_PARAMETERS_do_multiprecursor_search	TRUE
RESULTS_SEARCH_16_PARAMETERS_do_reverse_search	TRUE
RESULTS_SEARCH_16_PARAMETERS_max_quant_labels	35
RESULTS_SEARCH_16_PARAMETERS_maxresults	15
RESULTS_SEARCH_16_PARAMETERS_separate_searches	FALSE
RESULTS_SEARCH_16_PARAMETERS_MSTOLERANCE_type	dalton
RESULTS_SEARCH_16_PARAMETERS_MSTOLERANCE_value	0.05
RESULTS_SEARCH_16_PARAMETERS_MSMSTOLERANCE_type	dalton
RESULTS_SEARCH_16_PARAMETERS_MSMSTOLERANCE_value	0.1
RESULTS_SEARCH_16_PARAMETERS_MS_STANDARD_DEVIATION_type	dalton
RESULTS_SEARCH_16_PARAMETERS_MS_STANDARD_DEVIATION_value	0.0011
RESULTS_SEARCH_16_PARAMETERS_MSMS_STANDARD_DEVIATION_type	dalton
RESULTS_SEARCH_16_PARAMETERS_MSMS_STANDARD_DEVIATION_value	0.01
RESULTS_SEARCH_16_PARAMETERS_FASTA_filename	C:\AB SCIEX\ProteinPilot Data\SearchDatabases\uniprot-zebrafish_with_Clover.fasta
RESULTS_SEARCH_16_PARAMETERS_AUTO_CALIBRATION_ms	TRUE
RESULTS_SEARCH_16_PARAMETERS_AUTO_CALIBRATION_msexport	FALSE
RESULTS_SEARCH_16_PARAMETERS_AUTO_CALIBRATION_msms	TRUE
RESULTS_SEARCH_16_PARAMETERS_AUTO_CALIBRATION_msmstolsdratio	2.75
RESULTS_SEARCH_16_PARAMETERS_AUTO_CALIBRATION_mstolsdratio	7
RESULTS_SEARCH_16_PARAMETERS_AUTO_CALIBRATION_squareroot	TRUE
RESULTS_SEARCH_16_PARAMETERS_AUTO_CALIBRATION_type	dalton
RESULTS_SEARCH_16_PARAMETERS_AUTO_CALIBRATION_MCP_d_s_s_f	0.0666667
RESULTS_SEARCH_16_PARAMETERS_AUTO_CALIBRATION_MCP_d_s_w_f	3
RESULTS_SEARCH_16_PARAMETERS_AUTO_CALIBRATION_MCP_m_f_r_mbc	200
RESULTS_SEARCH_16_PARAMETERS_AUTO_CALIBRATION_MCP_m_m_c	10
RESULTS_SEARCH_16_PARAMETERS_AUTO_CALIBRATION_MCP_m_m_f_s	0.25
RESULTS_SEARCH_16_PARAMETERS_AUTO_CALIBRATION_MCP_m_m_p_f	0.33
RESULTS_SEARCH_16_PARAMETERS_AUTO_CALIBRATION_MCP_m_m_p_rms_f	1
RESULTS_SEARCH_16_PARAMETERS_AUTO_CALIBRATION_MCP_m_p_t_f	1
RESULTS_SEARCH_16_PARAMETERS_AUTO_CALIBRATION_MCP_m_r_h_n_b	15
RESULTS_SEARCH_16_PARAMETERS_AUTO_CALIBRATION_MCP_m_z_n_s	99
RESULTS_SEARCH_16_PARAMETERS_AUTO_CALIBRATION_MCP_m_z_s_mn_f_r	0.0666667
RESULTS_SEARCH_16_PARAMETERS_AUTO_CALIBRATION_MCP_m_z_s_mx_f_r	0.1
RESULTS_SEARCH_16_PARAMETERS_MS_AUTO_CALIBRATION_OUT_avres	-2.43527e-10
RESULTS_SEARCH_16_PARAMETERS_MS_AUTO_CALIBRATION_OUT_c0	4.6389e-05
RESULTS_SEARCH_16_PARAMETERS_MS_AUTO_CALIBRATION_OUT_c1minus1	-2.65015e-06
RESULTS_SEARCH_16_PARAMETERS_MS_AUTO_CALIBRATION_OUT_c2	0
RESULTS_SEARCH_16_PARAMETERS_MS_AUTO_CALIBRATION_OUT_file	3
RESULTS_SEARCH_16_PARAMETERS_MS_AUTO_CALIBRATION_OUT_partnumber	8
RESULTS_SEARCH_16_PARAMETERS_MS_AUTO_CALIBRATION_OUT_polyorder	1
RESULTS_SEARCH_16_PARAMETERS_MS_AUTO_CALIBRATION_OUT_sample	1
RESULTS_SEARCH_16_PARAMETERS_MS_AUTO_CALIBRATION_OUT_squareroot	TRUE
RESULTS_SEARCH_16_PARAMETERS_MSMS_AUTO_CALIBRATION_OUT_avres	-4.84233e-08
RESULTS_SEARCH_16_PARAMETERS_MSMS_AUTO_CALIBRATION_OUT_c0	-4.77936e-06
RESULTS_SEARCH_16_PARAMETERS_MSMS_AUTO_CALIBRATION_OUT_c1minus1	-7.24849e-07
RESULTS_SEARCH_16_PARAMETERS_MSMS_AUTO_CALIBRATION_OUT_c2	0
RESULTS_SEARCH_16_PARAMETERS_MSMS_AUTO_CALIBRATION_OUT_file	3
RESULTS_SEARCH_16_PARAMETERS_MSMS_AUTO_CALIBRATION_OUT_partnumber	8
RESULTS_SEARCH_16_PARAMETERS_MSMS_AUTO_CALIBRATION_OUT_polyorder	1
RESULTS_SEARCH_16_PARAMETERS_MSMS_AUTO_CALIBRATION_OUT_sample	1
RESULTS_SEARCH_16_PARAMETERS_MSMS_AUTO_CALIBRATION_OUT_squareroot	TRUE
RESULTS_SEARCH_16_PARAMETERS_MAX_PRECURSORS_FRAGLET	5
RESULTS_SEARCH_16_PARAMETERS_MAX_PRECURSORS_TAGLET	1
RESULTS_SEARCH_16_PARAMETERS_PRECURSORS_DR_FRAGLET	1900-01-10
RESULTS_SEARCH_16_PARAMETERS_PRECURSORS_DR_TAGLET	1900-01-03
RESULTS_SEARCH_16_PARAMETERS_DEFAULT_CHARGE_STATE_1_charge	2
RESULTS_SEARCH_16_PARAMETERS_DEFAULT_CHARGE_STATE_1_probability	1
RESULTS_SEARCH_16_PARAMETERS_DEFAULT_CHARGE_STATE_2_charge	3
RESULTS_SEARCH_16_PARAMETERS_DEFAULT_CHARGE_STATE_2_probability	1
RESULTS_SEARCH_16_PARAMETERS_DEFAULT_CHARGE_STATE_3_charge	4
RESULTS_SEARCH_16_PARAMETERS_DEFAULT_CHARGE_STATE_3_probability	1
RESULTS_SEARCH_16_PARAMETERS_VERSION	5.0.1.0, 4895
RESULTS_SEARCH_16_PARAMETERS_PARAGON_VERSION	5.0.1.0, 4874
RESULTS_SEARCH_16_PARAMETERS_APPLICATION	ProteinPilot(tm) Software
RESULTS_SEARCH_16_PARAMETERS_PROGROUP_alternativedispositionmaximumfoldprobabilitydrop	100
RESULTS_SEARCH_16_PARAMETERS_PROGROUP_alternativedispositionmaximumfoldscoredrop	2
RESULTS_SEARCH_16_PARAMETERS_PROGROUP_autodiscordantpeptidethreshold	0.3
RESULTS_SEARCH_16_PARAMETERS_PROGROUP_bayesconfidencecalclulation	TRUE
RESULTS_SEARCH_16_PARAMETERS_PROGROUP_calibrateconfidence	TRUE
RESULTS_SEARCH_16_PARAMETERS_PROGROUP_compresspeptides	FALSE
RESULTS_SEARCH_16_PARAMETERS_PROGROUP_confidencepercentthresholdforexcludingothersfromquant	15
RESULTS_SEARCH_16_PARAMETERS_PROGROUP_confidencepercentthresholdforincludingselfinquant	15
RESULTS_SEARCH_16_PARAMETERS_PROGROUP_donotstoremspeaklists	FALSE
RESULTS_SEARCH_16_PARAMETERS_PROGROUP_fasta	C:\AB SCIEX\ProteinPilot Data\SearchDatabases\uniprot-zebrafish_with_Clover.fasta
RESULTS_SEARCH_16_PARAMETERS_PROGROUP_featuregroupminpepconf	0.66
RESULTS_SEARCH_16_PARAMETERS_PROGROUP_featuregroupminups	0.47
RESULTS_SEARCH_16_PARAMETERS_PROGROUP_focusingintersection	4
RESULTS_SEARCH_16_PARAMETERS_PROGROUP_focusingminimummatchconfidence	0.1
RESULTS_SEARCH_16_PARAMETERS_PROGROUP_focusingminunusedprotscore	0.1
RESULTS_SEARCH_16_PARAMETERS_PROGROUP_focusingsubsetcutoff	6
RESULTS_SEARCH_16_PARAMETERS_PROGROUP_intersection	1.3
RESULTS_SEARCH_16_PARAMETERS_PROGROUP_minimummatchconfidencecutoff	0.001
RESULTS_SEARCH_16_PARAMETERS_PROGROUP_minunusedprotscore	0.0458
RESULTS_SEARCH_16_PARAMETERS_PROGROUP_subsetcutoff	2
RESULTS_SEARCH_16_PARAMETERS_PROGROUP_unusedprotscorethresholdforexcludingothersfromquant	1.3
RESULTS_SEARCH_16_PARAMETERS_PEAKLIST_count	3408
RESULTS_SEARCH_16_PARAMETERS_PEAKLIST_filenumber	3
RESULTS_SEARCH_16_PARAMETERS_PEAKLIST_original_count	3408
RESULTS_SEARCH_16_PARAMETERS_PEAKLIST_originalfilename	C:\AB SCIEX\ProteinPilot Data\Results\Albert\ZX 20200429 6600\ZX 20200429 6600 C 1A 3.wiff
RESULTS_SEARCH_16_PARAMETERS_PEAKLIST_partnumber	8
RESULTS_SEARCH_16_PARAMETERS_QUANT_TYPE_background_correction	FALSE
RESULTS_SEARCH_16_PARAMETERS_QUANT_TYPE_bias_correction	TRUE
RESULTS_SEARCH_16_PARAMETERS_QUANT_TYPE_keep_extreme_peptides_over_fraction	0
RESULTS_SEARCH_16_PARAMETERS_QUANT_TYPE_low_confidence_check	TRUE
RESULTS_SEARCH_16_PARAMETERS_QUANT_TYPE_low_intensity_check	TRUE
RESULTS_SEARCH_16_PARAMETERS_QUANT_TYPE_median_statistic	TRUE
RESULTS_SEARCH_16_PARAMETERS_QUANT_TYPE_mod_check	TRUE
RESULTS_SEARCH_16_PARAMETERS_QUANT_TYPE_quant_threshold	-1
RESULTS_SEARCH_16_PARAMETERS_QUANT_TYPE_quant_threshold_sn	9
RESULTS_SEARCH_16_PARAMETERS_QUANT_TYPE_separate_searches	FALSE
RESULTS_SEARCH_16_PARAMETERS_QUANT_TYPE_shared_msms_check	TRUE
RESULTS_SEARCH_16_PARAMETERS_PARAGON_METHOD_SETTINGS_UI_SAMPLE_TYPE	Identification
RESULTS_SEARCH_16_PARAMETERS_PARAGON_METHOD_SETTINGS_UI_CYS_ALKYLATION	Iodoacetamide w other Cys mods possible
RESULTS_SEARCH_16_PARAMETERS_PARAGON_METHOD_SETTINGS_UI_DIGESTION	Trypsin + Lys C
RESULTS_SEARCH_16_PARAMETERS_PARAGON_METHOD_SETTINGS_UI_SPECIAL_FACTOR	Gel-based ID
RESULTS_SEARCH_16_PARAMETERS_PARAGON_METHOD_SETTINGS_UI_INSTRUMENT	TripleTOF 6600
RESULTS_SEARCH_16_PARAMETERS_PARAGON_METHOD_SETTINGS_UI_SEARCH_EFFORT	Thorough
RESULTS_SEARCH_16_PARAMETERS_PARAGON_METHOD_SETTINGS_UI_USER_NAME	IMB-MASS02\massuser
RESULTS_SEARCH_16_PARAMETERS_PARAGON_METHOD_SETTINGS_UI_MACHINE_NAME	IMB-MASS02
RESULTS_SEARCH_16_PARAMETERS_PARAGON_METHOD_SETTINGS_UI_SEARCH_ID	6.37467e+17
RESULTS_SEARCH_16_PARAMETERS_PARAGON_METHOD_SETTINGS_UI_START_TIME	2021-01-19 16:06:38
RESULTS_SEARCH_16_PARAMETERS_PARAGON_METHOD_SETTINGS_UI_MIN_UNUSED_PROTSCORE	0.0458
RESULTS_SEARCH_16_PARAMETERS_PARAGON_METHOD_SETTINGS_UI_PSPEP	TRUE
RESULTS_SEARCH_17_time_cpu	205687
RESULTS_SEARCH_17_time_duration	263306
RESULTS_SEARCH_17_version	5.0.1.4874
RESULTS_SEARCH_17_xml:id	SEARCH:1:637466691961037774_8
RESULTS_SEARCH_17_PARAMETERS_chemical_data_edited	FALSE
RESULTS_SEARCH_17_PARAMETERS_do_multiprecursor_search	TRUE
RESULTS_SEARCH_17_PARAMETERS_do_reverse_search	TRUE
RESULTS_SEARCH_17_PARAMETERS_max_quant_labels	35
RESULTS_SEARCH_17_PARAMETERS_maxresults	15
RESULTS_SEARCH_17_PARAMETERS_separate_searches	FALSE
RESULTS_SEARCH_17_PARAMETERS_MSTOLERANCE_type	dalton
RESULTS_SEARCH_17_PARAMETERS_MSTOLERANCE_value	0.05
RESULTS_SEARCH_17_PARAMETERS_MSMSTOLERANCE_type	dalton
RESULTS_SEARCH_17_PARAMETERS_MSMSTOLERANCE_value	0.1
RESULTS_SEARCH_17_PARAMETERS_MS_STANDARD_DEVIATION_type	dalton
RESULTS_SEARCH_17_PARAMETERS_MS_STANDARD_DEVIATION_value	0.0011
RESULTS_SEARCH_17_PARAMETERS_MSMS_STANDARD_DEVIATION_type	dalton
RESULTS_SEARCH_17_PARAMETERS_MSMS_STANDARD_DEVIATION_value	0.01
RESULTS_SEARCH_17_PARAMETERS_FASTA_filename	C:\AB SCIEX\ProteinPilot Data\SearchDatabases\uniprot-zebrafish_with_Clover.fasta
RESULTS_SEARCH_17_PARAMETERS_AUTO_CALIBRATION_ms	TRUE
RESULTS_SEARCH_17_PARAMETERS_AUTO_CALIBRATION_msexport	FALSE
RESULTS_SEARCH_17_PARAMETERS_AUTO_CALIBRATION_msms	TRUE
RESULTS_SEARCH_17_PARAMETERS_AUTO_CALIBRATION_msmstolsdratio	2.75
RESULTS_SEARCH_17_PARAMETERS_AUTO_CALIBRATION_mstolsdratio	7
RESULTS_SEARCH_17_PARAMETERS_AUTO_CALIBRATION_squareroot	TRUE
RESULTS_SEARCH_17_PARAMETERS_AUTO_CALIBRATION_type	dalton
RESULTS_SEARCH_17_PARAMETERS_AUTO_CALIBRATION_MCP_d_s_s_f	0.0666667
RESULTS_SEARCH_17_PARAMETERS_AUTO_CALIBRATION_MCP_d_s_w_f	3
RESULTS_SEARCH_17_PARAMETERS_AUTO_CALIBRATION_MCP_m_f_r_mbc	200
RESULTS_SEARCH_17_PARAMETERS_AUTO_CALIBRATION_MCP_m_m_c	10
RESULTS_SEARCH_17_PARAMETERS_AUTO_CALIBRATION_MCP_m_m_f_s	0.25
RESULTS_SEARCH_17_PARAMETERS_AUTO_CALIBRATION_MCP_m_m_p_f	0.33
RESULTS_SEARCH_17_PARAMETERS_AUTO_CALIBRATION_MCP_m_m_p_rms_f	1
RESULTS_SEARCH_17_PARAMETERS_AUTO_CALIBRATION_MCP_m_p_t_f	1
RESULTS_SEARCH_17_PARAMETERS_AUTO_CALIBRATION_MCP_m_r_h_n_b	15
RESULTS_SEARCH_17_PARAMETERS_AUTO_CALIBRATION_MCP_m_z_n_s	99
RESULTS_SEARCH_17_PARAMETERS_AUTO_CALIBRATION_MCP_m_z_s_mn_f_r	0.0666667
RESULTS_SEARCH_17_PARAMETERS_AUTO_CALIBRATION_MCP_m_z_s_mx_f_r	0.1
RESULTS_SEARCH_17_PARAMETERS_MS_AUTO_CALIBRATION_OUT_avres	-2.53666e-10
RESULTS_SEARCH_17_PARAMETERS_MS_AUTO_CALIBRATION_OUT_c0	-6.53612e-06
RESULTS_SEARCH_17_PARAMETERS_MS_AUTO_CALIBRATION_OUT_c1minus1	-8.87e-07
RESULTS_SEARCH_17_PARAMETERS_MS_AUTO_CALIBRATION_OUT_c2	0
RESULTS_SEARCH_17_PARAMETERS_MS_AUTO_CALIBRATION_OUT_file	3
RESULTS_SEARCH_17_PARAMETERS_MS_AUTO_CALIBRATION_OUT_partnumber	9
RESULTS_SEARCH_17_PARAMETERS_MS_AUTO_CALIBRATION_OUT_polyorder	1
RESULTS_SEARCH_17_PARAMETERS_MS_AUTO_CALIBRATION_OUT_sample	1900-01-01
RESULTS_SEARCH_17_PARAMETERS_MS_AUTO_CALIBRATION_OUT_squareroot	TRUE
RESULTS_SEARCH_17_PARAMETERS_MSMS_AUTO_CALIBRATION_OUT_avres	-5.27795e-08
RESULTS_SEARCH_17_PARAMETERS_MSMS_AUTO_CALIBRATION_OUT_c0	4.18554e-06
RESULTS_SEARCH_17_PARAMETERS_MSMS_AUTO_CALIBRATION_OUT_c1minus1	-1.40799e-06
RESULTS_SEARCH_17_PARAMETERS_MSMS_AUTO_CALIBRATION_OUT_c2	0
RESULTS_SEARCH_17_PARAMETERS_MSMS_AUTO_CALIBRATION_OUT_file	3
RESULTS_SEARCH_17_PARAMETERS_MSMS_AUTO_CALIBRATION_OUT_partnumber	9
RESULTS_SEARCH_17_PARAMETERS_MSMS_AUTO_CALIBRATION_OUT_polyorder	1
RESULTS_SEARCH_17_PARAMETERS_MSMS_AUTO_CALIBRATION_OUT_sample	1
RESULTS_SEARCH_17_PARAMETERS_MSMS_AUTO_CALIBRATION_OUT_squareroot	TRUE
RESULTS_SEARCH_17_PARAMETERS_MAX_PRECURSORS_FRAGLET	5
RESULTS_SEARCH_17_PARAMETERS_MAX_PRECURSORS_TAGLET	1
RESULTS_SEARCH_17_PARAMETERS_PRECURSORS_DR_FRAGLET	10
RESULTS_SEARCH_17_PARAMETERS_PRECURSORS_DR_TAGLET	3
RESULTS_SEARCH_17_PARAMETERS_DEFAULT_CHARGE_STATE_1_charge	2
RESULTS_SEARCH_17_PARAMETERS_DEFAULT_CHARGE_STATE_1_probability	1
RESULTS_SEARCH_17_PARAMETERS_DEFAULT_CHARGE_STATE_2_charge	3
RESULTS_SEARCH_17_PARAMETERS_DEFAULT_CHARGE_STATE_2_probability	1
RESULTS_SEARCH_17_PARAMETERS_DEFAULT_CHARGE_STATE_3_charge	4
RESULTS_SEARCH_17_PARAMETERS_DEFAULT_CHARGE_STATE_3_probability	1
RESULTS_SEARCH_17_PARAMETERS_VERSION	5.0.1.0, 4895
RESULTS_SEARCH_17_PARAMETERS_PARAGON_VERSION	5.0.1.0, 4874
RESULTS_SEARCH_17_PARAMETERS_APPLICATION	ProteinPilot(tm) Software
RESULTS_SEARCH_17_PARAMETERS_PROGROUP_alternativedispositionmaximumfoldprobabilitydrop	100
RESULTS_SEARCH_17_PARAMETERS_PROGROUP_alternativedispositionmaximumfoldscoredrop	2
RESULTS_SEARCH_17_PARAMETERS_PROGROUP_autodiscordantpeptidethreshold	0.3
[truncated: 7,500 more rows]

## Sheet: Metadata Calculations
	Subsearch	Search string	present		File index down	Part number	Spectra - 'original'	Spectra 'count' - non-empty?	max original Spectra for part	Max non-empty spectra for part	File Index for first only
	1	RESULTS_SEARCH_1_PARAMETERS_PEAKLIST_rawdatafilename		C:\AB SCIEX\ProteinPilot Data\Results\Albert\ZX 20200429 6600\ZX 20200429 6600 C 1A 1.wiff	1	1	3091	3091	3091	3091	1
	2	RESULTS_SEARCH_2_PARAMETERS_PEAKLIST_rawdatafilename		C:\AB SCIEX\ProteinPilot Data\Results\Albert\ZX 20200429 6600\ZX 20200429 6600 C 1A 1.wiff	1	1	3091	3091
	3	RESULTS_SEARCH_3_PARAMETERS_PEAKLIST_rawdatafilename		C:\AB SCIEX\ProteinPilot Data\Results\Albert\ZX 20200429 6600\ZX 20200429 6600 C 1A 1.wiff	1	2	3102	3102	3102	3102
1 if Rapid, 2 if Thor	4	RESULTS_SEARCH_4_PARAMETERS_PEAKLIST_rawdatafilename		C:\AB SCIEX\ProteinPilot Data\Results\Albert\ZX 20200429 6600\ZX 20200429 6600 C 1A 1.wiff	1	2	3102	3102
2	5	RESULTS_SEARCH_5_PARAMETERS_PEAKLIST_rawdatafilename		C:\AB SCIEX\ProteinPilot Data\Results\Albert\ZX 20200429 6600\ZX 20200429 6600 C 1A 1.wiff	1	3	3088	3088	3088	3088
	6	RESULTS_SEARCH_6_PARAMETERS_PEAKLIST_rawdatafilename		C:\AB SCIEX\ProteinPilot Data\Results\Albert\ZX 20200429 6600\ZX 20200429 6600 C 1A 1.wiff	1	3	3088	3088
# Segments	7	RESULTS_SEARCH_7_PARAMETERS_PEAKLIST_rawdatafilename		C:\AB SCIEX\ProteinPilot Data\Results\Albert\ZX 20200429 6600\ZX 20200429 6600 C 1A 1.wiff	1	4	3082	3082	3082	3082
80	8	RESULTS_SEARCH_8_PARAMETERS_PEAKLIST_rawdatafilename		C:\AB SCIEX\ProteinPilot Data\Results\Albert\ZX 20200429 6600\ZX 20200429 6600 C 1A 1.wiff	1	4	3082	3082
(max is 1000 segments)	9	RESULTS_SEARCH_9_PARAMETERS_PEAKLIST_rawdatafilename		C:\AB SCIEX\ProteinPilot Data\Results\Albert\ZX 20200429 6600\ZX 20200429 6600 C 1A 2.wiff	2	5	3749	3749	3749	3749	2
	10	RESULTS_SEARCH_10_PARAMETERS_PEAKLIST_rawdatafilename		C:\AB SCIEX\ProteinPilot Data\Results\Albert\ZX 20200429 6600\ZX 20200429 6600 C 1A 2.wiff	2	5	3749	3749
	11	RESULTS_SEARCH_11_PARAMETERS_PEAKLIST_rawdatafilename		C:\AB SCIEX\ProteinPilot Data\Results\Albert\ZX 20200429 6600\ZX 20200429 6600 C 1A 2.wiff	2	6	3735	3735	3735	3735
	12	RESULTS_SEARCH_12_PARAMETERS_PEAKLIST_rawdatafilename		C:\AB SCIEX\ProteinPilot Data\Results\Albert\ZX 20200429 6600\ZX 20200429 6600 C 1A 2.wiff	2	6	3735	3735
	13	RESULTS_SEARCH_13_PARAMETERS_PEAKLIST_rawdatafilename		C:\AB SCIEX\ProteinPilot Data\Results\Albert\ZX 20200429 6600\ZX 20200429 6600 C 1A 2.wiff	2	7	3729	3729	3729	3729
	14	RESULTS_SEARCH_14_PARAMETERS_PEAKLIST_rawdatafilename		C:\AB SCIEX\ProteinPilot Data\Results\Albert\ZX 20200429 6600\ZX 20200429 6600 C 1A 2.wiff	2	7	3729	3729
	15	RESULTS_SEARCH_15_PARAMETERS_PEAKLIST_rawdatafilename		C:\AB SCIEX\ProteinPilot Data\Results\Albert\ZX 20200429 6600\ZX 20200429 6600 C 1A 3.wiff	3	8	3408	3408	3408	3408	3
	16	RESULTS_SEARCH_16_PARAMETERS_PEAKLIST_rawdatafilename		C:\AB SCIEX\ProteinPilot Data\Results\Albert\ZX 20200429 6600\ZX 20200429 6600 C 1A 3.wiff	3	8	3408	3408
	17	RESULTS_SEARCH_17_PARAMETERS_PEAKLIST_rawdatafilename		C:\AB SCIEX\ProteinPilot Data\Results\Albert\ZX 20200429 6600\ZX 20200429 6600 C 1A 3.wiff	3	9	3360	3360	3360	3360
	18	RESULTS_SEARCH_18_PARAMETERS_PEAKLIST_rawdatafilename		C:\AB SCIEX\ProteinPilot Data\Results\Albert\ZX 20200429 6600\ZX 20200429 6600 C 1A 3.wiff	3	9	3360	3360
	19	RESULTS_SEARCH_19_PARAMETERS_PEAKLIST_rawdatafilename		C:\AB SCIEX\ProteinPilot Data\Results\Albert\ZX 20200429 6600\ZX 20200429 6600 C 1A 3.wiff	3	10	3382	3382	3382	3382
	20	RESULTS_SEARCH_20_PARAMETERS_PEAKLIST_rawdatafilename		C:\AB SCIEX\ProteinPilot Data\Results\Albert\ZX 20200429 6600\ZX 20200429 6600 C 1A 3.wiff	3	10	3382	3382
	21	RESULTS_SEARCH_21_PARAMETERS_PEAKLIST_rawdatafilename		C:\AB SCIEX\ProteinPilot Data\Results\Albert\ZX 20200429 6600\ZX 20200429 6600 C 1A 3.wiff	3	11	3371	3371	3371	3371
	22	RESULTS_SEARCH_22_PARAMETERS_PEAKLIST_rawdatafilename		C:\AB SCIEX\ProteinPilot Data\Results\Albert\ZX 20200429 6600\ZX 20200429 6600 C 1A 3.wiff	3	11	3371	3371
	23	RESULTS_SEARCH_23_PARAMETERS_PEAKLIST_rawdatafilename		C:\AB SCIEX\ProteinPilot Data\Results\Albert\ZX 20200429 6600\ZX 20200429 6600 C 1A 4.wiff	4	12	3549	3549	3549	3549	4
	24	RESULTS_SEARCH_24_PARAMETERS_PEAKLIST_rawdatafilename		C:\AB SCIEX\ProteinPilot Data\Results\Albert\ZX 20200429 6600\ZX 20200429 6600 C 1A 4.wiff	4	12	3549	3549
	25	RESULTS_SEARCH_25_PARAMETERS_PEAKLIST_rawdatafilename		C:\AB SCIEX\ProteinPilot Data\Results\Albert\ZX 20200429 6600\ZX 20200429 6600 C 1A 4.wiff	4	13	3524	3524	3524	3524
	26	RESULTS_SEARCH_26_PARAMETERS_PEAKLIST_rawdatafilename		C:\AB SCIEX\ProteinPilot Data\Results\Albert\ZX 20200429 6600\ZX 20200429 6600 C 1A 4.wiff	4	13	3524	3524
	27	RESULTS_SEARCH_27_PARAMETERS_PEAKLIST_rawdatafilename		C:\AB SCIEX\ProteinPilot Data\Results\Albert\ZX 20200429 6600\ZX 20200429 6600 C 1A 4.wiff	4	14	3508	3508	3508	3508
	28	RESULTS_SEARCH_28_PARAMETERS_PEAKLIST_rawdatafilename		C:\AB SCIEX\ProteinPilot Data\Results\Albert\ZX 20200429 6600\ZX 20200429 6600 C 1A 4.wiff	4	14	3508	3508
	29	RESULTS_SEARCH_29_PARAMETERS_PEAKLIST_rawdatafilename		C:\AB SCIEX\ProteinPilot Data\Results\Albert\ZX 20200429 6600\ZX 20200429 6600 C 1A 4.wiff	4	15	3516	3516	3516	3516
	30	RESULTS_SEARCH_30_PARAMETERS_PEAKLIST_rawdatafilename		C:\AB SCIEX\ProteinPilot Data\Results\Albert\ZX 20200429 6600\ZX 20200429 6600 C 1A 4.wiff	4	15	3516	3516
	31	RESULTS_SEARCH_31_PARAMETERS_PEAKLIST_rawdatafilename		C:\AB SCIEX\ProteinPilot Data\Results\Albert\ZX 20200429 6600\ZX 20200429 6600 C 1A 5.wiff	5	16	3031	3031	3031	3031	5
	32	RESULTS_SEARCH_32_PARAMETERS_PEAKLIST_rawdatafilename		C:\AB SCIEX\ProteinPilot Data\Results\Albert\ZX 20200429 6600\ZX 20200429 6600 C 1A 5.wiff	5	16	3031	3031
	33	RESULTS_SEARCH_33_PARAMETERS_PEAKLIST_rawdatafilename		C:\AB SCIEX\ProteinPilot Data\Results\Albert\ZX 20200429 6600\ZX 20200429 6600 C 1A 5.wiff	5	17	2992	2992	2992	2992
	34	RESULTS_SEARCH_34_PARAMETERS_PEAKLIST_rawdatafilename		C:\AB SCIEX\ProteinPilot Data\Results\Albert\ZX 20200429 6600\ZX 20200429 6600 C 1A 5.wiff	5	17	2992	2992
	35	RESULTS_SEARCH_35_PARAMETERS_PEAKLIST_rawdatafilename		C:\AB SCIEX\ProteinPilot Data\Results\Albert\ZX 20200429 6600\ZX 20200429 6600 C 1A 5.wiff	5	18	3005	3005	3005	3005
	36	RESULTS_SEARCH_36_PARAMETERS_PEAKLIST_rawdatafilename		C:\AB SCIEX\ProteinPilot Data\Results\Albert\ZX 20200429 6600\ZX 20200429 6600 C 1A 5.wiff	5	18	3005	3005
	37	RESULTS_SEARCH_37_PARAMETERS_PEAKLIST_rawdatafilename		C:\AB SCIEX\ProteinPilot Data\Results\Albert\ZX 20200429 6600\ZX 20200429 6600 C 1A 5.wiff	5	19	3003	3003	3003	3003
	38	RESULTS_SEARCH_38_PARAMETERS_PEAKLIST_rawdatafilename		C:\AB SCIEX\ProteinPilot Data\Results\Albert\ZX 20200429 6600\ZX 20200429 6600 C 1A 5.wiff	5	19	3003	3003
	39	RESULTS_SEARCH_39_PARAMETERS_PEAKLIST_rawdatafilename		C:\AB SCIEX\ProteinPilot Data\Results\Albert\ZX 20200429 6600\ZX 20200429 6600 C 1A 6.wiff	6	20	3806	3806	3806	3806	6
	40	RESULTS_SEARCH_40_PARAMETERS_PEAKLIST_rawdatafilename		C:\AB SCIEX\ProteinPilot Data\Results\Albert\ZX 20200429 6600\ZX 20200429 6600 C 1A 6.wiff	6	20	3806	3806
	41	RESULTS_SEARCH_41_PARAMETERS_PEAKLIST_rawdatafilename		C:\AB SCIEX\ProteinPilot Data\Results\Albert\ZX 20200429 6600\ZX 20200429 6600 C 1A 6.wiff	6	21	3812	3812	3812	3812
	42	RESULTS_SEARCH_42_PARAMETERS_PEAKLIST_rawdatafilename		C:\AB SCIEX\ProteinPilot Data\Results\Albert\ZX 20200429 6600\ZX 20200429 6600 C 1A 6.wiff	6	21	3812	3812
	43	RESULTS_SEARCH_43_PARAMETERS_PEAKLIST_rawdatafilename		C:\AB SCIEX\ProteinPilot Data\Results\Albert\ZX 20200429 6600\ZX 20200429 6600 C 1A 6.wiff	6	22	3778	3778	3778	3778
	44	RESULTS_SEARCH_44_PARAMETERS_PEAKLIST_rawdatafilename		C:\AB SCIEX\ProteinPilot Data\Results\Albert\ZX 20200429 6600\ZX 20200429 6600 C 1A 6.wiff	6	22	3778	3778
	45	RESULTS_SEARCH_45_PARAMETERS_PEAKLIST_rawdatafilename		C:\AB SCIEX\ProteinPilot Data\Results\Albert\ZX 20200429 6600\ZX 20200429 6600 C 1A 7.wiff	7	23	3683	3683	3683	3683	7
	46	RESULTS_SEARCH_46_PARAMETERS_PEAKLIST_rawdatafilename		C:\AB SCIEX\ProteinPilot Data\Results\Albert\ZX 20200429 6600\ZX 20200429 6600 C 1A 7.wiff	7	23	3683	3683
	47	RESULTS_SEARCH_47_PARAMETERS_PEAKLIST_rawdatafilename		C:\AB SCIEX\ProteinPilot Data\Results\Albert\ZX 20200429 6600\ZX 20200429 6600 C 1A 7.wiff	7	24	3673	3673	3673	3673
	48	RESULTS_SEARCH_48_PARAMETERS_PEAKLIST_rawdatafilename		C:\AB SCIEX\ProteinPilot Data\Results\Albert\ZX 20200429 6600\ZX 20200429 6600 C 1A 7.wiff	7	24	3673	3673
	49	RESULTS_SEARCH_49_PARAMETERS_PEAKLIST_rawdatafilename		C:\AB SCIEX\ProteinPilot Data\Results\Albert\ZX 20200429 6600\ZX 20200429 6600 C 1A 8.wiff	8	25	3151	3151	3151	3151	8
	50	RESULTS_SEARCH_50_PARAMETERS_PEAKLIST_rawdatafilename		C:\AB SCIEX\ProteinPilot Data\Results\Albert\ZX 20200429 6600\ZX 20200429 6600 C 1A 8.wiff	8	25	3151	3151
	51	RESULTS_SEARCH_51_PARAMETERS_PEAKLIST_rawdatafilename		C:\AB SCIEX\ProteinPilot Data\Results\Albert\ZX 20200429 6600\ZX 20200429 6600 C 1A 8.wiff	8	26	3126	3126	3126	3126
	52	RESULTS_SEARCH_52_PARAMETERS_PEAKLIST_rawdatafilename		C:\AB SCIEX\ProteinPilot Data\Results\Albert\ZX 20200429 6600\ZX 20200429 6600 C 1A 8.wiff	8	26	3126	3126
	53	RESULTS_SEARCH_53_PARAMETERS_PEAKLIST_rawdatafilename		C:\AB SCIEX\ProteinPilot Data\Results\Albert\ZX 20200429 6600\ZX 20200429 6600 C 1A 9.wiff	9	27	3536	3536	3536	3536	9
	54	RESULTS_SEARCH_54_PARAMETERS_PEAKLIST_rawdatafilename		C:\AB SCIEX\ProteinPilot Data\Results\Albert\ZX 20200429 6600\ZX 20200429 6600 C 1A 9.wiff	9	27	3536	3536
	55	RESULTS_SEARCH_55_PARAMETERS_PEAKLIST_rawdatafilename		C:\AB SCIEX\ProteinPilot Data\Results\Albert\ZX 20200429 6600\ZX 20200429 6600 C 1A 9.wiff	9	28	3498	3498	3498	3498
	56	RESULTS_SEARCH_56_PARAMETERS_PEAKLIST_rawdatafilename		C:\AB SCIEX\ProteinPilot Data\Results\Albert\ZX 20200429 6600\ZX 20200429 6600 C 1A 9.wiff	9	28	3498	3498
	57	RESULTS_SEARCH_57_PARAMETERS_PEAKLIST_rawdatafilename		C:\AB SCIEX\ProteinPilot Data\Results\Albert\ZX 20200429 6600\ZX 20200429 6600 C 1A 10.wiff	10	29	2924	2924	2924	2924	10
	58	RESULTS_SEARCH_58_PARAMETERS_PEAKLIST_rawdatafilename		C:\AB SCIEX\ProteinPilot Data\Results\Albert\ZX 20200429 6600\ZX 20200429 6600 C 1A 10.wiff	10	29	2924	2924
	59	RESULTS_SEARCH_59_PARAMETERS_PEAKLIST_rawdatafilename		C:\AB SCIEX\ProteinPilot Data\Results\Albert\ZX 20200429 6600\ZX 20200429 6600 C 1A 10.wiff	10	30	2892	2892	2892	2892
	60	RESULTS_SEARCH_60_PARAMETERS_PEAKLIST_rawdatafilename		C:\AB SCIEX\ProteinPilot Data\Results\Albert\ZX 20200429 6600\ZX 20200429 6600 C 1A 10.wiff	10	30	2892	2892
	61	RESULTS_SEARCH_61_PARAMETERS_PEAKLIST_rawdatafilename		C:\AB SCIEX\ProteinPilot Data\Results\Albert\ZX 20200429 6600\ZX 20200429 6600 C 1A 11.wiff	11	31	3483	3483	3483	3483	11
	62	RESULTS_SEARCH_62_PARAMETERS_PEAKLIST_rawdatafilename		C:\AB SCIEX\ProteinPilot Data\Results\Albert\ZX 20200429 6600\ZX 20200429 6600 C 1A 11.wiff	11	31	3483	3483
	63	RESULTS_SEARCH_63_PARAMETERS_PEAKLIST_rawdatafilename		C:\AB SCIEX\ProteinPilot Data\Results\Albert\ZX 20200429 6600\ZX 20200429 6600 C 1A 11.wiff	11	32	3464	3464	3464	3464
	64	RESULTS_SEARCH_64_PARAMETERS_PEAKLIST_rawdatafilename		C:\AB SCIEX\ProteinPilot Data\Results\Albert\ZX 20200429 6600\ZX 20200429 6600 C 1A 11.wiff	11	32	3464	3464
	65	RESULTS_SEARCH_65_PARAMETERS_PEAKLIST_rawdatafilename		C:\AB SCIEX\ProteinPilot Data\Results\Albert\ZX 20200429 6600\ZX 20200429 6600 C 1A 12.wiff	12	33	3390	3390	3390	3390	12
	66	RESULTS_SEARCH_66_PARAMETERS_PEAKLIST_rawdatafilename		C:\AB SCIEX\ProteinPilot Data\Results\Albert\ZX 20200429 6600\ZX 20200429 6600 C 1A 12.wiff	12	33	3390	3390
	67	RESULTS_SEARCH_67_PARAMETERS_PEAKLIST_rawdatafilename		C:\AB SCIEX\ProteinPilot Data\Results\Albert\ZX 20200429 6600\ZX 20200429 6600 C 1A 12.wiff	12	34	3390	3390	3390	3390
	68	RESULTS_SEARCH_68_PARAMETERS_PEAKLIST_rawdatafilename		C:\AB SCIEX\ProteinPilot Data\Results\Albert\ZX 20200429 6600\ZX 20200429 6600 C 1A 12.wiff	12	34	3390	3390
	69	RESULTS_SEARCH_69_PARAMETERS_PEAKLIST_rawdatafilename		C:\AB SCIEX\ProteinPilot Data\Results\Albert\ZX 20200429 6600\ZX 20200429 6600 C 1A 12.wiff	12	35	3377	3377	3377	3377
	70	RESULTS_SEARCH_70_PARAMETERS_PEAKLIST_rawdatafilename		C:\AB SCIEX\ProteinPilot Data\Results\Albert\ZX 20200429 6600\ZX 20200429 6600 C 1A 12.wiff	12	35	3377	3377
	71	RESULTS_SEARCH_71_PARAMETERS_PEAKLIST_rawdatafilename		C:\AB SCIEX\ProteinPilot Data\Results\Albert\ZX 20200429 6600\ZX 20200429 6600 C 1A 12.wiff	12	36	3355	3355	3355	3355
	72	RESULTS_SEARCH_72_PARAMETERS_PEAKLIST_rawdatafilename		C:\AB SCIEX\ProteinPilot Data\Results\Albert\ZX 20200429 6600\ZX 20200429 6600 C 1A 12.wiff	12	36	3355	3355
	73	RESULTS_SEARCH_73_PARAMETERS_PEAKLIST_rawdatafilename		C:\AB SCIEX\ProteinPilot Data\Results\Albert\ZX 20200429 6600\ZX 20200429 6600 C 1A 13.wiff	13	37	3138	3138	3138	3138	13
	74	RESULTS_SEARCH_74_PARAMETERS_PEAKLIST_rawdatafilename		C:\AB SCIEX\ProteinPilot Data\Results\Albert\ZX 20200429 6600\ZX 20200429 6600 C 1A 13.wiff	13	37	3138	3138
	75	RESULTS_SEARCH_75_PARAMETERS_PEAKLIST_rawdatafilename		C:\AB SCIEX\ProteinPilot Data\Results\Albert\ZX 20200429 6600\ZX 20200429 6600 C 1A 13.wiff	13	38	3095	3095	3095	3095
	76	RESULTS_SEARCH_76_PARAMETERS_PEAKLIST_rawdatafilename		C:\AB SCIEX\ProteinPilot Data\Results\Albert\ZX 20200429 6600\ZX 20200429 6600 C 1A 13.wiff	13	38	3095	3095
	77	RESULTS_SEARCH_77_PARAMETERS_PEAKLIST_rawdatafilename		C:\AB SCIEX\ProteinPilot Data\Results\Albert\ZX 20200429 6600\ZX 20200429 6600 C 1A 13.wiff	13	39	3108	3108	3108	3108
	78	RESULTS_SEARCH_78_PARAMETERS_PEAKLIST_rawdatafilename		C:\AB SCIEX\ProteinPilot Data\Results\Albert\ZX 20200429 6600\ZX 20200429 6600 C 1A 13.wiff	13	39	3108	3108
	79	RESULTS_SEARCH_79_PARAMETERS_PEAKLIST_rawdatafilename		C:\AB SCIEX\ProteinPilot Data\Results\Albert\ZX 20200429 6600\ZX 20200429 6600 C 1A 13.wiff	13	40	3092	3092	3092	3092
	80	RESULTS_SEARCH_80_PARAMETERS_PEAKLIST_rawdatafilename		C:\AB SCIEX\ProteinPilot Data\Results\Albert\ZX 20200429 6600\ZX 20200429 6600 C 1A 13.wiff	13	40	3092	3092

## Sheet: Curated Metadata
Group file metadata term	Metadata Description (of raw extracted item)	Use Partial Match	Term in Stream	Derived (Calculated)	Value	Validation check/comments	Conversion type, if done	Conversion factor		Metadata Category	Metadata Description of Final Metadata Item (converted manually, if applicable)	Value
	Group filename			1						Attributes - General	Group filename	Source_File_2_Cavin1a.group
RESULTS_SEARCH_1_PARAMETERS_PARAGON_METHOD_SETTINGS_UI_START_TIME	Start date		1		2021-01-19 16:06:38					Attributes - General	Start date	2021-01-19 16:06:38
RESULTS_SEARCH_STAT_search_begin_time_clock	Start time		1		01/19/2021 16:06:38					Attributes - General	Start time	01/19/2021 16:06:38
RESULTS_SEARCH_1_PARAMETERS_PARAGON_METHOD_SETTINGS_UI_USER_NAME	User name		1		IMB-MASS02\massuser					Attributes - General	User name	IMB-MASS02\massuser
RESULTS_SEARCH_1_xml:id	Internal search identifier number		1	1						Attributes - General	Internal search identifier number
PARAMETERS_PEAKLIST_original_count				1						Attributes - Input data	Number of spectra in search	133996
PARAMETERS_PEAKLIST_count				1						Attributes - Input data	Number of non-empty spectra in search	133996
PARAMETERS_PEAKLIST_filenumber	Number of input files	1	1	1	13					Attributes - Input data	Number of input files	13
RESULTS_SEARCH_1_PARAMETERS_PARAGON_METHOD_SETTINGS_UI_SAMPLE_TYPE	Sample Type		1		Identification					Parameters - User settings	Sample Type	Identification
RESULTS_SEARCH_1_PARAMETERS_PARAGON_METHOD_SETTINGS_UI_CYS_ALKYLATION	Cysteine Alkylation		1		Iodoacetamide w other Cys mods possible					Parameters - User settings	Cysteine Alkylation	Iodoacetamide w other Cys mods possible
RESULTS_SEARCH_1_PARAMETERS_PARAGON_METHOD_SETTINGS_UI_DIGESTION	Digestion		1		Trypsin + Lys C					Parameters - User settings	Digestion	Trypsin + Lys C
RESULTS_SEARCH_1_PARAMETERS_PARAGON_METHOD_SETTINGS_UI_SPECIAL_FACTOR	Special Factors		1		Gel-based ID					Parameters - User settings	Special Factors	Gel-based ID
RESULTS_SEARCH_1_PARAMETERS_PARAGON_METHOD_SETTINGS_UI_INSTRUMENT	Instrument		1		TripleTOF 6600					Parameters - User settings	Instrument	TripleTOF 6600
RESULTS_SEARCH_1_PARAMETERS_PARAGON_METHOD_SETTINGS_UI_SPECIES	Species									Parameters - User settings	Species
RESULTS_SEARCH_1_PARAMETERS_PARAGON_METHOD_SETTINGS_UI_SEARCH_EFFORT	Search Effort		1		Thorough					Parameters - User settings	Search Effort	Thorough
RESULTS_SEARCH_1_PARAMETERS_PARAGON_METHOD_SETTINGS_UI_ID_FOCUS	ID Focus									Parameters - User settings	ID Focus
RESULTS_SEARCH_1_PARAMETERS_PARAGON_METHOD_SETTINGS_UI_MIN_UNUSED_PROTSCORE	Minimum Unused ProtScore		1		0.0458					Parameters - User settings	Minimum Unused ProtScore	0.0458
RESULTS_SEARCH_1_PARAMETERS_PARAGON_METHOD_SETTINGS_UI_PSPEP	FDR Analysis		1		TRUE		Logical to English			Parameters - User settings	FDR Analysis	Yes
	Quantitation						Logical to English			Parameters - User settings	Quantitation
RESULTS_SEARCH_1_PARAMETERS_QUANT_TYPE_background_correction	Background Correction		1		FALSE		Logical to English			Parameters - User settings	Background Correction	No
RESULTS_SEARCH_1_PARAMETERS_QUANT_TYPE_bias_correction	Bias Correction		1		TRUE		Logical to English			Parameters - User settings	Bias Correction	Yes
	Channel to use as denominator in ratios									Parameters - User settings	Channel to use as denominator in ratios
RESULTS_SEARCH_1_PARAMETERS_chemical_data_edited	Modified Data Dictionary or Parameter Translation		1		FALSE		Logical to English			Parameters - User settings	Modified Data Dictionary or Parameter Translation	No
RESULTS_SEARCH_1_PARAMETERS_FASTA_filename	Database filename		1		C:\AB SCIEX\ProteinPilot Data\SearchDatabases\uniprot-zebrafish_with_Clover.fasta					Attributes - Search database	Database filename	C:\AB SCIEX\ProteinPilot Data\SearchDatabases\uniprot-zebrafish_with_Clover.fasta
				1						Attributes - Search database	Number of Proteins in Database	75212
RESULTS_SEARCH_STAT_num_proteins	Number of proteins searched		1		150424					Attributes - Search database	Number of proteins searched	150424
				1						Attributes - Search database	Number of Residues in Database	37854281
RESULTS_SEARCH_STAT_num_residues	Number of residues searched		1		75708562					Attributes - Search database	Number of residues searched	75708562
RESULTS_SEARCH_STAT_computer_memory	RAM (MB)		1		32767					Attributes - Hardware	RAM (MB)	32767
RESULTS_SEARCH_STAT_computer_name	Computer name		1		IMB-MASS02					Attributes - Hardware	Computer name	IMB-MASS02
RESULTS_SEARCH_STAT_number_cores	Number of cores in computer		1		8					Attributes - Hardware	Number of cores in computer	8
RESULTS_SEARCH_STAT_number_processors	Number of threads (double cores if hyperthreading on)		1		8					Attributes - Hardware	Number of threads (double cores if hyperthreading on)	8
RESULTS_SEARCH_STAT_number_licensed_tasks	Number of cores licensed to use		1		16					Attributes - Software environment	Number of cores licensed to use	16
RESULTS_SEARCH_STAT_os	Operating system		1		Windows Server 2008 R2 Standard (6.1.7600)					Attributes - Software environment	Operating system	Windows Server 2008 R2 Standard (6.1.7600)
RESULTS_SEARCH_1_PARAMETERS_VERSION	ProteinPilot Software Version		1		5.0.1.0, 4895					Attributes - Software environment	ProteinPilot Software Version	5.0.1.0, 4895
RESULTS_SEARCH_1_PARAMETERS_PARAGON_VERSION	Paragon Algorithm Version		1		5.0.1.0, 4874					Attributes - Software environment	Paragon Algorithm Version	5.0.1.0, 4874
RESULTS_SEARCH_1_PARAMETERS_APPLICATION	Application name		1		ProteinPilot(tm) Software					Attributes - Software environment	Application name	ProteinPilot(tm) Software
RESULTS_GROUPRESULTSUMMARY_1_confidence	Confidence of first row in summary statistics ID statistics		1		0.99		Fraction to %	100		Statistics - Protein Summary Table	Percent Confidence of first row in Summary Statistics ID Statistics	99
RESULTS_GROUPRESULTSUMMARY_1_distinctpeptides	Distinct peptides associated with 99% confidence proteins		1		2438					Statistics - Protein Summary Table	Distinct peptides associated with 99% confidence proteins	2438
RESULTS_GROUPRESULTSUMMARY_1_proteinsbeforegroupping	Proteins before grouping (99% confidence)		1		455					Statistics - Protein Summary Table	Proteins before grouping (99% confidence)	455
RESULTS_GROUPRESULTSUMMARY_1_proteinsidentified	Proteins detected (99% confidence)		1		79					Statistics - Protein Summary Table	Proteins detected (99% confidence)	79
RESULTS_GROUPRESULTSUMMARY_1_spectraidentified	Spectra associated with 99% confidence proteins		1		36392					Statistics - Protein Summary Table	Spectra associated with 99% confidence proteins	36392
RESULTS_GROUPRESULTSUMMARY_2_confidence	Confidence of second row in Summary Statistics ID statistics		1		0.95		Fraction to %	100		Statistics - Protein Summary Table	Percent Confidence of first row in Summary Statistics ID Statistics	95
RESULTS_GROUPRESULTSUMMARY_2_distinctpeptides	Distinct peptides associated with 95% confidence proteins		1		2468					Statistics - Protein Summary Table	Distinct peptides associated with 95% confidence proteins	2468
RESULTS_GROUPRESULTSUMMARY_2_proteinsbeforegroupping	Proteins before grouping (95% confidence)		1		542					Statistics - Protein Summary Table	Proteins before grouping (95% confidence)	542
RESULTS_GROUPRESULTSUMMARY_2_proteinsidentified	Proteins detected (95% confidence)		1		98					Statistics - Protein Summary Table	Proteins detected (95% confidence)	98
RESULTS_GROUPRESULTSUMMARY_2_spectraidentified	Spectra associated with 95% confidence proteins		1		36717					Statistics - Protein Summary Table	Spectra associated with 95% confidence proteins	36717
RESULTS_GROUPRESULTSUMMARY_3_confidence	Confidence of third row in summary statistics ID statistics		1		0.66		Fraction to %	100		Statistics - Protein Summary Table	Percent Confidence of first row in Summary Statistics ID Statistics	66
RESULTS_GROUPRESULTSUMMARY_3_distinctpeptides	Distinct peptides associated with 66% confidence proteins		1		2509					Statistics - Protein Summary Table	Distinct peptides associated with 66% confidence proteins	2509
RESULTS_GROUPRESULTSUMMARY_3_proteinsbeforegroupping	Proteins before grouping (66% confidence)		1		604					Statistics - Protein Summary Table	Proteins before grouping (66% confidence)	604
RESULTS_GROUPRESULTSUMMARY_3_proteinsidentified	Proteins detected (66% confidence)		1		112					Statistics - Protein Summary Table	Proteins detected (66% confidence)	112
RESULTS_GROUPRESULTSUMMARY_3_spectraidentified	Spectra associated with 66% confidence proteins		1		36924					Statistics - Protein Summary Table	Spectra associated with 66% confidence proteins	36924
RESULTS_GROUPRESULTSUMMARY_4_confidence	Confidence of fourth row in Summary Statistics ID statistics		1		0.100088		Fraction to %	100		Statistics - Protein Summary Table	Percent Confidence of first row in Summary Statistics ID Statistics	10.0088
RESULTS_GROUPRESULTSUMMARY_4_distinctpeptides	Distinct peptides associated with 10% confidence proteins		1		2611					Statistics - Protein Summary Table	Distinct peptides associated with 10% confidence proteins	2611
RESULTS_GROUPRESULTSUMMARY_4_proteinsbeforegroupping	Proteins before grouping (10% confidence)		1		817					Statistics - Protein Summary Table	Proteins before grouping (10% confidence)	817
RESULTS_GROUPRESULTSUMMARY_4_proteinsidentified	Proteins detected (10% confidence)		1		153					Statistics - Protein Summary Table	Proteins detected (10% confidence)	153
RESULTS_GROUPRESULTSUMMARY_4_spectraidentified	Spectra associated with 10% confidence proteins		1		39079					Statistics - Protein Summary Table	Spectra associated with 10% confidence proteins	39079
PARAMETERS_PEAKLIST_partnumber	Number of segments the input data are broken into	1	1	1	40					Parameters - Search Dimension Factors	Number of segments the input data are broken into	40
				1						Parameters - Search Dimension Factors	Number of searches per segment (2 for Thorough, 1 for Rapid)	2
				1						Parameters - Search Dimension Factors	Number of apparent sub-searches in group file	80
RESULTS_SEARCH_1_PARAMETERS_do_reverse_search	Do reversed search		1		TRUE					Parameters - Search Dimension Factors	Do reversed search	TRUE
RESULTS_SEARCH_1_PARAMETERS_QUANT_TYPE_separate_searches	Do separate searches for each plex in MS1 quantitation		1		FALSE					Parameters - Search Dimension Factors	Do separate searches for each plex in MS1 quantitation	FALSE
RESULTS_SEARCH_1_PARAMETERS_maxresults	Maximum number of hypotheses to keep per spectrum		1		15					Parameters - Search Dimension Factors	Maximum number of hypotheses to keep per spectrum	15
RESULTS_SEARCH_1_PARAMETERS_MSTOLERANCE_type	MS1 initial mass error tolerance type		1		dalton					Parameters - Identification - Mass accuracy	MS1 initial mass error tolerance type	dalton
RESULTS_SEARCH_1_PARAMETERS_MSTOLERANCE_value	MS1 initial mass error tolerance value		1		0.05					Parameters - Identification - Mass accuracy	MS1 initial mass error tolerance value	0.05
RESULTS_SEARCH_1_PARAMETERS_MSMSTOLERANCE_type	MS2 initial mass error tolerance type		1		dalton					Parameters - Identification - Mass accuracy	MS2 initial mass error tolerance type	dalton
RESULTS_SEARCH_1_PARAMETERS_MSMSTOLERANCE_value	MS2 initial mass error tolerance value		1		0.1					Parameters - Identification - Mass accuracy	MS2 initial mass error tolerance value	0.1
RESULTS_SEARCH_1_PARAMETERS_MS_STANDARD_DEVIATION_type	MS1 final mass error standard deviation type		1		dalton					Parameters - Identification - Mass accuracy	MS1 final mass error standard deviation type	dalton
RESULTS_SEARCH_1_PARAMETERS_MS_STANDARD_DEVIATION_value	MS1 final mass error standard deviation value		1		0.0011					Parameters - Identification - Mass accuracy	MS1 final mass error standard deviation value	0.0011
RESULTS_SEARCH_1_PARAMETERS_MSMS_STANDARD_DEVIATION_type	MS2 final mass error standard deviation type		1		dalton					Parameters - Identification - Mass accuracy	MS2 final mass error standard deviation type	dalton
RESULTS_SEARCH_1_PARAMETERS_MSMS_STANDARD_DEVIATION_value	MS2 final mass error standard deviation value		1		0.01					Parameters - Identification - Mass accuracy	MS2 final mass error standard deviation value	0.01
RESULTS_SEARCH_1_PARAMETERS_do_multiprecursor_search	Use multi-precursor search function		1		TRUE					Parameters - Identification - Multi-precursor search	Use multi-precursor search function	TRUE
RESULTS_SEARCH_1_PARAMETERS_MAX_PRECURSORS_FRAGLET	Maximum number of different precursor masses to try to match to in the Fraglet stage when doing multi-precursor search		1		5					Parameters - Identification - Multi-precursor search	Maximum number of different precursor masses to try to match to in the Fraglet stage when doing multi-precursor search	5
RESULTS_SEARCH_1_PARAMETERS_PRECURSORS_DR_FRAGLET	Maximum dynamic range gap of secondary precursors vs primary precursor in the Fraglet stage when doing multi-precursor search		1		10					Parameters - Identification - Multi-precursor search	Maximum dynamic range gap of secondary precursors vs primary precursor in the Fraglet stage when doing multi-precursor search	10
RESULTS_SEARCH_1_PARAMETERS_MAX_PRECURSORS_TAGLET	Maximum number of different precursor masses to try to match to in the Taglet stage when doing multi-precursor search		1		1					Parameters - Identification - Multi-precursor search	Maximum number of different precursor masses to try to match to in the Taglet stage when doing multi-precursor search	1
RESULTS_SEARCH_1_PARAMETERS_PRECURSORS_DR_TAGLET	Maximum dynamic range gap of secondary precursors vs primary precursor in the Taglet stage when doing multi-precursor search		1		3					Parameters - Identification - Multi-precursor search	Maximum dynamic range gap of secondary precursors vs primary precursor in the Taglet stage when doing multi-precursor search	3
RESULTS_SEARCH_1_PARAMETERS_DEFAULT_CHARGE_STATE_1_charge	First charge state to consider when precursor z is not determined		1		2					Parameters - Identification - Charge ambiguity	First charge state to consider when precursor z is not determined	2
RESULTS_SEARCH_1_PARAMETERS_DEFAULT_CHARGE_STATE_1_probability	Probability of first charge state to consider when precursor z is not determined		1		1					Parameters - Identification - Charge ambiguity	Probability of first charge state to consider when precursor z is not determined	1
RESULTS_SEARCH_1_PARAMETERS_DEFAULT_CHARGE_STATE_2_charge	Second charge state to consider when precursor z is not determined		1		3					Parameters - Identification - Charge ambiguity	Second charge state to consider when precursor z is not determined	3
RESULTS_SEARCH_1_PARAMETERS_DEFAULT_CHARGE_STATE_2_probability	Probability of second charge state to consider when precursor z is not determined		1		1					Parameters - Identification - Charge ambiguity	Probability of second charge state to consider when precursor z is not determined	1
RESULTS_SEARCH_1_PARAMETERS_DEFAULT_CHARGE_STATE_3_charge	Third charge state to consider when precursor z is not determined		1		4					Parameters - Identification - Charge ambiguity	Third charge state to consider when precursor z is not determined	4
RESULTS_SEARCH_1_PARAMETERS_DEFAULT_CHARGE_STATE_3_probability	Probability of third charge state to consider when precursor z is not determined		1		1					Parameters - Identification - Charge ambiguity	Probability of third charge state to consider when precursor z is not determined	1
RESULTS_SEARCH_1_PARAMETERS_DEFAULT_CHARGE_STATE_4_charge	Fourth charge state to consider when precursor z is not determined									Parameters - Identification - Charge ambiguity	Fourth charge state to consider when precursor z is not determined
RESULTS_SEARCH_1_PARAMETERS_DEFAULT_CHARGE_STATE_4_probability	Probability of fourth charge state to consider when precursor z is not determined									Parameters - Identification - Charge ambiguity	Probability of fourth charge state to consider when precursor z is not determined
RESULTS_SEARCH_1_PARAMETERS_PROGROUP_bayesconfidencecalclulation	Use Bayesian protein confidence calculation		1		TRUE					Parameters - Protein Grouping	Use Bayesian protein confidence calculation	TRUE
RESULTS_SEARCH_1_PARAMETERS_PROGROUP_calibrateconfidence	Use peptide FDR analysis to recalibrate peptide confidences		1		TRUE					Parameters - Protein Grouping	Use peptide FDR analysis to recalibrate peptide confidences	TRUE
RESULTS_SEARCH_1_PARAMETERS_PROGROUP_focusingintersection	In mid-Pro Group, minimum Intersection ProtScore to be in Same Group		1		4					Parameters - Protein Grouping	In mid-Pro Group, minimum Intersection ProtScore to be in Same Group	4
RESULTS_SEARCH_1_PARAMETERS_PROGROUP_focusingminunusedprotscore	In mid-Pro Group, minimum Unused ProtScore to keep a Group		1		0.1					Parameters - Protein Grouping	In mid-Pro Group, minimum Unused ProtScore to keep a Group	0.1
RESULTS_SEARCH_1_PARAMETERS_PROGROUP_focusingsubsetcutoff	In mid-Pro Group, keep competitor proteins with ProtScore units from winner		1		6					Parameters - Protein Grouping	In mid-Pro Group, keep competitor proteins with ProtScore units from winner	6
RESULTS_SEARCH_1_PARAMETERS_PROGROUP_intersection	In final Pro Group, minimum Intersection ProtScore to be in same group		1		1.3					Parameters - Protein Grouping	In final Pro Group, minimum Intersection ProtScore to be in same group	1.3
RESULTS_SEARCH_1_PARAMETERS_PROGROUP_minunusedprotscore	In final Pro Group, minimum Unused ProtScore to keep a group		1		0.0458					Parameters - Protein Grouping	In final Pro Group, minimum Unused ProtScore to keep a group	0.0458
RESULTS_SEARCH_1_PARAMETERS_PROGROUP_subsetcutoff	In final Pro Group, keep competitor proteins with ProtScore units from winner		1		2					Parameters - Protein Grouping	In final Pro Group, keep competitor proteins with ProtScore units from winner	2
RESULTS_SEARCH_1_PARAMETERS_QUANT_TYPE_background_correction	Do isobaric quant background correction algorithm		1		FALSE					Parameters - Quantitation - processing	Do isobaric quant background correction algorithm	FALSE
RESULTS_SEARCH_1_PARAMETERS_QUANT_TYPE_bias_correction	Normalize the central tendency of protein ratios to be unity		1		TRUE					Parameters - Quantitation - processing	Normalize the central tendency of protein ratios to be unity	TRUE
RESULTS_SEARCH_1_PARAMETERS_QUANT_TYPE_median_statistic	Compute protein-level ratios from the median of peptide ratios		1		TRUE					Parameters - Quantitation - processing	Compute protein-level ratios from the median of peptide ratios	TRUE
RESULTS_SEARCH_1_PARAMETERS_QUANT_TYPE_quant_threshold	Quant threshold setting no longer used		1		-1					Parameters - Quantitation - processing	Quant threshold setting no longer used	-1
RESULTS_SEARCH_1_PARAMETERS_QUANT_TYPE_quant_threshold_sn	Use measures for quantitation if signal to noise is greater than		1		9					Parameters - Quantitation - processing	Use measures for quantitation if signal to noise is greater than	9
RESULTS_SEARCH_1_PARAMETERS_max_quant_labels	Maximum number of labels allowed on a peptide for it to be used for quantitation		1		35					Parameters - Quantitation - curation	Maximum number of labels allowed on a peptide for it to be used for quantitation	35
RESULTS_SEARCH_1_PARAMETERS_QUANT_TYPE_keep_extreme_peptides_over_fraction	Include extreme ratios in the protein ratio calculation if the fraction of peptides from a protein having extreme ratios is greater than		1		0					Parameters - Quantitation - curation	Include extreme ratios in the protein ratio calculation if the fraction of peptides from a protein having extreme ratios is greater than	0
RESULTS_SEARCH_1_PARAMETERS_QUANT_TYPE_low_confidence_check	Exclude quantitation data if identification confidence does not pass a threshold value		1		TRUE					Parameters - Quantitation - curation	Exclude quantitation data if identification confidence does not pass a threshold value	TRUE
RESULTS_SEARCH_1_PARAMETERS_QUANT_TYPE_low_intensity_check	Exclude quantitation data if a minimum intensity is not passed		1		TRUE					Parameters - Quantitation - curation	Exclude quantitation data if a minimum intensity is not passed	TRUE
RESULTS_SEARCH_1_PARAMETERS_QUANT_TYPE_mod_check	Exclude quantitation data based on discordant peptide logic		1		TRUE					Parameters - Quantitation - curation	Exclude quantitation data based on discordant peptide logic	TRUE
RESULTS_SEARCH_1_PARAMETERS_QUANT_TYPE_shared_msms_check	Exclude quantitation data using sharing logic		1		TRUE					Parameters - Quantitation - curation	Exclude quantitation data using sharing logic	TRUE
RESULTS_SEARCH_1_PARAMETERS_PROGROUP_unusedprotscorethresholdforexcludingothersfromquant	Minimum protein confidence to consider a protein confident and capable of excluding spectra as shared		1		1.3					Parameters - Quantitation - curation	Minimum protein confidence to consider a protein confident and capable of excluding spectra as shared	1.3
RESULTS_SEARCH_1_PARAMETERS_PROGROUP_confidencepercentthresholdforexcludingothersfromquant	Minimum peptide percent confidence from a confident protein to consider a spectrum shared		1		15					Parameters - Quantitation - curation	Minimum peptide percent confidence from a confident protein to consider a spectrum shared	15
RESULTS_SEARCH_1_PARAMETERS_PROGROUP_confidencepercentthresholdforincludingselfinquant	Minimum peptide confidence to be used for quantitation		1		15					Parameters - Quantitation - curation	Minimum peptide confidence to be used for quantitation	15
RESULTS_SEARCH_1_PARAMETERS_PROGROUP_autodiscordantpeptidethreshold	Consider a peptide discordant if joint feature probability less than		1		0.3					Parameters - Quantitation - curation	Consider a peptide discordant if joint feature probability less than	0.3
RESULTS_SEARCH_1_PARAMETERS_PROGROUP_compresspeptides	Show results only for distinct peptides, suppressing redundancy		1		FALSE					Parameters - Non-functional	Show results only for distinct peptides, suppressing redundancy	FALSE
RESULTS_SEARCH_1_PARAMETERS_PROGROUP_donotstoremspeaklists	Do not store MS1 level data		1		FALSE					Parameters - Non-functional	Do not store MS1 level data	FALSE
RESULTS_SEARCH_STAT_search_begin_time_clock	Start time - Search		1		01/19/2021 16:06:38					Statistics - Processing Times - Start&Stop Clock Times	Start time - Search	01/19/2021 16:06:38
RESULTS_SEARCH_STAT_search_end_time_clock	End time - Search		1		01/20/2021 16:58:09					Statistics - Processing Times - Start&Stop Clock Times	End time - Search	01/20/2021 16:58:09
RESULTS_SEARCH_STAT_stage_searching_begin_time_clock	Start time - Identification algorithm stages		1		01/20/2021 15:00:55					Statistics - Processing Times - Start&Stop Clock Times	Start time - Identification algorithm stages	01/20/2021 15:00:55
RESULTS_SEARCH_STAT_stage_searching_end_time_clock	End time - Identification algorithm stages		1		01/20/2021 16:53:22					Statistics - Processing Times - Start&Stop Clock Times	End time - Identification algorithm stages	01/20/2021 16:53:22
RESULTS_SEARCH_STAT_stage_signal_processing_begin_time_clock	Start time - Signal processing stage		1		01/19/2021 16:06:39					Statistics - Processing Times - Start&Stop Clock Times	Start time - Signal processing stage	01/19/2021 16:06:39
RESULTS_SEARCH_STAT_stage_signal_processing_end_time_clock	End time - Signal processing stage		1		01/20/2021 14:58:49					Statistics - Processing Times - Start&Stop Clock Times	End time - Signal processing stage	01/20/2021 14:58:49
RESULTS_SEARCH_STAT_stage_waiting_begin_time_clock	Start time - Waiting stage		1		01/20/2021 14:58:49					Statistics - Processing Times - Start&Stop Clock Times	Start time - Waiting stage	01/20/2021 14:58:49
RESULTS_SEARCH_STAT_stage_waiting_end_time_clock	End time - Waiting stage		1		01/20/2021 15:00:55					Statistics - Processing Times - Start&Stop Clock Times	End time - Waiting stage	01/20/2021 15:00:55
RESULTS_SEARCH_STAT_task_fraglet_exe_begin_time_clock	Start time - Fraglet Algorithm search stage		1		01/20/2021 14:58:58					Statistics - Processing Times - Start&Stop Clock Times	Start time - Fraglet Algorithm search stage	01/20/2021 14:58:58
RESULTS_SEARCH_STAT_task_fraglet_exe_end_time_clock	End time - Fraglet Algorithm search stage		1		01/20/2021 15:25:55					Statistics - Processing Times - Start&Stop Clock Times	End time - Fraglet Algorithm search stage	01/20/2021 15:25:55
RESULTS_SEARCH_STAT_task_focusing_begin_time_clock	Start time - Mid-Pro Group Algorithm stage		1		01/20/2021 15:25:55					Statistics - Processing Times - Start&Stop Clock Times	Start time - Mid-Pro Group Algorithm stage	01/20/2021 15:25:55
RESULTS_SEARCH_STAT_task_focusing_end_time_clock	End time - Mid-Pro Group Algorithm stage		1		01/20/2021 15:36:10					Statistics - Processing Times - Start&Stop Clock Times	End time - Mid-Pro Group Algorithm stage	01/20/2021 15:36:10
RESULTS_SEARCH_STAT_task_taglet_exe_begin_time_clock	Start time - Taglet Algorithm search stage		1		01/20/2021 15:36:10					Statistics - Processing Times - Start&Stop Clock Times	Start time - Taglet Algorithm search stage	01/20/2021 15:36:10
RESULTS_SEARCH_STAT_task_taglet_exe_end_time_clock	End time - Taglet Algorithm search stage		1		01/20/2021 16:19:16					Statistics - Processing Times - Start&Stop Clock Times	End time - Taglet Algorithm search stage	01/20/2021 16:19:16
RESULTS_SEARCH_STAT_task_progroup_begin_time_clock	Start time - Final Pro Group Algorithm stage		1		01/20/2021 16:19:16					Statistics - Processing Times - Start&Stop Clock Times	Start time - Final Pro Group Algorithm stage	01/20/2021 16:19:16
RESULTS_SEARCH_STAT_task_progroup_end_time_clock	End time - Final Pro Group Algorithm stage		1		01/20/2021 16:53:22					Statistics - Processing Times - Start&Stop Clock Times	End time - Final Pro Group Algorithm stage	01/20/2021 16:53:22
RESULTS_SEARCH_STAT_stage_fdr_begin_time_clock	Start time - FDR analysis stage		1		01/20/2021 16:53:24					Statistics - Processing Times - Start&Stop Clock Times	Start time - FDR analysis stage	01/20/2021 16:53:24
RESULTS_SEARCH_STAT_stage_fdr_end_time_clock	End time - FDR analysis stage		1		01/20/2021 16:58:09					Statistics - Processing Times - Start&Stop Clock Times	End time - FDR analysis stage	01/20/2021 16:58:09
RESULTS_SEARCH_STAT_search_time_duration	Clock Time Duration for Full Search (ms)		1		89491326		msec to min	1.66667e-05		Statistics - Processing Times - Duration in Real Clock Times	Clock time duration - Full search (min)	1491.52
RESULTS_SEARCH_STAT_stage_searching_time_duration	Clock Time Duration for Identification Algorithm Stages (ms)		1		6747056		msec to min	1.66667e-05		Statistics - Processing Times - Duration in Real Clock Times	Clock time duration - Identification algorithm stages (min)	112.451
RESULTS_SEARCH_STAT_stage_signal_processing_time_duration	Clock Time Duration for Waiting Stage (ms)		1		82330495		msec to min	1.66667e-05		Statistics - Processing Times - Duration in Real Clock Times	Clock time duration - Signal processing stage (min)	1372.17
RESULTS_SEARCH_STAT_stage_waiting_time_duration	Clock Time Duration for Signal Processing Stage (ms)		1		126021		msec to min	1.66667e-05		Statistics - Processing Times - Duration in Real Clock Times	Clock time duration - Waiting stage (min)	2.10035
RESULTS_SEARCH_STAT_task_fraglet_exe_time_duration	Clock Time Duration for Fraglet Algorithm Stage (ms)		1		1616705		msec to min	1.66667e-05		Statistics - Processing Times - Duration in Real Clock Times	Clock time duration - Fraglet Algorithm stage (min)	26.9451
RESULTS_SEARCH_STAT_task_focusing_time_duration	Clock Time Duration for Mid-Pro Group Algorithm Stage (ms)		1		615100		msec to min	1.66667e-05		Statistics - Processing Times - Duration in Real Clock Times	Clock time duration - Mid-Pro Group Algorithm stage (min)	10.2517
RESULTS_SEARCH_STAT_task_taglet_exe_time_duration	Clock Time Duration for Taglet Algorithm Stage (ms)		1		2585471		msec to min	1.66667e-05		Statistics - Processing Times - Duration in Real Clock Times	Clock time duration - Taglet Algorithm stage (min)	43.0912
RESULTS_SEARCH_STAT_task_progroup_time_duration	Clock Time Duration for Pro Group Algorithm Stage (ms)		1		2046174		msec to min	1.66667e-05		Statistics - Processing Times - Duration in Real Clock Times	Clock time duration - Pro Group Algorithm stage (min)	34.1029
RESULTS_SEARCH_STAT_stage_fdr_time_duration	Clock Time Duration for FDR Analysis (ms)		1		285490		msec to min	1.66667e-05		Statistics - Processing Times - Duration in Real Clock Times	Clock time duration - FDR Analysis (min)	4.75817
				1						Statistics - Processing Times - Duration in Real Clock Times	Clock time not accounted for in measured stages	-1.90217
	CPU Time Duration for Signal Processing Stage (ms)						msec to min	1.66667e-05		Statistics - Processing Times - Duration in CPU Time	CPU time duration - Signal Processing stage (min)
RESULTS_SEARCH_STAT_task_fraglet_exe_time_cpu	CPU Time Duration for Fraglet Algorithm Stage (ms)		1		9013566		msec to min	1.66667e-05		Statistics - Processing Times - Duration in CPU Time	CPU time duration - Fraglet Algorithm stage (min)	150.226
RESULTS_SEARCH_STAT_task_focusing_time_cpu	CPU Time Duration for Mid-Pro Group Algorithm Stage (ms)		1		503867		msec to min	1.66667e-05		Statistics - Processing Times - Duration in CPU Time	CPU time duration - Mid-Pro Group Algorithm stage (min)	8.39778
RESULTS_SEARCH_STAT_task_taglet_exe_time_cpu	CPU Time Duration for Taglet Algorithm Stage (ms)		1		13367881		msec to min	1.66667e-05		Statistics - Processing Times - Duration in CPU Time	CPU time duration - Taglet Algorithm stage (min)	222.798
RESULTS_SEARCH_STAT_task_progroup_time_cpu	CPU Time Duration for Pro Group Algorithm Stage (ms)		1		841874		msec to min	1.66667e-05		Statistics - Processing Times - Duration in CPU Time	CPU time duration - Pro Group Algorithm stage (min)	14.0312
				1						Statistics - Processing Times - Percent by Stage	Percent of clock time - Identification Algorithm stages	0.0753934
				1						Statistics - Processing Times - Percent by Stage	Percent of clock time - Signal Processing stage	0.919983
				1						Statistics - Processing Times - Percent by Stage	Percent of clock time - Waiting stage	0.00140819
				1						Statistics - Processing Times - Percent by Stage	Percent of clock time - Fraglet Algorithm stage	0.0180655
				1						Statistics - Processing Times - Percent by Stage	Percent of clock time - Mid-Pro Group Algorithm stage	0.00687329
				1						Statistics - Processing Times - Percent by Stage	Percent of clock time - Taglet Algorithm stage	0.0288907
				1						Statistics - Processing Times - Percent by Stage	Percent of clock time - Pro Group Algorithm stage	0.0228645
				1						Statistics - Processing Times - Percent by Stage	Percent of clock time - FDR Analysis	0.00319014
				1						Statistics - Processing Rate - Clock (Sec/Spectrum)	Clock time rate (sec/spect) - Full Search	0.667866
				1						Statistics - Processing Rate - Clock (Sec/Spectrum)	Clock time rate (sec/spect) - Identification Algorithm stages	0.0503527
				1						Statistics - Processing Rate - Clock (Sec/Spectrum)	Clock time rate (sec/spect) - Signal processing stage	0.614425
				1						Statistics - Processing Rate - Clock (Sec/Spectrum)	Clock time rate (sec/spect) - Waiting stage	0.000940483
				1						Statistics - Processing Rate - Clock (Sec/Spectrum)	Clock time rate (sec/spect) - Fraglet Algorithm stage	0.0120653
				1						Statistics - Processing Rate - Clock (Sec/Spectrum)	Clock time rate (sec/spect) - Mid-Pro Group Algorithm stage	0.00459044
				1						Statistics - Processing Rate - Clock (Sec/Spectrum)	Clock time rate (sec/spect) - Taglet Algorithm stage	0.0192951
				1						Statistics - Processing Rate - Clock (Sec/Spectrum)	Clock time rate (sec/spect) - Pro Group Algorithm stage	0.0152704
				1						Statistics - Processing Rate - Clock (Sec/Spectrum)	Clock time rate (sec/spect) - FDR Analysis	0.00213059
				1						Statistics - Processing Rate - CPU (Sec/Spectrum)	CPU time rate (sec/spect) - Signal processing stage
				1						Statistics - Processing Rate - CPU (Sec/Spectrum)	CPU time rate (sec/spect) - Fraglet Algorithm stage	0.0672674
				1						Statistics - Processing Rate - CPU (Sec/Spectrum)	CPU time rate (sec/spect) - Mid-Pro Group Algorithm stage	0.00376031
				1						Statistics - Processing Rate - CPU (Sec/Spectrum)	CPU time rate (sec/spect) - Taglet Algorithm stage	0.0997633
				1						Statistics - Processing Rate - CPU (Sec/Spectrum)	CPU time rate (sec/spect) - Pro Group Algorithm stage	0.00628283
				1						Statistics - Processing Rate - Clock (Sec/Spectrum/DB Protein)	Clock time rate (sec/spect/DB protein) - Full search	4.43989e-06
				1						Statistics - Processing Rate - Clock (Sec/Spectrum/DB Protein)	Clock time rate (sec/spect/DB protein) - Identification algorithm stages	3.34738e-07
				1						Statistics - Processing Rate - Clock (Sec/Spectrum/DB Protein)	Clock time rate (sec/spect/DB protein) - Signal processing stage	4.08462e-06
				1						Statistics - Processing Rate - Clock (Sec/Spectrum/DB Protein)	Clock time rate (sec/spect/DB protein) - Waiting stage	6.25222e-09
				1						Statistics - Processing Rate - Clock (Sec/Spectrum/DB Protein)	Clock time rate (sec/spect/DB protein) - Fraglet Algorithm stage	8.02088e-08
				1						Statistics - Processing Rate - Clock (Sec/Spectrum/DB Protein)	Clock time rate (sec/spect/DB protein) - Mid-Pro Group Algorithm stage	3.05166e-08
				1						Statistics - Processing Rate - Clock (Sec/Spectrum/DB Protein)	Clock time rate (sec/spect/DB protein) - Taglet Algorithm stage	1.28272e-07
				1						Statistics - Processing Rate - Clock (Sec/Spectrum/DB Protein)	Clock time rate (sec/spect/DB protein) - Pro Group Algorithm stage	1.01516e-07
				1						Statistics - Processing Rate - Clock (Sec/Spectrum/DB Protein)	Clock time rate (sec/spect/DB protein) - FDR Analysis	1.41639e-08
				1						Statistics - Processing Rate - CPU (Sec/Spectrum/DB Protein)	CPU time rate (sec/spect/DB protein) - Signal processing stage
				1						Statistics - Processing Rate - CPU (Sec/Spectrum/DB Protein)	CPU time rate (sec/spect/DB protein) - Fraglet Algorithm stage	4.47185e-07
				1						Statistics - Processing Rate - CPU (Sec/Spectrum/DB Protein)	CPU time rate (sec/spect/DB protein) - Mid-Pro Group Algorithm stage	2.49981e-08
				1						Statistics - Processing Rate - CPU (Sec/Spectrum/DB Protein)	CPU time rate (sec/spect/DB protein) - Taglet Algorithm stage	6.63214e-07
				1						Statistics - Processing Rate - CPU (Sec/Spectrum/DB Protein)	CPU time rate (sec/spect/DB protein) - Pro Group Algorithm stage	4.17675e-08
				1						Statistics - Extent of Distribution - Fundamental	Distribution factor - CPU vs. clock time - Signal processing stage
				1						Statistics - Extent of Distribution - Fundamental	Distribution factor - CPU vs. clock time - Fraglet Algorithm stage	5.57527
				1						Statistics - Extent of Distribution - Fundamental	Distribution factor - CPU vs. clock time - Mid-Pro Group Algorithm stage	0.819163
				1						Statistics - Extent of Distribution - Fundamental	Distribution factor - CPU vs. clock time - Taglet Algorithm stage	5.17039
				1						Statistics - Extent of Distribution - Fundamental	Distribution factor - CPU vs. clock time - Pro Group Algorithm stage	0.411438
				1						Statistics - Extent of Distribution - vs Segments	Ratio of distribution factor to number of search segments - Signal processing stage
				1						Statistics - Extent of Distribution - vs Segments	Ratio of distribution factor to number of search segments - Fraglet Algorithm stage	0.139382
				1						Statistics - Extent of Distribution - vs Segments	Ratio of distribution factor to number of search segments - Mid-Pro Group Algorithm stage	0.0204791
				1						Statistics - Extent of Distribution - vs Segments	Ratio of distribution factor to number of search segments - Taglet Algorithm stage	0.12926
				1						Statistics - Extent of Distribution - vs Segments	Ratio of distribution factor to number of search segments - Pro Group Algorithm stage	0.010286
				1						Statistics - Extent of Distribution - vs Licensed Cores	Ratio of distribution factor to number of licensed cores - Signal processing stage
				1						Statistics - Extent of Distribution - vs Licensed Cores	Ratio of distribution factor to number of licensed cores - Fraglet Algorithm stage	0.348454
				1						Statistics - Extent of Distribution - vs Licensed Cores	Ratio of distribution factor to number of licensed cores - Mid-Pro Group Algorithm stage	0.0511977
				1						Statistics - Extent of Distribution - vs Licensed Cores	Ratio of distribution factor to number of licensed cores - Taglet Algorithm stage	0.323149
				1						Statistics - Extent of Distribution - vs Licensed Cores	Ratio of distribution factor to number of licensed cores - Pro Group Algorithm stage	0.0257149
PARAMETERS_PEAKLIST_original_count	Average number of spectra per segment	1	1	1	3349.9					Statistics - Search Segmentation	Average number of spectra per segment	3349.9
PARAMETERS_PEAKLIST_original_count	Standard deviation of number of spectra per segment	1	1	1	272.997					Statistics - Search Segmentation	Standard deviation of number of spectra per segment	272.997
PARAMETERS_PEAKLIST_original_count	Maximum number of spectra per segment	1	1	1	3812					Statistics - Search Segmentation	Maximum number of spectra per segment	3812
PARAMETERS_PEAKLIST_original_count	Minimum number of spectra per segment	1	1	1	2892					Statistics - Search Segmentation	Minimum number of spectra per segment	2892
										Attributes - Input data filenames	Filename of Input File 1	C:\AB SCIEX\ProteinPilot Data\Results\Albert\ZX 20200429 6600\ZX 20200429 6600 C 1A 1.wiff
										Attributes - Input data filenames	Filename of Input File 2	C:\AB SCIEX\ProteinPilot Data\Results\Albert\ZX 20200429 6600\ZX 20200429 6600 C 1A 2.wiff
										Attributes - Input data filenames	Filename of Input File 3	C:\AB SCIEX\ProteinPilot Data\Results\Albert\ZX 20200429 6600\ZX 20200429 6600 C 1A 3.wiff
										Attributes - Input data filenames	Filename of Input File 4	C:\AB SCIEX\ProteinPilot Data\Results\Albert\ZX 20200429 6600\ZX 20200429 6600 C 1A 4.wiff
										Attributes - Input data filenames	Filename of Input File 5	C:\AB SCIEX\ProteinPilot Data\Results\Albert\ZX 20200429 6600\ZX 20200429 6600 C 1A 5.wiff
										Attributes - Input data filenames	Filename of Input File 6	C:\AB SCIEX\ProteinPilot Data\Results\Albert\ZX 20200429 6600\ZX 20200429 6600 C 1A 6.wiff
										Attributes - Input data filenames	Filename of Input File 7	C:\AB SCIEX\ProteinPilot Data\Results\Albert\ZX 20200429 6600\ZX 20200429 6600 C 1A 7.wiff
										Attributes - Input data filenames	Filename of Input File 8	C:\AB SCIEX\ProteinPilot Data\Results\Albert\ZX 20200429 6600\ZX 20200429 6600 C 1A 8.wiff
										Attributes - Input data filenames	Filename of Input File 9	C:\AB SCIEX\ProteinPilot Data\Results\Albert\ZX 20200429 6600\ZX 20200429 6600 C 1A 9.wiff
										Attributes - Input data filenames	Filename of Input File 10	C:\AB SCIEX\ProteinPilot Data\Results\Albert\ZX 20200429 6600\ZX 20200429 6600 C 1A 10.wiff
										Attributes - Input data filenames	Filename of Input File 11	C:\AB SCIEX\ProteinPilot Data\Results\Albert\ZX 20200429 6600\ZX 20200429 6600 C 1A 11.wiff
										Attributes - Input data filenames	Filename of Input File 12	C:\AB SCIEX\ProteinPilot Data\Results\Albert\ZX 20200429 6600\ZX 20200429 6600 C 1A 12.wiff
										Attributes - Input data filenames	Filename of Input File 13	C:\AB SCIEX\ProteinPilot Data\Results\Albert\ZX 20200429 6600\ZX 20200429 6600 C 1A 13.wiff
										Attributes - Input data filenames	Filename of Input File 14
										Attributes - Input data filenames	Filename of Input File 15
										Attributes - Input data filenames	Filename of Input File 16
										Attributes - Input data filenames	Filename of Input File 17
										Attributes - Input data filenames	Filename of Input File 18
										Attributes - Input data filenames	Filename of Input File 19
										Attributes - Input data filenames	Filename of Input File 20
										Attributes - Input data filenames	Filename of Input File 21
										Attributes - Input data filenames	Filename of Input File 22
										Attributes - Input data filenames	Filename of Input File 23
										Attributes - Input data filenames	Filename of Input File 24
										Attributes - Input data filenames	Filename of Input File 25
										Attributes - Input data filenames	Filename of Input File 26
										Attributes - Input data filenames	Filename of Input File 27
										Attributes - Input data filenames	Filename of Input File 28
										Attributes - Input data filenames	Filename of Input File 29
										Attributes - Input data filenames	Filename of Input File 30
										Attributes - Input data filenames	Filename of Input File 31
										Attributes - Input data filenames	Filename of Input File 32
										Attributes - Input data filenames	Filename of Input File 33
										Attributes - Input data filenames	Filename of Input File 34
										Attributes - Input data filenames	Filename of Input File 35
										Attributes - Input data filenames	Filename of Input File 36
										Attributes - Input data filenames	Filename of Input File 37
										Attributes - Input data filenames	Filename of Input File 38
										Attributes - Input data filenames	Filename of Input File 39
										Attributes - Input data filenames	Filename of Input File 40
										Attributes - Input data filenames	Filename of Input File 41
										Attributes - Input data filenames	Filename of Input File 42
										Attributes - Input data filenames	Filename of Input File 43
										Attributes - Input data filenames	Filename of Input File 44
										Attributes - Input data filenames	Filename of Input File 45
										Attributes - Input data filenames	Filename of Input File 46
										Attributes - Input data filenames	Filename of Input File 47
										Attributes - Input data filenames	Filename of Input File 48
										Attributes - Input data filenames	Filename of Input File 49
										Attributes - Input data filenames	Filename of Input File 50
										Attributes - Input data filenames	Filename of Input File 51
										Attributes - Input data filenames	Filename of Input File 52
										Attributes - Input data filenames	Filename of Input File 53
										Attributes - Input data filenames	Filename of Input File 54
										Attributes - Input data filenames	Filename of Input File 55
										Attributes - Input data filenames	Filename of Input File 56
										Attributes - Input data filenames	Filename of Input File 57
										Attributes - Input data filenames	Filename of Input File 58
										Attributes - Input data filenames	Filename of Input File 59
										Attributes - Input data filenames	Filename of Input File 60
										Attributes - Input data filenames	Filename of Input File 61
										Attributes - Input data filenames	Filename of Input File 62
										Attributes - Input data filenames	Filename of Input File 63
										Attributes - Input data filenames	Filename of Input File 64
										Attributes - Input data filenames	Filename of Input File 65
										Attributes - Input data filenames	Filename of Input File 66
										Attributes - Input data filenames	Filename of Input File 67
										Attributes - Input data filenames	Filename of Input File 68
										Attributes - Input data filenames	Filename of Input File 69
										Attributes - Input data filenames	Filename of Input File 70
										Attributes - Input data filenames	Filename of Input File 71
										Attributes - Input data filenames	Filename of Input File 72
										Attributes - Input data filenames	Filename of Input File 73
										Attributes - Input data filenames	Filename of Input File 74
										Attributes - Input data filenames	Filename of Input File 75
										Attributes - Input data filenames	Filename of Input File 76
										Attributes - Input data filenames	Filename of Input File 77
										Attributes - Input data filenames	Filename of Input File 78
										Attributes - Input data filenames	Filename of Input File 79
										Attributes - Input data filenames	Filename of Input File 80
										Attributes - Input data filenames	Filename of Input File 81
										Attributes - Input data filenames	Filename of Input File 82
										Attributes - Input data filenames	Filename of Input File 83
										Attributes - Input data filenames	Filename of Input File 84
										Attributes - Input data filenames	Filename of Input File 85
										Attributes - Input data filenames	Filename of Input File 86
										Attributes - Input data filenames	Filename of Input File 87
										Attributes - Input data filenames	Filename of Input File 88
										Attributes - Input data filenames	Filename of Input File 89
										Attributes - Input data filenames	Filename of Input File 90
										Attributes - Input data filenames	Filename of Input File 91
										Attributes - Input data filenames	Filename of Input File 92
										Attributes - Input data filenames	Filename of Input File 93
										Attributes - Input data filenames	Filename of Input File 94
										Attributes - Input data filenames	Filename of Input File 95
										Attributes - Input data filenames	Filename of Input File 96
										Attributes - Input data filenames	Filename of Input File 97
										Attributes - Input data filenames	Filename of Input File 98
										Attributes - Input data filenames	Filename of Input File 99
										Attributes - Input data filenames	Filename of Input File 100
										Attributes - Input data filenames	Filename of Input File 101
										Attributes - Input data filenames	Filename of Input File 102
										Attributes - Input data filenames	Filename of Input File 103
										Attributes - Input data filenames	Filename of Input File 104
										Attributes - Input data filenames	Filename of Input File 105
										Attributes - Input data filenames	Filename of Input File 106
										Attributes - Input data filenames	Filename of Input File 107
										Attributes - Input data filenames	Filename of Input File 108
										Attributes - Input data filenames	Filename of Input File 109
										Attributes - Input data filenames	Filename of Input File 110
										Attributes - Input data filenames	Filename of Input File 111
										Attributes - Input data filenames	Filename of Input File 112
										Attributes - Input data filenames	Filename of Input File 113
										Attributes - Input data filenames	Filename of Input File 114
										Attributes - Input data filenames	Filename of Input File 115
										Attributes - Input data filenames	Filename of Input File 116
										Attributes - Input data filenames	Filename of Input File 117
										Attributes - Input data filenames	Filename of Input File 118
										Attributes - Input data filenames	Filename of Input File 119
										Attributes - Input data filenames	Filename of Input File 120
										Attributes - Input data filenames	Filename of Input File 121
										Attributes - Input data filenames	Filename of Input File 122
										Attributes - Input data filenames	Filename of Input File 123
										Attributes - Input data filenames	Filename of Input File 124
										Attributes - Input data filenames	Filename of Input File 125
										Attributes - Input data filenames	Filename of Input File 126
										Attributes - Input data filenames	Filename of Input File 127
										Attributes - Input data filenames	Filename of Input File 128
										Attributes - Input data filenames	Filename of Input File 129
										Attributes - Input data filenames	Filename of Input File 130
										Attributes - Input data filenames	Filename of Input File 131
										Attributes - Input data filenames	Filename of Input File 132
										Attributes - Input data filenames	Filename of Input File 133
										Attributes - Input data filenames	Filename of Input File 134
										Attributes - Input data filenames	Filename of Input File 135
										Attributes - Input data filenames	Filename of Input File 136
										Attributes - Input data filenames	Filename of Input File 137
										Attributes - Input data filenames	Filename of Input File 138
										Attributes - Input data filenames	Filename of Input File 139
										Attributes - Input data filenames	Filename of Input File 140
										Attributes - Input data filenames	Filename of Input File 141
										Attributes - Input data filenames	Filename of Input File 142
										Attributes - Input data filenames	Filename of Input File 143
										Attributes - Input data filenames	Filename of Input File 144
										Attributes - Input data filenames	Filename of Input File 145
										Attributes - Input data filenames	Filename of Input File 146
										Attributes - Input data filenames	Filename of Input File 147
										Attributes - Input data filenames	Filename of Input File 148
										Attributes - Input data filenames	Filename of Input File 149
										Attributes - Input data filenames	Filename of Input File 150
										Attributes - Input data filenames	Filename of Input File 151
										Attributes - Input data filenames	Filename of Input File 152
										Attributes - Input data filenames	Filename of Input File 153
										Attributes - Input data filenames	Filename of Input File 154
										Attributes - Input data filenames	Filename of Input File 155
										Attributes - Input data filenames	Filename of Input File 156
										Attributes - Input data filenames	Filename of Input File 157
										Attributes - Input data filenames	Filename of Input File 158
										Attributes - Input data filenames	Filename of Input File 159
										Attributes - Input data filenames	Filename of Input File 160
										Attributes - Input data filenames	Filename of Input File 161
										Attributes - Input data filenames	Filename of Input File 162
										Attributes - Input data filenames	Filename of Input File 163
										Attributes - Input data filenames	Filename of Input File 164
										Attributes - Input data filenames	Filename of Input File 165
										Attributes - Input data filenames	Filename of Input File 166
										Attributes - Input data filenames	Filename of Input File 167
										Attributes - Input data filenames	Filename of Input File 168
										Attributes - Input data filenames	Filename of Input File 169
										Attributes - Input data filenames	Filename of Input File 170
										Attributes - Input data filenames	Filename of Input File 171
										Attributes - Input data filenames	Filename of Input File 172
										Attributes - Input data filenames	Filename of Input File 173
										Attributes - Input data filenames	Filename of Input File 174
										Attributes - Input data filenames	Filename of Input File 175
										Attributes - Input data filenames	Filename of Input File 176
										Attributes - Input data filenames	Filename of Input File 177
										Attributes - Input data filenames	Filename of Input File 178
										Attributes - Input data filenames	Filename of Input File 179
										Attributes - Input data filenames	Filename of Input File 180
										Attributes - Input data filenames	Filename of Input File 181
										Attributes - Input data filenames	Filename of Input File 182
										Attributes - Input data filenames	Filename of Input File 183
										Attributes - Input data filenames	Filename of Input File 184
										Attributes - Input data filenames	Filename of Input File 185
										Attributes - Input data filenames	Filename of Input File 186
										Attributes - Input data filenames	Filename of Input File 187
										Attributes - Input data filenames	Filename of Input File 188
										Attributes - Input data filenames	Filename of Input File 189
										Attributes - Input data filenames	Filename of Input File 190
										Attributes - Input data filenames	Filename of Input File 191
										Attributes - Input data filenames	Filename of Input File 192
										Attributes - Input data filenames	Filename of Input File 193
										Attributes - Input data filenames	Filename of Input File 194
										Attributes - Input data filenames	Filename of Input File 195
										Attributes - Input data filenames	Filename of Input File 196
										Attributes - Input data filenames	Filename of Input File 197
										Attributes - Input data filenames	Filename of Input File 198
										Attributes - Input data filenames	Filename of Input File 199
										Attributes - Input data filenames	Filename of Input File 200

## Sheet: Protein Level Data
Protein Level Data	Unused ProtScore Threshold	Confidence Threshold	Forward	Reverse	Correct	Incorrect	Total	Global FDR	q-value	Fit Unused ProtScore Threshold	Fit Confidence Threshold	Fit Forward	Fit Reverse	Fit Correct	Fit Incorrect	Fit Total	Fit Global FDR	Fit Local FDR
	156.94	1	1	0	1	0	1	0	0	156.94	1	0.99986	0.000139987	0.99972	0.000279973	1	0.000279973	0.00028029
	127.02	1	2	0	2	0	2	0	0	127.02	1	1.99972	0.000280248	1.99944	0.000560497	2	0.000280248	0.000280522
	116.3	1	3	0	3	0	3	0	0	116.3	1	2.99958	0.000420756	2.99916	0.000841511	3	0.000280504	0.000281013
	111.07	1	4	0	4	0	4	0	0	111.07	1	3.99944	0.00056153	3.99888	0.00112306	4	0.000280765	0.000281547
	77.27	1	5	0	5	0	5	0	0	77.27	1	4.9993	0.000702597	4.99859	0.00140519	5	0.000281039	0.000282131
	73.25	1	6	0	6	0	6	0	0	73.25	1	5.99916	0.000843982	5.99831	0.00168796	6	0.000281327	0.000282769
	63.04	1	7	0	7	0	7	0	0	63.04	1	6.99901	0.000985718	6.99803	0.00197144	7	0.000281634	0.000283468
	53.84	1	8	0	8	0	8	0	0	53.84	1	7.99887	0.00112784	7.99774	0.00225567	8	0.000281959	0.000284235
	38.57	1	9	0	9	0	9	0	0	38.57	1	8.99873	0.00127038	8.99746	0.00254076	9	0.000282306	0.000285079
	36.75	1	10	0	10	0	10	0	0	36.75	1	9.99859	0.00141338	9.99717	0.00282677	10	0.000282677	0.000286008
	34.67	1	11	0	11	0	11	0	0	34.67	1	10.9984	0.0015569	10.9969	0.00311381	11	0.000283073	0.000287033
	27.66	1	12	0	12	0	12	0	0	27.66	1	11.9983	0.00170099	11.9966	0.00340198	12	0.000283498	0.000288165
	24.56	1	13	0	13	0	13	0	0	24.56	1	12.9982	0.0018457	12.9963	0.0036914	13	0.000283954	0.000289416
	21.52	1	14	0	14	0	14	0	0	21.52	1	13.998	0.0019911	13.996	0.0039822	14	0.000284443	0.0002908
	19.08	1	15	0	15	0	15	0	0	19.08	1	14.9979	0.00213727	14.9957	0.00427454	15	0.00028497	0.000292334
	18.95	1	16	0	16	0	16	0	0	18.95	1	15.9977	0.00228429	15.9954	0.00456859	16	0.000285537	0.000294034
	18.05	1	17	0	17	0	17	0	0	18.05	1	16.9976	0.00243226	16.9951	0.00486452	17	0.000286148	0.000295921
	16.64	1	18	0	18	0	18	0	0	16.64	1	17.9974	0.00258127	17.9948	0.00516254	18	0.000286808	0.000298017
	16.43	1	19	0	19	0	19	0	0	16.43	1	18.9973	0.00273145	18.9945	0.0054629	19	0.000287521	0.000300345
	15.9	1	20	0	20	0	20	0	0	15.9	1	19.9971	0.00288292	19.9942	0.00576584	20	0.000288292	0.000302934
	14.92	1	21	0	21	0	21	0	0	14.92	1	20.997	0.00303584	20.9939	0.00607167	21	0.000289127	0.000305815
	14.84	1	22	0	22	0	22	0	0	14.84	1	21.9968	0.00319035	21.9936	0.00638071	22	0.000290032	0.000309021
	14.24	1	23	0	23	0	23	0	0	14.24	1	22.9967	0.00334666	22.9933	0.00669332	23	0.000291014	0.000312592
	13.97	1	24	0	24	0	24	0	0	13.97	1	23.9965	0.00350495	23.993	0.00700991	24	0.000292079	0.00031657
	13.35	1	25	0	25	0	25	0	0	13.35	1	24.9963	0.00366547	24.9927	0.00733093	25	0.000293237	0.000321003
	12.79	1	26	0	26	0	26	0	0	12.79	1	25.9962	0.00382845	25.9923	0.0076569	26	0.000294496	0.000325945
	12.45	1	27	0	27	0	27	0	0	12.45	1	26.996	0.00399419	26.992	0.00798838	27	0.000295866	0.000331457
	11.47	1	28	0	28	0	28	0	0	11.47	1	27.9958	0.00416301	27.9917	0.00832602	28	0.000297358	0.000337604
	10.27	1	29	0	29	0	29	0	0	10.27	1	28.9957	0.00433526	28.9913	0.00867051	29	0.000298983	0.000344463
	10.12	1	30	0	30	0	30	0	0	10.12	1	29.9955	0.00451133	29.991	0.00902267	30	0.000300756	0.000352117
	10.07	1	31	0	31	0	31	0	0	10.07	1	30.9953	0.00469168	30.9906	0.00938337	31	0.000302689	0.00036066
	9.85	1	32	0	32	0	32	0	0	9.85	1	31.9951	0.00487681	31.9902	0.00975361	32	0.0003048	0.000370198
	9.05	1	33	0	33	0	33	0	0	9.05	1	32.9949	0.00506726	32.9899	0.0101345	33	0.000307106	0.000380846
	8.94	1	34	0	34	0	34	0	0	8.94	1	33.9947	0.00526365	33.9895	0.0105273	34	0.000309627	0.000392737
	8	1	35	0	35	0	35	0	0	8	1	34.9945	0.00546669	34.9891	0.0109334	35	0.000312383	0.000406018
	7.8	1	36	0	36	0	36	0	0	7.8	1	35.9943	0.00567716	35.9886	0.0113543	36	0.000315398	0.000420851
	7.75	1	37	0	37	0	37	0	0	7.75	1	36.9941	0.00589591	36.9882	0.0117918	37	0.000318698	0.00043742
	7.62	1	38	0	38	0	38	0	0	7.62	1	37.9939	0.00612392	37.9878	0.0122478	38	0.000322311	0.000455931
	6.89	1	39	0	39	0	39	0	0	6.89	1	38.9936	0.00636227	38.9873	0.0127245	39	0.00032627	0.000476611
	6.71	1	40	0	40	0	40	0	0	6.71	1	39.9934	0.00661219	39.9868	0.0132244	40	0.000330609	0.000499717
	6.44	1	41	0	41	0	41	0	0	6.44	1	40.9931	0.00687502	40.9862	0.01375	41	0.000335367	0.000525536
	6.02	0.999999	42	0	42	0	42	0	0	6.02	0.999999	41.9928	0.00715228	41.9857	0.0143046	42	0.000340585	0.000554386
	6.01	0.999999	43	0	43	0	43	0	0	6.01	0.999999	42.9926	0.00744567	42.9851	0.0148913	43	0.00034631	0.000586626
	6	0.999999	45	0	45	0	45	0	0	6	0.999999	43.9922	0.00775709	43.9845	0.0155142	44	0.000352595	0.000642228
	5.8	0.999998	46	0	46	0	46	0	0	6	0.999999	44.9919	0.00808865	44.9838	0.0161773	45	0.000359495	0.000642228
	5.68	0.999998	47	0	47	0	47	0	0	5.8	0.999998	45.9916	0.00844272	45.9831	0.0168854	46	0.000367075	0.000707919
	5.64	0.999998	48	0	48	0	48	0	0	5.68	0.999998	46.9912	0.00882195	46.9824	0.0176439	47	0.000375402	0.000758212
	5.63	0.999998	49	0	49	0	49	0	0	5.64	0.999998	47.9908	0.0092293	47.9815	0.0184586	48	0.000384554	0.000814421
	5.57	0.999997	50	0	50	0	50	0	0	5.63	0.999998	48.9903	0.00966807	48.9807	0.0193361	49	0.000394615	0.000877244
	5.37	0.999996	51	0	51	0	51	0	0	5.57	0.999997	49.9899	0.010142	49.9797	0.0202839	50	0.000405679	0.00094746
	5.23	0.999994	52	0	52	0	52	0	0	5.37	0.999996	50.9893	0.0106551	50.9787	0.0213103	51	0.000417848	0.00102594
	5.11	0.999992	53	0	53	0	53	0	0	5.23	0.999994	51.9888	0.0112122	51.9776	0.0224243	52	0.000431237	0.00111365
	5.01	0.99999	54	0	54	0	54	0	0	5.11	0.999992	52.9882	0.0118183	52.9764	0.0236365	53	0.000445972	0.00121169
	4.6	0.999975	55	0	55	0	55	0	0	5.01	0.99999	53.9875	0.0124792	53.975	0.0249583	54	0.000462191	0.00132126
	4.12	0.999924	56	0	56	0	56	0	0	4.6	0.999975	54.9868	0.0132013	54.9736	0.0264026	55	0.000480048	0.00144372
	4.09	0.999919	58	0	58	0	58	0	0	4.12	0.999924	55.986	0.0139919	55.972	0.0279839	56	0.000499712	0.00158059
	4.02	0.999905	59	0	59	0	59	0	0	4.09	0.999919	56.9851	0.0148591	56.9703	0.0297182	57	0.000521372	0.00181667
	4.01	0.999902	60	0	60	0	60	0	0	4.09	0.999919	57.9842	0.0158118	57.9684	0.0316236	58	0.000545234	0.00181667
	4	0.9999	61	0	61	0	61	0	0	4.02	0.999905	58.9831	0.01686	58.9663	0.0337201	59	0.000571527	0.00209558
	3.79	0.999838	62	0	62	0	62	0	0	4.01	0.999902	59.982	0.0180151	59.964	0.0360302	60	0.000600504	0.00230909
	3.36	0.999563	63	0	63	0	63	0	0	4	0.9999	60.9807	0.0192895	60.9614	0.0385791	61	0.000632444	0.00254768
	3.24	0.999425	64	0	64	0	64	0	0	3.79	0.999838	61.9793	0.0206973	61.9586	0.0413946	62	0.000667656	0.00281429
	3.23	0.999411	65	0	65	0	65	0	0	3.36	0.999563	62.9777	0.0222541	62.9555	0.0445083	63	0.000706481	0.00311219
	2.96	0.998904	66	0	66	0	66	0	0	3.24	0.999425	63.976	0.0239775	63.952	0.0479549	64	0.000749296	0.00344503
	2.51	0.99691	67	0	67	0	67	0	0	3.23	0.999411	64.9741	0.0258868	64.9482	0.0517736	65	0.000796518	0.00381689
	2.44	0.996369	68	0	68	0	68	0	0	2.96	0.998904	65.972	0.028004	65.944	0.056008	66	0.000848606	0.0042323
	2.41	0.99611	69	0	69	0	69	0	0	2.51	0.99691	66.9696	0.0303533	66.9393	0.0607066	67	0.000906068	0.00469633
	2.19	0.993543	70	0	70	0	70	0	0	2.44	0.996369	67.967	0.0329618	67.9341	0.0659237	68	0.000969466	0.00521462
	2.11	0.992238	71	0	71	0	71	0	0	2.41	0.99611	68.9641	0.03586	68.9283	0.0717199	69	0.00103942	0.00579343
	2.08	0.991682	72	0	72	0	72	0	0	2.19	0.993543	69.9609	0.0390814	69.9218	0.0781628	70	0.00111661	0.00643977
	2.07	0.991489	73	0	73	0	73	0	0	2.11	0.992238	70.9573	0.0426639	70.9147	0.0853278	71	0.0012018	0.00716141
	2.05	0.991087	74	0	74	0	74	0	0	2.08	0.991682	71.9534	0.0466493	71.9067	0.0932986	72	0.00129581	0.00796698
	2.02	0.99045	77	0	77	0	77	0	0	2.07	0.991489	72.9489	0.0510845	72.8978	0.102169	73	0.00139958	0.0088661
	2.01	0.990228	79	0	79	0	79	0	0	2.05	0.991087	73.944	0.0560217	73.888	0.112043	74	0.0015141	0.00986943
	2	0.99	88	2	86	4	90	0.0444444	0.0344828	2.02	0.99045	74.9385	0.0615187	74.877	0.123037	75	0.0016405	0.0122373
	1.71	0.980502	89	2	87	4	91	0.043956	0.0344828	2.02	0.99045	75.9324	0.0676404	75.8647	0.135281	76	0.00178001	0.0122373
	1.7	0.980047	90	2	88	4	92	0.0434783	0.0344828	2.02	0.99045	76.9255	0.0744584	76.8511	0.148917	77	0.00193399	0.0122373
	1.64	0.977091	91	2	89	4	93	0.0430108	0.0344828	2.01	0.990228	77.9179	0.0820528	77.8359	0.164106	78	0.00210392	0.0160226
	1.62	0.976012	92	2	90	4	94	0.0425532	0.0344828	2.01	0.990228	78.9095	0.0905122	78.819	0.181024	79	0.00229145	0.0160226
	1.55	0.971816	93	2	91	4	95	0.0421053	0.0344828	2	0.99	79.9001	0.0999353	79.8001	0.199871	80	0.00249838	0.0322542
	1.53	0.970488	94	2	92	4	96	0.0416667	0.0344828	2	0.99	80.8896	0.110431	80.7791	0.220862	81	0.0027267	0.0322542
	1.39	0.959262	95	2	93	4	97	0.0412371	0.0344828	2	0.99	81.8779	0.122121	81.7558	0.244242	82	0.00297856	0.0322542
	1.31	0.951022	96	2	94	4	98	0.0408163	0.0344828	2	0.99	82.8649	0.135139	82.7297	0.270278	83	0.00325637	0.0322542
	1.28	0.947519	97	2	95	4	99	0.040404	0.0344828	2	0.99	83.8504	0.149634	83.7007	0.299267	84	0.00356271	0.0322542
	1.21	0.938341	98	2	96	4	100	0.04	0.0344828	2	0.99	84.8342	0.165768	84.6685	0.331537	85	0.00390043	0.0322542
	1.19	0.935435	99	2	97	4	101	0.039604	0.0344828	2	0.99	85.8163	0.183724	85.6326	0.367447	86	0.00427264	0.0322542
	1.1	0.920567	100	2	98	4	102	0.0392157	0.0344828	2	0.99	86.7963	0.203699	86.5926	0.407397	87	0.00468273	0.0322542
	1.09	0.918717	101	2	99	4	103	0.038835	0.0344828	2	0.99	87.7741	0.225912	87.5482	0.451823	88	0.00513436	0.0322542
	1.06	0.912904	102	2	100	4	104	0.0384615	0.0344828	2	0.99	88.7494	0.250603	88.4988	0.501205	89	0.00563152	0.0322542
	0.98	0.895287	103	2	101	4	105	0.0380952	0.0344828	2	0.99	89.722	0.278034	89.4439	0.556067	90	0.00617853	0.0322542
	0.83	0.852089	104	2	102	4	106	0.0377358	0.0344828	1.71	0.980502	90.6915	0.308491	90.383	0.616983	91	0.00678003	0.0608894
	0.8	0.841511	106	2	104	4	108	0.037037	0.0344828	1.7	0.980047	91.6577	0.342288	91.3154	0.684575	92	0.00744103	0.0675642
	0.7	0.800474	107	2	105	4	109	0.0366972	0.0344828	1.64	0.977091	92.6202	0.379761	92.2405	0.759522	93	0.0081669	0.074916
	0.62	0.760117	108	2	106	4	110	0.0363636	0.0344828	1.62	0.976012	93.5787	0.421277	93.1574	0.842555	94	0.00896335	0.0830003
	0.6	0.748811	109	2	107	4	111	0.036036	0.0344828	1.55	0.971816	94.5328	0.467232	94.0655	0.934464	95	0.00983646	0.091874
	0.47	0.661156	110	2	108	4	112	0.0357143	0.0344828	1.53	0.970488	95.482	0.518049	94.9639	1.0361	96	0.0107927	0.101595
	0.39	0.59262	111	2	109	4	113	0.0353982	0.0344828	1.39	0.959262	96.4258	0.574179	95.8516	1.14836	97	0.0118387	0.112221
	0.35	0.553316	112	2	110	4	114	0.0350877	0.0344828	1.31	0.951022	97.3639	0.636105	96.7278	1.27221	98	0.0129817	0.12381
	0.33	0.532265	113	2	111	4	115	0.0347826	0.0344828	1.28	0.947519	98.2957	0.704335	97.5913	1.40867	99	0.014229	0.136415
	0.28	0.475193	114	2	112	4	116	0.0344828	0.0344828	1.21	0.938341	99.2206	0.779403	98.4412	1.55881	100	0.0155881	0.150088
	0.27	0.462968	114	3	111	6	117	0.0512821	0.0504202	1.19	0.935435	100.138	0.861863	99.2763	1.72373	101	0.0170666	0.164874
	0.24	0.42456	116	3	113	6	119	0.0504202	0.0504202	1.1	0.920567	101.048	0.952293	100.095	1.90459	102	0.0186724	0.180811
	0.23	0.411156	117	4	113	8	121	0.0661157	0.0661157	1.09	0.918717	101.949	1.05128	100.897	2.10256	103	0.0204132	0.197927
	0.22	0.39744	117	5	112	10	122	0.0819672	0.0819672	1.06	0.912904	102.841	1.15943	101.681	2.31886	104	0.0222967	0.216242
	0.21	0.383405	118	6	112	12	124	0.0967742	0.096	0.98	0.895287	103.723	1.27733	102.445	2.55466	105	0.0243301	0.235758
	0.18	0.339307	119	6	113	12	125	0.096	0.096	0.83	0.852089	104.594	1.40559	103.189	2.81118	106	0.0265205	0.256465
	0.17	0.323917	119	8	111	16	127	0.125984	0.125984	0.8	0.841511	105.455	1.54478	103.91	3.08956	107	0.0288744	0.28969
	0.15	0.292054	119	9	110	18	128	0.140625	0.140625	0.8	0.841511	106.305	1.69546	104.609	3.39092	108	0.0313974	0.28969
	0.14	0.275564	119	10	109	20	129	0.155039	0.155039	0.7	0.800474	107.142	1.85816	105.284	3.71631	109	0.0340946	0.325353
	0.13	0.25869	120	12	108	24	132	0.181818	0.181818	0.62	0.760117	107.967	2.03335	105.933	4.0667	110	0.03697	0.350351
	0.12	0.241422	120	13	107	26	133	0.195489	0.195489	0.6	0.748811	108.779	2.22147	106.557	4.44294	111	0.0400265	0.376208
	0.1	0.205672	120	14	106	28	134	0.208955	0.206897	0.47	0.661156	109.577	2.42288	107.154	4.84576	112	0.0432657	0.4028
	0.09	0.187169	123	15	108	30	138	0.217391	0.206897	0.39	0.59262	110.362	2.63788	107.724	5.27577	113	0.0466882	0.429986
	0.08	0.168236	126	15	111	30	141	0.212766	0.206897	0.35	0.553316	111.133	2.8667	108.267	5.73339	114	0.0502929	0.457614
	0.07	0.148862	128	15	113	30	143	0.20979	0.206897	0.33	0.532265	111.891	3.10946	108.781	6.21891	115	0.0540775	0.485517
	0.06	0.129036	130	15	115	30	145	0.206897	0.206897	0.28	0.475193	112.634	3.36622	109.268	6.73244	116	0.0580382	0.513526
	0.05	0.108749	135	18	117	36	153	0.235294	0.235294	0.27	0.462968	113.363	3.63695	109.726	7.27389	117	0.06217	0.541466
										0.24	0.42456	114.078	3.92152	110.157	7.84304	118	0.0664665	0.582873
										0.24	0.42456	114.78	4.21974	110.561	8.43948	119	0.07092	0.582873
										0.23	0.411156	115.469	4.53132	110.937	9.06263	120	0.0755219	0.636294
										0.23	0.411156	116.144	4.8559	111.288	9.71181	121	0.0802629	0.636294
										0.22	0.39744	116.807	5.19308	111.614	10.3862	122	0.0851325	0.674396
										0.21	0.383405	117.458	5.54238	111.915	11.0848	123	0.09012	0.71038
										0.21	0.383405	118.097	5.90328	112.193	11.8066	124	0.0952142	0.71038
										0.18	0.339307	118.725	6.27524	112.45	12.5505	125	0.100404	0.743959
										0.17	0.323917	119.342	6.65767	112.685	13.3153	126	0.105677	0.774945
										0.17	0.323917	119.95	7.04998	112.9	14.1	127	0.111023	0.774945
										0.15	0.292054	120.548	7.45158	113.097	14.9032	128	0.116431	0.803246
										0.14	0.275564	121.138	7.86186	113.276	15.7237	129	0.121889	0.820612
										0.13	0.25869	121.72	8.28024	113.44	16.5605	130	0.127388	0.851819
										0.13	0.25869	122.294	8.70612	113.588	17.4122	131	0.132918	0.851819
										0.13	0.25869	122.861	9.13896	113.722	18.2779	132	0.138469	0.851819
										0.12	0.241422	123.422	9.57821	113.844	19.1564	133	0.144033	0.878546
										0.1	0.205672	123.977	10.0234	113.953	20.0467	134	0.149602	0.890344
										0.09	0.187169	124.526	10.4739	114.052	20.9479	135	0.155169	0.9157
										0.09	0.187169	125.071	10.9294	114.141	21.8589	136	0.160727	0.9157
										0.09	0.187169	125.611	11.3895	114.221	22.779	137	0.16627	0.9157
										0.09	0.187169	126.146	11.8537	114.293	23.7073	138	0.171792	0.9157
										0.08	0.168236	126.678	12.3216	114.357	24.6431	139	0.177289	0.942677
										0.08	0.168236	127.207	12.7929	114.414	25.5858	140	0.182756	0.942677
										0.08	0.168236	127.733	13.2673	114.465	26.5346	141	0.188189	0.942677
										0.07	0.148862	128.255	13.7445	114.511	27.4891	142	0.193585	0.957043
										0.07	0.148862	128.776	14.2243	114.551	28.4485	143	0.198941	0.957043
										0.06	0.129036	129.294	14.7063	114.587	29.4126	144	0.204254	0.966196
										0.06	0.129036	129.81	15.1904	114.619	30.3808	145	0.209523	0.966196
										0.05	0.108749	130.324	15.6764	114.647	31.3527	146	0.214745	0.982263
										0.05	0.108749	130.836	16.164	114.672	32.328	147	0.219918	0.982263
										0.05	0.108749	131.347	16.6531	114.694	33.3063	148	0.225042	0.982263
										0.05	0.108749	131.856	17.1436	114.713	34.2873	149	0.230116	0.982263
										0.05	0.108749	132.365	17.6353	114.729	35.2707	150	0.235138	0.982263
										0.05	0.108749	132.872	18.1282	114.744	36.2563	151	0.240108	0.982263
										0.05	0.108749	133.378	18.622	114.756	37.2439	152	0.245026	0.982263
										0.05	0.108749	133.883	19.1167	114.767	38.2333	153	0.249891	0.982263

## Sheet: Distinct Peptide Level Data
Distinct Peptide Level Data		Confidence Threshold	Forward	Reverse	Correct	Incorrect	Total	Global FDR	q-value		Fit Confidence Threshold	Fit Forward	Fit Reverse	Fit Correct	Fit Incorrect	Fit Total	Fit Global FDR	Fit Local FDR
		1	208	2	206	4	210	0.0190476	0.003996		1	0.999216	0.000784078	0.998432	0.00156816	1	0.00156816	0.00158917
		0.9999	332	2	330	4	334	0.011976	0.003996		1	1.99843	0.00156819	1.99686	0.00313638	2	0.00156819	0.00158917
		0.9998	397	2	395	4	399	0.0100251	0.003996		1	2.99765	0.00235233	2.9953	0.00470466	3	0.00156822	0.00158917
		0.9997	446	2	444	4	448	0.00892857	0.003996		1	3.99686	0.0031365	3.99373	0.006273	4	0.00156825	0.00158917
		0.9996	448	2	446	4	450	0.00888889	0.003996		1	4.99608	0.0039207	4.99216	0.00784141	5	0.00156828	0.00158917
		0.9995	454	2	452	4	456	0.00877193	0.003996		1	5.9953	0.00470494	5.99059	0.00940987	6	0.00156831	0.00158917
		0.9994	455	2	453	4	457	0.00875274	0.003996		1	6.99451	0.0054892	6.98902	0.0109784	7	0.00156834	0.00158917
		0.9993	537	2	535	4	539	0.00742115	0.003996		1	7.99373	0.0062735	7.98745	0.012547	8	0.00156837	0.00158917
		0.9992	538	2	536	4	540	0.00740741	0.003996		1	8.99294	0.00705783	8.98588	0.0141157	9	0.00156841	0.00158917
		0.9991	544	2	542	4	546	0.00732601	0.003996		1	9.99216	0.00784218	9.98432	0.0156844	10	0.00156844	0.00158917
		0.999	569	2	567	4	571	0.00700525	0.003996		1	10.9914	0.00862657	10.9827	0.0172531	11	0.00156847	0.00158917
		0.9989	577	2	575	4	579	0.00690846	0.003996		1	11.9906	0.009411	11.9812	0.018822	12	0.0015685	0.00158917
		0.9988	582	2	580	4	584	0.00684932	0.003996		1	12.9898	0.0101954	12.9796	0.0203909	13	0.00156853	0.00158917
		0.9987	585	2	583	4	587	0.00681431	0.003996		1	13.989	0.0109799	13.978	0.0219599	14	0.00156856	0.00158917
		0.9986	588	2	586	4	590	0.00677966	0.003996		1	14.9882	0.0117644	14.9765	0.0235289	15	0.00156859	0.00158917
		0.9985	597	2	595	4	599	0.0066778	0.003996		1	15.9875	0.012549	15.9749	0.025098	16	0.00156862	0.00158917
		0.9984	602	2	600	4	604	0.00662252	0.003996		1	16.9867	0.0133336	16.9733	0.0266671	17	0.00156866	0.00158917
		0.9983	611	2	609	4	613	0.00652529	0.003996		1	17.9859	0.0141182	17.9718	0.0282364	18	0.00156869	0.00158917
		0.9982	612	2	610	4	614	0.00651466	0.003996		1	18.9851	0.0149028	18.9702	0.0298056	19	0.00156872	0.00158917
		0.9981	662	2	660	4	664	0.0060241	0.003996		1	19.9843	0.0156875	19.9686	0.031375	20	0.00156875	0.00158917
		0.998	711	2	709	4	713	0.0056101	0.003996		1	20.9835	0.0164722	20.9671	0.0329444	21	0.00156878	0.00158917
		0.9979	712	2	710	4	714	0.00560224	0.003996		1	21.9827	0.0172569	21.9655	0.0345138	22	0.00156881	0.00158917
		0.9977	725	2	723	4	727	0.00550206	0.003996		1	22.982	0.0180417	22.9639	0.0360834	23	0.00156884	0.00158917
		0.9976	732	2	730	4	734	0.00544959	0.003996		1	23.9812	0.0188265	23.9623	0.037653	24	0.00156887	0.00158917
		0.9975	743	2	741	4	745	0.00536913	0.003996		1	24.9804	0.0196113	24.9608	0.0392226	25	0.0015689	0.00158917
		0.9974	745	2	743	4	747	0.00535475	0.003996		1	25.9796	0.0203962	25.9592	0.0407923	26	0.00156894	0.00158917
		0.9973	748	2	746	4	750	0.00533333	0.003996		1	26.9788	0.0211811	26.9576	0.0423621	27	0.00156897	0.00158917
		0.9972	752	2	750	4	754	0.00530504	0.003996		1	27.978	0.021966	27.9561	0.0439319	28	0.001569	0.00158917
		0.9971	755	2	753	4	757	0.00528402	0.003996		1	28.9772	0.0227509	28.9545	0.0455018	29	0.00156903	0.00158917
		0.997	758	2	756	4	760	0.00526316	0.003996		1	29.9765	0.0235359	29.9529	0.0470718	30	0.00156906	0.00158917
		0.9969	773	2	771	4	775	0.00516129	0.003996		1	30.9757	0.0243209	30.9514	0.0486418	31	0.00156909	0.00158917
		0.9968	780	2	778	4	782	0.00511509	0.003996		1	31.9749	0.025106	31.9498	0.0502119	32	0.00156912	0.00158917
		0.9967	781	2	779	4	783	0.00510856	0.003996		1	32.9741	0.025891	32.9482	0.0517821	33	0.00156915	0.00158917
		0.9966	783	2	781	4	785	0.00509554	0.003996		1	33.9733	0.0266761	33.9466	0.0533523	34	0.00156918	0.00158917
		0.9965	784	2	782	4	786	0.00508906	0.003996		1	34.9725	0.0274613	34.9451	0.0549226	35	0.00156922	0.00158917
		0.9964	788	2	786	4	790	0.00506329	0.003996		1	35.9718	0.0282464	35.9435	0.0564929	36	0.00156925	0.00158917
		0.9963	790	2	788	4	792	0.00505051	0.003996		1	36.971	0.0290316	36.9419	0.0580633	37	0.00156928	0.00158917
		0.9962	791	2	789	4	793	0.00504414	0.003996		1	37.9702	0.0298169	37.9404	0.0596338	38	0.00156931	0.00158917
		0.9961	796	2	794	4	798	0.00501253	0.003996		1	38.9694	0.0306021	38.9388	0.0612043	39	0.00156934	0.00158917
		0.996	800	2	798	4	802	0.00498753	0.003996		1	39.9686	0.0313874	39.9372	0.0627749	40	0.00156937	0.00158917
		0.9959	826	2	824	4	828	0.00483092	0.003996		1	40.9678	0.0321728	40.9357	0.0643455	41	0.0015694	0.00158917
		0.9958	827	2	825	4	829	0.00482509	0.003996		1	41.967	0.0329581	41.9341	0.0659162	42	0.00156943	0.00158917
		0.9957	830	2	828	4	832	0.00480769	0.003996		1	42.9663	0.0337435	42.9325	0.067487	43	0.00156947	0.00158917
		0.9956	833	2	831	4	835	0.00479042	0.003996		1	43.9655	0.0345289	43.9309	0.0690579	44	0.0015695	0.00158917
		0.9955	858	2	856	4	860	0.00465116	0.003996		1	44.9647	0.0353144	44.9294	0.0706288	45	0.00156953	0.00158917
		0.9954	860	2	858	4	862	0.00464037	0.003996		1	45.9639	0.0360999	45.9278	0.0721997	46	0.00156956	0.00158917
		0.9953	863	2	861	4	865	0.00462428	0.003996		1	46.9631	0.0368854	46.9262	0.0737707	47	0.00156959	0.00158917
		0.9952	865	2	863	4	867	0.00461361	0.003996		1	47.9623	0.0376709	47.9247	0.0753418	48	0.00156962	0.00158917
		0.9951	867	2	865	4	869	0.00460299	0.003996		1	48.9615	0.0384565	48.9231	0.076913	49	0.00156965	0.00158917
		0.995	868	2	866	4	870	0.0045977	0.003996		1	49.9608	0.0392421	49.9215	0.0784842	50	0.00156968	0.00158917
		0.9949	912	2	910	4	914	0.00437637	0.003996		1	50.96	0.0400277	50.9199	0.0800555	51	0.00156972	0.00158917
		0.9948	914	2	912	4	916	0.00436681	0.003996		1	51.9592	0.0408134	51.9184	0.0816268	52	0.00156975	0.00158917
		0.9947	920	2	918	4	922	0.00433839	0.003996		1	52.9584	0.0415991	52.9168	0.0831982	53	0.00156978	0.00158917
		0.9946	924	2	922	4	926	0.00431965	0.003996		1	53.9576	0.0423849	53.9152	0.0847697	54	0.00156981	0.00158917
		0.9945	925	2	923	4	927	0.00431499	0.003996		1	54.9568	0.0431706	54.9137	0.0863413	55	0.00156984	0.00158917
		0.9944	926	2	924	4	928	0.00431034	0.003996		1	55.956	0.0439564	55.9121	0.0879129	56	0.00156987	0.00158917
		0.9943	928	2	926	4	930	0.00430108	0.003996		1	56.9553	0.0447423	56.9105	0.0894846	57	0.0015699	0.00158917
		0.9941	929	2	927	4	931	0.00429646	0.003996		1	57.9545	0.0455282	57.9089	0.0910563	58	0.00156994	0.00158917
		0.994	940	2	938	4	942	0.00424628	0.003996		1	58.9537	0.0463141	58.9074	0.0926281	59	0.00156997	0.00158917
		0.9937	946	2	944	4	948	0.00421941	0.003996		1	59.9529	0.0471	59.9058	0.0942	60	0.00157	0.00158917
		0.9935	948	2	946	4	950	0.00421053	0.003996		1	60.9521	0.047886	60.9042	0.095772	61	0.00157003	0.00158917
		0.9933	949	2	947	4	951	0.0042061	0.003996		1	61.9513	0.048672	61.9027	0.0973441	62	0.00157007	0.00158917
		0.9931	951	2	949	4	953	0.00419727	0.003996		1	62.9505	0.0494581	62.9011	0.0989162	63	0.0015701	0.00158917
		0.993	953	2	951	4	955	0.00418848	0.003996		1	63.9498	0.0502442	63.8995	0.100488	64	0.00157013	0.00158917
		0.9929	957	2	955	4	959	0.00417101	0.003996		1	64.949	0.0510304	64.8979	0.102061	65	0.00157017	0.00158917
		0.9928	963	2	961	4	965	0.00414508	0.003996		1	65.9482	0.0518166	65.8964	0.103633	66	0.0015702	0.00158917
		0.9927	970	2	968	4	972	0.00411523	0.003996		1	66.9474	0.0526029	66.8948	0.105206	67	0.00157024	0.00158917
		0.9926	971	2	969	4	973	0.004111	0.003996		1	67.9466	0.0533892	67.8932	0.106778	68	0.00157027	0.00158917
		0.9924	972	2	970	4	974	0.00410678	0.003996		1	68.9458	0.0541756	68.8916	0.108351	69	0.00157031	0.00158917
		0.9923	979	2	977	4	981	0.00407747	0.003996		1	69.945	0.054962	69.8901	0.109924	70	0.00157034	0.00158917
		0.9922	980	2	978	4	982	0.00407332	0.003996		1	70.9443	0.0557485	70.8885	0.111497	71	0.00157038	0.00158917
		0.9921	981	2	979	4	983	0.00406918	0.003996		1	71.9435	0.0565351	71.8869	0.11307	72	0.00157042	0.00158917
		0.9919	994	2	992	4	996	0.00401606	0.003996		1	72.9427	0.0573218	72.8854	0.114644	73	0.00157046	0.00158917
		0.9917	998	2	996	4	1000	0.004	0.003996		1	73.9419	0.0581085	73.8838	0.116217	74	0.0015705	0.00158917
		0.9916	999	2	997	4	1001	0.003996	0.003996		1	74.9411	0.0588953	74.8822	0.117791	75	0.00157054	0.00158917
		0.9914	1001	3	998	6	1004	0.0059761	0.00530504		1	75.9403	0.0596822	75.8806	0.119364	76	0.00157058	0.00158917
		0.9913	1002	3	999	6	1005	0.00597015	0.00530504		1	76.9395	0.0604692	76.8791	0.120938	77	0.00157063	0.00158917
		0.9912	1003	3	1000	6	1006	0.00596421	0.00530504		1	77.9387	0.0612563	77.8775	0.122513	78	0.00157067	0.00158917
		0.9911	1004	3	1001	6	1007	0.00595829	0.00530504		1	78.938	0.0620435	78.8759	0.124087	79	0.00157072	0.00158917
		0.991	1008	3	1005	6	1011	0.00593472	0.00530504		1	79.9372	0.0628309	79.8743	0.125662	80	0.00157077	0.00158917
		0.9909	1010	3	1007	6	1013	0.005923	0.00530504		1	80.9364	0.0636183	80.8728	0.127237	81	0.00157082	0.00158917
		0.9908	1011	3	1008	6	1014	0.00591716	0.00530504		1	81.9356	0.0644059	81.8712	0.128812	82	0.00157088	0.00158917
		0.9907	1012	3	1009	6	1015	0.00591133	0.00530504		1	82.9348	0.0651937	82.8696	0.130387	83	0.00157093	0.00158917
		0.9905	1013	3	1010	6	1016	0.00590551	0.00530504		1	83.934	0.0659816	83.868	0.131963	84	0.00157099	0.00158917
		0.9902	1025	3	1022	6	1028	0.00583658	0.00530504		1	84.9332	0.0667697	84.8665	0.133539	85	0.00157105	0.00158917
		0.9901	1026	3	1023	6	1029	0.0058309	0.00530504		1	85.9324	0.0675579	85.8649	0.135116	86	0.00157111	0.00158917
		0.99	1030	3	1027	6	1033	0.00580833	0.00530504		1	86.9317	0.0683463	86.8633	0.136693	87	0.00157118	0.00158917
		0.9899	1031	3	1028	6	1034	0.00580271	0.00530504		1	87.9309	0.069135	87.8617	0.13827	88	0.00157125	0.00158917
		0.9897	1035	3	1032	6	1038	0.00578035	0.00530504		1	88.9301	0.0699238	88.8602	0.139848	89	0.00157132	0.00158917
		0.9896	1036	3	1033	6	1039	0.00577478	0.00530504		1	89.9293	0.0707129	89.8586	0.141426	90	0.0015714	0.00158917
		0.9895	1037	3	1034	6	1040	0.00576923	0.00530504		1	90.9285	0.0715022	90.857	0.143004	91	0.00157148	0.00158917
		0.9894	1038	3	1035	6	1041	0.00576369	0.00530504		1	91.9277	0.0722918	91.8554	0.144584	92	0.00157156	0.00158917
		0.9892	1040	3	1037	6	1043	0.00575264	0.00530504		1	92.9269	0.0730816	92.8538	0.146163	93	0.00157165	0.00158917
		0.989	1041	3	1038	6	1044	0.00574713	0.00530504		1	93.9261	0.0738717	93.8523	0.147743	94	0.00157174	0.00158917
		0.9889	1052	3	1049	6	1055	0.0056872	0.00530504		1	94.9253	0.0746621	94.8507	0.149324	95	0.00157183	0.00158917
		0.9888	1054	3	1051	6	1057	0.00567644	0.00530504		1	95.9245	0.0754528	95.8491	0.150906	96	0.00157193	0.00158917
		0.9885	1055	3	1052	6	1058	0.00567108	0.00530504		1	96.9238	0.0762439	96.8475	0.152488	97	0.00157204	0.00158917
		0.988	1056	3	1053	6	1059	0.00566572	0.00530504		1	97.923	0.0770353	97.8459	0.154071	98	0.00157215	0.00158917
		0.9877	1057	3	1054	6	1060	0.00566038	0.00530504		1	98.9222	0.077827	98.8443	0.155654	99	0.00157226	0.00158917
		0.9875	1058	3	1055	6	1061	0.00565504	0.00530504		1	99.9214	0.0786192	99.8428	0.157238	100	0.00157238	0.00158917
		0.9874	1059	3	1056	6	1062	0.00564972	0.00530504		1	100.921	0.0794117	100.841	0.158823	101	0.00157251	0.00158917
		0.9873	1063	3	1060	6	1066	0.00562852	0.00530504		1	101.92	0.0802047	101.84	0.160409	102	0.00157264	0.00158917
		0.987	1065	3	1062	6	1068	0.00561798	0.00530504		1	102.919	0.0809981	102.838	0.161996	103	0.00157278	0.00158917
		0.9869	1069	3	1066	6	1072	0.00559701	0.00530504		1	103.918	0.0817919	103.836	0.163584	104	0.00157292	0.00158917
		0.9867	1070	3	1067	6	1073	0.0055918	0.00530504		1	104.917	0.0825863	104.835	0.165173	105	0.00157307	0.00158917
		0.9866	1072	3	1069	6	1075	0.0055814	0.00530504		1	105.917	0.0833811	105.833	0.166762	106	0.00157323	0.00158917
		0.9865	1073	3	1070	6	1076	0.00557621	0.00530504		1	106.916	0.0841765	106.832	0.168353	107	0.00157339	0.00158917
		0.9863	1076	3	1073	6	1079	0.0055607	0.00530504		1	107.915	0.0849724	107.83	0.169945	108	0.00157356	0.00158917
		0.9861	1080	3	1077	6	1083	0.00554017	0.00530504		1	108.914	0.0857688	108.828	0.171538	109	0.00157374	0.00158917
		0.986	1081	3	1078	6	1084	0.00553506	0.00530504		1	109.913	0.0865659	109.827	0.173132	110	0.00157393	0.00158917
		0.9858	1082	3	1079	6	1085	0.00552995	0.00530504		1	110.913	0.0873635	110.825	0.174727	111	0.00157412	0.00158917
		0.9855	1084	3	1081	6	1087	0.00551978	0.00530504		1	111.912	0.0881618	111.824	0.176324	112	0.00157432	0.00158917
		0.9853	1087	3	1084	6	1090	0.00550459	0.00530504		1	112.911	0.0889608	112.822	0.177922	113	0.00157453	0.00158917
		0.9848	1088	3	1085	6	1091	0.00549954	0.00530504		1	113.91	0.0897604	113.82	0.179521	114	0.00157474	0.00158917
		0.9847	1089	3	1086	6	1092	0.00549451	0.00530504		1	114.909	0.0905607	114.819	0.181121	115	0.00157497	0.00158917
		0.9846	1095	3	1092	6	1098	0.00546448	0.00530504		1	115.909	0.0913618	115.817	0.182724	116	0.0015752	0.00158917
		0.9842	1096	3	1093	6	1099	0.00545951	0.00530504		1	116.908	0.0921636	116.816	0.184327	117	0.00157545	0.00158917
		0.9841	1097	3	1094	6	1100	0.00545455	0.00530504		1	117.907	0.0929661	117.814	0.185932	118	0.0015757	0.00158917
		0.984	1098	3	1095	6	1101	0.00544959	0.00530504		1	118.906	0.0937695	118.812	0.187539	119	0.00157596	0.00158917
		0.9835	1100	3	1097	6	1103	0.00543971	0.00530504		1	119.905	0.0945737	119.811	0.189147	120	0.00157623	0.00158917
		0.9834	1101	3	1098	6	1104	0.00543478	0.00530504		1	120.905	0.0953787	120.809	0.190757	121	0.00157651	0.00158917
		0.9831	1103	3	1100	6	1106	0.00542495	0.00530504		1	121.904	0.0961846	121.808	0.192369	122	0.0015768	0.00158917
		0.9828	1104	3	1101	6	1107	0.00542005	0.00530504		1	122.903	0.0969914	122.806	0.193983	123	0.0015771	0.00158917
		0.9827	1110	3	1107	6	1113	0.00539084	0.00530504		1	123.902	0.0977992	123.804	0.195598	124	0.00157741	0.00158917
		0.982	1111	3	1108	6	1114	0.005386	0.00530504		1	124.901	0.0986079	124.803	0.197216	125	0.00157773	0.00158917
		0.9816	1112	3	1109	6	1115	0.00538117	0.00530504		1	125.901	0.0994176	125.801	0.198835	126	0.00157806	0.00158917
		0.9814	1113	3	1110	6	1116	0.00537634	0.00530504		1	126.9	0.100228	126.8	0.200456	127	0.0015784	0.00158917
		0.9812	1114	3	1111	6	1117	0.00537153	0.00530504		1	127.899	0.10104	127.798	0.20208	128	0.00157875	0.00158917
		0.9807	1115	3	1112	6	1118	0.00536673	0.00530504		1	128.898	0.101853	128.796	0.203705	129	0.00157911	0.00158917
		0.9806	1118	3	1115	6	1121	0.00535236	0.00530504		1	129.897	0.102667	129.795	0.205333	130	0.00157949	0.00158917
		0.9805	1119	3	1116	6	1122	0.00534759	0.00530504		1	130.897	0.103481	130.793	0.206963	131	0.00157987	0.00158917
		0.9804	1120	3	1117	6	1123	0.00534283	0.00530504		1	131.896	0.104298	131.791	0.208595	132	0.00158027	0.00158917
		0.9803	1121	3	1118	6	1124	0.00533808	0.00530504		1	132.895	0.105115	132.79	0.21023	133	0.00158067	0.00158917
		0.9802	1122	3	1119	6	1125	0.00533333	0.00530504		1	133.894	0.105933	133.788	0.211867	134	0.00158109	0.00158917
		0.98	1126	3	1123	6	1129	0.00531444	0.00530504		1	134.893	0.106753	134.786	0.213506	135	0.00158153	0.00158917
		0.9798	1128	3	1125	6	1131	0.00530504	0.00530504		1	135.892	0.107574	135.785	0.215148	136	0.00158197	0.00158917
		0.9793	1128	4	1124	8	1132	0.00706714	0.00695652		1	136.892	0.108396	136.783	0.216792	137	0.00158242	0.00158917
		0.9792	1129	4	1125	8	1133	0.0070609	0.00695652		1	137.891	0.10922	137.782	0.218439	138	0.00158289	0.00158917
		0.9789	1133	4	1129	8	1137	0.00703606	0.00695652		1	138.89	0.110044	138.78	0.220089	139	0.00158337	0.00158917
		0.9788	1135	4	1131	8	1139	0.00702371	0.00695652		1	139.889	0.11087	139.778	0.221741	140	0.00158386	0.00158917
		0.9787	1137	4	1133	8	1141	0.00701139	0.00695652		1	140.888	0.111698	140.777	0.223396	141	0.00158437	0.00158917
		0.9786	1138	4	1134	8	1142	0.00700525	0.00695652		1	141.887	0.112527	141.775	0.225054	142	0.00158489	0.00158917
		0.9785	1139	4	1135	8	1143	0.00699913	0.00695652		1	142.887	0.113357	142.773	0.226715	143	0.00158542	0.00158917
		0.9784	1140	4	1136	8	1144	0.00699301	0.00695652		1	143.886	0.114189	143.772	0.228378	144	0.00158596	0.00158917
		0.9781	1141	4	1137	8	1145	0.0069869	0.00695652		1	144.885	0.115022	144.77	0.230045	145	0.00158652	0.00158917
		0.978	1143	4	1139	8	1147	0.00697472	0.00695652		1	145.884	0.115857	145.768	0.231714	146	0.00158708	0.00158917
		0.9772	1144	4	1140	8	1148	0.00696864	0.00695652		1	146.883	0.116694	146.767	0.233387	147	0.00158767	0.00158917
		0.9771	1145	4	1141	8	1149	0.00696258	0.00695652		1	147.882	0.117531	147.765	0.235063	148	0.00158826	0.00158917
		0.9769	1146	4	1142	8	1150	0.00695652	0.00695652		1	148.882	0.118371	148.763	0.236742	149	0.00158887	0.00158917
		0.9768	1147	5	1142	10	1152	0.00868056	0.00833333		1	149.881	0.119212	149.762	0.238424	150	0.00158949	0.00158917
		0.9767	1149	5	1144	10	1154	0.00866551	0.00833333		1	150.88	0.120055	150.76	0.24011	151	0.00159013	0.00158917
		0.9761	1150	5	1145	10	1155	0.00865801	0.00833333		1	151.879	0.120899	151.758	0.241799	152	0.00159078	0.00158917
		0.9758	1152	5	1147	10	1157	0.00864304	0.00833333		1	152.878	0.121745	152.757	0.243491	153	0.00159144	0.00158917
		0.9755	1153	5	1148	10	1158	0.00863558	0.00833333		1	153.877	0.122593	153.755	0.245186	154	0.00159212	0.00158917
		0.9752	1154	5	1149	10	1159	0.00862813	0.00833333		1	154.877	0.123443	154.753	0.246886	155	0.00159281	0.00158917
		0.9751	1155	5	1150	10	1160	0.00862069	0.00833333		1	155.876	0.124294	155.751	0.248588	156	0.00159351	0.00158917
		0.9747	1157	5	1152	10	1162	0.00860585	0.00833333		1	156.875	0.125147	156.75	0.250295	157	0.00159423	0.00158917
		0.9746	1158	5	1153	10	1163	0.00859845	0.00833333		1	157.874	0.126002	157.748	0.252004	158	0.00159497	0.00158917
		0.9744	1159	5	1154	10	1164	0.00859107	0.00833333		1	158.873	0.126859	158.746	0.253718	159	0.00159571	0.00158917
		0.9741	1162	5	1157	10	1167	0.00856898	0.00833333		1	159.872	0.127718	159.745	0.255435	160	0.00159647	0.00158917
		0.9737	1163	5	1158	10	1168	0.00856164	0.00833333		1	160.871	0.128578	160.743	0.257157	161	0.00159725	0.00158917
		0.9734	1164	5	1159	10	1169	0.00855432	0.00833333		1	161.871	0.129441	161.741	0.258882	162	0.00159803	0.00158917
		0.9731	1165	5	1160	10	1170	0.00854701	0.00833333		1	162.87	0.130305	162.739	0.26061	163	0.00159884	0.00158917
		0.9727	1166	5	1161	10	1171	0.00853971	0.00833333		1	163.869	0.131172	163.738	0.262343	164	0.00159965	0.00158917
		0.9725	1167	5	1162	10	1172	0.00853242	0.00833333		1	164.868	0.13204	164.736	0.26408	165	0.00160048	0.00158917
		0.9723	1174	5	1169	10	1179	0.00848176	0.00833333		1	165.867	0.13291	165.734	0.265821	166	0.00160133	0.00158917
		0.9722	1176	5	1171	10	1181	0.0084674	0.00833333		1	166.866	0.133783	166.732	0.267566	167	0.00160219	0.00158917
		0.9721	1177	5	1172	10	1182	0.00846024	0.00833333		1	167.865	0.134657	167.731	0.269315	168	0.00160306	0.00158917
		0.9717	1178	5	1173	10	1183	0.00845309	0.00833333		1	168.864	0.135534	168.729	0.271068	169	0.00160395	0.00158917
		0.9714	1179	5	1174	10	1184	0.00844595	0.00833333		1	169.864	0.136413	169.727	0.272825	170	0.00160485	0.00158917
		0.9712	1180	5	1175	10	1185	0.00843882	0.00833333		1	170.863	0.137293	170.725	0.274587	171	0.00160577	0.00158917
		0.9709	1181	5	1176	10	1186	0.0084317	0.00833333		1	171.862	0.138176	171.724	0.276353	172	0.0016067	0.00158917
		0.9707	1182	5	1177	10	1187	0.0084246	0.00833333		1	172.861	0.139061	172.722	0.278123	173	0.00160765	0.00158917
		0.9703	1183	5	1178	10	1188	0.00841751	0.00833333		1	173.86	0.139949	173.72	0.279897	174	0.00160861	0.00158917
		0.97	1186	5	1181	10	1191	0.00839631	0.00833333		1	174.859	0.140838	174.718	0.281677	175	0.00160958	0.00158917
		0.9699	1187	5	1182	10	1192	0.00838926	0.00833333		1	175.858	0.14173	175.717	0.28346	176	0.00161057	0.00158917
		0.9694	1188	5	1183	10	1193	0.00838223	0.00833333		1	176.857	0.142624	176.715	0.285248	177	0.00161157	0.00158917
		0.9693	1189	5	1184	10	1194	0.00837521	0.00833333		1	177.856	0.14352	177.713	0.287041	178	0.00161259	0.00158917
		0.9691	1190	5	1185	10	1195	0.0083682	0.00833333		1	178.856	0.144419	178.711	0.288838	179	0.00161362	0.00158917
		0.9686	1191	5	1186	10	1196	0.0083612	0.00833333		1	179.855	0.14532	179.709	0.29064	180	0.00161467	0.00158917
		0.9684	1192	5	1187	10	1197	0.00835422	0.00833333		1	180.854	0.146223	180.708	0.292446	181	0.00161573	0.00158917
		0.9674	1193	5	1188	10	1198	0.00834725	0.00833333		1	181.853	0.147129	181.706	0.294258	182	0.0016168	0.00158917
		0.9673	1194	5	1189	10	1199	0.00834028	0.00833333		1	182.852	0.148037	182.704	0.296074	183	0.00161789	0.00158917
		0.967	1195	5	1190	10	1200	0.00833333	0.00833333		1	183.851	0.148947	183.702	0.297895	184	0.00161899	0.00158917
		0.9666	1195	6	1189	12	1201	0.00999167	0.00957702		1	184.85	0.14986	184.7	0.29972	185	0.00162011	0.00158917
		0.9665	1196	6	1190	12	1202	0.00998336	0.00957702		1	185.849	0.150775	185.698	0.301551	186	0.00162124	0.00158917
		0.9664	1199	6	1193	12	1205	0.00995851	0.00957702		1	186.848	0.151693	186.697	0.303386	187	0.00162239	0.00158917
		0.9655	1200	6	1194	12	1206	0.00995025	0.00957702		1	187.847	0.152613	187.695	0.305227	188	0.00162355	0.00158917
		0.9654	1201	6	1195	12	1207	0.009942	0.00957702		1	188.846	0.153536	188.693	0.307072	189	0.00162472	0.00158917
		0.9651	1202	6	1196	12	1208	0.00993377	0.00957702		1	189.846	0.154461	189.691	0.308923	190	0.00162591	0.00158917
		0.9645	1204	6	1198	12	1210	0.00991736	0.00957702		1	190.845	0.155389	190.689	0.310778	191	0.00162711	0.00158917
		0.9636	1207	6	1201	12	1213	0.00989283	0.00957702		1	191.844	0.15632	191.687	0.312639	192	0.00162833	0.00158917
		0.9634	1208	6	1202	12	1214	0.00988468	0.00957702		1	192.843	0.157252	192.685	0.314505	193	0.00162956	0.00158917
		0.9633	1209	6	1203	12	1215	0.00987654	0.00957702		1	193.842	0.158188	193.684	0.316376	194	0.0016308	0.00158917
		0.9632	1210	6	1204	12	1216	0.00986842	0.00957702		1	194.841	0.159126	194.682	0.318252	195	0.00163206	0.00158917
		0.9629	1211	6	1205	12	1217	0.00986031	0.00957702		1	195.84	0.160067	195.68	0.320134	196	0.00163334	0.00158917
		0.9626	1212	6	1206	12	1218	0.00985222	0.00957702		1	196.839	0.16101	196.678	0.322021	197	0.00163462	0.00158917
		0.9621	1213	6	1207	12	1219	0.00984413	0.00957702		1	197.838	0.161956	197.676	0.323913	198	0.00163592	0.00158917
		0.962	1215	6	1209	12	1221	0.00982801	0.00957702		1	198.837	0.162905	198.674	0.32581	199	0.00163724	0.00158917
		0.9619	1216	6	1210	12	1222	0.00981997	0.00957702		1	199.836	0.163856	199.672	0.327713	200	0.00163856	0.00158917
		0.9617	1217	6	1211	12	1223	0.00981194	0.00957702		1	200.835	0.164811	200.67	0.329621	201	0.00163991	0.00158917
		0.9611	1218	6	1212	12	1224	0.00980392	0.00957702		1	201.834	0.165767	201.668	0.331535	202	0.00164126	0.00158917
		0.9606	1219	6	1213	12	1225	0.00979592	0.00957702		1	202.833	0.166727	202.667	0.333454	203	0.00164263	0.00158917
		0.9601	1220	6	1214	12	1226	0.00978793	0.00957702		1	203.832	0.167689	203.665	0.335379	204	0.00164401	0.00158917
		0.9597	1222	6	1216	12	1228	0.00977199	0.00957702		1	204.831	0.168655	204.663	0.337309	205	0.00164541	0.00158917
		0.9596	1223	6	1217	12	1229	0.00976404	0.00957702		1	205.83	0.169623	205.661	0.339245	206	0.00164682	0.00158917
		0.9594	1224	6	1218	12	1230	0.0097561	0.00957702		1	206.829	0.170593	206.659	0.341187	207	0.00164824	0.00158917
		0.959	1225	6	1219	12	1231	0.00974817	0.00957702		1	207.828	0.171567	207.657	0.343134	208	0.00164968	0.00158917
		0.9589	1226	6	1220	12	1232	0.00974026	0.00957702		1	208.827	0.172543	208.655	0.345087	209	0.00165113	0.00158917
		0.9584	1228	6	1222	12	1234	0.00972447	0.00957702		1	209.826	0.173523	209.653	0.347045	210	0.0016526	0.00158917
		0.9573	1229	6	1223	12	1235	0.0097166	0.00957702		0.9999	210.825	0.174505	210.651	0.349009	211	0.00165407	0.00236232
		0.9571	1230	6	1224	12	1236	0.00970874	0.00957702		0.9999	211.825	0.17549	211.649	0.350979	212	0.00165556	0.00236232
		0.9561	1231	6	1225	12	1237	0.00970089	0.00957702		0.9999	212.824	0.176478	212.647	0.352955	213	0.00165707	0.00236232
		0.9559	1232	6	1226	12	1238	0.00969305	0.00957702		0.9999	213.823	0.177468	213.645	0.354937	214	0.00165858	0.00236232
		0.9558	1233	6	1227	12	1239	0.00968523	0.00957702		0.9999	214.822	0.178462	214.643	0.356924	215	0.00166011	0.00236232
		0.9556	1234	6	1228	12	1240	0.00967742	0.00957702		0.9999	215.821	0.179459	215.641	0.358918	216	0.00166166	0.00236232
		0.9552	1237	6	1231	12	1243	0.00965406	0.00957702		0.9999	216.82	0.180458	216.639	0.360917	217	0.00166321	0.00236232
		0.955	1238	6	1232	12	1244	0.0096463	0.00957702		0.9999	217.819	0.181461	217.637	0.362922	218	0.00166478	0.00236232
		0.9547	1239	6	1233	12	1245	0.00963855	0.00957702		0.9999	218.818	0.182467	218.635	0.364933	219	0.00166636	0.00236232
		0.9546	1240	6	1234	12	1246	0.00963082	0.00957702		0.9999	219.817	0.183475	219.633	0.36695	220	0.00166796	0.00236232
		0.9537	1241	6	1235	12	1247	0.0096231	0.00957702		0.9999	220.816	0.184487	220.631	0.368973	221	0.00166956	0.00236232
		0.9534	1242	6	1236	12	1248	0.00961538	0.00957702		0.9999	221.814	0.185501	221.629	0.371002	222	0.00167118	0.00236232
		0.9531	1243	6	1237	12	1249	0.00960769	0.00957702		0.9999	222.813	0.186519	222.627	0.373038	223	0.00167281	0.00236232
		0.9526	1244	6	1238	12	1250	0.0096	0.00957702		0.9999	223.812	0.18754	223.625	0.375079	224	0.00167446	0.00236232
		0.9521	1245	6	1239	12	1251	0.00959233	0.00957702		0.9999	224.811	0.188563	224.623	0.377126	225	0.00167612	0.00236232
		0.9519	1246	6	1240	12	1252	0.00958466	0.00957702		0.9999	225.81	0.18959	225.621	0.37918	226	0.00167779	0.00236232
		0.9517	1247	6	1241	12	1253	0.00957702	0.00957702		0.9999	226.809	0.19062	226.619	0.38124	227	0.00167947	0.00236232
		0.9516	1247	7	1240	14	1254	0.0111643	0.010728		0.9999	227.808	0.191653	227.617	0.383306	228	0.00168117	0.00236232
		0.9509	1248	7	1241	14	1255	0.0111554	0.010728		0.9999	228.807	0.192689	228.615	0.385378	229	0.00168287	0.00236232
		0.9508	1249	7	1242	14	1256	0.0111465	0.010728		0.9999	229.806	0.193728	229.613	0.387456	230	0.00168459	0.00236232
		0.9507	1250	7	1243	14	1257	0.0111376	0.010728		0.9999	230.805	0.19477	230.61	0.389541	231	0.00168632	0.00236232
		0.9505	1253	7	1246	14	1260	0.0111111	0.010728		0.9999	231.804	0.195816	231.608	0.391632	232	0.00168807	0.00236232
		0.9502	1254	7	1247	14	1261	0.0111023	0.010728		0.9999	232.803	0.196864	232.606	0.393729	233	0.00168982	0.00236232
		0.9501	1255	7	1248	14	1262	0.0110935	0.010728		0.9999	233.802	0.197916	233.604	0.395832	234	0.00169159	0.00236232
		0.9499	1256	7	1249	14	1263	0.0110847	0.010728		0.9999	234.801	0.198971	234.602	0.397942	235	0.00169337	0.00236232
		0.9493	1257	7	1250	14	1264	0.0110759	0.010728		0.9999	235.8	0.200029	235.6	0.400058	236	0.00169516	0.00236232
		0.9492	1258	7	1251	14	1265	0.0110672	0.010728		0.9999	236.799	0.201091	236.598	0.402181	237	0.00169697	0.00236232
		0.9491	1259	7	1252	14	1266	0.0110585	0.010728		0.9999	237.798	0.202155	237.596	0.40431	238	0.00169878	0.00236232
		0.9479	1260	7	1253	14	1267	0.0110497	0.010728		0.9999	238.797	0.203223	238.594	0.406446	239	0.00170061	0.00236232
		0.9472	1262	7	1255	14	1269	0.0110323	0.010728		0.9999	239.796	0.204294	239.591	0.408587	240	0.00170245	0.00236232
		0.947	1263	7	1256	14	1270	0.0110236	0.010728		0.9999	240.795	0.205368	240.589	0.410736	241	0.0017043	0.00236232
		0.9466	1267	7	1260	14	1274	0.010989	0.010728		0.9999	241.794	0.206445	241.587	0.412891	242	0.00170616	0.00236232
		0.946	1269	7	1262	14	1276	0.0109718	0.010728		0.9999	242.792	0.207526	242.585	0.415052	243	0.00170803	0.00236232
		0.9458	1270	7	1263	14	1277	0.0109632	0.010728		0.9999	243.791	0.20861	243.583	0.41722	244	0.00170992	0.00236232
		0.9453	1271	7	1264	14	1278	0.0109546	0.010728		0.9999	244.79	0.209697	244.581	0.419395	245	0.00171182	0.00236232
		0.9451	1272	7	1265	14	1279	0.0109461	0.010728		0.9999	245.789	0.210788	245.578	0.421576	246	0.00171372	0.00236232
		0.945	1273	7	1266	14	1280	0.0109375	0.010728		0.9999	246.788	0.211882	246.576	0.423764	247	0.00171564	0.00236232
		0.9444	1274	7	1267	14	1281	0.010929	0.010728		0.9999	247.787	0.212979	247.574	0.425958	248	0.00171757	0.00236232
		0.9437	1276	7	1269	14	1283	0.0109119	0.010728		0.9999	248.786	0.214079	248.572	0.428159	249	0.00171951	0.00236232
		0.9429	1277	7	1270	14	1284	0.0109034	0.010728		0.9999	249.785	0.215183	249.57	0.430367	250	0.00172147	0.00236232
		0.9426	1279	7	1272	14	1286	0.0108865	0.010728		0.9999	250.784	0.21629	250.567	0.432581	251	0.00172343	0.00236232
		0.9423	1281	7	1274	14	1288	0.0108696	0.010728		0.9999	251.783	0.217401	251.565	0.434802	252	0.0017254	0.00236232
		0.9421	1288	7	1281	14	1295	0.0108108	0.010728		0.9999	252.781	0.218515	252.563	0.43703	253	0.00172739	0.00236232
		0.9419	1289	7	1282	14	1296	0.0108025	0.010728		0.9999	253.78	0.219632	253.561	0.439264	254	0.00172939	0.00236232
		0.9416	1295	7	1288	14	1302	0.0107527	0.010728		0.9999	254.779	0.220753	254.558	0.441505	255	0.00173139	0.00236232
		0.9411	1296	7	1289	14	1303	0.0107444	0.010728		0.9999	255.778	0.221877	255.556	0.443753	256	0.00173341	0.00236232
		0.9406	1297	7	1290	14	1304	0.0107362	0.010728		0.9999	256.777	0.223004	256.554	0.446008	257	0.00173544	0.00236232
		0.9402	1298	7	1291	14	1305	0.010728	0.010728		0.9999	257.776	0.224135	257.552	0.44827	258	0.00173748	0.00236232
		0.9399	1298	8	1290	16	1306	0.0122511	0.0119492		0.9999	258.775	0.225269	258.549	0.450538	259	0.00173953	0.00236232
		0.9395	1299	8	1291	16	1307	0.0122418	0.0119492		0.9999	259.774	0.226407	259.547	0.452813	260	0.00174159	0.00236232
		0.9383	1301	8	1293	16	1309	0.0122231	0.0119492		0.9999	260.772	0.227548	260.545	0.455096	261	0.00174366	0.00236232
		0.9382	1302	8	1294	16	1310	0.0122137	0.0119492		0.9999	261.771	0.228692	261.543	0.457385	262	0.00174574	0.00236232
		0.9367	1304	8	1296	16	1312	0.0121951	0.0119492		0.9999	262.77	0.22984	262.54	0.459681	263	0.00174783	0.00236232
		0.9349	1305	8	1297	16	1313	0.0121858	0.0119492		0.9999	263.769	0.230992	263.538	0.461983	264	0.00174994	0.00236232
		0.9348	1306	8	1298	16	1314	0.0121766	0.0119492		0.9999	264.768	0.232147	264.536	0.464293	265	0.00175205	0.00236232
		0.9346	1307	8	1299	16	1315	0.0121673	0.0119492		0.9999	265.767	0.233305	265.533	0.46661	266	0.00175417	0.00236232
		0.9344	1309	8	1301	16	1317	0.0121488	0.0119492		0.9999	266.766	0.234467	266.531	0.468934	267	0.00175631	0.00236232
		0.9343	1310	8	1302	16	1318	0.0121396	0.0119492		0.9999	267.764	0.235632	267.529	0.471264	268	0.00175845	0.00236232
		0.9329	1311	8	1303	16	1319	0.0121304	0.0119492		0.9999	268.763	0.236801	268.526	0.473602	269	0.0017606	0.00236232
		0.9322	1312	8	1304	16	1320	0.0121212	0.0119492		0.9999	269.762	0.237973	269.524	0.475947	270	0.00176277	0.00236232
		0.932	1313	8	1305	16	1321	0.012112	0.0119492		0.9999	270.761	0.239149	270.522	0.478298	271	0.00176494	0.00236232
		0.93	1315	8	1307	16	1323	0.0120937	0.0119492		0.9999	271.76	0.240329	271.519	0.480657	272	0.00176712	0.00236232
		0.9298	1316	8	1308	16	1324	0.0120846	0.0119492		0.9999	272.758	0.241512	272.517	0.483023	273	0.00176932	0.00236232
		0.9295	1317	8	1309	16	1325	0.0120755	0.0119492		0.9999	273.757	0.242698	273.515	0.485396	274	0.00177152	0.00236232
		0.929	1318	8	1310	16	1326	0.0120664	0.0119492		0.9999	274.756	0.243888	274.512	0.487776	275	0.00177373	0.00236232
		0.9279	1319	8	1311	16	1327	0.0120573	0.0119492		0.9999	275.755	0.245082	275.51	0.490163	276	0.00177595	0.00236232
		0.9271	1320	8	1312	16	1328	0.0120482	0.0119492		0.9999	276.754	0.246279	276.507	0.492557	277	0.00177819	0.00236232
		0.9269	1322	8	1314	16	1330	0.0120301	0.0119492		0.9999	277.753	0.247479	277.505	0.494959	278	0.00178043	0.00236232
		0.9266	1323	8	1315	16	1331	0.012021	0.0119492		0.9999	278.751	0.248684	278.503	0.497368	279	0.00178268	0.00236232
		0.9264	1324	8	1316	16	1332	0.012012	0.0119492		0.9999	279.75	0.249892	279.5	0.499783	280	0.00178494	0.00236232
		0.9261	1325	8	1317	16	1333	0.012003	0.0119492		0.9999	280.749	0.251103	280.498	0.502206	281	0.00178721	0.00236232
		0.9259	1326	8	1318	16	1334	0.011994	0.0119492		0.9999	281.748	0.252318	281.495	0.504637	282	0.00178949	0.00236232
		0.9258	1327	8	1319	16	1335	0.011985	0.0119492		0.9999	282.746	0.253537	282.493	0.507074	283	0.00179178	0.00236232
		0.9253	1328	8	1320	16	1336	0.011976	0.0119492		0.9999	283.745	0.254759	283.49	0.509519	284	0.00179408	0.00236232
		0.9244	1329	8	1321	16	1337	0.0119671	0.0119492		0.9999	284.744	0.255985	284.488	0.511971	285	0.00179639	0.00236232
		0.9243	1330	8	1322	16	1338	0.0119581	0.0119492		0.9999	285.743	0.257215	285.486	0.51443	286	0.00179871	0.00236232
		0.9241	1331	8	1323	16	1339	0.0119492	0.0119492		0.9999	286.742	0.258448	286.483	0.516896	287	0.00180103	0.00236232
		0.9234	1331	9	1322	18	1340	0.0134328	0.0131868		0.9999	287.74	0.259685	287.481	0.51937	288	0.00180337	0.00236232
		0.9232	1332	9	1323	18	1341	0.0134228	0.0131868		0.9999	288.739	0.260926	288.478	0.521851	289	0.00180571	0.00236232
		0.9227	1333	9	1324	18	1342	0.0134128	0.0131868		0.9999	289.738	0.26217	289.476	0.52434	290	0.00180807	0.00236232
		0.9216	1334	9	1325	18	1343	0.0134028	0.0131868		0.9999	290.737	0.263418	290.473	0.526836	291	0.00181043	0.00236232
		0.9207	1335	9	1326	18	1344	0.0133929	0.0131868		0.9999	291.735	0.264669	291.471	0.529339	292	0.0018128	0.00236232
		0.9181	1337	9	1328	18	1346	0.013373	0.0131868		0.9999	292.734	0.265925	292.468	0.53185	293	0.00181519	0.00236232
		0.9175	1338	9	1329	18	1347	0.013363	0.0131868		0.9999	293.733	0.267184	293.466	0.534368	294	0.00181758	0.00236232
		0.9172	1339	9	1330	18	1348	0.0133531	0.0131868		0.9999	294.732	0.268446	294.463	0.536893	295	0.00181998	0.00236232
		0.9167	1340	9	1331	18	1349	0.0133432	0.0131868		0.9999	295.73	0.269713	295.461	0.539426	296	0.00182238	0.00236232
		0.916	1341	9	1332	18	1350	0.0133333	0.0131868		0.9999	296.729	0.270983	296.458	0.541966	297	0.0018248	0.00236232
		0.9156	1342	9	1333	18	1351	0.0133235	0.0131868		0.9999	297.728	0.272257	297.455	0.544514	298	0.00182723	0.00236232
		0.915	1344	9	1335	18	1353	0.0133038	0.0131868		0.9999	298.726	0.273535	298.453	0.547069	299	0.00182966	0.00236232
		0.9149	1345	9	1336	18	1354	0.0132939	0.0131868		0.9999	299.725	0.274816	299.45	0.549632	300	0.00183211	0.00236232
		0.914	1346	9	1337	18	1355	0.0132841	0.0131868		0.9999	300.724	0.276101	300.448	0.552202	301	0.00183456	0.00236232
		0.9139	1347	9	1338	18	1356	0.0132743	0.0131868		0.9999	301.723	0.27739	301.445	0.55478	302	0.00183702	0.00236232
		0.9135	1350	9	1341	18	1359	0.013245	0.0131868		0.9999	302.721	0.278683	302.443	0.557365	303	0.00183949	0.00236232
		0.9117	1351	9	1342	18	1360	0.0132353	0.0131868		0.9999	303.72	0.279979	303.44	0.559958	304	0.00184197	0.00236232
		0.9104	1352	9	1343	18	1361	0.0132256	0.0131868		0.9999	304.719	0.281279	304.437	0.562558	305	0.00184445	0.00236232
		0.9099	1353	9	1344	18	1362	0.0132159	0.0131868		0.9999	305.717	0.282583	305.435	0.565166	306	0.00184695	0.00236232
		0.9094	1354	9	1345	18	1363	0.0132062	0.0131868		0.9999	306.716	0.283891	306.432	0.567782	307	0.00184945	0.00236232
		0.9091	1355	9	1346	18	1364	0.0131965	0.0131868		0.9999	307.715	0.285203	307.43	0.570405	308	0.00185197	0.00236232
		0.9084	1356	9	1347	18	1365	0.0131868	0.0131868		0.9999	308.713	0.286518	308.427	0.573036	309	0.00185449	0.00236232
		0.9071	1356	10	1346	20	1366	0.0146413	0.0145455		0.9999	309.712	0.287837	309.424	0.575675	310	0.00185702	0.00236232
		0.9069	1357	10	1347	20	1367	0.0146306	0.0145455		0.9999	310.711	0.28916	310.422	0.578321	311	0.00185955	0.00236232
		0.9048	1358	10	1348	20	1368	0.0146199	0.0145455		0.9999	311.71	0.290487	311.419	0.580975	312	0.0018621	0.00236232
		0.9045	1359	10	1349	20	1369	0.0146092	0.0145455		0.9999	312.708	0.291818	312.416	0.583636	313	0.00186465	0.00236232
		0.9042	1360	10	1350	20	1370	0.0145985	0.0145455		0.9999	313.707	0.293153	313.414	0.586306	314	0.00186722	0.00236232
		0.9025	1361	10	1351	20	1371	0.0145879	0.0145455		0.9999	314.706	0.294491	314.411	0.588983	315	0.00186979	0.00236232
		0.9023	1362	10	1352	20	1372	0.0145773	0.0145455		0.9999	315.704	0.295834	315.408	0.591667	316	0.00187236	0.00236232
		0.902	1363	10	1353	20	1373	0.0145666	0.0145455		0.9999	316.703	0.29718	316.406	0.59436	317	0.00187495	0.00236232
		0.8977	1364	10	1354	20	1374	0.014556	0.0145455		0.9999	317.701	0.29853	317.403	0.59706	318	0.00187755	0.00236232
		0.8974	1365	10	1355	20	1375	0.0145455	0.0145455		0.9999	318.7	0.299884	318.4	0.599768	319	0.00188015	0.00236232
		0.8972	1365	11	1354	22	1376	0.0159884	0.015919		0.9999	319.699	0.301242	319.398	0.602484	320	0.00188276	0.00236232
		0.8969	1366	11	1355	22	1377	0.0159768	0.015919		0.9999	320.697	0.302604	320.395	0.605207	321	0.00188538	0.00236232
		0.8959	1368	11	1357	22	1379	0.0159536	0.015919		0.9999	321.696	0.303969	321.392	0.607939	322	0.00188801	0.00236232
		0.8957	1369	11	1358	22	1380	0.015942	0.015919		0.9999	322.695	0.305339	322.389	0.610678	323	0.00189064	0.00236232
		0.8954	1370	11	1359	22	1381	0.0159305	0.015919		0.9999	323.693	0.306713	323.387	0.613425	324	0.00189329	0.00236232
		0.8948	1371	11	1360	22	1382	0.015919	0.015919		0.9999	324.692	0.30809	324.384	0.61618	325	0.00189594	0.00236232
		0.8933	1371	12	1359	24	1383	0.0173536	0.017229		0.9999	325.691	0.309472	325.381	0.618943	326	0.0018986	0.00236232
		0.8928	1372	12	1360	24	1384	0.017341	0.017229		0.9999	326.689	0.310857	326.378	0.621714	327	0.00190127	0.00236232
		0.8922	1373	12	1361	24	1385	0.0173285	0.017229		0.9999	327.688	0.312247	327.376	0.624493	328	0.00190394	0.00236232
		0.8913	1374	12	1362	24	1386	0.017316	0.017229		0.9999	328.686	0.31364	328.373	0.62728	329	0.00190663	0.00236232
		0.8907	1375	12	1363	24	1387	0.0173035	0.017229		0.9999	329.685	0.315037	329.37	0.630074	330	0.00190932	0.00236232
		0.8905	1378	12	1366	24	1390	0.0172662	0.017229		0.9999	330.684	0.316439	330.367	0.632877	331	0.00191202	0.00236232
		0.8895	1379	12	1367	24	1391	0.0172538	0.017229		0.9999	331.682	0.317844	331.364	0.635688	332	0.00191472	0.00236232
		0.8882	1380	12	1368	24	1392	0.0172414	0.017229		0.9999	332.681	0.319253	332.361	0.638506	333	0.00191744	0.00236232
		0.8867	1381	12	1369	24	1393	0.017229	0.017229		0.9999	333.679	0.320667	333.359	0.641333	334	0.00192016	0.00236232
		0.8863	1381	13	1368	26	1394	0.0186514	0.0184659		0.9998	334.678	0.322084	334.356	0.644168	335	0.00192289	0.0031009
		0.8859	1382	13	1369	26	1395	0.018638	0.0184659		0.9998	335.676	0.323505	335.353	0.647011	336	0.00192563	0.0031009
		0.8853	1383	13	1370	26	1396	0.0186246	0.0184659		0.9998	336.675	0.324931	336.35	0.649862	337	0.00192837	0.0031009
		0.8839	1384	13	1371	26	1397	0.0186113	0.0184659		0.9998	337.674	0.32636	337.347	0.65272	338	0.00193113	0.0031009
		0.8832	1385	13	1372	26	1398	0.018598	0.0184659		0.9998	338.672	0.327794	338.344	0.655588	339	0.00193389	0.0031009
		0.8829	1386	13	1373	26	1399	0.0185847	0.0184659		0.9998	339.671	0.329231	339.342	0.658463	340	0.00193665	0.0031009
		0.8811	1387	13	1374	26	1400	0.0185714	0.0184659		0.9998	340.669	0.330673	340.339	0.661346	341	0.00193943	0.0031009
		0.8802	1388	13	1375	26	1401	0.0185582	0.0184659		0.9998	341.668	0.332119	341.336	0.664237	342	0.00194221	0.0031009
		0.8801	1389	13	1376	26	1402	0.0185449	0.0184659		0.9998	342.666	0.333569	342.333	0.667137	343	0.00194501	0.0031009
		0.88	1391	13	1378	26	1404	0.0185185	0.0184659		0.9998	343.665	0.335022	343.33	0.670045	344	0.0019478	0.0031009
		0.8798	1392	13	1379	26	1405	0.0185053	0.0184659		0.9998	344.664	0.33648	344.327	0.672961	345	0.00195061	0.0031009
		0.8796	1393	13	1380	26	1406	0.0184922	0.0184659		0.9998	345.662	0.337943	345.324	0.675885	346	0.00195343	0.0031009
		0.8793	1394	13	1381	26	1407	0.018479	0.0184659		0.9998	346.661	0.339409	346.321	0.678818	347	0.00195625	0.0031009
		0.8786	1395	13	1382	26	1408	0.0184659	0.0184659		0.9998	347.659	0.340879	347.318	0.681758	348	0.00195908	0.0031009
		0.8781	1395	14	1381	28	1409	0.0198722	0.019788		0.9998	348.658	0.342354	348.315	0.684707	349	0.00196191	0.0031009
		0.8771	1396	14	1382	28	1410	0.0198582	0.019788		0.9998	349.656	0.343832	349.312	0.687665	350	0.00196476	0.0031009
		0.8766	1397	14	1383	28	1411	0.0198441	0.019788		0.9998	350.655	0.345315	350.309	0.69063	351	0.00196761	0.0031009
		0.8752	1398	14	1384	28	1412	0.01983	0.019788		0.9998	351.653	0.346802	351.306	0.693604	352	0.00197047	0.0031009
		0.8745	1399	14	1385	28	1413	0.019816	0.019788		0.9998	352.652	0.348293	352.303	0.696586	353	0.00197333	0.0031009
		0.8744	1400	14	1386	28	1414	0.019802	0.019788		0.9998	353.65	0.349788	353.3	0.699577	354	0.00197621	0.0031009
		0.8721	1401	14	1387	28	1415	0.019788	0.019788		0.9998	354.649	0.351288	354.297	0.702576	355	0.00197909	0.0031009
		0.872	1401	15	1386	30	1416	0.0211864	0.0211715		0.9998	355.647	0.352792	355.294	0.705583	356	0.00198198	0.0031009
		0.8714	1402	15	1387	30	1417	0.0211715	0.0211715		0.9998	356.646	0.3543	356.291	0.708599	357	0.00198487	0.0031009
		0.8713	1402	16	1386	32	1418	0.022567	0.0225352		0.9998	357.644	0.355812	357.288	0.711623	358	0.00198777	0.0031009
		0.8682	1404	16	1388	32	1420	0.0225352	0.0225352		0.9998	358.643	0.357328	358.285	0.714656	359	0.00199069	0.0031009
		0.8679	1404	17	1387	34	1421	0.0239268	0.0235294		0.9998	359.641	0.358849	359.282	0.717697	360	0.0019936	0.0031009
		0.8661	1405	17	1388	34	1422	0.02391	0.0235294		0.9998	360.64	0.360373	360.279	0.720747	361	0.00199653	0.0031009
		0.8655	1407	17	1390	34	1424	0.0238764	0.0235294		0.9998	361.638	0.361902	361.276	0.723805	362	0.00199946	0.0031009
		0.8647	1408	17	1391	34	1425	0.0238596	0.0235294		0.9998	362.637	0.363436	362.273	0.726872	363	0.0020024	0.0031009
		0.8642	1410	17	1393	34	1427	0.0238262	0.0235294		0.9998	363.635	0.364973	363.27	0.729947	364	0.00200535	0.0031009
		0.8633	1411	17	1394	34	1428	0.0238095	0.0235294		0.9998	364.633	0.366515	364.267	0.73303	365	0.0020083	0.0031009
		0.8626	1412	17	1395	34	1429	0.0237929	0.0235294		0.9998	365.632	0.368061	365.264	0.736123	366	0.00201126	0.0031009
		0.8616	1414	17	1397	34	1431	0.0237596	0.0235294		0.9998	366.63	0.369612	366.261	0.739224	367	0.00201423	0.0031009
		0.8609	1416	17	1399	34	1433	0.0237264	0.0235294		0.9998	367.629	0.371167	367.258	0.742333	368	0.00201721	0.0031009
		0.8601	1417	17	1400	34	1434	0.0237099	0.0235294		0.9998	368.627	0.372726	368.255	0.745451	369	0.00202019	0.0031009
		0.8593	1418	17	1401	34	1435	0.0236934	0.0235294		0.9998	369.626	0.374289	369.251	0.748578	370	0.00202318	0.0031009
		0.8577	1419	17	1402	34	1436	0.0236769	0.0235294		0.9998	370.624	0.375857	370.248	0.751714	371	0.00202618	0.0031009
		0.856	1420	17	1403	34	1437	0.0236604	0.0235294		0.9998	371.623	0.377429	371.245	0.754858	372	0.00202919	0.0031009
		0.8543	1421	17	1404	34	1438	0.0236439	0.0235294		0.9998	372.621	0.379005	372.242	0.758011	373	0.0020322	0.0031009
		0.8529	1422	17	1405	34	1439	0.0236275	0.0235294		0.9998	373.619	0.380586	373.239	0.761172	374	0.00203522	0.0031009
		0.8527	1423	17	1406	34	1440	0.0236111	0.0235294		0.9998	374.618	0.382171	374.236	0.764343	375	0.00203825	0.0031009
		0.8526	1424	17	1407	34	1441	0.0235947	0.0235294		0.9998	375.616	0.383761	375.232	0.767522	376	0.00204128	0.0031009
		0.8525	1427	17	1410	34	1444	0.0235457	0.0235294		0.9998	376.615	0.385355	376.229	0.770709	377	0.00204432	0.0031009
		0.8521	1428	17	1411	34	1445	0.0235294	0.0235294		0.9998	377.613	0.386953	377.226	0.773906	378	0.00204737	0.0031009
		0.8493	1428	18	1410	36	1446	0.0248963	0.0246575		0.9998	378.611	0.388556	378.223	0.777112	379	0.00205043	0.0031009
		0.849	1429	18	1411	36	1447	0.0248791	0.0246575		0.9998	379.61	0.390163	379.22	0.780326	380	0.00205349	0.0031009
		0.8469	1430	18	1412	36	1448	0.0248619	0.0246575		0.9998	380.608	0.391775	380.216	0.783549	381	0.00205656	0.0031009
		0.8463	1431	18	1413	36	1449	0.0248447	0.0246575		0.9998	381.607	0.393391	381.213	0.786781	382	0.00205964	0.0031009
		0.8454	1432	18	1414	36	1450	0.0248276	0.0246575		0.9998	382.605	0.395011	382.21	0.790022	383	0.00206272	0.0031009
		0.8438	1433	18	1415	36	1451	0.0248105	0.0246575		0.9998	383.603	0.396636	383.207	0.793272	384	0.00206581	0.0031009
		0.8436	1434	18	1416	36	1452	0.0247934	0.0246575		0.9998	384.602	0.398266	384.203	0.796531	385	0.00206891	0.0031009
		0.8435	1435	18	1417	36	1453	0.0247763	0.0246575		0.9998	385.6	0.3999	385.2	0.799799	386	0.00207202	0.0031009
		0.8432	1436	18	1418	36	1454	0.0247593	0.0246575		0.9998	386.598	0.401538	386.197	0.803076	387	0.00207513	0.0031009
		0.8421	1437	18	1419	36	1455	0.0247423	0.0246575		0.9998	387.597	0.403181	387.194	0.806362	388	0.00207825	0.0031009
		0.8419	1438	18	1420	36	1456	0.0247253	0.0246575		0.9998	388.595	0.404828	388.19	0.809657	389	0.00208138	0.0031009
		0.8406	1440	18	1422	36	1458	0.0246914	0.0246575		0.9998	389.594	0.40648	389.187	0.81296	390	0.00208451	0.0031009
		0.8383	1441	18	1423	36	1459	0.0246744	0.0246575		0.9998	390.592	0.408137	390.184	0.816273	391	0.00208766	0.0031009
		0.8382	1442	18	1424	36	1460	0.0246575	0.0246575		0.9998	391.59	0.409798	391.18	0.819596	392	0.0020908	0.0031009
		0.838	1443	19	1424	38	1462	0.0259918	0.0258679		0.9998	392.589	0.411463	392.177	0.822927	393	0.00209396	0.0031009
		0.8369	1444	19	1425	38	1463	0.025974	0.0258679		0.9998	393.587	0.413134	393.174	0.826267	394	0.00209712	0.0031009
		0.8367	1445	19	1426	38	1464	0.0259563	0.0258679		0.9998	394.585	0.414808	394.17	0.829617	395	0.00210029	0.0031009
		0.8365	1446	19	1427	38	1465	0.0259386	0.0258679		0.9998	395.584	0.416488	395.167	0.832975	396	0.00210347	0.0031009
		0.8344	1447	19	1428	38	1466	0.0259209	0.0258679		0.9998	396.582	0.418172	396.164	0.836343	397	0.00210666	0.0031009
		0.8342	1448	19	1429	38	1467	0.0259032	0.0258679		0.9998	397.58	0.41986	397.16	0.83972	398	0.00210985	0.0031009
		0.8296	1449	19	1430	38	1468	0.0258856	0.0258679		0.9998	398.578	0.421553	398.157	0.843106	399	0.00211305	0.0031009
		0.8279	1450	19	1431	38	1469	0.0258679	0.0258679		0.9997	399.577	0.423251	399.153	0.846502	400	0.00211625	0.00362492
		0.8273	1450	20	1430	40	1470	0.0272109	0.0262985		0.9997	400.575	0.424953	400.15	0.849907	401	0.00211947	0.00362492
		0.8272	1452	20	1432	40	1472	0.0271739	0.0262985		0.9997	401.573	0.426661	401.147	0.853321	402	0.00212269	0.00362492
		0.8267	1453	20	1433	40	1473	0.0271555	0.0262985		0.9997	402.572	0.428372	402.143	0.856745	403	0.00212592	0.00362492
		0.8251	1455	20	1435	40	1475	0.0271186	0.0262985		0.9997	403.57	0.430089	403.14	0.860177	404	0.00212915	0.00362492
		0.8245	1457	20	1437	40	1477	0.0270819	0.0262985		0.9997	404.568	0.43181	404.136	0.86362	405	0.00213239	0.00362492
		0.8228	1458	20	1438	40	1478	0.0270636	0.0262985		0.9997	405.566	0.433536	405.133	0.867071	406	0.00213564	0.00362492
		0.8227	1459	20	1439	40	1479	0.0270453	0.0262985		0.9997	406.565	0.435266	406.129	0.870532	407	0.0021389	0.00362492
		0.8219	1460	20	1440	40	1480	0.027027	0.0262985		0.9997	407.563	0.437001	407.126	0.874003	408	0.00214216	0.00362492
		0.8209	1461	20	1441	40	1481	0.0270088	0.0262985		0.9997	408.561	0.438741	408.123	0.877483	409	0.00214543	0.00362492
		0.8204	1462	20	1442	40	1482	0.0269906	0.0262985		0.9997	409.56	0.440486	409.119	0.880972	410	0.00214871	0.00362492
		0.8192	1464	20	1444	40	1484	0.0269542	0.0262985		0.9997	410.558	0.442236	410.116	0.884471	411	0.002152	0.00362492
		0.8187	1465	20	1445	40	1485	0.026936	0.0262985		0.9997	411.556	0.44399	411.112	0.88798	412	0.00215529	0.00362492
		0.818	1466	20	1446	40	1486	0.0269179	0.0262985		0.9997	412.554	0.445749	412.109	0.891498	413	0.00215859	0.00362492
		0.8159	1467	20	1447	40	1487	0.0268998	0.0262985		0.9997	413.552	0.447513	413.105	0.895026	414	0.0021619	0.00362492
		0.8149	1468	20	1448	40	1488	0.0268817	0.0262985		0.9997	414.551	0.449282	414.101	0.898563	415	0.00216521	0.00362492
		0.8146	1469	20	1449	40	1489	0.0268637	0.0262985		0.9997	415.549	0.451055	415.098	0.90211	416	0.00216853	0.00362492
		0.8136	1470	20	1450	40	1490	0.0268456	0.0262985		0.9997	416.547	0.452833	416.094	0.905667	417	0.00217186	0.00362492
		0.8109	1471	20	1451	40	1491	0.0268276	0.0262985		0.9997	417.545	0.454616	417.091	0.909233	418	0.0021752	0.00362492
		0.8105	1472	20	1452	40	1492	0.0268097	0.0262985		0.9997	418.544	0.456404	418.087	0.912809	419	0.00217854	0.00362492
		0.8104	1473	20	1453	40	1493	0.0267917	0.0262985		0.9997	419.542	0.458197	419.084	0.916395	420	0.00218189	0.00362492
		0.81	1474	20	1454	40	1494	0.0267738	0.0262985		0.9997	420.54	0.459995	420.08	0.91999	421	0.00218525	0.00362492
		0.807	1475	20	1455	40	1495	0.0267559	0.0262985		0.9997	421.538	0.461798	421.076	0.923595	422	0.00218861	0.00362492
		0.8067	1476	20	1456	40	1496	0.026738	0.0262985		0.9997	422.536	0.463605	422.073	0.92721	423	0.00219199	0.00362492
		0.8046	1479	20	1459	40	1499	0.0266845	0.0262985		0.9997	423.535	0.465418	423.069	0.930835	424	0.00219537	0.00362492
		0.8036	1482	20	1462	40	1502	0.0266312	0.0262985		0.9997	424.533	0.467235	424.066	0.93447	425	0.00219875	0.00362492
		0.8035	1483	20	1463	40	1503	0.0266134	0.0262985		0.9997	425.531	0.469057	425.062	0.938115	426	0.00220215	0.00362492
		0.8019	1484	20	1464	40	1504	0.0265957	0.0262985		0.9997	426.529	0.470885	426.058	0.941769	427	0.00220555	0.00362492
		0.8013	1485	20	1465	40	1505	0.0265781	0.0262985		0.9997	427.527	0.472717	427.055	0.945434	428	0.00220896	0.00362492
		0.8	1486	20	1466	40	1506	0.0265604	0.0262985		0.9997	428.525	0.474554	428.051	0.949108	429	0.00221237	0.00362492
		0.799	1487	20	1467	40	1507	0.0265428	0.0262985		0.9997	429.524	0.476396	429.047	0.952793	430	0.0022158	0.00362492
		0.7979	1488	20	1468	40	1508	0.0265252	0.0262985		0.9997	430.522	0.478244	430.044	0.956487	431	0.00221923	0.00362492
		0.7977	1489	20	1469	40	1509	0.0265076	0.0262985		0.9997	431.52	0.480096	431.04	0.960192	432	0.00222267	0.00362492
		0.7975	1490	20	1470	40	1510	0.0264901	0.0262985		0.9997	432.518	0.481953	432.036	0.963906	433	0.00222611	0.00362492
		0.7946	1491	20	1471	40	1511	0.0264725	0.0262985		0.9997	433.516	0.483816	433.032	0.967631	434	0.00222956	0.00362492
		0.7945	1492	20	1472	40	1512	0.026455	0.0262985		0.9997	434.514	0.485683	434.029	0.971366	435	0.00223303	0.00362492
		0.7931	1493	20	1473	40	1513	0.0264375	0.0262985		0.9997	435.512	0.487555	435.025	0.975111	436	0.00223649	0.00362492
		0.7927	1494	20	1474	40	1514	0.0264201	0.0262985		0.9997	436.511	0.489433	436.021	0.978866	437	0.00223997	0.00362492
		0.7908	1496	20	1476	40	1516	0.0263852	0.0262985		0.9997	437.509	0.491316	437.017	0.982631	438	0.00224345	0.00362492
		0.7901	1497	20	1477	40	1517	0.0263678	0.0262985		0.9997	438.507	0.493203	438.014	0.986407	439	0.00224694	0.00362492
		0.7886	1498	20	1478	40	1518	0.0263505	0.0262985		0.9997	439.505	0.495096	439.01	0.990193	440	0.00225044	0.00362492
		0.7876	1500	20	1480	40	1520	0.0263158	0.0262985		0.9997	440.503	0.496994	440.006	0.993989	441	0.00225394	0.00362492
		0.7862	1501	20	1481	40	1521	0.0262985	0.0262985		0.9997	441.501	0.498898	441.002	0.997795	442	0.00225746	0.00362492
		0.7853	1501	21	1480	42	1522	0.0275953	0.0269058		0.9997	442.499	0.500806	441.998	1.00161	443	0.00226098	0.00362492
		0.784	1502	21	1481	42	1523	0.0275772	0.0269058		0.9997	443.497	0.50272	442.995	1.00544	444	0.0022645	0.00362492
		0.7826	1503	21	1482	42	1524	0.0275591	0.0269058		0.9997	444.495	0.504638	443.991	1.00928	445	0.00226804	0.00362492
		0.7805	1504	21	1483	42	1525	0.027541	0.0269058		0.9997	445.493	0.506562	444.987	1.01312	446	0.00227158	0.00362492
		0.7793	1506	21	1485	42	1527	0.0275049	0.0269058		0.9997	446.492	0.508491	445.983	1.01698	447	0.00227513	0.00362492
		0.7772	1507	21	1486	42	1528	0.0274869	0.0269058		0.9997	447.49	0.510426	446.979	1.02085	448	0.00227869	0.00362492
		0.7753	1508	21	1487	42	1529	0.0274689	0.0269058		0.9996	448.488	0.512366	447.975	1.02473	449	0.00228225	0.00388466
		0.7751	1511	21	1490	42	1532	0.0274151	0.0269058		0.9996	449.486	0.514311	448.971	1.02862	450	0.00228582	0.00388466
		0.7746	1512	21	1491	42	1533	0.0273973	0.0269058		0.9995	450.484	0.516261	449.967	1.03252	451	0.0022894	0.00392705
		0.7741	1513	21	1492	42	1534	0.0273794	0.0269058		0.9995	451.482	0.518216	450.964	1.03643	452	0.00229299	0.00392705
		0.7698	1514	21	1493	42	1535	0.0273616	0.0269058		0.9995	452.48	0.520177	451.96	1.04035	453	0.00229659	0.00392705
		0.766	1515	21	1494	42	1536	0.0273438	0.0269058		0.9995	453.478	0.522143	452.956	1.04429	454	0.00230019	0.00392705
		0.765	1516	21	1495	42	1537	0.027326	0.0269058		0.9995	454.476	0.524115	453.952	1.04823	455	0.0023038	0.00392705
		0.7606	1517	21	1496	42	1538	0.0273082	0.0269058		0.9995	455.474	0.526092	454.948	1.05218	456	0.00230742	0.00392705
		0.7601	1519	21	1498	42	1540	0.0272727	0.0269058		0.9994	456.472	0.528074	455.944	1.05615	457	0.00231105	0.00396453
		0.76	1520	21	1499	42	1541	0.027255	0.0269058		0.9993	457.47	0.530062	456.94	1.06012	458	0.00231468	0.00443901
		0.7587	1521	21	1500	42	1542	0.0272374	0.0269058		0.9993	458.468	0.532055	457.936	1.06411	459	0.00231832	0.00443901
		0.7578	1523	21	1502	42	1544	0.0272021	0.0269058		0.9993	459.466	0.534053	458.932	1.06811	460	0.00232197	0.00443901
		0.7574	1524	21	1503	42	1545	0.0271845	0.0269058		0.9993	460.464	0.536057	459.928	1.07211	461	0.00232563	0.00443901
		0.7544	1525	21	1504	42	1546	0.0271669	0.0269058		0.9993	461.462	0.538067	460.924	1.07613	462	0.00232929	0.00443901
		0.7538	1526	21	1505	42	1547	0.0271493	0.0269058		0.9993	462.46	0.540081	461.92	1.08016	463	0.00233297	0.00443901
		0.7531	1528	21	1507	42	1549	0.0271143	0.0269058		0.9993	463.458	0.542102	462.916	1.0842	464	0.00233665	0.00443901
		0.7513	1529	21	1508	42	1550	0.0270968	0.0269058		0.9993	464.456	0.544128	463.912	1.08826	465	0.00234033	0.00443901
		0.7512	1530	21	1509	42	1551	0.0270793	0.0269058		0.9993	465.454	0.546159	464.908	1.09232	466	0.00234403	0.00443901
		0.7488	1531	21	1510	42	1552	0.0270619	0.0269058		0.9993	466.452	0.548196	465.904	1.09639	467	0.00234773	0.00443901
		0.7486	1532	21	1511	42	1553	0.0270444	0.0269058		0.9993	467.45	0.550238	466.9	1.10048	468	0.00235144	0.00443901
		0.7475	1533	21	1512	42	1554	0.027027	0.0269058		0.9993	468.448	0.552286	467.895	1.10457	469	0.00235516	0.00443901
		0.7474	1534	21	1513	42	1555	0.0270096	0.0269058		0.9993	469.446	0.55434	468.891	1.10868	470	0.00235889	0.00443901
		0.7468	1535	21	1514	42	1556	0.0269923	0.0269058		0.9993	470.444	0.556399	469.887	1.1128	471	0.00236263	0.00443901
		0.7464	1536	21	1515	42	1557	0.026975	0.0269058		0.9993	471.442	0.558463	470.883	1.11693	472	0.00236637	0.00443901
		0.745	1537	21	1516	42	1558	0.0269576	0.0269058		0.9993	472.439	0.560534	471.879	1.12107	473	0.00237012	0.00443901
		0.7442	1538	21	1517	42	1559	0.0269403	0.0269058		0.9993	473.437	0.56261	472.875	1.12522	474	0.00237388	0.00443901
		0.7431	1539	21	1518	42	1560	0.0269231	0.0269058		0.9993	474.435	0.564691	473.871	1.12938	475	0.00237765	0.00443901
		0.7427	1540	21	1519	42	1561	0.0269058	0.0269058		0.9993	475.433	0.566779	474.866	1.13356	476	0.00238142	0.00443901
		0.7418	1540	22	1518	44	1562	0.028169	0.0280076		0.9993	476.431	0.568872	475.862	1.13774	477	0.00238521	0.00443901
		0.7398	1541	22	1519	44	1563	0.028151	0.0280076		0.9993	477.429	0.57097	476.858	1.14194	478	0.002389	0.00443901
		0.7346	1542	22	1520	44	1564	0.028133	0.0280076		0.9993	478.427	0.573075	477.854	1.14615	479	0.0023928	0.00443901
		0.7333	1543	22	1521	44	1565	0.028115	0.0280076		0.9993	479.425	0.575185	478.85	1.15037	480	0.0023966	0.00443901
		0.7328	1544	22	1522	44	1566	0.0280971	0.0280076		0.9993	480.423	0.577301	479.845	1.1546	481	0.00240042	0.00443901
		0.7327	1545	22	1523	44	1567	0.0280791	0.0280076		0.9993	481.421	0.579423	480.841	1.15885	482	0.00240424	0.00443901
		0.7302	1546	22	1524	44	1568	0.0280612	0.0280076		0.9993	482.418	0.58155	481.837	1.1631	483	0.00240807	0.00443901
		0.7296	1548	22	1526	44	1570	0.0280255	0.0280076		0.9993	483.416	0.583683	482.833	1.16737	484	0.00241191	0.00443901
		0.7253	1549	22	1527	44	1571	0.0280076	0.0280076		0.9993	484.414	0.585822	483.828	1.17164	485	0.00241576	0.00443901
		0.7252	1549	23	1526	46	1572	0.0292621	0.0292435		0.9993	485.412	0.587967	484.824	1.17593	486	0.00241962	0.00443901
		0.7239	1550	23	1527	46	1573	0.0292435	0.0292435		0.9993	486.41	0.590118	485.82	1.18024	487	0.00242348	0.00443901
		0.7185	1551	24	1527	48	1575	0.0304762	0.0304375		0.9993	487.408	0.592275	486.815	1.18455	488	0.00242736	0.00443901
		0.7158	1553	24	1529	48	1577	0.0304375	0.0304375		0.9993	488.406	0.594438	487.811	1.18888	489	0.00243124	0.00443901
		0.7154	1553	25	1528	50	1578	0.0316857	0.0316656		0.9993	489.403	0.596606	488.807	1.19321	490	0.00243513	0.00443901
		0.7141	1554	25	1529	50	1579	0.0316656	0.0316656		0.9993	490.401	0.598781	489.802	1.19756	491	0.00243902	0.00443901
		0.713	1554	26	1528	52	1580	0.0329114	0.0325		0.9993	491.399	0.600961	490.798	1.20192	492	0.00244293	0.00443901
		0.7075	1555	26	1529	52	1581	0.0328906	0.0325		0.9993	492.397	0.603147	491.794	1.20629	493	0.00244685	0.00443901
		0.7047	1557	26	1531	52	1583	0.032849	0.0325		0.9993	493.395	0.60534	492.789	1.21068	494	0.00245077	0.00443901
		0.7038	1558	26	1532	52	1584	0.0328283	0.0325		0.9993	494.392	0.607538	493.785	1.21508	495	0.0024547	0.00443901
		0.7027	1559	26	1533	52	1585	0.0328076	0.0325		0.9993	495.39	0.609742	494.781	1.21948	496	0.00245864	0.00443901
		0.7024	1560	26	1534	52	1586	0.0327869	0.0325		0.9993	496.388	0.611953	495.776	1.22391	497	0.00246259	0.00443901
		0.7019	1561	26	1535	52	1587	0.0327662	0.0325		0.9993	497.386	0.614169	496.772	1.22834	498	0.00246654	0.00443901
		0.7011	1563	26	1537	52	1589	0.032725	0.0325		0.9993	498.384	0.616392	497.767	1.23278	499	0.00247051	0.00443901
		0.701	1564	26	1538	52	1590	0.0327044	0.0325		0.9993	499.381	0.61862	498.763	1.23724	500	0.00247448	0.00443901
		0.7002	1565	26	1539	52	1591	0.0326838	0.0325		0.9993	500.379	0.620855	499.758	1.24171	501	0.00247846	0.00443901
		0.6988	1566	26	1540	52	1592	0.0326633	0.0325		0.9993	501.377	0.623096	500.754	1.24619	502	0.00248245	0.00443901
		0.6975	1570	26	1544	52	1596	0.0325815	0.0325		0.9993	502.375	0.625343	501.749	1.25069	503	0.00248645	0.00443901
		0.6963	1572	26	1546	52	1598	0.0325407	0.0325		0.9993	503.372	0.627596	502.745	1.25519	504	0.00249046	0.00443901
		0.6935	1573	26	1547	52	1599	0.0325203	0.0325		0.9993	504.37	0.629856	503.74	1.25971	505	0.00249448	0.00443901
		0.6903	1574	26	1548	52	1600	0.0325	0.0325		0.9993	505.368	0.632121	504.736	1.26424	506	0.0024985	0.00443901
		0.6897	1574	27	1547	54	1601	0.0337289	0.0334365		0.9993	506.366	0.634393	505.731	1.26879	507	0.00250254	0.00443901
		0.6894	1577	27	1550	54	1604	0.0336658	0.0334365		0.9993	507.363	0.636671	506.727	1.27334	508	0.00250658	0.00443901
		0.6887	1578	27	1551	54	1605	0.0336449	0.0334365		0.9993	508.361	0.638956	507.722	1.27791	509	0.00251063	0.00443901
		0.6871	1579	27	1552	54	1606	0.0336239	0.0334365		0.9993	509.359	0.641246	508.718	1.28249	510	0.00251469	0.00443901
		0.6866	1580	27	1553	54	1607	0.033603	0.0334365		0.9993	510.356	0.643543	509.713	1.28709	511	0.00251876	0.00443901
		0.6849	1581	27	1554	54	1608	0.0335821	0.0334365		0.9993	511.354	0.645846	510.708	1.29169	512	0.00252284	0.00443901
		0.6848	1582	27	1555	54	1609	0.0335612	0.0334365		0.9993	512.352	0.648156	511.704	1.29631	513	0.00252692	0.00443901
		0.6791	1583	27	1556	54	1610	0.0335404	0.0334365		0.9993	513.35	0.650472	512.699	1.30094	514	0.00253102	0.00443901
		0.6777	1584	27	1557	54	1611	0.0335196	0.0334365		0.9993	514.347	0.652794	513.694	1.30559	515	0.00253512	0.00443901
		0.677	1585	27	1558	54	1612	0.0334988	0.0334365		0.9993	515.345	0.655123	514.69	1.31025	516	0.00253924	0.00443901
		0.6755	1586	27	1559	54	1613	0.033478	0.0334365		0.9993	516.343	0.657458	515.685	1.31492	517	0.00254336	0.00443901
		0.6749	1587	27	1560	54	1614	0.0334572	0.0334365		0.9993	517.34	0.6598	516.68	1.3196	518	0.00254749	0.00443901
		0.6748	1588	27	1561	54	1615	0.0334365	0.0334365		0.9993	518.338	0.662148	517.676	1.3243	519	0.00255163	0.00443901
		0.6733	1588	28	1560	56	1616	0.0346535	0.0344192		0.9993	519.335	0.664503	518.671	1.32901	520	0.00255578	0.00443901
		0.6717	1589	28	1561	56	1617	0.034632	0.0344192		0.9993	520.333	0.666864	519.666	1.33373	521	0.00255994	0.00443901
		0.6711	1590	28	1562	56	1618	0.0346106	0.0344192		0.9993	521.331	0.669231	520.662	1.33846	522	0.0025641	0.00443901
		0.6691	1591	28	1563	56	1619	0.0345893	0.0344192		0.9993	522.328	0.671606	521.657	1.34321	523	0.00256828	0.00443901
		0.6682	1593	28	1565	56	1621	0.0345466	0.0344192		0.9993	523.326	0.673986	522.652	1.34797	524	0.00257247	0.00443901
		0.668	1594	28	1566	56	1622	0.0345253	0.0344192		0.9993	524.324	0.676374	523.647	1.35275	525	0.00257666	0.00443901
		0.6674	1595	28	1567	56	1623	0.034504	0.0344192		0.9993	525.321	0.678768	524.642	1.35754	526	0.00258087	0.00443901
		0.6645	1596	28	1568	56	1624	0.0344828	0.0344192		0.9993	526.319	0.681168	525.638	1.36234	527	0.00258508	0.00443901
		0.6639	1598	28	1570	56	1626	0.0344403	0.0344192		0.9993	527.316	0.683575	526.633	1.36715	528	0.0025893	0.00443901
		0.6627	1599	28	1571	56	1627	0.0344192	0.0344192		0.9993	528.314	0.685989	527.628	1.37198	529	0.00259353	0.00443901
		0.6615	1599	29	1570	58	1628	0.0356265	0.035474		0.9993	529.312	0.68841	528.623	1.37682	530	0.00259777	0.00443901
		0.6585	1600	29	1571	58	1629	0.0356047	0.035474		0.9993	530.309	0.690837	529.618	1.38167	531	0.00260202	0.00443901
		0.658	1603	29	1574	58	1632	0.0355392	0.035474		0.9993	531.307	0.693271	530.613	1.38654	532	0.00260628	0.00443901
		0.6549	1604	29	1575	58	1633	0.0355175	0.035474		0.9993	532.304	0.695712	531.609	1.39142	533	0.00261055	0.00443901
		0.6541	1605	29	1576	58	1634	0.0354957	0.035474		0.9993	533.302	0.698159	532.604	1.39632	534	0.00261483	0.00443901
		0.6531	1606	29	1577	58	1635	0.035474	0.035474		0.9993	534.299	0.700614	533.599	1.40123	535	0.00261912	0.00443901
		0.6514	1606	30	1576	60	1636	0.0366748	0.036452		0.9993	535.297	0.703075	534.594	1.40615	536	0.00262341	0.00443901
		0.6506	1607	30	1577	60	1637	0.0366524	0.036452		0.9993	536.294	0.705543	535.589	1.41109	537	0.00262772	0.00443901
		0.6482	1608	30	1578	60	1638	0.03663	0.036452		0.9993	537.292	0.708018	536.584	1.41604	538	0.00263204	0.00443901
		0.6458	1609	30	1579	60	1639	0.0366077	0.036452		0.9993	538.29	0.7105	537.579	1.421	539	0.00263636	0.00443901
		0.6454	1610	30	1580	60	1640	0.0365854	0.036452		0.9992	539.287	0.712989	538.574	1.42598	540	0.0026407	0.00497745
		0.6453	1611	30	1581	60	1641	0.0365631	0.036452		0.9991	540.285	0.715484	539.569	1.43097	541	0.00264504	0.0050262
		0.6445	1612	30	1582	60	1642	0.0365408	0.036452		0.9991	541.282	0.717987	540.564	1.43597	542	0.0026494	0.0050262
		0.6405	1613	30	1583	60	1643	0.0365186	0.036452		0.9991	542.28	0.720496	541.559	1.44099	543	0.00265376	0.0050262
		0.6372	1614	30	1584	60	1644	0.0364964	0.036452		0.9991	543.277	0.723013	542.554	1.44603	544	0.00265814	0.0050262
		0.6371	1615	30	1585	60	1645	0.0364742	0.036452		0.9991	544.274	0.725537	543.549	1.45107	545	0.00266252	0.0050262
		0.6366	1616	30	1586	60	1646	0.036452	0.036452		0.9991	545.272	0.728067	544.544	1.45613	546	0.00266691	0.0050262
		0.6344	1617	31	1586	62	1648	0.0376214	0.0374396		0.999	546.269	0.730605	545.539	1.46121	547	0.00267132	0.00524896
		0.6339	1618	31	1587	62	1649	0.0375985	0.0374396		0.999	547.267	0.73315	546.534	1.4663	548	0.00267573	0.00524896
		0.6335	1619	31	1588	62	1650	0.0375758	0.0374396		0.999	548.264	0.735702	547.529	1.4714	549	0.00268015	0.00524896
		0.6296	1620	31	1589	62	1651	0.037553	0.0374396		0.999	549.262	0.738261	548.523	1.47652	550	0.00268459	0.00524896
		0.629	1622	31	1591	62	1653	0.0375076	0.0374396		0.999	550.259	0.740827	549.518	1.48165	551	0.00268903	0.00524896
		0.6288	1623	31	1592	62	1654	0.0374849	0.0374396		0.999	551.257	0.743401	550.513	1.4868	552	0.00269348	0.00524896
		0.6284	1624	31	1593	62	1655	0.0374622	0.0374396		0.999	552.254	0.745982	551.508	1.49196	553	0.00269794	0.00524896
		0.6254	1625	31	1594	62	1656	0.0374396	0.0374396		0.999	553.251	0.748569	552.503	1.49714	554	0.00270242	0.00524896
		0.6252	1625	32	1593	64	1657	0.038624	0.038624		0.999	554.249	0.751165	553.498	1.50233	555	0.0027069	0.00524896
		0.6225	1625	33	1592	66	1658	0.039807	0.0395683		0.999	555.246	0.753767	554.492	1.50753	556	0.00271139	0.00524896
		0.6193	1626	33	1593	66	1659	0.039783	0.0395683		0.999	556.244	0.756377	555.487	1.51275	557	0.0027159	0.00524896
		0.6191	1627	33	1594	66	1660	0.039759	0.0395683		0.999	557.241	0.758994	556.482	1.51799	558	0.00272041	0.00524896
		0.6189	1628	33	1595	66	1661	0.0397351	0.0395683		0.999	558.238	0.761619	557.477	1.52324	559	0.00272493	0.00524896
		0.6187	1629	33	1596	66	1662	0.0397112	0.0395683		0.999	559.236	0.76425	558.471	1.5285	560	0.00272947	0.00524896
		0.6145	1630	33	1597	66	1663	0.0396873	0.0395683		0.999	560.233	0.76689	559.466	1.53378	561	0.00273401	0.00524896
		0.6131	1631	33	1598	66	1664	0.0396635	0.0395683		0.999	561.23	0.769536	560.461	1.53907	562	0.00273856	0.00524896
		0.6121	1634	33	1601	66	1667	0.0395921	0.0395683		0.999	562.228	0.772191	561.456	1.54438	563	0.00274313	0.00524896
		0.6067	1635	33	1602	66	1668	0.0395683	0.0395683		0.999	563.225	0.774852	562.45	1.5497	564	0.0027477	0.00524896
		0.6047	1635	34	1601	68	1669	0.040743	0.0405003		0.999	564.222	0.777521	563.445	1.55504	565	0.00275229	0.00524896
		0.6035	1636	34	1602	68	1670	0.0407186	0.0405003		0.999	565.22	0.780198	564.44	1.5604	566	0.00275688	0.00524896
		0.6016	1637	34	1603	68	1671	0.0406942	0.0405003		0.999	566.217	0.782882	565.434	1.56576	567	0.00276149	0.00524896
		0.6004	1638	34	1604	68	1672	0.0406699	0.0405003		0.999	567.214	0.785574	566.429	1.57115	568	0.00276611	0.00524896
		0.6003	1639	34	1605	68	1673	0.0406455	0.0405003		0.999	568.212	0.788274	567.423	1.57655	569	0.00277073	0.00524896
		0.5966	1640	34	1606	68	1674	0.0406213	0.0405003		0.999	569.209	0.790981	568.418	1.58196	570	0.00277537	0.00524896
		0.596	1641	34	1607	68	1675	0.040597	0.0405003		0.999	570.206	0.793695	569.413	1.58739	571	0.00278002	0.00524896
		0.595	1642	34	1608	68	1676	0.0405728	0.0405003		0.9989	571.204	0.796418	570.407	1.59284	572	0.00278468	0.00549904
		0.5943	1643	34	1609	68	1677	0.0405486	0.0405003		0.9989	572.201	0.799148	571.402	1.5983	573	0.00278935	0.00549904
		0.5942	1644	34	1610	68	1678	0.0405244	0.0405003		0.9989	573.198	0.801886	572.396	1.60377	574	0.00279403	0.00549904
		0.5928	1645	34	1611	68	1679	0.0405003	0.0405003		0.9989	574.195	0.804631	573.391	1.60926	575	0.00279872	0.00549904
		0.5879	1645	35	1610	70	1680	0.0416667	0.0411765		0.9989	575.193	0.807385	574.385	1.61477	576	0.00280342	0.00549904
		0.5865	1646	35	1611	70	1681	0.0416419	0.0411765		0.9989	576.19	0.810146	575.38	1.62029	577	0.00280813	0.00549904
		0.584	1653	35	1618	70	1688	0.0414692	0.0411765		0.9989	577.187	0.812915	576.374	1.62583	578	0.00281286	0.00549904
		0.5832	1654	35	1619	70	1689	0.0414446	0.0411765		0.9989	578.184	0.815692	577.369	1.63138	579	0.00281759	0.00549904
		0.582	1655	35	1620	70	1690	0.0414201	0.0411765		0.9988	579.182	0.818477	578.363	1.63695	580	0.00282233	0.00560143
		0.5817	1656	35	1621	70	1691	0.0413956	0.0411765		0.9988	580.179	0.82127	579.357	1.64254	581	0.00282709	0.00560143
		0.5788	1657	35	1622	70	1692	0.0413712	0.0411765		0.9988	581.176	0.82407	580.352	1.64814	582	0.00283186	0.00560143
		0.5755	1658	35	1623	70	1693	0.0413467	0.0411765		0.9988	582.173	0.826879	581.346	1.65376	583	0.00283663	0.00560143
		0.5754	1659	35	1624	70	1694	0.0413223	0.0411765		0.9988	583.17	0.829696	582.341	1.65939	584	0.00284142	0.00560143
		0.5724	1660	35	1625	70	1695	0.0412979	0.0411765		0.9987	584.167	0.832521	583.335	1.66504	585	0.00284622	0.00566558
		0.5701	1662	35	1627	70	1697	0.0412493	0.0411765		0.9987	585.165	0.835353	584.329	1.67071	586	0.00285104	0.00566558
		0.5698	1663	35	1628	70	1698	0.041225	0.0411765		0.9987	586.162	0.838194	585.324	1.67639	587	0.00285586	0.00566558
		0.5691	1664	35	1629	70	1699	0.0412007	0.0411765		0.9986	587.159	0.841043	586.318	1.68209	588	0.00286069	0.00571426
		0.5686	1665	35	1630	70	1700	0.0411765	0.0411765		0.9986	588.156	0.8439	587.312	1.6878	589	0.00286554	0.00571426
		0.5635	1665	36	1629	72	1701	0.042328	0.0418118		0.9986	589.153	0.846766	588.306	1.69353	590	0.00287039	0.00571426
		0.5623	1666	36	1630	72	1702	0.0423032	0.0418118		0.9985	590.15	0.849639	589.301	1.69928	591	0.00287526	0.00581315
		0.561	1667	36	1631	72	1703	0.0422783	0.0418118		0.9985	591.147	0.852521	590.295	1.70504	592	0.00288014	0.00581315
		0.5572	1668	36	1632	72	1704	0.0422535	0.0418118		0.9985	592.145	0.855411	591.289	1.71082	593	0.00288503	0.00581315
		0.5565	1669	36	1633	72	1705	0.0422287	0.0418118		0.9985	593.142	0.858309	592.283	1.71662	594	0.00288993	0.00581315
		0.5564	1670	36	1634	72	1706	0.042204	0.0418118		0.9985	594.139	0.861216	593.278	1.72243	595	0.00289484	0.00581315
		0.5563	1672	36	1636	72	1708	0.0421546	0.0418118		0.9985	595.136	0.864131	594.272	1.72826	596	0.00289977	0.00581315
		0.5553	1674	36	1638	72	1710	0.0421053	0.0418118		0.9985	596.133	0.867054	595.266	1.73411	597	0.0029047	0.00581315
		0.5548	1675	36	1639	72	1711	0.0420807	0.0418118		0.9985	597.13	0.869986	596.26	1.73997	598	0.00290965	0.00581315
		0.5545	1676	36	1640	72	1712	0.0420561	0.0418118		0.9985	598.127	0.872926	597.254	1.74585	599	0.00291461	0.00581315
		0.5529	1677	36	1641	72	1713	0.0420315	0.0418118		0.9984	599.124	0.875874	598.248	1.75175	600	0.00291958	0.00593112
		0.5526	1679	36	1643	72	1715	0.0419825	0.0418118		0.9984	600.121	0.878831	599.242	1.75766	601	0.00292456	0.00593112
		0.5509	1680	36	1644	72	1716	0.041958	0.0418118		0.9984	601.118	0.881797	600.236	1.76359	602	0.00292956	0.00593112
		0.5501	1681	36	1645	72	1717	0.0419336	0.0418118		0.9984	602.115	0.884771	601.23	1.76954	603	0.00293456	0.00593112
		0.5486	1682	36	1646	72	1718	0.0419092	0.0418118		0.9984	603.112	0.887754	602.224	1.77551	604	0.00293958	0.00593112
		0.5479	1683	36	1647	72	1719	0.0418848	0.0418118		0.9983	604.109	0.890745	603.219	1.78149	605	0.00294461	0.00605199
		0.5474	1684	36	1648	72	1720	0.0418605	0.0418118		0.9983	605.106	0.893745	604.213	1.78749	606	0.00294965	0.00605199
		0.5463	1685	36	1649	72	1721	0.0418361	0.0418118		0.9983	606.103	0.896753	605.206	1.79351	607	0.00295471	0.00605199
		0.5407	1686	36	1650	72	1722	0.0418118	0.0418118		0.9983	607.1	0.899771	606.2	1.79954	608	0.00295977	0.00605199
		0.5392	1686	37	1649	74	1723	0.0429483	0.0429234		0.9983	608.097	0.902797	607.194	1.80559	609	0.00296485	0.00605199
		0.539	1687	37	1650	74	1724	0.0429234	0.0429234		0.9983	609.094	0.905831	608.188	1.81166	610	0.00296994	0.00605199
		0.5375	1687	38	1649	76	1725	0.044058	0.0440324		0.9983	610.091	0.908875	609.182	1.81775	611	0.00297504	0.00605199
		0.5365	1688	38	1650	76	1726	0.0440324	0.0440324		0.9983	611.088	0.911927	610.176	1.82385	612	0.00298015	0.00605199
		0.5361	1689	39	1650	78	1728	0.0451389	0.0451128		0.9983	612.085	0.914988	611.17	1.82998	613	0.00298528	0.00605199
		0.5357	1690	39	1651	78	1729	0.0451128	0.0451128		0.9982	613.082	0.918059	612.164	1.83612	614	0.00299042	0.00614014
		0.534	1690	40	1650	80	1730	0.0462428	0.0461361		0.9981	614.079	0.921138	613.158	1.84228	615	0.00299557	0.00661457
		0.5337	1691	40	1651	80	1731	0.0462161	0.0461361		0.9981	615.076	0.924225	614.152	1.84845	616	0.00300073	0.00661457
		0.5312	1692	40	1652	80	1732	0.0461894	0.0461361		0.9981	616.073	0.927322	615.145	1.85464	617	0.00300591	0.00661457
		0.5287	1693	40	1653	80	1733	0.0461627	0.0461361		0.9981	617.07	0.930428	616.139	1.86086	618	0.00301109	0.00661457
		0.5275	1694	40	1654	80	1734	0.0461361	0.0461361		0.9981	618.066	0.933543	617.133	1.86709	619	0.00301629	0.00661457
		0.5274	1694	41	1653	82	1735	0.0472622	0.0472622		0.9981	619.063	0.936667	618.127	1.87333	620	0.00302151	0.00661457
		0.5271	1694	42	1652	84	1736	0.0483871	0.0482481		0.9981	620.06	0.9398	619.12	1.8796	621	0.00302673	0.00661457
		0.5267	1696	42	1654	84	1738	0.0483314	0.0482481		0.9981	621.057	0.942942	620.114	1.88588	622	0.00303197	0.00661457
		0.5252	1697	42	1655	84	1739	0.0483036	0.0482481		0.9981	622.054	0.946094	621.108	1.89219	623	0.00303722	0.00661457
		0.5249	1698	42	1656	84	1740	0.0482759	0.0482481		0.9981	623.051	0.949254	622.101	1.89851	624	0.00304248	0.00661457
		0.5224	1699	42	1657	84	1741	0.0482481	0.0482481		0.9981	624.048	0.952424	623.095	1.90485	625	0.00304776	0.00661457
		0.5195	1699	43	1656	86	1742	0.0493685	0.0489471		0.9981	625.044	0.955603	624.089	1.91121	626	0.00305305	0.00661457
		0.5151	1700	43	1657	86	1743	0.0493402	0.0489471		0.9981	626.041	0.958792	625.082	1.91758	627	0.00305835	0.00661457
		0.5124	1701	43	1658	86	1744	0.0493119	0.0489471		0.9981	627.038	0.961989	626.076	1.92398	628	0.00306366	0.00661457
		0.512	1702	43	1659	86	1745	0.0492837	0.0489471		0.9981	628.035	0.965196	627.07	1.93039	629	0.00306899	0.00661457
		0.5108	1703	43	1660	86	1746	0.0492554	0.0489471		0.9981	629.032	0.968413	628.063	1.93683	630	0.00307433	0.00661457
		0.5104	1704	43	1661	86	1747	0.0492272	0.0489471		0.9981	630.028	0.971638	629.057	1.94328	631	0.00307968	0.00661457
		0.508	1705	43	1662	86	1748	0.0491991	0.0489471		0.9981	631.025	0.974874	630.05	1.94975	632	0.00308504	0.00661457
		0.507	1706	43	1663	86	1749	0.049171	0.0489471		0.9981	632.022	0.978119	631.044	1.95624	633	0.00309042	0.00661457
		0.5065	1707	43	1664	86	1750	0.0491429	0.0489471		0.9981	633.019	0.981373	632.037	1.96275	634	0.00309581	0.00661457
		0.5061	1708	43	1665	86	1751	0.0491148	0.0489471		0.9981	634.015	0.984637	633.031	1.96927	635	0.00310122	0.00661457
		0.5052	1709	43	1666	86	1752	0.0490868	0.0489471		0.9981	635.012	0.98791	634.024	1.97582	636	0.00310664	0.00661457
		0.5046	1710	43	1667	86	1753	0.0490588	0.0489471		0.9981	636.009	0.991193	635.018	1.98239	637	0.00311207	0.00661457
		0.5036	1711	43	1668	86	1754	0.0490308	0.0489471		0.9981	637.006	0.994486	636.011	1.98897	638	0.00311751	0.00661457
		0.5024	1712	43	1669	86	1755	0.0490028	0.0489471		0.9981	638.002	0.997788	637.004	1.99558	639	0.00312297	0.00661457
		0.5015	1713	43	1670	86	1756	0.0489749	0.0489471		0.9981	638.999	1.0011	637.998	2.0022	640	0.00312844	0.00661457
		0.4999	1714	43	1671	86	1757	0.0489471	0.0489471		0.9981	639.996	1.00442	638.991	2.00884	641	0.00313392	0.00661457
		0.4982	1714	44	1670	88	1758	0.0500569	0.0498301		0.9981	640.992	1.00775	639.984	2.01551	642	0.00313942	0.00661457
		0.4981	1715	44	1671	88	1759	0.0500284	0.0498301		0.9981	641.989	1.0111	640.978	2.02219	643	0.00314493	0.00661457
		0.497	1716	44	1672	88	1760	0.05	0.0498301		0.9981	642.986	1.01445	641.971	2.02889	644	0.00315046	0.00661457
		0.4954	1720	44	1676	88	1764	0.0498866	0.0498301		0.9981	643.982	1.01781	642.964	2.03562	645	0.003156	0.00661457
		0.495	1721	44	1677	88	1765	0.0498584	0.0498301		0.9981	644.979	1.02118	643.958	2.04236	646	0.00316155	0.00661457
		0.4949	1722	44	1678	88	1766	0.0498301	0.0498301		0.9981	645.975	1.02456	644.951	2.04912	647	0.00316711	0.00661457
		0.4946	1722	45	1677	90	1767	0.0509338	0.0509338		0.9981	646.972	1.02795	645.944	2.0559	648	0.00317269	0.00661457
		0.4936	1722	46	1676	92	1768	0.0520362	0.0514829		0.9981	647.969	1.03135	646.937	2.06271	649	0.00317828	0.00661457
		0.493	1723	46	1677	92	1769	0.0520068	0.0514829		0.9981	648.965	1.03476	647.93	2.06953	650	0.00318389	0.00661457
		0.4915	1725	46	1679	92	1771	0.0519481	0.0514829		0.9981	649.962	1.03819	648.924	2.07637	651	0.00318951	0.00661457
		0.4899	1726	46	1680	92	1772	0.0519187	0.0514829		0.9981	650.958	1.04162	649.917	2.08324	652	0.00319515	0.00661457
		0.4894	1727	46	1681	92	1773	0.0518895	0.0514829		0.9981	651.955	1.04506	650.91	2.09012	653	0.0032008	0.00661457
		0.4893	1729	46	1683	92	1775	0.051831	0.0514829		0.9981	652.951	1.04851	651.903	2.09702	654	0.00320646	0.00661457
		0.4886	1734	46	1688	92	1780	0.0516854	0.0514829		0.9981	653.948	1.05197	652.896	2.10395	655	0.00321213	0.00661457
		0.4882	1735	46	1689	92	1781	0.0516564	0.0514829		0.9981	654.945	1.05545	653.889	2.11089	656	0.00321783	0.00661457
		0.4875	1736	46	1690	92	1782	0.0516274	0.0514829		0.9981	655.941	1.05893	654.882	2.11786	657	0.00322353	0.00661457
		0.4873	1737	46	1691	92	1783	0.0515984	0.0514829		0.9981	656.938	1.06242	655.875	2.12485	658	0.00322925	0.00661457
		0.4869	1738	46	1692	92	1784	0.0515695	0.0514829		0.9981	657.934	1.06593	656.868	2.13185	659	0.00323498	0.00661457
		0.4846	1739	46	1693	92	1785	0.0515406	0.0514829		0.9981	658.931	1.06944	657.861	2.13888	660	0.00324073	0.00661457
		0.4844	1740	46	1694	92	1786	0.0515118	0.0514829		0.9981	659.927	1.07297	658.854	2.14593	661	0.00324649	0.00661457
		0.4823	1741	46	1695	92	1787	0.0514829	0.0514829		0.9981	660.923	1.0765	659.847	2.153	662	0.00325227	0.00661457
		0.4813	1741	47	1694	94	1788	0.0525727	0.0525433		0.9981	661.92	1.08005	660.84	2.16009	663	0.00325806	0.00661457
		0.4809	1742	47	1695	94	1789	0.0525433	0.0525433		0.9981	662.916	1.0836	661.833	2.16721	664	0.00326386	0.00661457
		0.4806	1742	48	1694	96	1790	0.0536313	0.0535416		0.998	663.913	1.08717	662.826	2.17434	665	0.00326968	0.00766828
		0.4804	1743	48	1695	96	1791	0.0536013	0.0535416		0.998	664.909	1.09075	663.819	2.18149	666	0.00327552	0.00766828
		0.4752	1744	48	1696	96	1792	0.0535714	0.0535416		0.998	665.906	1.09434	664.811	2.18867	667	0.00328137	0.00766828
		0.4738	1745	48	1697	96	1793	0.0535416	0.0535416		0.998	666.902	1.09793	665.804	2.19587	668	0.00328723	0.00766828
		0.4688	1745	49	1696	98	1794	0.0546265	0.0545961		0.998	667.898	1.10154	666.797	2.20309	669	0.00329311	0.00766828
		0.4655	1746	49	1697	98	1795	0.0545961	0.0545961		0.998	668.895	1.10517	667.79	2.21033	670	0.003299	0.00766828
		0.463	1747	50	1697	100	1797	0.0556483	0.0547945		0.998	669.891	1.1088	668.782	2.21759	671	0.00330491	0.00766828
		0.4618	1748	50	1698	100	1798	0.0556174	0.0547945		0.998	670.888	1.11244	669.775	2.22488	672	0.00331083	0.00766828
		0.4597	1749	50	1699	100	1799	0.0555864	0.0547945		0.998	671.884	1.11609	670.768	2.23219	673	0.00331677	0.00766828
		0.4585	1750	50	1700	100	1800	0.0555556	0.0547945		0.998	672.88	1.11976	671.76	2.23951	674	0.00332272	0.00766828
		0.4575	1751	50	1701	100	1801	0.0555247	0.0547945		0.998	673.877	1.12343	672.753	2.24687	675	0.00332869	0.00766828
		0.457	1752	50	1702	100	1802	0.0554939	0.0547945		0.998	674.873	1.12712	673.746	2.25424	676	0.00333467	0.00766828
		0.4559	1753	50	1703	100	1803	0.0554631	0.0547945		0.998	675.869	1.13082	674.738	2.26163	677	0.00334067	0.00766828
		0.4556	1754	50	1704	100	1804	0.0554324	0.0547945		0.998	676.865	1.13453	675.731	2.26905	678	0.00334668	0.00766828
		0.4515	1755	50	1705	100	1805	0.0554017	0.0547945		0.998	677.862	1.13825	676.724	2.27649	679	0.00335271	0.00766828
		0.451	1756	50	1706	100	1806	0.055371	0.0547945		0.998	678.858	1.14198	677.716	2.28395	680	0.00335876	0.00766828
		0.449	1757	50	1707	100	1807	0.0553403	0.0547945		0.998	679.854	1.14572	678.709	2.29144	681	0.00336482	0.00766828
		0.4489	1758	50	1708	100	1808	0.0553097	0.0547945		0.998	680.851	1.14947	679.701	2.29895	682	0.00337089	0.00766828
		0.4487	1759	50	1709	100	1809	0.0552792	0.0547945		0.998	681.847	1.15324	680.694	2.30648	683	0.00337698	0.00766828
		0.445	1760	50	1710	100	1810	0.0552486	0.0547945		0.998	682.843	1.15702	681.686	2.31403	684	0.00338309	0.00766828
		0.4448	1761	50	1711	100	1811	0.0552181	0.0547945		0.998	683.839	1.1608	682.678	2.32161	685	0.00338921	0.00766828
		0.4442	1762	50	1712	100	1812	0.0551876	0.0547945		0.998	684.835	1.1646	683.671	2.32921	686	0.00339534	0.00766828
		0.4421	1763	50	1713	100	1813	0.0551572	0.0547945		0.998	685.832	1.16841	684.663	2.33683	687	0.0034015	0.00766828
		0.4404	1764	50	1714	100	1814	0.0551268	0.0547945		0.998	686.828	1.17224	685.656	2.34447	688	0.00340766	0.00766828
		0.4402	1765	50	1715	100	1815	0.0550964	0.0547945		0.998	687.824	1.17607	686.648	2.35214	689	0.00341385	0.00766828
		0.4395	1766	50	1716	100	1816	0.0550661	0.0547945		0.998	688.82	1.17992	687.64	2.35983	690	0.00342005	0.00766828
		0.4394	1769	50	1719	100	1819	0.0549753	0.0547945		0.998	689.816	1.18377	688.632	2.36755	691	0.00342626	0.00766828
		0.4393	1770	50	1720	100	1820	0.0549451	0.0547945		0.998	690.812	1.18764	689.625	2.37529	692	0.00343249	0.00766828
		0.4391	1771	50	1721	100	1821	0.0549149	0.0547945		0.998	691.808	1.19152	690.617	2.38305	693	0.00343874	0.00766828
		0.4378	1772	50	1722	100	1822	0.0548847	0.0547945		0.998	692.805	1.19542	691.609	2.39083	694	0.003445	0.00766828
		0.4356	1773	50	1723	100	1823	0.0548546	0.0547945		0.998	693.801	1.19932	692.601	2.39864	695	0.00345128	0.00766828
		0.4355	1774	50	1724	100	1824	0.0548246	0.0547945		0.998	694.797	1.20324	693.594	2.40648	696	0.00345758	0.00766828
		0.4351	1775	50	1725	100	1825	0.0547945	0.0547945		0.998	695.793	1.20717	694.586	2.41433	697	0.00346389	0.00766828
		0.4348	1775	51	1724	102	1826	0.0558598	0.0557377		0.998	696.789	1.21111	695.578	2.42221	698	0.00347022	0.00766828
		0.4347	1776	51	1725	102	1827	0.0558292	0.0557377		0.998	697.785	1.21506	696.57	2.43012	699	0.00347656	0.00766828
		0.4345	1777	51	1726	102	1828	0.0557987	0.0557377		0.998	698.781	1.21902	697.562	2.43805	700	0.00348292	0.00766828
		0.4338	1778	51	1727	102	1829	0.0557682	0.0557377		0.998	699.777	1.223	698.554	2.446	701	0.0034893	0.00766828
		0.4332	1779	51	1728	102	1830	0.0557377	0.0557377		0.998	700.773	1.22699	699.546	2.45398	702	0.0034957	0.00766828
		0.4322	1779	52	1727	104	1831	0.0567996	0.0566757		0.998	701.769	1.23099	700.538	2.46198	703	0.00350211	0.00766828
		0.432	1780	52	1728	104	1832	0.0567686	0.0566757		0.998	702.765	1.235	701.53	2.47001	704	0.00350853	0.00766828
		0.4315	1781	52	1729	104	1833	0.0567376	0.0566757		0.998	703.761	1.23903	702.522	2.47806	705	0.00351498	0.00766828
		0.4299	1782	52	1730	104	1834	0.0567067	0.0566757		0.998	704.757	1.24307	703.514	2.48613	706	0.00352144	0.00766828
		0.4294	1783	52	1731	104	1835	0.0566757	0.0566757		0.998	705.753	1.24712	704.506	2.49424	707	0.00352791	0.00766828
		0.4275	1783	53	1730	106	1836	0.0577342	0.0576714		0.998	706.749	1.25118	705.498	2.50236	708	0.00353441	0.00766828
		0.4262	1784	53	1731	106	1837	0.0577028	0.0576714		0.998	707.745	1.25526	706.489	2.51051	709	0.00354092	0.00766828
		0.4256	1785	53	1732	106	1838	0.0576714	0.0576714		0.998	708.741	1.25934	707.481	2.51869	710	0.00354745	0.00766828
		0.425	1785	54	1731	108	1839	0.0587276	0.0585683		0.998	709.737	1.26344	708.473	2.52689	711	0.00355399	0.00766828
		0.4223	1786	54	1732	108	1840	0.0586957	0.0585683		0.998	710.732	1.26756	709.465	2.53511	712	0.00356055	0.00766828
		0.4197	1788	54	1734	108	1842	0.0586319	0.0585683		0.998	711.728	1.27168	710.457	2.54337	713	0.00356713	0.00766828
		0.4194	1789	54	1735	108	1843	0.0586001	0.0585683		0.9979	712.724	1.27582	711.448	2.55164	714	0.00357373	0.0082768
		0.4159	1790	54	1736	108	1844	0.0585683	0.0585683		0.9977	713.72	1.27997	712.44	2.55994	715	0.00358034	0.00845741
		0.4158	1790	55	1735	110	1845	0.0596206	0.0594273		0.9977	714.716	1.28414	713.432	2.56827	716	0.00358697	0.00845741
		0.4156	1791	55	1736	110	1846	0.0595883	0.0594273		0.9977	715.712	1.28831	714.423	2.57663	717	0.00359362	0.00845741
		0.4142	1796	55	1741	110	1851	0.0594273	0.0594273		0.9977	716.707	1.2925	715.415	2.58501	718	0.00360029	0.00845741
		0.4135	1796	56	1740	112	1852	0.0604752	0.0600536		0.9977	717.703	1.29671	716.407	2.59341	719	0.00360697	0.00845741
		0.4128	1797	56	1741	112	1853	0.0604425	0.0600536		0.9977	718.699	1.30092	717.398	2.60184	720	0.00361367	0.00845741
		0.4123	1798	56	1742	112	1854	0.0604099	0.0600536		0.9977	719.695	1.30515	718.39	2.6103	721	0.00362039	0.00845741
		0.412	1799	56	1743	112	1855	0.0603774	0.0600536		0.9977	720.691	1.30939	719.381	2.61878	722	0.00362712	0.00845741
		0.4112	1800	56	1744	112	1856	0.0603448	0.0600536		0.9977	721.686	1.31365	720.373	2.62729	723	0.00363388	0.00845741
		0.4109	1801	56	1745	112	1857	0.0603123	0.0600536		0.9977	722.682	1.31791	721.364	2.63583	724	0.00364065	0.00845741
		0.4083	1802	56	1746	112	1858	0.0602799	0.0600536		0.9977	723.678	1.3222	722.356	2.64439	725	0.00364744	0.00845741
		0.4078	1803	56	1747	112	1859	0.0602474	0.0600536		0.9977	724.674	1.32649	723.347	2.65298	726	0.00365424	0.00845741
		0.4065	1804	56	1748	112	1860	0.0602151	0.0600536		0.9977	725.669	1.3308	724.338	2.6616	727	0.00366107	0.00845741
		0.404	1805	56	1749	112	1861	0.0601827	0.0600536		0.9976	726.665	1.33512	725.33	2.67024	728	0.00366791	0.00872365
		0.4034	1807	56	1751	112	1863	0.0601181	0.0600536		0.9976	727.661	1.33946	726.321	2.67891	729	0.00367477	0.00872365
		0.3989	1808	56	1752	112	1864	0.0600858	0.0600536		0.9976	728.656	1.3438	727.312	2.68761	730	0.00368165	0.00872365
		0.3975	1809	56	1753	112	1865	0.0600536	0.0600536		0.9976	729.652	1.34817	728.304	2.69633	731	0.00368855	0.00872365
		0.3961	1809	57	1752	114	1866	0.0610932	0.0610932		0.9976	730.647	1.35254	729.295	2.70508	732	0.00369547	0.00872365
		0.3934	1809	58	1751	116	1867	0.0621318	0.0620653		0.9976	731.643	1.35693	730.286	2.71386	733	0.0037024	0.00872365
		0.3921	1810	58	1752	116	1868	0.0620985	0.0620653		0.9976	732.639	1.36133	731.277	2.72266	734	0.00370935	0.00872365
		0.3918	1811	58	1753	116	1869	0.0620653	0.0620653		0.9975	733.634	1.36575	732.269	2.7315	735	0.00371632	0.00897181
		0.3915	1811	59	1752	118	1870	0.0631016	0.0627994		0.9975	734.63	1.37018	733.26	2.74036	736	0.00372331	0.00897181
		0.3906	1812	59	1753	118	1871	0.0630679	0.0627994		0.9975	735.625	1.37462	734.251	2.74925	737	0.00373032	0.00897181
		0.3891	1813	59	1754	118	1872	0.0630342	0.0627994		0.9975	736.621	1.37908	735.242	2.75816	738	0.00373735	0.00897181
		0.3889	1814	59	1755	118	1873	0.0630005	0.0627994		0.9975	737.616	1.38355	736.233	2.76711	739	0.00374439	0.00897181
		0.3879	1815	59	1756	118	1874	0.0629669	0.0627994		0.9975	738.612	1.38804	737.224	2.77608	740	0.00375146	0.00897181
		0.3874	1816	59	1757	118	1875	0.0629333	0.0627994		0.9975	739.607	1.39254	738.215	2.78508	741	0.00375854	0.00897181
		0.3851	1817	59	1758	118	1876	0.0628998	0.0627994		0.9975	740.603	1.39705	739.206	2.79411	742	0.00376564	0.00897181
		0.3849	1818	59	1759	118	1877	0.0628663	0.0627994		0.9975	741.598	1.40158	740.197	2.80316	743	0.00377276	0.00897181
		0.3847	1819	59	1760	118	1878	0.0628328	0.0627994		0.9975	742.594	1.40612	741.188	2.81225	744	0.0037799	0.00897181
		0.383	1820	59	1761	118	1879	0.0627994	0.0627994		0.9975	743.589	1.41068	742.179	2.82136	745	0.00378706	0.00897181
		0.3825	1820	60	1760	120	1880	0.0638298	0.0637281		0.9974	744.585	1.41525	743.169	2.8305	746	0.00379424	0.00915625
		0.3822	1821	60	1761	120	1881	0.0637959	0.0637281		0.9974	745.58	1.41984	744.16	2.83967	747	0.00380144	0.00915625
		0.3819	1822	60	1762	120	1882	0.063762	0.0637281		0.9973	746.576	1.42444	745.151	2.84887	748	0.00380865	0.00922838
		0.3804	1823	60	1763	120	1883	0.0637281	0.0637281		0.9973	747.571	1.42905	746.142	2.8581	749	0.00381589	0.00922838
		0.3799	1823	61	1762	122	1884	0.0647558	0.0643799		0.9973	748.566	1.43368	747.133	2.86736	750	0.00382314	0.00922838
		0.3791	1825	61	1764	122	1886	0.0646872	0.0643799		0.9972	749.562	1.43832	748.123	2.87664	751	0.00383042	0.00933049
		0.3782	1828	61	1767	122	1889	0.0645844	0.0643799		0.9972	750.557	1.44298	749.114	2.88596	752	0.00383771	0.00933049
		0.3771	1829	61	1768	122	1890	0.0645503	0.0643799		0.9972	751.552	1.44765	750.105	2.89531	753	0.00384503	0.00933049
		0.3753	1830	61	1769	122	1891	0.0645161	0.0643799		0.9972	752.548	1.45234	751.095	2.90468	754	0.00385236	0.00933049
		0.3752	1831	61	1770	122	1892	0.064482	0.0643799		0.9971	753.543	1.45704	752.086	2.91408	755	0.00385971	0.00943394
		0.3748	1832	61	1771	122	1893	0.064448	0.0643799		0.9971	754.538	1.46176	753.076	2.92352	756	0.00386709	0.00943394
		0.3718	1833	61	1772	122	1894	0.0644139	0.0643799		0.9971	755.534	1.46649	754.067	2.93298	757	0.00387448	0.00943394
		0.3717	1834	61	1773	122	1895	0.0643799	0.0643799		0.997	756.529	1.47124	755.058	2.94248	758	0.00388189	0.00952369
		0.3716	1835	62	1773	124	1897	0.0653664	0.0653319		0.997	757.524	1.476	756.048	2.952	759	0.00388933	0.00952369
		0.3701	1836	62	1774	124	1898	0.0653319	0.0653319		0.997	758.519	1.48078	757.038	2.96155	760	0.00389678	0.00952369
		0.3695	1836	63	1773	126	1899	0.0663507	0.0663158		0.9969	759.514	1.48557	758.029	2.97114	761	0.00390425	0.00979902
		0.3678	1837	63	1774	126	1900	0.0663158	0.0663158		0.9969	760.51	1.49038	759.019	2.98075	762	0.00391175	0.00979902
		0.3677	1837	64	1773	128	1901	0.067333	0.0671563		0.9969	761.505	1.4952	760.01	2.9904	763	0.00391926	0.00979902
		0.3674	1838	64	1774	128	1902	0.0672976	0.0671563		0.9969	762.5	1.50004	761	3.00007	764	0.0039268	0.00979902
		0.3666	1839	64	1775	128	1903	0.0672622	0.0671563		0.9969	763.495	1.50489	761.99	3.00978	765	0.00393435	0.00979902
		0.3645	1840	64	1776	128	1904	0.0672269	0.0671563		0.9969	764.49	1.50976	762.98	3.01952	766	0.00394193	0.00979902
		0.3643	1841	64	1777	128	1905	0.0671916	0.0671563		0.9969	765.485	1.51464	763.971	3.02928	767	0.00394952	0.00979902
		0.3632	1842	64	1778	128	1906	0.0671563	0.0671563		0.9969	766.48	1.51954	764.961	3.03908	768	0.00395714	0.00979902
		0.3605	1842	65	1777	130	1907	0.0681699	0.0676027		0.9969	767.476	1.52446	765.951	3.04891	769	0.00396478	0.00979902
		0.3604	1843	65	1778	130	1908	0.0681342	0.0676027		0.9969	768.471	1.52939	766.941	3.05877	770	0.00397243	0.00979902
		0.3591	1844	65	1779	130	1909	0.0680985	0.0676027		0.9969	769.466	1.53433	767.931	3.06867	771	0.00398011	0.00979902
		0.3588	1845	65	1780	130	1910	0.0680628	0.0676027		0.9969	770.461	1.5393	768.921	3.07859	772	0.00398781	0.00979902
		0.3581	1847	65	1782	130	1912	0.0679916	0.0676027		0.9969	771.456	1.54427	769.911	3.08855	773	0.00399553	0.00979902
		0.3579	1848	65	1783	130	1913	0.0679561	0.0676027		0.9969	772.451	1.54927	770.901	3.09854	774	0.00400328	0.00979902
		0.3576	1849	65	1784	130	1914	0.0679206	0.0676027		0.9969	773.446	1.55428	771.891	3.10856	775	0.00401104	0.00979902
		0.3563	1850	65	1785	130	1915	0.0678851	0.0676027		0.9968	774.441	1.5593	772.881	3.11861	776	0.00401882	0.0101483
		0.3548	1851	65	1786	130	1916	0.0678497	0.0676027		0.9968	775.436	1.56435	773.871	3.12869	777	0.00402663	0.0101483
		0.3542	1852	65	1787	130	1917	0.0678143	0.0676027		0.9968	776.431	1.5694	774.861	3.13881	778	0.00403446	0.0101483
		0.3536	1853	65	1788	130	1918	0.0677789	0.0676027		0.9968	777.426	1.57448	775.851	3.14895	779	0.0040423	0.0101483
		0.3525	1855	65	1790	130	1920	0.0677083	0.0676027		0.9968	778.42	1.57957	776.841	3.15914	780	0.00405017	0.0101483
		0.3518	1856	65	1791	130	1921	0.0676731	0.0676027		0.9968	779.415	1.58467	777.831	3.16935	781	0.00405807	0.0101483
		0.3511	1857	65	1792	130	1922	0.0676379	0.0676027		0.9968	780.41	1.5898	778.82	3.1796	782	0.00406598	0.0101483
		0.3489	1858	65	1793	130	1923	0.0676027	0.0676027		0.9967	781.405	1.59494	779.81	3.18987	783	0.00407391	0.0102789
		0.3485	1858	66	1792	132	1924	0.0686071	0.0685358		0.9966	782.4	1.60009	780.8	3.20019	784	0.00408187	0.0103284
		0.3471	1859	66	1793	132	1925	0.0685714	0.0685358		0.9966	783.395	1.60527	781.789	3.21053	785	0.00408985	0.0103284
		0.347	1860	66	1794	132	1926	0.0685358	0.0685358		0.9965	784.39	1.61045	782.779	3.22091	786	0.00409785	0.0103782
		0.3457	1861	67	1794	134	1928	0.0695021	0.0693582		0.9964	785.384	1.61566	783.769	3.23132	787	0.00410587	0.0104618
		0.3452	1863	67	1796	134	1930	0.0694301	0.0693582		0.9964	786.379	1.62088	784.758	3.24177	788	0.00411392	0.0104618
		0.3442	1865	67	1798	134	1932	0.0693582	0.0693582		0.9964	787.374	1.62612	785.748	3.25224	789	0.00412198	0.0104618
		0.3434	1865	68	1797	136	1933	0.070357	0.070357		0.9964	788.369	1.63138	786.737	3.26276	790	0.00413007	0.0104618
		0.3427	1865	69	1796	138	1934	0.0713547	0.0713178		0.9963	789.363	1.63665	787.727	3.2733	791	0.00413818	0.0105631
		0.3414	1866	69	1797	138	1935	0.0713178	0.0713178		0.9963	790.358	1.64194	788.716	3.28388	792	0.00414632	0.0105631
		0.3413	1866	70	1796	140	1936	0.072314	0.072314		0.9962	791.353	1.64725	789.706	3.2945	793	0.00415447	0.0106142
		0.3401	1866	71	1795	142	1937	0.0733092	0.0731205		0.9961	792.347	1.65257	790.695	3.30515	794	0.00416265	0.0107172
		0.3397	1868	71	1797	142	1939	0.0732336	0.0731205		0.9961	793.342	1.65791	791.684	3.31583	795	0.00417085	0.0107172
		0.3387	1869	71	1798	142	1940	0.0731959	0.0731205		0.9961	794.337	1.66327	792.673	3.32655	796	0.00417908	0.0107172
		0.3383	1870	71	1799	142	1941	0.0731582	0.0731205		0.9961	795.331	1.66865	793.663	3.3373	797	0.00418732	0.0107172
		0.3379	1871	71	1800	142	1942	0.0731205	0.0731205		0.9961	796.326	1.67404	794.652	3.34808	798	0.00419559	0.0107172
		0.3364	1871	72	1799	144	1943	0.0741122	0.073884		0.996	797.321	1.67945	795.641	3.35891	799	0.00420389	0.010874
		0.3345	1872	72	1800	144	1944	0.0740741	0.073884		0.996	798.315	1.68488	796.63	3.36976	800	0.0042122	0.010874
		0.3339	1873	72	1801	144	1945	0.074036	0.073884		0.996	799.31	1.69033	797.619	3.38065	801	0.00422054	0.010874
		0.3331	1874	72	1802	144	1946	0.0739979	0.073884		0.996	800.304	1.69579	798.608	3.39158	802	0.0042289	0.010874
		0.3321	1876	72	1804	144	1948	0.073922	0.073884		0.9959	801.299	1.70127	799.597	3.40254	803	0.00423729	0.011416
		0.3316	1877	72	1805	144	1949	0.073884	0.073884		0.9959	802.293	1.70677	800.586	3.41354	804	0.0042457	0.011416
		0.3295	1877	73	1804	146	1950	0.0748718	0.0747951		0.9959	803.288	1.71229	801.575	3.42457	805	0.00425413	0.011416
		0.3283	1878	73	1805	146	1951	0.0748334	0.0747951		0.9959	804.282	1.71782	802.564	3.43564	806	0.00426258	0.011416
		0.3282	1879	73	1806	146	1952	0.0747951	0.0747951		0.9959	805.277	1.72337	803.553	3.44675	807	0.00427106	0.011416
		0.3262	1879	74	1805	148	1953	0.0757808	0.0757033		0.9959	806.271	1.72894	804.542	3.45789	808	0.00427957	0.011416
		0.3255	1880	74	1806	148	1954	0.0757421	0.0757033		0.9959	807.265	1.73453	805.531	3.46907	809	0.00428809	0.011416
		0.3254	1881	74	1807	148	1955	0.0757033	0.0757033		0.9959	808.26	1.74014	806.52	3.48028	810	0.00429664	0.011416
		0.3243	1881	75	1806	150	1956	0.0766871	0.0766479		0.9959	809.254	1.74576	807.508	3.49153	811	0.00430522	0.011416
		0.3237	1882	75	1807	150	1957	0.0766479	0.0766479		0.9959	810.249	1.75141	808.497	3.50282	812	0.00431381	0.011416
		0.3218	1883	76	1807	152	1959	0.0775906	0.077472		0.9959	811.243	1.75707	809.486	3.51414	813	0.00432244	0.011416
		0.3199	1884	76	1808	152	1960	0.077551	0.077472		0.9959	812.237	1.76275	810.474	3.5255	814	0.00433108	0.011416
		0.3195	1886	76	1810	152	1962	0.077472	0.077472		0.9959	813.232	1.76845	811.463	3.5369	815	0.00433975	0.011416
		0.3191	1886	77	1809	154	1963	0.0784513	0.0783715		0.9959	814.226	1.77417	812.452	3.54833	816	0.00434845	0.011416
		0.3188	1887	77	1810	154	1964	0.0784114	0.0783715		0.9959	815.22	1.7799	813.44	3.5598	817	0.00435717	0.011416
		0.3181	1888	77	1811	154	1965	0.0783715	0.0783715		0.9959	816.214	1.78566	814.429	3.57131	818	0.00436591	0.011416
		0.3176	1888	78	1810	156	1966	0.0793489	0.0791878		0.9959	817.209	1.79143	815.417	3.58286	819	0.00437468	0.011416
		0.3161	1889	78	1811	156	1967	0.0793086	0.0791878		0.9959	818.203	1.79722	816.406	3.59445	820	0.00438347	0.011416
		0.3152	1890	78	1812	156	1968	0.0792683	0.0791878		0.9959	819.197	1.80303	817.394	3.60607	821	0.00439229	0.011416
		0.3151	1891	78	1813	156	1969	0.079228	0.0791878		0.9959	820.191	1.80886	818.382	3.61773	822	0.00440113	0.011416
		0.3131	1892	78	1814	156	1970	0.0791878	0.0791878		0.9959	821.185	1.81471	819.371	3.62943	823	0.00441	0.011416
		0.3122	1892	79	1813	158	1971	0.0801624	0.0801217		0.9959	822.179	1.82058	820.359	3.64116	824	0.00441889	0.011416
		0.312	1893	79	1814	158	1972	0.0801217	0.0801217		0.9959	823.174	1.82647	821.347	3.65294	825	0.00442781	0.011416
		0.3118	1893	80	1813	160	1973	0.0810948	0.0810537		0.9959	824.168	1.83238	822.335	3.66475	826	0.00443675	0.011416
		0.3107	1894	80	1814	160	1974	0.0810537	0.0810537		0.9959	825.162	1.8383	823.323	3.67661	827	0.00444571	0.011416
		0.3106	1894	81	1813	162	1975	0.0820253	0.0820253		0.9959	826.156	1.84425	824.312	3.6885	828	0.00445471	0.011416
		0.31	1894	82	1812	164	1976	0.082996	0.082912		0.9958	827.15	1.85021	825.3	3.70043	829	0.00446373	0.0119306
		0.3091	1895	82	1813	164	1977	0.082954	0.082912		0.9957	828.144	1.8562	826.288	3.7124	830	0.00447277	0.0120091
		0.3086	1896	82	1814	164	1978	0.082912	0.082912		0.9957	829.138	1.8622	827.276	3.72441	831	0.00448184	0.0120091
		0.3083	1896	83	1813	166	1979	0.0838807	0.0838384		0.9957	830.132	1.86823	828.264	3.73646	832	0.00449093	0.0120091
		0.3057	1897	83	1814	166	1980	0.0838384	0.0838384		0.9956	831.126	1.87427	829.251	3.74854	833	0.00450005	0.0121279
		0.3056	1897	84	1813	168	1981	0.0848057	0.0846774		0.9956	832.12	1.88034	830.239	3.76067	834	0.0045092	0.0121279
		0.3055	1899	84	1815	168	1983	0.0847201	0.0846774		0.9956	833.114	1.88642	831.227	3.77284	835	0.00451837	0.0121279
		0.3052	1900	84	1816	168	1984	0.0846774	0.0846774		0.9955	834.107	1.89252	832.215	3.78505	836	0.00452757	0.0127006
		0.3043	1900	85	1815	170	1985	0.0856423	0.0855561		0.9955	835.101	1.89865	833.203	3.7973	837	0.00453679	0.0127006
		0.3014	1901	85	1816	170	1986	0.0855992	0.0855561		0.9955	836.095	1.90479	834.19	3.80958	838	0.00454604	0.0127006
		0.3013	1902	85	1817	170	1987	0.0855561	0.0855561		0.9955	837.089	1.91096	835.178	3.82191	839	0.00455532	0.0127006
		0.3012	1902	86	1816	172	1988	0.0865191	0.0862588		0.9955	838.083	1.91714	836.166	3.83428	840	0.00456462	0.0127006
		0.3008	1903	86	1817	172	1989	0.0864756	0.0862588		0.9955	839.077	1.92335	837.153	3.84669	841	0.00457395	0.0127006
		0.2999	1904	86	1818	172	1990	0.0864322	0.0862588		0.9955	840.07	1.92957	838.141	3.85914	842	0.00458331	0.0127006
		0.2994	1907	86	1821	172	1993	0.0863021	0.0862588		0.9955	841.064	1.93582	839.128	3.87164	843	0.00459269	0.0127006
		0.299	1908	86	1822	172	1994	0.0862588	0.0862588		0.9955	842.058	1.94209	840.116	3.88417	844	0.0046021	0.0127006
		0.2981	1908	87	1821	174	1995	0.087218	0.087218		0.9955	843.052	1.94837	841.103	3.89675	845	0.00461153	0.0127006
		0.2957	1908	88	1820	176	1996	0.0881764	0.0881764		0.9955	844.045	1.95468	842.091	3.90936	846	0.004621	0.0127006
		0.2956	1908	89	1819	178	1997	0.0891337	0.0889555		0.9955	845.039	1.96101	843.078	3.92202	847	0.00463049	0.0127006
		0.2955	1910	89	1821	178	1999	0.0890445	0.0889555		0.9955	846.033	1.96736	844.065	3.93472	848	0.00464	0.0127006
		0.295	1911	89	1822	178	2000	0.089	0.0889555		0.9955	847.026	1.97373	845.053	3.94747	849	0.00464955	0.0127006
		0.293	1912	89	1823	178	2001	0.0889555	0.0889555		0.9955	848.02	1.98013	846.04	3.96025	850	0.00465912	0.0127006
		0.2915	1912	90	1822	180	2002	0.0899101	0.0898204		0.9955	849.013	1.98654	847.027	3.97308	851	0.00466872	0.0127006
		0.291	1913	90	1823	180	2003	0.0898652	0.0898204		0.9955	850.007	1.99297	848.014	3.98595	852	0.00467834	0.0127006
		0.2904	1914	90	1824	180	2004	0.0898204	0.0898204		0.9955	851.001	1.99943	849.001	3.99886	853	0.004688	0.0127006
		0.2885	1914	91	1823	182	2005	0.0907731	0.0907731		0.9955	851.994	2.00591	849.988	4.01182	854	0.00469768	0.0127006
		0.2879	1914	92	1822	184	2006	0.0917248	0.0917248		0.9955	852.988	2.01241	850.975	4.02481	855	0.00470739	0.0127006
		0.2877	1914	93	1821	186	2007	0.0926756	0.0926756		0.9955	853.981	2.01893	851.962	4.03786	856	0.00471712	0.0127006
		0.2874	1914	94	1820	188	2008	0.0936255	0.093254		0.9955	854.975	2.02547	852.949	4.05094	857	0.00472689	0.0127006
		0.2865	1915	94	1821	188	2009	0.0935789	0.093254		0.9955	855.968	2.03204	853.936	4.06407	858	0.00473668	0.0127006
		0.2844	1916	94	1822	188	2010	0.0935323	0.093254		0.9955	856.961	2.03862	854.923	4.07724	859	0.0047465	0.0127006
		0.2837	1918	94	1824	188	2012	0.0934394	0.093254		0.9955	857.955	2.04523	855.91	4.09046	860	0.00475635	0.0127006
		0.2833	1919	94	1825	188	2013	0.0933929	0.093254		0.9954	858.948	2.05186	856.896	4.10372	861	0.00476622	0.0132823
		0.2831	1920	94	1826	188	2014	0.0933466	0.093254		0.9954	859.941	2.05851	857.883	4.11702	862	0.00477613	0.0132823
		0.2824	1921	94	1827	188	2015	0.0933002	0.093254		0.9953	860.935	2.06519	858.87	4.13037	863	0.00478606	0.0133933
		0.2795	1922	94	1828	188	2016	0.093254	0.093254		0.9953	861.928	2.07188	859.856	4.14377	864	0.00479602	0.0133933
		0.2793	1922	95	1827	190	2017	0.0941993	0.0941993		0.9953	862.921	2.0786	860.843	4.1572	865	0.00480602	0.0133933
		0.2782	1922	96	1826	192	2018	0.0951437	0.0950495		0.9952	863.915	2.08534	861.829	4.17069	866	0.00481604	0.0135054
		0.2772	1923	96	1827	192	2019	0.0950966	0.0950495		0.9952	864.908	2.09211	862.816	4.18421	867	0.00482608	0.0135054
		0.2765	1924	96	1828	192	2020	0.0950495	0.0950495		0.9951	865.901	2.09889	863.802	4.19779	868	0.00483616	0.0135958
		0.2762	1924	97	1827	194	2021	0.0959921	0.0956607		0.9951	866.894	2.1057	864.789	4.21141	869	0.00484627	0.0135958
		0.2754	1925	97	1828	194	2022	0.0959446	0.0956607		0.995	867.887	2.11253	865.775	4.22507	870	0.0048564	0.013664
		0.2746	1926	97	1829	194	2023	0.0958972	0.0956607		0.9949	868.881	2.11939	866.761	4.23878	871	0.00486657	0.0147357
		0.2742	1927	97	1830	194	2024	0.0958498	0.0956607		0.9949	869.874	2.12627	867.747	4.25254	872	0.00487676	0.0147357
		0.2737	1928	97	1831	194	2025	0.0958025	0.0956607		0.9949	870.867	2.13317	868.734	4.26634	873	0.00488698	0.0147357
		0.2715	1930	97	1833	194	2027	0.0957079	0.0956607		0.9949	871.86	2.14009	869.72	4.28018	874	0.00489724	0.0147357
		0.2707	1931	97	1834	194	2028	0.0956607	0.0956607		0.9949	872.853	2.14704	870.706	4.29408	875	0.00490752	0.0147357
		0.2704	1931	98	1833	196	2029	0.0965993	0.0965042		0.9949	873.846	2.15401	871.692	4.30802	876	0.00491783	0.0147357
		0.2693	1932	98	1834	196	2030	0.0965517	0.0965042		0.9949	874.839	2.161	872.678	4.32201	877	0.00492817	0.0147357
		0.2678	1933	98	1835	196	2031	0.0965042	0.0965042		0.9949	875.832	2.16802	873.664	4.33604	878	0.00493855	0.0147357
		0.2675	1933	99	1834	198	2032	0.0974409	0.0974409		0.9949	876.825	2.17506	874.65	4.35012	879	0.00494895	0.0147357
		0.2673	1933	100	1833	200	2033	0.0983768	0.0978953		0.9949	877.818	2.18213	875.636	4.36425	880	0.00495938	0.0147357
		0.2663	1934	100	1834	200	2034	0.0983284	0.0978953		0.9949	878.811	2.18922	876.622	4.37843	881	0.00496984	0.0147357
		0.265	1935	100	1835	200	2035	0.0982801	0.0978953		0.9949	879.804	2.19633	877.607	4.39265	882	0.00498033	0.0147357
		0.2641	1936	100	1836	200	2036	0.0982318	0.0978953		0.9949	880.797	2.20346	878.593	4.40693	883	0.00499086	0.0147357
		0.2637	1937	100	1837	200	2037	0.0981836	0.0978953		0.9949	881.789	2.21062	879.579	4.42125	884	0.00500141	0.0147357
		0.2633	1938	100	1838	200	2038	0.0981354	0.0978953		0.9949	882.782	2.21781	880.564	4.43561	885	0.00501199	0.0147357
		0.2629	1939	100	1839	200	2039	0.0980873	0.0978953		0.9949	883.775	2.22502	881.55	4.45003	886	0.00502261	0.0147357
		0.2628	1940	100	1840	200	2040	0.0980392	0.0978953		0.9949	884.768	2.23225	882.536	4.4645	887	0.00503325	0.0147357
		0.2605	1942	100	1842	200	2042	0.0979432	0.0978953		0.9949	885.76	2.23951	883.521	4.47901	888	0.00504393	0.0147357
		0.2602	1943	100	1843	200	2043	0.0978953	0.0978953		0.9949	886.753	2.24679	884.506	4.49357	889	0.00505464	0.0147357
		0.26	1943	101	1842	202	2044	0.0988258	0.0987292		0.9949	887.746	2.25409	885.492	4.50819	890	0.00506538	0.0147357
		0.2598	1944	101	1843	202	2045	0.0987775	0.0987292		0.9949	888.739	2.26142	886.477	4.52285	891	0.00507615	0.0147357
		0.2587	1945	101	1844	202	2046	0.0987292	0.0987292		0.9949	889.731	2.26878	887.462	4.53756	892	0.00508695	0.0147357
		0.2579	1945	102	1843	204	2047	0.099658	0.0995608		0.9949	890.724	2.27616	888.448	4.55232	893	0.00509778	0.0147357
		0.2573	1947	102	1845	204	2049	0.0995608	0.0995608		0.9949	891.716	2.28356	889.433	4.56713	894	0.00510865	0.0147357
		0.2567	1947	104	1843	208	2051	0.101414	0.101414		0.9949	892.709	2.29099	890.418	4.58199	895	0.00511954	0.0147357
		0.2566	1947	105	1842	210	2052	0.102339	0.102289		0.9949	893.702	2.29845	891.403	4.5969	896	0.00513047	0.0147357
		0.2558	1948	105	1843	210	2053	0.102289	0.102289		0.9949	894.694	2.30593	892.388	4.61186	897	0.00514143	0.0147357
		0.2555	1948	106	1842	212	2054	0.103213	0.103163		0.9949	895.687	2.31344	893.373	4.62687	898	0.00515242	0.0147357
		0.2548	1949	106	1843	212	2055	0.103163	0.103163		0.9949	896.679	2.32097	894.358	4.64194	899	0.00516344	0.0147357
		0.2543	1949	107	1842	214	2056	0.104086	0.103833		0.9949	897.671	2.32852	895.343	4.65705	900	0.0051745	0.0147357
		0.2537	1950	107	1843	214	2057	0.104035	0.103833		0.9949	898.664	2.33611	896.328	4.67221	901	0.00518559	0.0147357
		0.2534	1952	107	1845	214	2059	0.103934	0.103833		0.9949	899.656	2.34372	897.313	4.68743	902	0.00519671	0.0147357
		0.253	1953	107	1846	214	2060	0.103883	0.103833		0.9949	900.649	2.35135	898.297	4.7027	903	0.00520786	0.0147357
		0.2526	1954	107	1847	214	2061	0.103833	0.103833		0.9949	901.641	2.35901	899.282	4.71802	904	0.00521905	0.0147357
		0.2521	1954	108	1846	216	2062	0.104753	0.104046		0.9949	902.633	2.36669	900.267	4.73339	905	0.00523026	0.0147357
		0.2518	1960	108	1852	216	2068	0.104449	0.104046		0.9949	903.626	2.37441	901.251	4.74881	906	0.00524152	0.0147357
		0.2516	1961	108	1853	216	2069	0.104398	0.104046		0.9949	904.618	2.38214	902.236	4.76429	907	0.0052528	0.0147357
		0.2511	1963	108	1855	216	2071	0.104297	0.104046		0.9949	905.61	2.38991	903.22	4.77982	908	0.00526412	0.0147357
		0.2507	1964	108	1856	216	2072	0.104247	0.104046		0.9949	906.602	2.3977	904.205	4.7954	909	0.00527547	0.0147357
		0.2499	1965	108	1857	216	2073	0.104197	0.104046		0.9949	907.594	2.40552	905.189	4.81103	910	0.00528685	0.0147357
		0.2497	1966	108	1858	216	2074	0.104147	0.104046		0.9949	908.587	2.41336	906.173	4.82672	911	0.00529827	0.0147357
		0.2495	1967	108	1859	216	2075	0.104096	0.104046		0.9949	909.579	2.42123	907.158	4.84246	912	0.00530972	0.0147357
		0.2489	1968	108	1860	216	2076	0.104046	0.104046		0.9949	910.571	2.42913	908.142	4.85826	913	0.0053212	0.0147357
		0.2486	1968	109	1859	218	2077	0.104959	0.104306		0.9949	911.563	2.43705	909.126	4.87411	914	0.00533272	0.0147357
		0.2475	1969	109	1860	218	2078	0.104909	0.104306		0.9948	912.555	2.445	910.11	4.89001	915	0.00534427	0.0159295
		0.2474	1970	109	1861	218	2079	0.104858	0.104306		0.9948	913.547	2.45298	911.094	4.90597	916	0.00535586	0.0159295
		0.2468	1971	109	1862	218	2080	0.104808	0.104306		0.9947	914.539	2.46099	912.078	4.92198	917	0.00536748	0.016148
		0.2466	1972	109	1863	218	2081	0.104757	0.104306		0.9947	915.531	2.46902	913.062	4.93804	918	0.00537913	0.016148
		0.2459	1973	109	1864	218	2082	0.104707	0.104306		0.9947	916.523	2.47708	914.046	4.95416	919	0.00539082	0.016148
		0.2456	1974	109	1865	218	2083	0.104657	0.104306		0.9947	917.515	2.48517	915.03	4.97034	920	0.00540254	0.016148
		0.2455	1976	109	1867	218	2085	0.104556	0.104306		0.9947	918.507	2.49328	916.013	4.98657	921	0.0054143	0.016148
		0.2447	1978	109	1869	218	2087	0.104456	0.104306		0.9947	919.499	2.50143	916.997	5.00285	922	0.00542609	0.016148
		0.2445	1979	109	1870	218	2088	0.104406	0.104306		0.9946	920.49	2.5096	917.981	5.0192	923	0.00543792	0.0164257
		0.2432	1981	109	1872	218	2090	0.104306	0.104306		0.9946	921.482	2.5178	918.964	5.03559	924	0.00544978	0.0164257
		0.2429	1982	110	1872	220	2092	0.105163	0.105112		0.9946	922.474	2.52602	919.948	5.05205	925	0.00546167	0.0164257
		0.2424	1983	110	1873	220	2093	0.105112	0.105112		0.9946	923.466	2.53428	920.931	5.06856	926	0.0054736	0.0164257
		0.242	1983	111	1872	222	2094	0.106017	0.105967		0.9945	924.457	2.54256	921.915	5.08512	927	0.00548557	0.0165665
		0.2408	1984	111	1873	222	2095	0.105967	0.105967		0.9944	925.449	2.55087	922.898	5.10175	928	0.00549757	0.0166233
		0.2407	1985	113	1872	226	2098	0.107722	0.107722		0.9943	926.441	2.55921	923.882	5.11843	929	0.00550961	0.0167087
		0.2406	2087	168	1919	336	2255	0.149002	0.148541		0.9943	927.432	2.56758	924.865	5.13517	930	0.00552168	0.0167087
		0.2405	2088	168	1920	336	2256	0.148936	0.148541		0.9941	928.424	2.57598	925.848	5.15196	931	0.00553379	0.0167947
		0.2402	2089	168	1921	336	2257	0.14887	0.148541		0.994	929.416	2.58441	926.831	5.16881	932	0.00554594	0.0171435
		0.24	2090	168	1922	336	2258	0.148804	0.148541		0.994	930.407	2.59286	927.814	5.18572	933	0.00555812	0.0171435
		0.2391	2091	168	1923	336	2259	0.148738	0.148541		0.994	931.399	2.60135	928.797	5.20269	934	0.00557033	0.0171435
		0.2388	2092	168	1924	336	2260	0.148673	0.148541		0.994	932.39	2.60986	929.78	5.21972	935	0.00558259	0.0171435
		0.2383	2093	168	1925	336	2261	0.148607	0.148541		0.994	933.382	2.6184	930.763	5.2368	936	0.00559487	0.0171435
		0.2381	2094	168	1926	336	2262	0.148541	0.148541		0.994	934.373	2.62697	931.746	5.25395	937	0.0056072	0.0171435
		0.2375	2094	169	1925	338	2263	0.149359	0.149359		0.994	935.364	2.63557	932.729	5.27115	938	0.00561956	0.0171435
		0.2372	2094	170	1924	340	2264	0.150177	0.149451		0.994	936.356	2.6442	933.712	5.28841	939	0.00563196	0.0171435
		0.237	2095	170	1925	340	2265	0.15011	0.149451		0.994	937.347	2.65287	934.694	5.30573	940	0.00564439	0.0171435
		0.2368	2096	170	1926	340	2266	0.150044	0.149451		0.994	938.338	2.66156	935.677	5.32311	941	0.00565687	0.0171435
		0.2363	2097	170	1927	340	2267	0.149978	0.149451		0.994	939.33	2.67028	936.659	5.34055	942	0.00566937	0.0171435
		0.2359	2098	170	1928	340	2268	0.149912	0.149451		0.9937	940.321	2.67903	937.642	5.35805	943	0.00568192	0.0176513
		0.2352	2099	170	1929	340	2269	0.149846	0.149451		0.9937	941.312	2.68781	938.624	5.37561	944	0.0056945	0.0176513
		0.2335	2100	170	1930	340	2270	0.14978	0.149451		0.9937	942.303	2.69662	939.607	5.39323	945	0.00570712	0.0176513
		0.2332	2101	170	1931	340	2271	0.149714	0.149451		0.9937	943.295	2.70546	940.589	5.41091	946	0.00571978	0.0176513
		0.233	2102	170	1932	340	2272	0.149648	0.149451		0.9937	944.286	2.71433	941.571	5.42866	947	0.00573248	0.0176513
		0.2329	2103	170	1933	340	2273	0.149582	0.149451		0.9937	945.277	2.72323	942.554	5.44646	948	0.00574521	0.0176513
		0.2321	2104	170	1934	340	2274	0.149516	0.149451		0.9935	946.268	2.73216	943.536	5.46433	949	0.00575798	0.017896
		0.2319	2105	170	1935	340	2275	0.149451	0.149451		0.9935	947.259	2.74113	944.518	5.48225	950	0.00577079	0.017896
		0.2288	2105	171	1934	342	2276	0.150264	0.150132		0.9933	948.25	2.75012	945.5	5.50024	951	0.00578364	0.0179887
		0.2268	2107	171	1936	342	2278	0.150132	0.150132		0.9931	949.241	2.75915	946.482	5.51829	952	0.00579653	0.0180819
		0.2263	2107	172	1935	344	2279	0.150943	0.150943		0.9931	950.232	2.7682	947.464	5.5364	953	0.00580945	0.0180819
		0.2258	2107	173	1934	346	2280	0.151754	0.151754		0.993	951.223	2.77729	948.445	5.55458	954	0.00582241	0.0182071
		0.2251	2107	174	1933	348	2281	0.152565	0.152565		0.993	952.214	2.78641	949.427	5.57282	955	0.00583541	0.0182071
		0.225	2109	175	1934	350	2284	0.15324	0.152838		0.9929	953.204	2.79556	950.409	5.59112	956	0.00584845	0.0183966
		0.2247	2110	175	1935	350	2285	0.153173	0.152838		0.9929	954.195	2.80474	951.391	5.60949	957	0.00586153	0.0183966
		0.2245	2111	175	1936	350	2286	0.153106	0.152838		0.9929	955.186	2.81396	952.372	5.62791	958	0.00587465	0.0183966
		0.2233	2114	175	1939	350	2289	0.152905	0.152838		0.9929	956.177	2.8232	953.354	5.64641	959	0.00588781	0.0183966
		0.2232	2115	175	1940	350	2290	0.152838	0.152838		0.9928	957.168	2.83248	954.335	5.66496	960	0.005901	0.0187172
		0.2228	2115	176	1939	352	2291	0.153645	0.153243		0.9928	958.158	2.84179	955.316	5.68358	961	0.00591424	0.0187172
		0.2224	2116	176	1940	352	2292	0.153578	0.153243		0.9928	959.149	2.85113	956.298	5.70227	962	0.00592751	0.0187172
		0.2218	2117	176	1941	352	2293	0.153511	0.153243		0.9928	960.139	2.86051	957.279	5.72102	963	0.00594083	0.0187172
		0.2212	2118	176	1942	352	2294	0.153444	0.153243		0.9928	961.13	2.86992	958.26	5.73983	964	0.00595418	0.0187172
		0.2211	2119	176	1943	352	2295	0.153377	0.153243		0.9928	962.121	2.87936	959.241	5.75871	965	0.00596758	0.0187172
		0.2201	2120	176	1944	352	2296	0.15331	0.153243		0.9927	963.111	2.88883	960.222	5.77766	966	0.00598101	0.0191432
		0.2184	2121	176	1945	352	2297	0.153243	0.153243		0.9927	964.102	2.89833	961.203	5.79667	967	0.00599449	0.0191432
		0.2182	2121	177	1944	354	2298	0.154047	0.154047		0.9927	965.092	2.90787	962.184	5.81575	968	0.006008	0.0191432
		0.2178	2122	178	1944	356	2300	0.154783	0.154581		0.9927	966.083	2.91744	963.165	5.83489	969	0.00602156	0.0191432
		0.2165	2123	178	1945	356	2301	0.154715	0.154581		0.9927	967.073	2.92705	964.146	5.8541	970	0.00603515	0.0191432
		0.2162	2125	178	1947	356	2303	0.154581	0.154581		0.9927	968.063	2.93669	965.127	5.87337	971	0.00604879	0.0191432
		0.2153	2125	179	1946	358	2304	0.155382	0.155315		0.9927	969.054	2.94636	966.107	5.89272	972	0.00606247	0.0191432
		0.2148	2126	179	1947	358	2305	0.155315	0.155315		0.9926	970.044	2.95606	967.088	5.91213	973	0.00607619	0.0194106
		0.2146	2126	180	1946	360	2306	0.156114	0.155912		0.9924	971.034	2.9658	968.068	5.93161	974	0.00608995	0.0194781
		0.2144	2127	180	1947	360	2307	0.156047	0.155912		0.9923	972.024	2.97558	969.049	5.95115	975	0.00610375	0.0197506
		0.2139	2129	180	1949	360	2309	0.155912	0.155912		0.9923	973.015	2.98538	970.029	5.97077	976	0.00611759	0.0197506
		0.2137	2129	181	1948	362	2310	0.15671	0.156642		0.9923	974.005	2.99522	971.01	5.99045	977	0.00613147	0.0197506
		0.2135	2130	181	1949	362	2311	0.156642	0.156642		0.9923	974.995	3.0051	971.99	6.0102	978	0.0061454	0.0197506
		0.2127	2131	182	1949	364	2313	0.157371	0.1571		0.9923	975.985	3.01501	972.97	6.03002	979	0.00615937	0.0197506
		0.2126	2132	182	1950	364	2314	0.157303	0.1571		0.9923	976.975	3.02495	973.95	6.04991	980	0.00617337	0.0197506
		0.2124	2133	182	1951	364	2315	0.157235	0.1571		0.9923	977.965	3.03493	974.93	6.06986	981	0.00618743	0.0197506
		0.2122	2134	182	1952	364	2316	0.157168	0.1571		0.9922	978.955	3.04495	975.91	6.08989	982	0.00620152	0.0200273
		0.2116	2135	182	1953	364	2317	0.1571	0.1571		0.9921	979.945	3.05499	976.89	6.10999	983	0.00621566	0.0200971
		0.2113	2135	183	1952	366	2318	0.157895	0.157759		0.9919	980.935	3.06508	977.87	6.13016	984	0.00622983	0.0205933
		0.2108	2136	183	1953	366	2319	0.157827	0.157759		0.9919	981.925	3.0752	978.85	6.15039	985	0.00624405	0.0205933
		0.2103	2137	183	1954	366	2320	0.157759	0.157759		0.9919	982.915	3.08535	979.829	6.1707	986	0.00625832	0.0205933
		0.2093	2137	184	1953	368	2321	0.158552	0.158552		0.9919	983.904	3.09554	980.809	6.19108	987	0.00627263	0.0205933
		0.2089	2137	185	1952	370	2322	0.159345	0.15873		0.9919	984.894	3.10577	981.788	6.21153	988	0.00628698	0.0205933
		0.2082	2139	185	1954	370	2324	0.159208	0.15873		0.9919	985.884	3.11603	982.768	6.23205	989	0.00630137	0.0205933
		0.2081	2140	185	1955	370	2325	0.15914	0.15873		0.9919	986.874	3.12632	983.747	6.25265	990	0.0063158	0.0205933
		0.2076	2141	185	1956	370	2326	0.159071	0.15873		0.9919	987.863	3.13666	984.727	6.27331	991	0.00633028	0.0205933
		0.2073	2142	185	1957	370	2327	0.159003	0.15873		0.9919	988.853	3.14702	985.706	6.29405	992	0.00634481	0.0205933
		0.2068	2143	185	1958	370	2328	0.158935	0.15873		0.9919	989.843	3.15743	986.685	6.31486	993	0.00635937	0.0205933
		0.2065	2144	185	1959	370	2329	0.158866	0.15873		0.9919	990.832	3.16787	987.664	6.33574	994	0.00637399	0.0205933
		0.2063	2145	185	1960	370	2330	0.158798	0.15873		0.9919	991.822	3.17835	988.643	6.3567	995	0.00638864	0.0205933
		0.2061	2146	185	1961	370	2331	0.15873	0.15873		0.9919	992.811	3.18886	989.622	6.37773	996	0.00640334	0.0205933
		0.2058	2146	186	1960	372	2332	0.15952	0.15952		0.9917	993.801	3.19941	990.601	6.39883	997	0.00641808	0.0212137
		0.2057	2146	187	1959	374	2333	0.160309	0.160103		0.9917	994.79	3.21	991.58	6.42001	998	0.00643287	0.0212137
		0.205	2147	187	1960	374	2334	0.16024	0.160103		0.9917	995.779	3.22063	992.559	6.44126	999	0.0064477	0.0212137
		0.2044	2148	187	1961	374	2335	0.160171	0.160103		0.9917	996.769	3.23129	993.537	6.46258	1000	0.00646258	0.0212137
		0.2042	2149	187	1962	374	2336	0.160103	0.160103		0.9916	997.758	3.24199	994.516	6.48398	1001	0.0064775	0.0213999
		0.2038	2149	188	1961	376	2337	0.16089	0.16089		0.9914	998.747	3.25273	995.495	6.50546	1002	0.00649247	0.0215502
		0.2035	2150	189	1961	378	2339	0.161608	0.161401		0.9914	999.736	3.2635	996.473	6.52701	1003	0.00650748	0.0215502
		0.2032	2151	189	1962	378	2340	0.161538	0.161401		0.9914	1000.73	3.27432	997.451	6.54863	1004	0.00652254	0.0215502
		0.2028	2153	189	1964	378	2342	0.161401	0.161401		0.9913	1001.71	3.28517	998.43	6.57033	1005	0.00653765	0.0217017
		0.2027	2153	190	1963	380	2343	0.162185	0.162185		0.9912	1002.7	3.29606	999.408	6.59211	1006	0.0065528	0.0217778
		0.2025	2153	191	1962	382	2344	0.162969	0.162761		0.9911	1003.69	3.30698	1000.39	6.61397	1007	0.00656799	0.0218542
		0.2018	2154	191	1963	382	2345	0.1629	0.162761		0.991	1004.68	3.31795	1001.36	6.6359	1008	0.00658323	0.0220466
		0.2017	2155	191	1964	382	2346	0.16283	0.162761		0.991	1005.67	3.32895	1002.34	6.65791	1009	0.00659852	0.0220466
		0.2014	2156	191	1965	382	2347	0.162761	0.162761		0.991	1006.66	3.34	1003.32	6.67999	1010	0.00661385	0.0220466
		0.2008	2156	192	1964	384	2348	0.163543	0.163543		0.991	1007.65	3.35108	1004.3	6.70215	1011	0.00662923	0.0220466
		0.2004	2157	193	1964	386	2350	0.164255	0.163976		0.9909	1008.64	3.3622	1005.28	6.72439	1012	0.00664466	0.0222798
		0.1996	2159	193	1966	386	2352	0.164116	0.163976		0.9909	1009.63	3.37336	1006.25	6.74671	1013	0.00666013	0.0222798
		0.1993	2160	193	1967	386	2353	0.164046	0.163976		0.9908	1010.62	3.38456	1007.23	6.76911	1014	0.00667565	0.0223974
		0.1984	2161	193	1968	386	2354	0.163976	0.163976		0.9907	1011.6	3.39579	1008.21	6.79159	1015	0.00669122	0.0224762
		0.1977	2161	194	1967	388	2355	0.164756	0.164756		0.9905	1012.59	3.40707	1009.19	6.81414	1016	0.00670683	0.0225552
		0.1971	2161	195	1966	390	2356	0.165535	0.165254		0.9902	1013.58	3.41839	1010.16	6.83678	1017	0.00672249	0.0230765
		0.1963	2162	195	1967	390	2357	0.165465	0.165254		0.9902	1014.57	3.42975	1011.14	6.85949	1018	0.0067382	0.0230765
		0.1961	2165	195	1970	390	2360	0.165254	0.165254		0.9902	1015.56	3.44114	1012.12	6.88229	1019	0.00675396	0.0230765
		0.196	2165	196	1969	392	2361	0.166031	0.165961		0.9902	1016.55	3.45258	1013.09	6.90516	1020	0.00676976	0.0230765
		0.1957	2166	196	1970	392	2362	0.165961	0.165961		0.9902	1017.54	3.46406	1014.07	6.92812	1021	0.00678562	0.0230765
		0.1954	2166	197	1969	394	2363	0.166737	0.166596		0.9902	1018.52	3.47558	1015.05	6.95115	1022	0.00680152	0.0230765
		0.1941	2167	197	1970	394	2364	0.166667	0.166596		0.9902	1019.51	3.48713	1016.03	6.97427	1023	0.00681747	0.0230765
		0.1938	2168	197	1971	394	2365	0.166596	0.166596		0.9902	1020.5	3.49873	1017	6.99747	1024	0.00683346	0.0230765
		0.1934	2169	198	1971	396	2367	0.1673	0.167089		0.9902	1021.49	3.51037	1017.98	7.02075	1025	0.00684951	0.0230765
		0.1931	2170	198	1972	396	2368	0.16723	0.167089		0.9902	1022.48	3.52205	1018.96	7.04411	1026	0.0068656	0.0230765
		0.1928	2171	198	1973	396	2369	0.167159	0.167089		0.9902	1023.47	3.53378	1019.93	7.06755	1027	0.00688175	0.0230765
		0.1927	2172	198	1974	396	2370	0.167089	0.167089		0.9902	1024.45	3.54554	1020.91	7.09108	1028	0.00689794	0.0230765
		0.1925	2173	200	1973	400	2373	0.168563	0.168421		0.9901	1025.44	3.55735	1021.89	7.11469	1029	0.00691418	0.0236107
		0.1924	2174	200	1974	400	2374	0.168492	0.168421		0.99	1026.43	3.56919	1022.86	7.13839	1030	0.00693047	0.0238196
		0.1918	2175	200	1975	400	2375	0.168421	0.168421		0.99	1027.42	3.58108	1023.84	7.16216	1031	0.00694681	0.0238196
		0.1917	2175	201	1974	402	2376	0.169192	0.168908		0.99	1028.41	3.59301	1024.81	7.18603	1032	0.0069632	0.0238196
		0.1916	2178	201	1977	402	2379	0.168979	0.168908		0.99	1029.4	3.60499	1025.79	7.20997	1033	0.00697964	0.0238196
		0.1913	2179	201	1978	402	2380	0.168908	0.168908		0.9899	1030.38	3.617	1026.77	7.234	1034	0.00699613	0.0240305
		0.1908	2180	202	1978	404	2382	0.169605	0.169605		0.9897	1031.37	3.62906	1027.74	7.25812	1035	0.00701267	0.0242434
		0.1906	2180	203	1977	406	2383	0.170373	0.169803		0.9897	1032.36	3.64116	1028.72	7.28232	1036	0.00702927	0.0242434
		0.1905	2181	203	1978	406	2384	0.170302	0.169803		0.9897	1033.35	3.6533	1029.69	7.30661	1037	0.00704591	0.0242434
		0.1904	2182	203	1979	406	2385	0.170231	0.169803		0.9897	1034.33	3.66549	1030.67	7.33098	1038	0.0070626	0.0242434
		0.1903	2183	203	1980	406	2386	0.170159	0.169803		0.9896	1035.32	3.67772	1031.64	7.35544	1039	0.00707934	0.0244583
		0.1901	2184	203	1981	406	2387	0.170088	0.169803		0.9895	1036.31	3.68999	1032.62	7.37998	1040	0.00709614	0.0245449
		0.19	2185	203	1982	406	2388	0.170017	0.169803		0.9894	1037.3	3.70231	1033.6	7.40461	1041	0.00711298	0.0246317
		0.1899	2187	203	1984	406	2390	0.169874	0.169803		0.9892	1038.29	3.71467	1034.57	7.42933	1042	0.00712988	0.0247626
		0.1894	2188	203	1985	406	2391	0.169803	0.169803		0.9892	1039.27	3.72707	1035.55	7.45414	1043	0.00714682	0.0247626
		0.1885	2188	205	1983	410	2393	0.171333	0.171333		0.989	1040.26	3.73952	1036.52	7.47903	1044	0.00716382	0.0248943
		0.1883	2188	206	1982	412	2394	0.172097	0.171953		0.9889	1041.25	3.75201	1037.5	7.50401	1045	0.00718087	0.0254283
		0.188	2190	206	1984	412	2396	0.171953	0.171953		0.9889	1042.24	3.76454	1038.47	7.52909	1046	0.00719798	0.0254283
		0.1876	2190	207	1983	414	2397	0.172716	0.172644		0.9889	1043.22	3.77712	1039.45	7.55425	1047	0.00721513	0.0254283
		0.1875	2191	207	1984	414	2398	0.172644	0.172644		0.9889	1044.21	3.78975	1040.42	7.57949	1048	0.00723234	0.0254283
		0.1873	2192	208	1984	416	2400	0.173333	0.173261		0.9889	1045.2	3.80242	1041.4	7.60483	1049	0.0072496	0.0254283
		0.1868	2193	208	1985	416	2401	0.173261	0.173261		0.9889	1046.18	3.81513	1042.37	7.63026	1050	0.00726691	0.0254283
		0.1867	2193	209	1984	418	2402	0.174022	0.173949		0.9889	1047.17	3.82789	1043.34	7.65578	1051	0.00728428	0.0254283
		0.1865	2194	209	1985	418	2403	0.173949	0.173949		0.9889	1048.16	3.84069	1044.32	7.68139	1052	0.0073017	0.0254283
		0.1863	2194	210	1984	420	2404	0.174709	0.174709		0.9889	1049.15	3.85354	1045.29	7.70709	1053	0.00731917	0.0254283
		0.1861	2226	221	2005	442	2447	0.180629	0.180482		0.9889	1050.13	3.86644	1046.27	7.73288	1054	0.0073367	0.0254283
		0.186	2228	221	2007	442	2449	0.180482	0.180482		0.9889	1051.12	3.87938	1047.24	7.75876	1055	0.00735428	0.0254283
		0.1859	2228	222	2006	444	2450	0.181224	0.181151		0.9888	1052.11	3.89237	1048.22	7.78474	1056	0.00737191	0.0260205
		0.1856	2229	222	2007	444	2451	0.181151	0.181151		0.9888	1053.09	3.9054	1049.19	7.8108	1057	0.0073896	0.0260205
		0.1854	2229	223	2006	446	2452	0.181892	0.181818		0.9885	1054.08	3.91848	1050.16	7.83696	1058	0.00740734	0.0261592
		0.1852	2230	223	2007	446	2453	0.181818	0.181818		0.988	1055.07	3.93161	1051.14	7.86321	1059	0.00742513	0.0262521
		0.1845	2230	224	2006	448	2454	0.182559	0.182485		0.9877	1056.06	3.94478	1052.11	7.88956	1060	0.00744298	0.0263454
		0.1844	2231	224	2007	448	2455	0.182485	0.182485		0.9875	1057.04	3.958	1053.08	7.916	1061	0.00746088	0.026439
		0.1843	2231	226	2005	452	2457	0.183964	0.183964		0.9874	1058.03	3.97127	1054.06	7.94253	1062	0.00747884	0.026533
		0.1838	2232	227	2005	454	2459	0.184628	0.184178		0.9873	1059.02	3.98458	1055.03	7.96916	1063	0.00749686	0.0267695
		0.1836	2233	227	2006	454	2460	0.184553	0.184178		0.9873	1060	3.99794	1056	7.99588	1064	0.00751493	0.0267695
		0.1832	2234	227	2007	454	2461	0.184478	0.184178		0.9873	1060.99	4.01135	1056.98	8.0227	1065	0.00753305	0.0267695
		0.1831	2235	227	2008	454	2462	0.184403	0.184178		0.9873	1061.98	4.02481	1057.95	8.04961	1066	0.00755123	0.0267695
		0.1829	2236	227	2009	454	2463	0.184328	0.184178		0.987	1062.96	4.03831	1058.92	8.07662	1067	0.00756946	0.0270562
		0.1823	2237	227	2010	454	2464	0.184253	0.184178		0.987	1063.95	4.05186	1059.9	8.10372	1068	0.00758776	0.0270562
		0.1821	2238	227	2011	454	2465	0.184178	0.184178		0.9869	1064.93	4.06546	1060.87	8.13092	1069	0.0076061	0.0273461
		0.1819	2239	228	2011	456	2467	0.18484	0.18484		0.9869	1065.92	4.07911	1061.84	8.15822	1070	0.00762451	0.0273461
		0.1818	2239	230	2009	460	2469	0.18631	0.18631		0.9869	1066.91	4.09281	1062.81	8.18562	1071	0.00764297	0.0273461
		0.1814	2239	231	2008	462	2470	0.187045	0.187045		0.9869	1067.89	4.10655	1063.79	8.21311	1072	0.00766148	0.0273461
		0.1812	2239	232	2007	464	2471	0.187778	0.187399		0.9867	1068.88	4.12035	1064.76	8.2407	1073	0.00768005	0.0275902
		0.1811	2240	232	2008	464	2472	0.187702	0.187399		0.9866	1069.87	4.13419	1065.73	8.26839	1074	0.00769868	0.0277377
		0.1808	2242	232	2010	464	2474	0.187551	0.187399		0.9866	1070.85	4.14809	1066.7	8.29617	1075	0.00771737	0.0277377
		0.1805	2243	232	2011	464	2475	0.187475	0.187399		0.9865	1071.84	4.16203	1067.68	8.32406	1076	0.00773612	0.0278861
		0.1801	2244	232	2012	464	2476	0.187399	0.187399		0.9863	1072.82	4.17602	1068.65	8.35205	1077	0.00775492	0.0280853
		0.1798	2244	233	2011	466	2477	0.188131	0.187979		0.9863	1073.81	4.19007	1069.62	8.38013	1078	0.00777378	0.0280853
		0.1794	2246	233	2013	466	2479	0.187979	0.187979		0.9863	1074.8	4.20416	1070.59	8.40832	1079	0.00779269	0.0280853
		0.1793	2246	234	2012	468	2480	0.18871	0.18871		0.9861	1075.78	4.2183	1071.56	8.4366	1080	0.00781167	0.0284374
		0.1785	2246	235	2011	470	2481	0.18944	0.18944		0.9861	1076.77	4.23249	1072.54	8.46499	1081	0.0078307	0.0284374
		0.1784	2246	236	2010	472	2482	0.190169	0.189787		0.9861	1077.75	4.24674	1073.51	8.49348	1082	0.00784979	0.0284374
		0.1781	2247	236	2011	472	2483	0.190093	0.189787		0.9861	1078.74	4.26103	1074.48	8.52207	1083	0.00786894	0.0284374
		0.1779	2249	236	2013	472	2485	0.18994	0.189787		0.986	1079.72	4.27538	1075.45	8.55076	1084	0.00788815	0.0286917
		0.1778	2250	236	2014	472	2486	0.189863	0.189787		0.9858	1080.71	4.28978	1076.42	8.57955	1085	0.00790742	0.0287941
		0.1774	2251	236	2015	472	2487	0.189787	0.189787		0.9855	1081.7	4.30422	1077.39	8.60845	1086	0.00792675	0.0289484
		0.177	2252	237	2015	474	2489	0.190438	0.190438		0.9855	1082.68	4.31872	1078.36	8.63745	1087	0.00794614	0.0289484
		0.1769	2252	238	2014	476	2490	0.191165	0.191011		0.9853	1083.67	4.33328	1079.33	8.66655	1088	0.00796558	0.0292075
		0.1768	2254	238	2016	476	2492	0.191011	0.191011		0.9853	1084.65	4.34788	1080.3	8.69576	1089	0.00798509	0.0292075
		0.1765	2254	239	2015	478	2493	0.191737	0.19166		0.9853	1085.64	4.36254	1081.27	8.72507	1090	0.00800465	0.0292075
		0.1764	2255	239	2016	478	2494	0.19166	0.19166		0.9848	1086.62	4.37724	1082.25	8.75449	1091	0.00802428	0.0294165
		0.1761	2256	240	2016	480	2496	0.192308	0.192308		0.9847	1087.61	4.39201	1083.22	8.78401	1092	0.00804397	0.0295216
		0.1758	2256	241	2015	482	2497	0.193032	0.193032		0.9846	1088.59	4.40682	1084.19	8.81364	1093	0.00806371	0.0298926
		0.1755	2256	242	2014	484	2498	0.193755	0.193677		0.9846	1089.58	4.42169	1085.16	8.84337	1094	0.00808352	0.0298926
		0.1752	2257	242	2015	484	2499	0.193677	0.193677		0.9846	1090.56	4.4366	1086.13	8.87321	1095	0.00810339	0.0298926
		0.175	2257	243	2014	486	2500	0.1944	0.194245		0.9846	1091.55	4.45158	1087.1	8.90316	1096	0.00812332	0.0298926
		0.1748	2258	243	2015	486	2501	0.194322	0.194245		0.9846	1092.53	4.4666	1088.07	8.93321	1097	0.00814331	0.0298926
		0.1745	2259	243	2016	486	2502	0.194245	0.194245		0.9846	1093.52	4.48168	1089.04	8.96337	1098	0.00816336	0.0298926
		0.1744	2259	244	2015	488	2503	0.194966	0.194888		0.9842	1094.5	4.49682	1090.01	8.99364	1099	0.00818347	0.0302684
		0.1743	2260	244	2016	488	2504	0.194888	0.194888		0.9841	1095.49	4.51201	1090.98	9.02401	1100	0.00820365	0.0303766
		0.1742	2260	245	2015	490	2505	0.195609	0.195453		0.984	1096.47	4.52725	1091.95	9.0545	1101	0.00822389	0.0304853
		0.174	2262	245	2017	490	2507	0.195453	0.195453		0.9835	1097.46	4.54255	1092.91	9.08509	1102	0.00824419	0.0306491
		0.1737	2263	247	2016	494	2510	0.196813	0.196734		0.9835	1098.44	4.5579	1093.88	9.1158	1103	0.00826455	0.0306491
		0.1733	2264	247	2017	494	2511	0.196734	0.196734		0.9834	1099.43	4.57331	1094.85	9.14661	1104	0.00828497	0.0308138
		0.1731	2264	248	2016	496	2512	0.197452	0.196982		0.9831	1100.41	4.58877	1095.82	9.17754	1105	0.00830546	0.0309794
		0.173	2265	248	2017	496	2513	0.197374	0.196982		0.9831	1101.4	4.60429	1096.79	9.20857	1106	0.00832601	0.0309794
		0.1728	2267	248	2019	496	2515	0.197217	0.196982		0.9828	1102.38	4.61986	1097.76	9.23972	1107	0.00834663	0.0311459
		0.1727	2269	248	2021	496	2517	0.19706	0.196982		0.9827	1103.36	4.63549	1098.73	9.27097	1108	0.0083673	0.0315381
		0.1726	2270	248	2022	496	2518	0.196982	0.196982		0.9827	1104.35	4.65117	1099.7	9.30234	1109	0.00838805	0.0315381
		0.1723	2270	249	2021	498	2519	0.197697	0.197697		0.9827	1105.33	4.66691	1100.67	9.33383	1110	0.00840885	0.0315381
		0.1722	2270	251	2019	502	2521	0.199127	0.199048		0.9827	1106.32	4.68271	1101.63	9.36542	1111	0.00842972	0.0315381
		0.1721	2271	251	2020	502	2522	0.199048	0.199048		0.9827	1107.3	4.69856	1102.6	9.39713	1112	0.00845065	0.0315381
		0.172	2271	252	2019	504	2523	0.199762	0.199762		0.9827	1108.29	4.71447	1103.57	9.42895	1113	0.00847165	0.0315381
		0.1715	2271	253	2018	506	2524	0.200475	0.200158		0.982	1109.27	4.73044	1104.54	9.46088	1114	0.00849271	0.0319354
		0.1712	2275	253	2022	506	2528	0.200158	0.200158		0.9816	1110.25	4.74647	1105.51	9.49293	1115	0.00851384	0.0320499
		0.1711	2275	254	2021	508	2529	0.20087	0.20087		0.9814	1111.24	4.76255	1106.47	9.5251	1116	0.00853503	0.0321648
		0.171	2275	256	2019	512	2531	0.202292	0.202212		0.9812	1112.22	4.77869	1107.44	9.55738	1117	0.00855629	0.0322801
		0.1702	2276	256	2020	512	2532	0.202212	0.202212		0.9807	1113.21	4.79489	1108.41	9.58977	1118	0.00857762	0.0323958
		0.17	2276	257	2019	514	2533	0.202921	0.202681		0.9806	1114.19	4.81114	1109.38	9.62229	1119	0.00859901	0.0326286
		0.1699	2277	257	2020	514	2534	0.202841	0.202681		0.9806	1115.17	4.82746	1110.35	9.65492	1120	0.00862046	0.0326286
		0.1694	2279	257	2022	514	2536	0.202681	0.202681		0.9806	1116.16	4.84383	1111.31	9.68766	1121	0.00864198	0.0326286
		0.1692	2280	258	2022	516	2538	0.20331	0.20323		0.9805	1117.14	4.86026	1112.28	9.72052	1122	0.00866357	0.0328631
		0.1689	2281	258	2023	516	2539	0.20323	0.20323		0.9804	1118.12	4.87675	1113.25	9.75351	1123	0.00868522	0.032981
		0.1687	2282	259	2023	518	2541	0.203857	0.203696		0.9803	1119.11	4.8933	1114.21	9.7866	1124	0.00870694	0.0330994
		0.1686	2283	259	2024	518	2542	0.203777	0.203696		0.9802	1120.09	4.90991	1115.18	9.81982	1125	0.00872873	0.0332181
		0.1684	2284	259	2025	518	2543	0.203696	0.203696		0.98	1121.07	4.92658	1116.15	9.85316	1126	0.00875059	0.033517
		0.1683	2284	260	2024	520	2544	0.204403	0.204403		0.98	1122.06	4.94331	1117.11	9.88662	1127	0.00877251	0.033517
		0.168	2284	261	2023	522	2545	0.205108	0.204626		0.98	1123.04	4.9601	1118.08	9.92019	1128	0.0087945	0.033517
		0.1678	2286	261	2025	522	2547	0.204947	0.204626		0.98	1124.02	4.97695	1119.05	9.95389	1129	0.00881656	0.033517
		0.1677	2287	261	2026	522	2548	0.204867	0.204626		0.9798	1125.01	4.99386	1120.01	9.98771	1130	0.00883868	0.0338793
		0.1675	2288	261	2027	522	2549	0.204786	0.204626		0.9798	1125.99	5.01083	1120.98	10.0217	1131	0.00886088	0.0338793
		0.1673	2289	261	2028	522	2550	0.204706	0.204626		0.9793	1126.97	5.02786	1121.94	10.0557	1132	0.00888314	0.034062
		0.1669	2290	261	2029	522	2551	0.204626	0.204626		0.9792	1127.96	5.04495	1122.91	10.0899	1133	0.00890547	0.0341843
		0.1667	2290	262	2028	524	2552	0.205329	0.205329		0.9789	1128.94	5.0621	1123.88	10.1242	1134	0.00892787	0.0344922
		0.1666	2290	263	2027	526	2553	0.206032	0.20571		0.9789	1129.92	5.07932	1124.84	10.1586	1135	0.00895034	0.0344922
		0.1658	2292	263	2029	526	2555	0.205871	0.20571		0.9789	1130.9	5.09659	1125.81	10.1932	1136	0.00897288	0.0344922
		0.1657	2294	263	2031	526	2557	0.20571	0.20571		0.9789	1131.89	5.11393	1126.77	10.2279	1137	0.00899549	0.0344922
		0.1655	2295	264	2031	528	2559	0.206331	0.206331		0.9788	1132.87	5.13134	1127.74	10.2627	1138	0.00901816	0.0348653
		0.1654	2295	265	2030	530	2560	0.207031	0.20695		0.9788	1133.85	5.1488	1128.7	10.2976	1139	0.00904091	0.0348653
		0.1653	2296	265	2031	530	2561	0.20695	0.20695		0.9787	1134.83	5.16633	1129.67	10.3327	1140	0.00906373	0.0351164
		0.1651	2296	266	2030	532	2562	0.20765	0.20765		0.9787	1135.82	5.18392	1130.63	10.3678	1141	0.00908662	0.0351164
		0.1649	2297	267	2030	534	2564	0.208268	0.208268		0.9786	1136.8	5.20157	1131.6	10.4031	1142	0.00910958	0.0353059
		0.1648	2297	269	2028	538	2566	0.209665	0.209176		0.9785	1137.78	5.21928	1132.56	10.4386	1143	0.00913261	0.0354328
		0.1646	2301	269	2032	538	2570	0.209339	0.209176		0.9784	1138.76	5.23707	1133.53	10.4741	1144	0.00915571	0.0355602
		0.1645	2303	269	2034	538	2572	0.209176	0.209176		0.9781	1139.75	5.25491	1134.49	10.5098	1145	0.00917888	0.0356881
		0.1644	2303	270	2033	540	2573	0.209872	0.209546		0.978	1140.73	5.27282	1135.45	10.5456	1146	0.00920212	0.0358808
		0.1643	2306	270	2036	540	2576	0.209627	0.209546		0.978	1141.71	5.29079	1136.42	10.5816	1147	0.00922544	0.0358808
		0.1641	2307	270	2037	540	2577	0.209546	0.209546		0.9772	1142.69	5.30883	1137.38	10.6177	1148	0.00924883	0.0360745
		0.164	2307	271	2036	542	2578	0.21024	0.21024		0.9771	1143.67	5.32693	1138.35	10.6539	1149	0.00927229	0.0362043
		0.1639	2308	272	2036	544	2580	0.210853	0.210853		0.9769	1144.65	5.3451	1139.31	10.6902	1150	0.00929582	0.0363345
		0.1638	2309	274	2035	548	2583	0.212156	0.211828		0.9768	1145.64	5.36333	1140.27	10.7267	1151	0.00931943	0.0365308
		0.1637	2313	274	2039	548	2587	0.211828	0.211828		0.9768	1146.62	5.38163	1141.24	10.7633	1152	0.0093431	0.0365308
		0.1636	2322	278	2044	556	2600	0.213846	0.213846		0.9767	1147.6	5.39999	1142.2	10.8	1153	0.00936685	0.0367941
		0.1635	2352	290	2062	580	2642	0.219531	0.219531		0.9767	1148.58	5.41842	1143.16	10.8368	1154	0.00939068	0.0367941
		0.1634	2389	313	2076	626	2702	0.23168	0.231595		0.9761	1149.56	5.43692	1144.13	10.8738	1155	0.00941458	0.0369929
		0.1632	2390	313	2077	626	2703	0.231595	0.231595		0.9758	1150.54	5.45548	1145.09	10.911	1156	0.00943855	0.0371928
		0.163	2390	314	2076	628	2704	0.232249	0.232249		0.9758	1151.53	5.47411	1146.05	10.9482	1157	0.00946259	0.0371928
		0.1629	2390	315	2075	630	2705	0.232902	0.232902		0.9755	1152.51	5.49281	1147.01	10.9856	1158	0.00948671	0.0373938
		0.1628	2390	316	2074	632	2706	0.233555	0.233555		0.9752	1153.49	5.51157	1147.98	11.0231	1159	0.00951091	0.0375284
		0.1626	2390	317	2073	634	2707	0.234208	0.234035		0.9751	1154.47	5.5304	1148.94	11.0608	1160	0.00953518	0.0376634
		0.1625	2392	317	2075	634	2709	0.234035	0.234035		0.9747	1155.45	5.5493	1149.9	11.0986	1161	0.00955952	0.037867
		0.1623	2392	318	2074	636	2710	0.234686	0.2346		0.9747	1156.43	5.56827	1150.86	11.1365	1162	0.00958394	0.037867
		0.1622	2393	318	2075	636	2711	0.2346	0.2346		0.9746	1157.41	5.58731	1151.83	11.1746	1163	0.00960844	0.0380717
		0.1621	2398	319	2079	638	2717	0.234818	0.234818		0.9744	1158.39	5.60641	1152.79	11.2128	1164	0.00963301	0.0382088
		0.1619	2398	320	2078	640	2718	0.235467	0.235381		0.9741	1159.37	5.62558	1153.75	11.2512	1165	0.00965766	0.0384845
		0.1617	2399	320	2079	640	2719	0.235381	0.235381		0.9741	1160.36	5.64483	1154.71	11.2897	1166	0.00968238	0.0384845
		0.1615	2400	321	2079	642	2721	0.235943	0.235943		0.9741	1161.34	5.66414	1155.67	11.3283	1167	0.00970718	0.0384845
		0.1613	2401	322	2079	644	2723	0.236504	0.23633		0.9737	1162.32	5.68352	1156.63	11.367	1168	0.00973205	0.0387622
		0.1612	2403	322	2081	644	2725	0.23633	0.23633		0.9734	1163.3	5.70297	1157.59	11.4059	1169	0.00975701	0.0389018
		0.1611	2403	323	2080	646	2726	0.236977	0.236977		0.9731	1164.28	5.72249	1158.56	11.445	1170	0.00978204	0.0390419
		0.1607	2403	324	2079	648	2727	0.237624	0.23745		0.9727	1165.26	5.74208	1159.52	11.4842	1171	0.00980714	0.0391825
		0.1606	2404	324	2080	648	2728	0.237537	0.23745		0.9725	1166.24	5.76174	1160.48	11.5235	1172	0.00983233	0.0393237
		0.1605	2405	324	2081	648	2729	0.23745	0.23745		0.9723	1167.22	5.78148	1161.44	11.563	1173	0.00985759	0.0398934
		0.1603	2405	325	2080	650	2730	0.238095	0.238095		0.9723	1168.2	5.80128	1162.4	11.6026	1174	0.00988293	0.0398934
		0.1601	2405	326	2079	652	2731	0.23874	0.238653		0.9723	1169.18	5.82116	1163.36	11.6423	1175	0.00990835	0.0398934
		0.1598	2406	326	2080	652	2732	0.238653	0.238653		0.9723	1170.16	5.8411	1164.32	11.6822	1176	0.00993385	0.0398934
		0.1597	2406	327	2079	654	2733	0.239297	0.239297		0.9723	1171.14	5.86112	1165.28	11.7222	1177	0.00995942	0.0398934
		0.1594	2407	328	2079	656	2735	0.239854	0.239766		0.9723	1172.12	5.88121	1166.24	11.7624	1178	0.00998508	0.0398934
		0.1593	2408	328	2080	656	2736	0.239766	0.239766		0.9723	1173.1	5.90137	1167.2	11.8027	1179	0.0100108	0.0398934
		0.1591	2408	329	2079	658	2737	0.240409	0.240321		0.9722	1174.08	5.92161	1168.16	11.8432	1180	0.0100366	0.0405444
		0.1588	2409	329	2080	658	2738	0.240321	0.240321		0.9722	1175.06	5.94192	1169.12	11.8838	1181	0.0100625	0.0405444
		0.1586	2409	331	2078	662	2740	0.241606	0.241254		0.9721	1176.04	5.9623	1170.08	11.9246	1182	0.0100885	0.0407638
		0.1583	2411	331	2080	662	2742	0.24143	0.241254		0.9717	1177.02	5.98276	1171.03	11.9655	1183	0.0101146	0.0409107
		0.1582	2412	331	2081	662	2743	0.241342	0.241254		0.9714	1178	6.00329	1171.99	12.0066	1184	0.0101407	0.0410581
		0.158	2413	331	2082	662	2744	0.241254	0.241254		0.9712	1178.98	6.02389	1172.95	12.0478	1185	0.0101669	0.0412061
		0.1579	2415	332	2083	664	2747	0.241718	0.241718		0.9709	1179.96	6.04457	1173.91	12.0891	1186	0.0101932	0.0413546
		0.1576	2415	333	2082	666	2748	0.242358	0.24227		0.9707	1180.93	6.06532	1174.87	12.1306	1187	0.0102196	0.0415037
		0.1574	2416	333	2083	666	2749	0.24227	0.24227		0.9703	1181.91	6.08614	1175.83	12.1723	1188	0.010246	0.0416533
		0.1573	2416	334	2082	668	2750	0.242909	0.242909		0.97	1182.89	6.10705	1176.79	12.2141	1189	0.0102726	0.0419541
		0.1572	2417	335	2082	670	2752	0.243459	0.243459		0.97	1183.87	6.12802	1177.74	12.256	1190	0.0102992	0.0419541
		0.1568	2418	337	2081	674	2755	0.244646	0.244646		0.97	1184.85	6.14908	1178.7	12.2982	1191	0.0103259	0.0419541
		0.1565	2420	338	2082	676	2758	0.245105	0.245105		0.9699	1185.83	6.1702	1179.66	12.3404	1192	0.0103527	0.0422571
		0.1564	2420	339	2081	678	2759	0.245741	0.245741		0.9694	1186.81	6.19141	1180.62	12.3828	1193	0.0103796	0.0424095
		0.1563	2420	341	2079	682	2761	0.247012	0.247012		0.9693	1187.79	6.21269	1181.57	12.4254	1194	0.0104065	0.0425624
		0.1561	2424	343	2081	686	2767	0.247922	0.247922		0.9691	1188.77	6.23405	1182.53	12.4681	1195	0.0104336	0.0427158
		0.156	2425	344	2081	688	2769	0.248465	0.248465		0.9686	1189.74	6.25548	1183.49	12.511	1196	0.0104607	0.0428698
		0.1559	2425	345	2080	690	2770	0.249097	0.248828		0.9684	1190.72	6.277	1184.45	12.554	1197	0.0104879	0.0430244
		0.1556	2428	345	2083	690	2773	0.248828	0.248828		0.9674	1191.7	6.29859	1185.4	12.5972	1198	0.0105152	0.0431795
		0.1554	2428	347	2081	694	2775	0.25009	0.24964		0.9673	1192.68	6.32025	1186.36	12.6405	1199	0.0105425	0.0433352
		0.1553	2429	347	2082	694	2776	0.25	0.24964		0.967	1193.66	6.342	1187.32	12.684	1200	0.01057	0.0434914
		0.155	2430	347	2083	694	2777	0.24991	0.24964		0.9666	1194.64	6.36382	1188.27	12.7276	1201	0.0105975	0.0436482
		0.1549	2433	347	2086	694	2780	0.24964	0.24964		0.9665	1195.61	6.38573	1189.23	12.7715	1202	0.0106252	0.0438056
		0.1548	2433	349	2084	698	2782	0.250899	0.250718		0.9664	1196.59	6.40771	1190.18	12.8154	1203	0.0106529	0.044122
		0.1545	2434	349	2085	698	2783	0.250808	0.250718		0.9664	1197.57	6.42977	1191.14	12.8595	1204	0.0106807	0.044122
		0.1544	2435	349	2086	698	2784	0.250718	0.250718		0.9664	1198.55	6.45191	1192.1	12.9038	1205	0.0107086	0.044122
		0.1543	2435	350	2085	700	2785	0.251346	0.251346		0.9655	1199.53	6.47413	1193.05	12.9483	1206	0.0107365	0.0444408
		0.1541	2435	352	2083	704	2787	0.252601	0.252601		0.9654	1200.5	6.49643	1194.01	12.9929	1207	0.0107646	0.044601
		0.1539	2435	353	2082	706	2788	0.253228	0.252684		0.9651	1201.48	6.51881	1194.96	13.0376	1208	0.0107927	0.0447618
		0.1538	2438	353	2085	706	2791	0.252956	0.252684		0.9645	1202.46	6.54127	1195.92	13.0825	1209	0.010821	0.0450041
		0.1536	2441	353	2088	706	2794	0.252684	0.252684		0.9645	1203.44	6.56382	1196.87	13.1276	1210	0.0108493	0.0450041
		0.1535	2442	354	2088	708	2796	0.253219	0.252947		0.9636	1204.41	6.58644	1197.83	13.1729	1211	0.0108777	0.0454108
		0.1534	2443	354	2089	708	2797	0.253128	0.252947		0.9636	1205.39	6.60914	1198.78	13.2183	1212	0.0109062	0.0454108
		0.1532	2445	354	2091	708	2799	0.252947	0.252947		0.9636	1206.37	6.63193	1199.74	13.2639	1213	0.0109348	0.0454108
		0.153	2446	355	2091	710	2801	0.253481	0.253291		0.9634	1207.35	6.6548	1200.69	13.3096	1214	0.0109634	0.0457389
		0.1528	2447	355	2092	710	2802	0.25339	0.253291		0.9633	1208.32	6.67775	1201.64	13.3555	1215	0.0109922	0.0459038
		0.1527	2448	355	2093	710	2803	0.2533	0.253291		0.9632	1209.3	6.70079	1202.6	13.4016	1216	0.011021	0.0460693
		0.1526	2448	356	2092	712	2804	0.253923	0.253291		0.9629	1210.28	6.72391	1203.55	13.4478	1217	0.01105	0.0462354
		0.1525	2450	356	2094	712	2806	0.253742	0.253291		0.9626	1211.25	6.74711	1204.51	13.4942	1218	0.011079	0.0464021
		0.1524	2451	356	2095	712	2807	0.253652	0.253291		0.9621	1212.23	6.77039	1205.46	13.5408	1219	0.0111081	0.0465694
		0.1522	2453	356	2097	712	2809	0.253471	0.253291		0.962	1213.21	6.79376	1206.41	13.5875	1220	0.0111373	0.0468214
		0.1521	2454	356	2098	712	2810	0.253381	0.253291		0.962	1214.18	6.81721	1207.37	13.6344	1221	0.0111666	0.0468214
		0.152	2455	356	2099	712	2811	0.253291	0.253291		0.9619	1215.16	6.84075	1208.32	13.6815	1222	0.011196	0.0470748
		0.1518	2455	357	2098	714	2812	0.253912	0.253912		0.9617	1216.14	6.86437	1209.27	13.7287	1223	0.0112255	0.0472445
		0.1516	2455	358	2097	716	2813	0.254533	0.254249		0.9611	1217.11	6.88808	1210.22	13.7762	1224	0.011255	0.0474149
		0.1513	2456	358	2098	716	2814	0.254442	0.254249		0.9606	1218.09	6.91187	1211.18	13.8237	1225	0.0112847	0.0475858
		0.1512	2457	358	2099	716	2815	0.254352	0.254249		0.9601	1219.06	6.93575	1212.13	13.8715	1226	0.0113144	0.0477573
		0.1511	2458	358	2100	716	2816	0.254261	0.254249		0.9597	1220.04	6.95972	1213.08	13.9194	1227	0.0113443	0.0480158
		0.151	2458	359	2099	718	2817	0.254881	0.254249		0.9597	1221.02	6.98377	1214.03	13.9675	1228	0.0113742	0.0480158
		0.1509	2459	359	2100	718	2818	0.254791	0.254249		0.9596	1221.99	7.00791	1214.98	14.0158	1229	0.0114042	0.0482756
		0.1505	2460	359	2101	718	2819	0.2547	0.254249		0.9594	1222.97	7.03213	1215.94	14.0643	1230	0.0114344	0.0484496
		0.1503	2462	359	2103	718	2821	0.25452	0.254249		0.959	1223.94	7.05644	1216.89	14.1129	1231	0.0114646	0.0486242
		0.1502	2463	359	2104	718	2822	0.254429	0.254249		0.9589	1224.92	7.08084	1217.84	14.1617	1232	0.0114949	0.0487995
		0.1501	2465	359	2106	718	2824	0.254249	0.254249		0.9584	1225.89	7.10533	1218.79	14.2107	1233	0.0115253	0.0490635
		0.15	2466	360	2106	720	2826	0.254777	0.254597		0.9584	1226.87	7.12991	1219.74	14.2598	1234	0.0115558	0.0490635
		0.1499	2467	360	2107	720	2827	0.254687	0.254597		0.9573	1227.85	7.15457	1220.69	14.3091	1235	0.0115863	0.049329
		0.1498	2468	360	2108	720	2828	0.254597	0.254597		0.9571	1228.82	7.17932	1221.64	14.3586	1236	0.011617	0.0495067
		0.1497	2468	361	2107	722	2829	0.255214	0.255214		0.9561	1229.8	7.20417	1222.59	14.4083	1237	0.0116478	0.0496851
		0.1494	2470	362	2108	724	2832	0.25565	0.255379		0.9559	1230.77	7.2291	1223.54	14.4582	1238	0.0116787	0.0498641
		0.1493	2472	362	2110	724	2834	0.255469	0.255379		0.9558	1231.75	7.25412	1224.49	14.5082	1239	0.0117096	0.0500438
		0.1492	2473	362	2111	724	2835	0.255379	0.255379		0.9556	1232.72	7.27923	1225.44	14.5585	1240	0.0117407	0.0502241
		0.1491	2473	363	2110	726	2836	0.255994	0.255994		0.9552	1233.7	7.30443	1226.39	14.6089	1241	0.0117719	0.0505866
		0.149	2473	364	2109	728	2837	0.256609	0.256609		0.9552	1234.67	7.32973	1227.34	14.6595	1242	0.0118031	0.0505866
		0.1489	2473	366	2107	732	2839	0.257837	0.257656		0.9552	1235.64	7.35511	1228.29	14.7102	1243	0.0118345	0.0505866
		0.1488	2474	366	2108	732	2840	0.257746	0.257656		0.955	1236.62	7.38059	1229.24	14.7612	1244	0.0118659	0.0509517
		0.1487	2475	366	2109	732	2841	0.257656	0.257656		0.9547	1237.59	7.40616	1230.19	14.8123	1245	0.0118974	0.0511353
		0.1486	2475	367	2108	734	2842	0.258269	0.257815		0.9546	1238.57	7.43182	1231.14	14.8636	1246	0.0119291	0.0513194
		0.1485	2476	367	2109	734	2843	0.258178	0.257815		0.9537	1239.54	7.45757	1232.08	14.9151	1247	0.0119608	0.0515043
		0.1484	2478	367	2111	734	2845	0.257996	0.257815		0.9534	1240.52	7.48341	1233.03	14.9668	1248	0.0119926	0.0516898
		0.1481	2480	367	2113	734	2847	0.257815	0.257815		0.9531	1241.49	7.50935	1233.98	15.0187	1249	0.0120246	0.0518759
		0.1479	2480	368	2112	736	2848	0.258427	0.258427		0.9526	1242.46	7.53538	1234.93	15.0708	1250	0.0120566	0.0520627
		0.1478	2480	369	2111	738	2849	0.259038	0.259038		0.9521	1243.44	7.56151	1235.88	15.123	1251	0.0120887	0.0522502
		0.1477	2480	370	2110	740	2850	0.259649	0.259649		0.9519	1244.41	7.58773	1236.82	15.1755	1252	0.012121	0.0524383
		0.1476	2480	371	2109	742	2851	0.26026	0.259895		0.9517	1245.39	7.61404	1237.77	15.2281	1253	0.0121533	0.0526271
		0.1475	2482	371	2111	742	2853	0.260077	0.259895		0.9516	1246.36	7.64045	1238.72	15.2809	1254	0.0121857	0.0528165
		0.1474	2483	371	2112	742	2854	0.259986	0.259895		0.9509	1247.33	7.66695	1239.67	15.3339	1255	0.0122182	0.0530067
		0.1473	2484	371	2113	742	2855	0.259895	0.259895		0.9508	1248.31	7.69355	1240.61	15.3871	1256	0.0122509	0.0531975
		0.1471	2485	372	2113	744	2857	0.260413	0.260322		0.9507	1249.28	7.72024	1241.56	15.4405	1257	0.0122836	0.053389
		0.147	2486	372	2114	744	2858	0.260322	0.260322		0.9505	1250.25	7.74704	1242.51	15.4941	1258	0.0123164	0.0537739
		0.1468	2486	373	2113	746	2859	0.26093	0.260566		0.9505	1251.23	7.77392	1243.45	15.5478	1259	0.0123494	0.0537739
		0.1467	2487	373	2114	746	2860	0.260839	0.260566		0.9505	1252.2	7.80091	1244.4	15.6018	1260	0.0123824	0.0537739
		0.1466	2490	373	2117	746	2863	0.260566	0.260566		0.9502	1253.17	7.82799	1245.34	15.656	1261	0.0124155	0.0541616
		0.1465	2490	375	2115	750	2865	0.26178	0.261597		0.9501	1254.14	7.85516	1246.29	15.7103	1262	0.0124488	0.0543565
		0.1464	2492	375	2117	750	2867	0.261597	0.261597		0.9499	1255.12	7.88244	1247.24	15.7649	1263	0.0124821	0.0545521
		0.1462	2492	376	2116	752	2868	0.262204	0.262204		0.9493	1256.09	7.90982	1248.18	15.8196	1264	0.0125155	0.0547483
		0.1459	2492	377	2115	754	2869	0.262809	0.262591		0.9492	1257.06	7.93729	1249.13	15.8746	1265	0.0125491	0.0549452
		0.1457	2493	378	2115	756	2871	0.263323	0.262591		0.9491	1258.04	7.96486	1250.07	15.9297	1266	0.0125827	0.0551429
		0.1456	2495	378	2117	756	2873	0.26314	0.262591		0.9479	1259.01	7.99253	1251.01	15.9851	1267	0.0126165	0.0553412
		0.1455	2496	378	2118	756	2874	0.263048	0.262591		0.9472	1259.98	8.0203	1251.96	16.0406	1268	0.0126503	0.05564
		0.1454	2499	378	2121	756	2877	0.262774	0.262591		0.9472	1260.95	8.04817	1252.9	16.0963	1269	0.0126843	0.05564
		0.1453	2500	378	2122	756	2878	0.262682	0.262591		0.947	1261.92	8.07614	1253.85	16.1523	1270	0.0127183	0.0559403
		0.1452	2501	378	2123	756	2879	0.262591	0.262591		0.9466	1262.9	8.10421	1254.79	16.2084	1271	0.0127525	0.0564444
		0.1451	2501	379	2122	758	2880	0.263194	0.263194		0.9466	1263.87	8.13238	1255.74	16.2648	1272	0.0127868	0.0564444
		0.145	2503	380	2123	760	2883	0.263614	0.263614		0.9466	1264.84	8.16066	1256.68	16.3213	1273	0.0128211	0.0564444
		0.1442	2503	381	2122	762	2884	0.264216	0.264216		0.9466	1265.81	8.18903	1257.62	16.3781	1274	0.0128556	0.0564444
		0.1435	2503	382	2121	764	2885	0.264818	0.264726		0.946	1266.78	8.21751	1258.56	16.435	1275	0.0128902	0.0570552
		0.1433	2504	382	2122	764	2886	0.264726	0.264726		0.946	1267.75	8.24609	1259.51	16.4922	1276	0.0129249	0.0570552
		0.1424	2504	383	2121	766	2887	0.265327	0.265327		0.9458	1268.73	8.27477	1260.45	16.5495	1277	0.0129597	0.057363
		0.142	2504	384	2120	768	2888	0.265928	0.265744		0.9453	1269.7	8.30355	1261.39	16.6071	1278	0.0129946	0.0575691
		0.1414	2505	384	2121	768	2889	0.265836	0.265744		0.9451	1270.67	8.33244	1262.34	16.6649	1279	0.0130296	0.0577759
		0.1413	2506	384	2122	768	2890	0.265744	0.265744		0.945	1271.64	8.36143	1263.28	16.7229	1280	0.0130647	0.0579834
		0.1412	2506	385	2121	770	2891	0.266344	0.266344		0.9444	1272.61	8.39053	1264.22	16.7811	1281	0.0131	0.0581917
		0.1411	2506	386	2120	772	2892	0.266943	0.266391		0.9437	1273.58	8.41973	1265.16	16.8395	1282	0.0131353	0.0585054
		0.141	2508	386	2122	772	2894	0.266759	0.266391		0.9437	1274.55	8.44903	1266.1	16.8981	1283	0.0131707	0.0585054
		0.1407	2509	386	2123	772	2895	0.266667	0.266391		0.9429	1275.52	8.47844	1267.04	16.9569	1284	0.0132063	0.0588208
		0.1406	2510	386	2124	772	2896	0.266575	0.266391		0.9426	1276.49	8.50796	1267.98	17.0159	1285	0.013242	0.0591378
		0.1404	2512	386	2126	772	2898	0.266391	0.266391		0.9426	1277.46	8.53758	1268.92	17.0752	1286	0.0132777	0.0591378
		0.1403	2512	387	2125	774	2899	0.266989	0.266897		0.9423	1278.43	8.56731	1269.87	17.1346	1287	0.0133136	0.0595631
		0.1401	2513	387	2126	774	2900	0.266897	0.266897		0.9423	1279.4	8.59714	1270.81	17.1943	1288	0.0133496	0.0595631
		0.1399	2513	388	2125	776	2901	0.267494	0.267034		0.9421	1280.37	8.62709	1271.75	17.2542	1289	0.0133857	0.0605308
		0.1398	2516	388	2128	776	2904	0.267218	0.267034		0.9421	1281.34	8.65714	1272.69	17.3143	1290	0.0134219	0.0605308
		0.1395	2518	388	2130	776	2906	0.267034	0.267034		0.9421	1282.31	8.68729	1273.63	17.3746	1291	0.0134582	0.0605308
		0.1394	2518	389	2129	778	2907	0.26763	0.26763		0.9421	1283.28	8.71756	1274.56	17.4351	1292	0.0134947	0.0605308
		0.1389	2519	390	2129	780	2909	0.268133	0.268133		0.9421	1284.25	8.74793	1275.5	17.4959	1293	0.0135312	0.0605308
		0.1387	2519	391	2128	782	2910	0.268729	0.268544		0.9421	1285.22	8.77842	1276.44	17.5568	1294	0.0135679	0.0605308
		0.1386	2520	391	2129	782	2911	0.268636	0.268544		0.9421	1286.19	8.80901	1277.38	17.618	1295	0.0136046	0.0605308
		0.1384	2521	391	2130	782	2912	0.268544	0.268544		0.9419	1287.16	8.83971	1278.32	17.6794	1296	0.0136415	0.0614037
		0.1383	2522	392	2130	784	2914	0.269046	0.268954		0.9416	1288.13	8.87052	1279.26	17.741	1297	0.0136785	0.0621775
		0.138	2523	392	2131	784	2915	0.268954	0.268954		0.9416	1289.1	8.90144	1280.2	17.8029	1298	0.0137156	0.0621775
		0.1379	2523	393	2130	786	2916	0.269547	0.269455		0.9416	1290.07	8.93248	1281.14	17.865	1299	0.0137529	0.0621775
		0.1376	2524	393	2131	786	2917	0.269455	0.269455		0.9416	1291.04	8.96362	1282.07	17.9272	1300	0.0137902	0.0621775
		0.1375	2524	394	2130	788	2918	0.270048	0.269955		0.9416	1292.01	8.99488	1283.01	17.9898	1301	0.0138276	0.0621775
		0.1374	2525	394	2131	788	2919	0.269955	0.269955		0.9416	1292.97	9.02624	1283.95	18.0525	1302	0.0138652	0.0621775
		0.1371	2525	395	2130	790	2920	0.270548	0.270548		0.9411	1293.94	9.05773	1284.88	18.1155	1303	0.0139029	0.0629606
		0.137	2525	396	2129	792	2921	0.27114	0.27114		0.9406	1294.91	9.08932	1285.82	18.1786	1304	0.0139407	0.0631861
		0.1367	2525	397	2128	794	2922	0.271732	0.271268		0.9402	1295.88	9.12102	1286.76	18.242	1305	0.0139786	0.0634123
		0.1366	2527	397	2130	794	2924	0.271546	0.271268		0.9399	1296.85	9.15284	1287.69	18.3057	1306	0.0140166	0.0636393
		0.1365	2529	397	2132	794	2926	0.27136	0.271268		0.9395	1297.82	9.18478	1288.63	18.3696	1307	0.0140547	0.0638671
		0.1364	2530	397	2133	794	2927	0.271268	0.271268		0.9383	1298.78	9.21683	1289.57	18.4337	1308	0.014093	0.0642103
		0.1363	2530	398	2132	796	2928	0.271858	0.271765		0.9383	1299.75	9.24899	1290.5	18.498	1309	0.0141314	0.0642103
		0.1361	2531	398	2133	796	2929	0.271765	0.271765		0.9382	1300.72	9.28127	1291.44	18.5625	1310	0.0141699	0.0645553
		0.1359	2531	399	2132	798	2930	0.272355	0.272355		0.9367	1301.69	9.31366	1292.37	18.6273	1311	0.0142085	0.064902
		0.1358	2531	401	2130	802	2932	0.273533	0.27344		0.9367	1302.65	9.34617	1293.31	18.6923	1312	0.0142472	0.064902
		0.1357	2532	401	2131	802	2933	0.27344	0.27344		0.9349	1303.62	9.37879	1294.24	18.7576	1313	0.0142861	0.0652505
		0.1356	2532	402	2130	804	2934	0.274029	0.274029		0.9348	1304.59	9.41154	1295.18	18.8231	1314	0.014325	0.0654838
		0.1352	2532	403	2129	806	2935	0.274617	0.274617		0.9346	1305.56	9.44439	1296.11	18.8888	1315	0.0143641	0.0657179
		0.1349	2532	404	2128	808	2936	0.275204	0.275111		0.9344	1306.52	9.47737	1297.05	18.9547	1316	0.0144033	0.0660706
		0.1348	2533	404	2129	808	2937	0.275111	0.275111		0.9344	1307.49	9.51046	1297.98	19.0209	1317	0.0144426	0.0660706
		0.1347	2533	405	2128	810	2938	0.275698	0.275698		0.9343	1308.46	9.54368	1298.91	19.0874	1318	0.0144821	0.0664251
		0.1345	2533	406	2127	812	2939	0.276284	0.27619		0.9329	1309.42	9.57701	1299.85	19.154	1319	0.0145216	0.0666624
		0.1341	2534	406	2128	812	2940	0.27619	0.27619		0.9322	1310.39	9.61046	1300.78	19.2209	1320	0.0145613	0.0669005
		0.1338	2535	407	2128	814	2942	0.276683	0.276495		0.932	1311.36	9.64403	1301.71	19.2881	1321	0.0146011	0.0671395
		0.1337	2536	407	2129	814	2943	0.276589	0.276495		0.93	1312.32	9.67772	1302.64	19.3554	1322	0.014641	0.0674994
		0.1336	2537	407	2130	814	2944	0.276495	0.276495		0.93	1313.29	9.71153	1303.58	19.4231	1323	0.0146811	0.0674994
		0.1334	2537	408	2129	816	2945	0.27708	0.276986		0.9298	1314.25	9.74546	1304.51	19.4909	1324	0.0147212	0.0678612
		0.1333	2538	408	2130	816	2946	0.276986	0.276986		0.9295	1315.22	9.77951	1305.44	19.559	1325	0.0147615	0.0681034
		0.133	2539	409	2130	818	2948	0.277476	0.277476		0.929	1316.19	9.81368	1306.37	19.6274	1326	0.0148019	0.0683464
		0.1327	2539	412	2127	824	2951	0.279227	0.279133		0.9279	1317.15	9.84798	1307.3	19.696	1327	0.0148425	0.0685903
		0.1321	2540	412	2128	824	2952	0.279133	0.279133		0.9271	1318.12	9.8824	1308.24	19.7648	1328	0.0148831	0.068835
		0.1319	2540	413	2127	826	2953	0.279716	0.279432		0.9269	1319.08	9.91694	1309.17	19.8339	1329	0.0149239	0.0692035
		0.1318	2541	413	2128	826	2954	0.279621	0.279432		0.9269	1320.05	9.9516	1310.1	19.9032	1330	0.0149648	0.0692035
		0.1317	2543	413	2130	826	2956	0.279432	0.279432		0.9266	1321.01	9.98639	1311.03	19.9728	1331	0.0150058	0.069574
		0.1315	2544	414	2130	828	2958	0.279919	0.279541		0.9264	1321.98	10.0213	1311.96	20.0426	1332	0.015047	0.069822
		0.1314	2545	414	2131	828	2959	0.279824	0.279541		0.9261	1322.94	10.0563	1312.89	20.1127	1333	0.0150883	0.0700708
		0.1309	2546	414	2132	828	2960	0.27973	0.279541		0.9259	1323.91	10.0915	1313.82	20.183	1334	0.0151297	0.0703205
		0.1307	2548	414	2134	828	2962	0.279541	0.279541		0.9258	1324.87	10.1268	1314.75	20.2536	1335	0.0151712	0.070571
		0.1306	2548	415	2133	830	2963	0.280121	0.280121		0.9253	1325.84	10.1622	1315.68	20.3244	1336	0.0152129	0.0708223
		0.1305	2549	416	2133	832	2965	0.280607	0.280512		0.9244	1326.8	10.1977	1316.6	20.3955	1337	0.0152546	0.0710745
		0.1304	2550	416	2134	832	2966	0.280512	0.280512		0.9243	1327.77	10.2334	1317.53	20.4668	1338	0.0152965	0.0713276
		0.1303	2550	417	2133	834	2967	0.281092	0.280997		0.9241	1328.73	10.2692	1318.46	20.5384	1339	0.0153386	0.0715815
		0.1302	2551	417	2134	834	2968	0.280997	0.280997		0.9234	1329.69	10.3051	1319.39	20.6102	1340	0.0153807	0.0718363
		0.1301	2551	418	2133	836	2969	0.281576	0.281576		0.9232	1330.66	10.3411	1320.32	20.6823	1341	0.015423	0.0720919
		0.1299	2551	419	2132	838	2970	0.282155	0.281965		0.9227	1331.62	10.3773	1321.25	20.7546	1342	0.0154655	0.0723483
		0.1296	2552	419	2133	838	2971	0.28206	0.281965		0.9216	1332.59	10.4136	1322.17	20.8272	1343	0.015508	0.0726056
		0.1294	2553	419	2134	838	2972	0.281965	0.281965		0.9207	1333.55	10.4501	1323.1	20.9001	1344	0.0155507	0.0728638
		0.1293	2553	420	2133	840	2973	0.282543	0.282543		0.9181	1334.51	10.4866	1324.03	20.9732	1345	0.0155935	0.0732527
		0.1292	2553	422	2131	844	2975	0.283697	0.283697		0.9181	1335.48	10.5233	1324.95	21.0466	1346	0.0156364	0.0732527
		0.1291	2553	423	2130	846	2976	0.284274	0.284274		0.9175	1336.44	10.5601	1325.88	21.1203	1347	0.0156795	0.0736436
		0.1289	2553	424	2129	848	2977	0.284851	0.284659		0.9172	1337.4	10.5971	1326.81	21.1942	1348	0.0157227	0.0739052
		0.1288	2555	424	2131	848	2979	0.284659	0.284659		0.9167	1338.37	10.6342	1327.73	21.2683	1349	0.015766	0.0741677
		0.1287	2556	425	2131	850	2981	0.285139	0.285045		0.916	1339.33	10.6714	1328.66	21.3428	1350	0.0158095	0.0744311
		0.1285	2560	426	2134	852	2986	0.285332	0.285045		0.9156	1340.29	10.7087	1329.58	21.4175	1351	0.015853	0.0746954
		0.1284	2561	426	2135	852	2987	0.285236	0.285045		0.915	1341.25	10.7462	1330.51	21.4924	1352	0.0158968	0.0750935
		0.1283	2563	426	2137	852	2989	0.285045	0.285045		0.915	1342.22	10.7838	1331.43	21.5676	1353	0.0159406	0.0750935
		0.1282	2563	427	2136	854	2990	0.285619	0.285523		0.9149	1343.18	10.8216	1332.36	21.6431	1354	0.0159846	0.0754935
		0.128	2564	427	2137	854	2991	0.285523	0.285523		0.914	1344.14	10.8595	1333.28	21.7189	1355	0.0160287	0.0757613
		0.1279	2564	428	2136	856	2992	0.286096	0.286001		0.9139	1345.1	10.8975	1334.21	21.7949	1356	0.016073	0.07603
		0.1278	2565	428	2137	856	2993	0.286001	0.286001		0.9135	1346.06	10.9356	1335.13	21.8712	1357	0.0161173	0.07657
		0.1277	2566	429	2137	858	2995	0.286477	0.286286		0.9135	1347.03	10.9739	1336.05	21.9478	1358	0.0161619	0.07657
		0.1276	2568	429	2139	858	2997	0.286286	0.286286		0.9135	1347.99	11.0123	1336.98	22.0246	1359	0.0162065	0.07657
		0.1275	2574	432	2142	864	3006	0.287425	0.287425		0.9117	1348.95	11.0509	1337.9	22.1018	1360	0.0162513	0.0771137
		0.1274	2623	467	2156	934	3090	0.302265	0.302168		0.9104	1349.91	11.0896	1338.82	22.1791	1361	0.0162962	0.0773868
		0.1272	2624	467	2157	934	3091	0.302168	0.302168		0.9099	1350.87	11.1284	1339.74	22.2568	1362	0.0163413	0.0776609
		0.127	2624	468	2156	936	3092	0.302717	0.302717		0.9094	1351.83	11.1674	1340.67	22.3347	1363	0.0163865	0.0779359
		0.1266	2624	469	2155	938	3093	0.303265	0.303265		0.9091	1352.79	11.2065	1341.59	22.413	1364	0.0164318	0.0782117
		0.1259	2624	471	2153	942	3095	0.304362	0.304362		0.9084	1353.75	11.2457	1342.51	22.4914	1365	0.0164772	0.0784885
		0.1257	2624	472	2152	944	3096	0.30491	0.304811		0.9071	1354.71	11.2851	1343.43	22.5702	1366	0.0165228	0.0787662
		0.1256	2625	472	2153	944	3097	0.304811	0.304811		0.9069	1355.68	11.3246	1344.35	22.6493	1367	0.0165686	0.0790448
		0.1255	2625	473	2152	946	3098	0.305358	0.30526		0.9048	1356.64	11.3643	1345.27	22.7286	1368	0.0166145	0.0793243
		0.1253	2626	473	2153	946	3099	0.30526	0.30526		0.9045	1357.6	11.4041	1346.19	22.8082	1369	0.0166605	0.0796048
		0.1252	2626	474	2152	948	3100	0.305806	0.305609		0.9042	1358.56	11.444	1347.11	22.8881	1370	0.0167066	0.0798861
		0.1248	2627	474	2153	948	3101	0.305708	0.305609		0.9025	1359.52	11.4841	1348.03	22.9682	1371	0.0167529	0.0801684
		0.1247	2628	474	2154	948	3102	0.305609	0.305609		0.9023	1360.48	11.5243	1348.95	23.0487	1372	0.0167993	0.0804516
		0.1246	2628	475	2153	950	3103	0.306155	0.306155		0.902	1361.44	11.5647	1349.87	23.1294	1373	0.0168459	0.0807357
		0.1245	2628	477	2151	954	3105	0.307246	0.307246		0.8977	1362.39	11.6052	1350.79	23.2104	1374	0.0168926	0.0810208
		0.124	2629	479	2150	958	3108	0.308237	0.308138		0.8974	1363.35	11.6459	1351.71	23.2918	1375	0.0169395	0.0813067
		0.1239	2630	479	2151	958	3109	0.308138	0.308138		0.8972	1364.31	11.6867	1352.63	23.3733	1376	0.0169864	0.0815937
		0.1237	2630	480	2150	960	3110	0.308682	0.308682		0.8969	1365.27	11.7276	1353.54	23.4552	1377	0.0170336	0.0818815
		0.1234	2630	481	2149	962	3111	0.309225	0.308828		0.8959	1366.23	11.7687	1354.46	23.5374	1378	0.0170808	0.082315
		0.123	2631	481	2150	962	3112	0.309126	0.308828		0.8959	1367.19	11.8099	1355.38	23.6199	1379	0.0171282	0.082315
		0.1227	2633	481	2152	962	3114	0.308927	0.308828		0.8957	1368.15	11.8513	1356.3	23.7026	1380	0.0171758	0.0827507
		0.1225	2634	481	2153	962	3115	0.308828	0.308828		0.8954	1369.11	11.8928	1357.21	23.7856	1381	0.0172235	0.0830423
		0.1224	2634	482	2152	964	3116	0.309371	0.309173		0.8948	1370.07	11.9345	1358.13	23.869	1382	0.0172713	0.0833349
		0.1223	2636	482	2154	964	3118	0.309173	0.309173		0.8933	1371.02	11.9763	1359.05	23.9526	1383	0.0173193	0.0836284
		0.1221	2636	483	2153	966	3119	0.309715	0.309516		0.8928	1371.98	12.0183	1359.96	24.0365	1384	0.0173674	0.0839228
		0.1217	2637	483	2154	966	3120	0.309615	0.309516		0.8922	1372.94	12.0604	1360.88	24.1208	1385	0.0174157	0.0842182
		0.1216	2638	483	2155	966	3121	0.309516	0.309516		0.8913	1373.9	12.1026	1361.79	24.2053	1386	0.0174641	0.0845146
		0.1211	2638	484	2154	968	3122	0.310058	0.309859		0.8907	1374.85	12.145	1362.71	24.2901	1387	0.0175127	0.0848119
		0.1209	2640	484	2156	968	3124	0.309859	0.309859		0.8905	1375.81	12.1876	1363.62	24.3752	1388	0.0175614	0.0854095
		0.1207	2640	485	2155	970	3125	0.3104	0.310301		0.8905	1376.77	12.2303	1364.54	24.4606	1389	0.0176102	0.0854095
		0.1206	2641	485	2156	970	3126	0.310301	0.310301		0.8905	1377.73	12.2732	1365.45	24.5463	1390	0.0176592	0.0854095
		0.1205	2641	486	2155	972	3127	0.310841	0.310742		0.8895	1378.68	12.3162	1366.37	24.6323	1391	0.0177084	0.0860108
		0.1204	2642	486	2156	972	3128	0.310742	0.310742		0.8882	1379.64	12.3593	1367.28	24.7186	1392	0.0177576	0.086313
		0.1202	2643	488	2155	976	3131	0.311721	0.311423		0.8867	1380.6	12.4026	1368.19	24.8052	1393	0.0178071	0.0866161
		0.12	2644	488	2156	976	3132	0.311622	0.311423		0.8863	1381.55	12.4461	1369.11	24.8922	1394	0.0178566	0.0869202
		0.1199	2645	488	2157	976	3133	0.311523	0.311423		0.8859	1382.51	12.4897	1370.02	24.9794	1395	0.0179064	0.0872252
		0.1195	2646	488	2158	976	3134	0.311423	0.311423		0.8853	1383.47	12.5335	1370.93	25.0669	1396	0.0179563	0.0875313
		0.1194	2646	490	2156	980	3136	0.3125	0.312301		0.8839	1384.42	12.5774	1371.85	25.1548	1397	0.0180063	0.0878383
		0.1192	2647	490	2157	980	3137	0.3124	0.312301		0.8832	1385.38	12.6215	1372.76	25.2429	1398	0.0180564	0.0881463
		0.1191	2648	490	2158	980	3138	0.312301	0.312301		0.8829	1386.33	12.6657	1373.67	25.3314	1399	0.0181068	0.0884553
		0.1187	2648	491	2157	982	3139	0.312838	0.312739		0.8811	1387.29	12.7101	1374.58	25.4201	1400	0.0181572	0.0887652
		0.1185	2649	491	2158	982	3140	0.312739	0.312739		0.8802	1388.25	12.7546	1375.49	25.5092	1401	0.0182079	0.0890762
		0.1184	2649	492	2157	984	3141	0.313276	0.313077		0.8801	1389.2	12.7993	1376.4	25.5986	1402	0.0182586	0.0893881
		0.1183	2650	492	2158	984	3142	0.313176	0.313077		0.88	1390.16	12.8441	1377.31	25.6883	1403	0.0183095	0.0898579
		0.1182	2651	492	2159	984	3143	0.313077	0.313077		0.88	1391.11	12.8892	1378.22	25.7783	1404	0.0183606	0.0898579
		0.118	2652	493	2159	986	3145	0.313514	0.313414		0.8798	1392.07	12.9343	1379.13	25.8686	1405	0.0184118	0.0903299
		0.1179	2653	493	2160	986	3146	0.313414	0.313414		0.8796	1393.02	12.9796	1380.04	25.9593	1406	0.0184632	0.0906458
		0.1178	2653	494	2159	988	3147	0.31395	0.313452		0.8793	1393.97	13.0251	1380.95	26.0503	1407	0.0185147	0.0909628
		0.1177	2654	494	2160	988	3148	0.31385	0.313452		0.8786	1394.93	13.0708	1381.86	26.1415	1408	0.0185664	0.0912807
		0.1175	2655	494	2161	988	3149	0.31375	0.313452		0.8781	1395.88	13.1166	1382.77	26.2331	1409	0.0186183	0.0915996
		0.1174	2656	494	2162	988	3150	0.313651	0.313452		0.8771	1396.84	13.1625	1383.67	26.3251	1410	0.0186702	0.0919196
		0.117	2658	494	2164	988	3152	0.313452	0.313452		0.8766	1397.79	13.2086	1384.58	26.4173	1411	0.0187224	0.0922405
		0.1169	2658	495	2163	990	3153	0.313987	0.313887		0.8752	1398.75	13.2549	1385.49	26.5099	1412	0.0187747	0.0925625
		0.1168	2659	495	2164	990	3154	0.313887	0.313887		0.8745	1399.7	13.3014	1386.4	26.6027	1413	0.0188271	0.0928855
		0.1165	2659	498	2161	996	3157	0.315489	0.31529		0.8744	1400.65	13.348	1387.3	26.6959	1414	0.0188797	0.0932095
		0.1164	2660	498	2162	996	3158	0.315389	0.31529		0.8721	1401.61	13.3947	1388.21	26.7895	1415	0.0189325	0.0935345
		0.1163	2661	498	2163	996	3159	0.31529	0.31529		0.872	1402.56	13.4417	1389.12	26.8833	1416	0.0189854	0.0938605
		0.1162	2661	499	2162	998	3160	0.315823	0.315623		0.8714	1403.51	13.4888	1390.02	26.9775	1417	0.0190385	0.0941876
		0.116	2662	499	2163	998	3161	0.315723	0.315623		0.8713	1404.46	13.536	1390.93	27.072	1418	0.0190917	0.0945157
		0.1159	2663	499	2164	998	3162	0.315623	0.315623		0.8682	1405.42	13.5834	1391.83	27.1669	1419	0.0191451	0.0950097
		0.1158	2663	500	2163	1000	3163	0.316156	0.315889		0.8682	1406.37	13.631	1392.74	27.2621	1420	0.0191986	0.0950097
		0.1157	2664	500	2164	1000	3164	0.316056	0.315889		0.8679	1407.32	13.6788	1393.64	27.3576	1421	0.0192523	0.0955061
		0.1155	2664	501	2163	1002	3165	0.316588	0.315889		0.8661	1408.27	13.7267	1394.55	27.4534	1422	0.0193062	0.0958383
		0.1153	2665	501	2164	1002	3166	0.316488	0.315889		0.8655	1409.23	13.7748	1395.45	27.5496	1423	0.0193602	0.0963386
		0.1151	2666	501	2165	1002	3167	0.316388	0.315889		0.8655	1410.18	13.823	1396.35	27.6461	1424	0.0194144	0.0963386
		0.115	2667	501	2166	1002	3168	0.316288	0.315889		0.8647	1411.13	13.8715	1397.26	27.7429	1425	0.0194687	0.0968412
		0.1146	2670	501	2169	1002	3171	0.315989	0.315889		0.8642	1412.08	13.9201	1398.16	27.8401	1426	0.0195232	0.0973461
		0.1142	2671	501	2170	1002	3172	0.315889	0.315889		0.8642	1413.03	13.9688	1399.06	27.9376	1427	0.0195779	0.0973461
		0.1137	2671	503	2168	1006	3174	0.31695	0.316651		0.8633	1413.98	14.0177	1399.96	28.0355	1428	0.0196327	0.0978534
		0.1136	2672	503	2169	1006	3175	0.31685	0.316651		0.8626	1414.93	14.0668	1400.87	28.1337	1429	0.0196877	0.0981929
		0.1135	2673	503	2170	1006	3176	0.316751	0.316651		0.8616	1415.88	14.1161	1401.77	28.2322	1430	0.0197428	0.0987041
		0.1134	2674	503	2171	1006	3177	0.316651	0.316651		0.8616	1416.83	14.1655	1402.67	28.3311	1431	0.0197981	0.0987041
		0.1132	2674	506	2168	1012	3180	0.318239	0.31764		0.8609	1417.78	14.2151	1403.57	28.4303	1432	0.0198536	0.0993894
		0.1129	2675	506	2169	1012	3181	0.318139	0.31764		0.8609	1418.74	14.2649	1404.47	28.5299	1433	0.0199092	0.0993894
		0.1128	2676	506	2170	1012	3182	0.318039	0.31764		0.8601	1419.69	14.3149	1405.37	28.6298	1434	0.019965	0.0999062
		0.1126	2678	506	2172	1012	3184	0.317839	0.31764		0.8593	1420.63	14.365	1406.27	28.73	1435	0.0200209	0.100252
		0.1124	2680	506	2174	1012	3186	0.31764	0.31764		0.8577	1421.58	14.4153	1407.17	28.8306	1436	0.020077	0.100599
		0.1123	2680	508	2172	1016	3188	0.318695	0.318695		0.856	1422.53	14.4658	1408.07	28.9316	1437	0.0201333	0.100947
		0.1121	2681	509	2172	1018	3190	0.319122	0.319122		0.8543	1423.48	14.5164	1408.97	29.0329	1438	0.0201897	0.101296
		0.112	2681	510	2171	1020	3191	0.319649	0.319649		0.8529	1424.43	14.5673	1409.87	29.1345	1439	0.0202464	0.101646
		0.1119	2681	511	2170	1022	3192	0.320175	0.320175		0.8527	1425.38	14.6183	1410.76	29.2365	1440	0.0203031	0.101997
		0.1118	2681	513	2168	1026	3194	0.321227	0.321227		0.8526	1426.33	14.6694	1411.66	29.3389	1441	0.0203601	0.102349
		0.1115	2681	514	2167	1028	3195	0.321753	0.321753		0.8525	1427.28	14.7208	1412.56	29.4416	1442	0.0204172	0.103057
		0.1112	2681	515	2166	1030	3196	0.322278	0.322278		0.8525	1428.23	14.7723	1413.46	29.5446	1443	0.0204744	0.103057
		0.1111	2681	516	2165	1032	3197	0.322803	0.322702		0.8525	1429.18	14.824	1414.35	29.648	1444	0.0205319	0.103057
		0.111	2682	516	2166	1032	3198	0.322702	0.322702		0.8521	1430.12	14.8759	1415.25	29.7518	1445	0.0205895	0.103769
		0.1109	2682	517	2165	1034	3199	0.323226	0.323024		0.8493	1431.07	14.928	1416.14	29.8559	1446	0.0206472	0.104127
		0.1108	2683	517	2166	1034	3200	0.323125	0.323024		0.849	1432.02	14.9802	1417.04	29.9604	1447	0.0207052	0.104486
		0.1106	2684	517	2167	1034	3201	0.323024	0.323024		0.8469	1432.97	15.0326	1417.93	30.0653	1448	0.0207633	0.104845
		0.1105	2685	518	2167	1036	3203	0.323447	0.323447		0.8463	1433.91	15.0852	1418.83	30.1705	1449	0.0208216	0.105206
		0.1103	2686	519	2167	1038	3205	0.323869	0.323869		0.8454	1434.86	15.138	1419.72	30.276	1450	0.02088	0.105568
		0.1102	2687	520	2167	1040	3207	0.324291	0.324291		0.8438	1435.81	15.191	1420.62	30.382	1451	0.0209386	0.105931
		0.1099	2688	521	2167	1042	3209	0.324712	0.324712		0.8436	1436.76	15.2441	1421.51	30.4883	1452	0.0209974	0.106296
		0.1098	2689	522	2167	1044	3211	0.325132	0.325031		0.8435	1437.7	15.2975	1422.41	30.5949	1453	0.0210564	0.106661
		0.1097	2690	522	2168	1044	3212	0.325031	0.325031		0.8432	1438.65	15.351	1423.3	30.7019	1454	0.0211155	0.107027
		0.1096	2690	523	2167	1046	3213	0.325552	0.325552		0.8421	1439.6	15.4047	1424.19	30.8093	1455	0.0211748	0.107395
		0.1095	2692	524	2168	1048	3216	0.325871	0.325871		0.8419	1440.54	15.4585	1425.08	30.9171	1456	0.0212343	0.107763
		0.1093	2692	525	2167	1050	3217	0.326391	0.326391		0.8406	1441.49	15.5126	1425.97	31.0252	1457	0.0212939	0.108318
		0.1091	2693	526	2167	1052	3219	0.32681	0.32681		0.8406	1442.43	15.5669	1426.87	31.1337	1458	0.0213537	0.108318
		0.109	2695	527	2168	1054	3222	0.327126	0.327126		0.8383	1443.38	15.6213	1427.76	31.2426	1459	0.0214137	0.108876
		0.1089	2695	528	2167	1056	3223	0.327645	0.327543		0.8382	1444.32	15.6759	1428.65	31.3519	1460	0.0214739	0.109249
		0.1088	2696	528	2168	1056	3224	0.327543	0.327543		0.838	1445.27	15.7307	1429.54	31.4615	1461	0.0215342	0.10981
		0.1087	2696	529	2167	1058	3225	0.328062	0.328062		0.838	1446.21	15.7857	1430.43	31.5715	1462	0.0215947	0.10981
		0.1086	2696	530	2166	1060	3226	0.32858	0.32858		0.8369	1447.16	15.8409	1431.32	31.6819	1463	0.0216554	0.110374
		0.1085	2697	531	2166	1062	3228	0.328996	0.328996		0.8367	1448.1	15.8963	1432.21	31.7926	1464	0.0217163	0.110752
		0.1084	2697	532	2165	1064	3229	0.329514	0.329412		0.8365	1449.05	15.9519	1433.1	31.9037	1465	0.0217773	0.11113
		0.1083	2698	532	2166	1064	3230	0.329412	0.329412		0.8344	1449.99	16.0076	1433.98	32.0152	1466	0.0218385	0.11151
		0.1082	2699	533	2166	1066	3232	0.329827	0.329827		0.8342	1450.94	16.0636	1434.87	32.1271	1467	0.0218999	0.111891
		0.1081	2699	534	2165	1068	3233	0.330343	0.330037		0.8296	1451.88	16.1197	1435.76	32.2394	1468	0.0219615	0.112273
		0.1079	2701	534	2167	1068	3235	0.330139	0.330037		0.8279	1452.82	16.176	1436.65	32.3521	1469	0.0220232	0.112656
		0.1078	2702	534	2168	1068	3236	0.330037	0.330037		0.8273	1453.77	16.2326	1437.53	32.4651	1470	0.0220851	0.11304
		0.1077	2702	535	2167	1070	3237	0.330553	0.330145		0.8272	1454.71	16.2893	1438.42	32.5785	1471	0.0221472	0.113619
		0.1075	2705	535	2170	1070	3240	0.330247	0.330145		0.8272	1455.65	16.3462	1439.31	32.6923	1472	0.0222095	0.113619
		0.1074	2706	535	2171	1070	3241	0.330145	0.330145		0.8267	1456.6	16.4033	1440.19	32.8065	1473	0.0222719	0.1142
		0.1073	2706	537	2169	1074	3243	0.331175	0.331175		0.8251	1457.54	16.4606	1441.08	32.9211	1474	0.0223346	0.114783
		0.1072	2707	538	2169	1076	3245	0.331587	0.331383		0.8251	1458.48	16.5181	1441.96	33.0361	1475	0.0223974	0.114783
		0.1071	2709	538	2171	1076	3247	0.331383	0.331383		0.8245	1459.42	16.5757	1442.85	33.1515	1476	0.0224604	0.115565
		0.107	2710	539	2171	1078	3249	0.331794	0.331794		0.8245	1460.37	16.6336	1443.73	33.2672	1477	0.0225235	0.115565
		0.1069	2712	540	2172	1080	3252	0.332103	0.332001		0.8228	1461.31	16.6917	1444.62	33.3834	1478	0.0225869	0.116155
		0.1068	2713	540	2173	1080	3253	0.332001	0.332001		0.8227	1462.25	16.75	1445.5	33.4999	1479	0.0226504	0.11655
		0.1067	2713	541	2172	1082	3254	0.332514	0.332514		0.8219	1463.19	16.8084	1446.38	33.6169	1480	0.0227141	0.116945
		0.1066	2713	542	2171	1084	3255	0.333026	0.332924		0.8209	1464.13	16.8671	1447.27	33.7342	1481	0.022778	0.117342
		0.1065	2714	542	2172	1084	3256	0.332924	0.332924		0.8204	1465.07	16.926	1448.15	33.852	1482	0.0228421	0.11774
		0.1063	2717	543	2174	1086	3260	0.333129	0.332925		0.8192	1466.01	16.9851	1449.03	33.9701	1483	0.0229063	0.118339
		0.1062	2718	543	2175	1086	3261	0.333027	0.332925		0.8192	1466.96	17.0443	1449.91	34.0887	1484	0.0229708	0.118339
		0.1061	2719	543	2176	1086	3262	0.332925	0.332925		0.8187	1467.9	17.1038	1450.79	34.2076	1485	0.0230354	0.118941
		0.106	2719	544	2175	1088	3263	0.333435	0.333129		0.818	1468.84	17.1635	1451.67	34.3269	1486	0.0231002	0.119343
		0.1059	2722	544	2178	1088	3266	0.333129	0.333129		0.8159	1469.78	17.2233	1452.55	34.4467	1487	0.0231652	0.119747
		0.1058	2722	545	2177	1090	3267	0.333639	0.333639		0.8149	1470.72	17.2834	1453.43	34.5668	1488	0.0232304	0.120152
		0.1057	2723	546	2177	1092	3269	0.334047	0.334047		0.8146	1471.66	17.3437	1454.31	34.6874	1489	0.0232958	0.120558
		0.1056	2724	548	2176	1096	3272	0.334963	0.334759		0.8136	1472.6	17.4042	1455.19	34.8084	1490	0.0233613	0.120965
		0.1055	2725	548	2177	1096	3273	0.334861	0.334759		0.8109	1473.54	17.4649	1456.07	34.9297	1491	0.0234271	0.121373
		0.1054	2726	548	2178	1096	3274	0.334759	0.334759		0.8105	1474.47	17.5258	1456.95	35.0515	1492	0.023493	0.121783
		0.1053	2728	550	2178	1100	3278	0.33557	0.33557		0.8104	1475.41	17.5869	1457.83	35.1737	1493	0.0235591	0.122194
		0.1052	2729	552	2177	1104	3281	0.336483	0.336483		0.81	1476.35	17.6482	1458.7	35.2963	1494	0.0236254	0.122605
		0.1051	2733	554	2179	1108	3287	0.337085	0.337085		0.807	1477.29	17.7097	1459.58	35.4193	1495	0.0236919	0.123019
		0.105	2764	578	2186	1156	3342	0.345901	0.345694		0.8067	1478.23	17.7714	1460.46	35.5428	1496	0.0237585	0.123433
		0.1049	2766	578	2188	1156	3344	0.345694	0.345694		0.8046	1479.17	17.8333	1461.33	35.6666	1497	0.0238254	0.124265
		0.1048	2766	579	2187	1158	3345	0.346188	0.346188		0.8046	1480.1	17.8954	1462.21	35.7909	1498	0.0238924	0.124265
		0.1047	2766	581	2185	1162	3347	0.347177	0.347177		0.8046	1481.04	17.9578	1463.08	35.9156	1499	0.0239597	0.124265
		0.1046	2767	582	2185	1164	3349	0.347566	0.347566		0.8036	1481.98	18.0203	1463.96	36.0407	1500	0.0240271	0.125522
		0.1045	2770	583	2187	1166	3353	0.347748	0.347723		0.8036	1482.92	18.0831	1464.83	36.1662	1501	0.0240947	0.125522
		0.1044	2770	584	2186	1168	3354	0.348241	0.347723		0.8036	1483.85	18.1461	1465.71	36.2921	1502	0.0241625	0.125522
		0.1043	2772	584	2188	1168	3356	0.348033	0.347723		0.8035	1484.79	18.2092	1466.58	36.4185	1503	0.0242305	0.126365
		0.1042	2774	584	2190	1168	3358	0.347826	0.347723		0.8019	1485.73	18.2726	1467.45	36.5453	1504	0.0242987	0.126789
		0.1041	2775	584	2191	1168	3359	0.347723	0.347723		0.8013	1486.66	18.3362	1468.33	36.6725	1505	0.0243671	0.127214
		0.104	2777	585	2192	1170	3362	0.348007	0.347878		0.8	1487.6	18.4001	1469.2	36.8001	1506	0.0244357	0.12764
		0.1039	2780	586	2194	1172	3366	0.348188	0.347878		0.799	1488.54	18.4641	1470.07	36.9282	1507	0.0245044	0.128067
		0.1038	2783	586	2197	1172	3369	0.347878	0.347878		0.7979	1489.47	18.5284	1470.94	37.0567	1508	0.0245734	0.128496
		0.1037	2784	587	2197	1174	3371	0.348265	0.348265		0.7977	1490.41	18.5928	1471.81	37.1856	1509	0.0246426	0.128925
		0.1036	2789	589	2200	1178	3378	0.348727	0.348727		0.7975	1491.34	18.6575	1472.69	37.315	1510	0.0247119	0.129356
		0.1035	2791	590	2201	1180	3381	0.349009	0.349009		0.7946	1492.28	18.7224	1473.56	37.4448	1511	0.0247814	0.129788
		0.1034	2794	591	2203	1182	3385	0.349188	0.349188		0.7945	1493.21	18.7875	1474.43	37.575	1512	0.0248512	0.130222
		0.1033	2795	592	2203	1184	3387	0.349572	0.349469		0.7931	1494.15	18.8528	1475.29	37.7056	1513	0.0249211	0.130656
		0.1032	2796	592	2204	1184	3388	0.349469	0.349469		0.7927	1495.08	18.9184	1476.16	37.8367	1514	0.0249912	0.131092
		0.1031	2796	595	2201	1190	3391	0.350929	0.350929		0.7908	1496.02	18.9841	1477.03	37.9683	1515	0.0250616	0.131747
		0.103	2799	597	2202	1194	3396	0.35159	0.35159		0.7908	1496.95	19.0501	1477.9	38.1002	1516	0.0251321	0.131747
		0.1029	2802	599	2203	1198	3401	0.352249	0.352249		0.7901	1497.88	19.1163	1478.77	38.2326	1517	0.0252028	0.132406
		0.1028	2802	601	2201	1202	3403	0.353218	0.353044		0.7886	1498.82	19.1827	1479.63	38.3655	1518	0.0252737	0.132846
		0.1027	2803	602	2201	1204	3405	0.353598	0.353044		0.7876	1499.75	19.2494	1480.5	38.4988	1519	0.0253448	0.133509
		0.1026	2805	603	2202	1206	3408	0.353873	0.353044		0.7876	1500.68	19.3163	1481.37	38.6325	1520	0.0254161	0.133509
		0.1025	2813	603	2210	1206	3416	0.353044	0.353044		0.7862	1501.62	19.3833	1482.23	38.7667	1521	0.0254876	0.134175
		0.1024	2814	605	2209	1210	3419	0.353905	0.353905		0.7853	1502.55	19.4507	1483.1	38.9013	1522	0.0255593	0.13462
		0.1023	2816	608	2208	1216	3424	0.35514	0.35514		0.784	1503.48	19.5182	1483.96	39.0364	1523	0.0256312	0.135067
		0.1022	2838	621	2217	1242	3459	0.359063	0.359063		0.7826	1504.41	19.5859	1484.83	39.1719	1524	0.0257033	0.135514
		0.1021	2867	643	2224	1286	3510	0.366382	0.366382		0.7805	1505.35	19.6539	1485.69	39.3078	1525	0.0257756	0.135963
		0.102	2867	644	2223	1288	3511	0.366847	0.366827		0.7793	1506.28	19.7221	1486.56	39.4443	1526	0.0258481	0.136639
		0.1019	2871	646	2225	1292	3517	0.367359	0.366827		0.7793	1507.21	19.7906	1487.42	39.5811	1527	0.0259208	0.136639
		0.1018	2872	646	2226	1292	3518	0.367254	0.366827		0.7772	1508.14	19.8592	1488.28	39.7184	1528	0.0259937	0.137318
		0.1017	2875	647	2228	1294	3522	0.367405	0.366827		0.7753	1509.07	19.9281	1489.14	39.8562	1529	0.0260668	0.137771
		0.1016	2879	648	2231	1296	3527	0.367451	0.366827		0.7751	1510	19.9972	1490.01	39.9944	1530	0.0261402	0.138683
		0.1015	2882	648	2234	1296	3530	0.367139	0.366827		0.7751	1510.93	20.0666	1490.87	40.1331	1531	0.0262137	0.138683
		0.1014	2885	648	2237	1296	3533	0.366827	0.366827		0.7751	1511.86	20.1361	1491.73	40.2723	1532	0.0262874	0.138683
		0.1013	2886	649	2237	1298	3535	0.367185	0.367185		0.7746	1512.79	20.2059	1492.59	40.4119	1533	0.0263613	0.139599
		0.1012	2887	652	2235	1304	3539	0.368466	0.368466		0.7741	1513.72	20.276	1493.45	40.5519	1534	0.0264354	0.140059
		0.1011	2888	654	2234	1308	3542	0.369283	0.369283		0.7698	1514.65	20.3462	1494.31	40.6924	1535	0.0265097	0.14052
		0.101	2891	656	2235	1312	3547	0.36989	0.369473		0.766	1515.58	20.4167	1495.17	40.8334	1536	0.0265843	0.140983
		0.1009	2894	656	2238	1312	3550	0.369577	0.369473		0.765	1516.51	20.4874	1496.03	40.9749	1537	0.026659	0.141446
		0.1008	2895	656	2239	1312	3551	0.369473	0.369473		0.7606	1517.44	20.5584	1496.88	41.1168	1538	0.0267339	0.141911
		0.1007	2896	657	2239	1314	3553	0.369828	0.369516		0.7601	1518.37	20.6296	1497.74	41.2592	1539	0.0268091	0.142611
		0.1006	2897	657	2240	1314	3554	0.369724	0.369516		0.7601	1519.3	20.701	1498.6	41.402	1540	0.0268844	0.142611
		0.1005	2899	657	2242	1314	3556	0.369516	0.369516		0.76	1520.23	20.7727	1499.45	41.5453	1541	0.02696	0.143313
		0.1004	2901	659	2242	1318	3560	0.370225	0.370225		0.7587	1521.16	20.8445	1500.31	41.6891	1542	0.0270357	0.143783
		0.1003	2903	662	2241	1324	3565	0.371388	0.371388		0.7578	1522.08	20.9167	1501.17	41.8334	1543	0.0271117	0.14449
		0.1002	2907	663	2244	1326	3570	0.371429	0.371429		0.7578	1523.01	20.989	1502.02	41.9781	1544	0.0271879	0.14449
		0.1001	2907	665	2242	1330	3572	0.37234	0.371924		0.7574	1523.94	21.0616	1502.88	42.1233	1545	0.0272643	0.1452
		0.09994	2908	665	2243	1330	3573	0.372236	0.371924		0.7544	1524.87	21.1345	1503.73	42.269	1546	0.0273408	0.145675
		0.09966	2909	665	2244	1330	3574	0.372132	0.371924		0.7538	1525.79	21.2076	1504.58	42.4151	1547	0.0274177	0.146151
		0.09939	2910	665	2245	1330	3575	0.372028	0.371924		0.7531	1526.72	21.2809	1505.44	42.5617	1548	0.0274947	0.146867
		0.09935	2911	665	2246	1330	3576	0.371924	0.371924		0.7531	1527.65	21.3544	1506.29	42.7088	1549	0.0275719	0.146867
		0.09928	2911	666	2245	1332	3577	0.372379	0.372379		0.7513	1528.57	21.4282	1507.14	42.8564	1550	0.0276493	0.147586
		0.09919	2911	667	2244	1334	3578	0.372834	0.372664		0.7512	1529.5	21.5022	1508	43.0045	1551	0.0277269	0.148067
		0.09915	2912	667	2245	1334	3579	0.37273	0.372664		0.7488	1530.42	21.5765	1508.85	43.153	1552	0.0278048	0.148549
		0.0991	2912	668	2244	1336	3580	0.373184	0.372664		0.7486	1531.35	21.651	1509.7	43.3021	1553	0.0278829	0.149033
		0.0989	2913	668	2245	1336	3581	0.37308	0.372664		0.7475	1532.27	21.7258	1510.55	43.4516	1554	0.0279611	0.149518
		0.09877	2914	668	2246	1336	3582	0.372976	0.372664		0.7474	1533.2	21.8008	1511.4	43.6016	1555	0.0280396	0.150004
		0.09856	2915	668	2247	1336	3583	0.372872	0.372664		0.7468	1534.12	21.876	1512.25	43.7521	1556	0.0281183	0.150491
		0.09841	2916	668	2248	1336	3584	0.372768	0.372664		0.7464	1535.05	21.9515	1513.1	43.9031	1557	0.0281972	0.150979
		0.0982	2917	668	2249	1336	3585	0.372664	0.372664		0.745	1535.97	22.0273	1513.95	44.0545	1558	0.0282763	0.151469
		0.09803	2917	669	2248	1338	3586	0.373118	0.373118		0.7442	1536.9	22.1032	1514.79	44.2065	1559	0.0283557	0.15196
		0.09793	2918	670	2248	1340	3588	0.373467	0.373259		0.7431	1537.82	22.1795	1515.64	44.3589	1560	0.0284352	0.152452
		0.09777	2919	670	2249	1340	3589	0.373363	0.373259		0.7427	1538.74	22.2559	1516.49	44.5119	1561	0.028515	0.152946
		0.0977	2920	670	2250	1340	3590	0.373259	0.373259		0.7418	1539.67	22.3327	1517.33	44.6653	1562	0.028595	0.153441
		0.09751	2920	671	2249	1342	3591	0.373712	0.373608		0.7398	1540.59	22.4096	1518.18	44.8193	1563	0.0286752	0.153937
		0.09745	2921	671	2250	1342	3592	0.373608	0.373608		0.7346	1541.51	22.4869	1519.03	44.9737	1564	0.0287556	0.154434
		0.09741	2921	672	2249	1344	3593	0.374061	0.374061		0.7333	1542.44	22.5643	1519.87	45.1286	1565	0.0288362	0.154932
		0.09662	2921	673	2248	1346	3594	0.374513	0.374305		0.7328	1543.36	22.642	1520.72	45.2841	1566	0.028917	0.155432
		0.09612	2922	673	2249	1346	3595	0.374409	0.374305		0.7327	1544.28	22.72	1521.56	45.44	1567	0.0289981	0.155933
		0.096	2923	673	2250	1346	3596	0.374305	0.374305		0.7302	1545.2	22.7982	1522.4	45.5964	1568	0.0290794	0.156435
		0.09577	2923	674	2249	1348	3597	0.374757	0.374757		0.7296	1546.12	22.8767	1523.25	45.7534	1569	0.0291609	0.157191
		0.09557	2923	675	2248	1350	3598	0.375208	0.375		0.7296	1547.04	22.9554	1524.09	45.9108	1570	0.0292426	0.157191
		0.09551	2925	675	2250	1350	3600	0.375	0.375		0.7253	1547.97	23.0344	1524.93	46.0688	1571	0.0293245	0.15795
		0.09539	2925	676	2249	1352	3601	0.375451	0.375347		0.7252	1548.89	23.1136	1525.77	46.2272	1572	0.0294066	0.158457
		0.09536	2926	676	2250	1352	3602	0.375347	0.375347		0.7239	1549.81	23.1931	1526.61	46.3862	1573	0.029489	0.158966
		0.09503	2926	677	2249	1354	3603	0.375798	0.375694		0.7185	1550.73	23.2728	1527.45	46.5457	1574	0.0295716	0.159731
		0.09481	2927	677	2250	1354	3604	0.375694	0.375694		0.7185	1551.65	23.3528	1528.29	46.7057	1575	0.0296544	0.159731
		0.0947	2927	678	2249	1356	3605	0.376144	0.376144		0.7158	1552.57	23.4331	1529.13	46.8662	1576	0.0297374	0.160756
		0.09464	2927	679	2248	1358	3606	0.376595	0.37649		0.7158	1553.49	23.5136	1529.97	47.0272	1577	0.0298207	0.160756
		0.09385	2928	679	2249	1358	3607	0.37649	0.37649		0.7154	1554.41	23.5943	1530.81	47.1887	1578	0.0299041	0.161527
		0.09382	2928	680	2248	1360	3608	0.37694	0.37694		0.7141	1555.32	23.6754	1531.65	47.3507	1579	0.0299878	0.162044
		0.0936	2928	681	2247	1362	3609	0.37739	0.377076		0.713	1556.24	23.7567	1532.49	47.5133	1580	0.0300717	0.162561
		0.09341	2929	681	2248	1362	3610	0.377285	0.377076		0.7075	1557.16	23.8382	1533.32	47.6764	1581	0.0301558	0.16308
		0.09339	2930	681	2249	1362	3611	0.377181	0.377076		0.7047	1558.08	23.92	1534.16	47.84	1582	0.0302402	0.16386
		0.09334	2931	681	2250	1362	3612	0.377076	0.377076		0.7047	1559	24.0021	1535	48.0041	1583	0.0303248	0.16386
		0.09319	2931	682	2249	1364	3613	0.377526	0.377421		0.7038	1559.92	24.0844	1535.83	48.1687	1584	0.0304096	0.164643
		0.09317	2932	682	2250	1364	3614	0.377421	0.377421		0.7027	1560.83	24.167	1536.67	48.3339	1585	0.0304946	0.165167
		0.09305	2932	683	2249	1366	3615	0.37787	0.377765		0.7024	1561.75	24.2498	1537.5	48.4996	1586	0.0305798	0.165692
		0.09298	2933	683	2250	1366	3616	0.377765	0.377765		0.7019	1562.67	24.3329	1538.33	48.6658	1587	0.0306653	0.166218
		0.09283	2933	684	2249	1368	3617	0.378214	0.378214		0.7011	1563.58	24.4163	1539.17	48.8326	1588	0.030751	0.16701
		0.09278	2933	685	2248	1370	3618	0.378662	0.378662		0.7011	1564.5	24.4999	1540	48.9998	1589	0.0308369	0.16701
[truncated: 2,811 more rows]

## Sheet: Spectral Level Data
Spectral Level Data		Confidence Threshold	Forward	Reverse	Correct	Incorrect	Total	Global FDR	q-value		Fit Confidence Threshold	Fit Forward	Fit Reverse	Fit Correct	Fit Incorrect	Fit Total	Fit Global FDR	Fit Local FDR
[truncated: 11,815 more rows]

[truncated: 13 more sheets: Search Summary, Advanced Metadata, Speed and Distribution Analysis, Single Results Table, Protein FDR Summary, Distinct Peptide FDR Summary, Spectrum FDR Summary, PDST Controls, Protein Summary, Peptide Summary, Distinct Peptide Summary, Feature Summary, Single Column Summary]
