# Supplementary material for: In vivo proteomic mapping through GFP-directed proximity-dependent biotin labelling in zebrafish
Source: eLife. 2021 Feb 16;10:e64631. doi: 10.7554/eLife.64631 (PMC7906605; doi:10.7554/eLife.64631)
Supplement: Figure 5—source data 2. [file elife-64631-fig5-data2.xlsx]

## Sheet: Metadata
_RESULTS_version	5
RESULTS_SEARCH_STAT_search_begin_time_clock	01/19/2021 16:07:13
RESULTS_SEARCH_STAT_search_end_time_clock	01/20/2021 19:27:15
RESULTS_SEARCH_STAT_search_time_duration	#VALUE!
RESULTS_SEARCH_STAT_stage_signal_processing_begin_time_clock	01/19/2021 16:07:14
RESULTS_SEARCH_STAT_stage_signal_processing_end_time_clock	01/20/2021 15:21:12
RESULTS_SEARCH_STAT_stage_signal_processing_time_duration	#VALUE!
RESULTS_SEARCH_STAT_stage_waiting_begin_time_clock	01/20/2021 15:21:12
RESULTS_SEARCH_STAT_stage_waiting_end_time_clock	01/20/2021 15:24:44
RESULTS_SEARCH_STAT_stage_waiting_time_duration	2481-11-30
RESULTS_SEARCH_STAT_stage_searching_begin_time_clock	01/20/2021 15:24:44
RESULTS_SEARCH_STAT_stage_searching_end_time_clock	01/20/2021 17:51:44
RESULTS_SEARCH_STAT_stage_searching_time_duration	#VALUE!
RESULTS_SEARCH_STAT_stage_fdr_begin_time_clock	01/20/2021 17:51:45
RESULTS_SEARCH_STAT_stage_fdr_end_time_clock	01/20/2021 19:27:15
RESULTS_SEARCH_STAT_stage_fdr_time_duration	#VALUE!
RESULTS_SEARCH_STAT_task_fraglet_exe_begin_time_clock	01/20/2021 15:21:19
RESULTS_SEARCH_STAT_task_fraglet_exe_end_time_clock	01/20/2021 16:44:18
RESULTS_SEARCH_STAT_task_fraglet_exe_time_duration	4978713
RESULTS_SEARCH_STAT_task_fraglet_exe_time_cpu	#VALUE!
RESULTS_SEARCH_STAT_task_taglet_exe_begin_time_clock	01/20/2021 16:57:26
RESULTS_SEARCH_STAT_task_taglet_exe_end_time_clock	01/20/2021 17:38:15
RESULTS_SEARCH_STAT_task_taglet_exe_time_duration	2449218
RESULTS_SEARCH_STAT_task_taglet_exe_time_cpu	#VALUE!
RESULTS_SEARCH_STAT_task_progroup_begin_time_clock	01/20/2021 17:38:15
RESULTS_SEARCH_STAT_task_progroup_end_time_clock	01/20/2021 17:51:44
RESULTS_SEARCH_STAT_task_progroup_time_duration	808953
RESULTS_SEARCH_STAT_task_progroup_time_cpu	4264-09-21
RESULTS_SEARCH_STAT_task_focusing_begin_time_clock	01/20/2021 16:44:18
RESULTS_SEARCH_STAT_task_focusing_end_time_clock	01/20/2021 16:57:26
RESULTS_SEARCH_STAT_task_focusing_time_duration	787596
RESULTS_SEARCH_STAT_task_focusing_time_cpu	546190
RESULTS_SEARCH_STAT_computer_memory	32767
RESULTS_SEARCH_STAT_computer_name	IMB-MASS02
RESULTS_SEARCH_STAT_num_proteins	150424
RESULTS_SEARCH_STAT_num_residues	75708562
RESULTS_SEARCH_STAT_number_cores	8
RESULTS_SEARCH_STAT_number_licensed_tasks	16
RESULTS_SEARCH_STAT_number_processors	8
RESULTS_SEARCH_STAT_os	Windows Server 2008 R2 Standard (6.1.7600)
RESULTS_SEARCH_1_time_cpu	128966
RESULTS_SEARCH_1_time_duration	143509
RESULTS_SEARCH_1_version	5.0.1.4874
RESULTS_SEARCH_1_xml:id	SEARCH:1:637466692301440684_0
RESULTS_SEARCH_1_PARAMETERS_chemical_data_edited	FALSE
RESULTS_SEARCH_1_PARAMETERS_do_multiprecursor_search	TRUE
RESULTS_SEARCH_1_PARAMETERS_do_reverse_search	TRUE
RESULTS_SEARCH_1_PARAMETERS_max_quant_labels	35
RESULTS_SEARCH_1_PARAMETERS_maxresults	15
RESULTS_SEARCH_1_PARAMETERS_separate_searches	FALSE
RESULTS_SEARCH_1_PARAMETERS_MSTOLERANCE_type	dalton
RESULTS_SEARCH_1_PARAMETERS_MSTOLERANCE_value	0.05
RESULTS_SEARCH_1_PARAMETERS_MSMSTOLERANCE_type	dalton
RESULTS_SEARCH_1_PARAMETERS_MSMSTOLERANCE_value	0.1
RESULTS_SEARCH_1_PARAMETERS_MS_STANDARD_DEVIATION_type	dalton
RESULTS_SEARCH_1_PARAMETERS_MS_STANDARD_DEVIATION_value	0.0011
RESULTS_SEARCH_1_PARAMETERS_MSMS_STANDARD_DEVIATION_type	dalton
RESULTS_SEARCH_1_PARAMETERS_MSMS_STANDARD_DEVIATION_value	0.01
RESULTS_SEARCH_1_PARAMETERS_FASTA_filename	C:\AB SCIEX\ProteinPilot Data\SearchDatabases\uniprot-zebrafish_with_Clover.fasta
RESULTS_SEARCH_1_PARAMETERS_AUTO_CALIBRATION_ms	TRUE
RESULTS_SEARCH_1_PARAMETERS_AUTO_CALIBRATION_msexport	FALSE
RESULTS_SEARCH_1_PARAMETERS_AUTO_CALIBRATION_msms	TRUE
RESULTS_SEARCH_1_PARAMETERS_AUTO_CALIBRATION_msmstolsdratio	2.75
RESULTS_SEARCH_1_PARAMETERS_AUTO_CALIBRATION_mstolsdratio	7
RESULTS_SEARCH_1_PARAMETERS_AUTO_CALIBRATION_squareroot	TRUE
RESULTS_SEARCH_1_PARAMETERS_AUTO_CALIBRATION_type	dalton
RESULTS_SEARCH_1_PARAMETERS_AUTO_CALIBRATION_MCP_d_s_s_f	0.0666667
RESULTS_SEARCH_1_PARAMETERS_AUTO_CALIBRATION_MCP_d_s_w_f	3
RESULTS_SEARCH_1_PARAMETERS_AUTO_CALIBRATION_MCP_m_f_r_mbc	200
RESULTS_SEARCH_1_PARAMETERS_AUTO_CALIBRATION_MCP_m_m_c	10
RESULTS_SEARCH_1_PARAMETERS_AUTO_CALIBRATION_MCP_m_m_f_s	0.25
RESULTS_SEARCH_1_PARAMETERS_AUTO_CALIBRATION_MCP_m_m_p_f	0.33
RESULTS_SEARCH_1_PARAMETERS_AUTO_CALIBRATION_MCP_m_m_p_rms_f	1
RESULTS_SEARCH_1_PARAMETERS_AUTO_CALIBRATION_MCP_m_p_t_f	1
RESULTS_SEARCH_1_PARAMETERS_AUTO_CALIBRATION_MCP_m_r_h_n_b	15
RESULTS_SEARCH_1_PARAMETERS_AUTO_CALIBRATION_MCP_m_z_n_s	99
RESULTS_SEARCH_1_PARAMETERS_AUTO_CALIBRATION_MCP_m_z_s_mn_f_r	0.0666667
RESULTS_SEARCH_1_PARAMETERS_AUTO_CALIBRATION_MCP_m_z_s_mx_f_r	0.1
RESULTS_SEARCH_1_PARAMETERS_MS_AUTO_CALIBRATION_OUT_avres	-3.73701e-10
RESULTS_SEARCH_1_PARAMETERS_MS_AUTO_CALIBRATION_OUT_c0	-7.42925e-05
RESULTS_SEARCH_1_PARAMETERS_MS_AUTO_CALIBRATION_OUT_c1minus1	4.84003e-06
RESULTS_SEARCH_1_PARAMETERS_MS_AUTO_CALIBRATION_OUT_c2	0
RESULTS_SEARCH_1_PARAMETERS_MS_AUTO_CALIBRATION_OUT_file	1
RESULTS_SEARCH_1_PARAMETERS_MS_AUTO_CALIBRATION_OUT_partnumber	1
RESULTS_SEARCH_1_PARAMETERS_MS_AUTO_CALIBRATION_OUT_polyorder	1
RESULTS_SEARCH_1_PARAMETERS_MS_AUTO_CALIBRATION_OUT_sample	1
RESULTS_SEARCH_1_PARAMETERS_MS_AUTO_CALIBRATION_OUT_squareroot	TRUE
RESULTS_SEARCH_1_PARAMETERS_MSMS_AUTO_CALIBRATION_OUT_avres	-5.54314e-08
RESULTS_SEARCH_1_PARAMETERS_MSMS_AUTO_CALIBRATION_OUT_c0	2.10379e-05
RESULTS_SEARCH_1_PARAMETERS_MSMS_AUTO_CALIBRATION_OUT_c1minus1	-9.35169e-07
RESULTS_SEARCH_1_PARAMETERS_MSMS_AUTO_CALIBRATION_OUT_c2	0
RESULTS_SEARCH_1_PARAMETERS_MSMS_AUTO_CALIBRATION_OUT_file	1
RESULTS_SEARCH_1_PARAMETERS_MSMS_AUTO_CALIBRATION_OUT_partnumber	1
RESULTS_SEARCH_1_PARAMETERS_MSMS_AUTO_CALIBRATION_OUT_polyorder	1
RESULTS_SEARCH_1_PARAMETERS_MSMS_AUTO_CALIBRATION_OUT_sample	1
RESULTS_SEARCH_1_PARAMETERS_MSMS_AUTO_CALIBRATION_OUT_squareroot	TRUE
RESULTS_SEARCH_1_PARAMETERS_MAX_PRECURSORS_FRAGLET	5
RESULTS_SEARCH_1_PARAMETERS_MAX_PRECURSORS_TAGLET	1
RESULTS_SEARCH_1_PARAMETERS_PRECURSORS_DR_FRAGLET	10
RESULTS_SEARCH_1_PARAMETERS_PRECURSORS_DR_TAGLET	3
RESULTS_SEARCH_1_PARAMETERS_DEFAULT_CHARGE_STATE_1_charge	2
RESULTS_SEARCH_1_PARAMETERS_DEFAULT_CHARGE_STATE_1_probability	1
RESULTS_SEARCH_1_PARAMETERS_DEFAULT_CHARGE_STATE_2_charge	3
RESULTS_SEARCH_1_PARAMETERS_DEFAULT_CHARGE_STATE_2_probability	1
RESULTS_SEARCH_1_PARAMETERS_DEFAULT_CHARGE_STATE_3_charge	4
RESULTS_SEARCH_1_PARAMETERS_DEFAULT_CHARGE_STATE_3_probability	1
RESULTS_SEARCH_1_PARAMETERS_VERSION	5.0.1.0, 4895
RESULTS_SEARCH_1_PARAMETERS_PARAGON_VERSION	5.0.1.0, 4874
RESULTS_SEARCH_1_PARAMETERS_APPLICATION	ProteinPilot(tm) Software
RESULTS_SEARCH_1_PARAMETERS_PROGROUP_alternativedispositionmaximumfoldprobabilitydrop	100
RESULTS_SEARCH_1_PARAMETERS_PROGROUP_alternativedispositionmaximumfoldscoredrop	2
RESULTS_SEARCH_1_PARAMETERS_PROGROUP_autodiscordantpeptidethreshold	0.3
RESULTS_SEARCH_1_PARAMETERS_PROGROUP_bayesconfidencecalclulation	TRUE
RESULTS_SEARCH_1_PARAMETERS_PROGROUP_calibrateconfidence	TRUE
RESULTS_SEARCH_1_PARAMETERS_PROGROUP_compresspeptides	FALSE
RESULTS_SEARCH_1_PARAMETERS_PROGROUP_confidencepercentthresholdforexcludingothersfromquant	15
RESULTS_SEARCH_1_PARAMETERS_PROGROUP_confidencepercentthresholdforincludingselfinquant	15
RESULTS_SEARCH_1_PARAMETERS_PROGROUP_donotstoremspeaklists	FALSE
RESULTS_SEARCH_1_PARAMETERS_PROGROUP_fasta	C:\AB SCIEX\ProteinPilot Data\SearchDatabases\uniprot-zebrafish_with_Clover.fasta
RESULTS_SEARCH_1_PARAMETERS_PROGROUP_featuregroupminpepconf	0.66
RESULTS_SEARCH_1_PARAMETERS_PROGROUP_featuregroupminups	0.47
RESULTS_SEARCH_1_PARAMETERS_PROGROUP_focusingintersection	4
RESULTS_SEARCH_1_PARAMETERS_PROGROUP_focusingminimummatchconfidence	0.1
RESULTS_SEARCH_1_PARAMETERS_PROGROUP_focusingminunusedprotscore	0.1
RESULTS_SEARCH_1_PARAMETERS_PROGROUP_focusingsubsetcutoff	6
RESULTS_SEARCH_1_PARAMETERS_PROGROUP_intersection	1.3
RESULTS_SEARCH_1_PARAMETERS_PROGROUP_minimummatchconfidencecutoff	0.001
RESULTS_SEARCH_1_PARAMETERS_PROGROUP_minunusedprotscore	0.0458
RESULTS_SEARCH_1_PARAMETERS_PROGROUP_subsetcutoff	2
RESULTS_SEARCH_1_PARAMETERS_PROGROUP_unusedprotscorethresholdforexcludingothersfromquant	1.3
RESULTS_SEARCH_1_PARAMETERS_PEAKLIST_count	1907-11-21
RESULTS_SEARCH_1_PARAMETERS_PEAKLIST_filenumber	1
RESULTS_SEARCH_1_PARAMETERS_PEAKLIST_original_count	2882
RESULTS_SEARCH_1_PARAMETERS_PEAKLIST_originalfilename	C:\AB SCIEX\ProteinPilot Data\Results\Albert\ZX 20200429 6600\ZX 20200429 6600 C 1.wiff
RESULTS_SEARCH_1_PARAMETERS_PEAKLIST_partnumber	1
RESULTS_SEARCH_1_PARAMETERS_QUANT_TYPE_background_correction	FALSE
RESULTS_SEARCH_1_PARAMETERS_QUANT_TYPE_bias_correction	TRUE
RESULTS_SEARCH_1_PARAMETERS_QUANT_TYPE_keep_extreme_peptides_over_fraction	0
RESULTS_SEARCH_1_PARAMETERS_QUANT_TYPE_low_confidence_check	TRUE
RESULTS_SEARCH_1_PARAMETERS_QUANT_TYPE_low_intensity_check	TRUE
RESULTS_SEARCH_1_PARAMETERS_QUANT_TYPE_median_statistic	TRUE
RESULTS_SEARCH_1_PARAMETERS_QUANT_TYPE_mod_check	TRUE
RESULTS_SEARCH_1_PARAMETERS_QUANT_TYPE_quant_threshold	-1
RESULTS_SEARCH_1_PARAMETERS_QUANT_TYPE_quant_threshold_sn	9
RESULTS_SEARCH_1_PARAMETERS_QUANT_TYPE_separate_searches	FALSE
RESULTS_SEARCH_1_PARAMETERS_QUANT_TYPE_shared_msms_check	TRUE
RESULTS_SEARCH_1_PARAMETERS_PARAGON_METHOD_SETTINGS_UI_SAMPLE_TYPE	Identification
RESULTS_SEARCH_1_PARAMETERS_PARAGON_METHOD_SETTINGS_UI_CYS_ALKYLATION	Iodoacetamide w other Cys mods possible
RESULTS_SEARCH_1_PARAMETERS_PARAGON_METHOD_SETTINGS_UI_DIGESTION	Trypsin + Lys C
RESULTS_SEARCH_1_PARAMETERS_PARAGON_METHOD_SETTINGS_UI_SPECIAL_FACTOR	Gel-based ID
RESULTS_SEARCH_1_PARAMETERS_PARAGON_METHOD_SETTINGS_UI_INSTRUMENT	TripleTOF 6600
RESULTS_SEARCH_1_PARAMETERS_PARAGON_METHOD_SETTINGS_UI_SEARCH_EFFORT	Thorough
RESULTS_SEARCH_1_PARAMETERS_PARAGON_METHOD_SETTINGS_UI_USER_NAME	IMB-MASS02\massuser
RESULTS_SEARCH_1_PARAMETERS_PARAGON_METHOD_SETTINGS_UI_MACHINE_NAME	IMB-MASS02
RESULTS_SEARCH_1_PARAMETERS_PARAGON_METHOD_SETTINGS_UI_SEARCH_ID	6.37467e+17
RESULTS_SEARCH_1_PARAMETERS_PARAGON_METHOD_SETTINGS_UI_START_TIME	2021-01-19 16:07:13
RESULTS_SEARCH_1_PARAMETERS_PARAGON_METHOD_SETTINGS_UI_MIN_UNUSED_PROTSCORE	0.0458
RESULTS_SEARCH_1_PARAMETERS_PARAGON_METHOD_SETTINGS_UI_PSPEP	TRUE
RESULTS_SEARCH_2_time_cpu	165751
RESULTS_SEARCH_2_time_duration	209235
RESULTS_SEARCH_2_version	5.0.1.4874
RESULTS_SEARCH_2_xml:id	SEARCH:2:637466692301440684_0
RESULTS_SEARCH_2_PARAMETERS_chemical_data_edited	FALSE
RESULTS_SEARCH_2_PARAMETERS_do_multiprecursor_search	TRUE
RESULTS_SEARCH_2_PARAMETERS_do_reverse_search	TRUE
RESULTS_SEARCH_2_PARAMETERS_max_quant_labels	35
RESULTS_SEARCH_2_PARAMETERS_maxresults	15
RESULTS_SEARCH_2_PARAMETERS_separate_searches	FALSE
RESULTS_SEARCH_2_PARAMETERS_MSTOLERANCE_type	dalton
RESULTS_SEARCH_2_PARAMETERS_MSTOLERANCE_value	0.05
RESULTS_SEARCH_2_PARAMETERS_MSMSTOLERANCE_type	dalton
RESULTS_SEARCH_2_PARAMETERS_MSMSTOLERANCE_value	0.1
RESULTS_SEARCH_2_PARAMETERS_MS_STANDARD_DEVIATION_type	dalton
RESULTS_SEARCH_2_PARAMETERS_MS_STANDARD_DEVIATION_value	0.0011
RESULTS_SEARCH_2_PARAMETERS_MSMS_STANDARD_DEVIATION_type	dalton
RESULTS_SEARCH_2_PARAMETERS_MSMS_STANDARD_DEVIATION_value	0.01
RESULTS_SEARCH_2_PARAMETERS_FASTA_filename	C:\AB SCIEX\ProteinPilot Data\SearchDatabases\uniprot-zebrafish_with_Clover.fasta
RESULTS_SEARCH_2_PARAMETERS_AUTO_CALIBRATION_ms	TRUE
RESULTS_SEARCH_2_PARAMETERS_AUTO_CALIBRATION_msexport	FALSE
RESULTS_SEARCH_2_PARAMETERS_AUTO_CALIBRATION_msms	TRUE
RESULTS_SEARCH_2_PARAMETERS_AUTO_CALIBRATION_msmstolsdratio	2.75
RESULTS_SEARCH_2_PARAMETERS_AUTO_CALIBRATION_mstolsdratio	7
RESULTS_SEARCH_2_PARAMETERS_AUTO_CALIBRATION_squareroot	TRUE
RESULTS_SEARCH_2_PARAMETERS_AUTO_CALIBRATION_type	dalton
RESULTS_SEARCH_2_PARAMETERS_AUTO_CALIBRATION_MCP_d_s_s_f	0.0666667
RESULTS_SEARCH_2_PARAMETERS_AUTO_CALIBRATION_MCP_d_s_w_f	3
RESULTS_SEARCH_2_PARAMETERS_AUTO_CALIBRATION_MCP_m_f_r_mbc	200
RESULTS_SEARCH_2_PARAMETERS_AUTO_CALIBRATION_MCP_m_m_c	10
RESULTS_SEARCH_2_PARAMETERS_AUTO_CALIBRATION_MCP_m_m_f_s	0.25
RESULTS_SEARCH_2_PARAMETERS_AUTO_CALIBRATION_MCP_m_m_p_f	0.33
RESULTS_SEARCH_2_PARAMETERS_AUTO_CALIBRATION_MCP_m_m_p_rms_f	1
RESULTS_SEARCH_2_PARAMETERS_AUTO_CALIBRATION_MCP_m_p_t_f	1
RESULTS_SEARCH_2_PARAMETERS_AUTO_CALIBRATION_MCP_m_r_h_n_b	15
RESULTS_SEARCH_2_PARAMETERS_AUTO_CALIBRATION_MCP_m_z_n_s	99
RESULTS_SEARCH_2_PARAMETERS_AUTO_CALIBRATION_MCP_m_z_s_mn_f_r	0.0666667
RESULTS_SEARCH_2_PARAMETERS_AUTO_CALIBRATION_MCP_m_z_s_mx_f_r	0.1
RESULTS_SEARCH_2_PARAMETERS_MS_AUTO_CALIBRATION_OUT_avres	-3.73701e-10
RESULTS_SEARCH_2_PARAMETERS_MS_AUTO_CALIBRATION_OUT_c0	-7.42925e-05
RESULTS_SEARCH_2_PARAMETERS_MS_AUTO_CALIBRATION_OUT_c1minus1	4.84003e-06
RESULTS_SEARCH_2_PARAMETERS_MS_AUTO_CALIBRATION_OUT_c2	0
RESULTS_SEARCH_2_PARAMETERS_MS_AUTO_CALIBRATION_OUT_file	1
RESULTS_SEARCH_2_PARAMETERS_MS_AUTO_CALIBRATION_OUT_partnumber	1900-01-01
RESULTS_SEARCH_2_PARAMETERS_MS_AUTO_CALIBRATION_OUT_polyorder	1
RESULTS_SEARCH_2_PARAMETERS_MS_AUTO_CALIBRATION_OUT_sample	1
RESULTS_SEARCH_2_PARAMETERS_MS_AUTO_CALIBRATION_OUT_squareroot	TRUE
RESULTS_SEARCH_2_PARAMETERS_MSMS_AUTO_CALIBRATION_OUT_avres	-5.54314e-08
RESULTS_SEARCH_2_PARAMETERS_MSMS_AUTO_CALIBRATION_OUT_c0	2.10379e-05
RESULTS_SEARCH_2_PARAMETERS_MSMS_AUTO_CALIBRATION_OUT_c1minus1	-9.35169e-07
RESULTS_SEARCH_2_PARAMETERS_MSMS_AUTO_CALIBRATION_OUT_c2	0
RESULTS_SEARCH_2_PARAMETERS_MSMS_AUTO_CALIBRATION_OUT_file	1
RESULTS_SEARCH_2_PARAMETERS_MSMS_AUTO_CALIBRATION_OUT_partnumber	1
RESULTS_SEARCH_2_PARAMETERS_MSMS_AUTO_CALIBRATION_OUT_polyorder	1
RESULTS_SEARCH_2_PARAMETERS_MSMS_AUTO_CALIBRATION_OUT_sample	1
RESULTS_SEARCH_2_PARAMETERS_MSMS_AUTO_CALIBRATION_OUT_squareroot	TRUE
RESULTS_SEARCH_2_PARAMETERS_MAX_PRECURSORS_FRAGLET	5
RESULTS_SEARCH_2_PARAMETERS_MAX_PRECURSORS_TAGLET	1
RESULTS_SEARCH_2_PARAMETERS_PRECURSORS_DR_FRAGLET	10
RESULTS_SEARCH_2_PARAMETERS_PRECURSORS_DR_TAGLET	3
RESULTS_SEARCH_2_PARAMETERS_DEFAULT_CHARGE_STATE_1_charge	2
RESULTS_SEARCH_2_PARAMETERS_DEFAULT_CHARGE_STATE_1_probability	1
RESULTS_SEARCH_2_PARAMETERS_DEFAULT_CHARGE_STATE_2_charge	3
RESULTS_SEARCH_2_PARAMETERS_DEFAULT_CHARGE_STATE_2_probability	1
RESULTS_SEARCH_2_PARAMETERS_DEFAULT_CHARGE_STATE_3_charge	4
RESULTS_SEARCH_2_PARAMETERS_DEFAULT_CHARGE_STATE_3_probability	1
RESULTS_SEARCH_2_PARAMETERS_VERSION	5.0.1.0, 4895
RESULTS_SEARCH_2_PARAMETERS_PARAGON_VERSION	5.0.1.0, 4874
RESULTS_SEARCH_2_PARAMETERS_APPLICATION	ProteinPilot(tm) Software
RESULTS_SEARCH_2_PARAMETERS_PROGROUP_alternativedispositionmaximumfoldprobabilitydrop	100
RESULTS_SEARCH_2_PARAMETERS_PROGROUP_alternativedispositionmaximumfoldscoredrop	2
RESULTS_SEARCH_2_PARAMETERS_PROGROUP_autodiscordantpeptidethreshold	0.3
RESULTS_SEARCH_2_PARAMETERS_PROGROUP_bayesconfidencecalclulation	TRUE
RESULTS_SEARCH_2_PARAMETERS_PROGROUP_calibrateconfidence	TRUE
RESULTS_SEARCH_2_PARAMETERS_PROGROUP_compresspeptides	FALSE
RESULTS_SEARCH_2_PARAMETERS_PROGROUP_confidencepercentthresholdforexcludingothersfromquant	15
RESULTS_SEARCH_2_PARAMETERS_PROGROUP_confidencepercentthresholdforincludingselfinquant	15
RESULTS_SEARCH_2_PARAMETERS_PROGROUP_donotstoremspeaklists	FALSE
RESULTS_SEARCH_2_PARAMETERS_PROGROUP_fasta	C:\AB SCIEX\ProteinPilot Data\SearchDatabases\uniprot-zebrafish_with_Clover.fasta
RESULTS_SEARCH_2_PARAMETERS_PROGROUP_featuregroupminpepconf	0.66
RESULTS_SEARCH_2_PARAMETERS_PROGROUP_featuregroupminups	0.47
RESULTS_SEARCH_2_PARAMETERS_PROGROUP_focusingintersection	4
RESULTS_SEARCH_2_PARAMETERS_PROGROUP_focusingminimummatchconfidence	0.1
RESULTS_SEARCH_2_PARAMETERS_PROGROUP_focusingminunusedprotscore	0.1
RESULTS_SEARCH_2_PARAMETERS_PROGROUP_focusingsubsetcutoff	6
RESULTS_SEARCH_2_PARAMETERS_PROGROUP_intersection	1.3
RESULTS_SEARCH_2_PARAMETERS_PROGROUP_minimummatchconfidencecutoff	0.001
RESULTS_SEARCH_2_PARAMETERS_PROGROUP_minunusedprotscore	0.0458
RESULTS_SEARCH_2_PARAMETERS_PROGROUP_subsetcutoff	2
RESULTS_SEARCH_2_PARAMETERS_PROGROUP_unusedprotscorethresholdforexcludingothersfromquant	1.3
RESULTS_SEARCH_2_PARAMETERS_PEAKLIST_count	2882
RESULTS_SEARCH_2_PARAMETERS_PEAKLIST_filenumber	1
RESULTS_SEARCH_2_PARAMETERS_PEAKLIST_original_count	2882
RESULTS_SEARCH_2_PARAMETERS_PEAKLIST_originalfilename	C:\AB SCIEX\ProteinPilot Data\Results\Albert\ZX 20200429 6600\ZX 20200429 6600 C 1.wiff
RESULTS_SEARCH_2_PARAMETERS_PEAKLIST_partnumber	1
RESULTS_SEARCH_2_PARAMETERS_QUANT_TYPE_background_correction	FALSE
RESULTS_SEARCH_2_PARAMETERS_QUANT_TYPE_bias_correction	TRUE
RESULTS_SEARCH_2_PARAMETERS_QUANT_TYPE_keep_extreme_peptides_over_fraction	0
RESULTS_SEARCH_2_PARAMETERS_QUANT_TYPE_low_confidence_check	TRUE
RESULTS_SEARCH_2_PARAMETERS_QUANT_TYPE_low_intensity_check	TRUE
RESULTS_SEARCH_2_PARAMETERS_QUANT_TYPE_median_statistic	TRUE
RESULTS_SEARCH_2_PARAMETERS_QUANT_TYPE_mod_check	TRUE
RESULTS_SEARCH_2_PARAMETERS_QUANT_TYPE_quant_threshold	-1
RESULTS_SEARCH_2_PARAMETERS_QUANT_TYPE_quant_threshold_sn	9
RESULTS_SEARCH_2_PARAMETERS_QUANT_TYPE_separate_searches	FALSE
RESULTS_SEARCH_2_PARAMETERS_QUANT_TYPE_shared_msms_check	TRUE
RESULTS_SEARCH_2_PARAMETERS_PARAGON_METHOD_SETTINGS_UI_SAMPLE_TYPE	Identification
RESULTS_SEARCH_2_PARAMETERS_PARAGON_METHOD_SETTINGS_UI_CYS_ALKYLATION	Iodoacetamide w other Cys mods possible
RESULTS_SEARCH_2_PARAMETERS_PARAGON_METHOD_SETTINGS_UI_DIGESTION	Trypsin + Lys C
RESULTS_SEARCH_2_PARAMETERS_PARAGON_METHOD_SETTINGS_UI_SPECIAL_FACTOR	Gel-based ID
RESULTS_SEARCH_2_PARAMETERS_PARAGON_METHOD_SETTINGS_UI_INSTRUMENT	TripleTOF 6600
RESULTS_SEARCH_2_PARAMETERS_PARAGON_METHOD_SETTINGS_UI_SEARCH_EFFORT	Thorough
RESULTS_SEARCH_2_PARAMETERS_PARAGON_METHOD_SETTINGS_UI_USER_NAME	IMB-MASS02\massuser
RESULTS_SEARCH_2_PARAMETERS_PARAGON_METHOD_SETTINGS_UI_MACHINE_NAME	IMB-MASS02
RESULTS_SEARCH_2_PARAMETERS_PARAGON_METHOD_SETTINGS_UI_SEARCH_ID	6.37467e+17
RESULTS_SEARCH_2_PARAMETERS_PARAGON_METHOD_SETTINGS_UI_START_TIME	2021-01-19 16:07:13
RESULTS_SEARCH_2_PARAMETERS_PARAGON_METHOD_SETTINGS_UI_MIN_UNUSED_PROTSCORE	0.0458
RESULTS_SEARCH_2_PARAMETERS_PARAGON_METHOD_SETTINGS_UI_PSPEP	TRUE
RESULTS_SEARCH_3_time_cpu	147358
RESULTS_SEARCH_3_time_duration	172417
RESULTS_SEARCH_3_version	5.0.1.4874
RESULTS_SEARCH_3_xml:id	SEARCH:1:637466692301440684_1
RESULTS_SEARCH_3_PARAMETERS_chemical_data_edited	FALSE
RESULTS_SEARCH_3_PARAMETERS_do_multiprecursor_search	TRUE
RESULTS_SEARCH_3_PARAMETERS_do_reverse_search	TRUE
RESULTS_SEARCH_3_PARAMETERS_max_quant_labels	35
RESULTS_SEARCH_3_PARAMETERS_maxresults	15
RESULTS_SEARCH_3_PARAMETERS_separate_searches	FALSE
RESULTS_SEARCH_3_PARAMETERS_MSTOLERANCE_type	dalton
RESULTS_SEARCH_3_PARAMETERS_MSTOLERANCE_value	0.05
RESULTS_SEARCH_3_PARAMETERS_MSMSTOLERANCE_type	dalton
RESULTS_SEARCH_3_PARAMETERS_MSMSTOLERANCE_value	0.1
RESULTS_SEARCH_3_PARAMETERS_MS_STANDARD_DEVIATION_type	dalton
RESULTS_SEARCH_3_PARAMETERS_MS_STANDARD_DEVIATION_value	0.0011
RESULTS_SEARCH_3_PARAMETERS_MSMS_STANDARD_DEVIATION_type	dalton
RESULTS_SEARCH_3_PARAMETERS_MSMS_STANDARD_DEVIATION_value	0.01
RESULTS_SEARCH_3_PARAMETERS_FASTA_filename	C:\AB SCIEX\ProteinPilot Data\SearchDatabases\uniprot-zebrafish_with_Clover.fasta
RESULTS_SEARCH_3_PARAMETERS_AUTO_CALIBRATION_ms	TRUE
RESULTS_SEARCH_3_PARAMETERS_AUTO_CALIBRATION_msexport	FALSE
RESULTS_SEARCH_3_PARAMETERS_AUTO_CALIBRATION_msms	TRUE
RESULTS_SEARCH_3_PARAMETERS_AUTO_CALIBRATION_msmstolsdratio	2.75
RESULTS_SEARCH_3_PARAMETERS_AUTO_CALIBRATION_mstolsdratio	7
RESULTS_SEARCH_3_PARAMETERS_AUTO_CALIBRATION_squareroot	TRUE
RESULTS_SEARCH_3_PARAMETERS_AUTO_CALIBRATION_type	dalton
RESULTS_SEARCH_3_PARAMETERS_AUTO_CALIBRATION_MCP_d_s_s_f	0.0666667
RESULTS_SEARCH_3_PARAMETERS_AUTO_CALIBRATION_MCP_d_s_w_f	3
RESULTS_SEARCH_3_PARAMETERS_AUTO_CALIBRATION_MCP_m_f_r_mbc	200
RESULTS_SEARCH_3_PARAMETERS_AUTO_CALIBRATION_MCP_m_m_c	10
RESULTS_SEARCH_3_PARAMETERS_AUTO_CALIBRATION_MCP_m_m_f_s	0.25
RESULTS_SEARCH_3_PARAMETERS_AUTO_CALIBRATION_MCP_m_m_p_f	0.33
RESULTS_SEARCH_3_PARAMETERS_AUTO_CALIBRATION_MCP_m_m_p_rms_f	1
RESULTS_SEARCH_3_PARAMETERS_AUTO_CALIBRATION_MCP_m_p_t_f	1
RESULTS_SEARCH_3_PARAMETERS_AUTO_CALIBRATION_MCP_m_r_h_n_b	15
RESULTS_SEARCH_3_PARAMETERS_AUTO_CALIBRATION_MCP_m_z_n_s	99
RESULTS_SEARCH_3_PARAMETERS_AUTO_CALIBRATION_MCP_m_z_s_mn_f_r	0.0666667
RESULTS_SEARCH_3_PARAMETERS_AUTO_CALIBRATION_MCP_m_z_s_mx_f_r	0.1
RESULTS_SEARCH_3_PARAMETERS_MS_AUTO_CALIBRATION_OUT_avres	3.76328e-10
RESULTS_SEARCH_3_PARAMETERS_MS_AUTO_CALIBRATION_OUT_c0	5.62415e-05
RESULTS_SEARCH_3_PARAMETERS_MS_AUTO_CALIBRATION_OUT_c1minus1	-1.14089e-07
RESULTS_SEARCH_3_PARAMETERS_MS_AUTO_CALIBRATION_OUT_c2	0
RESULTS_SEARCH_3_PARAMETERS_MS_AUTO_CALIBRATION_OUT_file	1
RESULTS_SEARCH_3_PARAMETERS_MS_AUTO_CALIBRATION_OUT_partnumber	2
RESULTS_SEARCH_3_PARAMETERS_MS_AUTO_CALIBRATION_OUT_polyorder	1
RESULTS_SEARCH_3_PARAMETERS_MS_AUTO_CALIBRATION_OUT_sample	1
RESULTS_SEARCH_3_PARAMETERS_MS_AUTO_CALIBRATION_OUT_squareroot	TRUE
RESULTS_SEARCH_3_PARAMETERS_MSMS_AUTO_CALIBRATION_OUT_avres	-5.17865e-08
RESULTS_SEARCH_3_PARAMETERS_MSMS_AUTO_CALIBRATION_OUT_c0	-7.0813e-06
RESULTS_SEARCH_3_PARAMETERS_MSMS_AUTO_CALIBRATION_OUT_c1minus1	-1.29099e-07
RESULTS_SEARCH_3_PARAMETERS_MSMS_AUTO_CALIBRATION_OUT_c2	0
RESULTS_SEARCH_3_PARAMETERS_MSMS_AUTO_CALIBRATION_OUT_file	1
RESULTS_SEARCH_3_PARAMETERS_MSMS_AUTO_CALIBRATION_OUT_partnumber	2
RESULTS_SEARCH_3_PARAMETERS_MSMS_AUTO_CALIBRATION_OUT_polyorder	1
RESULTS_SEARCH_3_PARAMETERS_MSMS_AUTO_CALIBRATION_OUT_sample	1
RESULTS_SEARCH_3_PARAMETERS_MSMS_AUTO_CALIBRATION_OUT_squareroot	TRUE
RESULTS_SEARCH_3_PARAMETERS_MAX_PRECURSORS_FRAGLET	1900-01-05
RESULTS_SEARCH_3_PARAMETERS_MAX_PRECURSORS_TAGLET	1
RESULTS_SEARCH_3_PARAMETERS_PRECURSORS_DR_FRAGLET	10
RESULTS_SEARCH_3_PARAMETERS_PRECURSORS_DR_TAGLET	3
RESULTS_SEARCH_3_PARAMETERS_DEFAULT_CHARGE_STATE_1_charge	2
RESULTS_SEARCH_3_PARAMETERS_DEFAULT_CHARGE_STATE_1_probability	1
RESULTS_SEARCH_3_PARAMETERS_DEFAULT_CHARGE_STATE_2_charge	3
RESULTS_SEARCH_3_PARAMETERS_DEFAULT_CHARGE_STATE_2_probability	1
RESULTS_SEARCH_3_PARAMETERS_DEFAULT_CHARGE_STATE_3_charge	4
RESULTS_SEARCH_3_PARAMETERS_DEFAULT_CHARGE_STATE_3_probability	1
RESULTS_SEARCH_3_PARAMETERS_VERSION	5.0.1.0, 4895
RESULTS_SEARCH_3_PARAMETERS_PARAGON_VERSION	5.0.1.0, 4874
RESULTS_SEARCH_3_PARAMETERS_APPLICATION	ProteinPilot(tm) Software
RESULTS_SEARCH_3_PARAMETERS_PROGROUP_alternativedispositionmaximumfoldprobabilitydrop	100
RESULTS_SEARCH_3_PARAMETERS_PROGROUP_alternativedispositionmaximumfoldscoredrop	2
RESULTS_SEARCH_3_PARAMETERS_PROGROUP_autodiscordantpeptidethreshold	0.3
RESULTS_SEARCH_3_PARAMETERS_PROGROUP_bayesconfidencecalclulation	TRUE
RESULTS_SEARCH_3_PARAMETERS_PROGROUP_calibrateconfidence	TRUE
RESULTS_SEARCH_3_PARAMETERS_PROGROUP_compresspeptides	FALSE
RESULTS_SEARCH_3_PARAMETERS_PROGROUP_confidencepercentthresholdforexcludingothersfromquant	15
RESULTS_SEARCH_3_PARAMETERS_PROGROUP_confidencepercentthresholdforincludingselfinquant	15
RESULTS_SEARCH_3_PARAMETERS_PROGROUP_donotstoremspeaklists	FALSE
RESULTS_SEARCH_3_PARAMETERS_PROGROUP_fasta	C:\AB SCIEX\ProteinPilot Data\SearchDatabases\uniprot-zebrafish_with_Clover.fasta
RESULTS_SEARCH_3_PARAMETERS_PROGROUP_featuregroupminpepconf	0.66
RESULTS_SEARCH_3_PARAMETERS_PROGROUP_featuregroupminups	0.47
RESULTS_SEARCH_3_PARAMETERS_PROGROUP_focusingintersection	4
RESULTS_SEARCH_3_PARAMETERS_PROGROUP_focusingminimummatchconfidence	0.1
RESULTS_SEARCH_3_PARAMETERS_PROGROUP_focusingminunusedprotscore	0.1
RESULTS_SEARCH_3_PARAMETERS_PROGROUP_focusingsubsetcutoff	6
RESULTS_SEARCH_3_PARAMETERS_PROGROUP_intersection	1.3
RESULTS_SEARCH_3_PARAMETERS_PROGROUP_minimummatchconfidencecutoff	0.001
RESULTS_SEARCH_3_PARAMETERS_PROGROUP_minunusedprotscore	0.0458
RESULTS_SEARCH_3_PARAMETERS_PROGROUP_subsetcutoff	2
RESULTS_SEARCH_3_PARAMETERS_PROGROUP_unusedprotscorethresholdforexcludingothersfromquant	1900-01-01 07:12:00
RESULTS_SEARCH_3_PARAMETERS_PEAKLIST_count	2867
RESULTS_SEARCH_3_PARAMETERS_PEAKLIST_filenumber	1
RESULTS_SEARCH_3_PARAMETERS_PEAKLIST_original_count	2867
RESULTS_SEARCH_3_PARAMETERS_PEAKLIST_originalfilename	C:\AB SCIEX\ProteinPilot Data\Results\Albert\ZX 20200429 6600\ZX 20200429 6600 C 1.wiff
RESULTS_SEARCH_3_PARAMETERS_PEAKLIST_partnumber	2
RESULTS_SEARCH_3_PARAMETERS_QUANT_TYPE_background_correction	FALSE
RESULTS_SEARCH_3_PARAMETERS_QUANT_TYPE_bias_correction	TRUE
RESULTS_SEARCH_3_PARAMETERS_QUANT_TYPE_keep_extreme_peptides_over_fraction	0
RESULTS_SEARCH_3_PARAMETERS_QUANT_TYPE_low_confidence_check	TRUE
RESULTS_SEARCH_3_PARAMETERS_QUANT_TYPE_low_intensity_check	TRUE
RESULTS_SEARCH_3_PARAMETERS_QUANT_TYPE_median_statistic	TRUE
RESULTS_SEARCH_3_PARAMETERS_QUANT_TYPE_mod_check	TRUE
RESULTS_SEARCH_3_PARAMETERS_QUANT_TYPE_quant_threshold	-1
RESULTS_SEARCH_3_PARAMETERS_QUANT_TYPE_quant_threshold_sn	9
RESULTS_SEARCH_3_PARAMETERS_QUANT_TYPE_separate_searches	FALSE
RESULTS_SEARCH_3_PARAMETERS_QUANT_TYPE_shared_msms_check	TRUE
RESULTS_SEARCH_3_PARAMETERS_PARAGON_METHOD_SETTINGS_UI_SAMPLE_TYPE	Identification
RESULTS_SEARCH_3_PARAMETERS_PARAGON_METHOD_SETTINGS_UI_CYS_ALKYLATION	Iodoacetamide w other Cys mods possible
RESULTS_SEARCH_3_PARAMETERS_PARAGON_METHOD_SETTINGS_UI_DIGESTION	Trypsin + Lys C
RESULTS_SEARCH_3_PARAMETERS_PARAGON_METHOD_SETTINGS_UI_SPECIAL_FACTOR	Gel-based ID
RESULTS_SEARCH_3_PARAMETERS_PARAGON_METHOD_SETTINGS_UI_INSTRUMENT	TripleTOF 6600
RESULTS_SEARCH_3_PARAMETERS_PARAGON_METHOD_SETTINGS_UI_SEARCH_EFFORT	Thorough
RESULTS_SEARCH_3_PARAMETERS_PARAGON_METHOD_SETTINGS_UI_USER_NAME	IMB-MASS02\massuser
RESULTS_SEARCH_3_PARAMETERS_PARAGON_METHOD_SETTINGS_UI_MACHINE_NAME	IMB-MASS02
RESULTS_SEARCH_3_PARAMETERS_PARAGON_METHOD_SETTINGS_UI_SEARCH_ID	6.37467e+17
RESULTS_SEARCH_3_PARAMETERS_PARAGON_METHOD_SETTINGS_UI_START_TIME	2021-01-19 16:07:13
RESULTS_SEARCH_3_PARAMETERS_PARAGON_METHOD_SETTINGS_UI_MIN_UNUSED_PROTSCORE	0.0458
RESULTS_SEARCH_3_PARAMETERS_PARAGON_METHOD_SETTINGS_UI_PSPEP	TRUE
RESULTS_SEARCH_4_time_cpu	176967
RESULTS_SEARCH_4_time_duration	226910
RESULTS_SEARCH_4_version	5.0.1.4874
RESULTS_SEARCH_4_xml:id	SEARCH:2:637466692301440684_1
RESULTS_SEARCH_4_PARAMETERS_chemical_data_edited	FALSE
RESULTS_SEARCH_4_PARAMETERS_do_multiprecursor_search	TRUE
RESULTS_SEARCH_4_PARAMETERS_do_reverse_search	TRUE
RESULTS_SEARCH_4_PARAMETERS_max_quant_labels	35
RESULTS_SEARCH_4_PARAMETERS_maxresults	15
RESULTS_SEARCH_4_PARAMETERS_separate_searches	FALSE
RESULTS_SEARCH_4_PARAMETERS_MSTOLERANCE_type	dalton
RESULTS_SEARCH_4_PARAMETERS_MSTOLERANCE_value	0.05
RESULTS_SEARCH_4_PARAMETERS_MSMSTOLERANCE_type	dalton
RESULTS_SEARCH_4_PARAMETERS_MSMSTOLERANCE_value	0.1
RESULTS_SEARCH_4_PARAMETERS_MS_STANDARD_DEVIATION_type	dalton
RESULTS_SEARCH_4_PARAMETERS_MS_STANDARD_DEVIATION_value	0.0011
RESULTS_SEARCH_4_PARAMETERS_MSMS_STANDARD_DEVIATION_type	dalton
RESULTS_SEARCH_4_PARAMETERS_MSMS_STANDARD_DEVIATION_value	0.01
RESULTS_SEARCH_4_PARAMETERS_FASTA_filename	C:\AB SCIEX\ProteinPilot Data\SearchDatabases\uniprot-zebrafish_with_Clover.fasta
RESULTS_SEARCH_4_PARAMETERS_AUTO_CALIBRATION_ms	TRUE
RESULTS_SEARCH_4_PARAMETERS_AUTO_CALIBRATION_msexport	FALSE
RESULTS_SEARCH_4_PARAMETERS_AUTO_CALIBRATION_msms	TRUE
RESULTS_SEARCH_4_PARAMETERS_AUTO_CALIBRATION_msmstolsdratio	2.75
RESULTS_SEARCH_4_PARAMETERS_AUTO_CALIBRATION_mstolsdratio	7
RESULTS_SEARCH_4_PARAMETERS_AUTO_CALIBRATION_squareroot	TRUE
RESULTS_SEARCH_4_PARAMETERS_AUTO_CALIBRATION_type	dalton
RESULTS_SEARCH_4_PARAMETERS_AUTO_CALIBRATION_MCP_d_s_s_f	0.0666667
RESULTS_SEARCH_4_PARAMETERS_AUTO_CALIBRATION_MCP_d_s_w_f	3
RESULTS_SEARCH_4_PARAMETERS_AUTO_CALIBRATION_MCP_m_f_r_mbc	200
RESULTS_SEARCH_4_PARAMETERS_AUTO_CALIBRATION_MCP_m_m_c	10
RESULTS_SEARCH_4_PARAMETERS_AUTO_CALIBRATION_MCP_m_m_f_s	0.25
RESULTS_SEARCH_4_PARAMETERS_AUTO_CALIBRATION_MCP_m_m_p_f	0.33
RESULTS_SEARCH_4_PARAMETERS_AUTO_CALIBRATION_MCP_m_m_p_rms_f	1
RESULTS_SEARCH_4_PARAMETERS_AUTO_CALIBRATION_MCP_m_p_t_f	1
RESULTS_SEARCH_4_PARAMETERS_AUTO_CALIBRATION_MCP_m_r_h_n_b	15
RESULTS_SEARCH_4_PARAMETERS_AUTO_CALIBRATION_MCP_m_z_n_s	99
RESULTS_SEARCH_4_PARAMETERS_AUTO_CALIBRATION_MCP_m_z_s_mn_f_r	0.0666667
RESULTS_SEARCH_4_PARAMETERS_AUTO_CALIBRATION_MCP_m_z_s_mx_f_r	0.1
RESULTS_SEARCH_4_PARAMETERS_MS_AUTO_CALIBRATION_OUT_avres	3.76328e-10
RESULTS_SEARCH_4_PARAMETERS_MS_AUTO_CALIBRATION_OUT_c0	5.62415e-05
RESULTS_SEARCH_4_PARAMETERS_MS_AUTO_CALIBRATION_OUT_c1minus1	-1.14089e-07
RESULTS_SEARCH_4_PARAMETERS_MS_AUTO_CALIBRATION_OUT_c2	0
RESULTS_SEARCH_4_PARAMETERS_MS_AUTO_CALIBRATION_OUT_file	1
RESULTS_SEARCH_4_PARAMETERS_MS_AUTO_CALIBRATION_OUT_partnumber	2
RESULTS_SEARCH_4_PARAMETERS_MS_AUTO_CALIBRATION_OUT_polyorder	1
RESULTS_SEARCH_4_PARAMETERS_MS_AUTO_CALIBRATION_OUT_sample	1
RESULTS_SEARCH_4_PARAMETERS_MS_AUTO_CALIBRATION_OUT_squareroot	TRUE
RESULTS_SEARCH_4_PARAMETERS_MSMS_AUTO_CALIBRATION_OUT_avres	-5.17865e-08
RESULTS_SEARCH_4_PARAMETERS_MSMS_AUTO_CALIBRATION_OUT_c0	-7.0813e-06
RESULTS_SEARCH_4_PARAMETERS_MSMS_AUTO_CALIBRATION_OUT_c1minus1	-1.29099e-07
RESULTS_SEARCH_4_PARAMETERS_MSMS_AUTO_CALIBRATION_OUT_c2	0
RESULTS_SEARCH_4_PARAMETERS_MSMS_AUTO_CALIBRATION_OUT_file	1
RESULTS_SEARCH_4_PARAMETERS_MSMS_AUTO_CALIBRATION_OUT_partnumber	2
RESULTS_SEARCH_4_PARAMETERS_MSMS_AUTO_CALIBRATION_OUT_polyorder	1
RESULTS_SEARCH_4_PARAMETERS_MSMS_AUTO_CALIBRATION_OUT_sample	1
RESULTS_SEARCH_4_PARAMETERS_MSMS_AUTO_CALIBRATION_OUT_squareroot	TRUE
RESULTS_SEARCH_4_PARAMETERS_MAX_PRECURSORS_FRAGLET	5
RESULTS_SEARCH_4_PARAMETERS_MAX_PRECURSORS_TAGLET	1
RESULTS_SEARCH_4_PARAMETERS_PRECURSORS_DR_FRAGLET	10
RESULTS_SEARCH_4_PARAMETERS_PRECURSORS_DR_TAGLET	3
RESULTS_SEARCH_4_PARAMETERS_DEFAULT_CHARGE_STATE_1_charge	2
RESULTS_SEARCH_4_PARAMETERS_DEFAULT_CHARGE_STATE_1_probability	1
RESULTS_SEARCH_4_PARAMETERS_DEFAULT_CHARGE_STATE_2_charge	3
RESULTS_SEARCH_4_PARAMETERS_DEFAULT_CHARGE_STATE_2_probability	1
RESULTS_SEARCH_4_PARAMETERS_DEFAULT_CHARGE_STATE_3_charge	4
RESULTS_SEARCH_4_PARAMETERS_DEFAULT_CHARGE_STATE_3_probability	1
RESULTS_SEARCH_4_PARAMETERS_VERSION	5.0.1.0, 4895
RESULTS_SEARCH_4_PARAMETERS_PARAGON_VERSION	5.0.1.0, 4874
RESULTS_SEARCH_4_PARAMETERS_APPLICATION	ProteinPilot(tm) Software
RESULTS_SEARCH_4_PARAMETERS_PROGROUP_alternativedispositionmaximumfoldprobabilitydrop	100
RESULTS_SEARCH_4_PARAMETERS_PROGROUP_alternativedispositionmaximumfoldscoredrop	2
RESULTS_SEARCH_4_PARAMETERS_PROGROUP_autodiscordantpeptidethreshold	0.3
RESULTS_SEARCH_4_PARAMETERS_PROGROUP_bayesconfidencecalclulation	TRUE
RESULTS_SEARCH_4_PARAMETERS_PROGROUP_calibrateconfidence	TRUE
RESULTS_SEARCH_4_PARAMETERS_PROGROUP_compresspeptides	FALSE
RESULTS_SEARCH_4_PARAMETERS_PROGROUP_confidencepercentthresholdforexcludingothersfromquant	15
RESULTS_SEARCH_4_PARAMETERS_PROGROUP_confidencepercentthresholdforincludingselfinquant	15
RESULTS_SEARCH_4_PARAMETERS_PROGROUP_donotstoremspeaklists	FALSE
RESULTS_SEARCH_4_PARAMETERS_PROGROUP_fasta	C:\AB SCIEX\ProteinPilot Data\SearchDatabases\uniprot-zebrafish_with_Clover.fasta
RESULTS_SEARCH_4_PARAMETERS_PROGROUP_featuregroupminpepconf	0.66
RESULTS_SEARCH_4_PARAMETERS_PROGROUP_featuregroupminups	0.47
RESULTS_SEARCH_4_PARAMETERS_PROGROUP_focusingintersection	4
RESULTS_SEARCH_4_PARAMETERS_PROGROUP_focusingminimummatchconfidence	0.1
RESULTS_SEARCH_4_PARAMETERS_PROGROUP_focusingminunusedprotscore	0.1
RESULTS_SEARCH_4_PARAMETERS_PROGROUP_focusingsubsetcutoff	6
RESULTS_SEARCH_4_PARAMETERS_PROGROUP_intersection	1.3
RESULTS_SEARCH_4_PARAMETERS_PROGROUP_minimummatchconfidencecutoff	0.001
RESULTS_SEARCH_4_PARAMETERS_PROGROUP_minunusedprotscore	0.0458
RESULTS_SEARCH_4_PARAMETERS_PROGROUP_subsetcutoff	2
RESULTS_SEARCH_4_PARAMETERS_PROGROUP_unusedprotscorethresholdforexcludingothersfromquant	1.3
RESULTS_SEARCH_4_PARAMETERS_PEAKLIST_count	2867
RESULTS_SEARCH_4_PARAMETERS_PEAKLIST_filenumber	1
RESULTS_SEARCH_4_PARAMETERS_PEAKLIST_original_count	2867
RESULTS_SEARCH_4_PARAMETERS_PEAKLIST_originalfilename	C:\AB SCIEX\ProteinPilot Data\Results\Albert\ZX 20200429 6600\ZX 20200429 6600 C 1.wiff
RESULTS_SEARCH_4_PARAMETERS_PEAKLIST_partnumber	2
RESULTS_SEARCH_4_PARAMETERS_QUANT_TYPE_background_correction	FALSE
RESULTS_SEARCH_4_PARAMETERS_QUANT_TYPE_bias_correction	TRUE
RESULTS_SEARCH_4_PARAMETERS_QUANT_TYPE_keep_extreme_peptides_over_fraction	0
RESULTS_SEARCH_4_PARAMETERS_QUANT_TYPE_low_confidence_check	TRUE
RESULTS_SEARCH_4_PARAMETERS_QUANT_TYPE_low_intensity_check	TRUE
RESULTS_SEARCH_4_PARAMETERS_QUANT_TYPE_median_statistic	TRUE
RESULTS_SEARCH_4_PARAMETERS_QUANT_TYPE_mod_check	TRUE
RESULTS_SEARCH_4_PARAMETERS_QUANT_TYPE_quant_threshold	-1
RESULTS_SEARCH_4_PARAMETERS_QUANT_TYPE_quant_threshold_sn	9
RESULTS_SEARCH_4_PARAMETERS_QUANT_TYPE_separate_searches	FALSE
RESULTS_SEARCH_4_PARAMETERS_QUANT_TYPE_shared_msms_check	TRUE
RESULTS_SEARCH_4_PARAMETERS_PARAGON_METHOD_SETTINGS_UI_SAMPLE_TYPE	Identification
RESULTS_SEARCH_4_PARAMETERS_PARAGON_METHOD_SETTINGS_UI_CYS_ALKYLATION	Iodoacetamide w other Cys mods possible
RESULTS_SEARCH_4_PARAMETERS_PARAGON_METHOD_SETTINGS_UI_DIGESTION	Trypsin + Lys C
RESULTS_SEARCH_4_PARAMETERS_PARAGON_METHOD_SETTINGS_UI_SPECIAL_FACTOR	Gel-based ID
RESULTS_SEARCH_4_PARAMETERS_PARAGON_METHOD_SETTINGS_UI_INSTRUMENT	TripleTOF 6600
RESULTS_SEARCH_4_PARAMETERS_PARAGON_METHOD_SETTINGS_UI_SEARCH_EFFORT	Thorough
RESULTS_SEARCH_4_PARAMETERS_PARAGON_METHOD_SETTINGS_UI_USER_NAME	IMB-MASS02\massuser
RESULTS_SEARCH_4_PARAMETERS_PARAGON_METHOD_SETTINGS_UI_MACHINE_NAME	IMB-MASS02
RESULTS_SEARCH_4_PARAMETERS_PARAGON_METHOD_SETTINGS_UI_SEARCH_ID	6.37467e+17
RESULTS_SEARCH_4_PARAMETERS_PARAGON_METHOD_SETTINGS_UI_START_TIME	2021-01-19 16:07:13
RESULTS_SEARCH_4_PARAMETERS_PARAGON_METHOD_SETTINGS_UI_MIN_UNUSED_PROTSCORE	0.0458
RESULTS_SEARCH_4_PARAMETERS_PARAGON_METHOD_SETTINGS_UI_PSPEP	TRUE
RESULTS_SEARCH_5_time_cpu	192723
RESULTS_SEARCH_5_time_duration	2712-12-29
RESULTS_SEARCH_5_version	5.0.1.4874
RESULTS_SEARCH_5_xml:id	SEARCH:1:637466692301440684_2
RESULTS_SEARCH_5_PARAMETERS_chemical_data_edited	FALSE
RESULTS_SEARCH_5_PARAMETERS_do_multiprecursor_search	TRUE
RESULTS_SEARCH_5_PARAMETERS_do_reverse_search	TRUE
RESULTS_SEARCH_5_PARAMETERS_max_quant_labels	35
RESULTS_SEARCH_5_PARAMETERS_maxresults	15
RESULTS_SEARCH_5_PARAMETERS_separate_searches	FALSE
RESULTS_SEARCH_5_PARAMETERS_MSTOLERANCE_type	dalton
RESULTS_SEARCH_5_PARAMETERS_MSTOLERANCE_value	0.05
RESULTS_SEARCH_5_PARAMETERS_MSMSTOLERANCE_type	dalton
RESULTS_SEARCH_5_PARAMETERS_MSMSTOLERANCE_value	0.1
RESULTS_SEARCH_5_PARAMETERS_MS_STANDARD_DEVIATION_type	dalton
RESULTS_SEARCH_5_PARAMETERS_MS_STANDARD_DEVIATION_value	0.0011
RESULTS_SEARCH_5_PARAMETERS_MSMS_STANDARD_DEVIATION_type	dalton
RESULTS_SEARCH_5_PARAMETERS_MSMS_STANDARD_DEVIATION_value	0.01
RESULTS_SEARCH_5_PARAMETERS_FASTA_filename	C:\AB SCIEX\ProteinPilot Data\SearchDatabases\uniprot-zebrafish_with_Clover.fasta
RESULTS_SEARCH_5_PARAMETERS_AUTO_CALIBRATION_ms	TRUE
RESULTS_SEARCH_5_PARAMETERS_AUTO_CALIBRATION_msexport	FALSE
RESULTS_SEARCH_5_PARAMETERS_AUTO_CALIBRATION_msms	TRUE
RESULTS_SEARCH_5_PARAMETERS_AUTO_CALIBRATION_msmstolsdratio	2.75
RESULTS_SEARCH_5_PARAMETERS_AUTO_CALIBRATION_mstolsdratio	7
RESULTS_SEARCH_5_PARAMETERS_AUTO_CALIBRATION_squareroot	TRUE
RESULTS_SEARCH_5_PARAMETERS_AUTO_CALIBRATION_type	dalton
RESULTS_SEARCH_5_PARAMETERS_AUTO_CALIBRATION_MCP_d_s_s_f	0.0666667
RESULTS_SEARCH_5_PARAMETERS_AUTO_CALIBRATION_MCP_d_s_w_f	3
RESULTS_SEARCH_5_PARAMETERS_AUTO_CALIBRATION_MCP_m_f_r_mbc	200
RESULTS_SEARCH_5_PARAMETERS_AUTO_CALIBRATION_MCP_m_m_c	10
RESULTS_SEARCH_5_PARAMETERS_AUTO_CALIBRATION_MCP_m_m_f_s	0.25
RESULTS_SEARCH_5_PARAMETERS_AUTO_CALIBRATION_MCP_m_m_p_f	0.33
RESULTS_SEARCH_5_PARAMETERS_AUTO_CALIBRATION_MCP_m_m_p_rms_f	1
RESULTS_SEARCH_5_PARAMETERS_AUTO_CALIBRATION_MCP_m_p_t_f	1
RESULTS_SEARCH_5_PARAMETERS_AUTO_CALIBRATION_MCP_m_r_h_n_b	15
RESULTS_SEARCH_5_PARAMETERS_AUTO_CALIBRATION_MCP_m_z_n_s	99
RESULTS_SEARCH_5_PARAMETERS_AUTO_CALIBRATION_MCP_m_z_s_mn_f_r	0.0666667
RESULTS_SEARCH_5_PARAMETERS_AUTO_CALIBRATION_MCP_m_z_s_mx_f_r	0.1
RESULTS_SEARCH_5_PARAMETERS_MS_AUTO_CALIBRATION_OUT_avres	-8.06041e-10
RESULTS_SEARCH_5_PARAMETERS_MS_AUTO_CALIBRATION_OUT_c0	1.58735e-05
RESULTS_SEARCH_5_PARAMETERS_MS_AUTO_CALIBRATION_OUT_c1minus1	2.11155e-06
RESULTS_SEARCH_5_PARAMETERS_MS_AUTO_CALIBRATION_OUT_c2	0
RESULTS_SEARCH_5_PARAMETERS_MS_AUTO_CALIBRATION_OUT_file	1
RESULTS_SEARCH_5_PARAMETERS_MS_AUTO_CALIBRATION_OUT_partnumber	3
RESULTS_SEARCH_5_PARAMETERS_MS_AUTO_CALIBRATION_OUT_polyorder	1
RESULTS_SEARCH_5_PARAMETERS_MS_AUTO_CALIBRATION_OUT_sample	1
RESULTS_SEARCH_5_PARAMETERS_MS_AUTO_CALIBRATION_OUT_squareroot	TRUE
RESULTS_SEARCH_5_PARAMETERS_MSMS_AUTO_CALIBRATION_OUT_avres	-1.76908e-07
RESULTS_SEARCH_5_PARAMETERS_MSMS_AUTO_CALIBRATION_OUT_c0	2.66357e-05
RESULTS_SEARCH_5_PARAMETERS_MSMS_AUTO_CALIBRATION_OUT_c1minus1	-1.52819e-06
RESULTS_SEARCH_5_PARAMETERS_MSMS_AUTO_CALIBRATION_OUT_c2	0
RESULTS_SEARCH_5_PARAMETERS_MSMS_AUTO_CALIBRATION_OUT_file	1
RESULTS_SEARCH_5_PARAMETERS_MSMS_AUTO_CALIBRATION_OUT_partnumber	3
RESULTS_SEARCH_5_PARAMETERS_MSMS_AUTO_CALIBRATION_OUT_polyorder	1
RESULTS_SEARCH_5_PARAMETERS_MSMS_AUTO_CALIBRATION_OUT_sample	1
RESULTS_SEARCH_5_PARAMETERS_MSMS_AUTO_CALIBRATION_OUT_squareroot	TRUE
RESULTS_SEARCH_5_PARAMETERS_MAX_PRECURSORS_FRAGLET	5
RESULTS_SEARCH_5_PARAMETERS_MAX_PRECURSORS_TAGLET	1
RESULTS_SEARCH_5_PARAMETERS_PRECURSORS_DR_FRAGLET	10
RESULTS_SEARCH_5_PARAMETERS_PRECURSORS_DR_TAGLET	3
RESULTS_SEARCH_5_PARAMETERS_DEFAULT_CHARGE_STATE_1_charge	2
RESULTS_SEARCH_5_PARAMETERS_DEFAULT_CHARGE_STATE_1_probability	1
RESULTS_SEARCH_5_PARAMETERS_DEFAULT_CHARGE_STATE_2_charge	3
RESULTS_SEARCH_5_PARAMETERS_DEFAULT_CHARGE_STATE_2_probability	1
RESULTS_SEARCH_5_PARAMETERS_DEFAULT_CHARGE_STATE_3_charge	4
RESULTS_SEARCH_5_PARAMETERS_DEFAULT_CHARGE_STATE_3_probability	1
RESULTS_SEARCH_5_PARAMETERS_VERSION	5.0.1.0, 4895
RESULTS_SEARCH_5_PARAMETERS_PARAGON_VERSION	5.0.1.0, 4874
RESULTS_SEARCH_5_PARAMETERS_APPLICATION	ProteinPilot(tm) Software
RESULTS_SEARCH_5_PARAMETERS_PROGROUP_alternativedispositionmaximumfoldprobabilitydrop	100
RESULTS_SEARCH_5_PARAMETERS_PROGROUP_alternativedispositionmaximumfoldscoredrop	2
RESULTS_SEARCH_5_PARAMETERS_PROGROUP_autodiscordantpeptidethreshold	0.3
RESULTS_SEARCH_5_PARAMETERS_PROGROUP_bayesconfidencecalclulation	TRUE
RESULTS_SEARCH_5_PARAMETERS_PROGROUP_calibrateconfidence	TRUE
RESULTS_SEARCH_5_PARAMETERS_PROGROUP_compresspeptides	FALSE
RESULTS_SEARCH_5_PARAMETERS_PROGROUP_confidencepercentthresholdforexcludingothersfromquant	15
RESULTS_SEARCH_5_PARAMETERS_PROGROUP_confidencepercentthresholdforincludingselfinquant	15
RESULTS_SEARCH_5_PARAMETERS_PROGROUP_donotstoremspeaklists	FALSE
RESULTS_SEARCH_5_PARAMETERS_PROGROUP_fasta	C:\AB SCIEX\ProteinPilot Data\SearchDatabases\uniprot-zebrafish_with_Clover.fasta
RESULTS_SEARCH_5_PARAMETERS_PROGROUP_featuregroupminpepconf	0.66
RESULTS_SEARCH_5_PARAMETERS_PROGROUP_featuregroupminups	0.47
RESULTS_SEARCH_5_PARAMETERS_PROGROUP_focusingintersection	4
RESULTS_SEARCH_5_PARAMETERS_PROGROUP_focusingminimummatchconfidence	0.1
RESULTS_SEARCH_5_PARAMETERS_PROGROUP_focusingminunusedprotscore	0.1
RESULTS_SEARCH_5_PARAMETERS_PROGROUP_focusingsubsetcutoff	6
RESULTS_SEARCH_5_PARAMETERS_PROGROUP_intersection	1.3
RESULTS_SEARCH_5_PARAMETERS_PROGROUP_minimummatchconfidencecutoff	0.001
RESULTS_SEARCH_5_PARAMETERS_PROGROUP_minunusedprotscore	0.0458
RESULTS_SEARCH_5_PARAMETERS_PROGROUP_subsetcutoff	2
RESULTS_SEARCH_5_PARAMETERS_PROGROUP_unusedprotscorethresholdforexcludingothersfromquant	1.3
RESULTS_SEARCH_5_PARAMETERS_PEAKLIST_count	2869
RESULTS_SEARCH_5_PARAMETERS_PEAKLIST_filenumber	1
RESULTS_SEARCH_5_PARAMETERS_PEAKLIST_original_count	2869
RESULTS_SEARCH_5_PARAMETERS_PEAKLIST_originalfilename	C:\AB SCIEX\ProteinPilot Data\Results\Albert\ZX 20200429 6600\ZX 20200429 6600 C 1.wiff
RESULTS_SEARCH_5_PARAMETERS_PEAKLIST_partnumber	3
RESULTS_SEARCH_5_PARAMETERS_QUANT_TYPE_background_correction	FALSE
RESULTS_SEARCH_5_PARAMETERS_QUANT_TYPE_bias_correction	TRUE
RESULTS_SEARCH_5_PARAMETERS_QUANT_TYPE_keep_extreme_peptides_over_fraction	0
RESULTS_SEARCH_5_PARAMETERS_QUANT_TYPE_low_confidence_check	TRUE
RESULTS_SEARCH_5_PARAMETERS_QUANT_TYPE_low_intensity_check	TRUE
RESULTS_SEARCH_5_PARAMETERS_QUANT_TYPE_median_statistic	TRUE
RESULTS_SEARCH_5_PARAMETERS_QUANT_TYPE_mod_check	TRUE
RESULTS_SEARCH_5_PARAMETERS_QUANT_TYPE_quant_threshold	-1
RESULTS_SEARCH_5_PARAMETERS_QUANT_TYPE_quant_threshold_sn	9
RESULTS_SEARCH_5_PARAMETERS_QUANT_TYPE_separate_searches	FALSE
RESULTS_SEARCH_5_PARAMETERS_QUANT_TYPE_shared_msms_check	TRUE
RESULTS_SEARCH_5_PARAMETERS_PARAGON_METHOD_SETTINGS_UI_SAMPLE_TYPE	Identification
RESULTS_SEARCH_5_PARAMETERS_PARAGON_METHOD_SETTINGS_UI_CYS_ALKYLATION	Iodoacetamide w other Cys mods possible
RESULTS_SEARCH_5_PARAMETERS_PARAGON_METHOD_SETTINGS_UI_DIGESTION	Trypsin + Lys C
RESULTS_SEARCH_5_PARAMETERS_PARAGON_METHOD_SETTINGS_UI_SPECIAL_FACTOR	Gel-based ID
RESULTS_SEARCH_5_PARAMETERS_PARAGON_METHOD_SETTINGS_UI_INSTRUMENT	TripleTOF 6600
RESULTS_SEARCH_5_PARAMETERS_PARAGON_METHOD_SETTINGS_UI_SEARCH_EFFORT	Thorough
RESULTS_SEARCH_5_PARAMETERS_PARAGON_METHOD_SETTINGS_UI_USER_NAME	IMB-MASS02\massuser
RESULTS_SEARCH_5_PARAMETERS_PARAGON_METHOD_SETTINGS_UI_MACHINE_NAME	IMB-MASS02
RESULTS_SEARCH_5_PARAMETERS_PARAGON_METHOD_SETTINGS_UI_SEARCH_ID	6.37467e+17
RESULTS_SEARCH_5_PARAMETERS_PARAGON_METHOD_SETTINGS_UI_START_TIME	2021-01-19 16:07:13
RESULTS_SEARCH_5_PARAMETERS_PARAGON_METHOD_SETTINGS_UI_MIN_UNUSED_PROTSCORE	0.0458
RESULTS_SEARCH_5_PARAMETERS_PARAGON_METHOD_SETTINGS_UI_PSPEP	TRUE
RESULTS_SEARCH_6_time_cpu	441701
RESULTS_SEARCH_6_time_duration	466567
RESULTS_SEARCH_6_version	5.0.1.4874
RESULTS_SEARCH_6_xml:id	SEARCH:2:637466692301440684_2
RESULTS_SEARCH_6_PARAMETERS_chemical_data_edited	FALSE
RESULTS_SEARCH_6_PARAMETERS_do_multiprecursor_search	TRUE
RESULTS_SEARCH_6_PARAMETERS_do_reverse_search	TRUE
RESULTS_SEARCH_6_PARAMETERS_max_quant_labels	35
RESULTS_SEARCH_6_PARAMETERS_maxresults	15
RESULTS_SEARCH_6_PARAMETERS_separate_searches	FALSE
RESULTS_SEARCH_6_PARAMETERS_MSTOLERANCE_type	dalton
RESULTS_SEARCH_6_PARAMETERS_MSTOLERANCE_value	0.05
RESULTS_SEARCH_6_PARAMETERS_MSMSTOLERANCE_type	dalton
RESULTS_SEARCH_6_PARAMETERS_MSMSTOLERANCE_value	0.1
RESULTS_SEARCH_6_PARAMETERS_MS_STANDARD_DEVIATION_type	dalton
RESULTS_SEARCH_6_PARAMETERS_MS_STANDARD_DEVIATION_value	0.0011
RESULTS_SEARCH_6_PARAMETERS_MSMS_STANDARD_DEVIATION_type	dalton
RESULTS_SEARCH_6_PARAMETERS_MSMS_STANDARD_DEVIATION_value	0.01
RESULTS_SEARCH_6_PARAMETERS_FASTA_filename	C:\AB SCIEX\ProteinPilot Data\SearchDatabases\uniprot-zebrafish_with_Clover.fasta
RESULTS_SEARCH_6_PARAMETERS_AUTO_CALIBRATION_ms	TRUE
RESULTS_SEARCH_6_PARAMETERS_AUTO_CALIBRATION_msexport	FALSE
RESULTS_SEARCH_6_PARAMETERS_AUTO_CALIBRATION_msms	TRUE
RESULTS_SEARCH_6_PARAMETERS_AUTO_CALIBRATION_msmstolsdratio	2.75
RESULTS_SEARCH_6_PARAMETERS_AUTO_CALIBRATION_mstolsdratio	7
RESULTS_SEARCH_6_PARAMETERS_AUTO_CALIBRATION_squareroot	TRUE
RESULTS_SEARCH_6_PARAMETERS_AUTO_CALIBRATION_type	dalton
RESULTS_SEARCH_6_PARAMETERS_AUTO_CALIBRATION_MCP_d_s_s_f	0.0666667
RESULTS_SEARCH_6_PARAMETERS_AUTO_CALIBRATION_MCP_d_s_w_f	3
RESULTS_SEARCH_6_PARAMETERS_AUTO_CALIBRATION_MCP_m_f_r_mbc	200
RESULTS_SEARCH_6_PARAMETERS_AUTO_CALIBRATION_MCP_m_m_c	10
RESULTS_SEARCH_6_PARAMETERS_AUTO_CALIBRATION_MCP_m_m_f_s	0.25
RESULTS_SEARCH_6_PARAMETERS_AUTO_CALIBRATION_MCP_m_m_p_f	0.33
RESULTS_SEARCH_6_PARAMETERS_AUTO_CALIBRATION_MCP_m_m_p_rms_f	1
RESULTS_SEARCH_6_PARAMETERS_AUTO_CALIBRATION_MCP_m_p_t_f	1
RESULTS_SEARCH_6_PARAMETERS_AUTO_CALIBRATION_MCP_m_r_h_n_b	15
RESULTS_SEARCH_6_PARAMETERS_AUTO_CALIBRATION_MCP_m_z_n_s	99
RESULTS_SEARCH_6_PARAMETERS_AUTO_CALIBRATION_MCP_m_z_s_mn_f_r	0.0666667
RESULTS_SEARCH_6_PARAMETERS_AUTO_CALIBRATION_MCP_m_z_s_mx_f_r	0.1
RESULTS_SEARCH_6_PARAMETERS_MS_AUTO_CALIBRATION_OUT_avres	-8.06041e-10
RESULTS_SEARCH_6_PARAMETERS_MS_AUTO_CALIBRATION_OUT_c0	1.58735e-05
RESULTS_SEARCH_6_PARAMETERS_MS_AUTO_CALIBRATION_OUT_c1minus1	2.11155e-06
RESULTS_SEARCH_6_PARAMETERS_MS_AUTO_CALIBRATION_OUT_c2	0
RESULTS_SEARCH_6_PARAMETERS_MS_AUTO_CALIBRATION_OUT_file	1
RESULTS_SEARCH_6_PARAMETERS_MS_AUTO_CALIBRATION_OUT_partnumber	3
RESULTS_SEARCH_6_PARAMETERS_MS_AUTO_CALIBRATION_OUT_polyorder	1
RESULTS_SEARCH_6_PARAMETERS_MS_AUTO_CALIBRATION_OUT_sample	1
RESULTS_SEARCH_6_PARAMETERS_MS_AUTO_CALIBRATION_OUT_squareroot	TRUE
RESULTS_SEARCH_6_PARAMETERS_MSMS_AUTO_CALIBRATION_OUT_avres	-1.76908e-07
RESULTS_SEARCH_6_PARAMETERS_MSMS_AUTO_CALIBRATION_OUT_c0	2.66357e-05
RESULTS_SEARCH_6_PARAMETERS_MSMS_AUTO_CALIBRATION_OUT_c1minus1	-1.52819e-06
RESULTS_SEARCH_6_PARAMETERS_MSMS_AUTO_CALIBRATION_OUT_c2	0
RESULTS_SEARCH_6_PARAMETERS_MSMS_AUTO_CALIBRATION_OUT_file	1
RESULTS_SEARCH_6_PARAMETERS_MSMS_AUTO_CALIBRATION_OUT_partnumber	3
RESULTS_SEARCH_6_PARAMETERS_MSMS_AUTO_CALIBRATION_OUT_polyorder	1
RESULTS_SEARCH_6_PARAMETERS_MSMS_AUTO_CALIBRATION_OUT_sample	1
RESULTS_SEARCH_6_PARAMETERS_MSMS_AUTO_CALIBRATION_OUT_squareroot	TRUE
RESULTS_SEARCH_6_PARAMETERS_MAX_PRECURSORS_FRAGLET	5
RESULTS_SEARCH_6_PARAMETERS_MAX_PRECURSORS_TAGLET	1
RESULTS_SEARCH_6_PARAMETERS_PRECURSORS_DR_FRAGLET	10
RESULTS_SEARCH_6_PARAMETERS_PRECURSORS_DR_TAGLET	3
RESULTS_SEARCH_6_PARAMETERS_DEFAULT_CHARGE_STATE_1_charge	2
RESULTS_SEARCH_6_PARAMETERS_DEFAULT_CHARGE_STATE_1_probability	1
RESULTS_SEARCH_6_PARAMETERS_DEFAULT_CHARGE_STATE_2_charge	3
RESULTS_SEARCH_6_PARAMETERS_DEFAULT_CHARGE_STATE_2_probability	1900-01-01
RESULTS_SEARCH_6_PARAMETERS_DEFAULT_CHARGE_STATE_3_charge	4
RESULTS_SEARCH_6_PARAMETERS_DEFAULT_CHARGE_STATE_3_probability	1
RESULTS_SEARCH_6_PARAMETERS_VERSION	5.0.1.0, 4895
RESULTS_SEARCH_6_PARAMETERS_PARAGON_VERSION	5.0.1.0, 4874
RESULTS_SEARCH_6_PARAMETERS_APPLICATION	ProteinPilot(tm) Software
RESULTS_SEARCH_6_PARAMETERS_PROGROUP_alternativedispositionmaximumfoldprobabilitydrop	100
RESULTS_SEARCH_6_PARAMETERS_PROGROUP_alternativedispositionmaximumfoldscoredrop	2
RESULTS_SEARCH_6_PARAMETERS_PROGROUP_autodiscordantpeptidethreshold	0.3
RESULTS_SEARCH_6_PARAMETERS_PROGROUP_bayesconfidencecalclulation	TRUE
RESULTS_SEARCH_6_PARAMETERS_PROGROUP_calibrateconfidence	TRUE
RESULTS_SEARCH_6_PARAMETERS_PROGROUP_compresspeptides	FALSE
RESULTS_SEARCH_6_PARAMETERS_PROGROUP_confidencepercentthresholdforexcludingothersfromquant	15
RESULTS_SEARCH_6_PARAMETERS_PROGROUP_confidencepercentthresholdforincludingselfinquant	15
RESULTS_SEARCH_6_PARAMETERS_PROGROUP_donotstoremspeaklists	FALSE
RESULTS_SEARCH_6_PARAMETERS_PROGROUP_fasta	C:\AB SCIEX\ProteinPilot Data\SearchDatabases\uniprot-zebrafish_with_Clover.fasta
RESULTS_SEARCH_6_PARAMETERS_PROGROUP_featuregroupminpepconf	0.66
RESULTS_SEARCH_6_PARAMETERS_PROGROUP_featuregroupminups	0.47
RESULTS_SEARCH_6_PARAMETERS_PROGROUP_focusingintersection	4
RESULTS_SEARCH_6_PARAMETERS_PROGROUP_focusingminimummatchconfidence	0.1
RESULTS_SEARCH_6_PARAMETERS_PROGROUP_focusingminunusedprotscore	0.1
RESULTS_SEARCH_6_PARAMETERS_PROGROUP_focusingsubsetcutoff	6
RESULTS_SEARCH_6_PARAMETERS_PROGROUP_intersection	1.3
RESULTS_SEARCH_6_PARAMETERS_PROGROUP_minimummatchconfidencecutoff	0.001
RESULTS_SEARCH_6_PARAMETERS_PROGROUP_minunusedprotscore	0.0458
RESULTS_SEARCH_6_PARAMETERS_PROGROUP_subsetcutoff	2
RESULTS_SEARCH_6_PARAMETERS_PROGROUP_unusedprotscorethresholdforexcludingothersfromquant	1.3
RESULTS_SEARCH_6_PARAMETERS_PEAKLIST_count	2869
RESULTS_SEARCH_6_PARAMETERS_PEAKLIST_filenumber	1
RESULTS_SEARCH_6_PARAMETERS_PEAKLIST_original_count	2869
RESULTS_SEARCH_6_PARAMETERS_PEAKLIST_originalfilename	C:\AB SCIEX\ProteinPilot Data\Results\Albert\ZX 20200429 6600\ZX 20200429 6600 C 1.wiff
RESULTS_SEARCH_6_PARAMETERS_PEAKLIST_partnumber	3
RESULTS_SEARCH_6_PARAMETERS_QUANT_TYPE_background_correction	FALSE
RESULTS_SEARCH_6_PARAMETERS_QUANT_TYPE_bias_correction	TRUE
RESULTS_SEARCH_6_PARAMETERS_QUANT_TYPE_keep_extreme_peptides_over_fraction	0
RESULTS_SEARCH_6_PARAMETERS_QUANT_TYPE_low_confidence_check	TRUE
RESULTS_SEARCH_6_PARAMETERS_QUANT_TYPE_low_intensity_check	TRUE
RESULTS_SEARCH_6_PARAMETERS_QUANT_TYPE_median_statistic	TRUE
RESULTS_SEARCH_6_PARAMETERS_QUANT_TYPE_mod_check	TRUE
RESULTS_SEARCH_6_PARAMETERS_QUANT_TYPE_quant_threshold	-1
RESULTS_SEARCH_6_PARAMETERS_QUANT_TYPE_quant_threshold_sn	9
RESULTS_SEARCH_6_PARAMETERS_QUANT_TYPE_separate_searches	FALSE
RESULTS_SEARCH_6_PARAMETERS_QUANT_TYPE_shared_msms_check	TRUE
RESULTS_SEARCH_6_PARAMETERS_PARAGON_METHOD_SETTINGS_UI_SAMPLE_TYPE	Identification
RESULTS_SEARCH_6_PARAMETERS_PARAGON_METHOD_SETTINGS_UI_CYS_ALKYLATION	Iodoacetamide w other Cys mods possible
RESULTS_SEARCH_6_PARAMETERS_PARAGON_METHOD_SETTINGS_UI_DIGESTION	Trypsin + Lys C
RESULTS_SEARCH_6_PARAMETERS_PARAGON_METHOD_SETTINGS_UI_SPECIAL_FACTOR	Gel-based ID
RESULTS_SEARCH_6_PARAMETERS_PARAGON_METHOD_SETTINGS_UI_INSTRUMENT	TripleTOF 6600
RESULTS_SEARCH_6_PARAMETERS_PARAGON_METHOD_SETTINGS_UI_SEARCH_EFFORT	Thorough
RESULTS_SEARCH_6_PARAMETERS_PARAGON_METHOD_SETTINGS_UI_USER_NAME	IMB-MASS02\massuser
RESULTS_SEARCH_6_PARAMETERS_PARAGON_METHOD_SETTINGS_UI_MACHINE_NAME	IMB-MASS02
RESULTS_SEARCH_6_PARAMETERS_PARAGON_METHOD_SETTINGS_UI_SEARCH_ID	6.37467e+17
RESULTS_SEARCH_6_PARAMETERS_PARAGON_METHOD_SETTINGS_UI_START_TIME	2021-01-19 16:07:13
RESULTS_SEARCH_6_PARAMETERS_PARAGON_METHOD_SETTINGS_UI_MIN_UNUSED_PROTSCORE	0.0458
RESULTS_SEARCH_6_PARAMETERS_PARAGON_METHOD_SETTINGS_UI_PSPEP	TRUE
RESULTS_SEARCH_7_time_cpu	157093
RESULTS_SEARCH_7_time_duration	188517
RESULTS_SEARCH_7_version	5.0.1.4874
RESULTS_SEARCH_7_xml:id	SEARCH:1:637466692301440684_3
RESULTS_SEARCH_7_PARAMETERS_chemical_data_edited	FALSE
RESULTS_SEARCH_7_PARAMETERS_do_multiprecursor_search	TRUE
RESULTS_SEARCH_7_PARAMETERS_do_reverse_search	TRUE
RESULTS_SEARCH_7_PARAMETERS_max_quant_labels	35
RESULTS_SEARCH_7_PARAMETERS_maxresults	15
RESULTS_SEARCH_7_PARAMETERS_separate_searches	FALSE
RESULTS_SEARCH_7_PARAMETERS_MSTOLERANCE_type	dalton
RESULTS_SEARCH_7_PARAMETERS_MSTOLERANCE_value	0.05
RESULTS_SEARCH_7_PARAMETERS_MSMSTOLERANCE_type	dalton
RESULTS_SEARCH_7_PARAMETERS_MSMSTOLERANCE_value	0.1
RESULTS_SEARCH_7_PARAMETERS_MS_STANDARD_DEVIATION_type	dalton
RESULTS_SEARCH_7_PARAMETERS_MS_STANDARD_DEVIATION_value	0.0011
RESULTS_SEARCH_7_PARAMETERS_MSMS_STANDARD_DEVIATION_type	dalton
RESULTS_SEARCH_7_PARAMETERS_MSMS_STANDARD_DEVIATION_value	0.01
RESULTS_SEARCH_7_PARAMETERS_FASTA_filename	C:\AB SCIEX\ProteinPilot Data\SearchDatabases\uniprot-zebrafish_with_Clover.fasta
RESULTS_SEARCH_7_PARAMETERS_AUTO_CALIBRATION_ms	TRUE
RESULTS_SEARCH_7_PARAMETERS_AUTO_CALIBRATION_msexport	FALSE
RESULTS_SEARCH_7_PARAMETERS_AUTO_CALIBRATION_msms	TRUE
RESULTS_SEARCH_7_PARAMETERS_AUTO_CALIBRATION_msmstolsdratio	2.75
RESULTS_SEARCH_7_PARAMETERS_AUTO_CALIBRATION_mstolsdratio	7
RESULTS_SEARCH_7_PARAMETERS_AUTO_CALIBRATION_squareroot	TRUE
RESULTS_SEARCH_7_PARAMETERS_AUTO_CALIBRATION_type	dalton
RESULTS_SEARCH_7_PARAMETERS_AUTO_CALIBRATION_MCP_d_s_s_f	0.0666667
RESULTS_SEARCH_7_PARAMETERS_AUTO_CALIBRATION_MCP_d_s_w_f	3
RESULTS_SEARCH_7_PARAMETERS_AUTO_CALIBRATION_MCP_m_f_r_mbc	200
RESULTS_SEARCH_7_PARAMETERS_AUTO_CALIBRATION_MCP_m_m_c	10
RESULTS_SEARCH_7_PARAMETERS_AUTO_CALIBRATION_MCP_m_m_f_s	0.25
RESULTS_SEARCH_7_PARAMETERS_AUTO_CALIBRATION_MCP_m_m_p_f	0.33
RESULTS_SEARCH_7_PARAMETERS_AUTO_CALIBRATION_MCP_m_m_p_rms_f	1
RESULTS_SEARCH_7_PARAMETERS_AUTO_CALIBRATION_MCP_m_p_t_f	1
RESULTS_SEARCH_7_PARAMETERS_AUTO_CALIBRATION_MCP_m_r_h_n_b	15
RESULTS_SEARCH_7_PARAMETERS_AUTO_CALIBRATION_MCP_m_z_n_s	99
RESULTS_SEARCH_7_PARAMETERS_AUTO_CALIBRATION_MCP_m_z_s_mn_f_r	0.0666667
RESULTS_SEARCH_7_PARAMETERS_AUTO_CALIBRATION_MCP_m_z_s_mx_f_r	0.1
RESULTS_SEARCH_7_PARAMETERS_MS_AUTO_CALIBRATION_OUT_avres	-4.13482e-09
RESULTS_SEARCH_7_PARAMETERS_MS_AUTO_CALIBRATION_OUT_c0	6.15884e-05
RESULTS_SEARCH_7_PARAMETERS_MS_AUTO_CALIBRATION_OUT_c1minus1	-5.24796e-07
RESULTS_SEARCH_7_PARAMETERS_MS_AUTO_CALIBRATION_OUT_c2	0
RESULTS_SEARCH_7_PARAMETERS_MS_AUTO_CALIBRATION_OUT_file	2
RESULTS_SEARCH_7_PARAMETERS_MS_AUTO_CALIBRATION_OUT_partnumber	4
RESULTS_SEARCH_7_PARAMETERS_MS_AUTO_CALIBRATION_OUT_polyorder	1
RESULTS_SEARCH_7_PARAMETERS_MS_AUTO_CALIBRATION_OUT_sample	1
RESULTS_SEARCH_7_PARAMETERS_MS_AUTO_CALIBRATION_OUT_squareroot	TRUE
RESULTS_SEARCH_7_PARAMETERS_MSMS_AUTO_CALIBRATION_OUT_avres	-3.60734e-08
RESULTS_SEARCH_7_PARAMETERS_MSMS_AUTO_CALIBRATION_OUT_c0	-2.93871e-07
RESULTS_SEARCH_7_PARAMETERS_MSMS_AUTO_CALIBRATION_OUT_c1minus1	3.97945e-07
RESULTS_SEARCH_7_PARAMETERS_MSMS_AUTO_CALIBRATION_OUT_c2	0
RESULTS_SEARCH_7_PARAMETERS_MSMS_AUTO_CALIBRATION_OUT_file	2
RESULTS_SEARCH_7_PARAMETERS_MSMS_AUTO_CALIBRATION_OUT_partnumber	4
RESULTS_SEARCH_7_PARAMETERS_MSMS_AUTO_CALIBRATION_OUT_polyorder	1
RESULTS_SEARCH_7_PARAMETERS_MSMS_AUTO_CALIBRATION_OUT_sample	1
RESULTS_SEARCH_7_PARAMETERS_MSMS_AUTO_CALIBRATION_OUT_squareroot	TRUE
RESULTS_SEARCH_7_PARAMETERS_MAX_PRECURSORS_FRAGLET	5
RESULTS_SEARCH_7_PARAMETERS_MAX_PRECURSORS_TAGLET	1
RESULTS_SEARCH_7_PARAMETERS_PRECURSORS_DR_FRAGLET	10
RESULTS_SEARCH_7_PARAMETERS_PRECURSORS_DR_TAGLET	3
RESULTS_SEARCH_7_PARAMETERS_DEFAULT_CHARGE_STATE_1_charge	2
RESULTS_SEARCH_7_PARAMETERS_DEFAULT_CHARGE_STATE_1_probability	1
RESULTS_SEARCH_7_PARAMETERS_DEFAULT_CHARGE_STATE_2_charge	3
RESULTS_SEARCH_7_PARAMETERS_DEFAULT_CHARGE_STATE_2_probability	1
RESULTS_SEARCH_7_PARAMETERS_DEFAULT_CHARGE_STATE_3_charge	4
RESULTS_SEARCH_7_PARAMETERS_DEFAULT_CHARGE_STATE_3_probability	1
RESULTS_SEARCH_7_PARAMETERS_VERSION	5.0.1.0, 4895
RESULTS_SEARCH_7_PARAMETERS_PARAGON_VERSION	5.0.1.0, 4874
RESULTS_SEARCH_7_PARAMETERS_APPLICATION	ProteinPilot(tm) Software
RESULTS_SEARCH_7_PARAMETERS_PROGROUP_alternativedispositionmaximumfoldprobabilitydrop	100
RESULTS_SEARCH_7_PARAMETERS_PROGROUP_alternativedispositionmaximumfoldscoredrop	2
RESULTS_SEARCH_7_PARAMETERS_PROGROUP_autodiscordantpeptidethreshold	0.3
RESULTS_SEARCH_7_PARAMETERS_PROGROUP_bayesconfidencecalclulation	TRUE
RESULTS_SEARCH_7_PARAMETERS_PROGROUP_calibrateconfidence	TRUE
RESULTS_SEARCH_7_PARAMETERS_PROGROUP_compresspeptides	FALSE
RESULTS_SEARCH_7_PARAMETERS_PROGROUP_confidencepercentthresholdforexcludingothersfromquant	15
RESULTS_SEARCH_7_PARAMETERS_PROGROUP_confidencepercentthresholdforincludingselfinquant	15
RESULTS_SEARCH_7_PARAMETERS_PROGROUP_donotstoremspeaklists	FALSE
RESULTS_SEARCH_7_PARAMETERS_PROGROUP_fasta	C:\AB SCIEX\ProteinPilot Data\SearchDatabases\uniprot-zebrafish_with_Clover.fasta
RESULTS_SEARCH_7_PARAMETERS_PROGROUP_featuregroupminpepconf	0.66
RESULTS_SEARCH_7_PARAMETERS_PROGROUP_featuregroupminups	0.47
RESULTS_SEARCH_7_PARAMETERS_PROGROUP_focusingintersection	4
RESULTS_SEARCH_7_PARAMETERS_PROGROUP_focusingminimummatchconfidence	0.1
RESULTS_SEARCH_7_PARAMETERS_PROGROUP_focusingminunusedprotscore	0.1
RESULTS_SEARCH_7_PARAMETERS_PROGROUP_focusingsubsetcutoff	6
RESULTS_SEARCH_7_PARAMETERS_PROGROUP_intersection	1.3
RESULTS_SEARCH_7_PARAMETERS_PROGROUP_minimummatchconfidencecutoff	0.001
RESULTS_SEARCH_7_PARAMETERS_PROGROUP_minunusedprotscore	0.0458
RESULTS_SEARCH_7_PARAMETERS_PROGROUP_subsetcutoff	2
RESULTS_SEARCH_7_PARAMETERS_PROGROUP_unusedprotscorethresholdforexcludingothersfromquant	1.3
RESULTS_SEARCH_7_PARAMETERS_PEAKLIST_count	3355
RESULTS_SEARCH_7_PARAMETERS_PEAKLIST_filenumber	2
RESULTS_SEARCH_7_PARAMETERS_PEAKLIST_original_count	3355
RESULTS_SEARCH_7_PARAMETERS_PEAKLIST_originalfilename	C:\AB SCIEX\ProteinPilot Data\Results\Albert\ZX 20200429 6600\ZX 20200429 6600 C 2.wiff
RESULTS_SEARCH_7_PARAMETERS_PEAKLIST_partnumber	4
RESULTS_SEARCH_7_PARAMETERS_QUANT_TYPE_background_correction	FALSE
RESULTS_SEARCH_7_PARAMETERS_QUANT_TYPE_bias_correction	TRUE
RESULTS_SEARCH_7_PARAMETERS_QUANT_TYPE_keep_extreme_peptides_over_fraction	0
RESULTS_SEARCH_7_PARAMETERS_QUANT_TYPE_low_confidence_check	TRUE
RESULTS_SEARCH_7_PARAMETERS_QUANT_TYPE_low_intensity_check	TRUE
RESULTS_SEARCH_7_PARAMETERS_QUANT_TYPE_median_statistic	TRUE
RESULTS_SEARCH_7_PARAMETERS_QUANT_TYPE_mod_check	TRUE
RESULTS_SEARCH_7_PARAMETERS_QUANT_TYPE_quant_threshold	-1
RESULTS_SEARCH_7_PARAMETERS_QUANT_TYPE_quant_threshold_sn	9
RESULTS_SEARCH_7_PARAMETERS_QUANT_TYPE_separate_searches	FALSE
RESULTS_SEARCH_7_PARAMETERS_QUANT_TYPE_shared_msms_check	TRUE
RESULTS_SEARCH_7_PARAMETERS_PARAGON_METHOD_SETTINGS_UI_SAMPLE_TYPE	Identification
RESULTS_SEARCH_7_PARAMETERS_PARAGON_METHOD_SETTINGS_UI_CYS_ALKYLATION	Iodoacetamide w other Cys mods possible
RESULTS_SEARCH_7_PARAMETERS_PARAGON_METHOD_SETTINGS_UI_DIGESTION	Trypsin + Lys C
RESULTS_SEARCH_7_PARAMETERS_PARAGON_METHOD_SETTINGS_UI_SPECIAL_FACTOR	Gel-based ID
RESULTS_SEARCH_7_PARAMETERS_PARAGON_METHOD_SETTINGS_UI_INSTRUMENT	TripleTOF 6600
RESULTS_SEARCH_7_PARAMETERS_PARAGON_METHOD_SETTINGS_UI_SEARCH_EFFORT	Thorough
RESULTS_SEARCH_7_PARAMETERS_PARAGON_METHOD_SETTINGS_UI_USER_NAME	IMB-MASS02\massuser
RESULTS_SEARCH_7_PARAMETERS_PARAGON_METHOD_SETTINGS_UI_MACHINE_NAME	IMB-MASS02
RESULTS_SEARCH_7_PARAMETERS_PARAGON_METHOD_SETTINGS_UI_SEARCH_ID	6.37467e+17
RESULTS_SEARCH_7_PARAMETERS_PARAGON_METHOD_SETTINGS_UI_START_TIME	2021-01-19 16:07:13
RESULTS_SEARCH_7_PARAMETERS_PARAGON_METHOD_SETTINGS_UI_MIN_UNUSED_PROTSCORE	0.0458
RESULTS_SEARCH_7_PARAMETERS_PARAGON_METHOD_SETTINGS_UI_PSPEP	TRUE
RESULTS_SEARCH_8_time_cpu	186561
RESULTS_SEARCH_8_time_duration	210483
RESULTS_SEARCH_8_version	5.0.1.4874
RESULTS_SEARCH_8_xml:id	SEARCH:2:637466692301440684_3
RESULTS_SEARCH_8_PARAMETERS_chemical_data_edited	FALSE
RESULTS_SEARCH_8_PARAMETERS_do_multiprecursor_search	TRUE
RESULTS_SEARCH_8_PARAMETERS_do_reverse_search	TRUE
RESULTS_SEARCH_8_PARAMETERS_max_quant_labels	35
RESULTS_SEARCH_8_PARAMETERS_maxresults	15
RESULTS_SEARCH_8_PARAMETERS_separate_searches	FALSE
RESULTS_SEARCH_8_PARAMETERS_MSTOLERANCE_type	dalton
RESULTS_SEARCH_8_PARAMETERS_MSTOLERANCE_value	0.05
RESULTS_SEARCH_8_PARAMETERS_MSMSTOLERANCE_type	dalton
RESULTS_SEARCH_8_PARAMETERS_MSMSTOLERANCE_value	0.1
RESULTS_SEARCH_8_PARAMETERS_MS_STANDARD_DEVIATION_type	dalton
RESULTS_SEARCH_8_PARAMETERS_MS_STANDARD_DEVIATION_value	0.0011
RESULTS_SEARCH_8_PARAMETERS_MSMS_STANDARD_DEVIATION_type	dalton
RESULTS_SEARCH_8_PARAMETERS_MSMS_STANDARD_DEVIATION_value	0.01
RESULTS_SEARCH_8_PARAMETERS_FASTA_filename	C:\AB SCIEX\ProteinPilot Data\SearchDatabases\uniprot-zebrafish_with_Clover.fasta
RESULTS_SEARCH_8_PARAMETERS_AUTO_CALIBRATION_ms	TRUE
RESULTS_SEARCH_8_PARAMETERS_AUTO_CALIBRATION_msexport	FALSE
RESULTS_SEARCH_8_PARAMETERS_AUTO_CALIBRATION_msms	TRUE
RESULTS_SEARCH_8_PARAMETERS_AUTO_CALIBRATION_msmstolsdratio	2.75
RESULTS_SEARCH_8_PARAMETERS_AUTO_CALIBRATION_mstolsdratio	7
RESULTS_SEARCH_8_PARAMETERS_AUTO_CALIBRATION_squareroot	TRUE
RESULTS_SEARCH_8_PARAMETERS_AUTO_CALIBRATION_type	dalton
RESULTS_SEARCH_8_PARAMETERS_AUTO_CALIBRATION_MCP_d_s_s_f	0.0666667
RESULTS_SEARCH_8_PARAMETERS_AUTO_CALIBRATION_MCP_d_s_w_f	3
RESULTS_SEARCH_8_PARAMETERS_AUTO_CALIBRATION_MCP_m_f_r_mbc	200
RESULTS_SEARCH_8_PARAMETERS_AUTO_CALIBRATION_MCP_m_m_c	10
RESULTS_SEARCH_8_PARAMETERS_AUTO_CALIBRATION_MCP_m_m_f_s	0.25
RESULTS_SEARCH_8_PARAMETERS_AUTO_CALIBRATION_MCP_m_m_p_f	0.33
RESULTS_SEARCH_8_PARAMETERS_AUTO_CALIBRATION_MCP_m_m_p_rms_f	1
RESULTS_SEARCH_8_PARAMETERS_AUTO_CALIBRATION_MCP_m_p_t_f	1
RESULTS_SEARCH_8_PARAMETERS_AUTO_CALIBRATION_MCP_m_r_h_n_b	15
RESULTS_SEARCH_8_PARAMETERS_AUTO_CALIBRATION_MCP_m_z_n_s	99
RESULTS_SEARCH_8_PARAMETERS_AUTO_CALIBRATION_MCP_m_z_s_mn_f_r	0.0666667
RESULTS_SEARCH_8_PARAMETERS_AUTO_CALIBRATION_MCP_m_z_s_mx_f_r	0.1
RESULTS_SEARCH_8_PARAMETERS_MS_AUTO_CALIBRATION_OUT_avres	-4.13482e-09
RESULTS_SEARCH_8_PARAMETERS_MS_AUTO_CALIBRATION_OUT_c0	6.15884e-05
RESULTS_SEARCH_8_PARAMETERS_MS_AUTO_CALIBRATION_OUT_c1minus1	-5.24796e-07
RESULTS_SEARCH_8_PARAMETERS_MS_AUTO_CALIBRATION_OUT_c2	0
RESULTS_SEARCH_8_PARAMETERS_MS_AUTO_CALIBRATION_OUT_file	2
RESULTS_SEARCH_8_PARAMETERS_MS_AUTO_CALIBRATION_OUT_partnumber	4
RESULTS_SEARCH_8_PARAMETERS_MS_AUTO_CALIBRATION_OUT_polyorder	1
RESULTS_SEARCH_8_PARAMETERS_MS_AUTO_CALIBRATION_OUT_sample	1
RESULTS_SEARCH_8_PARAMETERS_MS_AUTO_CALIBRATION_OUT_squareroot	TRUE
RESULTS_SEARCH_8_PARAMETERS_MSMS_AUTO_CALIBRATION_OUT_avres	-3.60734e-08
RESULTS_SEARCH_8_PARAMETERS_MSMS_AUTO_CALIBRATION_OUT_c0	-2.93871e-07
RESULTS_SEARCH_8_PARAMETERS_MSMS_AUTO_CALIBRATION_OUT_c1minus1	3.97945e-07
RESULTS_SEARCH_8_PARAMETERS_MSMS_AUTO_CALIBRATION_OUT_c2	0
RESULTS_SEARCH_8_PARAMETERS_MSMS_AUTO_CALIBRATION_OUT_file	2
RESULTS_SEARCH_8_PARAMETERS_MSMS_AUTO_CALIBRATION_OUT_partnumber	4
RESULTS_SEARCH_8_PARAMETERS_MSMS_AUTO_CALIBRATION_OUT_polyorder	1
RESULTS_SEARCH_8_PARAMETERS_MSMS_AUTO_CALIBRATION_OUT_sample	1
RESULTS_SEARCH_8_PARAMETERS_MSMS_AUTO_CALIBRATION_OUT_squareroot	TRUE
RESULTS_SEARCH_8_PARAMETERS_MAX_PRECURSORS_FRAGLET	5
RESULTS_SEARCH_8_PARAMETERS_MAX_PRECURSORS_TAGLET	1
RESULTS_SEARCH_8_PARAMETERS_PRECURSORS_DR_FRAGLET	10
RESULTS_SEARCH_8_PARAMETERS_PRECURSORS_DR_TAGLET	3
RESULTS_SEARCH_8_PARAMETERS_DEFAULT_CHARGE_STATE_1_charge	2
RESULTS_SEARCH_8_PARAMETERS_DEFAULT_CHARGE_STATE_1_probability	1
RESULTS_SEARCH_8_PARAMETERS_DEFAULT_CHARGE_STATE_2_charge	1900-01-03
RESULTS_SEARCH_8_PARAMETERS_DEFAULT_CHARGE_STATE_2_probability	1900-01-01
RESULTS_SEARCH_8_PARAMETERS_DEFAULT_CHARGE_STATE_3_charge	4
RESULTS_SEARCH_8_PARAMETERS_DEFAULT_CHARGE_STATE_3_probability	1
RESULTS_SEARCH_8_PARAMETERS_VERSION	5.0.1.0, 4895
RESULTS_SEARCH_8_PARAMETERS_PARAGON_VERSION	5.0.1.0, 4874
RESULTS_SEARCH_8_PARAMETERS_APPLICATION	ProteinPilot(tm) Software
RESULTS_SEARCH_8_PARAMETERS_PROGROUP_alternativedispositionmaximumfoldprobabilitydrop	100
RESULTS_SEARCH_8_PARAMETERS_PROGROUP_alternativedispositionmaximumfoldscoredrop	2
RESULTS_SEARCH_8_PARAMETERS_PROGROUP_autodiscordantpeptidethreshold	0.3
RESULTS_SEARCH_8_PARAMETERS_PROGROUP_bayesconfidencecalclulation	TRUE
RESULTS_SEARCH_8_PARAMETERS_PROGROUP_calibrateconfidence	TRUE
RESULTS_SEARCH_8_PARAMETERS_PROGROUP_compresspeptides	FALSE
RESULTS_SEARCH_8_PARAMETERS_PROGROUP_confidencepercentthresholdforexcludingothersfromquant	15
RESULTS_SEARCH_8_PARAMETERS_PROGROUP_confidencepercentthresholdforincludingselfinquant	15
RESULTS_SEARCH_8_PARAMETERS_PROGROUP_donotstoremspeaklists	FALSE
RESULTS_SEARCH_8_PARAMETERS_PROGROUP_fasta	C:\AB SCIEX\ProteinPilot Data\SearchDatabases\uniprot-zebrafish_with_Clover.fasta
RESULTS_SEARCH_8_PARAMETERS_PROGROUP_featuregroupminpepconf	0.66
RESULTS_SEARCH_8_PARAMETERS_PROGROUP_featuregroupminups	0.47
RESULTS_SEARCH_8_PARAMETERS_PROGROUP_focusingintersection	4
RESULTS_SEARCH_8_PARAMETERS_PROGROUP_focusingminimummatchconfidence	0.1
RESULTS_SEARCH_8_PARAMETERS_PROGROUP_focusingminunusedprotscore	0.1
RESULTS_SEARCH_8_PARAMETERS_PROGROUP_focusingsubsetcutoff	6
RESULTS_SEARCH_8_PARAMETERS_PROGROUP_intersection	1.3
RESULTS_SEARCH_8_PARAMETERS_PROGROUP_minimummatchconfidencecutoff	0.001
RESULTS_SEARCH_8_PARAMETERS_PROGROUP_minunusedprotscore	0.0458
RESULTS_SEARCH_8_PARAMETERS_PROGROUP_subsetcutoff	2
RESULTS_SEARCH_8_PARAMETERS_PROGROUP_unusedprotscorethresholdforexcludingothersfromquant	1.3
RESULTS_SEARCH_8_PARAMETERS_PEAKLIST_count	3355
RESULTS_SEARCH_8_PARAMETERS_PEAKLIST_filenumber	2
RESULTS_SEARCH_8_PARAMETERS_PEAKLIST_original_count	3355
RESULTS_SEARCH_8_PARAMETERS_PEAKLIST_originalfilename	C:\AB SCIEX\ProteinPilot Data\Results\Albert\ZX 20200429 6600\ZX 20200429 6600 C 2.wiff
RESULTS_SEARCH_8_PARAMETERS_PEAKLIST_partnumber	4
RESULTS_SEARCH_8_PARAMETERS_QUANT_TYPE_background_correction	FALSE
RESULTS_SEARCH_8_PARAMETERS_QUANT_TYPE_bias_correction	TRUE
RESULTS_SEARCH_8_PARAMETERS_QUANT_TYPE_keep_extreme_peptides_over_fraction	0
RESULTS_SEARCH_8_PARAMETERS_QUANT_TYPE_low_confidence_check	TRUE
RESULTS_SEARCH_8_PARAMETERS_QUANT_TYPE_low_intensity_check	TRUE
RESULTS_SEARCH_8_PARAMETERS_QUANT_TYPE_median_statistic	TRUE
RESULTS_SEARCH_8_PARAMETERS_QUANT_TYPE_mod_check	TRUE
RESULTS_SEARCH_8_PARAMETERS_QUANT_TYPE_quant_threshold	-1
RESULTS_SEARCH_8_PARAMETERS_QUANT_TYPE_quant_threshold_sn	9
RESULTS_SEARCH_8_PARAMETERS_QUANT_TYPE_separate_searches	FALSE
RESULTS_SEARCH_8_PARAMETERS_QUANT_TYPE_shared_msms_check	TRUE
RESULTS_SEARCH_8_PARAMETERS_PARAGON_METHOD_SETTINGS_UI_SAMPLE_TYPE	Identification
RESULTS_SEARCH_8_PARAMETERS_PARAGON_METHOD_SETTINGS_UI_CYS_ALKYLATION	Iodoacetamide w other Cys mods possible
RESULTS_SEARCH_8_PARAMETERS_PARAGON_METHOD_SETTINGS_UI_DIGESTION	Trypsin + Lys C
RESULTS_SEARCH_8_PARAMETERS_PARAGON_METHOD_SETTINGS_UI_SPECIAL_FACTOR	Gel-based ID
RESULTS_SEARCH_8_PARAMETERS_PARAGON_METHOD_SETTINGS_UI_INSTRUMENT	TripleTOF 6600
RESULTS_SEARCH_8_PARAMETERS_PARAGON_METHOD_SETTINGS_UI_SEARCH_EFFORT	Thorough
RESULTS_SEARCH_8_PARAMETERS_PARAGON_METHOD_SETTINGS_UI_USER_NAME	IMB-MASS02\massuser
RESULTS_SEARCH_8_PARAMETERS_PARAGON_METHOD_SETTINGS_UI_MACHINE_NAME	IMB-MASS02
RESULTS_SEARCH_8_PARAMETERS_PARAGON_METHOD_SETTINGS_UI_SEARCH_ID	6.37467e+17
RESULTS_SEARCH_8_PARAMETERS_PARAGON_METHOD_SETTINGS_UI_START_TIME	2021-01-19 16:07:13
RESULTS_SEARCH_8_PARAMETERS_PARAGON_METHOD_SETTINGS_UI_MIN_UNUSED_PROTSCORE	0.0458
RESULTS_SEARCH_8_PARAMETERS_PARAGON_METHOD_SETTINGS_UI_PSPEP	TRUE
RESULTS_SEARCH_9_time_cpu	177825
RESULTS_SEARCH_9_time_duration	212807
RESULTS_SEARCH_9_version	5.0.1.4874
RESULTS_SEARCH_9_xml:id	SEARCH:1:637466692301440684_4
RESULTS_SEARCH_9_PARAMETERS_chemical_data_edited	FALSE
RESULTS_SEARCH_9_PARAMETERS_do_multiprecursor_search	TRUE
RESULTS_SEARCH_9_PARAMETERS_do_reverse_search	TRUE
RESULTS_SEARCH_9_PARAMETERS_max_quant_labels	35
RESULTS_SEARCH_9_PARAMETERS_maxresults	15
RESULTS_SEARCH_9_PARAMETERS_separate_searches	FALSE
RESULTS_SEARCH_9_PARAMETERS_MSTOLERANCE_type	dalton
RESULTS_SEARCH_9_PARAMETERS_MSTOLERANCE_value	0.05
RESULTS_SEARCH_9_PARAMETERS_MSMSTOLERANCE_type	dalton
RESULTS_SEARCH_9_PARAMETERS_MSMSTOLERANCE_value	0.1
RESULTS_SEARCH_9_PARAMETERS_MS_STANDARD_DEVIATION_type	dalton
RESULTS_SEARCH_9_PARAMETERS_MS_STANDARD_DEVIATION_value	0.0011
RESULTS_SEARCH_9_PARAMETERS_MSMS_STANDARD_DEVIATION_type	dalton
RESULTS_SEARCH_9_PARAMETERS_MSMS_STANDARD_DEVIATION_value	0.01
RESULTS_SEARCH_9_PARAMETERS_FASTA_filename	C:\AB SCIEX\ProteinPilot Data\SearchDatabases\uniprot-zebrafish_with_Clover.fasta
RESULTS_SEARCH_9_PARAMETERS_AUTO_CALIBRATION_ms	TRUE
RESULTS_SEARCH_9_PARAMETERS_AUTO_CALIBRATION_msexport	FALSE
RESULTS_SEARCH_9_PARAMETERS_AUTO_CALIBRATION_msms	TRUE
RESULTS_SEARCH_9_PARAMETERS_AUTO_CALIBRATION_msmstolsdratio	2.75
RESULTS_SEARCH_9_PARAMETERS_AUTO_CALIBRATION_mstolsdratio	7
RESULTS_SEARCH_9_PARAMETERS_AUTO_CALIBRATION_squareroot	TRUE
RESULTS_SEARCH_9_PARAMETERS_AUTO_CALIBRATION_type	dalton
RESULTS_SEARCH_9_PARAMETERS_AUTO_CALIBRATION_MCP_d_s_s_f	0.0666667
RESULTS_SEARCH_9_PARAMETERS_AUTO_CALIBRATION_MCP_d_s_w_f	3
RESULTS_SEARCH_9_PARAMETERS_AUTO_CALIBRATION_MCP_m_f_r_mbc	200
RESULTS_SEARCH_9_PARAMETERS_AUTO_CALIBRATION_MCP_m_m_c	10
RESULTS_SEARCH_9_PARAMETERS_AUTO_CALIBRATION_MCP_m_m_f_s	0.25
RESULTS_SEARCH_9_PARAMETERS_AUTO_CALIBRATION_MCP_m_m_p_f	0.33
RESULTS_SEARCH_9_PARAMETERS_AUTO_CALIBRATION_MCP_m_m_p_rms_f	1
RESULTS_SEARCH_9_PARAMETERS_AUTO_CALIBRATION_MCP_m_p_t_f	1
RESULTS_SEARCH_9_PARAMETERS_AUTO_CALIBRATION_MCP_m_r_h_n_b	15
RESULTS_SEARCH_9_PARAMETERS_AUTO_CALIBRATION_MCP_m_z_n_s	99
RESULTS_SEARCH_9_PARAMETERS_AUTO_CALIBRATION_MCP_m_z_s_mn_f_r	0.0666667
RESULTS_SEARCH_9_PARAMETERS_AUTO_CALIBRATION_MCP_m_z_s_mx_f_r	0.1
RESULTS_SEARCH_9_PARAMETERS_MS_AUTO_CALIBRATION_OUT_avres	-1.5745e-10
RESULTS_SEARCH_9_PARAMETERS_MS_AUTO_CALIBRATION_OUT_c0	-1.29143e-05
RESULTS_SEARCH_9_PARAMETERS_MS_AUTO_CALIBRATION_OUT_c1minus1	2.70978e-06
RESULTS_SEARCH_9_PARAMETERS_MS_AUTO_CALIBRATION_OUT_c2	0
RESULTS_SEARCH_9_PARAMETERS_MS_AUTO_CALIBRATION_OUT_file	2
RESULTS_SEARCH_9_PARAMETERS_MS_AUTO_CALIBRATION_OUT_partnumber	5
RESULTS_SEARCH_9_PARAMETERS_MS_AUTO_CALIBRATION_OUT_polyorder	1
RESULTS_SEARCH_9_PARAMETERS_MS_AUTO_CALIBRATION_OUT_sample	1
RESULTS_SEARCH_9_PARAMETERS_MS_AUTO_CALIBRATION_OUT_squareroot	TRUE
RESULTS_SEARCH_9_PARAMETERS_MSMS_AUTO_CALIBRATION_OUT_avres	-5.02423e-08
RESULTS_SEARCH_9_PARAMETERS_MSMS_AUTO_CALIBRATION_OUT_c0	-6.22275e-06
RESULTS_SEARCH_9_PARAMETERS_MSMS_AUTO_CALIBRATION_OUT_c1minus1	9.3009e-07
RESULTS_SEARCH_9_PARAMETERS_MSMS_AUTO_CALIBRATION_OUT_c2	0
RESULTS_SEARCH_9_PARAMETERS_MSMS_AUTO_CALIBRATION_OUT_file	2
RESULTS_SEARCH_9_PARAMETERS_MSMS_AUTO_CALIBRATION_OUT_partnumber	5
RESULTS_SEARCH_9_PARAMETERS_MSMS_AUTO_CALIBRATION_OUT_polyorder	1
RESULTS_SEARCH_9_PARAMETERS_MSMS_AUTO_CALIBRATION_OUT_sample	1
RESULTS_SEARCH_9_PARAMETERS_MSMS_AUTO_CALIBRATION_OUT_squareroot	TRUE
RESULTS_SEARCH_9_PARAMETERS_MAX_PRECURSORS_FRAGLET	5
RESULTS_SEARCH_9_PARAMETERS_MAX_PRECURSORS_TAGLET	1
RESULTS_SEARCH_9_PARAMETERS_PRECURSORS_DR_FRAGLET	10
RESULTS_SEARCH_9_PARAMETERS_PRECURSORS_DR_TAGLET	3
RESULTS_SEARCH_9_PARAMETERS_DEFAULT_CHARGE_STATE_1_charge	2
RESULTS_SEARCH_9_PARAMETERS_DEFAULT_CHARGE_STATE_1_probability	1
RESULTS_SEARCH_9_PARAMETERS_DEFAULT_CHARGE_STATE_2_charge	3
RESULTS_SEARCH_9_PARAMETERS_DEFAULT_CHARGE_STATE_2_probability	1
RESULTS_SEARCH_9_PARAMETERS_DEFAULT_CHARGE_STATE_3_charge	4
RESULTS_SEARCH_9_PARAMETERS_DEFAULT_CHARGE_STATE_3_probability	1
RESULTS_SEARCH_9_PARAMETERS_VERSION	5.0.1.0, 4895
RESULTS_SEARCH_9_PARAMETERS_PARAGON_VERSION	5.0.1.0, 4874
RESULTS_SEARCH_9_PARAMETERS_APPLICATION	ProteinPilot(tm) Software
RESULTS_SEARCH_9_PARAMETERS_PROGROUP_alternativedispositionmaximumfoldprobabilitydrop	100
RESULTS_SEARCH_9_PARAMETERS_PROGROUP_alternativedispositionmaximumfoldscoredrop	2
RESULTS_SEARCH_9_PARAMETERS_PROGROUP_autodiscordantpeptidethreshold	0.3
RESULTS_SEARCH_9_PARAMETERS_PROGROUP_bayesconfidencecalclulation	TRUE
RESULTS_SEARCH_9_PARAMETERS_PROGROUP_calibrateconfidence	TRUE
RESULTS_SEARCH_9_PARAMETERS_PROGROUP_compresspeptides	FALSE
RESULTS_SEARCH_9_PARAMETERS_PROGROUP_confidencepercentthresholdforexcludingothersfromquant	15
RESULTS_SEARCH_9_PARAMETERS_PROGROUP_confidencepercentthresholdforincludingselfinquant	15
RESULTS_SEARCH_9_PARAMETERS_PROGROUP_donotstoremspeaklists	FALSE
RESULTS_SEARCH_9_PARAMETERS_PROGROUP_fasta	C:\AB SCIEX\ProteinPilot Data\SearchDatabases\uniprot-zebrafish_with_Clover.fasta
RESULTS_SEARCH_9_PARAMETERS_PROGROUP_featuregroupminpepconf	0.66
RESULTS_SEARCH_9_PARAMETERS_PROGROUP_featuregroupminups	0.47
RESULTS_SEARCH_9_PARAMETERS_PROGROUP_focusingintersection	4
RESULTS_SEARCH_9_PARAMETERS_PROGROUP_focusingminimummatchconfidence	0.1
RESULTS_SEARCH_9_PARAMETERS_PROGROUP_focusingminunusedprotscore	02:24:00
RESULTS_SEARCH_9_PARAMETERS_PROGROUP_focusingsubsetcutoff	6
RESULTS_SEARCH_9_PARAMETERS_PROGROUP_intersection	1.3
RESULTS_SEARCH_9_PARAMETERS_PROGROUP_minimummatchconfidencecutoff	0.001
RESULTS_SEARCH_9_PARAMETERS_PROGROUP_minunusedprotscore	0.0458
RESULTS_SEARCH_9_PARAMETERS_PROGROUP_subsetcutoff	2
RESULTS_SEARCH_9_PARAMETERS_PROGROUP_unusedprotscorethresholdforexcludingothersfromquant	1.3
RESULTS_SEARCH_9_PARAMETERS_PEAKLIST_count	3331
RESULTS_SEARCH_9_PARAMETERS_PEAKLIST_filenumber	2
RESULTS_SEARCH_9_PARAMETERS_PEAKLIST_original_count	3331
RESULTS_SEARCH_9_PARAMETERS_PEAKLIST_originalfilename	C:\AB SCIEX\ProteinPilot Data\Results\Albert\ZX 20200429 6600\ZX 20200429 6600 C 2.wiff
RESULTS_SEARCH_9_PARAMETERS_PEAKLIST_partnumber	5
RESULTS_SEARCH_9_PARAMETERS_QUANT_TYPE_background_correction	FALSE
RESULTS_SEARCH_9_PARAMETERS_QUANT_TYPE_bias_correction	TRUE
RESULTS_SEARCH_9_PARAMETERS_QUANT_TYPE_keep_extreme_peptides_over_fraction	0
RESULTS_SEARCH_9_PARAMETERS_QUANT_TYPE_low_confidence_check	TRUE
RESULTS_SEARCH_9_PARAMETERS_QUANT_TYPE_low_intensity_check	TRUE
RESULTS_SEARCH_9_PARAMETERS_QUANT_TYPE_median_statistic	TRUE
RESULTS_SEARCH_9_PARAMETERS_QUANT_TYPE_mod_check	TRUE
RESULTS_SEARCH_9_PARAMETERS_QUANT_TYPE_quant_threshold	-1
RESULTS_SEARCH_9_PARAMETERS_QUANT_TYPE_quant_threshold_sn	9
RESULTS_SEARCH_9_PARAMETERS_QUANT_TYPE_separate_searches	FALSE
RESULTS_SEARCH_9_PARAMETERS_QUANT_TYPE_shared_msms_check	TRUE
RESULTS_SEARCH_9_PARAMETERS_PARAGON_METHOD_SETTINGS_UI_SAMPLE_TYPE	Identification
RESULTS_SEARCH_9_PARAMETERS_PARAGON_METHOD_SETTINGS_UI_CYS_ALKYLATION	Iodoacetamide w other Cys mods possible
RESULTS_SEARCH_9_PARAMETERS_PARAGON_METHOD_SETTINGS_UI_DIGESTION	Trypsin + Lys C
RESULTS_SEARCH_9_PARAMETERS_PARAGON_METHOD_SETTINGS_UI_SPECIAL_FACTOR	Gel-based ID
RESULTS_SEARCH_9_PARAMETERS_PARAGON_METHOD_SETTINGS_UI_INSTRUMENT	TripleTOF 6600
RESULTS_SEARCH_9_PARAMETERS_PARAGON_METHOD_SETTINGS_UI_SEARCH_EFFORT	Thorough
RESULTS_SEARCH_9_PARAMETERS_PARAGON_METHOD_SETTINGS_UI_USER_NAME	IMB-MASS02\massuser
RESULTS_SEARCH_9_PARAMETERS_PARAGON_METHOD_SETTINGS_UI_MACHINE_NAME	IMB-MASS02
RESULTS_SEARCH_9_PARAMETERS_PARAGON_METHOD_SETTINGS_UI_SEARCH_ID	6.37467e+17
RESULTS_SEARCH_9_PARAMETERS_PARAGON_METHOD_SETTINGS_UI_START_TIME	2021-01-19 16:07:13
RESULTS_SEARCH_9_PARAMETERS_PARAGON_METHOD_SETTINGS_UI_MIN_UNUSED_PROTSCORE	0.0458
RESULTS_SEARCH_9_PARAMETERS_PARAGON_METHOD_SETTINGS_UI_PSPEP	TRUE
RESULTS_SEARCH_10_time_cpu	199728
RESULTS_SEARCH_10_time_duration	240015
RESULTS_SEARCH_10_version	5.0.1.4874
RESULTS_SEARCH_10_xml:id	SEARCH:2:637466692301440684_4
RESULTS_SEARCH_10_PARAMETERS_chemical_data_edited	FALSE
RESULTS_SEARCH_10_PARAMETERS_do_multiprecursor_search	TRUE
RESULTS_SEARCH_10_PARAMETERS_do_reverse_search	TRUE
RESULTS_SEARCH_10_PARAMETERS_max_quant_labels	35
RESULTS_SEARCH_10_PARAMETERS_maxresults	15
RESULTS_SEARCH_10_PARAMETERS_separate_searches	FALSE
RESULTS_SEARCH_10_PARAMETERS_MSTOLERANCE_type	dalton
RESULTS_SEARCH_10_PARAMETERS_MSTOLERANCE_value	0.05
RESULTS_SEARCH_10_PARAMETERS_MSMSTOLERANCE_type	dalton
RESULTS_SEARCH_10_PARAMETERS_MSMSTOLERANCE_value	0.1
RESULTS_SEARCH_10_PARAMETERS_MS_STANDARD_DEVIATION_type	dalton
RESULTS_SEARCH_10_PARAMETERS_MS_STANDARD_DEVIATION_value	0.0011
RESULTS_SEARCH_10_PARAMETERS_MSMS_STANDARD_DEVIATION_type	dalton
RESULTS_SEARCH_10_PARAMETERS_MSMS_STANDARD_DEVIATION_value	0.01
RESULTS_SEARCH_10_PARAMETERS_FASTA_filename	C:\AB SCIEX\ProteinPilot Data\SearchDatabases\uniprot-zebrafish_with_Clover.fasta
RESULTS_SEARCH_10_PARAMETERS_AUTO_CALIBRATION_ms	TRUE
RESULTS_SEARCH_10_PARAMETERS_AUTO_CALIBRATION_msexport	FALSE
RESULTS_SEARCH_10_PARAMETERS_AUTO_CALIBRATION_msms	TRUE
RESULTS_SEARCH_10_PARAMETERS_AUTO_CALIBRATION_msmstolsdratio	2.75
RESULTS_SEARCH_10_PARAMETERS_AUTO_CALIBRATION_mstolsdratio	7
RESULTS_SEARCH_10_PARAMETERS_AUTO_CALIBRATION_squareroot	TRUE
RESULTS_SEARCH_10_PARAMETERS_AUTO_CALIBRATION_type	dalton
RESULTS_SEARCH_10_PARAMETERS_AUTO_CALIBRATION_MCP_d_s_s_f	0.0666667
RESULTS_SEARCH_10_PARAMETERS_AUTO_CALIBRATION_MCP_d_s_w_f	3
RESULTS_SEARCH_10_PARAMETERS_AUTO_CALIBRATION_MCP_m_f_r_mbc	200
RESULTS_SEARCH_10_PARAMETERS_AUTO_CALIBRATION_MCP_m_m_c	10
RESULTS_SEARCH_10_PARAMETERS_AUTO_CALIBRATION_MCP_m_m_f_s	0.25
RESULTS_SEARCH_10_PARAMETERS_AUTO_CALIBRATION_MCP_m_m_p_f	0.33
RESULTS_SEARCH_10_PARAMETERS_AUTO_CALIBRATION_MCP_m_m_p_rms_f	1
RESULTS_SEARCH_10_PARAMETERS_AUTO_CALIBRATION_MCP_m_p_t_f	1
RESULTS_SEARCH_10_PARAMETERS_AUTO_CALIBRATION_MCP_m_r_h_n_b	15
RESULTS_SEARCH_10_PARAMETERS_AUTO_CALIBRATION_MCP_m_z_n_s	99
RESULTS_SEARCH_10_PARAMETERS_AUTO_CALIBRATION_MCP_m_z_s_mn_f_r	0.0666667
RESULTS_SEARCH_10_PARAMETERS_AUTO_CALIBRATION_MCP_m_z_s_mx_f_r	0.1
RESULTS_SEARCH_10_PARAMETERS_MS_AUTO_CALIBRATION_OUT_avres	-1.5745e-10
RESULTS_SEARCH_10_PARAMETERS_MS_AUTO_CALIBRATION_OUT_c0	-1.29143e-05
RESULTS_SEARCH_10_PARAMETERS_MS_AUTO_CALIBRATION_OUT_c1minus1	2.70978e-06
RESULTS_SEARCH_10_PARAMETERS_MS_AUTO_CALIBRATION_OUT_c2	0
RESULTS_SEARCH_10_PARAMETERS_MS_AUTO_CALIBRATION_OUT_file	2
RESULTS_SEARCH_10_PARAMETERS_MS_AUTO_CALIBRATION_OUT_partnumber	5
RESULTS_SEARCH_10_PARAMETERS_MS_AUTO_CALIBRATION_OUT_polyorder	1
RESULTS_SEARCH_10_PARAMETERS_MS_AUTO_CALIBRATION_OUT_sample	1
RESULTS_SEARCH_10_PARAMETERS_MS_AUTO_CALIBRATION_OUT_squareroot	TRUE
RESULTS_SEARCH_10_PARAMETERS_MSMS_AUTO_CALIBRATION_OUT_avres	-5.02423e-08
RESULTS_SEARCH_10_PARAMETERS_MSMS_AUTO_CALIBRATION_OUT_c0	-6.22275e-06
RESULTS_SEARCH_10_PARAMETERS_MSMS_AUTO_CALIBRATION_OUT_c1minus1	9.3009e-07
RESULTS_SEARCH_10_PARAMETERS_MSMS_AUTO_CALIBRATION_OUT_c2	0
RESULTS_SEARCH_10_PARAMETERS_MSMS_AUTO_CALIBRATION_OUT_file	2
RESULTS_SEARCH_10_PARAMETERS_MSMS_AUTO_CALIBRATION_OUT_partnumber	5
RESULTS_SEARCH_10_PARAMETERS_MSMS_AUTO_CALIBRATION_OUT_polyorder	1
RESULTS_SEARCH_10_PARAMETERS_MSMS_AUTO_CALIBRATION_OUT_sample	1
RESULTS_SEARCH_10_PARAMETERS_MSMS_AUTO_CALIBRATION_OUT_squareroot	TRUE
RESULTS_SEARCH_10_PARAMETERS_MAX_PRECURSORS_FRAGLET	5
RESULTS_SEARCH_10_PARAMETERS_MAX_PRECURSORS_TAGLET	1
RESULTS_SEARCH_10_PARAMETERS_PRECURSORS_DR_FRAGLET	10
RESULTS_SEARCH_10_PARAMETERS_PRECURSORS_DR_TAGLET	3
RESULTS_SEARCH_10_PARAMETERS_DEFAULT_CHARGE_STATE_1_charge	2
RESULTS_SEARCH_10_PARAMETERS_DEFAULT_CHARGE_STATE_1_probability	1
RESULTS_SEARCH_10_PARAMETERS_DEFAULT_CHARGE_STATE_2_charge	3
RESULTS_SEARCH_10_PARAMETERS_DEFAULT_CHARGE_STATE_2_probability	1
RESULTS_SEARCH_10_PARAMETERS_DEFAULT_CHARGE_STATE_3_charge	4
RESULTS_SEARCH_10_PARAMETERS_DEFAULT_CHARGE_STATE_3_probability	1
RESULTS_SEARCH_10_PARAMETERS_VERSION	5.0.1.0, 4895
RESULTS_SEARCH_10_PARAMETERS_PARAGON_VERSION	5.0.1.0, 4874
RESULTS_SEARCH_10_PARAMETERS_APPLICATION	ProteinPilot(tm) Software
RESULTS_SEARCH_10_PARAMETERS_PROGROUP_alternativedispositionmaximumfoldprobabilitydrop	100
RESULTS_SEARCH_10_PARAMETERS_PROGROUP_alternativedispositionmaximumfoldscoredrop	2
RESULTS_SEARCH_10_PARAMETERS_PROGROUP_autodiscordantpeptidethreshold	0.3
RESULTS_SEARCH_10_PARAMETERS_PROGROUP_bayesconfidencecalclulation	TRUE
RESULTS_SEARCH_10_PARAMETERS_PROGROUP_calibrateconfidence	TRUE
RESULTS_SEARCH_10_PARAMETERS_PROGROUP_compresspeptides	FALSE
RESULTS_SEARCH_10_PARAMETERS_PROGROUP_confidencepercentthresholdforexcludingothersfromquant	15
RESULTS_SEARCH_10_PARAMETERS_PROGROUP_confidencepercentthresholdforincludingselfinquant	15
RESULTS_SEARCH_10_PARAMETERS_PROGROUP_donotstoremspeaklists	FALSE
RESULTS_SEARCH_10_PARAMETERS_PROGROUP_fasta	C:\AB SCIEX\ProteinPilot Data\SearchDatabases\uniprot-zebrafish_with_Clover.fasta
RESULTS_SEARCH_10_PARAMETERS_PROGROUP_featuregroupminpepconf	0.66
RESULTS_SEARCH_10_PARAMETERS_PROGROUP_featuregroupminups	0.47
RESULTS_SEARCH_10_PARAMETERS_PROGROUP_focusingintersection	4
RESULTS_SEARCH_10_PARAMETERS_PROGROUP_focusingminimummatchconfidence	0.1
RESULTS_SEARCH_10_PARAMETERS_PROGROUP_focusingminunusedprotscore	02:24:00
RESULTS_SEARCH_10_PARAMETERS_PROGROUP_focusingsubsetcutoff	6
RESULTS_SEARCH_10_PARAMETERS_PROGROUP_intersection	1.3
RESULTS_SEARCH_10_PARAMETERS_PROGROUP_minimummatchconfidencecutoff	0.001
RESULTS_SEARCH_10_PARAMETERS_PROGROUP_minunusedprotscore	0.0458
RESULTS_SEARCH_10_PARAMETERS_PROGROUP_subsetcutoff	2
RESULTS_SEARCH_10_PARAMETERS_PROGROUP_unusedprotscorethresholdforexcludingothersfromquant	1.3
RESULTS_SEARCH_10_PARAMETERS_PEAKLIST_count	3331
RESULTS_SEARCH_10_PARAMETERS_PEAKLIST_filenumber	2
RESULTS_SEARCH_10_PARAMETERS_PEAKLIST_original_count	3331
RESULTS_SEARCH_10_PARAMETERS_PEAKLIST_originalfilename	C:\AB SCIEX\ProteinPilot Data\Results\Albert\ZX 20200429 6600\ZX 20200429 6600 C 2.wiff
RESULTS_SEARCH_10_PARAMETERS_PEAKLIST_partnumber	5
RESULTS_SEARCH_10_PARAMETERS_QUANT_TYPE_background_correction	FALSE
RESULTS_SEARCH_10_PARAMETERS_QUANT_TYPE_bias_correction	TRUE
RESULTS_SEARCH_10_PARAMETERS_QUANT_TYPE_keep_extreme_peptides_over_fraction	0
RESULTS_SEARCH_10_PARAMETERS_QUANT_TYPE_low_confidence_check	TRUE
RESULTS_SEARCH_10_PARAMETERS_QUANT_TYPE_low_intensity_check	TRUE
RESULTS_SEARCH_10_PARAMETERS_QUANT_TYPE_median_statistic	TRUE
RESULTS_SEARCH_10_PARAMETERS_QUANT_TYPE_mod_check	TRUE
RESULTS_SEARCH_10_PARAMETERS_QUANT_TYPE_quant_threshold	-1
RESULTS_SEARCH_10_PARAMETERS_QUANT_TYPE_quant_threshold_sn	9
RESULTS_SEARCH_10_PARAMETERS_QUANT_TYPE_separate_searches	FALSE
RESULTS_SEARCH_10_PARAMETERS_QUANT_TYPE_shared_msms_check	TRUE
RESULTS_SEARCH_10_PARAMETERS_PARAGON_METHOD_SETTINGS_UI_SAMPLE_TYPE	Identification
RESULTS_SEARCH_10_PARAMETERS_PARAGON_METHOD_SETTINGS_UI_CYS_ALKYLATION	Iodoacetamide w other Cys mods possible
RESULTS_SEARCH_10_PARAMETERS_PARAGON_METHOD_SETTINGS_UI_DIGESTION	Trypsin + Lys C
RESULTS_SEARCH_10_PARAMETERS_PARAGON_METHOD_SETTINGS_UI_SPECIAL_FACTOR	Gel-based ID
RESULTS_SEARCH_10_PARAMETERS_PARAGON_METHOD_SETTINGS_UI_INSTRUMENT	TripleTOF 6600
RESULTS_SEARCH_10_PARAMETERS_PARAGON_METHOD_SETTINGS_UI_SEARCH_EFFORT	Thorough
RESULTS_SEARCH_10_PARAMETERS_PARAGON_METHOD_SETTINGS_UI_USER_NAME	IMB-MASS02\massuser
RESULTS_SEARCH_10_PARAMETERS_PARAGON_METHOD_SETTINGS_UI_MACHINE_NAME	IMB-MASS02
RESULTS_SEARCH_10_PARAMETERS_PARAGON_METHOD_SETTINGS_UI_SEARCH_ID	6.37467e+17
RESULTS_SEARCH_10_PARAMETERS_PARAGON_METHOD_SETTINGS_UI_START_TIME	2021-01-19 16:07:13
RESULTS_SEARCH_10_PARAMETERS_PARAGON_METHOD_SETTINGS_UI_MIN_UNUSED_PROTSCORE	0.0458
RESULTS_SEARCH_10_PARAMETERS_PARAGON_METHOD_SETTINGS_UI_PSPEP	TRUE
RESULTS_SEARCH_11_time_cpu	214392
RESULTS_SEARCH_11_time_duration	249391
RESULTS_SEARCH_11_version	5.0.1.4874
RESULTS_SEARCH_11_xml:id	SEARCH:1:637466692301440684_5
RESULTS_SEARCH_11_PARAMETERS_chemical_data_edited	FALSE
RESULTS_SEARCH_11_PARAMETERS_do_multiprecursor_search	TRUE
RESULTS_SEARCH_11_PARAMETERS_do_reverse_search	TRUE
RESULTS_SEARCH_11_PARAMETERS_max_quant_labels	35
RESULTS_SEARCH_11_PARAMETERS_maxresults	15
RESULTS_SEARCH_11_PARAMETERS_separate_searches	FALSE
RESULTS_SEARCH_11_PARAMETERS_MSTOLERANCE_type	dalton
RESULTS_SEARCH_11_PARAMETERS_MSTOLERANCE_value	0.05
RESULTS_SEARCH_11_PARAMETERS_MSMSTOLERANCE_type	dalton
RESULTS_SEARCH_11_PARAMETERS_MSMSTOLERANCE_value	0.1
RESULTS_SEARCH_11_PARAMETERS_MS_STANDARD_DEVIATION_type	dalton
RESULTS_SEARCH_11_PARAMETERS_MS_STANDARD_DEVIATION_value	0.0011
RESULTS_SEARCH_11_PARAMETERS_MSMS_STANDARD_DEVIATION_type	dalton
RESULTS_SEARCH_11_PARAMETERS_MSMS_STANDARD_DEVIATION_value	0.01
RESULTS_SEARCH_11_PARAMETERS_FASTA_filename	C:\AB SCIEX\ProteinPilot Data\SearchDatabases\uniprot-zebrafish_with_Clover.fasta
RESULTS_SEARCH_11_PARAMETERS_AUTO_CALIBRATION_ms	TRUE
RESULTS_SEARCH_11_PARAMETERS_AUTO_CALIBRATION_msexport	FALSE
RESULTS_SEARCH_11_PARAMETERS_AUTO_CALIBRATION_msms	TRUE
RESULTS_SEARCH_11_PARAMETERS_AUTO_CALIBRATION_msmstolsdratio	2.75
RESULTS_SEARCH_11_PARAMETERS_AUTO_CALIBRATION_mstolsdratio	7
RESULTS_SEARCH_11_PARAMETERS_AUTO_CALIBRATION_squareroot	TRUE
RESULTS_SEARCH_11_PARAMETERS_AUTO_CALIBRATION_type	dalton
RESULTS_SEARCH_11_PARAMETERS_AUTO_CALIBRATION_MCP_d_s_s_f	0.0666667
RESULTS_SEARCH_11_PARAMETERS_AUTO_CALIBRATION_MCP_d_s_w_f	3
RESULTS_SEARCH_11_PARAMETERS_AUTO_CALIBRATION_MCP_m_f_r_mbc	200
RESULTS_SEARCH_11_PARAMETERS_AUTO_CALIBRATION_MCP_m_m_c	10
RESULTS_SEARCH_11_PARAMETERS_AUTO_CALIBRATION_MCP_m_m_f_s	0.25
RESULTS_SEARCH_11_PARAMETERS_AUTO_CALIBRATION_MCP_m_m_p_f	0.33
RESULTS_SEARCH_11_PARAMETERS_AUTO_CALIBRATION_MCP_m_m_p_rms_f	1
RESULTS_SEARCH_11_PARAMETERS_AUTO_CALIBRATION_MCP_m_p_t_f	1
RESULTS_SEARCH_11_PARAMETERS_AUTO_CALIBRATION_MCP_m_r_h_n_b	15
RESULTS_SEARCH_11_PARAMETERS_AUTO_CALIBRATION_MCP_m_z_n_s	99
RESULTS_SEARCH_11_PARAMETERS_AUTO_CALIBRATION_MCP_m_z_s_mn_f_r	0.0666667
RESULTS_SEARCH_11_PARAMETERS_AUTO_CALIBRATION_MCP_m_z_s_mx_f_r	0.1
RESULTS_SEARCH_11_PARAMETERS_MS_AUTO_CALIBRATION_OUT_avres	-3.47616e-10
RESULTS_SEARCH_11_PARAMETERS_MS_AUTO_CALIBRATION_OUT_c0	9.16258e-05
RESULTS_SEARCH_11_PARAMETERS_MS_AUTO_CALIBRATION_OUT_c1minus1	-1.6012e-06
RESULTS_SEARCH_11_PARAMETERS_MS_AUTO_CALIBRATION_OUT_c2	0
RESULTS_SEARCH_11_PARAMETERS_MS_AUTO_CALIBRATION_OUT_file	2
RESULTS_SEARCH_11_PARAMETERS_MS_AUTO_CALIBRATION_OUT_partnumber	6
RESULTS_SEARCH_11_PARAMETERS_MS_AUTO_CALIBRATION_OUT_polyorder	1
RESULTS_SEARCH_11_PARAMETERS_MS_AUTO_CALIBRATION_OUT_sample	1
RESULTS_SEARCH_11_PARAMETERS_MS_AUTO_CALIBRATION_OUT_squareroot	TRUE
RESULTS_SEARCH_11_PARAMETERS_MSMS_AUTO_CALIBRATION_OUT_avres	-2.40148e-07
RESULTS_SEARCH_11_PARAMETERS_MSMS_AUTO_CALIBRATION_OUT_c0	3.08691e-05
RESULTS_SEARCH_11_PARAMETERS_MSMS_AUTO_CALIBRATION_OUT_c1minus1	-1.75599e-06
RESULTS_SEARCH_11_PARAMETERS_MSMS_AUTO_CALIBRATION_OUT_c2	0
RESULTS_SEARCH_11_PARAMETERS_MSMS_AUTO_CALIBRATION_OUT_file	2
RESULTS_SEARCH_11_PARAMETERS_MSMS_AUTO_CALIBRATION_OUT_partnumber	6
RESULTS_SEARCH_11_PARAMETERS_MSMS_AUTO_CALIBRATION_OUT_polyorder	1900-01-01
RESULTS_SEARCH_11_PARAMETERS_MSMS_AUTO_CALIBRATION_OUT_sample	1
RESULTS_SEARCH_11_PARAMETERS_MSMS_AUTO_CALIBRATION_OUT_squareroot	TRUE
RESULTS_SEARCH_11_PARAMETERS_MAX_PRECURSORS_FRAGLET	5
RESULTS_SEARCH_11_PARAMETERS_MAX_PRECURSORS_TAGLET	1
RESULTS_SEARCH_11_PARAMETERS_PRECURSORS_DR_FRAGLET	10
RESULTS_SEARCH_11_PARAMETERS_PRECURSORS_DR_TAGLET	3
RESULTS_SEARCH_11_PARAMETERS_DEFAULT_CHARGE_STATE_1_charge	2
RESULTS_SEARCH_11_PARAMETERS_DEFAULT_CHARGE_STATE_1_probability	1
RESULTS_SEARCH_11_PARAMETERS_DEFAULT_CHARGE_STATE_2_charge	3
RESULTS_SEARCH_11_PARAMETERS_DEFAULT_CHARGE_STATE_2_probability	1
RESULTS_SEARCH_11_PARAMETERS_DEFAULT_CHARGE_STATE_3_charge	4
RESULTS_SEARCH_11_PARAMETERS_DEFAULT_CHARGE_STATE_3_probability	1
RESULTS_SEARCH_11_PARAMETERS_VERSION	5.0.1.0, 4895
RESULTS_SEARCH_11_PARAMETERS_PARAGON_VERSION	5.0.1.0, 4874
RESULTS_SEARCH_11_PARAMETERS_APPLICATION	ProteinPilot(tm) Software
RESULTS_SEARCH_11_PARAMETERS_PROGROUP_alternativedispositionmaximumfoldprobabilitydrop	100
RESULTS_SEARCH_11_PARAMETERS_PROGROUP_alternativedispositionmaximumfoldscoredrop	2
RESULTS_SEARCH_11_PARAMETERS_PROGROUP_autodiscordantpeptidethreshold	0.3
RESULTS_SEARCH_11_PARAMETERS_PROGROUP_bayesconfidencecalclulation	TRUE
RESULTS_SEARCH_11_PARAMETERS_PROGROUP_calibrateconfidence	TRUE
RESULTS_SEARCH_11_PARAMETERS_PROGROUP_compresspeptides	FALSE
RESULTS_SEARCH_11_PARAMETERS_PROGROUP_confidencepercentthresholdforexcludingothersfromquant	15
RESULTS_SEARCH_11_PARAMETERS_PROGROUP_confidencepercentthresholdforincludingselfinquant	15
RESULTS_SEARCH_11_PARAMETERS_PROGROUP_donotstoremspeaklists	FALSE
RESULTS_SEARCH_11_PARAMETERS_PROGROUP_fasta	C:\AB SCIEX\ProteinPilot Data\SearchDatabases\uniprot-zebrafish_with_Clover.fasta
RESULTS_SEARCH_11_PARAMETERS_PROGROUP_featuregroupminpepconf	0.66
RESULTS_SEARCH_11_PARAMETERS_PROGROUP_featuregroupminups	0.47
RESULTS_SEARCH_11_PARAMETERS_PROGROUP_focusingintersection	4
RESULTS_SEARCH_11_PARAMETERS_PROGROUP_focusingminimummatchconfidence	0.1
RESULTS_SEARCH_11_PARAMETERS_PROGROUP_focusingminunusedprotscore	0.1
RESULTS_SEARCH_11_PARAMETERS_PROGROUP_focusingsubsetcutoff	1900-01-06
RESULTS_SEARCH_11_PARAMETERS_PROGROUP_intersection	1900-01-01 07:12:00
RESULTS_SEARCH_11_PARAMETERS_PROGROUP_minimummatchconfidencecutoff	0.001
RESULTS_SEARCH_11_PARAMETERS_PROGROUP_minunusedprotscore	0.0458
RESULTS_SEARCH_11_PARAMETERS_PROGROUP_subsetcutoff	2
RESULTS_SEARCH_11_PARAMETERS_PROGROUP_unusedprotscorethresholdforexcludingothersfromquant	1.3
RESULTS_SEARCH_11_PARAMETERS_PEAKLIST_count	3321
RESULTS_SEARCH_11_PARAMETERS_PEAKLIST_filenumber	2
RESULTS_SEARCH_11_PARAMETERS_PEAKLIST_original_count	3321
RESULTS_SEARCH_11_PARAMETERS_PEAKLIST_originalfilename	C:\AB SCIEX\ProteinPilot Data\Results\Albert\ZX 20200429 6600\ZX 20200429 6600 C 2.wiff
RESULTS_SEARCH_11_PARAMETERS_PEAKLIST_partnumber	6
RESULTS_SEARCH_11_PARAMETERS_QUANT_TYPE_background_correction	FALSE
RESULTS_SEARCH_11_PARAMETERS_QUANT_TYPE_bias_correction	TRUE
RESULTS_SEARCH_11_PARAMETERS_QUANT_TYPE_keep_extreme_peptides_over_fraction	0
RESULTS_SEARCH_11_PARAMETERS_QUANT_TYPE_low_confidence_check	TRUE
RESULTS_SEARCH_11_PARAMETERS_QUANT_TYPE_low_intensity_check	TRUE
RESULTS_SEARCH_11_PARAMETERS_QUANT_TYPE_median_statistic	TRUE
RESULTS_SEARCH_11_PARAMETERS_QUANT_TYPE_mod_check	TRUE
RESULTS_SEARCH_11_PARAMETERS_QUANT_TYPE_quant_threshold	-1
RESULTS_SEARCH_11_PARAMETERS_QUANT_TYPE_quant_threshold_sn	9
RESULTS_SEARCH_11_PARAMETERS_QUANT_TYPE_separate_searches	FALSE
RESULTS_SEARCH_11_PARAMETERS_QUANT_TYPE_shared_msms_check	TRUE
RESULTS_SEARCH_11_PARAMETERS_PARAGON_METHOD_SETTINGS_UI_SAMPLE_TYPE	Identification
RESULTS_SEARCH_11_PARAMETERS_PARAGON_METHOD_SETTINGS_UI_CYS_ALKYLATION	Iodoacetamide w other Cys mods possible
RESULTS_SEARCH_11_PARAMETERS_PARAGON_METHOD_SETTINGS_UI_DIGESTION	Trypsin + Lys C
RESULTS_SEARCH_11_PARAMETERS_PARAGON_METHOD_SETTINGS_UI_SPECIAL_FACTOR	Gel-based ID
RESULTS_SEARCH_11_PARAMETERS_PARAGON_METHOD_SETTINGS_UI_INSTRUMENT	TripleTOF 6600
RESULTS_SEARCH_11_PARAMETERS_PARAGON_METHOD_SETTINGS_UI_SEARCH_EFFORT	Thorough
RESULTS_SEARCH_11_PARAMETERS_PARAGON_METHOD_SETTINGS_UI_USER_NAME	IMB-MASS02\massuser
RESULTS_SEARCH_11_PARAMETERS_PARAGON_METHOD_SETTINGS_UI_MACHINE_NAME	IMB-MASS02
RESULTS_SEARCH_11_PARAMETERS_PARAGON_METHOD_SETTINGS_UI_SEARCH_ID	6.37467e+17
RESULTS_SEARCH_11_PARAMETERS_PARAGON_METHOD_SETTINGS_UI_START_TIME	2021-01-19 16:07:13
RESULTS_SEARCH_11_PARAMETERS_PARAGON_METHOD_SETTINGS_UI_MIN_UNUSED_PROTSCORE	0.0458
RESULTS_SEARCH_11_PARAMETERS_PARAGON_METHOD_SETTINGS_UI_PSPEP	TRUE
RESULTS_SEARCH_12_time_cpu	441654
RESULTS_SEARCH_12_time_duration	473603
RESULTS_SEARCH_12_version	5.0.1.4874
RESULTS_SEARCH_12_xml:id	SEARCH:2:637466692301440684_5
RESULTS_SEARCH_12_PARAMETERS_chemical_data_edited	FALSE
RESULTS_SEARCH_12_PARAMETERS_do_multiprecursor_search	TRUE
RESULTS_SEARCH_12_PARAMETERS_do_reverse_search	TRUE
RESULTS_SEARCH_12_PARAMETERS_max_quant_labels	35
RESULTS_SEARCH_12_PARAMETERS_maxresults	1900-01-15
RESULTS_SEARCH_12_PARAMETERS_separate_searches	FALSE
RESULTS_SEARCH_12_PARAMETERS_MSTOLERANCE_type	dalton
RESULTS_SEARCH_12_PARAMETERS_MSTOLERANCE_value	0.05
RESULTS_SEARCH_12_PARAMETERS_MSMSTOLERANCE_type	dalton
RESULTS_SEARCH_12_PARAMETERS_MSMSTOLERANCE_value	0.1
RESULTS_SEARCH_12_PARAMETERS_MS_STANDARD_DEVIATION_type	dalton
RESULTS_SEARCH_12_PARAMETERS_MS_STANDARD_DEVIATION_value	0.0011
RESULTS_SEARCH_12_PARAMETERS_MSMS_STANDARD_DEVIATION_type	dalton
RESULTS_SEARCH_12_PARAMETERS_MSMS_STANDARD_DEVIATION_value	0.01
RESULTS_SEARCH_12_PARAMETERS_FASTA_filename	C:\AB SCIEX\ProteinPilot Data\SearchDatabases\uniprot-zebrafish_with_Clover.fasta
RESULTS_SEARCH_12_PARAMETERS_AUTO_CALIBRATION_ms	TRUE
RESULTS_SEARCH_12_PARAMETERS_AUTO_CALIBRATION_msexport	FALSE
RESULTS_SEARCH_12_PARAMETERS_AUTO_CALIBRATION_msms	TRUE
RESULTS_SEARCH_12_PARAMETERS_AUTO_CALIBRATION_msmstolsdratio	2.75
RESULTS_SEARCH_12_PARAMETERS_AUTO_CALIBRATION_mstolsdratio	7
RESULTS_SEARCH_12_PARAMETERS_AUTO_CALIBRATION_squareroot	TRUE
RESULTS_SEARCH_12_PARAMETERS_AUTO_CALIBRATION_type	dalton
RESULTS_SEARCH_12_PARAMETERS_AUTO_CALIBRATION_MCP_d_s_s_f	0.0666667
RESULTS_SEARCH_12_PARAMETERS_AUTO_CALIBRATION_MCP_d_s_w_f	3
RESULTS_SEARCH_12_PARAMETERS_AUTO_CALIBRATION_MCP_m_f_r_mbc	200
RESULTS_SEARCH_12_PARAMETERS_AUTO_CALIBRATION_MCP_m_m_c	10
RESULTS_SEARCH_12_PARAMETERS_AUTO_CALIBRATION_MCP_m_m_f_s	0.25
RESULTS_SEARCH_12_PARAMETERS_AUTO_CALIBRATION_MCP_m_m_p_f	0.33
RESULTS_SEARCH_12_PARAMETERS_AUTO_CALIBRATION_MCP_m_m_p_rms_f	1
RESULTS_SEARCH_12_PARAMETERS_AUTO_CALIBRATION_MCP_m_p_t_f	1
RESULTS_SEARCH_12_PARAMETERS_AUTO_CALIBRATION_MCP_m_r_h_n_b	15
RESULTS_SEARCH_12_PARAMETERS_AUTO_CALIBRATION_MCP_m_z_n_s	99
RESULTS_SEARCH_12_PARAMETERS_AUTO_CALIBRATION_MCP_m_z_s_mn_f_r	0.0666667
RESULTS_SEARCH_12_PARAMETERS_AUTO_CALIBRATION_MCP_m_z_s_mx_f_r	0.1
RESULTS_SEARCH_12_PARAMETERS_MS_AUTO_CALIBRATION_OUT_avres	-3.47616e-10
RESULTS_SEARCH_12_PARAMETERS_MS_AUTO_CALIBRATION_OUT_c0	9.16258e-05
RESULTS_SEARCH_12_PARAMETERS_MS_AUTO_CALIBRATION_OUT_c1minus1	-1.6012e-06
RESULTS_SEARCH_12_PARAMETERS_MS_AUTO_CALIBRATION_OUT_c2	0
RESULTS_SEARCH_12_PARAMETERS_MS_AUTO_CALIBRATION_OUT_file	2
RESULTS_SEARCH_12_PARAMETERS_MS_AUTO_CALIBRATION_OUT_partnumber	6
RESULTS_SEARCH_12_PARAMETERS_MS_AUTO_CALIBRATION_OUT_polyorder	1
RESULTS_SEARCH_12_PARAMETERS_MS_AUTO_CALIBRATION_OUT_sample	1
RESULTS_SEARCH_12_PARAMETERS_MS_AUTO_CALIBRATION_OUT_squareroot	TRUE
RESULTS_SEARCH_12_PARAMETERS_MSMS_AUTO_CALIBRATION_OUT_avres	-2.40148e-07
RESULTS_SEARCH_12_PARAMETERS_MSMS_AUTO_CALIBRATION_OUT_c0	3.08691e-05
RESULTS_SEARCH_12_PARAMETERS_MSMS_AUTO_CALIBRATION_OUT_c1minus1	-1.75599e-06
RESULTS_SEARCH_12_PARAMETERS_MSMS_AUTO_CALIBRATION_OUT_c2	0
RESULTS_SEARCH_12_PARAMETERS_MSMS_AUTO_CALIBRATION_OUT_file	2
RESULTS_SEARCH_12_PARAMETERS_MSMS_AUTO_CALIBRATION_OUT_partnumber	6
RESULTS_SEARCH_12_PARAMETERS_MSMS_AUTO_CALIBRATION_OUT_polyorder	1
RESULTS_SEARCH_12_PARAMETERS_MSMS_AUTO_CALIBRATION_OUT_sample	1
RESULTS_SEARCH_12_PARAMETERS_MSMS_AUTO_CALIBRATION_OUT_squareroot	TRUE
RESULTS_SEARCH_12_PARAMETERS_MAX_PRECURSORS_FRAGLET	5
RESULTS_SEARCH_12_PARAMETERS_MAX_PRECURSORS_TAGLET	1
RESULTS_SEARCH_12_PARAMETERS_PRECURSORS_DR_FRAGLET	10
RESULTS_SEARCH_12_PARAMETERS_PRECURSORS_DR_TAGLET	3
RESULTS_SEARCH_12_PARAMETERS_DEFAULT_CHARGE_STATE_1_charge	2
RESULTS_SEARCH_12_PARAMETERS_DEFAULT_CHARGE_STATE_1_probability	1
RESULTS_SEARCH_12_PARAMETERS_DEFAULT_CHARGE_STATE_2_charge	3
RESULTS_SEARCH_12_PARAMETERS_DEFAULT_CHARGE_STATE_2_probability	1
RESULTS_SEARCH_12_PARAMETERS_DEFAULT_CHARGE_STATE_3_charge	4
RESULTS_SEARCH_12_PARAMETERS_DEFAULT_CHARGE_STATE_3_probability	1
RESULTS_SEARCH_12_PARAMETERS_VERSION	5.0.1.0, 4895
RESULTS_SEARCH_12_PARAMETERS_PARAGON_VERSION	5.0.1.0, 4874
RESULTS_SEARCH_12_PARAMETERS_APPLICATION	ProteinPilot(tm) Software
RESULTS_SEARCH_12_PARAMETERS_PROGROUP_alternativedispositionmaximumfoldprobabilitydrop	100
RESULTS_SEARCH_12_PARAMETERS_PROGROUP_alternativedispositionmaximumfoldscoredrop	2
RESULTS_SEARCH_12_PARAMETERS_PROGROUP_autodiscordantpeptidethreshold	0.3
RESULTS_SEARCH_12_PARAMETERS_PROGROUP_bayesconfidencecalclulation	TRUE
RESULTS_SEARCH_12_PARAMETERS_PROGROUP_calibrateconfidence	TRUE
RESULTS_SEARCH_12_PARAMETERS_PROGROUP_compresspeptides	FALSE
RESULTS_SEARCH_12_PARAMETERS_PROGROUP_confidencepercentthresholdforexcludingothersfromquant	1900-01-15
RESULTS_SEARCH_12_PARAMETERS_PROGROUP_confidencepercentthresholdforincludingselfinquant	15
RESULTS_SEARCH_12_PARAMETERS_PROGROUP_donotstoremspeaklists	FALSE
RESULTS_SEARCH_12_PARAMETERS_PROGROUP_fasta	C:\AB SCIEX\ProteinPilot Data\SearchDatabases\uniprot-zebrafish_with_Clover.fasta
RESULTS_SEARCH_12_PARAMETERS_PROGROUP_featuregroupminpepconf	0.66
RESULTS_SEARCH_12_PARAMETERS_PROGROUP_featuregroupminups	0.47
RESULTS_SEARCH_12_PARAMETERS_PROGROUP_focusingintersection	4
RESULTS_SEARCH_12_PARAMETERS_PROGROUP_focusingminimummatchconfidence	0.1
RESULTS_SEARCH_12_PARAMETERS_PROGROUP_focusingminunusedprotscore	0.1
RESULTS_SEARCH_12_PARAMETERS_PROGROUP_focusingsubsetcutoff	6
RESULTS_SEARCH_12_PARAMETERS_PROGROUP_intersection	1.3
RESULTS_SEARCH_12_PARAMETERS_PROGROUP_minimummatchconfidencecutoff	0.001
RESULTS_SEARCH_12_PARAMETERS_PROGROUP_minunusedprotscore	0.0458
RESULTS_SEARCH_12_PARAMETERS_PROGROUP_subsetcutoff	2
RESULTS_SEARCH_12_PARAMETERS_PROGROUP_unusedprotscorethresholdforexcludingothersfromquant	1.3
RESULTS_SEARCH_12_PARAMETERS_PEAKLIST_count	3321
RESULTS_SEARCH_12_PARAMETERS_PEAKLIST_filenumber	2
RESULTS_SEARCH_12_PARAMETERS_PEAKLIST_original_count	3321
RESULTS_SEARCH_12_PARAMETERS_PEAKLIST_originalfilename	C:\AB SCIEX\ProteinPilot Data\Results\Albert\ZX 20200429 6600\ZX 20200429 6600 C 2.wiff
RESULTS_SEARCH_12_PARAMETERS_PEAKLIST_partnumber	6
RESULTS_SEARCH_12_PARAMETERS_QUANT_TYPE_background_correction	FALSE
RESULTS_SEARCH_12_PARAMETERS_QUANT_TYPE_bias_correction	TRUE
RESULTS_SEARCH_12_PARAMETERS_QUANT_TYPE_keep_extreme_peptides_over_fraction	0
RESULTS_SEARCH_12_PARAMETERS_QUANT_TYPE_low_confidence_check	TRUE
RESULTS_SEARCH_12_PARAMETERS_QUANT_TYPE_low_intensity_check	TRUE
RESULTS_SEARCH_12_PARAMETERS_QUANT_TYPE_median_statistic	TRUE
RESULTS_SEARCH_12_PARAMETERS_QUANT_TYPE_mod_check	TRUE
RESULTS_SEARCH_12_PARAMETERS_QUANT_TYPE_quant_threshold	-1
RESULTS_SEARCH_12_PARAMETERS_QUANT_TYPE_quant_threshold_sn	1900-01-09
RESULTS_SEARCH_12_PARAMETERS_QUANT_TYPE_separate_searches	FALSE
RESULTS_SEARCH_12_PARAMETERS_QUANT_TYPE_shared_msms_check	TRUE
RESULTS_SEARCH_12_PARAMETERS_PARAGON_METHOD_SETTINGS_UI_SAMPLE_TYPE	Identification
RESULTS_SEARCH_12_PARAMETERS_PARAGON_METHOD_SETTINGS_UI_CYS_ALKYLATION	Iodoacetamide w other Cys mods possible
RESULTS_SEARCH_12_PARAMETERS_PARAGON_METHOD_SETTINGS_UI_DIGESTION	Trypsin + Lys C
RESULTS_SEARCH_12_PARAMETERS_PARAGON_METHOD_SETTINGS_UI_SPECIAL_FACTOR	Gel-based ID
RESULTS_SEARCH_12_PARAMETERS_PARAGON_METHOD_SETTINGS_UI_INSTRUMENT	TripleTOF 6600
RESULTS_SEARCH_12_PARAMETERS_PARAGON_METHOD_SETTINGS_UI_SEARCH_EFFORT	Thorough
RESULTS_SEARCH_12_PARAMETERS_PARAGON_METHOD_SETTINGS_UI_USER_NAME	IMB-MASS02\massuser
RESULTS_SEARCH_12_PARAMETERS_PARAGON_METHOD_SETTINGS_UI_MACHINE_NAME	IMB-MASS02
RESULTS_SEARCH_12_PARAMETERS_PARAGON_METHOD_SETTINGS_UI_SEARCH_ID	6.37467e+17
RESULTS_SEARCH_12_PARAMETERS_PARAGON_METHOD_SETTINGS_UI_START_TIME	2021-01-19 16:07:13
RESULTS_SEARCH_12_PARAMETERS_PARAGON_METHOD_SETTINGS_UI_MIN_UNUSED_PROTSCORE	0.0458
RESULTS_SEARCH_12_PARAMETERS_PARAGON_METHOD_SETTINGS_UI_PSPEP	TRUE
RESULTS_SEARCH_13_time_cpu	212754
RESULTS_SEARCH_13_time_duration	261450
RESULTS_SEARCH_13_version	5.0.1.4874
RESULTS_SEARCH_13_xml:id	SEARCH:1:637466692301440684_6
RESULTS_SEARCH_13_PARAMETERS_chemical_data_edited	FALSE
RESULTS_SEARCH_13_PARAMETERS_do_multiprecursor_search	TRUE
RESULTS_SEARCH_13_PARAMETERS_do_reverse_search	TRUE
RESULTS_SEARCH_13_PARAMETERS_max_quant_labels	35
RESULTS_SEARCH_13_PARAMETERS_maxresults	15
RESULTS_SEARCH_13_PARAMETERS_separate_searches	FALSE
RESULTS_SEARCH_13_PARAMETERS_MSTOLERANCE_type	dalton
RESULTS_SEARCH_13_PARAMETERS_MSTOLERANCE_value	0.05
RESULTS_SEARCH_13_PARAMETERS_MSMSTOLERANCE_type	dalton
RESULTS_SEARCH_13_PARAMETERS_MSMSTOLERANCE_value	0.1
RESULTS_SEARCH_13_PARAMETERS_MS_STANDARD_DEVIATION_type	dalton
RESULTS_SEARCH_13_PARAMETERS_MS_STANDARD_DEVIATION_value	0.0011
RESULTS_SEARCH_13_PARAMETERS_MSMS_STANDARD_DEVIATION_type	dalton
RESULTS_SEARCH_13_PARAMETERS_MSMS_STANDARD_DEVIATION_value	0.01
RESULTS_SEARCH_13_PARAMETERS_FASTA_filename	C:\AB SCIEX\ProteinPilot Data\SearchDatabases\uniprot-zebrafish_with_Clover.fasta
RESULTS_SEARCH_13_PARAMETERS_AUTO_CALIBRATION_ms	TRUE
RESULTS_SEARCH_13_PARAMETERS_AUTO_CALIBRATION_msexport	FALSE
RESULTS_SEARCH_13_PARAMETERS_AUTO_CALIBRATION_msms	TRUE
RESULTS_SEARCH_13_PARAMETERS_AUTO_CALIBRATION_msmstolsdratio	2.75
RESULTS_SEARCH_13_PARAMETERS_AUTO_CALIBRATION_mstolsdratio	7
RESULTS_SEARCH_13_PARAMETERS_AUTO_CALIBRATION_squareroot	TRUE
RESULTS_SEARCH_13_PARAMETERS_AUTO_CALIBRATION_type	dalton
RESULTS_SEARCH_13_PARAMETERS_AUTO_CALIBRATION_MCP_d_s_s_f	0.0666667
RESULTS_SEARCH_13_PARAMETERS_AUTO_CALIBRATION_MCP_d_s_w_f	3
RESULTS_SEARCH_13_PARAMETERS_AUTO_CALIBRATION_MCP_m_f_r_mbc	200
RESULTS_SEARCH_13_PARAMETERS_AUTO_CALIBRATION_MCP_m_m_c	10
RESULTS_SEARCH_13_PARAMETERS_AUTO_CALIBRATION_MCP_m_m_f_s	0.25
RESULTS_SEARCH_13_PARAMETERS_AUTO_CALIBRATION_MCP_m_m_p_f	0.33
RESULTS_SEARCH_13_PARAMETERS_AUTO_CALIBRATION_MCP_m_m_p_rms_f	1
RESULTS_SEARCH_13_PARAMETERS_AUTO_CALIBRATION_MCP_m_p_t_f	1
RESULTS_SEARCH_13_PARAMETERS_AUTO_CALIBRATION_MCP_m_r_h_n_b	15
RESULTS_SEARCH_13_PARAMETERS_AUTO_CALIBRATION_MCP_m_z_n_s	99
RESULTS_SEARCH_13_PARAMETERS_AUTO_CALIBRATION_MCP_m_z_s_mn_f_r	0.0666667
RESULTS_SEARCH_13_PARAMETERS_AUTO_CALIBRATION_MCP_m_z_s_mx_f_r	0.1
RESULTS_SEARCH_13_PARAMETERS_MS_AUTO_CALIBRATION_OUT_avres	-9.1621e-09
RESULTS_SEARCH_13_PARAMETERS_MS_AUTO_CALIBRATION_OUT_c0	-5.88271e-05
RESULTS_SEARCH_13_PARAMETERS_MS_AUTO_CALIBRATION_OUT_c1minus1	3.12103e-06
RESULTS_SEARCH_13_PARAMETERS_MS_AUTO_CALIBRATION_OUT_c2	0
RESULTS_SEARCH_13_PARAMETERS_MS_AUTO_CALIBRATION_OUT_file	3
RESULTS_SEARCH_13_PARAMETERS_MS_AUTO_CALIBRATION_OUT_partnumber	7
RESULTS_SEARCH_13_PARAMETERS_MS_AUTO_CALIBRATION_OUT_polyorder	1
RESULTS_SEARCH_13_PARAMETERS_MS_AUTO_CALIBRATION_OUT_sample	1
RESULTS_SEARCH_13_PARAMETERS_MS_AUTO_CALIBRATION_OUT_squareroot	TRUE
RESULTS_SEARCH_13_PARAMETERS_MSMS_AUTO_CALIBRATION_OUT_avres	-5.57123e-08
RESULTS_SEARCH_13_PARAMETERS_MSMS_AUTO_CALIBRATION_OUT_c0	-3.8644e-06
RESULTS_SEARCH_13_PARAMETERS_MSMS_AUTO_CALIBRATION_OUT_c1minus1	-8.0113e-07
RESULTS_SEARCH_13_PARAMETERS_MSMS_AUTO_CALIBRATION_OUT_c2	0
RESULTS_SEARCH_13_PARAMETERS_MSMS_AUTO_CALIBRATION_OUT_file	3
RESULTS_SEARCH_13_PARAMETERS_MSMS_AUTO_CALIBRATION_OUT_partnumber	7
RESULTS_SEARCH_13_PARAMETERS_MSMS_AUTO_CALIBRATION_OUT_polyorder	1
RESULTS_SEARCH_13_PARAMETERS_MSMS_AUTO_CALIBRATION_OUT_sample	1
RESULTS_SEARCH_13_PARAMETERS_MSMS_AUTO_CALIBRATION_OUT_squareroot	TRUE
RESULTS_SEARCH_13_PARAMETERS_MAX_PRECURSORS_FRAGLET	5
RESULTS_SEARCH_13_PARAMETERS_MAX_PRECURSORS_TAGLET	1
RESULTS_SEARCH_13_PARAMETERS_PRECURSORS_DR_FRAGLET	10
RESULTS_SEARCH_13_PARAMETERS_PRECURSORS_DR_TAGLET	3
RESULTS_SEARCH_13_PARAMETERS_DEFAULT_CHARGE_STATE_1_charge	2
RESULTS_SEARCH_13_PARAMETERS_DEFAULT_CHARGE_STATE_1_probability	1
RESULTS_SEARCH_13_PARAMETERS_DEFAULT_CHARGE_STATE_2_charge	3
RESULTS_SEARCH_13_PARAMETERS_DEFAULT_CHARGE_STATE_2_probability	1
RESULTS_SEARCH_13_PARAMETERS_DEFAULT_CHARGE_STATE_3_charge	4
RESULTS_SEARCH_13_PARAMETERS_DEFAULT_CHARGE_STATE_3_probability	1
RESULTS_SEARCH_13_PARAMETERS_VERSION	5.0.1.0, 4895
RESULTS_SEARCH_13_PARAMETERS_PARAGON_VERSION	5.0.1.0, 4874
RESULTS_SEARCH_13_PARAMETERS_APPLICATION	ProteinPilot(tm) Software
RESULTS_SEARCH_13_PARAMETERS_PROGROUP_alternativedispositionmaximumfoldprobabilitydrop	100
RESULTS_SEARCH_13_PARAMETERS_PROGROUP_alternativedispositionmaximumfoldscoredrop	2
RESULTS_SEARCH_13_PARAMETERS_PROGROUP_autodiscordantpeptidethreshold	0.3
RESULTS_SEARCH_13_PARAMETERS_PROGROUP_bayesconfidencecalclulation	TRUE
RESULTS_SEARCH_13_PARAMETERS_PROGROUP_calibrateconfidence	TRUE
RESULTS_SEARCH_13_PARAMETERS_PROGROUP_compresspeptides	FALSE
RESULTS_SEARCH_13_PARAMETERS_PROGROUP_confidencepercentthresholdforexcludingothersfromquant	15
RESULTS_SEARCH_13_PARAMETERS_PROGROUP_confidencepercentthresholdforincludingselfinquant	15
RESULTS_SEARCH_13_PARAMETERS_PROGROUP_donotstoremspeaklists	FALSE
RESULTS_SEARCH_13_PARAMETERS_PROGROUP_fasta	C:\AB SCIEX\ProteinPilot Data\SearchDatabases\uniprot-zebrafish_with_Clover.fasta
RESULTS_SEARCH_13_PARAMETERS_PROGROUP_featuregroupminpepconf	0.66
RESULTS_SEARCH_13_PARAMETERS_PROGROUP_featuregroupminups	0.47
RESULTS_SEARCH_13_PARAMETERS_PROGROUP_focusingintersection	4
RESULTS_SEARCH_13_PARAMETERS_PROGROUP_focusingminimummatchconfidence	0.1
RESULTS_SEARCH_13_PARAMETERS_PROGROUP_focusingminunusedprotscore	0.1
RESULTS_SEARCH_13_PARAMETERS_PROGROUP_focusingsubsetcutoff	6
RESULTS_SEARCH_13_PARAMETERS_PROGROUP_intersection	1.3
RESULTS_SEARCH_13_PARAMETERS_PROGROUP_minimummatchconfidencecutoff	0.001
RESULTS_SEARCH_13_PARAMETERS_PROGROUP_minunusedprotscore	0.0458
RESULTS_SEARCH_13_PARAMETERS_PROGROUP_subsetcutoff	2
RESULTS_SEARCH_13_PARAMETERS_PROGROUP_unusedprotscorethresholdforexcludingothersfromquant	1.3
RESULTS_SEARCH_13_PARAMETERS_PEAKLIST_count	3929
RESULTS_SEARCH_13_PARAMETERS_PEAKLIST_filenumber	3
RESULTS_SEARCH_13_PARAMETERS_PEAKLIST_original_count	3929
RESULTS_SEARCH_13_PARAMETERS_PEAKLIST_originalfilename	C:\AB SCIEX\ProteinPilot Data\Results\Albert\ZX 20200429 6600\ZX 20200429 6600 C 3.wiff
RESULTS_SEARCH_13_PARAMETERS_PEAKLIST_partnumber	7
RESULTS_SEARCH_13_PARAMETERS_QUANT_TYPE_background_correction	FALSE
RESULTS_SEARCH_13_PARAMETERS_QUANT_TYPE_bias_correction	TRUE
RESULTS_SEARCH_13_PARAMETERS_QUANT_TYPE_keep_extreme_peptides_over_fraction	00:00:00
RESULTS_SEARCH_13_PARAMETERS_QUANT_TYPE_low_confidence_check	TRUE
RESULTS_SEARCH_13_PARAMETERS_QUANT_TYPE_low_intensity_check	TRUE
RESULTS_SEARCH_13_PARAMETERS_QUANT_TYPE_median_statistic	TRUE
RESULTS_SEARCH_13_PARAMETERS_QUANT_TYPE_mod_check	TRUE
RESULTS_SEARCH_13_PARAMETERS_QUANT_TYPE_quant_threshold	1899-12-29
RESULTS_SEARCH_13_PARAMETERS_QUANT_TYPE_quant_threshold_sn	9
RESULTS_SEARCH_13_PARAMETERS_QUANT_TYPE_separate_searches	FALSE
RESULTS_SEARCH_13_PARAMETERS_QUANT_TYPE_shared_msms_check	TRUE
RESULTS_SEARCH_13_PARAMETERS_PARAGON_METHOD_SETTINGS_UI_SAMPLE_TYPE	Identification
RESULTS_SEARCH_13_PARAMETERS_PARAGON_METHOD_SETTINGS_UI_CYS_ALKYLATION	Iodoacetamide w other Cys mods possible
RESULTS_SEARCH_13_PARAMETERS_PARAGON_METHOD_SETTINGS_UI_DIGESTION	Trypsin + Lys C
RESULTS_SEARCH_13_PARAMETERS_PARAGON_METHOD_SETTINGS_UI_SPECIAL_FACTOR	Gel-based ID
RESULTS_SEARCH_13_PARAMETERS_PARAGON_METHOD_SETTINGS_UI_INSTRUMENT	TripleTOF 6600
RESULTS_SEARCH_13_PARAMETERS_PARAGON_METHOD_SETTINGS_UI_SEARCH_EFFORT	Thorough
RESULTS_SEARCH_13_PARAMETERS_PARAGON_METHOD_SETTINGS_UI_USER_NAME	IMB-MASS02\massuser
RESULTS_SEARCH_13_PARAMETERS_PARAGON_METHOD_SETTINGS_UI_MACHINE_NAME	IMB-MASS02
RESULTS_SEARCH_13_PARAMETERS_PARAGON_METHOD_SETTINGS_UI_SEARCH_ID	6.37467e+17
RESULTS_SEARCH_13_PARAMETERS_PARAGON_METHOD_SETTINGS_UI_START_TIME	2021-01-19 16:07:13
RESULTS_SEARCH_13_PARAMETERS_PARAGON_METHOD_SETTINGS_UI_MIN_UNUSED_PROTSCORE	0.0458
RESULTS_SEARCH_13_PARAMETERS_PARAGON_METHOD_SETTINGS_UI_PSPEP	TRUE
RESULTS_SEARCH_14_time_cpu	225171
RESULTS_SEARCH_14_time_duration	265584
RESULTS_SEARCH_14_version	5.0.1.4874
RESULTS_SEARCH_14_xml:id	SEARCH:2:637466692301440684_6
RESULTS_SEARCH_14_PARAMETERS_chemical_data_edited	FALSE
RESULTS_SEARCH_14_PARAMETERS_do_multiprecursor_search	TRUE
RESULTS_SEARCH_14_PARAMETERS_do_reverse_search	TRUE
RESULTS_SEARCH_14_PARAMETERS_max_quant_labels	35
RESULTS_SEARCH_14_PARAMETERS_maxresults	15
RESULTS_SEARCH_14_PARAMETERS_separate_searches	FALSE
RESULTS_SEARCH_14_PARAMETERS_MSTOLERANCE_type	dalton
RESULTS_SEARCH_14_PARAMETERS_MSTOLERANCE_value	0.05
RESULTS_SEARCH_14_PARAMETERS_MSMSTOLERANCE_type	dalton
RESULTS_SEARCH_14_PARAMETERS_MSMSTOLERANCE_value	0.1
RESULTS_SEARCH_14_PARAMETERS_MS_STANDARD_DEVIATION_type	dalton
RESULTS_SEARCH_14_PARAMETERS_MS_STANDARD_DEVIATION_value	0.0011
RESULTS_SEARCH_14_PARAMETERS_MSMS_STANDARD_DEVIATION_type	dalton
RESULTS_SEARCH_14_PARAMETERS_MSMS_STANDARD_DEVIATION_value	0.01
RESULTS_SEARCH_14_PARAMETERS_FASTA_filename	C:\AB SCIEX\ProteinPilot Data\SearchDatabases\uniprot-zebrafish_with_Clover.fasta
RESULTS_SEARCH_14_PARAMETERS_AUTO_CALIBRATION_ms	TRUE
RESULTS_SEARCH_14_PARAMETERS_AUTO_CALIBRATION_msexport	FALSE
RESULTS_SEARCH_14_PARAMETERS_AUTO_CALIBRATION_msms	TRUE
RESULTS_SEARCH_14_PARAMETERS_AUTO_CALIBRATION_msmstolsdratio	2.75
RESULTS_SEARCH_14_PARAMETERS_AUTO_CALIBRATION_mstolsdratio	7
RESULTS_SEARCH_14_PARAMETERS_AUTO_CALIBRATION_squareroot	TRUE
RESULTS_SEARCH_14_PARAMETERS_AUTO_CALIBRATION_type	dalton
RESULTS_SEARCH_14_PARAMETERS_AUTO_CALIBRATION_MCP_d_s_s_f	0.0666667
RESULTS_SEARCH_14_PARAMETERS_AUTO_CALIBRATION_MCP_d_s_w_f	3
RESULTS_SEARCH_14_PARAMETERS_AUTO_CALIBRATION_MCP_m_f_r_mbc	200
RESULTS_SEARCH_14_PARAMETERS_AUTO_CALIBRATION_MCP_m_m_c	10
RESULTS_SEARCH_14_PARAMETERS_AUTO_CALIBRATION_MCP_m_m_f_s	0.25
RESULTS_SEARCH_14_PARAMETERS_AUTO_CALIBRATION_MCP_m_m_p_f	0.33
RESULTS_SEARCH_14_PARAMETERS_AUTO_CALIBRATION_MCP_m_m_p_rms_f	1
RESULTS_SEARCH_14_PARAMETERS_AUTO_CALIBRATION_MCP_m_p_t_f	1
RESULTS_SEARCH_14_PARAMETERS_AUTO_CALIBRATION_MCP_m_r_h_n_b	15
RESULTS_SEARCH_14_PARAMETERS_AUTO_CALIBRATION_MCP_m_z_n_s	99
RESULTS_SEARCH_14_PARAMETERS_AUTO_CALIBRATION_MCP_m_z_s_mn_f_r	0.0666667
RESULTS_SEARCH_14_PARAMETERS_AUTO_CALIBRATION_MCP_m_z_s_mx_f_r	0.1
RESULTS_SEARCH_14_PARAMETERS_MS_AUTO_CALIBRATION_OUT_avres	-9.1621e-09
RESULTS_SEARCH_14_PARAMETERS_MS_AUTO_CALIBRATION_OUT_c0	-5.88271e-05
RESULTS_SEARCH_14_PARAMETERS_MS_AUTO_CALIBRATION_OUT_c1minus1	3.12103e-06
RESULTS_SEARCH_14_PARAMETERS_MS_AUTO_CALIBRATION_OUT_c2	0
RESULTS_SEARCH_14_PARAMETERS_MS_AUTO_CALIBRATION_OUT_file	3
RESULTS_SEARCH_14_PARAMETERS_MS_AUTO_CALIBRATION_OUT_partnumber	7
RESULTS_SEARCH_14_PARAMETERS_MS_AUTO_CALIBRATION_OUT_polyorder	1
RESULTS_SEARCH_14_PARAMETERS_MS_AUTO_CALIBRATION_OUT_sample	1
RESULTS_SEARCH_14_PARAMETERS_MS_AUTO_CALIBRATION_OUT_squareroot	TRUE
RESULTS_SEARCH_14_PARAMETERS_MSMS_AUTO_CALIBRATION_OUT_avres	-5.57123e-08
RESULTS_SEARCH_14_PARAMETERS_MSMS_AUTO_CALIBRATION_OUT_c0	-3.8644e-06
RESULTS_SEARCH_14_PARAMETERS_MSMS_AUTO_CALIBRATION_OUT_c1minus1	-8.0113e-07
RESULTS_SEARCH_14_PARAMETERS_MSMS_AUTO_CALIBRATION_OUT_c2	0
RESULTS_SEARCH_14_PARAMETERS_MSMS_AUTO_CALIBRATION_OUT_file	3
RESULTS_SEARCH_14_PARAMETERS_MSMS_AUTO_CALIBRATION_OUT_partnumber	7
RESULTS_SEARCH_14_PARAMETERS_MSMS_AUTO_CALIBRATION_OUT_polyorder	1
RESULTS_SEARCH_14_PARAMETERS_MSMS_AUTO_CALIBRATION_OUT_sample	1
RESULTS_SEARCH_14_PARAMETERS_MSMS_AUTO_CALIBRATION_OUT_squareroot	TRUE
RESULTS_SEARCH_14_PARAMETERS_MAX_PRECURSORS_FRAGLET	5
RESULTS_SEARCH_14_PARAMETERS_MAX_PRECURSORS_TAGLET	1
RESULTS_SEARCH_14_PARAMETERS_PRECURSORS_DR_FRAGLET	10
RESULTS_SEARCH_14_PARAMETERS_PRECURSORS_DR_TAGLET	3
RESULTS_SEARCH_14_PARAMETERS_DEFAULT_CHARGE_STATE_1_charge	2
RESULTS_SEARCH_14_PARAMETERS_DEFAULT_CHARGE_STATE_1_probability	1
RESULTS_SEARCH_14_PARAMETERS_DEFAULT_CHARGE_STATE_2_charge	3
RESULTS_SEARCH_14_PARAMETERS_DEFAULT_CHARGE_STATE_2_probability	1
RESULTS_SEARCH_14_PARAMETERS_DEFAULT_CHARGE_STATE_3_charge	4
RESULTS_SEARCH_14_PARAMETERS_DEFAULT_CHARGE_STATE_3_probability	1
RESULTS_SEARCH_14_PARAMETERS_VERSION	5.0.1.0, 4895
RESULTS_SEARCH_14_PARAMETERS_PARAGON_VERSION	5.0.1.0, 4874
RESULTS_SEARCH_14_PARAMETERS_APPLICATION	ProteinPilot(tm) Software
RESULTS_SEARCH_14_PARAMETERS_PROGROUP_alternativedispositionmaximumfoldprobabilitydrop	100
RESULTS_SEARCH_14_PARAMETERS_PROGROUP_alternativedispositionmaximumfoldscoredrop	2
RESULTS_SEARCH_14_PARAMETERS_PROGROUP_autodiscordantpeptidethreshold	0.3
RESULTS_SEARCH_14_PARAMETERS_PROGROUP_bayesconfidencecalclulation	TRUE
RESULTS_SEARCH_14_PARAMETERS_PROGROUP_calibrateconfidence	TRUE
RESULTS_SEARCH_14_PARAMETERS_PROGROUP_compresspeptides	FALSE
RESULTS_SEARCH_14_PARAMETERS_PROGROUP_confidencepercentthresholdforexcludingothersfromquant	15
RESULTS_SEARCH_14_PARAMETERS_PROGROUP_confidencepercentthresholdforincludingselfinquant	15
RESULTS_SEARCH_14_PARAMETERS_PROGROUP_donotstoremspeaklists	FALSE
RESULTS_SEARCH_14_PARAMETERS_PROGROUP_fasta	C:\AB SCIEX\ProteinPilot Data\SearchDatabases\uniprot-zebrafish_with_Clover.fasta
RESULTS_SEARCH_14_PARAMETERS_PROGROUP_featuregroupminpepconf	0.66
RESULTS_SEARCH_14_PARAMETERS_PROGROUP_featuregroupminups	0.47
RESULTS_SEARCH_14_PARAMETERS_PROGROUP_focusingintersection	4
RESULTS_SEARCH_14_PARAMETERS_PROGROUP_focusingminimummatchconfidence	0.1
RESULTS_SEARCH_14_PARAMETERS_PROGROUP_focusingminunusedprotscore	0.1
RESULTS_SEARCH_14_PARAMETERS_PROGROUP_focusingsubsetcutoff	6
RESULTS_SEARCH_14_PARAMETERS_PROGROUP_intersection	1.3
RESULTS_SEARCH_14_PARAMETERS_PROGROUP_minimummatchconfidencecutoff	0.001
RESULTS_SEARCH_14_PARAMETERS_PROGROUP_minunusedprotscore	0.0458
RESULTS_SEARCH_14_PARAMETERS_PROGROUP_subsetcutoff	2
RESULTS_SEARCH_14_PARAMETERS_PROGROUP_unusedprotscorethresholdforexcludingothersfromquant	1.3
RESULTS_SEARCH_14_PARAMETERS_PEAKLIST_count	3929
RESULTS_SEARCH_14_PARAMETERS_PEAKLIST_filenumber	3
RESULTS_SEARCH_14_PARAMETERS_PEAKLIST_original_count	3929
RESULTS_SEARCH_14_PARAMETERS_PEAKLIST_originalfilename	C:\AB SCIEX\ProteinPilot Data\Results\Albert\ZX 20200429 6600\ZX 20200429 6600 C 3.wiff
RESULTS_SEARCH_14_PARAMETERS_PEAKLIST_partnumber	7
RESULTS_SEARCH_14_PARAMETERS_QUANT_TYPE_background_correction	FALSE
RESULTS_SEARCH_14_PARAMETERS_QUANT_TYPE_bias_correction	TRUE
RESULTS_SEARCH_14_PARAMETERS_QUANT_TYPE_keep_extreme_peptides_over_fraction	00:00:00
RESULTS_SEARCH_14_PARAMETERS_QUANT_TYPE_low_confidence_check	TRUE
RESULTS_SEARCH_14_PARAMETERS_QUANT_TYPE_low_intensity_check	TRUE
RESULTS_SEARCH_14_PARAMETERS_QUANT_TYPE_median_statistic	TRUE
RESULTS_SEARCH_14_PARAMETERS_QUANT_TYPE_mod_check	TRUE
RESULTS_SEARCH_14_PARAMETERS_QUANT_TYPE_quant_threshold	-1
RESULTS_SEARCH_14_PARAMETERS_QUANT_TYPE_quant_threshold_sn	9
RESULTS_SEARCH_14_PARAMETERS_QUANT_TYPE_separate_searches	FALSE
RESULTS_SEARCH_14_PARAMETERS_QUANT_TYPE_shared_msms_check	TRUE
RESULTS_SEARCH_14_PARAMETERS_PARAGON_METHOD_SETTINGS_UI_SAMPLE_TYPE	Identification
RESULTS_SEARCH_14_PARAMETERS_PARAGON_METHOD_SETTINGS_UI_CYS_ALKYLATION	Iodoacetamide w other Cys mods possible
RESULTS_SEARCH_14_PARAMETERS_PARAGON_METHOD_SETTINGS_UI_DIGESTION	Trypsin + Lys C
RESULTS_SEARCH_14_PARAMETERS_PARAGON_METHOD_SETTINGS_UI_SPECIAL_FACTOR	Gel-based ID
RESULTS_SEARCH_14_PARAMETERS_PARAGON_METHOD_SETTINGS_UI_INSTRUMENT	TripleTOF 6600
RESULTS_SEARCH_14_PARAMETERS_PARAGON_METHOD_SETTINGS_UI_SEARCH_EFFORT	Thorough
RESULTS_SEARCH_14_PARAMETERS_PARAGON_METHOD_SETTINGS_UI_USER_NAME	IMB-MASS02\massuser
RESULTS_SEARCH_14_PARAMETERS_PARAGON_METHOD_SETTINGS_UI_MACHINE_NAME	IMB-MASS02
RESULTS_SEARCH_14_PARAMETERS_PARAGON_METHOD_SETTINGS_UI_SEARCH_ID	6.37467e+17
RESULTS_SEARCH_14_PARAMETERS_PARAGON_METHOD_SETTINGS_UI_START_TIME	2021-01-19 16:07:13
RESULTS_SEARCH_14_PARAMETERS_PARAGON_METHOD_SETTINGS_UI_MIN_UNUSED_PROTSCORE	0.0458
RESULTS_SEARCH_14_PARAMETERS_PARAGON_METHOD_SETTINGS_UI_PSPEP	TRUE
RESULTS_SEARCH_15_time_cpu	235109
RESULTS_SEARCH_15_time_duration	2713-10-22
RESULTS_SEARCH_15_version	5.0.1.4874
RESULTS_SEARCH_15_xml:id	SEARCH:1:637466692301440684_7
RESULTS_SEARCH_15_PARAMETERS_chemical_data_edited	FALSE
RESULTS_SEARCH_15_PARAMETERS_do_multiprecursor_search	TRUE
RESULTS_SEARCH_15_PARAMETERS_do_reverse_search	TRUE
RESULTS_SEARCH_15_PARAMETERS_max_quant_labels	35
RESULTS_SEARCH_15_PARAMETERS_maxresults	15
RESULTS_SEARCH_15_PARAMETERS_separate_searches	FALSE
RESULTS_SEARCH_15_PARAMETERS_MSTOLERANCE_type	dalton
RESULTS_SEARCH_15_PARAMETERS_MSTOLERANCE_value	0.05
RESULTS_SEARCH_15_PARAMETERS_MSMSTOLERANCE_type	dalton
RESULTS_SEARCH_15_PARAMETERS_MSMSTOLERANCE_value	0.1
RESULTS_SEARCH_15_PARAMETERS_MS_STANDARD_DEVIATION_type	dalton
RESULTS_SEARCH_15_PARAMETERS_MS_STANDARD_DEVIATION_value	0.0011
RESULTS_SEARCH_15_PARAMETERS_MSMS_STANDARD_DEVIATION_type	dalton
RESULTS_SEARCH_15_PARAMETERS_MSMS_STANDARD_DEVIATION_value	0.01
RESULTS_SEARCH_15_PARAMETERS_FASTA_filename	C:\AB SCIEX\ProteinPilot Data\SearchDatabases\uniprot-zebrafish_with_Clover.fasta
RESULTS_SEARCH_15_PARAMETERS_AUTO_CALIBRATION_ms	TRUE
RESULTS_SEARCH_15_PARAMETERS_AUTO_CALIBRATION_msexport	FALSE
RESULTS_SEARCH_15_PARAMETERS_AUTO_CALIBRATION_msms	TRUE
RESULTS_SEARCH_15_PARAMETERS_AUTO_CALIBRATION_msmstolsdratio	2.75
RESULTS_SEARCH_15_PARAMETERS_AUTO_CALIBRATION_mstolsdratio	7
RESULTS_SEARCH_15_PARAMETERS_AUTO_CALIBRATION_squareroot	TRUE
RESULTS_SEARCH_15_PARAMETERS_AUTO_CALIBRATION_type	dalton
RESULTS_SEARCH_15_PARAMETERS_AUTO_CALIBRATION_MCP_d_s_s_f	0.0666667
RESULTS_SEARCH_15_PARAMETERS_AUTO_CALIBRATION_MCP_d_s_w_f	3
RESULTS_SEARCH_15_PARAMETERS_AUTO_CALIBRATION_MCP_m_f_r_mbc	200
RESULTS_SEARCH_15_PARAMETERS_AUTO_CALIBRATION_MCP_m_m_c	10
RESULTS_SEARCH_15_PARAMETERS_AUTO_CALIBRATION_MCP_m_m_f_s	0.25
RESULTS_SEARCH_15_PARAMETERS_AUTO_CALIBRATION_MCP_m_m_p_f	0.33
RESULTS_SEARCH_15_PARAMETERS_AUTO_CALIBRATION_MCP_m_m_p_rms_f	1
RESULTS_SEARCH_15_PARAMETERS_AUTO_CALIBRATION_MCP_m_p_t_f	1
RESULTS_SEARCH_15_PARAMETERS_AUTO_CALIBRATION_MCP_m_r_h_n_b	15
RESULTS_SEARCH_15_PARAMETERS_AUTO_CALIBRATION_MCP_m_z_n_s	99
RESULTS_SEARCH_15_PARAMETERS_AUTO_CALIBRATION_MCP_m_z_s_mn_f_r	0.0666667
RESULTS_SEARCH_15_PARAMETERS_AUTO_CALIBRATION_MCP_m_z_s_mx_f_r	0.1
RESULTS_SEARCH_15_PARAMETERS_MS_AUTO_CALIBRATION_OUT_avres	4.14164e-09
RESULTS_SEARCH_15_PARAMETERS_MS_AUTO_CALIBRATION_OUT_c0	-7.60572e-05
RESULTS_SEARCH_15_PARAMETERS_MS_AUTO_CALIBRATION_OUT_c1minus1	4.4787e-06
RESULTS_SEARCH_15_PARAMETERS_MS_AUTO_CALIBRATION_OUT_c2	0
RESULTS_SEARCH_15_PARAMETERS_MS_AUTO_CALIBRATION_OUT_file	3
RESULTS_SEARCH_15_PARAMETERS_MS_AUTO_CALIBRATION_OUT_partnumber	8
RESULTS_SEARCH_15_PARAMETERS_MS_AUTO_CALIBRATION_OUT_polyorder	1
RESULTS_SEARCH_15_PARAMETERS_MS_AUTO_CALIBRATION_OUT_sample	1
RESULTS_SEARCH_15_PARAMETERS_MS_AUTO_CALIBRATION_OUT_squareroot	TRUE
RESULTS_SEARCH_15_PARAMETERS_MSMS_AUTO_CALIBRATION_OUT_avres	-6.95819e-08
RESULTS_SEARCH_15_PARAMETERS_MSMS_AUTO_CALIBRATION_OUT_c0	-2.65081e-06
RESULTS_SEARCH_15_PARAMETERS_MSMS_AUTO_CALIBRATION_OUT_c1minus1	-3.50829e-07
RESULTS_SEARCH_15_PARAMETERS_MSMS_AUTO_CALIBRATION_OUT_c2	0
RESULTS_SEARCH_15_PARAMETERS_MSMS_AUTO_CALIBRATION_OUT_file	3
RESULTS_SEARCH_15_PARAMETERS_MSMS_AUTO_CALIBRATION_OUT_partnumber	8
RESULTS_SEARCH_15_PARAMETERS_MSMS_AUTO_CALIBRATION_OUT_polyorder	1
RESULTS_SEARCH_15_PARAMETERS_MSMS_AUTO_CALIBRATION_OUT_sample	1
RESULTS_SEARCH_15_PARAMETERS_MSMS_AUTO_CALIBRATION_OUT_squareroot	TRUE
RESULTS_SEARCH_15_PARAMETERS_MAX_PRECURSORS_FRAGLET	5
RESULTS_SEARCH_15_PARAMETERS_MAX_PRECURSORS_TAGLET	1
RESULTS_SEARCH_15_PARAMETERS_PRECURSORS_DR_FRAGLET	10
RESULTS_SEARCH_15_PARAMETERS_PRECURSORS_DR_TAGLET	3
RESULTS_SEARCH_15_PARAMETERS_DEFAULT_CHARGE_STATE_1_charge	2
RESULTS_SEARCH_15_PARAMETERS_DEFAULT_CHARGE_STATE_1_probability	1
RESULTS_SEARCH_15_PARAMETERS_DEFAULT_CHARGE_STATE_2_charge	3
RESULTS_SEARCH_15_PARAMETERS_DEFAULT_CHARGE_STATE_2_probability	1
RESULTS_SEARCH_15_PARAMETERS_DEFAULT_CHARGE_STATE_3_charge	4
RESULTS_SEARCH_15_PARAMETERS_DEFAULT_CHARGE_STATE_3_probability	1
RESULTS_SEARCH_15_PARAMETERS_VERSION	5.0.1.0, 4895
RESULTS_SEARCH_15_PARAMETERS_PARAGON_VERSION	5.0.1.0, 4874
RESULTS_SEARCH_15_PARAMETERS_APPLICATION	ProteinPilot(tm) Software
RESULTS_SEARCH_15_PARAMETERS_PROGROUP_alternativedispositionmaximumfoldprobabilitydrop	100
RESULTS_SEARCH_15_PARAMETERS_PROGROUP_alternativedispositionmaximumfoldscoredrop	2
RESULTS_SEARCH_15_PARAMETERS_PROGROUP_autodiscordantpeptidethreshold	0.3
RESULTS_SEARCH_15_PARAMETERS_PROGROUP_bayesconfidencecalclulation	TRUE
RESULTS_SEARCH_15_PARAMETERS_PROGROUP_calibrateconfidence	TRUE
RESULTS_SEARCH_15_PARAMETERS_PROGROUP_compresspeptides	FALSE
RESULTS_SEARCH_15_PARAMETERS_PROGROUP_confidencepercentthresholdforexcludingothersfromquant	15
RESULTS_SEARCH_15_PARAMETERS_PROGROUP_confidencepercentthresholdforincludingselfinquant	15
RESULTS_SEARCH_15_PARAMETERS_PROGROUP_donotstoremspeaklists	FALSE
RESULTS_SEARCH_15_PARAMETERS_PROGROUP_fasta	C:\AB SCIEX\ProteinPilot Data\SearchDatabases\uniprot-zebrafish_with_Clover.fasta
RESULTS_SEARCH_15_PARAMETERS_PROGROUP_featuregroupminpepconf	0.66
RESULTS_SEARCH_15_PARAMETERS_PROGROUP_featuregroupminups	0.47
RESULTS_SEARCH_15_PARAMETERS_PROGROUP_focusingintersection	4
RESULTS_SEARCH_15_PARAMETERS_PROGROUP_focusingminimummatchconfidence	0.1
RESULTS_SEARCH_15_PARAMETERS_PROGROUP_focusingminunusedprotscore	0.1
RESULTS_SEARCH_15_PARAMETERS_PROGROUP_focusingsubsetcutoff	6
RESULTS_SEARCH_15_PARAMETERS_PROGROUP_intersection	1.3
RESULTS_SEARCH_15_PARAMETERS_PROGROUP_minimummatchconfidencecutoff	0.001
RESULTS_SEARCH_15_PARAMETERS_PROGROUP_minunusedprotscore	0.0458
RESULTS_SEARCH_15_PARAMETERS_PROGROUP_subsetcutoff	2
RESULTS_SEARCH_15_PARAMETERS_PROGROUP_unusedprotscorethresholdforexcludingothersfromquant	1.3
RESULTS_SEARCH_15_PARAMETERS_PEAKLIST_count	3947
RESULTS_SEARCH_15_PARAMETERS_PEAKLIST_filenumber	3
RESULTS_SEARCH_15_PARAMETERS_PEAKLIST_original_count	3947
RESULTS_SEARCH_15_PARAMETERS_PEAKLIST_originalfilename	C:\AB SCIEX\ProteinPilot Data\Results\Albert\ZX 20200429 6600\ZX 20200429 6600 C 3.wiff
RESULTS_SEARCH_15_PARAMETERS_PEAKLIST_partnumber	8
RESULTS_SEARCH_15_PARAMETERS_QUANT_TYPE_background_correction	FALSE
RESULTS_SEARCH_15_PARAMETERS_QUANT_TYPE_bias_correction	TRUE
RESULTS_SEARCH_15_PARAMETERS_QUANT_TYPE_keep_extreme_peptides_over_fraction	0
RESULTS_SEARCH_15_PARAMETERS_QUANT_TYPE_low_confidence_check	TRUE
RESULTS_SEARCH_15_PARAMETERS_QUANT_TYPE_low_intensity_check	TRUE
RESULTS_SEARCH_15_PARAMETERS_QUANT_TYPE_median_statistic	TRUE
RESULTS_SEARCH_15_PARAMETERS_QUANT_TYPE_mod_check	TRUE
RESULTS_SEARCH_15_PARAMETERS_QUANT_TYPE_quant_threshold	-1
RESULTS_SEARCH_15_PARAMETERS_QUANT_TYPE_quant_threshold_sn	9
RESULTS_SEARCH_15_PARAMETERS_QUANT_TYPE_separate_searches	FALSE
RESULTS_SEARCH_15_PARAMETERS_QUANT_TYPE_shared_msms_check	TRUE
RESULTS_SEARCH_15_PARAMETERS_PARAGON_METHOD_SETTINGS_UI_SAMPLE_TYPE	Identification
RESULTS_SEARCH_15_PARAMETERS_PARAGON_METHOD_SETTINGS_UI_CYS_ALKYLATION	Iodoacetamide w other Cys mods possible
RESULTS_SEARCH_15_PARAMETERS_PARAGON_METHOD_SETTINGS_UI_DIGESTION	Trypsin + Lys C
RESULTS_SEARCH_15_PARAMETERS_PARAGON_METHOD_SETTINGS_UI_SPECIAL_FACTOR	Gel-based ID
RESULTS_SEARCH_15_PARAMETERS_PARAGON_METHOD_SETTINGS_UI_INSTRUMENT	TripleTOF 6600
RESULTS_SEARCH_15_PARAMETERS_PARAGON_METHOD_SETTINGS_UI_SEARCH_EFFORT	Thorough
RESULTS_SEARCH_15_PARAMETERS_PARAGON_METHOD_SETTINGS_UI_USER_NAME	IMB-MASS02\massuser
RESULTS_SEARCH_15_PARAMETERS_PARAGON_METHOD_SETTINGS_UI_MACHINE_NAME	IMB-MASS02
RESULTS_SEARCH_15_PARAMETERS_PARAGON_METHOD_SETTINGS_UI_SEARCH_ID	6.37467e+17
RESULTS_SEARCH_15_PARAMETERS_PARAGON_METHOD_SETTINGS_UI_START_TIME	2021-01-19 16:07:13
RESULTS_SEARCH_15_PARAMETERS_PARAGON_METHOD_SETTINGS_UI_MIN_UNUSED_PROTSCORE	0.0458
RESULTS_SEARCH_15_PARAMETERS_PARAGON_METHOD_SETTINGS_UI_PSPEP	TRUE
RESULTS_SEARCH_16_time_cpu	236419
RESULTS_SEARCH_16_time_duration	257581
RESULTS_SEARCH_16_version	5.0.1.4874
RESULTS_SEARCH_16_xml:id	SEARCH:2:637466692301440684_7
RESULTS_SEARCH_16_PARAMETERS_chemical_data_edited	FALSE
RESULTS_SEARCH_16_PARAMETERS_do_multiprecursor_search	TRUE
RESULTS_SEARCH_16_PARAMETERS_do_reverse_search	TRUE
RESULTS_SEARCH_16_PARAMETERS_max_quant_labels	35
RESULTS_SEARCH_16_PARAMETERS_maxresults	15
RESULTS_SEARCH_16_PARAMETERS_separate_searches	FALSE
RESULTS_SEARCH_16_PARAMETERS_MSTOLERANCE_type	dalton
RESULTS_SEARCH_16_PARAMETERS_MSTOLERANCE_value	0.05
RESULTS_SEARCH_16_PARAMETERS_MSMSTOLERANCE_type	dalton
RESULTS_SEARCH_16_PARAMETERS_MSMSTOLERANCE_value	0.1
RESULTS_SEARCH_16_PARAMETERS_MS_STANDARD_DEVIATION_type	dalton
RESULTS_SEARCH_16_PARAMETERS_MS_STANDARD_DEVIATION_value	0.0011
RESULTS_SEARCH_16_PARAMETERS_MSMS_STANDARD_DEVIATION_type	dalton
RESULTS_SEARCH_16_PARAMETERS_MSMS_STANDARD_DEVIATION_value	0.01
RESULTS_SEARCH_16_PARAMETERS_FASTA_filename	C:\AB SCIEX\ProteinPilot Data\SearchDatabases\uniprot-zebrafish_with_Clover.fasta
RESULTS_SEARCH_16_PARAMETERS_AUTO_CALIBRATION_ms	TRUE
RESULTS_SEARCH_16_PARAMETERS_AUTO_CALIBRATION_msexport	FALSE
RESULTS_SEARCH_16_PARAMETERS_AUTO_CALIBRATION_msms	TRUE
RESULTS_SEARCH_16_PARAMETERS_AUTO_CALIBRATION_msmstolsdratio	2.75
RESULTS_SEARCH_16_PARAMETERS_AUTO_CALIBRATION_mstolsdratio	7
RESULTS_SEARCH_16_PARAMETERS_AUTO_CALIBRATION_squareroot	TRUE
RESULTS_SEARCH_16_PARAMETERS_AUTO_CALIBRATION_type	dalton
RESULTS_SEARCH_16_PARAMETERS_AUTO_CALIBRATION_MCP_d_s_s_f	0.0666667
RESULTS_SEARCH_16_PARAMETERS_AUTO_CALIBRATION_MCP_d_s_w_f	3
RESULTS_SEARCH_16_PARAMETERS_AUTO_CALIBRATION_MCP_m_f_r_mbc	200
RESULTS_SEARCH_16_PARAMETERS_AUTO_CALIBRATION_MCP_m_m_c	10
RESULTS_SEARCH_16_PARAMETERS_AUTO_CALIBRATION_MCP_m_m_f_s	0.25
RESULTS_SEARCH_16_PARAMETERS_AUTO_CALIBRATION_MCP_m_m_p_f	0.33
RESULTS_SEARCH_16_PARAMETERS_AUTO_CALIBRATION_MCP_m_m_p_rms_f	1
RESULTS_SEARCH_16_PARAMETERS_AUTO_CALIBRATION_MCP_m_p_t_f	1
RESULTS_SEARCH_16_PARAMETERS_AUTO_CALIBRATION_MCP_m_r_h_n_b	15
RESULTS_SEARCH_16_PARAMETERS_AUTO_CALIBRATION_MCP_m_z_n_s	99
RESULTS_SEARCH_16_PARAMETERS_AUTO_CALIBRATION_MCP_m_z_s_mn_f_r	0.0666667
RESULTS_SEARCH_16_PARAMETERS_AUTO_CALIBRATION_MCP_m_z_s_mx_f_r	0.1
RESULTS_SEARCH_16_PARAMETERS_MS_AUTO_CALIBRATION_OUT_avres	4.14164e-09
RESULTS_SEARCH_16_PARAMETERS_MS_AUTO_CALIBRATION_OUT_c0	-7.60572e-05
RESULTS_SEARCH_16_PARAMETERS_MS_AUTO_CALIBRATION_OUT_c1minus1	4.4787e-06
RESULTS_SEARCH_16_PARAMETERS_MS_AUTO_CALIBRATION_OUT_c2	0
RESULTS_SEARCH_16_PARAMETERS_MS_AUTO_CALIBRATION_OUT_file	3
RESULTS_SEARCH_16_PARAMETERS_MS_AUTO_CALIBRATION_OUT_partnumber	8
RESULTS_SEARCH_16_PARAMETERS_MS_AUTO_CALIBRATION_OUT_polyorder	1
RESULTS_SEARCH_16_PARAMETERS_MS_AUTO_CALIBRATION_OUT_sample	1
RESULTS_SEARCH_16_PARAMETERS_MS_AUTO_CALIBRATION_OUT_squareroot	TRUE
RESULTS_SEARCH_16_PARAMETERS_MSMS_AUTO_CALIBRATION_OUT_avres	-6.95819e-08
RESULTS_SEARCH_16_PARAMETERS_MSMS_AUTO_CALIBRATION_OUT_c0	-2.65081e-06
RESULTS_SEARCH_16_PARAMETERS_MSMS_AUTO_CALIBRATION_OUT_c1minus1	-3.50829e-07
RESULTS_SEARCH_16_PARAMETERS_MSMS_AUTO_CALIBRATION_OUT_c2	0
RESULTS_SEARCH_16_PARAMETERS_MSMS_AUTO_CALIBRATION_OUT_file	3
RESULTS_SEARCH_16_PARAMETERS_MSMS_AUTO_CALIBRATION_OUT_partnumber	8
RESULTS_SEARCH_16_PARAMETERS_MSMS_AUTO_CALIBRATION_OUT_polyorder	1
RESULTS_SEARCH_16_PARAMETERS_MSMS_AUTO_CALIBRATION_OUT_sample	1
RESULTS_SEARCH_16_PARAMETERS_MSMS_AUTO_CALIBRATION_OUT_squareroot	TRUE
RESULTS_SEARCH_16_PARAMETERS_MAX_PRECURSORS_FRAGLET	5
RESULTS_SEARCH_16_PARAMETERS_MAX_PRECURSORS_TAGLET	1
RESULTS_SEARCH_16_PARAMETERS_PRECURSORS_DR_FRAGLET	1900-01-10
RESULTS_SEARCH_16_PARAMETERS_PRECURSORS_DR_TAGLET	1900-01-03
RESULTS_SEARCH_16_PARAMETERS_DEFAULT_CHARGE_STATE_1_charge	2
RESULTS_SEARCH_16_PARAMETERS_DEFAULT_CHARGE_STATE_1_probability	1
RESULTS_SEARCH_16_PARAMETERS_DEFAULT_CHARGE_STATE_2_charge	3
RESULTS_SEARCH_16_PARAMETERS_DEFAULT_CHARGE_STATE_2_probability	1
RESULTS_SEARCH_16_PARAMETERS_DEFAULT_CHARGE_STATE_3_charge	4
RESULTS_SEARCH_16_PARAMETERS_DEFAULT_CHARGE_STATE_3_probability	1
RESULTS_SEARCH_16_PARAMETERS_VERSION	5.0.1.0, 4895
RESULTS_SEARCH_16_PARAMETERS_PARAGON_VERSION	5.0.1.0, 4874
RESULTS_SEARCH_16_PARAMETERS_APPLICATION	ProteinPilot(tm) Software
RESULTS_SEARCH_16_PARAMETERS_PROGROUP_alternativedispositionmaximumfoldprobabilitydrop	100
RESULTS_SEARCH_16_PARAMETERS_PROGROUP_alternativedispositionmaximumfoldscoredrop	2
RESULTS_SEARCH_16_PARAMETERS_PROGROUP_autodiscordantpeptidethreshold	0.3
RESULTS_SEARCH_16_PARAMETERS_PROGROUP_bayesconfidencecalclulation	TRUE
RESULTS_SEARCH_16_PARAMETERS_PROGROUP_calibrateconfidence	TRUE
RESULTS_SEARCH_16_PARAMETERS_PROGROUP_compresspeptides	FALSE
RESULTS_SEARCH_16_PARAMETERS_PROGROUP_confidencepercentthresholdforexcludingothersfromquant	15
RESULTS_SEARCH_16_PARAMETERS_PROGROUP_confidencepercentthresholdforincludingselfinquant	15
RESULTS_SEARCH_16_PARAMETERS_PROGROUP_donotstoremspeaklists	FALSE
RESULTS_SEARCH_16_PARAMETERS_PROGROUP_fasta	C:\AB SCIEX\ProteinPilot Data\SearchDatabases\uniprot-zebrafish_with_Clover.fasta
RESULTS_SEARCH_16_PARAMETERS_PROGROUP_featuregroupminpepconf	0.66
RESULTS_SEARCH_16_PARAMETERS_PROGROUP_featuregroupminups	0.47
RESULTS_SEARCH_16_PARAMETERS_PROGROUP_focusingintersection	4
RESULTS_SEARCH_16_PARAMETERS_PROGROUP_focusingminimummatchconfidence	0.1
RESULTS_SEARCH_16_PARAMETERS_PROGROUP_focusingminunusedprotscore	0.1
RESULTS_SEARCH_16_PARAMETERS_PROGROUP_focusingsubsetcutoff	6
RESULTS_SEARCH_16_PARAMETERS_PROGROUP_intersection	1.3
RESULTS_SEARCH_16_PARAMETERS_PROGROUP_minimummatchconfidencecutoff	0.001
RESULTS_SEARCH_16_PARAMETERS_PROGROUP_minunusedprotscore	0.0458
RESULTS_SEARCH_16_PARAMETERS_PROGROUP_subsetcutoff	2
RESULTS_SEARCH_16_PARAMETERS_PROGROUP_unusedprotscorethresholdforexcludingothersfromquant	1.3
RESULTS_SEARCH_16_PARAMETERS_PEAKLIST_count	3947
RESULTS_SEARCH_16_PARAMETERS_PEAKLIST_filenumber	3
RESULTS_SEARCH_16_PARAMETERS_PEAKLIST_original_count	3947
RESULTS_SEARCH_16_PARAMETERS_PEAKLIST_originalfilename	C:\AB SCIEX\ProteinPilot Data\Results\Albert\ZX 20200429 6600\ZX 20200429 6600 C 3.wiff
RESULTS_SEARCH_16_PARAMETERS_PEAKLIST_partnumber	8
RESULTS_SEARCH_16_PARAMETERS_QUANT_TYPE_background_correction	FALSE
RESULTS_SEARCH_16_PARAMETERS_QUANT_TYPE_bias_correction	TRUE
RESULTS_SEARCH_16_PARAMETERS_QUANT_TYPE_keep_extreme_peptides_over_fraction	0
RESULTS_SEARCH_16_PARAMETERS_QUANT_TYPE_low_confidence_check	TRUE
RESULTS_SEARCH_16_PARAMETERS_QUANT_TYPE_low_intensity_check	TRUE
RESULTS_SEARCH_16_PARAMETERS_QUANT_TYPE_median_statistic	TRUE
RESULTS_SEARCH_16_PARAMETERS_QUANT_TYPE_mod_check	TRUE
RESULTS_SEARCH_16_PARAMETERS_QUANT_TYPE_quant_threshold	-1
RESULTS_SEARCH_16_PARAMETERS_QUANT_TYPE_quant_threshold_sn	9
RESULTS_SEARCH_16_PARAMETERS_QUANT_TYPE_separate_searches	FALSE
RESULTS_SEARCH_16_PARAMETERS_QUANT_TYPE_shared_msms_check	TRUE
RESULTS_SEARCH_16_PARAMETERS_PARAGON_METHOD_SETTINGS_UI_SAMPLE_TYPE	Identification
RESULTS_SEARCH_16_PARAMETERS_PARAGON_METHOD_SETTINGS_UI_CYS_ALKYLATION	Iodoacetamide w other Cys mods possible
RESULTS_SEARCH_16_PARAMETERS_PARAGON_METHOD_SETTINGS_UI_DIGESTION	Trypsin + Lys C
RESULTS_SEARCH_16_PARAMETERS_PARAGON_METHOD_SETTINGS_UI_SPECIAL_FACTOR	Gel-based ID
RESULTS_SEARCH_16_PARAMETERS_PARAGON_METHOD_SETTINGS_UI_INSTRUMENT	TripleTOF 6600
RESULTS_SEARCH_16_PARAMETERS_PARAGON_METHOD_SETTINGS_UI_SEARCH_EFFORT	Thorough
RESULTS_SEARCH_16_PARAMETERS_PARAGON_METHOD_SETTINGS_UI_USER_NAME	IMB-MASS02\massuser
RESULTS_SEARCH_16_PARAMETERS_PARAGON_METHOD_SETTINGS_UI_MACHINE_NAME	IMB-MASS02
RESULTS_SEARCH_16_PARAMETERS_PARAGON_METHOD_SETTINGS_UI_SEARCH_ID	6.37467e+17
RESULTS_SEARCH_16_PARAMETERS_PARAGON_METHOD_SETTINGS_UI_START_TIME	2021-01-19 16:07:13
RESULTS_SEARCH_16_PARAMETERS_PARAGON_METHOD_SETTINGS_UI_MIN_UNUSED_PROTSCORE	0.0458
RESULTS_SEARCH_16_PARAMETERS_PARAGON_METHOD_SETTINGS_UI_PSPEP	TRUE
RESULTS_SEARCH_17_time_cpu	302860
RESULTS_SEARCH_17_time_duration	355943
RESULTS_SEARCH_17_version	5.0.1.4874
RESULTS_SEARCH_17_xml:id	SEARCH:1:637466692301440684_8
RESULTS_SEARCH_17_PARAMETERS_chemical_data_edited	FALSE
RESULTS_SEARCH_17_PARAMETERS_do_multiprecursor_search	TRUE
RESULTS_SEARCH_17_PARAMETERS_do_reverse_search	TRUE
RESULTS_SEARCH_17_PARAMETERS_max_quant_labels	35
RESULTS_SEARCH_17_PARAMETERS_maxresults	15
RESULTS_SEARCH_17_PARAMETERS_separate_searches	FALSE
RESULTS_SEARCH_17_PARAMETERS_MSTOLERANCE_type	dalton
RESULTS_SEARCH_17_PARAMETERS_MSTOLERANCE_value	0.05
RESULTS_SEARCH_17_PARAMETERS_MSMSTOLERANCE_type	dalton
RESULTS_SEARCH_17_PARAMETERS_MSMSTOLERANCE_value	0.1
RESULTS_SEARCH_17_PARAMETERS_MS_STANDARD_DEVIATION_type	dalton
RESULTS_SEARCH_17_PARAMETERS_MS_STANDARD_DEVIATION_value	0.0011
RESULTS_SEARCH_17_PARAMETERS_MSMS_STANDARD_DEVIATION_type	dalton
RESULTS_SEARCH_17_PARAMETERS_MSMS_STANDARD_DEVIATION_value	0.01
RESULTS_SEARCH_17_PARAMETERS_FASTA_filename	C:\AB SCIEX\ProteinPilot Data\SearchDatabases\uniprot-zebrafish_with_Clover.fasta
RESULTS_SEARCH_17_PARAMETERS_AUTO_CALIBRATION_ms	TRUE
RESULTS_SEARCH_17_PARAMETERS_AUTO_CALIBRATION_msexport	FALSE
RESULTS_SEARCH_17_PARAMETERS_AUTO_CALIBRATION_msms	TRUE
RESULTS_SEARCH_17_PARAMETERS_AUTO_CALIBRATION_msmstolsdratio	2.75
RESULTS_SEARCH_17_PARAMETERS_AUTO_CALIBRATION_mstolsdratio	7
RESULTS_SEARCH_17_PARAMETERS_AUTO_CALIBRATION_squareroot	TRUE
RESULTS_SEARCH_17_PARAMETERS_AUTO_CALIBRATION_type	dalton
RESULTS_SEARCH_17_PARAMETERS_AUTO_CALIBRATION_MCP_d_s_s_f	0.0666667
RESULTS_SEARCH_17_PARAMETERS_AUTO_CALIBRATION_MCP_d_s_w_f	3
RESULTS_SEARCH_17_PARAMETERS_AUTO_CALIBRATION_MCP_m_f_r_mbc	200
RESULTS_SEARCH_17_PARAMETERS_AUTO_CALIBRATION_MCP_m_m_c	10
RESULTS_SEARCH_17_PARAMETERS_AUTO_CALIBRATION_MCP_m_m_f_s	0.25
RESULTS_SEARCH_17_PARAMETERS_AUTO_CALIBRATION_MCP_m_m_p_f	0.33
RESULTS_SEARCH_17_PARAMETERS_AUTO_CALIBRATION_MCP_m_m_p_rms_f	1
RESULTS_SEARCH_17_PARAMETERS_AUTO_CALIBRATION_MCP_m_p_t_f	1
RESULTS_SEARCH_17_PARAMETERS_AUTO_CALIBRATION_MCP_m_r_h_n_b	15
RESULTS_SEARCH_17_PARAMETERS_AUTO_CALIBRATION_MCP_m_z_n_s	99
RESULTS_SEARCH_17_PARAMETERS_AUTO_CALIBRATION_MCP_m_z_s_mn_f_r	0.0666667
RESULTS_SEARCH_17_PARAMETERS_AUTO_CALIBRATION_MCP_m_z_s_mx_f_r	0.1
RESULTS_SEARCH_17_PARAMETERS_MS_AUTO_CALIBRATION_OUT_avres	-1.10765e-10
RESULTS_SEARCH_17_PARAMETERS_MS_AUTO_CALIBRATION_OUT_c0	5.51722e-05
RESULTS_SEARCH_17_PARAMETERS_MS_AUTO_CALIBRATION_OUT_c1minus1	-6.63487e-07
RESULTS_SEARCH_17_PARAMETERS_MS_AUTO_CALIBRATION_OUT_c2	0
RESULTS_SEARCH_17_PARAMETERS_MS_AUTO_CALIBRATION_OUT_file	3
RESULTS_SEARCH_17_PARAMETERS_MS_AUTO_CALIBRATION_OUT_partnumber	9
RESULTS_SEARCH_17_PARAMETERS_MS_AUTO_CALIBRATION_OUT_polyorder	1
RESULTS_SEARCH_17_PARAMETERS_MS_AUTO_CALIBRATION_OUT_sample	1900-01-01
RESULTS_SEARCH_17_PARAMETERS_MS_AUTO_CALIBRATION_OUT_squareroot	TRUE
RESULTS_SEARCH_17_PARAMETERS_MSMS_AUTO_CALIBRATION_OUT_avres	-1.55616e-07
RESULTS_SEARCH_17_PARAMETERS_MSMS_AUTO_CALIBRATION_OUT_c0	2.12205e-05
RESULTS_SEARCH_17_PARAMETERS_MSMS_AUTO_CALIBRATION_OUT_c1minus1	-1.72093e-06
RESULTS_SEARCH_17_PARAMETERS_MSMS_AUTO_CALIBRATION_OUT_c2	0
RESULTS_SEARCH_17_PARAMETERS_MSMS_AUTO_CALIBRATION_OUT_file	3
RESULTS_SEARCH_17_PARAMETERS_MSMS_AUTO_CALIBRATION_OUT_partnumber	9
RESULTS_SEARCH_17_PARAMETERS_MSMS_AUTO_CALIBRATION_OUT_polyorder	1
RESULTS_SEARCH_17_PARAMETERS_MSMS_AUTO_CALIBRATION_OUT_sample	1
RESULTS_SEARCH_17_PARAMETERS_MSMS_AUTO_CALIBRATION_OUT_squareroot	TRUE
RESULTS_SEARCH_17_PARAMETERS_MAX_PRECURSORS_FRAGLET	5
RESULTS_SEARCH_17_PARAMETERS_MAX_PRECURSORS_TAGLET	1
RESULTS_SEARCH_17_PARAMETERS_PRECURSORS_DR_FRAGLET	10
RESULTS_SEARCH_17_PARAMETERS_PRECURSORS_DR_TAGLET	3
RESULTS_SEARCH_17_PARAMETERS_DEFAULT_CHARGE_STATE_1_charge	2
RESULTS_SEARCH_17_PARAMETERS_DEFAULT_CHARGE_STATE_1_probability	1
RESULTS_SEARCH_17_PARAMETERS_DEFAULT_CHARGE_STATE_2_charge	3
RESULTS_SEARCH_17_PARAMETERS_DEFAULT_CHARGE_STATE_2_probability	1
RESULTS_SEARCH_17_PARAMETERS_DEFAULT_CHARGE_STATE_3_charge	4
RESULTS_SEARCH_17_PARAMETERS_DEFAULT_CHARGE_STATE_3_probability	1
RESULTS_SEARCH_17_PARAMETERS_VERSION	5.0.1.0, 4895
RESULTS_SEARCH_17_PARAMETERS_PARAGON_VERSION	5.0.1.0, 4874
RESULTS_SEARCH_17_PARAMETERS_APPLICATION	ProteinPilot(tm) Software
RESULTS_SEARCH_17_PARAMETERS_PROGROUP_alternativedispositionmaximumfoldprobabilitydrop	100
RESULTS_SEARCH_17_PARAMETERS_PROGROUP_alternativedispositionmaximumfoldscoredrop	2
RESULTS_SEARCH_17_PARAMETERS_PROGROUP_autodiscordantpeptidethreshold	0.3
[truncated: 8,172 more rows]

## Sheet: Metadata Calculations
	Subsearch	Search string	present		File index down	Part number	Spectra - 'original'	Spectra 'count' - non-empty?	max original Spectra for part	Max non-empty spectra for part	File Index for first only
	1	RESULTS_SEARCH_1_PARAMETERS_PEAKLIST_rawdatafilename		C:\AB SCIEX\ProteinPilot Data\Results\Albert\ZX 20200429 6600\ZX 20200429 6600 C 1.wiff	1	1	2882	2882	2882	2882	1
	2	RESULTS_SEARCH_2_PARAMETERS_PEAKLIST_rawdatafilename		C:\AB SCIEX\ProteinPilot Data\Results\Albert\ZX 20200429 6600\ZX 20200429 6600 C 1.wiff	1	1	2882	2882
	3	RESULTS_SEARCH_3_PARAMETERS_PEAKLIST_rawdatafilename		C:\AB SCIEX\ProteinPilot Data\Results\Albert\ZX 20200429 6600\ZX 20200429 6600 C 1.wiff	1	2	2867	2867	2867	2867
1 if Rapid, 2 if Thor	4	RESULTS_SEARCH_4_PARAMETERS_PEAKLIST_rawdatafilename		C:\AB SCIEX\ProteinPilot Data\Results\Albert\ZX 20200429 6600\ZX 20200429 6600 C 1.wiff	1	2	2867	2867
2	5	RESULTS_SEARCH_5_PARAMETERS_PEAKLIST_rawdatafilename		C:\AB SCIEX\ProteinPilot Data\Results\Albert\ZX 20200429 6600\ZX 20200429 6600 C 1.wiff	1	3	2869	2869	2869	2869
	6	RESULTS_SEARCH_6_PARAMETERS_PEAKLIST_rawdatafilename		C:\AB SCIEX\ProteinPilot Data\Results\Albert\ZX 20200429 6600\ZX 20200429 6600 C 1.wiff	1	3	2869	2869
# Segments	7	RESULTS_SEARCH_7_PARAMETERS_PEAKLIST_rawdatafilename		C:\AB SCIEX\ProteinPilot Data\Results\Albert\ZX 20200429 6600\ZX 20200429 6600 C 2.wiff	2	4	3355	3355	3355	3355	2
86	8	RESULTS_SEARCH_8_PARAMETERS_PEAKLIST_rawdatafilename		C:\AB SCIEX\ProteinPilot Data\Results\Albert\ZX 20200429 6600\ZX 20200429 6600 C 2.wiff	2	4	3355	3355
(max is 1000 segments)	9	RESULTS_SEARCH_9_PARAMETERS_PEAKLIST_rawdatafilename		C:\AB SCIEX\ProteinPilot Data\Results\Albert\ZX 20200429 6600\ZX 20200429 6600 C 2.wiff	2	5	3331	3331	3331	3331
	10	RESULTS_SEARCH_10_PARAMETERS_PEAKLIST_rawdatafilename		C:\AB SCIEX\ProteinPilot Data\Results\Albert\ZX 20200429 6600\ZX 20200429 6600 C 2.wiff	2	5	3331	3331
	11	RESULTS_SEARCH_11_PARAMETERS_PEAKLIST_rawdatafilename		C:\AB SCIEX\ProteinPilot Data\Results\Albert\ZX 20200429 6600\ZX 20200429 6600 C 2.wiff	2	6	3321	3321	3321	3321
	12	RESULTS_SEARCH_12_PARAMETERS_PEAKLIST_rawdatafilename		C:\AB SCIEX\ProteinPilot Data\Results\Albert\ZX 20200429 6600\ZX 20200429 6600 C 2.wiff	2	6	3321	3321
	13	RESULTS_SEARCH_13_PARAMETERS_PEAKLIST_rawdatafilename		C:\AB SCIEX\ProteinPilot Data\Results\Albert\ZX 20200429 6600\ZX 20200429 6600 C 3.wiff	3	7	3929	3929	3929	3929	3
	14	RESULTS_SEARCH_14_PARAMETERS_PEAKLIST_rawdatafilename		C:\AB SCIEX\ProteinPilot Data\Results\Albert\ZX 20200429 6600\ZX 20200429 6600 C 3.wiff	3	7	3929	3929
	15	RESULTS_SEARCH_15_PARAMETERS_PEAKLIST_rawdatafilename		C:\AB SCIEX\ProteinPilot Data\Results\Albert\ZX 20200429 6600\ZX 20200429 6600 C 3.wiff	3	8	3947	3947	3947	3947
	16	RESULTS_SEARCH_16_PARAMETERS_PEAKLIST_rawdatafilename		C:\AB SCIEX\ProteinPilot Data\Results\Albert\ZX 20200429 6600\ZX 20200429 6600 C 3.wiff	3	8	3947	3947
	17	RESULTS_SEARCH_17_PARAMETERS_PEAKLIST_rawdatafilename		C:\AB SCIEX\ProteinPilot Data\Results\Albert\ZX 20200429 6600\ZX 20200429 6600 C 3.wiff	3	9	3911	3911	3911	3911
	18	RESULTS_SEARCH_18_PARAMETERS_PEAKLIST_rawdatafilename		C:\AB SCIEX\ProteinPilot Data\Results\Albert\ZX 20200429 6600\ZX 20200429 6600 C 3.wiff	3	9	3911	3911
	19	RESULTS_SEARCH_19_PARAMETERS_PEAKLIST_rawdatafilename		C:\AB SCIEX\ProteinPilot Data\Results\Albert\ZX 20200429 6600\ZX 20200429 6600 C 3.wiff	3	10	3925	3925	3925	3925
	20	RESULTS_SEARCH_20_PARAMETERS_PEAKLIST_rawdatafilename		C:\AB SCIEX\ProteinPilot Data\Results\Albert\ZX 20200429 6600\ZX 20200429 6600 C 3.wiff	3	10	3925	3925
	21	RESULTS_SEARCH_21_PARAMETERS_PEAKLIST_rawdatafilename		C:\AB SCIEX\ProteinPilot Data\Results\Albert\ZX 20200429 6600\ZX 20200429 6600 C 4.wiff	4	11	3493	3493	3493	3493	4
	22	RESULTS_SEARCH_22_PARAMETERS_PEAKLIST_rawdatafilename		C:\AB SCIEX\ProteinPilot Data\Results\Albert\ZX 20200429 6600\ZX 20200429 6600 C 4.wiff	4	11	3493	3493
	23	RESULTS_SEARCH_23_PARAMETERS_PEAKLIST_rawdatafilename		C:\AB SCIEX\ProteinPilot Data\Results\Albert\ZX 20200429 6600\ZX 20200429 6600 C 4.wiff	4	12	3479	3479	3479	3479
	24	RESULTS_SEARCH_24_PARAMETERS_PEAKLIST_rawdatafilename		C:\AB SCIEX\ProteinPilot Data\Results\Albert\ZX 20200429 6600\ZX 20200429 6600 C 4.wiff	4	12	3479	3479
	25	RESULTS_SEARCH_25_PARAMETERS_PEAKLIST_rawdatafilename		C:\AB SCIEX\ProteinPilot Data\Results\Albert\ZX 20200429 6600\ZX 20200429 6600 C 4.wiff	4	13	3468	3468	3468	3468
	26	RESULTS_SEARCH_26_PARAMETERS_PEAKLIST_rawdatafilename		C:\AB SCIEX\ProteinPilot Data\Results\Albert\ZX 20200429 6600\ZX 20200429 6600 C 4.wiff	4	13	3468	3468
	27	RESULTS_SEARCH_27_PARAMETERS_PEAKLIST_rawdatafilename		C:\AB SCIEX\ProteinPilot Data\Results\Albert\ZX 20200429 6600\ZX 20200429 6600 C 4.wiff	4	14	3459	3459	3459	3459
	28	RESULTS_SEARCH_28_PARAMETERS_PEAKLIST_rawdatafilename		C:\AB SCIEX\ProteinPilot Data\Results\Albert\ZX 20200429 6600\ZX 20200429 6600 C 4.wiff	4	14	3459	3459
	29	RESULTS_SEARCH_29_PARAMETERS_PEAKLIST_rawdatafilename		C:\AB SCIEX\ProteinPilot Data\Results\Albert\ZX 20200429 6600\ZX 20200429 6600 C 5.wiff	5	15	3610	3610	3610	3610	5
	30	RESULTS_SEARCH_30_PARAMETERS_PEAKLIST_rawdatafilename		C:\AB SCIEX\ProteinPilot Data\Results\Albert\ZX 20200429 6600\ZX 20200429 6600 C 5.wiff	5	15	3610	3610
	31	RESULTS_SEARCH_31_PARAMETERS_PEAKLIST_rawdatafilename		C:\AB SCIEX\ProteinPilot Data\Results\Albert\ZX 20200429 6600\ZX 20200429 6600 C 5.wiff	5	16	3604	3604	3604	3604
	32	RESULTS_SEARCH_32_PARAMETERS_PEAKLIST_rawdatafilename		C:\AB SCIEX\ProteinPilot Data\Results\Albert\ZX 20200429 6600\ZX 20200429 6600 C 5.wiff	5	16	3604	3604
	33	RESULTS_SEARCH_33_PARAMETERS_PEAKLIST_rawdatafilename		C:\AB SCIEX\ProteinPilot Data\Results\Albert\ZX 20200429 6600\ZX 20200429 6600 C 5.wiff	5	17	3576	3576	3576	3576
	34	RESULTS_SEARCH_34_PARAMETERS_PEAKLIST_rawdatafilename		C:\AB SCIEX\ProteinPilot Data\Results\Albert\ZX 20200429 6600\ZX 20200429 6600 C 5.wiff	5	17	3576	3576
	35	RESULTS_SEARCH_35_PARAMETERS_PEAKLIST_rawdatafilename		C:\AB SCIEX\ProteinPilot Data\Results\Albert\ZX 20200429 6600\ZX 20200429 6600 C 6.wiff	6	18	3293	3293	3293	3293	6
	36	RESULTS_SEARCH_36_PARAMETERS_PEAKLIST_rawdatafilename		C:\AB SCIEX\ProteinPilot Data\Results\Albert\ZX 20200429 6600\ZX 20200429 6600 C 6.wiff	6	18	3293	3293
	37	RESULTS_SEARCH_37_PARAMETERS_PEAKLIST_rawdatafilename		C:\AB SCIEX\ProteinPilot Data\Results\Albert\ZX 20200429 6600\ZX 20200429 6600 C 6.wiff	6	19	3278	3278	3278	3278
	38	RESULTS_SEARCH_38_PARAMETERS_PEAKLIST_rawdatafilename		C:\AB SCIEX\ProteinPilot Data\Results\Albert\ZX 20200429 6600\ZX 20200429 6600 C 6.wiff	6	19	3278	3278
	39	RESULTS_SEARCH_39_PARAMETERS_PEAKLIST_rawdatafilename		C:\AB SCIEX\ProteinPilot Data\Results\Albert\ZX 20200429 6600\ZX 20200429 6600 C 6.wiff	6	20	3278	3278	3278	3278
	40	RESULTS_SEARCH_40_PARAMETERS_PEAKLIST_rawdatafilename		C:\AB SCIEX\ProteinPilot Data\Results\Albert\ZX 20200429 6600\ZX 20200429 6600 C 6.wiff	6	20	3278	3278
	41	RESULTS_SEARCH_41_PARAMETERS_PEAKLIST_rawdatafilename		C:\AB SCIEX\ProteinPilot Data\Results\Albert\ZX 20200429 6600\ZX 20200429 6600 C 6.wiff	6	21	3274	3274	3274	3274
	42	RESULTS_SEARCH_42_PARAMETERS_PEAKLIST_rawdatafilename		C:\AB SCIEX\ProteinPilot Data\Results\Albert\ZX 20200429 6600\ZX 20200429 6600 C 6.wiff	6	21	3274	3274
	43	RESULTS_SEARCH_43_PARAMETERS_PEAKLIST_rawdatafilename		C:\AB SCIEX\ProteinPilot Data\Results\Albert\ZX 20200429 6600\ZX 20200429 6600 C 7.wiff	7	22	3767	3767	3767	3767	7
	44	RESULTS_SEARCH_44_PARAMETERS_PEAKLIST_rawdatafilename		C:\AB SCIEX\ProteinPilot Data\Results\Albert\ZX 20200429 6600\ZX 20200429 6600 C 7.wiff	7	22	3767	3767
	45	RESULTS_SEARCH_45_PARAMETERS_PEAKLIST_rawdatafilename		C:\AB SCIEX\ProteinPilot Data\Results\Albert\ZX 20200429 6600\ZX 20200429 6600 C 7.wiff	7	23	3750	3750	3750	3750
	46	RESULTS_SEARCH_46_PARAMETERS_PEAKLIST_rawdatafilename		C:\AB SCIEX\ProteinPilot Data\Results\Albert\ZX 20200429 6600\ZX 20200429 6600 C 7.wiff	7	23	3750	3750
	47	RESULTS_SEARCH_47_PARAMETERS_PEAKLIST_rawdatafilename		C:\AB SCIEX\ProteinPilot Data\Results\Albert\ZX 20200429 6600\ZX 20200429 6600 C 7.wiff	7	24	3767	3767	3767	3767
	48	RESULTS_SEARCH_48_PARAMETERS_PEAKLIST_rawdatafilename		C:\AB SCIEX\ProteinPilot Data\Results\Albert\ZX 20200429 6600\ZX 20200429 6600 C 7.wiff	7	24	3767	3767
	49	RESULTS_SEARCH_49_PARAMETERS_PEAKLIST_rawdatafilename		C:\AB SCIEX\ProteinPilot Data\Results\Albert\ZX 20200429 6600\ZX 20200429 6600 C 7.wiff	7	25	3726	3726	3726	3726
	50	RESULTS_SEARCH_50_PARAMETERS_PEAKLIST_rawdatafilename		C:\AB SCIEX\ProteinPilot Data\Results\Albert\ZX 20200429 6600\ZX 20200429 6600 C 7.wiff	7	25	3726	3726
	51	RESULTS_SEARCH_51_PARAMETERS_PEAKLIST_rawdatafilename		C:\AB SCIEX\ProteinPilot Data\Results\Albert\ZX 20200429 6600\ZX 20200429 6600 C 8.wiff	8	26	3935	3935	3935	3935	8
	52	RESULTS_SEARCH_52_PARAMETERS_PEAKLIST_rawdatafilename		C:\AB SCIEX\ProteinPilot Data\Results\Albert\ZX 20200429 6600\ZX 20200429 6600 C 8.wiff	8	26	3935	3935
	53	RESULTS_SEARCH_53_PARAMETERS_PEAKLIST_rawdatafilename		C:\AB SCIEX\ProteinPilot Data\Results\Albert\ZX 20200429 6600\ZX 20200429 6600 C 8.wiff	8	27	3916	3916	3916	3916
	54	RESULTS_SEARCH_54_PARAMETERS_PEAKLIST_rawdatafilename		C:\AB SCIEX\ProteinPilot Data\Results\Albert\ZX 20200429 6600\ZX 20200429 6600 C 8.wiff	8	27	3916	3916
	55	RESULTS_SEARCH_55_PARAMETERS_PEAKLIST_rawdatafilename		C:\AB SCIEX\ProteinPilot Data\Results\Albert\ZX 20200429 6600\ZX 20200429 6600 C 9.wiff	9	28	2987	2987	2987	2987	9
	56	RESULTS_SEARCH_56_PARAMETERS_PEAKLIST_rawdatafilename		C:\AB SCIEX\ProteinPilot Data\Results\Albert\ZX 20200429 6600\ZX 20200429 6600 C 9.wiff	9	28	2987	2987
	57	RESULTS_SEARCH_57_PARAMETERS_PEAKLIST_rawdatafilename		C:\AB SCIEX\ProteinPilot Data\Results\Albert\ZX 20200429 6600\ZX 20200429 6600 C 9.wiff	9	29	2996	2996	2996	2996
	58	RESULTS_SEARCH_58_PARAMETERS_PEAKLIST_rawdatafilename		C:\AB SCIEX\ProteinPilot Data\Results\Albert\ZX 20200429 6600\ZX 20200429 6600 C 9.wiff	9	29	2996	2996
	59	RESULTS_SEARCH_59_PARAMETERS_PEAKLIST_rawdatafilename		C:\AB SCIEX\ProteinPilot Data\Results\Albert\ZX 20200429 6600\ZX 20200429 6600 C 9.wiff	9	30	2978	2978	2978	2978
	60	RESULTS_SEARCH_60_PARAMETERS_PEAKLIST_rawdatafilename		C:\AB SCIEX\ProteinPilot Data\Results\Albert\ZX 20200429 6600\ZX 20200429 6600 C 9.wiff	9	30	2978	2978
	61	RESULTS_SEARCH_61_PARAMETERS_PEAKLIST_rawdatafilename		C:\AB SCIEX\ProteinPilot Data\Results\Albert\ZX 20200429 6600\ZX 20200429 6600 C 10.wiff	10	31	2828	2828	2828	2828	10
	62	RESULTS_SEARCH_62_PARAMETERS_PEAKLIST_rawdatafilename		C:\AB SCIEX\ProteinPilot Data\Results\Albert\ZX 20200429 6600\ZX 20200429 6600 C 10.wiff	10	31	2828	2828
	63	RESULTS_SEARCH_63_PARAMETERS_PEAKLIST_rawdatafilename		C:\AB SCIEX\ProteinPilot Data\Results\Albert\ZX 20200429 6600\ZX 20200429 6600 C 10.wiff	10	32	2817	2817	2817	2817
	64	RESULTS_SEARCH_64_PARAMETERS_PEAKLIST_rawdatafilename		C:\AB SCIEX\ProteinPilot Data\Results\Albert\ZX 20200429 6600\ZX 20200429 6600 C 10.wiff	10	32	2817	2817
	65	RESULTS_SEARCH_65_PARAMETERS_PEAKLIST_rawdatafilename		C:\AB SCIEX\ProteinPilot Data\Results\Albert\ZX 20200429 6600\ZX 20200429 6600 C 10.wiff	10	33	2804	2804	2804	2804
	66	RESULTS_SEARCH_66_PARAMETERS_PEAKLIST_rawdatafilename		C:\AB SCIEX\ProteinPilot Data\Results\Albert\ZX 20200429 6600\ZX 20200429 6600 C 10.wiff	10	33	2804	2804
	67	RESULTS_SEARCH_67_PARAMETERS_PEAKLIST_rawdatafilename		C:\AB SCIEX\ProteinPilot Data\Results\Albert\ZX 20200429 6600\ZX 20200429 6600 C 11.wiff	11	34	3645	3645	3645	3645	11
	68	RESULTS_SEARCH_68_PARAMETERS_PEAKLIST_rawdatafilename		C:\AB SCIEX\ProteinPilot Data\Results\Albert\ZX 20200429 6600\ZX 20200429 6600 C 11.wiff	11	34	3645	3645
	69	RESULTS_SEARCH_69_PARAMETERS_PEAKLIST_rawdatafilename		C:\AB SCIEX\ProteinPilot Data\Results\Albert\ZX 20200429 6600\ZX 20200429 6600 C 11.wiff	11	35	3594	3594	3594	3594
	70	RESULTS_SEARCH_70_PARAMETERS_PEAKLIST_rawdatafilename		C:\AB SCIEX\ProteinPilot Data\Results\Albert\ZX 20200429 6600\ZX 20200429 6600 C 11.wiff	11	35	3594	3594
	71	RESULTS_SEARCH_71_PARAMETERS_PEAKLIST_rawdatafilename		C:\AB SCIEX\ProteinPilot Data\Results\Albert\ZX 20200429 6600\ZX 20200429 6600 C 11.wiff	11	36	3608	3608	3608	3608
	72	RESULTS_SEARCH_72_PARAMETERS_PEAKLIST_rawdatafilename		C:\AB SCIEX\ProteinPilot Data\Results\Albert\ZX 20200429 6600\ZX 20200429 6600 C 11.wiff	11	36	3608	3608
	73	RESULTS_SEARCH_73_PARAMETERS_PEAKLIST_rawdatafilename		C:\AB SCIEX\ProteinPilot Data\Results\Albert\ZX 20200429 6600\ZX 20200429 6600 C 12.wiff	12	37	3617	3617	3617	3617	12
	74	RESULTS_SEARCH_74_PARAMETERS_PEAKLIST_rawdatafilename		C:\AB SCIEX\ProteinPilot Data\Results\Albert\ZX 20200429 6600\ZX 20200429 6600 C 12.wiff	12	37	3617	3617
	75	RESULTS_SEARCH_75_PARAMETERS_PEAKLIST_rawdatafilename		C:\AB SCIEX\ProteinPilot Data\Results\Albert\ZX 20200429 6600\ZX 20200429 6600 C 12.wiff	12	38	3593	3593	3593	3593
	76	RESULTS_SEARCH_76_PARAMETERS_PEAKLIST_rawdatafilename		C:\AB SCIEX\ProteinPilot Data\Results\Albert\ZX 20200429 6600\ZX 20200429 6600 C 12.wiff	12	38	3593	3593
	77	RESULTS_SEARCH_77_PARAMETERS_PEAKLIST_rawdatafilename		C:\AB SCIEX\ProteinPilot Data\Results\Albert\ZX 20200429 6600\ZX 20200429 6600 C 12.wiff	12	39	3604	3604	3604	3604
	78	RESULTS_SEARCH_78_PARAMETERS_PEAKLIST_rawdatafilename		C:\AB SCIEX\ProteinPilot Data\Results\Albert\ZX 20200429 6600\ZX 20200429 6600 C 12.wiff	12	39	3604	3604
	79	RESULTS_SEARCH_79_PARAMETERS_PEAKLIST_rawdatafilename		C:\AB SCIEX\ProteinPilot Data\Results\Albert\ZX 20200429 6600\ZX 20200429 6600 C 13.wiff	13	40	3351	3351	3351	3351	13
	80	RESULTS_SEARCH_80_PARAMETERS_PEAKLIST_rawdatafilename		C:\AB SCIEX\ProteinPilot Data\Results\Albert\ZX 20200429 6600\ZX 20200429 6600 C 13.wiff	13	40	3351	3351
	81	RESULTS_SEARCH_81_PARAMETERS_PEAKLIST_rawdatafilename		C:\AB SCIEX\ProteinPilot Data\Results\Albert\ZX 20200429 6600\ZX 20200429 6600 C 13.wiff	13	41	3355	3355	3355	3355
	82	RESULTS_SEARCH_82_PARAMETERS_PEAKLIST_rawdatafilename		C:\AB SCIEX\ProteinPilot Data\Results\Albert\ZX 20200429 6600\ZX 20200429 6600 C 13.wiff	13	41	3355	3355
	83	RESULTS_SEARCH_83_PARAMETERS_PEAKLIST_rawdatafilename		C:\AB SCIEX\ProteinPilot Data\Results\Albert\ZX 20200429 6600\ZX 20200429 6600 C 13.wiff	13	42	3322	3322	3322	3322
	84	RESULTS_SEARCH_84_PARAMETERS_PEAKLIST_rawdatafilename		C:\AB SCIEX\ProteinPilot Data\Results\Albert\ZX 20200429 6600\ZX 20200429 6600 C 13.wiff	13	42	3322	3322
	85	RESULTS_SEARCH_85_PARAMETERS_PEAKLIST_rawdatafilename		C:\AB SCIEX\ProteinPilot Data\Results\Albert\ZX 20200429 6600\ZX 20200429 6600 C 13.wiff	13	43	3337	3337	3337	3337
	86	RESULTS_SEARCH_86_PARAMETERS_PEAKLIST_rawdatafilename		C:\AB SCIEX\ProteinPilot Data\Results\Albert\ZX 20200429 6600\ZX 20200429 6600 C 13.wiff	13	43	3337	3337

## Sheet: Curated Metadata
Group file metadata term	Metadata Description (of raw extracted item)	Use Partial Match	Term in Stream	Derived (Calculated)	Value	Validation check/comments	Conversion type, if done	Conversion factor		Metadata Category	Metadata Description of Final Metadata Item (converted manually, if applicable)	Value
	Group filename			1						Attributes - General	Group filename	Source_File_1_Cavin1a_control.group
RESULTS_SEARCH_1_PARAMETERS_PARAGON_METHOD_SETTINGS_UI_START_TIME	Start date		1		2021-01-19 16:07:13					Attributes - General	Start date	2021-01-19 16:07:13
RESULTS_SEARCH_STAT_search_begin_time_clock	Start time		1		01/19/2021 16:07:13					Attributes - General	Start time	01/19/2021 16:07:13
RESULTS_SEARCH_1_PARAMETERS_PARAGON_METHOD_SETTINGS_UI_USER_NAME	User name		1		IMB-MASS02\massuser					Attributes - General	User name	IMB-MASS02\massuser
RESULTS_SEARCH_1_xml:id	Internal search identifier number		1	1						Attributes - General	Internal search identifier number
PARAMETERS_PEAKLIST_original_count				1						Attributes - Input data	Number of spectra in search	147446
PARAMETERS_PEAKLIST_count				1						Attributes - Input data	Number of non-empty spectra in search	147446
PARAMETERS_PEAKLIST_filenumber	Number of input files	1	1	1	13					Attributes - Input data	Number of input files	13
RESULTS_SEARCH_1_PARAMETERS_PARAGON_METHOD_SETTINGS_UI_SAMPLE_TYPE	Sample Type		1		Identification					Parameters - User settings	Sample Type	Identification
RESULTS_SEARCH_1_PARAMETERS_PARAGON_METHOD_SETTINGS_UI_CYS_ALKYLATION	Cysteine Alkylation		1		Iodoacetamide w other Cys mods possible					Parameters - User settings	Cysteine Alkylation	Iodoacetamide w other Cys mods possible
RESULTS_SEARCH_1_PARAMETERS_PARAGON_METHOD_SETTINGS_UI_DIGESTION	Digestion		1		Trypsin + Lys C					Parameters - User settings	Digestion	Trypsin + Lys C
RESULTS_SEARCH_1_PARAMETERS_PARAGON_METHOD_SETTINGS_UI_SPECIAL_FACTOR	Special Factors		1		Gel-based ID					Parameters - User settings	Special Factors	Gel-based ID
RESULTS_SEARCH_1_PARAMETERS_PARAGON_METHOD_SETTINGS_UI_INSTRUMENT	Instrument		1		TripleTOF 6600					Parameters - User settings	Instrument	TripleTOF 6600
RESULTS_SEARCH_1_PARAMETERS_PARAGON_METHOD_SETTINGS_UI_SPECIES	Species									Parameters - User settings	Species
RESULTS_SEARCH_1_PARAMETERS_PARAGON_METHOD_SETTINGS_UI_SEARCH_EFFORT	Search Effort		1		Thorough					Parameters - User settings	Search Effort	Thorough
RESULTS_SEARCH_1_PARAMETERS_PARAGON_METHOD_SETTINGS_UI_ID_FOCUS	ID Focus									Parameters - User settings	ID Focus
RESULTS_SEARCH_1_PARAMETERS_PARAGON_METHOD_SETTINGS_UI_MIN_UNUSED_PROTSCORE	Minimum Unused ProtScore		1		0.0458					Parameters - User settings	Minimum Unused ProtScore	0.0458
RESULTS_SEARCH_1_PARAMETERS_PARAGON_METHOD_SETTINGS_UI_PSPEP	FDR Analysis		1		TRUE		Logical to English			Parameters - User settings	FDR Analysis	Yes
	Quantitation						Logical to English			Parameters - User settings	Quantitation
RESULTS_SEARCH_1_PARAMETERS_QUANT_TYPE_background_correction	Background Correction		1		FALSE		Logical to English			Parameters - User settings	Background Correction	No
RESULTS_SEARCH_1_PARAMETERS_QUANT_TYPE_bias_correction	Bias Correction		1		TRUE		Logical to English			Parameters - User settings	Bias Correction	Yes
	Channel to use as denominator in ratios									Parameters - User settings	Channel to use as denominator in ratios
RESULTS_SEARCH_1_PARAMETERS_chemical_data_edited	Modified Data Dictionary or Parameter Translation		1		FALSE		Logical to English			Parameters - User settings	Modified Data Dictionary or Parameter Translation	No
RESULTS_SEARCH_1_PARAMETERS_FASTA_filename	Database filename		1		C:\AB SCIEX\ProteinPilot Data\SearchDatabases\uniprot-zebrafish_with_Clover.fasta					Attributes - Search database	Database filename	C:\AB SCIEX\ProteinPilot Data\SearchDatabases\uniprot-zebrafish_with_Clover.fasta
				1						Attributes - Search database	Number of Proteins in Database	75212
RESULTS_SEARCH_STAT_num_proteins	Number of proteins searched		1		150424					Attributes - Search database	Number of proteins searched	150424
				1						Attributes - Search database	Number of Residues in Database	37854281
RESULTS_SEARCH_STAT_num_residues	Number of residues searched		1		75708562					Attributes - Search database	Number of residues searched	75708562
RESULTS_SEARCH_STAT_computer_memory	RAM (MB)		1		32767					Attributes - Hardware	RAM (MB)	32767
RESULTS_SEARCH_STAT_computer_name	Computer name		1		IMB-MASS02					Attributes - Hardware	Computer name	IMB-MASS02
RESULTS_SEARCH_STAT_number_cores	Number of cores in computer		1		8					Attributes - Hardware	Number of cores in computer	8
RESULTS_SEARCH_STAT_number_processors	Number of threads (double cores if hyperthreading on)		1		8					Attributes - Hardware	Number of threads (double cores if hyperthreading on)	8
RESULTS_SEARCH_STAT_number_licensed_tasks	Number of cores licensed to use		1		16					Attributes - Software environment	Number of cores licensed to use	16
RESULTS_SEARCH_STAT_os	Operating system		1		Windows Server 2008 R2 Standard (6.1.7600)					Attributes - Software environment	Operating system	Windows Server 2008 R2 Standard (6.1.7600)
RESULTS_SEARCH_1_PARAMETERS_VERSION	ProteinPilot Software Version		1		5.0.1.0, 4895					Attributes - Software environment	ProteinPilot Software Version	5.0.1.0, 4895
RESULTS_SEARCH_1_PARAMETERS_PARAGON_VERSION	Paragon Algorithm Version		1		5.0.1.0, 4874					Attributes - Software environment	Paragon Algorithm Version	5.0.1.0, 4874
RESULTS_SEARCH_1_PARAMETERS_APPLICATION	Application name		1		ProteinPilot(tm) Software					Attributes - Software environment	Application name	ProteinPilot(tm) Software
RESULTS_GROUPRESULTSUMMARY_1_confidence	Confidence of first row in summary statistics ID statistics		1		0.99		Fraction to %	100		Statistics - Protein Summary Table	Percent Confidence of first row in Summary Statistics ID Statistics	99
RESULTS_GROUPRESULTSUMMARY_1_distinctpeptides	Distinct peptides associated with 99% confidence proteins		1		1810					Statistics - Protein Summary Table	Distinct peptides associated with 99% confidence proteins	1810
RESULTS_GROUPRESULTSUMMARY_1_proteinsbeforegroupping	Proteins before grouping (99% confidence)		1		365					Statistics - Protein Summary Table	Proteins before grouping (99% confidence)	365
RESULTS_GROUPRESULTSUMMARY_1_proteinsidentified	Proteins detected (99% confidence)		1		54					Statistics - Protein Summary Table	Proteins detected (99% confidence)	54
RESULTS_GROUPRESULTSUMMARY_1_spectraidentified	Spectra associated with 99% confidence proteins		1		35741					Statistics - Protein Summary Table	Spectra associated with 99% confidence proteins	35741
RESULTS_GROUPRESULTSUMMARY_2_confidence	Confidence of second row in Summary Statistics ID statistics		1		0.95		Fraction to %	100		Statistics - Protein Summary Table	Percent Confidence of first row in Summary Statistics ID Statistics	95
RESULTS_GROUPRESULTSUMMARY_2_distinctpeptides	Distinct peptides associated with 95% confidence proteins		1		1840					Statistics - Protein Summary Table	Distinct peptides associated with 95% confidence proteins	1840
RESULTS_GROUPRESULTSUMMARY_2_proteinsbeforegroupping	Proteins before grouping (95% confidence)		1		410					Statistics - Protein Summary Table	Proteins before grouping (95% confidence)	410
RESULTS_GROUPRESULTSUMMARY_2_proteinsidentified	Proteins detected (95% confidence)		1		67					Statistics - Protein Summary Table	Proteins detected (95% confidence)	67
RESULTS_GROUPRESULTSUMMARY_2_spectraidentified	Spectra associated with 95% confidence proteins		1		36084					Statistics - Protein Summary Table	Spectra associated with 95% confidence proteins	36084
RESULTS_GROUPRESULTSUMMARY_3_confidence	Confidence of third row in summary statistics ID statistics		1		0.66		Fraction to %	100		Statistics - Protein Summary Table	Percent Confidence of first row in Summary Statistics ID Statistics	66
RESULTS_GROUPRESULTSUMMARY_3_distinctpeptides	Distinct peptides associated with 66% confidence proteins		1		1864					Statistics - Protein Summary Table	Distinct peptides associated with 66% confidence proteins	1864
RESULTS_GROUPRESULTSUMMARY_3_proteinsbeforegroupping	Proteins before grouping (66% confidence)		1		468					Statistics - Protein Summary Table	Proteins before grouping (66% confidence)	468
RESULTS_GROUPRESULTSUMMARY_3_proteinsidentified	Proteins detected (66% confidence)		1		77					Statistics - Protein Summary Table	Proteins detected (66% confidence)	77
RESULTS_GROUPRESULTSUMMARY_3_spectraidentified	Spectra associated with 66% confidence proteins		1		36309					Statistics - Protein Summary Table	Spectra associated with 66% confidence proteins	36309
RESULTS_GROUPRESULTSUMMARY_4_confidence	Confidence of fourth row in Summary Statistics ID statistics		1		0.100088		Fraction to %	100		Statistics - Protein Summary Table	Percent Confidence of first row in Summary Statistics ID Statistics	10.0088
RESULTS_GROUPRESULTSUMMARY_4_distinctpeptides	Distinct peptides associated with 10% confidence proteins		1		1933					Statistics - Protein Summary Table	Distinct peptides associated with 10% confidence proteins	1933
RESULTS_GROUPRESULTSUMMARY_4_proteinsbeforegroupping	Proteins before grouping (10% confidence)		1		636					Statistics - Protein Summary Table	Proteins before grouping (10% confidence)	636
RESULTS_GROUPRESULTSUMMARY_4_proteinsidentified	Proteins detected (10% confidence)		1		106					Statistics - Protein Summary Table	Proteins detected (10% confidence)	106
RESULTS_GROUPRESULTSUMMARY_4_spectraidentified	Spectra associated with 10% confidence proteins		1		38367					Statistics - Protein Summary Table	Spectra associated with 10% confidence proteins	38367
PARAMETERS_PEAKLIST_partnumber	Number of segments the input data are broken into	1	1	1	43					Parameters - Search Dimension Factors	Number of segments the input data are broken into	43
				1						Parameters - Search Dimension Factors	Number of searches per segment (2 for Thorough, 1 for Rapid)	2
				1						Parameters - Search Dimension Factors	Number of apparent sub-searches in group file	86
RESULTS_SEARCH_1_PARAMETERS_do_reverse_search	Do reversed search		1		TRUE					Parameters - Search Dimension Factors	Do reversed search	TRUE
RESULTS_SEARCH_1_PARAMETERS_QUANT_TYPE_separate_searches	Do separate searches for each plex in MS1 quantitation		1		FALSE					Parameters - Search Dimension Factors	Do separate searches for each plex in MS1 quantitation	FALSE
RESULTS_SEARCH_1_PARAMETERS_maxresults	Maximum number of hypotheses to keep per spectrum		1		15					Parameters - Search Dimension Factors	Maximum number of hypotheses to keep per spectrum	15
RESULTS_SEARCH_1_PARAMETERS_MSTOLERANCE_type	MS1 initial mass error tolerance type		1		dalton					Parameters - Identification - Mass accuracy	MS1 initial mass error tolerance type	dalton
RESULTS_SEARCH_1_PARAMETERS_MSTOLERANCE_value	MS1 initial mass error tolerance value		1		0.05					Parameters - Identification - Mass accuracy	MS1 initial mass error tolerance value	0.05
RESULTS_SEARCH_1_PARAMETERS_MSMSTOLERANCE_type	MS2 initial mass error tolerance type		1		dalton					Parameters - Identification - Mass accuracy	MS2 initial mass error tolerance type	dalton
RESULTS_SEARCH_1_PARAMETERS_MSMSTOLERANCE_value	MS2 initial mass error tolerance value		1		0.1					Parameters - Identification - Mass accuracy	MS2 initial mass error tolerance value	0.1
RESULTS_SEARCH_1_PARAMETERS_MS_STANDARD_DEVIATION_type	MS1 final mass error standard deviation type		1		dalton					Parameters - Identification - Mass accuracy	MS1 final mass error standard deviation type	dalton
RESULTS_SEARCH_1_PARAMETERS_MS_STANDARD_DEVIATION_value	MS1 final mass error standard deviation value		1		0.0011					Parameters - Identification - Mass accuracy	MS1 final mass error standard deviation value	0.0011
RESULTS_SEARCH_1_PARAMETERS_MSMS_STANDARD_DEVIATION_type	MS2 final mass error standard deviation type		1		dalton					Parameters - Identification - Mass accuracy	MS2 final mass error standard deviation type	dalton
RESULTS_SEARCH_1_PARAMETERS_MSMS_STANDARD_DEVIATION_value	MS2 final mass error standard deviation value		1		0.01					Parameters - Identification - Mass accuracy	MS2 final mass error standard deviation value	0.01
RESULTS_SEARCH_1_PARAMETERS_do_multiprecursor_search	Use multi-precursor search function		1		TRUE					Parameters - Identification - Multi-precursor search	Use multi-precursor search function	TRUE
RESULTS_SEARCH_1_PARAMETERS_MAX_PRECURSORS_FRAGLET	Maximum number of different precursor masses to try to match to in the Fraglet stage when doing multi-precursor search		1		5					Parameters - Identification - Multi-precursor search	Maximum number of different precursor masses to try to match to in the Fraglet stage when doing multi-precursor search	5
RESULTS_SEARCH_1_PARAMETERS_PRECURSORS_DR_FRAGLET	Maximum dynamic range gap of secondary precursors vs primary precursor in the Fraglet stage when doing multi-precursor search		1		10					Parameters - Identification - Multi-precursor search	Maximum dynamic range gap of secondary precursors vs primary precursor in the Fraglet stage when doing multi-precursor search	10
RESULTS_SEARCH_1_PARAMETERS_MAX_PRECURSORS_TAGLET	Maximum number of different precursor masses to try to match to in the Taglet stage when doing multi-precursor search		1		1					Parameters - Identification - Multi-precursor search	Maximum number of different precursor masses to try to match to in the Taglet stage when doing multi-precursor search	1
RESULTS_SEARCH_1_PARAMETERS_PRECURSORS_DR_TAGLET	Maximum dynamic range gap of secondary precursors vs primary precursor in the Taglet stage when doing multi-precursor search		1		3					Parameters - Identification - Multi-precursor search	Maximum dynamic range gap of secondary precursors vs primary precursor in the Taglet stage when doing multi-precursor search	3
RESULTS_SEARCH_1_PARAMETERS_DEFAULT_CHARGE_STATE_1_charge	First charge state to consider when precursor z is not determined		1		2					Parameters - Identification - Charge ambiguity	First charge state to consider when precursor z is not determined	2
RESULTS_SEARCH_1_PARAMETERS_DEFAULT_CHARGE_STATE_1_probability	Probability of first charge state to consider when precursor z is not determined		1		1					Parameters - Identification - Charge ambiguity	Probability of first charge state to consider when precursor z is not determined	1
RESULTS_SEARCH_1_PARAMETERS_DEFAULT_CHARGE_STATE_2_charge	Second charge state to consider when precursor z is not determined		1		3					Parameters - Identification - Charge ambiguity	Second charge state to consider when precursor z is not determined	3
RESULTS_SEARCH_1_PARAMETERS_DEFAULT_CHARGE_STATE_2_probability	Probability of second charge state to consider when precursor z is not determined		1		1					Parameters - Identification - Charge ambiguity	Probability of second charge state to consider when precursor z is not determined	1
RESULTS_SEARCH_1_PARAMETERS_DEFAULT_CHARGE_STATE_3_charge	Third charge state to consider when precursor z is not determined		1		4					Parameters - Identification - Charge ambiguity	Third charge state to consider when precursor z is not determined	4
RESULTS_SEARCH_1_PARAMETERS_DEFAULT_CHARGE_STATE_3_probability	Probability of third charge state to consider when precursor z is not determined		1		1					Parameters - Identification - Charge ambiguity	Probability of third charge state to consider when precursor z is not determined	1
RESULTS_SEARCH_1_PARAMETERS_DEFAULT_CHARGE_STATE_4_charge	Fourth charge state to consider when precursor z is not determined									Parameters - Identification - Charge ambiguity	Fourth charge state to consider when precursor z is not determined
RESULTS_SEARCH_1_PARAMETERS_DEFAULT_CHARGE_STATE_4_probability	Probability of fourth charge state to consider when precursor z is not determined									Parameters - Identification - Charge ambiguity	Probability of fourth charge state to consider when precursor z is not determined
RESULTS_SEARCH_1_PARAMETERS_PROGROUP_bayesconfidencecalclulation	Use Bayesian protein confidence calculation		1		TRUE					Parameters - Protein Grouping	Use Bayesian protein confidence calculation	TRUE
RESULTS_SEARCH_1_PARAMETERS_PROGROUP_calibrateconfidence	Use peptide FDR analysis to recalibrate peptide confidences		1		TRUE					Parameters - Protein Grouping	Use peptide FDR analysis to recalibrate peptide confidences	TRUE
RESULTS_SEARCH_1_PARAMETERS_PROGROUP_focusingintersection	In mid-Pro Group, minimum Intersection ProtScore to be in Same Group		1		4					Parameters - Protein Grouping	In mid-Pro Group, minimum Intersection ProtScore to be in Same Group	4
RESULTS_SEARCH_1_PARAMETERS_PROGROUP_focusingminunusedprotscore	In mid-Pro Group, minimum Unused ProtScore to keep a Group		1		0.1					Parameters - Protein Grouping	In mid-Pro Group, minimum Unused ProtScore to keep a Group	0.1
RESULTS_SEARCH_1_PARAMETERS_PROGROUP_focusingsubsetcutoff	In mid-Pro Group, keep competitor proteins with ProtScore units from winner		1		6					Parameters - Protein Grouping	In mid-Pro Group, keep competitor proteins with ProtScore units from winner	6
RESULTS_SEARCH_1_PARAMETERS_PROGROUP_intersection	In final Pro Group, minimum Intersection ProtScore to be in same group		1		1.3					Parameters - Protein Grouping	In final Pro Group, minimum Intersection ProtScore to be in same group	1.3
RESULTS_SEARCH_1_PARAMETERS_PROGROUP_minunusedprotscore	In final Pro Group, minimum Unused ProtScore to keep a group		1		0.0458					Parameters - Protein Grouping	In final Pro Group, minimum Unused ProtScore to keep a group	0.0458
RESULTS_SEARCH_1_PARAMETERS_PROGROUP_subsetcutoff	In final Pro Group, keep competitor proteins with ProtScore units from winner		1		2					Parameters - Protein Grouping	In final Pro Group, keep competitor proteins with ProtScore units from winner	2
RESULTS_SEARCH_1_PARAMETERS_QUANT_TYPE_background_correction	Do isobaric quant background correction algorithm		1		FALSE					Parameters - Quantitation - processing	Do isobaric quant background correction algorithm	FALSE
RESULTS_SEARCH_1_PARAMETERS_QUANT_TYPE_bias_correction	Normalize the central tendency of protein ratios to be unity		1		TRUE					Parameters - Quantitation - processing	Normalize the central tendency of protein ratios to be unity	TRUE
RESULTS_SEARCH_1_PARAMETERS_QUANT_TYPE_median_statistic	Compute protein-level ratios from the median of peptide ratios		1		TRUE					Parameters - Quantitation - processing	Compute protein-level ratios from the median of peptide ratios	TRUE
RESULTS_SEARCH_1_PARAMETERS_QUANT_TYPE_quant_threshold	Quant threshold setting no longer used		1		-1					Parameters - Quantitation - processing	Quant threshold setting no longer used	-1
RESULTS_SEARCH_1_PARAMETERS_QUANT_TYPE_quant_threshold_sn	Use measures for quantitation if signal to noise is greater than		1		9					Parameters - Quantitation - processing	Use measures for quantitation if signal to noise is greater than	9
RESULTS_SEARCH_1_PARAMETERS_max_quant_labels	Maximum number of labels allowed on a peptide for it to be used for quantitation		1		35					Parameters - Quantitation - curation	Maximum number of labels allowed on a peptide for it to be used for quantitation	35
RESULTS_SEARCH_1_PARAMETERS_QUANT_TYPE_keep_extreme_peptides_over_fraction	Include extreme ratios in the protein ratio calculation if the fraction of peptides from a protein having extreme ratios is greater than		1		0					Parameters - Quantitation - curation	Include extreme ratios in the protein ratio calculation if the fraction of peptides from a protein having extreme ratios is greater than	0
RESULTS_SEARCH_1_PARAMETERS_QUANT_TYPE_low_confidence_check	Exclude quantitation data if identification confidence does not pass a threshold value		1		TRUE					Parameters - Quantitation - curation	Exclude quantitation data if identification confidence does not pass a threshold value	TRUE
RESULTS_SEARCH_1_PARAMETERS_QUANT_TYPE_low_intensity_check	Exclude quantitation data if a minimum intensity is not passed		1		TRUE					Parameters - Quantitation - curation	Exclude quantitation data if a minimum intensity is not passed	TRUE
RESULTS_SEARCH_1_PARAMETERS_QUANT_TYPE_mod_check	Exclude quantitation data based on discordant peptide logic		1		TRUE					Parameters - Quantitation - curation	Exclude quantitation data based on discordant peptide logic	TRUE
RESULTS_SEARCH_1_PARAMETERS_QUANT_TYPE_shared_msms_check	Exclude quantitation data using sharing logic		1		TRUE					Parameters - Quantitation - curation	Exclude quantitation data using sharing logic	TRUE
RESULTS_SEARCH_1_PARAMETERS_PROGROUP_unusedprotscorethresholdforexcludingothersfromquant	Minimum protein confidence to consider a protein confident and capable of excluding spectra as shared		1		1.3					Parameters - Quantitation - curation	Minimum protein confidence to consider a protein confident and capable of excluding spectra as shared	1.3
RESULTS_SEARCH_1_PARAMETERS_PROGROUP_confidencepercentthresholdforexcludingothersfromquant	Minimum peptide percent confidence from a confident protein to consider a spectrum shared		1		15					Parameters - Quantitation - curation	Minimum peptide percent confidence from a confident protein to consider a spectrum shared	15
RESULTS_SEARCH_1_PARAMETERS_PROGROUP_confidencepercentthresholdforincludingselfinquant	Minimum peptide confidence to be used for quantitation		1		15					Parameters - Quantitation - curation	Minimum peptide confidence to be used for quantitation	15
RESULTS_SEARCH_1_PARAMETERS_PROGROUP_autodiscordantpeptidethreshold	Consider a peptide discordant if joint feature probability less than		1		0.3					Parameters - Quantitation - curation	Consider a peptide discordant if joint feature probability less than	0.3
RESULTS_SEARCH_1_PARAMETERS_PROGROUP_compresspeptides	Show results only for distinct peptides, suppressing redundancy		1		FALSE					Parameters - Non-functional	Show results only for distinct peptides, suppressing redundancy	FALSE
RESULTS_SEARCH_1_PARAMETERS_PROGROUP_donotstoremspeaklists	Do not store MS1 level data		1		FALSE					Parameters - Non-functional	Do not store MS1 level data	FALSE
RESULTS_SEARCH_STAT_search_begin_time_clock	Start time - Search		1		01/19/2021 16:07:13					Statistics - Processing Times - Start&Stop Clock Times	Start time - Search	01/19/2021 16:07:13
RESULTS_SEARCH_STAT_search_end_time_clock	End time - Search		1		01/20/2021 19:27:15					Statistics - Processing Times - Start&Stop Clock Times	End time - Search	01/20/2021 19:27:15
RESULTS_SEARCH_STAT_stage_searching_begin_time_clock	Start time - Identification algorithm stages		1		01/20/2021 15:24:44					Statistics - Processing Times - Start&Stop Clock Times	Start time - Identification algorithm stages	01/20/2021 15:24:44
RESULTS_SEARCH_STAT_stage_searching_end_time_clock	End time - Identification algorithm stages		1		01/20/2021 17:51:44					Statistics - Processing Times - Start&Stop Clock Times	End time - Identification algorithm stages	01/20/2021 17:51:44
RESULTS_SEARCH_STAT_stage_signal_processing_begin_time_clock	Start time - Signal processing stage		1		01/19/2021 16:07:14					Statistics - Processing Times - Start&Stop Clock Times	Start time - Signal processing stage	01/19/2021 16:07:14
RESULTS_SEARCH_STAT_stage_signal_processing_end_time_clock	End time - Signal processing stage		1		01/20/2021 15:21:12					Statistics - Processing Times - Start&Stop Clock Times	End time - Signal processing stage	01/20/2021 15:21:12
RESULTS_SEARCH_STAT_stage_waiting_begin_time_clock	Start time - Waiting stage		1		01/20/2021 15:21:12					Statistics - Processing Times - Start&Stop Clock Times	Start time - Waiting stage	01/20/2021 15:21:12
RESULTS_SEARCH_STAT_stage_waiting_end_time_clock	End time - Waiting stage		1		01/20/2021 15:24:44					Statistics - Processing Times - Start&Stop Clock Times	End time - Waiting stage	01/20/2021 15:24:44
RESULTS_SEARCH_STAT_task_fraglet_exe_begin_time_clock	Start time - Fraglet Algorithm search stage		1		01/20/2021 15:21:19					Statistics - Processing Times - Start&Stop Clock Times	Start time - Fraglet Algorithm search stage	01/20/2021 15:21:19
RESULTS_SEARCH_STAT_task_fraglet_exe_end_time_clock	End time - Fraglet Algorithm search stage		1		01/20/2021 16:44:18					Statistics - Processing Times - Start&Stop Clock Times	End time - Fraglet Algorithm search stage	01/20/2021 16:44:18
RESULTS_SEARCH_STAT_task_focusing_begin_time_clock	Start time - Mid-Pro Group Algorithm stage		1		01/20/2021 16:44:18					Statistics - Processing Times - Start&Stop Clock Times	Start time - Mid-Pro Group Algorithm stage	01/20/2021 16:44:18
RESULTS_SEARCH_STAT_task_focusing_end_time_clock	End time - Mid-Pro Group Algorithm stage		1		01/20/2021 16:57:26					Statistics - Processing Times - Start&Stop Clock Times	End time - Mid-Pro Group Algorithm stage	01/20/2021 16:57:26
RESULTS_SEARCH_STAT_task_taglet_exe_begin_time_clock	Start time - Taglet Algorithm search stage		1		01/20/2021 16:57:26					Statistics - Processing Times - Start&Stop Clock Times	Start time - Taglet Algorithm search stage	01/20/2021 16:57:26
RESULTS_SEARCH_STAT_task_taglet_exe_end_time_clock	End time - Taglet Algorithm search stage		1		01/20/2021 17:38:15					Statistics - Processing Times - Start&Stop Clock Times	End time - Taglet Algorithm search stage	01/20/2021 17:38:15
RESULTS_SEARCH_STAT_task_progroup_begin_time_clock	Start time - Final Pro Group Algorithm stage		1		01/20/2021 17:38:15					Statistics - Processing Times - Start&Stop Clock Times	Start time - Final Pro Group Algorithm stage	01/20/2021 17:38:15
RESULTS_SEARCH_STAT_task_progroup_end_time_clock	End time - Final Pro Group Algorithm stage		1		01/20/2021 17:51:44					Statistics - Processing Times - Start&Stop Clock Times	End time - Final Pro Group Algorithm stage	01/20/2021 17:51:44
RESULTS_SEARCH_STAT_stage_fdr_begin_time_clock	Start time - FDR analysis stage		1		01/20/2021 17:51:45					Statistics - Processing Times - Start&Stop Clock Times	Start time - FDR analysis stage	01/20/2021 17:51:45
RESULTS_SEARCH_STAT_stage_fdr_end_time_clock	End time - FDR analysis stage		1		01/20/2021 19:27:15					Statistics - Processing Times - Start&Stop Clock Times	End time - FDR analysis stage	01/20/2021 19:27:15
RESULTS_SEARCH_STAT_search_time_duration	Clock Time Duration for Full Search (ms)		1		98401674		msec to min	1.66667e-05		Statistics - Processing Times - Duration in Real Clock Times	Clock time duration - Full search (min)	1640.03
RESULTS_SEARCH_STAT_stage_searching_time_duration	Clock Time Duration for Identification Algorithm Stages (ms)		1		8819863		msec to min	1.66667e-05		Statistics - Processing Times - Duration in Real Clock Times	Clock time duration - Identification algorithm stages (min)	146.998
RESULTS_SEARCH_STAT_stage_signal_processing_time_duration	Clock Time Duration for Waiting Stage (ms)		1		83638059		msec to min	1.66667e-05		Statistics - Processing Times - Duration in Real Clock Times	Clock time duration - Signal processing stage (min)	1393.97
RESULTS_SEARCH_STAT_stage_waiting_time_duration	Clock Time Duration for Signal Processing Stage (ms)		1		212542		msec to min	1.66667e-05		Statistics - Processing Times - Duration in Real Clock Times	Clock time duration - Waiting stage (min)	3.54237
RESULTS_SEARCH_STAT_task_fraglet_exe_time_duration	Clock Time Duration for Fraglet Algorithm Stage (ms)		1		4978713		msec to min	1.66667e-05		Statistics - Processing Times - Duration in Real Clock Times	Clock time duration - Fraglet Algorithm stage (min)	82.9785
RESULTS_SEARCH_STAT_task_focusing_time_duration	Clock Time Duration for Mid-Pro Group Algorithm Stage (ms)		1		787596		msec to min	1.66667e-05		Statistics - Processing Times - Duration in Real Clock Times	Clock time duration - Mid-Pro Group Algorithm stage (min)	13.1266
RESULTS_SEARCH_STAT_task_taglet_exe_time_duration	Clock Time Duration for Taglet Algorithm Stage (ms)		1		2449218		msec to min	1.66667e-05		Statistics - Processing Times - Duration in Real Clock Times	Clock time duration - Taglet Algorithm stage (min)	40.8203
RESULTS_SEARCH_STAT_task_progroup_time_duration	Clock Time Duration for Pro Group Algorithm Stage (ms)		1		808953		msec to min	1.66667e-05		Statistics - Processing Times - Duration in Real Clock Times	Clock time duration - Pro Group Algorithm stage (min)	13.4825
RESULTS_SEARCH_STAT_stage_fdr_time_duration	Clock Time Duration for FDR Analysis (ms)		1		5729507		msec to min	1.66667e-05		Statistics - Processing Times - Duration in Real Clock Times	Clock time duration - FDR Analysis (min)	95.4918
				1						Statistics - Processing Times - Duration in Real Clock Times	Clock time not accounted for in measured stages	-3.3819
	CPU Time Duration for Signal Processing Stage (ms)						msec to min	1.66667e-05		Statistics - Processing Times - Duration in CPU Time	CPU time duration - Signal Processing stage (min)
RESULTS_SEARCH_STAT_task_fraglet_exe_time_cpu	CPU Time Duration for Fraglet Algorithm Stage (ms)		1		10424688		msec to min	1.66667e-05		Statistics - Processing Times - Duration in CPU Time	CPU time duration - Fraglet Algorithm stage (min)	173.745
RESULTS_SEARCH_STAT_task_focusing_time_cpu	CPU Time Duration for Mid-Pro Group Algorithm Stage (ms)		1		546190		msec to min	1.66667e-05		Statistics - Processing Times - Duration in CPU Time	CPU time duration - Mid-Pro Group Algorithm stage (min)	9.10317
RESULTS_SEARCH_STAT_task_taglet_exe_time_cpu	CPU Time Duration for Taglet Algorithm Stage (ms)		1		14520822		msec to min	1.66667e-05		Statistics - Processing Times - Duration in CPU Time	CPU time duration - Taglet Algorithm stage (min)	242.014
RESULTS_SEARCH_STAT_task_progroup_time_cpu	CPU Time Duration for Pro Group Algorithm Stage (ms)		1		863699		msec to min	1.66667e-05		Statistics - Processing Times - Duration in CPU Time	CPU time duration - Pro Group Algorithm stage (min)	14.395
				1						Statistics - Processing Times - Percent by Stage	Percent of clock time - Identification Algorithm stages	0.0896312
				1						Statistics - Processing Times - Percent by Stage	Percent of clock time - Signal Processing stage	0.849966
				1						Statistics - Processing Times - Percent by Stage	Percent of clock time - Waiting stage	0.00215994
				1						Statistics - Processing Times - Percent by Stage	Percent of clock time - Fraglet Algorithm stage	0.0505958
				1						Statistics - Processing Times - Percent by Stage	Percent of clock time - Mid-Pro Group Algorithm stage	0.00800389
				1						Statistics - Processing Times - Percent by Stage	Percent of clock time - Taglet Algorithm stage	0.02489
				1						Statistics - Processing Times - Percent by Stage	Percent of clock time - Pro Group Algorithm stage	0.00822093
				1						Statistics - Processing Times - Percent by Stage	Percent of clock time - FDR Analysis	0.0582257
				1						Statistics - Processing Rate - Clock (Sec/Spectrum)	Clock time rate (sec/spect) - Full Search	0.667374
				1						Statistics - Processing Rate - Clock (Sec/Spectrum)	Clock time rate (sec/spect) - Identification Algorithm stages	0.0598176
				1						Statistics - Processing Rate - Clock (Sec/Spectrum)	Clock time rate (sec/spect) - Signal processing stage	0.567245
				1						Statistics - Processing Rate - Clock (Sec/Spectrum)	Clock time rate (sec/spect) - Waiting stage	0.00144149
				1						Statistics - Processing Rate - Clock (Sec/Spectrum)	Clock time rate (sec/spect) - Fraglet Algorithm stage	0.0337663
				1						Statistics - Processing Rate - Clock (Sec/Spectrum)	Clock time rate (sec/spect) - Mid-Pro Group Algorithm stage	0.00534159
				1						Statistics - Processing Rate - Clock (Sec/Spectrum)	Clock time rate (sec/spect) - Taglet Algorithm stage	0.0166109
				1						Statistics - Processing Rate - Clock (Sec/Spectrum)	Clock time rate (sec/spect) - Pro Group Algorithm stage	0.00548644
				1						Statistics - Processing Rate - Clock (Sec/Spectrum)	Clock time rate (sec/spect) - FDR Analysis	0.0388583
				1						Statistics - Processing Rate - CPU (Sec/Spectrum)	CPU time rate (sec/spect) - Signal processing stage
				1						Statistics - Processing Rate - CPU (Sec/Spectrum)	CPU time rate (sec/spect) - Fraglet Algorithm stage	0.0707017
				1						Statistics - Processing Rate - CPU (Sec/Spectrum)	CPU time rate (sec/spect) - Mid-Pro Group Algorithm stage	0.00370434
				1						Statistics - Processing Rate - CPU (Sec/Spectrum)	CPU time rate (sec/spect) - Taglet Algorithm stage	0.0984823
				1						Statistics - Processing Rate - CPU (Sec/Spectrum)	CPU time rate (sec/spect) - Pro Group Algorithm stage	0.00585773
				1						Statistics - Processing Rate - Clock (Sec/Spectrum/DB Protein)	Clock time rate (sec/spect/DB protein) - Full search	4.43662e-06
				1						Statistics - Processing Rate - Clock (Sec/Spectrum/DB Protein)	Clock time rate (sec/spect/DB protein) - Identification algorithm stages	3.9766e-07
				1						Statistics - Processing Rate - Clock (Sec/Spectrum/DB Protein)	Clock time rate (sec/spect/DB protein) - Signal processing stage	3.77098e-06
				1						Statistics - Processing Rate - Clock (Sec/Spectrum/DB Protein)	Clock time rate (sec/spect/DB protein) - Waiting stage	9.58285e-09
				1						Statistics - Processing Rate - Clock (Sec/Spectrum/DB Protein)	Clock time rate (sec/spect/DB protein) - Fraglet Algorithm stage	2.24474e-07
				1						Statistics - Processing Rate - Clock (Sec/Spectrum/DB Protein)	Clock time rate (sec/spect/DB protein) - Mid-Pro Group Algorithm stage	3.55102e-08
				1						Statistics - Processing Rate - Clock (Sec/Spectrum/DB Protein)	Clock time rate (sec/spect/DB protein) - Taglet Algorithm stage	1.10428e-07
				1						Statistics - Processing Rate - Clock (Sec/Spectrum/DB Protein)	Clock time rate (sec/spect/DB protein) - Pro Group Algorithm stage	3.64731e-08
				1						Statistics - Processing Rate - Clock (Sec/Spectrum/DB Protein)	Clock time rate (sec/spect/DB protein) - FDR Analysis	2.58325e-07
				1						Statistics - Processing Rate - CPU (Sec/Spectrum/DB Protein)	CPU time rate (sec/spect/DB protein) - Signal processing stage
				1						Statistics - Processing Rate - CPU (Sec/Spectrum/DB Protein)	CPU time rate (sec/spect/DB protein) - Fraglet Algorithm stage	4.70016e-07
				1						Statistics - Processing Rate - CPU (Sec/Spectrum/DB Protein)	CPU time rate (sec/spect/DB protein) - Mid-Pro Group Algorithm stage	2.4626e-08
				1						Statistics - Processing Rate - CPU (Sec/Spectrum/DB Protein)	CPU time rate (sec/spect/DB protein) - Taglet Algorithm stage	6.54698e-07
				1						Statistics - Processing Rate - CPU (Sec/Spectrum/DB Protein)	CPU time rate (sec/spect/DB protein) - Pro Group Algorithm stage	3.89415e-08
				1						Statistics - Extent of Distribution - Fundamental	Distribution factor - CPU vs. clock time - Signal processing stage
				1						Statistics - Extent of Distribution - Fundamental	Distribution factor - CPU vs. clock time - Fraglet Algorithm stage	2.09385
				1						Statistics - Extent of Distribution - Fundamental	Distribution factor - CPU vs. clock time - Mid-Pro Group Algorithm stage	0.69349
				1						Statistics - Extent of Distribution - Fundamental	Distribution factor - CPU vs. clock time - Taglet Algorithm stage	5.92876
				1						Statistics - Extent of Distribution - Fundamental	Distribution factor - CPU vs. clock time - Pro Group Algorithm stage	1.06768
				1						Statistics - Extent of Distribution - vs Segments	Ratio of distribution factor to number of search segments - Signal processing stage
				1						Statistics - Extent of Distribution - vs Segments	Ratio of distribution factor to number of search segments - Fraglet Algorithm stage	0.0486942
				1						Statistics - Extent of Distribution - vs Segments	Ratio of distribution factor to number of search segments - Mid-Pro Group Algorithm stage	0.0161277
				1						Statistics - Extent of Distribution - vs Segments	Ratio of distribution factor to number of search segments - Taglet Algorithm stage	0.137878
				1						Statistics - Extent of Distribution - vs Segments	Ratio of distribution factor to number of search segments - Pro Group Algorithm stage	0.0248297
				1						Statistics - Extent of Distribution - vs Licensed Cores	Ratio of distribution factor to number of licensed cores - Signal processing stage
				1						Statistics - Extent of Distribution - vs Licensed Cores	Ratio of distribution factor to number of licensed cores - Fraglet Algorithm stage	0.130866
				1						Statistics - Extent of Distribution - vs Licensed Cores	Ratio of distribution factor to number of licensed cores - Mid-Pro Group Algorithm stage	0.0433431
				1						Statistics - Extent of Distribution - vs Licensed Cores	Ratio of distribution factor to number of licensed cores - Taglet Algorithm stage	0.370547
				1						Statistics - Extent of Distribution - vs Licensed Cores	Ratio of distribution factor to number of licensed cores - Pro Group Algorithm stage	0.0667297
PARAMETERS_PEAKLIST_original_count	Average number of spectra per segment	1	1	1	3428.98					Statistics - Search Segmentation	Average number of spectra per segment	3428.98
PARAMETERS_PEAKLIST_original_count	Standard deviation of number of spectra per segment	1	1	1	342.655					Statistics - Search Segmentation	Standard deviation of number of spectra per segment	342.655
PARAMETERS_PEAKLIST_original_count	Maximum number of spectra per segment	1	1	1	3947					Statistics - Search Segmentation	Maximum number of spectra per segment	3947
PARAMETERS_PEAKLIST_original_count	Minimum number of spectra per segment	1	1	1	2804					Statistics - Search Segmentation	Minimum number of spectra per segment	2804
										Attributes - Input data filenames	Filename of Input File 1	C:\AB SCIEX\ProteinPilot Data\Results\Albert\ZX 20200429 6600\ZX 20200429 6600 C 1.wiff
										Attributes - Input data filenames	Filename of Input File 2	C:\AB SCIEX\ProteinPilot Data\Results\Albert\ZX 20200429 6600\ZX 20200429 6600 C 2.wiff
										Attributes - Input data filenames	Filename of Input File 3	C:\AB SCIEX\ProteinPilot Data\Results\Albert\ZX 20200429 6600\ZX 20200429 6600 C 3.wiff
										Attributes - Input data filenames	Filename of Input File 4	C:\AB SCIEX\ProteinPilot Data\Results\Albert\ZX 20200429 6600\ZX 20200429 6600 C 4.wiff
										Attributes - Input data filenames	Filename of Input File 5	C:\AB SCIEX\ProteinPilot Data\Results\Albert\ZX 20200429 6600\ZX 20200429 6600 C 5.wiff
										Attributes - Input data filenames	Filename of Input File 6	C:\AB SCIEX\ProteinPilot Data\Results\Albert\ZX 20200429 6600\ZX 20200429 6600 C 6.wiff
										Attributes - Input data filenames	Filename of Input File 7	C:\AB SCIEX\ProteinPilot Data\Results\Albert\ZX 20200429 6600\ZX 20200429 6600 C 7.wiff
										Attributes - Input data filenames	Filename of Input File 8	C:\AB SCIEX\ProteinPilot Data\Results\Albert\ZX 20200429 6600\ZX 20200429 6600 C 8.wiff
										Attributes - Input data filenames	Filename of Input File 9	C:\AB SCIEX\ProteinPilot Data\Results\Albert\ZX 20200429 6600\ZX 20200429 6600 C 9.wiff
										Attributes - Input data filenames	Filename of Input File 10	C:\AB SCIEX\ProteinPilot Data\Results\Albert\ZX 20200429 6600\ZX 20200429 6600 C 10.wiff
										Attributes - Input data filenames	Filename of Input File 11	C:\AB SCIEX\ProteinPilot Data\Results\Albert\ZX 20200429 6600\ZX 20200429 6600 C 11.wiff
										Attributes - Input data filenames	Filename of Input File 12	C:\AB SCIEX\ProteinPilot Data\Results\Albert\ZX 20200429 6600\ZX 20200429 6600 C 12.wiff
										Attributes - Input data filenames	Filename of Input File 13	C:\AB SCIEX\ProteinPilot Data\Results\Albert\ZX 20200429 6600\ZX 20200429 6600 C 13.wiff
										Attributes - Input data filenames	Filename of Input File 14
										Attributes - Input data filenames	Filename of Input File 15
										Attributes - Input data filenames	Filename of Input File 16
										Attributes - Input data filenames	Filename of Input File 17
										Attributes - Input data filenames	Filename of Input File 18
										Attributes - Input data filenames	Filename of Input File 19
										Attributes - Input data filenames	Filename of Input File 20
										Attributes - Input data filenames	Filename of Input File 21
										Attributes - Input data filenames	Filename of Input File 22
										Attributes - Input data filenames	Filename of Input File 23
										Attributes - Input data filenames	Filename of Input File 24
										Attributes - Input data filenames	Filename of Input File 25
										Attributes - Input data filenames	Filename of Input File 26
										Attributes - Input data filenames	Filename of Input File 27
										Attributes - Input data filenames	Filename of Input File 28
										Attributes - Input data filenames	Filename of Input File 29
										Attributes - Input data filenames	Filename of Input File 30
										Attributes - Input data filenames	Filename of Input File 31
										Attributes - Input data filenames	Filename of Input File 32
										Attributes - Input data filenames	Filename of Input File 33
										Attributes - Input data filenames	Filename of Input File 34
										Attributes - Input data filenames	Filename of Input File 35
										Attributes - Input data filenames	Filename of Input File 36
										Attributes - Input data filenames	Filename of Input File 37
										Attributes - Input data filenames	Filename of Input File 38
										Attributes - Input data filenames	Filename of Input File 39
										Attributes - Input data filenames	Filename of Input File 40
										Attributes - Input data filenames	Filename of Input File 41
										Attributes - Input data filenames	Filename of Input File 42
										Attributes - Input data filenames	Filename of Input File 43
										Attributes - Input data filenames	Filename of Input File 44
										Attributes - Input data filenames	Filename of Input File 45
										Attributes - Input data filenames	Filename of Input File 46
										Attributes - Input data filenames	Filename of Input File 47
										Attributes - Input data filenames	Filename of Input File 48
										Attributes - Input data filenames	Filename of Input File 49
										Attributes - Input data filenames	Filename of Input File 50
										Attributes - Input data filenames	Filename of Input File 51
										Attributes - Input data filenames	Filename of Input File 52
										Attributes - Input data filenames	Filename of Input File 53
										Attributes - Input data filenames	Filename of Input File 54
										Attributes - Input data filenames	Filename of Input File 55
										Attributes - Input data filenames	Filename of Input File 56
										Attributes - Input data filenames	Filename of Input File 57
										Attributes - Input data filenames	Filename of Input File 58
										Attributes - Input data filenames	Filename of Input File 59
										Attributes - Input data filenames	Filename of Input File 60
										Attributes - Input data filenames	Filename of Input File 61
										Attributes - Input data filenames	Filename of Input File 62
										Attributes - Input data filenames	Filename of Input File 63
										Attributes - Input data filenames	Filename of Input File 64
										Attributes - Input data filenames	Filename of Input File 65
										Attributes - Input data filenames	Filename of Input File 66
										Attributes - Input data filenames	Filename of Input File 67
										Attributes - Input data filenames	Filename of Input File 68
										Attributes - Input data filenames	Filename of Input File 69
										Attributes - Input data filenames	Filename of Input File 70
										Attributes - Input data filenames	Filename of Input File 71
										Attributes - Input data filenames	Filename of Input File 72
										Attributes - Input data filenames	Filename of Input File 73
										Attributes - Input data filenames	Filename of Input File 74
										Attributes - Input data filenames	Filename of Input File 75
										Attributes - Input data filenames	Filename of Input File 76
										Attributes - Input data filenames	Filename of Input File 77
										Attributes - Input data filenames	Filename of Input File 78
										Attributes - Input data filenames	Filename of Input File 79
										Attributes - Input data filenames	Filename of Input File 80
										Attributes - Input data filenames	Filename of Input File 81
										Attributes - Input data filenames	Filename of Input File 82
										Attributes - Input data filenames	Filename of Input File 83
										Attributes - Input data filenames	Filename of Input File 84
										Attributes - Input data filenames	Filename of Input File 85
										Attributes - Input data filenames	Filename of Input File 86
										Attributes - Input data filenames	Filename of Input File 87
										Attributes - Input data filenames	Filename of Input File 88
										Attributes - Input data filenames	Filename of Input File 89
										Attributes - Input data filenames	Filename of Input File 90
										Attributes - Input data filenames	Filename of Input File 91
										Attributes - Input data filenames	Filename of Input File 92
										Attributes - Input data filenames	Filename of Input File 93
										Attributes - Input data filenames	Filename of Input File 94
										Attributes - Input data filenames	Filename of Input File 95
										Attributes - Input data filenames	Filename of Input File 96
										Attributes - Input data filenames	Filename of Input File 97
										Attributes - Input data filenames	Filename of Input File 98
										Attributes - Input data filenames	Filename of Input File 99
										Attributes - Input data filenames	Filename of Input File 100
										Attributes - Input data filenames	Filename of Input File 101
										Attributes - Input data filenames	Filename of Input File 102
										Attributes - Input data filenames	Filename of Input File 103
										Attributes - Input data filenames	Filename of Input File 104
										Attributes - Input data filenames	Filename of Input File 105
										Attributes - Input data filenames	Filename of Input File 106
										Attributes - Input data filenames	Filename of Input File 107
										Attributes - Input data filenames	Filename of Input File 108
										Attributes - Input data filenames	Filename of Input File 109
										Attributes - Input data filenames	Filename of Input File 110
										Attributes - Input data filenames	Filename of Input File 111
										Attributes - Input data filenames	Filename of Input File 112
										Attributes - Input data filenames	Filename of Input File 113
										Attributes - Input data filenames	Filename of Input File 114
										Attributes - Input data filenames	Filename of Input File 115
										Attributes - Input data filenames	Filename of Input File 116
										Attributes - Input data filenames	Filename of Input File 117
										Attributes - Input data filenames	Filename of Input File 118
										Attributes - Input data filenames	Filename of Input File 119
										Attributes - Input data filenames	Filename of Input File 120
										Attributes - Input data filenames	Filename of Input File 121
										Attributes - Input data filenames	Filename of Input File 122
										Attributes - Input data filenames	Filename of Input File 123
										Attributes - Input data filenames	Filename of Input File 124
										Attributes - Input data filenames	Filename of Input File 125
										Attributes - Input data filenames	Filename of Input File 126
										Attributes - Input data filenames	Filename of Input File 127
										Attributes - Input data filenames	Filename of Input File 128
										Attributes - Input data filenames	Filename of Input File 129
										Attributes - Input data filenames	Filename of Input File 130
										Attributes - Input data filenames	Filename of Input File 131
										Attributes - Input data filenames	Filename of Input File 132
										Attributes - Input data filenames	Filename of Input File 133
										Attributes - Input data filenames	Filename of Input File 134
										Attributes - Input data filenames	Filename of Input File 135
										Attributes - Input data filenames	Filename of Input File 136
										Attributes - Input data filenames	Filename of Input File 137
										Attributes - Input data filenames	Filename of Input File 138
										Attributes - Input data filenames	Filename of Input File 139
										Attributes - Input data filenames	Filename of Input File 140
										Attributes - Input data filenames	Filename of Input File 141
										Attributes - Input data filenames	Filename of Input File 142
										Attributes - Input data filenames	Filename of Input File 143
										Attributes - Input data filenames	Filename of Input File 144
										Attributes - Input data filenames	Filename of Input File 145
										Attributes - Input data filenames	Filename of Input File 146
										Attributes - Input data filenames	Filename of Input File 147
										Attributes - Input data filenames	Filename of Input File 148
										Attributes - Input data filenames	Filename of Input File 149
										Attributes - Input data filenames	Filename of Input File 150
										Attributes - Input data filenames	Filename of Input File 151
										Attributes - Input data filenames	Filename of Input File 152
										Attributes - Input data filenames	Filename of Input File 153
										Attributes - Input data filenames	Filename of Input File 154
										Attributes - Input data filenames	Filename of Input File 155
										Attributes - Input data filenames	Filename of Input File 156
										Attributes - Input data filenames	Filename of Input File 157
										Attributes - Input data filenames	Filename of Input File 158
										Attributes - Input data filenames	Filename of Input File 159
										Attributes - Input data filenames	Filename of Input File 160
										Attributes - Input data filenames	Filename of Input File 161
										Attributes - Input data filenames	Filename of Input File 162
										Attributes - Input data filenames	Filename of Input File 163
										Attributes - Input data filenames	Filename of Input File 164
										Attributes - Input data filenames	Filename of Input File 165
										Attributes - Input data filenames	Filename of Input File 166
										Attributes - Input data filenames	Filename of Input File 167
										Attributes - Input data filenames	Filename of Input File 168
										Attributes - Input data filenames	Filename of Input File 169
										Attributes - Input data filenames	Filename of Input File 170
										Attributes - Input data filenames	Filename of Input File 171
										Attributes - Input data filenames	Filename of Input File 172
										Attributes - Input data filenames	Filename of Input File 173
										Attributes - Input data filenames	Filename of Input File 174
										Attributes - Input data filenames	Filename of Input File 175
										Attributes - Input data filenames	Filename of Input File 176
										Attributes - Input data filenames	Filename of Input File 177
										Attributes - Input data filenames	Filename of Input File 178
										Attributes - Input data filenames	Filename of Input File 179
										Attributes - Input data filenames	Filename of Input File 180
										Attributes - Input data filenames	Filename of Input File 181
										Attributes - Input data filenames	Filename of Input File 182
										Attributes - Input data filenames	Filename of Input File 183
										Attributes - Input data filenames	Filename of Input File 184
										Attributes - Input data filenames	Filename of Input File 185
										Attributes - Input data filenames	Filename of Input File 186
										Attributes - Input data filenames	Filename of Input File 187
										Attributes - Input data filenames	Filename of Input File 188
										Attributes - Input data filenames	Filename of Input File 189
										Attributes - Input data filenames	Filename of Input File 190
										Attributes - Input data filenames	Filename of Input File 191
										Attributes - Input data filenames	Filename of Input File 192
										Attributes - Input data filenames	Filename of Input File 193
										Attributes - Input data filenames	Filename of Input File 194
										Attributes - Input data filenames	Filename of Input File 195
										Attributes - Input data filenames	Filename of Input File 196
										Attributes - Input data filenames	Filename of Input File 197
										Attributes - Input data filenames	Filename of Input File 198
										Attributes - Input data filenames	Filename of Input File 199
										Attributes - Input data filenames	Filename of Input File 200

## Sheet: Protein Level Data
Protein Level Data	Unused ProtScore Threshold	Confidence Threshold	Forward	Reverse	Correct	Incorrect	Total	Global FDR	q-value	Fit Unused ProtScore Threshold	Fit Confidence Threshold	Fit Forward	Fit Reverse	Fit Correct	Fit Incorrect	Fit Total	Fit Global FDR	Fit Local FDR
	134.1	1	1	0	1	0	1	0	0	134.1	1	0.999999	6.58947e-07	0.999999	1.31789e-06	1	1.31789e-06	1.31871e-06
	127.99	1	2	0	2	0	2	0	0	127.99	1	2	1.31871e-06	2	2.63743e-06	2	1.31871e-06	1.31953e-06
	103.94	1	3	0	3	0	3	0	0	103.94	1	3	1.9793e-06	3	3.9586e-06	3	1.31953e-06	1.32118e-06
	76.48	1	4	0	4	0	4	0	0	76.48	1	4	2.64071e-06	3.99999	5.28142e-06	4	1.32036e-06	1.32282e-06
	70.66	1	5	0	5	0	5	0	0	70.66	1	5	3.30295e-06	4.99999	6.60589e-06	5	1.32118e-06	1.32447e-06
	51.33	1	6	0	6	0	6	0	0	51.33	1	6	3.966e-06	5.99999	7.932e-06	6	1.322e-06	1.32611e-06
	44.28	1	7	0	7	0	7	0	0	44.28	1	7	4.62988e-06	6.99999	9.25977e-06	7	1.32282e-06	1.32776e-06
	41.44	1	8	0	8	0	8	0	0	41.44	1	7.99999	5.29459e-06	7.99999	1.05892e-05	8	1.32365e-06	1.32941e-06
	35.95	1	9	0	9	0	9	0	0	35.95	1	8.99999	5.96012e-06	8.99999	1.19202e-05	9	1.32447e-06	1.33107e-06
	24.19	1	10	0	10	0	10	0	0	24.19	1	9.99999	6.62648e-06	9.99999	1.3253e-05	10	1.3253e-06	1.33272e-06
	23.91	1	11	0	11	0	11	0	0	23.91	1	11	7.29367e-06	11	1.45873e-05	11	1.32612e-06	1.33438e-06
	23.67	1	12	0	12	0	12	0	0	23.67	1	12	7.96169e-06	12	1.59234e-05	12	1.32695e-06	1.33604e-06
	20.56	1	13	0	13	0	13	0	0	20.56	1	13	8.63054e-06	13	1.72611e-05	13	1.32778e-06	1.33769e-06
	20.47	1	14	0	14	0	14	0	0	20.47	1	14	9.30022e-06	14	1.86004e-05	14	1.3286e-06	1.33936e-06
	19.73	1	15	0	15	0	15	0	0	19.73	1	15	9.97073e-06	15	1.99415e-05	15	1.32943e-06	1.34102e-06
	16.69	1	16	0	16	0	16	0	0	16.69	1	16	1.06421e-05	16	2.12841e-05	16	1.33026e-06	1.34268e-06
	16.2	1	17	0	17	0	17	0	0	16.2	1	17	1.13142e-05	17	2.26285e-05	17	1.33109e-06	1.34435e-06
	14.81	1	18	0	18	0	18	0	0	14.81	1	18	1.19873e-05	18	2.39745e-05	18	1.33192e-06	1.34602e-06
	12.59	1	19	0	19	0	19	0	0	12.59	1	19	1.26611e-05	19	2.53222e-05	19	1.33275e-06	1.34769e-06
	12.49	1	20	0	20	0	20	0	0	12.49	1	20	1.33358e-05	20	2.66716e-05	20	1.33358e-06	1.34936e-06
	12.12	1	21	0	21	0	21	0	0	12.12	1	21	1.40113e-05	21	2.80226e-05	21	1.33441e-06	1.35104e-06
	11.73	1	22	0	22	0	22	0	0	11.73	1	22	1.46877e-05	22	2.93753e-05	22	1.33524e-06	1.35271e-06
	11.64	1	23	0	23	0	23	0	0	11.64	1	23	1.53648e-05	23	3.07297e-05	23	1.33607e-06	1.35439e-06
	10.62	1	24	0	24	0	24	0	0	10.62	1	24	1.60429e-05	24	3.20858e-05	24	1.33691e-06	1.35607e-06
	10	1	25	0	25	0	25	0	0	10	1	25	1.67218e-05	25	3.34435e-05	25	1.33774e-06	1.35775e-06
	9.96	1	26	0	26	0	26	0	0	9.96	1	26	1.74015e-05	26	3.48029e-05	26	1.33857e-06	1.35943e-06
	9.03	1	27	0	27	0	27	0	0	9.03	1	27	1.8082e-05	27	3.6164e-05	27	1.33941e-06	1.36111e-06
	8.74	1	28	0	28	0	28	0	0	8.74	1	28	1.87634e-05	28	3.75268e-05	28	1.34024e-06	1.3628e-06
	8.48	1	29	0	29	0	29	0	0	8.48	1	29	1.94457e-05	29	3.88913e-05	29	1.34108e-06	1.36449e-06
	8.17	1	30	0	30	0	30	0	0	8.17	1	30	2.01288e-05	30	4.02575e-05	30	1.34192e-06	1.36618e-06
	6.49	1	31	0	31	0	31	0	0	6.49	1	31	2.08127e-05	31	4.16254e-05	31	1.34275e-06	1.36787e-06
	6.4	1	32	0	32	0	32	0	0	6.4	1	32	2.14975e-05	32	4.29949e-05	32	1.34359e-06	1.36956e-06
	6.25	0.999999	33	0	33	0	33	0	0	6.25	0.999999	33	2.21831e-05	33	4.43662e-05	33	1.34443e-06	1.37126e-06
	6.21	0.999999	34	0	34	0	34	0	0	6.21	0.999999	34	2.28696e-05	34	4.57392e-05	34	1.34527e-06	1.37295e-06
	6.16	0.999999	35	0	35	0	35	0	0	6.16	0.999999	35	2.35569e-05	35	4.71138e-05	35	1.34611e-06	1.37465e-06
	6	0.999999	37	0	37	0	37	0	0	6	0.999999	36	2.42451e-05	36	4.84902e-05	36	1.34695e-06	1.3772e-06
	5.73	0.999998	38	0	38	0	38	0	0	6	0.999999	37	2.49341e-05	37	4.98682e-05	37	1.34779e-06	1.3772e-06
	5.63	0.999998	39	0	39	0	39	0	0	5.73	0.999998	38	2.5624e-05	37.9999	5.1248e-05	38	1.34863e-06	1.37976e-06
	5.28	0.999995	40	0	40	0	40	0	0	5.63	0.999998	39	2.63147e-05	38.9999	5.26294e-05	39	1.34947e-06	1.38146e-06
	4.8	0.999984	41	0	41	0	41	0	0	5.28	0.999995	40	2.70063e-05	39.9999	5.40126e-05	40	1.35031e-06	1.38317e-06
	4.71	0.999981	42	0	42	0	42	0	0	4.8	0.999984	41	2.76987e-05	40.9999	5.53975e-05	41	1.35116e-06	1.38488e-06
	4.04	0.999909	43	0	43	0	43	0	0	4.71	0.999981	42	2.8392e-05	41.9999	5.67841e-05	42	1.352e-06	1.38659e-06
	4	0.9999	44	0	44	0	44	0	0	4.04	0.999909	43	2.90862e-05	42.9999	5.81724e-05	43	1.35285e-06	1.3883e-06
	3.92	0.99988	45	0	45	0	45	0	0	4	0.9999	44	2.97812e-05	43.9999	5.95624e-05	44	1.35369e-06	1.39001e-06
	2.62	0.997601	46	0	46	0	46	0	0	3.92	0.99988	45	3.0477e-05	44.9999	6.09541e-05	45	1.35454e-06	1.39173e-06
	2.39	0.995926	47	0	47	0	47	0	0	2.62	0.997601	46	3.11738e-05	45.9999	6.23475e-05	46	1.35538e-06	1.39345e-06
	2.19	0.993543	48	0	48	0	48	0	0	2.39	0.995926	47	3.18714e-05	46.9999	6.37427e-05	47	1.35623e-06	1.39517e-06
	2.07	0.991489	49	0	49	0	49	0	0	2.19	0.993543	48	3.25698e-05	47.9999	6.51396e-05	48	1.35708e-06	1.39689e-06
	2.03	0.990667	50	0	50	0	50	0	0	2.07	0.991489	49	3.32691e-05	48.9999	6.65382e-05	49	1.35792e-06	1.39861e-06
	2.02	0.99045	51	0	51	0	51	0	0	2.03	0.990667	50	3.39693e-05	49.9999	6.79385e-05	50	1.35877e-06	1.40034e-06
	2.01	0.990228	54	0	54	0	54	0	0	2.02	0.99045	51	3.46703e-05	50.9999	6.93406e-05	51	1.35962e-06	1.40206e-06
	2	0.99	63	0	63	0	63	0	0	2.01	0.990228	52	3.53722e-05	51.9999	7.07444e-05	52	1.36047e-06	1.40552e-06
	1.77	0.983018	64	0	64	0	64	0	0	2.01	0.990228	53	3.6075e-05	52.9999	7.21499e-05	53	1.36132e-06	1.40552e-06
	1.6	0.974881	65	0	65	0	65	0	0	2.01	0.990228	54	3.67786e-05	53.9999	7.35572e-05	54	1.36217e-06	1.40552e-06
	1.57	0.973085	66	0	66	0	66	0	0	2	0.99	55	3.74831e-05	54.9999	7.49662e-05	55	1.36302e-06	1.41594e-06
	1.53	0.970488	67	0	67	0	67	0	0	2	0.99	56	3.81884e-05	55.9999	7.63769e-05	56	1.36387e-06	1.41594e-06
	1.16	0.930817	68	0	68	0	68	0	0	2	0.99	57	3.88947e-05	56.9999	7.77894e-05	57	1.36473e-06	1.41594e-06
	1.15	0.929205	68	1	67	2	69	0.0289855	0.0289855	2	0.99	58	3.96018e-05	57.9999	7.92035e-05	58	1.36558e-06	1.41594e-06
	1.01	0.902276	68	2	66	4	70	0.0571429	0.0487805	2	0.99	59	4.03097e-05	58.9999	8.06195e-05	59	1.36643e-06	1.41594e-06
	0.91	0.876973	69	2	67	4	71	0.056338	0.0487805	2	0.99	60	4.10186e-05	59.9999	8.20372e-05	60	1.36729e-06	1.41594e-06
	0.78	0.834041	70	2	68	4	72	0.0555556	0.0487805	2	0.99	61	4.17283e-05	60.9999	8.34566e-05	61	1.36814e-06	1.41594e-06
	0.69	0.795826	71	2	69	4	73	0.0547945	0.0487805	2	0.99	62	4.24389e-05	61.9999	8.48778e-05	62	1.369e-06	1.41594e-06
	0.54	0.711597	72	2	70	4	74	0.0540541	0.0487805	2	0.99	63	4.31503e-05	62.9999	8.63007e-05	63	1.36985e-06	1.41594e-06
	0.52	0.698005	73	2	71	4	75	0.0533333	0.0487805	1.77	0.983018	64	4.38627e-05	63.9999	8.77254e-05	64	1.37071e-06	1.42467e-06
	0.5	0.683772	74	2	72	4	76	0.0526316	0.0487805	1.6	0.974881	65	4.45759e-05	64.9999	8.91518e-05	65	1.37157e-06	1.42642e-06
	0.47	0.661156	75	2	73	4	77	0.0519481	0.0487805	1.57	0.973085	66	4.529e-05	65.9999	9.058e-05	66	1.37242e-06	1.42818e-06
	0.32	0.52137	76	2	74	4	78	0.0512821	0.0487805	1.53	0.970488	67	4.60049e-05	66.9999	9.20099e-05	67	1.37328e-06	1.42993e-06
	0.3	0.498813	77	2	75	4	79	0.0506329	0.0487805	1.16	0.930817	68	4.74503e-05	67.9999	9.49006e-05	68	1.3956e-06	1.43169e-06
	0.26	0.450459	79	2	77	4	81	0.0493827	0.0487805	1.15	0.929205	68.8824	0.117617	68.7648	0.235234	69	0.00340918	0.294135
	0.23	0.411156	80	2	78	4	82	0.0487805	0.0487805	1.01	0.902276	69.7268	0.273236	69.4535	0.546473	70	0.00780676	0.311222
	0.21	0.383405	80	3	77	6	83	0.0722892	0.0705882	0.91	0.876973	70.5624	0.437609	70.1248	0.875217	71	0.012327	0.328727
	0.19	0.354346	81	3	78	6	84	0.0714286	0.0705882	0.78	0.834041	71.3891	0.610937	70.7781	1.22187	72	0.0169705	0.34664
	0.16	0.308169	82	3	79	6	85	0.0705882	0.0705882	0.69	0.795826	72.2066	0.793418	71.4132	1.58684	73	0.0217375	0.364947
	0.15	0.292054	82	4	78	8	86	0.0930233	0.091954	0.54	0.711597	73.0148	0.985243	72.0295	1.97049	74	0.0266282	0.383634
	0.14	0.275564	83	4	79	8	87	0.091954	0.091954	0.52	0.698005	73.8134	1.18659	72.6268	2.37319	75	0.0316425	0.402689
	0.13	0.25869	83	5	78	10	88	0.113636	0.113636	0.5	0.683772	74.6023	1.39765	73.2047	2.7953	76	0.0367803	0.422099
	0.12	0.241422	84	6	78	12	90	0.133333	0.131868	0.47	0.661156	75.3814	1.61858	73.7628	3.23717	77	0.0420411	0.44185
	0.1	0.205672	85	6	79	12	91	0.131868	0.131868	0.32	0.52137	76.1504	1.84955	74.3009	3.69911	78	0.0474244	0.461928
	0.09	0.187169	86	7	79	14	93	0.150538	0.150538	0.3	0.498813	76.9093	2.09072	74.8186	4.18144	79	0.0529296	0.48232
	0.08	0.168236	86	9	77	18	95	0.189474	0.189474	0.26	0.450459	77.6578	2.34223	75.3155	4.68446	80	0.0585558	0.513468
	0.07	0.148862	90	10	80	20	100	0.2	0.2	0.26	0.450459	78.3958	2.60423	75.7915	5.20847	81	0.0643021	0.513468
	0.06	0.129036	91	13	78	26	104	0.25	0.25	0.23	0.411156	79.1231	2.87687	76.2463	5.75373	82	0.0701674	1
	0.05	0.108749	92	14	78	28	106	0.264151	0.264151	0.21	0.383405	79.8397	3.16025	76.6795	6.32051	83	0.0761507	1
										0.19	0.354346	80.5455	3.45452	77.091	6.90905	84	0.0822506	1
										0.16	0.308169	81.2402	3.7598	77.4804	7.51959	85	0.0884658	1
										0.15	0.292054	81.9238	4.07618	77.8476	8.15236	86	0.0947949	1
										0.14	0.275564	82.5962	4.40378	78.1924	8.80757	87	0.101236	1
										0.13	0.25869	83.2573	4.74271	78.5146	9.48541	88	0.107789	1
										0.12	0.241422	83.907	5.09304	78.8139	10.1861	89	0.11445	1
										0.12	0.241422	84.5451	5.45487	79.0903	10.9097	90	0.121219	1
										0.1	0.205672	85.1717	5.82829	79.3434	11.6566	91	0.128094	1
										0.09	0.187169	85.7866	6.21336	79.5733	12.4267	92	0.135073	1
										0.09	0.187169	86.3898	6.61017	79.7797	13.2203	93	0.142154	1
										0.08	0.168236	86.9812	7.01878	79.9624	14.0376	94	0.149336	1
										0.08	0.168236	87.5608	7.43924	80.1215	14.8785	95	0.156616	1
										0.07	0.148862	88.1284	7.87162	80.2568	15.7432	96	0.163992	1
										0.07	0.148862	88.684	8.31597	80.3681	16.6319	97	0.171463	1
										0.07	0.148862	89.2277	8.77233	80.4553	17.5447	98	0.179027	1
										0.07	0.148862	89.7593	9.24074	80.5185	18.4815	99	0.186682	1
										0.07	0.148862	90.2787	9.72125	80.5575	19.4425	100	0.194425	1
										0.06	0.129036	90.7861	10.2139	80.5722	20.4278	101	0.202255	1
										0.06	0.129036	91.2813	10.7187	80.5626	21.4374	102	0.21017	1
										0.06	0.129036	91.7644	11.2356	80.5287	22.4713	103	0.218168	1
										0.06	0.129036	92.2352	11.7648	80.4704	23.5296	104	0.226247	1
										0.05	0.108749	92.6938	12.3062	80.3876	24.6124	105	0.234404	1
										0.05	0.108749	93.1402	12.8598	80.2803	25.7197	106	0.242638	1

## Sheet: Distinct Peptide Level Data
Distinct Peptide Level Data		Confidence Threshold	Forward	Reverse	Correct	Incorrect	Total	Global FDR	q-value		Fit Confidence Threshold	Fit Forward	Fit Reverse	Fit Correct	Fit Incorrect	Fit Total	Fit Global FDR	Fit Local FDR
		1	203	0	203	0	203	0	0		1	0.999694	0.000306371	0.999387	0.000612742	1	0.000612742	0.000617205
		0.9999	270	0	270	0	270	0	0		1	1.99939	0.000612754	1.99877	0.00122551	2	0.000612754	0.000617205
		0.9998	308	0	308	0	308	0	0		1	2.99908	0.000919147	2.99816	0.00183829	3	0.000612765	0.000617205
		0.9997	415	0	415	0	415	0	0		1	3.99877	0.00122555	3.99755	0.0024511	4	0.000612776	0.000617205
		0.9996	421	0	421	0	421	0	0		1	4.99847	0.00153197	4.99694	0.00306394	5	0.000612787	0.000617205
		0.9995	423	0	423	0	423	0	0		1	5.99816	0.0018384	5.99632	0.00367679	6	0.000612798	0.000617205
		0.9994	454	0	454	0	454	0	0		1	6.99786	0.00214483	6.99571	0.00428967	7	0.00061281	0.000617205
		0.9993	513	0	513	0	513	0	0		1	7.99755	0.00245128	7.9951	0.00490257	8	0.000612821	0.000617205
		0.9992	518	0	518	0	518	0	0		1	8.99724	0.00275774	8.99448	0.00551549	9	0.000612832	0.000617205
		0.9991	519	1	518	2	520	0.00384615	0.00280505		1	9.99694	0.00306422	9.99387	0.00612843	10	0.000612843	0.000617205
		0.999	551	1	550	2	552	0.00362319	0.00280505		1	10.9966	0.0033707	10.9933	0.0067414	11	0.000612854	0.000617205
		0.9989	574	1	573	2	575	0.00347826	0.00280505		1	11.9963	0.00367719	11.9926	0.00735439	12	0.000612866	0.000617205
		0.9988	587	1	586	2	588	0.00340136	0.00280505		1	12.996	0.0039837	12.992	0.0079674	13	0.000612877	0.000617205
		0.9987	602	1	601	2	603	0.00331675	0.00280505		1	13.9957	0.00429022	13.9914	0.00858043	14	0.000612888	0.000617205
		0.9986	611	1	610	2	612	0.00326797	0.00280505		1	14.9954	0.00459674	14.9908	0.00919349	15	0.000612899	0.000617205
		0.9985	630	1	629	2	631	0.00316957	0.00280505		1	15.9951	0.00490328	15.9902	0.00980657	16	0.000612911	0.000617205
		0.9984	637	1	636	2	638	0.0031348	0.00280505		1	16.9948	0.00520983	16.9896	0.0104197	17	0.000612922	0.000617205
		0.9983	639	1	638	2	640	0.003125	0.00280505		1	17.9945	0.0055164	17.989	0.0110328	18	0.000612933	0.000617205
		0.9982	640	1	639	2	641	0.00312012	0.00280505		1	18.9942	0.00582297	18.9884	0.0116459	19	0.000612944	0.000617205
		0.9981	641	1	640	2	642	0.00311526	0.00280505		1	19.9939	0.00612955	19.9877	0.0122591	20	0.000612955	0.000617205
		0.998	645	1	644	2	646	0.00309598	0.00280505		1	20.9936	0.00643615	20.9871	0.0128723	21	0.000612967	0.000617205
		0.9979	646	1	645	2	647	0.00309119	0.00280505		1	21.9933	0.00674276	21.9865	0.0134855	22	0.000612978	0.000617205
		0.9977	662	1	661	2	663	0.00301659	0.00280505		1	22.993	0.00704937	22.9859	0.0140987	23	0.000612989	0.000617205
		0.9976	663	1	662	2	664	0.00301205	0.00280505		1	23.9926	0.007356	23.9853	0.014712	24	0.000613	0.000617205
		0.9975	667	1	666	2	668	0.00299401	0.00280505		1	24.9923	0.00766264	24.9847	0.0153253	25	0.000613011	0.000617205
		0.9974	668	1	667	2	669	0.00298954	0.00280505		1	25.992	0.00796929	25.9841	0.0159386	26	0.000613023	0.000617205
		0.9973	670	1	669	2	671	0.00298063	0.00280505		1	26.9917	0.00827596	26.9834	0.0165519	27	0.000613034	0.000617205
		0.9972	671	1	670	2	672	0.00297619	0.00280505		1	27.9914	0.00858263	27.9828	0.0171653	28	0.000613045	0.000617205
		0.9971	672	1	671	2	673	0.00297177	0.00280505		1	28.9911	0.00888931	28.9822	0.0177786	29	0.000613056	0.000617205
		0.9969	674	1	673	2	675	0.00296296	0.00280505		1	29.9908	0.00919601	29.9816	0.018392	30	0.000613067	0.000617205
		0.9968	676	1	675	2	677	0.00295421	0.00280505		1	30.9905	0.00950272	30.981	0.0190054	31	0.000613079	0.000617205
		0.9967	677	1	676	2	678	0.00294985	0.00280505		1	31.9902	0.00980944	31.9804	0.0196189	32	0.00061309	0.000617205
		0.9966	678	1	677	2	679	0.00294551	0.00280505		1	32.9899	0.0101162	32.9798	0.0202323	33	0.000613101	0.000617205
		0.9965	679	1	678	2	680	0.00294118	0.00280505		1	33.9896	0.0104229	33.9792	0.0208458	34	0.000613112	0.000617205
		0.9964	680	1	679	2	681	0.00293686	0.00280505		1	34.9893	0.0107297	34.9785	0.0214593	35	0.000613123	0.000617205
		0.9963	682	1	681	2	683	0.00292826	0.00280505		1	35.989	0.0110364	35.9779	0.0220728	36	0.000613135	0.000617205
		0.9962	683	1	682	2	684	0.00292398	0.00280505		1	36.9887	0.0113432	36.9773	0.0226864	37	0.000613146	0.000617205
		0.9961	685	1	684	2	686	0.00291545	0.00280505		1	37.9884	0.01165	37.9767	0.0233	38	0.000613157	0.000617205
		0.996	688	1	687	2	689	0.00290276	0.00280505		1	38.988	0.0119568	38.9761	0.0239136	39	0.000613168	0.000617205
		0.9959	695	1	694	2	696	0.00287356	0.00280505		1	39.9877	0.0122636	39.9755	0.0245272	40	0.000613179	0.000617205
		0.9958	697	1	696	2	698	0.00286533	0.00280505		1	40.9874	0.0125704	40.9749	0.0251408	41	0.000613191	0.000617205
		0.9957	699	1	698	2	700	0.00285714	0.00280505		1	41.9871	0.0128772	41.9742	0.0257545	42	0.000613202	0.000617205
		0.9954	701	1	700	2	702	0.002849	0.00280505		1	42.9868	0.0131841	42.9736	0.0263682	43	0.000613213	0.000617205
		0.9953	710	1	709	2	711	0.00281294	0.00280505		1	43.9865	0.0134909	43.973	0.0269819	44	0.000613224	0.000617205
		0.9952	712	1	711	2	713	0.00280505	0.00280505		1	44.9862	0.0137978	44.9724	0.0275956	45	0.000613236	0.000617205
		0.9951	713	2	711	4	715	0.00559441	0.00426439		1	45.9859	0.0141047	45.9718	0.0282094	46	0.000613247	0.000617205
		0.995	714	2	712	4	716	0.00558659	0.00426439		1	46.9856	0.0144116	46.9712	0.0288231	47	0.000613258	0.000617205
		0.9949	717	2	715	4	719	0.00556328	0.00426439		1	47.9853	0.0147185	47.9706	0.0294369	48	0.000613269	0.000617205
		0.9948	718	2	716	4	720	0.00555556	0.00426439		1	48.985	0.0150254	48.9699	0.0300507	49	0.00061328	0.000617205
		0.9947	721	2	719	4	723	0.0055325	0.00426439		1	49.9847	0.0153323	49.9693	0.0306646	50	0.000613292	0.000617205
		0.9946	722	2	720	4	724	0.00552486	0.00426439		1	50.9844	0.0156392	50.9687	0.0312784	51	0.000613303	0.000617205
		0.9945	723	2	721	4	725	0.00551724	0.00426439		1	51.9841	0.0159462	51.9681	0.0318923	52	0.000613314	0.000617205
		0.9943	725	2	723	4	727	0.00550206	0.00426439		1	52.9837	0.0162531	52.9675	0.0325062	53	0.000613325	0.000617205
		0.9941	732	2	730	4	734	0.00544959	0.00426439		1	53.9834	0.0165601	53.9669	0.0331202	54	0.000613336	0.000617205
		0.994	734	2	732	4	736	0.00543478	0.00426439		1	54.9831	0.0168671	54.9663	0.0337341	55	0.000613348	0.000617205
		0.9938	736	2	734	4	738	0.00542005	0.00426439		1	55.9828	0.0171741	55.9657	0.0343481	56	0.000613359	0.000617205
		0.9937	737	2	735	4	739	0.00541272	0.00426439		1	56.9825	0.0174811	56.965	0.0349621	57	0.00061337	0.000617205
		0.9936	739	2	737	4	741	0.00539811	0.00426439		1	57.9822	0.0177881	57.9644	0.0355761	58	0.000613381	0.000617205
		0.9935	740	2	738	4	742	0.00539084	0.00426439		1	58.9819	0.0180951	58.9638	0.0361902	59	0.000613393	0.000617205
		0.9934	741	2	739	4	743	0.00538358	0.00426439		1	59.9816	0.0184021	59.9632	0.0368042	60	0.000613404	0.000617205
		0.9931	742	2	740	4	744	0.00537634	0.00426439		1	60.9813	0.0187092	60.9626	0.0374183	61	0.000613415	0.000617205
		0.993	744	2	742	4	746	0.00536193	0.00426439		1	61.981	0.0190162	61.962	0.0380324	62	0.000613426	0.000617205
		0.9928	745	2	743	4	747	0.00535475	0.00426439		1	62.9807	0.0193233	62.9614	0.0386466	63	0.000613438	0.000617205
		0.9926	746	2	744	4	748	0.00534759	0.00426439		1	63.9804	0.0196304	63.9607	0.0392607	64	0.000613449	0.000617205
		0.9925	752	2	750	4	754	0.00530504	0.00426439		1	64.9801	0.0199375	64.9601	0.0398749	65	0.000613461	0.000617205
		0.9924	758	2	756	4	760	0.00526316	0.00426439		1	65.9798	0.0202446	65.9595	0.0404891	66	0.000613472	0.000617205
		0.9923	760	2	758	4	762	0.00524934	0.00426439		1	66.9794	0.0205517	66.9589	0.0411034	67	0.000613483	0.000617205
		0.9922	762	2	760	4	764	0.0052356	0.00426439		1	67.9791	0.0208588	67.9583	0.0417177	68	0.000613495	0.000617205
		0.9921	763	2	761	4	765	0.00522876	0.00426439		1	68.9788	0.021166	68.9577	0.0423319	69	0.000613506	0.000617205
		0.992	765	2	763	4	767	0.00521512	0.00426439		1	69.9785	0.0214731	69.9571	0.0429463	70	0.000613518	0.000617205
		0.9919	767	2	765	4	769	0.00520156	0.00426439		1	70.9782	0.0217803	70.9564	0.0435606	71	0.00061353	0.000617205
		0.9918	768	2	766	4	770	0.00519481	0.00426439		1	71.9779	0.0220875	71.9558	0.044175	72	0.000613542	0.000617205
		0.9917	782	2	780	4	784	0.00510204	0.00426439		1	72.9776	0.0223947	72.9552	0.0447894	73	0.000613553	0.000617205
		0.9916	783	2	781	4	785	0.00509554	0.00426439		1	73.9773	0.0227019	73.9546	0.0454038	74	0.000613565	0.000617205
		0.9913	785	2	783	4	787	0.00508259	0.00426439		1	74.977	0.0230092	74.954	0.0460183	75	0.000613578	0.000617205
		0.9911	786	2	784	4	788	0.00507614	0.00426439		1	75.9767	0.0233164	75.9534	0.0466328	76	0.00061359	0.000617205
		0.991	788	2	786	4	790	0.00506329	0.00426439		1	76.9764	0.0236237	76.9528	0.0472474	77	0.000613602	0.000617205
		0.9909	797	2	795	4	799	0.00500626	0.00426439		1	77.9761	0.023931	77.9521	0.047862	78	0.000613615	0.000617205
		0.9908	798	2	796	4	800	0.005	0.00426439		1	78.9758	0.0242383	78.9515	0.0484766	79	0.000613628	0.000617205
		0.9907	799	2	797	4	801	0.00499376	0.00426439		1	79.9755	0.0245457	79.9509	0.0490913	80	0.000613641	0.000617205
		0.9906	836	2	834	4	838	0.00477327	0.00426439		1	80.9751	0.024853	80.9503	0.049706	81	0.000613655	0.000617205
		0.9901	837	2	835	4	839	0.00476758	0.00426439		1	81.9748	0.0251604	81.9497	0.0503208	82	0.000613669	0.000617205
		0.9899	846	2	844	4	848	0.00471698	0.00426439		1	82.9745	0.0254678	82.9491	0.0509357	83	0.000613683	0.000617205
		0.9898	847	2	845	4	849	0.00471143	0.00426439		1	83.9742	0.0257753	83.9484	0.0515506	84	0.000613697	0.000617205
		0.9896	848	2	846	4	850	0.00470588	0.00426439		1	84.9739	0.0260828	84.9478	0.0521655	85	0.000613712	0.000617205
		0.9895	849	2	847	4	851	0.00470035	0.00426439		1	85.9736	0.0263903	85.9472	0.0527806	86	0.000613728	0.000617205
		0.9892	850	2	848	4	852	0.00469484	0.00426439		1	86.9733	0.0266978	86.9466	0.0533957	87	0.000613744	0.000617205
		0.9888	851	2	849	4	853	0.00468933	0.00426439		1	87.973	0.0270054	87.946	0.0540109	88	0.00061376	0.000617205
		0.9885	855	2	853	4	857	0.00466744	0.00426439		1	88.9727	0.0273131	88.9454	0.0546262	89	0.000613777	0.000617205
		0.9881	856	2	854	4	858	0.004662	0.00426439		1	89.9724	0.0276208	89.9448	0.0552415	90	0.000613795	0.000617205
		0.9877	857	2	855	4	859	0.00465658	0.00426439		1	90.9721	0.0279285	90.9441	0.055857	91	0.000613813	0.000617205
		0.9874	858	2	856	4	860	0.00465116	0.00426439		1	91.9718	0.0282363	91.9435	0.0564726	92	0.000613833	0.000617205
		0.9873	859	2	857	4	861	0.00464576	0.00426439		1	92.9715	0.0285442	92.9429	0.0570883	93	0.000613853	0.000617205
		0.9872	860	2	858	4	862	0.00464037	0.00426439		1	93.9711	0.0288521	93.9423	0.0577041	94	0.000613874	0.000617205
		0.9868	861	2	859	4	863	0.00463499	0.00426439		1	94.9708	0.0291601	94.9417	0.0583201	95	0.000613896	0.000617205
		0.9867	862	2	860	4	864	0.00462963	0.00426439		1	95.9705	0.0294681	95.9411	0.0589362	96	0.000613919	0.000617205
		0.9853	863	2	861	4	865	0.00462428	0.00426439		1	96.9702	0.0297762	96.9404	0.0595525	97	0.000613943	0.000617205
		0.9847	864	2	862	4	866	0.00461894	0.00426439		1	97.9699	0.0300844	97.9398	0.0601689	98	0.000613968	0.000617205
		0.9843	865	2	863	4	867	0.00461361	0.00426439		1	98.9696	0.0303928	98.9392	0.0607855	99	0.000613995	0.000617205
		0.9841	866	2	864	4	868	0.00460829	0.00426439		1	99.9693	0.0307011	99.9386	0.0614023	100	0.000614023	0.000617205
		0.984	867	2	865	4	869	0.00460299	0.00426439		1	100.969	0.0310096	100.938	0.0620193	101	0.000614052	0.000617205
		0.9835	868	2	866	4	870	0.0045977	0.00426439		1	101.969	0.0313182	101.937	0.0626365	102	0.000614083	0.000617205
		0.9834	869	2	867	4	871	0.00459242	0.00426439		1	102.968	0.031627	102.937	0.0632539	103	0.000614116	0.000617205
		0.9832	870	2	868	4	872	0.00458716	0.00426439		1	103.968	0.0319358	103.936	0.0638716	104	0.00061415	0.000617205
		0.9831	871	2	869	4	873	0.0045819	0.00426439		1	104.968	0.0322448	104.936	0.0644895	105	0.000614186	0.000617205
		0.983	872	2	870	4	874	0.00457666	0.00426439		1	105.967	0.0325539	105.935	0.0651077	106	0.000614224	0.000617205
		0.9829	873	2	871	4	875	0.00457143	0.00426439		1	106.967	0.0328631	106.934	0.0657262	107	0.000614264	0.000617205
		0.982	874	2	872	4	876	0.00456621	0.00426439		1	107.967	0.0331725	107.934	0.066345	108	0.000614306	0.000617205
		0.9819	875	2	873	4	877	0.004561	0.00426439		1	108.967	0.0334821	108.933	0.0669642	109	0.00061435	0.000617205
		0.9814	876	2	874	4	878	0.00455581	0.00426439		1	109.966	0.0337918	109.932	0.0675836	110	0.000614397	0.000617205
		0.9811	877	2	875	4	879	0.00455063	0.00426439		1	110.966	0.0341017	110.932	0.0682035	111	0.000614446	0.000617205
		0.9804	878	2	876	4	880	0.00454545	0.00426439		1	111.966	0.0344118	111.931	0.0688237	112	0.000614497	0.000617205
		0.9791	879	2	877	4	881	0.0045403	0.00426439		1	112.965	0.0347222	112.931	0.0694443	113	0.000614551	0.000617205
		0.979	880	2	878	4	882	0.00453515	0.00426439		1	113.965	0.0350327	113.93	0.0700654	114	0.000614608	0.000617205
		0.9788	881	2	879	4	883	0.00453001	0.00426439		1	114.965	0.0353434	114.929	0.0706868	115	0.000614668	0.000617205
		0.9787	882	2	880	4	884	0.00452489	0.00426439		1	115.964	0.0356544	115.929	0.0713088	116	0.000614731	0.000617205
		0.9774	885	2	883	4	887	0.00450958	0.00426439		1	116.964	0.0359656	116.928	0.0719312	117	0.000614797	0.000617205
		0.977	889	2	887	4	891	0.00448934	0.00426439		1	117.964	0.0362771	117.927	0.0725542	118	0.000614866	0.000617205
		0.9769	890	2	888	4	892	0.0044843	0.00426439		1	118.963	0.0365889	118.927	0.0731777	119	0.000614939	0.000617205
		0.9761	891	2	889	4	893	0.00447928	0.00426439		1	119.963	0.0369009	119.926	0.0738018	120	0.000615015	0.000617205
		0.976	892	2	890	4	894	0.00447427	0.00426439		1	120.963	0.0372132	120.926	0.0744264	121	0.000615095	0.000617205
		0.9758	893	2	891	4	895	0.00446927	0.00426439		1	121.962	0.0375259	121.925	0.0750517	122	0.000615178	0.000617205
		0.975	895	2	893	4	897	0.00445931	0.00426439		1	122.962	0.0378388	122.924	0.0756776	123	0.000615265	0.000617205
		0.9747	899	2	897	4	901	0.00443951	0.00426439		1	123.962	0.0381521	123.924	0.0763042	124	0.000615357	0.000617205
		0.9745	900	2	898	4	902	0.00443459	0.00426439		1	124.962	0.0384658	124.923	0.0769315	125	0.000615452	0.000617205
		0.9744	901	2	899	4	903	0.00442968	0.00426439		1	125.961	0.0387798	125.922	0.0775595	126	0.000615552	0.000617205
		0.9743	902	2	900	4	904	0.00442478	0.00426439		1	126.961	0.0390942	126.922	0.0781883	127	0.000615656	0.000617205
		0.9742	903	2	901	4	905	0.00441989	0.00426439		1	127.961	0.039409	127.921	0.0788179	128	0.000615765	0.000617205
		0.9741	904	2	902	4	906	0.00441501	0.00426439		1	128.96	0.0397242	128.921	0.0794483	129	0.000615878	0.000617205
		0.9739	907	2	905	4	909	0.00440044	0.00426439		1	129.96	0.0400398	129.92	0.0800795	130	0.000615997	0.000617205
		0.9724	908	2	906	4	910	0.0043956	0.00426439		1	130.96	0.0403558	130.919	0.0807117	131	0.00061612	0.000617205
		0.9722	909	2	907	4	911	0.00439078	0.00426439		1	131.959	0.0406724	131.919	0.0813447	132	0.000616248	0.000617205
		0.9717	910	2	908	4	912	0.00438596	0.00426439		1	132.959	0.0409894	132.918	0.0819787	133	0.000616381	0.000617205
		0.9716	912	2	910	4	914	0.00437637	0.00426439		1	133.959	0.0413069	133.917	0.0826137	134	0.00061652	0.000617205
		0.9715	913	2	911	4	915	0.00437158	0.00426439		1	134.958	0.0416249	134.917	0.0832497	135	0.000616664	0.000617205
		0.9714	915	2	913	4	917	0.00436205	0.00426439		1	135.958	0.0419434	135.916	0.0838868	136	0.000616814	0.000617205
		0.9713	916	2	914	4	918	0.0043573	0.00426439		1	136.958	0.0422624	136.915	0.0845249	137	0.00061697	0.000617205
		0.9697	920	2	918	4	922	0.00433839	0.00426439		1	137.957	0.0425821	137.915	0.0851642	138	0.000617132	0.000617205
		0.9695	922	2	920	4	924	0.004329	0.00426439		1	138.957	0.0429023	138.914	0.0858046	139	0.000617299	0.000617205
		0.9694	924	2	922	4	926	0.00431965	0.00426439		1	139.957	0.0432231	139.914	0.0864462	140	0.000617473	0.000617205
		0.9685	925	2	923	4	927	0.00431499	0.00426439		1	140.956	0.0435445	140.913	0.0870891	141	0.000617653	0.000617205
		0.9684	926	2	924	4	928	0.00431034	0.00426439		1	141.956	0.0438666	141.912	0.0877332	142	0.000617839	0.000617205
		0.9681	927	2	925	4	929	0.00430571	0.00426439		1	142.956	0.0441893	142.912	0.0883786	143	0.000618032	0.000617205
		0.968	928	2	926	4	930	0.00430108	0.00426439		1	143.955	0.0445127	143.911	0.0890254	144	0.000618232	0.000617205
		0.9679	930	2	928	4	932	0.00429185	0.00426439		1	144.955	0.0448368	144.91	0.0896736	145	0.000618438	0.000617205
		0.9678	932	2	930	4	934	0.00428266	0.00426439		1	145.955	0.0451616	145.91	0.0903232	146	0.000618652	0.000617205
		0.9668	933	2	931	4	935	0.00427807	0.00426439		1	146.955	0.0454871	146.909	0.0909742	147	0.000618872	0.000617205
		0.9667	934	2	932	4	936	0.0042735	0.00426439		1	147.954	0.0458134	147.908	0.0916268	148	0.0006191	0.000617205
		0.9658	935	2	933	4	937	0.00426894	0.00426439		1	148.954	0.0461405	148.908	0.0922809	149	0.000619335	0.000617205
		0.9657	936	2	934	4	938	0.00426439	0.00426439		1	149.954	0.0464683	149.907	0.0929366	150	0.000619577	0.000617205
		0.9652	937	3	934	6	940	0.00638298	0.00614125		1	150.953	0.046797	150.906	0.0935939	151	0.000619827	0.000617205
		0.9651	938	3	935	6	941	0.0063762	0.00614125		1	151.953	0.0471265	151.906	0.0942529	152	0.000620085	0.000617205
		0.9649	940	3	937	6	943	0.00636267	0.00614125		1	152.953	0.0474568	152.905	0.0949137	153	0.000620351	0.000617205
		0.9648	941	3	938	6	944	0.00635593	0.00614125		1	153.952	0.0477881	153.904	0.0955761	154	0.000620624	0.000617205
		0.9642	942	3	939	6	945	0.00634921	0.00614125		1	154.952	0.0481202	154.904	0.0962404	155	0.000620906	0.000617205
		0.9639	943	3	940	6	946	0.00634249	0.00614125		1	155.952	0.0484532	155.903	0.0969065	156	0.000621195	0.000617205
		0.9637	945	3	942	6	948	0.00632911	0.00614125		1	156.951	0.0487872	156.902	0.0975744	157	0.000621493	0.000617205
		0.9636	947	3	944	6	950	0.00631579	0.00614125		1	157.951	0.0491222	157.902	0.0982443	158	0.0006218	0.000617205
		0.9625	948	3	945	6	951	0.00630915	0.00614125		1	158.951	0.0494581	158.901	0.0989162	159	0.000622114	0.000617205
		0.9622	949	3	946	6	952	0.00630252	0.00614125		1	159.95	0.049795	159.9	0.09959	160	0.000622438	0.000617205
		0.9619	950	3	947	6	953	0.00629591	0.00614125		1	160.95	0.050133	160.9	0.100266	161	0.00062277	0.000617205
		0.9617	952	3	949	6	955	0.00628272	0.00614125		1	161.95	0.050472	161.899	0.100944	162	0.000623111	0.000617205
		0.9613	953	3	950	6	956	0.00627615	0.00614125		1	162.949	0.0508121	162.898	0.101624	163	0.000623461	0.000617205
		0.9605	954	3	951	6	957	0.00626959	0.00614125		1	163.949	0.0511532	163.898	0.102306	164	0.00062382	0.000617205
		0.9604	955	3	952	6	958	0.00626305	0.00614125		1	164.949	0.0514955	164.897	0.102991	165	0.000624188	0.000617205
		0.9596	956	3	953	6	959	0.00625652	0.00614125		1	165.948	0.0518389	165.896	0.103678	166	0.000624565	0.000617205
		0.9591	957	3	954	6	960	0.00625	0.00614125		1	166.948	0.0521835	166.896	0.104367	167	0.000624952	0.000617205
		0.959	958	3	955	6	961	0.0062435	0.00614125		1	167.947	0.0525293	167.895	0.105059	168	0.000625348	0.000617205
		0.9588	959	3	956	6	962	0.00623701	0.00614125		1	168.947	0.0528762	168.894	0.105752	169	0.000625754	0.000617205
		0.9576	960	3	957	6	963	0.00623053	0.00614125		1	169.947	0.0532244	169.894	0.106449	170	0.000626169	0.000617205
		0.9572	961	3	958	6	964	0.00622407	0.00614125		1	170.946	0.0535738	170.893	0.107148	171	0.000626595	0.000617205
		0.9563	962	3	959	6	965	0.00621762	0.00614125		1	171.946	0.0539245	171.892	0.107849	172	0.000627029	0.000617205
		0.956	963	3	960	6	966	0.00621118	0.00614125		1	172.946	0.0542765	172.891	0.108553	173	0.000627474	0.000617205
		0.9559	964	3	961	6	967	0.00620476	0.00614125		1	173.945	0.0546298	173.891	0.10926	174	0.000627929	0.000617205
		0.955	965	3	962	6	968	0.00619835	0.00614125		1	174.945	0.0549845	174.89	0.109969	175	0.000628394	0.000617205
		0.9534	966	3	963	6	969	0.00619195	0.00614125		1	175.945	0.0553405	175.889	0.110681	176	0.000628869	0.000617205
		0.9532	967	3	964	6	970	0.00618557	0.00614125		1	176.944	0.0556978	176.889	0.111396	177	0.000629354	0.000617205
		0.9529	971	3	968	6	974	0.00616016	0.00614125		1	177.944	0.0560566	177.888	0.112113	178	0.00062985	0.000617205
		0.9528	972	3	969	6	975	0.00615385	0.00614125		1	178.944	0.0564168	178.887	0.112834	179	0.000630356	0.000617205
		0.9525	973	3	970	6	976	0.00614754	0.00614125		1	179.943	0.0567785	179.886	0.113557	180	0.000630872	0.000617205
		0.9524	974	3	971	6	977	0.00614125	0.00614125		1	180.943	0.0571416	180.886	0.114283	181	0.000631399	0.000617205
		0.9515	974	4	970	8	978	0.00817996	0.00816327		1	181.942	0.0575062	181.885	0.115012	182	0.000631937	0.000617205
		0.9514	976	4	972	8	980	0.00816327	0.00816327		1	182.942	0.0578724	182.884	0.115745	183	0.000632485	0.000617205
		0.951	976	5	971	10	981	0.0101937	0.01		1	183.942	0.05824	183.884	0.11648	184	0.000633044	0.000617205
		0.9509	977	5	972	10	982	0.0101833	0.01		1	184.941	0.0586093	184.883	0.117219	185	0.000633614	0.000617205
		0.9507	978	5	973	10	983	0.0101729	0.01		1	185.941	0.0589801	185.882	0.11796	186	0.000634194	0.000617205
		0.95	979	5	974	10	984	0.0101626	0.01		1	186.941	0.0593525	186.881	0.118705	187	0.000634786	0.000617205
		0.9485	980	5	975	10	985	0.0101523	0.01		1	187.94	0.0597265	187.881	0.119453	188	0.000635389	0.000617205
		0.9482	981	5	976	10	986	0.010142	0.01		1	188.94	0.0601022	188.88	0.120204	189	0.000636002	0.000617205
		0.9481	982	5	977	10	987	0.0101317	0.01		1	189.94	0.0604796	189.879	0.120959	190	0.000636627	0.000617205
		0.9472	984	5	979	10	989	0.0101112	0.01		1	190.939	0.0608587	190.878	0.121717	191	0.000637263	0.000617205
		0.9471	985	5	980	10	990	0.010101	0.01		1	191.939	0.0612394	191.878	0.122479	192	0.000637911	0.000617205
		0.9467	986	5	981	10	991	0.0100908	0.01		1	192.938	0.0616219	192.877	0.123244	193	0.000638569	0.000617205
		0.9465	987	5	982	10	992	0.0100806	0.01		1	193.938	0.0620062	193.876	0.124012	194	0.000639239	0.000617205
		0.9453	988	5	983	10	993	0.0100705	0.01		1	194.938	0.0623922	194.875	0.124784	195	0.00063992	0.000617205
		0.9452	989	5	984	10	994	0.0100604	0.01		1	195.937	0.0627801	195.874	0.12556	196	0.000640613	0.000617205
		0.945	990	5	985	10	995	0.0100503	0.01		1	196.937	0.0631698	196.874	0.12634	197	0.000641317	0.000617205
		0.9439	991	5	986	10	996	0.0100402	0.01		1	197.936	0.0635613	197.873	0.127123	198	0.000642033	0.000617205
		0.9426	992	5	987	10	997	0.0100301	0.01		1	198.936	0.0639547	198.872	0.127909	199	0.00064276	0.000617205
		0.9419	993	5	988	10	998	0.01002	0.01		1	199.936	0.0643499	199.871	0.1287	200	0.000643499	0.000617205
		0.9414	994	5	989	10	999	0.01001	0.01		1	200.935	0.0647471	200.871	0.129494	201	0.00064425	0.000617205
		0.9405	995	5	990	10	1000	0.01	0.01		1	201.935	0.0651462	201.87	0.130292	202	0.000645012	0.000617205
		0.9398	995	6	989	12	1001	0.011988	0.0118577		1	202.934	0.0655473	202.869	0.131095	203	0.000645786	0.000617205
		0.9391	996	6	990	12	1002	0.011976	0.0118577		0.9999	203.934	0.0659503	203.868	0.131901	204	0.000646572	0.000958999
		0.9389	997	6	991	12	1003	0.0119641	0.0118577		0.9999	204.934	0.0663554	204.867	0.132711	205	0.000647369	0.000958999
		0.9383	998	6	992	12	1004	0.0119522	0.0118577		0.9999	205.933	0.0667624	205.866	0.133525	206	0.000648179	0.000958999
		0.9371	1000	6	994	12	1006	0.0119284	0.0118577		0.9999	206.933	0.0671715	206.866	0.134343	207	0.000649	0.000958999
		0.9354	1001	6	995	12	1007	0.0119166	0.0118577		0.9999	207.932	0.0675826	207.865	0.135165	208	0.000649833	0.000958999
		0.9351	1003	6	997	12	1009	0.011893	0.0118577		0.9999	208.932	0.0679959	208.864	0.135992	209	0.000650678	0.000958999
		0.9345	1004	6	998	12	1010	0.0118812	0.0118577		0.9999	209.932	0.0684112	209.863	0.136822	210	0.000651535	0.000958999
		0.9335	1005	6	999	12	1011	0.0118694	0.0118577		0.9999	210.931	0.0688286	210.862	0.137657	211	0.000652404	0.000958999
		0.933	1006	6	1000	12	1012	0.0118577	0.0118577		0.9999	211.931	0.0692482	211.862	0.138496	212	0.000653285	0.000958999
		0.9328	1006	7	999	14	1013	0.0138203	0.0136187		0.9999	212.93	0.0696699	212.861	0.13934	213	0.000654178	0.000958999
		0.9327	1007	7	1000	14	1014	0.0138067	0.0136187		0.9999	213.93	0.0700939	213.86	0.140188	214	0.000655083	0.000958999
		0.9323	1009	7	1002	14	1016	0.0137795	0.0136187		0.9999	214.929	0.07052	214.859	0.14104	215	0.000656	0.000958999
		0.9305	1010	7	1003	14	1017	0.013766	0.0136187		0.9999	215.929	0.0709483	215.858	0.141897	216	0.000656929	0.000958999
		0.93	1011	7	1004	14	1018	0.0137525	0.0136187		0.9999	216.929	0.0713789	216.857	0.142758	217	0.00065787	0.000958999
		0.9294	1012	7	1005	14	1019	0.013739	0.0136187		0.9999	217.928	0.0718118	217.856	0.143624	218	0.000658824	0.000958999
		0.9277	1013	7	1006	14	1020	0.0137255	0.0136187		0.9999	218.928	0.0722469	218.856	0.144494	219	0.000659789	0.000958999
		0.9269	1014	7	1007	14	1021	0.013712	0.0136187		0.9999	219.927	0.0726843	219.855	0.145369	220	0.000660767	0.000958999
		0.9262	1015	7	1008	14	1022	0.0136986	0.0136187		0.9999	220.927	0.0731241	220.854	0.146248	221	0.000661756	0.000958999
		0.9255	1017	7	1010	14	1024	0.0136719	0.0136187		0.9999	221.926	0.0735662	221.853	0.147132	222	0.000662758	0.000958999
		0.9219	1018	7	1011	14	1025	0.0136585	0.0136187		0.9999	222.926	0.0740106	222.852	0.148021	223	0.000663772	0.000958999
		0.921	1020	7	1013	14	1027	0.0136319	0.0136187		0.9999	223.926	0.0744575	223.851	0.148915	224	0.000664799	0.000958999
		0.9203	1021	7	1014	14	1028	0.0136187	0.0136187		0.9999	224.925	0.0749067	224.85	0.149813	225	0.000665837	0.000958999
		0.9178	1021	8	1013	16	1029	0.0155491	0.0146654		0.9999	225.925	0.0753583	225.849	0.150717	226	0.000666888	0.000958999
		0.9166	1022	8	1014	16	1030	0.015534	0.0146654		0.9999	226.924	0.0758124	226.848	0.151625	227	0.000667951	0.000958999
		0.9164	1024	8	1016	16	1032	0.0155039	0.0146654		0.9999	227.924	0.076269	227.847	0.152538	228	0.000669026	0.000958999
		0.9163	1025	8	1017	16	1033	0.0154889	0.0146654		0.9999	228.923	0.076728	228.847	0.153456	229	0.000670113	0.000958999
		0.9162	1026	8	1018	16	1034	0.0154739	0.0146654		0.9999	229.923	0.0771895	229.846	0.154379	230	0.000671213	0.000958999
		0.9154	1027	8	1019	16	1035	0.0154589	0.0146654		0.9999	230.922	0.0776535	230.845	0.155307	231	0.000672325	0.000958999
		0.9144	1028	8	1020	16	1036	0.015444	0.0146654		0.9999	231.922	0.0781201	231.844	0.15624	232	0.000673449	0.000958999
		0.9135	1029	8	1021	16	1037	0.0154291	0.0146654		0.9999	232.921	0.0785892	232.843	0.157178	233	0.000674585	0.000958999
		0.9117	1030	8	1022	16	1038	0.0154143	0.0146654		0.9999	233.921	0.0790609	233.842	0.158122	234	0.000675734	0.000958999
		0.9076	1031	8	1023	16	1039	0.0153994	0.0146654		0.9999	234.92	0.0795352	234.841	0.15907	235	0.000676895	0.000958999
		0.9072	1032	8	1024	16	1040	0.0153846	0.0146654		0.9999	235.92	0.080012	235.84	0.160024	236	0.000678068	0.000958999
		0.907	1033	8	1025	16	1041	0.0153698	0.0146654		0.9999	236.92	0.0804915	236.839	0.160983	237	0.000679253	0.000958999
		0.9066	1034	8	1026	16	1042	0.0153551	0.0146654		0.9999	237.919	0.0809737	237.838	0.161947	238	0.000680451	0.000958999
		0.9051	1035	8	1027	16	1043	0.0153404	0.0146654		0.9999	238.919	0.0814585	238.837	0.162917	239	0.000681661	0.000958999
		0.9042	1036	8	1028	16	1044	0.0153257	0.0146654		0.9999	239.918	0.081946	239.836	0.163892	240	0.000682883	0.000958999
		0.9037	1040	8	1032	16	1048	0.0152672	0.0146654		0.9999	240.918	0.0824361	240.835	0.164872	241	0.000684117	0.000958999
		0.9024	1042	8	1034	16	1050	0.0152381	0.0146654		0.9999	241.917	0.082929	241.834	0.165858	242	0.000685364	0.000958999
		0.9015	1043	8	1035	16	1051	0.0152236	0.0146654		0.9999	242.917	0.0834247	242.833	0.166849	243	0.000686623	0.000958999
		0.9007	1044	8	1036	16	1052	0.0152091	0.0146654		0.9999	243.916	0.083923	243.832	0.167846	244	0.000687894	0.000958999
		0.9006	1045	8	1037	16	1053	0.0151947	0.0146654		0.9999	244.916	0.0844242	244.831	0.168848	245	0.000689177	0.000958999
		0.9005	1046	8	1038	16	1054	0.0151803	0.0146654		0.9999	245.915	0.0849281	245.83	0.169856	246	0.000690473	0.000958999
		0.8995	1047	8	1039	16	1055	0.0151659	0.0146654		0.9999	246.915	0.0854349	246.829	0.17087	247	0.00069178	0.000958999
		0.8987	1048	8	1040	16	1056	0.0151515	0.0146654		0.9999	247.914	0.0859444	247.828	0.171889	248	0.0006931	0.000958999
		0.8968	1049	8	1041	16	1057	0.0151372	0.0146654		0.9999	248.914	0.0864568	248.827	0.172914	249	0.000694432	0.000958999
		0.8954	1050	8	1042	16	1058	0.0151229	0.0146654		0.9999	249.913	0.0869721	249.826	0.173944	250	0.000695777	0.000958999
		0.8939	1051	8	1043	16	1059	0.0151086	0.0146654		0.9999	250.913	0.0874902	250.825	0.17498	251	0.000697133	0.000958999
		0.8936	1052	8	1044	16	1060	0.0150943	0.0146654		0.9999	251.912	0.0880112	251.824	0.176022	252	0.000698502	0.000958999
		0.8931	1053	8	1045	16	1061	0.0150801	0.0146654		0.9999	252.911	0.0885352	252.823	0.17707	253	0.000699883	0.000958999
		0.8904	1056	8	1048	16	1064	0.0150376	0.0146654		0.9999	253.911	0.089062	253.822	0.178124	254	0.000701276	0.000958999
		0.8899	1057	8	1049	16	1065	0.0150235	0.0146654		0.9999	254.91	0.0895918	254.821	0.179184	255	0.000702681	0.000958999
		0.8886	1058	8	1050	16	1066	0.0150094	0.0146654		0.9999	255.91	0.0901246	255.82	0.180249	256	0.000704098	0.000958999
		0.8878	1059	8	1051	16	1067	0.0149953	0.0146654		0.9999	256.909	0.0906603	256.819	0.181321	257	0.000705528	0.000958999
		0.8872	1060	8	1052	16	1068	0.0149813	0.0146654		0.9999	257.909	0.091199	257.818	0.182398	258	0.000706969	0.000958999
		0.8861	1061	8	1053	16	1069	0.0149673	0.0146654		0.9999	258.908	0.0917408	258.817	0.183482	259	0.000708423	0.000958999
		0.8857	1062	8	1054	16	1070	0.0149533	0.0146654		0.9999	259.908	0.0922855	259.815	0.184571	260	0.000709889	0.000958999
		0.8855	1064	8	1056	16	1072	0.0149254	0.0146654		0.9999	260.907	0.0928333	260.814	0.185667	261	0.000711366	0.000958999
		0.8821	1065	8	1057	16	1073	0.0149115	0.0146654		0.9999	261.907	0.0933842	261.813	0.186768	262	0.000712856	0.000958999
		0.8803	1066	8	1058	16	1074	0.0148976	0.0146654		0.9999	262.906	0.0939381	262.812	0.187876	263	0.000714358	0.000958999
		0.8794	1067	8	1059	16	1075	0.0148837	0.0146654		0.9999	263.906	0.0944952	263.811	0.18899	264	0.000715872	0.000958999
		0.8785	1068	8	1060	16	1076	0.0148699	0.0146654		0.9999	264.905	0.0950553	264.81	0.190111	265	0.000717398	0.000958999
		0.8781	1070	8	1062	16	1078	0.0148423	0.0146654		0.9999	265.904	0.0956186	265.809	0.191237	266	0.000718936	0.000958999
		0.878	1071	8	1063	16	1079	0.0148285	0.0146654		0.9999	266.904	0.096185	266.808	0.19237	267	0.000720487	0.000958999
		0.8768	1072	8	1064	16	1080	0.0148148	0.0146654		0.9999	267.903	0.0967545	267.806	0.193509	268	0.000722049	0.000958999
		0.8763	1073	8	1065	16	1081	0.0148011	0.0146654		0.9999	268.903	0.0973273	268.805	0.194655	269	0.000723623	0.000958999
		0.8749	1075	8	1067	16	1083	0.0147738	0.0146654		0.9999	269.902	0.0979032	269.804	0.195806	270	0.000725209	0.000958999
		0.8735	1077	8	1069	16	1085	0.0147465	0.0146654		0.9998	270.902	0.0984823	270.803	0.196965	271	0.000726807	0.00128265
		0.8716	1078	8	1070	16	1086	0.014733	0.0146654		0.9998	271.901	0.0990647	271.802	0.198129	272	0.000728417	0.00128265
		0.8715	1079	8	1071	16	1087	0.0147194	0.0146654		0.9998	272.9	0.0996503	272.801	0.199301	273	0.000730039	0.00128265
		0.8712	1083	8	1075	16	1091	0.0146654	0.0146654		0.9998	273.9	0.100239	273.8	0.200478	274	0.000731672	0.00128265
		0.8673	1083	9	1074	18	1092	0.0164835	0.0160571		0.9998	274.899	0.100831	274.798	0.201662	275	0.000733318	0.00128265
		0.8663	1084	9	1075	18	1093	0.0164684	0.0160571		0.9998	275.899	0.101427	275.797	0.202853	276	0.000734976	0.00128265
		0.8646	1092	9	1083	18	1101	0.0163488	0.0160571		0.9998	276.898	0.102025	276.796	0.204051	277	0.000736645	0.00128265
		0.8626	1093	9	1084	18	1102	0.0163339	0.0160571		0.9998	277.897	0.102627	277.795	0.205255	278	0.000738326	0.00128265
		0.8609	1094	9	1085	18	1103	0.0163191	0.0160571		0.9998	278.897	0.103233	278.794	0.206465	279	0.00074002	0.00128265
		0.8595	1097	9	1088	18	1106	0.0162749	0.0160571		0.9998	279.896	0.103841	279.792	0.207683	280	0.000741725	0.00128265
		0.857	1099	9	1090	18	1108	0.0162455	0.0160571		0.9998	280.896	0.104454	280.791	0.208907	281	0.000743441	0.00128265
		0.8553	1102	9	1093	18	1111	0.0162016	0.0160571		0.9998	281.895	0.105069	281.79	0.210138	282	0.00074517	0.00128265
		0.855	1103	9	1094	18	1112	0.0161871	0.0160571		0.9998	282.894	0.105688	282.789	0.211376	283	0.000746911	0.00128265
		0.8548	1104	9	1095	18	1113	0.0161725	0.0160571		0.9998	283.894	0.10631	283.787	0.21262	284	0.000748663	0.00128265
		0.8547	1105	9	1096	18	1114	0.016158	0.0160571		0.9998	284.893	0.106936	284.786	0.213872	285	0.000750427	0.00128265
		0.8538	1106	9	1097	18	1115	0.0161435	0.0160571		0.9998	285.892	0.107565	285.785	0.21513	286	0.000752203	0.00128265
		0.8533	1108	9	1099	18	1117	0.0161146	0.0160571		0.9998	286.892	0.108198	286.784	0.216395	287	0.00075399	0.00128265
		0.8526	1112	9	1103	18	1121	0.0160571	0.0160571		0.9998	287.891	0.108834	287.782	0.217667	288	0.000755789	0.00128265
		0.8509	1112	10	1102	20	1122	0.0178253	0.0174672		0.9998	288.891	0.109473	288.781	0.218946	289	0.0007576	0.00128265
		0.8493	1113	10	1103	20	1123	0.0178094	0.0174672		0.9998	289.89	0.110116	289.78	0.220233	290	0.000759423	0.00128265
		0.8472	1114	10	1104	20	1124	0.0177936	0.0174672		0.9998	290.889	0.110763	290.778	0.221526	291	0.000761257	0.00128265
		0.847	1115	10	1105	20	1125	0.0177778	0.0174672		0.9998	291.889	0.111413	291.777	0.222826	292	0.000763103	0.00128265
		0.8453	1116	10	1106	20	1126	0.017762	0.0174672		0.9998	292.888	0.112067	292.776	0.224134	293	0.000764961	0.00128265
		0.8441	1119	10	1109	20	1129	0.0177148	0.0174672		0.9998	293.887	0.112724	293.775	0.225448	294	0.00076683	0.00128265
		0.8402	1121	10	1111	20	1131	0.0176835	0.0174672		0.9998	294.887	0.113385	294.773	0.22677	295	0.000768711	0.00128265
		0.8387	1122	10	1112	20	1132	0.0176678	0.0174672		0.9998	295.886	0.114049	295.772	0.228099	296	0.000770604	0.00128265
		0.8385	1123	10	1113	20	1133	0.0176523	0.0174672		0.9998	296.885	0.114717	296.771	0.229435	297	0.000772508	0.00128265
		0.8375	1124	10	1114	20	1134	0.0176367	0.0174672		0.9998	297.885	0.115389	297.769	0.230778	298	0.000774424	0.00128265
		0.8354	1125	10	1115	20	1135	0.0176211	0.0174672		0.9998	298.884	0.116064	298.768	0.232129	299	0.000776351	0.00128265
		0.832	1126	10	1116	20	1136	0.0176056	0.0174672		0.9998	299.883	0.116744	299.767	0.233487	300	0.00077829	0.00128265
		0.8319	1127	10	1117	20	1137	0.0175901	0.0174672		0.9998	300.883	0.117426	300.765	0.234852	301	0.000780241	0.00128265
		0.8306	1131	10	1121	20	1141	0.0175285	0.0174672		0.9998	301.882	0.118113	301.764	0.236225	302	0.000782203	0.00128265
		0.8298	1132	10	1122	20	1142	0.0175131	0.0174672		0.9998	302.881	0.118803	302.762	0.237605	303	0.000784176	0.00128265
		0.8258	1133	10	1123	20	1143	0.0174978	0.0174672		0.9998	303.881	0.119497	303.761	0.238993	304	0.000786162	0.00128265
		0.8255	1134	10	1124	20	1144	0.0174825	0.0174672		0.9998	304.88	0.120194	304.76	0.240388	305	0.000788158	0.00128265
		0.8251	1135	10	1125	20	1145	0.0174672	0.0174672		0.9998	305.879	0.120895	305.758	0.241791	306	0.000790166	0.00128265
		0.8223	1135	11	1124	22	1146	0.0191972	0.0190641		0.9998	306.878	0.121601	306.757	0.243201	307	0.000792186	0.00128265
		0.8207	1136	11	1125	22	1147	0.0191805	0.0190641		0.9998	307.878	0.122309	307.755	0.244619	308	0.000794217	0.00128265
		0.8206	1138	11	1127	22	1149	0.0191471	0.0190641		0.9997	308.877	0.123022	308.754	0.246044	309	0.00079626	0.00187558
		0.8202	1139	11	1128	22	1150	0.0191304	0.0190641		0.9997	309.876	0.123739	309.753	0.247477	310	0.000798314	0.00187558
		0.8192	1142	11	1131	22	1153	0.0190807	0.0190641		0.9997	310.876	0.124459	310.751	0.248918	311	0.00080038	0.00187558
		0.8171	1143	11	1132	22	1154	0.0190641	0.0190641		0.9997	311.875	0.125183	311.75	0.250367	312	0.000802457	0.00187558
		0.8148	1143	12	1131	24	1155	0.0207792	0.0206009		0.9997	312.874	0.125911	312.748	0.251823	313	0.000804545	0.00187558
		0.8138	1144	12	1132	24	1156	0.0207612	0.0206009		0.9997	313.873	0.126643	313.747	0.253287	314	0.000806645	0.00187558
		0.8122	1146	12	1134	24	1158	0.0207254	0.0206009		0.9997	314.873	0.127379	314.745	0.254758	315	0.000808757	0.00187558
		0.8117	1148	12	1136	24	1160	0.0206897	0.0206009		0.9997	315.872	0.128119	315.744	0.256238	316	0.000810879	0.00187558
		0.8099	1149	12	1137	24	1161	0.0206718	0.0206009		0.9997	316.871	0.128863	316.742	0.257725	317	0.000813014	0.00187558
		0.8093	1150	12	1138	24	1162	0.020654	0.0206009		0.9997	317.87	0.12961	317.741	0.259221	318	0.000815159	0.00187558
		0.8057	1151	12	1139	24	1163	0.0206363	0.0206009		0.9997	318.87	0.130362	318.739	0.260724	319	0.000817316	0.00187558
		0.8048	1153	12	1141	24	1165	0.0206009	0.0206009		0.9997	319.869	0.131118	319.738	0.262235	320	0.000819485	0.00187558
		0.8039	1155	13	1142	26	1168	0.0222603	0.0220901		0.9997	320.868	0.131877	320.736	0.263754	321	0.000821664	0.00187558
		0.8037	1156	13	1143	26	1169	0.0222412	0.0220901		0.9997	321.867	0.132641	321.735	0.265281	322	0.000823856	0.00187558
		0.8023	1157	13	1144	26	1170	0.0222222	0.0220901		0.9997	322.867	0.133408	322.733	0.266817	323	0.000826058	0.00187558
		0.7987	1158	13	1145	26	1171	0.0222032	0.0220901		0.9997	323.866	0.13418	323.732	0.26836	324	0.000828272	0.00187558
		0.798	1159	13	1146	26	1172	0.0221843	0.0220901		0.9997	324.865	0.134956	324.73	0.269912	325	0.000830497	0.00187558
		0.7971	1160	13	1147	26	1173	0.0221654	0.0220901		0.9997	325.864	0.135736	325.729	0.271471	326	0.000832734	0.00187558
		0.796	1161	13	1148	26	1174	0.0221465	0.0220901		0.9997	326.863	0.13652	326.727	0.273039	327	0.000834982	0.00187558
		0.7959	1162	13	1149	26	1175	0.0221277	0.0220901		0.9997	327.863	0.137308	327.725	0.274615	328	0.000837241	0.00187558
		0.7932	1163	13	1150	26	1176	0.0221088	0.0220901		0.9997	328.862	0.1381	328.724	0.276199	329	0.000839512	0.00187558
		0.7921	1164	13	1151	26	1177	0.0220901	0.0220901		0.9997	329.861	0.138896	329.722	0.277792	330	0.000841794	0.00187558
		0.7908	1164	14	1150	28	1178	0.0237691	0.0236088		0.9997	330.86	0.139696	330.721	0.279393	331	0.000844087	0.00187558
		0.7877	1167	14	1153	28	1181	0.0237087	0.0236088		0.9997	331.859	0.140501	331.719	0.281002	332	0.000846392	0.00187558
		0.7865	1168	14	1154	28	1182	0.0236887	0.0236088		0.9997	332.859	0.14131	332.717	0.28262	333	0.000848708	0.00187558
		0.7861	1169	14	1155	28	1183	0.0236686	0.0236088		0.9997	333.858	0.142123	333.716	0.284246	334	0.000851035	0.00187558
		0.7852	1171	14	1157	28	1185	0.0236287	0.0236088		0.9997	334.857	0.14294	334.714	0.28588	335	0.000853373	0.00187558
		0.7829	1172	14	1158	28	1186	0.0236088	0.0236088		0.9997	335.856	0.143762	335.712	0.287523	336	0.000855723	0.00187558
		0.7827	1172	15	1157	30	1187	0.0252738	0.0251889		0.9997	336.855	0.144587	336.711	0.289175	337	0.000858085	0.00187558
		0.7823	1173	15	1158	30	1188	0.0252525	0.0251889		0.9997	337.855	0.145417	337.709	0.290835	338	0.000860457	0.00187558
		0.7805	1174	15	1159	30	1189	0.0252313	0.0251889		0.9997	338.854	0.146252	338.707	0.292503	339	0.000862841	0.00187558
		0.7803	1175	15	1160	30	1190	0.0252101	0.0251889		0.9997	339.853	0.14709	339.706	0.29418	340	0.000865236	0.00187558
		0.7801	1176	15	1161	30	1191	0.0251889	0.0251889		0.9997	340.852	0.147933	340.704	0.295866	341	0.000867643	0.00187558
		0.78	1176	16	1160	32	1192	0.0268456	0.0264026		0.9997	341.851	0.14878	341.702	0.297561	342	0.000870061	0.00187558
		0.7799	1177	16	1161	32	1193	0.0268231	0.0264026		0.9997	342.85	0.149632	342.701	0.299264	343	0.00087249	0.00187558
		0.7773	1178	16	1162	32	1194	0.0268007	0.0264026		0.9997	343.85	0.150488	343.699	0.300976	344	0.00087493	0.00187558
		0.7759	1179	16	1163	32	1195	0.0267782	0.0264026		0.9997	344.849	0.151348	344.697	0.302697	345	0.000877382	0.00187558
		0.7738	1183	16	1167	32	1199	0.0266889	0.0264026		0.9997	345.848	0.152213	345.696	0.304426	346	0.000879845	0.00187558
		0.7705	1184	16	1168	32	1200	0.0266667	0.0264026		0.9997	346.847	0.153082	346.694	0.306165	347	0.00088232	0.00187558
		0.7695	1185	16	1169	32	1201	0.0266445	0.0264026		0.9997	347.846	0.153956	347.692	0.307912	348	0.000884805	0.00187558
		0.7692	1186	16	1170	32	1202	0.0266223	0.0264026		0.9997	348.845	0.154834	348.69	0.309669	349	0.000887303	0.00187558
		0.7688	1187	16	1171	32	1203	0.0266002	0.0264026		0.9997	349.844	0.155717	349.689	0.311434	350	0.000889811	0.00187558
		0.7686	1188	16	1172	32	1204	0.0265781	0.0264026		0.9997	350.843	0.156604	350.687	0.313208	351	0.000892331	0.00187558
		0.7673	1189	16	1173	32	1205	0.026556	0.0264026		0.9997	351.843	0.157496	351.685	0.314991	352	0.000894862	0.00187558
		0.7672	1190	16	1174	32	1206	0.026534	0.0264026		0.9997	352.842	0.158392	352.683	0.316784	353	0.000897404	0.00187558
		0.7639	1191	16	1175	32	1207	0.026512	0.0264026		0.9997	353.841	0.159293	353.681	0.318585	354	0.000899958	0.00187558
		0.7625	1192	16	1176	32	1208	0.0264901	0.0264026		0.9997	354.84	0.160198	354.68	0.320396	355	0.000902523	0.00187558
		0.7619	1193	16	1177	32	1209	0.0264682	0.0264026		0.9997	355.839	0.161108	355.678	0.322216	356	0.0009051	0.00187558
		0.759	1195	16	1179	32	1211	0.0264244	0.0264026		0.9997	356.838	0.162022	356.676	0.324045	357	0.000907688	0.00187558
		0.7582	1196	16	1180	32	1212	0.0264026	0.0264026		0.9997	357.837	0.162941	357.674	0.325883	358	0.000910287	0.00187558
		0.7572	1196	17	1179	34	1213	0.0280297	0.0280297		0.9997	358.836	0.163865	358.672	0.32773	359	0.000912898	0.00187558
		0.7545	1196	18	1178	36	1214	0.029654	0.0285941		0.9997	359.835	0.164794	359.67	0.329587	360	0.00091552	0.00187558
		0.754	1197	18	1179	36	1215	0.0296296	0.0285941		0.9997	360.834	0.165727	360.669	0.331453	361	0.000918153	0.00187558
		0.7487	1198	18	1180	36	1216	0.0296053	0.0285941		0.9997	361.833	0.166664	361.667	0.333329	362	0.000920798	0.00187558
		0.7479	1200	18	1182	36	1218	0.0295567	0.0285941		0.9997	362.832	0.167607	362.665	0.335214	363	0.000923454	0.00187558
		0.7453	1201	18	1183	36	1219	0.0295324	0.0285941		0.9997	363.831	0.168554	363.663	0.337108	364	0.000926122	0.00187558
		0.7411	1202	18	1184	36	1220	0.0295082	0.0285941		0.9997	364.83	0.169506	364.661	0.339012	365	0.000928801	0.00187558
		0.74	1203	18	1185	36	1221	0.029484	0.0285941		0.9997	365.83	0.170463	365.659	0.340926	366	0.000931492	0.00187558
		0.7385	1204	18	1186	36	1222	0.0294599	0.0285941		0.9997	366.829	0.171425	366.657	0.342849	367	0.000934194	0.00187558
		0.7374	1205	18	1187	36	1223	0.0294358	0.0285941		0.9997	367.828	0.172391	367.655	0.344782	368	0.000936907	0.00187558
		0.7342	1206	18	1188	36	1224	0.0294118	0.0285941		0.9997	368.827	0.173362	368.653	0.346724	369	0.000939632	0.00187558
		0.734	1207	18	1189	36	1225	0.0293878	0.0285941		0.9997	369.826	0.174338	369.651	0.348676	370	0.000942368	0.00187558
		0.7335	1208	18	1190	36	1226	0.0293638	0.0285941		0.9997	370.825	0.175319	370.649	0.350638	371	0.000945116	0.00187558
		0.7328	1209	18	1191	36	1227	0.0293399	0.0285941		0.9997	371.824	0.176305	371.647	0.35261	372	0.000947876	0.00187558
		0.7301	1210	18	1192	36	1228	0.029316	0.0285941		0.9997	372.823	0.177296	372.645	0.354591	373	0.000950647	0.00187558
		0.7296	1211	18	1193	36	1229	0.0292921	0.0285941		0.9997	373.822	0.178291	373.643	0.356582	374	0.000953429	0.00187558
		0.7295	1212	18	1194	36	1230	0.0292683	0.0285941		0.9997	374.821	0.179292	374.641	0.358584	375	0.000956223	0.00187558
		0.7253	1213	18	1195	36	1231	0.0292445	0.0285941		0.9997	375.82	0.180297	375.639	0.360595	376	0.000959029	0.00187558
		0.7202	1214	18	1196	36	1232	0.0292208	0.0285941		0.9997	376.819	0.181308	376.637	0.362616	377	0.000961846	0.00187558
		0.7196	1215	18	1197	36	1233	0.0291971	0.0285941		0.9997	377.818	0.182323	377.635	0.364647	378	0.000964674	0.00187558
		0.7168	1216	18	1198	36	1234	0.0291734	0.0285941		0.9997	378.817	0.183344	378.633	0.366688	379	0.000967515	0.00187558
		0.7145	1217	18	1199	36	1235	0.0291498	0.0285941		0.9997	379.816	0.18437	379.631	0.368739	380	0.000970367	0.00187558
		0.7139	1219	18	1201	36	1237	0.0291027	0.0285941		0.9997	380.815	0.1854	380.629	0.370801	381	0.00097323	0.00187558
		0.7103	1220	18	1202	36	1238	0.0290792	0.0285941		0.9997	381.814	0.186436	381.627	0.372872	382	0.000976105	0.00187558
		0.7094	1221	18	1203	36	1239	0.0290557	0.0285941		0.9997	382.813	0.187477	382.625	0.374954	383	0.000978992	0.00187558
		0.7086	1226	18	1208	36	1244	0.0289389	0.0285941		0.9997	383.811	0.188523	383.623	0.377046	384	0.000981891	0.00187558
		0.7061	1227	18	1209	36	1245	0.0289157	0.0285941		0.9997	384.81	0.189574	384.621	0.379148	385	0.000984801	0.00187558
		0.7058	1230	18	1212	36	1248	0.0288462	0.0285941		0.9997	385.809	0.190631	385.619	0.381261	386	0.000987723	0.00187558
		0.7029	1231	18	1213	36	1249	0.0288231	0.0285941		0.9997	386.808	0.191692	386.617	0.383384	387	0.000990657	0.00187558
		0.6985	1233	18	1215	36	1251	0.028777	0.0285941		0.9997	387.807	0.192759	387.614	0.385518	388	0.000993602	0.00187558
		0.6961	1234	18	1216	36	1252	0.028754	0.0285941		0.9997	388.806	0.193831	388.612	0.387662	389	0.000996559	0.00187558
		0.6953	1235	18	1217	36	1253	0.028731	0.0285941		0.9997	389.805	0.194908	389.61	0.389816	390	0.000999528	0.00187558
		0.6923	1236	18	1218	36	1254	0.0287081	0.0285941		0.9997	390.804	0.195991	390.608	0.391981	391	0.00100251	0.00187558
		0.6854	1237	18	1219	36	1255	0.0286853	0.0285941		0.9997	391.803	0.197078	391.606	0.394157	392	0.0010055	0.00187558
		0.6838	1238	18	1220	36	1256	0.0286624	0.0285941		0.9997	392.802	0.198171	392.604	0.396343	393	0.00100851	0.00187558
		0.6836	1239	18	1221	36	1257	0.0286396	0.0285941		0.9997	393.801	0.19927	393.601	0.39854	394	0.00101152	0.00187558
		0.6818	1240	18	1222	36	1258	0.0286169	0.0285941		0.9997	394.8	0.200374	394.599	0.400748	395	0.00101455	0.00187558
		0.6815	1241	18	1223	36	1259	0.0285941	0.0285941		0.9997	395.799	0.201483	395.597	0.402966	396	0.00101759	0.00187558
		0.6799	1241	19	1222	38	1260	0.0301587	0.0301348		0.9997	396.797	0.202598	396.595	0.405195	397	0.00102064	0.00187558
		0.6786	1242	19	1223	38	1261	0.0301348	0.0301348		0.9997	397.796	0.203718	397.593	0.407435	398	0.00102371	0.00187558
		0.6775	1242	20	1222	40	1262	0.0316957	0.0309837		0.9997	398.795	0.204843	398.59	0.409687	399	0.00102678	0.00187558
		0.6766	1243	20	1223	40	1263	0.0316706	0.0309837		0.9997	399.794	0.205974	399.588	0.411949	400	0.00102987	0.00187558
		0.6747	1244	20	1224	40	1264	0.0316456	0.0309837		0.9997	400.793	0.207111	400.586	0.414222	401	0.00103297	0.00187558
		0.6738	1246	20	1226	40	1266	0.0315956	0.0309837		0.9997	401.792	0.208253	401.583	0.416506	402	0.00103608	0.00187558
		0.6736	1247	20	1227	40	1267	0.0315706	0.0309837		0.9997	402.791	0.2094	402.581	0.418801	403	0.00103921	0.00187558
		0.6724	1248	20	1228	40	1268	0.0315457	0.0309837		0.9997	403.789	0.210554	403.579	0.421107	404	0.00104234	0.00187558
		0.6685	1249	20	1229	40	1269	0.0315209	0.0309837		0.9997	404.788	0.211712	404.577	0.423425	405	0.00104549	0.00187558
		0.6682	1250	20	1230	40	1270	0.0314961	0.0309837		0.9997	405.787	0.212877	405.574	0.425753	406	0.00104865	0.00187558
		0.6681	1251	20	1231	40	1271	0.0314713	0.0309837		0.9997	406.786	0.214047	406.572	0.428093	407	0.00105183	0.00187558
		0.6678	1252	20	1232	40	1272	0.0314465	0.0309837		0.9997	407.785	0.215222	407.57	0.430445	408	0.00105501	0.00187558
		0.6644	1253	20	1233	40	1273	0.0314218	0.0309837		0.9997	408.784	0.216404	408.567	0.432807	409	0.00105821	0.00187558
		0.663	1254	20	1234	40	1274	0.0313972	0.0309837		0.9997	409.782	0.217591	409.565	0.435181	410	0.00106142	0.00187558
		0.6608	1255	20	1235	40	1275	0.0313725	0.0309837		0.9997	410.781	0.218783	410.562	0.437567	411	0.00106464	0.00187558
		0.658	1256	20	1236	40	1276	0.031348	0.0309837		0.9997	411.78	0.219982	411.56	0.439964	412	0.00106787	0.00187558
		0.6559	1257	20	1237	40	1277	0.0313234	0.0309837		0.9997	412.779	0.221186	412.558	0.442373	413	0.00107112	0.00187558
		0.655	1259	20	1239	40	1279	0.0312744	0.0309837		0.9997	413.778	0.222396	413.555	0.444793	414	0.00107438	0.00187558
		0.654	1260	20	1240	40	1280	0.03125	0.0309837		0.9997	414.776	0.223612	414.553	0.447225	415	0.00107765	0.00187558
		0.6531	1261	20	1241	40	1281	0.0312256	0.0309837		0.9996	415.775	0.224834	415.55	0.449669	416	0.00108093	0.00247319
		0.6521	1262	20	1242	40	1282	0.0312012	0.0309837		0.9996	416.774	0.226062	416.548	0.452124	417	0.00108423	0.00247319
		0.6492	1263	20	1243	40	1283	0.0311769	0.0309837		0.9996	417.773	0.227296	417.545	0.454591	418	0.00108754	0.00247319
		0.6486	1264	20	1244	40	1284	0.0311526	0.0309837		0.9996	418.771	0.228535	418.543	0.45707	419	0.00109086	0.00247319
		0.6459	1265	20	1245	40	1285	0.0311284	0.0309837		0.9996	419.77	0.229781	419.54	0.459562	420	0.00109419	0.00247319
		0.6421	1266	20	1246	40	1286	0.0311042	0.0309837		0.9996	420.769	0.231032	420.538	0.462065	421	0.00109754	0.00247319
		0.6411	1267	20	1247	40	1287	0.03108	0.0309837		0.9995	421.768	0.23229	421.535	0.46458	422	0.0011009	0.00252108
		0.6404	1268	20	1248	40	1288	0.0310559	0.0309837		0.9995	422.766	0.233553	422.533	0.467107	423	0.00110427	0.00252108
		0.6402	1269	20	1249	40	1289	0.0310318	0.0309837		0.9994	423.765	0.234823	423.53	0.469646	424	0.00110766	0.00272766
		0.6389	1270	20	1250	40	1290	0.0310078	0.0309837		0.9994	424.764	0.236099	424.528	0.472197	425	0.00111105	0.00272766
		0.6356	1271	20	1251	40	1291	0.0309837	0.0309837		0.9994	425.763	0.237381	425.525	0.474761	426	0.00111446	0.00272766
		0.634	1271	21	1250	42	1292	0.0325077	0.0320366		0.9994	426.761	0.238669	426.523	0.477337	427	0.00111789	0.00272766
		0.629	1272	21	1251	42	1293	0.0324826	0.0320366		0.9994	427.76	0.239963	427.52	0.479925	428	0.00112132	0.00272766
		0.6278	1273	21	1252	42	1294	0.0324575	0.0320366		0.9994	428.759	0.241263	428.517	0.482526	429	0.00112477	0.00272766
		0.626	1274	21	1253	42	1295	0.0324324	0.0320366		0.9994	429.757	0.24257	429.515	0.485139	430	0.00112823	0.00272766
		0.6256	1275	21	1254	42	1296	0.0324074	0.0320366		0.9994	430.756	0.243882	430.512	0.487765	431	0.0011317	0.00272766
		0.6246	1276	21	1255	42	1297	0.0323824	0.0320366		0.9994	431.755	0.245201	431.51	0.490403	432	0.00113519	0.00272766
		0.6217	1277	21	1256	42	1298	0.0323575	0.0320366		0.9994	432.753	0.246527	432.507	0.493054	433	0.00113869	0.00272766
		0.6158	1278	21	1257	42	1299	0.0323326	0.0320366		0.9994	433.752	0.247859	433.504	0.495717	434	0.00114221	0.00272766
		0.6136	1279	21	1258	42	1300	0.0323077	0.0320366		0.9994	434.751	0.249197	434.502	0.498393	435	0.00114573	0.00272766
		0.6106	1280	21	1259	42	1301	0.0322829	0.0320366		0.9994	435.749	0.250541	435.499	0.501082	436	0.00114927	0.00272766
		0.6092	1281	21	1260	42	1302	0.0322581	0.0320366		0.9994	436.748	0.251892	436.496	0.503784	437	0.00115282	0.00272766
		0.6037	1282	21	1261	42	1303	0.0322333	0.0320366		0.9994	437.747	0.253249	437.494	0.506499	438	0.00115639	0.00272766
		0.6026	1283	21	1262	42	1304	0.0322086	0.0320366		0.9994	438.745	0.254613	438.491	0.509227	439	0.00115997	0.00272766
		0.6018	1284	21	1263	42	1305	0.0321839	0.0320366		0.9994	439.744	0.255984	439.488	0.511967	440	0.00116356	0.00272766
		0.6015	1285	21	1264	42	1306	0.0321593	0.0320366		0.9994	440.743	0.257361	440.485	0.514721	441	0.00116717	0.00272766
		0.5977	1286	21	1265	42	1307	0.0321347	0.0320366		0.9994	441.741	0.258744	441.483	0.517488	442	0.00117079	0.00272766
		0.5959	1287	21	1266	42	1308	0.0321101	0.0320366		0.9994	442.74	0.260134	442.48	0.520268	443	0.00117442	0.00272766
		0.5951	1288	21	1267	42	1309	0.0320856	0.0320366		0.9994	443.738	0.261531	443.477	0.523061	444	0.00117807	0.00272766
		0.5938	1289	21	1268	42	1310	0.0320611	0.0320366		0.9994	444.737	0.262934	444.474	0.525868	445	0.00118173	0.00272766
		0.5901	1290	21	1269	42	1311	0.0320366	0.0320366		0.9994	445.736	0.264344	445.471	0.528688	446	0.0011854	0.00272766
		0.5899	1290	22	1268	44	1312	0.0335366	0.0333839		0.9994	446.734	0.265761	446.468	0.531521	447	0.00118909	0.00272766
		0.588	1291	22	1269	44	1313	0.033511	0.0333839		0.9994	447.733	0.267184	447.466	0.534368	448	0.00119279	0.00272766
		0.5854	1292	22	1270	44	1314	0.0334855	0.0333839		0.9994	448.731	0.268614	448.463	0.537229	449	0.0011965	0.00272766
		0.5739	1293	22	1271	44	1315	0.0334601	0.0333839		0.9994	449.73	0.270051	449.46	0.540103	450	0.00120023	0.00272766
		0.5734	1294	22	1272	44	1316	0.0334347	0.0333839		0.9994	450.729	0.271495	450.457	0.54299	451	0.00120397	0.00272766
		0.5707	1295	22	1273	44	1317	0.0334093	0.0333839		0.9994	451.727	0.272946	451.454	0.545892	452	0.00120772	0.00272766
		0.5693	1296	22	1274	44	1318	0.0333839	0.0333839		0.9994	452.726	0.274403	452.451	0.548807	453	0.00121149	0.00272766
		0.5651	1296	23	1273	46	1319	0.0348749	0.0342262		0.9994	453.724	0.275868	453.448	0.551736	454	0.00121528	0.00272766
		0.5644	1298	23	1275	46	1321	0.0348221	0.0342262		0.9993	454.723	0.277339	454.445	0.554679	455	0.00121907	0.00337595
		0.5626	1299	23	1276	46	1322	0.0347958	0.0342262		0.9993	455.721	0.278818	455.442	0.557636	456	0.00122289	0.00337595
		0.5625	1300	23	1277	46	1323	0.0347695	0.0342262		0.9993	456.72	0.280303	456.439	0.560607	457	0.00122671	0.00337595
		0.5582	1301	23	1278	46	1324	0.0347432	0.0342262		0.9993	457.718	0.281796	457.436	0.563592	458	0.00123055	0.00337595
		0.5574	1302	23	1279	46	1325	0.034717	0.0342262		0.9993	458.717	0.283296	458.433	0.566591	459	0.0012344	0.00337595
		0.5559	1303	23	1280	46	1326	0.0346908	0.0342262		0.9993	459.715	0.284802	459.43	0.569605	460	0.00123827	0.00337595
		0.5511	1304	23	1281	46	1327	0.0346647	0.0342262		0.9993	460.714	0.286316	460.427	0.572633	461	0.00124215	0.00337595
		0.5499	1305	23	1282	46	1328	0.0346386	0.0342262		0.9993	461.712	0.287837	461.424	0.575675	462	0.00124605	0.00337595
		0.5492	1306	23	1283	46	1329	0.0346125	0.0342262		0.9993	462.711	0.289366	462.421	0.578732	463	0.00124996	0.00337595
		0.5491	1310	23	1287	46	1333	0.0345086	0.0342262		0.9993	463.709	0.290901	463.418	0.581803	464	0.00125389	0.00337595
		0.5462	1312	23	1289	46	1335	0.0344569	0.0342262		0.9993	464.708	0.292444	464.415	0.584888	465	0.00125782	0.00337595
		0.5449	1313	23	1290	46	1336	0.0344311	0.0342262		0.9993	465.706	0.293994	465.412	0.587989	466	0.00126178	0.00337595
		0.5442	1314	23	1291	46	1337	0.0344054	0.0342262		0.9993	466.704	0.295552	466.409	0.591104	467	0.00126575	0.00337595
		0.5414	1315	23	1292	46	1338	0.0343797	0.0342262		0.9993	467.703	0.297117	467.406	0.594234	468	0.00126973	0.00337595
		0.5378	1316	23	1293	46	1339	0.034354	0.0342262		0.9993	468.701	0.298689	468.403	0.597378	469	0.00127373	0.00337595
		0.5359	1317	23	1294	46	1340	0.0343284	0.0342262		0.9993	469.7	0.300269	469.399	0.600538	470	0.00127774	0.00337595
		0.5329	1318	23	1295	46	1341	0.0343028	0.0342262		0.9993	470.698	0.301856	470.396	0.603713	471	0.00128177	0.00337595
		0.5327	1319	23	1296	46	1342	0.0342772	0.0342262		0.9993	471.697	0.303451	471.393	0.606902	472	0.00128581	0.00337595
		0.5292	1320	23	1297	46	1343	0.0342517	0.0342262		0.9993	472.695	0.305054	472.39	0.610107	473	0.00128987	0.00337595
		0.5268	1321	23	1298	46	1344	0.0342262	0.0342262		0.9993	473.693	0.306663	473.387	0.613327	474	0.00129394	0.00337595
		0.5205	1321	24	1297	48	1345	0.0356877	0.0355556		0.9993	474.692	0.308281	474.383	0.616562	475	0.00129803	0.00337595
		0.5176	1322	24	1298	48	1346	0.0356612	0.0355556		0.9993	475.69	0.309906	475.38	0.619813	476	0.00130213	0.00337595
		0.5172	1323	24	1299	48	1347	0.0356347	0.0355556		0.9993	476.688	0.311539	476.377	0.623079	477	0.00130624	0.00337595
		0.5161	1324	24	1300	48	1348	0.0356083	0.0355556		0.9993	477.687	0.31318	477.374	0.62636	478	0.00131038	0.00337595
		0.5156	1325	24	1301	48	1349	0.0355819	0.0355556		0.9993	478.685	0.314829	478.37	0.629657	479	0.00131452	0.00337595
		0.5155	1326	24	1302	48	1350	0.0355556	0.0355556		0.9993	479.684	0.316485	479.367	0.63297	480	0.00131869	0.00337595
		0.5152	1326	25	1301	50	1351	0.0370096	0.0368189		0.9993	480.682	0.318149	480.364	0.636298	481	0.00132287	0.00337595
		0.5146	1327	25	1302	50	1352	0.0369822	0.0368189		0.9993	481.68	0.319821	481.36	0.639643	482	0.00132706	0.00337595
		0.5141	1328	25	1303	50	1353	0.0369549	0.0368189		0.9993	482.678	0.321501	482.357	0.643003	483	0.00133127	0.00337595
		0.5125	1329	25	1304	50	1354	0.0369276	0.0368189		0.9993	483.677	0.323189	483.354	0.646379	484	0.00133549	0.00337595
		0.5106	1330	25	1305	50	1355	0.0369004	0.0368189		0.9993	484.675	0.324885	484.35	0.64977	485	0.00133973	0.00337595
		0.5096	1331	25	1306	50	1356	0.0368732	0.0368189		0.9993	485.673	0.326589	485.347	0.653179	486	0.00134399	0.00337595
		0.5088	1332	25	1307	50	1357	0.036846	0.0368189		0.9993	486.672	0.328301	486.343	0.656603	487	0.00134826	0.00337595
		0.5048	1333	25	1308	50	1358	0.0368189	0.0368189		0.9993	487.67	0.330022	487.34	0.660043	488	0.00135255	0.00337595
		0.5035	1333	26	1307	52	1359	0.0382634	0.0382353		0.9993	488.668	0.33175	488.337	0.6635	489	0.00135685	0.00337595
		0.5031	1334	26	1308	52	1360	0.0382353	0.0382353		0.9993	489.667	0.333487	489.333	0.666973	490	0.00136117	0.00337595
		0.5008	1334	27	1307	54	1361	0.0396767	0.0395315		0.9993	490.665	0.335231	490.33	0.670463	491	0.0013655	0.00337595
		0.4982	1335	27	1308	54	1362	0.0396476	0.0395315		0.9993	491.663	0.336984	491.326	0.673969	492	0.00136986	0.00337595
		0.4973	1336	27	1309	54	1363	0.0396185	0.0395315		0.9993	492.661	0.338746	492.323	0.677492	493	0.00137422	0.00337595
		0.4939	1337	27	1310	54	1364	0.0395894	0.0395315		0.9993	493.659	0.340516	493.319	0.681031	494	0.00137861	0.00337595
		0.49	1338	27	1311	54	1365	0.0395604	0.0395315		0.9993	494.658	0.342294	494.315	0.684588	495	0.00138301	0.00337595
		0.4879	1339	27	1312	54	1366	0.0395315	0.0395315		0.9993	495.656	0.34408	495.312	0.688161	496	0.00138742	0.00337595
		0.4867	1339	28	1311	56	1367	0.0409656	0.0408461		0.9993	496.654	0.345875	496.308	0.691751	497	0.00139185	0.00337595
		0.4865	1340	28	1312	56	1368	0.0409357	0.0408461		0.9993	497.652	0.347679	497.305	0.695358	498	0.0013963	0.00337595
		0.4864	1341	28	1313	56	1369	0.0409058	0.0408461		0.9993	498.651	0.349491	498.301	0.698983	499	0.00140077	0.00337595
		0.4841	1342	28	1314	56	1370	0.0408759	0.0408461		0.9993	499.649	0.351312	499.297	0.702624	500	0.00140525	0.00337595
		0.4809	1343	28	1315	56	1371	0.0408461	0.0408461		0.9993	500.647	0.353141	500.294	0.706283	501	0.00140975	0.00337595
		0.4806	1344	29	1315	58	1373	0.0422433	0.0422433		0.9993	501.645	0.35498	501.29	0.709959	502	0.00141426	0.00337595
		0.479	1344	30	1314	60	1374	0.0436681	0.0436681		0.9993	502.643	0.356826	502.286	0.713653	503	0.00141879	0.00337595
		0.4788	1344	31	1313	62	1375	0.0450909	0.0449275		0.9993	503.641	0.358682	503.283	0.717364	504	0.00142334	0.00337595
		0.4786	1345	31	1314	62	1376	0.0450581	0.0449275		0.9993	504.639	0.360546	504.279	0.721093	505	0.00142791	0.00337595
		0.4772	1346	31	1315	62	1377	0.0450254	0.0449275		0.9993	505.638	0.36242	505.275	0.724839	506	0.00143249	0.00337595
		0.4763	1347	31	1316	62	1378	0.0449927	0.0449275		0.9993	506.636	0.364302	506.271	0.728604	507	0.00143709	0.00337595
		0.4752	1348	31	1317	62	1379	0.0449601	0.0449275		0.9993	507.634	0.366193	507.268	0.732386	508	0.0014417	0.00337595
		0.4749	1349	31	1318	62	1380	0.0449275	0.0449275		0.9993	508.632	0.368093	508.264	0.736186	509	0.00144634	0.00337595
		0.4728	1349	32	1317	64	1381	0.0463432	0.0462762		0.9993	509.63	0.370002	509.26	0.740005	510	0.00145099	0.00337595
		0.4717	1350	32	1318	64	1382	0.0463097	0.0462762		0.9993	510.628	0.371921	510.256	0.743841	511	0.00145566	0.00337595
		0.4702	1351	32	1319	64	1383	0.0462762	0.0462762		0.9993	511.626	0.373848	511.252	0.747696	512	0.00146034	0.00337595
		0.4661	1351	33	1318	66	1384	0.0476879	0.0476879		0.9993	512.624	0.375784	512.248	0.751569	513	0.00146505	0.00337595
		0.4658	1352	34	1318	68	1386	0.049062	0.0488155		0.9992	513.622	0.37773	513.245	0.75546	514	0.00146977	0.00392865
		0.4645	1355	34	1321	68	1389	0.0489561	0.0488155		0.9992	514.62	0.379685	514.241	0.759371	515	0.00147451	0.00392865
		0.4633	1356	34	1322	68	1390	0.0489209	0.0488155		0.9992	515.618	0.38165	515.237	0.763299	516	0.00147926	0.00392865
		0.4624	1357	34	1323	68	1391	0.0488857	0.0488155		0.9992	516.616	0.383623	516.233	0.767247	517	0.00148404	0.00392865
		0.4623	1358	34	1324	68	1392	0.0488506	0.0488155		0.9992	517.614	0.385606	517.229	0.771213	518	0.00148883	0.00392865
		0.4583	1359	34	1325	68	1393	0.0488155	0.0488155		0.9991	518.612	0.387599	518.225	0.775198	519	0.00149364	0.00399454
		0.4566	1359	35	1324	70	1394	0.0502152	0.0502152		0.9991	519.61	0.389601	519.221	0.779202	520	0.00149847	0.00399454
		0.4565	1359	36	1323	72	1395	0.0516129	0.0515759		0.999	520.608	0.391612	520.217	0.783225	521	0.00150331	0.00433153
		0.4554	1360	36	1324	72	1396	0.0515759	0.0515759		0.999	521.606	0.393634	521.213	0.787267	522	0.00150817	0.00433153
		0.4541	1360	37	1323	74	1397	0.0529707	0.0527817		0.999	522.604	0.395664	522.209	0.791329	523	0.00151306	0.00433153
		0.4536	1361	37	1324	74	1398	0.0529328	0.0527817		0.999	523.602	0.397705	523.205	0.79541	524	0.00151796	0.00433153
		0.4526	1362	37	1325	74	1399	0.0528949	0.0527817		0.999	524.6	0.399755	524.2	0.79951	525	0.00152288	0.00433153
		0.4522	1364	37	1327	74	1401	0.0528194	0.0527817		0.999	525.598	0.401815	525.196	0.80363	526	0.00152781	0.00433153
		0.4501	1365	37	1328	74	1402	0.0527817	0.0527817		0.999	526.596	0.403885	526.192	0.80777	527	0.00153277	0.00433153
		0.4497	1365	38	1327	76	1403	0.0541696	0.0540541		0.999	527.594	0.405965	527.188	0.811929	528	0.00153774	0.00433153
		0.4473	1366	38	1328	76	1404	0.0541311	0.0540541		0.999	528.592	0.408054	528.184	0.816109	529	0.00154274	0.00433153
		0.446	1367	38	1329	76	1405	0.0540925	0.0540541		0.999	529.59	0.410154	529.18	0.820308	530	0.00154775	0.00433153
		0.4441	1368	38	1330	76	1406	0.0540541	0.0540541		0.999	530.588	0.412264	530.175	0.824527	531	0.00155278	0.00433153
		0.4439	1368	39	1329	78	1407	0.0554371	0.0553977		0.999	531.586	0.414383	531.171	0.828767	532	0.00155783	0.00433153
		0.4437	1369	39	1330	78	1408	0.0553977	0.0553977		0.999	532.583	0.416513	532.167	0.833026	533	0.0015629	0.00433153
		0.443	1369	40	1329	80	1409	0.0567779	0.0562984		0.999	533.581	0.418653	533.163	0.837307	534	0.00156799	0.00433153
		0.4373	1370	40	1330	80	1410	0.0567376	0.0562984		0.999	534.579	0.420804	534.158	0.841607	535	0.0015731	0.00433153
		0.4372	1371	40	1331	80	1411	0.0566974	0.0562984		0.999	535.577	0.422964	535.154	0.845928	536	0.00157822	0.00433153
		0.4368	1372	40	1332	80	1412	0.0566572	0.0562984		0.999	536.575	0.425135	536.15	0.85027	537	0.00158337	0.00433153
		0.4367	1373	40	1333	80	1413	0.0566171	0.0562984		0.999	537.573	0.427317	537.145	0.854633	538	0.00158854	0.00433153
		0.4363	1374	40	1334	80	1414	0.0565771	0.0562984		0.999	538.57	0.429508	538.141	0.859017	539	0.00159372	0.00433153
		0.434	1375	40	1335	80	1415	0.0565371	0.0562984		0.999	539.568	0.431711	539.137	0.863421	540	0.00159893	0.00433153
		0.4304	1376	40	1336	80	1416	0.0564972	0.0562984		0.999	540.566	0.433923	540.132	0.867847	541	0.00160415	0.00433153
		0.4298	1377	40	1337	80	1417	0.0564573	0.0562984		0.999	541.564	0.436147	541.128	0.872294	542	0.0016094	0.00433153
		0.4294	1378	40	1338	80	1418	0.0564175	0.0562984		0.999	542.562	0.438381	542.123	0.876762	543	0.00161466	0.00433153
		0.4281	1379	40	1339	80	1419	0.0563777	0.0562984		0.999	543.559	0.440626	543.119	0.881252	544	0.00161995	0.00433153
		0.4276	1380	40	1340	80	1420	0.056338	0.0562984		0.999	544.557	0.442881	544.114	0.885763	545	0.00162525	0.00433153
		0.4231	1381	40	1341	80	1421	0.0562984	0.0562984		0.999	545.555	0.445148	545.11	0.890296	546	0.00163058	0.00433153
		0.4227	1381	41	1340	82	1422	0.0576653	0.0576653		0.999	546.553	0.447425	546.105	0.89485	547	0.00163592	0.00433153
		0.4224	1381	42	1339	84	1423	0.0590302	0.0588648		0.999	547.55	0.449713	547.101	0.899427	548	0.00164129	0.00433153
		0.4221	1382	42	1340	84	1424	0.0589888	0.0588648		0.999	548.548	0.452013	548.096	0.904025	549	0.00164668	0.00433153
		0.422	1383	42	1341	84	1425	0.0589474	0.0588648		0.999	549.546	0.454323	549.091	0.908646	550	0.00165208	0.00433153
		0.4207	1384	42	1342	84	1426	0.058906	0.0588648		0.999	550.543	0.456644	550.087	0.913289	551	0.00165751	0.00433153
		0.4191	1385	42	1343	84	1427	0.0588648	0.0588648		0.999	551.541	0.458977	551.082	0.917954	552	0.00166296	0.00433153
		0.4189	1385	43	1342	86	1428	0.0602241	0.0601819		0.9989	552.539	0.461321	552.077	0.922642	553	0.00166843	0.0049424
		0.4187	1386	43	1343	86	1429	0.0601819	0.0601819		0.9989	553.536	0.463676	553.073	0.927352	554	0.00167392	0.0049424
		0.4169	1386	44	1342	88	1430	0.0615385	0.0614525		0.9989	554.534	0.466042	554.068	0.932085	555	0.00167943	0.0049424
		0.4167	1387	44	1343	88	1431	0.0614955	0.0614525		0.9989	555.532	0.46842	555.063	0.93684	556	0.00168496	0.0049424
		0.4149	1388	44	1344	88	1432	0.0614525	0.0614525		0.9989	556.529	0.47081	556.058	0.941619	557	0.00169052	0.0049424
		0.4125	1388	45	1343	90	1433	0.0628053	0.0625		0.9989	557.527	0.47321	557.054	0.946421	558	0.00169609	0.0049424
		0.4112	1390	45	1345	90	1435	0.0627178	0.0625		0.9989	558.524	0.475623	558.049	0.951245	559	0.00170169	0.0049424
		0.4103	1392	45	1347	90	1437	0.0626305	0.0625		0.9989	559.522	0.478047	559.044	0.956094	560	0.00170731	0.0049424
		0.4094	1393	45	1348	90	1438	0.0625869	0.0625		0.9989	560.52	0.480483	560.039	0.960965	561	0.00171295	0.0049424
		0.4067	1394	45	1349	90	1439	0.0625434	0.0625		0.9989	561.517	0.48293	561.034	0.96586	562	0.00171861	0.0049424
		0.4056	1395	45	1350	90	1440	0.0625	0.0625		0.9989	562.515	0.485389	562.029	0.970779	563	0.0017243	0.0049424
		0.4053	1395	46	1349	92	1441	0.0638446	0.0636238		0.9989	563.512	0.487861	563.024	0.975721	564	0.00173	0.0049424
		0.4048	1396	46	1350	92	1442	0.0638003	0.0636238		0.9989	564.51	0.490344	564.019	0.980687	565	0.00173573	0.0049424
		0.4046	1398	46	1352	92	1444	0.0637119	0.0636238		0.9989	565.507	0.492839	565.014	0.985678	566	0.00174148	0.0049424
		0.4042	1399	46	1353	92	1445	0.0636678	0.0636238		0.9989	566.505	0.495346	566.009	0.990692	567	0.00174725	0.0049424
		0.4041	1400	46	1354	92	1446	0.0636238	0.0636238		0.9989	567.502	0.497865	567.004	0.995731	568	0.00175305	0.0049424
		0.4017	1400	47	1353	94	1447	0.064962	0.0648723		0.9989	568.5	0.500397	567.999	1.00079	569	0.00175886	0.0049424
		0.4011	1401	47	1354	94	1448	0.0649171	0.0648723		0.9989	569.497	0.502941	568.994	1.00588	570	0.0017647	0.0049424
		0.401	1402	47	1355	94	1449	0.0648723	0.0648723		0.9989	570.495	0.505497	569.989	1.01099	571	0.00177057	0.0049424
		0.399	1402	48	1354	96	1450	0.0662069	0.0660702		0.9989	571.492	0.508065	570.984	1.01613	572	0.00177645	0.0049424
		0.395	1405	48	1357	96	1453	0.0660702	0.0660702		0.9989	572.489	0.510646	571.979	1.02129	573	0.00178236	0.0049424
		0.3929	1405	49	1356	98	1454	0.0674003	0.0673077		0.9989	573.487	0.51324	572.974	1.02648	574	0.00178829	0.0049424
		0.3928	1407	49	1358	98	1456	0.0673077	0.0673077		0.9989	574.484	0.515846	573.968	1.03169	575	0.00179425	0.0049424
		0.3924	1407	50	1357	100	1457	0.0686342	0.0684932		0.9988	575.482	0.518465	574.963	1.03693	576	0.00180023	0.00539219
		0.3911	1408	50	1358	100	1458	0.0685871	0.0684932		0.9988	576.479	0.521096	575.958	1.04219	577	0.00180623	0.00539219
		0.3908	1409	50	1359	100	1459	0.0685401	0.0684932		0.9988	577.476	0.523741	576.953	1.04748	578	0.00181225	0.00539219
		0.39	1410	50	1360	100	1460	0.0684932	0.0684932		0.9988	578.474	0.526398	577.947	1.0528	579	0.0018183	0.00539219
		0.3879	1411	51	1360	102	1462	0.0697674	0.0695771		0.9988	579.471	0.529068	578.942	1.05814	580	0.00182437	0.00539219
		0.3866	1412	51	1361	102	1463	0.0697198	0.0695771		0.9988	580.468	0.531751	579.936	1.0635	581	0.00183047	0.00539219
		0.3858	1413	51	1362	102	1464	0.0696721	0.0695771		0.9988	581.466	0.534447	580.931	1.06889	582	0.00183659	0.00539219
		0.3843	1414	51	1363	102	1465	0.0696246	0.0695771		0.9988	582.463	0.537156	581.926	1.07431	583	0.00184273	0.00539219
		0.3837	1415	51	1364	102	1466	0.0695771	0.0695771		0.9988	583.46	0.539879	582.92	1.07976	584	0.0018489	0.00539219
		0.381	1416	52	1364	104	1468	0.0708447	0.0707483		0.9988	584.457	0.542614	583.915	1.08523	585	0.00185509	0.00539219
		0.3809	1417	52	1365	104	1469	0.0707965	0.0707483		0.9988	585.455	0.545363	584.909	1.09073	586	0.00186131	0.00539219
		0.3801	1418	52	1366	104	1470	0.0707483	0.0707483		0.9988	586.452	0.548126	585.904	1.09625	587	0.00186755	0.00539219
		0.3798	1418	53	1365	106	1471	0.0720598	0.071962		0.9988	587.449	0.550902	586.898	1.1018	588	0.00187382	0.00539219
		0.3793	1419	53	1366	106	1472	0.0720109	0.071962		0.9987	588.446	0.553691	587.893	1.10738	589	0.00188011	0.00577279
		0.3791	1420	53	1367	106	1473	0.071962	0.071962		0.9987	589.444	0.556494	588.887	1.11299	590	0.00188642	0.00577279
		0.3772	1420	54	1366	108	1474	0.07327	0.072973		0.9987	590.441	0.559311	589.881	1.11862	591	0.00189276	0.00577279
		0.3771	1421	54	1367	108	1475	0.0732203	0.072973		0.9987	591.438	0.562142	590.876	1.12428	592	0.00189913	0.00577279
		0.3743	1422	54	1368	108	1476	0.0731707	0.072973		0.9987	592.435	0.564986	591.87	1.12997	593	0.00190552	0.00577279
		0.373	1423	54	1369	108	1477	0.0731212	0.072973		0.9987	593.432	0.567844	592.864	1.13569	594	0.00191193	0.00577279
		0.3709	1424	54	1370	108	1478	0.0730717	0.072973		0.9987	594.429	0.570717	593.859	1.14143	595	0.00191838	0.00577279
		0.37	1425	54	1371	108	1479	0.0730223	0.072973		0.9987	595.426	0.573603	594.853	1.14721	596	0.00192484	0.00577279
		0.3679	1426	54	1372	108	1480	0.072973	0.072973		0.9987	596.423	0.576504	595.847	1.15301	597	0.00193134	0.00577279
		0.3671	1426	55	1371	110	1481	0.0742741	0.074224		0.9987	597.421	0.579418	596.841	1.15884	598	0.00193785	0.00577279
		0.3668	1427	55	1372	110	1482	0.074224	0.074224		0.9987	598.418	0.582347	597.835	1.16469	599	0.0019444	0.00577279
		0.3651	1427	56	1371	112	1483	0.0755226	0.0747664		0.9987	599.415	0.585291	598.829	1.17058	600	0.00195097	0.00577279
		0.3643	1428	56	1372	112	1484	0.0754717	0.0747664		0.9987	600.412	0.588249	599.824	1.1765	601	0.00195757	0.00577279
		0.3635	1429	56	1373	112	1485	0.0754209	0.0747664		0.9987	601.409	0.591221	600.818	1.18244	602	0.00196419	0.00577279
		0.3628	1430	56	1374	112	1486	0.0753701	0.0747664		0.9987	602.406	0.594208	601.812	1.18842	603	0.00197084	0.00577279
		0.3624	1432	56	1376	112	1488	0.0752688	0.0747664		0.9986	603.403	0.59721	602.806	1.19442	604	0.00197752	0.00612244
		0.3623	1434	56	1378	112	1490	0.0751678	0.0747664		0.9986	604.4	0.600226	603.8	1.20045	605	0.00198422	0.00612244
		0.3614	1435	56	1379	112	1491	0.0751174	0.0747664		0.9986	605.397	0.603258	604.793	1.20652	606	0.00199095	0.00612244
		0.3589	1436	56	1380	112	1492	0.075067	0.0747664		0.9986	606.394	0.606304	605.787	1.21261	607	0.00199771	0.00612244
		0.3584	1437	56	1381	112	1493	0.0750167	0.0747664		0.9986	607.391	0.609365	606.781	1.21873	608	0.00200449	0.00612244
		0.3572	1438	56	1382	112	1494	0.0749665	0.0747664		0.9986	608.388	0.612441	607.775	1.22488	609	0.0020113	0.00612244
		0.3568	1439	56	1383	112	1495	0.0749164	0.0747664		0.9986	609.384	0.615533	608.769	1.23107	610	0.00201814	0.00612244
		0.3565	1440	56	1384	112	1496	0.0748663	0.0747664		0.9986	610.381	0.61864	609.763	1.23728	611	0.00202501	0.00612244
		0.3559	1442	56	1386	112	1498	0.0747664	0.0747664		0.9986	611.378	0.621762	610.756	1.24352	612	0.0020319	0.00612244
		0.3555	1442	58	1384	116	1500	0.0773333	0.0773333		0.9985	612.375	0.624899	611.75	1.2498	613	0.00203882	0.00655994
		0.354	1442	59	1383	118	1501	0.0786143	0.0785096		0.9985	613.372	0.628052	612.744	1.2561	614	0.00204577	0.00655994
		0.3532	1444	59	1385	118	1503	0.0785096	0.0785096		0.9985	614.369	0.631221	613.738	1.26244	615	0.00205275	0.00655994
		0.3525	1444	60	1384	120	1504	0.0797872	0.0797342		0.9985	615.366	0.634405	614.731	1.26881	616	0.00205976	0.00655994
		0.3522	1445	60	1385	120	1505	0.0797342	0.0797342		0.9985	616.362	0.637605	615.725	1.27521	617	0.00206679	0.00655994
		0.3518	1445	61	1384	122	1506	0.0810093	0.0806878		0.9985	617.359	0.64082	616.718	1.28164	618	0.00207385	0.00655994
		0.3515	1446	61	1385	122	1507	0.0809555	0.0806878		0.9985	618.356	0.644052	617.712	1.2881	619	0.00208094	0.00655994
		0.3512	1447	61	1386	122	1508	0.0809019	0.0806878		0.9985	619.353	0.6473	618.705	1.2946	620	0.00208806	0.00655994
		0.3503	1448	61	1387	122	1509	0.0808482	0.0806878		0.9985	620.349	0.650564	619.699	1.30113	621	0.00209521	0.00655994
		0.3502	1450	61	1389	122	1511	0.0807412	0.0806878		0.9985	621.346	0.653844	620.692	1.30769	622	0.00210239	0.00655994
		0.3477	1451	61	1390	122	1512	0.0806878	0.0806878		0.9985	622.343	0.65714	621.686	1.31428	623	0.0021096	0.00655994
		0.3473	1451	62	1389	124	1513	0.0819564	0.0819564		0.9985	623.34	0.660452	622.679	1.3209	624	0.00211683	0.00655994
		0.3471	1451	63	1388	126	1514	0.0832232	0.0831135		0.9985	624.336	0.663782	623.672	1.32756	625	0.0021241	0.00655994
		0.3469	1452	63	1389	126	1515	0.0831683	0.0831135		0.9985	625.333	0.667127	624.666	1.33425	626	0.0021314	0.00655994
		0.3466	1453	63	1390	126	1516	0.0831135	0.0831135		0.9985	626.33	0.670489	625.659	1.34098	627	0.00213872	0.00655994
		0.3451	1453	64	1389	128	1517	0.0843771	0.0839344		0.9985	627.326	0.673868	626.652	1.34774	628	0.00214608	0.00655994
		0.3449	1455	64	1391	128	1519	0.084266	0.0839344		0.9985	628.323	0.677264	627.645	1.35453	629	0.00215346	0.00655994
		0.3433	1456	64	1392	128	1520	0.0842105	0.0839344		0.9985	629.319	0.680677	628.639	1.36135	630	0.00216088	0.00655994
		0.3423	1457	64	1393	128	1521	0.0841552	0.0839344		0.9985	630.316	0.684106	629.632	1.36821	631	0.00216832	0.00655994
		0.3418	1458	64	1394	128	1522	0.0840999	0.0839344		0.9984	631.312	0.687553	630.625	1.37511	632	0.0021758	0.00699704
		0.3396	1459	64	1395	128	1523	0.0840446	0.0839344		0.9984	632.309	0.691017	631.618	1.38203	633	0.00218331	0.00699704
		0.3394	1460	64	1396	128	1524	0.0839895	0.0839344		0.9984	633.306	0.694498	632.611	1.389	634	0.00219085	0.00699704
		0.3385	1461	64	1397	128	1525	0.0839344	0.0839344		0.9984	634.302	0.697997	633.604	1.39599	635	0.00219841	0.00699704
		0.3368	1461	65	1396	130	1526	0.08519	0.0844156		0.9984	635.298	0.701512	634.597	1.40302	636	0.00220601	0.00699704
		0.3362	1462	65	1397	130	1527	0.0851343	0.0844156		0.9984	636.295	0.705046	635.59	1.41009	637	0.00221365	0.00699704
		0.3359	1464	65	1399	130	1529	0.0850229	0.0844156		0.9984	637.291	0.708597	636.583	1.41719	638	0.00222131	0.00699704
		0.3351	1465	65	1400	130	1530	0.0849673	0.0844156		0.9983	638.288	0.712166	637.576	1.42433	639	0.002229	0.00715571
		0.3344	1467	65	1402	130	1532	0.0848564	0.0844156		0.9983	639.284	0.715753	638.568	1.43151	640	0.00223673	0.00715571
		0.3341	1468	65	1403	130	1533	0.084801	0.0844156		0.9982	640.281	0.719358	639.561	1.43872	641	0.00224449	0.00720948
		0.3337	1470	65	1405	130	1535	0.0846906	0.0844156		0.9981	641.277	0.722981	640.554	1.44596	642	0.00225228	0.00724557
		0.3336	1473	65	1408	130	1538	0.0845254	0.0844156		0.998	642.273	0.726621	641.547	1.45324	643	0.0022601	0.00733666
		0.331	1474	65	1409	130	1539	0.0844704	0.0844156		0.998	643.27	0.730281	642.539	1.46056	644	0.00226795	0.00733666
		0.3309	1475	65	1410	130	1540	0.0844156	0.0844156		0.998	644.266	0.733958	643.532	1.46792	645	0.00227584	0.00733666
		0.3305	1475	66	1409	132	1541	0.0856587	0.0854922		0.998	645.262	0.737654	644.525	1.47531	646	0.00228376	0.00733666
		0.3304	1476	66	1410	132	1542	0.0856031	0.0854922		0.9979	646.259	0.741369	645.517	1.48274	647	0.00229171	0.00742901
		0.33	1477	66	1411	132	1543	0.0855476	0.0854922		0.9977	647.255	0.745102	646.51	1.4902	648	0.0022997	0.00775268
		0.3296	1478	66	1412	132	1544	0.0854922	0.0854922		0.9977	648.251	0.748854	647.502	1.49771	649	0.00230772	0.00775268
		0.3291	1478	67	1411	134	1545	0.0867314	0.0865074		0.9977	649.247	0.752624	648.495	1.50525	650	0.00231577	0.00775268
		0.3284	1479	67	1412	134	1546	0.0866753	0.0865074		0.9977	650.244	0.756414	649.487	1.51283	651	0.00232385	0.00775268
		0.3274	1480	67	1413	134	1547	0.0866193	0.0865074		0.9977	651.24	0.760223	650.48	1.52045	652	0.00233197	0.00775268
		0.3272	1482	67	1415	134	1549	0.0865074	0.0865074		0.9977	652.236	0.764051	651.472	1.5281	653	0.00234013	0.00775268
		0.3258	1482	68	1414	136	1550	0.0877419	0.0876289		0.9977	653.232	0.767898	652.464	1.5358	654	0.00234831	0.00775268
		0.3249	1483	68	1415	136	1551	0.0876854	0.0876289		0.9977	654.228	0.771765	653.456	1.54353	655	0.00235653	0.00775268
		0.3242	1484	68	1416	136	1552	0.0876289	0.0876289		0.9977	655.224	0.775651	654.449	1.5513	656	0.00236479	0.00775268
		0.321	1484	70	1414	140	1554	0.0900901	0.0900322		0.9977	656.22	0.779557	655.441	1.55911	657	0.00237308	0.00775268
		0.3189	1485	70	1415	140	1555	0.0900322	0.0900322		0.9977	657.217	0.783482	656.433	1.56696	658	0.0023814	0.00775268
		0.3187	1485	71	1414	142	1556	0.0912596	0.091201		0.9977	658.213	0.787427	657.425	1.57485	659	0.00238976	0.00775268
		0.3177	1486	71	1415	142	1557	0.091201	0.091201		0.9977	659.209	0.791392	658.417	1.58278	660	0.00239816	0.00775268
		0.3172	1486	72	1414	144	1558	0.0924262	0.0924262		0.9977	660.205	0.795378	659.409	1.59076	661	0.00240659	0.00775268
		0.3167	1486	73	1413	146	1559	0.0936498	0.0931122		0.9977	661.201	0.799383	660.401	1.59877	662	0.00241505	0.00775268
		0.3165	1487	73	1414	146	1560	0.0935897	0.0931122		0.9977	662.197	0.803408	661.393	1.60682	663	0.00242355	0.00775268
		0.3161	1488	73	1415	146	1561	0.0935298	0.0931122		0.9976	663.193	0.807454	662.385	1.61491	664	0.00243209	0.00809189
		0.315	1490	73	1417	146	1563	0.0934101	0.0931122		0.9975	664.188	0.811521	663.377	1.62304	665	0.00244066	0.00819473
		0.3146	1493	73	1420	146	1566	0.0932312	0.0931122		0.9975	665.184	0.815608	664.369	1.63122	666	0.00244927	0.00819473
		0.3143	1494	73	1421	146	1567	0.0931717	0.0931122		0.9975	666.18	0.819716	665.361	1.63943	667	0.00245792	0.00819473
		0.3135	1495	73	1422	146	1568	0.0931122	0.0931122		0.9975	667.176	0.823844	666.352	1.64769	668	0.0024666	0.00819473
		0.3121	1495	74	1421	148	1569	0.0943276	0.0941476		0.9974	668.172	0.827994	667.344	1.65599	669	0.00247532	0.008299
		0.3108	1496	74	1422	148	1570	0.0942675	0.0941476		0.9973	669.168	0.832164	668.336	1.66433	670	0.00248407	0.00836226
		0.3102	1497	74	1423	148	1571	0.0942075	0.0941476		0.9973	670.164	0.836356	669.327	1.67271	671	0.00249286	0.00836226
		0.3099	1498	74	1424	148	1572	0.0941476	0.0941476		0.9972	671.159	0.840569	670.319	1.68114	672	0.00250169	0.00842605
		0.3092	1499	75	1424	150	1574	0.0952986	0.0951777		0.9971	672.155	0.844803	671.31	1.68961	673	0.00251056	0.00846888
		0.3089	1500	75	1425	150	1575	0.0952381	0.0951777		0.9969	673.151	0.849059	672.302	1.69812	674	0.00251946	0.00853356
		0.3086	1501	75	1426	150	1576	0.0951777	0.0951777		0.9969	674.147	0.853337	673.293	1.70667	675	0.00252841	0.00853356
		0.3064	1501	76	1425	152	1577	0.0963855	0.0962025		0.9968	675.142	0.857636	674.285	1.71527	676	0.00253739	0.00862065
		0.3041	1502	76	1426	152	1578	0.0963245	0.0962025		0.9968	676.138	0.861958	675.276	1.72392	677	0.0025464	0.00862065
		0.3039	1503	76	1427	152	1579	0.0962635	0.0962025		0.9967	677.134	0.866301	676.267	1.7326	678	0.00255546	0.0086866
		0.3037	1504	76	1428	152	1580	0.0962025	0.0962025		0.9966	678.129	0.870666	677.259	1.74133	679	0.00256456	0.00873088
		0.3007	1504	77	1427	154	1581	0.0974067	0.0972836		0.9965	679.125	0.875054	678.25	1.75011	680	0.00257369	0.0087754
		0.3003	1505	77	1428	154	1582	0.0973451	0.0972836		0.9964	680.121	0.879464	679.241	1.75893	681	0.00258286	0.00882018
		0.3001	1506	77	1429	154	1583	0.0972836	0.0972836		0.9963	681.116	0.883897	680.232	1.76779	682	0.00259207	0.0088878
		0.299	1506	78	1428	156	1584	0.0984848	0.0982368		0.9963	682.112	0.888352	681.223	1.7767	683	0.00260132	0.0088878
		0.2983	1507	78	1429	156	1585	0.0984227	0.0982368		0.9962	683.107	0.89283	682.214	1.78566	684	0.00261061	0.008956
		0.2979	1508	78	1430	156	1586	0.0983607	0.0982368		0.9961	684.103	0.897331	683.205	1.79466	685	0.00261994	0.00902477
		0.2963	1509	78	1431	156	1587	0.0982987	0.0982368		0.9961	685.098	0.901855	684.196	1.80371	686	0.00262931	0.00902477
		0.2956	1510	78	1432	156	1588	0.0982368	0.0982368		0.996	686.094	0.906402	685.187	1.8128	687	0.00263872	0.00914067
		0.2955	1510	79	1431	158	1589	0.0994336	0.0994336		0.996	687.089	0.910972	686.178	1.82194	688	0.00264818	0.00914067
		0.2951	1510	80	1430	160	1590	0.100629	0.100313		0.996	688.084	0.915566	687.169	1.83113	689	0.00265767	0.00914067
		0.2924	1511	80	1431	160	1591	0.100566	0.100313		0.9959	689.08	0.920183	688.16	1.84037	690	0.0026672	0.0093774
		0.2917	1512	80	1432	160	1592	0.100503	0.100313		0.9959	690.075	0.924824	689.15	1.84965	691	0.00267677	0.0093774
		0.2895	1513	80	1433	160	1593	0.100439	0.100313		0.9959	691.071	0.929489	690.141	1.85898	692	0.00268638	0.0093774
		0.2879	1515	80	1435	160	1595	0.100313	0.100313		0.9959	692.066	0.934178	691.132	1.86836	693	0.00269604	0.0093774
		0.2876	1515	81	1434	162	1596	0.101504	0.101187		0.9959	693.061	0.938891	692.122	1.87778	694	0.00270574	0.0093774
		0.2863	1517	81	1436	162	1598	0.101377	0.101187		0.9959	694.056	0.943628	693.113	1.88726	695	0.00271547	0.0093774
		0.286	1518	81	1437	162	1599	0.101313	0.101187		0.9959	695.052	0.948389	694.103	1.89678	696	0.00272526	0.0093774
		0.2848	1519	81	1438	162	1600	0.10125	0.101187		0.9958	696.047	0.953175	695.094	1.90635	697	0.00273508	0.00959618
		0.2843	1520	81	1439	162	1601	0.101187	0.101187		0.9958	697.042	0.957985	696.084	1.91597	698	0.00274494	0.00959618
		0.2838	1520	82	1438	164	1602	0.102372	0.102372		0.9957	698.037	0.96282	697.074	1.92564	699	0.00275485	0.00969521
		0.2827	1520	83	1437	166	1603	0.103556	0.103298		0.9957	699.032	0.96768	698.065	1.93536	700	0.0027648	0.00969521
		0.2807	1521	83	1438	166	1604	0.103491	0.103298		0.9954	700.027	0.972565	699.055	1.94513	701	0.00277479	0.00979535
		0.2803	1522	83	1439	166	1605	0.103427	0.103298		0.9954	701.023	0.977476	700.045	1.95495	702	0.00278483	0.00979535
		0.2796	1523	83	1440	166	1606	0.103362	0.103298		0.9953	702.018	0.982411	701.035	1.96482	703	0.00279491	0.0100766
		0.2792	1524	83	1441	166	1607	0.103298	0.103298		0.9953	703.013	0.987372	702.025	1.97474	704	0.00280504	0.0100766
		0.2786	1524	84	1440	168	1608	0.104478	0.104154		0.9953	704.008	0.992359	703.015	1.98472	705	0.0028152	0.0100766
		0.2785	1525	84	1441	168	1609	0.104413	0.104154		0.9953	705.003	0.997371	704.005	1.99474	706	0.00282542	0.0100766
		0.2781	1526	84	1442	168	1610	0.104348	0.104154		0.9953	705.998	1.00241	704.995	2.00482	707	0.00283567	0.0100766
		0.2773	1527	84	1443	168	1611	0.104283	0.104154		0.9953	706.993	1.00747	705.985	2.01495	708	0.00284597	0.0100766
		0.2772	1528	84	1444	168	1612	0.104218	0.104154		0.9953	707.987	1.01256	706.975	2.02513	709	0.00285632	0.0100766
		0.2769	1529	84	1445	168	1613	0.104154	0.104154		0.9953	708.982	1.01768	707.965	2.03536	710	0.00286671	0.0100766
		0.2766	1529	85	1444	170	1614	0.105328	0.10468		0.9953	709.977	1.02282	708.954	2.04565	711	0.00287714	0.0100766
		0.2756	1531	85	1446	170	1616	0.105198	0.10468		0.9952	710.972	1.02799	709.944	2.05599	712	0.00288763	0.0103667
		0.2754	1532	85	1447	170	1617	0.105133	0.10468		0.9952	711.967	1.03319	710.934	2.06638	713	0.00289815	0.0103667
		0.2742	1533	85	1448	170	1618	0.105068	0.10468		0.9951	712.962	1.03842	711.923	2.07683	714	0.00290873	0.0104744
		0.2736	1534	85	1449	170	1619	0.105003	0.10468		0.9951	713.956	1.04367	712.913	2.08733	715	0.00291935	0.0104744
		0.2734	1536	85	1451	170	1621	0.104874	0.10468		0.995	714.951	1.04894	713.902	2.09789	716	0.00293001	0.010556
		0.2731	1537	85	1452	170	1622	0.104809	0.10468		0.9949	715.946	1.05425	714.892	2.1085	717	0.00294072	0.0106659
		0.2721	1539	85	1454	170	1624	0.10468	0.10468		0.9949	716.94	1.05958	715.881	2.11916	718	0.00295148	0.0106659
		0.2716	1539	86	1453	172	1625	0.105846	0.105716		0.9949	717.935	1.06494	716.87	2.12989	719	0.00296229	0.0106659
		0.2708	1540	86	1454	172	1626	0.105781	0.105716		0.9948	718.93	1.07033	717.859	2.14066	720	0.00297314	0.010777
		0.2707	1541	86	1455	172	1627	0.105716	0.105716		0.9947	719.924	1.07575	718.849	2.1515	721	0.00298404	0.0108894
		0.27	1541	87	1454	174	1628	0.10688	0.106814		0.9947	720.919	1.08119	719.838	2.16239	722	0.00299499	0.0108894
		0.2695	1542	87	1455	174	1629	0.106814	0.106814		0.9947	721.913	1.08667	720.827	2.17333	723	0.00300599	0.0108894
		0.269	1542	88	1454	176	1630	0.107975	0.107843		0.9946	722.908	1.09217	721.816	2.18433	724	0.00301704	0.0110031
		0.2688	1543	88	1455	176	1631	0.107909	0.107843		0.9945	723.902	1.0977	722.805	2.1954	725	0.00302813	0.0110604
		0.2684	1544	88	1456	176	1632	0.107843	0.107843		0.9943	724.897	1.10326	723.793	2.20651	726	0.00303927	0.0111469
		0.2678	1544	89	1455	178	1633	0.109002	0.108935		0.9943	725.891	1.10884	724.782	2.21769	727	0.00305047	0.0111469
		0.2677	1545	89	1456	178	1634	0.108935	0.108935		0.9941	726.886	1.11446	725.771	2.22892	728	0.00306171	0.0114111
		0.2668	1545	90	1455	180	1635	0.110092	0.109689		0.9941	727.88	1.12011	726.76	2.24022	729	0.003073	0.0114111
		0.2663	1546	90	1456	180	1636	0.110024	0.109689		0.9941	728.874	1.12578	727.748	2.25157	730	0.00308434	0.0114111
		0.2656	1547	90	1457	180	1637	0.109957	0.109689		0.9941	729.869	1.13149	728.737	2.26298	731	0.00309573	0.0114111
		0.2654	1548	90	1458	180	1638	0.10989	0.109689		0.9941	730.863	1.13723	729.726	2.27445	732	0.00310717	0.0114111
		0.2652	1549	90	1459	180	1639	0.109823	0.109689		0.9941	731.857	1.14299	730.714	2.28598	733	0.00311866	0.0114111
		0.265	1551	90	1461	180	1641	0.109689	0.109689		0.9941	732.851	1.14879	731.702	2.29757	734	0.00313021	0.0114111
		0.2638	1551	91	1460	182	1642	0.11084	0.110706		0.994	733.845	1.15461	732.691	2.30922	735	0.0031418	0.0116821
		0.2635	1552	91	1461	182	1643	0.110773	0.110706		0.994	734.84	1.16047	733.679	2.32094	736	0.00315345	0.0116821
		0.2632	1553	91	1462	182	1644	0.110706	0.110706		0.9938	735.834	1.16636	734.667	2.33271	737	0.00316514	0.0118048
		0.263	1553	92	1461	184	1645	0.111854	0.111583		0.9938	736.828	1.17227	735.655	2.34455	738	0.00317689	0.0118048
		0.2625	1554	92	1462	184	1646	0.111786	0.111583		0.9937	737.822	1.17822	736.644	2.35644	739	0.00318869	0.0118977
		0.262	1556	92	1464	184	1648	0.11165	0.111583		0.9936	738.816	1.1842	737.632	2.3684	740	0.00320055	0.0119914
		0.2616	1557	92	1465	184	1649	0.111583	0.111583		0.9936	739.81	1.19021	738.62	2.38043	741	0.00321245	0.0119914
		0.2599	1557	93	1464	186	1650	0.112727	0.112727		0.9935	740.804	1.19626	739.607	2.39251	742	0.00322441	0.0120859
		0.259	1557	94	1463	188	1651	0.11387	0.113801		0.9934	741.798	1.20233	740.595	2.40466	743	0.00323642	0.0121494
		0.2585	1558	94	1464	188	1652	0.113801	0.113801		0.9931	742.792	1.20844	741.583	2.41688	744	0.00324849	0.0122132
		0.2554	1558	95	1463	190	1653	0.114943	0.114943		0.993	743.785	1.21458	742.571	2.42915	745	0.00326061	0.0123096
		0.2549	1558	96	1462	192	1654	0.116082	0.116082		0.993	744.779	1.22075	743.559	2.44149	746	0.00327278	0.0123096
		0.2544	1558	97	1461	194	1655	0.117221	0.11715		0.9928	745.773	1.22695	744.546	2.4539	747	0.00328501	0.0124068
		0.2539	1559	97	1462	194	1656	0.11715	0.11715		0.9926	746.767	1.23319	745.534	2.46637	748	0.00329729	0.0124721
		0.2531	1559	98	1461	196	1657	0.118286	0.118286		0.9925	747.761	1.23946	746.521	2.47891	749	0.00330963	0.0127036
		0.2525	1559	99	1460	198	1658	0.119421	0.119421		0.9925	748.754	1.24576	747.508	2.49152	750	0.00332202	0.0127036
		0.2516	1559	100	1459	200	1659	0.120555	0.120555		0.9925	749.748	1.25209	748.496	2.50419	751	0.00333447	0.0127036
		0.2501	1559	102	1457	204	1661	0.122818	0.122523		0.9925	750.742	1.25846	749.483	2.51692	752	0.00334697	0.0127036
		0.2494	1560	102	1458	204	1662	0.122744	0.122523		0.9925	751.735	1.26486	750.47	2.52973	753	0.00335953	0.0127036
		0.2491	1561	102	1459	204	1663	0.12267	0.122523		0.9925	752.729	1.2713	751.457	2.5426	754	0.00337215	0.0127036
		0.2478	1563	102	1461	204	1665	0.122523	0.122523		0.9924	753.722	1.27777	752.444	2.55554	755	0.00338482	0.0131112
		0.2474	1564	103	1461	206	1667	0.123575	0.123353		0.9924	754.716	1.28427	753.431	2.56855	756	0.00339755	0.0131112
		0.247	1566	103	1463	206	1669	0.123427	0.123353		0.9924	755.709	1.29081	754.418	2.58162	757	0.00341033	0.0131112
		0.246	1567	103	1464	206	1670	0.123353	0.123353		0.9924	756.703	1.29738	755.405	2.59477	758	0.00342318	0.0131112
		0.2442	1567	104	1463	208	1671	0.124476	0.124476		0.9924	757.696	1.30399	756.392	2.60798	759	0.00343608	0.0131112
		0.2433	1567	105	1462	210	1672	0.125598	0.125448		0.9924	758.689	1.31063	757.379	2.62127	760	0.00344904	0.0131112
		0.242	1568	105	1463	210	1673	0.125523	0.125448		0.9923	759.683	1.31731	758.365	2.63462	761	0.00346206	0.0133907
		0.2417	1569	105	1464	210	1674	0.125448	0.125448		0.9923	760.676	1.32403	759.352	2.64805	762	0.00347513	0.0133907
		0.2413	1570	106	1464	212	1676	0.126492	0.126492		0.9922	761.669	1.33077	760.338	2.66155	763	0.00348827	0.0135329
		0.2411	1570	107	1463	214	1677	0.127609	0.127457		0.9922	762.662	1.33756	761.325	2.67512	764	0.00350146	0.0135329
		0.2406	1571	107	1464	214	1678	0.127533	0.127457		0.9921	763.656	1.34438	762.311	2.68876	765	0.00351471	0.0136406
		0.2405	1572	107	1465	214	1679	0.127457	0.127457		0.992	764.649	1.35123	763.298	2.70247	766	0.00352803	0.0137492
		0.2404	1572	108	1464	216	1680	0.128571	0.128571		0.992	765.642	1.35813	764.284	2.71626	767	0.0035414	0.0137492
		0.2397	1572	109	1463	218	1681	0.129685	0.129454		0.9919	766.635	1.36506	765.27	2.73011	768	0.00355484	0.0138955
		0.2393	1573	109	1464	218	1682	0.129608	0.129454		0.9919	767.628	1.37202	766.256	2.74405	769	0.00356833	0.0138955
		0.239	1574	109	1465	218	1683	0.129531	0.129454		0.9918	768.621	1.37903	767.242	2.75805	770	0.00358189	0.0140063
		0.2379	1575	109	1466	218	1684	0.129454	0.129454		0.9917	769.614	1.38607	768.228	2.77213	771	0.0035955	0.0145748
		0.2376	1575	110	1465	220	1685	0.130564	0.130564		0.9917	770.607	1.39314	769.214	2.78629	772	0.00360918	0.0145748
		0.2369	1575	111	1464	222	1686	0.131673	0.131595		0.9917	771.6	1.40026	770.199	2.80052	773	0.00362292	0.0145748
		0.2367	1576	111	1465	222	1687	0.131595	0.131595		0.9917	772.593	1.40741	771.185	2.81483	774	0.00363673	0.0145748
		0.2366	1576	112	1464	224	1688	0.132701	0.132623		0.9917	773.585	1.4146	772.171	2.82921	775	0.00365059	0.0145748
		0.236	1577	112	1465	224	1689	0.132623	0.132623		0.9917	774.578	1.42183	773.156	2.84367	776	0.00366452	0.0145748
		0.2349	1578	113	1465	226	1691	0.133649	0.13357		0.9917	775.571	1.4291	774.142	2.8582	777	0.00367851	0.0145748
		0.2338	1579	113	1466	226	1692	0.13357	0.13357		0.9917	776.564	1.43641	775.127	2.87282	778	0.00369257	0.0145748
		0.2337	1579	115	1464	230	1694	0.135773	0.135613		0.9917	777.556	1.44375	776.112	2.88751	779	0.00370669	0.0145748
		0.2334	1580	115	1465	230	1695	0.135693	0.135613		0.9917	778.549	1.45114	777.098	2.90228	780	0.00372087	0.0145748
		0.2324	1581	115	1466	230	1696	0.135613	0.135613		0.9917	779.541	1.45856	778.083	2.91713	781	0.00373512	0.0145748
		0.2321	1581	116	1465	232	1697	0.136712	0.136631		0.9917	780.534	1.46603	779.068	2.93206	782	0.00374943	0.0145748
		0.2319	1582	116	1466	232	1698	0.136631	0.136631		0.9917	781.526	1.47353	780.053	2.94706	783	0.00376381	0.0145748
		0.2309	1584	117	1467	234	1701	0.137566	0.137163		0.9917	782.519	1.48108	781.038	2.96215	784	0.00377825	0.0145748
		0.2304	1585	117	1468	234	1702	0.137485	0.137163		0.9916	783.511	1.48866	782.023	2.97732	785	0.00379276	0.0151681
		0.2303	1586	117	1469	234	1703	0.137405	0.137163		0.9913	784.504	1.49628	783.007	2.99257	786	0.00380734	0.0152899
		0.2302	1587	117	1470	234	1704	0.137324	0.137163		0.9913	785.496	1.50395	783.992	3.0079	787	0.00382198	0.0152899
		0.2294	1588	117	1471	234	1705	0.137243	0.137163		0.9911	786.488	1.51166	784.977	3.02331	788	0.00383669	0.0154127
		0.2292	1589	117	1472	234	1706	0.137163	0.137163		0.991	787.481	1.5194	785.961	3.03881	789	0.00385147	0.0155365
		0.229	1589	118	1471	236	1707	0.138254	0.138092		0.991	788.473	1.52719	786.946	3.05438	790	0.00386631	0.0155365
		0.2289	1590	118	1472	236	1708	0.138173	0.138092		0.9909	789.465	1.53502	787.93	3.07005	791	0.00388122	0.0159998
		0.2287	1591	118	1473	236	1709	0.138092	0.138092		0.9909	790.457	1.5429	788.914	3.08579	792	0.0038962	0.0159998
		0.2275	1591	119	1472	238	1710	0.139181	0.139181		0.9909	791.449	1.55081	789.898	3.10162	793	0.00391125	0.0159998
		0.2271	1592	120	1472	240	1712	0.140187	0.140023		0.9909	792.441	1.55877	790.882	3.11754	794	0.00392637	0.0159998
		0.227	1593	120	1473	240	1713	0.140105	0.140023		0.9909	793.433	1.56677	791.866	3.13354	795	0.00394155	0.0159998
		0.2267	1594	120	1474	240	1714	0.140023	0.140023		0.9909	794.425	1.57481	792.85	3.14962	796	0.00395681	0.0159998
		0.226	1594	121	1473	242	1715	0.141108	0.14078		0.9909	795.417	1.5829	793.834	3.16579	797	0.00397214	0.0159998
		0.2244	1595	121	1474	242	1716	0.141026	0.14078		0.9909	796.409	1.59103	794.818	3.18205	798	0.00398753	0.0159998
		0.2243	1596	121	1475	242	1717	0.140944	0.14078		0.9909	797.401	1.5992	795.802	3.1984	799	0.004003	0.0159998
		0.2239	1597	121	1476	242	1718	0.140861	0.14078		0.9908	798.393	1.60742	796.785	3.21483	800	0.00401854	0.0164338
		0.2238	1598	121	1477	242	1719	0.14078	0.14078		0.9907	799.384	1.61568	797.769	3.23135	801	0.00403415	0.0165221
		0.2237	1598	122	1476	244	1720	0.14186	0.14186		0.9906	800.376	1.62398	798.752	3.24796	802	0.00404983	0.0182991
		0.2228	1598	123	1475	246	1721	0.14294	0.142691		0.9906	801.368	1.63233	799.735	3.26466	803	0.00406559	0.0182991
		0.2223	1599	123	1476	246	1722	0.142857	0.142691		0.9906	802.359	1.64073	800.719	3.28145	804	0.00408141	0.0182991
		0.2221	1600	123	1477	246	1723	0.142774	0.142691		0.9906	803.351	1.64917	801.702	3.29834	805	0.00409731	0.0182991
		0.2214	1601	123	1478	246	1724	0.142691	0.142691		0.9906	804.342	1.65765	802.685	3.31531	806	0.00411328	0.0182991
		0.2201	1601	124	1477	248	1725	0.143768	0.143768		0.9906	805.334	1.66618	803.668	3.33237	807	0.00412933	0.0182991
		0.2199	1601	125	1476	250	1726	0.144844	0.14476		0.9906	806.325	1.67476	804.65	3.34952	808	0.00414545	0.0182991
		0.2195	1602	125	1477	250	1727	0.14476	0.14476		0.9906	807.317	1.68339	805.633	3.36677	809	0.00416164	0.0182991
		0.2194	1602	126	1476	252	1728	0.145833	0.145749		0.9906	808.308	1.69206	806.616	3.38411	810	0.00417791	0.0182991
		0.2189	1603	126	1477	252	1729	0.145749	0.145749		0.9906	809.299	1.70077	807.598	3.40154	811	0.00419426	0.0182991
		0.2182	1604	127	1477	254	1731	0.146736	0.146482		0.9906	810.29	1.70954	808.581	3.41907	812	0.00421068	0.0182991
		0.2174	1606	127	1479	254	1733	0.146567	0.146482		0.9906	811.282	1.71835	809.563	3.43669	813	0.00422717	0.0182991
		0.2172	1607	127	1480	254	1734	0.146482	0.146482		0.9906	812.273	1.7272	810.546	3.45441	814	0.00424375	0.0182991
		0.2171	1607	128	1479	256	1735	0.14755	0.147296		0.9906	813.264	1.73611	811.528	3.47222	815	0.0042604	0.0182991
		0.217	1608	128	1480	256	1736	0.147465	0.147296		0.9906	814.255	1.74507	812.51	3.49013	816	0.00427712	0.0182991
		0.2166	1609	128	1481	256	1737	0.147381	0.147296		0.9906	815.246	1.75407	813.492	3.50814	817	0.00429393	0.0182991
		0.2153	1610	128	1482	256	1738	0.147296	0.147296		0.9906	816.237	1.76312	814.474	3.52624	818	0.00431081	0.0182991
		0.2149	1610	129	1481	258	1739	0.148361	0.148106		0.9906	817.228	1.77222	815.456	3.54444	819	0.00432777	0.0182991
		0.2145	1611	129	1482	258	1740	0.148276	0.148106		0.9906	818.219	1.78137	816.437	3.56274	820	0.0043448	0.0182991
		0.2143	1612	129	1483	258	1741	0.148191	0.148106		0.9906	819.209	1.79057	817.419	3.58114	821	0.00436192	0.0182991
		0.2135	1613	129	1484	258	1742	0.148106	0.148106		0.9906	820.2	1.79982	818.4	3.59964	822	0.00437912	0.0182991
		0.2133	1613	130	1483	260	1743	0.149168	0.149168		0.9906	821.191	1.80912	819.382	3.61823	823	0.0043964	0.0182991
		0.2126	1613	131	1482	262	1744	0.150229	0.149971		0.9906	822.182	1.81847	820.363	3.63693	824	0.00441375	0.0182991
		0.2125	1615	131	1484	262	1746	0.150057	0.149971		0.9906	823.172	1.82787	821.344	3.65573	825	0.00443119	0.0182991
		0.2124	1616	131	1485	262	1747	0.149971	0.149971		0.9906	824.163	1.83732	822.325	3.67463	826	0.00444871	0.0182991
		0.2119	1616	132	1484	264	1748	0.15103	0.150685		0.9906	825.153	1.84682	823.306	3.69364	827	0.00446631	0.0182991
		0.2117	1617	132	1485	264	1749	0.150943	0.150685		0.9906	826.144	1.85637	824.287	3.71274	828	0.00448399	0.0182991
		0.2111	1618	132	1486	264	1750	0.150857	0.150685		0.9906	827.134	1.86598	825.268	3.73196	829	0.00450176	0.0182991
		0.2109	1619	132	1487	264	1751	0.150771	0.150685		0.9906	828.124	1.87564	826.249	3.75127	830	0.0045196	0.0182991
		0.2101	1620	132	1488	264	1752	0.150685	0.150685		0.9906	829.115	1.88535	827.229	3.77069	831	0.00453753	0.0182991
		0.2086	1620	133	1487	266	1753	0.15174	0.151394		0.9906	830.105	1.89511	828.21	3.79022	832	0.00455555	0.0182991
		0.208	1621	133	1488	266	1754	0.151653	0.151394		0.9906	831.095	1.90492	829.19	3.80985	833	0.00457365	0.0182991
		0.2078	1622	133	1489	266	1755	0.151567	0.151394		0.9906	832.085	1.91479	830.17	3.82958	834	0.00459183	0.0182991
		0.2071	1624	133	1491	266	1757	0.151394	0.151394		0.9906	833.075	1.92471	831.151	3.84943	835	0.00461009	0.0182991
		0.2069	1624	134	1490	268	1758	0.152446	0.152014		0.9906	834.065	1.93469	832.131	3.86938	836	0.00462845	0.0182991
		0.2065	1625	134	1491	268	1759	0.152359	0.152014		0.9906	835.055	1.94472	833.111	3.88944	837	0.00464689	0.0182991
		0.2052	1626	134	1492	268	1760	0.152273	0.152014		0.9906	836.045	1.95481	834.09	3.90961	838	0.00466541	0.0182991
		0.2051	1627	134	1493	268	1761	0.152186	0.152014		0.9901	837.035	1.96495	835.07	3.92989	839	0.00468402	0.0202801
		0.205	1628	134	1494	268	1762	0.1521	0.152014		0.9899	838.025	1.97514	836.05	3.95028	840	0.00470272	0.0208382
		0.2042	1629	134	1495	268	1763	0.152014	0.152014		0.9899	839.015	1.98539	837.029	3.97079	841	0.00472151	0.0208382
		0.2032	1629	135	1494	270	1764	0.153061	0.152975		0.9899	840.004	1.9957	838.009	3.9914	842	0.00474038	0.0208382
		0.2024	1630	135	1495	270	1765	0.152975	0.152975		0.9899	840.994	2.00606	838.988	4.01212	843	0.00475934	0.0208382
		0.2016	1630	137	1493	274	1767	0.155065	0.15489		0.9899	841.984	2.01648	839.967	4.03296	844	0.00477839	0.0208382
		0.2015	1632	137	1495	274	1769	0.15489	0.15489		0.9899	842.973	2.02696	840.946	4.05391	845	0.00479753	0.0208382
		0.2014	1632	138	1494	276	1770	0.155932	0.155932		0.9899	843.963	2.03749	841.925	4.07498	846	0.00481676	0.0208382
		0.2013	1633	139	1494	278	1772	0.156885	0.156885		0.9899	844.952	2.04808	842.904	4.09616	847	0.00483608	0.0208382
		0.2012	1633	140	1493	280	1773	0.157924	0.157392		0.9899	845.941	2.05873	843.883	4.11746	848	0.00485549	0.0208382
		0.2003	1634	140	1494	280	1774	0.157835	0.157392		0.9898	846.931	2.06943	844.861	4.13887	849	0.00487499	0.0214124
		0.1998	1635	140	1495	280	1775	0.157746	0.157392		0.9896	847.92	2.0802	845.84	4.1604	850	0.00489459	0.0215292
		0.1994	1637	140	1497	280	1777	0.157569	0.157392		0.9895	848.909	2.09102	846.818	4.18205	851	0.00491427	0.0216467
		0.1982	1638	140	1498	280	1778	0.15748	0.157392		0.9892	849.898	2.10191	847.796	4.20381	852	0.00493405	0.0217649
		0.198	1639	140	1499	280	1779	0.157392	0.157392		0.9888	850.887	2.11285	848.774	4.22569	853	0.00495392	0.0218838
		0.1979	1639	141	1498	282	1780	0.158427	0.158427		0.9885	851.876	2.12385	849.752	4.2477	854	0.00497389	0.0221839
		0.1969	1639	142	1497	284	1781	0.159461	0.159104		0.9885	852.865	2.13491	850.73	4.26982	855	0.00499394	0.0221839
		0.1968	1640	142	1498	284	1782	0.159371	0.159104		0.9885	853.854	2.14603	851.708	4.29207	856	0.0050141	0.0221839
		0.1967	1641	142	1499	284	1783	0.159282	0.159104		0.9885	854.843	2.15722	852.686	4.31443	857	0.00503434	0.0221839
		0.1966	1642	142	1500	284	1784	0.159193	0.159104		0.9881	855.832	2.16846	853.663	4.33692	858	0.00505469	0.0224883
		0.1962	1643	142	1501	284	1785	0.159104	0.159104		0.9877	856.82	2.17977	854.64	4.35953	859	0.00507512	0.0226113
		0.194	1643	143	1500	286	1786	0.160134	0.159777		0.9874	857.809	2.19113	855.618	4.38227	860	0.00509566	0.022735
		0.1938	1644	143	1501	286	1787	0.160045	0.159777		0.9873	858.797	2.20256	856.595	4.40513	861	0.00511629	0.0228594
		0.1935	1645	143	1502	286	1788	0.159955	0.159777		0.9872	859.786	2.21406	857.572	4.42811	862	0.00513702	0.0229845
		0.1933	1647	143	1504	286	1790	0.159777	0.159777		0.9868	860.774	2.22561	858.549	4.45122	863	0.00515785	0.0231103
		0.193	1647	144	1503	288	1791	0.160804	0.160804		0.9867	861.763	2.23723	859.526	4.47446	864	0.00517877	0.0232369
		0.1926	1647	145	1502	290	1792	0.16183	0.16183		0.9853	862.751	2.24891	860.502	4.49782	865	0.00519979	0.0233642
		0.1924	1648	146	1502	292	1794	0.162765	0.162312		0.9847	863.739	2.26066	861.479	4.52131	866	0.00522092	0.0234922
		0.1922	1650	146	1504	292	1796	0.162584	0.162312		0.9843	864.728	2.27247	862.455	4.54494	867	0.00524214	0.0236209
		0.1916	1652	146	1506	292	1798	0.162403	0.162312		0.9841	865.716	2.28434	863.431	4.56869	868	0.00526346	0.0237504
		0.1912	1653	146	1507	292	1799	0.162312	0.162312		0.984	866.704	2.29628	864.407	4.59257	869	0.00528489	0.0238806
		0.1911	1654	147	1507	294	1801	0.163243	0.163243		0.9835	867.692	2.30829	865.383	4.61658	870	0.00530641	0.0240116
		0.1902	1654	148	1506	296	1802	0.164262	0.16408		0.9834	868.68	2.32036	866.359	4.64072	871	0.00532804	0.0241433
		0.1894	1655	148	1507	296	1803	0.164171	0.16408		0.9832	869.668	2.3325	867.335	4.665	872	0.00534977	0.0242757
		0.1889	1656	148	1508	296	1804	0.16408	0.16408		0.9831	870.655	2.3447	868.311	4.68941	873	0.0053716	0.0244089
		0.1886	1656	149	1507	298	1805	0.165097	0.165097		0.983	871.643	2.35697	869.286	4.71395	874	0.00539353	0.0245429
		0.1881	1656	150	1506	300	1806	0.166113	0.165929		0.9829	872.631	2.36931	870.261	4.73863	875	0.00541557	0.0246777
		0.1875	1657	150	1507	300	1807	0.166021	0.165929		0.982	873.618	2.38172	871.237	4.76344	876	0.00543772	0.0248132
		0.1872	1658	150	1508	300	1808	0.165929	0.165929		0.9819	874.606	2.39419	872.212	4.78839	877	0.00545996	0.0249495
		0.1871	1658	151	1507	302	1809	0.166943	0.166943		0.9814	875.593	2.40674	873.187	4.81348	878	0.00548232	0.0250865
		0.1869	1658	152	1506	304	1810	0.167956	0.167863		0.9811	876.581	2.41935	874.161	4.8387	879	0.00550478	0.0252244
		0.1868	1659	152	1507	304	1811	0.167863	0.167863		0.9804	877.568	2.43203	875.136	4.86406	880	0.00552734	0.025363
		0.1867	1659	153	1506	306	1812	0.168874	0.168595		0.9791	878.555	2.44478	876.11	4.88957	881	0.00555002	0.0255025
		0.1864	1661	153	1508	306	1814	0.168688	0.168595		0.979	879.542	2.4576	877.085	4.91521	882	0.0055728	0.0256427
		0.1863	1662	153	1509	306	1815	0.168595	0.168595		0.9788	880.53	2.4705	878.059	4.94099	883	0.00559569	0.0257837
		0.1857	1662	154	1508	308	1816	0.169604	0.169604		0.9787	881.517	2.48346	879.033	4.96692	884	0.00561869	0.0259256
		0.1856	1662	155	1507	310	1817	0.170611	0.170611		0.9774	882.504	2.49649	880.007	4.99299	885	0.00564179	0.0262117
		0.1854	1662	157	1505	314	1819	0.172622	0.172622		0.9774	883.49	2.5096	880.981	5.0192	886	0.00566501	0.0262117
		0.1852	1662	158	1504	316	1820	0.173626	0.173626		0.9774	884.477	2.52278	881.954	5.04555	887	0.00568834	0.0262117
		0.1844	1662	159	1503	318	1821	0.174629	0.174438		0.977	885.464	2.53603	882.928	5.07205	888	0.00571177	0.0267202
		0.1841	1663	159	1504	318	1822	0.174533	0.174438		0.977	886.451	2.54935	883.901	5.0987	889	0.00573532	0.0267202
		0.184	1664	159	1505	318	1823	0.174438	0.174438		0.977	887.437	2.56275	884.875	5.1255	890	0.00575898	0.0267202
		0.1838	1664	160	1504	320	1824	0.175439	0.175439		0.977	888.424	2.57622	885.848	5.15244	891	0.00578276	0.0267202
		0.1829	1664	161	1503	322	1825	0.176438	0.176342		0.9769	889.41	2.58976	886.82	5.17953	892	0.00580664	0.0270897
		0.1828	1665	161	1504	322	1826	0.176342	0.176342		0.9761	890.397	2.60338	887.793	5.20677	893	0.00583064	0.027239
		0.182	1666	162	1504	324	1828	0.177243	0.176856		0.976	891.383	2.61708	888.766	5.23415	894	0.00585476	0.0273892
		0.1816	1667	162	1505	324	1829	0.177146	0.176856		0.9758	892.369	2.63085	889.738	5.2617	895	0.00587899	0.0275401
		0.1808	1669	162	1507	324	1831	0.176952	0.176856		0.975	893.355	2.64469	890.711	5.28939	896	0.00590333	0.0277682
		0.1804	1670	162	1508	324	1832	0.176856	0.176856		0.975	894.341	2.65862	891.683	5.31723	897	0.00592779	0.0277682
		0.1803	1670	163	1507	326	1833	0.177851	0.177657		0.9747	895.327	2.67262	892.655	5.34523	898	0.00595237	0.0282303
		0.1802	1672	163	1509	326	1835	0.177657	0.177657		0.9747	896.313	2.68669	893.627	5.37338	899	0.00597707	0.0282303
		0.18	1673	164	1509	328	1837	0.178552	0.177971		0.9747	897.299	2.70085	894.598	5.40169	900	0.00600188	0.0282303
		0.179	1675	164	1511	328	1839	0.178358	0.177971		0.9747	898.285	2.71508	895.57	5.43016	901	0.00602681	0.0282303
		0.1788	1676	164	1512	328	1840	0.178261	0.177971		0.9745	899.271	2.72939	896.541	5.45878	902	0.00605186	0.0286214
		0.1783	1677	164	1513	328	1841	0.178164	0.177971		0.9744	900.256	2.74378	897.512	5.48756	903	0.00607703	0.0287794
		0.1776	1678	164	1514	328	1842	0.178067	0.177971		0.9743	901.242	2.75825	898.484	5.51649	904	0.00610232	0.0289383
		0.1775	1679	164	1515	328	1843	0.177971	0.177971		0.9742	902.227	2.7728	899.454	5.54559	905	0.00612773	0.0290981
		0.1771	1679	165	1514	330	1844	0.178959	0.178862		0.9741	903.213	2.78743	900.425	5.57485	906	0.00615326	0.0292588
		0.1769	1680	165	1515	330	1845	0.178862	0.178862		0.9739	904.198	2.80214	901.396	5.60427	907	0.00617891	0.029583
		0.1768	1680	166	1514	332	1846	0.179848	0.179848		0.9739	905.183	2.81693	902.366	5.63386	908	0.00620469	0.029583
		0.1765	1680	167	1513	334	1847	0.180834	0.180736		0.9739	906.168	2.8318	903.336	5.6636	909	0.00623058	0.029583
		0.1759	1681	167	1514	334	1848	0.180736	0.180736		0.9724	907.153	2.84676	904.306	5.69351	910	0.00625661	0.0299108
		0.1754	1681	168	1513	336	1849	0.18172	0.18172		0.9722	908.138	2.86179	905.276	5.72359	911	0.00628275	0.0300762
		0.1751	1681	169	1512	338	1850	0.182703	0.182505		0.9717	909.123	2.87692	906.246	5.75383	912	0.00630903	0.0302424
		0.175	1682	169	1513	338	1851	0.182604	0.182505		0.9716	910.108	2.89212	907.216	5.78424	913	0.00633542	0.0304936
		0.1748	1683	169	1514	338	1852	0.182505	0.182505		0.9716	911.093	2.90741	908.185	5.81482	914	0.00636195	0.0304936
		0.1743	1683	170	1513	340	1853	0.183486	0.182697		0.9715	912.077	2.92278	909.154	5.84557	915	0.0063886	0.0307469
		0.1741	1684	170	1514	340	1854	0.183387	0.182697		0.9714	913.062	2.93824	910.124	5.87648	916	0.00641537	0.0310024
		0.174	1685	170	1515	340	1855	0.183288	0.182697		0.9714	914.046	2.95379	911.092	5.90757	917	0.00644228	0.0310024
		0.1737	1687	170	1517	340	1857	0.183091	0.182697		0.9713	915.031	2.96942	912.061	5.93883	918	0.00646931	0.03126
		0.1731	1688	170	1518	340	1858	0.182992	0.182697		0.9697	916.015	2.98513	913.03	5.97026	919	0.00649648	0.0316943
		0.1726	1690	170	1520	340	1860	0.182796	0.182697		0.9697	916.999	3.00094	913.998	6.00187	920	0.00652377	0.0316943
		0.1725	1691	170	1521	340	1861	0.182697	0.182697		0.9697	917.983	3.01683	914.966	6.03365	921	0.0065512	0.0316943
		0.1722	1691	172	1519	344	1863	0.184648	0.18445		0.9697	918.967	3.03281	915.934	6.06561	922	0.00657875	0.0316943
		0.1719	1693	172	1521	344	1865	0.18445	0.18445		0.9695	919.951	3.04887	916.902	6.09775	923	0.00660644	0.0322236
		0.1714	1693	173	1520	346	1866	0.185423	0.184829		0.9695	920.935	3.06503	917.87	6.13006	924	0.00663426	0.0322236
		0.1713	1694	173	1521	346	1867	0.185324	0.184829		0.9694	921.919	3.08127	918.837	6.16255	925	0.00666222	0.0325815
		0.1711	1695	173	1522	346	1868	0.185225	0.184829		0.9694	922.902	3.09761	919.805	6.19522	926	0.0066903	0.0325815
		0.171	1696	173	1523	346	1869	0.185126	0.184829		0.9685	923.886	3.11404	920.772	6.22807	927	0.00671853	0.0328525
		0.1704	1698	173	1525	346	1871	0.184928	0.184829		0.9684	924.869	3.13055	921.739	6.26111	928	0.00674688	0.0330345
		0.1701	1699	173	1526	346	1872	0.184829	0.184829		0.9681	925.853	3.14716	922.706	6.29433	929	0.00677538	0.0332176
		0.17	1700	174	1526	348	1874	0.185699	0.185699		0.968	926.836	3.16386	923.672	6.32773	930	0.00680401	0.0334016
		0.1695	1700	175	1525	350	1875	0.186667	0.186567		0.9679	927.819	3.18066	924.639	6.36131	931	0.00683278	0.0336796
		0.1694	1701	175	1526	350	1876	0.186567	0.186567		0.9679	928.802	3.19754	925.605	6.39509	932	0.00686168	0.0336796
		0.1693	1701	176	1525	352	1877	0.187533	0.187533		0.9678	929.785	3.21452	926.571	6.42905	933	0.00689073	0.034054
		0.169	1701	177	1524	354	1878	0.188498	0.188098		0.9678	930.768	3.2316	927.537	6.4632	934	0.00691991	0.034054
		0.1689	1703	177	1526	354	1880	0.188298	0.188098		0.9668	931.751	3.24877	928.502	6.49753	935	0.00694923	0.0343375
		0.1686	1704	177	1527	354	1881	0.188198	0.188098		0.9667	932.734	3.26603	929.468	6.53206	936	0.0069787	0.0345279
		0.1683	1705	177	1528	354	1882	0.188098	0.188098		0.9658	933.717	3.28339	930.433	6.56678	937	0.0070083	0.0347194
		0.1679	1705	178	1527	356	1883	0.18906	0.18846		0.9657	934.699	3.30085	931.398	6.60169	938	0.00703805	0.0349119
		0.1676	1706	178	1528	356	1884	0.18896	0.18846		0.9652	935.682	3.3184	932.363	6.6368	939	0.00706794	0.0352027
		0.1675	1707	178	1529	356	1885	0.188859	0.18846		0.9652	936.664	3.33605	933.328	6.6721	940	0.00709798	0.0352027
		0.1674	1709	178	1531	356	1887	0.188659	0.18846		0.9651	937.646	3.3538	934.292	6.70759	941	0.00712816	0.035496
		0.167	1710	178	1532	356	1888	0.188559	0.18846		0.9649	938.628	3.37164	935.257	6.74329	942	0.00715848	0.0357917
		0.1668	1711	178	1533	356	1889	0.18846	0.18846		0.9649	939.61	3.38959	936.221	6.77918	943	0.00718895	0.0357917
		0.1666	1711	179	1532	358	1890	0.189418	0.189418		0.9648	940.592	3.40763	937.185	6.81527	944	0.00721956	0.0360899
		0.1665	1711	180	1531	360	1891	0.190375	0.190074		0.9642	941.574	3.42578	938.148	6.85156	945	0.00725033	0.0362902
		0.1664	1713	180	1533	360	1893	0.190174	0.190074		0.9639	942.556	3.44402	939.112	6.88805	946	0.00728124	0.0364915
		0.1661	1714	180	1534	360	1894	0.190074	0.190074		0.9637	943.538	3.46237	940.075	6.92474	947	0.0073123	0.0367957
		0.1654	1715	182	1533	364	1897	0.191882	0.191781		0.9637	944.519	3.48082	941.038	6.96164	948	0.0073435	0.0367957
		0.1652	1716	182	1534	364	1898	0.191781	0.191781		0.9636	945.501	3.49937	942.001	6.99874	949	0.00737486	0.0372052
		0.165	1716	184	1532	368	1900	0.193684	0.193684		0.9636	946.482	3.51803	942.964	7.03605	950	0.00740637	0.0372052
		0.1648	1716	186	1530	372	1902	0.195584	0.195584		0.9625	947.463	3.53678	943.926	7.07357	951	0.00743803	0.0375153
		0.1647	1716	187	1529	374	1903	0.196532	0.196325		0.9622	948.444	3.55565	944.889	7.11129	952	0.00746984	0.0377236
		0.1646	1718	187	1531	374	1905	0.196325	0.196325		0.9619	949.425	3.57461	945.851	7.14922	953	0.00750181	0.037933
		0.1644	1718	188	1530	376	1906	0.197272	0.196993		0.9617	950.406	3.59368	946.813	7.18737	954	0.00753393	0.0382492
		0.164	1719	189	1530	378	1908	0.198113	0.196993		0.9617	951.387	3.61286	947.774	7.22572	955	0.0075662	0.0382492
		0.1639	1720	190	1530	380	1910	0.198953	0.196993		0.9613	952.368	3.63215	948.736	7.26429	956	0.00759863	0.0385682
		0.1635	1721	190	1531	380	1911	0.198849	0.196993		0.9605	953.348	3.65154	949.697	7.30307	957	0.00763122	0.0387823
		0.1634	1724	190	1534	380	1914	0.198537	0.196993		0.9604	954.329	3.67104	950.658	7.34207	958	0.00766396	0.0389976
		0.1633	1726	190	1536	380	1916	0.19833	0.196993		0.9596	955.309	3.69064	951.619	7.38129	959	0.00769686	0.0392141
		0.1631	1727	190	1537	380	1917	0.198226	0.196993		0.9591	956.29	3.71036	952.579	7.42072	960	0.00772991	0.0394318
		0.163	1728	190	1538	380	1918	0.198123	0.196993		0.959	957.27	3.73018	953.54	7.46037	961	0.00776313	0.0396508
		0.1628	1729	190	1539	380	1919	0.19802	0.196993		0.9588	958.25	3.75012	954.5	7.50024	962	0.00779651	0.0398709
		0.1627	1730	190	1540	380	1920	0.197917	0.196993		0.9576	959.23	3.77017	955.46	7.54033	963	0.00783004	0.0400923
		0.1626	1731	190	1541	380	1921	0.197814	0.196993		0.9572	960.21	3.79032	956.419	7.58065	964	0.00786374	0.0403149
		0.1624	1732	190	1542	380	1922	0.197711	0.196993		0.9563	961.189	3.81059	957.379	7.62119	965	0.0078976	0.0405388
		0.1623	1733	190	1543	380	1923	0.197608	0.196993		0.956	962.169	3.83097	958.338	7.66195	966	0.00793162	0.0407639
		0.162	1734	190	1544	380	1924	0.197505	0.196993		0.9559	963.149	3.85147	959.297	7.70294	967	0.00796581	0.0409903
		0.1619	1735	190	1545	380	1925	0.197403	0.196993		0.955	964.128	3.87208	960.256	7.74416	968	0.00800016	0.0412179
		0.1616	1737	190	1547	380	1927	0.197198	0.196993		0.9534	965.107	3.8928	961.214	7.7856	969	0.00803468	0.0414468
		0.1615	1738	190	1548	380	1928	0.197095	0.196993		0.9532	966.086	3.91364	962.173	7.82728	970	0.00806936	0.0416769
		0.1614	1739	190	1549	380	1929	0.196993	0.196993		0.9529	967.065	3.9346	963.131	7.86919	971	0.00810421	0.0422579
		0.1613	1739	191	1548	382	1930	0.197927	0.197825		0.9529	968.044	3.95567	964.089	7.91133	972	0.00813923	0.0422579
		0.1611	1740	191	1549	382	1931	0.197825	0.197825		0.9529	969.023	3.97685	965.046	7.95371	973	0.00817442	0.0422579
		0.161	1740	192	1548	384	1932	0.198758	0.198758		0.9529	970.002	3.99816	966.004	7.99632	974	0.00820977	0.0422579
		0.1607	1740	193	1547	386	1933	0.19969	0.199586		0.9528	970.98	4.01958	966.961	8.03916	975	0.0082453	0.042847
		0.1606	1741	193	1548	386	1934	0.199586	0.199586		0.9525	971.959	4.04112	967.918	8.08225	976	0.00828099	0.043085
		0.1604	1743	194	1549	388	1937	0.20031	0.200206		0.9524	972.937	4.06279	968.874	8.12557	977	0.00831686	0.0433242
		0.1601	1744	194	1550	388	1938	0.200206	0.200206		0.9515	973.915	4.08457	969.831	8.16914	978	0.0083529	0.0435648
		0.16	1744	195	1549	390	1939	0.201135	0.201135		0.9514	974.894	4.10647	970.787	8.21294	979	0.00838912	0.0439281
		0.1599	1744	196	1548	392	1940	0.202062	0.201854		0.9514	975.872	4.1285	971.743	8.25699	980	0.0084255	0.0439281
		0.1598	1746	196	1550	392	1942	0.201854	0.201854		0.951	976.849	4.15064	972.699	8.30129	981	0.00846207	0.0442945
		0.1597	1747	197	1550	394	1944	0.202675	0.202571		0.9509	977.827	4.17291	973.654	8.34583	982	0.00849881	0.0445404
		0.1596	1748	197	1551	394	1945	0.202571	0.202571		0.9507	978.805	4.19531	974.609	8.39062	983	0.00853572	0.0447877
		0.1595	1748	198	1550	396	1946	0.203494	0.203494		0.95	979.782	4.21783	975.564	8.43565	984	0.00857282	0.0450364
		0.1594	1748	200	1548	400	1948	0.205339	0.205233		0.9485	980.76	4.24047	976.519	8.48094	985	0.00861009	0.0452864
		0.1593	1749	200	1549	400	1949	0.205233	0.205233		0.9482	981.737	4.26324	977.474	8.52648	986	0.00864754	0.0455378
		0.1592	1749	202	1547	404	1951	0.207073	0.206967		0.9481	982.714	4.28613	978.428	8.57227	987	0.00868518	0.0457906
		0.1591	1750	202	1548	404	1952	0.206967	0.206967		0.9472	983.691	4.30916	979.382	8.61831	988	0.00872299	0.0461724
		0.159	1750	203	1547	406	1953	0.207885	0.207566		0.9472	984.668	4.33231	980.335	8.66461	989	0.00876099	0.0461724
		0.1588	1752	203	1549	406	1955	0.207673	0.207566		0.9471	985.644	4.35559	981.289	8.71117	990	0.00879916	0.0465574
		0.1585	1753	203	1550	406	1956	0.207566	0.207566		0.9467	986.621	4.37899	982.242	8.75799	991	0.00883753	0.0468158
		0.1584	1754	204	1550	408	1958	0.208376	0.208376		0.9465	987.597	4.40253	983.195	8.80506	992	0.00887607	0.0470756
		0.1582	1754	205	1549	410	1959	0.20929	0.20929		0.9453	988.574	4.4262	984.148	8.8524	993	0.0089148	0.0473368
		0.158	1755	206	1549	412	1961	0.210097	0.20935		0.9452	989.55	4.45	985.1	8.9	994	0.00895372	0.0475995
		0.1578	1756	206	1550	412	1962	0.20999	0.20935		0.945	990.526	4.47393	986.052	8.94786	995	0.00899283	0.0478636
		0.1576	1757	206	1551	412	1963	0.209883	0.20935		0.9439	991.502	4.498	987.004	8.99599	996	0.00903212	0.0481292
		0.1575	1758	206	1552	412	1964	0.209776	0.20935		0.9426	992.478	4.52219	987.956	9.04439	997	0.0090716	0.0483962
		0.1574	1760	206	1554	412	1966	0.209563	0.20935		0.9419	993.453	4.54653	988.907	9.09305	998	0.00911128	0.0486647
		0.1573	1762	206	1556	412	1968	0.20935	0.20935		0.9414	994.429	4.57099	989.858	9.14199	999	0.00915114	0.0489346
		0.1572	1763	208	1555	416	1971	0.21106	0.210953		0.9405	995.404	4.5956	990.809	9.19119	1000	0.00919119	0.0492061
		0.157	1764	208	1556	416	1972	0.210953	0.210953		0.9398	996.38	4.62034	991.759	9.24067	1001	0.00923144	0.049479
		0.1569	1764	209	1555	418	1973	0.21186	0.211646		0.9391	997.355	4.64521	992.71	9.29043	1002	0.00927188	0.0497534
		0.1568	1765	209	1556	418	1974	0.211753	0.211646		0.9389	998.33	4.67023	993.66	9.34046	1003	0.00931252	0.0500293
		0.1566	1766	209	1557	418	1975	0.211646	0.211646		0.9383	999.305	4.69538	994.609	9.39076	1004	0.00935335	0.0503067
		0.1565	1766	211	1555	422	1977	0.213455	0.213455		0.9371	1000.28	4.72067	995.559	9.44135	1005	0.00939438	0.0507256
		0.1563	1766	212	1554	424	1978	0.214358	0.214358		0.9371	1001.25	4.74611	996.508	9.49221	1006	0.0094356	0.0507256
		0.1562	1767	214	1553	428	1981	0.216052	0.216052		0.9354	1002.23	4.77168	997.457	9.54336	1007	0.00947702	0.051148
		0.1561	1767	215	1552	430	1982	0.216953	0.216953		0.9351	1003.2	4.7974	998.405	9.59479	1008	0.00951865	0.0515738
		0.156	1767	216	1551	432	1983	0.217852	0.217852		0.9351	1004.18	4.82326	999.353	9.64651	1009	0.00956047	0.0515738
		0.1559	1769	217	1552	434	1986	0.21853	0.21842		0.9345	1005.15	4.84926	1000.3	9.69851	1010	0.00960249	0.0520031
		0.1558	1770	217	1553	434	1987	0.21842	0.21842		0.9335	1006.12	4.8754	1001.25	9.75081	1011	0.00964471	0.0522912
		0.1557	1771	218	1553	436	1989	0.219206	0.218876		0.933	1007.1	4.90169	1002.2	9.80339	1012	0.00968714	0.0525809
		0.1556	1772	218	1554	436	1990	0.219095	0.218876		0.9328	1008.07	4.92813	1003.14	9.85626	1013	0.00972977	0.0528722
		0.1555	1773	218	1555	436	1991	0.218985	0.218876		0.9327	1009.05	4.95471	1004.09	9.90942	1014	0.00977261	0.053165
		0.1554	1774	218	1556	436	1992	0.218876	0.218876		0.9323	1010.02	4.98144	1005.04	9.96288	1015	0.00981565	0.0536072
		0.1553	1776	221	1555	442	1997	0.221332	0.221332		0.9323	1010.99	5.00832	1005.98	10.0166	1016	0.0098589	0.0536072
		0.1552	1777	222	1555	444	1999	0.222111	0.221778		0.9305	1011.96	5.03535	1006.93	10.0707	1017	0.00990235	0.0540531
		0.1551	1780	222	1558	444	2002	0.221778	0.221778		0.93	1012.94	5.06252	1007.87	10.125	1018	0.00994602	0.0543523
		0.155	1781	223	1558	446	2004	0.222555	0.222555		0.9294	1013.91	5.08985	1008.82	10.1797	1019	0.00998989	0.0546531
		0.1549	1783	224	1559	448	2007	0.223219	0.223219		0.9277	1014.88	5.11733	1009.77	10.2347	1020	0.010034	0.0549556
		0.1548	1783	225	1558	450	2008	0.224104	0.224104		0.9269	1015.86	5.14496	1010.71	10.2899	1021	0.0100783	0.0552597
		0.1547	1783	226	1557	452	2009	0.224988	0.224652		0.9262	1016.83	5.17274	1011.65	10.3455	1022	0.0101228	0.0555654
		0.1546	1784	226	1558	452	2010	0.224876	0.224652		0.9255	1017.8	5.20068	1012.6	10.4014	1023	0.0101675	0.0560271
		0.1539	1786	226	1560	452	2012	0.224652	0.224652		0.9255	1018.77	5.22877	1013.54	10.4575	1024	0.0102124	0.0560271
		0.1533	1786	227	1559	454	2013	0.225534	0.225534		0.9219	1019.74	5.25701	1014.49	10.514	1025	0.0102576	0.0564925
		0.153	1786	228	1558	456	2014	0.226415	0.226396		0.921	1020.71	5.28542	1015.43	10.5708	1026	0.010303	0.0569616
		0.1529	1786	229	1557	458	2015	0.227295	0.226396		0.921	1021.69	5.31397	1016.37	10.6279	1027	0.0103485	0.0569616
		0.1528	1787	229	1558	458	2016	0.227183	0.226396		0.9203	1022.66	5.34269	1017.31	10.6854	1028	0.0103943	0.0574345
		0.1521	1789	229	1560	458	2018	0.226957	0.226396		0.9178	1023.63	5.37157	1018.26	10.7431	1029	0.0104404	0.0577519
		0.152	1790	229	1561	458	2019	0.226845	0.226396		0.9166	1024.6	5.4006	1019.2	10.8012	1030	0.0104866	0.058071
		0.1518	1791	229	1562	458	2020	0.226733	0.226396		0.9164	1025.57	5.4298	1020.14	10.8596	1031	0.0105331	0.0585529
		0.1517	1792	229	1563	458	2021	0.22662	0.226396		0.9164	1026.54	5.45916	1021.08	10.9183	1032	0.0105798	0.0585529
		0.1514	1794	229	1565	458	2023	0.226396	0.226396		0.9163	1027.51	5.48868	1022.02	10.9774	1033	0.0106267	0.0590386
		0.1508	1794	230	1564	460	2024	0.227273	0.227273		0.9162	1028.48	5.51836	1022.96	11.0367	1034	0.0106738	0.0593645
		0.1505	1794	231	1563	462	2025	0.228148	0.227923		0.9154	1029.45	5.5482	1023.9	11.0964	1035	0.0107212	0.0596922
		0.1502	1795	231	1564	462	2026	0.228036	0.227923		0.9144	1030.42	5.57822	1024.84	11.1564	1036	0.0107688	0.0600217
		0.1499	1796	231	1565	462	2027	0.227923	0.227923		0.9135	1031.39	5.60839	1025.78	11.2168	1037	0.0108166	0.0603529
		0.1497	1796	232	1564	464	2028	0.228797	0.228684		0.9117	1032.36	5.63873	1026.72	11.2775	1038	0.0108646	0.0606858
		0.1496	1797	232	1565	464	2029	0.228684	0.228684		0.9076	1033.33	5.66924	1027.66	11.3385	1039	0.0109129	0.0610205
		0.1491	1797	233	1564	466	2030	0.229557	0.229557		0.9072	1034.3	5.69992	1028.6	11.3998	1040	0.0109614	0.061357
		0.149	1797	234	1563	468	2031	0.230428	0.230428		0.907	1035.27	5.73077	1029.54	11.4615	1041	0.0110101	0.0616953
		0.1488	1797	235	1562	470	2032	0.231299	0.231299		0.9066	1036.24	5.76179	1030.48	11.5236	1042	0.0110591	0.0620354
		0.1485	1797	236	1561	472	2033	0.232169	0.232169		0.9051	1037.21	5.79298	1031.41	11.586	1043	0.0111083	0.0623772
		0.1484	1797	237	1560	474	2034	0.233038	0.232924		0.9042	1038.18	5.82434	1032.35	11.6487	1044	0.0111577	0.0627209
		0.1482	1798	237	1561	474	2035	0.232924	0.232924		0.9037	1039.14	5.85587	1033.29	11.7117	1045	0.0112074	0.063588
		0.1481	1798	239	1559	478	2037	0.234659	0.234199		0.9037	1040.11	5.88758	1034.22	11.7752	1046	0.0112573	0.063588
		0.1478	1801	239	1562	478	2040	0.234314	0.234199		0.9037	1041.08	5.91946	1035.16	11.8389	1047	0.0113075	0.063588
		0.1477	1802	239	1563	478	2041	0.234199	0.234199		0.9037	1042.05	5.95152	1036.1	11.903	1048	0.0113579	0.063588
		0.1475	1802	240	1562	480	2042	0.235064	0.235064		0.9024	1043.02	5.98375	1037.03	11.9675	1049	0.0114085	0.0646437
		0.1474	1803	241	1562	482	2044	0.235812	0.235582		0.9024	1043.98	6.01616	1037.97	12.0323	1050	0.0114594	0.0646437
		0.1472	1804	241	1563	482	2045	0.235697	0.235582		0.9015	1044.95	6.04875	1038.9	12.0975	1051	0.0115105	0.0651779
		0.1471	1805	241	1564	482	2046	0.235582	0.235582		0.9007	1045.92	6.08152	1039.84	12.163	1052	0.0115618	0.0655363
		0.1469	1805	242	1563	484	2047	0.236444	0.236444		0.9006	1046.89	6.11447	1040.77	12.2289	1053	0.0116134	0.0658965
		0.1463	1805	243	1562	486	2048	0.237305	0.237189		0.9005	1047.85	6.1476	1041.7	12.2952	1054	0.0116653	0.0662587
		0.1458	1806	243	1563	486	2049	0.237189	0.237189		0.8995	1048.82	6.18091	1042.64	12.3618	1055	0.0117174	0.0666228
		0.1453	1807	244	1563	488	2051	0.237933	0.237585		0.8987	1049.79	6.2144	1043.57	12.4288	1056	0.0117697	0.0669888
		0.1451	1808	244	1564	488	2052	0.237817	0.237585		0.8968	1050.75	6.24808	1044.5	12.4962	1057	0.0118223	0.0673566
		0.1448	1809	244	1565	488	2053	0.237701	0.237585		0.8954	1051.72	6.28194	1045.44	12.5639	1058	0.0118751	0.0677264
		0.1447	1810	244	1566	488	2054	0.237585	0.237585		0.8939	1052.68	6.31599	1046.37	12.632	1059	0.0119282	0.0680981
		0.1445	1811	245	1566	490	2056	0.238327	0.238327		0.8936	1053.65	6.35023	1047.3	12.7005	1060	0.0119816	0.0684718
		0.1442	1811	246	1565	492	2057	0.239183	0.238719		0.8931	1054.62	6.38465	1048.23	12.7693	1061	0.0120352	0.0688474
		0.1441	1813	246	1567	492	2059	0.238951	0.238719		0.8904	1055.58	6.41926	1049.16	12.8385	1062	0.012089	0.0696044
		0.144	1815	246	1569	492	2061	0.238719	0.238719		0.8904	1056.55	6.45407	1050.09	12.9081	1063	0.0121431	0.0696044
		0.1435	1816	247	1569	494	2063	0.239457	0.239457		0.8904	1057.51	6.48906	1051.02	12.9781	1064	0.0121975	0.0696044
		0.1432	1817	248	1569	496	2065	0.240194	0.240194		0.8899	1058.48	6.52424	1051.95	13.0485	1065	0.0122521	0.0703694
		0.143	1817	249	1568	498	2066	0.241045	0.241045		0.8886	1059.44	6.55962	1052.88	13.1192	1066	0.012307	0.0707548
		0.1428	1817	250	1567	500	2067	0.241896	0.241663		0.8878	1060.4	6.59519	1053.81	13.1904	1067	0.0123621	0.0711422
		0.1427	1819	250	1569	500	2069	0.241663	0.241663		0.8872	1061.37	6.63096	1054.74	13.2619	1068	0.0124175	0.0715316
		0.1426	1819	251	1568	502	2070	0.242512	0.242512		0.8861	1062.33	6.66692	1055.67	13.3338	1069	0.0124732	0.071923
		0.1424	1819	252	1567	504	2071	0.243361	0.243361		0.8857	1063.3	6.70308	1056.59	13.4062	1070	0.0125291	0.0723165
		0.1422	1820	253	1567	506	2073	0.244091	0.243973		0.8855	1064.26	6.73943	1057.52	13.4789	1071	0.0125853	0.0729104
		0.1419	1821	253	1568	506	2074	0.243973	0.243973		0.8855	1065.22	6.77599	1058.45	13.552	1072	0.0126418	0.0729104
		0.1418	1821	254	1567	508	2075	0.244819	0.244231		0.8821	1066.19	6.81274	1059.37	13.6255	1073	0.0126985	0.0735089
		0.1417	1822	254	1568	508	2076	0.244701	0.244231		0.8803	1067.15	6.8497	1060.3	13.6994	1074	0.0127555	0.0739105
		0.1416	1823	254	1569	508	2077	0.244584	0.244231		0.8794	1068.11	6.88686	1061.23	13.7737	1075	0.0128128	0.0743141
		0.1414	1824	254	1570	508	2078	0.244466	0.244231		0.8785	1069.08	6.92422	1062.15	13.8484	1076	0.0128703	0.0747198
		0.1413	1826	254	1572	508	2080	0.244231	0.244231		0.8781	1070.04	6.96178	1063.08	13.9236	1077	0.0129281	0.0753323
		0.141	1826	255	1571	510	2081	0.245074	0.244722		0.8781	1071	6.99955	1064	13.9991	1078	0.0129862	0.0753323
		0.1407	1828	255	1573	510	2083	0.244839	0.244722		0.878	1071.96	7.03752	1064.92	14.075	1079	0.0130445	0.0759494
		0.1406	1829	255	1574	510	2084	0.244722	0.244722		0.8768	1072.92	7.07571	1065.85	14.1514	1080	0.0131032	0.0763634
		0.1405	1829	256	1573	512	2085	0.245564	0.245328		0.8763	1073.89	7.11409	1066.77	14.2282	1081	0.0131621	0.0767795
		0.1403	1831	256	1575	512	2087	0.245328	0.245328		0.8749	1074.85	7.15269	1067.69	14.3054	1082	0.0132212	0.0774077
		0.1401	1832	258	1574	516	2090	0.24689	0.246301		0.8749	1075.81	7.1915	1068.62	14.383	1083	0.0132807	0.0774077
		0.14	1837	258	1579	516	2095	0.246301	0.246301		0.8735	1076.77	7.23052	1069.54	14.461	1084	0.0133404	0.0782527
		0.1396	1838	259	1579	518	2097	0.24702	0.246549		0.8735	1077.73	7.26976	1070.46	14.5395	1085	0.0134005	0.0782527
		0.1395	1839	259	1580	518	2098	0.246902	0.246549		0.8716	1078.69	7.3092	1071.38	14.6184	1086	0.0134608	0.078892
		0.1394	1840	259	1581	518	2099	0.246784	0.246549		0.8715	1079.65	7.34886	1072.3	14.6977	1087	0.0135214	0.0793209
		0.1393	1842	259	1583	518	2101	0.246549	0.246549		0.8712	1080.61	7.38874	1073.22	14.7775	1088	0.0135822	0.0804027
		0.1392	1842	260	1582	520	2102	0.247383	0.247148		0.8712	1081.57	7.42883	1074.14	14.8577	1089	0.0136434	0.0804027
		0.1391	1844	260	1584	520	2104	0.247148	0.247148		0.8712	1082.53	7.46914	1075.06	14.9383	1090	0.0137048	0.0804027
		0.139	1846	262	1584	524	2108	0.248577	0.248577		0.8712	1083.49	7.50967	1075.98	15.0193	1091	0.0137666	0.0804027
		0.1389	1848	263	1585	526	2111	0.249171	0.249171		0.8673	1084.45	7.55042	1076.9	15.1008	1092	0.0138286	0.0814981
		0.1388	1849	264	1585	528	2113	0.249882	0.249763		0.8663	1085.41	7.59139	1077.82	15.1828	1093	0.0138909	0.0819401
		0.1387	1850	264	1586	528	2114	0.249763	0.249763		0.8646	1086.37	7.63258	1078.73	15.2652	1094	0.0139535	0.0839566
		0.1386	1850	265	1585	530	2115	0.250591	0.250591		0.8646	1087.33	7.674	1079.65	15.348	1095	0.0140164	0.0839566
		0.1385	1851	266	1585	532	2117	0.251299	0.251299		0.8646	1088.28	7.71564	1080.57	15.4313	1096	0.0140796	0.0839566
		0.1384	1851	267	1584	534	2118	0.252125	0.252125		0.8646	1089.24	7.7575	1081.48	15.515	1097	0.0141431	0.0839566
		0.1383	1852	268	1584	536	2120	0.25283	0.252592		0.8646	1090.2	7.79959	1082.4	15.5992	1098	0.0142069	0.0839566
		0.1382	1854	268	1586	536	2122	0.252592	0.252592		0.8646	1091.16	7.84191	1083.32	15.6838	1099	0.014271	0.0839566
		0.1381	1855	269	1586	538	2124	0.253296	0.253296		0.8646	1092.12	7.88446	1084.23	15.7689	1100	0.0143354	0.0839566
		0.138	1856	270	1586	540	2126	0.253998	0.253998		0.8646	1093.07	7.92724	1085.15	15.8545	1101	0.0144001	0.0839566
		0.1379	1857	271	1586	542	2128	0.254699	0.25446		0.8626	1094.03	7.97025	1086.06	15.9405	1102	0.0144651	0.0860185
		0.1378	1859	271	1588	542	2130	0.25446	0.25446		0.8609	1094.99	8.01349	1086.97	16.027	1103	0.0145304	0.086483
		0.1377	1860	273	1587	546	2133	0.255977	0.255977		0.8595	1095.94	8.05697	1087.89	16.1139	1104	0.014596	0.0874188
		0.1376	1860	276	1584	552	2136	0.258427	0.258427		0.8595	1096.9	8.10068	1088.8	16.2014	1105	0.0146619	0.0874188
		0.1375	1864	277	1587	554	2141	0.258758	0.258758		0.8595	1097.86	8.14462	1089.71	16.2892	1106	0.0147281	0.0874188
		0.1374	1866	278	1588	556	2144	0.259328	0.259328		0.857	1098.81	8.1888	1090.62	16.3776	1107	0.0147946	0.0886015
		0.1373	1870	280	1590	560	2150	0.260465	0.260465		0.857	1099.77	8.23322	1091.53	16.4664	1108	0.0148614	0.0886015
		0.1372	1870	281	1589	562	2151	0.261274	0.260789		0.8553	1100.72	8.27788	1092.44	16.5558	1109	0.0149286	0.0897987
		0.1371	1874	281	1593	562	2155	0.260789	0.260789		0.8553	1101.68	8.32278	1093.35	16.6456	1110	0.014996	0.0897987
		0.137	1877	282	1595	564	2159	0.261232	0.26087		0.8553	1102.63	8.36792	1094.26	16.7358	1111	0.0150638	0.0897987
		0.1369	1880	282	1598	564	2162	0.26087	0.26087		0.855	1103.59	8.41331	1095.17	16.8266	1112	0.0151318	0.090767
		0.1368	1880	289	1591	578	2169	0.266482	0.265992		0.8548	1104.54	8.45893	1096.08	16.9179	1113	0.0152002	0.0912547
		0.1367	1881	289	1592	578	2170	0.266359	0.265992		0.8547	1105.5	8.50481	1096.99	17.0096	1114	0.015269	0.0917448
		0.1362	1883	289	1594	578	2172	0.266114	0.265992		0.8538	1106.45	8.55092	1097.9	17.1018	1115	0.015338	0.0922372
		0.1358	1884	289	1595	578	2173	0.265992	0.265992		0.8533	1107.4	8.59729	1098.81	17.1946	1116	0.0154073	0.0929804
		0.1356	1884	290	1594	580	2174	0.266789	0.266667		0.8533	1108.36	8.6439	1099.71	17.2878	1117	0.015477	0.0929804
		0.1354	1885	290	1595	580	2175	0.266667	0.266667		0.8526	1109.31	8.69077	1100.62	17.3815	1118	0.015547	0.0944828
		0.1353	1885	291	1594	582	2176	0.267463	0.267092		0.8526	1110.26	8.73788	1101.52	17.4758	1119	0.0156173	0.0944828
		0.1352	1901	293	1608	586	2194	0.267092	0.267092		0.8526	1111.21	8.78525	1102.43	17.5705	1120	0.015688	0.0944828
		0.135	1902	294	1608	588	2196	0.26776	0.26776		0.8526	1112.17	8.83287	1103.33	17.6657	1121	0.0157589	0.0944828
		0.1348	1903	295	1608	590	2198	0.268426	0.268304		0.8509	1113.12	8.88075	1104.24	17.7615	1122	0.0158302	0.0957515
		0.134	1904	295	1609	590	2199	0.268304	0.268304		0.8493	1114.07	8.92888	1105.14	17.8578	1123	0.0159018	0.0962632
		0.1333	1904	296	1608	592	2200	0.269091	0.268969		0.8472	1115.02	8.97727	1106.05	17.9545	1124	0.0159738	0.0967774
		0.133	1905	296	1609	592	2201	0.268969	0.268969		0.847	1115.97	9.02592	1106.95	18.0518	1125	0.0160461	0.097294
		0.1329	1905	297	1608	594	2202	0.269755	0.269755		0.8453	1116.93	9.07482	1107.85	18.1496	1126	0.0161187	0.0978131
		0.1326	1905	298	1607	596	2203	0.27054	0.270295		0.8441	1117.88	9.12399	1108.75	18.248	1127	0.0161916	0.0988587
		0.1325	1906	298	1608	596	2204	0.270417	0.270295		0.8441	1118.83	9.17342	1109.65	18.3468	1128	0.0162649	0.0988587
		0.1322	1907	298	1609	596	2205	0.270295	0.270295		0.8441	1119.78	9.22311	1110.55	18.4462	1129	0.0163386	0.0988587
		0.1319	1907	299	1608	598	2206	0.271079	0.270956		0.8402	1120.73	9.27307	1111.45	18.5461	1130	0.0164125	0.10018
		0.1315	1908	299	1609	598	2207	0.270956	0.270956		0.8402	1121.68	9.32329	1112.35	18.6466	1131	0.0164868	0.10018
		0.1314	1909	300	1609	600	2209	0.271616	0.271125		0.8387	1122.63	9.37378	1113.25	18.7476	1132	0.0165615	0.10098
		0.131	1910	300	1610	600	2210	0.271493	0.271125		0.8385	1123.58	9.42454	1114.15	18.8491	1133	0.0166364	0.101516
		0.1309	1911	300	1611	600	2211	0.27137	0.271125		0.8375	1124.52	9.47557	1115.05	18.9511	1134	0.0167118	0.102055
		0.1306	1912	300	1612	600	2212	0.271248	0.271125		0.8354	1125.47	9.52687	1115.95	19.0537	1135	0.0167874	0.102597
		0.1304	1913	300	1613	600	2213	0.271125	0.271125		0.832	1126.42	9.57844	1116.84	19.1569	1136	0.0168634	0.103141
		0.1303	1913	301	1612	602	2214	0.271906	0.271906		0.8319	1127.37	9.63028	1117.74	19.2606	1137	0.0169398	0.103688
		0.1299	1914	302	1612	604	2216	0.272563	0.272563		0.8306	1128.32	9.6824	1118.64	19.3648	1138	0.0170165	0.105065
		0.1296	1914	304	1610	608	2218	0.274121	0.273997		0.8306	1129.27	9.73479	1119.53	19.4696	1139	0.0170936	0.105065
		0.1291	1915	304	1611	608	2219	0.273997	0.273997		0.8306	1130.21	9.78747	1120.43	19.5749	1140	0.017171	0.105065
		0.1289	1916	305	1611	610	2221	0.274651	0.274651		0.8306	1131.16	9.84042	1121.32	19.6808	1141	0.0172488	0.105065
		0.1288	1917	306	1611	612	2223	0.275304	0.275246		0.8298	1132.11	9.89364	1122.21	19.7873	1142	0.0173269	0.106459
		0.1286	1919	307	1612	614	2226	0.275831	0.275246		0.8258	1133.05	9.94716	1123.11	19.8943	1143	0.0174053	0.107021
		0.1284	1919	308	1611	616	2227	0.276605	0.275246		0.8255	1134	10.0009	1124	20.0019	1144	0.0174842	0.107586
		0.1278	1921	308	1613	616	2229	0.276357	0.275246		0.8251	1134.94	10.055	1124.89	20.11	1145	0.0175634	0.108153
		0.1277	1922	308	1614	616	2230	0.276233	0.275246		0.8223	1135.89	10.1094	1125.78	20.2188	1146	0.0176429	0.108723
		0.1275	1923	308	1615	616	2231	0.276109	0.275246		0.8207	1136.84	10.164	1126.67	20.3281	1147	0.0177228	0.109295
		0.1271	1924	308	1616	616	2232	0.275986	0.275246		0.8206	1137.78	10.219	1127.56	20.4379	1148	0.0178031	0.110159
		0.127	1926	308	1618	616	2234	0.275739	0.275246		0.8206	1138.73	10.2742	1128.45	20.5484	1149	0.0178837	0.110159
		0.1269	1928	308	1620	616	2236	0.275492	0.275246		0.8202	1139.67	10.3297	1129.34	20.6594	1150	0.0179647	0.111028
		0.1267	1930	308	1622	616	2238	0.275246	0.275246		0.8192	1140.61	10.3855	1130.23	20.771	1151	0.0180461	0.112197
		0.1266	1930	309	1621	618	2239	0.276016	0.276016		0.8192	1141.56	10.4416	1131.12	20.8832	1152	0.0181278	0.112197
		0.1265	1969	335	1634	670	2304	0.290799	0.290672		0.8192	1142.5	10.498	1132	20.996	1153	0.0182099	0.112197
		0.1263	1970	335	1635	670	2305	0.290672	0.290672		0.8171	1143.45	10.5547	1132.89	21.1094	1154	0.0182924	0.113376
		0.1262	1970	336	1634	672	2306	0.291414	0.291414		0.8148	1144.39	10.6117	1133.78	21.2234	1155	0.0183752	0.113969
		0.1259	1970	337	1633	674	2307	0.292154	0.291649		0.8138	1145.33	10.669	1134.66	21.3379	1156	0.0184584	0.114566
		0.1257	1973	337	1636	674	2310	0.291775	0.291649		0.8122	1146.27	10.7265	1135.55	21.4531	1157	0.018542	0.115465
		0.1248	1974	337	1637	674	2311	0.291649	0.291649		0.8122	1147.22	10.7844	1136.43	21.5688	1158	0.0186259	0.115465
		0.1245	1974	338	1636	676	2312	0.292388	0.292388		0.8117	1148.16	10.8426	1137.31	21.6852	1159	0.0187103	0.116674
		0.1242	1974	339	1635	678	2313	0.293126	0.293126		0.8117	1149.1	10.9011	1138.2	21.8022	1160	0.018795	0.116674
		0.1241	1974	340	1634	680	2314	0.293863	0.293863		0.8099	1150.04	10.9599	1139.08	21.9198	1161	0.0188801	0.117587
		0.124	1974	341	1633	682	2315	0.2946	0.2946		0.8093	1150.98	11.019	1139.96	22.038	1162	0.0189656	0.118199
		0.1236	1974	342	1632	684	2316	0.295337	0.295337		0.8057	1151.92	11.0784	1140.84	22.1568	1163	0.0190514	0.118815
		0.1235	1974	343	1631	686	2317	0.296073	0.296073		0.8048	1152.86	11.1381	1141.72	22.2762	1164	0.0191377	0.119742
		0.1234	1974	344	1630	688	2318	0.296808	0.296808		0.8048	1153.8	11.1981	1142.6	22.3963	1165	0.0192243	0.119742
		0.1232	1974	345	1629	690	2319	0.297542	0.297542		0.8039	1154.74	11.2585	1143.48	22.517	1166	0.0193113	0.121302
		0.123	1974	346	1628	692	2320	0.298276	0.29811		0.8039	1155.68	11.3191	1144.36	22.6383	1167	0.0193987	0.121302
		0.1228	1975	346	1629	692	2321	0.298147	0.29811		0.8039	1156.62	11.3801	1145.24	22.7602	1168	0.0194865	0.121302
		0.1227	1975	347	1628	694	2322	0.29888	0.29811		0.8037	1157.56	11.4414	1146.12	22.8828	1169	0.0195746	0.122562
		0.1225	1976	347	1629	694	2323	0.298752	0.29811		0.8023	1158.5	11.503	1146.99	23.006	1170	0.0196632	0.123197
		0.1224	1977	347	1630	694	2324	0.298623	0.29811		0.7987	1159.44	11.5649	1147.87	23.1298	1171	0.0197522	0.123834
		0.1223	1979	347	1632	694	2326	0.298366	0.29811		0.798	1160.37	11.6271	1148.75	23.2543	1172	0.0198415	0.124473
		0.1221	1981	347	1634	694	2328	0.29811	0.29811		0.7971	1161.31	11.6897	1149.62	23.3794	1173	0.0199313	0.125116
		0.122	1981	348	1633	696	2329	0.298841	0.298456		0.796	1162.25	11.7526	1150.49	23.5051	1174	0.0200214	0.125761
		0.1217	1982	348	1634	696	2330	0.298712	0.298456		0.7959	1163.18	11.8158	1151.37	23.6315	1175	0.020112	0.126409
		0.1216	1984	348	1636	696	2332	0.298456	0.298456		0.7932	1164.12	11.8793	1152.24	23.7586	1176	0.0202029	0.12706
		0.1215	1984	349	1635	698	2333	0.299186	0.298674		0.7921	1165.06	11.9432	1153.11	23.8863	1177	0.0202942	0.127714
		0.1213	1985	349	1636	698	2334	0.299057	0.298674		0.7908	1165.99	12.0073	1153.99	24.0147	1178	0.020386	0.128371
		0.1212	1986	349	1637	698	2335	0.298929	0.298674		0.7877	1166.93	12.0719	1154.86	24.1437	1179	0.0204781	0.129692
		0.1211	1988	349	1639	698	2337	0.298674	0.298674		0.7877	1167.86	12.1367	1155.73	24.2734	1180	0.0205707	0.129692
		0.1209	1988	350	1638	700	2338	0.299401	0.299401		0.7877	1168.8	12.2019	1156.6	24.4038	1181	0.0206637	0.129692
		0.1206	1988	351	1637	702	2339	0.300128	0.299744		0.7865	1169.73	12.2674	1157.47	24.5348	1182	0.020757	0.131025
		0.1204	1989	351	1638	702	2340	0.3	0.299744		0.7861	1170.67	12.3332	1158.33	24.6665	1183	0.0208508	0.131695
		0.1203	1991	351	1640	702	2342	0.299744	0.299744		0.7852	1171.6	12.3994	1159.2	24.7989	1184	0.020945	0.132706
		0.1202	1991	352	1639	704	2343	0.300469	0.300469		0.7852	1172.53	12.466	1160.07	24.9319	1185	0.0210396	0.132706
		0.1201	1991	353	1638	706	2344	0.301195	0.301195		0.7829	1173.47	12.5328	1160.93	25.0656	1186	0.0211346	0.133724
		0.12	1991	354	1637	708	2345	0.301919	0.301919		0.7827	1174.4	12.6	1161.8	25.2	1187	0.02123	0.134406
		0.1199	1991	355	1636	710	2346	0.302643	0.302514		0.7823	1175.33	12.6676	1162.66	25.3351	1188	0.0213259	0.13509
		0.1196	1992	355	1637	710	2347	0.302514	0.302514		0.7805	1176.26	12.7355	1163.53	25.4709	1189	0.0214221	0.135778
		0.1193	1992	356	1636	712	2348	0.303237	0.30285		0.7803	1177.2	12.8037	1164.39	25.6074	1190	0.0215188	0.136468
		0.1192	1993	356	1637	712	2349	0.303108	0.30285		0.7801	1178.13	12.8723	1165.26	25.7445	1191	0.0216159	0.137162
		0.1189	1994	356	1638	712	2350	0.302979	0.30285		0.78	1179.06	12.9412	1166.12	25.8824	1192	0.0217134	0.137858
		0.1188	1995	356	1639	712	2351	0.30285	0.30285		0.7799	1179.99	13.0105	1166.98	26.0209	1193	0.0218114	0.138557
		0.1187	1995	358	1637	716	2353	0.304292	0.304292		0.7773	1180.92	13.0801	1167.84	26.1602	1194	0.0219097	0.139259
		0.1184	1995	360	1635	720	2355	0.305732	0.305732		0.7759	1181.85	13.1501	1168.7	26.3002	1195	0.0220085	0.139963
		0.1182	1997	361	1636	722	2358	0.306192	0.306192		0.7738	1182.78	13.2204	1169.56	26.4408	1196	0.0221077	0.141738
		0.1181	1997	362	1635	724	2359	0.30691	0.30691		0.7738	1183.71	13.2911	1170.42	26.5822	1197	0.0222074	0.141738
		0.1178	1997	363	1634	726	2360	0.307627	0.307497		0.7738	1184.64	13.3622	1171.28	26.7243	1198	0.0223074	0.141738
		0.1175	1998	363	1635	726	2361	0.307497	0.307497		0.7738	1185.57	13.4336	1172.13	26.8671	1199	0.0224079	0.141738
		0.1174	1999	364	1635	728	2363	0.308083	0.308083		0.7705	1186.49	13.5053	1172.99	27.0107	1200	0.0225089	0.14353
		0.1171	1999	365	1634	730	2364	0.308799	0.308538		0.7695	1187.42	13.5775	1173.85	27.1549	1201	0.0226103	0.144252
		0.117	2000	365	1635	730	2365	0.308668	0.308538		0.7692	1188.35	13.6499	1174.7	27.2999	1202	0.0227121	0.144977
		0.1169	2001	365	1636	730	2366	0.308538	0.308538		0.7688	1189.28	13.7228	1175.55	27.4456	1203	0.0228143	0.145705
		0.1168	2002	366	1636	732	2368	0.309122	0.309122		0.7686	1190.2	13.796	1176.41	27.592	1204	0.022917	0.146436
		0.1167	2005	368	1637	736	2373	0.310156	0.310156		0.7673	1191.13	13.8696	1177.26	27.7392	1205	0.0230201	0.14717
		0.1165	2005	369	1636	738	2374	0.310868	0.310737		0.7672	1192.06	13.9436	1178.11	27.8871	1206	0.0231236	0.147906
		0.1164	2006	369	1637	738	2375	0.310737	0.310737		0.7639	1192.98	14.0179	1178.96	28.0358	1207	0.0232276	0.148646
		0.1163	2006	370	1636	740	2376	0.311448	0.311448		0.7625	1193.91	14.0926	1179.81	28.1851	1208	0.0233321	0.149388
		0.1162	2007	371	1636	742	2378	0.312027	0.312027		0.7619	1194.83	14.1676	1180.66	28.3353	1209	0.023437	0.150133
		0.1161	2007	372	1635	744	2379	0.312736	0.312605		0.759	1195.76	14.2431	1181.51	28.4862	1210	0.0235423	0.151257
		0.116	2008	372	1636	744	2380	0.312605	0.312605		0.759	1196.68	14.3189	1182.36	28.6378	1211	0.0236481	0.151257
		0.1158	2008	374	1634	748	2382	0.314022	0.313627		0.7582	1197.6	14.3951	1183.21	28.7902	1212	0.0237543	0.152387
		0.1157	2010	374	1636	748	2384	0.313758	0.313627		0.7572	1198.53	14.4717	1184.06	28.9433	1213	0.0238609	0.153144
		0.1156	2011	374	1637	748	2385	0.313627	0.313627		0.7545	1199.45	14.5486	1184.9	29.0972	1214	0.0239681	0.153904
		0.1155	2012	375	1637	750	2387	0.314202	0.314202		0.754	1200.37	14.6259	1185.75	29.2519	1215	0.0240756	0.154666
		0.1154	2013	376	1637	752	2389	0.314776	0.314776		0.7487	1201.3	14.7037	1186.59	29.4073	1216	0.0241837	0.155432
		0.1153	2014	377	1637	754	2391	0.315349	0.315349		0.7479	1202.22	14.7818	1187.44	29.5635	1217	0.0242921	0.156586
		0.1152	2016	378	1638	756	2394	0.315789	0.315789		0.7479	1203.14	14.8602	1188.28	29.7205	1218	0.0244011	0.156586
		0.115	2019	379	1640	758	2398	0.316097	0.316097		0.7453	1204.06	14.9391	1189.12	29.8782	1219	0.0245105	0.157747
		0.1149	2020	380	1640	760	2400	0.316667	0.316667		0.7411	1204.98	15.0184	1189.96	30.0368	1220	0.0246203	0.158525
		0.1148	2020	381	1639	762	2401	0.317368	0.317236		0.74	1205.9	15.098	1190.8	30.1961	1221	0.0247306	0.159305
		0.1147	2021	381	1640	762	2402	0.317236	0.317236		0.7385	1206.82	15.1781	1191.64	30.3562	1222	0.0248414	0.160089
		0.1145	2024	382	1642	764	2406	0.317539	0.317539		0.7374	1207.74	15.2585	1192.48	30.517	1223	0.0249526	0.160875
		0.1144	2024	383	1641	766	2407	0.318238	0.317974		0.7342	1208.66	15.3394	1193.32	30.6787	1224	0.0250643	0.161664
		0.1143	2026	383	1643	766	2409	0.317974	0.317974		0.734	1209.58	15.4206	1194.16	30.8412	1225	0.0251765	0.162456
		0.1142	2028	386	1642	772	2414	0.319801	0.319801		0.7335	1210.5	15.5022	1195	31.0044	1226	0.0252891	0.163251
		0.1141	2029	387	1642	774	2416	0.320364	0.320364		0.7328	1211.42	15.5842	1195.83	31.1685	1227	0.0254022	0.16405
		0.1139	2032	388	1644	776	2420	0.320661	0.320661		0.7301	1212.33	15.6667	1196.67	31.3333	1228	0.0255157	0.164851
		0.1138	2034	390	1644	780	2424	0.321782	0.321384		0.7296	1213.25	15.7495	1197.5	31.499	1229	0.0256298	0.165655
		0.1137	2037	390	1647	780	2427	0.321384	0.321384		0.7295	1214.17	15.8327	1198.33	31.6654	1230	0.0257442	0.166461
		0.1136	2037	392	1645	784	2429	0.322767	0.322767		0.7253	1215.08	15.9163	1199.17	31.8327	1231	0.0258592	0.167271
		0.1135	2039	395	1644	790	2434	0.324569	0.324569		0.7202	1216	16.0004	1200	32.0008	1232	0.0259747	0.168084
		0.1134	2041	396	1645	792	2437	0.32499	0.32499		0.7196	1216.92	16.0848	1200.83	32.1697	1233	0.0260906	0.1689
		0.1133	2041	399	1642	798	2440	0.327049	0.327049		0.7168	1217.83	16.1697	1201.66	32.3394	1234	0.026207	0.169719
		0.1131	2043	400	1643	800	2443	0.327466	0.327332		0.7145	1218.75	16.255	1202.49	32.5099	1235	0.0263238	0.17054
		0.1127	2044	400	1644	800	2444	0.327332	0.327332		0.7139	1219.66	16.3407	1203.32	32.6813	1236	0.0264412	0.171778
		0.112	2045	401	1644	802	2446	0.327882	0.327748		0.7139	1220.57	16.4267	1204.15	32.8535	1237	0.026559	0.171778
		0.1113	2046	401	1645	802	2447	0.327748	0.327748		0.7103	1221.49	16.5133	1204.97	33.0265	1238	0.0266773	0.173023
		0.111	2046	402	1644	804	2448	0.328431	0.328029		0.7094	1222.4	16.6002	1205.8	33.2004	1239	0.0267961	0.173856
		0.1105	2047	402	1645	804	2449	0.328297	0.328029		0.7086	1223.31	16.6875	1206.62	33.3751	1240	0.0269154	0.176374
		0.1102	2048	402	1646	804	2450	0.328163	0.328029		0.7086	1224.22	16.7753	1207.45	33.5506	1241	0.0270351	0.176374
		0.1097	2049	402	1647	804	2451	0.328029	0.328029		0.7086	1225.14	16.8635	1208.27	33.727	1242	0.0271554	0.176374
		0.1095	2049	403	1646	806	2452	0.328711	0.32837		0.7086	1226.05	16.9521	1209.1	33.9042	1243	0.0272761	0.176374
		0.1092	2049	404	1645	808	2453	0.329393	0.32837		0.7086	1226.96	17.0411	1209.92	34.0823	1244	0.0273973	0.176374
		0.109	2050	404	1646	808	2454	0.329258	0.32837		0.7061	1227.87	17.1306	1210.74	34.2612	1245	0.027519	0.178918
		0.1081	2052	404	1648	808	2456	0.32899	0.32837		0.7058	1228.78	17.2205	1211.56	34.441	1246	0.0276412	0.180629
		0.1079	2052	405	1647	810	2457	0.32967	0.32837		0.7058	1229.69	17.3108	1212.38	34.6216	1247	0.0277639	0.180629
		0.1076	2054	405	1649	810	2459	0.329402	0.32837		0.7058	1230.6	17.4015	1213.2	34.8031	1248	0.0278871	0.180629
		0.1075	2055	405	1650	810	2460	0.329268	0.32837		0.7029	1231.51	17.4927	1214.01	34.9854	1249	0.0280107	0.182351
		0.1073	2056	405	1651	810	2461	0.329134	0.32837		0.6985	1232.42	17.5843	1214.83	35.1686	1250	0.0281349	0.183651
		0.1072	2056	406	1650	812	2462	0.329813	0.32837		0.6985	1233.32	17.6764	1215.65	35.3527	1251	0.0282596	0.183651
		0.1068	2057	406	1651	812	2463	0.329679	0.32837		0.6961	1234.23	17.7688	1216.46	35.5377	1252	0.0283847	0.184957
		0.1066	2058	406	1652	812	2464	0.329545	0.32837		0.6953	1235.14	17.8618	1217.28	35.7235	1253	0.0285104	0.185831
		0.1065	2059	406	1653	812	2465	0.329412	0.32837		0.6923	1236.04	17.9551	1218.09	35.9102	1254	0.0286365	0.186709
		0.1057	2060	406	1654	812	2466	0.329278	0.32837		0.6854	1236.95	18.0489	1218.9	36.0978	1255	0.0287632	0.187589
		0.1054	2060	407	1653	814	2467	0.329955	0.32837		0.6838	1237.86	18.1431	1219.71	36.2863	1256	0.0288904	0.188472
		0.1053	2061	407	1654	814	2468	0.329822	0.32837		0.6836	1238.76	18.2378	1220.52	36.4756	1257	0.029018	0.189358
		0.1051	2062	407	1655	814	2469	0.329688	0.32837		0.6818	1239.67	18.3329	1221.33	36.6659	1258	0.0291462	0.190247
		0.1047	2063	407	1656	814	2470	0.329555	0.32837		0.6815	1240.57	18.4285	1222.14	36.857	1259	0.0292748	0.191138
		0.1046	2064	407	1657	814	2471	0.329421	0.32837		0.6799	1241.48	18.5245	1222.95	37.0491	1260	0.029404	0.192033
		0.1044	2065	407	1658	814	2472	0.329288	0.32837		0.6786	1242.38	18.621	1223.76	37.242	1261	0.0295337	0.192931
		0.1042	2067	407	1660	814	2474	0.329022	0.32837		0.6775	1243.28	18.7179	1224.56	37.4358	1262	0.0296639	0.193831
		0.1038	2068	407	1661	814	2475	0.328889	0.32837		0.6766	1244.18	18.8153	1225.37	37.6306	1263	0.0297946	0.194734
		0.1036	2069	407	1662	814	2476	0.328756	0.32837		0.6747	1245.09	18.9131	1226.17	37.8262	1264	0.0299258	0.195641
		0.1035	2070	407	1663	814	2477	0.328623	0.32837		0.6738	1245.99	19.0114	1226.98	38.0227	1265	0.0300575	0.197005
		0.1031	2070	408	1662	816	2478	0.329298	0.32837		0.6738	1246.89	19.1101	1227.78	38.2202	1266	0.0301897	0.197005
		0.1028	2071	408	1663	816	2479	0.329165	0.32837		0.6736	1247.79	19.2093	1228.58	38.4186	1267	0.0303225	0.198376
		0.1026	2075	408	1667	816	2483	0.328635	0.32837		0.6724	1248.69	19.3089	1229.38	38.6179	1268	0.0304557	0.199294
		0.1023	2077	408	1669	816	2485	0.32837	0.32837		0.6685	1249.59	19.409	1230.18	38.8181	1269	0.0305895	0.200214
		0.1019	2077	409	1668	818	2486	0.329043	0.329043		0.6682	1250.49	19.5096	1230.98	39.0192	1270	0.0307238	0.201138
		0.1018	2077	410	1667	820	2487	0.329715	0.329582		0.6681	1251.39	19.6106	1231.78	39.2213	1271	0.0308586	0.202064
		0.1015	2078	410	1668	820	2488	0.329582	0.329582		0.6678	1252.29	19.7121	1232.58	39.4243	1272	0.0309939	0.202993
		0.1011	2078	411	1667	822	2489	0.330253	0.33012		0.6644	1253.19	19.8141	1233.37	39.6282	1273	0.0311298	0.203925
		0.1006	2079	411	1668	822	2490	0.33012	0.33012		0.663	1254.08	19.9165	1234.17	39.8331	1274	0.0312661	0.204859
		0.1003	2079	412	1667	824	2491	0.330791	0.330658		0.6608	1254.98	20.0194	1234.96	40.0389	1275	0.031403	0.205797
		0.09981	2080	412	1668	824	2492	0.330658	0.330658		0.658	1255.88	20.1228	1235.75	40.2456	1276	0.0315404	0.206737
		0.09953	2080	413	1667	826	2493	0.331328	0.331062		0.6559	1256.77	20.2266	1236.55	40.4533	1277	0.0316784	0.20768
		0.09948	2082	413	1669	826	2495	0.331062	0.331062		0.655	1257.67	20.331	1237.34	40.6619	1278	0.0318168	0.2091
		0.09927	2082	414	1668	828	2496	0.331731	0.331598		0.655	1258.56	20.4357	1238.13	40.8715	1279	0.0319558	0.2091
		0.09926	2083	414	1669	828	2497	0.331598	0.331598		0.654	1259.46	20.541	1238.92	41.082	1280	0.0320953	0.210526
		0.09899	2083	415	1668	830	2498	0.332266	0.331735		0.6531	1260.35	20.6467	1239.71	41.2935	1281	0.0322354	0.21148
		0.09872	2084	415	1669	830	2499	0.332133	0.331735		0.6521	1261.25	20.753	1240.49	41.5059	1282	0.0323759	0.212437
		0.09857	2085	415	1670	830	2500	0.332	0.331735		0.6492	1262.14	20.8597	1241.28	41.7193	1283	0.032517	0.213397
		0.09819	2086	415	1671	830	2501	0.331867	0.331735		0.6486	1263.03	20.9668	1242.07	41.9337	1284	0.0326586	0.214359
		0.09818	2087	415	1672	830	2502	0.331735	0.331735		0.6459	1263.93	21.0745	1242.85	42.149	1285	0.0328008	0.215324
		0.09808	2087	416	1671	832	2503	0.332401	0.332268		0.6421	1264.82	21.1827	1243.63	42.3653	1286	0.0329435	0.216292
		0.09807	2088	416	1672	832	2504	0.332268	0.332268		0.6411	1265.71	21.2913	1244.42	42.5826	1287	0.0330867	0.217263
		0.09805	2088	417	1671	834	2505	0.332934	0.332934		0.6404	1266.6	21.4004	1245.2	42.8008	1288	0.0332304	0.218236
		0.09804	2089	418	1671	836	2507	0.333466	0.333466		0.6402	1267.49	21.51	1245.98	43.02	1289	0.0333747	0.219213
		0.09802	2089	419	1670	838	2508	0.334131	0.333998		0.6389	1268.38	21.6201	1246.76	43.2402	1290	0.0335195	0.220191
		0.098	2090	419	1671	838	2509	0.333998	0.333998		0.6356	1269.27	21.7307	1247.54	43.4614	1291	0.0336649	0.221173
		0.09799	2090	420	1670	840	2510	0.334661	0.334392		0.634	1270.16	21.8418	1248.32	43.6835	1292	0.0338108	0.222157
		0.09798	2091	420	1671	840	2511	0.334528	0.334392		0.629	1271.05	21.9533	1249.09	43.9067	1293	0.0339572	0.223144
		0.09797	2093	421	1672	842	2514	0.334924	0.334392		0.6278	1271.93	22.0654	1249.87	44.1308	1294	0.0341042	0.224134
		0.09796	2097	421	1676	842	2518	0.334392	0.334392		0.626	1272.82	22.178	1250.64	44.3559	1295	0.0342517	0.225126
		0.09795	2099	422	1677	844	2521	0.334788	0.334788		0.6256	1273.71	22.291	1251.42	44.5821	1296	0.0343997	0.226121
		0.09794	2099	423	1676	846	2522	0.335448	0.335448		0.6246	1274.6	22.4046	1252.19	44.8092	1297	0.0345483	0.227118
		0.09793	2100	425	1675	850	2525	0.336634	0.336634		0.6217	1275.48	22.5186	1252.96	45.0373	1298	0.0346975	0.228118
		0.09792	2100	426	1674	852	2526	0.337292	0.337025		0.6158	1276.37	22.6332	1253.73	45.2664	1299	0.0348471	0.229121
		0.09791	2102	426	1676	852	2528	0.337025	0.337025		0.6136	1277.25	22.7483	1254.5	45.4965	1300	0.0349973	0.230127
		0.0979	2105	428	1677	856	2533	0.337939	0.337939		0.6106	1278.14	22.8638	1255.27	45.7277	1301	0.0351481	0.231135
		0.09789	2109	432	1677	864	2541	0.340024	0.340024		0.6092	1279.02	22.9799	1256.04	45.9598	1302	0.0352994	0.232145
		0.09788	2114	435	1679	870	2549	0.34131	0.34131		0.6037	1279.9	23.0965	1256.81	46.193	1303	0.0354513	0.233158
		0.09787	2116	438	1678	876	2554	0.342991	0.342991		0.6026	1280.79	23.2136	1257.57	46.4272	1304	0.0356037	0.234174
		0.09786	2119	444	1675	888	2563	0.346469	0.345497		0.6018	1281.67	23.3312	1258.34	46.6624	1305	0.0357566	0.235193
		0.09785	2131	445	1686	890	2576	0.345497	0.345497		0.6015	1282.55	23.4493	1259.1	46.8986	1306	0.0359101	0.236213
		0.09784	2137	452	1685	904	2589	0.34917	0.34917		0.5977	1283.43	23.5679	1259.86	47.1358	1307	0.0360641	0.237237
		0.09783	2151	460	1691	920	2611	0.352355	0.352355		0.5959	1284.31	23.687	1260.63	47.3741	1308	0.0362187	0.238263
		0.09782	2165	474	1691	948	2639	0.359227	0.359227		0.5951	1285.19	23.8067	1261.39	47.6134	1309	0.0363738	0.239291
		0.09781	2175	481	1694	962	2656	0.362199	0.361518		0.5938	1286.07	23.9268	1262.15	47.8537	1310	0.0365295	0.240322
		0.09769	2176	481	1695	962	2657	0.362062	0.361518		0.5901	1286.95	24.0475	1262.9	48.095	1311	0.0366858	0.241356
		0.09768	2177	481	1696	962	2658	0.361926	0.361518		0.5899	1287.83	24.1687	1263.66	48.3374	1312	0.0368426	0.242392
		0.09742	2178	481	1697	962	2659	0.36179	0.361518		0.588	1288.71	24.2904	1264.42	48.5809	1313	0.0369999	0.24343
		0.0973	2180	481	1699	962	2661	0.361518	0.361518		0.5854	1289.59	24.4127	1265.17	48.8253	1314	0.0371578	0.244471
		0.0972	2180	482	1698	964	2662	0.362134	0.361998		0.5739	1290.46	24.5354	1265.93	49.0708	1315	0.0373162	0.245514
		0.09718	2181	482	1699	964	2663	0.361998	0.361998		0.5734	1291.34	24.6587	1266.68	49.3174	1316	0.0374752	0.24656
		0.09717	2181	483	1698	966	2664	0.362613	0.362613		0.5707	1292.22	24.7825	1267.43	49.565	1317	0.0376348	0.247608
		0.09715	2181	484	1697	968	2665	0.363227	0.363227		0.5693	1293.09	24.9068	1268.19	49.8137	1318	0.0377949	0.248659
		0.09693	2181	485	1696	970	2666	0.363841	0.363433		0.5651	1293.97	25.0317	1268.94	50.0634	1319	0.0379556	0.249712
		0.0969	2181	486	1695	972	2667	0.364454	0.363433		0.5644	1294.84	25.1571	1269.69	50.3141	1320	0.0381168	0.251296
		0.09674	2182	486	1696	972	2668	0.364318	0.363433		0.5644	1295.72	25.283	1270.43	50.566	1321	0.0382786	0.251296
		0.09653	2182	487	1695	974	2669	0.364931	0.363433		0.5626	1296.59	25.4094	1271.18	50.8189	1322	0.0384409	0.252885
		0.0965	2183	487	1696	974	2670	0.364794	0.363433		0.5625	1297.46	25.5364	1271.93	51.0728	1323	0.0386038	0.253947
		0.09644	2184	487	1697	974	2671	0.364657	0.363433		0.5582	1298.34	25.6639	1272.67	51.3278	1324	0.0387672	0.255012
		0.09642	2185	487	1698	974	2672	0.364521	0.363433		0.5574	1299.21	25.7919	1273.42	51.5839	1325	0.0389312	0.256079
		0.09612	2186	487	1699	974	2673	0.364385	0.363433		0.5559	1300.08	25.9205	1274.16	51.841	1326	0.0390958	0.257148
		0.09611	2188	487	1701	974	2675	0.364112	0.363433		0.5511	1300.95	26.0496	1274.9	52.0993	1327	0.0392609	0.25822
		0.096	2190	487	1703	974	2677	0.36384	0.363433		0.5499	1301.82	26.1793	1275.64	52.3586	1328	0.0394266	0.259294
		0.09538	2191	487	1704	974	2678	0.363704	0.363433		0.5492	1302.69	26.3095	1276.38	52.6189	1329	0.0395929	0.26037
		0.09537	2193	487	1706	974	2680	0.363433	0.363433		0.5491	1303.56	26.4402	1277.12	52.8804	1330	0.0397597	0.26307
		0.09508	2193	488	1705	976	2681	0.364043	0.364043		0.5491	1304.43	26.5715	1277.86	53.1429	1331	0.0399271	0.26307
		0.09503	2193	489	1704	978	2682	0.364653	0.364653		0.5491	1305.3	26.7033	1278.59	53.4065	1332	0.040095	0.26307
		0.09486	2193	490	1703	980	2683	0.365263	0.364991		0.5491	1306.16	26.8356	1279.33	53.6712	1333	0.0402635	0.26307
		0.09468	2194	490	1704	980	2684	0.365127	0.364991		0.5462	1307.03	26.9685	1280.06	53.937	1334	0.0404325	0.266329
		0.09453	2195	490	1705	980	2685	0.364991	0.364991		0.5462	1307.9	27.1019	1280.8	54.2039	1335	0.0406022	0.266329
		0.09451	2195	491	1704	982	2686	0.365599	0.365463		0.5449	1308.76	27.2359	1281.53	54.4718	1336	0.0407723	0.267965
		0.09437	2196	491	1705	982	2687	0.365463	0.365463		0.5442	1309.63	27.3705	1282.26	54.7409	1337	0.0409431	0.269059
		0.09436	2196	492	1704	984	2688	0.366071	0.365935		0.5414	1310.49	27.5055	1282.99	55.0111	1338	0.0411144	0.270155
		0.09434	2197	492	1705	984	2689	0.365935	0.365935		0.5378	1311.36	27.6412	1283.72	55.2823	1339	0.0412863	0.271253
		0.09406	2197	493	1704	986	2690	0.366543	0.366407		0.5359	1312.22	27.7773	1284.45	55.5547	1340	0.0414587	0.272353
		0.09401	2198	493	1705	986	2691	0.366407	0.366407		0.5329	1313.09	27.9141	1285.17	55.8281	1341	0.0416317	0.273455
		0.09384	2199	494	1705	988	2693	0.366877	0.366741		0.5327	1313.95	28.0513	1285.9	56.1027	1342	0.0418053	0.274559
		0.09375	2200	494	1706	988	2694	0.366741	0.366741		0.5292	1314.81	28.1892	1286.62	56.3783	1343	0.0419794	0.275665
		0.09369	2200	496	1704	992	2696	0.367953	0.367287		0.5268	1315.67	28.3276	1287.34	56.6551	1344	0.0421541	0.276774
		0.09352	2201	496	1705	992	2697	0.367816	0.367287		0.5205	1316.53	28.4665	1288.07	56.933	1345	0.0423294	0.277884
		0.09338	2201	497	1704	994	2698	0.368421	0.367287		0.5176	1317.39	28.606	1288.79	57.212	1346	0.0425052	0.278996
		0.09331	2201	498	1703	996	2699	0.369026	0.367287		0.5172	1318.25	28.7461	1289.51	57.4921	1347	0.0426816	0.28011
		0.09311	2202	498	1704	996	2700	0.368889	0.367287		0.5161	1319.11	28.8867	1290.23	57.7733	1348	0.0428586	0.281226
		0.09307	2203	498	1705	996	2701	0.368752	0.367287		0.5156	1319.97	29.0278	1290.94	58.0557	1349	0.0430361	0.282344
		0.09301	2203	499	1704	998	2702	0.369356	0.367287		0.5155	1320.83	29.1696	1291.66	58.3391	1350	0.0432142	0.283464
		0.09296	2204	499	1705	998	2703	0.369219	0.367287		0.5152	1321.69	29.3119	1292.38	58.6237	1351	0.0433928	0.284586
		0.0929	2204	500	1704	1000	2704	0.369822	0.367287		0.5146	1322.55	29.4547	1293.09	58.9094	1352	0.0435721	0.28571
		0.09277	2204	501	1703	1002	2705	0.370425	0.367287		0.5141	1323.4	29.5981	1293.8	59.1963	1353	0.0437519	0.286835
		0.09248	2205	501	1704	1002	2706	0.370288	0.367287		0.5125	1324.26	29.7421	1294.52	59.4842	1354	0.0439322	0.287963
		0.09242	2206	501	1705	1002	2707	0.370151	0.367287		0.5106	1325.11	29.8867	1295.23	59.7733	1355	0.0441132	0.289092
		0.09241	2209	501	1708	1002	2710	0.369742	0.367287		0.5096	1325.97	30.0318	1295.94	60.0636	1356	0.0442947	0.290223
		0.09231	2209	502	1707	1004	2711	0.370343	0.367287		0.5088	1326.82	30.1775	1296.65	60.3549	1357	0.0444767	0.291356
		0.09211	2210	502	1708	1004	2712	0.370206	0.367287		0.5048	1327.68	30.3237	1297.35	60.6474	1358	0.0446594	0.292491
		0.09206	2211	502	1709	1004	2713	0.37007	0.367287		0.5035	1328.53	30.4705	1298.06	60.941	1359	0.0448425	0.293627
		0.09173	2212	502	1710	1004	2714	0.369934	0.367287		0.5031	1329.38	30.6179	1298.76	61.2358	1360	0.0450263	0.294765
		0.0917	2215	502	1713	1004	2717	0.369525	0.367287		0.5008	1330.23	30.7658	1299.47	61.5317	1361	0.0452107	0.295905
		0.09137	2216	502	1714	1004	2718	0.369389	0.367287		0.4982	1331.09	30.9144	1300.17	61.8287	1362	0.0453956	0.297047
		0.09132	2218	502	1716	1004	2720	0.369118	0.367287		0.4973	1331.94	31.0635	1300.87	62.1269	1363	0.045581	0.29819
		0.09107	2219	502	1717	1004	2721	0.368982	0.367287		0.4939	1332.79	31.2131	1301.57	62.4263	1364	0.0457671	0.299335
		0.0908	2220	502	1718	1004	2722	0.368846	0.367287		0.49	1333.64	31.3634	1302.27	62.7268	1365	0.0459537	0.300482
		0.09076	2222	502	1720	1004	2724	0.368576	0.367287		0.4879	1334.49	31.5142	1302.97	63.0284	1366	0.0461408	0.30163
		0.09062	2223	502	1721	1004	2725	0.36844	0.367287		0.4867	1335.33	31.6656	1303.67	63.3312	1367	0.0463286	0.30278
		0.0906	2224	502	1722	1004	2726	0.368305	0.367287		0.4865	1336.18	31.8175	1304.36	63.6351	1368	0.0465169	0.303931
		0.09045	2225	502	1723	1004	2727	0.36817	0.367287		0.4864	1337.03	31.9701	1305.06	63.9402	1369	0.0467058	0.305084
		0.09042	2226	502	1724	1004	2728	0.368035	0.367287		0.4841	1337.88	32.1232	1305.75	64.2464	1370	0.0468952	0.306238
		0.09034	2227	502	1725	1004	2729	0.3679	0.367287		0.4809	1338.72	32.2769	1306.45	64.5538	1371	0.0470852	0.307394
		0.09026	2228	502	1726	1004	2730	0.367766	0.367287		0.4806	1339.57	32.4312	1307.14	64.8624	1372	0.0472758	0.309131
		0.09024	2229	502	1727	1004	2731	0.367631	0.367287		0.4806	1340.41	32.586	1307.83	65.1721	1373	0.0474669	0.309131
		0.09012	2230	502	1728	1004	2732	0.367496	0.367287		0.479	1341.26	32.7415	1308.52	65.4829	1374	0.0476586	0.310871
		0.08988	2230	503	1727	1006	2733	0.368094	0.367287		0.4788	1342.1	32.8975	1309.21	65.795	1375	0.0478509	0.312033
		0.08966	2232	503	1729	1006	2735	0.367824	0.367287		0.4786	1342.95	33.0541	1309.89	66.1082	1376	0.0480437	0.313196
		0.08957	2233	503	1730	1006	2736	0.36769	0.367287		0.4772	1343.79	33.2113	1310.58	66.4225	1377	0.0482371	0.314361
		0.08943	2234	503	1731	1006	2737	0.367556	0.367287		0.4763	1344.63	33.369	1311.26	66.7381	1378	0.0484311	0.315527
		0.08942	2236	503	1733	1006	2739	0.367287	0.367287		0.4752	1345.47	33.5274	1311.95	67.0548	1379	0.0486256	0.316694
		0.08923	2236	504	1732	1008	2740	0.367883	0.367883		0.4749	1346.31	33.6863	1312.63	67.3726	1380	0.0488207	0.317863
		0.08921	2236	505	1731	1010	2741	0.368479	0.368479		0.4728	1347.15	33.8458	1313.31	67.6916	1381	0.0490164	0.319033
		0.08875	2236	506	1730	1012	2742	0.369074	0.368805		0.4717	1347.99	34.0059	1313.99	68.0119	1382	0.0492126	0.320204
		0.08868	2237	506	1731	1012	2743	0.368939	0.368805		0.4702	1348.83	34.1666	1314.67	68.3332	1383	0.0494094	0.321377
		0.08863	2238	506	1732	1012	2744	0.368805	0.368805		0.4661	1349.67	34.3279	1315.34	68.6558	1384	0.0496068	0.32255
		0.08859	2238	507	1731	1014	2745	0.369399	0.369264		0.4658	1350.51	34.4898	1316.02	68.9795	1385	0.0498047	0.324313
		0.08857	2239	507	1732	1014	2746	0.369264	0.369264		0.4658	1351.35	34.6522	1316.7	69.3044	1386	0.0500032	0.324313
		0.0885	2239	508	1731	1016	2747	0.369858	0.369455		0.4645	1352.18	34.8152	1317.37	69.6305	1387	0.0502022	0.327257
		0.08843	2240	508	1732	1016	2748	0.369723	0.369455		0.4645	1353.02	34.9789	1318.04	69.9577	1388	0.0504018	0.327257
		0.08837	2242	508	1734	1016	2750	0.369455	0.369455		0.4645	1353.86	35.1431	1318.71	70.2862	1389	0.050602	0.327257
		0.08828	2242	509	1733	1018	2751	0.370047	0.369913		0.4633	1354.69	35.3079	1319.38	70.6158	1390	0.0508027	0.329618
		0.0881	2243	509	1734	1018	2752	0.369913	0.369913		0.4624	1355.53	35.4733	1320.05	70.9466	1391	0.051004	0.3308
		0.08807	2243	510	1733	1020	2753	0.370505	0.370505		0.4623	1356.36	35.6393	1320.72	71.2786	1392	0.0512059	0.331983
		0.08805	2243	511	1732	1022	2754	0.371097	0.371097		0.4583	1357.19	35.8059	1321.39	71.6117	1393	0.0514083	0.333167
		0.08793	2243	512	1731	1024	2755	0.371688	0.371688		0.4566	1358.03	35.973	1322.05	71.9461	1394	0.0516113	0.334352
		0.0879	2243	514	1729	1028	2757	0.372869	0.372869		0.4565	1358.86	36.1408	1322.72	72.2816	1395	0.0518148	0.335538
		0.08748	2243	515	1728	1030	2758	0.373459	0.373459		0.4554	1359.69	36.3092	1323.38	72.6184	1396	0.0520189	0.336725
		0.08747	2243	516	1727	1032	2759	0.374049	0.373642		0.4541	1360.52	36.4781	1324.04	72.9563	1397	0.0522235	0.337913
		0.08738	2245	516	1729	1032	2761	0.373778	0.373642		0.4536	1361.35	36.6477	1324.7	73.2954	1398	0.0524287	0.339102
		0.08737	2246	516	1730	1032	2762	0.373642	0.373642		0.4526	1362.18	36.8178	1325.36	73.6357	1399	0.0526345	0.340292
		0.08732	2246	517	1729	1034	2763	0.374231	0.374231		0.4522	1363.01	36.9886	1326.02	73.9771	1400	0.0528408	0.342078
		0.08731	2246	518	1728	1036	2764	0.374819	0.374548		0.4522	1363.84	37.1599	1326.68	74.3198	1401	0.0530477	0.342078
		0.08725	2248	518	1730	1036	2766	0.374548	0.374548		0.4501	1364.67	37.3318	1327.34	74.6637	1402	0.0532551	0.343866
		0.08724	2248	520	1728	1040	2768	0.375723	0.375723		0.4497	1365.5	37.5044	1327.99	75.0087	1403	0.0534631	0.345059
		0.0872	2249	521	1728	1042	2770	0.376173	0.376173		0.4473	1366.32	37.6775	1328.64	75.355	1404	0.0536717	0.346253
		0.08719	2293	559	1734	1118	2852	0.392006	0.391501		0.446	1367.15	37.8512	1329.3	75.7024	1405	0.0538807	0.347448
		0.08707	2293	560	1733	1120	2853	0.392569	0.391501		0.4441	1367.97	38.0255	1329.95	76.0511	1406	0.0540904	0.348644
		0.0869	2295	560	1735	1120	2855	0.392294	0.391501		0.4439	1368.8	38.2005	1330.6	76.4009	1407	0.0543006	0.34984
		0.08689	2298	561	1737	1122	2859	0.392445	0.391501		0.4437	1369.62	38.376	1331.25	76.752	1408	0.0545113	0.351037
		0.08688	2302	562	1740	1124	2864	0.392458	0.391501		0.443	1370.45	38.5521	1331.9	77.1042	1409	0.0547226	0.352234
		0.08686	2304	562	1742	1124	2866	0.392184	0.391501		0.4373	1371.27	38.7288	1332.54	77.4576	1410	0.0549345	0.353433
		0.08674	2305	562	1743	1124	2867	0.392047	0.391501		0.4372	1372.09	38.9061	1333.19	77.8123	1411	0.0551469	0.354632
		0.08669	2307	562	1745	1124	2869	0.391774	0.391501		0.4368	1372.92	39.084	1333.83	78.1681	1412	0.0553598	0.355831
		0.08665	2308	562	1746	1124	2870	0.391638	0.391501		0.4367	1373.74	39.2626	1334.47	78.5251	1413	0.0555733	0.357031
		0.08656	2309	562	1747	1124	2871	0.391501	0.391501		0.4363	1374.56	39.4417	1335.12	78.8834	1414	0.0557874	0.358232
		0.08623	2309	564	1745	1128	2873	0.392621	0.392484		0.434	1375.38	39.6214	1335.76	79.2428	1415	0.056002	0.359433
		0.08609	2310	564	1746	1128	2874	0.392484	0.392484		0.4304	1376.2	39.8017	1336.4	79.6034	1416	0.0562171	0.360635
		0.08608	2310	565	1745	1130	2875	0.393043	0.392907		0.4298	1377.02	39.9826	1337.03	79.9653	1417	0.0564328	0.361837
		0.08592	2311	565	1746	1130	2876	0.392907	0.392907		0.4294	1377.84	40.1642	1337.67	80.3283	1418	0.056649	0.363039
		0.08573	2311	566	1745	1132	2877	0.393465	0.393329		0.4281	1378.65	40.3463	1338.31	80.6925	1419	0.0568658	0.364242
		0.08571	2312	566	1746	1132	2878	0.393329	0.393329		0.4276	1379.47	40.529	1338.94	81.058	1420	0.0570831	0.365446
		0.08569	2312	567	1745	1134	2879	0.393887	0.393488		0.4231	1380.29	40.7123	1339.58	81.4246	1421	0.0573009	0.36665
		0.08556	2313	567	1746	1134	2880	0.39375	0.393488		0.4227	1381.1	40.8962	1340.21	81.7925	1422	0.0575193	0.367854
		0.08537	2314	568	1746	1136	2882	0.394171	0.393488		0.4224	1381.92	41.0808	1340.84	82.1616	1423	0.0577383	0.369059
		0.08534	2315	568	1747	1136	2883	0.394034	0.393488		0.4221	1382.73	41.2659	1341.47	82.5318	1424	0.0579577	0.370263
		0.08505	2316	568	1748	1136	2884	0.393897	0.393488		0.422	1383.55	41.4516	1342.1	82.9033	1425	0.0581777	0.371469
		0.0848	2319	568	1751	1136	2887	0.393488	0.393488		0.4207	1384.36	41.638	1342.72	83.276	1426	0.0583983	0.372674
		0.08479	2320	569	1751	1138	2889	0.393908	0.393635		0.4191	1385.18	41.8249	1343.35	83.6498	1427	0.0586194	0.37388
		0.08466	2321	569	1752	1138	2890	0.393772	0.393635		0.4189	1385.99	42.0125	1343.98	84.0249	1428	0.058841	0.375086
		0.08455	2322	569	1753	1138	2891	0.393635	0.393635		0.4187	1386.8	42.2006	1344.6	84.4012	1429	0.0590631	0.376292
		0.08453	2322	570	1752	1140	2892	0.394191	0.394191		0.4169	1387.61	42.3894	1345.22	84.7787	1430	0.0592858	0.377498
		0.08442	2322	571	1751	1142	2893	0.394746	0.394211		0.4167	1388.42	42.5787	1345.84	85.1574	1431	0.059509	0.378704
		0.08434	2323	571	1752	1142	2894	0.39461	0.394211		0.4149	1389.23	42.7687	1346.46	85.5373	1432	0.0597328	0.379911
		0.08431	2323	572	1751	1144	2895	0.395164	0.394211		0.4125	1390.04	42.9592	1347.08	85.9185	1433	0.059957	0.381118
		0.08428	2324	572	1752	1144	2896	0.395028	0.394211		0.4112	1390.85	43.1504	1347.7	86.3008	1434	0.0601819	0.382928
		0.08419	2326	572	1754	1144	2898	0.394755	0.394211		0.4112	1391.66	43.3422	1348.32	86.6843	1435	0.0604072	0.382928
		0.08404	2327	572	1755	1144	2899	0.394619	0.394211		0.4103	1392.47	43.5345	1348.93	87.069	1436	0.060633	0.385341
		0.08396	2328	572	1756	1144	2900	0.394483	0.394211		0.4103	1393.27	43.7275	1349.55	87.455	1437	0.0608594	0.385341
		0.08384	2329	572	1757	1144	2901	0.394347	0.394211		0.4094	1394.08	43.9211	1350.16	87.8421	1438	0.0610863	0.387152
		0.08381	2330	572	1758	1144	2902	0.394211	0.394211		0.4067	1394.88	44.1152	1350.77	88.2305	1439	0.0613138	0.388358
		0.08369	2330	573	1757	1146	2903	0.394764	0.394492		0.4056	1395.69	44.31	1351.38	88.6201	1440	0.0615417	0.389565
		0.08367	2331	573	1758	1146	2904	0.394628	0.394492		0.4053	1396.49	44.5054	1351.99	89.0108	1441	0.0617702	0.390772
		0.0835	2332	573	1759	1146	2905	0.394492	0.394492		0.4048	1397.3	44.7014	1352.6	89.4028	1442	0.0619992	0.391978
		0.08339	2333	574	1759	1148	2907	0.394909	0.394909		0.4046	1398.1	44.898	1353.2	89.796	1443	0.0622287	0.393787
		0.08336	2333	575	1758	1150	2908	0.395461	0.395325		0.4046	1398.9	45.0952	1353.81	90.1904	1444	0.0624587	0.393787
		0.08327	2334	575	1759	1150	2909	0.395325	0.395325		0.4042	1399.71	45.293	1354.41	90.586	1445	0.0626893	0.395596
		0.08326	2335	576	1759	1152	2911	0.39574	0.395333		0.4041	1400.51	45.4914	1355.02	90.9828	1446	0.0629203	0.396802
		0.08325	2336	576	1760	1152	2912	0.395604	0.395333		0.4017	1401.31	45.6904	1355.62	91.3808	1447	0.0631519	0.398008
		0.0832	2337	576	1761	1152	2913	0.395469	0.395333		0.4011	1402.11	45.89	1356.22	91.78	1448	0.063384	0.399213
		0.08316	2338	576	1762	1152	2914	0.395333	0.395333		0.401	1402.91	46.0902	1356.82	92.1804	1449	0.0636166	0.400418
		0.08305	2338	577	1761	1154	2915	0.395883	0.395883		0.399	1403.71	46.291	1357.42	92.582	1450	0.0638497	0.401622
		0.08295	2338	578	1760	1156	2916	0.396433	0.396162		0.395	1404.51	46.4924	1358.02	92.9849	1451	0.0640833	0.404031
		0.08275	2340	578	1762	1156	2918	0.396162	0.396162		0.395	1405.31	46.6945	1358.61	93.3889	1452	0.0643174	0.404031
		0.08271	2340	579	1761	1158	2919	0.396711	0.39644		0.395	1406.1	46.8971	1359.21	93.7941	1453	0.0645521	0.404031
		0.08268	2341	579	1762	1158	2920	0.396575	0.39644		0.3929	1406.9	47.1003	1359.8	94.2006	1454	0.0647872	0.406437
		0.08189	2342	579	1763	1158	2921	0.39644	0.39644		0.3928	1407.7	47.3041	1360.39	94.6082	1455	0.0650228	0.408241
		0.08183	2342	580	1762	1160	2922	0.396988	0.396988		0.3928	1408.49	47.5085	1360.98	95.0171	1456	0.065259	0.408241
		0.08177	2342	581	1761	1162	2923	0.397537	0.397265		0.3924	1409.29	47.7136	1361.57	95.4271	1457	0.0654956	0.410044
		0.08175	2343	581	1762	1162	2924	0.397401	0.397265		0.3911	1410.08	47.9192	1362.16	95.8383	1458	0.0657327	0.411245
		0.08174	2344	581	1763	1162	2925	0.397265	0.397265		0.3908	1410.87	48.1254	1362.75	96.2508	1459	0.0659704	0.412446
		0.08169	2344	582	1762	1164	2926	0.397813	0.397677		0.39	1411.67	48.3322	1363.34	96.6644	1460	0.0662085	0.413646
		0.08167	2345	582	1763	1164	2927	0.397677	0.397677		0.3879	1412.46	48.5396	1363.92	97.0793	1461	0.0664472	0.415446
		0.08145	2345	583	1762	1166	2928	0.398224	0.398224		0.3879	1413.25	48.7477	1364.5	97.4953	1462	0.0666863	0.415446
		0.08138	2345	584	1761	1168	2929	0.398771	0.398499		0.3866	1414.04	48.9563	1365.09	97.9126	1463	0.0669259	0.417243
		0.08137	2346	584	1762	1168	2930	0.398635	0.398499		0.3858	1414.83	49.1655	1365.67	98.331	1464	0.067166	0.418441
		0.08118	2347	584	1763	1168	2931	0.398499	0.398499		0.3843	1415.62	49.3753	1366.25	98.7507	1465	0.0674066	0.419638
		0.08108	2347	585	1762	1170	2932	0.399045	0.399045		0.3837	1416.41	49.5857	1366.83	99.1715	1466	0.0676477	0.420835
		0.08101	2347	586	1761	1172	2933	0.399591	0.399455		0.381	1417.2	49.7968	1367.41	99.5935	1467	0.0678892	0.422628
		0.08095	2348	586	1762	1172	2934	0.399455	0.399455		0.381	1417.99	50.0084	1367.98	100.017	1468	0.0681313	0.422628
		0.08087	2348	587	1761	1174	2935	0.4	0.399864		0.3809	1418.78	50.2206	1368.56	100.441	1469	0.0683738	0.424419
		0.0806	2349	587	1762	1174	2936	0.399864	0.399864		0.3801	1419.57	50.4334	1369.13	100.867	1470	0.0686169	0.425613
		0.08054	2349	588	1761	1176	2937	0.400409	0.400409		0.3798	1420.35	50.6468	1369.71	101.294	1471	0.0688604	0.426805
		0.08047	2349	589	1760	1178	2938	0.400953	0.400953		0.3793	1421.14	50.8608	1370.28	101.722	1472	0.0691043	0.427997
		0.08035	2349	590	1759	1180	2939	0.401497	0.401497		0.3791	1421.92	51.0754	1370.85	102.151	1473	0.0693488	0.429188
		0.08024	2349	591	1758	1182	2940	0.402041	0.402041		0.3772	1422.71	51.2906	1371.42	102.581	1474	0.0695937	0.430378
		0.08021	2349	592	1757	1184	2941	0.402584	0.402443		0.3771	1423.49	51.5064	1371.99	103.013	1475	0.0698391	0.431567
		0.0801	2349	593	1756	1186	2942	0.403127	0.402443		0.3743	1424.28	51.7227	1372.55	103.445	1476	0.070085	0.432755
		0.08003	2350	593	1757	1186	2943	0.40299	0.402443		0.373	1425.06	51.9397	1373.12	103.879	1477	0.0703314	0.433943
		0.07976	2351	593	1758	1186	2944	0.402853	0.402443		0.3709	1425.84	52.1573	1373.69	104.315	1478	0.0705782	0.435129
		0.07974	2352	593	1759	1186	2945	0.402716	0.402443		0.37	1426.62	52.3754	1374.25	104.751	1479	0.0708255	0.436314
		0.07973	2353	593	1760	1186	2946	0.40258	0.402443		0.3679	1427.41	52.5942	1374.81	105.188	1480	0.0710732	0.437498
		0.07953	2354	593	1761	1186	2947	0.402443	0.402443		0.3671	1428.19	52.8135	1375.37	105.627	1481	0.0713214	0.438682
		0.07925	2354	594	1760	1188	2948	0.402985	0.402985		0.3668	1428.97	53.0334	1375.93	106.067	1482	0.0715701	0.439864
		0.07889	2354	595	1759	1190	2949	0.403527	0.403117		0.3651	1429.75	53.254	1376.49	106.508	1483	0.0718192	0.441045
		0.0787	2356	595	1761	1190	2951	0.403253	0.403117		0.3643	1430.52	53.4751	1377.05	106.95	1484	0.0720688	0.442225
		0.07852	2357	595	1762	1190	2952	0.403117	0.403117		0.3635	1431.3	53.6968	1377.61	107.394	1485	0.0723189	0.443404
		0.0784	2357	596	1761	1192	2953	0.403657	0.403621		0.3628	1432.08	53.9191	1378.16	107.838	1486	0.0725694	0.444582
		0.07783	2357	597	1760	1194	2954	0.404198	0.403621		0.3624	1432.86	54.142	1378.72	108.284	1487	0.0728204	0.446346
		0.07752	2359	597	1762	1194	2956	0.403924	0.403621		0.3624	1433.63	54.3654	1379.27	108.731	1488	0.0730718	0.446346
		0.07747	2359	598	1761	1196	2957	0.404464	0.403621		0.3623	1434.41	54.5895	1379.82	109.179	1489	0.0733237	0.448694
		0.07737	2360	598	1762	1196	2958	0.404327	0.403621		0.3623	1435.19	54.8141	1380.37	109.628	1490	0.073576	0.448694
		0.07736	2360	599	1761	1198	2959	0.404867	0.403621		0.3614	1435.96	55.0393	1380.92	110.079	1491	0.0738288	0.450452
		0.07724	2361	599	1762	1198	2960	0.40473	0.403621		0.3589	1436.73	55.2652	1381.47	110.53	1492	0.074082	0.451623
		0.07675	2362	599	1763	1198	2961	0.404593	0.403621		0.3584	1437.51	55.4915	1382.02	110.983	1493	0.0743356	0.452792
		0.07651	2362	600	1762	1200	2962	0.405132	0.403621		0.3572	1438.28	55.7185	1382.56	111.437	1494	0.0745897	0.45396
		0.07626	2363	600	1763	1200	2963	0.404995	0.403621		0.3568	1439.05	55.9461	1383.11	111.892	1495	0.0748443	0.455126
		0.07622	2364	600	1764	1200	2964	0.404858	0.403621		0.3565	1439.83	56.1742	1383.65	112.348	1496	0.0750992	0.456291
		0.0756	2365	600	1765	1200	2965	0.404722	0.403621		0.3559	1440.6	56.403	1384.19	112.806	1497	0.0753547	0.458036
		0.07543	2365	601	1764	1202	2966	0.40526	0.403621		0.3559	1441.37	56.6323	1384.74	113.265	1498	0.0756105	0.458036
		0.07512	2366	601	1765	1202	2967	0.405123	0.403621		0.3555	1442.14	56.8622	1385.28	113.724	1499	0.0758668	0.460358
		0.07503	2367	601	1766	1202	2968	0.404987	0.403621		0.3555	1442.91	57.0926	1385.81	114.185	1500	0.0761235	0.460358
		0.07498	2368	601	1767	1202	2969	0.40485	0.403621		0.354	1443.68	57.3237	1386.35	114.647	1501	0.0763807	0.462096
		0.0747	2369	601	1768	1202	2970	0.404714	0.403621		0.3532	1444.44	57.5553	1386.89	115.111	1502	0.0766382	0.46383
		0.07463	2370	601	1769	1202	2971	0.404578	0.403621		0.3532	1445.21	57.7875	1387.42	115.575	1503	0.0768962	0.46383
		0.07435	2371	601	1770	1202	2972	0.404441	0.403621		0.3525	1445.98	58.0203	1387.96	116.041	1504	0.0771546	0.465561
		0.07424	2372	601	1771	1202	2973	0.404305	0.403621		0.3522	1446.75	58.2536	1388.49	116.507	1505	0.0774135	0.466713
		0.07402	2373	601	1772	1202	2974	0.404169	0.403621		0.3518	1447.51	58.4876	1389.02	116.975	1506	0.0776727	0.467863
		0.07388	2376	601	1775	1202	2977	0.403762	0.403621		0.3515	1448.28	58.7221	1389.56	117.444	1507	0.0779324	0.469012
		0.07385	2376	602	1774	1204	2978	0.404298	0.403621		0.3512	1449.04	58.9572	1390.09	117.914	1508	0.0781925	0.470159
		0.07372	2377	602	1775	1204	2979	0.404162	0.403621		0.3503	1449.81	59.1928	1390.61	118.386	1509	0.078453	0.471305
		0.07313	2378	602	1776	1204	2980	0.404027	0.403621		0.3502	1450.57	59.429	1391.14	118.858	1510	0.078714	0.47302
		0.07309	2379	602	1777	1204	2981	0.403891	0.403621		0.3502	1451.33	59.6658	1391.67	119.332	1511	0.0789753	0.47302
		0.07283	2380	602	1778	1204	2982	0.403756	0.403621		0.3477	1452.1	59.9032	1392.19	119.806	1512	0.079237	0.474732
		0.07275	2381	602	1779	1204	2983	0.403621	0.403621		0.3473	1452.86	60.1411	1392.72	120.282	1513	0.0794992	0.475871
		0.07271	2381	603	1778	1206	2984	0.404155	0.40402		0.3471	1453.62	60.3796	1393.24	120.759	1514	0.0797617	0.477008
		0.0724	2382	603	1779	1206	2985	0.40402	0.40402		0.3469	1454.38	60.6187	1393.76	121.237	1515	0.0800247	0.478144
		0.07234	2382	604	1778	1208	2986	0.404555	0.404555		0.3466	1455.14	60.8584	1394.28	121.717	1516	0.0802881	0.479277
		0.07233	2382	605	1777	1210	2987	0.405089	0.404953		0.3451	1455.9	61.0986	1394.8	122.197	1517	0.0805518	0.480409
		0.07206	2383	605	1778	1210	2988	0.404953	0.404953		0.3449	1456.66	61.3393	1395.32	122.679	1518	0.080816	0.482104
		0.07136	2383	606	1777	1212	2989	0.405487	0.405072		0.3449	1457.42	61.5807	1395.84	123.161	1519	0.0810805	0.482104
		0.07131	2384	606	1778	1212	2990	0.405351	0.405072		0.3433	1458.18	61.8226	1396.35	123.645	1520	0.0813455	0.483795
		0.07126	2385	606	1779	1212	2991	0.405216	0.405072		0.3423	1458.93	62.065	1396.87	124.13	1521	0.0816108	0.484919
		0.07123	2385	607	1778	1214	2992	0.405749	0.405072		0.3418	1459.69	62.308	1397.38	124.616	1522	0.0818765	0.486042
		0.07121	2386	607	1779	1214	2993	0.405613	0.405072		0.3396	1460.45	62.5516	1397.9	125.103	1523	0.0821426	0.487163
		0.07083	2387	607	1780	1214	2994	0.405478	0.405072		0.3394	1461.2	62.7958	1398.41	125.592	1524	0.0824091	0.488283
		0.07056	2388	607	1781	1214	2995	0.405342	0.405072		0.3385	1461.96	63.0405	1398.92	126.081	1525	0.082676	0.4894
		0.07053	2390	607	1783	1214	2997	0.405072	0.405072		0.3368	1462.71	63.2857	1399.43	126.571	1526	0.0829433	0.490515
		0.07048	2390	608	1782	1216	2998	0.405604	0.405459		0.3362	1463.47	63.5315	1399.94	127.063	1527	0.0832109	0.491628
		0.06997	2390	609	1781	1218	2999	0.406135	0.405459		0.3359	1464.22	63.7779	1400.44	127.556	1528	0.0834789	0.493295
		0.06987	2391	609	1782	1218	3000	0.406	0.405459		0.3359	1464.98	64.0248	1400.95	128.05	1529	0.0837473	0.493295
		0.06963	2392	609	1783	1218	3001	0.405865	0.405459		0.3351	1465.73	64.2723	1401.46	128.545	1530	0.0840161	0.494957
		0.06962	2393	609	1784	1218	3002	0.40573	0.405459		0.3344	1466.48	64.5203	1401.96	129.041	1531	0.0842852	0.496614
		0.06955	2394	609	1785	1218	3003	0.405594	0.405459		0.3344	1467.23	64.7689	1402.46	129.538	1532	0.0845547	0.496614
		0.06953	2395	609	1786	1218	3004	0.405459	0.405459		0.3341	1467.98	65.0181	1402.96	130.036	1533	0.0848246	0.498267
		0.06923	2395	610	1785	1220	3005	0.40599	0.40572		0.3337	1468.73	65.2677	1403.46	130.535	1534	0.0850948	0.499915
		0.06903	2397	610	1787	1220	3007	0.40572	0.40572		0.3337	1469.48	65.518	1403.96	131.036	1535	0.0853654	0.499915
		0.06897	2397	611	1786	1222	3008	0.40625	0.40624		0.3336	1470.23	65.7687	1404.46	131.537	1536	0.0856364	0.502652
		0.06861	2397	612	1785	1224	3009	0.40678	0.40624		0.3336	1470.98	66.0201	1404.96	132.04	1537	0.0859077	0.502652
		0.06857	2398	612	1786	1224	3010	0.406645	0.40624		0.3336	1471.73	66.2719	1405.46	132.544	1538	0.0861794	0.502652
		0.06854	2399	612	1787	1224	3011	0.406509	0.40624		0.331	1472.48	66.5244	1405.95	133.049	1539	0.0864514	0.504831
		0.06849	2400	612	1788	1224	3012	0.406375	0.40624		0.3309	1473.22	66.7773	1406.45	133.555	1540	0.0867238	0.505918
		0.06832	2401	612	1789	1224	3013	0.40624	0.40624		0.3305	1473.97	67.0308	1406.94	134.062	1541	0.0869965	0.507002
		0.06831	2401	613	1788	1226	3014	0.406768	0.406768		0.3304	1474.72	67.2849	1407.43	134.57	1542	0.0872696	0.508085
		0.06822	2401	614	1787	1228	3015	0.407297	0.407126		0.33	1475.46	67.5394	1407.92	135.079	1543	0.087543	0.509165
		0.06819	2401	615	1786	1230	3016	0.407825	0.407126		0.3296	1476.21	67.7946	1408.41	135.589	1544	0.0878168	0.510243
		0.06805	2401	616	1785	1232	3017	0.408353	0.407126		0.3291	1476.95	68.0502	1408.9	136.1	1545	0.0880909	0.511318
		0.06798	2402	616	1786	1232	3018	0.408217	0.407126		0.3284	1477.69	68.3064	1409.39	136.613	1546	0.0883654	0.512392
		0.06772	2403	616	1787	1232	3019	0.408082	0.407126		0.3274	1478.44	68.5632	1409.87	137.126	1547	0.0886401	0.513463
		0.0676	2403	617	1786	1234	3020	0.408609	0.407126		0.3272	1479.18	68.8204	1410.36	137.641	1548	0.0889153	0.515066
		0.06758	2404	617	1787	1234	3021	0.408474	0.407126		0.3272	1479.92	69.0782	1410.84	138.156	1549	0.0891907	0.515066
		0.06722	2405	617	1788	1234	3022	0.408339	0.407126		0.3258	1480.66	69.3365	1411.33	138.673	1550	0.0894665	0.516663
		0.06715	2406	617	1789	1234	3023	0.408204	0.407126		0.3249	1481.4	69.5954	1411.81	139.191	1551	0.0897426	0.517725
		0.06706	2410	617	1793	1234	3027	0.407664	0.407126		0.3242	1482.15	69.8548	1412.29	139.71	1552	0.0900191	0.518785
		0.06697	2411	617	1794	1234	3028	0.40753	0.407126		0.321	1482.89	70.1147	1412.77	140.229	1553	0.0902958	0.52037
		0.0669	2412	617	1795	1234	3029	0.407395	0.407126		0.321	1483.62	70.3752	1413.25	140.75	1554	0.0905729	0.52037
		0.06677	2414	617	1797	1234	3031	0.407126	0.407126		0.3189	1484.36	70.6361	1413.73	141.272	1555	0.0908504	0.52195
		0.06668	2414	618	1796	1236	3032	0.407652	0.407517		0.3187	1485.1	70.8976	1414.2	141.795	1556	0.0911281	0.523001
		0.06659	2415	618	1797	1236	3033	0.407517	0.407517		0.3177	1485.84	71.1597	1414.68	142.319	1557	0.0914061	0.524049
		0.06658	2415	619	1796	1238	3034	0.408042	0.408042		0.3172	1486.58	71.4222	1415.16	142.844	1558	0.0916845	0.525094
		0.06636	2416	620	1796	1240	3036	0.408432	0.408432		0.3167	1487.31	71.6853	1415.63	143.371	1559	0.0919632	0.526137
		0.06607	2416	621	1795	1242	3037	0.408956	0.408956		0.3165	1488.05	71.9489	1416.1	143.898	1560	0.0922422	0.527178
		0.06606	2416	622	1794	1244	3038	0.40948	0.409345		0.3161	1488.79	72.213	1416.57	144.426	1561	0.0925214	0.528217
		0.06598	2417	622	1795	1244	3039	0.409345	0.409345		0.315	1489.52	72.4776	1417.04	144.955	1562	0.092801	0.52977
		0.06595	2417	623	1794	1246	3040	0.409868	0.409868		0.315	1490.26	72.7428	1417.51	145.486	1563	0.0930809	0.52977
		0.06593	2417	624	1793	1248	3041	0.410391	0.410391		0.3146	1490.99	73.0084	1417.98	146.017	1564	0.0933611	0.532346
		0.06562	2417	626	1791	1252	3043	0.411436	0.411436		0.3146	1491.73	73.2746	1418.45	146.549	1565	0.0936416	0.532346
		0.06555	2417	627	1790	1254	3044	0.411958	0.411919		0.3146	1492.46	73.5413	1418.92	147.083	1566	0.0939224	0.532346
		0.06551	2417	628	1789	1256	3045	0.412479	0.411919		0.3143	1493.19	73.8085	1419.38	147.617	1567	0.0942035	0.534395
		0.06539	2417	629	1788	1258	3046	0.413001	0.411919		0.3135	1493.92	74.0762	1419.85	148.152	1568	0.0944849	0.535416
		0.06534	2418	629	1789	1258	3047	0.412865	0.411919		0.3121	1494.66	74.3444	1420.31	148.689	1569	0.0947666	0.536435
		0.06528	2419	629	1790	1258	3048	0.41273	0.411919		0.3108	1495.39	74.6131	1420.77	149.226	1570	0.0950486	0.537451
		0.06527	2421	629	1792	1258	3050	0.412459	0.411919		0.3102	1496.12	74.8824	1421.24	149.765	1571	0.0953308	0.538464
		0.06519	2424	629	1795	1258	3053	0.412054	0.411919		0.3099	1496.85	75.1521	1421.7	150.304	1572	0.0956133	0.539475
		0.06491	2425	629	1796	1258	3054	0.411919	0.411919		0.3092	1497.58	75.4223	1422.16	150.845	1573	0.0958962	0.540987
		0.06483	2425	630	1795	1260	3055	0.412439	0.412439		0.3092	1498.31	75.6931	1422.61	151.386	1574	0.0961793	0.540987
		0.0647	2425	631	1794	1262	3056	0.412958	0.412937		0.3089	1499.04	75.9643	1423.07	151.929	1575	0.0964626	0.542493
		0.06462	2425	632	1793	1264	3057	0.413477	0.412937		0.3086	1499.76	76.2361	1423.53	152.472	1576	0.0967463	0.543494
		0.06457	2426	632	1794	1264	3058	0.413342	0.412937		0.3064	1500.49	76.5083	1423.98	153.017	1577	0.0970302	0.544492
		0.06442	2427	632	1795	1264	3059	0.413207	0.412937		0.3041	1501.22	76.7811	1424.44	153.562	1578	0.0973144	0.545487
		0.06435	2428	632	1796	1264	3060	0.413072	0.412937		0.3039	1501.95	77.0543	1424.89	154.109	1579	0.0975989	0.54648
		0.0643	2429	632	1797	1264	3061	0.412937	0.412937		0.3037	1502.67	77.328	1425.34	154.656	1580	0.0978836	0.54747
		0.06429	2429	633	1796	1266	3062	0.413455	0.413185		0.3007	1503.4	77.6023	1425.8	155.205	1581	0.0981686	0.548458
		0.06409	2430	633	1797	1266	3063	0.41332	0.413185		0.3003	1504.12	77.877	1426.25	155.754	1582	0.0984538	0.549443
		0.06407	2431	633	1798	1266	3064	0.413185	0.413185		0.3001	1504.85	78.1522	1426.7	156.304	1583	0.0987394	0.550426
		0.06397	2431	634	1797	1268	3065	0.413703	0.413568		0.299	1505.57	78.4279	1427.14	156.856	1584	0.0990251	0.551405
		0.06395	2432	634	1798	1268	3066	0.413568	0.413568		0.2983	1506.3	78.7041	1427.59	157.408	1585	0.0993112	0.552382
		0.06386	2432	635	1797	1270	3067	0.414085	0.413681		0.2979	1507.02	78.9808	1428.04	157.962	1586	0.0995974	0.553357
		0.0638	2433	635	1798	1270	3068	0.41395	0.413681		0.2963	1507.74	79.2579	1428.48	158.516	1587	0.099884	0.554329
		0.06376	2434	635	1799	1270	3069	0.413816	0.413681		0.2956	1508.46	79.5356	1428.93	159.071	1588	0.100171	0.555298
		0.06363	2435	635	1800	1270	3070	0.413681	0.413681		0.2955	1509.19	79.8137	1429.37	159.627	1589	0.100458	0.556264
		0.06353	2435	636	1799	1272	3071	0.414197	0.414197		0.2951	1509.91	80.0923	1429.82	160.185	1590	0.100745	0.557228
		0.06345	2435	637	1798	1274	3072	0.414714	0.414444		0.2924	1510.63	80.3714	1430.26	160.743	1591	0.101033	0.558189
		0.06335	2436	637	1799	1274	3073	0.414579	0.414444		0.2917	1511.35	80.651	1430.7	161.302	1592	0.10132	0.559147
		0.06326	2437	637	1800	1274	3074	0.414444	0.414444		0.2895	1512.07	80.931	1431.14	161.862	1593	0.101608	0.560102
		0.06324	2437	638	1799	1276	3075	0.414959	0.414824		0.2879	1512.79	81.2116	1431.58	162.423	1594	0.101897	0.561531
		0.06319	2438	638	1800	1276	3076	0.414824	0.414824		0.2879	1513.51	81.4926	1432.01	162.985	1595	0.102185	0.561531
		0.06318	2438	639	1799	1278	3077	0.41534	0.41507		0.2876	1514.23	81.7741	1432.45	163.548	1596	0.102474	0.562953
		0.06314	2439	639	1800	1278	3078	0.415205	0.41507		0.2863	1514.94	82.056	1432.89	164.112	1597	0.102763	0.564369
		0.06304	2440	639	1801	1278	3079	0.41507	0.41507		0.2863	1515.66	82.3384	1433.32	164.677	1598	0.103052	0.564369
		0.063	2440	640	1800	1280	3080	0.415584	0.41545		0.286	1516.38	82.6213	1433.76	165.243	1599	0.103341	0.565779
		0.06286	2441	640	1801	1280	3081	0.41545	0.41545		0.2848	1517.1	82.9047	1434.19	165.809	1600	0.103631	0.566715
		0.06274	2441	641	1800	1282	3082	0.415964	0.415964		0.2843	1517.81	83.1885	1434.62	166.377	1601	0.103921	0.567649
		0.0626	2441	642	1799	1284	3083	0.416477	0.416477		0.2838	1518.53	83.4728	1435.05	166.946	1602	0.104211	0.568579
		0.06254	2441	643	1798	1286	3084	0.416991	0.416856		0.2827	1519.24	83.7575	1435.48	167.515	1603	0.104501	0.569507
		0.06252	2442	643	1799	1286	3085	0.416856	0.416856		0.2807	1519.96	84.0428	1435.91	168.086	1604	0.104791	0.570433
		0.06234	2442	644	1798	1288	3086	0.417369	0.417234		0.2803	1520.67	84.3284	1436.34	168.657	1605	0.105082	0.571355
		0.06226	2443	644	1799	1288	3087	0.417234	0.417234		0.2796	1521.39	84.6146	1436.77	169.229	1606	0.105373	0.572275
		0.06224	2443	645	1798	1290	3088	0.417746	0.417746		0.2792	1522.1	84.9012	1437.2	169.802	1607	0.105664	0.573192
		0.06222	2443	646	1797	1292	3089	0.418258	0.418123		0.2786	1522.81	85.1882	1437.62	170.376	1608	0.105955	0.574106
		0.062	2444	646	1798	1292	3090	0.418123	0.418123		0.2785	1523.52	85.4757	1438.05	170.951	1609	0.106247	0.575018
		0.06197	2445	647	1798	1294	3092	0.418499	0.418499		0.2781	1524.24	85.7637	1438.47	171.527	1610	0.106539	0.575926
		0.06196	2445	648	1797	1296	3093	0.419011	0.419011		0.2773	1524.95	86.0521	1438.9	172.104	1611	0.106831	0.576832
		0.06191	2445	649	1796	1298	3094	0.419522	0.419115		0.2772	1525.66	86.341	1439.32	172.682	1612	0.107123	0.577735
		0.06185	2446	649	1797	1298	3095	0.419386	0.419115		0.2769	1526.37	86.6303	1439.74	173.261	1613	0.107415	0.578635
		0.06184	2447	649	1798	1298	3096	0.419251	0.419115		0.2766	1527.08	86.9201	1440.16	173.84	1614	0.107708	0.579532
		0.06175	2448	649	1799	1298	3097	0.419115	0.419115		0.2756	1527.79	87.2103	1440.58	174.421	1615	0.108	0.580873
		0.06166	2448	650	1798	1300	3098	0.419626	0.419626		0.2756	1528.5	87.5009	1441	175.002	1616	0.108293	0.580873
		0.06155	2448	651	1797	1302	3099	0.420136	0.42		0.2754	1529.21	87.792	1441.42	175.584	1617	0.108586	0.582207
		0.06144	2449	651	1798	1302	3100	0.42	0.42		0.2742	1529.92	88.0836	1441.83	176.167	1618	0.10888	0.583093
		0.06126	2449	652	1797	1304	3101	0.42051	0.420374		0.2736	1530.62	88.3756	1442.25	176.751	1619	0.109173	0.583976
		0.0611	2450	652	1798	1304	3102	0.420374	0.420374		0.2734	1531.33	88.668	1442.66	177.336	1620	0.109467	0.585296
		0.06103	2450	653	1797	1306	3103	0.420883	0.420883		0.2734	1532.04	88.9609	1443.08	177.922	1621	0.10976	0.585296
		0.06097	2450	654	1796	1308	3104	0.421392	0.42112		0.2731	1532.75	89.2542	1443.49	178.508	1622	0.110054	0.586609
		0.06074	2452	654	1798	1308	3106	0.42112	0.42112		0.2721	1533.45	89.5479	1443.9	179.096	1623	0.110349	0.587916
		0.06071	2452	655	1797	1310	3107	0.421629	0.421629		0.2721	1534.16	89.8421	1444.32	179.684	1624	0.110643	0.587916
		0.06069	2452	656	1796	1312	3108	0.422136	0.422136		0.2716	1534.86	90.1367	1444.73	180.273	1625	0.110937	0.589216
[truncated: 1,969 more rows]

## Sheet: Spectral Level Data
Spectral Level Data		Confidence Threshold	Forward	Reverse	Correct	Incorrect	Total	Global FDR	q-value		Fit Confidence Threshold	Fit Forward	Fit Reverse	Fit Correct	Fit Incorrect	Fit Total	Fit Global FDR	Fit Local FDR
[truncated: 11,990 more rows]

[truncated: 13 more sheets: Search Summary, Advanced Metadata, Speed and Distribution Analysis, Single Results Table, Protein FDR Summary, Distinct Peptide FDR Summary, Spectrum FDR Summary, PDST Controls, Protein Summary, Peptide Summary, Distinct Peptide Summary, Feature Summary, Single Column Summary]
