# Supplementary material for: In vivo proteomic mapping through GFP-directed proximity-dependent biotin labelling in zebrafish
Source: eLife. 2021 Feb 16;10:e64631. doi: 10.7554/eLife.64631 (PMC7906605; doi:10.7554/eLife.64631)
Supplement: Figure 5—source data 3. [file elife-64631-fig5-data3.xlsx]

## Sheet: Metadata
_RESULTS_version	5
RESULTS_SEARCH_STAT_search_begin_time_clock	01/19/2021 16:08:23
RESULTS_SEARCH_STAT_search_end_time_clock	01/20/2021 17:43:38
RESULTS_SEARCH_STAT_search_time_duration	#VALUE!
RESULTS_SEARCH_STAT_stage_signal_processing_begin_time_clock	01/19/2021 16:08:24
RESULTS_SEARCH_STAT_stage_signal_processing_end_time_clock	01/20/2021 15:33:01
RESULTS_SEARCH_STAT_stage_signal_processing_time_duration	#VALUE!
RESULTS_SEARCH_STAT_stage_waiting_begin_time_clock	01/20/2021 15:33:01
RESULTS_SEARCH_STAT_stage_waiting_end_time_clock	01/20/2021 15:35:56
RESULTS_SEARCH_STAT_stage_waiting_time_duration	2379-07-30
RESULTS_SEARCH_STAT_stage_searching_begin_time_clock	01/20/2021 15:35:56
RESULTS_SEARCH_STAT_stage_searching_end_time_clock	01/20/2021 17:41:45
RESULTS_SEARCH_STAT_stage_searching_time_duration	#VALUE!
RESULTS_SEARCH_STAT_stage_fdr_begin_time_clock	01/20/2021 17:41:45
RESULTS_SEARCH_STAT_stage_fdr_end_time_clock	01/20/2021 17:43:38
RESULTS_SEARCH_STAT_stage_fdr_time_duration	2208-02-16
RESULTS_SEARCH_STAT_task_fraglet_exe_begin_time_clock	01/20/2021 16:21:19
RESULTS_SEARCH_STAT_task_fraglet_exe_end_time_clock	01/20/2021 16:40:22
RESULTS_SEARCH_STAT_task_fraglet_exe_time_duration	1143055
RESULTS_SEARCH_STAT_task_fraglet_exe_time_cpu	#VALUE!
RESULTS_SEARCH_STAT_task_taglet_exe_begin_time_clock	01/20/2021 16:45:48
RESULTS_SEARCH_STAT_task_taglet_exe_end_time_clock	01/20/2021 17:36:14
RESULTS_SEARCH_STAT_task_taglet_exe_time_duration	3026315
RESULTS_SEARCH_STAT_task_taglet_exe_time_cpu	#VALUE!
RESULTS_SEARCH_STAT_task_progroup_begin_time_clock	01/20/2021 17:36:14
RESULTS_SEARCH_STAT_task_progroup_end_time_clock	01/20/2021 17:41:45
RESULTS_SEARCH_STAT_task_progroup_time_duration	330233
RESULTS_SEARCH_STAT_task_progroup_time_cpu	2824-09-13
RESULTS_SEARCH_STAT_task_focusing_begin_time_clock	01/20/2021 16:40:22
RESULTS_SEARCH_STAT_task_focusing_end_time_clock	01/20/2021 16:45:48
RESULTS_SEARCH_STAT_task_focusing_time_duration	325834
RESULTS_SEARCH_STAT_task_focusing_time_cpu	191850
RESULTS_SEARCH_STAT_computer_memory	32767
RESULTS_SEARCH_STAT_computer_name	IMB-MASS02
RESULTS_SEARCH_STAT_num_proteins	150424
RESULTS_SEARCH_STAT_num_residues	75708562
RESULTS_SEARCH_STAT_number_cores	8
RESULTS_SEARCH_STAT_number_licensed_tasks	16
RESULTS_SEARCH_STAT_number_processors	8
RESULTS_SEARCH_STAT_os	Windows Server 2008 R2 Standard (6.1.7600)
RESULTS_SEARCH_1_time_cpu	92804
RESULTS_SEARCH_1_time_duration	103790
RESULTS_SEARCH_1_version	5.0.1.4874
RESULTS_SEARCH_1_xml:id	SEARCH:1:637466692955257639_0
RESULTS_SEARCH_1_PARAMETERS_chemical_data_edited	FALSE
RESULTS_SEARCH_1_PARAMETERS_do_multiprecursor_search	TRUE
RESULTS_SEARCH_1_PARAMETERS_do_reverse_search	TRUE
RESULTS_SEARCH_1_PARAMETERS_max_quant_labels	35
RESULTS_SEARCH_1_PARAMETERS_maxresults	15
RESULTS_SEARCH_1_PARAMETERS_separate_searches	FALSE
RESULTS_SEARCH_1_PARAMETERS_MSTOLERANCE_type	dalton
RESULTS_SEARCH_1_PARAMETERS_MSTOLERANCE_value	0.05
RESULTS_SEARCH_1_PARAMETERS_MSMSTOLERANCE_type	dalton
RESULTS_SEARCH_1_PARAMETERS_MSMSTOLERANCE_value	0.1
RESULTS_SEARCH_1_PARAMETERS_MS_STANDARD_DEVIATION_type	dalton
RESULTS_SEARCH_1_PARAMETERS_MS_STANDARD_DEVIATION_value	0.0011
RESULTS_SEARCH_1_PARAMETERS_MSMS_STANDARD_DEVIATION_type	dalton
RESULTS_SEARCH_1_PARAMETERS_MSMS_STANDARD_DEVIATION_value	0.01
RESULTS_SEARCH_1_PARAMETERS_FASTA_filename	C:\AB SCIEX\ProteinPilot Data\SearchDatabases\uniprot-zebrafish_with_Clover.fasta
RESULTS_SEARCH_1_PARAMETERS_AUTO_CALIBRATION_ms	TRUE
RESULTS_SEARCH_1_PARAMETERS_AUTO_CALIBRATION_msexport	FALSE
RESULTS_SEARCH_1_PARAMETERS_AUTO_CALIBRATION_msms	TRUE
RESULTS_SEARCH_1_PARAMETERS_AUTO_CALIBRATION_msmstolsdratio	2.75
RESULTS_SEARCH_1_PARAMETERS_AUTO_CALIBRATION_mstolsdratio	7
RESULTS_SEARCH_1_PARAMETERS_AUTO_CALIBRATION_squareroot	TRUE
RESULTS_SEARCH_1_PARAMETERS_AUTO_CALIBRATION_type	dalton
RESULTS_SEARCH_1_PARAMETERS_AUTO_CALIBRATION_MCP_d_s_s_f	0.0666667
RESULTS_SEARCH_1_PARAMETERS_AUTO_CALIBRATION_MCP_d_s_w_f	3
RESULTS_SEARCH_1_PARAMETERS_AUTO_CALIBRATION_MCP_m_f_r_mbc	200
RESULTS_SEARCH_1_PARAMETERS_AUTO_CALIBRATION_MCP_m_m_c	10
RESULTS_SEARCH_1_PARAMETERS_AUTO_CALIBRATION_MCP_m_m_f_s	0.25
RESULTS_SEARCH_1_PARAMETERS_AUTO_CALIBRATION_MCP_m_m_p_f	0.33
RESULTS_SEARCH_1_PARAMETERS_AUTO_CALIBRATION_MCP_m_m_p_rms_f	1
RESULTS_SEARCH_1_PARAMETERS_AUTO_CALIBRATION_MCP_m_p_t_f	1
RESULTS_SEARCH_1_PARAMETERS_AUTO_CALIBRATION_MCP_m_r_h_n_b	15
RESULTS_SEARCH_1_PARAMETERS_AUTO_CALIBRATION_MCP_m_z_n_s	99
RESULTS_SEARCH_1_PARAMETERS_AUTO_CALIBRATION_MCP_m_z_s_mn_f_r	0.0666667
RESULTS_SEARCH_1_PARAMETERS_AUTO_CALIBRATION_MCP_m_z_s_mx_f_r	0.1
RESULTS_SEARCH_1_PARAMETERS_MS_AUTO_CALIBRATION_OUT_avres	1.82356e-07
RESULTS_SEARCH_1_PARAMETERS_MS_AUTO_CALIBRATION_OUT_c0	9.31817e-05
RESULTS_SEARCH_1_PARAMETERS_MS_AUTO_CALIBRATION_OUT_c1minus1	-3.57572e-06
RESULTS_SEARCH_1_PARAMETERS_MS_AUTO_CALIBRATION_OUT_c2	0
RESULTS_SEARCH_1_PARAMETERS_MS_AUTO_CALIBRATION_OUT_file	1
RESULTS_SEARCH_1_PARAMETERS_MS_AUTO_CALIBRATION_OUT_partnumber	1
RESULTS_SEARCH_1_PARAMETERS_MS_AUTO_CALIBRATION_OUT_polyorder	1
RESULTS_SEARCH_1_PARAMETERS_MS_AUTO_CALIBRATION_OUT_sample	1
RESULTS_SEARCH_1_PARAMETERS_MS_AUTO_CALIBRATION_OUT_squareroot	TRUE
RESULTS_SEARCH_1_PARAMETERS_MSMS_AUTO_CALIBRATION_OUT_avres	-8.68775e-08
RESULTS_SEARCH_1_PARAMETERS_MSMS_AUTO_CALIBRATION_OUT_c0	-7.85724e-06
RESULTS_SEARCH_1_PARAMETERS_MSMS_AUTO_CALIBRATION_OUT_c1minus1	7.20397e-07
RESULTS_SEARCH_1_PARAMETERS_MSMS_AUTO_CALIBRATION_OUT_c2	0
RESULTS_SEARCH_1_PARAMETERS_MSMS_AUTO_CALIBRATION_OUT_file	1
RESULTS_SEARCH_1_PARAMETERS_MSMS_AUTO_CALIBRATION_OUT_partnumber	1
RESULTS_SEARCH_1_PARAMETERS_MSMS_AUTO_CALIBRATION_OUT_polyorder	1
RESULTS_SEARCH_1_PARAMETERS_MSMS_AUTO_CALIBRATION_OUT_sample	1
RESULTS_SEARCH_1_PARAMETERS_MSMS_AUTO_CALIBRATION_OUT_squareroot	TRUE
RESULTS_SEARCH_1_PARAMETERS_MAX_PRECURSORS_FRAGLET	5
RESULTS_SEARCH_1_PARAMETERS_MAX_PRECURSORS_TAGLET	1
RESULTS_SEARCH_1_PARAMETERS_PRECURSORS_DR_FRAGLET	10
RESULTS_SEARCH_1_PARAMETERS_PRECURSORS_DR_TAGLET	3
RESULTS_SEARCH_1_PARAMETERS_DEFAULT_CHARGE_STATE_1_charge	2
RESULTS_SEARCH_1_PARAMETERS_DEFAULT_CHARGE_STATE_1_probability	1
RESULTS_SEARCH_1_PARAMETERS_DEFAULT_CHARGE_STATE_2_charge	3
RESULTS_SEARCH_1_PARAMETERS_DEFAULT_CHARGE_STATE_2_probability	1
RESULTS_SEARCH_1_PARAMETERS_DEFAULT_CHARGE_STATE_3_charge	4
RESULTS_SEARCH_1_PARAMETERS_DEFAULT_CHARGE_STATE_3_probability	1
RESULTS_SEARCH_1_PARAMETERS_VERSION	5.0.1.0, 4895
RESULTS_SEARCH_1_PARAMETERS_PARAGON_VERSION	5.0.1.0, 4874
RESULTS_SEARCH_1_PARAMETERS_APPLICATION	ProteinPilot(tm) Software
RESULTS_SEARCH_1_PARAMETERS_PROGROUP_alternativedispositionmaximumfoldprobabilitydrop	100
RESULTS_SEARCH_1_PARAMETERS_PROGROUP_alternativedispositionmaximumfoldscoredrop	2
RESULTS_SEARCH_1_PARAMETERS_PROGROUP_autodiscordantpeptidethreshold	0.3
RESULTS_SEARCH_1_PARAMETERS_PROGROUP_bayesconfidencecalclulation	TRUE
RESULTS_SEARCH_1_PARAMETERS_PROGROUP_calibrateconfidence	TRUE
RESULTS_SEARCH_1_PARAMETERS_PROGROUP_compresspeptides	FALSE
RESULTS_SEARCH_1_PARAMETERS_PROGROUP_confidencepercentthresholdforexcludingothersfromquant	15
RESULTS_SEARCH_1_PARAMETERS_PROGROUP_confidencepercentthresholdforincludingselfinquant	15
RESULTS_SEARCH_1_PARAMETERS_PROGROUP_donotstoremspeaklists	FALSE
RESULTS_SEARCH_1_PARAMETERS_PROGROUP_fasta	C:\AB SCIEX\ProteinPilot Data\SearchDatabases\uniprot-zebrafish_with_Clover.fasta
RESULTS_SEARCH_1_PARAMETERS_PROGROUP_featuregroupminpepconf	0.66
RESULTS_SEARCH_1_PARAMETERS_PROGROUP_featuregroupminups	0.47
RESULTS_SEARCH_1_PARAMETERS_PROGROUP_focusingintersection	4
RESULTS_SEARCH_1_PARAMETERS_PROGROUP_focusingminimummatchconfidence	0.1
RESULTS_SEARCH_1_PARAMETERS_PROGROUP_focusingminunusedprotscore	0.1
RESULTS_SEARCH_1_PARAMETERS_PROGROUP_focusingsubsetcutoff	6
RESULTS_SEARCH_1_PARAMETERS_PROGROUP_intersection	1.3
RESULTS_SEARCH_1_PARAMETERS_PROGROUP_minimummatchconfidencecutoff	0.001
RESULTS_SEARCH_1_PARAMETERS_PROGROUP_minunusedprotscore	0.0458
RESULTS_SEARCH_1_PARAMETERS_PROGROUP_subsetcutoff	2
RESULTS_SEARCH_1_PARAMETERS_PROGROUP_unusedprotscorethresholdforexcludingothersfromquant	1.3
RESULTS_SEARCH_1_PARAMETERS_PEAKLIST_count	1907-03-23
RESULTS_SEARCH_1_PARAMETERS_PEAKLIST_filenumber	1
RESULTS_SEARCH_1_PARAMETERS_PEAKLIST_original_count	2640
RESULTS_SEARCH_1_PARAMETERS_PEAKLIST_originalfilename	C:\AB SCIEX\ProteinPilot Data\Results\Albert\ZX 20200624 6600\ZX 20200624 C4A 1.wiff
RESULTS_SEARCH_1_PARAMETERS_PEAKLIST_partnumber	1
RESULTS_SEARCH_1_PARAMETERS_QUANT_TYPE_background_correction	FALSE
RESULTS_SEARCH_1_PARAMETERS_QUANT_TYPE_bias_correction	TRUE
RESULTS_SEARCH_1_PARAMETERS_QUANT_TYPE_keep_extreme_peptides_over_fraction	0
RESULTS_SEARCH_1_PARAMETERS_QUANT_TYPE_low_confidence_check	TRUE
RESULTS_SEARCH_1_PARAMETERS_QUANT_TYPE_low_intensity_check	TRUE
RESULTS_SEARCH_1_PARAMETERS_QUANT_TYPE_median_statistic	TRUE
RESULTS_SEARCH_1_PARAMETERS_QUANT_TYPE_mod_check	TRUE
RESULTS_SEARCH_1_PARAMETERS_QUANT_TYPE_quant_threshold	-1
RESULTS_SEARCH_1_PARAMETERS_QUANT_TYPE_quant_threshold_sn	9
RESULTS_SEARCH_1_PARAMETERS_QUANT_TYPE_separate_searches	FALSE
RESULTS_SEARCH_1_PARAMETERS_QUANT_TYPE_shared_msms_check	TRUE
RESULTS_SEARCH_1_PARAMETERS_PARAGON_METHOD_SETTINGS_UI_SAMPLE_TYPE	Identification
RESULTS_SEARCH_1_PARAMETERS_PARAGON_METHOD_SETTINGS_UI_CYS_ALKYLATION	Iodoacetamide w other Cys mods possible
RESULTS_SEARCH_1_PARAMETERS_PARAGON_METHOD_SETTINGS_UI_DIGESTION	Trypsin + Lys C
RESULTS_SEARCH_1_PARAMETERS_PARAGON_METHOD_SETTINGS_UI_SPECIAL_FACTOR	Gel-based ID
RESULTS_SEARCH_1_PARAMETERS_PARAGON_METHOD_SETTINGS_UI_INSTRUMENT	TripleTOF 6600
RESULTS_SEARCH_1_PARAMETERS_PARAGON_METHOD_SETTINGS_UI_SEARCH_EFFORT	Thorough
RESULTS_SEARCH_1_PARAMETERS_PARAGON_METHOD_SETTINGS_UI_USER_NAME	IMB-MASS02\massuser
RESULTS_SEARCH_1_PARAMETERS_PARAGON_METHOD_SETTINGS_UI_MACHINE_NAME	IMB-MASS02
RESULTS_SEARCH_1_PARAMETERS_PARAGON_METHOD_SETTINGS_UI_SEARCH_ID	6.37467e+17
RESULTS_SEARCH_1_PARAMETERS_PARAGON_METHOD_SETTINGS_UI_START_TIME	2021-01-19 16:08:23
RESULTS_SEARCH_1_PARAMETERS_PARAGON_METHOD_SETTINGS_UI_MIN_UNUSED_PROTSCORE	0.0458
RESULTS_SEARCH_1_PARAMETERS_PARAGON_METHOD_SETTINGS_UI_PSPEP	TRUE
RESULTS_SEARCH_2_time_cpu	159214
RESULTS_SEARCH_2_time_duration	180405
RESULTS_SEARCH_2_version	5.0.1.4874
RESULTS_SEARCH_2_xml:id	SEARCH:2:637466692955257639_0
RESULTS_SEARCH_2_PARAMETERS_chemical_data_edited	FALSE
RESULTS_SEARCH_2_PARAMETERS_do_multiprecursor_search	TRUE
RESULTS_SEARCH_2_PARAMETERS_do_reverse_search	TRUE
RESULTS_SEARCH_2_PARAMETERS_max_quant_labels	35
RESULTS_SEARCH_2_PARAMETERS_maxresults	15
RESULTS_SEARCH_2_PARAMETERS_separate_searches	FALSE
RESULTS_SEARCH_2_PARAMETERS_MSTOLERANCE_type	dalton
RESULTS_SEARCH_2_PARAMETERS_MSTOLERANCE_value	0.05
RESULTS_SEARCH_2_PARAMETERS_MSMSTOLERANCE_type	dalton
RESULTS_SEARCH_2_PARAMETERS_MSMSTOLERANCE_value	0.1
RESULTS_SEARCH_2_PARAMETERS_MS_STANDARD_DEVIATION_type	dalton
RESULTS_SEARCH_2_PARAMETERS_MS_STANDARD_DEVIATION_value	0.0011
RESULTS_SEARCH_2_PARAMETERS_MSMS_STANDARD_DEVIATION_type	dalton
RESULTS_SEARCH_2_PARAMETERS_MSMS_STANDARD_DEVIATION_value	0.01
RESULTS_SEARCH_2_PARAMETERS_FASTA_filename	C:\AB SCIEX\ProteinPilot Data\SearchDatabases\uniprot-zebrafish_with_Clover.fasta
RESULTS_SEARCH_2_PARAMETERS_AUTO_CALIBRATION_ms	TRUE
RESULTS_SEARCH_2_PARAMETERS_AUTO_CALIBRATION_msexport	FALSE
RESULTS_SEARCH_2_PARAMETERS_AUTO_CALIBRATION_msms	TRUE
RESULTS_SEARCH_2_PARAMETERS_AUTO_CALIBRATION_msmstolsdratio	2.75
RESULTS_SEARCH_2_PARAMETERS_AUTO_CALIBRATION_mstolsdratio	7
RESULTS_SEARCH_2_PARAMETERS_AUTO_CALIBRATION_squareroot	TRUE
RESULTS_SEARCH_2_PARAMETERS_AUTO_CALIBRATION_type	dalton
RESULTS_SEARCH_2_PARAMETERS_AUTO_CALIBRATION_MCP_d_s_s_f	0.0666667
RESULTS_SEARCH_2_PARAMETERS_AUTO_CALIBRATION_MCP_d_s_w_f	3
RESULTS_SEARCH_2_PARAMETERS_AUTO_CALIBRATION_MCP_m_f_r_mbc	200
RESULTS_SEARCH_2_PARAMETERS_AUTO_CALIBRATION_MCP_m_m_c	10
RESULTS_SEARCH_2_PARAMETERS_AUTO_CALIBRATION_MCP_m_m_f_s	0.25
RESULTS_SEARCH_2_PARAMETERS_AUTO_CALIBRATION_MCP_m_m_p_f	0.33
RESULTS_SEARCH_2_PARAMETERS_AUTO_CALIBRATION_MCP_m_m_p_rms_f	1
RESULTS_SEARCH_2_PARAMETERS_AUTO_CALIBRATION_MCP_m_p_t_f	1
RESULTS_SEARCH_2_PARAMETERS_AUTO_CALIBRATION_MCP_m_r_h_n_b	15
RESULTS_SEARCH_2_PARAMETERS_AUTO_CALIBRATION_MCP_m_z_n_s	99
RESULTS_SEARCH_2_PARAMETERS_AUTO_CALIBRATION_MCP_m_z_s_mn_f_r	0.0666667
RESULTS_SEARCH_2_PARAMETERS_AUTO_CALIBRATION_MCP_m_z_s_mx_f_r	0.1
RESULTS_SEARCH_2_PARAMETERS_MS_AUTO_CALIBRATION_OUT_avres	1.82356e-07
RESULTS_SEARCH_2_PARAMETERS_MS_AUTO_CALIBRATION_OUT_c0	9.31817e-05
RESULTS_SEARCH_2_PARAMETERS_MS_AUTO_CALIBRATION_OUT_c1minus1	-3.57572e-06
RESULTS_SEARCH_2_PARAMETERS_MS_AUTO_CALIBRATION_OUT_c2	0
RESULTS_SEARCH_2_PARAMETERS_MS_AUTO_CALIBRATION_OUT_file	1
RESULTS_SEARCH_2_PARAMETERS_MS_AUTO_CALIBRATION_OUT_partnumber	1900-01-01
RESULTS_SEARCH_2_PARAMETERS_MS_AUTO_CALIBRATION_OUT_polyorder	1
RESULTS_SEARCH_2_PARAMETERS_MS_AUTO_CALIBRATION_OUT_sample	1
RESULTS_SEARCH_2_PARAMETERS_MS_AUTO_CALIBRATION_OUT_squareroot	TRUE
RESULTS_SEARCH_2_PARAMETERS_MSMS_AUTO_CALIBRATION_OUT_avres	-8.68775e-08
RESULTS_SEARCH_2_PARAMETERS_MSMS_AUTO_CALIBRATION_OUT_c0	-7.85724e-06
RESULTS_SEARCH_2_PARAMETERS_MSMS_AUTO_CALIBRATION_OUT_c1minus1	7.20397e-07
RESULTS_SEARCH_2_PARAMETERS_MSMS_AUTO_CALIBRATION_OUT_c2	0
RESULTS_SEARCH_2_PARAMETERS_MSMS_AUTO_CALIBRATION_OUT_file	1
RESULTS_SEARCH_2_PARAMETERS_MSMS_AUTO_CALIBRATION_OUT_partnumber	1
RESULTS_SEARCH_2_PARAMETERS_MSMS_AUTO_CALIBRATION_OUT_polyorder	1
RESULTS_SEARCH_2_PARAMETERS_MSMS_AUTO_CALIBRATION_OUT_sample	1
RESULTS_SEARCH_2_PARAMETERS_MSMS_AUTO_CALIBRATION_OUT_squareroot	TRUE
RESULTS_SEARCH_2_PARAMETERS_MAX_PRECURSORS_FRAGLET	5
RESULTS_SEARCH_2_PARAMETERS_MAX_PRECURSORS_TAGLET	1
RESULTS_SEARCH_2_PARAMETERS_PRECURSORS_DR_FRAGLET	10
RESULTS_SEARCH_2_PARAMETERS_PRECURSORS_DR_TAGLET	3
RESULTS_SEARCH_2_PARAMETERS_DEFAULT_CHARGE_STATE_1_charge	2
RESULTS_SEARCH_2_PARAMETERS_DEFAULT_CHARGE_STATE_1_probability	1
RESULTS_SEARCH_2_PARAMETERS_DEFAULT_CHARGE_STATE_2_charge	3
RESULTS_SEARCH_2_PARAMETERS_DEFAULT_CHARGE_STATE_2_probability	1
RESULTS_SEARCH_2_PARAMETERS_DEFAULT_CHARGE_STATE_3_charge	4
RESULTS_SEARCH_2_PARAMETERS_DEFAULT_CHARGE_STATE_3_probability	1
RESULTS_SEARCH_2_PARAMETERS_VERSION	5.0.1.0, 4895
RESULTS_SEARCH_2_PARAMETERS_PARAGON_VERSION	5.0.1.0, 4874
RESULTS_SEARCH_2_PARAMETERS_APPLICATION	ProteinPilot(tm) Software
RESULTS_SEARCH_2_PARAMETERS_PROGROUP_alternativedispositionmaximumfoldprobabilitydrop	100
RESULTS_SEARCH_2_PARAMETERS_PROGROUP_alternativedispositionmaximumfoldscoredrop	2
RESULTS_SEARCH_2_PARAMETERS_PROGROUP_autodiscordantpeptidethreshold	0.3
RESULTS_SEARCH_2_PARAMETERS_PROGROUP_bayesconfidencecalclulation	TRUE
RESULTS_SEARCH_2_PARAMETERS_PROGROUP_calibrateconfidence	TRUE
RESULTS_SEARCH_2_PARAMETERS_PROGROUP_compresspeptides	FALSE
RESULTS_SEARCH_2_PARAMETERS_PROGROUP_confidencepercentthresholdforexcludingothersfromquant	15
RESULTS_SEARCH_2_PARAMETERS_PROGROUP_confidencepercentthresholdforincludingselfinquant	15
RESULTS_SEARCH_2_PARAMETERS_PROGROUP_donotstoremspeaklists	FALSE
RESULTS_SEARCH_2_PARAMETERS_PROGROUP_fasta	C:\AB SCIEX\ProteinPilot Data\SearchDatabases\uniprot-zebrafish_with_Clover.fasta
RESULTS_SEARCH_2_PARAMETERS_PROGROUP_featuregroupminpepconf	0.66
RESULTS_SEARCH_2_PARAMETERS_PROGROUP_featuregroupminups	0.47
RESULTS_SEARCH_2_PARAMETERS_PROGROUP_focusingintersection	4
RESULTS_SEARCH_2_PARAMETERS_PROGROUP_focusingminimummatchconfidence	0.1
RESULTS_SEARCH_2_PARAMETERS_PROGROUP_focusingminunusedprotscore	0.1
RESULTS_SEARCH_2_PARAMETERS_PROGROUP_focusingsubsetcutoff	6
RESULTS_SEARCH_2_PARAMETERS_PROGROUP_intersection	1.3
RESULTS_SEARCH_2_PARAMETERS_PROGROUP_minimummatchconfidencecutoff	0.001
RESULTS_SEARCH_2_PARAMETERS_PROGROUP_minunusedprotscore	0.0458
RESULTS_SEARCH_2_PARAMETERS_PROGROUP_subsetcutoff	2
RESULTS_SEARCH_2_PARAMETERS_PROGROUP_unusedprotscorethresholdforexcludingothersfromquant	1.3
RESULTS_SEARCH_2_PARAMETERS_PEAKLIST_count	2639
RESULTS_SEARCH_2_PARAMETERS_PEAKLIST_filenumber	1
RESULTS_SEARCH_2_PARAMETERS_PEAKLIST_original_count	2640
RESULTS_SEARCH_2_PARAMETERS_PEAKLIST_originalfilename	C:\AB SCIEX\ProteinPilot Data\Results\Albert\ZX 20200624 6600\ZX 20200624 C4A 1.wiff
RESULTS_SEARCH_2_PARAMETERS_PEAKLIST_partnumber	1
RESULTS_SEARCH_2_PARAMETERS_QUANT_TYPE_background_correction	FALSE
RESULTS_SEARCH_2_PARAMETERS_QUANT_TYPE_bias_correction	TRUE
RESULTS_SEARCH_2_PARAMETERS_QUANT_TYPE_keep_extreme_peptides_over_fraction	0
RESULTS_SEARCH_2_PARAMETERS_QUANT_TYPE_low_confidence_check	TRUE
RESULTS_SEARCH_2_PARAMETERS_QUANT_TYPE_low_intensity_check	TRUE
RESULTS_SEARCH_2_PARAMETERS_QUANT_TYPE_median_statistic	TRUE
RESULTS_SEARCH_2_PARAMETERS_QUANT_TYPE_mod_check	TRUE
RESULTS_SEARCH_2_PARAMETERS_QUANT_TYPE_quant_threshold	-1
RESULTS_SEARCH_2_PARAMETERS_QUANT_TYPE_quant_threshold_sn	9
RESULTS_SEARCH_2_PARAMETERS_QUANT_TYPE_separate_searches	FALSE
RESULTS_SEARCH_2_PARAMETERS_QUANT_TYPE_shared_msms_check	TRUE
RESULTS_SEARCH_2_PARAMETERS_PARAGON_METHOD_SETTINGS_UI_SAMPLE_TYPE	Identification
RESULTS_SEARCH_2_PARAMETERS_PARAGON_METHOD_SETTINGS_UI_CYS_ALKYLATION	Iodoacetamide w other Cys mods possible
RESULTS_SEARCH_2_PARAMETERS_PARAGON_METHOD_SETTINGS_UI_DIGESTION	Trypsin + Lys C
RESULTS_SEARCH_2_PARAMETERS_PARAGON_METHOD_SETTINGS_UI_SPECIAL_FACTOR	Gel-based ID
RESULTS_SEARCH_2_PARAMETERS_PARAGON_METHOD_SETTINGS_UI_INSTRUMENT	TripleTOF 6600
RESULTS_SEARCH_2_PARAMETERS_PARAGON_METHOD_SETTINGS_UI_SEARCH_EFFORT	Thorough
RESULTS_SEARCH_2_PARAMETERS_PARAGON_METHOD_SETTINGS_UI_USER_NAME	IMB-MASS02\massuser
RESULTS_SEARCH_2_PARAMETERS_PARAGON_METHOD_SETTINGS_UI_MACHINE_NAME	IMB-MASS02
RESULTS_SEARCH_2_PARAMETERS_PARAGON_METHOD_SETTINGS_UI_SEARCH_ID	6.37467e+17
RESULTS_SEARCH_2_PARAMETERS_PARAGON_METHOD_SETTINGS_UI_START_TIME	2021-01-19 16:08:23
RESULTS_SEARCH_2_PARAMETERS_PARAGON_METHOD_SETTINGS_UI_MIN_UNUSED_PROTSCORE	0.0458
RESULTS_SEARCH_2_PARAMETERS_PARAGON_METHOD_SETTINGS_UI_PSPEP	TRUE
RESULTS_SEARCH_3_time_cpu	157841
RESULTS_SEARCH_3_time_duration	180452
RESULTS_SEARCH_3_version	5.0.1.4874
RESULTS_SEARCH_3_xml:id	SEARCH:1:637466692955257639_1
RESULTS_SEARCH_3_PARAMETERS_chemical_data_edited	FALSE
RESULTS_SEARCH_3_PARAMETERS_do_multiprecursor_search	TRUE
RESULTS_SEARCH_3_PARAMETERS_do_reverse_search	TRUE
RESULTS_SEARCH_3_PARAMETERS_max_quant_labels	35
RESULTS_SEARCH_3_PARAMETERS_maxresults	15
RESULTS_SEARCH_3_PARAMETERS_separate_searches	FALSE
RESULTS_SEARCH_3_PARAMETERS_MSTOLERANCE_type	dalton
RESULTS_SEARCH_3_PARAMETERS_MSTOLERANCE_value	0.05
RESULTS_SEARCH_3_PARAMETERS_MSMSTOLERANCE_type	dalton
RESULTS_SEARCH_3_PARAMETERS_MSMSTOLERANCE_value	0.1
RESULTS_SEARCH_3_PARAMETERS_MS_STANDARD_DEVIATION_type	dalton
RESULTS_SEARCH_3_PARAMETERS_MS_STANDARD_DEVIATION_value	0.0011
RESULTS_SEARCH_3_PARAMETERS_MSMS_STANDARD_DEVIATION_type	dalton
RESULTS_SEARCH_3_PARAMETERS_MSMS_STANDARD_DEVIATION_value	0.01
RESULTS_SEARCH_3_PARAMETERS_FASTA_filename	C:\AB SCIEX\ProteinPilot Data\SearchDatabases\uniprot-zebrafish_with_Clover.fasta
RESULTS_SEARCH_3_PARAMETERS_AUTO_CALIBRATION_ms	TRUE
RESULTS_SEARCH_3_PARAMETERS_AUTO_CALIBRATION_msexport	FALSE
RESULTS_SEARCH_3_PARAMETERS_AUTO_CALIBRATION_msms	TRUE
RESULTS_SEARCH_3_PARAMETERS_AUTO_CALIBRATION_msmstolsdratio	2.75
RESULTS_SEARCH_3_PARAMETERS_AUTO_CALIBRATION_mstolsdratio	7
RESULTS_SEARCH_3_PARAMETERS_AUTO_CALIBRATION_squareroot	TRUE
RESULTS_SEARCH_3_PARAMETERS_AUTO_CALIBRATION_type	dalton
RESULTS_SEARCH_3_PARAMETERS_AUTO_CALIBRATION_MCP_d_s_s_f	0.0666667
RESULTS_SEARCH_3_PARAMETERS_AUTO_CALIBRATION_MCP_d_s_w_f	3
RESULTS_SEARCH_3_PARAMETERS_AUTO_CALIBRATION_MCP_m_f_r_mbc	200
RESULTS_SEARCH_3_PARAMETERS_AUTO_CALIBRATION_MCP_m_m_c	10
RESULTS_SEARCH_3_PARAMETERS_AUTO_CALIBRATION_MCP_m_m_f_s	0.25
RESULTS_SEARCH_3_PARAMETERS_AUTO_CALIBRATION_MCP_m_m_p_f	0.33
RESULTS_SEARCH_3_PARAMETERS_AUTO_CALIBRATION_MCP_m_m_p_rms_f	1
RESULTS_SEARCH_3_PARAMETERS_AUTO_CALIBRATION_MCP_m_p_t_f	1
RESULTS_SEARCH_3_PARAMETERS_AUTO_CALIBRATION_MCP_m_r_h_n_b	15
RESULTS_SEARCH_3_PARAMETERS_AUTO_CALIBRATION_MCP_m_z_n_s	99
RESULTS_SEARCH_3_PARAMETERS_AUTO_CALIBRATION_MCP_m_z_s_mn_f_r	0.0666667
RESULTS_SEARCH_3_PARAMETERS_AUTO_CALIBRATION_MCP_m_z_s_mx_f_r	0.1
RESULTS_SEARCH_3_PARAMETERS_MS_AUTO_CALIBRATION_OUT_avres	9.64322e-08
RESULTS_SEARCH_3_PARAMETERS_MS_AUTO_CALIBRATION_OUT_c0	0.000161648
RESULTS_SEARCH_3_PARAMETERS_MS_AUTO_CALIBRATION_OUT_c1minus1	-6.71565e-06
RESULTS_SEARCH_3_PARAMETERS_MS_AUTO_CALIBRATION_OUT_c2	0
RESULTS_SEARCH_3_PARAMETERS_MS_AUTO_CALIBRATION_OUT_file	2
RESULTS_SEARCH_3_PARAMETERS_MS_AUTO_CALIBRATION_OUT_partnumber	2
RESULTS_SEARCH_3_PARAMETERS_MS_AUTO_CALIBRATION_OUT_polyorder	1
RESULTS_SEARCH_3_PARAMETERS_MS_AUTO_CALIBRATION_OUT_sample	1
RESULTS_SEARCH_3_PARAMETERS_MS_AUTO_CALIBRATION_OUT_squareroot	TRUE
RESULTS_SEARCH_3_PARAMETERS_MSMS_AUTO_CALIBRATION_OUT_avres	1.96508e-08
RESULTS_SEARCH_3_PARAMETERS_MSMS_AUTO_CALIBRATION_OUT_c0	-1.26721e-05
RESULTS_SEARCH_3_PARAMETERS_MSMS_AUTO_CALIBRATION_OUT_c1minus1	5.57642e-07
RESULTS_SEARCH_3_PARAMETERS_MSMS_AUTO_CALIBRATION_OUT_c2	0
RESULTS_SEARCH_3_PARAMETERS_MSMS_AUTO_CALIBRATION_OUT_file	2
RESULTS_SEARCH_3_PARAMETERS_MSMS_AUTO_CALIBRATION_OUT_partnumber	2
RESULTS_SEARCH_3_PARAMETERS_MSMS_AUTO_CALIBRATION_OUT_polyorder	1
RESULTS_SEARCH_3_PARAMETERS_MSMS_AUTO_CALIBRATION_OUT_sample	1
RESULTS_SEARCH_3_PARAMETERS_MSMS_AUTO_CALIBRATION_OUT_squareroot	TRUE
RESULTS_SEARCH_3_PARAMETERS_MAX_PRECURSORS_FRAGLET	1900-01-05
RESULTS_SEARCH_3_PARAMETERS_MAX_PRECURSORS_TAGLET	1
RESULTS_SEARCH_3_PARAMETERS_PRECURSORS_DR_FRAGLET	10
RESULTS_SEARCH_3_PARAMETERS_PRECURSORS_DR_TAGLET	3
RESULTS_SEARCH_3_PARAMETERS_DEFAULT_CHARGE_STATE_1_charge	2
RESULTS_SEARCH_3_PARAMETERS_DEFAULT_CHARGE_STATE_1_probability	1
RESULTS_SEARCH_3_PARAMETERS_DEFAULT_CHARGE_STATE_2_charge	3
RESULTS_SEARCH_3_PARAMETERS_DEFAULT_CHARGE_STATE_2_probability	1
RESULTS_SEARCH_3_PARAMETERS_DEFAULT_CHARGE_STATE_3_charge	4
RESULTS_SEARCH_3_PARAMETERS_DEFAULT_CHARGE_STATE_3_probability	1
RESULTS_SEARCH_3_PARAMETERS_VERSION	5.0.1.0, 4895
RESULTS_SEARCH_3_PARAMETERS_PARAGON_VERSION	5.0.1.0, 4874
RESULTS_SEARCH_3_PARAMETERS_APPLICATION	ProteinPilot(tm) Software
RESULTS_SEARCH_3_PARAMETERS_PROGROUP_alternativedispositionmaximumfoldprobabilitydrop	100
RESULTS_SEARCH_3_PARAMETERS_PROGROUP_alternativedispositionmaximumfoldscoredrop	2
RESULTS_SEARCH_3_PARAMETERS_PROGROUP_autodiscordantpeptidethreshold	0.3
RESULTS_SEARCH_3_PARAMETERS_PROGROUP_bayesconfidencecalclulation	TRUE
RESULTS_SEARCH_3_PARAMETERS_PROGROUP_calibrateconfidence	TRUE
RESULTS_SEARCH_3_PARAMETERS_PROGROUP_compresspeptides	FALSE
RESULTS_SEARCH_3_PARAMETERS_PROGROUP_confidencepercentthresholdforexcludingothersfromquant	15
RESULTS_SEARCH_3_PARAMETERS_PROGROUP_confidencepercentthresholdforincludingselfinquant	15
RESULTS_SEARCH_3_PARAMETERS_PROGROUP_donotstoremspeaklists	FALSE
RESULTS_SEARCH_3_PARAMETERS_PROGROUP_fasta	C:\AB SCIEX\ProteinPilot Data\SearchDatabases\uniprot-zebrafish_with_Clover.fasta
RESULTS_SEARCH_3_PARAMETERS_PROGROUP_featuregroupminpepconf	0.66
RESULTS_SEARCH_3_PARAMETERS_PROGROUP_featuregroupminups	0.47
RESULTS_SEARCH_3_PARAMETERS_PROGROUP_focusingintersection	4
RESULTS_SEARCH_3_PARAMETERS_PROGROUP_focusingminimummatchconfidence	0.1
RESULTS_SEARCH_3_PARAMETERS_PROGROUP_focusingminunusedprotscore	0.1
RESULTS_SEARCH_3_PARAMETERS_PROGROUP_focusingsubsetcutoff	6
RESULTS_SEARCH_3_PARAMETERS_PROGROUP_intersection	1.3
RESULTS_SEARCH_3_PARAMETERS_PROGROUP_minimummatchconfidencecutoff	0.001
RESULTS_SEARCH_3_PARAMETERS_PROGROUP_minunusedprotscore	0.0458
RESULTS_SEARCH_3_PARAMETERS_PROGROUP_subsetcutoff	2
RESULTS_SEARCH_3_PARAMETERS_PROGROUP_unusedprotscorethresholdforexcludingothersfromquant	1900-01-01 07:12:00
RESULTS_SEARCH_3_PARAMETERS_PEAKLIST_count	3629
RESULTS_SEARCH_3_PARAMETERS_PEAKLIST_filenumber	2
RESULTS_SEARCH_3_PARAMETERS_PEAKLIST_original_count	3629
RESULTS_SEARCH_3_PARAMETERS_PEAKLIST_originalfilename	C:\AB SCIEX\ProteinPilot Data\Results\Albert\ZX 20200624 6600\ZX 20200624 C4A 2.wiff
RESULTS_SEARCH_3_PARAMETERS_PEAKLIST_partnumber	2
RESULTS_SEARCH_3_PARAMETERS_QUANT_TYPE_background_correction	FALSE
RESULTS_SEARCH_3_PARAMETERS_QUANT_TYPE_bias_correction	TRUE
RESULTS_SEARCH_3_PARAMETERS_QUANT_TYPE_keep_extreme_peptides_over_fraction	0
RESULTS_SEARCH_3_PARAMETERS_QUANT_TYPE_low_confidence_check	TRUE
RESULTS_SEARCH_3_PARAMETERS_QUANT_TYPE_low_intensity_check	TRUE
RESULTS_SEARCH_3_PARAMETERS_QUANT_TYPE_median_statistic	TRUE
RESULTS_SEARCH_3_PARAMETERS_QUANT_TYPE_mod_check	TRUE
RESULTS_SEARCH_3_PARAMETERS_QUANT_TYPE_quant_threshold	-1
RESULTS_SEARCH_3_PARAMETERS_QUANT_TYPE_quant_threshold_sn	9
RESULTS_SEARCH_3_PARAMETERS_QUANT_TYPE_separate_searches	FALSE
RESULTS_SEARCH_3_PARAMETERS_QUANT_TYPE_shared_msms_check	TRUE
RESULTS_SEARCH_3_PARAMETERS_PARAGON_METHOD_SETTINGS_UI_SAMPLE_TYPE	Identification
RESULTS_SEARCH_3_PARAMETERS_PARAGON_METHOD_SETTINGS_UI_CYS_ALKYLATION	Iodoacetamide w other Cys mods possible
RESULTS_SEARCH_3_PARAMETERS_PARAGON_METHOD_SETTINGS_UI_DIGESTION	Trypsin + Lys C
RESULTS_SEARCH_3_PARAMETERS_PARAGON_METHOD_SETTINGS_UI_SPECIAL_FACTOR	Gel-based ID
RESULTS_SEARCH_3_PARAMETERS_PARAGON_METHOD_SETTINGS_UI_INSTRUMENT	TripleTOF 6600
RESULTS_SEARCH_3_PARAMETERS_PARAGON_METHOD_SETTINGS_UI_SEARCH_EFFORT	Thorough
RESULTS_SEARCH_3_PARAMETERS_PARAGON_METHOD_SETTINGS_UI_USER_NAME	IMB-MASS02\massuser
RESULTS_SEARCH_3_PARAMETERS_PARAGON_METHOD_SETTINGS_UI_MACHINE_NAME	IMB-MASS02
RESULTS_SEARCH_3_PARAMETERS_PARAGON_METHOD_SETTINGS_UI_SEARCH_ID	6.37467e+17
RESULTS_SEARCH_3_PARAMETERS_PARAGON_METHOD_SETTINGS_UI_START_TIME	2021-01-19 16:08:23
RESULTS_SEARCH_3_PARAMETERS_PARAGON_METHOD_SETTINGS_UI_MIN_UNUSED_PROTSCORE	0.0458
RESULTS_SEARCH_3_PARAMETERS_PARAGON_METHOD_SETTINGS_UI_PSPEP	TRUE
RESULTS_SEARCH_4_time_cpu	247698
RESULTS_SEARCH_4_time_duration	287285
RESULTS_SEARCH_4_version	5.0.1.4874
RESULTS_SEARCH_4_xml:id	SEARCH:2:637466692955257639_1
RESULTS_SEARCH_4_PARAMETERS_chemical_data_edited	FALSE
RESULTS_SEARCH_4_PARAMETERS_do_multiprecursor_search	TRUE
RESULTS_SEARCH_4_PARAMETERS_do_reverse_search	TRUE
RESULTS_SEARCH_4_PARAMETERS_max_quant_labels	35
RESULTS_SEARCH_4_PARAMETERS_maxresults	15
RESULTS_SEARCH_4_PARAMETERS_separate_searches	FALSE
RESULTS_SEARCH_4_PARAMETERS_MSTOLERANCE_type	dalton
RESULTS_SEARCH_4_PARAMETERS_MSTOLERANCE_value	0.05
RESULTS_SEARCH_4_PARAMETERS_MSMSTOLERANCE_type	dalton
RESULTS_SEARCH_4_PARAMETERS_MSMSTOLERANCE_value	0.1
RESULTS_SEARCH_4_PARAMETERS_MS_STANDARD_DEVIATION_type	dalton
RESULTS_SEARCH_4_PARAMETERS_MS_STANDARD_DEVIATION_value	0.0011
RESULTS_SEARCH_4_PARAMETERS_MSMS_STANDARD_DEVIATION_type	dalton
RESULTS_SEARCH_4_PARAMETERS_MSMS_STANDARD_DEVIATION_value	0.01
RESULTS_SEARCH_4_PARAMETERS_FASTA_filename	C:\AB SCIEX\ProteinPilot Data\SearchDatabases\uniprot-zebrafish_with_Clover.fasta
RESULTS_SEARCH_4_PARAMETERS_AUTO_CALIBRATION_ms	TRUE
RESULTS_SEARCH_4_PARAMETERS_AUTO_CALIBRATION_msexport	FALSE
RESULTS_SEARCH_4_PARAMETERS_AUTO_CALIBRATION_msms	TRUE
RESULTS_SEARCH_4_PARAMETERS_AUTO_CALIBRATION_msmstolsdratio	2.75
RESULTS_SEARCH_4_PARAMETERS_AUTO_CALIBRATION_mstolsdratio	7
RESULTS_SEARCH_4_PARAMETERS_AUTO_CALIBRATION_squareroot	TRUE
RESULTS_SEARCH_4_PARAMETERS_AUTO_CALIBRATION_type	dalton
RESULTS_SEARCH_4_PARAMETERS_AUTO_CALIBRATION_MCP_d_s_s_f	0.0666667
RESULTS_SEARCH_4_PARAMETERS_AUTO_CALIBRATION_MCP_d_s_w_f	3
RESULTS_SEARCH_4_PARAMETERS_AUTO_CALIBRATION_MCP_m_f_r_mbc	200
RESULTS_SEARCH_4_PARAMETERS_AUTO_CALIBRATION_MCP_m_m_c	10
RESULTS_SEARCH_4_PARAMETERS_AUTO_CALIBRATION_MCP_m_m_f_s	0.25
RESULTS_SEARCH_4_PARAMETERS_AUTO_CALIBRATION_MCP_m_m_p_f	0.33
RESULTS_SEARCH_4_PARAMETERS_AUTO_CALIBRATION_MCP_m_m_p_rms_f	1
RESULTS_SEARCH_4_PARAMETERS_AUTO_CALIBRATION_MCP_m_p_t_f	1
RESULTS_SEARCH_4_PARAMETERS_AUTO_CALIBRATION_MCP_m_r_h_n_b	15
RESULTS_SEARCH_4_PARAMETERS_AUTO_CALIBRATION_MCP_m_z_n_s	99
RESULTS_SEARCH_4_PARAMETERS_AUTO_CALIBRATION_MCP_m_z_s_mn_f_r	0.0666667
RESULTS_SEARCH_4_PARAMETERS_AUTO_CALIBRATION_MCP_m_z_s_mx_f_r	0.1
RESULTS_SEARCH_4_PARAMETERS_MS_AUTO_CALIBRATION_OUT_avres	9.64322e-08
RESULTS_SEARCH_4_PARAMETERS_MS_AUTO_CALIBRATION_OUT_c0	0.000161648
RESULTS_SEARCH_4_PARAMETERS_MS_AUTO_CALIBRATION_OUT_c1minus1	-6.71565e-06
RESULTS_SEARCH_4_PARAMETERS_MS_AUTO_CALIBRATION_OUT_c2	0
RESULTS_SEARCH_4_PARAMETERS_MS_AUTO_CALIBRATION_OUT_file	2
RESULTS_SEARCH_4_PARAMETERS_MS_AUTO_CALIBRATION_OUT_partnumber	2
RESULTS_SEARCH_4_PARAMETERS_MS_AUTO_CALIBRATION_OUT_polyorder	1
RESULTS_SEARCH_4_PARAMETERS_MS_AUTO_CALIBRATION_OUT_sample	1
RESULTS_SEARCH_4_PARAMETERS_MS_AUTO_CALIBRATION_OUT_squareroot	TRUE
RESULTS_SEARCH_4_PARAMETERS_MSMS_AUTO_CALIBRATION_OUT_avres	1.96508e-08
RESULTS_SEARCH_4_PARAMETERS_MSMS_AUTO_CALIBRATION_OUT_c0	-1.26721e-05
RESULTS_SEARCH_4_PARAMETERS_MSMS_AUTO_CALIBRATION_OUT_c1minus1	5.57642e-07
RESULTS_SEARCH_4_PARAMETERS_MSMS_AUTO_CALIBRATION_OUT_c2	0
RESULTS_SEARCH_4_PARAMETERS_MSMS_AUTO_CALIBRATION_OUT_file	2
RESULTS_SEARCH_4_PARAMETERS_MSMS_AUTO_CALIBRATION_OUT_partnumber	2
RESULTS_SEARCH_4_PARAMETERS_MSMS_AUTO_CALIBRATION_OUT_polyorder	1
RESULTS_SEARCH_4_PARAMETERS_MSMS_AUTO_CALIBRATION_OUT_sample	1
RESULTS_SEARCH_4_PARAMETERS_MSMS_AUTO_CALIBRATION_OUT_squareroot	TRUE
RESULTS_SEARCH_4_PARAMETERS_MAX_PRECURSORS_FRAGLET	5
RESULTS_SEARCH_4_PARAMETERS_MAX_PRECURSORS_TAGLET	1
RESULTS_SEARCH_4_PARAMETERS_PRECURSORS_DR_FRAGLET	10
RESULTS_SEARCH_4_PARAMETERS_PRECURSORS_DR_TAGLET	3
RESULTS_SEARCH_4_PARAMETERS_DEFAULT_CHARGE_STATE_1_charge	2
RESULTS_SEARCH_4_PARAMETERS_DEFAULT_CHARGE_STATE_1_probability	1
RESULTS_SEARCH_4_PARAMETERS_DEFAULT_CHARGE_STATE_2_charge	3
RESULTS_SEARCH_4_PARAMETERS_DEFAULT_CHARGE_STATE_2_probability	1
RESULTS_SEARCH_4_PARAMETERS_DEFAULT_CHARGE_STATE_3_charge	4
RESULTS_SEARCH_4_PARAMETERS_DEFAULT_CHARGE_STATE_3_probability	1
RESULTS_SEARCH_4_PARAMETERS_VERSION	5.0.1.0, 4895
RESULTS_SEARCH_4_PARAMETERS_PARAGON_VERSION	5.0.1.0, 4874
RESULTS_SEARCH_4_PARAMETERS_APPLICATION	ProteinPilot(tm) Software
RESULTS_SEARCH_4_PARAMETERS_PROGROUP_alternativedispositionmaximumfoldprobabilitydrop	100
RESULTS_SEARCH_4_PARAMETERS_PROGROUP_alternativedispositionmaximumfoldscoredrop	2
RESULTS_SEARCH_4_PARAMETERS_PROGROUP_autodiscordantpeptidethreshold	0.3
RESULTS_SEARCH_4_PARAMETERS_PROGROUP_bayesconfidencecalclulation	TRUE
RESULTS_SEARCH_4_PARAMETERS_PROGROUP_calibrateconfidence	TRUE
RESULTS_SEARCH_4_PARAMETERS_PROGROUP_compresspeptides	FALSE
RESULTS_SEARCH_4_PARAMETERS_PROGROUP_confidencepercentthresholdforexcludingothersfromquant	15
RESULTS_SEARCH_4_PARAMETERS_PROGROUP_confidencepercentthresholdforincludingselfinquant	15
RESULTS_SEARCH_4_PARAMETERS_PROGROUP_donotstoremspeaklists	FALSE
RESULTS_SEARCH_4_PARAMETERS_PROGROUP_fasta	C:\AB SCIEX\ProteinPilot Data\SearchDatabases\uniprot-zebrafish_with_Clover.fasta
RESULTS_SEARCH_4_PARAMETERS_PROGROUP_featuregroupminpepconf	0.66
RESULTS_SEARCH_4_PARAMETERS_PROGROUP_featuregroupminups	0.47
RESULTS_SEARCH_4_PARAMETERS_PROGROUP_focusingintersection	4
RESULTS_SEARCH_4_PARAMETERS_PROGROUP_focusingminimummatchconfidence	0.1
RESULTS_SEARCH_4_PARAMETERS_PROGROUP_focusingminunusedprotscore	0.1
RESULTS_SEARCH_4_PARAMETERS_PROGROUP_focusingsubsetcutoff	6
RESULTS_SEARCH_4_PARAMETERS_PROGROUP_intersection	1.3
RESULTS_SEARCH_4_PARAMETERS_PROGROUP_minimummatchconfidencecutoff	0.001
RESULTS_SEARCH_4_PARAMETERS_PROGROUP_minunusedprotscore	0.0458
RESULTS_SEARCH_4_PARAMETERS_PROGROUP_subsetcutoff	2
RESULTS_SEARCH_4_PARAMETERS_PROGROUP_unusedprotscorethresholdforexcludingothersfromquant	1.3
RESULTS_SEARCH_4_PARAMETERS_PEAKLIST_count	3629
RESULTS_SEARCH_4_PARAMETERS_PEAKLIST_filenumber	2
RESULTS_SEARCH_4_PARAMETERS_PEAKLIST_original_count	3629
RESULTS_SEARCH_4_PARAMETERS_PEAKLIST_originalfilename	C:\AB SCIEX\ProteinPilot Data\Results\Albert\ZX 20200624 6600\ZX 20200624 C4A 2.wiff
RESULTS_SEARCH_4_PARAMETERS_PEAKLIST_partnumber	2
RESULTS_SEARCH_4_PARAMETERS_QUANT_TYPE_background_correction	FALSE
RESULTS_SEARCH_4_PARAMETERS_QUANT_TYPE_bias_correction	TRUE
RESULTS_SEARCH_4_PARAMETERS_QUANT_TYPE_keep_extreme_peptides_over_fraction	0
RESULTS_SEARCH_4_PARAMETERS_QUANT_TYPE_low_confidence_check	TRUE
RESULTS_SEARCH_4_PARAMETERS_QUANT_TYPE_low_intensity_check	TRUE
RESULTS_SEARCH_4_PARAMETERS_QUANT_TYPE_median_statistic	TRUE
RESULTS_SEARCH_4_PARAMETERS_QUANT_TYPE_mod_check	TRUE
RESULTS_SEARCH_4_PARAMETERS_QUANT_TYPE_quant_threshold	-1
RESULTS_SEARCH_4_PARAMETERS_QUANT_TYPE_quant_threshold_sn	9
RESULTS_SEARCH_4_PARAMETERS_QUANT_TYPE_separate_searches	FALSE
RESULTS_SEARCH_4_PARAMETERS_QUANT_TYPE_shared_msms_check	TRUE
RESULTS_SEARCH_4_PARAMETERS_PARAGON_METHOD_SETTINGS_UI_SAMPLE_TYPE	Identification
RESULTS_SEARCH_4_PARAMETERS_PARAGON_METHOD_SETTINGS_UI_CYS_ALKYLATION	Iodoacetamide w other Cys mods possible
RESULTS_SEARCH_4_PARAMETERS_PARAGON_METHOD_SETTINGS_UI_DIGESTION	Trypsin + Lys C
RESULTS_SEARCH_4_PARAMETERS_PARAGON_METHOD_SETTINGS_UI_SPECIAL_FACTOR	Gel-based ID
RESULTS_SEARCH_4_PARAMETERS_PARAGON_METHOD_SETTINGS_UI_INSTRUMENT	TripleTOF 6600
RESULTS_SEARCH_4_PARAMETERS_PARAGON_METHOD_SETTINGS_UI_SEARCH_EFFORT	Thorough
RESULTS_SEARCH_4_PARAMETERS_PARAGON_METHOD_SETTINGS_UI_USER_NAME	IMB-MASS02\massuser
RESULTS_SEARCH_4_PARAMETERS_PARAGON_METHOD_SETTINGS_UI_MACHINE_NAME	IMB-MASS02
RESULTS_SEARCH_4_PARAMETERS_PARAGON_METHOD_SETTINGS_UI_SEARCH_ID	6.37467e+17
RESULTS_SEARCH_4_PARAMETERS_PARAGON_METHOD_SETTINGS_UI_START_TIME	2021-01-19 16:08:23
RESULTS_SEARCH_4_PARAMETERS_PARAGON_METHOD_SETTINGS_UI_MIN_UNUSED_PROTSCORE	0.0458
RESULTS_SEARCH_4_PARAMETERS_PARAGON_METHOD_SETTINGS_UI_PSPEP	TRUE
RESULTS_SEARCH_5_time_cpu	172739
RESULTS_SEARCH_5_time_duration	2473-03-15
RESULTS_SEARCH_5_version	5.0.1.4874
RESULTS_SEARCH_5_xml:id	SEARCH:1:637466692955257639_2
RESULTS_SEARCH_5_PARAMETERS_chemical_data_edited	FALSE
RESULTS_SEARCH_5_PARAMETERS_do_multiprecursor_search	TRUE
RESULTS_SEARCH_5_PARAMETERS_do_reverse_search	TRUE
RESULTS_SEARCH_5_PARAMETERS_max_quant_labels	35
RESULTS_SEARCH_5_PARAMETERS_maxresults	15
RESULTS_SEARCH_5_PARAMETERS_separate_searches	FALSE
RESULTS_SEARCH_5_PARAMETERS_MSTOLERANCE_type	dalton
RESULTS_SEARCH_5_PARAMETERS_MSTOLERANCE_value	0.05
RESULTS_SEARCH_5_PARAMETERS_MSMSTOLERANCE_type	dalton
RESULTS_SEARCH_5_PARAMETERS_MSMSTOLERANCE_value	0.1
RESULTS_SEARCH_5_PARAMETERS_MS_STANDARD_DEVIATION_type	dalton
RESULTS_SEARCH_5_PARAMETERS_MS_STANDARD_DEVIATION_value	0.0011
RESULTS_SEARCH_5_PARAMETERS_MSMS_STANDARD_DEVIATION_type	dalton
RESULTS_SEARCH_5_PARAMETERS_MSMS_STANDARD_DEVIATION_value	0.01
RESULTS_SEARCH_5_PARAMETERS_FASTA_filename	C:\AB SCIEX\ProteinPilot Data\SearchDatabases\uniprot-zebrafish_with_Clover.fasta
RESULTS_SEARCH_5_PARAMETERS_AUTO_CALIBRATION_ms	TRUE
RESULTS_SEARCH_5_PARAMETERS_AUTO_CALIBRATION_msexport	FALSE
RESULTS_SEARCH_5_PARAMETERS_AUTO_CALIBRATION_msms	TRUE
RESULTS_SEARCH_5_PARAMETERS_AUTO_CALIBRATION_msmstolsdratio	2.75
RESULTS_SEARCH_5_PARAMETERS_AUTO_CALIBRATION_mstolsdratio	7
RESULTS_SEARCH_5_PARAMETERS_AUTO_CALIBRATION_squareroot	TRUE
RESULTS_SEARCH_5_PARAMETERS_AUTO_CALIBRATION_type	dalton
RESULTS_SEARCH_5_PARAMETERS_AUTO_CALIBRATION_MCP_d_s_s_f	0.0666667
RESULTS_SEARCH_5_PARAMETERS_AUTO_CALIBRATION_MCP_d_s_w_f	3
RESULTS_SEARCH_5_PARAMETERS_AUTO_CALIBRATION_MCP_m_f_r_mbc	200
RESULTS_SEARCH_5_PARAMETERS_AUTO_CALIBRATION_MCP_m_m_c	10
RESULTS_SEARCH_5_PARAMETERS_AUTO_CALIBRATION_MCP_m_m_f_s	0.25
RESULTS_SEARCH_5_PARAMETERS_AUTO_CALIBRATION_MCP_m_m_p_f	0.33
RESULTS_SEARCH_5_PARAMETERS_AUTO_CALIBRATION_MCP_m_m_p_rms_f	1
RESULTS_SEARCH_5_PARAMETERS_AUTO_CALIBRATION_MCP_m_p_t_f	1
RESULTS_SEARCH_5_PARAMETERS_AUTO_CALIBRATION_MCP_m_r_h_n_b	15
RESULTS_SEARCH_5_PARAMETERS_AUTO_CALIBRATION_MCP_m_z_n_s	99
RESULTS_SEARCH_5_PARAMETERS_AUTO_CALIBRATION_MCP_m_z_s_mn_f_r	0.0666667
RESULTS_SEARCH_5_PARAMETERS_AUTO_CALIBRATION_MCP_m_z_s_mx_f_r	0.1
RESULTS_SEARCH_5_PARAMETERS_MS_AUTO_CALIBRATION_OUT_avres	-2.27974e-10
RESULTS_SEARCH_5_PARAMETERS_MS_AUTO_CALIBRATION_OUT_c0	0.000220998
RESULTS_SEARCH_5_PARAMETERS_MS_AUTO_CALIBRATION_OUT_c1minus1	-1.01619e-05
RESULTS_SEARCH_5_PARAMETERS_MS_AUTO_CALIBRATION_OUT_c2	0
RESULTS_SEARCH_5_PARAMETERS_MS_AUTO_CALIBRATION_OUT_file	3
RESULTS_SEARCH_5_PARAMETERS_MS_AUTO_CALIBRATION_OUT_partnumber	3
RESULTS_SEARCH_5_PARAMETERS_MS_AUTO_CALIBRATION_OUT_polyorder	1
RESULTS_SEARCH_5_PARAMETERS_MS_AUTO_CALIBRATION_OUT_sample	1
RESULTS_SEARCH_5_PARAMETERS_MS_AUTO_CALIBRATION_OUT_squareroot	TRUE
RESULTS_SEARCH_5_PARAMETERS_MSMS_AUTO_CALIBRATION_OUT_avres	-1.24918e-08
RESULTS_SEARCH_5_PARAMETERS_MSMS_AUTO_CALIBRATION_OUT_c0	-5.01156e-06
RESULTS_SEARCH_5_PARAMETERS_MSMS_AUTO_CALIBRATION_OUT_c1minus1	7.61501e-07
RESULTS_SEARCH_5_PARAMETERS_MSMS_AUTO_CALIBRATION_OUT_c2	0
RESULTS_SEARCH_5_PARAMETERS_MSMS_AUTO_CALIBRATION_OUT_file	3
RESULTS_SEARCH_5_PARAMETERS_MSMS_AUTO_CALIBRATION_OUT_partnumber	3
RESULTS_SEARCH_5_PARAMETERS_MSMS_AUTO_CALIBRATION_OUT_polyorder	1
RESULTS_SEARCH_5_PARAMETERS_MSMS_AUTO_CALIBRATION_OUT_sample	1
RESULTS_SEARCH_5_PARAMETERS_MSMS_AUTO_CALIBRATION_OUT_squareroot	TRUE
RESULTS_SEARCH_5_PARAMETERS_MAX_PRECURSORS_FRAGLET	5
RESULTS_SEARCH_5_PARAMETERS_MAX_PRECURSORS_TAGLET	1
RESULTS_SEARCH_5_PARAMETERS_PRECURSORS_DR_FRAGLET	10
RESULTS_SEARCH_5_PARAMETERS_PRECURSORS_DR_TAGLET	3
RESULTS_SEARCH_5_PARAMETERS_DEFAULT_CHARGE_STATE_1_charge	2
RESULTS_SEARCH_5_PARAMETERS_DEFAULT_CHARGE_STATE_1_probability	1
RESULTS_SEARCH_5_PARAMETERS_DEFAULT_CHARGE_STATE_2_charge	3
RESULTS_SEARCH_5_PARAMETERS_DEFAULT_CHARGE_STATE_2_probability	1
RESULTS_SEARCH_5_PARAMETERS_DEFAULT_CHARGE_STATE_3_charge	4
RESULTS_SEARCH_5_PARAMETERS_DEFAULT_CHARGE_STATE_3_probability	1
RESULTS_SEARCH_5_PARAMETERS_VERSION	5.0.1.0, 4895
RESULTS_SEARCH_5_PARAMETERS_PARAGON_VERSION	5.0.1.0, 4874
RESULTS_SEARCH_5_PARAMETERS_APPLICATION	ProteinPilot(tm) Software
RESULTS_SEARCH_5_PARAMETERS_PROGROUP_alternativedispositionmaximumfoldprobabilitydrop	100
RESULTS_SEARCH_5_PARAMETERS_PROGROUP_alternativedispositionmaximumfoldscoredrop	2
RESULTS_SEARCH_5_PARAMETERS_PROGROUP_autodiscordantpeptidethreshold	0.3
RESULTS_SEARCH_5_PARAMETERS_PROGROUP_bayesconfidencecalclulation	TRUE
RESULTS_SEARCH_5_PARAMETERS_PROGROUP_calibrateconfidence	TRUE
RESULTS_SEARCH_5_PARAMETERS_PROGROUP_compresspeptides	FALSE
RESULTS_SEARCH_5_PARAMETERS_PROGROUP_confidencepercentthresholdforexcludingothersfromquant	15
RESULTS_SEARCH_5_PARAMETERS_PROGROUP_confidencepercentthresholdforincludingselfinquant	15
RESULTS_SEARCH_5_PARAMETERS_PROGROUP_donotstoremspeaklists	FALSE
RESULTS_SEARCH_5_PARAMETERS_PROGROUP_fasta	C:\AB SCIEX\ProteinPilot Data\SearchDatabases\uniprot-zebrafish_with_Clover.fasta
RESULTS_SEARCH_5_PARAMETERS_PROGROUP_featuregroupminpepconf	0.66
RESULTS_SEARCH_5_PARAMETERS_PROGROUP_featuregroupminups	0.47
RESULTS_SEARCH_5_PARAMETERS_PROGROUP_focusingintersection	4
RESULTS_SEARCH_5_PARAMETERS_PROGROUP_focusingminimummatchconfidence	0.1
RESULTS_SEARCH_5_PARAMETERS_PROGROUP_focusingminunusedprotscore	0.1
RESULTS_SEARCH_5_PARAMETERS_PROGROUP_focusingsubsetcutoff	6
RESULTS_SEARCH_5_PARAMETERS_PROGROUP_intersection	1.3
RESULTS_SEARCH_5_PARAMETERS_PROGROUP_minimummatchconfidencecutoff	0.001
RESULTS_SEARCH_5_PARAMETERS_PROGROUP_minunusedprotscore	0.0458
RESULTS_SEARCH_5_PARAMETERS_PROGROUP_subsetcutoff	2
RESULTS_SEARCH_5_PARAMETERS_PROGROUP_unusedprotscorethresholdforexcludingothersfromquant	1.3
RESULTS_SEARCH_5_PARAMETERS_PEAKLIST_count	3741
RESULTS_SEARCH_5_PARAMETERS_PEAKLIST_filenumber	3
RESULTS_SEARCH_5_PARAMETERS_PEAKLIST_original_count	3741
RESULTS_SEARCH_5_PARAMETERS_PEAKLIST_originalfilename	C:\AB SCIEX\ProteinPilot Data\Results\Albert\ZX 20200624 6600\ZX 20200624 C4A 3.wiff
RESULTS_SEARCH_5_PARAMETERS_PEAKLIST_partnumber	3
RESULTS_SEARCH_5_PARAMETERS_QUANT_TYPE_background_correction	FALSE
RESULTS_SEARCH_5_PARAMETERS_QUANT_TYPE_bias_correction	TRUE
RESULTS_SEARCH_5_PARAMETERS_QUANT_TYPE_keep_extreme_peptides_over_fraction	0
RESULTS_SEARCH_5_PARAMETERS_QUANT_TYPE_low_confidence_check	TRUE
RESULTS_SEARCH_5_PARAMETERS_QUANT_TYPE_low_intensity_check	TRUE
RESULTS_SEARCH_5_PARAMETERS_QUANT_TYPE_median_statistic	TRUE
RESULTS_SEARCH_5_PARAMETERS_QUANT_TYPE_mod_check	TRUE
RESULTS_SEARCH_5_PARAMETERS_QUANT_TYPE_quant_threshold	-1
RESULTS_SEARCH_5_PARAMETERS_QUANT_TYPE_quant_threshold_sn	9
RESULTS_SEARCH_5_PARAMETERS_QUANT_TYPE_separate_searches	FALSE
RESULTS_SEARCH_5_PARAMETERS_QUANT_TYPE_shared_msms_check	TRUE
RESULTS_SEARCH_5_PARAMETERS_PARAGON_METHOD_SETTINGS_UI_SAMPLE_TYPE	Identification
RESULTS_SEARCH_5_PARAMETERS_PARAGON_METHOD_SETTINGS_UI_CYS_ALKYLATION	Iodoacetamide w other Cys mods possible
RESULTS_SEARCH_5_PARAMETERS_PARAGON_METHOD_SETTINGS_UI_DIGESTION	Trypsin + Lys C
RESULTS_SEARCH_5_PARAMETERS_PARAGON_METHOD_SETTINGS_UI_SPECIAL_FACTOR	Gel-based ID
RESULTS_SEARCH_5_PARAMETERS_PARAGON_METHOD_SETTINGS_UI_INSTRUMENT	TripleTOF 6600
RESULTS_SEARCH_5_PARAMETERS_PARAGON_METHOD_SETTINGS_UI_SEARCH_EFFORT	Thorough
RESULTS_SEARCH_5_PARAMETERS_PARAGON_METHOD_SETTINGS_UI_USER_NAME	IMB-MASS02\massuser
RESULTS_SEARCH_5_PARAMETERS_PARAGON_METHOD_SETTINGS_UI_MACHINE_NAME	IMB-MASS02
RESULTS_SEARCH_5_PARAMETERS_PARAGON_METHOD_SETTINGS_UI_SEARCH_ID	6.37467e+17
RESULTS_SEARCH_5_PARAMETERS_PARAGON_METHOD_SETTINGS_UI_START_TIME	2021-01-19 16:08:23
RESULTS_SEARCH_5_PARAMETERS_PARAGON_METHOD_SETTINGS_UI_MIN_UNUSED_PROTSCORE	0.0458
RESULTS_SEARCH_5_PARAMETERS_PARAGON_METHOD_SETTINGS_UI_PSPEP	TRUE
RESULTS_SEARCH_6_time_cpu	204673
RESULTS_SEARCH_6_time_duration	232901
RESULTS_SEARCH_6_version	5.0.1.4874
RESULTS_SEARCH_6_xml:id	SEARCH:2:637466692955257639_2
RESULTS_SEARCH_6_PARAMETERS_chemical_data_edited	FALSE
RESULTS_SEARCH_6_PARAMETERS_do_multiprecursor_search	TRUE
RESULTS_SEARCH_6_PARAMETERS_do_reverse_search	TRUE
RESULTS_SEARCH_6_PARAMETERS_max_quant_labels	35
RESULTS_SEARCH_6_PARAMETERS_maxresults	15
RESULTS_SEARCH_6_PARAMETERS_separate_searches	FALSE
RESULTS_SEARCH_6_PARAMETERS_MSTOLERANCE_type	dalton
RESULTS_SEARCH_6_PARAMETERS_MSTOLERANCE_value	0.05
RESULTS_SEARCH_6_PARAMETERS_MSMSTOLERANCE_type	dalton
RESULTS_SEARCH_6_PARAMETERS_MSMSTOLERANCE_value	0.1
RESULTS_SEARCH_6_PARAMETERS_MS_STANDARD_DEVIATION_type	dalton
RESULTS_SEARCH_6_PARAMETERS_MS_STANDARD_DEVIATION_value	0.0011
RESULTS_SEARCH_6_PARAMETERS_MSMS_STANDARD_DEVIATION_type	dalton
RESULTS_SEARCH_6_PARAMETERS_MSMS_STANDARD_DEVIATION_value	0.01
RESULTS_SEARCH_6_PARAMETERS_FASTA_filename	C:\AB SCIEX\ProteinPilot Data\SearchDatabases\uniprot-zebrafish_with_Clover.fasta
RESULTS_SEARCH_6_PARAMETERS_AUTO_CALIBRATION_ms	TRUE
RESULTS_SEARCH_6_PARAMETERS_AUTO_CALIBRATION_msexport	FALSE
RESULTS_SEARCH_6_PARAMETERS_AUTO_CALIBRATION_msms	TRUE
RESULTS_SEARCH_6_PARAMETERS_AUTO_CALIBRATION_msmstolsdratio	2.75
RESULTS_SEARCH_6_PARAMETERS_AUTO_CALIBRATION_mstolsdratio	7
RESULTS_SEARCH_6_PARAMETERS_AUTO_CALIBRATION_squareroot	TRUE
RESULTS_SEARCH_6_PARAMETERS_AUTO_CALIBRATION_type	dalton
RESULTS_SEARCH_6_PARAMETERS_AUTO_CALIBRATION_MCP_d_s_s_f	0.0666667
RESULTS_SEARCH_6_PARAMETERS_AUTO_CALIBRATION_MCP_d_s_w_f	3
RESULTS_SEARCH_6_PARAMETERS_AUTO_CALIBRATION_MCP_m_f_r_mbc	200
RESULTS_SEARCH_6_PARAMETERS_AUTO_CALIBRATION_MCP_m_m_c	10
RESULTS_SEARCH_6_PARAMETERS_AUTO_CALIBRATION_MCP_m_m_f_s	0.25
RESULTS_SEARCH_6_PARAMETERS_AUTO_CALIBRATION_MCP_m_m_p_f	0.33
RESULTS_SEARCH_6_PARAMETERS_AUTO_CALIBRATION_MCP_m_m_p_rms_f	1
RESULTS_SEARCH_6_PARAMETERS_AUTO_CALIBRATION_MCP_m_p_t_f	1
RESULTS_SEARCH_6_PARAMETERS_AUTO_CALIBRATION_MCP_m_r_h_n_b	15
RESULTS_SEARCH_6_PARAMETERS_AUTO_CALIBRATION_MCP_m_z_n_s	99
RESULTS_SEARCH_6_PARAMETERS_AUTO_CALIBRATION_MCP_m_z_s_mn_f_r	0.0666667
RESULTS_SEARCH_6_PARAMETERS_AUTO_CALIBRATION_MCP_m_z_s_mx_f_r	0.1
RESULTS_SEARCH_6_PARAMETERS_MS_AUTO_CALIBRATION_OUT_avres	-2.27974e-10
RESULTS_SEARCH_6_PARAMETERS_MS_AUTO_CALIBRATION_OUT_c0	0.000220998
RESULTS_SEARCH_6_PARAMETERS_MS_AUTO_CALIBRATION_OUT_c1minus1	-1.01619e-05
RESULTS_SEARCH_6_PARAMETERS_MS_AUTO_CALIBRATION_OUT_c2	0
RESULTS_SEARCH_6_PARAMETERS_MS_AUTO_CALIBRATION_OUT_file	3
RESULTS_SEARCH_6_PARAMETERS_MS_AUTO_CALIBRATION_OUT_partnumber	3
RESULTS_SEARCH_6_PARAMETERS_MS_AUTO_CALIBRATION_OUT_polyorder	1
RESULTS_SEARCH_6_PARAMETERS_MS_AUTO_CALIBRATION_OUT_sample	1
RESULTS_SEARCH_6_PARAMETERS_MS_AUTO_CALIBRATION_OUT_squareroot	TRUE
RESULTS_SEARCH_6_PARAMETERS_MSMS_AUTO_CALIBRATION_OUT_avres	-1.24918e-08
RESULTS_SEARCH_6_PARAMETERS_MSMS_AUTO_CALIBRATION_OUT_c0	-5.01156e-06
RESULTS_SEARCH_6_PARAMETERS_MSMS_AUTO_CALIBRATION_OUT_c1minus1	7.61501e-07
RESULTS_SEARCH_6_PARAMETERS_MSMS_AUTO_CALIBRATION_OUT_c2	0
RESULTS_SEARCH_6_PARAMETERS_MSMS_AUTO_CALIBRATION_OUT_file	3
RESULTS_SEARCH_6_PARAMETERS_MSMS_AUTO_CALIBRATION_OUT_partnumber	3
RESULTS_SEARCH_6_PARAMETERS_MSMS_AUTO_CALIBRATION_OUT_polyorder	1
RESULTS_SEARCH_6_PARAMETERS_MSMS_AUTO_CALIBRATION_OUT_sample	1
RESULTS_SEARCH_6_PARAMETERS_MSMS_AUTO_CALIBRATION_OUT_squareroot	TRUE
RESULTS_SEARCH_6_PARAMETERS_MAX_PRECURSORS_FRAGLET	5
RESULTS_SEARCH_6_PARAMETERS_MAX_PRECURSORS_TAGLET	1
RESULTS_SEARCH_6_PARAMETERS_PRECURSORS_DR_FRAGLET	10
RESULTS_SEARCH_6_PARAMETERS_PRECURSORS_DR_TAGLET	3
RESULTS_SEARCH_6_PARAMETERS_DEFAULT_CHARGE_STATE_1_charge	2
RESULTS_SEARCH_6_PARAMETERS_DEFAULT_CHARGE_STATE_1_probability	1
RESULTS_SEARCH_6_PARAMETERS_DEFAULT_CHARGE_STATE_2_charge	3
RESULTS_SEARCH_6_PARAMETERS_DEFAULT_CHARGE_STATE_2_probability	1900-01-01
RESULTS_SEARCH_6_PARAMETERS_DEFAULT_CHARGE_STATE_3_charge	4
RESULTS_SEARCH_6_PARAMETERS_DEFAULT_CHARGE_STATE_3_probability	1
RESULTS_SEARCH_6_PARAMETERS_VERSION	5.0.1.0, 4895
RESULTS_SEARCH_6_PARAMETERS_PARAGON_VERSION	5.0.1.0, 4874
RESULTS_SEARCH_6_PARAMETERS_APPLICATION	ProteinPilot(tm) Software
RESULTS_SEARCH_6_PARAMETERS_PROGROUP_alternativedispositionmaximumfoldprobabilitydrop	100
RESULTS_SEARCH_6_PARAMETERS_PROGROUP_alternativedispositionmaximumfoldscoredrop	2
RESULTS_SEARCH_6_PARAMETERS_PROGROUP_autodiscordantpeptidethreshold	0.3
RESULTS_SEARCH_6_PARAMETERS_PROGROUP_bayesconfidencecalclulation	TRUE
RESULTS_SEARCH_6_PARAMETERS_PROGROUP_calibrateconfidence	TRUE
RESULTS_SEARCH_6_PARAMETERS_PROGROUP_compresspeptides	FALSE
RESULTS_SEARCH_6_PARAMETERS_PROGROUP_confidencepercentthresholdforexcludingothersfromquant	15
RESULTS_SEARCH_6_PARAMETERS_PROGROUP_confidencepercentthresholdforincludingselfinquant	15
RESULTS_SEARCH_6_PARAMETERS_PROGROUP_donotstoremspeaklists	FALSE
RESULTS_SEARCH_6_PARAMETERS_PROGROUP_fasta	C:\AB SCIEX\ProteinPilot Data\SearchDatabases\uniprot-zebrafish_with_Clover.fasta
RESULTS_SEARCH_6_PARAMETERS_PROGROUP_featuregroupminpepconf	0.66
RESULTS_SEARCH_6_PARAMETERS_PROGROUP_featuregroupminups	0.47
RESULTS_SEARCH_6_PARAMETERS_PROGROUP_focusingintersection	4
RESULTS_SEARCH_6_PARAMETERS_PROGROUP_focusingminimummatchconfidence	0.1
RESULTS_SEARCH_6_PARAMETERS_PROGROUP_focusingminunusedprotscore	0.1
RESULTS_SEARCH_6_PARAMETERS_PROGROUP_focusingsubsetcutoff	6
RESULTS_SEARCH_6_PARAMETERS_PROGROUP_intersection	1.3
RESULTS_SEARCH_6_PARAMETERS_PROGROUP_minimummatchconfidencecutoff	0.001
RESULTS_SEARCH_6_PARAMETERS_PROGROUP_minunusedprotscore	0.0458
RESULTS_SEARCH_6_PARAMETERS_PROGROUP_subsetcutoff	2
RESULTS_SEARCH_6_PARAMETERS_PROGROUP_unusedprotscorethresholdforexcludingothersfromquant	1.3
RESULTS_SEARCH_6_PARAMETERS_PEAKLIST_count	3741
RESULTS_SEARCH_6_PARAMETERS_PEAKLIST_filenumber	3
RESULTS_SEARCH_6_PARAMETERS_PEAKLIST_original_count	3741
RESULTS_SEARCH_6_PARAMETERS_PEAKLIST_originalfilename	C:\AB SCIEX\ProteinPilot Data\Results\Albert\ZX 20200624 6600\ZX 20200624 C4A 3.wiff
RESULTS_SEARCH_6_PARAMETERS_PEAKLIST_partnumber	3
RESULTS_SEARCH_6_PARAMETERS_QUANT_TYPE_background_correction	FALSE
RESULTS_SEARCH_6_PARAMETERS_QUANT_TYPE_bias_correction	TRUE
RESULTS_SEARCH_6_PARAMETERS_QUANT_TYPE_keep_extreme_peptides_over_fraction	0
RESULTS_SEARCH_6_PARAMETERS_QUANT_TYPE_low_confidence_check	TRUE
RESULTS_SEARCH_6_PARAMETERS_QUANT_TYPE_low_intensity_check	TRUE
RESULTS_SEARCH_6_PARAMETERS_QUANT_TYPE_median_statistic	TRUE
RESULTS_SEARCH_6_PARAMETERS_QUANT_TYPE_mod_check	TRUE
RESULTS_SEARCH_6_PARAMETERS_QUANT_TYPE_quant_threshold	-1
RESULTS_SEARCH_6_PARAMETERS_QUANT_TYPE_quant_threshold_sn	9
RESULTS_SEARCH_6_PARAMETERS_QUANT_TYPE_separate_searches	FALSE
RESULTS_SEARCH_6_PARAMETERS_QUANT_TYPE_shared_msms_check	TRUE
RESULTS_SEARCH_6_PARAMETERS_PARAGON_METHOD_SETTINGS_UI_SAMPLE_TYPE	Identification
RESULTS_SEARCH_6_PARAMETERS_PARAGON_METHOD_SETTINGS_UI_CYS_ALKYLATION	Iodoacetamide w other Cys mods possible
RESULTS_SEARCH_6_PARAMETERS_PARAGON_METHOD_SETTINGS_UI_DIGESTION	Trypsin + Lys C
RESULTS_SEARCH_6_PARAMETERS_PARAGON_METHOD_SETTINGS_UI_SPECIAL_FACTOR	Gel-based ID
RESULTS_SEARCH_6_PARAMETERS_PARAGON_METHOD_SETTINGS_UI_INSTRUMENT	TripleTOF 6600
RESULTS_SEARCH_6_PARAMETERS_PARAGON_METHOD_SETTINGS_UI_SEARCH_EFFORT	Thorough
RESULTS_SEARCH_6_PARAMETERS_PARAGON_METHOD_SETTINGS_UI_USER_NAME	IMB-MASS02\massuser
RESULTS_SEARCH_6_PARAMETERS_PARAGON_METHOD_SETTINGS_UI_MACHINE_NAME	IMB-MASS02
RESULTS_SEARCH_6_PARAMETERS_PARAGON_METHOD_SETTINGS_UI_SEARCH_ID	6.37467e+17
RESULTS_SEARCH_6_PARAMETERS_PARAGON_METHOD_SETTINGS_UI_START_TIME	2021-01-19 16:08:23
RESULTS_SEARCH_6_PARAMETERS_PARAGON_METHOD_SETTINGS_UI_MIN_UNUSED_PROTSCORE	0.0458
RESULTS_SEARCH_6_PARAMETERS_PARAGON_METHOD_SETTINGS_UI_PSPEP	TRUE
RESULTS_SEARCH_7_time_cpu	268742
RESULTS_SEARCH_7_time_duration	310966
RESULTS_SEARCH_7_version	5.0.1.4874
RESULTS_SEARCH_7_xml:id	SEARCH:1:637466692955257639_3
RESULTS_SEARCH_7_PARAMETERS_chemical_data_edited	FALSE
RESULTS_SEARCH_7_PARAMETERS_do_multiprecursor_search	TRUE
RESULTS_SEARCH_7_PARAMETERS_do_reverse_search	TRUE
RESULTS_SEARCH_7_PARAMETERS_max_quant_labels	35
RESULTS_SEARCH_7_PARAMETERS_maxresults	15
RESULTS_SEARCH_7_PARAMETERS_separate_searches	FALSE
RESULTS_SEARCH_7_PARAMETERS_MSTOLERANCE_type	dalton
RESULTS_SEARCH_7_PARAMETERS_MSTOLERANCE_value	0.05
RESULTS_SEARCH_7_PARAMETERS_MSMSTOLERANCE_type	dalton
RESULTS_SEARCH_7_PARAMETERS_MSMSTOLERANCE_value	0.1
RESULTS_SEARCH_7_PARAMETERS_MS_STANDARD_DEVIATION_type	dalton
RESULTS_SEARCH_7_PARAMETERS_MS_STANDARD_DEVIATION_value	0.0011
RESULTS_SEARCH_7_PARAMETERS_MSMS_STANDARD_DEVIATION_type	dalton
RESULTS_SEARCH_7_PARAMETERS_MSMS_STANDARD_DEVIATION_value	0.01
RESULTS_SEARCH_7_PARAMETERS_FASTA_filename	C:\AB SCIEX\ProteinPilot Data\SearchDatabases\uniprot-zebrafish_with_Clover.fasta
RESULTS_SEARCH_7_PARAMETERS_AUTO_CALIBRATION_ms	TRUE
RESULTS_SEARCH_7_PARAMETERS_AUTO_CALIBRATION_msexport	FALSE
RESULTS_SEARCH_7_PARAMETERS_AUTO_CALIBRATION_msms	TRUE
RESULTS_SEARCH_7_PARAMETERS_AUTO_CALIBRATION_msmstolsdratio	2.75
RESULTS_SEARCH_7_PARAMETERS_AUTO_CALIBRATION_mstolsdratio	7
RESULTS_SEARCH_7_PARAMETERS_AUTO_CALIBRATION_squareroot	TRUE
RESULTS_SEARCH_7_PARAMETERS_AUTO_CALIBRATION_type	dalton
RESULTS_SEARCH_7_PARAMETERS_AUTO_CALIBRATION_MCP_d_s_s_f	0.0666667
RESULTS_SEARCH_7_PARAMETERS_AUTO_CALIBRATION_MCP_d_s_w_f	3
RESULTS_SEARCH_7_PARAMETERS_AUTO_CALIBRATION_MCP_m_f_r_mbc	200
RESULTS_SEARCH_7_PARAMETERS_AUTO_CALIBRATION_MCP_m_m_c	10
RESULTS_SEARCH_7_PARAMETERS_AUTO_CALIBRATION_MCP_m_m_f_s	0.25
RESULTS_SEARCH_7_PARAMETERS_AUTO_CALIBRATION_MCP_m_m_p_f	0.33
RESULTS_SEARCH_7_PARAMETERS_AUTO_CALIBRATION_MCP_m_m_p_rms_f	1
RESULTS_SEARCH_7_PARAMETERS_AUTO_CALIBRATION_MCP_m_p_t_f	1
RESULTS_SEARCH_7_PARAMETERS_AUTO_CALIBRATION_MCP_m_r_h_n_b	15
RESULTS_SEARCH_7_PARAMETERS_AUTO_CALIBRATION_MCP_m_z_n_s	99
RESULTS_SEARCH_7_PARAMETERS_AUTO_CALIBRATION_MCP_m_z_s_mn_f_r	0.0666667
RESULTS_SEARCH_7_PARAMETERS_AUTO_CALIBRATION_MCP_m_z_s_mx_f_r	0.1
RESULTS_SEARCH_7_PARAMETERS_MS_AUTO_CALIBRATION_OUT_avres	-2.21888e-10
RESULTS_SEARCH_7_PARAMETERS_MS_AUTO_CALIBRATION_OUT_c0	0.00013762
RESULTS_SEARCH_7_PARAMETERS_MS_AUTO_CALIBRATION_OUT_c1minus1	-6.15228e-06
RESULTS_SEARCH_7_PARAMETERS_MS_AUTO_CALIBRATION_OUT_c2	0
RESULTS_SEARCH_7_PARAMETERS_MS_AUTO_CALIBRATION_OUT_file	3
RESULTS_SEARCH_7_PARAMETERS_MS_AUTO_CALIBRATION_OUT_partnumber	4
RESULTS_SEARCH_7_PARAMETERS_MS_AUTO_CALIBRATION_OUT_polyorder	1
RESULTS_SEARCH_7_PARAMETERS_MS_AUTO_CALIBRATION_OUT_sample	1
RESULTS_SEARCH_7_PARAMETERS_MS_AUTO_CALIBRATION_OUT_squareroot	TRUE
RESULTS_SEARCH_7_PARAMETERS_MSMS_AUTO_CALIBRATION_OUT_avres	-1.3826e-07
RESULTS_SEARCH_7_PARAMETERS_MSMS_AUTO_CALIBRATION_OUT_c0	-2.47158e-06
RESULTS_SEARCH_7_PARAMETERS_MSMS_AUTO_CALIBRATION_OUT_c1minus1	4.62355e-07
RESULTS_SEARCH_7_PARAMETERS_MSMS_AUTO_CALIBRATION_OUT_c2	0
RESULTS_SEARCH_7_PARAMETERS_MSMS_AUTO_CALIBRATION_OUT_file	3
RESULTS_SEARCH_7_PARAMETERS_MSMS_AUTO_CALIBRATION_OUT_partnumber	4
RESULTS_SEARCH_7_PARAMETERS_MSMS_AUTO_CALIBRATION_OUT_polyorder	1
RESULTS_SEARCH_7_PARAMETERS_MSMS_AUTO_CALIBRATION_OUT_sample	1
RESULTS_SEARCH_7_PARAMETERS_MSMS_AUTO_CALIBRATION_OUT_squareroot	TRUE
RESULTS_SEARCH_7_PARAMETERS_MAX_PRECURSORS_FRAGLET	5
RESULTS_SEARCH_7_PARAMETERS_MAX_PRECURSORS_TAGLET	1
RESULTS_SEARCH_7_PARAMETERS_PRECURSORS_DR_FRAGLET	10
RESULTS_SEARCH_7_PARAMETERS_PRECURSORS_DR_TAGLET	3
RESULTS_SEARCH_7_PARAMETERS_DEFAULT_CHARGE_STATE_1_charge	2
RESULTS_SEARCH_7_PARAMETERS_DEFAULT_CHARGE_STATE_1_probability	1
RESULTS_SEARCH_7_PARAMETERS_DEFAULT_CHARGE_STATE_2_charge	3
RESULTS_SEARCH_7_PARAMETERS_DEFAULT_CHARGE_STATE_2_probability	1
RESULTS_SEARCH_7_PARAMETERS_DEFAULT_CHARGE_STATE_3_charge	4
RESULTS_SEARCH_7_PARAMETERS_DEFAULT_CHARGE_STATE_3_probability	1
RESULTS_SEARCH_7_PARAMETERS_VERSION	5.0.1.0, 4895
RESULTS_SEARCH_7_PARAMETERS_PARAGON_VERSION	5.0.1.0, 4874
RESULTS_SEARCH_7_PARAMETERS_APPLICATION	ProteinPilot(tm) Software
RESULTS_SEARCH_7_PARAMETERS_PROGROUP_alternativedispositionmaximumfoldprobabilitydrop	100
RESULTS_SEARCH_7_PARAMETERS_PROGROUP_alternativedispositionmaximumfoldscoredrop	2
RESULTS_SEARCH_7_PARAMETERS_PROGROUP_autodiscordantpeptidethreshold	0.3
RESULTS_SEARCH_7_PARAMETERS_PROGROUP_bayesconfidencecalclulation	TRUE
RESULTS_SEARCH_7_PARAMETERS_PROGROUP_calibrateconfidence	TRUE
RESULTS_SEARCH_7_PARAMETERS_PROGROUP_compresspeptides	FALSE
RESULTS_SEARCH_7_PARAMETERS_PROGROUP_confidencepercentthresholdforexcludingothersfromquant	15
RESULTS_SEARCH_7_PARAMETERS_PROGROUP_confidencepercentthresholdforincludingselfinquant	15
RESULTS_SEARCH_7_PARAMETERS_PROGROUP_donotstoremspeaklists	FALSE
RESULTS_SEARCH_7_PARAMETERS_PROGROUP_fasta	C:\AB SCIEX\ProteinPilot Data\SearchDatabases\uniprot-zebrafish_with_Clover.fasta
RESULTS_SEARCH_7_PARAMETERS_PROGROUP_featuregroupminpepconf	0.66
RESULTS_SEARCH_7_PARAMETERS_PROGROUP_featuregroupminups	0.47
RESULTS_SEARCH_7_PARAMETERS_PROGROUP_focusingintersection	4
RESULTS_SEARCH_7_PARAMETERS_PROGROUP_focusingminimummatchconfidence	0.1
RESULTS_SEARCH_7_PARAMETERS_PROGROUP_focusingminunusedprotscore	0.1
RESULTS_SEARCH_7_PARAMETERS_PROGROUP_focusingsubsetcutoff	6
RESULTS_SEARCH_7_PARAMETERS_PROGROUP_intersection	1.3
RESULTS_SEARCH_7_PARAMETERS_PROGROUP_minimummatchconfidencecutoff	0.001
RESULTS_SEARCH_7_PARAMETERS_PROGROUP_minunusedprotscore	0.0458
RESULTS_SEARCH_7_PARAMETERS_PROGROUP_subsetcutoff	2
RESULTS_SEARCH_7_PARAMETERS_PROGROUP_unusedprotscorethresholdforexcludingothersfromquant	1.3
RESULTS_SEARCH_7_PARAMETERS_PEAKLIST_count	3716
RESULTS_SEARCH_7_PARAMETERS_PEAKLIST_filenumber	3
RESULTS_SEARCH_7_PARAMETERS_PEAKLIST_original_count	3716
RESULTS_SEARCH_7_PARAMETERS_PEAKLIST_originalfilename	C:\AB SCIEX\ProteinPilot Data\Results\Albert\ZX 20200624 6600\ZX 20200624 C4A 3.wiff
RESULTS_SEARCH_7_PARAMETERS_PEAKLIST_partnumber	4
RESULTS_SEARCH_7_PARAMETERS_QUANT_TYPE_background_correction	FALSE
RESULTS_SEARCH_7_PARAMETERS_QUANT_TYPE_bias_correction	TRUE
RESULTS_SEARCH_7_PARAMETERS_QUANT_TYPE_keep_extreme_peptides_over_fraction	0
RESULTS_SEARCH_7_PARAMETERS_QUANT_TYPE_low_confidence_check	TRUE
RESULTS_SEARCH_7_PARAMETERS_QUANT_TYPE_low_intensity_check	TRUE
RESULTS_SEARCH_7_PARAMETERS_QUANT_TYPE_median_statistic	TRUE
RESULTS_SEARCH_7_PARAMETERS_QUANT_TYPE_mod_check	TRUE
RESULTS_SEARCH_7_PARAMETERS_QUANT_TYPE_quant_threshold	-1
RESULTS_SEARCH_7_PARAMETERS_QUANT_TYPE_quant_threshold_sn	9
RESULTS_SEARCH_7_PARAMETERS_QUANT_TYPE_separate_searches	FALSE
RESULTS_SEARCH_7_PARAMETERS_QUANT_TYPE_shared_msms_check	TRUE
RESULTS_SEARCH_7_PARAMETERS_PARAGON_METHOD_SETTINGS_UI_SAMPLE_TYPE	Identification
RESULTS_SEARCH_7_PARAMETERS_PARAGON_METHOD_SETTINGS_UI_CYS_ALKYLATION	Iodoacetamide w other Cys mods possible
RESULTS_SEARCH_7_PARAMETERS_PARAGON_METHOD_SETTINGS_UI_DIGESTION	Trypsin + Lys C
RESULTS_SEARCH_7_PARAMETERS_PARAGON_METHOD_SETTINGS_UI_SPECIAL_FACTOR	Gel-based ID
RESULTS_SEARCH_7_PARAMETERS_PARAGON_METHOD_SETTINGS_UI_INSTRUMENT	TripleTOF 6600
RESULTS_SEARCH_7_PARAMETERS_PARAGON_METHOD_SETTINGS_UI_SEARCH_EFFORT	Thorough
RESULTS_SEARCH_7_PARAMETERS_PARAGON_METHOD_SETTINGS_UI_USER_NAME	IMB-MASS02\massuser
RESULTS_SEARCH_7_PARAMETERS_PARAGON_METHOD_SETTINGS_UI_MACHINE_NAME	IMB-MASS02
RESULTS_SEARCH_7_PARAMETERS_PARAGON_METHOD_SETTINGS_UI_SEARCH_ID	6.37467e+17
RESULTS_SEARCH_7_PARAMETERS_PARAGON_METHOD_SETTINGS_UI_START_TIME	2021-01-19 16:08:23
RESULTS_SEARCH_7_PARAMETERS_PARAGON_METHOD_SETTINGS_UI_MIN_UNUSED_PROTSCORE	0.0458
RESULTS_SEARCH_7_PARAMETERS_PARAGON_METHOD_SETTINGS_UI_PSPEP	TRUE
RESULTS_SEARCH_8_time_cpu	320597
RESULTS_SEARCH_8_time_duration	372776
RESULTS_SEARCH_8_version	5.0.1.4874
RESULTS_SEARCH_8_xml:id	SEARCH:2:637466692955257639_3
RESULTS_SEARCH_8_PARAMETERS_chemical_data_edited	FALSE
RESULTS_SEARCH_8_PARAMETERS_do_multiprecursor_search	TRUE
RESULTS_SEARCH_8_PARAMETERS_do_reverse_search	TRUE
RESULTS_SEARCH_8_PARAMETERS_max_quant_labels	35
RESULTS_SEARCH_8_PARAMETERS_maxresults	15
RESULTS_SEARCH_8_PARAMETERS_separate_searches	FALSE
RESULTS_SEARCH_8_PARAMETERS_MSTOLERANCE_type	dalton
RESULTS_SEARCH_8_PARAMETERS_MSTOLERANCE_value	0.05
RESULTS_SEARCH_8_PARAMETERS_MSMSTOLERANCE_type	dalton
RESULTS_SEARCH_8_PARAMETERS_MSMSTOLERANCE_value	0.1
RESULTS_SEARCH_8_PARAMETERS_MS_STANDARD_DEVIATION_type	dalton
RESULTS_SEARCH_8_PARAMETERS_MS_STANDARD_DEVIATION_value	0.0011
RESULTS_SEARCH_8_PARAMETERS_MSMS_STANDARD_DEVIATION_type	dalton
RESULTS_SEARCH_8_PARAMETERS_MSMS_STANDARD_DEVIATION_value	0.01
RESULTS_SEARCH_8_PARAMETERS_FASTA_filename	C:\AB SCIEX\ProteinPilot Data\SearchDatabases\uniprot-zebrafish_with_Clover.fasta
RESULTS_SEARCH_8_PARAMETERS_AUTO_CALIBRATION_ms	TRUE
RESULTS_SEARCH_8_PARAMETERS_AUTO_CALIBRATION_msexport	FALSE
RESULTS_SEARCH_8_PARAMETERS_AUTO_CALIBRATION_msms	TRUE
RESULTS_SEARCH_8_PARAMETERS_AUTO_CALIBRATION_msmstolsdratio	2.75
RESULTS_SEARCH_8_PARAMETERS_AUTO_CALIBRATION_mstolsdratio	7
RESULTS_SEARCH_8_PARAMETERS_AUTO_CALIBRATION_squareroot	TRUE
RESULTS_SEARCH_8_PARAMETERS_AUTO_CALIBRATION_type	dalton
RESULTS_SEARCH_8_PARAMETERS_AUTO_CALIBRATION_MCP_d_s_s_f	0.0666667
RESULTS_SEARCH_8_PARAMETERS_AUTO_CALIBRATION_MCP_d_s_w_f	3
RESULTS_SEARCH_8_PARAMETERS_AUTO_CALIBRATION_MCP_m_f_r_mbc	200
RESULTS_SEARCH_8_PARAMETERS_AUTO_CALIBRATION_MCP_m_m_c	10
RESULTS_SEARCH_8_PARAMETERS_AUTO_CALIBRATION_MCP_m_m_f_s	0.25
RESULTS_SEARCH_8_PARAMETERS_AUTO_CALIBRATION_MCP_m_m_p_f	0.33
RESULTS_SEARCH_8_PARAMETERS_AUTO_CALIBRATION_MCP_m_m_p_rms_f	1
RESULTS_SEARCH_8_PARAMETERS_AUTO_CALIBRATION_MCP_m_p_t_f	1
RESULTS_SEARCH_8_PARAMETERS_AUTO_CALIBRATION_MCP_m_r_h_n_b	15
RESULTS_SEARCH_8_PARAMETERS_AUTO_CALIBRATION_MCP_m_z_n_s	99
RESULTS_SEARCH_8_PARAMETERS_AUTO_CALIBRATION_MCP_m_z_s_mn_f_r	0.0666667
RESULTS_SEARCH_8_PARAMETERS_AUTO_CALIBRATION_MCP_m_z_s_mx_f_r	0.1
RESULTS_SEARCH_8_PARAMETERS_MS_AUTO_CALIBRATION_OUT_avres	-2.21888e-10
RESULTS_SEARCH_8_PARAMETERS_MS_AUTO_CALIBRATION_OUT_c0	0.00013762
RESULTS_SEARCH_8_PARAMETERS_MS_AUTO_CALIBRATION_OUT_c1minus1	-6.15228e-06
RESULTS_SEARCH_8_PARAMETERS_MS_AUTO_CALIBRATION_OUT_c2	0
RESULTS_SEARCH_8_PARAMETERS_MS_AUTO_CALIBRATION_OUT_file	3
RESULTS_SEARCH_8_PARAMETERS_MS_AUTO_CALIBRATION_OUT_partnumber	4
RESULTS_SEARCH_8_PARAMETERS_MS_AUTO_CALIBRATION_OUT_polyorder	1
RESULTS_SEARCH_8_PARAMETERS_MS_AUTO_CALIBRATION_OUT_sample	1
RESULTS_SEARCH_8_PARAMETERS_MS_AUTO_CALIBRATION_OUT_squareroot	TRUE
RESULTS_SEARCH_8_PARAMETERS_MSMS_AUTO_CALIBRATION_OUT_avres	-1.3826e-07
RESULTS_SEARCH_8_PARAMETERS_MSMS_AUTO_CALIBRATION_OUT_c0	-2.47158e-06
RESULTS_SEARCH_8_PARAMETERS_MSMS_AUTO_CALIBRATION_OUT_c1minus1	4.62355e-07
RESULTS_SEARCH_8_PARAMETERS_MSMS_AUTO_CALIBRATION_OUT_c2	0
RESULTS_SEARCH_8_PARAMETERS_MSMS_AUTO_CALIBRATION_OUT_file	3
RESULTS_SEARCH_8_PARAMETERS_MSMS_AUTO_CALIBRATION_OUT_partnumber	4
RESULTS_SEARCH_8_PARAMETERS_MSMS_AUTO_CALIBRATION_OUT_polyorder	1
RESULTS_SEARCH_8_PARAMETERS_MSMS_AUTO_CALIBRATION_OUT_sample	1
RESULTS_SEARCH_8_PARAMETERS_MSMS_AUTO_CALIBRATION_OUT_squareroot	TRUE
RESULTS_SEARCH_8_PARAMETERS_MAX_PRECURSORS_FRAGLET	5
RESULTS_SEARCH_8_PARAMETERS_MAX_PRECURSORS_TAGLET	1
RESULTS_SEARCH_8_PARAMETERS_PRECURSORS_DR_FRAGLET	10
RESULTS_SEARCH_8_PARAMETERS_PRECURSORS_DR_TAGLET	3
RESULTS_SEARCH_8_PARAMETERS_DEFAULT_CHARGE_STATE_1_charge	2
RESULTS_SEARCH_8_PARAMETERS_DEFAULT_CHARGE_STATE_1_probability	1
RESULTS_SEARCH_8_PARAMETERS_DEFAULT_CHARGE_STATE_2_charge	1900-01-03
RESULTS_SEARCH_8_PARAMETERS_DEFAULT_CHARGE_STATE_2_probability	1900-01-01
RESULTS_SEARCH_8_PARAMETERS_DEFAULT_CHARGE_STATE_3_charge	4
RESULTS_SEARCH_8_PARAMETERS_DEFAULT_CHARGE_STATE_3_probability	1
RESULTS_SEARCH_8_PARAMETERS_VERSION	5.0.1.0, 4895
RESULTS_SEARCH_8_PARAMETERS_PARAGON_VERSION	5.0.1.0, 4874
RESULTS_SEARCH_8_PARAMETERS_APPLICATION	ProteinPilot(tm) Software
RESULTS_SEARCH_8_PARAMETERS_PROGROUP_alternativedispositionmaximumfoldprobabilitydrop	100
RESULTS_SEARCH_8_PARAMETERS_PROGROUP_alternativedispositionmaximumfoldscoredrop	2
RESULTS_SEARCH_8_PARAMETERS_PROGROUP_autodiscordantpeptidethreshold	0.3
RESULTS_SEARCH_8_PARAMETERS_PROGROUP_bayesconfidencecalclulation	TRUE
RESULTS_SEARCH_8_PARAMETERS_PROGROUP_calibrateconfidence	TRUE
RESULTS_SEARCH_8_PARAMETERS_PROGROUP_compresspeptides	FALSE
RESULTS_SEARCH_8_PARAMETERS_PROGROUP_confidencepercentthresholdforexcludingothersfromquant	15
RESULTS_SEARCH_8_PARAMETERS_PROGROUP_confidencepercentthresholdforincludingselfinquant	15
RESULTS_SEARCH_8_PARAMETERS_PROGROUP_donotstoremspeaklists	FALSE
RESULTS_SEARCH_8_PARAMETERS_PROGROUP_fasta	C:\AB SCIEX\ProteinPilot Data\SearchDatabases\uniprot-zebrafish_with_Clover.fasta
RESULTS_SEARCH_8_PARAMETERS_PROGROUP_featuregroupminpepconf	0.66
RESULTS_SEARCH_8_PARAMETERS_PROGROUP_featuregroupminups	0.47
RESULTS_SEARCH_8_PARAMETERS_PROGROUP_focusingintersection	4
RESULTS_SEARCH_8_PARAMETERS_PROGROUP_focusingminimummatchconfidence	0.1
RESULTS_SEARCH_8_PARAMETERS_PROGROUP_focusingminunusedprotscore	0.1
RESULTS_SEARCH_8_PARAMETERS_PROGROUP_focusingsubsetcutoff	6
RESULTS_SEARCH_8_PARAMETERS_PROGROUP_intersection	1.3
RESULTS_SEARCH_8_PARAMETERS_PROGROUP_minimummatchconfidencecutoff	0.001
RESULTS_SEARCH_8_PARAMETERS_PROGROUP_minunusedprotscore	0.0458
RESULTS_SEARCH_8_PARAMETERS_PROGROUP_subsetcutoff	2
RESULTS_SEARCH_8_PARAMETERS_PROGROUP_unusedprotscorethresholdforexcludingothersfromquant	1.3
RESULTS_SEARCH_8_PARAMETERS_PEAKLIST_count	3716
RESULTS_SEARCH_8_PARAMETERS_PEAKLIST_filenumber	3
RESULTS_SEARCH_8_PARAMETERS_PEAKLIST_original_count	3716
RESULTS_SEARCH_8_PARAMETERS_PEAKLIST_originalfilename	C:\AB SCIEX\ProteinPilot Data\Results\Albert\ZX 20200624 6600\ZX 20200624 C4A 3.wiff
RESULTS_SEARCH_8_PARAMETERS_PEAKLIST_partnumber	4
RESULTS_SEARCH_8_PARAMETERS_QUANT_TYPE_background_correction	FALSE
RESULTS_SEARCH_8_PARAMETERS_QUANT_TYPE_bias_correction	TRUE
RESULTS_SEARCH_8_PARAMETERS_QUANT_TYPE_keep_extreme_peptides_over_fraction	0
RESULTS_SEARCH_8_PARAMETERS_QUANT_TYPE_low_confidence_check	TRUE
RESULTS_SEARCH_8_PARAMETERS_QUANT_TYPE_low_intensity_check	TRUE
RESULTS_SEARCH_8_PARAMETERS_QUANT_TYPE_median_statistic	TRUE
RESULTS_SEARCH_8_PARAMETERS_QUANT_TYPE_mod_check	TRUE
RESULTS_SEARCH_8_PARAMETERS_QUANT_TYPE_quant_threshold	-1
RESULTS_SEARCH_8_PARAMETERS_QUANT_TYPE_quant_threshold_sn	9
RESULTS_SEARCH_8_PARAMETERS_QUANT_TYPE_separate_searches	FALSE
RESULTS_SEARCH_8_PARAMETERS_QUANT_TYPE_shared_msms_check	TRUE
RESULTS_SEARCH_8_PARAMETERS_PARAGON_METHOD_SETTINGS_UI_SAMPLE_TYPE	Identification
RESULTS_SEARCH_8_PARAMETERS_PARAGON_METHOD_SETTINGS_UI_CYS_ALKYLATION	Iodoacetamide w other Cys mods possible
RESULTS_SEARCH_8_PARAMETERS_PARAGON_METHOD_SETTINGS_UI_DIGESTION	Trypsin + Lys C
RESULTS_SEARCH_8_PARAMETERS_PARAGON_METHOD_SETTINGS_UI_SPECIAL_FACTOR	Gel-based ID
RESULTS_SEARCH_8_PARAMETERS_PARAGON_METHOD_SETTINGS_UI_INSTRUMENT	TripleTOF 6600
RESULTS_SEARCH_8_PARAMETERS_PARAGON_METHOD_SETTINGS_UI_SEARCH_EFFORT	Thorough
RESULTS_SEARCH_8_PARAMETERS_PARAGON_METHOD_SETTINGS_UI_USER_NAME	IMB-MASS02\massuser
RESULTS_SEARCH_8_PARAMETERS_PARAGON_METHOD_SETTINGS_UI_MACHINE_NAME	IMB-MASS02
RESULTS_SEARCH_8_PARAMETERS_PARAGON_METHOD_SETTINGS_UI_SEARCH_ID	6.37467e+17
RESULTS_SEARCH_8_PARAMETERS_PARAGON_METHOD_SETTINGS_UI_START_TIME	2021-01-19 16:08:23
RESULTS_SEARCH_8_PARAMETERS_PARAGON_METHOD_SETTINGS_UI_MIN_UNUSED_PROTSCORE	0.0458
RESULTS_SEARCH_8_PARAMETERS_PARAGON_METHOD_SETTINGS_UI_PSPEP	TRUE
RESULTS_SEARCH_9_time_cpu	325480
RESULTS_SEARCH_9_time_duration	364898
RESULTS_SEARCH_9_version	5.0.1.4874
RESULTS_SEARCH_9_xml:id	SEARCH:1:637466692955257639_4
RESULTS_SEARCH_9_PARAMETERS_chemical_data_edited	FALSE
RESULTS_SEARCH_9_PARAMETERS_do_multiprecursor_search	TRUE
RESULTS_SEARCH_9_PARAMETERS_do_reverse_search	TRUE
RESULTS_SEARCH_9_PARAMETERS_max_quant_labels	35
RESULTS_SEARCH_9_PARAMETERS_maxresults	15
RESULTS_SEARCH_9_PARAMETERS_separate_searches	FALSE
RESULTS_SEARCH_9_PARAMETERS_MSTOLERANCE_type	dalton
RESULTS_SEARCH_9_PARAMETERS_MSTOLERANCE_value	0.05
RESULTS_SEARCH_9_PARAMETERS_MSMSTOLERANCE_type	dalton
RESULTS_SEARCH_9_PARAMETERS_MSMSTOLERANCE_value	0.1
RESULTS_SEARCH_9_PARAMETERS_MS_STANDARD_DEVIATION_type	dalton
RESULTS_SEARCH_9_PARAMETERS_MS_STANDARD_DEVIATION_value	0.0011
RESULTS_SEARCH_9_PARAMETERS_MSMS_STANDARD_DEVIATION_type	dalton
RESULTS_SEARCH_9_PARAMETERS_MSMS_STANDARD_DEVIATION_value	0.01
RESULTS_SEARCH_9_PARAMETERS_FASTA_filename	C:\AB SCIEX\ProteinPilot Data\SearchDatabases\uniprot-zebrafish_with_Clover.fasta
RESULTS_SEARCH_9_PARAMETERS_AUTO_CALIBRATION_ms	TRUE
RESULTS_SEARCH_9_PARAMETERS_AUTO_CALIBRATION_msexport	FALSE
RESULTS_SEARCH_9_PARAMETERS_AUTO_CALIBRATION_msms	TRUE
RESULTS_SEARCH_9_PARAMETERS_AUTO_CALIBRATION_msmstolsdratio	2.75
RESULTS_SEARCH_9_PARAMETERS_AUTO_CALIBRATION_mstolsdratio	7
RESULTS_SEARCH_9_PARAMETERS_AUTO_CALIBRATION_squareroot	TRUE
RESULTS_SEARCH_9_PARAMETERS_AUTO_CALIBRATION_type	dalton
RESULTS_SEARCH_9_PARAMETERS_AUTO_CALIBRATION_MCP_d_s_s_f	0.0666667
RESULTS_SEARCH_9_PARAMETERS_AUTO_CALIBRATION_MCP_d_s_w_f	3
RESULTS_SEARCH_9_PARAMETERS_AUTO_CALIBRATION_MCP_m_f_r_mbc	200
RESULTS_SEARCH_9_PARAMETERS_AUTO_CALIBRATION_MCP_m_m_c	10
RESULTS_SEARCH_9_PARAMETERS_AUTO_CALIBRATION_MCP_m_m_f_s	0.25
RESULTS_SEARCH_9_PARAMETERS_AUTO_CALIBRATION_MCP_m_m_p_f	0.33
RESULTS_SEARCH_9_PARAMETERS_AUTO_CALIBRATION_MCP_m_m_p_rms_f	1
RESULTS_SEARCH_9_PARAMETERS_AUTO_CALIBRATION_MCP_m_p_t_f	1
RESULTS_SEARCH_9_PARAMETERS_AUTO_CALIBRATION_MCP_m_r_h_n_b	15
RESULTS_SEARCH_9_PARAMETERS_AUTO_CALIBRATION_MCP_m_z_n_s	99
RESULTS_SEARCH_9_PARAMETERS_AUTO_CALIBRATION_MCP_m_z_s_mn_f_r	0.0666667
RESULTS_SEARCH_9_PARAMETERS_AUTO_CALIBRATION_MCP_m_z_s_mx_f_r	0.1
RESULTS_SEARCH_9_PARAMETERS_MAX_PRECURSORS_FRAGLET	5
RESULTS_SEARCH_9_PARAMETERS_MAX_PRECURSORS_TAGLET	1
RESULTS_SEARCH_9_PARAMETERS_PRECURSORS_DR_FRAGLET	10
RESULTS_SEARCH_9_PARAMETERS_PRECURSORS_DR_TAGLET	3
RESULTS_SEARCH_9_PARAMETERS_DEFAULT_CHARGE_STATE_1_charge	2
RESULTS_SEARCH_9_PARAMETERS_DEFAULT_CHARGE_STATE_1_probability	1
RESULTS_SEARCH_9_PARAMETERS_DEFAULT_CHARGE_STATE_2_charge	3
RESULTS_SEARCH_9_PARAMETERS_DEFAULT_CHARGE_STATE_2_probability	1
RESULTS_SEARCH_9_PARAMETERS_DEFAULT_CHARGE_STATE_3_charge	4
RESULTS_SEARCH_9_PARAMETERS_DEFAULT_CHARGE_STATE_3_probability	1
RESULTS_SEARCH_9_PARAMETERS_VERSION	5.0.1.0, 4895
RESULTS_SEARCH_9_PARAMETERS_PARAGON_VERSION	5.0.1.0, 4874
RESULTS_SEARCH_9_PARAMETERS_APPLICATION	ProteinPilot(tm) Software
RESULTS_SEARCH_9_PARAMETERS_PROGROUP_alternativedispositionmaximumfoldprobabilitydrop	100
RESULTS_SEARCH_9_PARAMETERS_PROGROUP_alternativedispositionmaximumfoldscoredrop	2
RESULTS_SEARCH_9_PARAMETERS_PROGROUP_autodiscordantpeptidethreshold	0.3
RESULTS_SEARCH_9_PARAMETERS_PROGROUP_bayesconfidencecalclulation	TRUE
RESULTS_SEARCH_9_PARAMETERS_PROGROUP_calibrateconfidence	TRUE
RESULTS_SEARCH_9_PARAMETERS_PROGROUP_compresspeptides	FALSE
RESULTS_SEARCH_9_PARAMETERS_PROGROUP_confidencepercentthresholdforexcludingothersfromquant	15
RESULTS_SEARCH_9_PARAMETERS_PROGROUP_confidencepercentthresholdforincludingselfinquant	15
RESULTS_SEARCH_9_PARAMETERS_PROGROUP_donotstoremspeaklists	FALSE
RESULTS_SEARCH_9_PARAMETERS_PROGROUP_fasta	C:\AB SCIEX\ProteinPilot Data\SearchDatabases\uniprot-zebrafish_with_Clover.fasta
RESULTS_SEARCH_9_PARAMETERS_PROGROUP_featuregroupminpepconf	0.66
RESULTS_SEARCH_9_PARAMETERS_PROGROUP_featuregroupminups	0.47
RESULTS_SEARCH_9_PARAMETERS_PROGROUP_focusingintersection	4
RESULTS_SEARCH_9_PARAMETERS_PROGROUP_focusingminimummatchconfidence	0.1
RESULTS_SEARCH_9_PARAMETERS_PROGROUP_focusingminunusedprotscore	0.1
RESULTS_SEARCH_9_PARAMETERS_PROGROUP_focusingsubsetcutoff	6
RESULTS_SEARCH_9_PARAMETERS_PROGROUP_intersection	1.3
RESULTS_SEARCH_9_PARAMETERS_PROGROUP_minimummatchconfidencecutoff	0.001
RESULTS_SEARCH_9_PARAMETERS_PROGROUP_minunusedprotscore	0.0458
RESULTS_SEARCH_9_PARAMETERS_PROGROUP_subsetcutoff	2
RESULTS_SEARCH_9_PARAMETERS_PROGROUP_unusedprotscorethresholdforexcludingothersfromquant	1.3
RESULTS_SEARCH_9_PARAMETERS_PEAKLIST_count	2966
RESULTS_SEARCH_9_PARAMETERS_PEAKLIST_filenumber	4
RESULTS_SEARCH_9_PARAMETERS_PEAKLIST_original_count	2966
RESULTS_SEARCH_9_PARAMETERS_PEAKLIST_originalfilename	C:\AB SCIEX\ProteinPilot Data\Results\Albert\ZX 20200624 6600\ZX 20200624 C4A 4.wiff
RESULTS_SEARCH_9_PARAMETERS_PEAKLIST_partnumber	5
RESULTS_SEARCH_9_PARAMETERS_QUANT_TYPE_background_correction	FALSE
RESULTS_SEARCH_9_PARAMETERS_QUANT_TYPE_bias_correction	TRUE
RESULTS_SEARCH_9_PARAMETERS_QUANT_TYPE_keep_extreme_peptides_over_fraction	0
RESULTS_SEARCH_9_PARAMETERS_QUANT_TYPE_low_confidence_check	TRUE
RESULTS_SEARCH_9_PARAMETERS_QUANT_TYPE_low_intensity_check	TRUE
RESULTS_SEARCH_9_PARAMETERS_QUANT_TYPE_median_statistic	TRUE
RESULTS_SEARCH_9_PARAMETERS_QUANT_TYPE_mod_check	TRUE
RESULTS_SEARCH_9_PARAMETERS_QUANT_TYPE_quant_threshold	-1
RESULTS_SEARCH_9_PARAMETERS_QUANT_TYPE_quant_threshold_sn	9
RESULTS_SEARCH_9_PARAMETERS_QUANT_TYPE_separate_searches	FALSE
RESULTS_SEARCH_9_PARAMETERS_QUANT_TYPE_shared_msms_check	TRUE
RESULTS_SEARCH_9_PARAMETERS_PARAGON_METHOD_SETTINGS_UI_SAMPLE_TYPE	Identification
RESULTS_SEARCH_9_PARAMETERS_PARAGON_METHOD_SETTINGS_UI_CYS_ALKYLATION	Iodoacetamide w other Cys mods possible
RESULTS_SEARCH_9_PARAMETERS_PARAGON_METHOD_SETTINGS_UI_DIGESTION	Trypsin + Lys C
RESULTS_SEARCH_9_PARAMETERS_PARAGON_METHOD_SETTINGS_UI_SPECIAL_FACTOR	Gel-based ID
RESULTS_SEARCH_9_PARAMETERS_PARAGON_METHOD_SETTINGS_UI_INSTRUMENT	TripleTOF 6600
RESULTS_SEARCH_9_PARAMETERS_PARAGON_METHOD_SETTINGS_UI_SEARCH_EFFORT	Thorough
RESULTS_SEARCH_9_PARAMETERS_PARAGON_METHOD_SETTINGS_UI_USER_NAME	IMB-MASS02\massuser
RESULTS_SEARCH_9_PARAMETERS_PARAGON_METHOD_SETTINGS_UI_MACHINE_NAME	IMB-MASS02
RESULTS_SEARCH_9_PARAMETERS_PARAGON_METHOD_SETTINGS_UI_SEARCH_ID	6.37467e+17
RESULTS_SEARCH_9_PARAMETERS_PARAGON_METHOD_SETTINGS_UI_START_TIME	2021-01-19 16:08:23
RESULTS_SEARCH_9_PARAMETERS_PARAGON_METHOD_SETTINGS_UI_MIN_UNUSED_PROTSCORE	0.0458
RESULTS_SEARCH_9_PARAMETERS_PARAGON_METHOD_SETTINGS_UI_PSPEP	TRUE
RESULTS_SEARCH_10_time_cpu	293609
RESULTS_SEARCH_10_time_duration	365537
RESULTS_SEARCH_10_version	5.0.1.4874
RESULTS_SEARCH_10_xml:id	SEARCH:2:637466692955257639_4
RESULTS_SEARCH_10_PARAMETERS_chemical_data_edited	FALSE
RESULTS_SEARCH_10_PARAMETERS_do_multiprecursor_search	TRUE
RESULTS_SEARCH_10_PARAMETERS_do_reverse_search	TRUE
RESULTS_SEARCH_10_PARAMETERS_max_quant_labels	35
RESULTS_SEARCH_10_PARAMETERS_maxresults	15
RESULTS_SEARCH_10_PARAMETERS_separate_searches	FALSE
RESULTS_SEARCH_10_PARAMETERS_MSTOLERANCE_type	dalton
RESULTS_SEARCH_10_PARAMETERS_MSTOLERANCE_value	0.05
RESULTS_SEARCH_10_PARAMETERS_MSMSTOLERANCE_type	dalton
RESULTS_SEARCH_10_PARAMETERS_MSMSTOLERANCE_value	0.1
RESULTS_SEARCH_10_PARAMETERS_MS_STANDARD_DEVIATION_type	dalton
RESULTS_SEARCH_10_PARAMETERS_MS_STANDARD_DEVIATION_value	0.0011
RESULTS_SEARCH_10_PARAMETERS_MSMS_STANDARD_DEVIATION_type	dalton
RESULTS_SEARCH_10_PARAMETERS_MSMS_STANDARD_DEVIATION_value	0.01
RESULTS_SEARCH_10_PARAMETERS_FASTA_filename	C:\AB SCIEX\ProteinPilot Data\SearchDatabases\uniprot-zebrafish_with_Clover.fasta
RESULTS_SEARCH_10_PARAMETERS_AUTO_CALIBRATION_ms	TRUE
RESULTS_SEARCH_10_PARAMETERS_AUTO_CALIBRATION_msexport	FALSE
RESULTS_SEARCH_10_PARAMETERS_AUTO_CALIBRATION_msms	TRUE
RESULTS_SEARCH_10_PARAMETERS_AUTO_CALIBRATION_msmstolsdratio	2.75
RESULTS_SEARCH_10_PARAMETERS_AUTO_CALIBRATION_mstolsdratio	7
RESULTS_SEARCH_10_PARAMETERS_AUTO_CALIBRATION_squareroot	TRUE
RESULTS_SEARCH_10_PARAMETERS_AUTO_CALIBRATION_type	dalton
RESULTS_SEARCH_10_PARAMETERS_AUTO_CALIBRATION_MCP_d_s_s_f	0.0666667
RESULTS_SEARCH_10_PARAMETERS_AUTO_CALIBRATION_MCP_d_s_w_f	3
RESULTS_SEARCH_10_PARAMETERS_AUTO_CALIBRATION_MCP_m_f_r_mbc	200
RESULTS_SEARCH_10_PARAMETERS_AUTO_CALIBRATION_MCP_m_m_c	10
RESULTS_SEARCH_10_PARAMETERS_AUTO_CALIBRATION_MCP_m_m_f_s	0.25
RESULTS_SEARCH_10_PARAMETERS_AUTO_CALIBRATION_MCP_m_m_p_f	0.33
RESULTS_SEARCH_10_PARAMETERS_AUTO_CALIBRATION_MCP_m_m_p_rms_f	1
RESULTS_SEARCH_10_PARAMETERS_AUTO_CALIBRATION_MCP_m_p_t_f	1
RESULTS_SEARCH_10_PARAMETERS_AUTO_CALIBRATION_MCP_m_r_h_n_b	15
RESULTS_SEARCH_10_PARAMETERS_AUTO_CALIBRATION_MCP_m_z_n_s	99
RESULTS_SEARCH_10_PARAMETERS_AUTO_CALIBRATION_MCP_m_z_s_mn_f_r	0.0666667
RESULTS_SEARCH_10_PARAMETERS_AUTO_CALIBRATION_MCP_m_z_s_mx_f_r	0.1
RESULTS_SEARCH_10_PARAMETERS_MAX_PRECURSORS_FRAGLET	5
RESULTS_SEARCH_10_PARAMETERS_MAX_PRECURSORS_TAGLET	1
RESULTS_SEARCH_10_PARAMETERS_PRECURSORS_DR_FRAGLET	10
RESULTS_SEARCH_10_PARAMETERS_PRECURSORS_DR_TAGLET	3
RESULTS_SEARCH_10_PARAMETERS_DEFAULT_CHARGE_STATE_1_charge	2
RESULTS_SEARCH_10_PARAMETERS_DEFAULT_CHARGE_STATE_1_probability	1
RESULTS_SEARCH_10_PARAMETERS_DEFAULT_CHARGE_STATE_2_charge	3
RESULTS_SEARCH_10_PARAMETERS_DEFAULT_CHARGE_STATE_2_probability	1
RESULTS_SEARCH_10_PARAMETERS_DEFAULT_CHARGE_STATE_3_charge	4
RESULTS_SEARCH_10_PARAMETERS_DEFAULT_CHARGE_STATE_3_probability	1
RESULTS_SEARCH_10_PARAMETERS_VERSION	5.0.1.0, 4895
RESULTS_SEARCH_10_PARAMETERS_PARAGON_VERSION	5.0.1.0, 4874
RESULTS_SEARCH_10_PARAMETERS_APPLICATION	ProteinPilot(tm) Software
RESULTS_SEARCH_10_PARAMETERS_PROGROUP_alternativedispositionmaximumfoldprobabilitydrop	100
RESULTS_SEARCH_10_PARAMETERS_PROGROUP_alternativedispositionmaximumfoldscoredrop	2
RESULTS_SEARCH_10_PARAMETERS_PROGROUP_autodiscordantpeptidethreshold	0.3
RESULTS_SEARCH_10_PARAMETERS_PROGROUP_bayesconfidencecalclulation	TRUE
RESULTS_SEARCH_10_PARAMETERS_PROGROUP_calibrateconfidence	TRUE
RESULTS_SEARCH_10_PARAMETERS_PROGROUP_compresspeptides	FALSE
RESULTS_SEARCH_10_PARAMETERS_PROGROUP_confidencepercentthresholdforexcludingothersfromquant	15
RESULTS_SEARCH_10_PARAMETERS_PROGROUP_confidencepercentthresholdforincludingselfinquant	15
RESULTS_SEARCH_10_PARAMETERS_PROGROUP_donotstoremspeaklists	FALSE
RESULTS_SEARCH_10_PARAMETERS_PROGROUP_fasta	C:\AB SCIEX\ProteinPilot Data\SearchDatabases\uniprot-zebrafish_with_Clover.fasta
RESULTS_SEARCH_10_PARAMETERS_PROGROUP_featuregroupminpepconf	0.66
RESULTS_SEARCH_10_PARAMETERS_PROGROUP_featuregroupminups	0.47
RESULTS_SEARCH_10_PARAMETERS_PROGROUP_focusingintersection	4
RESULTS_SEARCH_10_PARAMETERS_PROGROUP_focusingminimummatchconfidence	0.1
RESULTS_SEARCH_10_PARAMETERS_PROGROUP_focusingminunusedprotscore	0.1
RESULTS_SEARCH_10_PARAMETERS_PROGROUP_focusingsubsetcutoff	6
RESULTS_SEARCH_10_PARAMETERS_PROGROUP_intersection	1.3
RESULTS_SEARCH_10_PARAMETERS_PROGROUP_minimummatchconfidencecutoff	0.001
RESULTS_SEARCH_10_PARAMETERS_PROGROUP_minunusedprotscore	0.0458
RESULTS_SEARCH_10_PARAMETERS_PROGROUP_subsetcutoff	2
RESULTS_SEARCH_10_PARAMETERS_PROGROUP_unusedprotscorethresholdforexcludingothersfromquant	1.3
RESULTS_SEARCH_10_PARAMETERS_PEAKLIST_count	2966
RESULTS_SEARCH_10_PARAMETERS_PEAKLIST_filenumber	4
RESULTS_SEARCH_10_PARAMETERS_PEAKLIST_original_count	2966
RESULTS_SEARCH_10_PARAMETERS_PEAKLIST_originalfilename	C:\AB SCIEX\ProteinPilot Data\Results\Albert\ZX 20200624 6600\ZX 20200624 C4A 4.wiff
RESULTS_SEARCH_10_PARAMETERS_PEAKLIST_partnumber	5
RESULTS_SEARCH_10_PARAMETERS_QUANT_TYPE_background_correction	FALSE
RESULTS_SEARCH_10_PARAMETERS_QUANT_TYPE_bias_correction	TRUE
RESULTS_SEARCH_10_PARAMETERS_QUANT_TYPE_keep_extreme_peptides_over_fraction	0
RESULTS_SEARCH_10_PARAMETERS_QUANT_TYPE_low_confidence_check	TRUE
RESULTS_SEARCH_10_PARAMETERS_QUANT_TYPE_low_intensity_check	TRUE
RESULTS_SEARCH_10_PARAMETERS_QUANT_TYPE_median_statistic	TRUE
RESULTS_SEARCH_10_PARAMETERS_QUANT_TYPE_mod_check	TRUE
RESULTS_SEARCH_10_PARAMETERS_QUANT_TYPE_quant_threshold	-1
RESULTS_SEARCH_10_PARAMETERS_QUANT_TYPE_quant_threshold_sn	9
RESULTS_SEARCH_10_PARAMETERS_QUANT_TYPE_separate_searches	FALSE
RESULTS_SEARCH_10_PARAMETERS_QUANT_TYPE_shared_msms_check	TRUE
RESULTS_SEARCH_10_PARAMETERS_PARAGON_METHOD_SETTINGS_UI_SAMPLE_TYPE	Identification
RESULTS_SEARCH_10_PARAMETERS_PARAGON_METHOD_SETTINGS_UI_CYS_ALKYLATION	Iodoacetamide w other Cys mods possible
RESULTS_SEARCH_10_PARAMETERS_PARAGON_METHOD_SETTINGS_UI_DIGESTION	Trypsin + Lys C
RESULTS_SEARCH_10_PARAMETERS_PARAGON_METHOD_SETTINGS_UI_SPECIAL_FACTOR	Gel-based ID
RESULTS_SEARCH_10_PARAMETERS_PARAGON_METHOD_SETTINGS_UI_INSTRUMENT	TripleTOF 6600
RESULTS_SEARCH_10_PARAMETERS_PARAGON_METHOD_SETTINGS_UI_SEARCH_EFFORT	Thorough
RESULTS_SEARCH_10_PARAMETERS_PARAGON_METHOD_SETTINGS_UI_USER_NAME	IMB-MASS02\massuser
RESULTS_SEARCH_10_PARAMETERS_PARAGON_METHOD_SETTINGS_UI_MACHINE_NAME	IMB-MASS02
RESULTS_SEARCH_10_PARAMETERS_PARAGON_METHOD_SETTINGS_UI_SEARCH_ID	6.37467e+17
RESULTS_SEARCH_10_PARAMETERS_PARAGON_METHOD_SETTINGS_UI_START_TIME	2021-01-19 16:08:23
RESULTS_SEARCH_10_PARAMETERS_PARAGON_METHOD_SETTINGS_UI_MIN_UNUSED_PROTSCORE	0.0458
RESULTS_SEARCH_10_PARAMETERS_PARAGON_METHOD_SETTINGS_UI_PSPEP	TRUE
RESULTS_SEARCH_11_time_cpu	319380
RESULTS_SEARCH_11_time_duration	2890-06-03
RESULTS_SEARCH_11_version	5.0.1.4874
RESULTS_SEARCH_11_xml:id	SEARCH:1:637466692955257639_5
RESULTS_SEARCH_11_PARAMETERS_chemical_data_edited	FALSE
RESULTS_SEARCH_11_PARAMETERS_do_multiprecursor_search	TRUE
RESULTS_SEARCH_11_PARAMETERS_do_reverse_search	TRUE
RESULTS_SEARCH_11_PARAMETERS_max_quant_labels	35
RESULTS_SEARCH_11_PARAMETERS_maxresults	15
RESULTS_SEARCH_11_PARAMETERS_separate_searches	FALSE
RESULTS_SEARCH_11_PARAMETERS_MSTOLERANCE_type	dalton
RESULTS_SEARCH_11_PARAMETERS_MSTOLERANCE_value	0.05
RESULTS_SEARCH_11_PARAMETERS_MSMSTOLERANCE_type	dalton
RESULTS_SEARCH_11_PARAMETERS_MSMSTOLERANCE_value	0.1
RESULTS_SEARCH_11_PARAMETERS_MS_STANDARD_DEVIATION_type	dalton
RESULTS_SEARCH_11_PARAMETERS_MS_STANDARD_DEVIATION_value	0.0011
RESULTS_SEARCH_11_PARAMETERS_MSMS_STANDARD_DEVIATION_type	dalton
RESULTS_SEARCH_11_PARAMETERS_MSMS_STANDARD_DEVIATION_value	0.01
RESULTS_SEARCH_11_PARAMETERS_FASTA_filename	C:\AB SCIEX\ProteinPilot Data\SearchDatabases\uniprot-zebrafish_with_Clover.fasta
RESULTS_SEARCH_11_PARAMETERS_AUTO_CALIBRATION_ms	TRUE
RESULTS_SEARCH_11_PARAMETERS_AUTO_CALIBRATION_msexport	FALSE
RESULTS_SEARCH_11_PARAMETERS_AUTO_CALIBRATION_msms	TRUE
RESULTS_SEARCH_11_PARAMETERS_AUTO_CALIBRATION_msmstolsdratio	2.75
RESULTS_SEARCH_11_PARAMETERS_AUTO_CALIBRATION_mstolsdratio	7
RESULTS_SEARCH_11_PARAMETERS_AUTO_CALIBRATION_squareroot	TRUE
RESULTS_SEARCH_11_PARAMETERS_AUTO_CALIBRATION_type	dalton
RESULTS_SEARCH_11_PARAMETERS_AUTO_CALIBRATION_MCP_d_s_s_f	0.0666667
RESULTS_SEARCH_11_PARAMETERS_AUTO_CALIBRATION_MCP_d_s_w_f	3
RESULTS_SEARCH_11_PARAMETERS_AUTO_CALIBRATION_MCP_m_f_r_mbc	200
RESULTS_SEARCH_11_PARAMETERS_AUTO_CALIBRATION_MCP_m_m_c	10
RESULTS_SEARCH_11_PARAMETERS_AUTO_CALIBRATION_MCP_m_m_f_s	0.25
RESULTS_SEARCH_11_PARAMETERS_AUTO_CALIBRATION_MCP_m_m_p_f	0.33
RESULTS_SEARCH_11_PARAMETERS_AUTO_CALIBRATION_MCP_m_m_p_rms_f	1
RESULTS_SEARCH_11_PARAMETERS_AUTO_CALIBRATION_MCP_m_p_t_f	1
RESULTS_SEARCH_11_PARAMETERS_AUTO_CALIBRATION_MCP_m_r_h_n_b	15
RESULTS_SEARCH_11_PARAMETERS_AUTO_CALIBRATION_MCP_m_z_n_s	99
RESULTS_SEARCH_11_PARAMETERS_AUTO_CALIBRATION_MCP_m_z_s_mn_f_r	0.0666667
RESULTS_SEARCH_11_PARAMETERS_AUTO_CALIBRATION_MCP_m_z_s_mx_f_r	0.1
RESULTS_SEARCH_11_PARAMETERS_MAX_PRECURSORS_FRAGLET	5
RESULTS_SEARCH_11_PARAMETERS_MAX_PRECURSORS_TAGLET	1
RESULTS_SEARCH_11_PARAMETERS_PRECURSORS_DR_FRAGLET	10
RESULTS_SEARCH_11_PARAMETERS_PRECURSORS_DR_TAGLET	3
RESULTS_SEARCH_11_PARAMETERS_DEFAULT_CHARGE_STATE_1_charge	2
RESULTS_SEARCH_11_PARAMETERS_DEFAULT_CHARGE_STATE_1_probability	1
RESULTS_SEARCH_11_PARAMETERS_DEFAULT_CHARGE_STATE_2_charge	3
RESULTS_SEARCH_11_PARAMETERS_DEFAULT_CHARGE_STATE_2_probability	1
RESULTS_SEARCH_11_PARAMETERS_DEFAULT_CHARGE_STATE_3_charge	4
RESULTS_SEARCH_11_PARAMETERS_DEFAULT_CHARGE_STATE_3_probability	1
RESULTS_SEARCH_11_PARAMETERS_VERSION	5.0.1.0, 4895
RESULTS_SEARCH_11_PARAMETERS_PARAGON_VERSION	5.0.1.0, 4874
RESULTS_SEARCH_11_PARAMETERS_APPLICATION	ProteinPilot(tm) Software
RESULTS_SEARCH_11_PARAMETERS_PROGROUP_alternativedispositionmaximumfoldprobabilitydrop	100
RESULTS_SEARCH_11_PARAMETERS_PROGROUP_alternativedispositionmaximumfoldscoredrop	2
RESULTS_SEARCH_11_PARAMETERS_PROGROUP_autodiscordantpeptidethreshold	0.3
RESULTS_SEARCH_11_PARAMETERS_PROGROUP_bayesconfidencecalclulation	TRUE
RESULTS_SEARCH_11_PARAMETERS_PROGROUP_calibrateconfidence	TRUE
RESULTS_SEARCH_11_PARAMETERS_PROGROUP_compresspeptides	FALSE
RESULTS_SEARCH_11_PARAMETERS_PROGROUP_confidencepercentthresholdforexcludingothersfromquant	15
RESULTS_SEARCH_11_PARAMETERS_PROGROUP_confidencepercentthresholdforincludingselfinquant	15
RESULTS_SEARCH_11_PARAMETERS_PROGROUP_donotstoremspeaklists	FALSE
RESULTS_SEARCH_11_PARAMETERS_PROGROUP_fasta	C:\AB SCIEX\ProteinPilot Data\SearchDatabases\uniprot-zebrafish_with_Clover.fasta
RESULTS_SEARCH_11_PARAMETERS_PROGROUP_featuregroupminpepconf	0.66
RESULTS_SEARCH_11_PARAMETERS_PROGROUP_featuregroupminups	0.47
RESULTS_SEARCH_11_PARAMETERS_PROGROUP_focusingintersection	4
RESULTS_SEARCH_11_PARAMETERS_PROGROUP_focusingminimummatchconfidence	0.1
RESULTS_SEARCH_11_PARAMETERS_PROGROUP_focusingminunusedprotscore	0.1
RESULTS_SEARCH_11_PARAMETERS_PROGROUP_focusingsubsetcutoff	6
RESULTS_SEARCH_11_PARAMETERS_PROGROUP_intersection	1.3
RESULTS_SEARCH_11_PARAMETERS_PROGROUP_minimummatchconfidencecutoff	0.001
RESULTS_SEARCH_11_PARAMETERS_PROGROUP_minunusedprotscore	0.0458
RESULTS_SEARCH_11_PARAMETERS_PROGROUP_subsetcutoff	2
RESULTS_SEARCH_11_PARAMETERS_PROGROUP_unusedprotscorethresholdforexcludingothersfromquant	1.3
RESULTS_SEARCH_11_PARAMETERS_PEAKLIST_count	2690
RESULTS_SEARCH_11_PARAMETERS_PEAKLIST_filenumber	5
RESULTS_SEARCH_11_PARAMETERS_PEAKLIST_original_count	2690
RESULTS_SEARCH_11_PARAMETERS_PEAKLIST_originalfilename	C:\AB SCIEX\ProteinPilot Data\Results\Albert\ZX 20200624 6600\ZX 20200624 C4A 5.wiff
RESULTS_SEARCH_11_PARAMETERS_PEAKLIST_partnumber	6
RESULTS_SEARCH_11_PARAMETERS_QUANT_TYPE_background_correction	FALSE
RESULTS_SEARCH_11_PARAMETERS_QUANT_TYPE_bias_correction	TRUE
RESULTS_SEARCH_11_PARAMETERS_QUANT_TYPE_keep_extreme_peptides_over_fraction	0
RESULTS_SEARCH_11_PARAMETERS_QUANT_TYPE_low_confidence_check	TRUE
RESULTS_SEARCH_11_PARAMETERS_QUANT_TYPE_low_intensity_check	TRUE
RESULTS_SEARCH_11_PARAMETERS_QUANT_TYPE_median_statistic	TRUE
RESULTS_SEARCH_11_PARAMETERS_QUANT_TYPE_mod_check	TRUE
RESULTS_SEARCH_11_PARAMETERS_QUANT_TYPE_quant_threshold	-1
RESULTS_SEARCH_11_PARAMETERS_QUANT_TYPE_quant_threshold_sn	9
RESULTS_SEARCH_11_PARAMETERS_QUANT_TYPE_separate_searches	FALSE
RESULTS_SEARCH_11_PARAMETERS_QUANT_TYPE_shared_msms_check	TRUE
RESULTS_SEARCH_11_PARAMETERS_PARAGON_METHOD_SETTINGS_UI_SAMPLE_TYPE	Identification
RESULTS_SEARCH_11_PARAMETERS_PARAGON_METHOD_SETTINGS_UI_CYS_ALKYLATION	Iodoacetamide w other Cys mods possible
RESULTS_SEARCH_11_PARAMETERS_PARAGON_METHOD_SETTINGS_UI_DIGESTION	Trypsin + Lys C
RESULTS_SEARCH_11_PARAMETERS_PARAGON_METHOD_SETTINGS_UI_SPECIAL_FACTOR	Gel-based ID
RESULTS_SEARCH_11_PARAMETERS_PARAGON_METHOD_SETTINGS_UI_INSTRUMENT	TripleTOF 6600
RESULTS_SEARCH_11_PARAMETERS_PARAGON_METHOD_SETTINGS_UI_SEARCH_EFFORT	Thorough
RESULTS_SEARCH_11_PARAMETERS_PARAGON_METHOD_SETTINGS_UI_USER_NAME	IMB-MASS02\massuser
RESULTS_SEARCH_11_PARAMETERS_PARAGON_METHOD_SETTINGS_UI_MACHINE_NAME	IMB-MASS02
RESULTS_SEARCH_11_PARAMETERS_PARAGON_METHOD_SETTINGS_UI_SEARCH_ID	6.37467e+17
RESULTS_SEARCH_11_PARAMETERS_PARAGON_METHOD_SETTINGS_UI_START_TIME	2021-01-19 16:08:23
RESULTS_SEARCH_11_PARAMETERS_PARAGON_METHOD_SETTINGS_UI_MIN_UNUSED_PROTSCORE	0.0458
RESULTS_SEARCH_11_PARAMETERS_PARAGON_METHOD_SETTINGS_UI_PSPEP	TRUE
RESULTS_SEARCH_12_time_cpu	274842
RESULTS_SEARCH_12_time_duration	315912
RESULTS_SEARCH_12_version	5.0.1.4874
RESULTS_SEARCH_12_xml:id	SEARCH:2:637466692955257639_5
RESULTS_SEARCH_12_PARAMETERS_chemical_data_edited	FALSE
RESULTS_SEARCH_12_PARAMETERS_do_multiprecursor_search	TRUE
RESULTS_SEARCH_12_PARAMETERS_do_reverse_search	TRUE
RESULTS_SEARCH_12_PARAMETERS_max_quant_labels	35
RESULTS_SEARCH_12_PARAMETERS_maxresults	15
RESULTS_SEARCH_12_PARAMETERS_separate_searches	FALSE
RESULTS_SEARCH_12_PARAMETERS_MSTOLERANCE_type	dalton
RESULTS_SEARCH_12_PARAMETERS_MSTOLERANCE_value	0.05
RESULTS_SEARCH_12_PARAMETERS_MSMSTOLERANCE_type	dalton
RESULTS_SEARCH_12_PARAMETERS_MSMSTOLERANCE_value	0.1
RESULTS_SEARCH_12_PARAMETERS_MS_STANDARD_DEVIATION_type	dalton
RESULTS_SEARCH_12_PARAMETERS_MS_STANDARD_DEVIATION_value	0.0011
RESULTS_SEARCH_12_PARAMETERS_MSMS_STANDARD_DEVIATION_type	dalton
RESULTS_SEARCH_12_PARAMETERS_MSMS_STANDARD_DEVIATION_value	0.01
RESULTS_SEARCH_12_PARAMETERS_FASTA_filename	C:\AB SCIEX\ProteinPilot Data\SearchDatabases\uniprot-zebrafish_with_Clover.fasta
RESULTS_SEARCH_12_PARAMETERS_AUTO_CALIBRATION_ms	TRUE
RESULTS_SEARCH_12_PARAMETERS_AUTO_CALIBRATION_msexport	FALSE
RESULTS_SEARCH_12_PARAMETERS_AUTO_CALIBRATION_msms	TRUE
RESULTS_SEARCH_12_PARAMETERS_AUTO_CALIBRATION_msmstolsdratio	2.75
RESULTS_SEARCH_12_PARAMETERS_AUTO_CALIBRATION_mstolsdratio	7
RESULTS_SEARCH_12_PARAMETERS_AUTO_CALIBRATION_squareroot	TRUE
RESULTS_SEARCH_12_PARAMETERS_AUTO_CALIBRATION_type	dalton
RESULTS_SEARCH_12_PARAMETERS_AUTO_CALIBRATION_MCP_d_s_s_f	0.0666667
RESULTS_SEARCH_12_PARAMETERS_AUTO_CALIBRATION_MCP_d_s_w_f	3
RESULTS_SEARCH_12_PARAMETERS_AUTO_CALIBRATION_MCP_m_f_r_mbc	200
RESULTS_SEARCH_12_PARAMETERS_AUTO_CALIBRATION_MCP_m_m_c	10
RESULTS_SEARCH_12_PARAMETERS_AUTO_CALIBRATION_MCP_m_m_f_s	0.25
RESULTS_SEARCH_12_PARAMETERS_AUTO_CALIBRATION_MCP_m_m_p_f	0.33
RESULTS_SEARCH_12_PARAMETERS_AUTO_CALIBRATION_MCP_m_m_p_rms_f	1
RESULTS_SEARCH_12_PARAMETERS_AUTO_CALIBRATION_MCP_m_p_t_f	1
RESULTS_SEARCH_12_PARAMETERS_AUTO_CALIBRATION_MCP_m_r_h_n_b	15
RESULTS_SEARCH_12_PARAMETERS_AUTO_CALIBRATION_MCP_m_z_n_s	99
RESULTS_SEARCH_12_PARAMETERS_AUTO_CALIBRATION_MCP_m_z_s_mn_f_r	0.0666667
RESULTS_SEARCH_12_PARAMETERS_AUTO_CALIBRATION_MCP_m_z_s_mx_f_r	0.1
RESULTS_SEARCH_12_PARAMETERS_MAX_PRECURSORS_FRAGLET	5
RESULTS_SEARCH_12_PARAMETERS_MAX_PRECURSORS_TAGLET	1
RESULTS_SEARCH_12_PARAMETERS_PRECURSORS_DR_FRAGLET	1900-01-10
RESULTS_SEARCH_12_PARAMETERS_PRECURSORS_DR_TAGLET	3
RESULTS_SEARCH_12_PARAMETERS_DEFAULT_CHARGE_STATE_1_charge	2
RESULTS_SEARCH_12_PARAMETERS_DEFAULT_CHARGE_STATE_1_probability	1
RESULTS_SEARCH_12_PARAMETERS_DEFAULT_CHARGE_STATE_2_charge	3
RESULTS_SEARCH_12_PARAMETERS_DEFAULT_CHARGE_STATE_2_probability	1
RESULTS_SEARCH_12_PARAMETERS_DEFAULT_CHARGE_STATE_3_charge	4
RESULTS_SEARCH_12_PARAMETERS_DEFAULT_CHARGE_STATE_3_probability	1
RESULTS_SEARCH_12_PARAMETERS_VERSION	5.0.1.0, 4895
RESULTS_SEARCH_12_PARAMETERS_PARAGON_VERSION	5.0.1.0, 4874
RESULTS_SEARCH_12_PARAMETERS_APPLICATION	ProteinPilot(tm) Software
RESULTS_SEARCH_12_PARAMETERS_PROGROUP_alternativedispositionmaximumfoldprobabilitydrop	100
RESULTS_SEARCH_12_PARAMETERS_PROGROUP_alternativedispositionmaximumfoldscoredrop	2
RESULTS_SEARCH_12_PARAMETERS_PROGROUP_autodiscordantpeptidethreshold	0.3
RESULTS_SEARCH_12_PARAMETERS_PROGROUP_bayesconfidencecalclulation	TRUE
RESULTS_SEARCH_12_PARAMETERS_PROGROUP_calibrateconfidence	TRUE
RESULTS_SEARCH_12_PARAMETERS_PROGROUP_compresspeptides	FALSE
RESULTS_SEARCH_12_PARAMETERS_PROGROUP_confidencepercentthresholdforexcludingothersfromquant	15
RESULTS_SEARCH_12_PARAMETERS_PROGROUP_confidencepercentthresholdforincludingselfinquant	15
RESULTS_SEARCH_12_PARAMETERS_PROGROUP_donotstoremspeaklists	FALSE
RESULTS_SEARCH_12_PARAMETERS_PROGROUP_fasta	C:\AB SCIEX\ProteinPilot Data\SearchDatabases\uniprot-zebrafish_with_Clover.fasta
RESULTS_SEARCH_12_PARAMETERS_PROGROUP_featuregroupminpepconf	0.66
RESULTS_SEARCH_12_PARAMETERS_PROGROUP_featuregroupminups	11:16:48
RESULTS_SEARCH_12_PARAMETERS_PROGROUP_focusingintersection	4
RESULTS_SEARCH_12_PARAMETERS_PROGROUP_focusingminimummatchconfidence	0.1
RESULTS_SEARCH_12_PARAMETERS_PROGROUP_focusingminunusedprotscore	02:24:00
RESULTS_SEARCH_12_PARAMETERS_PROGROUP_focusingsubsetcutoff	6
RESULTS_SEARCH_12_PARAMETERS_PROGROUP_intersection	1.3
RESULTS_SEARCH_12_PARAMETERS_PROGROUP_minimummatchconfidencecutoff	0.001
RESULTS_SEARCH_12_PARAMETERS_PROGROUP_minunusedprotscore	0.0458
RESULTS_SEARCH_12_PARAMETERS_PROGROUP_subsetcutoff	2
RESULTS_SEARCH_12_PARAMETERS_PROGROUP_unusedprotscorethresholdforexcludingothersfromquant	1.3
RESULTS_SEARCH_12_PARAMETERS_PEAKLIST_count	2690
RESULTS_SEARCH_12_PARAMETERS_PEAKLIST_filenumber	5
RESULTS_SEARCH_12_PARAMETERS_PEAKLIST_original_count	2690
RESULTS_SEARCH_12_PARAMETERS_PEAKLIST_originalfilename	C:\AB SCIEX\ProteinPilot Data\Results\Albert\ZX 20200624 6600\ZX 20200624 C4A 5.wiff
RESULTS_SEARCH_12_PARAMETERS_PEAKLIST_partnumber	6
RESULTS_SEARCH_12_PARAMETERS_QUANT_TYPE_background_correction	FALSE
RESULTS_SEARCH_12_PARAMETERS_QUANT_TYPE_bias_correction	TRUE
RESULTS_SEARCH_12_PARAMETERS_QUANT_TYPE_keep_extreme_peptides_over_fraction	0
RESULTS_SEARCH_12_PARAMETERS_QUANT_TYPE_low_confidence_check	TRUE
RESULTS_SEARCH_12_PARAMETERS_QUANT_TYPE_low_intensity_check	TRUE
RESULTS_SEARCH_12_PARAMETERS_QUANT_TYPE_median_statistic	TRUE
RESULTS_SEARCH_12_PARAMETERS_QUANT_TYPE_mod_check	TRUE
RESULTS_SEARCH_12_PARAMETERS_QUANT_TYPE_quant_threshold	-1
RESULTS_SEARCH_12_PARAMETERS_QUANT_TYPE_quant_threshold_sn	9
RESULTS_SEARCH_12_PARAMETERS_QUANT_TYPE_separate_searches	FALSE
RESULTS_SEARCH_12_PARAMETERS_QUANT_TYPE_shared_msms_check	TRUE
RESULTS_SEARCH_12_PARAMETERS_PARAGON_METHOD_SETTINGS_UI_SAMPLE_TYPE	Identification
RESULTS_SEARCH_12_PARAMETERS_PARAGON_METHOD_SETTINGS_UI_CYS_ALKYLATION	Iodoacetamide w other Cys mods possible
RESULTS_SEARCH_12_PARAMETERS_PARAGON_METHOD_SETTINGS_UI_DIGESTION	Trypsin + Lys C
RESULTS_SEARCH_12_PARAMETERS_PARAGON_METHOD_SETTINGS_UI_SPECIAL_FACTOR	Gel-based ID
RESULTS_SEARCH_12_PARAMETERS_PARAGON_METHOD_SETTINGS_UI_INSTRUMENT	TripleTOF 6600
RESULTS_SEARCH_12_PARAMETERS_PARAGON_METHOD_SETTINGS_UI_SEARCH_EFFORT	Thorough
RESULTS_SEARCH_12_PARAMETERS_PARAGON_METHOD_SETTINGS_UI_USER_NAME	IMB-MASS02\massuser
RESULTS_SEARCH_12_PARAMETERS_PARAGON_METHOD_SETTINGS_UI_MACHINE_NAME	IMB-MASS02
RESULTS_SEARCH_12_PARAMETERS_PARAGON_METHOD_SETTINGS_UI_SEARCH_ID	6.37467e+17
RESULTS_SEARCH_12_PARAMETERS_PARAGON_METHOD_SETTINGS_UI_START_TIME	2021-01-19 16:08:23
RESULTS_SEARCH_12_PARAMETERS_PARAGON_METHOD_SETTINGS_UI_MIN_UNUSED_PROTSCORE	0.0458
RESULTS_SEARCH_12_PARAMETERS_PARAGON_METHOD_SETTINGS_UI_PSPEP	TRUE
RESULTS_SEARCH_13_time_cpu	332484
RESULTS_SEARCH_13_time_duration	393057
RESULTS_SEARCH_13_version	5.0.1.4874
RESULTS_SEARCH_13_xml:id	SEARCH:1:637466692955257639_6
RESULTS_SEARCH_13_PARAMETERS_chemical_data_edited	FALSE
RESULTS_SEARCH_13_PARAMETERS_do_multiprecursor_search	TRUE
RESULTS_SEARCH_13_PARAMETERS_do_reverse_search	TRUE
RESULTS_SEARCH_13_PARAMETERS_max_quant_labels	35
RESULTS_SEARCH_13_PARAMETERS_maxresults	15
RESULTS_SEARCH_13_PARAMETERS_separate_searches	FALSE
RESULTS_SEARCH_13_PARAMETERS_MSTOLERANCE_type	dalton
RESULTS_SEARCH_13_PARAMETERS_MSTOLERANCE_value	0.05
RESULTS_SEARCH_13_PARAMETERS_MSMSTOLERANCE_type	dalton
RESULTS_SEARCH_13_PARAMETERS_MSMSTOLERANCE_value	0.1
RESULTS_SEARCH_13_PARAMETERS_MS_STANDARD_DEVIATION_type	dalton
RESULTS_SEARCH_13_PARAMETERS_MS_STANDARD_DEVIATION_value	0.0011
RESULTS_SEARCH_13_PARAMETERS_MSMS_STANDARD_DEVIATION_type	dalton
RESULTS_SEARCH_13_PARAMETERS_MSMS_STANDARD_DEVIATION_value	0.01
RESULTS_SEARCH_13_PARAMETERS_FASTA_filename	C:\AB SCIEX\ProteinPilot Data\SearchDatabases\uniprot-zebrafish_with_Clover.fasta
RESULTS_SEARCH_13_PARAMETERS_AUTO_CALIBRATION_ms	TRUE
RESULTS_SEARCH_13_PARAMETERS_AUTO_CALIBRATION_msexport	FALSE
RESULTS_SEARCH_13_PARAMETERS_AUTO_CALIBRATION_msms	TRUE
RESULTS_SEARCH_13_PARAMETERS_AUTO_CALIBRATION_msmstolsdratio	2.75
RESULTS_SEARCH_13_PARAMETERS_AUTO_CALIBRATION_mstolsdratio	7
RESULTS_SEARCH_13_PARAMETERS_AUTO_CALIBRATION_squareroot	TRUE
RESULTS_SEARCH_13_PARAMETERS_AUTO_CALIBRATION_type	dalton
RESULTS_SEARCH_13_PARAMETERS_AUTO_CALIBRATION_MCP_d_s_s_f	0.0666667
RESULTS_SEARCH_13_PARAMETERS_AUTO_CALIBRATION_MCP_d_s_w_f	3
RESULTS_SEARCH_13_PARAMETERS_AUTO_CALIBRATION_MCP_m_f_r_mbc	200
RESULTS_SEARCH_13_PARAMETERS_AUTO_CALIBRATION_MCP_m_m_c	1900-01-10
RESULTS_SEARCH_13_PARAMETERS_AUTO_CALIBRATION_MCP_m_m_f_s	0.25
RESULTS_SEARCH_13_PARAMETERS_AUTO_CALIBRATION_MCP_m_m_p_f	0.33
RESULTS_SEARCH_13_PARAMETERS_AUTO_CALIBRATION_MCP_m_m_p_rms_f	1
RESULTS_SEARCH_13_PARAMETERS_AUTO_CALIBRATION_MCP_m_p_t_f	1
RESULTS_SEARCH_13_PARAMETERS_AUTO_CALIBRATION_MCP_m_r_h_n_b	15
RESULTS_SEARCH_13_PARAMETERS_AUTO_CALIBRATION_MCP_m_z_n_s	99
RESULTS_SEARCH_13_PARAMETERS_AUTO_CALIBRATION_MCP_m_z_s_mn_f_r	0.0666667
RESULTS_SEARCH_13_PARAMETERS_AUTO_CALIBRATION_MCP_m_z_s_mx_f_r	0.1
RESULTS_SEARCH_13_PARAMETERS_MAX_PRECURSORS_FRAGLET	5
RESULTS_SEARCH_13_PARAMETERS_MAX_PRECURSORS_TAGLET	1
RESULTS_SEARCH_13_PARAMETERS_PRECURSORS_DR_FRAGLET	10
RESULTS_SEARCH_13_PARAMETERS_PRECURSORS_DR_TAGLET	3
RESULTS_SEARCH_13_PARAMETERS_DEFAULT_CHARGE_STATE_1_charge	2
RESULTS_SEARCH_13_PARAMETERS_DEFAULT_CHARGE_STATE_1_probability	1
RESULTS_SEARCH_13_PARAMETERS_DEFAULT_CHARGE_STATE_2_charge	3
RESULTS_SEARCH_13_PARAMETERS_DEFAULT_CHARGE_STATE_2_probability	1
RESULTS_SEARCH_13_PARAMETERS_DEFAULT_CHARGE_STATE_3_charge	4
RESULTS_SEARCH_13_PARAMETERS_DEFAULT_CHARGE_STATE_3_probability	1
RESULTS_SEARCH_13_PARAMETERS_VERSION	5.0.1.0, 4895
RESULTS_SEARCH_13_PARAMETERS_PARAGON_VERSION	5.0.1.0, 4874
RESULTS_SEARCH_13_PARAMETERS_APPLICATION	ProteinPilot(tm) Software
RESULTS_SEARCH_13_PARAMETERS_PROGROUP_alternativedispositionmaximumfoldprobabilitydrop	100
RESULTS_SEARCH_13_PARAMETERS_PROGROUP_alternativedispositionmaximumfoldscoredrop	2
RESULTS_SEARCH_13_PARAMETERS_PROGROUP_autodiscordantpeptidethreshold	0.3
RESULTS_SEARCH_13_PARAMETERS_PROGROUP_bayesconfidencecalclulation	TRUE
RESULTS_SEARCH_13_PARAMETERS_PROGROUP_calibrateconfidence	TRUE
RESULTS_SEARCH_13_PARAMETERS_PROGROUP_compresspeptides	FALSE
RESULTS_SEARCH_13_PARAMETERS_PROGROUP_confidencepercentthresholdforexcludingothersfromquant	1900-01-15
RESULTS_SEARCH_13_PARAMETERS_PROGROUP_confidencepercentthresholdforincludingselfinquant	15
RESULTS_SEARCH_13_PARAMETERS_PROGROUP_donotstoremspeaklists	FALSE
RESULTS_SEARCH_13_PARAMETERS_PROGROUP_fasta	C:\AB SCIEX\ProteinPilot Data\SearchDatabases\uniprot-zebrafish_with_Clover.fasta
RESULTS_SEARCH_13_PARAMETERS_PROGROUP_featuregroupminpepconf	0.66
RESULTS_SEARCH_13_PARAMETERS_PROGROUP_featuregroupminups	0.47
RESULTS_SEARCH_13_PARAMETERS_PROGROUP_focusingintersection	4
RESULTS_SEARCH_13_PARAMETERS_PROGROUP_focusingminimummatchconfidence	0.1
RESULTS_SEARCH_13_PARAMETERS_PROGROUP_focusingminunusedprotscore	0.1
RESULTS_SEARCH_13_PARAMETERS_PROGROUP_focusingsubsetcutoff	6
RESULTS_SEARCH_13_PARAMETERS_PROGROUP_intersection	1.3
RESULTS_SEARCH_13_PARAMETERS_PROGROUP_minimummatchconfidencecutoff	0.001
RESULTS_SEARCH_13_PARAMETERS_PROGROUP_minunusedprotscore	0.0458
RESULTS_SEARCH_13_PARAMETERS_PROGROUP_subsetcutoff	2
RESULTS_SEARCH_13_PARAMETERS_PROGROUP_unusedprotscorethresholdforexcludingothersfromquant	1.3
RESULTS_SEARCH_13_PARAMETERS_PEAKLIST_count	2736
RESULTS_SEARCH_13_PARAMETERS_PEAKLIST_filenumber	6
RESULTS_SEARCH_13_PARAMETERS_PEAKLIST_original_count	2736
RESULTS_SEARCH_13_PARAMETERS_PEAKLIST_originalfilename	C:\AB SCIEX\ProteinPilot Data\Results\Albert\ZX 20200624 6600\ZX 20200624 C4A 6.wiff
RESULTS_SEARCH_13_PARAMETERS_PEAKLIST_partnumber	7
RESULTS_SEARCH_13_PARAMETERS_QUANT_TYPE_background_correction	FALSE
RESULTS_SEARCH_13_PARAMETERS_QUANT_TYPE_bias_correction	TRUE
RESULTS_SEARCH_13_PARAMETERS_QUANT_TYPE_keep_extreme_peptides_over_fraction	0
RESULTS_SEARCH_13_PARAMETERS_QUANT_TYPE_low_confidence_check	TRUE
RESULTS_SEARCH_13_PARAMETERS_QUANT_TYPE_low_intensity_check	TRUE
RESULTS_SEARCH_13_PARAMETERS_QUANT_TYPE_median_statistic	TRUE
RESULTS_SEARCH_13_PARAMETERS_QUANT_TYPE_mod_check	TRUE
RESULTS_SEARCH_13_PARAMETERS_QUANT_TYPE_quant_threshold	-1
RESULTS_SEARCH_13_PARAMETERS_QUANT_TYPE_quant_threshold_sn	9
RESULTS_SEARCH_13_PARAMETERS_QUANT_TYPE_separate_searches	FALSE
RESULTS_SEARCH_13_PARAMETERS_QUANT_TYPE_shared_msms_check	TRUE
RESULTS_SEARCH_13_PARAMETERS_PARAGON_METHOD_SETTINGS_UI_SAMPLE_TYPE	Identification
RESULTS_SEARCH_13_PARAMETERS_PARAGON_METHOD_SETTINGS_UI_CYS_ALKYLATION	Iodoacetamide w other Cys mods possible
RESULTS_SEARCH_13_PARAMETERS_PARAGON_METHOD_SETTINGS_UI_DIGESTION	Trypsin + Lys C
RESULTS_SEARCH_13_PARAMETERS_PARAGON_METHOD_SETTINGS_UI_SPECIAL_FACTOR	Gel-based ID
RESULTS_SEARCH_13_PARAMETERS_PARAGON_METHOD_SETTINGS_UI_INSTRUMENT	TripleTOF 6600
RESULTS_SEARCH_13_PARAMETERS_PARAGON_METHOD_SETTINGS_UI_SEARCH_EFFORT	Thorough
RESULTS_SEARCH_13_PARAMETERS_PARAGON_METHOD_SETTINGS_UI_USER_NAME	IMB-MASS02\massuser
RESULTS_SEARCH_13_PARAMETERS_PARAGON_METHOD_SETTINGS_UI_MACHINE_NAME	IMB-MASS02
RESULTS_SEARCH_13_PARAMETERS_PARAGON_METHOD_SETTINGS_UI_SEARCH_ID	6.37467e+17
RESULTS_SEARCH_13_PARAMETERS_PARAGON_METHOD_SETTINGS_UI_START_TIME	2021-01-19 16:08:23
RESULTS_SEARCH_13_PARAMETERS_PARAGON_METHOD_SETTINGS_UI_MIN_UNUSED_PROTSCORE	0.0458
RESULTS_SEARCH_13_PARAMETERS_PARAGON_METHOD_SETTINGS_UI_PSPEP	TRUE
RESULTS_SEARCH_14_time_cpu	441514
RESULTS_SEARCH_14_time_duration	596176
RESULTS_SEARCH_14_version	5.0.1.4874
RESULTS_SEARCH_14_xml:id	SEARCH:2:637466692955257639_6
RESULTS_SEARCH_14_PARAMETERS_chemical_data_edited	FALSE
RESULTS_SEARCH_14_PARAMETERS_do_multiprecursor_search	TRUE
RESULTS_SEARCH_14_PARAMETERS_do_reverse_search	TRUE
RESULTS_SEARCH_14_PARAMETERS_max_quant_labels	35
RESULTS_SEARCH_14_PARAMETERS_maxresults	15
RESULTS_SEARCH_14_PARAMETERS_separate_searches	FALSE
RESULTS_SEARCH_14_PARAMETERS_MSTOLERANCE_type	dalton
RESULTS_SEARCH_14_PARAMETERS_MSTOLERANCE_value	0.05
RESULTS_SEARCH_14_PARAMETERS_MSMSTOLERANCE_type	dalton
RESULTS_SEARCH_14_PARAMETERS_MSMSTOLERANCE_value	0.1
RESULTS_SEARCH_14_PARAMETERS_MS_STANDARD_DEVIATION_type	dalton
RESULTS_SEARCH_14_PARAMETERS_MS_STANDARD_DEVIATION_value	0.0011
RESULTS_SEARCH_14_PARAMETERS_MSMS_STANDARD_DEVIATION_type	dalton
RESULTS_SEARCH_14_PARAMETERS_MSMS_STANDARD_DEVIATION_value	0.01
RESULTS_SEARCH_14_PARAMETERS_FASTA_filename	C:\AB SCIEX\ProteinPilot Data\SearchDatabases\uniprot-zebrafish_with_Clover.fasta
RESULTS_SEARCH_14_PARAMETERS_AUTO_CALIBRATION_ms	TRUE
RESULTS_SEARCH_14_PARAMETERS_AUTO_CALIBRATION_msexport	FALSE
RESULTS_SEARCH_14_PARAMETERS_AUTO_CALIBRATION_msms	TRUE
RESULTS_SEARCH_14_PARAMETERS_AUTO_CALIBRATION_msmstolsdratio	2.75
RESULTS_SEARCH_14_PARAMETERS_AUTO_CALIBRATION_mstolsdratio	7
RESULTS_SEARCH_14_PARAMETERS_AUTO_CALIBRATION_squareroot	TRUE
RESULTS_SEARCH_14_PARAMETERS_AUTO_CALIBRATION_type	dalton
RESULTS_SEARCH_14_PARAMETERS_AUTO_CALIBRATION_MCP_d_s_s_f	0.0666667
RESULTS_SEARCH_14_PARAMETERS_AUTO_CALIBRATION_MCP_d_s_w_f	3
RESULTS_SEARCH_14_PARAMETERS_AUTO_CALIBRATION_MCP_m_f_r_mbc	200
RESULTS_SEARCH_14_PARAMETERS_AUTO_CALIBRATION_MCP_m_m_c	10
RESULTS_SEARCH_14_PARAMETERS_AUTO_CALIBRATION_MCP_m_m_f_s	0.25
RESULTS_SEARCH_14_PARAMETERS_AUTO_CALIBRATION_MCP_m_m_p_f	0.33
RESULTS_SEARCH_14_PARAMETERS_AUTO_CALIBRATION_MCP_m_m_p_rms_f	1
RESULTS_SEARCH_14_PARAMETERS_AUTO_CALIBRATION_MCP_m_p_t_f	1
RESULTS_SEARCH_14_PARAMETERS_AUTO_CALIBRATION_MCP_m_r_h_n_b	15
RESULTS_SEARCH_14_PARAMETERS_AUTO_CALIBRATION_MCP_m_z_n_s	99
RESULTS_SEARCH_14_PARAMETERS_AUTO_CALIBRATION_MCP_m_z_s_mn_f_r	0.0666667
RESULTS_SEARCH_14_PARAMETERS_AUTO_CALIBRATION_MCP_m_z_s_mx_f_r	0.1
RESULTS_SEARCH_14_PARAMETERS_MAX_PRECURSORS_FRAGLET	5
RESULTS_SEARCH_14_PARAMETERS_MAX_PRECURSORS_TAGLET	1
RESULTS_SEARCH_14_PARAMETERS_PRECURSORS_DR_FRAGLET	10
RESULTS_SEARCH_14_PARAMETERS_PRECURSORS_DR_TAGLET	3
RESULTS_SEARCH_14_PARAMETERS_DEFAULT_CHARGE_STATE_1_charge	2
RESULTS_SEARCH_14_PARAMETERS_DEFAULT_CHARGE_STATE_1_probability	1
RESULTS_SEARCH_14_PARAMETERS_DEFAULT_CHARGE_STATE_2_charge	3
RESULTS_SEARCH_14_PARAMETERS_DEFAULT_CHARGE_STATE_2_probability	1
RESULTS_SEARCH_14_PARAMETERS_DEFAULT_CHARGE_STATE_3_charge	4
RESULTS_SEARCH_14_PARAMETERS_DEFAULT_CHARGE_STATE_3_probability	1
RESULTS_SEARCH_14_PARAMETERS_VERSION	5.0.1.0, 4895
RESULTS_SEARCH_14_PARAMETERS_PARAGON_VERSION	5.0.1.0, 4874
RESULTS_SEARCH_14_PARAMETERS_APPLICATION	ProteinPilot(tm) Software
RESULTS_SEARCH_14_PARAMETERS_PROGROUP_alternativedispositionmaximumfoldprobabilitydrop	100
RESULTS_SEARCH_14_PARAMETERS_PROGROUP_alternativedispositionmaximumfoldscoredrop	2
RESULTS_SEARCH_14_PARAMETERS_PROGROUP_autodiscordantpeptidethreshold	0.3
RESULTS_SEARCH_14_PARAMETERS_PROGROUP_bayesconfidencecalclulation	TRUE
RESULTS_SEARCH_14_PARAMETERS_PROGROUP_calibrateconfidence	TRUE
RESULTS_SEARCH_14_PARAMETERS_PROGROUP_compresspeptides	FALSE
RESULTS_SEARCH_14_PARAMETERS_PROGROUP_confidencepercentthresholdforexcludingothersfromquant	15
RESULTS_SEARCH_14_PARAMETERS_PROGROUP_confidencepercentthresholdforincludingselfinquant	15
RESULTS_SEARCH_14_PARAMETERS_PROGROUP_donotstoremspeaklists	FALSE
RESULTS_SEARCH_14_PARAMETERS_PROGROUP_fasta	C:\AB SCIEX\ProteinPilot Data\SearchDatabases\uniprot-zebrafish_with_Clover.fasta
RESULTS_SEARCH_14_PARAMETERS_PROGROUP_featuregroupminpepconf	0.66
RESULTS_SEARCH_14_PARAMETERS_PROGROUP_featuregroupminups	0.47
RESULTS_SEARCH_14_PARAMETERS_PROGROUP_focusingintersection	4
RESULTS_SEARCH_14_PARAMETERS_PROGROUP_focusingminimummatchconfidence	0.1
RESULTS_SEARCH_14_PARAMETERS_PROGROUP_focusingminunusedprotscore	0.1
RESULTS_SEARCH_14_PARAMETERS_PROGROUP_focusingsubsetcutoff	6
RESULTS_SEARCH_14_PARAMETERS_PROGROUP_intersection	1.3
RESULTS_SEARCH_14_PARAMETERS_PROGROUP_minimummatchconfidencecutoff	0.001
RESULTS_SEARCH_14_PARAMETERS_PROGROUP_minunusedprotscore	01:05:57.120000
RESULTS_SEARCH_14_PARAMETERS_PROGROUP_subsetcutoff	2
RESULTS_SEARCH_14_PARAMETERS_PROGROUP_unusedprotscorethresholdforexcludingothersfromquant	1.3
RESULTS_SEARCH_14_PARAMETERS_PEAKLIST_count	2736
RESULTS_SEARCH_14_PARAMETERS_PEAKLIST_filenumber	6
RESULTS_SEARCH_14_PARAMETERS_PEAKLIST_original_count	1907-06-28
RESULTS_SEARCH_14_PARAMETERS_PEAKLIST_originalfilename	C:\AB SCIEX\ProteinPilot Data\Results\Albert\ZX 20200624 6600\ZX 20200624 C4A 6.wiff
RESULTS_SEARCH_14_PARAMETERS_PEAKLIST_partnumber	7
RESULTS_SEARCH_14_PARAMETERS_QUANT_TYPE_background_correction	FALSE
RESULTS_SEARCH_14_PARAMETERS_QUANT_TYPE_bias_correction	TRUE
RESULTS_SEARCH_14_PARAMETERS_QUANT_TYPE_keep_extreme_peptides_over_fraction	0
RESULTS_SEARCH_14_PARAMETERS_QUANT_TYPE_low_confidence_check	TRUE
RESULTS_SEARCH_14_PARAMETERS_QUANT_TYPE_low_intensity_check	TRUE
RESULTS_SEARCH_14_PARAMETERS_QUANT_TYPE_median_statistic	TRUE
RESULTS_SEARCH_14_PARAMETERS_QUANT_TYPE_mod_check	TRUE
RESULTS_SEARCH_14_PARAMETERS_QUANT_TYPE_quant_threshold	-1
RESULTS_SEARCH_14_PARAMETERS_QUANT_TYPE_quant_threshold_sn	9
RESULTS_SEARCH_14_PARAMETERS_QUANT_TYPE_separate_searches	FALSE
RESULTS_SEARCH_14_PARAMETERS_QUANT_TYPE_shared_msms_check	TRUE
RESULTS_SEARCH_14_PARAMETERS_PARAGON_METHOD_SETTINGS_UI_SAMPLE_TYPE	Identification
RESULTS_SEARCH_14_PARAMETERS_PARAGON_METHOD_SETTINGS_UI_CYS_ALKYLATION	Iodoacetamide w other Cys mods possible
RESULTS_SEARCH_14_PARAMETERS_PARAGON_METHOD_SETTINGS_UI_DIGESTION	Trypsin + Lys C
RESULTS_SEARCH_14_PARAMETERS_PARAGON_METHOD_SETTINGS_UI_SPECIAL_FACTOR	Gel-based ID
RESULTS_SEARCH_14_PARAMETERS_PARAGON_METHOD_SETTINGS_UI_INSTRUMENT	TripleTOF 6600
RESULTS_SEARCH_14_PARAMETERS_PARAGON_METHOD_SETTINGS_UI_SEARCH_EFFORT	Thorough
RESULTS_SEARCH_14_PARAMETERS_PARAGON_METHOD_SETTINGS_UI_USER_NAME	IMB-MASS02\massuser
RESULTS_SEARCH_14_PARAMETERS_PARAGON_METHOD_SETTINGS_UI_MACHINE_NAME	IMB-MASS02
RESULTS_SEARCH_14_PARAMETERS_PARAGON_METHOD_SETTINGS_UI_SEARCH_ID	6.37467e+17
RESULTS_SEARCH_14_PARAMETERS_PARAGON_METHOD_SETTINGS_UI_START_TIME	2021-01-19 16:08:23
RESULTS_SEARCH_14_PARAMETERS_PARAGON_METHOD_SETTINGS_UI_MIN_UNUSED_PROTSCORE	0.0458
RESULTS_SEARCH_14_PARAMETERS_PARAGON_METHOD_SETTINGS_UI_PSPEP	TRUE
RESULTS_SEARCH_15_time_cpu	2409-02-12
RESULTS_SEARCH_15_time_duration	205179
RESULTS_SEARCH_15_version	5.0.1.4874
RESULTS_SEARCH_15_xml:id	SEARCH:1:637466692955257639_7
RESULTS_SEARCH_15_PARAMETERS_chemical_data_edited	FALSE
RESULTS_SEARCH_15_PARAMETERS_do_multiprecursor_search	TRUE
RESULTS_SEARCH_15_PARAMETERS_do_reverse_search	TRUE
RESULTS_SEARCH_15_PARAMETERS_max_quant_labels	35
RESULTS_SEARCH_15_PARAMETERS_maxresults	15
RESULTS_SEARCH_15_PARAMETERS_separate_searches	FALSE
RESULTS_SEARCH_15_PARAMETERS_MSTOLERANCE_type	dalton
RESULTS_SEARCH_15_PARAMETERS_MSTOLERANCE_value	0.05
RESULTS_SEARCH_15_PARAMETERS_MSMSTOLERANCE_type	dalton
RESULTS_SEARCH_15_PARAMETERS_MSMSTOLERANCE_value	0.1
RESULTS_SEARCH_15_PARAMETERS_MS_STANDARD_DEVIATION_type	dalton
RESULTS_SEARCH_15_PARAMETERS_MS_STANDARD_DEVIATION_value	0.0011
RESULTS_SEARCH_15_PARAMETERS_MSMS_STANDARD_DEVIATION_type	dalton
RESULTS_SEARCH_15_PARAMETERS_MSMS_STANDARD_DEVIATION_value	0.01
RESULTS_SEARCH_15_PARAMETERS_FASTA_filename	C:\AB SCIEX\ProteinPilot Data\SearchDatabases\uniprot-zebrafish_with_Clover.fasta
RESULTS_SEARCH_15_PARAMETERS_AUTO_CALIBRATION_ms	TRUE
RESULTS_SEARCH_15_PARAMETERS_AUTO_CALIBRATION_msexport	FALSE
RESULTS_SEARCH_15_PARAMETERS_AUTO_CALIBRATION_msms	TRUE
RESULTS_SEARCH_15_PARAMETERS_AUTO_CALIBRATION_msmstolsdratio	2.75
RESULTS_SEARCH_15_PARAMETERS_AUTO_CALIBRATION_mstolsdratio	7
RESULTS_SEARCH_15_PARAMETERS_AUTO_CALIBRATION_squareroot	TRUE
RESULTS_SEARCH_15_PARAMETERS_AUTO_CALIBRATION_type	dalton
RESULTS_SEARCH_15_PARAMETERS_AUTO_CALIBRATION_MCP_d_s_s_f	0.0666667
RESULTS_SEARCH_15_PARAMETERS_AUTO_CALIBRATION_MCP_d_s_w_f	3
RESULTS_SEARCH_15_PARAMETERS_AUTO_CALIBRATION_MCP_m_f_r_mbc	200
RESULTS_SEARCH_15_PARAMETERS_AUTO_CALIBRATION_MCP_m_m_c	10
RESULTS_SEARCH_15_PARAMETERS_AUTO_CALIBRATION_MCP_m_m_f_s	0.25
RESULTS_SEARCH_15_PARAMETERS_AUTO_CALIBRATION_MCP_m_m_p_f	0.33
RESULTS_SEARCH_15_PARAMETERS_AUTO_CALIBRATION_MCP_m_m_p_rms_f	1
RESULTS_SEARCH_15_PARAMETERS_AUTO_CALIBRATION_MCP_m_p_t_f	1
RESULTS_SEARCH_15_PARAMETERS_AUTO_CALIBRATION_MCP_m_r_h_n_b	15
RESULTS_SEARCH_15_PARAMETERS_AUTO_CALIBRATION_MCP_m_z_n_s	99
RESULTS_SEARCH_15_PARAMETERS_AUTO_CALIBRATION_MCP_m_z_s_mn_f_r	0.0666667
RESULTS_SEARCH_15_PARAMETERS_AUTO_CALIBRATION_MCP_m_z_s_mx_f_r	0.1
RESULTS_SEARCH_15_PARAMETERS_MS_AUTO_CALIBRATION_OUT_avres	-1.00371e-10
RESULTS_SEARCH_15_PARAMETERS_MS_AUTO_CALIBRATION_OUT_c0	-5.26354e-05
RESULTS_SEARCH_15_PARAMETERS_MS_AUTO_CALIBRATION_OUT_c1minus1	9.67474e-07
RESULTS_SEARCH_15_PARAMETERS_MS_AUTO_CALIBRATION_OUT_c2	0
RESULTS_SEARCH_15_PARAMETERS_MS_AUTO_CALIBRATION_OUT_file	7
RESULTS_SEARCH_15_PARAMETERS_MS_AUTO_CALIBRATION_OUT_partnumber	8
RESULTS_SEARCH_15_PARAMETERS_MS_AUTO_CALIBRATION_OUT_polyorder	1
RESULTS_SEARCH_15_PARAMETERS_MS_AUTO_CALIBRATION_OUT_sample	1
RESULTS_SEARCH_15_PARAMETERS_MS_AUTO_CALIBRATION_OUT_squareroot	TRUE
RESULTS_SEARCH_15_PARAMETERS_MSMS_AUTO_CALIBRATION_OUT_avres	-6.94464e-08
RESULTS_SEARCH_15_PARAMETERS_MSMS_AUTO_CALIBRATION_OUT_c0	-1.86481e-05
RESULTS_SEARCH_15_PARAMETERS_MSMS_AUTO_CALIBRATION_OUT_c1minus1	1.02527e-06
RESULTS_SEARCH_15_PARAMETERS_MSMS_AUTO_CALIBRATION_OUT_c2	0
RESULTS_SEARCH_15_PARAMETERS_MSMS_AUTO_CALIBRATION_OUT_file	7
RESULTS_SEARCH_15_PARAMETERS_MSMS_AUTO_CALIBRATION_OUT_partnumber	8
RESULTS_SEARCH_15_PARAMETERS_MSMS_AUTO_CALIBRATION_OUT_polyorder	1
RESULTS_SEARCH_15_PARAMETERS_MSMS_AUTO_CALIBRATION_OUT_sample	1
RESULTS_SEARCH_15_PARAMETERS_MSMS_AUTO_CALIBRATION_OUT_squareroot	TRUE
RESULTS_SEARCH_15_PARAMETERS_MAX_PRECURSORS_FRAGLET	5
RESULTS_SEARCH_15_PARAMETERS_MAX_PRECURSORS_TAGLET	1
RESULTS_SEARCH_15_PARAMETERS_PRECURSORS_DR_FRAGLET	10
RESULTS_SEARCH_15_PARAMETERS_PRECURSORS_DR_TAGLET	3
RESULTS_SEARCH_15_PARAMETERS_DEFAULT_CHARGE_STATE_1_charge	2
RESULTS_SEARCH_15_PARAMETERS_DEFAULT_CHARGE_STATE_1_probability	1
RESULTS_SEARCH_15_PARAMETERS_DEFAULT_CHARGE_STATE_2_charge	3
RESULTS_SEARCH_15_PARAMETERS_DEFAULT_CHARGE_STATE_2_probability	1
RESULTS_SEARCH_15_PARAMETERS_DEFAULT_CHARGE_STATE_3_charge	4
RESULTS_SEARCH_15_PARAMETERS_DEFAULT_CHARGE_STATE_3_probability	1
RESULTS_SEARCH_15_PARAMETERS_VERSION	5.0.1.0, 4895
RESULTS_SEARCH_15_PARAMETERS_PARAGON_VERSION	5.0.1.0, 4874
RESULTS_SEARCH_15_PARAMETERS_APPLICATION	ProteinPilot(tm) Software
RESULTS_SEARCH_15_PARAMETERS_PROGROUP_alternativedispositionmaximumfoldprobabilitydrop	100
RESULTS_SEARCH_15_PARAMETERS_PROGROUP_alternativedispositionmaximumfoldscoredrop	2
RESULTS_SEARCH_15_PARAMETERS_PROGROUP_autodiscordantpeptidethreshold	0.3
RESULTS_SEARCH_15_PARAMETERS_PROGROUP_bayesconfidencecalclulation	TRUE
RESULTS_SEARCH_15_PARAMETERS_PROGROUP_calibrateconfidence	TRUE
RESULTS_SEARCH_15_PARAMETERS_PROGROUP_compresspeptides	FALSE
RESULTS_SEARCH_15_PARAMETERS_PROGROUP_confidencepercentthresholdforexcludingothersfromquant	15
RESULTS_SEARCH_15_PARAMETERS_PROGROUP_confidencepercentthresholdforincludingselfinquant	15
RESULTS_SEARCH_15_PARAMETERS_PROGROUP_donotstoremspeaklists	FALSE
RESULTS_SEARCH_15_PARAMETERS_PROGROUP_fasta	C:\AB SCIEX\ProteinPilot Data\SearchDatabases\uniprot-zebrafish_with_Clover.fasta
RESULTS_SEARCH_15_PARAMETERS_PROGROUP_featuregroupminpepconf	0.66
RESULTS_SEARCH_15_PARAMETERS_PROGROUP_featuregroupminups	0.47
RESULTS_SEARCH_15_PARAMETERS_PROGROUP_focusingintersection	4
RESULTS_SEARCH_15_PARAMETERS_PROGROUP_focusingminimummatchconfidence	0.1
RESULTS_SEARCH_15_PARAMETERS_PROGROUP_focusingminunusedprotscore	0.1
RESULTS_SEARCH_15_PARAMETERS_PROGROUP_focusingsubsetcutoff	6
RESULTS_SEARCH_15_PARAMETERS_PROGROUP_intersection	1.3
RESULTS_SEARCH_15_PARAMETERS_PROGROUP_minimummatchconfidencecutoff	0.001
RESULTS_SEARCH_15_PARAMETERS_PROGROUP_minunusedprotscore	01:05:57.120000
RESULTS_SEARCH_15_PARAMETERS_PROGROUP_subsetcutoff	2
RESULTS_SEARCH_15_PARAMETERS_PROGROUP_unusedprotscorethresholdforexcludingothersfromquant	1.3
RESULTS_SEARCH_15_PARAMETERS_PEAKLIST_count	3527
RESULTS_SEARCH_15_PARAMETERS_PEAKLIST_filenumber	1900-01-07
RESULTS_SEARCH_15_PARAMETERS_PEAKLIST_original_count	3527
RESULTS_SEARCH_15_PARAMETERS_PEAKLIST_originalfilename	C:\AB SCIEX\ProteinPilot Data\Results\Albert\ZX 20200624 6600\ZX 20200624 C4A 7.wiff
RESULTS_SEARCH_15_PARAMETERS_PEAKLIST_partnumber	8
RESULTS_SEARCH_15_PARAMETERS_QUANT_TYPE_background_correction	FALSE
RESULTS_SEARCH_15_PARAMETERS_QUANT_TYPE_bias_correction	TRUE
RESULTS_SEARCH_15_PARAMETERS_QUANT_TYPE_keep_extreme_peptides_over_fraction	00:00:00
RESULTS_SEARCH_15_PARAMETERS_QUANT_TYPE_low_confidence_check	TRUE
RESULTS_SEARCH_15_PARAMETERS_QUANT_TYPE_low_intensity_check	TRUE
RESULTS_SEARCH_15_PARAMETERS_QUANT_TYPE_median_statistic	TRUE
RESULTS_SEARCH_15_PARAMETERS_QUANT_TYPE_mod_check	TRUE
RESULTS_SEARCH_15_PARAMETERS_QUANT_TYPE_quant_threshold	-1
RESULTS_SEARCH_15_PARAMETERS_QUANT_TYPE_quant_threshold_sn	9
RESULTS_SEARCH_15_PARAMETERS_QUANT_TYPE_separate_searches	FALSE
RESULTS_SEARCH_15_PARAMETERS_QUANT_TYPE_shared_msms_check	TRUE
RESULTS_SEARCH_15_PARAMETERS_PARAGON_METHOD_SETTINGS_UI_SAMPLE_TYPE	Identification
RESULTS_SEARCH_15_PARAMETERS_PARAGON_METHOD_SETTINGS_UI_CYS_ALKYLATION	Iodoacetamide w other Cys mods possible
RESULTS_SEARCH_15_PARAMETERS_PARAGON_METHOD_SETTINGS_UI_DIGESTION	Trypsin + Lys C
RESULTS_SEARCH_15_PARAMETERS_PARAGON_METHOD_SETTINGS_UI_SPECIAL_FACTOR	Gel-based ID
RESULTS_SEARCH_15_PARAMETERS_PARAGON_METHOD_SETTINGS_UI_INSTRUMENT	TripleTOF 6600
RESULTS_SEARCH_15_PARAMETERS_PARAGON_METHOD_SETTINGS_UI_SEARCH_EFFORT	Thorough
RESULTS_SEARCH_15_PARAMETERS_PARAGON_METHOD_SETTINGS_UI_USER_NAME	IMB-MASS02\massuser
RESULTS_SEARCH_15_PARAMETERS_PARAGON_METHOD_SETTINGS_UI_MACHINE_NAME	IMB-MASS02
RESULTS_SEARCH_15_PARAMETERS_PARAGON_METHOD_SETTINGS_UI_SEARCH_ID	6.37467e+17
RESULTS_SEARCH_15_PARAMETERS_PARAGON_METHOD_SETTINGS_UI_START_TIME	2021-01-19 16:08:23
RESULTS_SEARCH_15_PARAMETERS_PARAGON_METHOD_SETTINGS_UI_MIN_UNUSED_PROTSCORE	0.0458
RESULTS_SEARCH_15_PARAMETERS_PARAGON_METHOD_SETTINGS_UI_PSPEP	TRUE
RESULTS_SEARCH_16_time_cpu	444041
RESULTS_SEARCH_16_time_duration	499515
RESULTS_SEARCH_16_version	5.0.1.4874
RESULTS_SEARCH_16_xml:id	SEARCH:2:637466692955257639_7
RESULTS_SEARCH_16_PARAMETERS_chemical_data_edited	FALSE
RESULTS_SEARCH_16_PARAMETERS_do_multiprecursor_search	TRUE
RESULTS_SEARCH_16_PARAMETERS_do_reverse_search	TRUE
RESULTS_SEARCH_16_PARAMETERS_max_quant_labels	35
RESULTS_SEARCH_16_PARAMETERS_maxresults	15
RESULTS_SEARCH_16_PARAMETERS_separate_searches	FALSE
RESULTS_SEARCH_16_PARAMETERS_MSTOLERANCE_type	dalton
RESULTS_SEARCH_16_PARAMETERS_MSTOLERANCE_value	0.05
RESULTS_SEARCH_16_PARAMETERS_MSMSTOLERANCE_type	dalton
RESULTS_SEARCH_16_PARAMETERS_MSMSTOLERANCE_value	0.1
RESULTS_SEARCH_16_PARAMETERS_MS_STANDARD_DEVIATION_type	dalton
RESULTS_SEARCH_16_PARAMETERS_MS_STANDARD_DEVIATION_value	0.0011
RESULTS_SEARCH_16_PARAMETERS_MSMS_STANDARD_DEVIATION_type	dalton
RESULTS_SEARCH_16_PARAMETERS_MSMS_STANDARD_DEVIATION_value	0.01
RESULTS_SEARCH_16_PARAMETERS_FASTA_filename	C:\AB SCIEX\ProteinPilot Data\SearchDatabases\uniprot-zebrafish_with_Clover.fasta
RESULTS_SEARCH_16_PARAMETERS_AUTO_CALIBRATION_ms	TRUE
RESULTS_SEARCH_16_PARAMETERS_AUTO_CALIBRATION_msexport	FALSE
RESULTS_SEARCH_16_PARAMETERS_AUTO_CALIBRATION_msms	TRUE
RESULTS_SEARCH_16_PARAMETERS_AUTO_CALIBRATION_msmstolsdratio	2.75
RESULTS_SEARCH_16_PARAMETERS_AUTO_CALIBRATION_mstolsdratio	7
RESULTS_SEARCH_16_PARAMETERS_AUTO_CALIBRATION_squareroot	TRUE
RESULTS_SEARCH_16_PARAMETERS_AUTO_CALIBRATION_type	dalton
RESULTS_SEARCH_16_PARAMETERS_AUTO_CALIBRATION_MCP_d_s_s_f	0.0666667
RESULTS_SEARCH_16_PARAMETERS_AUTO_CALIBRATION_MCP_d_s_w_f	3
RESULTS_SEARCH_16_PARAMETERS_AUTO_CALIBRATION_MCP_m_f_r_mbc	200
RESULTS_SEARCH_16_PARAMETERS_AUTO_CALIBRATION_MCP_m_m_c	10
RESULTS_SEARCH_16_PARAMETERS_AUTO_CALIBRATION_MCP_m_m_f_s	0.25
RESULTS_SEARCH_16_PARAMETERS_AUTO_CALIBRATION_MCP_m_m_p_f	0.33
RESULTS_SEARCH_16_PARAMETERS_AUTO_CALIBRATION_MCP_m_m_p_rms_f	1
RESULTS_SEARCH_16_PARAMETERS_AUTO_CALIBRATION_MCP_m_p_t_f	1
RESULTS_SEARCH_16_PARAMETERS_AUTO_CALIBRATION_MCP_m_r_h_n_b	15
RESULTS_SEARCH_16_PARAMETERS_AUTO_CALIBRATION_MCP_m_z_n_s	99
RESULTS_SEARCH_16_PARAMETERS_AUTO_CALIBRATION_MCP_m_z_s_mn_f_r	0.0666667
RESULTS_SEARCH_16_PARAMETERS_AUTO_CALIBRATION_MCP_m_z_s_mx_f_r	0.1
RESULTS_SEARCH_16_PARAMETERS_MS_AUTO_CALIBRATION_OUT_avres	-1.00371e-10
RESULTS_SEARCH_16_PARAMETERS_MS_AUTO_CALIBRATION_OUT_c0	-5.26354e-05
RESULTS_SEARCH_16_PARAMETERS_MS_AUTO_CALIBRATION_OUT_c1minus1	9.67474e-07
RESULTS_SEARCH_16_PARAMETERS_MS_AUTO_CALIBRATION_OUT_c2	0
RESULTS_SEARCH_16_PARAMETERS_MS_AUTO_CALIBRATION_OUT_file	7
RESULTS_SEARCH_16_PARAMETERS_MS_AUTO_CALIBRATION_OUT_partnumber	8
RESULTS_SEARCH_16_PARAMETERS_MS_AUTO_CALIBRATION_OUT_polyorder	1
RESULTS_SEARCH_16_PARAMETERS_MS_AUTO_CALIBRATION_OUT_sample	1
RESULTS_SEARCH_16_PARAMETERS_MS_AUTO_CALIBRATION_OUT_squareroot	TRUE
RESULTS_SEARCH_16_PARAMETERS_MSMS_AUTO_CALIBRATION_OUT_avres	-6.94464e-08
RESULTS_SEARCH_16_PARAMETERS_MSMS_AUTO_CALIBRATION_OUT_c0	-1.86481e-05
RESULTS_SEARCH_16_PARAMETERS_MSMS_AUTO_CALIBRATION_OUT_c1minus1	1.02527e-06
RESULTS_SEARCH_16_PARAMETERS_MSMS_AUTO_CALIBRATION_OUT_c2	0
RESULTS_SEARCH_16_PARAMETERS_MSMS_AUTO_CALIBRATION_OUT_file	7
RESULTS_SEARCH_16_PARAMETERS_MSMS_AUTO_CALIBRATION_OUT_partnumber	8
RESULTS_SEARCH_16_PARAMETERS_MSMS_AUTO_CALIBRATION_OUT_polyorder	1
RESULTS_SEARCH_16_PARAMETERS_MSMS_AUTO_CALIBRATION_OUT_sample	1
RESULTS_SEARCH_16_PARAMETERS_MSMS_AUTO_CALIBRATION_OUT_squareroot	TRUE
RESULTS_SEARCH_16_PARAMETERS_MAX_PRECURSORS_FRAGLET	5
RESULTS_SEARCH_16_PARAMETERS_MAX_PRECURSORS_TAGLET	1
RESULTS_SEARCH_16_PARAMETERS_PRECURSORS_DR_FRAGLET	10
RESULTS_SEARCH_16_PARAMETERS_PRECURSORS_DR_TAGLET	3
RESULTS_SEARCH_16_PARAMETERS_DEFAULT_CHARGE_STATE_1_charge	2
RESULTS_SEARCH_16_PARAMETERS_DEFAULT_CHARGE_STATE_1_probability	1
RESULTS_SEARCH_16_PARAMETERS_DEFAULT_CHARGE_STATE_2_charge	3
RESULTS_SEARCH_16_PARAMETERS_DEFAULT_CHARGE_STATE_2_probability	1
RESULTS_SEARCH_16_PARAMETERS_DEFAULT_CHARGE_STATE_3_charge	4
RESULTS_SEARCH_16_PARAMETERS_DEFAULT_CHARGE_STATE_3_probability	1
RESULTS_SEARCH_16_PARAMETERS_VERSION	5.0.1.0, 4895
RESULTS_SEARCH_16_PARAMETERS_PARAGON_VERSION	5.0.1.0, 4874
RESULTS_SEARCH_16_PARAMETERS_APPLICATION	ProteinPilot(tm) Software
RESULTS_SEARCH_16_PARAMETERS_PROGROUP_alternativedispositionmaximumfoldprobabilitydrop	100
RESULTS_SEARCH_16_PARAMETERS_PROGROUP_alternativedispositionmaximumfoldscoredrop	2
RESULTS_SEARCH_16_PARAMETERS_PROGROUP_autodiscordantpeptidethreshold	0.3
RESULTS_SEARCH_16_PARAMETERS_PROGROUP_bayesconfidencecalclulation	TRUE
RESULTS_SEARCH_16_PARAMETERS_PROGROUP_calibrateconfidence	TRUE
RESULTS_SEARCH_16_PARAMETERS_PROGROUP_compresspeptides	FALSE
RESULTS_SEARCH_16_PARAMETERS_PROGROUP_confidencepercentthresholdforexcludingothersfromquant	15
RESULTS_SEARCH_16_PARAMETERS_PROGROUP_confidencepercentthresholdforincludingselfinquant	15
RESULTS_SEARCH_16_PARAMETERS_PROGROUP_donotstoremspeaklists	FALSE
RESULTS_SEARCH_16_PARAMETERS_PROGROUP_fasta	C:\AB SCIEX\ProteinPilot Data\SearchDatabases\uniprot-zebrafish_with_Clover.fasta
RESULTS_SEARCH_16_PARAMETERS_PROGROUP_featuregroupminpepconf	0.66
RESULTS_SEARCH_16_PARAMETERS_PROGROUP_featuregroupminups	0.47
RESULTS_SEARCH_16_PARAMETERS_PROGROUP_focusingintersection	4
RESULTS_SEARCH_16_PARAMETERS_PROGROUP_focusingminimummatchconfidence	0.1
RESULTS_SEARCH_16_PARAMETERS_PROGROUP_focusingminunusedprotscore	0.1
RESULTS_SEARCH_16_PARAMETERS_PROGROUP_focusingsubsetcutoff	6
RESULTS_SEARCH_16_PARAMETERS_PROGROUP_intersection	1.3
RESULTS_SEARCH_16_PARAMETERS_PROGROUP_minimummatchconfidencecutoff	0.001
RESULTS_SEARCH_16_PARAMETERS_PROGROUP_minunusedprotscore	0.0458
RESULTS_SEARCH_16_PARAMETERS_PROGROUP_subsetcutoff	2
RESULTS_SEARCH_16_PARAMETERS_PROGROUP_unusedprotscorethresholdforexcludingothersfromquant	1.3
RESULTS_SEARCH_16_PARAMETERS_PEAKLIST_count	1909-08-27
RESULTS_SEARCH_16_PARAMETERS_PEAKLIST_filenumber	7
RESULTS_SEARCH_16_PARAMETERS_PEAKLIST_original_count	3527
RESULTS_SEARCH_16_PARAMETERS_PEAKLIST_originalfilename	C:\AB SCIEX\ProteinPilot Data\Results\Albert\ZX 20200624 6600\ZX 20200624 C4A 7.wiff
RESULTS_SEARCH_16_PARAMETERS_PEAKLIST_partnumber	8
RESULTS_SEARCH_16_PARAMETERS_QUANT_TYPE_background_correction	FALSE
RESULTS_SEARCH_16_PARAMETERS_QUANT_TYPE_bias_correction	TRUE
RESULTS_SEARCH_16_PARAMETERS_QUANT_TYPE_keep_extreme_peptides_over_fraction	0
RESULTS_SEARCH_16_PARAMETERS_QUANT_TYPE_low_confidence_check	TRUE
RESULTS_SEARCH_16_PARAMETERS_QUANT_TYPE_low_intensity_check	TRUE
RESULTS_SEARCH_16_PARAMETERS_QUANT_TYPE_median_statistic	TRUE
RESULTS_SEARCH_16_PARAMETERS_QUANT_TYPE_mod_check	TRUE
RESULTS_SEARCH_16_PARAMETERS_QUANT_TYPE_quant_threshold	-1
RESULTS_SEARCH_16_PARAMETERS_QUANT_TYPE_quant_threshold_sn	9
RESULTS_SEARCH_16_PARAMETERS_QUANT_TYPE_separate_searches	FALSE
RESULTS_SEARCH_16_PARAMETERS_QUANT_TYPE_shared_msms_check	TRUE
RESULTS_SEARCH_16_PARAMETERS_PARAGON_METHOD_SETTINGS_UI_SAMPLE_TYPE	Identification
RESULTS_SEARCH_16_PARAMETERS_PARAGON_METHOD_SETTINGS_UI_CYS_ALKYLATION	Iodoacetamide w other Cys mods possible
RESULTS_SEARCH_16_PARAMETERS_PARAGON_METHOD_SETTINGS_UI_DIGESTION	Trypsin + Lys C
RESULTS_SEARCH_16_PARAMETERS_PARAGON_METHOD_SETTINGS_UI_SPECIAL_FACTOR	Gel-based ID
RESULTS_SEARCH_16_PARAMETERS_PARAGON_METHOD_SETTINGS_UI_INSTRUMENT	TripleTOF 6600
RESULTS_SEARCH_16_PARAMETERS_PARAGON_METHOD_SETTINGS_UI_SEARCH_EFFORT	Thorough
RESULTS_SEARCH_16_PARAMETERS_PARAGON_METHOD_SETTINGS_UI_USER_NAME	IMB-MASS02\massuser
RESULTS_SEARCH_16_PARAMETERS_PARAGON_METHOD_SETTINGS_UI_MACHINE_NAME	IMB-MASS02
RESULTS_SEARCH_16_PARAMETERS_PARAGON_METHOD_SETTINGS_UI_SEARCH_ID	6.37467e+17
RESULTS_SEARCH_16_PARAMETERS_PARAGON_METHOD_SETTINGS_UI_START_TIME	2021-01-19 16:08:23
RESULTS_SEARCH_16_PARAMETERS_PARAGON_METHOD_SETTINGS_UI_MIN_UNUSED_PROTSCORE	0.0458
RESULTS_SEARCH_16_PARAMETERS_PARAGON_METHOD_SETTINGS_UI_PSPEP	TRUE
RESULTS_SEARCH_17_time_cpu	312860
RESULTS_SEARCH_17_time_duration	369172
RESULTS_SEARCH_17_version	5.0.1.4874
RESULTS_SEARCH_17_xml:id	SEARCH:1:637466692955257639_8
RESULTS_SEARCH_17_PARAMETERS_chemical_data_edited	FALSE
RESULTS_SEARCH_17_PARAMETERS_do_multiprecursor_search	TRUE
RESULTS_SEARCH_17_PARAMETERS_do_reverse_search	TRUE
RESULTS_SEARCH_17_PARAMETERS_max_quant_labels	35
RESULTS_SEARCH_17_PARAMETERS_maxresults	15
RESULTS_SEARCH_17_PARAMETERS_separate_searches	FALSE
RESULTS_SEARCH_17_PARAMETERS_MSTOLERANCE_type	dalton
RESULTS_SEARCH_17_PARAMETERS_MSTOLERANCE_value	0.05
RESULTS_SEARCH_17_PARAMETERS_MSMSTOLERANCE_type	dalton
RESULTS_SEARCH_17_PARAMETERS_MSMSTOLERANCE_value	0.1
RESULTS_SEARCH_17_PARAMETERS_MS_STANDARD_DEVIATION_type	dalton
RESULTS_SEARCH_17_PARAMETERS_MS_STANDARD_DEVIATION_value	0.0011
RESULTS_SEARCH_17_PARAMETERS_MSMS_STANDARD_DEVIATION_type	dalton
RESULTS_SEARCH_17_PARAMETERS_MSMS_STANDARD_DEVIATION_value	0.01
RESULTS_SEARCH_17_PARAMETERS_FASTA_filename	C:\AB SCIEX\ProteinPilot Data\SearchDatabases\uniprot-zebrafish_with_Clover.fasta
RESULTS_SEARCH_17_PARAMETERS_AUTO_CALIBRATION_ms	TRUE
RESULTS_SEARCH_17_PARAMETERS_AUTO_CALIBRATION_msexport	FALSE
RESULTS_SEARCH_17_PARAMETERS_AUTO_CALIBRATION_msms	TRUE
RESULTS_SEARCH_17_PARAMETERS_AUTO_CALIBRATION_msmstolsdratio	2.75
RESULTS_SEARCH_17_PARAMETERS_AUTO_CALIBRATION_mstolsdratio	7
RESULTS_SEARCH_17_PARAMETERS_AUTO_CALIBRATION_squareroot	TRUE
RESULTS_SEARCH_17_PARAMETERS_AUTO_CALIBRATION_type	dalton
RESULTS_SEARCH_17_PARAMETERS_AUTO_CALIBRATION_MCP_d_s_s_f	0.0666667
RESULTS_SEARCH_17_PARAMETERS_AUTO_CALIBRATION_MCP_d_s_w_f	3
RESULTS_SEARCH_17_PARAMETERS_AUTO_CALIBRATION_MCP_m_f_r_mbc	200
RESULTS_SEARCH_17_PARAMETERS_AUTO_CALIBRATION_MCP_m_m_c	10
RESULTS_SEARCH_17_PARAMETERS_AUTO_CALIBRATION_MCP_m_m_f_s	0.25
RESULTS_SEARCH_17_PARAMETERS_AUTO_CALIBRATION_MCP_m_m_p_f	0.33
RESULTS_SEARCH_17_PARAMETERS_AUTO_CALIBRATION_MCP_m_m_p_rms_f	1
RESULTS_SEARCH_17_PARAMETERS_AUTO_CALIBRATION_MCP_m_p_t_f	1
RESULTS_SEARCH_17_PARAMETERS_AUTO_CALIBRATION_MCP_m_r_h_n_b	15
RESULTS_SEARCH_17_PARAMETERS_AUTO_CALIBRATION_MCP_m_z_n_s	99
RESULTS_SEARCH_17_PARAMETERS_AUTO_CALIBRATION_MCP_m_z_s_mn_f_r	0.0666667
RESULTS_SEARCH_17_PARAMETERS_AUTO_CALIBRATION_MCP_m_z_s_mx_f_r	0.1
RESULTS_SEARCH_17_PARAMETERS_MAX_PRECURSORS_FRAGLET	5
RESULTS_SEARCH_17_PARAMETERS_MAX_PRECURSORS_TAGLET	1
RESULTS_SEARCH_17_PARAMETERS_PRECURSORS_DR_FRAGLET	10
RESULTS_SEARCH_17_PARAMETERS_PRECURSORS_DR_TAGLET	3
RESULTS_SEARCH_17_PARAMETERS_DEFAULT_CHARGE_STATE_1_charge	2
RESULTS_SEARCH_17_PARAMETERS_DEFAULT_CHARGE_STATE_1_probability	1
RESULTS_SEARCH_17_PARAMETERS_DEFAULT_CHARGE_STATE_2_charge	3
RESULTS_SEARCH_17_PARAMETERS_DEFAULT_CHARGE_STATE_2_probability	1
RESULTS_SEARCH_17_PARAMETERS_DEFAULT_CHARGE_STATE_3_charge	4
RESULTS_SEARCH_17_PARAMETERS_DEFAULT_CHARGE_STATE_3_probability	1
RESULTS_SEARCH_17_PARAMETERS_VERSION	5.0.1.0, 4895
RESULTS_SEARCH_17_PARAMETERS_PARAGON_VERSION	5.0.1.0, 4874
RESULTS_SEARCH_17_PARAMETERS_APPLICATION	ProteinPilot(tm) Software
RESULTS_SEARCH_17_PARAMETERS_PROGROUP_alternativedispositionmaximumfoldprobabilitydrop	100
RESULTS_SEARCH_17_PARAMETERS_PROGROUP_alternativedispositionmaximumfoldscoredrop	2
RESULTS_SEARCH_17_PARAMETERS_PROGROUP_autodiscordantpeptidethreshold	0.3
RESULTS_SEARCH_17_PARAMETERS_PROGROUP_bayesconfidencecalclulation	TRUE
RESULTS_SEARCH_17_PARAMETERS_PROGROUP_calibrateconfidence	TRUE
RESULTS_SEARCH_17_PARAMETERS_PROGROUP_compresspeptides	FALSE
RESULTS_SEARCH_17_PARAMETERS_PROGROUP_confidencepercentthresholdforexcludingothersfromquant	15
RESULTS_SEARCH_17_PARAMETERS_PROGROUP_confidencepercentthresholdforincludingselfinquant	1900-01-15
RESULTS_SEARCH_17_PARAMETERS_PROGROUP_donotstoremspeaklists	FALSE
RESULTS_SEARCH_17_PARAMETERS_PROGROUP_fasta	C:\AB SCIEX\ProteinPilot Data\SearchDatabases\uniprot-zebrafish_with_Clover.fasta
RESULTS_SEARCH_17_PARAMETERS_PROGROUP_featuregroupminpepconf	0.66
RESULTS_SEARCH_17_PARAMETERS_PROGROUP_featuregroupminups	0.47
RESULTS_SEARCH_17_PARAMETERS_PROGROUP_focusingintersection	4
RESULTS_SEARCH_17_PARAMETERS_PROGROUP_focusingminimummatchconfidence	0.1
RESULTS_SEARCH_17_PARAMETERS_PROGROUP_focusingminunusedprotscore	0.1
RESULTS_SEARCH_17_PARAMETERS_PROGROUP_focusingsubsetcutoff	6
RESULTS_SEARCH_17_PARAMETERS_PROGROUP_intersection	1.3
RESULTS_SEARCH_17_PARAMETERS_PROGROUP_minimummatchconfidencecutoff	0.001
RESULTS_SEARCH_17_PARAMETERS_PROGROUP_minunusedprotscore	0.0458
RESULTS_SEARCH_17_PARAMETERS_PROGROUP_subsetcutoff	2
RESULTS_SEARCH_17_PARAMETERS_PROGROUP_unusedprotscorethresholdforexcludingothersfromquant	1.3
RESULTS_SEARCH_17_PARAMETERS_PEAKLIST_count	2637
RESULTS_SEARCH_17_PARAMETERS_PEAKLIST_filenumber	8
RESULTS_SEARCH_17_PARAMETERS_PEAKLIST_original_count	2637
RESULTS_SEARCH_17_PARAMETERS_PEAKLIST_originalfilename	C:\AB SCIEX\ProteinPilot Data\Results\Albert\ZX 20200624 6600\ZX 20200624 C4A 8.wiff
RESULTS_SEARCH_17_PARAMETERS_PEAKLIST_partnumber	9
RESULTS_SEARCH_17_PARAMETERS_QUANT_TYPE_background_correction	FALSE
RESULTS_SEARCH_17_PARAMETERS_QUANT_TYPE_bias_correction	TRUE
RESULTS_SEARCH_17_PARAMETERS_QUANT_TYPE_keep_extreme_peptides_over_fraction	0
RESULTS_SEARCH_17_PARAMETERS_QUANT_TYPE_low_confidence_check	TRUE
RESULTS_SEARCH_17_PARAMETERS_QUANT_TYPE_low_intensity_check	TRUE
RESULTS_SEARCH_17_PARAMETERS_QUANT_TYPE_median_statistic	TRUE
RESULTS_SEARCH_17_PARAMETERS_QUANT_TYPE_mod_check	TRUE
RESULTS_SEARCH_17_PARAMETERS_QUANT_TYPE_quant_threshold	-1
RESULTS_SEARCH_17_PARAMETERS_QUANT_TYPE_quant_threshold_sn	9
RESULTS_SEARCH_17_PARAMETERS_QUANT_TYPE_separate_searches	FALSE
RESULTS_SEARCH_17_PARAMETERS_QUANT_TYPE_shared_msms_check	TRUE
RESULTS_SEARCH_17_PARAMETERS_PARAGON_METHOD_SETTINGS_UI_SAMPLE_TYPE	Identification
RESULTS_SEARCH_17_PARAMETERS_PARAGON_METHOD_SETTINGS_UI_CYS_ALKYLATION	Iodoacetamide w other Cys mods possible
RESULTS_SEARCH_17_PARAMETERS_PARAGON_METHOD_SETTINGS_UI_DIGESTION	Trypsin + Lys C
RESULTS_SEARCH_17_PARAMETERS_PARAGON_METHOD_SETTINGS_UI_SPECIAL_FACTOR	Gel-based ID
RESULTS_SEARCH_17_PARAMETERS_PARAGON_METHOD_SETTINGS_UI_INSTRUMENT	TripleTOF 6600
RESULTS_SEARCH_17_PARAMETERS_PARAGON_METHOD_SETTINGS_UI_SEARCH_EFFORT	Thorough
RESULTS_SEARCH_17_PARAMETERS_PARAGON_METHOD_SETTINGS_UI_USER_NAME	IMB-MASS02\massuser
RESULTS_SEARCH_17_PARAMETERS_PARAGON_METHOD_SETTINGS_UI_MACHINE_NAME	IMB-MASS02
RESULTS_SEARCH_17_PARAMETERS_PARAGON_METHOD_SETTINGS_UI_SEARCH_ID	6.37467e+17
RESULTS_SEARCH_17_PARAMETERS_PARAGON_METHOD_SETTINGS_UI_START_TIME	2021-01-19 16:08:23
RESULTS_SEARCH_17_PARAMETERS_PARAGON_METHOD_SETTINGS_UI_MIN_UNUSED_PROTSCORE	0.0458
RESULTS_SEARCH_17_PARAMETERS_PARAGON_METHOD_SETTINGS_UI_PSPEP	TRUE
RESULTS_SEARCH_18_time_cpu	324248
RESULTS_SEARCH_18_time_duration	350545
RESULTS_SEARCH_18_version	5.0.1.4874
RESULTS_SEARCH_18_xml:id	SEARCH:2:637466692955257639_8
RESULTS_SEARCH_18_PARAMETERS_chemical_data_edited	FALSE
RESULTS_SEARCH_18_PARAMETERS_do_multiprecursor_search	TRUE
RESULTS_SEARCH_18_PARAMETERS_do_reverse_search	TRUE
RESULTS_SEARCH_18_PARAMETERS_max_quant_labels	35
RESULTS_SEARCH_18_PARAMETERS_maxresults	15
RESULTS_SEARCH_18_PARAMETERS_separate_searches	FALSE
RESULTS_SEARCH_18_PARAMETERS_MSTOLERANCE_type	dalton
RESULTS_SEARCH_18_PARAMETERS_MSTOLERANCE_value	0.05
RESULTS_SEARCH_18_PARAMETERS_MSMSTOLERANCE_type	dalton
RESULTS_SEARCH_18_PARAMETERS_MSMSTOLERANCE_value	0.1
RESULTS_SEARCH_18_PARAMETERS_MS_STANDARD_DEVIATION_type	dalton
RESULTS_SEARCH_18_PARAMETERS_MS_STANDARD_DEVIATION_value	0.0011
RESULTS_SEARCH_18_PARAMETERS_MSMS_STANDARD_DEVIATION_type	dalton
RESULTS_SEARCH_18_PARAMETERS_MSMS_STANDARD_DEVIATION_value	0.01
RESULTS_SEARCH_18_PARAMETERS_FASTA_filename	C:\AB SCIEX\ProteinPilot Data\SearchDatabases\uniprot-zebrafish_with_Clover.fasta
RESULTS_SEARCH_18_PARAMETERS_AUTO_CALIBRATION_ms	TRUE
RESULTS_SEARCH_18_PARAMETERS_AUTO_CALIBRATION_msexport	FALSE
RESULTS_SEARCH_18_PARAMETERS_AUTO_CALIBRATION_msms	TRUE
RESULTS_SEARCH_18_PARAMETERS_AUTO_CALIBRATION_msmstolsdratio	2.75
RESULTS_SEARCH_18_PARAMETERS_AUTO_CALIBRATION_mstolsdratio	7
RESULTS_SEARCH_18_PARAMETERS_AUTO_CALIBRATION_squareroot	TRUE
RESULTS_SEARCH_18_PARAMETERS_AUTO_CALIBRATION_type	dalton
RESULTS_SEARCH_18_PARAMETERS_AUTO_CALIBRATION_MCP_d_s_s_f	0.0666667
RESULTS_SEARCH_18_PARAMETERS_AUTO_CALIBRATION_MCP_d_s_w_f	3
RESULTS_SEARCH_18_PARAMETERS_AUTO_CALIBRATION_MCP_m_f_r_mbc	200
RESULTS_SEARCH_18_PARAMETERS_AUTO_CALIBRATION_MCP_m_m_c	10
RESULTS_SEARCH_18_PARAMETERS_AUTO_CALIBRATION_MCP_m_m_f_s	0.25
RESULTS_SEARCH_18_PARAMETERS_AUTO_CALIBRATION_MCP_m_m_p_f	0.33
RESULTS_SEARCH_18_PARAMETERS_AUTO_CALIBRATION_MCP_m_m_p_rms_f	1
RESULTS_SEARCH_18_PARAMETERS_AUTO_CALIBRATION_MCP_m_p_t_f	1
RESULTS_SEARCH_18_PARAMETERS_AUTO_CALIBRATION_MCP_m_r_h_n_b	15
RESULTS_SEARCH_18_PARAMETERS_AUTO_CALIBRATION_MCP_m_z_n_s	99
RESULTS_SEARCH_18_PARAMETERS_AUTO_CALIBRATION_MCP_m_z_s_mn_f_r	0.0666667
RESULTS_SEARCH_18_PARAMETERS_AUTO_CALIBRATION_MCP_m_z_s_mx_f_r	0.1
RESULTS_SEARCH_18_PARAMETERS_MAX_PRECURSORS_FRAGLET	5
RESULTS_SEARCH_18_PARAMETERS_MAX_PRECURSORS_TAGLET	1
RESULTS_SEARCH_18_PARAMETERS_PRECURSORS_DR_FRAGLET	10
RESULTS_SEARCH_18_PARAMETERS_PRECURSORS_DR_TAGLET	3
RESULTS_SEARCH_18_PARAMETERS_DEFAULT_CHARGE_STATE_1_charge	2
RESULTS_SEARCH_18_PARAMETERS_DEFAULT_CHARGE_STATE_1_probability	1
RESULTS_SEARCH_18_PARAMETERS_DEFAULT_CHARGE_STATE_2_charge	3
RESULTS_SEARCH_18_PARAMETERS_DEFAULT_CHARGE_STATE_2_probability	1
RESULTS_SEARCH_18_PARAMETERS_DEFAULT_CHARGE_STATE_3_charge	4
RESULTS_SEARCH_18_PARAMETERS_DEFAULT_CHARGE_STATE_3_probability	1
RESULTS_SEARCH_18_PARAMETERS_VERSION	5.0.1.0, 4895
RESULTS_SEARCH_18_PARAMETERS_PARAGON_VERSION	5.0.1.0, 4874
RESULTS_SEARCH_18_PARAMETERS_APPLICATION	ProteinPilot(tm) Software
RESULTS_SEARCH_18_PARAMETERS_PROGROUP_alternativedispositionmaximumfoldprobabilitydrop	100
RESULTS_SEARCH_18_PARAMETERS_PROGROUP_alternativedispositionmaximumfoldscoredrop	2
RESULTS_SEARCH_18_PARAMETERS_PROGROUP_autodiscordantpeptidethreshold	07:12:00
RESULTS_SEARCH_18_PARAMETERS_PROGROUP_bayesconfidencecalclulation	TRUE
RESULTS_SEARCH_18_PARAMETERS_PROGROUP_calibrateconfidence	TRUE
RESULTS_SEARCH_18_PARAMETERS_PROGROUP_compresspeptides	FALSE
RESULTS_SEARCH_18_PARAMETERS_PROGROUP_confidencepercentthresholdforexcludingothersfromquant	15
RESULTS_SEARCH_18_PARAMETERS_PROGROUP_confidencepercentthresholdforincludingselfinquant	15
RESULTS_SEARCH_18_PARAMETERS_PROGROUP_donotstoremspeaklists	FALSE
RESULTS_SEARCH_18_PARAMETERS_PROGROUP_fasta	C:\AB SCIEX\ProteinPilot Data\SearchDatabases\uniprot-zebrafish_with_Clover.fasta
RESULTS_SEARCH_18_PARAMETERS_PROGROUP_featuregroupminpepconf	0.66
RESULTS_SEARCH_18_PARAMETERS_PROGROUP_featuregroupminups	0.47
RESULTS_SEARCH_18_PARAMETERS_PROGROUP_focusingintersection	4
RESULTS_SEARCH_18_PARAMETERS_PROGROUP_focusingminimummatchconfidence	0.1
RESULTS_SEARCH_18_PARAMETERS_PROGROUP_focusingminunusedprotscore	0.1
RESULTS_SEARCH_18_PARAMETERS_PROGROUP_focusingsubsetcutoff	6
RESULTS_SEARCH_18_PARAMETERS_PROGROUP_intersection	1.3
RESULTS_SEARCH_18_PARAMETERS_PROGROUP_minimummatchconfidencecutoff	0.001
RESULTS_SEARCH_18_PARAMETERS_PROGROUP_minunusedprotscore	0.0458
RESULTS_SEARCH_18_PARAMETERS_PROGROUP_subsetcutoff	2
RESULTS_SEARCH_18_PARAMETERS_PROGROUP_unusedprotscorethresholdforexcludingothersfromquant	1.3
RESULTS_SEARCH_18_PARAMETERS_PEAKLIST_count	2637
RESULTS_SEARCH_18_PARAMETERS_PEAKLIST_filenumber	8
RESULTS_SEARCH_18_PARAMETERS_PEAKLIST_original_count	2637
RESULTS_SEARCH_18_PARAMETERS_PEAKLIST_originalfilename	C:\AB SCIEX\ProteinPilot Data\Results\Albert\ZX 20200624 6600\ZX 20200624 C4A 8.wiff
RESULTS_SEARCH_18_PARAMETERS_PEAKLIST_partnumber	9
RESULTS_SEARCH_18_PARAMETERS_QUANT_TYPE_background_correction	FALSE
RESULTS_SEARCH_18_PARAMETERS_QUANT_TYPE_bias_correction	TRUE
RESULTS_SEARCH_18_PARAMETERS_QUANT_TYPE_keep_extreme_peptides_over_fraction	0
[truncated: 4,512 more rows]

## Sheet: Metadata Calculations
	Subsearch	Search string	present		File index down	Part number	Spectra - 'original'	Spectra 'count' - non-empty?	max original Spectra for part	Max non-empty spectra for part	File Index for first only
	1	RESULTS_SEARCH_1_PARAMETERS_PEAKLIST_rawdatafilename		C:\AB SCIEX\ProteinPilot Data\Results\Albert\ZX 20200624 6600\ZX 20200624 C4A 1.wiff	1	1	2640	2639	2640	2639	1
	2	RESULTS_SEARCH_2_PARAMETERS_PEAKLIST_rawdatafilename		C:\AB SCIEX\ProteinPilot Data\Results\Albert\ZX 20200624 6600\ZX 20200624 C4A 1.wiff	1	1	2640	2639
	3	RESULTS_SEARCH_3_PARAMETERS_PEAKLIST_rawdatafilename		C:\AB SCIEX\ProteinPilot Data\Results\Albert\ZX 20200624 6600\ZX 20200624 C4A 2.wiff	2	2	3629	3629	3629	3629	2
1 if Rapid, 2 if Thor	4	RESULTS_SEARCH_4_PARAMETERS_PEAKLIST_rawdatafilename		C:\AB SCIEX\ProteinPilot Data\Results\Albert\ZX 20200624 6600\ZX 20200624 C4A 2.wiff	2	2	3629	3629
2	5	RESULTS_SEARCH_5_PARAMETERS_PEAKLIST_rawdatafilename		C:\AB SCIEX\ProteinPilot Data\Results\Albert\ZX 20200624 6600\ZX 20200624 C4A 3.wiff	3	3	3741	3741	3741	3741	3
	6	RESULTS_SEARCH_6_PARAMETERS_PEAKLIST_rawdatafilename		C:\AB SCIEX\ProteinPilot Data\Results\Albert\ZX 20200624 6600\ZX 20200624 C4A 3.wiff	3	3	3741	3741
# Segments	7	RESULTS_SEARCH_7_PARAMETERS_PEAKLIST_rawdatafilename		C:\AB SCIEX\ProteinPilot Data\Results\Albert\ZX 20200624 6600\ZX 20200624 C4A 3.wiff	3	4	3716	3716	3716	3716
62	8	RESULTS_SEARCH_8_PARAMETERS_PEAKLIST_rawdatafilename		C:\AB SCIEX\ProteinPilot Data\Results\Albert\ZX 20200624 6600\ZX 20200624 C4A 3.wiff	3	4	3716	3716
(max is 1000 segments)	9	RESULTS_SEARCH_9_PARAMETERS_PEAKLIST_rawdatafilename		C:\AB SCIEX\ProteinPilot Data\Results\Albert\ZX 20200624 6600\ZX 20200624 C4A 4.wiff	4	5	2966	2966	2966	2966	4
	10	RESULTS_SEARCH_10_PARAMETERS_PEAKLIST_rawdatafilename		C:\AB SCIEX\ProteinPilot Data\Results\Albert\ZX 20200624 6600\ZX 20200624 C4A 4.wiff	4	5	2966	2966
	11	RESULTS_SEARCH_11_PARAMETERS_PEAKLIST_rawdatafilename		C:\AB SCIEX\ProteinPilot Data\Results\Albert\ZX 20200624 6600\ZX 20200624 C4A 5.wiff	5	6	2690	2690	2690	2690	5
	12	RESULTS_SEARCH_12_PARAMETERS_PEAKLIST_rawdatafilename		C:\AB SCIEX\ProteinPilot Data\Results\Albert\ZX 20200624 6600\ZX 20200624 C4A 5.wiff	5	6	2690	2690
	13	RESULTS_SEARCH_13_PARAMETERS_PEAKLIST_rawdatafilename		C:\AB SCIEX\ProteinPilot Data\Results\Albert\ZX 20200624 6600\ZX 20200624 C4A 6.wiff	6	7	2736	2736	2736	2736	6
	14	RESULTS_SEARCH_14_PARAMETERS_PEAKLIST_rawdatafilename		C:\AB SCIEX\ProteinPilot Data\Results\Albert\ZX 20200624 6600\ZX 20200624 C4A 6.wiff	6	7	2736	2736
	15	RESULTS_SEARCH_15_PARAMETERS_PEAKLIST_rawdatafilename		C:\AB SCIEX\ProteinPilot Data\Results\Albert\ZX 20200624 6600\ZX 20200624 C4A 7.wiff	7	8	3527	3527	3527	3527	7
	16	RESULTS_SEARCH_16_PARAMETERS_PEAKLIST_rawdatafilename		C:\AB SCIEX\ProteinPilot Data\Results\Albert\ZX 20200624 6600\ZX 20200624 C4A 7.wiff	7	8	3527	3527
	17	RESULTS_SEARCH_17_PARAMETERS_PEAKLIST_rawdatafilename		C:\AB SCIEX\ProteinPilot Data\Results\Albert\ZX 20200624 6600\ZX 20200624 C4A 8.wiff	8	9	2637	2637	2637	2637	8
	18	RESULTS_SEARCH_18_PARAMETERS_PEAKLIST_rawdatafilename		C:\AB SCIEX\ProteinPilot Data\Results\Albert\ZX 20200624 6600\ZX 20200624 C4A 8.wiff	8	9	2637	2637
	19	RESULTS_SEARCH_19_PARAMETERS_PEAKLIST_rawdatafilename		C:\AB SCIEX\ProteinPilot Data\Results\Albert\ZX 20200624 6600\ZX 20200624 C4A 9.wiff	9	10	3144	3144	3144	3144	9
	20	RESULTS_SEARCH_20_PARAMETERS_PEAKLIST_rawdatafilename		C:\AB SCIEX\ProteinPilot Data\Results\Albert\ZX 20200624 6600\ZX 20200624 C4A 9.wiff	9	10	3144	3144
	21	RESULTS_SEARCH_21_PARAMETERS_PEAKLIST_rawdatafilename		C:\AB SCIEX\ProteinPilot Data\Results\Albert\ZX 20200624 6600\ZX 20200624 C4A 10.wiff	10	11	3126	3126	3126	3126	10
	22	RESULTS_SEARCH_22_PARAMETERS_PEAKLIST_rawdatafilename		C:\AB SCIEX\ProteinPilot Data\Results\Albert\ZX 20200624 6600\ZX 20200624 C4A 10.wiff	10	11	3126	3126
	23	RESULTS_SEARCH_23_PARAMETERS_PEAKLIST_rawdatafilename		C:\AB SCIEX\ProteinPilot Data\Results\Albert\ZX 20200624 6600\ZX 20200624 C4A 11.wiff	11	12	3323	3323	3323	3323	11
	24	RESULTS_SEARCH_24_PARAMETERS_PEAKLIST_rawdatafilename		C:\AB SCIEX\ProteinPilot Data\Results\Albert\ZX 20200624 6600\ZX 20200624 C4A 11.wiff	11	12	3323	3323
	25	RESULTS_SEARCH_25_PARAMETERS_PEAKLIST_rawdatafilename		C:\AB SCIEX\ProteinPilot Data\Results\Albert\ZX 20200819 6600\ZX 20200819 6600 C4A 1.wiff	12	13	2186	2186	2186	2186	12
	26	RESULTS_SEARCH_26_PARAMETERS_PEAKLIST_rawdatafilename		C:\AB SCIEX\ProteinPilot Data\Results\Albert\ZX 20200819 6600\ZX 20200819 6600 C4A 1.wiff	12	13	2186	2186
	27	RESULTS_SEARCH_27_PARAMETERS_PEAKLIST_rawdatafilename		C:\AB SCIEX\ProteinPilot Data\Results\Albert\ZX 20200819 6600\ZX 20200819 6600 C4A 2.wiff	13	14	2830	2829	2830	2829	13
	28	RESULTS_SEARCH_28_PARAMETERS_PEAKLIST_rawdatafilename		C:\AB SCIEX\ProteinPilot Data\Results\Albert\ZX 20200819 6600\ZX 20200819 6600 C4A 2.wiff	13	14	2830	2829
	29	RESULTS_SEARCH_29_PARAMETERS_PEAKLIST_rawdatafilename		C:\AB SCIEX\ProteinPilot Data\Results\Albert\ZX 20200819 6600\ZX 20200819 6600 C4A 3.wiff	14	15	1772	1772	1772	1772	14
	30	RESULTS_SEARCH_30_PARAMETERS_PEAKLIST_rawdatafilename		C:\AB SCIEX\ProteinPilot Data\Results\Albert\ZX 20200819 6600\ZX 20200819 6600 C4A 3.wiff	14	15	1772	1772
	31	RESULTS_SEARCH_31_PARAMETERS_PEAKLIST_rawdatafilename		C:\AB SCIEX\ProteinPilot Data\Results\Albert\ZX 20200819 6600\ZX 20200819 6600 C4A 4.wiff	15	16	3011	3011	3011	3011	15
	32	RESULTS_SEARCH_32_PARAMETERS_PEAKLIST_rawdatafilename		C:\AB SCIEX\ProteinPilot Data\Results\Albert\ZX 20200819 6600\ZX 20200819 6600 C4A 4.wiff	15	16	3011	3011
	33	RESULTS_SEARCH_33_PARAMETERS_PEAKLIST_rawdatafilename		C:\AB SCIEX\ProteinPilot Data\Results\Albert\ZX 20200819 6600\ZX 20200819 6600 C4A 5.wiff	16	17	762	762	762	762	16
	34	RESULTS_SEARCH_34_PARAMETERS_PEAKLIST_rawdatafilename		C:\AB SCIEX\ProteinPilot Data\Results\Albert\ZX 20200819 6600\ZX 20200819 6600 C4A 5.wiff	16	17	762	762
	35	RESULTS_SEARCH_35_PARAMETERS_PEAKLIST_rawdatafilename		C:\AB SCIEX\ProteinPilot Data\Results\Albert\ZX 20200819 6600\ZX 20200819 6600 C4A 6.wiff	17	18	2432	2432	2432	2432	17
	36	RESULTS_SEARCH_36_PARAMETERS_PEAKLIST_rawdatafilename		C:\AB SCIEX\ProteinPilot Data\Results\Albert\ZX 20200819 6600\ZX 20200819 6600 C4A 6.wiff	17	18	2432	2432
	37	RESULTS_SEARCH_37_PARAMETERS_PEAKLIST_rawdatafilename		C:\AB SCIEX\ProteinPilot Data\Results\Albert\ZX 20200819 6600\ZX 20200819 6600 C4A 7.wiff	18	19	2647	2645	2647	2645	18
	38	RESULTS_SEARCH_38_PARAMETERS_PEAKLIST_rawdatafilename		C:\AB SCIEX\ProteinPilot Data\Results\Albert\ZX 20200819 6600\ZX 20200819 6600 C4A 7.wiff	18	19	2647	2645
	39	RESULTS_SEARCH_39_PARAMETERS_PEAKLIST_rawdatafilename		C:\AB SCIEX\ProteinPilot Data\Results\Albert\ZX 20200819 6600\ZX 20200819 6600 C4A 8.wiff	19	20	2669	2669	2669	2669	19
	40	RESULTS_SEARCH_40_PARAMETERS_PEAKLIST_rawdatafilename		C:\AB SCIEX\ProteinPilot Data\Results\Albert\ZX 20200819 6600\ZX 20200819 6600 C4A 8.wiff	19	20	2669	2669
	41	RESULTS_SEARCH_41_PARAMETERS_PEAKLIST_rawdatafilename		C:\AB SCIEX\ProteinPilot Data\Results\Albert\ZX 20200819 6600\ZX 20200819 6600 C4A 9.wiff	20	21	2425	2425	2425	2425	20
	42	RESULTS_SEARCH_42_PARAMETERS_PEAKLIST_rawdatafilename		C:\AB SCIEX\ProteinPilot Data\Results\Albert\ZX 20200819 6600\ZX 20200819 6600 C4A 9.wiff	20	21	2425	2425
	43	RESULTS_SEARCH_43_PARAMETERS_PEAKLIST_rawdatafilename		C:\AB SCIEX\ProteinPilot Data\Results\Albert\ZX 20200819 6600\ZX 20200819 6600 C4A 10.wiff	21	22	2190	2189	2190	2189	21
	44	RESULTS_SEARCH_44_PARAMETERS_PEAKLIST_rawdatafilename		C:\AB SCIEX\ProteinPilot Data\Results\Albert\ZX 20200819 6600\ZX 20200819 6600 C4A 10.wiff	21	22	2190	2189
	45	RESULTS_SEARCH_45_PARAMETERS_PEAKLIST_rawdatafilename		C:\AB SCIEX\ProteinPilot Data\Results\Albert\ZX 20200819 6600\ZX 20200819 6600 C4A 11.wiff	22	23	1716	1716	1716	1716	22
	46	RESULTS_SEARCH_46_PARAMETERS_PEAKLIST_rawdatafilename		C:\AB SCIEX\ProteinPilot Data\Results\Albert\ZX 20200819 6600\ZX 20200819 6600 C4A 11.wiff	22	23	1716	1716
	47	RESULTS_SEARCH_47_PARAMETERS_PEAKLIST_rawdatafilename		C:\AB SCIEX\ProteinPilot Data\Results\Albert\ZX 20200819 6600\ZX 20200819 6600 C4A 12.wiff	23	24	2530	2528	2530	2528	23
	48	RESULTS_SEARCH_48_PARAMETERS_PEAKLIST_rawdatafilename		C:\AB SCIEX\ProteinPilot Data\Results\Albert\ZX 20200819 6600\ZX 20200819 6600 C4A 12.wiff	23	24	2530	2528
	49	RESULTS_SEARCH_49_PARAMETERS_PEAKLIST_rawdatafilename		C:\AB SCIEX\ProteinPilot Data\Results\Albert\ZX 20200819 6600\ZX 20200819 6600 C4A 12.wiff	23	25	2527	2527	2527	2527
	50	RESULTS_SEARCH_50_PARAMETERS_PEAKLIST_rawdatafilename		C:\AB SCIEX\ProteinPilot Data\Results\Albert\ZX 20200819 6600\ZX 20200819 6600 C4A 12.wiff	23	25	2527	2527
	51	RESULTS_SEARCH_51_PARAMETERS_PEAKLIST_rawdatafilename		C:\AB SCIEX\ProteinPilot Data\Results\Albert\ZX 20200819 6600\ZX 20200819 6600 C4A 13.wiff	24	26	2327	2326	2327	2326	24
	52	RESULTS_SEARCH_52_PARAMETERS_PEAKLIST_rawdatafilename		C:\AB SCIEX\ProteinPilot Data\Results\Albert\ZX 20200819 6600\ZX 20200819 6600 C4A 13.wiff	24	26	2327	2326
	53	RESULTS_SEARCH_53_PARAMETERS_PEAKLIST_rawdatafilename		C:\AB SCIEX\ProteinPilot Data\Results\Albert\ZX 20200819 6600\ZX 20200819 6600 C4A 13.wiff	24	27	2314	2314	2314	2314
	54	RESULTS_SEARCH_54_PARAMETERS_PEAKLIST_rawdatafilename		C:\AB SCIEX\ProteinPilot Data\Results\Albert\ZX 20200819 6600\ZX 20200819 6600 C4A 13.wiff	24	27	2314	2314
	55	RESULTS_SEARCH_55_PARAMETERS_PEAKLIST_rawdatafilename		C:\AB SCIEX\ProteinPilot Data\Results\Albert\ZX 20200819 6600\ZX 20200819 6600 C4A 14.wiff	25	28	2897	2894	2897	2894	25
	56	RESULTS_SEARCH_56_PARAMETERS_PEAKLIST_rawdatafilename		C:\AB SCIEX\ProteinPilot Data\Results\Albert\ZX 20200819 6600\ZX 20200819 6600 C4A 14.wiff	25	28	2897	2894
	57	RESULTS_SEARCH_57_PARAMETERS_PEAKLIST_rawdatafilename		C:\AB SCIEX\ProteinPilot Data\Results\Albert\ZX 20200819 6600\ZX 20200819 6600 C4A 14.wiff	25	29	2888	2888	2888	2888
	58	RESULTS_SEARCH_58_PARAMETERS_PEAKLIST_rawdatafilename		C:\AB SCIEX\ProteinPilot Data\Results\Albert\ZX 20200819 6600\ZX 20200819 6600 C4A 14.wiff	25	29	2888	2888
	59	RESULTS_SEARCH_59_PARAMETERS_PEAKLIST_rawdatafilename		C:\AB SCIEX\ProteinPilot Data\Results\Albert\ZX 20200819 6600\ZX 20200819 6600 C4A 15.wiff	26	30	2234	2233	2234	2233	26
	60	RESULTS_SEARCH_60_PARAMETERS_PEAKLIST_rawdatafilename		C:\AB SCIEX\ProteinPilot Data\Results\Albert\ZX 20200819 6600\ZX 20200819 6600 C4A 15.wiff	26	30	2234	2233
	61	RESULTS_SEARCH_61_PARAMETERS_PEAKLIST_rawdatafilename		C:\AB SCIEX\ProteinPilot Data\Results\Albert\ZX 20200819 6600\ZX 20200819 6600 C4A 15.wiff	26	31	2218	2218	2218	2218
	62	RESULTS_SEARCH_62_PARAMETERS_PEAKLIST_rawdatafilename		C:\AB SCIEX\ProteinPilot Data\Results\Albert\ZX 20200819 6600\ZX 20200819 6600 C4A 15.wiff	26	31	2218	2218

## Sheet: Curated Metadata
Group file metadata term	Metadata Description (of raw extracted item)	Use Partial Match	Term in Stream	Derived (Calculated)	Value	Validation check/comments	Conversion type, if done	Conversion factor		Metadata Category	Metadata Description of Final Metadata Item (converted manually, if applicable)	Value
	Group filename			1						Attributes - General	Group filename	Source_File_3_Cavin4a.group
RESULTS_SEARCH_1_PARAMETERS_PARAGON_METHOD_SETTINGS_UI_START_TIME	Start date		1		2021-01-19 16:08:23					Attributes - General	Start date	2021-01-19 16:08:23
RESULTS_SEARCH_STAT_search_begin_time_clock	Start time		1		01/19/2021 16:08:23					Attributes - General	Start time	01/19/2021 16:08:23
RESULTS_SEARCH_1_PARAMETERS_PARAGON_METHOD_SETTINGS_UI_USER_NAME	User name		1		IMB-MASS02\massuser					Attributes - General	User name	IMB-MASS02\massuser
RESULTS_SEARCH_1_xml:id	Internal search identifier number		1	1						Attributes - General	Internal search identifier number
PARAMETERS_PEAKLIST_original_count				1						Attributes - Input data	Number of spectra in search	82450
PARAMETERS_PEAKLIST_count				1						Attributes - Input data	Number of non-empty spectra in search	82438
PARAMETERS_PEAKLIST_filenumber	Number of input files	1	1	1	26					Attributes - Input data	Number of input files	26
RESULTS_SEARCH_1_PARAMETERS_PARAGON_METHOD_SETTINGS_UI_SAMPLE_TYPE	Sample Type		1		Identification					Parameters - User settings	Sample Type	Identification
RESULTS_SEARCH_1_PARAMETERS_PARAGON_METHOD_SETTINGS_UI_CYS_ALKYLATION	Cysteine Alkylation		1		Iodoacetamide w other Cys mods possible					Parameters - User settings	Cysteine Alkylation	Iodoacetamide w other Cys mods possible
RESULTS_SEARCH_1_PARAMETERS_PARAGON_METHOD_SETTINGS_UI_DIGESTION	Digestion		1		Trypsin + Lys C					Parameters - User settings	Digestion	Trypsin + Lys C
RESULTS_SEARCH_1_PARAMETERS_PARAGON_METHOD_SETTINGS_UI_SPECIAL_FACTOR	Special Factors		1		Gel-based ID					Parameters - User settings	Special Factors	Gel-based ID
RESULTS_SEARCH_1_PARAMETERS_PARAGON_METHOD_SETTINGS_UI_INSTRUMENT	Instrument		1		TripleTOF 6600					Parameters - User settings	Instrument	TripleTOF 6600
RESULTS_SEARCH_1_PARAMETERS_PARAGON_METHOD_SETTINGS_UI_SPECIES	Species									Parameters - User settings	Species
RESULTS_SEARCH_1_PARAMETERS_PARAGON_METHOD_SETTINGS_UI_SEARCH_EFFORT	Search Effort		1		Thorough					Parameters - User settings	Search Effort	Thorough
RESULTS_SEARCH_1_PARAMETERS_PARAGON_METHOD_SETTINGS_UI_ID_FOCUS	ID Focus									Parameters - User settings	ID Focus
RESULTS_SEARCH_1_PARAMETERS_PARAGON_METHOD_SETTINGS_UI_MIN_UNUSED_PROTSCORE	Minimum Unused ProtScore		1		0.0458					Parameters - User settings	Minimum Unused ProtScore	0.0458
RESULTS_SEARCH_1_PARAMETERS_PARAGON_METHOD_SETTINGS_UI_PSPEP	FDR Analysis		1		TRUE		Logical to English			Parameters - User settings	FDR Analysis	Yes
	Quantitation						Logical to English			Parameters - User settings	Quantitation
RESULTS_SEARCH_1_PARAMETERS_QUANT_TYPE_background_correction	Background Correction		1		FALSE		Logical to English			Parameters - User settings	Background Correction	No
RESULTS_SEARCH_1_PARAMETERS_QUANT_TYPE_bias_correction	Bias Correction		1		TRUE		Logical to English			Parameters - User settings	Bias Correction	Yes
	Channel to use as denominator in ratios									Parameters - User settings	Channel to use as denominator in ratios
RESULTS_SEARCH_1_PARAMETERS_chemical_data_edited	Modified Data Dictionary or Parameter Translation		1		FALSE		Logical to English			Parameters - User settings	Modified Data Dictionary or Parameter Translation	No
RESULTS_SEARCH_1_PARAMETERS_FASTA_filename	Database filename		1		C:\AB SCIEX\ProteinPilot Data\SearchDatabases\uniprot-zebrafish_with_Clover.fasta					Attributes - Search database	Database filename	C:\AB SCIEX\ProteinPilot Data\SearchDatabases\uniprot-zebrafish_with_Clover.fasta
				1						Attributes - Search database	Number of Proteins in Database	75212
RESULTS_SEARCH_STAT_num_proteins	Number of proteins searched		1		150424					Attributes - Search database	Number of proteins searched	150424
				1						Attributes - Search database	Number of Residues in Database	37854281
RESULTS_SEARCH_STAT_num_residues	Number of residues searched		1		75708562					Attributes - Search database	Number of residues searched	75708562
RESULTS_SEARCH_STAT_computer_memory	RAM (MB)		1		32767					Attributes - Hardware	RAM (MB)	32767
RESULTS_SEARCH_STAT_computer_name	Computer name		1		IMB-MASS02					Attributes - Hardware	Computer name	IMB-MASS02
RESULTS_SEARCH_STAT_number_cores	Number of cores in computer		1		8					Attributes - Hardware	Number of cores in computer	8
RESULTS_SEARCH_STAT_number_processors	Number of threads (double cores if hyperthreading on)		1		8					Attributes - Hardware	Number of threads (double cores if hyperthreading on)	8
RESULTS_SEARCH_STAT_number_licensed_tasks	Number of cores licensed to use		1		16					Attributes - Software environment	Number of cores licensed to use	16
RESULTS_SEARCH_STAT_os	Operating system		1		Windows Server 2008 R2 Standard (6.1.7600)					Attributes - Software environment	Operating system	Windows Server 2008 R2 Standard (6.1.7600)
RESULTS_SEARCH_1_PARAMETERS_VERSION	ProteinPilot Software Version		1		5.0.1.0, 4895					Attributes - Software environment	ProteinPilot Software Version	5.0.1.0, 4895
RESULTS_SEARCH_1_PARAMETERS_PARAGON_VERSION	Paragon Algorithm Version		1		5.0.1.0, 4874					Attributes - Software environment	Paragon Algorithm Version	5.0.1.0, 4874
RESULTS_SEARCH_1_PARAMETERS_APPLICATION	Application name		1		ProteinPilot(tm) Software					Attributes - Software environment	Application name	ProteinPilot(tm) Software
RESULTS_GROUPRESULTSUMMARY_1_confidence	Confidence of first row in summary statistics ID statistics		1		0.99		Fraction to %	100		Statistics - Protein Summary Table	Percent Confidence of first row in Summary Statistics ID Statistics	99
RESULTS_GROUPRESULTSUMMARY_1_distinctpeptides	Distinct peptides associated with 99% confidence proteins		1		588					Statistics - Protein Summary Table	Distinct peptides associated with 99% confidence proteins	588
RESULTS_GROUPRESULTSUMMARY_1_proteinsbeforegroupping	Proteins before grouping (99% confidence)		1		217					Statistics - Protein Summary Table	Proteins before grouping (99% confidence)	217
RESULTS_GROUPRESULTSUMMARY_1_proteinsidentified	Proteins detected (99% confidence)		1		37					Statistics - Protein Summary Table	Proteins detected (99% confidence)	37
RESULTS_GROUPRESULTSUMMARY_1_spectraidentified	Spectra associated with 99% confidence proteins		1		5681					Statistics - Protein Summary Table	Spectra associated with 99% confidence proteins	5681
RESULTS_GROUPRESULTSUMMARY_2_confidence	Confidence of second row in Summary Statistics ID statistics		1		0.95		Fraction to %	100		Statistics - Protein Summary Table	Percent Confidence of first row in Summary Statistics ID Statistics	95
RESULTS_GROUPRESULTSUMMARY_2_distinctpeptides	Distinct peptides associated with 95% confidence proteins		1		627					Statistics - Protein Summary Table	Distinct peptides associated with 95% confidence proteins	627
RESULTS_GROUPRESULTSUMMARY_2_proteinsbeforegroupping	Proteins before grouping (95% confidence)		1		337					Statistics - Protein Summary Table	Proteins before grouping (95% confidence)	337
RESULTS_GROUPRESULTSUMMARY_2_proteinsidentified	Proteins detected (95% confidence)		1		58					Statistics - Protein Summary Table	Proteins detected (95% confidence)	58
RESULTS_GROUPRESULTSUMMARY_2_spectraidentified	Spectra associated with 95% confidence proteins		1		5786					Statistics - Protein Summary Table	Spectra associated with 95% confidence proteins	5786
RESULTS_GROUPRESULTSUMMARY_3_confidence	Confidence of third row in summary statistics ID statistics		1		0.66		Fraction to %	100		Statistics - Protein Summary Table	Percent Confidence of first row in Summary Statistics ID Statistics	66
RESULTS_GROUPRESULTSUMMARY_3_distinctpeptides	Distinct peptides associated with 66% confidence proteins		1		643					Statistics - Protein Summary Table	Distinct peptides associated with 66% confidence proteins	643
RESULTS_GROUPRESULTSUMMARY_3_proteinsbeforegroupping	Proteins before grouping (66% confidence)		1		398					Statistics - Protein Summary Table	Proteins before grouping (66% confidence)	398
RESULTS_GROUPRESULTSUMMARY_3_proteinsidentified	Proteins detected (66% confidence)		1		70					Statistics - Protein Summary Table	Proteins detected (66% confidence)	70
RESULTS_GROUPRESULTSUMMARY_3_spectraidentified	Spectra associated with 66% confidence proteins		1		6013					Statistics - Protein Summary Table	Spectra associated with 66% confidence proteins	6013
RESULTS_GROUPRESULTSUMMARY_4_confidence	Confidence of fourth row in Summary Statistics ID statistics		1		0.100088		Fraction to %	100		Statistics - Protein Summary Table	Percent Confidence of first row in Summary Statistics ID Statistics	10.0088
RESULTS_GROUPRESULTSUMMARY_4_distinctpeptides	Distinct peptides associated with 10% confidence proteins		1		683					Statistics - Protein Summary Table	Distinct peptides associated with 10% confidence proteins	683
RESULTS_GROUPRESULTSUMMARY_4_proteinsbeforegroupping	Proteins before grouping (10% confidence)		1		488					Statistics - Protein Summary Table	Proteins before grouping (10% confidence)	488
RESULTS_GROUPRESULTSUMMARY_4_proteinsidentified	Proteins detected (10% confidence)		1		102					Statistics - Protein Summary Table	Proteins detected (10% confidence)	102
RESULTS_GROUPRESULTSUMMARY_4_spectraidentified	Spectra associated with 10% confidence proteins		1		6560					Statistics - Protein Summary Table	Spectra associated with 10% confidence proteins	6560
PARAMETERS_PEAKLIST_partnumber	Number of segments the input data are broken into	1	1	1	31					Parameters - Search Dimension Factors	Number of segments the input data are broken into	31
				1						Parameters - Search Dimension Factors	Number of searches per segment (2 for Thorough, 1 for Rapid)	2
				1						Parameters - Search Dimension Factors	Number of apparent sub-searches in group file	62
RESULTS_SEARCH_1_PARAMETERS_do_reverse_search	Do reversed search		1		TRUE					Parameters - Search Dimension Factors	Do reversed search	TRUE
RESULTS_SEARCH_1_PARAMETERS_QUANT_TYPE_separate_searches	Do separate searches for each plex in MS1 quantitation		1		FALSE					Parameters - Search Dimension Factors	Do separate searches for each plex in MS1 quantitation	FALSE
RESULTS_SEARCH_1_PARAMETERS_maxresults	Maximum number of hypotheses to keep per spectrum		1		15					Parameters - Search Dimension Factors	Maximum number of hypotheses to keep per spectrum	15
RESULTS_SEARCH_1_PARAMETERS_MSTOLERANCE_type	MS1 initial mass error tolerance type		1		dalton					Parameters - Identification - Mass accuracy	MS1 initial mass error tolerance type	dalton
RESULTS_SEARCH_1_PARAMETERS_MSTOLERANCE_value	MS1 initial mass error tolerance value		1		0.05					Parameters - Identification - Mass accuracy	MS1 initial mass error tolerance value	0.05
RESULTS_SEARCH_1_PARAMETERS_MSMSTOLERANCE_type	MS2 initial mass error tolerance type		1		dalton					Parameters - Identification - Mass accuracy	MS2 initial mass error tolerance type	dalton
RESULTS_SEARCH_1_PARAMETERS_MSMSTOLERANCE_value	MS2 initial mass error tolerance value		1		0.1					Parameters - Identification - Mass accuracy	MS2 initial mass error tolerance value	0.1
RESULTS_SEARCH_1_PARAMETERS_MS_STANDARD_DEVIATION_type	MS1 final mass error standard deviation type		1		dalton					Parameters - Identification - Mass accuracy	MS1 final mass error standard deviation type	dalton
RESULTS_SEARCH_1_PARAMETERS_MS_STANDARD_DEVIATION_value	MS1 final mass error standard deviation value		1		0.0011					Parameters - Identification - Mass accuracy	MS1 final mass error standard deviation value	0.0011
RESULTS_SEARCH_1_PARAMETERS_MSMS_STANDARD_DEVIATION_type	MS2 final mass error standard deviation type		1		dalton					Parameters - Identification - Mass accuracy	MS2 final mass error standard deviation type	dalton
RESULTS_SEARCH_1_PARAMETERS_MSMS_STANDARD_DEVIATION_value	MS2 final mass error standard deviation value		1		0.01					Parameters - Identification - Mass accuracy	MS2 final mass error standard deviation value	0.01
RESULTS_SEARCH_1_PARAMETERS_do_multiprecursor_search	Use multi-precursor search function		1		TRUE					Parameters - Identification - Multi-precursor search	Use multi-precursor search function	TRUE
RESULTS_SEARCH_1_PARAMETERS_MAX_PRECURSORS_FRAGLET	Maximum number of different precursor masses to try to match to in the Fraglet stage when doing multi-precursor search		1		5					Parameters - Identification - Multi-precursor search	Maximum number of different precursor masses to try to match to in the Fraglet stage when doing multi-precursor search	5
RESULTS_SEARCH_1_PARAMETERS_PRECURSORS_DR_FRAGLET	Maximum dynamic range gap of secondary precursors vs primary precursor in the Fraglet stage when doing multi-precursor search		1		10					Parameters - Identification - Multi-precursor search	Maximum dynamic range gap of secondary precursors vs primary precursor in the Fraglet stage when doing multi-precursor search	10
RESULTS_SEARCH_1_PARAMETERS_MAX_PRECURSORS_TAGLET	Maximum number of different precursor masses to try to match to in the Taglet stage when doing multi-precursor search		1		1					Parameters - Identification - Multi-precursor search	Maximum number of different precursor masses to try to match to in the Taglet stage when doing multi-precursor search	1
RESULTS_SEARCH_1_PARAMETERS_PRECURSORS_DR_TAGLET	Maximum dynamic range gap of secondary precursors vs primary precursor in the Taglet stage when doing multi-precursor search		1		3					Parameters - Identification - Multi-precursor search	Maximum dynamic range gap of secondary precursors vs primary precursor in the Taglet stage when doing multi-precursor search	3
RESULTS_SEARCH_1_PARAMETERS_DEFAULT_CHARGE_STATE_1_charge	First charge state to consider when precursor z is not determined		1		2					Parameters - Identification - Charge ambiguity	First charge state to consider when precursor z is not determined	2
RESULTS_SEARCH_1_PARAMETERS_DEFAULT_CHARGE_STATE_1_probability	Probability of first charge state to consider when precursor z is not determined		1		1					Parameters - Identification - Charge ambiguity	Probability of first charge state to consider when precursor z is not determined	1
RESULTS_SEARCH_1_PARAMETERS_DEFAULT_CHARGE_STATE_2_charge	Second charge state to consider when precursor z is not determined		1		3					Parameters - Identification - Charge ambiguity	Second charge state to consider when precursor z is not determined	3
RESULTS_SEARCH_1_PARAMETERS_DEFAULT_CHARGE_STATE_2_probability	Probability of second charge state to consider when precursor z is not determined		1		1					Parameters - Identification - Charge ambiguity	Probability of second charge state to consider when precursor z is not determined	1
RESULTS_SEARCH_1_PARAMETERS_DEFAULT_CHARGE_STATE_3_charge	Third charge state to consider when precursor z is not determined		1		4					Parameters - Identification - Charge ambiguity	Third charge state to consider when precursor z is not determined	4
RESULTS_SEARCH_1_PARAMETERS_DEFAULT_CHARGE_STATE_3_probability	Probability of third charge state to consider when precursor z is not determined		1		1					Parameters - Identification - Charge ambiguity	Probability of third charge state to consider when precursor z is not determined	1
RESULTS_SEARCH_1_PARAMETERS_DEFAULT_CHARGE_STATE_4_charge	Fourth charge state to consider when precursor z is not determined									Parameters - Identification - Charge ambiguity	Fourth charge state to consider when precursor z is not determined
RESULTS_SEARCH_1_PARAMETERS_DEFAULT_CHARGE_STATE_4_probability	Probability of fourth charge state to consider when precursor z is not determined									Parameters - Identification - Charge ambiguity	Probability of fourth charge state to consider when precursor z is not determined
RESULTS_SEARCH_1_PARAMETERS_PROGROUP_bayesconfidencecalclulation	Use Bayesian protein confidence calculation		1		TRUE					Parameters - Protein Grouping	Use Bayesian protein confidence calculation	TRUE
RESULTS_SEARCH_1_PARAMETERS_PROGROUP_calibrateconfidence	Use peptide FDR analysis to recalibrate peptide confidences		1		TRUE					Parameters - Protein Grouping	Use peptide FDR analysis to recalibrate peptide confidences	TRUE
RESULTS_SEARCH_1_PARAMETERS_PROGROUP_focusingintersection	In mid-Pro Group, minimum Intersection ProtScore to be in Same Group		1		4					Parameters - Protein Grouping	In mid-Pro Group, minimum Intersection ProtScore to be in Same Group	4
RESULTS_SEARCH_1_PARAMETERS_PROGROUP_focusingminunusedprotscore	In mid-Pro Group, minimum Unused ProtScore to keep a Group		1		0.1					Parameters - Protein Grouping	In mid-Pro Group, minimum Unused ProtScore to keep a Group	0.1
RESULTS_SEARCH_1_PARAMETERS_PROGROUP_focusingsubsetcutoff	In mid-Pro Group, keep competitor proteins with ProtScore units from winner		1		6					Parameters - Protein Grouping	In mid-Pro Group, keep competitor proteins with ProtScore units from winner	6
RESULTS_SEARCH_1_PARAMETERS_PROGROUP_intersection	In final Pro Group, minimum Intersection ProtScore to be in same group		1		1.3					Parameters - Protein Grouping	In final Pro Group, minimum Intersection ProtScore to be in same group	1.3
RESULTS_SEARCH_1_PARAMETERS_PROGROUP_minunusedprotscore	In final Pro Group, minimum Unused ProtScore to keep a group		1		0.0458					Parameters - Protein Grouping	In final Pro Group, minimum Unused ProtScore to keep a group	0.0458
RESULTS_SEARCH_1_PARAMETERS_PROGROUP_subsetcutoff	In final Pro Group, keep competitor proteins with ProtScore units from winner		1		2					Parameters - Protein Grouping	In final Pro Group, keep competitor proteins with ProtScore units from winner	2
RESULTS_SEARCH_1_PARAMETERS_QUANT_TYPE_background_correction	Do isobaric quant background correction algorithm		1		FALSE					Parameters - Quantitation - processing	Do isobaric quant background correction algorithm	FALSE
RESULTS_SEARCH_1_PARAMETERS_QUANT_TYPE_bias_correction	Normalize the central tendency of protein ratios to be unity		1		TRUE					Parameters - Quantitation - processing	Normalize the central tendency of protein ratios to be unity	TRUE
RESULTS_SEARCH_1_PARAMETERS_QUANT_TYPE_median_statistic	Compute protein-level ratios from the median of peptide ratios		1		TRUE					Parameters - Quantitation - processing	Compute protein-level ratios from the median of peptide ratios	TRUE
RESULTS_SEARCH_1_PARAMETERS_QUANT_TYPE_quant_threshold	Quant threshold setting no longer used		1		-1					Parameters - Quantitation - processing	Quant threshold setting no longer used	-1
RESULTS_SEARCH_1_PARAMETERS_QUANT_TYPE_quant_threshold_sn	Use measures for quantitation if signal to noise is greater than		1		9					Parameters - Quantitation - processing	Use measures for quantitation if signal to noise is greater than	9
RESULTS_SEARCH_1_PARAMETERS_max_quant_labels	Maximum number of labels allowed on a peptide for it to be used for quantitation		1		35					Parameters - Quantitation - curation	Maximum number of labels allowed on a peptide for it to be used for quantitation	35
RESULTS_SEARCH_1_PARAMETERS_QUANT_TYPE_keep_extreme_peptides_over_fraction	Include extreme ratios in the protein ratio calculation if the fraction of peptides from a protein having extreme ratios is greater than		1		0					Parameters - Quantitation - curation	Include extreme ratios in the protein ratio calculation if the fraction of peptides from a protein having extreme ratios is greater than	0
RESULTS_SEARCH_1_PARAMETERS_QUANT_TYPE_low_confidence_check	Exclude quantitation data if identification confidence does not pass a threshold value		1		TRUE					Parameters - Quantitation - curation	Exclude quantitation data if identification confidence does not pass a threshold value	TRUE
RESULTS_SEARCH_1_PARAMETERS_QUANT_TYPE_low_intensity_check	Exclude quantitation data if a minimum intensity is not passed		1		TRUE					Parameters - Quantitation - curation	Exclude quantitation data if a minimum intensity is not passed	TRUE
RESULTS_SEARCH_1_PARAMETERS_QUANT_TYPE_mod_check	Exclude quantitation data based on discordant peptide logic		1		TRUE					Parameters - Quantitation - curation	Exclude quantitation data based on discordant peptide logic	TRUE
RESULTS_SEARCH_1_PARAMETERS_QUANT_TYPE_shared_msms_check	Exclude quantitation data using sharing logic		1		TRUE					Parameters - Quantitation - curation	Exclude quantitation data using sharing logic	TRUE
RESULTS_SEARCH_1_PARAMETERS_PROGROUP_unusedprotscorethresholdforexcludingothersfromquant	Minimum protein confidence to consider a protein confident and capable of excluding spectra as shared		1		1.3					Parameters - Quantitation - curation	Minimum protein confidence to consider a protein confident and capable of excluding spectra as shared	1.3
RESULTS_SEARCH_1_PARAMETERS_PROGROUP_confidencepercentthresholdforexcludingothersfromquant	Minimum peptide percent confidence from a confident protein to consider a spectrum shared		1		15					Parameters - Quantitation - curation	Minimum peptide percent confidence from a confident protein to consider a spectrum shared	15
RESULTS_SEARCH_1_PARAMETERS_PROGROUP_confidencepercentthresholdforincludingselfinquant	Minimum peptide confidence to be used for quantitation		1		15					Parameters - Quantitation - curation	Minimum peptide confidence to be used for quantitation	15
RESULTS_SEARCH_1_PARAMETERS_PROGROUP_autodiscordantpeptidethreshold	Consider a peptide discordant if joint feature probability less than		1		0.3					Parameters - Quantitation - curation	Consider a peptide discordant if joint feature probability less than	0.3
RESULTS_SEARCH_1_PARAMETERS_PROGROUP_compresspeptides	Show results only for distinct peptides, suppressing redundancy		1		FALSE					Parameters - Non-functional	Show results only for distinct peptides, suppressing redundancy	FALSE
RESULTS_SEARCH_1_PARAMETERS_PROGROUP_donotstoremspeaklists	Do not store MS1 level data		1		FALSE					Parameters - Non-functional	Do not store MS1 level data	FALSE
RESULTS_SEARCH_STAT_search_begin_time_clock	Start time - Search		1		01/19/2021 16:08:23					Statistics - Processing Times - Start&Stop Clock Times	Start time - Search	01/19/2021 16:08:23
RESULTS_SEARCH_STAT_search_end_time_clock	End time - Search		1		01/20/2021 17:43:38					Statistics - Processing Times - Start&Stop Clock Times	End time - Search	01/20/2021 17:43:38
RESULTS_SEARCH_STAT_stage_searching_begin_time_clock	Start time - Identification algorithm stages		1		01/20/2021 15:35:56					Statistics - Processing Times - Start&Stop Clock Times	Start time - Identification algorithm stages	01/20/2021 15:35:56
RESULTS_SEARCH_STAT_stage_searching_end_time_clock	End time - Identification algorithm stages		1		01/20/2021 17:41:45					Statistics - Processing Times - Start&Stop Clock Times	End time - Identification algorithm stages	01/20/2021 17:41:45
RESULTS_SEARCH_STAT_stage_signal_processing_begin_time_clock	Start time - Signal processing stage		1		01/19/2021 16:08:24					Statistics - Processing Times - Start&Stop Clock Times	Start time - Signal processing stage	01/19/2021 16:08:24
RESULTS_SEARCH_STAT_stage_signal_processing_end_time_clock	End time - Signal processing stage		1		01/20/2021 15:33:01					Statistics - Processing Times - Start&Stop Clock Times	End time - Signal processing stage	01/20/2021 15:33:01
RESULTS_SEARCH_STAT_stage_waiting_begin_time_clock	Start time - Waiting stage		1		01/20/2021 15:33:01					Statistics - Processing Times - Start&Stop Clock Times	Start time - Waiting stage	01/20/2021 15:33:01
RESULTS_SEARCH_STAT_stage_waiting_end_time_clock	End time - Waiting stage		1		01/20/2021 15:35:56					Statistics - Processing Times - Start&Stop Clock Times	End time - Waiting stage	01/20/2021 15:35:56
RESULTS_SEARCH_STAT_task_fraglet_exe_begin_time_clock	Start time - Fraglet Algorithm search stage		1		01/20/2021 16:21:19					Statistics - Processing Times - Start&Stop Clock Times	Start time - Fraglet Algorithm search stage	01/20/2021 16:21:19
RESULTS_SEARCH_STAT_task_fraglet_exe_end_time_clock	End time - Fraglet Algorithm search stage		1		01/20/2021 16:40:22					Statistics - Processing Times - Start&Stop Clock Times	End time - Fraglet Algorithm search stage	01/20/2021 16:40:22
RESULTS_SEARCH_STAT_task_focusing_begin_time_clock	Start time - Mid-Pro Group Algorithm stage		1		01/20/2021 16:40:22					Statistics - Processing Times - Start&Stop Clock Times	Start time - Mid-Pro Group Algorithm stage	01/20/2021 16:40:22
RESULTS_SEARCH_STAT_task_focusing_end_time_clock	End time - Mid-Pro Group Algorithm stage		1		01/20/2021 16:45:48					Statistics - Processing Times - Start&Stop Clock Times	End time - Mid-Pro Group Algorithm stage	01/20/2021 16:45:48
RESULTS_SEARCH_STAT_task_taglet_exe_begin_time_clock	Start time - Taglet Algorithm search stage		1		01/20/2021 16:45:48					Statistics - Processing Times - Start&Stop Clock Times	Start time - Taglet Algorithm search stage	01/20/2021 16:45:48
RESULTS_SEARCH_STAT_task_taglet_exe_end_time_clock	End time - Taglet Algorithm search stage		1		01/20/2021 17:36:14					Statistics - Processing Times - Start&Stop Clock Times	End time - Taglet Algorithm search stage	01/20/2021 17:36:14
RESULTS_SEARCH_STAT_task_progroup_begin_time_clock	Start time - Final Pro Group Algorithm stage		1		01/20/2021 17:36:14					Statistics - Processing Times - Start&Stop Clock Times	Start time - Final Pro Group Algorithm stage	01/20/2021 17:36:14
RESULTS_SEARCH_STAT_task_progroup_end_time_clock	End time - Final Pro Group Algorithm stage		1		01/20/2021 17:41:45					Statistics - Processing Times - Start&Stop Clock Times	End time - Final Pro Group Algorithm stage	01/20/2021 17:41:45
RESULTS_SEARCH_STAT_stage_fdr_begin_time_clock	Start time - FDR analysis stage		1		01/20/2021 17:41:45					Statistics - Processing Times - Start&Stop Clock Times	Start time - FDR analysis stage	01/20/2021 17:41:45
RESULTS_SEARCH_STAT_stage_fdr_end_time_clock	End time - FDR analysis stage		1		01/20/2021 17:43:38					Statistics - Processing Times - Start&Stop Clock Times	End time - FDR analysis stage	01/20/2021 17:43:38
RESULTS_SEARCH_STAT_search_time_duration	Clock Time Duration for Full Search (ms)		1		92115132		msec to min	1.66667e-05		Statistics - Processing Times - Duration in Real Clock Times	Clock time duration - Full search (min)	1535.25
RESULTS_SEARCH_STAT_stage_searching_time_duration	Clock Time Duration for Identification Algorithm Stages (ms)		1		7549163		msec to min	1.66667e-05		Statistics - Processing Times - Duration in Real Clock Times	Clock time duration - Identification algorithm stages (min)	125.819
RESULTS_SEARCH_STAT_stage_signal_processing_time_duration	Clock Time Duration for Waiting Stage (ms)		1		84276343		msec to min	1.66667e-05		Statistics - Processing Times - Duration in Real Clock Times	Clock time duration - Signal processing stage (min)	1404.61
RESULTS_SEARCH_STAT_stage_waiting_time_duration	Clock Time Duration for Signal Processing Stage (ms)		1		175163		msec to min	1.66667e-05		Statistics - Processing Times - Duration in Real Clock Times	Clock time duration - Waiting stage (min)	2.91938
RESULTS_SEARCH_STAT_task_fraglet_exe_time_duration	Clock Time Duration for Fraglet Algorithm Stage (ms)		1		1143055		msec to min	1.66667e-05		Statistics - Processing Times - Duration in Real Clock Times	Clock time duration - Fraglet Algorithm stage (min)	19.0509
RESULTS_SEARCH_STAT_task_focusing_time_duration	Clock Time Duration for Mid-Pro Group Algorithm Stage (ms)		1		325834		msec to min	1.66667e-05		Statistics - Processing Times - Duration in Real Clock Times	Clock time duration - Mid-Pro Group Algorithm stage (min)	5.43057
RESULTS_SEARCH_STAT_task_taglet_exe_time_duration	Clock Time Duration for Taglet Algorithm Stage (ms)		1		3026315		msec to min	1.66667e-05		Statistics - Processing Times - Duration in Real Clock Times	Clock time duration - Taglet Algorithm stage (min)	50.4386
RESULTS_SEARCH_STAT_task_progroup_time_duration	Clock Time Duration for Pro Group Algorithm Stage (ms)		1		330233		msec to min	1.66667e-05		Statistics - Processing Times - Duration in Real Clock Times	Clock time duration - Pro Group Algorithm stage (min)	5.50388
RESULTS_SEARCH_STAT_stage_fdr_time_duration	Clock Time Duration for FDR Analysis (ms)		1		112542		msec to min	1.66667e-05		Statistics - Processing Times - Duration in Real Clock Times	Clock time duration - FDR Analysis (min)	1.8757
				1						Statistics - Processing Times - Duration in Real Clock Times	Clock time not accounted for in measured stages	45.4275
	CPU Time Duration for Signal Processing Stage (ms)						msec to min	1.66667e-05		Statistics - Processing Times - Duration in CPU Time	CPU time duration - Signal Processing stage (min)
RESULTS_SEARCH_STAT_task_fraglet_exe_time_cpu	CPU Time Duration for Fraglet Algorithm Stage (ms)		1		5261820		msec to min	1.66667e-05		Statistics - Processing Times - Duration in CPU Time	CPU time duration - Fraglet Algorithm stage (min)	87.697
RESULTS_SEARCH_STAT_task_focusing_time_cpu	CPU Time Duration for Mid-Pro Group Algorithm Stage (ms)		1		191850		msec to min	1.66667e-05		Statistics - Processing Times - Duration in CPU Time	CPU time duration - Mid-Pro Group Algorithm stage (min)	3.1975
RESULTS_SEARCH_STAT_task_taglet_exe_time_cpu	CPU Time Duration for Taglet Algorithm Stage (ms)		1		6051684		msec to min	1.66667e-05		Statistics - Processing Times - Duration in CPU Time	CPU time duration - Taglet Algorithm stage (min)	100.861
RESULTS_SEARCH_STAT_task_progroup_time_cpu	CPU Time Duration for Pro Group Algorithm Stage (ms)		1		337742		msec to min	1.66667e-05		Statistics - Processing Times - Duration in CPU Time	CPU time duration - Pro Group Algorithm stage (min)	5.62903
				1						Statistics - Processing Times - Percent by Stage	Percent of clock time - Identification Algorithm stages	0.0819536
				1						Statistics - Processing Times - Percent by Stage	Percent of clock time - Signal Processing stage	0.914902
				1						Statistics - Processing Times - Percent by Stage	Percent of clock time - Waiting stage	0.00190157
				1						Statistics - Processing Times - Percent by Stage	Percent of clock time - Fraglet Algorithm stage	0.012409
				1						Statistics - Processing Times - Percent by Stage	Percent of clock time - Mid-Pro Group Algorithm stage	0.00353725
				1						Statistics - Processing Times - Percent by Stage	Percent of clock time - Taglet Algorithm stage	0.0328536
				1						Statistics - Processing Times - Percent by Stage	Percent of clock time - Pro Group Algorithm stage	0.003585
				1						Statistics - Processing Times - Percent by Stage	Percent of clock time - FDR Analysis	0.00122175
				1						Statistics - Processing Rate - Clock (Sec/Spectrum)	Clock time rate (sec/spect) - Full Search	1.11722
				1						Statistics - Processing Rate - Clock (Sec/Spectrum)	Clock time rate (sec/spect) - Identification Algorithm stages	0.0915605
				1						Statistics - Processing Rate - Clock (Sec/Spectrum)	Clock time rate (sec/spect) - Signal processing stage	1.02215
				1						Statistics - Processing Rate - Clock (Sec/Spectrum)	Clock time rate (sec/spect) - Waiting stage	0.00212448
				1						Statistics - Processing Rate - Clock (Sec/Spectrum)	Clock time rate (sec/spect) - Fraglet Algorithm stage	0.0138636
				1						Statistics - Processing Rate - Clock (Sec/Spectrum)	Clock time rate (sec/spect) - Mid-Pro Group Algorithm stage	0.0039519
				1						Statistics - Processing Rate - Clock (Sec/Spectrum)	Clock time rate (sec/spect) - Taglet Algorithm stage	0.0367049
				1						Statistics - Processing Rate - Clock (Sec/Spectrum)	Clock time rate (sec/spect) - Pro Group Algorithm stage	0.00400525
				1						Statistics - Processing Rate - Clock (Sec/Spectrum)	Clock time rate (sec/spect) - FDR Analysis	0.00136497
				1						Statistics - Processing Rate - CPU (Sec/Spectrum)	CPU time rate (sec/spect) - Signal processing stage
				1						Statistics - Processing Rate - CPU (Sec/Spectrum)	CPU time rate (sec/spect) - Fraglet Algorithm stage	0.0638183
				1						Statistics - Processing Rate - CPU (Sec/Spectrum)	CPU time rate (sec/spect) - Mid-Pro Group Algorithm stage	0.00232686
				1						Statistics - Processing Rate - CPU (Sec/Spectrum)	CPU time rate (sec/spect) - Taglet Algorithm stage	0.0733982
				1						Statistics - Processing Rate - CPU (Sec/Spectrum)	CPU time rate (sec/spect) - Pro Group Algorithm stage	0.00409633
				1						Statistics - Processing Rate - Clock (Sec/Spectrum/DB Protein)	Clock time rate (sec/spect/DB protein) - Full search	7.42717e-06
				1						Statistics - Processing Rate - Clock (Sec/Spectrum/DB Protein)	Clock time rate (sec/spect/DB protein) - Identification algorithm stages	6.08683e-07
				1						Statistics - Processing Rate - Clock (Sec/Spectrum/DB Protein)	Clock time rate (sec/spect/DB protein) - Signal processing stage	6.79513e-06
				1						Statistics - Processing Rate - Clock (Sec/Spectrum/DB Protein)	Clock time rate (sec/spect/DB protein) - Waiting stage	1.41232e-08
				1						Statistics - Processing Rate - Clock (Sec/Spectrum/DB Protein)	Clock time rate (sec/spect/DB protein) - Fraglet Algorithm stage	9.21636e-08
				1						Statistics - Processing Rate - Clock (Sec/Spectrum/DB Protein)	Clock time rate (sec/spect/DB protein) - Mid-Pro Group Algorithm stage	2.62717e-08
				1						Statistics - Processing Rate - Clock (Sec/Spectrum/DB Protein)	Clock time rate (sec/spect/DB protein) - Taglet Algorithm stage	2.44009e-07
				1						Statistics - Processing Rate - Clock (Sec/Spectrum/DB Protein)	Clock time rate (sec/spect/DB protein) - Pro Group Algorithm stage	2.66264e-08
				1						Statistics - Processing Rate - Clock (Sec/Spectrum/DB Protein)	Clock time rate (sec/spect/DB protein) - FDR Analysis	9.07417e-09
				1						Statistics - Processing Rate - CPU (Sec/Spectrum/DB Protein)	CPU time rate (sec/spect/DB protein) - Signal processing stage
				1						Statistics - Processing Rate - CPU (Sec/Spectrum/DB Protein)	CPU time rate (sec/spect/DB protein) - Fraglet Algorithm stage	4.24256e-07
				1						Statistics - Processing Rate - CPU (Sec/Spectrum/DB Protein)	CPU time rate (sec/spect/DB protein) - Mid-Pro Group Algorithm stage	1.54687e-08
				1						Statistics - Processing Rate - CPU (Sec/Spectrum/DB Protein)	CPU time rate (sec/spect/DB protein) - Taglet Algorithm stage	4.87942e-07
				1						Statistics - Processing Rate - CPU (Sec/Spectrum/DB Protein)	CPU time rate (sec/spect/DB protein) - Pro Group Algorithm stage	2.72319e-08
				1						Statistics - Extent of Distribution - Fundamental	Distribution factor - CPU vs. clock time - Signal processing stage
				1						Statistics - Extent of Distribution - Fundamental	Distribution factor - CPU vs. clock time - Fraglet Algorithm stage	4.6033
				1						Statistics - Extent of Distribution - Fundamental	Distribution factor - CPU vs. clock time - Mid-Pro Group Algorithm stage	0.588797
				1						Statistics - Extent of Distribution - Fundamental	Distribution factor - CPU vs. clock time - Taglet Algorithm stage	1.99969
				1						Statistics - Extent of Distribution - Fundamental	Distribution factor - CPU vs. clock time - Pro Group Algorithm stage	1.02274
				1						Statistics - Extent of Distribution - vs Segments	Ratio of distribution factor to number of search segments - Signal processing stage
				1						Statistics - Extent of Distribution - vs Segments	Ratio of distribution factor to number of search segments - Fraglet Algorithm stage	0.148493
				1						Statistics - Extent of Distribution - vs Segments	Ratio of distribution factor to number of search segments - Mid-Pro Group Algorithm stage	0.0189934
				1						Statistics - Extent of Distribution - vs Segments	Ratio of distribution factor to number of search segments - Taglet Algorithm stage	0.064506
				1						Statistics - Extent of Distribution - vs Segments	Ratio of distribution factor to number of search segments - Pro Group Algorithm stage	0.0329916
				1						Statistics - Extent of Distribution - vs Licensed Cores	Ratio of distribution factor to number of licensed cores - Signal processing stage
				1						Statistics - Extent of Distribution - vs Licensed Cores	Ratio of distribution factor to number of licensed cores - Fraglet Algorithm stage	0.287706
				1						Statistics - Extent of Distribution - vs Licensed Cores	Ratio of distribution factor to number of licensed cores - Mid-Pro Group Algorithm stage	0.0367998
				1						Statistics - Extent of Distribution - vs Licensed Cores	Ratio of distribution factor to number of licensed cores - Taglet Algorithm stage	0.12498
				1						Statistics - Extent of Distribution - vs Licensed Cores	Ratio of distribution factor to number of licensed cores - Pro Group Algorithm stage	0.0639212
PARAMETERS_PEAKLIST_original_count	Average number of spectra per segment	1	1	1	2659.68					Statistics - Search Segmentation	Average number of spectra per segment	2659.68
PARAMETERS_PEAKLIST_original_count	Standard deviation of number of spectra per segment	1	1	1	619.465					Statistics - Search Segmentation	Standard deviation of number of spectra per segment	619.465
PARAMETERS_PEAKLIST_original_count	Maximum number of spectra per segment	1	1	1	3741					Statistics - Search Segmentation	Maximum number of spectra per segment	3741
PARAMETERS_PEAKLIST_original_count	Minimum number of spectra per segment	1	1	1	762					Statistics - Search Segmentation	Minimum number of spectra per segment	762
										Attributes - Input data filenames	Filename of Input File 1	C:\AB SCIEX\ProteinPilot Data\Results\Albert\ZX 20200624 6600\ZX 20200624 C4A 1.wiff
										Attributes - Input data filenames	Filename of Input File 2	C:\AB SCIEX\ProteinPilot Data\Results\Albert\ZX 20200624 6600\ZX 20200624 C4A 2.wiff
										Attributes - Input data filenames	Filename of Input File 3	C:\AB SCIEX\ProteinPilot Data\Results\Albert\ZX 20200624 6600\ZX 20200624 C4A 3.wiff
										Attributes - Input data filenames	Filename of Input File 4	C:\AB SCIEX\ProteinPilot Data\Results\Albert\ZX 20200624 6600\ZX 20200624 C4A 4.wiff
										Attributes - Input data filenames	Filename of Input File 5	C:\AB SCIEX\ProteinPilot Data\Results\Albert\ZX 20200624 6600\ZX 20200624 C4A 5.wiff
										Attributes - Input data filenames	Filename of Input File 6	C:\AB SCIEX\ProteinPilot Data\Results\Albert\ZX 20200624 6600\ZX 20200624 C4A 6.wiff
										Attributes - Input data filenames	Filename of Input File 7	C:\AB SCIEX\ProteinPilot Data\Results\Albert\ZX 20200624 6600\ZX 20200624 C4A 7.wiff
										Attributes - Input data filenames	Filename of Input File 8	C:\AB SCIEX\ProteinPilot Data\Results\Albert\ZX 20200624 6600\ZX 20200624 C4A 8.wiff
										Attributes - Input data filenames	Filename of Input File 9	C:\AB SCIEX\ProteinPilot Data\Results\Albert\ZX 20200624 6600\ZX 20200624 C4A 9.wiff
										Attributes - Input data filenames	Filename of Input File 10	C:\AB SCIEX\ProteinPilot Data\Results\Albert\ZX 20200624 6600\ZX 20200624 C4A 10.wiff
										Attributes - Input data filenames	Filename of Input File 11	C:\AB SCIEX\ProteinPilot Data\Results\Albert\ZX 20200624 6600\ZX 20200624 C4A 11.wiff
										Attributes - Input data filenames	Filename of Input File 12	C:\AB SCIEX\ProteinPilot Data\Results\Albert\ZX 20200819 6600\ZX 20200819 6600 C4A 1.wiff
										Attributes - Input data filenames	Filename of Input File 13	C:\AB SCIEX\ProteinPilot Data\Results\Albert\ZX 20200819 6600\ZX 20200819 6600 C4A 2.wiff
										Attributes - Input data filenames	Filename of Input File 14	C:\AB SCIEX\ProteinPilot Data\Results\Albert\ZX 20200819 6600\ZX 20200819 6600 C4A 3.wiff
										Attributes - Input data filenames	Filename of Input File 15	C:\AB SCIEX\ProteinPilot Data\Results\Albert\ZX 20200819 6600\ZX 20200819 6600 C4A 4.wiff
										Attributes - Input data filenames	Filename of Input File 16	C:\AB SCIEX\ProteinPilot Data\Results\Albert\ZX 20200819 6600\ZX 20200819 6600 C4A 5.wiff
										Attributes - Input data filenames	Filename of Input File 17	C:\AB SCIEX\ProteinPilot Data\Results\Albert\ZX 20200819 6600\ZX 20200819 6600 C4A 6.wiff
										Attributes - Input data filenames	Filename of Input File 18	C:\AB SCIEX\ProteinPilot Data\Results\Albert\ZX 20200819 6600\ZX 20200819 6600 C4A 7.wiff
										Attributes - Input data filenames	Filename of Input File 19	C:\AB SCIEX\ProteinPilot Data\Results\Albert\ZX 20200819 6600\ZX 20200819 6600 C4A 8.wiff
										Attributes - Input data filenames	Filename of Input File 20	C:\AB SCIEX\ProteinPilot Data\Results\Albert\ZX 20200819 6600\ZX 20200819 6600 C4A 9.wiff
										Attributes - Input data filenames	Filename of Input File 21	C:\AB SCIEX\ProteinPilot Data\Results\Albert\ZX 20200819 6600\ZX 20200819 6600 C4A 10.wiff
										Attributes - Input data filenames	Filename of Input File 22	C:\AB SCIEX\ProteinPilot Data\Results\Albert\ZX 20200819 6600\ZX 20200819 6600 C4A 11.wiff
										Attributes - Input data filenames	Filename of Input File 23	C:\AB SCIEX\ProteinPilot Data\Results\Albert\ZX 20200819 6600\ZX 20200819 6600 C4A 12.wiff
										Attributes - Input data filenames	Filename of Input File 24	C:\AB SCIEX\ProteinPilot Data\Results\Albert\ZX 20200819 6600\ZX 20200819 6600 C4A 13.wiff
										Attributes - Input data filenames	Filename of Input File 25	C:\AB SCIEX\ProteinPilot Data\Results\Albert\ZX 20200819 6600\ZX 20200819 6600 C4A 14.wiff
										Attributes - Input data filenames	Filename of Input File 26	C:\AB SCIEX\ProteinPilot Data\Results\Albert\ZX 20200819 6600\ZX 20200819 6600 C4A 15.wiff
										Attributes - Input data filenames	Filename of Input File 27
										Attributes - Input data filenames	Filename of Input File 28
										Attributes - Input data filenames	Filename of Input File 29
										Attributes - Input data filenames	Filename of Input File 30
										Attributes - Input data filenames	Filename of Input File 31
										Attributes - Input data filenames	Filename of Input File 32
										Attributes - Input data filenames	Filename of Input File 33
										Attributes - Input data filenames	Filename of Input File 34
										Attributes - Input data filenames	Filename of Input File 35
										Attributes - Input data filenames	Filename of Input File 36
										Attributes - Input data filenames	Filename of Input File 37
										Attributes - Input data filenames	Filename of Input File 38
										Attributes - Input data filenames	Filename of Input File 39
										Attributes - Input data filenames	Filename of Input File 40
										Attributes - Input data filenames	Filename of Input File 41
										Attributes - Input data filenames	Filename of Input File 42
										Attributes - Input data filenames	Filename of Input File 43
										Attributes - Input data filenames	Filename of Input File 44
										Attributes - Input data filenames	Filename of Input File 45
										Attributes - Input data filenames	Filename of Input File 46
										Attributes - Input data filenames	Filename of Input File 47
										Attributes - Input data filenames	Filename of Input File 48
										Attributes - Input data filenames	Filename of Input File 49
										Attributes - Input data filenames	Filename of Input File 50
										Attributes - Input data filenames	Filename of Input File 51
										Attributes - Input data filenames	Filename of Input File 52
										Attributes - Input data filenames	Filename of Input File 53
										Attributes - Input data filenames	Filename of Input File 54
										Attributes - Input data filenames	Filename of Input File 55
										Attributes - Input data filenames	Filename of Input File 56
										Attributes - Input data filenames	Filename of Input File 57
										Attributes - Input data filenames	Filename of Input File 58
										Attributes - Input data filenames	Filename of Input File 59
										Attributes - Input data filenames	Filename of Input File 60
										Attributes - Input data filenames	Filename of Input File 61
										Attributes - Input data filenames	Filename of Input File 62
										Attributes - Input data filenames	Filename of Input File 63
										Attributes - Input data filenames	Filename of Input File 64
										Attributes - Input data filenames	Filename of Input File 65
										Attributes - Input data filenames	Filename of Input File 66
										Attributes - Input data filenames	Filename of Input File 67
										Attributes - Input data filenames	Filename of Input File 68
										Attributes - Input data filenames	Filename of Input File 69
										Attributes - Input data filenames	Filename of Input File 70
										Attributes - Input data filenames	Filename of Input File 71
										Attributes - Input data filenames	Filename of Input File 72
										Attributes - Input data filenames	Filename of Input File 73
										Attributes - Input data filenames	Filename of Input File 74
										Attributes - Input data filenames	Filename of Input File 75
										Attributes - Input data filenames	Filename of Input File 76
										Attributes - Input data filenames	Filename of Input File 77
										Attributes - Input data filenames	Filename of Input File 78
										Attributes - Input data filenames	Filename of Input File 79
										Attributes - Input data filenames	Filename of Input File 80
										Attributes - Input data filenames	Filename of Input File 81
										Attributes - Input data filenames	Filename of Input File 82
										Attributes - Input data filenames	Filename of Input File 83
										Attributes - Input data filenames	Filename of Input File 84
										Attributes - Input data filenames	Filename of Input File 85
										Attributes - Input data filenames	Filename of Input File 86
										Attributes - Input data filenames	Filename of Input File 87
										Attributes - Input data filenames	Filename of Input File 88
										Attributes - Input data filenames	Filename of Input File 89
										Attributes - Input data filenames	Filename of Input File 90
										Attributes - Input data filenames	Filename of Input File 91
										Attributes - Input data filenames	Filename of Input File 92
										Attributes - Input data filenames	Filename of Input File 93
										Attributes - Input data filenames	Filename of Input File 94
										Attributes - Input data filenames	Filename of Input File 95
										Attributes - Input data filenames	Filename of Input File 96
										Attributes - Input data filenames	Filename of Input File 97
										Attributes - Input data filenames	Filename of Input File 98
										Attributes - Input data filenames	Filename of Input File 99
										Attributes - Input data filenames	Filename of Input File 100
										Attributes - Input data filenames	Filename of Input File 101
										Attributes - Input data filenames	Filename of Input File 102
										Attributes - Input data filenames	Filename of Input File 103
										Attributes - Input data filenames	Filename of Input File 104
										Attributes - Input data filenames	Filename of Input File 105
										Attributes - Input data filenames	Filename of Input File 106
										Attributes - Input data filenames	Filename of Input File 107
										Attributes - Input data filenames	Filename of Input File 108
										Attributes - Input data filenames	Filename of Input File 109
										Attributes - Input data filenames	Filename of Input File 110
										Attributes - Input data filenames	Filename of Input File 111
										Attributes - Input data filenames	Filename of Input File 112
										Attributes - Input data filenames	Filename of Input File 113
										Attributes - Input data filenames	Filename of Input File 114
										Attributes - Input data filenames	Filename of Input File 115
										Attributes - Input data filenames	Filename of Input File 116
										Attributes - Input data filenames	Filename of Input File 117
										Attributes - Input data filenames	Filename of Input File 118
										Attributes - Input data filenames	Filename of Input File 119
										Attributes - Input data filenames	Filename of Input File 120
										Attributes - Input data filenames	Filename of Input File 121
										Attributes - Input data filenames	Filename of Input File 122
										Attributes - Input data filenames	Filename of Input File 123
										Attributes - Input data filenames	Filename of Input File 124
										Attributes - Input data filenames	Filename of Input File 125
										Attributes - Input data filenames	Filename of Input File 126
										Attributes - Input data filenames	Filename of Input File 127
										Attributes - Input data filenames	Filename of Input File 128
										Attributes - Input data filenames	Filename of Input File 129
										Attributes - Input data filenames	Filename of Input File 130
										Attributes - Input data filenames	Filename of Input File 131
										Attributes - Input data filenames	Filename of Input File 132
										Attributes - Input data filenames	Filename of Input File 133
										Attributes - Input data filenames	Filename of Input File 134
										Attributes - Input data filenames	Filename of Input File 135
										Attributes - Input data filenames	Filename of Input File 136
										Attributes - Input data filenames	Filename of Input File 137
										Attributes - Input data filenames	Filename of Input File 138
										Attributes - Input data filenames	Filename of Input File 139
										Attributes - Input data filenames	Filename of Input File 140
										Attributes - Input data filenames	Filename of Input File 141
										Attributes - Input data filenames	Filename of Input File 142
										Attributes - Input data filenames	Filename of Input File 143
										Attributes - Input data filenames	Filename of Input File 144
										Attributes - Input data filenames	Filename of Input File 145
										Attributes - Input data filenames	Filename of Input File 146
										Attributes - Input data filenames	Filename of Input File 147
										Attributes - Input data filenames	Filename of Input File 148
										Attributes - Input data filenames	Filename of Input File 149
										Attributes - Input data filenames	Filename of Input File 150
										Attributes - Input data filenames	Filename of Input File 151
										Attributes - Input data filenames	Filename of Input File 152
										Attributes - Input data filenames	Filename of Input File 153
										Attributes - Input data filenames	Filename of Input File 154
										Attributes - Input data filenames	Filename of Input File 155
										Attributes - Input data filenames	Filename of Input File 156
										Attributes - Input data filenames	Filename of Input File 157
										Attributes - Input data filenames	Filename of Input File 158
										Attributes - Input data filenames	Filename of Input File 159
										Attributes - Input data filenames	Filename of Input File 160
										Attributes - Input data filenames	Filename of Input File 161
										Attributes - Input data filenames	Filename of Input File 162
										Attributes - Input data filenames	Filename of Input File 163
										Attributes - Input data filenames	Filename of Input File 164
										Attributes - Input data filenames	Filename of Input File 165
										Attributes - Input data filenames	Filename of Input File 166
										Attributes - Input data filenames	Filename of Input File 167
										Attributes - Input data filenames	Filename of Input File 168
										Attributes - Input data filenames	Filename of Input File 169
										Attributes - Input data filenames	Filename of Input File 170
										Attributes - Input data filenames	Filename of Input File 171
										Attributes - Input data filenames	Filename of Input File 172
										Attributes - Input data filenames	Filename of Input File 173
										Attributes - Input data filenames	Filename of Input File 174
										Attributes - Input data filenames	Filename of Input File 175
										Attributes - Input data filenames	Filename of Input File 176
										Attributes - Input data filenames	Filename of Input File 177
										Attributes - Input data filenames	Filename of Input File 178
										Attributes - Input data filenames	Filename of Input File 179
										Attributes - Input data filenames	Filename of Input File 180
										Attributes - Input data filenames	Filename of Input File 181
										Attributes - Input data filenames	Filename of Input File 182
										Attributes - Input data filenames	Filename of Input File 183
										Attributes - Input data filenames	Filename of Input File 184
										Attributes - Input data filenames	Filename of Input File 185
										Attributes - Input data filenames	Filename of Input File 186
										Attributes - Input data filenames	Filename of Input File 187
										Attributes - Input data filenames	Filename of Input File 188
										Attributes - Input data filenames	Filename of Input File 189
										Attributes - Input data filenames	Filename of Input File 190
										Attributes - Input data filenames	Filename of Input File 191
										Attributes - Input data filenames	Filename of Input File 192
										Attributes - Input data filenames	Filename of Input File 193
										Attributes - Input data filenames	Filename of Input File 194
										Attributes - Input data filenames	Filename of Input File 195
										Attributes - Input data filenames	Filename of Input File 196
										Attributes - Input data filenames	Filename of Input File 197
										Attributes - Input data filenames	Filename of Input File 198
										Attributes - Input data filenames	Filename of Input File 199
										Attributes - Input data filenames	Filename of Input File 200

## Sheet: Protein Level Data
Protein Level Data	Unused ProtScore Threshold	Confidence Threshold	Forward	Reverse	Correct	Incorrect	Total	Global FDR	q-value	Fit Unused ProtScore Threshold	Fit Confidence Threshold	Fit Forward	Fit Reverse	Fit Correct	Fit Incorrect	Fit Total	Fit Global FDR	Fit Local FDR
	122.02	1	1	0	1	0	1	0	0	122.02	1	0.999993	6.61929e-06	0.999987	1.32386e-05	1	1.32386e-05	1.32543e-05
	56.89	1	2	0	2	0	2	0	0	56.89	1	1.99999	1.32543e-05	1.99997	2.65086e-05	2	1.32543e-05	1.327e-05
	49.25	1	3	0	3	0	3	0	0	49.25	1	2.99998	1.9905e-05	2.99996	3.981e-05	3	1.327e-05	1.33014e-05
	32.31	1	4	0	4	0	4	0	0	32.31	1	3.99997	2.65715e-05	3.99995	5.3143e-05	4	1.32857e-05	1.33329e-05
	23	1	5	0	5	0	5	0	0	23	1	4.99997	3.32537e-05	4.99993	6.65075e-05	5	1.33015e-05	1.33645e-05
	20.44	1	6	0	6	0	6	0	0	20.44	1	5.99996	3.99518e-05	5.99992	7.99036e-05	6	1.33173e-05	1.33961e-05
	18.31	1	7	0	7	0	7	0	0	18.31	1	6.99995	4.66657e-05	6.99991	9.33314e-05	7	1.33331e-05	1.34278e-05
	18.17	1	8	0	8	0	8	0	0	18.17	1	7.99995	5.33954e-05	7.99989	0.000106791	8	1.33489e-05	1.34595e-05
	13.74	1	9	0	9	0	9	0	0	13.74	1	8.99994	6.0141e-05	8.99988	0.000120282	9	1.33647e-05	1.34912e-05
	11.4	1	10	0	10	0	10	0	0	11.4	1	9.99993	6.69026e-05	9.99987	0.000133805	10	1.33805e-05	1.3523e-05
	10.83	1	11	0	11	0	11	0	0	10.83	1	10.9999	7.368e-05	10.9999	0.00014736	11	1.33964e-05	1.35549e-05
	10.05	1	12	0	12	0	12	0	0	10.05	1	11.9999	8.04734e-05	11.9998	0.000160947	12	1.34122e-05	1.35868e-05
	10.01	1	13	0	13	0	13	0	0	10.01	1	12.9999	8.72828e-05	12.9998	0.000174566	13	1.34281e-05	1.36188e-05
	10	1	15	0	15	0	15	0	0	10	1	13.9999	9.41082e-05	13.9998	0.000188216	14	1.3444e-05	1.36668e-05
	8.82	1	16	0	16	0	16	0	0	10	1	14.9999	0.00010095	14.9998	0.000201899	15	1.34599e-05	1.36668e-05
	8.44	1	17	0	17	0	17	0	0	8.82	1	15.9999	0.000107807	15.9998	0.000215614	16	1.34759e-05	1.37149e-05
	8	1	18	0	18	0	18	0	0	8.44	1	16.9999	0.000114681	16.9998	0.000229361	17	1.34918e-05	1.37471e-05
	7.98	1	19	0	19	0	19	0	0	8	1	17.9999	0.00012157	17.9998	0.000243141	18	1.35078e-05	1.37793e-05
	6	0.999999	21	0	21	0	21	0	0	7.98	1	18.9999	0.000128476	18.9997	0.000256952	19	1.35238e-05	1.38116e-05
	5.56	0.999997	22	0	22	0	22	0	0	6	0.999999	19.9999	0.000135398	19.9997	0.000270796	20	1.35398e-05	1.386e-05
	4.71	0.999981	23	0	23	0	23	0	0	6	0.999999	20.9999	0.000142336	20.9997	0.000284672	21	1.35558e-05	1.386e-05
	4.45	0.999965	24	0	24	0	24	0	0	5.56	0.999997	21.9999	0.00014929	21.9997	0.000298581	22	1.35719e-05	1.39086e-05
	4.04	0.999909	25	0	25	0	25	0	0	4.71	0.999981	22.9998	0.000156261	22.9997	0.000312522	23	1.35879e-05	1.39411e-05
	4.01	0.999902	26	0	26	0	26	0	0	4.45	0.999965	23.9998	0.000163248	23.9997	0.000326496	24	1.3604e-05	1.39736e-05
	4	0.9999	29	0	29	0	29	0	0	4.04	0.999909	24.9998	0.000170251	24.9997	0.000340502	25	1.36201e-05	1.40062e-05
	3.74	0.999818	30	0	30	0	30	0	0	4.01	0.999902	25.9998	0.00017727	25.9996	0.000354541	26	1.36362e-05	1.40388e-05
	3.57	0.999731	31	0	31	0	31	0	0	4	0.9999	26.9998	0.000184306	26.9996	0.000368612	27	1.36523e-05	1.41041e-05
	3.29	0.999487	32	0	32	0	32	0	0	4	0.9999	27.9998	0.000191358	27.9996	0.000382716	28	1.36684e-05	1.41041e-05
	2.47	0.996612	33	0	33	0	33	0	0	4	0.9999	28.9998	0.000198427	28.9996	0.000396853	29	1.36846e-05	1.41041e-05
	2.37	0.995734	34	0	34	0	34	0	0	3.74	0.999818	29.9998	0.000205511	29.9996	0.000411023	30	1.37008e-05	1.41697e-05
	2.35	0.995533	35	0	35	0	35	0	0	3.57	0.999731	30.9998	0.000212613	30.9996	0.000425225	31	1.37169e-05	1.42026e-05
	2.27	0.99463	36	0	36	0	36	0	0	3.29	0.999487	31.9998	0.00021973	31.9996	0.000439461	32	1.37331e-05	1.42355e-05
	2.1	0.992057	37	0	37	0	37	0	0	2.47	0.996612	32.9998	0.000226865	32.9995	0.000453729	33	1.37494e-05	1.42684e-05
	2	0.99	57	0	57	0	57	0	0	2.37	0.995734	33.9998	0.000234015	33.9995	0.000468031	34	1.37656e-05	1.43014e-05
	1.92	0.987977	58	0	58	0	58	0	0	2.35	0.995533	34.9998	0.000241183	34.9995	0.000482365	35	1.37819e-05	1.43345e-05
	1.1	0.920567	58	1	57	2	59	0.0338983	0.0327869	2.27	0.99463	35.9998	0.000248366	35.9995	0.000496733	36	1.37981e-05	1.43676e-05
	1.05	0.910875	59	1	58	2	60	0.0333333	0.0327869	2.1	0.992057	36.9997	0.000255567	36.9995	0.000511133	37	1.38144e-05	1.44007e-05
	0.95	0.887798	60	1	59	2	61	0.0327869	0.0327869	2	0.99	37.9997	0.000262784	37.9995	0.000525567	38	1.38307e-05	1.47518e-05
	0.87	0.865104	60	2	58	4	62	0.0645161	0.056338	2	0.99	38.9997	0.000270017	38.9995	0.000540035	39	1.3847e-05	1.47518e-05
	0.69	0.795826	61	2	59	4	63	0.0634921	0.056338	2	0.99	39.9997	0.000277268	39.9994	0.000554535	40	1.38634e-05	1.47518e-05
	0.62	0.760117	62	2	60	4	64	0.0625	0.056338	2	0.99	40.9997	0.000284534	40.9994	0.000569069	41	1.38797e-05	1.47518e-05
	0.57	0.730847	63	2	61	4	65	0.0615385	0.056338	2	0.99	41.9997	0.000291818	41.9994	0.000583636	42	1.38961e-05	1.47518e-05
	0.53	0.704879	64	2	62	4	66	0.0606061	0.056338	2	0.99	42.9997	0.000299118	42.9994	0.000598237	43	1.39125e-05	1.47518e-05
	0.49	0.676406	66	2	64	4	68	0.0588235	0.056338	2	0.99	43.9997	0.000306435	43.9994	0.000612871	44	1.39289e-05	1.47518e-05
	0.48	0.668869	67	2	65	4	69	0.057971	0.056338	2	0.99	44.9997	0.000313769	44.9994	0.000627539	45	1.39453e-05	1.47518e-05
	0.47	0.661156	68	2	66	4	70	0.0571429	0.056338	2	0.99	45.9997	0.00032112	45.9994	0.00064224	46	1.39617e-05	1.47518e-05
	0.43	0.628465	69	2	67	4	71	0.056338	0.056338	2	0.99	46.9997	0.000328487	46.9993	0.000656975	47	1.39782e-05	1.47518e-05
	0.39	0.59262	69	3	66	6	72	0.0833333	0.0833333	2	0.99	47.9997	0.000335872	47.9993	0.000671743	48	1.39947e-05	1.47518e-05
	0.25	0.437659	71	4	67	8	75	0.106667	0.103896	2	0.99	48.9997	0.000343273	48.9993	0.000686546	49	1.40111e-05	1.47518e-05
	0.23	0.411156	73	4	69	8	77	0.103896	0.103896	2	0.99	49.9996	0.000350691	49.9993	0.000701382	50	1.40276e-05	1.47518e-05
	0.21	0.383405	73	5	68	10	78	0.128205	0.117647	2	0.99	50.9996	0.000358126	50.9993	0.000716252	51	1.40442e-05	1.47518e-05
	0.17	0.323917	74	5	69	10	79	0.126582	0.117647	2	0.99	51.9996	0.000365578	51.9993	0.000731156	52	1.40607e-05	1.47518e-05
	0.16	0.308169	75	5	70	10	80	0.125	0.117647	2	0.99	52.9996	0.000373047	52.9993	0.000746094	53	1.40772e-05	1.47518e-05
	0.14	0.275564	76	5	71	10	81	0.123457	0.117647	2	0.99	53.9996	0.000380533	53.9992	0.000761065	54	1.40938e-05	1.47518e-05
	0.12	0.241422	78	5	73	10	83	0.120482	0.117647	2	0.99	54.9996	0.000388036	54.9992	0.000776071	55	1.41104e-05	1.47518e-05
	0.1	0.205672	80	5	75	10	85	0.117647	0.117647	2	0.99	55.9996	0.000395556	55.9992	0.000791111	56	1.4127e-05	1.47518e-05
	0.08	0.168236	81	8	73	16	89	0.179775	0.179775	2	0.99	56.9996	0.000404222	56.9992	0.000808445	57	1.41832e-05	1.47518e-05
	0.07	0.148862	83	9	74	18	92	0.195652	0.195652	1.92	0.987977	57.9616	0.0384262	57.9231	0.0768525	58	0.00132504	0.0191824
	0.06	0.129036	84	11	73	22	95	0.231579	0.231579	1.1	0.920567	58.8384	0.161558	58.6769	0.323116	59	0.00547655	0.246476
	0.05	0.108749	88	14	74	28	102	0.27451	0.27451	1.05	0.910875	59.708	0.292027	59.4159	0.584055	60	0.00973424	0.260927
										0.95	0.887798	60.5701	0.429859	60.1403	0.859718	61	0.0140937	0.275653
										0.87	0.865104	61.4248	0.575184	60.8496	1.15037	62	0.0185543	0.29064
										0.69	0.795826	62.2719	0.728125	61.5438	1.45625	63	0.0231151	0.305872
										0.62	0.760117	63.1112	0.888796	62.2224	1.77759	64	0.0277749	0.321334
										0.57	0.730847	63.9427	1.0573	62.8854	2.11461	65	0.0325325	0.337009
										0.53	0.704879	64.7662	1.23375	63.5325	2.4675	66	0.0373864	0.352883
										0.49	0.676406	65.5818	1.41822	64.1636	2.83645	67	0.0423351	0.377034
										0.49	0.676406	66.3892	1.61081	64.7784	3.22162	68	0.0473768	0.377034
										0.48	0.668869	67.1884	1.81159	65.3768	3.62318	69	0.0525098	0.40155
										0.47	0.661156	67.9794	2.02063	65.9587	4.04126	70	0.0577323	0.418074
										0.43	0.628465	68.762	2.23799	66.524	4.47599	71	0.0630421	0.434726
										0.39	0.59262	69.5363	2.46374	67.0725	4.92749	72	0.0684373	0.451494
										0.25	0.437659	70.3021	2.69793	67.6041	5.39586	73	0.0739158	0.485327
										0.25	0.437659	71.0594	2.94059	68.1188	5.88119	74	0.0794755	0.485327
										0.25	0.437659	71.8082	3.19178	68.6164	6.38356	75	0.0851141	0.485327
										0.23	0.411156	72.5485	3.45152	69.097	6.90304	76	0.0908295	0.528059
										0.23	0.411156	73.2802	3.71985	69.5603	7.43969	77	0.0966194	0.528059
										0.21	0.383405	74.0032	3.99678	70.0064	7.99356	78	0.102482	0.553867
										0.17	0.323917	74.7177	4.28234	70.4353	8.56469	79	0.108414	0.571123
										0.16	0.308169	75.4235	4.57655	70.8469	9.1531	80	0.114414	0.588408
										0.14	0.275564	76.1206	4.8794	71.2412	9.75881	81	0.120479	0.605713
										0.12	0.241422	76.8091	5.19092	71.6182	10.3818	82	0.126608	0.63169
										0.12	0.241422	77.4889	5.51109	71.9778	11.0222	83	0.132797	0.63169
										0.1	0.205672	78.1601	5.83993	72.3201	11.6799	84	0.139046	0.66632
										0.1	0.205672	78.8226	6.17741	72.6452	12.3548	85	0.145351	0.66632
										0.08	0.168236	79.4765	6.52354	72.9529	13.0471	86	0.15171	1
										0.08	0.168236	80.1217	6.8783	73.2434	13.7566	87	0.158122	1
										0.08	0.168236	80.7583	7.24167	73.5167	14.4833	88	0.164583	1
										0.08	0.168236	81.3864	7.61364	73.7727	15.2273	89	0.171093	1
										0.07	0.148862	82.0058	7.99418	74.0116	15.9884	90	0.177648	1
										0.07	0.148862	82.6167	8.38328	74.2334	16.7666	91	0.184248	1
										0.07	0.148862	83.2191	8.78089	74.4382	17.5618	92	0.190889	1
										0.06	0.129036	83.813	9.187	74.626	18.374	93	0.19757	1
										0.06	0.129036	84.3984	9.60158	74.7968	19.2032	94	0.204289	1
										0.06	0.129036	84.9754	10.0246	74.9508	20.0492	95	0.211044	1
										0.05	0.108749	85.544	10.456	75.088	20.912	96	0.217833	1
										0.05	0.108749	86.1043	10.8957	75.2085	21.7915	97	0.224654	1
										0.05	0.108749	86.6562	11.3438	75.3124	22.6876	98	0.231506	1
										0.05	0.108749	87.1998	11.8002	75.3997	23.6003	99	0.238387	1
										0.05	0.108749	87.7353	12.2647	75.4705	24.5295	100	0.245295	1
										0.05	0.108749	88.2625	12.7375	75.525	25.475	101	0.252228	1
										0.05	0.108749	88.7816	13.2184	75.5631	26.4369	102	0.259185	1

## Sheet: Distinct Peptide Level Data
Distinct Peptide Level Data		Confidence Threshold	Forward	Reverse	Correct	Incorrect	Total	Global FDR	q-value		Fit Confidence Threshold	Fit Forward	Fit Reverse	Fit Correct	Fit Incorrect	Fit Total	Fit Global FDR	Fit Local FDR
		1	45	0	45	0	45	0	0		1	0.999591	0.00040853	0.999183	0.000817059	1	0.000817059	0.000818886
		0.9999	136	0	136	0	136	0	0		1	1.99918	0.000817099	1.99837	0.0016342	2	0.000817099	0.000818886
		0.9998	203	0	203	0	203	0	0		1	2.99877	0.00122571	2.99755	0.00245142	3	0.000817139	0.000818886
		0.9997	204	0	204	0	204	0	0		1	3.99837	0.00163436	3.99673	0.00326872	4	0.000817179	0.000818886
		0.9996	244	0	244	0	244	0	0		1	4.99796	0.00204305	4.99591	0.0040861	5	0.000817219	0.000818886
		0.9995	245	0	245	0	245	0	0		1	5.99755	0.00245178	5.9951	0.00490356	6	0.00081726	0.000818886
		0.9993	257	0	257	0	257	0	0		1	6.99714	0.00286055	6.99428	0.0057211	7	0.0008173	0.000818886
		0.999	258	0	258	0	258	0	0		1	7.99673	0.00326936	7.99346	0.00653872	8	0.00081734	0.000818886
		0.9989	259	0	259	0	259	0	0		1	8.99632	0.00367821	8.99264	0.00735642	9	0.00081738	0.000818886
		0.9987	260	0	260	0	260	0	0		1	9.99591	0.0040871	9.99183	0.0081742	10	0.00081742	0.000818886
		0.9986	262	0	262	0	262	0	0		1	10.9955	0.00449603	10.991	0.00899206	11	0.00081746	0.000818886
		0.9979	264	0	264	0	264	0	0		1	11.9951	0.004905	11.9902	0.00981	12	0.0008175	0.000818886
		0.9976	265	0	265	0	265	0	0		1	12.9947	0.00531401	12.9894	0.010628	13	0.00081754	0.000818886
		0.9974	265	1	264	2	266	0.0075188	0.00584795		1	13.9943	0.00572306	13.9886	0.0114461	14	0.00081758	0.000818886
		0.9971	270	1	269	2	271	0.00738007	0.00584795		1	14.9939	0.00613215	14.9877	0.0122643	15	0.00081762	0.000818886
		0.997	297	1	296	2	298	0.00671141	0.00584795		1	15.9935	0.00654128	15.9869	0.0130826	16	0.00081766	0.000818886
		0.9964	306	1	305	2	307	0.00651466	0.00584795		1	16.993	0.00695045	16.9861	0.0139009	17	0.0008177	0.000818886
		0.9953	309	1	308	2	310	0.00645161	0.00584795		1	17.9926	0.00735966	17.9853	0.0147193	18	0.000817741	0.000818886
		0.9946	311	1	310	2	312	0.00641026	0.00584795		1	18.9922	0.00776892	18.9845	0.0155378	19	0.000817781	0.000818886
		0.9943	321	1	320	2	322	0.00621118	0.00584795		1	19.9918	0.00817821	19.9836	0.0163564	20	0.000817821	0.000818886
		0.9941	323	1	322	2	324	0.00617284	0.00584795		1	20.9914	0.00858755	20.9828	0.0171751	21	0.000817862	0.000818886
		0.9939	324	1	323	2	325	0.00615385	0.00584795		1	21.991	0.00899694	21.982	0.0179939	22	0.000817904	0.000818886
		0.9936	325	1	324	2	326	0.00613497	0.00584795		1	22.9906	0.00940639	22.9812	0.0188128	23	0.000817947	0.000818886
		0.9928	326	1	325	2	327	0.00611621	0.00584795		1	23.9902	0.00981589	23.9804	0.0196318	24	0.000817991	0.000818886
		0.9924	327	1	326	2	328	0.00609756	0.00584795		1	24.9898	0.0102255	24.9795	0.020451	25	0.000818038	0.000818886
		0.9911	328	1	327	2	329	0.00607903	0.00584795		1	25.9894	0.0106352	25.9787	0.0212703	26	0.000818089	0.000818886
		0.991	331	1	330	2	332	0.0060241	0.00584795		1	26.989	0.011045	26.9779	0.0220899	27	0.000818145	0.000818886
		0.9902	332	1	331	2	333	0.00600601	0.00584795		1	27.9885	0.0114549	27.9771	0.0229098	28	0.000818207	0.000818886
		0.9896	333	1	332	2	334	0.00598802	0.00584795		1	28.9881	0.011865	28.9763	0.0237301	29	0.000818279	0.000818886
		0.9892	334	1	333	2	335	0.00597015	0.00584795		1	29.9877	0.0122754	29.9754	0.0245508	30	0.000818361	0.000818886
		0.989	335	1	334	2	336	0.00595238	0.00584795		1	30.9873	0.0126861	30.9746	0.0253722	31	0.000818458	0.000818886
		0.9886	336	1	335	2	337	0.00593472	0.00584795		1	31.9869	0.0130971	31.9738	0.0261943	32	0.000818572	0.000818886
		0.9881	337	1	336	2	338	0.00591716	0.00584795		1	32.9865	0.0135086	32.973	0.0270173	33	0.000818706	0.000818886
		0.9879	338	1	337	2	339	0.00589971	0.00584795		1	33.9861	0.0139207	33.9722	0.0278414	34	0.000818864	0.000818886
		0.9875	339	1	338	2	340	0.00588235	0.00584795		1	34.9857	0.0143334	34.9713	0.0286668	35	0.000819051	0.000818886
		0.9868	341	1	340	2	342	0.00584795	0.00584795		1	35.9853	0.0147469	35.9705	0.0294937	36	0.00081927	0.000818886
		0.9866	341	2	339	4	343	0.0116618	0.010582		1	36.9848	0.0151612	36.9697	0.0303225	37	0.000819526	0.000818886
		0.9857	342	2	340	4	344	0.0116279	0.010582		1	37.9844	0.0155767	37.9688	0.0311533	38	0.000819824	0.000818886
		0.9851	343	2	341	4	345	0.0115942	0.010582		1	38.984	0.0159933	38.968	0.0319866	39	0.000820169	0.000818886
		0.9841	344	2	342	4	346	0.0115607	0.010582		1	39.9836	0.0164113	39.9672	0.0328226	40	0.000820565	0.000818886
		0.9834	346	2	344	4	348	0.0114943	0.010582		1	40.9832	0.0168308	40.9663	0.0336617	41	0.000821017	0.000818886
		0.9826	348	2	346	4	350	0.0114286	0.010582		1	41.9827	0.0172521	41.9655	0.0345043	42	0.000821531	0.000818886
		0.9825	349	2	347	4	351	0.011396	0.010582		1	42.9823	0.0176754	42.9646	0.0353508	43	0.000822111	0.000818886
		0.982	350	2	348	4	352	0.0113636	0.010582		1	43.9819	0.0181008	43.9638	0.0362016	44	0.000822763	0.000818886
		0.981	351	2	349	4	353	0.0113314	0.010582		1	44.9815	0.0185286	44.9629	0.0370571	45	0.000823491	0.000818886
		0.9774	354	2	352	4	356	0.011236	0.010582		0.9999	45.981	0.0189589	45.9621	0.0379178	46	0.000824301	0.00156932
		0.9772	355	2	353	4	357	0.0112045	0.010582		0.9999	46.9806	0.0193921	46.9612	0.0387842	47	0.000825196	0.00156932
		0.9755	356	2	354	4	358	0.0111732	0.010582		0.9999	47.9802	0.0198284	47.9603	0.0396567	48	0.000826182	0.00156932
		0.9748	357	2	355	4	359	0.0111421	0.010582		0.9999	48.9797	0.0202679	48.9595	0.0405359	49	0.000827263	0.00156932
		0.9744	358	2	356	4	360	0.0111111	0.010582		0.9999	49.9793	0.0207111	49.9586	0.0414221	50	0.000828442	0.00156932
		0.9732	359	2	357	4	361	0.0110803	0.010582		0.9999	50.9788	0.021158	50.9577	0.042316	51	0.000829725	0.00156932
		0.9711	360	2	358	4	362	0.0110497	0.010582		0.9999	51.9784	0.021609	51.9568	0.0432179	52	0.000831114	0.00156932
		0.97	361	2	359	4	363	0.0110193	0.010582		0.9999	52.9779	0.0220643	52.9559	0.0441285	53	0.000832613	0.00156932
		0.9696	363	2	361	4	365	0.0109589	0.010582		0.9999	53.9775	0.0225241	53.955	0.0450482	54	0.000834226	0.00156932
		0.967	364	2	362	4	366	0.010929	0.010582		0.9999	54.977	0.0229888	54.954	0.0459776	55	0.000835956	0.00156932
		0.9658	365	2	363	4	367	0.0108992	0.010582		0.9999	55.9765	0.0234586	55.9531	0.0469171	56	0.000837806	0.00156932
		0.9645	374	2	372	4	376	0.0106383	0.010582		0.9999	56.9761	0.0239336	56.9521	0.0478673	57	0.000839777	0.00156932
		0.9625	375	2	373	4	377	0.0106101	0.010582		0.9999	57.9756	0.0244143	57.9512	0.0488286	58	0.000841873	0.00156932
		0.9608	376	2	374	4	378	0.010582	0.010582		0.9999	58.9751	0.0249008	58.9502	0.0498017	59	0.000844096	0.00156932
		0.9593	376	3	373	6	379	0.0158311	0.0143885		0.9999	59.9746	0.0253934	59.9492	0.0507869	60	0.000846448	0.00156932
		0.9592	377	3	374	6	380	0.0157895	0.0143885		0.9999	60.9741	0.0258924	60.9482	0.0517847	61	0.00084893	0.00156932
		0.9583	378	3	375	6	381	0.015748	0.0143885		0.9999	61.9736	0.0263979	61.9472	0.0527958	62	0.000851545	0.00156932
		0.9578	380	3	377	6	383	0.0156658	0.0143885		0.9999	62.9731	0.0269102	62.9462	0.0538204	63	0.000854292	0.00156932
		0.9558	381	3	378	6	384	0.015625	0.0143885		0.9999	63.9726	0.0274296	63.9451	0.0548592	64	0.000857175	0.00156932
		0.9556	382	3	379	6	385	0.0155844	0.0143885		0.9999	64.972	0.0279563	64.9441	0.0559125	65	0.000860193	0.00156932
		0.9542	383	3	380	6	386	0.015544	0.0143885		0.9999	65.9715	0.0284905	65.943	0.0569809	66	0.000863347	0.00156932
		0.9526	385	3	382	6	388	0.0154639	0.0143885		0.9999	66.971	0.0290324	66.9419	0.0580648	67	0.000866638	0.00156932
		0.9524	387	3	384	6	390	0.0153846	0.0143885		0.9999	67.9704	0.0295823	67.9408	0.0591645	68	0.000870067	0.00156932
		0.952	388	3	385	6	391	0.0153453	0.0143885		0.9999	68.9699	0.0301403	68.9397	0.0602807	69	0.000873633	0.00156932
		0.9514	389	3	386	6	392	0.0153061	0.0143885		0.9999	69.9693	0.0307068	69.9386	0.0614136	70	0.000877338	0.00156932
		0.9505	390	3	387	6	393	0.0152672	0.0143885		0.9999	70.9687	0.0312819	70.9374	0.0625638	71	0.00088118	0.00156932
		0.9491	392	3	389	6	395	0.0151899	0.0143885		0.9999	71.9681	0.0318658	71.9363	0.0637315	72	0.00088516	0.00156932
		0.9486	393	3	390	6	396	0.0151515	0.0143885		0.9999	72.9675	0.0324586	72.9351	0.0649173	73	0.000889278	0.00156932
		0.9478	394	3	391	6	397	0.0151134	0.0143885		0.9999	73.9669	0.0330607	73.9339	0.0661215	74	0.000893533	0.00156932
		0.945	395	3	392	6	398	0.0150754	0.0143885		0.9999	74.9663	0.0336722	74.9327	0.0673444	75	0.000897925	0.00156932
		0.9445	396	3	393	6	399	0.0150376	0.0143885		0.9999	75.9657	0.0342933	75.9314	0.0685865	76	0.000902454	0.00156932
		0.9435	397	3	394	6	400	0.015	0.0143885		0.9999	76.9651	0.0349241	76.9302	0.0698481	77	0.000907119	0.00156932
		0.9425	398	3	395	6	401	0.0149626	0.0143885		0.9999	77.9644	0.0355648	77.9289	0.0711297	78	0.000911919	0.00156932
		0.9402	400	3	397	6	403	0.0148883	0.0143885		0.9999	78.9638	0.0362157	78.9276	0.0724314	79	0.000916853	0.00156932
		0.9386	401	3	398	6	404	0.0148515	0.0143885		0.9999	79.9631	0.0368769	79.9262	0.0737537	80	0.000921922	0.00156932
		0.9378	402	3	399	6	405	0.0148148	0.0143885		0.9999	80.9625	0.0375485	80.9249	0.075097	81	0.000927123	0.00156932
		0.9377	403	3	400	6	406	0.0147783	0.0143885		0.9999	81.9618	0.0382307	81.9235	0.0764614	82	0.000932456	0.00156932
		0.9362	404	3	401	6	407	0.014742	0.0143885		0.9999	82.9611	0.0389237	82.9222	0.0778474	83	0.000937921	0.00156932
		0.9354	405	3	402	6	408	0.0147059	0.0143885		0.9999	83.9604	0.0396277	83.9207	0.0792553	84	0.000943516	0.00156932
		0.9353	406	3	403	6	409	0.0146699	0.0143885		0.9999	84.9597	0.0403427	84.9193	0.0806854	85	0.00094924	0.00156932
		0.934	407	3	404	6	410	0.0146341	0.0143885		0.9999	85.9589	0.041069	85.9179	0.082138	86	0.000955093	0.00156932
		0.9334	408	3	405	6	411	0.0145985	0.0143885		0.9999	86.9582	0.0418067	86.9164	0.0836133	87	0.000961073	0.00156932
		0.9312	409	3	406	6	412	0.0145631	0.0143885		0.9999	87.9574	0.0425559	87.9149	0.0851117	88	0.000967179	0.00156932
		0.9304	410	3	407	6	413	0.0145278	0.0143885		0.9999	88.9567	0.0433167	88.9134	0.0866335	89	0.00097341	0.00156932
		0.9288	412	3	409	6	415	0.0144578	0.0143885		0.9999	89.9559	0.0440895	89.9118	0.0881789	90	0.000979766	0.00156932
		0.9277	413	3	410	6	416	0.0144231	0.0143885		0.9999	90.9551	0.0448741	90.9103	0.0897482	91	0.000986244	0.00156932
		0.9274	414	3	411	6	417	0.0143885	0.0143885		0.9999	91.9543	0.0456709	91.9087	0.0913418	92	0.000992845	0.00156932
		0.9249	414	4	410	8	418	0.0191388	0.0190931		0.9999	92.9535	0.0464799	92.907	0.0929597	93	0.000999567	0.00156932
		0.9201	415	4	411	8	419	0.0190931	0.0190931		0.9999	93.9527	0.0473012	93.9054	0.0946024	94	0.00100641	0.00156932
		0.9188	415	5	410	10	420	0.0238095	0.0236407		0.9999	94.9519	0.0481351	94.9037	0.0962701	95	0.00101337	0.00156932
		0.9177	416	5	411	10	421	0.023753	0.0236407		0.9999	95.951	0.0489815	95.902	0.0979631	96	0.00102045	0.00156932
		0.916	417	5	412	10	422	0.0236967	0.0236407		0.9999	96.9502	0.0498408	96.9003	0.0996815	97	0.00102764	0.00156932
		0.9149	418	5	413	10	423	0.0236407	0.0236407		0.9999	97.9493	0.0507129	97.8986	0.101426	98	0.00103496	0.00156932
		0.9093	418	6	412	12	424	0.0283019	0.027088		0.9999	98.9484	0.051598	98.8968	0.103196	99	0.00104238	0.00156932
		0.9076	419	6	413	12	425	0.0282353	0.027088		0.9999	99.9475	0.0524962	99.895	0.104992	100	0.00104992	0.00156932
		0.9068	420	6	414	12	426	0.028169	0.027088		0.9999	100.947	0.0534078	100.893	0.106816	101	0.00105758	0.00156932
		0.8998	421	6	415	12	427	0.028103	0.027088		0.9999	101.946	0.0543326	101.891	0.108665	102	0.00106535	0.00156932
		0.8988	422	6	416	12	428	0.0280374	0.027088		0.9999	102.945	0.055271	102.889	0.110542	103	0.00107322	0.00156932
		0.8964	423	6	417	12	429	0.027972	0.027088		0.9999	103.944	0.0562231	103.888	0.112446	104	0.00108121	0.00156932
		0.8956	424	6	418	12	430	0.027907	0.027088		0.9999	104.943	0.0571888	104.886	0.114378	105	0.00108931	0.00156932
		0.8913	425	6	419	12	431	0.0278422	0.027088		0.9999	105.942	0.0581685	105.884	0.116337	106	0.00109752	0.00156932
		0.8864	426	6	420	12	432	0.0277778	0.027088		0.9999	106.941	0.0591621	106.882	0.118324	107	0.00110583	0.00156932
		0.8825	427	6	421	12	433	0.0277136	0.027088		0.9999	107.94	0.0601699	107.88	0.12034	108	0.00111426	0.00156932
		0.8822	428	6	422	12	434	0.0276498	0.027088		0.9999	108.939	0.0611919	108.878	0.122384	109	0.00112279	0.00156932
		0.8773	429	6	423	12	435	0.0275862	0.027088		0.9999	109.938	0.0622283	109.876	0.124457	110	0.00113142	0.00156932
		0.8765	430	6	424	12	436	0.0275229	0.027088		0.9999	110.937	0.0632791	110.873	0.126558	111	0.00114016	0.00156932
		0.876	431	6	425	12	437	0.02746	0.027088		0.9999	111.936	0.0643446	111.871	0.128689	112	0.00114901	0.00156932
		0.874	432	6	426	12	438	0.0273973	0.027088		0.9999	112.935	0.0654249	112.869	0.13085	113	0.00115796	0.00156932
		0.8723	433	6	427	12	439	0.0273349	0.027088		0.9999	113.933	0.0665199	113.867	0.13304	114	0.00116702	0.00156932
		0.8715	434	6	428	12	440	0.0272727	0.027088		0.9999	114.932	0.06763	114.865	0.13526	115	0.00117617	0.00156932
		0.8671	436	6	430	12	442	0.0271493	0.027088		0.9999	115.931	0.0687552	115.862	0.13751	116	0.00118544	0.00156932
		0.8647	437	6	431	12	443	0.027088	0.027088		0.9999	116.93	0.0698957	116.86	0.139791	117	0.0011948	0.00156932
		0.8643	437	7	430	14	444	0.0315315	0.0281124		0.9999	117.929	0.0710515	117.858	0.142103	118	0.00120426	0.00156932
		0.863	438	7	431	14	445	0.0314607	0.0281124		0.9999	118.928	0.0722229	118.856	0.144446	119	0.00121383	0.00156932
		0.8617	439	7	432	14	446	0.0313901	0.0281124		0.9999	119.927	0.0734099	119.853	0.14682	120	0.0012235	0.00156932
		0.856	441	7	434	14	448	0.03125	0.0281124		0.9999	120.925	0.0746127	120.851	0.149225	121	0.00123327	0.00156932
		0.8547	442	7	435	14	449	0.0311804	0.0281124		0.9999	121.924	0.0758314	121.848	0.151663	122	0.00124314	0.00156932
		0.8502	443	7	436	14	450	0.0311111	0.0281124		0.9999	122.923	0.0770661	122.846	0.154132	123	0.00125311	0.00156932
		0.849	444	7	437	14	451	0.0310421	0.0281124		0.9999	123.922	0.078317	123.843	0.156634	124	0.00126318	0.00156932
		0.8477	448	7	441	14	455	0.0307692	0.0281124		0.9999	124.92	0.0795843	124.841	0.159169	125	0.00127335	0.00156932
		0.8441	449	7	442	14	456	0.0307018	0.0281124		0.9999	125.919	0.080868	125.838	0.161736	126	0.00128362	0.00156932
		0.8431	450	7	443	14	457	0.0306346	0.0281124		0.9999	126.918	0.0821683	126.836	0.164337	127	0.00129399	0.00156932
		0.8379	451	7	444	14	458	0.0305677	0.0281124		0.9999	127.917	0.0834854	127.833	0.166971	128	0.00130446	0.00156932
		0.8342	452	7	445	14	459	0.0305011	0.0281124		0.9999	128.915	0.0848194	128.83	0.169639	129	0.00131503	0.00156932
		0.8329	453	7	446	14	460	0.0304348	0.0281124		0.9999	129.914	0.0861704	129.828	0.172341	130	0.0013257	0.00156932
		0.8271	454	7	447	14	461	0.0303688	0.0281124		0.9999	130.912	0.0875387	130.825	0.175077	131	0.00133647	0.00156932
		0.8248	455	7	448	14	462	0.030303	0.0281124		0.9999	131.911	0.0889243	131.822	0.177849	132	0.00134734	0.00156932
		0.8218	456	7	449	14	463	0.0302376	0.0281124		0.9999	132.91	0.0903275	132.819	0.180655	133	0.00135831	0.00156932
		0.8179	457	7	450	14	464	0.0301724	0.0281124		0.9999	133.908	0.0917483	133.817	0.183497	134	0.00136938	0.00156932
		0.8136	458	7	451	14	465	0.0301075	0.0281124		0.9999	134.907	0.0931869	134.814	0.186374	135	0.00138055	0.00156932
		0.8117	459	7	452	14	466	0.0300429	0.0281124		0.9999	135.905	0.0946435	135.811	0.189287	136	0.00139182	0.00156932
		0.807	460	7	453	14	467	0.0299786	0.0281124		0.9998	136.904	0.0961183	136.808	0.192237	137	0.00140319	0.00437243
		0.7995	461	7	454	14	468	0.0299145	0.0281124		0.9998	137.902	0.0976115	137.805	0.195223	138	0.00141466	0.00437243
		0.7957	462	7	455	14	469	0.0298507	0.0281124		0.9998	138.901	0.0991231	138.802	0.198246	139	0.00142623	0.00437243
		0.7955	463	7	456	14	470	0.0297872	0.0281124		0.9998	139.899	0.100653	139.799	0.201307	140	0.00143791	0.00437243
		0.7887	464	7	457	14	471	0.029724	0.0281124		0.9998	140.898	0.102203	140.796	0.204405	141	0.00144968	0.00437243
		0.7838	465	7	458	14	472	0.029661	0.0281124		0.9998	141.896	0.103771	141.792	0.207541	142	0.00146156	0.00437243
		0.7817	466	7	459	14	473	0.0295983	0.0281124		0.9998	142.895	0.105358	142.789	0.210716	143	0.00147354	0.00437243
		0.7815	467	7	460	14	474	0.0295359	0.0281124		0.9998	143.893	0.106965	143.786	0.21393	144	0.00148562	0.00437243
		0.7763	468	7	461	14	475	0.0294737	0.0281124		0.9998	144.891	0.108591	144.783	0.217183	145	0.00149781	0.00437243
		0.7703	469	7	462	14	476	0.0294118	0.0281124		0.9998	145.89	0.110237	145.78	0.220475	146	0.0015101	0.00437243
		0.7629	470	7	463	14	477	0.0293501	0.0281124		0.9998	146.888	0.111903	146.776	0.223807	147	0.0015225	0.00437243
		0.7601	471	7	464	14	478	0.0292887	0.0281124		0.9998	147.886	0.11359	147.773	0.227179	148	0.001535	0.00437243
		0.7541	472	7	465	14	479	0.0292276	0.0281124		0.9998	148.885	0.115296	148.769	0.230593	149	0.0015476	0.00437243
		0.7523	473	7	466	14	480	0.0291667	0.0281124		0.9998	149.883	0.117024	149.766	0.234047	150	0.00156031	0.00437243
		0.7451	474	7	467	14	481	0.029106	0.0281124		0.9998	150.881	0.118771	150.762	0.237543	151	0.00157313	0.00437243
		0.7396	475	7	468	14	482	0.0290456	0.0281124		0.9998	151.879	0.12054	151.759	0.241081	152	0.00158606	0.00437243
		0.7394	476	7	469	14	483	0.0289855	0.0281124		0.9998	152.878	0.12233	152.755	0.244661	153	0.00159909	0.00437243
		0.7344	479	7	472	14	486	0.0288066	0.0281124		0.9998	153.876	0.124142	153.752	0.248284	154	0.00161223	0.00437243
		0.7289	480	7	473	14	487	0.0287474	0.0281124		0.9998	154.874	0.125975	154.748	0.25195	155	0.00162549	0.00437243
		0.7178	481	7	474	14	488	0.0286885	0.0281124		0.9998	155.872	0.12783	155.744	0.25566	156	0.00163885	0.00437243
		0.7067	482	7	475	14	489	0.0286299	0.0281124		0.9998	156.87	0.129707	156.741	0.259414	157	0.00165232	0.00437243
		0.7066	483	7	476	14	490	0.0285714	0.0281124		0.9998	157.868	0.131606	157.737	0.263213	158	0.0016659	0.00437243
		0.7052	484	7	477	14	491	0.0285132	0.0281124		0.9998	158.866	0.133528	158.733	0.267057	159	0.0016796	0.00437243
		0.7011	485	7	478	14	492	0.0284553	0.0281124		0.9998	159.865	0.135473	159.729	0.270946	160	0.00169341	0.00437243
		0.6966	487	7	480	14	494	0.0283401	0.0281124		0.9998	160.863	0.137441	160.725	0.274881	161	0.00170734	0.00437243
		0.6862	488	7	481	14	495	0.0282828	0.0281124		0.9998	161.861	0.139432	161.721	0.278863	162	0.00172138	0.00437243
		0.6779	489	7	482	14	496	0.0282258	0.0281124		0.9998	162.859	0.141446	162.717	0.282892	163	0.00173553	0.00437243
		0.6722	490	7	483	14	497	0.028169	0.0281124		0.9998	163.857	0.143484	163.713	0.286968	164	0.00174981	0.00437243
		0.67	491	7	484	14	498	0.0281124	0.0281124		0.9998	164.854	0.145546	164.709	0.291093	165	0.0017642	0.00437243
		0.6691	491	8	483	16	499	0.0320641	0.0320641		0.9998	165.852	0.147633	165.705	0.295265	166	0.00177871	0.00437243
		0.6565	491	9	482	18	500	0.036	0.035503		0.9998	166.85	0.149744	166.701	0.299487	167	0.00179334	0.00437243
		0.6511	492	9	483	18	501	0.0359281	0.035503		0.9998	167.848	0.151879	167.696	0.303759	168	0.00180809	0.00437243
		0.647	493	9	484	18	502	0.0358566	0.035503		0.9998	168.846	0.15404	168.692	0.308081	169	0.00182296	0.00437243
		0.6429	494	9	485	18	503	0.0357853	0.035503		0.9998	169.844	0.156227	169.688	0.312453	170	0.00183796	0.00437243
		0.6427	497	9	488	18	506	0.0355731	0.035503		0.9998	170.842	0.158438	170.683	0.316877	171	0.00185308	0.00437243
		0.6419	498	9	489	18	507	0.035503	0.035503		0.9998	171.839	0.160676	171.679	0.321352	172	0.00186833	0.00437243
		0.6415	498	10	488	20	508	0.0393701	0.0392157		0.9998	172.837	0.16294	172.674	0.32588	173	0.0018837	0.00437243
		0.6337	499	10	489	20	509	0.0392927	0.0392157		0.9998	173.835	0.165231	173.67	0.330461	174	0.0018992	0.00437243
		0.6235	500	10	490	20	510	0.0392157	0.0392157		0.9998	174.832	0.167548	174.665	0.335096	175	0.00191483	0.00437243
		0.6131	500	11	489	22	511	0.0430528	0.0426357		0.9998	175.83	0.169892	175.66	0.339785	176	0.0019306	0.00437243
		0.6042	501	11	490	22	512	0.0429688	0.0426357		0.9998	176.828	0.172264	176.655	0.344529	177	0.00194649	0.00437243
		0.5971	502	11	491	22	513	0.042885	0.0426357		0.9998	177.825	0.174664	177.651	0.349328	178	0.00196252	0.00437243
		0.5964	503	11	492	22	514	0.0428016	0.0426357		0.9998	178.823	0.177091	178.646	0.354183	179	0.00197868	0.00437243
		0.5954	504	11	493	22	515	0.0427184	0.0426357		0.9998	179.82	0.179547	179.641	0.359095	180	0.00199497	0.00437243
		0.5939	505	11	494	22	516	0.0426357	0.0426357		0.9998	180.818	0.182032	180.636	0.364064	181	0.0020114	0.00437243
		0.5879	505	12	493	24	517	0.0464217	0.0464217		0.9998	181.815	0.184546	181.631	0.369092	182	0.00202798	0.00437243
		0.5734	505	13	492	26	518	0.0501931	0.0500963		0.9998	182.813	0.187089	182.626	0.374178	183	0.00204469	0.00437243
		0.5732	506	13	493	26	519	0.0500963	0.0500963		0.9998	183.81	0.189662	183.621	0.379324	184	0.00206154	0.00437243
		0.5704	506	14	492	28	520	0.0538462	0.0536398		0.9998	184.808	0.192265	184.615	0.384529	185	0.00207854	0.00437243
		0.5703	507	14	493	28	521	0.0537428	0.0536398		0.9998	185.805	0.194898	185.61	0.389796	186	0.00209568	0.00437243
		0.5649	508	14	494	28	522	0.0536398	0.0536398		0.9998	186.802	0.197562	186.605	0.395124	187	0.00211296	0.00437243
		0.5577	508	15	493	30	523	0.0573614	0.056391		0.9998	187.8	0.200257	187.599	0.400514	188	0.0021304	0.00437243
		0.5494	509	15	494	30	524	0.0572519	0.056391		0.9998	188.797	0.202984	188.594	0.405968	189	0.00214798	0.00437243
		0.5445	510	15	495	30	525	0.0571429	0.056391		0.9998	189.794	0.205742	189.589	0.411485	190	0.00216571	0.00437243
		0.5388	512	15	497	30	527	0.056926	0.056391		0.9998	190.791	0.208533	190.583	0.417067	191	0.00218359	0.00437243
		0.5379	513	15	498	30	528	0.0568182	0.056391		0.9998	191.789	0.211357	191.577	0.422714	192	0.00220163	0.00437243
		0.5375	514	15	499	30	529	0.0567108	0.056391		0.9998	192.786	0.214213	192.572	0.428427	193	0.00221983	0.00437243
		0.5373	515	15	500	30	530	0.0566038	0.056391		0.9998	193.783	0.217103	193.566	0.434207	194	0.00223818	0.00437243
		0.5298	516	15	501	30	531	0.0564972	0.056391		0.9998	194.78	0.220027	194.56	0.440054	195	0.00225669	0.00437243
		0.5251	517	15	502	30	532	0.056391	0.056391		0.9998	195.777	0.222985	195.554	0.44597	196	0.00227536	0.00437243
		0.5111	517	16	501	32	533	0.0600375	0.0597015		0.9998	196.774	0.225978	196.548	0.451956	197	0.00229419	0.00437243
		0.5015	518	16	502	32	534	0.0599251	0.0597015		0.9998	197.771	0.229006	197.542	0.458012	198	0.00231319	0.00437243
		0.5008	519	16	503	32	535	0.0598131	0.0597015		0.9998	198.768	0.232069	198.536	0.464138	199	0.00233235	0.00437243
		0.4965	520	16	504	32	536	0.0597015	0.0597015		0.9998	199.765	0.235168	199.53	0.470337	200	0.00235168	0.00437243
		0.4954	520	17	503	34	537	0.0633147	0.0630798		0.9998	200.762	0.238304	200.523	0.476608	201	0.00237119	0.00437243
		0.4931	521	17	504	34	538	0.063197	0.0630798		0.9998	201.759	0.241477	201.517	0.482953	202	0.00239086	0.00437243
		0.4929	522	17	505	34	539	0.0630798	0.0630798		0.9998	202.755	0.244687	202.511	0.489373	203	0.0024107	0.00437243
		0.4898	522	18	504	36	540	0.0666667	0.0645161		0.9997	203.752	0.247934	203.504	0.495868	204	0.00243073	0.00649514
		0.475	523	18	505	36	541	0.0665434	0.0645161		0.9996	204.749	0.25122	204.498	0.50244	205	0.00245093	0.00826982
		0.4719	524	18	506	36	542	0.0664207	0.0645161		0.9996	205.745	0.254544	205.491	0.509089	206	0.00247131	0.00826982
		0.4705	525	18	507	36	543	0.0662983	0.0645161		0.9996	206.742	0.257908	206.484	0.515816	207	0.00249187	0.00826982
		0.4656	526	18	508	36	544	0.0661765	0.0645161		0.9996	207.739	0.261311	207.477	0.522623	208	0.00251261	0.00826982
		0.4638	527	18	509	36	545	0.066055	0.0645161		0.9996	208.735	0.264755	208.47	0.52951	209	0.00253354	0.00826982
		0.4589	528	18	510	36	546	0.0659341	0.0645161		0.9996	209.732	0.268239	209.464	0.536478	210	0.00255466	0.00826982
		0.4579	529	18	511	36	547	0.0658135	0.0645161		0.9996	210.728	0.271765	210.456	0.543529	211	0.00257597	0.00826982
		0.4537	530	18	512	36	548	0.0656934	0.0645161		0.9996	211.725	0.275332	211.449	0.550663	212	0.00259747	0.00826982
		0.4523	531	18	513	36	549	0.0655738	0.0645161		0.9996	212.721	0.278941	212.442	0.557882	213	0.00261916	0.00826982
		0.45	532	18	514	36	550	0.0654545	0.0645161		0.9996	213.717	0.282593	213.435	0.565186	214	0.00264105	0.00826982
		0.449	533	18	515	36	551	0.0653358	0.0645161		0.9996	214.714	0.286288	214.427	0.572576	215	0.00266315	0.00826982
		0.4457	534	18	516	36	552	0.0652174	0.0645161		0.9996	215.71	0.290027	215.42	0.580054	216	0.00268544	0.00826982
		0.439	537	18	519	36	555	0.0648649	0.0645161		0.9996	216.706	0.293811	216.412	0.587621	217	0.00270793	0.00826982
		0.4329	538	18	520	36	556	0.0647482	0.0645161		0.9996	217.702	0.297639	217.405	0.595278	218	0.00273063	0.00826982
		0.4294	539	18	521	36	557	0.064632	0.0645161		0.9996	218.698	0.301513	218.397	0.603026	219	0.00275354	0.00826982
		0.4284	540	18	522	36	558	0.0645161	0.0645161		0.9996	219.695	0.305433	219.389	0.610867	220	0.00277667	0.00826982
		0.4196	540	19	521	38	559	0.0679785	0.0678571		0.9996	220.691	0.3094	220.381	0.6188	221	0.0028	0.00826982
		0.4165	541	19	522	38	560	0.0678571	0.0678571		0.9996	221.687	0.313414	221.373	0.626828	222	0.00282355	0.00826982
		0.4153	541	20	521	40	561	0.0713012	0.070922		0.9996	222.683	0.317476	222.365	0.634952	223	0.00284732	0.00826982
		0.414	542	20	522	40	562	0.0711744	0.070922		0.9996	223.678	0.321586	223.357	0.643173	224	0.00287131	0.00826982
		0.4137	543	20	523	40	563	0.071048	0.070922		0.9996	224.674	0.325746	224.349	0.651492	225	0.00289552	0.00826982
		0.408	544	20	524	40	564	0.070922	0.070922		0.9996	225.67	0.329955	225.34	0.659911	226	0.00291996	0.00826982
		0.4076	544	21	523	42	565	0.0743363	0.0742049		0.9996	226.666	0.334215	226.332	0.66843	227	0.00294463	0.00826982
		0.4059	545	21	524	42	566	0.0742049	0.0742049		0.9996	227.661	0.338526	227.323	0.677052	228	0.00296953	0.00826982
		0.4048	545	22	523	44	567	0.0776014	0.0776014		0.9996	228.657	0.342888	228.314	0.685777	229	0.00299466	0.00826982
		0.3975	545	23	522	46	568	0.0809859	0.0807018		0.9996	229.653	0.347303	229.305	0.694606	230	0.00302003	0.00826982
		0.396	546	23	523	46	569	0.0808436	0.0807018		0.9996	230.648	0.351771	230.296	0.703542	231	0.00304564	0.00826982
		0.3902	547	23	524	46	570	0.0807018	0.0807018		0.9996	231.644	0.356293	231.287	0.712586	232	0.00307149	0.00826982
		0.3882	547	24	523	48	571	0.084063	0.0836237		0.9996	232.639	0.360869	232.278	0.721738	233	0.00309759	0.00826982
		0.3843	548	24	524	48	572	0.0839161	0.0836237		0.9996	233.634	0.3655	233.269	0.731	234	0.00312393	0.00826982
		0.3816	549	24	525	48	573	0.0837696	0.0836237		0.9996	234.63	0.370187	234.26	0.740374	235	0.00315053	0.00826982
		0.3803	550	24	526	48	574	0.0836237	0.0836237		0.9996	235.625	0.374931	235.25	0.749861	236	0.00317738	0.00826982
		0.3729	550	25	525	50	575	0.0869565	0.0862069		0.9996	236.62	0.379732	236.241	0.759463	237	0.00320449	0.00826982
		0.3702	551	25	526	50	576	0.0868056	0.0862069		0.9996	237.615	0.384591	237.231	0.769181	238	0.00323185	0.00826982
		0.3692	555	25	530	50	580	0.0862069	0.0862069		0.9996	238.61	0.389508	238.221	0.779017	239	0.00325949	0.00826982
		0.3669	555	26	529	52	581	0.0895009	0.0891938		0.9996	239.606	0.394486	239.211	0.788972	240	0.00328738	0.00826982
		0.359	556	26	530	52	582	0.0893471	0.0891938		0.9996	240.6	0.399524	240.201	0.799047	241	0.00331555	0.00826982
		0.3572	557	26	531	52	583	0.0891938	0.0891938		0.9996	241.595	0.404623	241.191	0.809245	242	0.00334399	0.00826982
		0.3458	557	27	530	54	584	0.0924658	0.0907563		0.9996	242.59	0.409783	242.18	0.819567	243	0.0033727	0.00826982
		0.3442	558	27	531	54	585	0.0923077	0.0907563		0.9996	243.585	0.415007	243.17	0.830014	244	0.0034017	0.00826982
		0.3401	559	27	532	54	586	0.0921502	0.0907563		0.9995	244.58	0.420294	244.159	0.840589	245	0.00343097	0.0105744
		0.3398	560	27	533	54	587	0.0919932	0.0907563		0.9993	245.574	0.425646	245.149	0.851292	246	0.00346054	0.0114428
		0.3384	561	27	534	54	588	0.0918367	0.0907563		0.9993	246.569	0.431063	246.138	0.862126	247	0.00349039	0.0114428
		0.337	562	27	535	54	589	0.0916808	0.0907563		0.9993	247.563	0.436546	247.127	0.873092	248	0.00352053	0.0114428
		0.3257	563	27	536	54	590	0.0915254	0.0907563		0.9993	248.558	0.442096	248.116	0.884192	249	0.00355097	0.0114428
		0.3254	564	27	537	54	591	0.0913706	0.0907563		0.9993	249.552	0.447714	249.105	0.895428	250	0.00358171	0.0114428
		0.3252	565	27	538	54	592	0.0912162	0.0907563		0.9993	250.547	0.453401	250.093	0.906801	251	0.00361275	0.0114428
		0.3247	566	27	539	54	593	0.0910624	0.0907563		0.9993	251.541	0.459157	251.082	0.918314	252	0.0036441	0.0114428
		0.3174	567	27	540	54	594	0.0909091	0.0907563		0.9993	252.535	0.464984	252.07	0.929968	253	0.00367576	0.0114428
		0.3125	568	27	541	54	595	0.0907563	0.0907563		0.9993	253.529	0.470883	253.058	0.941765	254	0.00370774	0.0114428
		0.3112	568	28	540	56	596	0.0939597	0.0930233		0.9993	254.523	0.476854	254.046	0.953707	255	0.00374003	0.0114428
		0.3084	569	28	541	56	597	0.0938023	0.0930233		0.9993	255.517	0.482898	255.034	0.965796	256	0.00377264	0.0114428
		0.307	570	28	542	56	598	0.0936455	0.0930233		0.9993	256.511	0.489017	256.022	0.978034	257	0.00380558	0.0114428
		0.3064	571	28	543	56	599	0.0934891	0.0930233		0.999	257.505	0.495211	257.01	0.990422	258	0.00383885	0.0123884
		0.3049	573	28	545	56	601	0.093178	0.0930233		0.9989	258.499	0.501482	257.997	1.00296	259	0.00387245	0.0125412
		0.3005	574	28	546	56	602	0.0930233	0.0930233		0.9987	259.492	0.50783	258.984	1.01566	260	0.00390638	0.012696
		0.2981	574	29	545	58	603	0.0961857	0.0961857		0.9986	260.486	0.514256	259.971	1.02851	261	0.00394066	0.0129321
		0.295	574	30	544	60	604	0.0993377	0.0993377		0.9986	261.479	0.520762	260.958	1.04152	262	0.00397528	0.0129321
		0.2904	574	31	543	62	605	0.102479	0.102142		0.9979	262.473	0.527349	261.945	1.0547	263	0.00401026	0.0132542
		0.289	575	31	544	62	606	0.10231	0.102142		0.9979	263.466	0.534017	262.932	1.06803	264	0.00404558	0.0132542
		0.2855	576	31	545	62	607	0.102142	0.102142		0.9976	264.459	0.540767	263.918	1.08153	265	0.00408126	0.0135014
		0.28	576	32	544	64	608	0.105263	0.105263		0.9974	265.452	0.547602	264.905	1.0952	266	0.00411731	0.013669
		0.2793	576	33	543	66	609	0.108374	0.108197		0.9971	266.445	0.554521	265.891	1.10904	267	0.00415372	0.0141851
		0.279	577	33	544	66	610	0.108197	0.108197		0.9971	267.438	0.561527	266.877	1.12305	268	0.0041905	0.0141851
		0.2782	577	34	543	68	611	0.111293	0.109855		0.9971	268.431	0.568619	267.863	1.13724	269	0.00422765	0.0141851
		0.2779	578	34	544	68	612	0.111111	0.109855		0.9971	269.424	0.5758	268.848	1.1516	270	0.00426519	0.0141851
		0.2774	579	34	545	68	613	0.11093	0.109855		0.9971	270.417	0.583071	269.834	1.16614	271	0.00430311	0.0141851
		0.2751	580	34	546	68	614	0.110749	0.109855		0.997	271.41	0.590432	270.819	1.18086	272	0.00434141	0.0173129
		0.274	581	34	547	68	615	0.110569	0.109855		0.997	272.402	0.597885	271.804	1.19577	273	0.00438011	0.0173129
		0.2663	582	34	548	68	616	0.11039	0.109855		0.997	273.395	0.605431	272.789	1.21086	274	0.00441921	0.0173129
		0.2654	583	34	549	68	617	0.110211	0.109855		0.997	274.387	0.613072	273.774	1.22614	275	0.0044587	0.0173129
		0.2601	584	34	550	68	618	0.110032	0.109855		0.997	275.379	0.620808	274.758	1.24162	276	0.00449861	0.0173129
		0.2582	585	34	551	68	619	0.109855	0.109855		0.997	276.371	0.628641	275.743	1.25728	277	0.00453893	0.0173129
		0.2559	585	35	550	70	620	0.112903	0.11254		0.997	277.363	0.636572	276.727	1.27314	278	0.00457966	0.0173129
		0.2547	586	35	551	70	621	0.112721	0.11254		0.997	278.355	0.644603	277.711	1.28921	279	0.00462081	0.0173129
		0.2522	587	35	552	70	622	0.11254	0.11254		0.997	279.347	0.652735	278.695	1.30547	280	0.00466239	0.0173129
		0.2507	587	36	551	72	623	0.11557	0.11557		0.997	280.339	0.660969	279.678	1.32194	281	0.0047044	0.0173129
		0.2499	587	37	550	74	624	0.11859	0.11859		0.997	281.331	0.669306	280.661	1.33861	282	0.00474685	0.0173129
		0.249	587	38	549	76	625	0.1216	0.121406		0.997	282.322	0.677749	281.645	1.3555	283	0.00478974	0.0173129
		0.2483	588	38	550	76	626	0.121406	0.121406		0.997	283.314	0.686297	282.627	1.37259	284	0.00483308	0.0173129
		0.2467	588	39	549	78	627	0.124402	0.124006		0.997	284.305	0.694954	283.61	1.38991	285	0.00487687	0.0173129
		0.2466	590	39	551	78	629	0.124006	0.124006		0.997	285.296	0.70372	284.593	1.40744	286	0.00492112	0.0173129
		0.2441	590	40	550	80	630	0.126984	0.126783		0.997	286.287	0.712596	285.575	1.42519	287	0.00496583	0.0173129
		0.2435	591	40	551	80	631	0.126783	0.126783		0.997	287.278	0.721585	286.557	1.44317	288	0.005011	0.0173129
		0.2419	591	41	550	82	632	0.129747	0.129338		0.997	288.269	0.730687	287.539	1.46137	289	0.00505666	0.0173129
		0.2403	592	41	551	82	633	0.129542	0.129338		0.997	289.26	0.739904	288.52	1.47981	290	0.00510279	0.0173129
		0.2402	593	41	552	82	634	0.129338	0.129338		0.997	290.251	0.749238	289.502	1.49848	291	0.0051494	0.0173129
		0.2396	593	42	551	84	635	0.132283	0.132283		0.997	291.241	0.758691	290.483	1.51738	292	0.00519651	0.0173129
		0.2386	593	43	550	86	636	0.13522	0.134585		0.997	292.232	0.768263	291.463	1.53653	293	0.00524411	0.0173129
		0.2375	594	43	551	86	637	0.135008	0.134585		0.997	293.222	0.777956	292.444	1.55591	294	0.00529222	0.0173129
		0.237	595	43	552	86	638	0.134796	0.134585		0.997	294.212	0.787773	293.424	1.57555	295	0.00534083	0.0173129
		0.2366	596	43	553	86	639	0.134585	0.134585		0.997	295.202	0.797715	294.405	1.59543	296	0.00538996	0.0173129
		0.2354	596	44	552	88	640	0.1375	0.137285		0.997	296.192	0.807782	295.384	1.61556	297	0.00543961	0.0173129
		0.2343	597	44	553	88	641	0.137285	0.137285		0.997	297.182	0.817978	296.364	1.63596	298	0.00548979	0.0173129
		0.2339	597	45	552	90	642	0.140187	0.139535		0.9964	298.172	0.828304	297.343	1.65661	299	0.0055405	0.0217251
		0.2338	598	45	553	90	643	0.139969	0.139535		0.9964	299.161	0.838762	298.322	1.67752	300	0.00559174	0.0217251
		0.2335	599	45	554	90	644	0.139752	0.139535		0.9964	300.151	0.849352	299.301	1.6987	301	0.00564354	0.0217251
		0.2333	600	45	555	90	645	0.139535	0.139535		0.9964	301.14	0.860078	300.28	1.72016	302	0.00569588	0.0217251
		0.2321	600	46	554	92	646	0.142415	0.142415		0.9964	302.129	0.870941	301.258	1.74188	303	0.00574878	0.0217251
		0.2307	600	47	553	94	647	0.145286	0.144838		0.9964	303.118	0.881942	302.236	1.76388	304	0.00580225	0.0217251
		0.2305	601	47	554	94	648	0.145062	0.144838		0.9964	304.107	0.893084	303.214	1.78617	305	0.00585629	0.0217251
		0.2294	602	47	555	94	649	0.144838	0.144838		0.9964	305.096	0.904368	304.191	1.80874	306	0.0059109	0.0217251
		0.2289	602	48	554	96	650	0.147692	0.146119		0.9964	306.084	0.915797	305.168	1.83159	307	0.0059661	0.0217251
		0.2286	603	48	555	96	651	0.147465	0.146119		0.9953	307.073	0.927372	306.145	1.85474	308	0.0060219	0.0234464
		0.2256	604	48	556	96	652	0.147239	0.146119		0.9953	308.061	0.939095	307.122	1.87819	309	0.00607829	0.0234464
		0.2253	605	48	557	96	653	0.147014	0.146119		0.9953	309.049	0.950969	308.098	1.90194	310	0.00613528	0.0234464
		0.2247	607	48	559	96	655	0.146565	0.146119		0.9946	310.037	0.962994	309.074	1.92599	311	0.00619289	0.024205
		0.224	608	48	560	96	656	0.146341	0.146119		0.9946	311.025	0.975174	310.05	1.95035	312	0.00625112	0.024205
		0.2223	609	48	561	96	657	0.146119	0.146119		0.9943	312.012	0.987511	311.025	1.97502	313	0.00630997	0.0261318
		0.2215	609	49	560	98	658	0.148936	0.14871		0.9943	313	1.00001	312	2.00001	314	0.00636946	0.0261318
		0.2203	610	49	561	98	659	0.14871	0.14871		0.9943	313.987	1.01266	312.975	2.02532	315	0.00642959	0.0261318
		0.2199	610	50	560	100	660	0.151515	0.151515		0.9943	314.975	1.02548	313.949	2.05096	316	0.00649037	0.0261318
		0.2191	610	51	559	102	661	0.154312	0.154312		0.9943	315.962	1.03846	314.923	2.07692	317	0.00655181	0.0261318
		0.2174	611	52	559	104	663	0.156863	0.154993		0.9943	316.948	1.05161	315.897	2.10322	318	0.00661391	0.0261318
		0.2171	612	52	560	104	664	0.156627	0.154993		0.9943	317.935	1.06493	316.87	2.12986	319	0.00667668	0.0261318
		0.2167	613	52	561	104	665	0.156391	0.154993		0.9943	318.922	1.07842	317.843	2.15684	320	0.00674013	0.0261318
		0.2158	614	52	562	104	666	0.156156	0.154993		0.9943	319.908	1.09208	318.816	2.18417	321	0.00680427	0.0261318
		0.2141	615	52	563	104	667	0.155922	0.154993		0.9943	320.894	1.10593	319.788	2.21185	322	0.0068691	0.0261318
		0.2138	616	52	564	104	668	0.155689	0.154993		0.9941	321.88	1.11994	320.76	2.23989	323	0.00693464	0.0282177
		0.2137	618	52	566	104	670	0.155224	0.154993		0.9941	322.866	1.13414	321.732	2.26829	324	0.00700089	0.0282177
		0.2125	619	52	567	104	671	0.154993	0.154993		0.9939	323.851	1.14853	322.703	2.29705	325	0.00706786	0.0287656
		0.2108	619	53	566	106	672	0.157738	0.157738		0.9936	324.837	1.1631	323.674	2.32619	326	0.00713555	0.0291369
		0.2091	619	54	565	108	673	0.160475	0.159527		0.9928	325.822	1.17785	324.644	2.3557	327	0.00720399	0.0295131
		0.2075	620	54	566	108	674	0.160237	0.159527		0.9924	326.807	1.1928	325.614	2.3856	328	0.00727317	0.0298943
		0.2058	621	54	567	108	675	0.16	0.159527		0.9911	327.792	1.20794	326.584	2.41588	329	0.0073431	0.0302806
		0.2055	622	54	568	108	676	0.159763	0.159527		0.991	328.777	1.22328	327.553	2.44655	330	0.00741379	0.0310686
		0.2041	623	54	569	108	677	0.159527	0.159527		0.991	329.761	1.23881	328.522	2.47762	331	0.00748526	0.0310686
		0.2031	623	55	568	110	678	0.162242	0.162003		0.991	330.745	1.25455	329.491	2.50909	332	0.0075575	0.0310686
		0.2025	624	55	569	110	679	0.162003	0.162003		0.9902	331.73	1.27048	330.459	2.54097	333	0.00763054	0.0318776
		0.2024	624	56	568	112	680	0.164706	0.163504		0.9896	332.713	1.28663	331.427	2.57326	334	0.00770437	0.0322901
		0.2008	625	56	569	112	681	0.164464	0.163504		0.9892	333.697	1.30298	332.394	2.60597	335	0.00777901	0.0327081
		0.1991	627	56	571	112	683	0.163982	0.163504		0.989	334.68	1.31955	333.361	2.6391	336	0.00785446	0.0331316
		0.1978	628	56	572	112	684	0.163743	0.163504		0.9886	335.664	1.33633	334.327	2.67266	337	0.00793074	0.0335607
		0.1975	629	56	573	112	685	0.163504	0.163504		0.9881	336.647	1.35333	335.293	2.70666	338	0.00800786	0.0339954
		0.1974	629	57	572	114	686	0.166181	0.166181		0.9879	337.629	1.37055	336.259	2.74109	339	0.00808582	0.0344359
		0.1959	629	58	571	116	687	0.16885	0.16836		0.9875	338.612	1.38799	337.224	2.77597	340	0.00816463	0.0348822
		0.1957	630	58	572	116	688	0.168605	0.16836		0.9868	339.594	1.40565	338.189	2.81131	341	0.00824431	0.0355626
		0.1949	631	58	573	116	689	0.16836	0.16836		0.9868	340.576	1.42355	339.153	2.8471	342	0.00832486	0.0355626
		0.1948	631	59	572	118	690	0.171014	0.17052		0.9866	341.558	1.44168	340.117	2.88336	343	0.00840629	0.0362565
		0.194	632	59	573	118	691	0.170767	0.17052		0.9857	342.54	1.46004	341.08	2.92009	344	0.00848862	0.0367267
		0.1926	633	59	574	118	692	0.17052	0.17052		0.9851	343.521	1.47864	342.043	2.95729	345	0.00857185	0.0372031
		0.1923	633	60	573	120	693	0.17316	0.17316		0.9841	344.503	1.49749	343.005	2.99497	346	0.008656	0.0376857
		0.1921	633	61	572	122	694	0.175793	0.175287		0.9834	345.483	1.51657	343.967	3.03315	347	0.00874107	0.0384215
		0.1912	635	61	574	122	696	0.175287	0.175287		0.9834	346.464	1.53591	344.928	3.07182	348	0.00882707	0.0384215
		0.1905	635	62	573	124	697	0.177905	0.177905		0.9826	347.445	1.5555	345.889	3.11099	349	0.00891402	0.0394251
		0.1898	635	63	572	126	698	0.180516	0.179487		0.9826	348.425	1.57534	346.849	3.15067	350	0.00900192	0.0394251
		0.189	636	63	573	126	699	0.180258	0.179487		0.9825	349.405	1.59543	347.809	3.19087	351	0.00909079	0.040195
		0.1888	637	63	574	126	700	0.18	0.179487		0.982	350.384	1.61579	348.768	3.23158	352	0.00918064	0.0407167
		0.1883	639	63	576	126	702	0.179487	0.179487		0.981	351.364	1.63642	349.727	3.27283	353	0.00927147	0.0412452
		0.187	639	64	575	128	703	0.182077	0.181818		0.9774	352.343	1.65731	350.685	3.31461	354	0.00936331	0.0423228
		0.1869	640	64	576	128	704	0.181818	0.181818		0.9774	353.322	1.67847	351.643	3.35693	355	0.00945615	0.0423228
		0.1867	640	65	575	130	705	0.184397	0.184397		0.9774	354.3	1.6999	352.6	3.39981	356	0.00955002	0.0423228
		0.1852	640	66	574	132	706	0.186969	0.186704		0.9772	355.278	1.72162	353.557	3.44324	357	0.00964492	0.0434286
		0.1841	641	66	575	132	707	0.186704	0.186704		0.9755	356.256	1.74361	354.513	3.48723	358	0.00974086	0.0439923
		0.1834	641	67	574	134	708	0.189266	0.188999		0.9748	357.234	1.7659	355.468	3.53179	359	0.00983786	0.0445632
		0.1831	642	67	575	134	709	0.188999	0.188999		0.9744	358.212	1.78847	356.423	3.57693	360	0.00993593	0.0451415
		0.1816	642	68	574	136	710	0.191549	0.191549		0.9732	359.189	1.81133	357.377	3.62266	361	0.0100351	0.0457273
		0.1811	642	69	573	138	711	0.194093	0.191933		0.9711	360.166	1.83449	358.331	3.66898	362	0.0101353	0.0463206
		0.1797	643	69	574	138	712	0.19382	0.191933		0.97	361.142	1.85795	359.284	3.7159	363	0.0102366	0.0469215
		0.179	645	69	576	138	714	0.193277	0.191933		0.9696	362.118	1.88172	360.237	3.76343	364	0.0103391	0.0478375
		0.1789	646	69	577	138	715	0.193007	0.191933		0.9696	363.094	1.90579	361.188	3.81158	365	0.0104427	0.0478375
		0.1779	648	69	579	138	717	0.192469	0.191933		0.967	364.07	1.93018	362.14	3.86035	366	0.0105474	0.0487711
		0.1768	649	69	580	138	718	0.192201	0.191933		0.9658	365.045	1.95488	363.09	3.90976	367	0.0106533	0.0494034
		0.1758	650	69	581	138	719	0.191933	0.191933		0.9645	366.02	1.9799	364.04	3.9598	368	0.0107603	0.0526884
		0.1751	650	70	580	140	720	0.194444	0.193906		0.9645	366.995	2.00525	364.99	4.01049	369	0.0108685	0.0526884
		0.174	651	70	581	140	721	0.194175	0.193906		0.9645	367.969	2.03092	365.938	4.06184	370	0.010978	0.0526884
		0.1738	652	70	582	140	722	0.193906	0.193906		0.9645	368.943	2.05693	366.886	4.11386	371	0.0110886	0.0526884
		0.1737	652	71	581	142	723	0.196404	0.196133		0.9645	369.917	2.08327	367.833	4.16655	372	0.0112004	0.0526884
		0.1731	653	71	582	142	724	0.196133	0.196133		0.9645	370.89	2.10996	368.78	4.21992	373	0.0113135	0.0526884
		0.1723	653	72	581	144	725	0.198621	0.198621		0.9645	371.863	2.13699	369.726	4.27398	374	0.0114278	0.0526884
		0.1717	653	73	580	146	726	0.201102	0.200825		0.9645	372.836	2.16437	370.671	4.32874	375	0.0115433	0.0526884
		0.1715	654	73	581	146	727	0.200825	0.200825		0.9645	373.808	2.19211	371.616	4.38421	376	0.0116601	0.0526884
		0.1701	654	74	580	148	728	0.203297	0.203018		0.9625	374.78	2.2202	372.56	4.4404	377	0.0117782	0.056187
		0.1696	655	74	581	148	729	0.203018	0.203018		0.9608	375.751	2.24866	373.503	4.49731	378	0.0118977	0.0569134
		0.1694	657	75	582	150	732	0.204918	0.203528		0.9593	376.723	2.27748	374.445	4.55496	379	0.0120184	0.057649
		0.1681	658	75	583	150	733	0.204638	0.203528		0.9592	377.693	2.30668	375.387	4.61336	380	0.0121404	0.0583937
		0.1674	659	75	584	150	734	0.20436	0.203528		0.9583	378.664	2.33625	376.327	4.6725	381	0.0122638	0.0591478
		0.1662	660	75	585	150	735	0.204082	0.203528		0.9578	379.634	2.36621	377.268	4.73242	382	0.0123885	0.0602967
		0.1659	661	75	586	150	736	0.203804	0.203528		0.9578	380.603	2.39655	378.207	4.7931	383	0.0125146	0.0602967
		0.1652	662	75	587	150	737	0.203528	0.203528		0.9558	381.573	2.42728	379.145	4.85457	384	0.0126421	0.061467
		0.1648	662	76	586	152	738	0.205962	0.205128		0.9556	382.542	2.45841	380.083	4.91683	385	0.012771	0.0622594
		0.1639	664	76	588	152	740	0.205405	0.205128		0.9542	383.51	2.48994	381.02	4.97989	386	0.0129013	0.0630616
		0.1637	665	76	589	152	741	0.205128	0.205128		0.9526	384.478	2.52188	381.956	5.04376	387	0.013033	0.0642835
		0.1636	665	77	588	154	742	0.207547	0.207268		0.9526	385.446	2.55423	382.892	5.10846	388	0.0131661	0.0642835
		0.1632	666	77	589	154	743	0.207268	0.207268		0.9524	386.413	2.58699	383.826	5.17399	389	0.0133007	0.0659482
		0.1631	667	79	588	158	746	0.211796	0.211796		0.9524	387.38	2.62018	384.76	5.24036	390	0.0134368	0.0659482
		0.163	697	96	601	192	793	0.242119	0.242119		0.952	388.346	2.65379	385.692	5.30758	391	0.0135744	0.0672236
		0.1629	723	120	603	240	843	0.284698	0.284698		0.9514	389.312	2.68784	386.624	5.37567	392	0.0137134	0.0680869
		0.1611	723	121	602	242	844	0.28673	0.28673		0.9505	390.278	2.72232	387.555	5.44463	393	0.013854	0.0689607
		0.1607	723	122	601	244	845	0.288757	0.288757		0.9491	391.243	2.75724	388.486	5.51448	394	0.0139961	0.0702915
		0.1605	723	123	600	246	846	0.29078	0.290437		0.9491	392.207	2.79261	389.415	5.58522	395	0.0141398	0.0702915
		0.1601	724	123	601	246	847	0.290437	0.290437		0.9486	393.172	2.82843	390.343	5.65687	396	0.014285	0.0716467
		0.158	725	124	601	248	849	0.292108	0.291422		0.9478	394.135	2.86472	391.271	5.72943	397	0.0144318	0.0725638
		0.1574	726	124	602	248	850	0.291765	0.291422		0.945	395.099	2.90146	392.197	5.80292	398	0.0145802	0.073492
		0.1568	727	124	603	248	851	0.291422	0.291422		0.9445	396.061	2.93868	393.123	5.87735	399	0.0147302	0.0744313
		0.1555	727	125	602	250	852	0.293427	0.292398		0.9435	397.024	2.97637	394.047	5.95274	400	0.0148818	0.075382
		0.1546	728	125	603	250	853	0.293083	0.292398		0.9425	397.985	3.01454	394.971	6.02908	401	0.0150351	0.076344
		0.1538	729	125	604	250	854	0.29274	0.292398		0.9402	398.947	3.0532	395.894	6.1064	402	0.01519	0.0778087
		0.1537	730	125	605	250	855	0.292398	0.292398		0.9402	399.908	3.09235	396.815	6.1847	403	0.0153467	0.0778087
		0.1532	730	126	604	252	856	0.294393	0.293706		0.9386	400.868	3.132	397.736	6.264	404	0.015505	0.0792996
		0.1531	731	126	605	252	857	0.294049	0.293706		0.9378	401.828	3.17216	398.656	6.34431	405	0.015665	0.0803083
		0.1524	732	126	606	252	858	0.293706	0.293706		0.9377	402.787	3.21282	399.574	6.42564	406	0.0158267	0.0813289
		0.1516	732	127	605	254	859	0.295693	0.295006		0.9362	403.746	3.254	400.492	6.508	407	0.0159902	0.0823616
		0.1505	733	127	606	254	860	0.295349	0.295006		0.9354	404.704	3.29571	401.409	6.59141	408	0.0161554	0.0834064
		0.1501	734	127	607	254	861	0.295006	0.295006		0.9353	405.662	3.33794	402.324	6.67587	409	0.0163224	0.0844635
		0.1476	734	128	606	256	862	0.296984	0.296296		0.934	406.619	3.3807	403.239	6.76141	410	0.0164912	0.0855329
		0.1472	735	128	607	256	863	0.29664	0.296296		0.9334	407.576	3.42401	404.152	6.84802	411	0.0166619	0.0866148
		0.1467	736	128	608	256	864	0.296296	0.296296		0.9312	408.532	3.46787	405.064	6.93573	412	0.0168343	0.0877093
		0.1447	736	129	607	258	865	0.298266	0.298266		0.9304	409.488	3.51227	405.975	7.02455	413	0.0170086	0.0888164
		0.1443	736	130	606	260	866	0.300231	0.299771		0.9288	410.443	3.55724	406.886	7.11449	414	0.0171848	0.0905011
		0.1437	736	131	605	262	867	0.302191	0.299771		0.9288	411.397	3.60278	407.794	7.20556	415	0.0173628	0.0905011
		0.1428	737	131	606	262	868	0.301843	0.299771		0.9277	412.351	3.64889	408.702	7.29777	416	0.0175427	0.092215
		0.1416	738	131	607	262	869	0.301496	0.299771		0.9274	413.304	3.69557	409.609	7.39115	417	0.0177246	0.0933739
		0.1405	739	131	608	262	870	0.301149	0.299771		0.9249	414.257	3.74285	410.514	7.48569	418	0.0179084	0.094546
		0.1402	740	131	609	262	871	0.300804	0.299771		0.9201	415.209	3.79071	411.419	7.58143	419	0.0180941	0.0957315
		0.1389	741	131	610	262	872	0.300459	0.299771		0.9188	416.161	3.83918	412.322	7.67836	420	0.0182818	0.0969304
		0.1387	742	131	611	262	873	0.300115	0.299771		0.9177	417.112	3.88825	413.224	7.7765	421	0.0184715	0.0981427
		0.1384	743	131	612	262	874	0.299771	0.299771		0.916	418.062	3.93793	414.124	7.87587	422	0.0186632	0.0993688
		0.138	743	132	611	264	875	0.301714	0.301026		0.9149	419.012	3.98824	415.024	7.97648	423	0.0188569	0.100609
		0.1364	744	132	612	264	876	0.30137	0.301026		0.9093	419.961	4.03917	415.922	8.07834	424	0.0190527	0.101862
		0.1359	745	132	613	264	877	0.301026	0.301026		0.9076	420.909	4.09074	416.819	8.18147	425	0.0192505	0.10313
		0.1341	745	133	612	266	878	0.302961	0.302825		0.9068	421.857	4.14294	417.714	8.28588	426	0.0194504	0.104411
		0.1339	745	134	611	268	879	0.304892	0.302825		0.8998	422.804	4.19579	418.608	8.39159	427	0.0196524	0.105707
		0.1331	746	134	612	268	880	0.304545	0.302825		0.8988	423.751	4.2493	419.501	8.49861	428	0.0198566	0.107017
		0.1325	747	134	613	268	881	0.3042	0.302825		0.8964	424.697	4.30347	420.393	8.60695	429	0.0200628	0.108341
		0.1318	748	134	614	268	882	0.303855	0.302825		0.8956	425.642	4.35831	421.283	8.71663	430	0.0202712	0.10968
		0.1304	749	134	615	268	883	0.303511	0.302825		0.8913	426.586	4.41383	422.172	8.82766	431	0.0204818	0.111033
		0.1298	750	134	616	268	884	0.303167	0.302825		0.8864	427.53	4.47003	423.06	8.94006	432	0.0206946	0.112401
		0.1297	751	134	617	268	885	0.302825	0.302825		0.8825	428.473	4.52692	423.946	9.05385	433	0.0209096	0.113783
		0.1288	751	135	616	270	886	0.30474	0.30474		0.8822	429.415	4.58451	424.831	9.16903	434	0.0211268	0.115181
		0.1278	751	136	615	272	887	0.306652	0.306306		0.8773	430.357	4.64281	425.714	9.28562	435	0.0213463	0.116593
		0.1265	752	136	616	272	888	0.306306	0.306306		0.8765	431.298	4.70182	426.596	9.40364	436	0.021568	0.11802
		0.126	752	137	615	274	889	0.308211	0.30752		0.876	432.238	4.76155	427.477	9.52311	437	0.021792	0.119462
		0.1258	753	137	616	274	890	0.307865	0.30752		0.874	433.178	4.82201	428.356	9.64403	438	0.0220183	0.12092
		0.1255	754	137	617	274	891	0.30752	0.30752		0.8723	434.117	4.88321	429.234	9.76642	439	0.022247	0.122392
		0.1253	754	138	616	276	892	0.309417	0.30838		0.8715	435.055	4.94515	430.11	9.8903	440	0.022478	0.123881
		0.1244	755	138	617	276	893	0.309071	0.30838		0.8671	435.992	5.00784	430.984	10.0157	441	0.0227113	0.126142
		0.1241	756	138	618	276	894	0.308725	0.30838		0.8671	436.929	5.07129	431.857	10.1426	442	0.022947	0.126142
		0.1239	757	138	619	276	895	0.30838	0.30838		0.8647	437.864	5.13551	432.729	10.271	443	0.0231852	0.128438
		0.1237	757	139	618	278	896	0.310268	0.310268		0.8643	438.799	5.20051	433.599	10.401	444	0.0234257	0.129988
		0.1222	757	140	617	280	897	0.312152	0.311804		0.863	439.734	5.26628	434.467	10.5326	445	0.0236687	0.131554
		0.1205	758	140	618	280	898	0.311804	0.311804		0.8617	440.667	5.33285	435.334	10.6657	446	0.0239141	0.133136
		0.1201	758	141	617	282	899	0.313682	0.313682		0.856	441.6	5.40022	436.2	10.8004	447	0.0241621	0.135538
		0.1196	758	142	616	284	900	0.315556	0.314856		0.856	442.532	5.46839	437.063	10.9368	448	0.0244125	0.135538
		0.1195	759	142	617	284	901	0.315205	0.314856		0.8547	443.463	5.53738	437.925	11.0748	449	0.0246654	0.137977
		0.1193	760	142	618	284	902	0.314856	0.314856		0.8502	444.393	5.60719	438.786	11.2144	450	0.0249209	0.139622
		0.1191	760	143	617	286	903	0.316722	0.316722		0.849	445.322	5.67784	439.644	11.3557	451	0.0251789	0.141284
		0.1189	760	144	616	288	904	0.318584	0.318584		0.8477	446.251	5.74932	440.501	11.4986	452	0.0254395	0.14551
		0.1186	760	145	615	290	905	0.320442	0.320088		0.8477	447.178	5.82165	441.357	11.6433	453	0.0257026	0.14551
		0.1182	761	145	616	290	906	0.320088	0.320088		0.8477	448.105	5.89483	442.21	11.7897	454	0.0259684	0.14551
		0.1176	761	146	615	292	907	0.32194	0.320879		0.8477	449.031	5.96888	443.062	11.9378	455	0.0262368	0.14551
		0.1174	762	146	616	292	908	0.321586	0.320879		0.8441	449.956	6.0438	443.912	12.0876	456	0.0265079	0.149839
		0.1173	763	146	617	292	909	0.321232	0.320879		0.8431	450.88	6.1196	444.761	12.2392	457	0.0267816	0.151599
		0.117	764	146	618	292	910	0.320879	0.320879		0.8379	451.804	6.19629	445.607	12.3926	458	0.027058	0.153376
		0.1166	764	147	617	294	911	0.322722	0.322722		0.8342	452.726	6.27387	446.452	12.5477	459	0.0273371	0.155169
		0.1164	765	148	617	296	913	0.324206	0.324206		0.8329	453.648	6.35236	447.295	12.7047	460	0.027619	0.156979
		0.116	765	149	616	298	914	0.326039	0.325733		0.8271	454.568	6.43177	448.136	12.8635	461	0.0279035	0.158806
		0.1159	765	150	615	300	915	0.327869	0.325733		0.8248	455.488	6.51209	448.976	13.0242	462	0.0281909	0.160649
		0.1157	766	150	616	300	916	0.327511	0.325733		0.8218	456.407	6.59334	449.813	13.1867	463	0.028481	0.162509
		0.1156	767	150	617	300	917	0.327154	0.325733		0.8179	457.324	6.67554	450.649	13.3511	464	0.0287739	0.164386
		0.1151	768	150	618	300	918	0.326797	0.325733		0.8136	458.241	6.75868	451.483	13.5174	465	0.0290696	0.16628
		0.115	769	150	619	300	919	0.326442	0.325733		0.8117	459.157	6.84277	452.314	13.6855	466	0.0293681	0.168191
		0.1145	771	150	621	300	921	0.325733	0.325733		0.807	460.072	6.92783	453.144	13.8557	467	0.0296695	0.170118
		0.1139	772	151	621	302	923	0.327194	0.327194		0.7995	460.986	7.01387	453.972	14.0277	468	0.0299738	0.172062
		0.1133	772	152	620	304	924	0.329004	0.329004		0.7957	461.899	7.10088	454.798	14.2018	469	0.0302809	0.174023
		0.1132	772	153	619	306	925	0.330811	0.330097		0.7955	462.811	7.18888	455.622	14.3778	470	0.030591	0.176002
		0.1126	773	153	620	306	926	0.330454	0.330097		0.7887	463.722	7.27788	456.444	14.5558	471	0.0309039	0.177997
		0.1121	774	153	621	306	927	0.330097	0.330097		0.7838	464.632	7.36788	457.264	14.7358	472	0.0312198	0.180009
		0.112	774	154	620	308	928	0.331897	0.331897		0.7817	465.541	7.4589	458.082	14.9178	473	0.0315387	0.182037
		0.1119	774	155	619	310	929	0.333692	0.333333		0.7815	466.449	7.55094	458.898	15.1019	474	0.0318605	0.184083
		0.1113	775	155	620	310	930	0.333333	0.333333		0.7763	467.356	7.64402	459.712	15.288	475	0.0321853	0.186146
		0.111	776	156	620	312	932	0.334764	0.333333		0.7703	468.262	7.73813	460.524	15.4763	476	0.0325131	0.188226
		0.1107	778	156	622	312	934	0.334047	0.333333		0.7629	469.167	7.83329	461.333	15.6666	477	0.032844	0.190322
		0.1102	779	156	623	312	935	0.33369	0.333333		0.7601	470.07	7.92951	462.141	15.859	478	0.0331779	0.192435
		0.11	780	156	624	312	936	0.333333	0.333333		0.7541	470.973	8.02679	462.946	16.0536	479	0.0335148	0.194566
		0.1099	780	157	623	314	937	0.335112	0.335112		0.7523	471.875	8.12515	463.75	16.2503	480	0.0338548	0.196713
		0.1097	780	158	622	316	938	0.336887	0.33617		0.7451	472.775	8.22459	464.551	16.4492	481	0.0341979	0.198877
		0.1093	781	158	623	316	939	0.336528	0.33617		0.7396	473.675	8.32512	465.35	16.6502	482	0.0345441	0.201057
		0.1087	782	158	624	316	940	0.33617	0.33617		0.7394	474.573	8.42674	466.147	16.8535	483	0.0348933	0.203254
		0.1084	782	159	623	318	941	0.337938	0.337197		0.7344	475.471	8.52948	466.941	17.059	484	0.0352458	0.207699
		0.1082	783	159	624	318	942	0.33758	0.337197		0.7344	476.367	8.63333	467.733	17.2667	485	0.0356014	0.207699
		0.108	784	159	625	318	943	0.337222	0.337197		0.7344	477.262	8.7383	468.523	17.4766	486	0.0359601	0.207699
		0.1073	784	160	624	320	944	0.338983	0.337197		0.7289	478.156	8.84441	469.311	17.6888	487	0.036322	0.21221
		0.1068	785	160	625	320	945	0.338624	0.337197		0.7178	479.048	8.95165	470.097	17.9033	488	0.0366871	0.21449
		0.1066	786	160	626	320	946	0.338266	0.337197		0.7067	479.94	9.06005	470.88	18.1201	489	0.0370554	0.216787
		0.1065	787	160	627	320	947	0.337909	0.337197		0.7066	480.83	9.1696	471.661	18.3392	490	0.0374269	0.2191
		0.1063	788	160	628	320	948	0.337553	0.337197		0.7052	481.72	9.28031	472.439	18.5606	491	0.0378017	0.221429
		0.1059	789	160	629	320	949	0.337197	0.337197		0.7011	482.608	9.3922	473.216	18.7844	492	0.0381797	0.223774
		0.1056	789	161	628	322	950	0.338947	0.338205		0.6966	483.495	9.50527	473.989	19.0105	493	0.0385609	0.227322
		0.1053	790	161	629	322	951	0.338591	0.338205		0.6966	484.38	9.61952	474.761	19.239	494	0.0389454	0.227322
		0.1052	790	162	628	324	952	0.340336	0.338205		0.6862	485.265	9.73498	475.53	19.47	495	0.0393332	0.230906
		0.1049	791	162	629	324	953	0.339979	0.338205		0.6779	486.148	9.85163	476.297	19.7033	496	0.0397243	0.233315
		0.1045	792	162	630	324	954	0.339623	0.338205		0.6722	487.03	9.9695	477.061	19.939	497	0.0401187	0.23574
		0.1043	793	162	631	324	955	0.339267	0.338205		0.67	487.911	10.0886	477.823	20.1772	498	0.0405164	0.238181
		0.1038	796	162	634	324	958	0.338205	0.338205		0.6691	488.791	10.2089	478.582	20.4178	499	0.0409175	0.240637
		0.1031	797	163	634	326	960	0.339583	0.33923		0.6565	489.67	10.3305	479.339	20.6609	500	0.0413219	0.243108
		0.1029	798	163	635	326	961	0.33923	0.33923		0.6511	490.547	10.4533	480.093	20.9065	501	0.0417296	0.245595
		0.1025	798	164	634	328	962	0.340956	0.340909		0.647	491.423	10.5773	480.845	21.1546	502	0.0421407	0.248097
		0.1024	798	165	633	330	963	0.342679	0.340909		0.6429	492.297	10.7026	481.595	21.4052	503	0.0425552	0.250614
		0.1018	799	165	634	330	964	0.342324	0.340909		0.6427	493.171	10.8292	482.342	21.6584	504	0.042973	0.255692
		0.1016	801	165	636	330	966	0.341615	0.340909		0.6427	494.043	10.957	483.086	21.9141	505	0.0433942	0.255692
		0.1014	802	165	637	330	967	0.341262	0.340909		0.6427	494.914	11.0862	483.828	22.1723	506	0.0438188	0.255692
		0.101	803	165	638	330	968	0.340909	0.340909		0.6419	495.783	11.2166	484.567	22.4332	507	0.0442469	0.260828
		0.1009	803	166	637	332	969	0.342621	0.342268		0.6415	496.652	11.3483	485.303	22.6966	508	0.0446783	0.263418
		0.1008	804	166	638	332	970	0.342268	0.342268		0.6337	497.519	11.4813	486.037	22.9626	509	0.0451132	0.266022
		0.1001	804	167	637	334	971	0.343975	0.343207		0.6235	498.384	11.6156	486.769	23.2312	510	0.0455515	0.26864
		0.1	805	167	638	334	972	0.343621	0.343207		0.6131	499.249	11.7513	487.497	23.5025	511	0.0459932	0.271271
		0.09937	806	167	639	334	973	0.343268	0.343207		0.6042	500.112	11.8882	488.224	23.7764	512	0.0464383	0.273916
		0.09934	806	168	638	336	974	0.344969	0.343207		0.5971	500.973	12.0265	488.947	24.053	513	0.046887	0.276575
		0.09923	807	168	639	336	975	0.344615	0.343207		0.5964	501.834	12.1661	489.668	24.3323	514	0.047339	0.279247
		0.09862	808	168	640	336	976	0.344262	0.343207		0.5954	502.693	12.3071	490.386	24.6142	515	0.0477945	0.281932
		0.09861	809	168	641	336	977	0.34391	0.343207		0.5939	503.551	12.4494	491.101	24.8988	516	0.0482535	0.28463
		0.09848	810	168	642	336	978	0.343558	0.343207		0.5879	504.407	12.5931	491.814	25.1862	517	0.048716	0.28734
		0.09817	811	168	643	336	979	0.343207	0.343207		0.5734	505.262	12.7381	492.524	25.4762	518	0.0491819	0.290064
		0.09784	811	169	642	338	980	0.344898	0.344898		0.5732	506.115	12.8845	493.231	25.769	519	0.0496513	0.292799
		0.09778	811	170	641	340	981	0.346585	0.346585		0.5704	506.968	13.0323	493.935	26.0646	520	0.0501242	0.295546
		0.09777	811	173	638	346	984	0.351626	0.351626		0.5703	507.819	13.1814	494.637	26.3629	521	0.0506005	0.298305
		0.09776	811	174	637	348	985	0.353299	0.352584		0.5649	508.668	13.332	495.336	26.664	522	0.0510804	0.301076
		0.09741	812	174	638	348	986	0.352941	0.352584		0.5577	509.516	13.4839	496.032	26.9678	523	0.0515637	0.303858
		0.09708	813	174	639	348	987	0.352584	0.352584		0.5494	510.363	13.6372	496.726	27.2745	524	0.0520505	0.306652
		0.09706	814	175	639	350	989	0.353893	0.353179		0.5445	511.208	13.792	497.416	27.5839	525	0.0525408	0.309456
		0.09678	815	175	640	350	990	0.353535	0.353179		0.5388	512.052	13.9481	498.104	27.8962	526	0.0530346	0.313683
		0.09659	816	175	641	350	991	0.353179	0.353179		0.5388	512.894	14.1056	498.789	28.2113	527	0.0535319	0.313683
		0.09638	816	176	640	352	992	0.354839	0.354839		0.5379	513.735	14.2646	499.471	28.5292	528	0.0540326	0.317933
		0.09627	816	177	639	354	993	0.356495	0.356137		0.5375	514.575	14.425	500.15	28.85	529	0.0545369	0.320778
		0.09622	817	177	640	354	994	0.356137	0.356137		0.5373	515.413	14.5868	500.826	29.1736	530	0.0550446	0.323634
		0.09597	817	178	639	356	995	0.357789	0.357789		0.5298	516.25	14.7501	501.5	29.5001	531	0.0555558	0.326499
		0.09573	817	179	638	358	996	0.359438	0.359438		0.5251	517.085	14.9148	502.17	29.8295	532	0.0560705	0.329373
		0.09572	817	180	637	360	997	0.361083	0.36036		0.5111	517.919	15.0809	502.838	30.1618	533	0.0565887	0.332256
		0.0957	818	180	638	360	998	0.360721	0.36036		0.5015	518.752	15.2485	503.503	30.4969	534	0.0571103	0.335147
		0.09562	819	180	639	360	999	0.36036	0.36036		0.5008	519.583	15.4175	504.165	30.835	535	0.0576354	0.338047
		0.09549	819	181	638	362	1000	0.362	0.362		0.4965	520.412	15.588	504.824	31.1759	536	0.058164	0.340955
		0.09548	819	182	637	364	1001	0.363636	0.363273		0.4954	521.24	15.7599	505.48	31.5198	537	0.0586961	0.343871
		0.09516	820	182	638	364	1002	0.363273	0.363273		0.4931	522.067	15.9333	506.133	31.8666	538	0.0592316	0.346795
		0.09509	820	183	637	366	1003	0.364905	0.364905		0.4929	522.892	16.1082	506.784	32.2163	539	0.0597705	0.349726
		0.09507	820	184	636	368	1004	0.366534	0.366169		0.4898	523.716	16.2845	507.431	32.569	540	0.0603129	0.352664
		0.09471	821	184	637	368	1005	0.366169	0.366169		0.475	524.538	16.4623	508.075	32.9246	541	0.0608587	0.355608
		0.09448	821	185	636	370	1006	0.367793	0.367793		0.4719	525.358	16.6416	508.717	33.2831	542	0.061408	0.358559
		0.0944	821	188	633	376	1009	0.372646	0.372646		0.4705	526.178	16.8223	509.355	33.6447	543	0.0619607	0.361516
		0.09427	822	189	633	378	1011	0.373887	0.373149		0.4656	526.995	17.0046	509.991	34.0091	544	0.0625168	0.364479
		0.0942	823	189	634	378	1012	0.373518	0.373149		0.4638	527.812	17.1883	510.623	34.3766	545	0.0630763	0.367447
		0.094	824	189	635	378	1013	0.373149	0.373149		0.4589	528.626	17.3735	511.253	34.747	546	0.0636392	0.37042
		0.09388	824	190	634	380	1014	0.374753	0.374384		0.4579	529.44	17.5602	511.88	35.1204	547	0.0642055	0.373399
		0.09362	825	190	635	380	1015	0.374384	0.374384		0.4537	530.252	17.7484	512.503	35.4968	548	0.0647752	0.376382
		0.0933	825	191	634	382	1016	0.375984	0.374877		0.4523	531.062	17.9381	513.124	35.8762	549	0.0653482	0.379369
		0.09306	826	191	635	382	1017	0.375615	0.374877		0.45	531.871	18.1293	513.741	36.2585	550	0.0659246	0.38236
		0.09304	827	191	636	382	1018	0.375246	0.374877		0.449	532.678	18.3219	514.356	36.6439	551	0.0665043	0.385355
		0.09284	828	191	637	382	1019	0.374877	0.374877		0.4457	533.484	18.5161	514.968	37.0322	552	0.0670874	0.388354
		0.09274	828	192	636	384	1020	0.376471	0.375734		0.439	534.288	18.7118	515.576	37.4236	553	0.0676737	0.394359
		0.09265	829	192	637	384	1021	0.376102	0.375734		0.439	535.091	18.909	516.182	37.8179	554	0.0682634	0.394359
		0.09257	830	192	638	384	1022	0.375734	0.375734		0.439	535.892	19.1077	516.785	38.2153	555	0.0688564	0.394359
		0.09247	830	193	637	386	1023	0.377322	0.377322		0.4329	536.692	19.3078	517.384	38.6157	556	0.0694527	0.400374
		0.09228	830	194	636	388	1024	0.378906	0.378906		0.4294	537.49	19.5095	517.981	39.0191	557	0.0700522	0.403384
		0.09223	830	195	635	390	1025	0.380488	0.380117		0.4284	538.287	19.7127	518.575	39.4255	558	0.0706549	0.406396
		0.09221	831	195	636	390	1026	0.380117	0.380117		0.4196	539.083	19.9174	519.165	39.8349	559	0.0712609	0.409408
		0.0922	831	196	635	392	1027	0.381694	0.381323		0.4165	539.876	20.1236	519.753	40.2473	560	0.0718702	0.412422
		0.0921	832	196	636	392	1028	0.381323	0.381323		0.4153	540.669	20.3314	520.337	40.6627	561	0.0724826	0.415436
		0.09195	832	197	635	394	1029	0.382896	0.382896		0.414	541.459	20.5406	520.919	41.0812	562	0.0730982	0.41845
		0.09192	832	198	634	396	1030	0.384466	0.383721		0.4137	542.249	20.7513	521.497	41.5026	563	0.0737169	0.421464
		0.09179	833	198	635	396	1031	0.384093	0.383721		0.408	543.036	20.9636	522.073	41.9271	564	0.0743389	0.424478
		0.09167	834	198	636	396	1032	0.383721	0.383721		0.4076	543.823	21.1773	522.645	42.3546	565	0.0749639	0.42749
		0.09164	835	199	636	398	1034	0.384913	0.383799		0.4059	544.607	21.3926	523.215	42.7851	566	0.0755921	0.430502
		0.09162	836	199	637	398	1035	0.384541	0.383799		0.4048	545.391	21.6093	523.781	43.2186	567	0.0762233	0.433512
		0.0914	837	199	638	398	1036	0.38417	0.383799		0.3975	546.172	21.8276	524.345	43.6551	568	0.0768576	0.436521
		0.09137	838	199	639	398	1037	0.383799	0.383799		0.396	546.953	22.0473	524.905	44.0947	569	0.077495	0.439527
		0.09119	838	200	638	400	1038	0.385356	0.384986		0.3902	547.731	22.2686	525.463	44.5372	570	0.0781354	0.442531
		0.09115	839	200	639	400	1039	0.384986	0.384986		0.3882	548.509	22.4914	526.017	44.9827	571	0.0787789	0.445532
		0.09101	839	202	637	404	1041	0.388088	0.388088		0.3843	549.284	22.7156	526.569	45.4313	572	0.0794253	0.44853
		0.09085	839	203	636	406	1042	0.389635	0.388889		0.3816	550.059	22.9414	527.117	45.8828	573	0.0800747	0.451525
		0.09064	840	203	637	406	1043	0.389262	0.388889		0.3803	550.831	23.1686	527.663	46.3373	574	0.080727	0.454516
		0.09048	841	203	638	406	1044	0.388889	0.388889		0.3729	551.603	23.3974	528.205	46.7948	575	0.0813823	0.457503
		0.09012	841	204	637	408	1045	0.390431	0.390057		0.3702	552.372	23.6276	528.745	47.2553	576	0.0820404	0.460486
		0.08994	842	204	638	408	1046	0.390057	0.390057		0.3692	553.141	23.8594	529.281	47.7187	577	0.0827015	0.467922
		0.08978	842	205	637	410	1047	0.391595	0.391221		0.3692	553.907	24.0926	529.815	48.1852	578	0.0833654	0.467922
		0.0897	843	205	638	410	1048	0.391221	0.391221		0.3692	554.673	24.3273	530.345	48.6546	579	0.0840321	0.467922
		0.08967	843	206	637	412	1049	0.392755	0.392008		0.3692	555.437	24.5635	530.873	49.127	580	0.0847017	0.467922
		0.0895	845	206	639	412	1051	0.392008	0.392008		0.3669	556.199	24.8011	531.398	49.6023	581	0.085374	0.475325
		0.08924	845	208	637	416	1053	0.395062	0.394687		0.359	556.96	25.0403	531.919	50.0806	582	0.0860491	0.478276
		0.08906	846	208	638	416	1054	0.394687	0.394687		0.3572	557.719	25.2809	532.438	50.5618	583	0.0867269	0.48122
		0.08889	846	210	636	420	1056	0.397727	0.397351		0.3458	558.477	25.523	532.954	51.0459	584	0.0874074	0.484158
		0.08879	847	210	637	420	1057	0.397351	0.397351		0.3442	559.233	25.7665	533.467	51.533	585	0.0880906	0.487088
		0.08873	847	211	636	422	1058	0.398866	0.398489		0.3401	559.988	26.0115	533.977	52.023	586	0.0887765	0.490012
		0.08854	848	211	637	422	1059	0.398489	0.398489		0.3398	560.742	26.258	534.484	52.516	587	0.089465	0.492928
		0.08837	848	212	636	424	1060	0.4	0.4		0.3384	561.494	26.5059	534.988	53.0118	588	0.0901561	0.495836
		0.08811	848	213	635	426	1061	0.401508	0.401125		0.337	562.245	26.7553	535.489	53.5105	589	0.0908498	0.498736
		0.08802	852	214	638	428	1066	0.401501	0.401125		0.3257	562.994	27.0061	535.988	54.0122	590	0.091546	0.501627
		0.08795	853	214	639	428	1067	0.401125	0.401125		0.3254	563.742	27.2583	536.483	54.5167	591	0.0922448	0.50451
		0.08793	853	215	638	430	1068	0.402622	0.401869		0.3252	564.488	27.512	536.976	55.0241	592	0.092946	0.507385
		0.08776	854	215	639	430	1069	0.402245	0.401869		0.3247	565.233	27.7672	537.466	55.5343	593	0.0936498	0.51025
		0.08769	855	215	640	430	1070	0.401869	0.401869		0.3174	565.976	28.0237	537.953	56.0474	594	0.0943559	0.513105
		0.08752	855	216	639	432	1071	0.403361	0.40261		0.3125	566.718	28.2817	538.437	56.5634	595	0.0950645	0.515951
		0.08749	856	216	640	432	1072	0.402985	0.40261		0.3112	567.459	28.5411	538.918	57.0821	596	0.0957754	0.518787
		0.08732	857	216	641	432	1073	0.40261	0.40261		0.3084	568.198	28.8019	539.396	57.6038	597	0.0964887	0.521613
		0.08716	857	217	640	434	1074	0.404097	0.403721		0.307	568.936	29.0641	539.872	58.1282	598	0.0972043	0.524429
		0.08715	858	217	641	434	1075	0.403721	0.403721		0.3064	569.672	29.3277	540.345	58.6554	599	0.0979222	0.527233
		0.08697	858	219	639	438	1077	0.406685	0.406685		0.3049	570.407	29.5927	540.815	59.1854	600	0.0986424	0.53142
		0.08663	859	221	638	442	1080	0.409259	0.409259		0.3049	571.141	29.8591	541.282	59.7183	601	0.0993648	0.53142
		0.08634	859	222	637	444	1081	0.410731	0.409594		0.3005	571.873	30.1269	541.746	60.2538	602	0.100089	0.535582
		0.08618	860	222	638	444	1082	0.410351	0.409594		0.2981	572.604	30.3961	542.208	60.7922	603	0.100816	0.538342
		0.08615	861	222	639	444	1083	0.409972	0.409594		0.295	573.333	30.6666	542.667	61.3333	604	0.101545	0.54109
		0.08611	862	222	640	444	1084	0.409594	0.409594		0.2904	574.061	30.9385	543.123	61.8771	605	0.102276	0.543826
		0.08596	862	223	639	446	1085	0.41106	0.41106		0.289	574.788	31.2118	543.576	62.4236	606	0.103009	0.546551
		0.08585	863	225	638	450	1088	0.413603	0.413603		0.2855	575.514	31.4865	544.027	62.9729	607	0.103744	0.549262
		0.08569	863	226	637	452	1089	0.41506	0.414679		0.28	576.238	31.7624	544.475	63.5249	608	0.104482	0.551961
		0.0856	864	226	638	452	1090	0.414679	0.414679		0.2793	576.96	32.0398	544.92	64.0795	609	0.105221	0.554648
		0.08533	866	228	638	456	1094	0.416819	0.416438		0.279	577.682	32.3184	545.363	64.6368	610	0.105962	0.557321
		0.08524	867	228	639	456	1095	0.416438	0.416438		0.2782	578.402	32.5984	545.803	65.1968	611	0.106705	0.559982
		0.08502	867	229	638	458	1096	0.417883	0.417502		0.2779	579.12	32.8797	546.241	65.7594	612	0.10745	0.562629
		0.085	868	229	639	458	1097	0.417502	0.417502		0.2774	579.838	33.1624	546.675	66.3247	613	0.108197	0.565262
		0.08489	868	230	638	460	1098	0.418944	0.418562		0.2751	580.554	33.4463	547.107	66.8926	614	0.108946	0.567882
		0.08481	869	230	639	460	1099	0.418562	0.418562		0.274	581.268	33.7315	547.537	67.4631	615	0.109696	0.570488
		0.08479	869	232	637	464	1101	0.421435	0.421435		0.2663	581.982	34.0181	547.964	68.0362	616	0.110448	0.57308
		0.08472	869	234	635	468	1103	0.424297	0.422383		0.2654	582.694	34.3059	548.388	68.6118	617	0.111202	0.575658
		0.08455	870	234	636	468	1104	0.423913	0.422383		0.2601	583.405	34.595	548.81	69.19	618	0.111958	0.578222
		0.08429	874	234	640	468	1108	0.422383	0.422383		0.2582	584.115	34.8854	549.229	69.7708	619	0.112715	0.580771
		0.08422	874	235	639	470	1109	0.423805	0.423805		0.2559	584.823	35.1771	549.646	70.3541	620	0.113474	0.583306
		0.08403	874	236	638	472	1110	0.425225	0.424842		0.2547	585.53	35.47	550.06	70.9399	621	0.114235	0.585826
		0.08386	875	236	639	472	1111	0.424842	0.424842		0.2522	586.236	35.7641	550.472	71.5283	622	0.114997	0.588331
		0.08377	875	237	638	474	1112	0.426259	0.426259		0.2507	586.94	36.0595	550.881	72.1191	623	0.115761	0.590821
		0.08375	875	238	637	476	1113	0.427673	0.426906		0.2499	587.644	36.3562	551.288	72.7124	624	0.116526	0.593296
		0.08352	876	238	638	476	1114	0.427289	0.426906		0.249	588.346	36.6541	551.692	73.3081	625	0.117293	0.595756
		0.08347	877	238	639	476	1115	0.426906	0.426906		0.2483	589.047	36.9532	552.094	73.9063	626	0.118061	0.5982
		0.08334	877	239	638	478	1116	0.428315	0.428315		0.2467	589.747	37.2535	552.493	74.507	627	0.118831	0.600629
		0.08326	877	240	637	480	1117	0.429722	0.429338		0.2466	590.445	37.555	552.89	75.11	628	0.119602	0.604244
		0.08317	878	240	638	480	1118	0.429338	0.429338		0.2466	591.142	37.8577	553.285	75.7154	629	0.120374	0.604244
		0.083	878	241	637	482	1119	0.430742	0.429973		0.2441	591.838	38.1616	553.677	76.3233	630	0.121148	0.607823
		0.08296	879	241	638	482	1120	0.430357	0.429973		0.2435	592.533	38.4667	554.067	76.9335	631	0.121923	0.61019
		0.08281	880	241	639	482	1121	0.429973	0.429973		0.2419	593.227	38.773	554.454	77.546	632	0.122699	0.61254
		0.08274	880	243	637	486	1123	0.432769	0.432384		0.2403	593.92	39.0804	554.839	78.1609	633	0.123477	0.614875
		0.08266	881	243	638	486	1124	0.432384	0.432384		0.2402	594.611	39.389	555.222	78.7781	634	0.124256	0.617194
		0.08248	881	244	637	488	1125	0.433778	0.433778		0.2396	595.301	39.6988	555.602	79.3976	635	0.125036	0.619496
		0.08246	882	245	637	490	1127	0.434783	0.434397		0.2386	595.99	40.0097	555.981	80.0193	636	0.125817	0.621782
		0.08223	883	245	638	490	1128	0.434397	0.434397		0.2375	596.678	40.3217	556.357	80.6434	637	0.126599	0.624052
		0.08205	884	246	638	492	1130	0.435398	0.435009		0.237	597.365	40.6348	556.73	81.2697	638	0.127382	0.626306
		0.08194	884	247	637	494	1131	0.436782	0.435009		0.2366	598.051	40.9491	557.102	81.8982	639	0.128166	0.628544
		0.08188	884	248	636	496	1132	0.438163	0.435009		0.2354	598.735	41.2645	557.471	82.529	640	0.128952	0.630765
		0.08162	885	248	637	496	1133	0.437776	0.435009		0.2343	599.419	41.581	557.838	83.162	641	0.129738	0.63297
		0.08153	886	248	638	496	1134	0.43739	0.435009		0.2339	600.101	41.8986	558.203	83.7971	642	0.130525	0.635158
		0.0814	887	248	639	496	1135	0.437004	0.435009		0.2338	600.783	42.2172	558.566	84.4345	643	0.131313	0.63733
		0.08132	888	248	640	496	1136	0.43662	0.435009		0.2335	601.463	42.537	558.926	85.0739	644	0.132102	0.639485
		0.08128	889	248	641	496	1137	0.436236	0.435009		0.2333	602.142	42.8578	559.284	85.7156	645	0.132892	0.641623
		0.08111	889	249	640	498	1138	0.43761	0.435009		0.2321	602.82	43.1797	559.641	86.3593	646	0.133683	0.643746
		0.08099	890	249	641	498	1139	0.437226	0.435009		0.2307	603.497	43.5026	559.995	87.0052	647	0.134475	0.645851
		0.08097	890	250	640	500	1140	0.438596	0.435009		0.2305	604.173	43.8266	560.347	87.6531	648	0.135267	0.64794
		0.08086	892	250	642	500	1142	0.437828	0.435009		0.2294	604.848	44.1516	560.697	88.3031	649	0.13606	0.650012
		0.08068	896	250	646	500	1146	0.4363	0.435009		0.2289	605.522	44.4776	561.045	88.9552	650	0.136854	0.652068
		0.08061	897	251	646	502	1148	0.437282	0.435009		0.2286	606.195	44.8046	561.391	89.6093	651	0.137649	0.654107
		0.08023	898	251	647	502	1149	0.436902	0.435009		0.2256	606.867	45.1327	561.735	90.2654	652	0.138444	0.656129
		0.08008	902	251	651	502	1153	0.435386	0.435009		0.2253	607.538	45.4618	562.076	90.9235	653	0.13924	0.658135
		0.07995	903	251	652	502	1154	0.435009	0.435009		0.2247	608.208	45.7918	562.416	91.5837	654	0.140036	0.661112
		0.07975	903	252	651	504	1155	0.436364	0.436364		0.2247	608.877	46.1229	562.754	92.2458	655	0.140833	0.661112
		0.07973	903	253	650	506	1156	0.437716	0.437554		0.224	609.545	46.4549	563.09	92.9098	656	0.141631	0.664052
		0.07965	904	254	650	508	1158	0.438687	0.437554		0.2223	610.212	46.7879	563.424	93.5758	657	0.142429	0.665992
		0.07939	905	254	651	508	1159	0.438309	0.437554		0.2215	610.878	47.1219	563.756	94.2437	658	0.143228	0.667914
		0.07922	906	254	652	508	1160	0.437931	0.437554		0.2203	611.543	47.4568	564.086	94.9135	659	0.144027	0.669821
		0.0792	907	254	653	508	1161	0.437554	0.437554		0.2199	612.207	47.7926	564.415	95.5853	660	0.144826	0.67171
		0.07905	908	255	653	510	1163	0.438521	0.438521		0.2191	612.871	48.1294	564.741	96.2588	661	0.145626	0.673584
		0.07888	908	256	652	512	1164	0.439863	0.439863		0.2174	613.533	48.4671	565.066	96.9343	662	0.146426	0.676363
		0.07883	908	257	651	514	1165	0.441202	0.440823		0.2174	614.194	48.8058	565.388	97.6116	663	0.147227	0.676363
		0.07873	909	257	652	514	1166	0.440823	0.440823		0.2171	614.855	49.1453	565.709	98.2907	664	0.148028	0.679105
		0.07859	909	260	649	520	1169	0.444825	0.444825		0.2167	615.514	49.4858	566.028	98.9716	665	0.148829	0.680913
		0.07839	909	261	648	522	1170	0.446154	0.445392		0.2158	616.173	49.8271	566.346	99.6543	666	0.149631	0.682704
		0.07835	910	261	649	522	1171	0.445773	0.445392		0.2141	616.831	50.1694	566.661	100.339	667	0.150433	0.684479
		0.07833	911	261	650	522	1172	0.445392	0.445392		0.2138	617.488	50.5125	566.975	101.025	668	0.151235	0.686239
		0.07819	911	262	649	524	1173	0.446718	0.446337		0.2137	618.144	50.8565	567.287	101.713	669	0.152037	0.688847
		0.07818	912	262	650	524	1174	0.446337	0.446337		0.2137	618.799	51.2013	567.597	102.403	670	0.15284	0.688847
		0.07802	912	263	649	526	1175	0.44766	0.447279		0.2125	619.453	51.5471	567.906	103.094	671	0.153642	0.691419
		0.07797	913	263	650	526	1176	0.447279	0.447279		0.2108	620.106	51.8936	568.213	103.787	672	0.154445	0.693114
		0.07785	913	264	649	528	1177	0.448598	0.448217		0.2091	620.759	52.241	568.518	104.482	673	0.155248	0.694793
		0.0778	914	264	650	528	1178	0.448217	0.448217		0.2075	621.411	52.5892	568.822	105.178	674	0.156051	0.696456
		0.07776	914	265	649	530	1179	0.449534	0.449534		0.2058	622.062	52.9383	569.123	105.877	675	0.156854	0.698103
		0.07756	914	266	648	532	1180	0.450847	0.450466		0.2055	622.712	53.2882	569.424	106.576	676	0.157657	0.699735
		0.0775	915	266	649	532	1181	0.450466	0.450466		0.2041	623.361	53.6388	569.722	107.278	677	0.15846	0.701351
		0.07747	915	267	648	534	1182	0.451777	0.451777		0.2031	624.01	53.9903	570.019	107.981	678	0.159263	0.702952
		0.07737	916	268	648	536	1184	0.452703	0.452703		0.2025	624.657	54.3426	570.315	108.685	679	0.160066	0.704537
		0.07733	916	269	647	538	1185	0.454008	0.453243		0.2024	625.304	54.6956	570.609	109.391	680	0.160869	0.706106
		0.07717	917	269	648	538	1186	0.453626	0.453243		0.2008	625.951	55.0495	570.901	110.099	681	0.161672	0.707661
		0.07716	918	269	649	538	1187	0.453243	0.453243		0.1991	626.596	55.4041	571.192	110.808	682	0.162475	0.709964
		0.07699	918	270	648	540	1188	0.454545	0.454163		0.1991	627.241	55.7594	571.481	111.519	683	0.163278	0.709964
		0.07697	919	270	649	540	1189	0.454163	0.454163		0.1978	627.884	56.1155	571.769	112.231	684	0.16408	0.712232
		0.0769	919	271	648	542	1190	0.455462	0.455462		0.1975	628.528	56.4724	572.055	112.945	685	0.164883	0.713726
		0.07678	919	272	647	544	1191	0.456759	0.456759		0.1974	629.17	56.83	572.34	113.66	686	0.165685	0.715205
		0.07665	919	273	646	546	1192	0.458054	0.456904		0.1959	629.812	57.1883	572.623	114.377	687	0.166487	0.716669
		0.07658	920	273	647	546	1193	0.45767	0.456904		0.1957	630.453	57.5474	572.905	115.095	688	0.167289	0.718118
		0.07651	921	273	648	546	1194	0.457286	0.456904		0.1949	631.093	57.9072	573.186	115.814	689	0.16809	0.719553
		0.07648	922	273	649	546	1195	0.456904	0.456904		0.1948	631.732	58.2676	573.465	116.535	690	0.168892	0.720973
		0.07641	922	274	648	548	1196	0.458194	0.457429		0.194	632.371	58.6288	573.742	117.258	691	0.169693	0.722379
		0.07623	923	274	649	548	1197	0.457811	0.457429		0.1926	633.009	58.9907	574.019	117.981	692	0.170493	0.72377
		0.07613	924	274	650	548	1198	0.457429	0.457429		0.1923	633.647	59.3533	574.293	118.707	693	0.171294	0.725147
		0.07605	924	275	649	550	1199	0.458716	0.458333		0.1921	634.283	59.7166	574.567	119.433	694	0.172094	0.72651
		0.0757	925	275	650	550	1200	0.458333	0.458333		0.1912	634.92	60.0805	574.839	120.161	695	0.172893	0.728528
		0.07553	925	276	649	552	1201	0.459617	0.458472		0.1912	635.555	60.4451	575.11	120.89	696	0.173693	0.728528
		0.07542	926	276	650	552	1202	0.459235	0.458472		0.1905	636.19	60.8103	575.379	121.621	697	0.174492	0.730514
		0.07536	927	276	651	552	1203	0.458853	0.458472		0.1898	636.824	61.1762	575.648	122.352	698	0.17529	0.731821
		0.07528	928	276	652	552	1204	0.458472	0.458472		0.189	637.457	61.5428	575.914	123.086	699	0.176088	0.733115
		0.07519	928	277	651	554	1205	0.459751	0.459751		0.1888	638.09	61.91	576.18	123.82	700	0.176886	0.734394
		0.07504	929	278	651	556	1207	0.460646	0.45977		0.1883	638.722	62.2778	576.444	124.556	701	0.177683	0.736289
		0.07502	931	279	652	558	1210	0.461157	0.45977		0.1883	639.354	62.6463	576.707	125.293	702	0.178479	0.736289
		0.07501	932	279	653	558	1211	0.460776	0.45977		0.187	639.985	63.0154	576.969	126.031	703	0.179276	0.738153
		0.07486	932	280	652	560	1212	0.462046	0.45977		0.1869	640.615	63.3851	577.23	126.77	704	0.180071	0.739379
		0.07476	933	280	653	560	1213	0.461665	0.45977		0.1867	641.245	63.7553	577.489	127.511	705	0.180866	0.740593
		0.0747	934	280	654	560	1214	0.461285	0.45977		0.1852	641.874	64.1262	577.748	128.252	706	0.181661	0.741793
		0.07454	935	280	655	560	1215	0.460905	0.45977		0.1841	642.502	64.4977	578.005	128.995	707	0.182455	0.74298
		0.07442	938	280	658	560	1218	0.45977	0.45977		0.1834	643.13	64.8698	578.26	129.74	708	0.183248	0.744155
		0.07438	938	281	657	562	1219	0.461034	0.460656		0.1831	643.758	65.2425	578.515	130.485	709	0.184041	0.745317
		0.07423	939	281	658	562	1220	0.460656	0.460656		0.1816	644.384	65.6157	578.769	131.231	710	0.184833	0.746467
		0.07399	940	282	658	564	1222	0.461538	0.461161		0.1811	645.01	65.9895	579.021	131.979	711	0.185624	0.747604
		0.07378	941	282	659	564	1223	0.461161	0.461161		0.1797	645.636	66.3639	579.272	132.728	712	0.186415	0.748728
		0.07374	941	283	658	566	1224	0.462418	0.462041		0.179	646.261	66.7388	579.522	133.478	713	0.187206	0.750392
		0.07363	942	283	659	566	1225	0.462041	0.462041		0.179	646.886	67.1143	579.771	134.229	714	0.187995	0.750392
		0.07356	942	284	658	568	1226	0.463295	0.462164		0.1789	647.51	67.4903	580.019	134.981	715	0.188784	0.752029
		0.07353	943	284	659	568	1227	0.462918	0.462164		0.1779	648.133	67.8668	580.266	135.734	716	0.189572	0.753639
		0.07347	944	284	660	568	1228	0.462541	0.462164		0.1779	648.756	68.2439	580.512	136.488	717	0.19036	0.753639
		0.07342	945	284	661	568	1229	0.462164	0.462164		0.1768	649.378	68.6215	580.757	137.243	718	0.191146	0.755222
		0.07341	946	285	661	570	1231	0.463038	0.462272		0.1758	650	68.9996	581.001	137.999	719	0.191932	0.756263
		0.07331	947	286	661	572	1233	0.463909	0.462272		0.1751	650.622	69.3783	581.243	138.757	720	0.192717	0.757293
		0.0732	948	286	662	572	1234	0.463533	0.462272		0.174	651.243	69.7575	581.485	139.515	721	0.193502	0.758311
		0.07306	949	286	663	572	1235	0.463158	0.462272		0.1738	651.863	70.1371	581.726	140.274	722	0.194286	0.759318
		0.07305	950	286	664	572	1236	0.462783	0.462272		0.1737	652.483	70.5173	581.965	141.035	723	0.195069	0.760313
		0.07298	950	287	663	574	1237	0.464026	0.462272		0.1731	653.102	70.8979	582.204	141.796	724	0.195851	0.761298
		0.07288	952	287	665	574	1239	0.463277	0.462272		0.1723	653.721	71.2791	582.442	142.558	725	0.196632	0.762272
		0.07278	953	287	666	574	1240	0.462903	0.462272		0.1717	654.339	71.6607	582.679	143.321	726	0.197412	0.763234
		0.07274	954	287	667	574	1241	0.46253	0.462272		0.1715	654.957	72.0428	582.914	144.086	727	0.198192	0.764186
		0.07271	954	288	666	576	1242	0.463768	0.462272		0.1701	655.575	72.4253	583.149	144.851	728	0.198971	0.765127
		0.07265	955	288	667	576	1243	0.463395	0.462272		0.1696	656.192	72.8084	583.383	145.617	729	0.199749	0.766058
		0.07264	956	288	668	576	1244	0.463023	0.462272		0.1694	656.808	73.1918	583.616	146.384	730	0.200526	0.767888
		0.07254	957	288	669	576	1245	0.462651	0.462272		0.1694	657.424	73.5758	583.848	147.152	731	0.201302	0.767888
		0.07251	958	288	670	576	1246	0.462279	0.462272		0.1694	658.04	73.9602	584.08	147.92	732	0.202077	0.767888
		0.07241	958	289	669	578	1247	0.463512	0.462272		0.1681	658.655	74.345	584.31	148.69	733	0.202851	0.769677
		0.07237	959	289	670	578	1248	0.463141	0.462272		0.1674	659.27	74.7303	584.539	149.461	734	0.203625	0.770557
		0.07224	959	290	669	580	1249	0.464371	0.462272		0.1662	659.884	75.116	584.768	150.232	735	0.204397	0.771426
		0.07211	961	290	671	580	1251	0.463629	0.462272		0.1659	660.498	75.5022	584.996	151.004	736	0.205169	0.772286
		0.07202	962	290	672	580	1252	0.463259	0.462272		0.1652	661.111	75.8887	585.223	151.777	737	0.20594	0.773136
		0.07198	963	290	673	580	1253	0.462889	0.462272		0.1648	661.724	76.2757	585.449	152.551	738	0.206709	0.773976
		0.07185	963	291	672	582	1254	0.464115	0.462272		0.1639	662.337	76.6631	585.674	153.326	739	0.207478	0.775218
		0.07174	964	291	673	582	1255	0.463745	0.462272		0.1639	662.949	77.0509	585.898	154.102	740	0.208246	0.775218
		0.07172	965	291	674	582	1256	0.463376	0.462272		0.1637	663.561	77.4391	586.122	154.878	741	0.209013	0.77644
		0.0716	966	291	675	582	1257	0.463007	0.462272		0.1636	664.172	77.8278	586.344	155.656	742	0.209778	0.777242
		0.07147	967	291	676	582	1258	0.462639	0.462272		0.1632	664.783	78.2168	586.566	156.434	743	0.210543	0.778036
		0.07123	968	291	677	582	1259	0.462272	0.462272		0.1631	665.394	78.6062	586.788	157.212	744	0.211307	0.779595
		0.07122	968	292	676	584	1260	0.463492	0.463492		0.1631	666.004	78.996	587.008	157.992	745	0.21207	0.779595
		0.07087	969	294	675	588	1263	0.465558	0.46519		0.1631	666.614	79.3862	587.228	158.772	746	0.212832	0.779595
		0.07076	970	294	676	588	1264	0.46519	0.46519		0.163	667.223	79.7767	587.447	159.553	747	0.213592	0.79634
		0.07057	970	296	674	592	1266	0.467615	0.467245		0.163	667.832	80.1677	587.665	160.335	748	0.214352	0.79634
		0.07053	971	296	675	592	1267	0.467245	0.467245		0.163	668.441	80.559	587.882	161.118	749	0.215111	0.79634
		0.0704	971	297	674	594	1268	0.468454	0.468085		0.163	669.049	80.9506	588.099	161.901	750	0.215868	0.79634
		0.07029	972	297	675	594	1269	0.468085	0.468085		0.163	669.657	81.3427	588.315	162.685	751	0.216625	0.79634
		0.07024	972	298	674	596	1270	0.469291	0.468553		0.163	670.265	81.7351	588.53	163.47	752	0.21738	0.79634
		0.07017	973	298	675	596	1271	0.468922	0.468553		0.163	670.872	82.1278	588.744	164.256	753	0.218135	0.79634
		0.07011	974	298	676	596	1272	0.468553	0.468553		0.163	671.479	82.5209	588.958	165.042	754	0.218888	0.79634
		0.07006	974	299	675	598	1273	0.469756	0.469756		0.163	672.086	82.9143	589.171	165.829	755	0.219641	0.79634
		0.06995	974	300	674	600	1274	0.470958	0.469945		0.163	672.692	83.3081	589.384	166.616	756	0.220392	0.79634
		0.06973	976	300	676	600	1276	0.470219	0.469945		0.163	673.298	83.7022	589.596	167.404	757	0.221142	0.79634
		0.06967	976	301	675	602	1277	0.471417	0.469945		0.163	673.903	84.0967	589.807	168.193	758	0.221891	0.79634
		0.06951	978	301	677	602	1279	0.47068	0.469945		0.163	674.509	84.4915	590.017	168.983	759	0.222639	0.79634
		0.0694	979	301	678	602	1280	0.470313	0.469945		0.163	675.113	84.8866	590.227	169.773	760	0.223386	0.79634
		0.06939	980	301	679	602	1281	0.469945	0.469945		0.163	675.718	85.282	590.436	170.564	761	0.224131	0.79634
		0.06913	980	302	678	604	1282	0.471139	0.470772		0.163	676.322	85.6778	590.644	171.356	762	0.224876	0.79634
		0.06888	981	302	679	604	1283	0.470772	0.470772		0.163	676.926	86.0738	590.852	172.148	763	0.225619	0.79634
		0.06873	982	303	679	606	1285	0.471595	0.471595		0.163	677.53	86.4702	591.06	172.94	764	0.226362	0.79634
		0.06868	982	304	678	608	1286	0.472784	0.47205		0.163	678.133	86.8669	591.266	173.734	765	0.227103	0.79634
		0.06858	984	304	680	608	1288	0.47205	0.47205		0.163	678.736	87.2639	591.472	174.528	766	0.227843	0.79634
		0.06857	985	305	680	610	1290	0.472868	0.472868		0.163	679.339	87.6612	591.678	175.322	767	0.228582	0.79634
		0.06847	985	306	679	612	1291	0.474051	0.474051		0.163	679.941	88.0587	591.883	176.117	768	0.22932	0.79634
		0.06832	985	308	677	616	1293	0.476411	0.476117		0.163	680.543	88.4566	592.087	176.913	769	0.230056	0.79634
		0.06824	985	309	676	618	1294	0.477589	0.476117		0.163	681.145	88.8548	592.29	177.71	770	0.230792	0.79634
		0.06801	986	309	677	618	1295	0.47722	0.476117		0.163	681.747	89.2532	592.494	178.506	771	0.231526	0.79634
		0.06773	989	309	680	618	1298	0.476117	0.476117		0.163	682.348	89.652	592.696	179.304	772	0.232259	0.79634
		0.06715	989	310	679	620	1299	0.47729	0.47619		0.163	682.949	90.051	592.898	180.102	773	0.232991	0.79634
		0.06687	990	310	680	620	1300	0.476923	0.47619		0.163	683.55	90.4503	593.099	180.901	774	0.233722	0.79634
		0.06651	991	310	681	620	1301	0.476556	0.47619		0.163	684.15	90.8499	593.3	181.7	775	0.234451	0.79634
		0.06645	992	310	682	620	1302	0.47619	0.47619		0.163	684.75	91.2497	593.501	182.499	776	0.23518	0.79634
		0.0662	992	311	681	622	1303	0.47736	0.476994		0.163	685.35	91.6498	593.7	183.3	777	0.235907	0.79634
		0.06618	993	311	682	622	1304	0.476994	0.476994		0.163	685.95	92.0502	593.9	184.1	778	0.236633	0.79634
		0.06579	993	312	681	624	1305	0.478161	0.477795		0.163	686.549	92.4508	594.098	184.902	779	0.237358	0.79634
		0.06571	994	312	682	624	1306	0.477795	0.477795		0.163	687.148	92.8517	594.297	185.703	780	0.238081	0.79634
		0.06551	994	313	681	626	1307	0.478959	0.478959		0.163	687.747	93.2529	594.494	186.506	781	0.238804	0.79634
		0.06523	994	314	680	628	1308	0.480122	0.479389		0.163	688.346	93.6543	594.691	187.309	782	0.239525	0.79634
		0.06494	996	314	682	628	1310	0.479389	0.479389		0.163	688.944	94.056	594.888	188.112	783	0.240245	0.79634
		0.06493	996	315	681	630	1311	0.480549	0.479939		0.163	689.542	94.4579	595.084	188.916	784	0.240964	0.79634
		0.06485	997	315	682	630	1312	0.480183	0.479939		0.163	690.14	94.86	595.28	189.72	785	0.241682	0.79634
		0.06451	997	316	681	632	1313	0.48134	0.479939		0.163	690.738	95.2624	595.475	190.525	786	0.242398	0.79634
		0.0643	998	316	682	632	1314	0.480974	0.479939		0.163	691.335	95.665	595.67	191.33	787	0.243113	0.79634
		0.0642	999	316	683	632	1315	0.480608	0.479939		0.163	691.932	96.0679	595.864	192.136	788	0.243827	0.79634
		0.06407	1000	316	684	632	1316	0.480243	0.479939		0.163	692.529	96.471	596.058	192.942	789	0.24454	0.79634
		0.06388	1000	317	683	634	1317	0.481397	0.479939		0.163	693.126	96.8743	596.251	193.749	790	0.245251	0.79634
		0.06356	1001	317	684	634	1318	0.481032	0.479939		0.163	693.722	97.2779	596.444	194.556	791	0.245962	0.79634
		0.06335	1003	317	686	634	1320	0.480303	0.479939		0.163	694.318	97.6817	596.637	195.363	792	0.246671	0.79634
		0.06329	1004	317	687	634	1321	0.479939	0.479939		0.163	694.914	98.0857	596.829	196.171	793	0.247379	0.79634
		0.06292	1004	318	686	636	1322	0.481089	0.481089		0.1629	695.51	98.4899	597.02	196.98	794	0.248085	0.81786
		0.06248	1004	319	685	638	1323	0.482237	0.482237		0.1629	696.106	98.8944	597.211	197.789	795	0.248791	0.81786
		0.06216	1005	320	685	640	1325	0.483019	0.483019		0.1629	696.701	99.299	597.402	198.598	796	0.249495	0.81786
		0.06214	1005	321	684	642	1326	0.484163	0.484163		0.1629	697.296	99.7039	597.592	199.408	797	0.250198	0.81786
		0.06213	1005	322	683	644	1327	0.485305	0.484211		0.1629	697.891	100.109	597.782	200.218	798	0.2509	0.81786
		0.0617	1006	322	684	644	1328	0.48494	0.484211		0.1629	698.486	100.514	597.971	201.029	799	0.2516	0.81786
		0.06139	1007	322	685	644	1329	0.484575	0.484211		0.1629	699.08	100.92	598.16	201.84	800	0.252299	0.81786
		0.06102	1008	322	686	644	1330	0.484211	0.484211		0.1629	699.675	101.325	598.349	202.651	801	0.252997	0.81786
		0.06091	1008	323	685	646	1331	0.485349	0.484985		0.1629	700.269	101.731	598.537	203.463	802	0.253694	0.81786
		0.06089	1009	323	686	646	1332	0.484985	0.484985		0.1629	700.862	102.138	598.725	204.275	803	0.25439	0.81786
		0.06049	1010	325	685	650	1335	0.486891	0.486527		0.1629	701.456	102.544	598.912	205.088	804	0.255084	0.81786
		0.0604	1011	325	686	650	1336	0.486527	0.486527		0.1629	702.05	102.95	599.099	205.901	805	0.255777	0.81786
		0.06017	1011	326	685	652	1337	0.487659	0.487294		0.1629	702.643	103.357	599.286	206.714	806	0.256469	0.81786
		0.05995	1012	326	686	652	1338	0.487294	0.487294		0.1629	703.236	103.764	599.472	207.528	807	0.25716	0.81786
		0.05972	1012	327	685	654	1339	0.488424	0.487332		0.1629	703.829	104.171	599.658	208.342	808	0.257849	0.81786
		0.05932	1013	327	686	654	1340	0.48806	0.487332		0.1629	704.422	104.578	599.844	209.156	809	0.258537	0.81786
		0.05892	1014	327	687	654	1341	0.487696	0.487332		0.1629	705.014	104.986	600.029	209.971	810	0.259224	0.81786
		0.0584	1015	327	688	654	1342	0.487332	0.487332		0.1629	705.607	105.393	600.213	210.787	811	0.259909	0.81786
		0.05823	1015	328	687	656	1343	0.488459	0.488459		0.1629	706.199	105.801	600.398	211.602	812	0.260594	0.81786
		0.05818	1015	329	686	658	1344	0.489583	0.489251		0.1629	706.791	106.209	600.582	212.418	813	0.261277	0.81786
		0.0581	1015	330	685	660	1345	0.490706	0.489251		0.1629	707.383	106.617	600.766	213.234	814	0.261959	0.81786
		0.05802	1016	330	686	660	1346	0.490342	0.489251		0.1629	707.974	107.026	600.949	214.051	815	0.262639	0.81786
		0.05792	1017	330	687	660	1347	0.489978	0.489251		0.1629	708.566	107.434	601.132	214.868	816	0.263319	0.81786
		0.05763	1018	330	688	660	1348	0.489614	0.489251		0.1629	709.157	107.843	601.315	215.685	817	0.263997	0.81786
		0.05745	1019	330	689	660	1349	0.489251	0.489251		0.1629	709.748	108.252	601.497	216.503	818	0.264674	0.81786
		0.05707	1019	331	688	662	1350	0.49037	0.49037		0.1629	710.339	108.661	601.679	217.321	819	0.265349	0.81786
		0.05696	1019	333	686	666	1352	0.492604	0.492604		0.1629	710.93	109.07	601.86	218.14	820	0.266024	0.81786
		0.05683	1019	336	683	672	1355	0.495941	0.49521		0.1629	711.521	109.479	602.042	218.958	821	0.266697	0.81786
		0.05671	1020	336	684	672	1356	0.495575	0.49521		0.1629	712.111	109.889	602.223	219.777	822	0.267369	0.81786
		0.05659	1021	336	685	672	1357	0.49521	0.49521		0.1629	712.702	110.298	602.403	220.597	823	0.26804	0.81786
		0.05658	1021	337	684	674	1358	0.496318	0.496318		0.1629	713.292	110.708	602.584	221.416	824	0.268709	0.81786
		0.05626	1021	339	682	678	1360	0.498529	0.498529		0.1629	713.882	111.118	602.764	222.236	825	0.269377	0.81786
		0.05606	1021	341	680	682	1362	0.500734	0.498903		0.1629	714.472	111.528	602.944	223.056	826	0.270044	0.81786
		0.05603	1022	341	681	682	1363	0.500367	0.498903		0.1629	715.061	111.939	603.123	223.877	827	0.27071	0.81786
		0.05602	1023	341	682	682	1364	0.5	0.498903		0.1629	715.651	112.349	603.302	224.698	828	0.271374	0.81786
		0.05546	1024	341	683	682	1365	0.499634	0.498903		0.1629	716.24	112.76	603.481	225.519	829	0.272037	0.81786
		0.05511	1025	341	684	682	1366	0.499268	0.498903		0.1629	716.83	113.17	603.659	226.341	830	0.272699	0.81786
		0.05494	1026	341	685	682	1367	0.498903	0.498903		0.1629	717.419	113.581	603.838	227.162	831	0.27336	0.81786
		0.05489	1026	342	684	684	1368	0.5	0.499635		0.1629	718.008	113.992	604.016	227.984	832	0.27402	0.81786
		0.05443	1027	342	685	684	1369	0.499635	0.499635		0.1629	718.597	114.403	604.193	228.807	833	0.274678	0.81786
		0.05423	1027	343	684	686	1370	0.50073	0.5		0.1629	719.185	114.815	604.371	229.629	834	0.275335	0.81786
		0.05401	1028	343	685	686	1371	0.500365	0.5		0.1629	719.774	115.226	604.548	230.452	835	0.275991	0.81786
		0.05381	1029	343	686	686	1372	0.5	0.5		0.1629	720.362	115.638	604.725	231.275	836	0.276645	0.81786
		0.05353	1029	344	685	688	1373	0.501092	0.500364		0.1629	720.951	116.049	604.901	232.099	837	0.277299	0.81786
		0.0535	1030	344	686	688	1374	0.500728	0.500364		0.1629	721.539	116.461	605.077	232.923	838	0.277951	0.81786
		0.05347	1031	344	687	688	1375	0.500364	0.500364		0.1629	722.127	116.873	605.253	233.747	839	0.278602	0.81786
		0.05341	1031	345	686	690	1376	0.501453	0.501089		0.1629	722.715	117.285	605.429	234.571	840	0.279251	0.81786
		0.05336	1032	345	687	690	1377	0.501089	0.501089		0.1629	723.302	117.698	605.605	235.395	841	0.2799	0.81786
		0.05243	1032	347	685	694	1379	0.503263	0.503263		0.1629	723.89	118.11	605.78	236.22	842	0.280547	0.81786
		0.0522	1032	348	684	696	1380	0.504348	0.503983		0.1629	724.477	118.523	605.955	237.045	843	0.281193	0.81786
		0.05212	1033	348	685	696	1381	0.503983	0.503983		0.1611	725.065	118.935	606.129	237.871	844	0.281837	0.82532
		0.05179	1033	349	684	698	1382	0.505065	0.504335		0.1607	725.652	119.348	606.304	238.696	845	0.282481	0.825574
		0.05169	1034	349	685	698	1383	0.5047	0.504335		0.1605	726.239	119.761	606.478	239.522	846	0.283123	0.825825
		0.05153	1035	349	686	698	1384	0.504335	0.504335		0.1601	726.826	120.174	606.652	240.348	847	0.283764	0.826074
		0.05147	1035	350	685	700	1385	0.505415	0.505051		0.158	727.413	120.587	606.826	241.174	848	0.284404	0.826442
		0.05123	1036	350	686	700	1386	0.505051	0.505051		0.158	727.999	121.001	606.999	242.001	849	0.285042	0.826442
		0.05101	1036	351	685	702	1387	0.506128	0.506128		0.1574	728.586	121.414	607.172	242.828	850	0.28568	0.826805
		0.05099	1036	352	684	704	1388	0.507205	0.506438		0.1568	729.173	121.827	607.345	243.655	851	0.286316	0.827044
		0.05088	1036	353	683	706	1389	0.508279	0.506438		0.1555	729.759	122.241	607.518	244.482	852	0.286951	0.827281
		0.05053	1037	353	684	706	1390	0.507914	0.506438		0.1546	730.345	122.655	607.69	245.31	853	0.287585	0.827515
		0.05036	1038	353	685	706	1391	0.507549	0.506438		0.1538	730.931	123.069	607.863	246.137	854	0.288217	0.827747
		0.05029	1039	353	686	706	1392	0.507184	0.506438		0.1537	731.517	123.483	608.035	246.965	855	0.288848	0.827976
		0.05022	1040	353	687	706	1393	0.50682	0.506438		0.1532	732.103	123.897	608.206	247.794	856	0.289479	0.828204
		0.05019	1041	353	688	706	1394	0.506456	0.506438		0.1531	732.689	124.311	608.378	248.622	857	0.290107	0.828429
		0.05007	1041	354	687	708	1395	0.507527	0.506438		0.1524	733.275	124.725	608.549	249.451	858	0.290735	0.828652
		0.04962	1042	354	688	708	1396	0.507163	0.506438		0.1516	733.86	125.14	608.72	250.28	859	0.291362	0.828873
		0.04961	1043	354	689	708	1397	0.5068	0.506438		0.1505	734.446	125.554	608.891	251.109	860	0.291987	0.829091
		0.04916	1044	354	690	708	1398	0.506438	0.506438		0.1501	735.031	125.969	609.062	251.938	861	0.292611	0.829308
		0.04894	1044	355	689	710	1399	0.507505	0.507143		0.1476	735.616	126.384	609.233	252.767	862	0.293234	0.829522
		0.04891	1045	355	690	710	1400	0.507143	0.507143		0.1472	736.201	126.799	609.403	253.597	863	0.293855	0.829734
		0.04872	1045	356	689	712	1401	0.508208	0.508185		0.1467	736.786	127.214	609.573	254.427	864	0.294476	0.829945
		0.04863	1046	357	689	714	1403	0.508909	0.508185		0.1447	737.371	127.629	609.743	255.257	865	0.295095	0.830153
		0.04853	1047	357	690	714	1404	0.508547	0.508185		0.1443	737.956	128.044	609.912	256.088	866	0.295713	0.830359
		0.04838	1048	357	691	714	1405	0.508185	0.508185		0.1437	738.541	128.459	610.082	256.918	867	0.29633	0.830564
		0.0483	1048	358	690	716	1406	0.509246	0.509246		0.1428	739.126	128.874	610.251	257.749	868	0.296946	0.830766
		0.04828	1048	359	689	718	1407	0.510306	0.510306		0.1416	739.71	129.29	610.42	258.58	869	0.29756	0.830967
		0.04785	1048	360	688	720	1408	0.511364	0.511364		0.1405	740.294	129.706	610.589	259.411	870	0.298174	0.831165
		0.04784	1048	361	687	722	1409	0.51242	0.51242		0.1402	740.879	130.121	610.758	260.242	871	0.298786	0.831362
		0.04777	1048	362	686	724	1410	0.513475	0.513399		0.1389	741.463	130.537	610.926	261.074	872	0.299397	0.831557
		0.04755	1048	363	685	726	1411	0.514529	0.513399		0.1387	742.047	130.953	611.094	261.906	873	0.300007	0.83175
		0.0475	1049	363	686	726	1412	0.514164	0.513399		0.1384	742.631	131.369	611.262	262.738	874	0.300615	0.831941
		0.04738	1050	363	687	726	1413	0.5138	0.513399		0.138	743.215	131.785	611.43	263.57	875	0.301223	0.832131
		0.04732	1051	363	688	726	1414	0.513437	0.513399		0.1364	743.799	132.201	611.598	264.402	876	0.301829	0.832319
		0.04721	1052	364	688	728	1416	0.514124	0.513399		0.1359	744.383	132.617	611.765	265.235	877	0.302434	0.832505
		0.04702	1053	364	689	728	1417	0.513761	0.513399		0.1341	744.966	133.034	611.933	266.067	878	0.303038	0.832689
		0.04679	1054	364	690	728	1418	0.513399	0.513399		0.1339	745.55	133.45	612.1	266.9	879	0.303641	0.832872
		0.04654	1054	366	688	732	1420	0.515493	0.515493		0.1331	746.133	133.867	612.267	267.733	880	0.304242	0.833053
		0.04628	1054	367	687	734	1421	0.516538	0.516174		0.1325	746.717	134.283	612.433	268.567	881	0.304843	0.833233
		0.04622	1055	367	688	734	1422	0.516174	0.516174		0.1318	747.3	134.7	612.6	269.4	882	0.305442	0.833411
		0.04603	1055	368	687	736	1423	0.517217	0.516491		0.1304	747.883	135.117	612.766	270.234	883	0.30604	0.833587
		0.04597	1056	368	688	736	1424	0.516854	0.516491		0.1298	748.466	135.534	612.933	271.067	884	0.306637	0.833762
		0.04591	1057	368	689	736	1425	0.516491	0.516491		0.1297	749.049	135.951	613.099	271.901	885	0.307233	0.833935
		0.04581	1057	369	688	738	1426	0.517532	0.517483		0.1288	749.632	136.368	613.265	272.735	886	0.307828	0.834106
		0.04561	1057	370	687	740	1427	0.51857	0.517483		0.1278	750.215	136.785	613.43	273.57	887	0.308421	0.834276
		0.04541	1060	370	690	740	1430	0.517483	0.517483		0.1265	750.798	137.202	613.596	274.404	888	0.309014	0.834445
		0.04536	1060	371	689	742	1431	0.518519	0.518519		0.126	751.381	137.619	613.761	275.239	889	0.309605	0.834612
		0.04509	1060	372	688	744	1432	0.519553	0.518672		0.1258	751.963	138.037	613.927	276.073	890	0.310195	0.834778
		0.04496	1061	372	689	744	1433	0.519191	0.518672		0.1255	752.546	138.454	614.092	276.908	891	0.310784	0.834942
		0.04483	1062	372	690	744	1434	0.518828	0.518672		0.1253	753.128	138.872	614.257	277.743	892	0.311372	0.835105
		0.04477	1062	373	689	746	1435	0.519861	0.518672		0.1244	753.711	139.289	614.421	278.579	893	0.311958	0.835266
		0.04474	1063	373	690	746	1436	0.519499	0.518672		0.1241	754.293	139.707	614.586	279.414	894	0.312544	0.835427
		0.04447	1064	373	691	746	1437	0.519137	0.518672		0.1239	754.875	140.125	614.75	280.25	895	0.313128	0.835585
		0.04429	1065	373	692	746	1438	0.518776	0.518672		0.1237	755.457	140.543	614.914	281.086	896	0.313712	0.835743
		0.04418	1065	374	691	748	1439	0.519805	0.518672		0.1222	756.039	140.961	615.079	281.921	897	0.314294	0.835899
		0.04414	1067	374	693	748	1441	0.519084	0.518672		0.1205	756.621	141.379	615.243	282.757	898	0.314875	0.836053
		0.04411	1069	375	694	750	1444	0.519391	0.518672		0.1201	757.203	141.797	615.406	283.594	899	0.315455	0.836207
		0.04402	1070	375	695	750	1445	0.519031	0.518672		0.1196	757.785	142.215	615.57	284.43	900	0.316033	0.836359
		0.04394	1071	375	696	750	1446	0.518672	0.518672		0.1195	758.367	142.633	615.733	285.267	901	0.316611	0.83651
		0.0438	1071	376	695	752	1447	0.519696	0.519337		0.1193	758.948	143.052	615.897	286.103	902	0.317188	0.836659
		0.04376	1072	376	696	752	1448	0.519337	0.519337		0.1191	759.53	143.47	616.06	286.94	903	0.317763	0.836808
		0.0436	1072	377	695	754	1449	0.520359	0.520359		0.1189	760.112	143.888	616.223	287.777	904	0.318337	0.836955
		0.04346	1072	378	694	756	1450	0.521379	0.521379		0.1186	760.693	144.307	616.386	288.614	905	0.318911	0.837101
		0.04343	1072	379	693	758	1451	0.522398	0.522398		0.1182	761.274	144.726	616.549	289.451	906	0.319483	0.837246
		0.04341	1072	380	692	760	1452	0.523416	0.523056		0.1176	761.856	145.144	616.711	290.289	907	0.320054	0.83739
		0.04335	1073	380	693	760	1453	0.523056	0.523056		0.1174	762.437	145.563	616.874	291.126	908	0.320624	0.837532
		0.04317	1073	381	692	762	1454	0.524072	0.524072		0.1173	763.018	145.982	617.036	291.964	909	0.321192	0.837673
		0.04304	1074	382	692	764	1456	0.524725	0.524725		0.117	763.599	146.401	617.198	292.802	910	0.32176	0.837814
		0.04303	1074	383	691	766	1457	0.525738	0.525738		0.1166	764.18	146.82	617.36	293.64	911	0.322327	0.837953
		0.043	1074	384	690	768	1458	0.526749	0.526603		0.1164	764.761	147.239	617.522	294.478	912	0.322892	0.838159
		0.04279	1074	385	689	770	1459	0.527759	0.526603		0.1164	765.342	147.658	617.684	295.316	913	0.323457	0.838159
		0.04267	1075	385	690	770	1460	0.527397	0.526603		0.116	765.923	148.077	617.846	296.154	914	0.32402	0.838364
		0.04256	1077	385	692	770	1462	0.526676	0.526603		0.1159	766.504	148.496	618.007	296.993	915	0.324582	0.838498
		0.04249	1077	386	691	772	1463	0.527683	0.526603		0.1157	767.084	148.916	618.169	297.831	916	0.325144	0.838632
		0.04248	1078	386	692	772	1464	0.527322	0.526603		0.1156	767.665	149.335	618.33	298.67	917	0.325704	0.838765
		0.04238	1079	386	693	772	1465	0.526962	0.526603		0.1151	768.245	149.755	618.491	299.509	918	0.326263	0.838897
		0.04231	1080	386	694	772	1466	0.526603	0.526603		0.115	768.826	150.174	618.652	300.348	919	0.326821	0.839027
		0.04219	1080	387	693	774	1467	0.527607	0.527018		0.1145	769.406	150.594	618.813	301.187	920	0.327378	0.839222
		0.04204	1080	388	692	776	1468	0.52861	0.527018		0.1145	769.987	151.013	618.973	302.027	921	0.327933	0.839222
		0.04201	1080	389	691	778	1469	0.529612	0.527018		0.1139	770.567	151.433	619.134	302.866	922	0.328488	0.839477
		0.04183	1081	389	692	778	1470	0.529252	0.527018		0.1139	771.147	151.853	619.294	303.706	923	0.329042	0.839477
		0.04176	1082	389	693	778	1471	0.528892	0.527018		0.1133	771.727	152.273	619.455	304.545	924	0.329594	0.839666
		0.04169	1082	390	692	780	1472	0.529891	0.527018		0.1132	772.307	152.693	619.615	305.385	925	0.330146	0.839791
		0.04167	1083	390	693	780	1473	0.529532	0.527018		0.1126	772.888	153.112	619.775	306.225	926	0.330696	0.839915
		0.04145	1083	391	692	782	1474	0.530529	0.527018		0.1121	773.468	153.532	619.935	307.065	927	0.331246	0.840038
		0.04133	1084	391	693	782	1475	0.530169	0.527018		0.112	774.047	153.953	620.095	307.905	928	0.331794	0.840161
		0.04128	1085	391	694	782	1476	0.52981	0.527018		0.1119	774.627	154.373	620.255	308.745	929	0.332342	0.840282
		0.04127	1085	392	693	784	1477	0.530806	0.527018		0.1113	775.207	154.793	620.414	309.586	930	0.332888	0.840402
		0.04123	1086	392	694	784	1478	0.530447	0.527018		0.111	775.787	155.213	620.574	310.426	931	0.333433	0.840581
		0.04113	1087	392	695	784	1479	0.530088	0.527018		0.111	776.367	155.633	620.733	311.267	932	0.333977	0.840581
		0.04096	1087	393	694	786	1480	0.531081	0.527018		0.1107	776.946	156.054	620.892	312.108	933	0.334521	0.840817
		0.04088	1088	393	695	786	1481	0.530722	0.527018		0.1107	777.526	156.474	621.051	312.949	934	0.335063	0.840817
		0.04083	1089	393	696	786	1482	0.530364	0.527018		0.1102	778.105	156.895	621.21	313.79	935	0.335604	0.840992
		0.04079	1090	393	697	786	1483	0.530007	0.527018		0.11	778.685	157.315	621.369	314.631	936	0.336144	0.841107
		0.04076	1091	393	698	786	1484	0.52965	0.527018		0.1099	779.264	157.736	621.528	315.472	937	0.336683	0.841222
		0.0407	1092	393	699	786	1485	0.529293	0.527018		0.1097	779.843	158.157	621.687	316.313	938	0.337221	0.841335
		0.04064	1094	393	701	786	1487	0.528581	0.527018		0.1093	780.423	158.577	621.845	317.155	939	0.337758	0.841448
		0.04058	1095	393	702	786	1488	0.528226	0.527018		0.1087	781.002	158.998	622.004	317.996	940	0.338294	0.841561
		0.04054	1095	394	701	788	1489	0.529214	0.527018		0.1084	781.581	159.419	622.162	318.838	941	0.338829	0.841672
		0.04052	1097	394	703	788	1491	0.528504	0.527018		0.1082	782.16	159.84	622.32	319.68	942	0.339363	0.841783
		0.04035	1098	394	704	788	1492	0.52815	0.527018		0.108	782.739	160.261	622.478	320.522	943	0.339896	0.841893
		0.04034	1099	394	705	788	1493	0.527796	0.527018		0.1073	783.318	160.682	622.636	321.364	944	0.340428	0.842002
		0.04027	1100	394	706	788	1494	0.527443	0.527018		0.1068	783.897	161.103	622.794	322.206	945	0.340958	0.84211
		0.04022	1100	395	705	790	1495	0.528428	0.527018		0.1066	784.476	161.524	622.952	323.048	946	0.341488	0.842218
		0.0402	1101	395	706	790	1496	0.528075	0.527018		0.1065	785.055	161.945	623.11	323.89	947	0.342017	0.842325
		0.04016	1102	395	707	790	1497	0.527722	0.527018		0.1063	785.634	162.366	623.267	324.733	948	0.342545	0.842431
		0.0401	1103	395	708	790	1498	0.52737	0.527018		0.1059	786.212	162.788	623.425	325.575	949	0.343072	0.842537
		0.04003	1104	395	709	790	1499	0.527018	0.527018		0.1056	786.791	163.209	623.582	326.418	950	0.343598	0.842642
		0.03997	1104	396	708	792	1500	0.528	0.527297		0.1053	787.37	163.63	623.739	327.261	951	0.344123	0.842746
		0.03995	1105	396	709	792	1501	0.527648	0.527297		0.1052	787.948	164.052	623.897	328.103	952	0.344647	0.84285
		0.03986	1106	396	710	792	1502	0.527297	0.527297		0.1049	788.527	164.473	624.054	328.946	953	0.345169	0.842953
		0.03972	1106	397	709	794	1503	0.528277	0.528277		0.1045	789.105	164.895	624.21	329.79	954	0.345691	0.843055
		0.03965	1106	398	708	796	1504	0.529255	0.528552		0.1043	789.684	165.316	624.367	330.633	955	0.346212	0.843157
		0.03963	1107	398	709	796	1505	0.528904	0.528552		0.1038	790.262	165.738	624.524	331.476	956	0.346732	0.843358
		0.03958	1108	398	710	796	1506	0.528552	0.528552		0.1038	790.84	166.16	624.681	332.319	957	0.347251	0.843358
		0.03952	1108	399	709	798	1507	0.529529	0.529178		0.1038	791.419	166.581	624.837	333.163	958	0.347769	0.843358
		0.03943	1109	399	710	798	1508	0.529178	0.529178		0.1031	791.997	167.003	624.994	334.006	959	0.348286	0.843606
		0.0393	1109	400	709	800	1509	0.530152	0.530152		0.1031	792.575	167.425	625.15	334.85	960	0.348802	0.843606
		0.03929	1109	401	708	802	1510	0.531126	0.531126		0.1029	793.153	167.847	625.306	335.694	961	0.349317	0.843753
		0.03927	1109	403	706	806	1512	0.533069	0.533069		0.1025	793.731	168.269	625.462	336.538	962	0.349831	0.84385
		0.03925	1109	404	705	808	1513	0.534038	0.534038		0.1024	794.309	168.691	625.619	337.381	963	0.350344	0.843947
		0.03919	1109	405	704	810	1514	0.535007	0.535007		0.1018	794.887	169.113	625.774	338.226	964	0.350856	0.844043
		0.03917	1109	406	703	812	1515	0.535974	0.535974		0.1016	795.465	169.535	625.93	339.07	965	0.351368	0.844186
		0.03911	1109	407	702	814	1516	0.536939	0.536842		0.1016	796.043	169.957	626.086	339.914	966	0.351878	0.844186
		0.03906	1109	408	701	816	1517	0.537904	0.536842		0.1014	796.621	170.379	626.242	340.758	967	0.352387	0.844328
		0.03901	1110	408	702	816	1518	0.537549	0.536842		0.101	797.199	170.801	626.397	341.603	968	0.352895	0.844421
		0.03891	1111	408	703	816	1519	0.537196	0.536842		0.1009	797.776	171.224	626.553	342.447	969	0.353403	0.844515
		0.03886	1112	408	704	816	1520	0.536842	0.536842		0.1008	798.354	171.646	626.708	343.292	970	0.353909	0.844607
		0.03882	1112	409	703	818	1521	0.537804	0.537451		0.1001	798.932	172.068	626.864	344.136	971	0.354415	0.844699
		0.0387	1113	409	704	818	1522	0.537451	0.537451		0.1	799.509	172.491	627.019	344.981	972	0.354919	0.844791
		0.03867	1113	410	703	820	1523	0.538411	0.538411		0.09937	800.087	172.913	627.174	345.826	973	0.355423	0.844882
		0.03866	1114	411	703	822	1525	0.539016	0.539016		0.09934	800.664	173.336	627.329	346.671	974	0.355925	0.844973
		0.03833	1114	412	702	824	1526	0.539974	0.53962		0.09923	801.242	173.758	627.484	347.516	975	0.356427	0.845063
		0.03812	1115	412	703	824	1527	0.53962	0.53962		0.09862	801.819	174.181	627.639	348.361	976	0.356928	0.845152
		0.03801	1115	413	702	826	1528	0.540576	0.540222		0.09861	802.397	174.603	627.793	349.207	977	0.357427	0.845241
		0.03791	1116	413	703	826	1529	0.540222	0.540222		0.09848	802.974	175.026	627.948	350.052	978	0.357926	0.84533
		0.0379	1116	414	702	828	1530	0.541176	0.540823		0.09817	803.551	175.449	628.103	350.897	979	0.358424	0.845418
		0.03781	1117	414	703	828	1531	0.540823	0.540823		0.09784	804.129	175.871	628.257	351.743	980	0.358921	0.845505
		0.03753	1117	415	702	830	1532	0.541775	0.541775		0.09778	804.706	176.294	628.412	352.588	981	0.359417	0.845592
		0.03744	1117	416	701	832	1533	0.542727	0.542727		0.09777	805.283	176.717	628.566	353.434	982	0.359913	0.845765
		0.03735	1117	417	700	834	1534	0.543677	0.543098		0.09777	805.86	177.14	628.72	354.28	983	0.360407	0.845765
		0.0373	1117	418	699	836	1535	0.544625	0.543098		0.09777	806.437	177.563	628.874	355.126	984	0.3609	0.845765
		0.03728	1119	418	701	836	1537	0.543917	0.543098		0.09776	807.014	177.986	629.028	355.972	985	0.361393	0.845936
		0.03726	1120	418	702	836	1538	0.543563	0.543098		0.09741	807.591	178.409	629.182	356.818	986	0.361884	0.84602
		0.03709	1120	419	701	838	1539	0.544509	0.543098		0.09708	808.168	178.832	629.336	357.664	987	0.362375	0.846104
		0.03685	1121	419	702	838	1540	0.544156	0.543098		0.09706	808.745	179.255	629.49	358.51	988	0.362864	0.84623
		0.03669	1122	419	703	838	1541	0.543803	0.543098		0.09706	809.322	179.678	629.644	359.356	989	0.363353	0.84623
		0.03654	1123	419	704	838	1542	0.54345	0.543098		0.09678	809.899	180.101	629.797	360.203	990	0.363841	0.846354
		0.03643	1124	419	705	838	1543	0.543098	0.543098		0.09659	810.475	180.525	629.951	361.049	991	0.364328	0.846437
		0.03639	1124	420	704	840	1544	0.544041	0.543338		0.09638	811.052	180.948	630.104	361.896	992	0.364814	0.846519
		0.03637	1125	420	705	840	1545	0.543689	0.543338		0.09627	811.629	181.371	630.258	362.742	993	0.365299	0.8466
		0.03627	1126	420	706	840	1546	0.543338	0.543338		0.09622	812.206	181.794	630.411	363.589	994	0.365784	0.846682
		0.03618	1126	421	705	842	1547	0.544279	0.544279		0.09597	812.782	182.218	630.564	364.436	995	0.366267	0.846762
		0.03615	1127	422	705	844	1549	0.544868	0.544868		0.09573	813.359	182.641	630.718	365.282	996	0.366749	0.846843
		0.03608	1127	423	704	846	1550	0.545806	0.545806		0.09572	813.935	183.065	630.871	366.129	997	0.367231	0.846923
		0.03604	1127	424	703	848	1551	0.546744	0.546744		0.0957	814.512	183.488	631.024	366.976	998	0.367712	0.847002
		0.03598	1127	425	702	850	1552	0.54768	0.547085		0.09562	815.088	183.912	631.177	367.823	999	0.368192	0.847081
		0.03591	1128	425	703	850	1553	0.547328	0.547085		0.09549	815.665	184.335	631.329	368.671	1000	0.368671	0.84716
		0.03584	1128	426	702	852	1554	0.548263	0.547085		0.09548	816.241	184.759	631.482	369.518	1001	0.369149	0.847238
		0.03578	1129	426	703	852	1555	0.54791	0.547085		0.09516	816.817	185.183	631.635	370.365	1002	0.369626	0.847316
		0.03575	1130	427	703	854	1557	0.548491	0.547085		0.09509	817.394	185.606	631.787	371.213	1003	0.370102	0.847394
		0.03572	1131	427	704	854	1558	0.548139	0.547085		0.09507	817.97	186.03	631.94	372.06	1004	0.370578	0.847471
		0.03565	1132	427	705	854	1559	0.547787	0.547085		0.09471	818.546	186.454	632.092	372.908	1005	0.371052	0.847548
		0.03559	1133	427	706	854	1560	0.547436	0.547085		0.09448	819.122	186.878	632.245	373.755	1006	0.371526	0.847624
		0.03553	1134	427	707	854	1561	0.547085	0.547085		0.0944	819.699	187.301	632.397	374.603	1007	0.371999	0.847776
		0.0355	1134	428	706	856	1562	0.548015	0.548015		0.0944	820.275	187.725	632.549	375.451	1008	0.372471	0.847776
		0.03549	1134	429	705	858	1563	0.548944	0.548469		0.0944	820.851	188.149	632.701	376.299	1009	0.372942	0.847776
		0.03547	1135	429	706	858	1564	0.548593	0.548469		0.09427	821.427	188.573	632.854	377.146	1010	0.373412	0.847963
		0.03544	1135	430	705	860	1565	0.549521	0.548469		0.09427	822.003	188.997	633.006	377.994	1011	0.373882	0.847963
		0.03541	1136	430	706	860	1566	0.54917	0.548469		0.0942	822.579	189.421	633.157	378.843	1012	0.37435	0.848075
		0.03534	1137	430	707	860	1567	0.548819	0.548469		0.094	823.155	189.845	633.309	379.691	1013	0.374818	0.848149
		0.03523	1138	430	708	860	1568	0.548469	0.548469		0.09388	823.731	190.269	633.461	380.539	1014	0.375285	0.848222
		0.03514	1138	431	707	862	1569	0.549395	0.549045		0.09362	824.306	190.694	633.613	381.387	1015	0.375751	0.848296
		0.03511	1139	431	708	862	1570	0.549045	0.549045		0.0933	824.882	191.118	633.764	382.236	1016	0.376216	0.848368
		0.035	1139	432	707	864	1571	0.549968	0.549968		0.09306	825.458	191.542	633.916	383.084	1017	0.37668	0.848441
		0.03492	1139	433	706	866	1572	0.550891	0.55054		0.09304	826.034	191.966	634.067	383.933	1018	0.377144	0.848513
		0.03489	1140	433	707	866	1573	0.55054	0.55054		0.09284	826.609	192.391	634.219	384.781	1019	0.377607	0.848585
		0.03483	1140	434	706	868	1574	0.551461	0.550943		0.09274	827.185	192.815	634.37	385.63	1020	0.378068	0.848657
		0.03478	1140	435	705	870	1575	0.552381	0.550943		0.09265	827.761	193.239	634.522	386.478	1021	0.378529	0.848728
		0.03472	1141	435	706	870	1576	0.55203	0.550943		0.09257	828.336	193.664	634.673	387.327	1022	0.37899	0.848799
		0.0347	1142	435	707	870	1577	0.55168	0.550943		0.09247	828.912	194.088	634.824	388.176	1023	0.379449	0.848869
		0.03466	1142	437	705	874	1579	0.553515	0.550943		0.09228	829.487	194.513	634.975	389.025	1024	0.379907	0.84894
		0.03464	1143	437	706	874	1580	0.553165	0.550943		0.09223	830.063	194.937	635.126	389.874	1025	0.380365	0.849009
		0.03456	1143	438	705	876	1581	0.55408	0.550943		0.09221	830.638	195.362	635.277	390.723	1026	0.380822	0.849079
		0.03443	1147	438	709	876	1585	0.552681	0.550943		0.0922	831.214	195.786	635.428	391.572	1027	0.381278	0.849148
		0.0344	1148	438	710	876	1586	0.552333	0.550943		0.0921	831.789	196.211	635.578	392.422	1028	0.381733	0.849218
		0.03436	1149	438	711	876	1587	0.551985	0.550943		0.09195	832.365	196.635	635.729	393.271	1029	0.382187	0.849286
		0.0343	1150	438	712	876	1588	0.551637	0.550943		0.09192	832.94	197.06	635.88	394.12	1030	0.382641	0.849355
		0.03425	1151	438	713	876	1589	0.55129	0.550943		0.09179	833.515	197.485	636.03	394.97	1031	0.383094	0.849423
		0.03417	1152	438	714	876	1590	0.550943	0.550943		0.09167	834.09	197.91	636.181	395.819	1032	0.383546	0.849491
		0.03409	1152	439	713	878	1591	0.551854	0.551508		0.09164	834.666	198.334	636.331	396.669	1033	0.383997	0.849592
		0.03405	1153	439	714	878	1592	0.551508	0.551508		0.09164	835.241	198.759	636.482	397.518	1034	0.384447	0.849592
		0.03395	1153	440	713	880	1593	0.552417	0.552417		0.09162	835.816	199.184	636.632	398.368	1035	0.384897	0.849693
		0.0339	1153	441	712	882	1594	0.553325	0.552978		0.0914	836.391	199.609	636.782	399.218	1036	0.385345	0.849759
		0.03382	1154	441	713	882	1595	0.552978	0.552978		0.09137	836.966	200.034	636.932	400.068	1037	0.385793	0.849826
		0.03381	1154	443	711	886	1597	0.55479	0.554307		0.09119	837.541	200.459	637.083	400.917	1038	0.38624	0.849892
		0.0337	1154	444	710	888	1598	0.555695	0.554307		0.09115	838.116	200.884	637.233	401.767	1039	0.386687	0.849958
		0.03355	1155	444	711	888	1599	0.555347	0.554307		0.09101	838.691	201.309	637.383	402.617	1040	0.387132	0.850056
		0.03341	1156	444	712	888	1600	0.555	0.554307		0.09101	839.266	201.734	637.532	403.468	1041	0.387577	0.850056
		0.03328	1157	444	713	888	1601	0.554653	0.554307		0.09085	839.841	202.159	637.682	404.318	1042	0.388021	0.850154
		0.03321	1158	444	714	888	1602	0.554307	0.554307		0.09064	840.416	202.584	637.832	405.168	1043	0.388464	0.850219
		0.03302	1158	445	713	890	1603	0.555209	0.554863		0.09048	840.991	203.009	637.982	406.018	1044	0.388906	0.850283
		0.03278	1159	445	714	890	1604	0.554863	0.554863		0.09012	841.566	203.434	638.131	406.869	1045	0.389348	0.850348
		0.0325	1159	446	713	892	1605	0.555763	0.555417		0.08994	842.141	203.859	638.281	407.719	1046	0.389789	0.850412
		0.03214	1160	446	714	892	1606	0.555417	0.555417		0.08978	842.715	204.285	638.431	408.569	1047	0.390229	0.850475
		0.03211	1160	448	712	896	1608	0.557214	0.556868		0.0897	843.29	204.71	638.58	409.42	1048	0.390668	0.850539
		0.03174	1161	448	713	896	1609	0.556868	0.556868		0.08967	843.865	205.135	638.729	410.271	1049	0.391106	0.850602
		0.03151	1161	449	712	898	1610	0.557764	0.557764		0.0895	844.439	205.561	638.879	411.121	1050	0.391544	0.850697
		0.0313	1161	451	710	902	1612	0.559553	0.55886		0.0895	845.014	205.986	639.028	411.972	1051	0.391981	0.850697
		0.03124	1162	451	711	902	1613	0.559206	0.55886		0.08924	845.589	206.411	639.177	412.823	1052	0.392417	0.850822
		0.031	1163	451	712	902	1614	0.55886	0.55886		0.08924	846.163	206.837	639.326	413.674	1053	0.392852	0.850822
		0.03088	1163	452	711	904	1615	0.559752	0.559752		0.08906	846.738	207.262	639.475	414.525	1054	0.393287	0.850915
		0.03064	1164	453	711	906	1617	0.560297	0.559951		0.08889	847.312	207.688	639.625	415.375	1055	0.393721	0.851008
		0.03028	1165	453	712	906	1618	0.559951	0.559951		0.08889	847.887	208.113	639.773	416.227	1056	0.394154	0.851008
		0.02982	1165	454	711	908	1619	0.56084	0.560494		0.08879	848.461	208.539	639.922	417.078	1057	0.394586	0.8511
		0.02967	1166	454	712	908	1620	0.560494	0.560494		0.08873	849.036	208.964	640.071	417.929	1058	0.395018	0.851161
		0.02962	1166	455	711	910	1621	0.561382	0.561036		0.08854	849.61	209.39	640.22	418.78	1059	0.395449	0.851222
		0.02959	1167	455	712	910	1622	0.561036	0.561036		0.08837	850.184	209.816	640.369	419.631	1060	0.395879	0.851282
		0.02914	1167	456	711	912	1623	0.561922	0.561576		0.08811	850.759	210.241	640.517	420.483	1061	0.396308	0.851343
		0.02905	1168	456	712	912	1624	0.561576	0.561576		0.08802	851.333	210.667	640.666	421.334	1062	0.396736	0.851523
		0.02899	1168	457	711	914	1625	0.562462	0.561619		0.08802	851.907	211.093	640.815	422.185	1063	0.397164	0.851523
		0.02881	1169	458	711	916	1627	0.562999	0.561619		0.08802	852.481	211.519	640.963	423.037	1064	0.397591	0.851523
		0.02837	1170	458	712	916	1628	0.562654	0.561619		0.08802	853.056	211.944	641.111	423.889	1065	0.398017	0.851523
		0.02826	1171	458	713	916	1629	0.562308	0.561619		0.08802	853.63	212.37	641.26	424.74	1066	0.398443	0.851523
		0.02784	1172	458	714	916	1630	0.561963	0.561619		0.08795	854.204	212.796	641.408	425.592	1067	0.398868	0.851701
		0.02783	1173	458	715	916	1631	0.561619	0.561619		0.08793	854.778	213.222	641.556	426.444	1068	0.399292	0.85176
		0.02776	1173	459	714	918	1632	0.5625	0.5625		0.08776	855.352	213.648	641.704	427.296	1069	0.399715	0.851818
		0.02775	1173	460	713	920	1633	0.56338	0.562882		0.08769	855.926	214.074	641.853	428.147	1070	0.400138	0.851877
		0.02773	1174	460	714	920	1634	0.563035	0.562882		0.08752	856.5	214.5	642.001	428.999	1071	0.40056	0.851935
		0.02742	1174	461	713	922	1635	0.563914	0.562882		0.08749	857.074	214.926	642.149	429.851	1072	0.400981	0.851993
		0.02721	1175	461	714	922	1636	0.56357	0.562882		0.08732	857.648	215.352	642.297	430.703	1073	0.401401	0.852051
		0.02713	1176	461	715	922	1637	0.563225	0.562882		0.08716	858.222	215.778	642.445	431.555	1074	0.401821	0.852108
		0.02661	1177	461	716	922	1638	0.562882	0.562882		0.08715	858.796	216.204	642.592	432.408	1075	0.40224	0.852166
		0.02651	1177	462	715	924	1639	0.563758	0.563415		0.08697	859.37	216.63	642.74	433.26	1076	0.402658	0.852252
		0.02636	1178	462	716	924	1640	0.563415	0.563415		0.08697	859.944	217.056	642.888	434.112	1077	0.403075	0.852252
		0.02631	1178	464	714	928	1642	0.565164	0.565164		0.08663	860.518	217.482	643.036	434.964	1078	0.403492	0.852394
		0.02602	1178	465	713	930	1643	0.566038	0.566038		0.08663	861.092	217.908	643.183	435.817	1079	0.403908	0.852394
		0.02583	1178	466	712	932	1644	0.56691	0.56691		0.08663	861.665	218.335	643.331	436.669	1080	0.404323	0.852394
		0.02564	1178	467	711	934	1645	0.567781	0.567092		0.08634	862.239	218.761	643.478	437.522	1081	0.404738	0.852506
		0.02528	1179	467	712	934	1646	0.567436	0.567092		0.08618	862.813	219.187	643.626	438.374	1082	0.405152	0.852562
		0.02493	1180	467	713	934	1647	0.567092	0.567092		0.08615	863.386	219.614	643.773	439.227	1083	0.405565	0.852618
		0.02466	1180	468	712	936	1648	0.567961	0.567961		0.08611	863.96	220.04	643.92	440.08	1084	0.405978	0.852674
		0.02406	1180	469	711	938	1649	0.56883	0.568319		0.08596	864.534	220.466	644.068	440.932	1085	0.406389	0.852729
		0.02358	1181	469	712	938	1650	0.568485	0.568319		0.08585	865.107	220.893	644.215	441.785	1086	0.4068	0.85284
		0.02349	1181	470	711	940	1651	0.569352	0.568319		0.08585	865.681	221.319	644.362	442.638	1087	0.407211	0.85284
		0.02344	1182	470	712	940	1652	0.569007	0.568319		0.08585	866.255	221.745	644.509	443.491	1088	0.40762	0.85284
		0.02305	1183	470	713	940	1653	0.568663	0.568319		0.08569	866.828	222.172	644.656	444.344	1089	0.408029	0.852949
		0.02283	1184	470	714	940	1654	0.568319	0.568319		0.0856	867.402	222.598	644.803	445.197	1090	0.408438	0.853004
		0.02235	1184	471	713	942	1655	0.569184	0.568841		0.08533	867.975	223.025	644.95	446.05	1091	0.408845	0.853139
		0.02222	1185	471	714	942	1656	0.568841	0.568841		0.08533	868.548	223.452	645.097	446.903	1092	0.409252	0.853139
		0.02161	1185	472	713	944	1657	0.569704	0.569704		0.08533	869.122	223.878	645.244	447.756	1093	0.409658	0.853139
		0.02146	1185	473	712	946	1658	0.570567	0.570406		0.08533	869.695	224.305	645.391	448.609	1094	0.410063	0.853139
		0.02127	1185	474	711	948	1659	0.571429	0.570406		0.08524	870.269	224.731	645.537	449.463	1095	0.410468	0.853274
		0.02123	1186	474	712	948	1660	0.571084	0.570406		0.08502	870.842	225.158	645.684	450.316	1096	0.410872	0.853327
		0.02039	1186	475	711	950	1661	0.571945	0.570406		0.085	871.415	225.585	645.831	451.169	1097	0.411276	0.853381
		0.01979	1187	475	712	950	1662	0.5716	0.570406		0.08489	871.989	226.011	645.977	452.023	1098	0.411678	0.853434
		0.01959	1188	475	713	950	1663	0.571257	0.570406		0.08481	872.562	226.438	646.124	452.876	1099	0.41208	0.853487
		0.01918	1189	475	714	950	1664	0.570913	0.570406		0.08479	873.135	226.865	646.27	453.73	1100	0.412482	0.853566
		0.01805	1189	476	713	952	1665	0.571772	0.570406		0.08479	873.708	227.292	646.417	454.583	1101	0.412882	0.853566
		0.018	1190	476	714	952	1666	0.571429	0.570406		0.08472	874.281	227.719	646.563	455.437	1102	0.413282	0.853671
		0.01797	1190	477	713	954	1667	0.572286	0.570406		0.08472	874.855	228.145	646.709	456.291	1103	0.413682	0.853671
		0.01737	1191	477	714	954	1668	0.571942	0.570406		0.08455	875.428	228.572	646.855	457.145	1104	0.41408	0.853749
		0.01677	1191	478	713	956	1669	0.572798	0.570406		0.08429	876.001	228.999	647.002	457.998	1105	0.414478	0.853879
		0.01649	1192	478	714	956	1670	0.572455	0.570406		0.08429	876.574	229.426	647.148	458.852	1106	0.414875	0.853879
		0.01617	1194	478	716	956	1672	0.57177	0.570406		0.08429	877.147	229.853	647.294	459.706	1107	0.415272	0.853879
		0.01594	1195	478	717	956	1673	0.571429	0.570406		0.08429	877.72	230.28	647.44	460.56	1108	0.415668	0.853879
		0.01556	1196	478	718	956	1674	0.571087	0.570406		0.08422	878.293	230.707	647.586	461.414	1109	0.416063	0.854007
		0.01519	1197	478	719	956	1675	0.570746	0.570406		0.08403	878.866	231.134	647.732	462.268	1110	0.416458	0.854058
		0.01506	1198	478	720	956	1676	0.570406	0.570406		0.08386	879.439	231.561	647.878	463.122	1111	0.416852	0.854109
		0.01496	1198	479	719	958	1677	0.571258	0.570918		0.08377	880.012	231.988	648.024	463.976	1112	0.417245	0.85416
		0.01456	1199	479	720	958	1678	0.570918	0.570918		0.08375	880.585	232.415	648.169	464.831	1113	0.417638	0.854211
		0.01415	1199	480	719	960	1679	0.571769	0.571429		0.08352	881.158	232.842	648.315	465.685	1114	0.41803	0.854261
		0.01282	1200	480	720	960	1680	0.571429	0.571429		0.08347	881.73	233.27	648.461	466.539	1115	0.418421	0.854312
		0.01222	1200	481	719	962	1681	0.572278	0.572104		0.08334	882.303	233.697	648.606	467.394	1116	0.418811	0.854362
		0.01207	1200	482	718	964	1682	0.573127	0.572104		0.08326	882.876	234.124	648.752	468.248	1117	0.419201	0.854412
		0.01197	1201	482	719	964	1683	0.572787	0.572104		0.08317	883.449	234.551	648.898	469.102	1118	0.419591	0.854462
		0.01184	1202	482	720	964	1684	0.572447	0.572104		0.083	884.022	234.978	649.043	469.957	1119	0.419979	0.854512
		0.0081	1202	483	719	966	1685	0.573294	0.572104		0.08296	884.594	235.406	649.188	470.812	1120	0.420367	0.854561
		0.00765	1203	483	720	966	1686	0.572954	0.572104		0.08281	885.167	235.833	649.334	471.666	1121	0.420755	0.854611
		0.006968	1203	484	719	968	1687	0.5738	0.572104		0.08274	885.74	236.26	649.479	472.521	1122	0.421142	0.854684
		0.004916	1206	484	722	968	1690	0.572781	0.572104		0.08274	886.312	236.688	649.625	473.375	1123	0.421528	0.854684
		0.00115	1208	484	724	968	1692	0.572104	0.572104		0.08266	886.885	237.115	649.77	474.23	1124	0.421913	0.854758
											0.08248	887.457	237.543	649.915	475.085	1125	0.422298	0.854807
											0.08246	888.03	237.97	650.06	475.94	1126	0.422682	0.85488
											0.08246	888.603	238.397	650.205	476.795	1127	0.423065	0.85488
											0.08223	889.175	238.825	650.35	477.65	1128	0.423448	0.854953
											0.08205	889.748	239.252	650.495	478.505	1129	0.423831	0.855025
											0.08205	890.32	239.68	650.64	479.36	1130	0.424212	0.855025
											0.08194	890.893	240.107	650.785	480.215	1131	0.424593	0.855097
											0.08188	891.465	240.535	650.93	481.07	1132	0.424974	0.855145
											0.08162	892.037	240.963	651.075	481.925	1133	0.425353	0.855193
											0.08153	892.61	241.39	651.22	482.78	1134	0.425732	0.85524
											0.0814	893.182	241.818	651.364	483.636	1135	0.426111	0.855288
											0.08132	893.754	242.246	651.509	484.491	1136	0.426489	0.855335
											0.08128	894.327	242.673	651.654	485.346	1137	0.426866	0.855382
											0.08111	894.899	243.101	651.798	486.202	1138	0.427242	0.855429
											0.08099	895.471	243.529	651.943	487.057	1139	0.427618	0.855476
											0.08097	896.044	243.956	652.087	487.913	1140	0.427994	0.855523
											0.08086	896.616	244.384	652.232	488.768	1141	0.428369	0.855593
											0.08086	897.188	244.812	652.376	489.624	1142	0.428743	0.855593
											0.08068	897.76	245.24	652.52	490.48	1143	0.429116	0.855732
											0.08068	898.332	245.668	652.665	491.335	1144	0.429489	0.855732
											0.08068	898.904	246.096	652.809	492.191	1145	0.429861	0.855732
											0.08068	899.476	246.524	652.953	493.047	1146	0.430233	0.855732
											0.08061	900.049	246.951	653.097	493.903	1147	0.430604	0.85587
											0.08061	900.621	247.379	653.241	494.759	1148	0.430975	0.85587
											0.08023	901.193	247.807	653.385	495.615	1149	0.431344	0.855938
											0.08008	901.765	248.235	653.529	496.471	1150	0.431714	0.856052
											0.08008	902.337	248.663	653.673	497.327	1151	0.432082	0.856052
											0.08008	902.909	249.091	653.817	498.183	1152	0.43245	0.856052
											0.08008	903.481	249.519	653.961	499.039	1153	0.432818	0.856052
											0.07995	904.052	249.948	654.105	499.895	1154	0.433185	0.856164
											0.07975	904.624	250.376	654.249	500.751	1155	0.433551	0.856209
											0.07973	905.196	250.804	654.392	501.608	1156	0.433917	0.856254
											0.07965	905.768	251.232	654.536	502.464	1157	0.434282	0.856321
											0.07965	906.34	251.66	654.68	503.32	1158	0.434646	0.856321
											0.07939	906.912	252.088	654.823	504.177	1159	0.43501	0.856387
											0.07922	907.483	252.517	654.967	505.033	1160	0.435373	0.856432
											0.0792	908.055	252.945	655.111	505.889	1161	0.435736	0.856476
											0.07905	908.627	253.373	655.254	506.746	1162	0.436098	0.856542
											0.07905	909.199	253.801	655.397	507.603	1163	0.43646	0.856542
											0.07888	909.77	254.23	655.541	508.459	1164	0.436821	0.856607
											0.07883	910.342	254.658	655.684	509.316	1165	0.437181	0.856651
											0.07873	910.914	255.086	655.827	510.173	1166	0.437541	0.856695
											0.07859	911.485	255.515	655.971	511.029	1167	0.4379	0.856781
											0.07859	912.057	255.943	656.114	511.886	1168	0.438259	0.856781
											0.07859	912.629	256.371	656.257	512.743	1169	0.438617	0.856781
											0.07839	913.2	256.8	656.4	513.6	1170	0.438974	0.856868
											0.07835	913.772	257.228	656.543	514.457	1171	0.439331	0.856911
											0.07833	914.343	257.657	656.686	515.314	1172	0.439687	0.856953
											0.07819	914.915	258.085	656.829	516.171	1173	0.440043	0.856996
											0.07818	915.486	258.514	656.972	517.028	1174	0.440398	0.857039
											0.07802	916.058	258.942	657.115	517.885	1175	0.440753	0.857081
											0.07797	916.629	259.371	657.258	518.742	1176	0.441107	0.857124
											0.07785	917.2	259.8	657.401	519.599	1177	0.44146	0.857166
											0.0778	917.772	260.228	657.544	520.456	1178	0.441813	0.857208
											0.07776	918.343	260.657	657.687	521.313	1179	0.442166	0.85725
											0.07756	918.915	261.085	657.829	522.171	1180	0.442518	0.857292
											0.0775	919.486	261.514	657.972	523.028	1181	0.442869	0.857334
											0.07747	920.057	261.943	658.115	523.885	1182	0.44322	0.857376
											0.07737	920.629	262.371	658.257	524.743	1183	0.44357	0.857438
											0.07737	921.2	262.8	658.4	525.6	1184	0.443919	0.857438
											0.07733	921.771	263.229	658.542	526.458	1185	0.444268	0.857501
											0.07717	922.342	263.658	658.685	527.315	1186	0.444617	0.857542
											0.07716	922.914	264.086	658.827	528.173	1187	0.444965	0.857583
											0.07699	923.485	264.515	658.969	529.031	1188	0.445312	0.857624
											0.07697	924.056	264.944	659.112	529.888	1189	0.445659	0.857665
											0.0769	924.627	265.373	659.254	530.746	1190	0.446005	0.857706
											0.07678	925.198	265.802	659.396	531.604	1191	0.446351	0.857747
											0.07665	925.769	266.231	659.539	532.461	1192	0.446696	0.857788
											0.07658	926.34	266.66	659.681	533.319	1193	0.447041	0.857828
											0.07651	926.911	267.089	659.823	534.177	1194	0.447385	0.857869
											0.07648	927.482	267.518	659.965	535.035	1195	0.447728	0.857909
											0.07641	928.053	267.947	660.107	535.893	1196	0.448071	0.85795
											0.07623	928.624	268.376	660.249	536.751	1197	0.448414	0.85799
											0.07613	929.195	268.805	660.391	537.609	1198	0.448755	0.85803
											0.07605	929.766	269.234	660.533	538.467	1199	0.449097	0.85807
											0.0757	930.337	269.663	660.675	539.325	1200	0.449438	0.85811
											0.07553	930.908	270.092	660.817	540.183	1201	0.449778	0.85815
											0.07542	931.479	270.521	660.958	541.042	1202	0.450118	0.858189
											0.07536	932.05	270.95	661.1	541.9	1203	0.450457	0.858229
											0.07528	932.621	271.379	661.242	542.758	1204	0.450796	0.858268
											0.07519	933.192	271.808	661.384	543.616	1205	0.451134	0.858308
											0.07504	933.763	272.237	661.525	544.475	1206	0.451472	0.858367
											0.07504	934.333	272.667	661.667	545.333	1207	0.451809	0.858367
											0.07502	934.904	273.096	661.808	546.192	1208	0.452145	0.858464
											0.07502	935.475	273.525	661.95	547.05	1209	0.452481	0.858464
											0.07502	936.046	273.954	662.091	547.909	1210	0.452817	0.858464
											0.07501	936.616	274.384	662.233	548.767	1211	0.453152	0.858542
											0.07486	937.187	274.813	662.374	549.626	1212	0.453487	0.858581
											0.07476	937.758	275.242	662.516	550.484	1213	0.453821	0.858619
											0.0747	938.329	275.671	662.657	551.343	1214	0.454154	0.858658
											0.07454	938.899	276.101	662.798	552.202	1215	0.454487	0.858696
											0.07442	939.47	276.53	662.94	553.06	1216	0.454819	0.858773
											0.07442	940.04	276.96	663.081	553.919	1217	0.455151	0.858773
											0.07442	940.611	277.389	663.222	554.778	1218	0.455483	0.858773
											0.07438	941.182	277.818	663.363	555.637	1219	0.455814	0.858849
											0.07423	941.752	278.248	663.504	556.496	1220	0.456144	0.858887
											0.07399	942.323	278.677	663.645	557.355	1221	0.456474	0.858944
											0.07399	942.893	279.107	663.786	558.214	1222	0.456803	0.858944
											0.07378	943.464	279.536	663.927	559.073	1223	0.457132	0.859001
											0.07374	944.034	279.966	664.068	559.932	1224	0.45746	0.859038
											0.07363	944.605	280.395	664.209	560.791	1225	0.457788	0.859076
											0.07356	945.175	280.825	664.35	561.65	1226	0.458116	0.859113
											0.07353	945.746	281.254	664.491	562.509	1227	0.458442	0.859151
											0.07347	946.316	281.684	664.632	563.368	1228	0.458769	0.859188
											0.07342	946.886	282.114	664.773	564.227	1229	0.459095	0.859225
											0.07341	947.457	282.543	664.913	565.087	1230	0.45942	0.859281
											0.07341	948.027	282.973	665.054	565.946	1231	0.459745	0.859281
											0.07331	948.597	283.403	665.195	566.805	1232	0.460069	0.859355
											0.07331	949.168	283.832	665.335	567.665	1233	0.460393	0.859355
											0.0732	949.738	284.262	665.476	568.524	1234	0.460716	0.85941
											0.07306	950.308	284.692	665.617	569.383	1235	0.461039	0.859446
											0.07305	950.879	285.121	665.757	570.243	1236	0.461362	0.859483
											0.07298	951.449	285.551	665.898	571.102	1237	0.461683	0.859519
											0.07288	952.019	285.981	666.038	571.962	1238	0.462005	0.859574
											0.07288	952.589	286.411	666.178	572.822	1239	0.462326	0.859574
											0.07278	953.159	286.841	666.319	573.681	1240	0.462646	0.859628
											0.07274	953.73	287.27	666.459	574.541	1241	0.462966	0.859665
											0.07271	954.3	287.7	666.599	575.401	1242	0.463286	0.859701
											0.07265	954.87	288.13	666.74	576.26	1243	0.463604	0.859737
											0.07264	955.44	288.56	666.88	577.12	1244	0.463923	0.859772
											0.07254	956.01	288.99	667.02	577.98	1245	0.464241	0.859808
											0.07251	956.58	289.42	667.16	578.84	1246	0.464558	0.859844
											0.07241	957.15	289.85	667.3	579.7	1247	0.464875	0.85988
											0.07237	957.72	290.28	667.44	580.56	1248	0.465192	0.859915
											0.07224	958.29	290.71	667.58	581.42	1249	0.465508	0.859951
											0.07211	958.86	291.14	667.72	582.28	1250	0.465824	0.860004
											0.07211	959.43	291.57	667.86	583.14	1251	0.466139	0.860004
											0.07202	960	292	668	584	1252	0.466453	0.860057
											0.07198	960.57	292.43	668.14	584.86	1253	0.466768	0.860092
											0.07185	961.14	292.86	668.28	585.72	1254	0.467081	0.860127
											0.07174	961.71	293.29	668.42	586.58	1255	0.467394	0.860162
											0.07172	962.28	293.72	668.56	587.44	1256	0.467707	0.860197
											0.0716	962.85	294.15	668.7	588.3	1257	0.468019	0.860232
											0.07147	963.42	294.58	668.839	589.161	1258	0.468331	0.860266
											0.07123	963.99	295.01	668.979	590.021	1259	0.468643	0.860301
											0.07122	964.559	295.441	669.119	590.881	1260	0.468953	0.860336
											0.07087	965.129	295.871	669.258	591.742	1261	0.469264	0.860405
											0.07087	965.699	296.301	669.398	592.602	1262	0.469574	0.860405
											0.07087	966.269	296.731	669.537	593.463	1263	0.469883	0.860405
											0.07076	966.839	297.161	669.677	594.323	1264	0.470192	0.860473
											0.07057	967.408	297.592	669.816	595.184	1265	0.470501	0.860524
											0.07057	967.978	298.022	669.956	596.044	1266	0.470809	0.860524
											0.07053	968.548	298.452	670.095	596.905	1267	0.471117	0.860576
											0.0704	969.117	298.883	670.235	597.765	1268	0.471424	0.86061
											0.07029	969.687	299.313	670.374	598.626	1269	0.47173	0.860643
											0.07024	970.257	299.743	670.513	599.487	1270	0.472037	0.860677
											0.07017	970.826	300.174	670.653	600.347	1271	0.472342	0.860711
											0.07011	971.396	300.604	670.792	601.208	1272	0.472648	0.860745
											0.07006	971.966	301.034	670.931	602.069	1273	0.472953	0.860778
											0.06995	972.535	301.465	671.07	602.93	1274	0.473257	0.860812
											0.06973	973.105	301.895	671.21	603.79	1275	0.473561	0.860862
											0.06973	973.674	302.326	671.349	604.651	1276	0.473865	0.860862
											0.06967	974.244	302.756	671.488	605.512	1277	0.474168	0.860912
											0.06951	974.813	303.187	671.627	606.373	1278	0.47447	0.860962
											0.06951	975.383	303.617	671.766	607.234	1279	0.474773	0.860962
											0.0694	975.952	304.048	671.905	608.095	1280	0.475074	0.861011
											0.06939	976.522	304.478	672.044	608.956	1281	0.475376	0.861044
											0.06913	977.091	304.909	672.183	609.817	1282	0.475677	0.861077
											0.06888	977.661	305.339	672.322	610.678	1283	0.475977	0.86111
											0.06873	978.23	305.77	672.46	611.54	1284	0.476277	0.861159
											0.06873	978.8	306.2	672.599	612.401	1285	0.476576	0.861159
											0.06868	979.369	306.631	672.738	613.262	1286	0.476876	0.861208
											0.06858	979.938	307.062	672.877	614.123	1287	0.477174	0.861257
											0.06858	980.508	307.492	673.016	614.984	1288	0.477472	0.861257
											0.06857	981.077	307.923	673.154	615.846	1289	0.47777	0.861322
											0.06857	981.646	308.354	673.293	616.707	1290	0.478068	0.861322
											0.06847	982.216	308.784	673.432	617.568	1291	0.478364	0.86137
											0.06832	982.785	309.215	673.57	618.43	1292	0.478661	0.861419
											0.06832	983.354	309.646	673.709	619.291	1293	0.478957	0.861419
											0.06824	983.924	310.076	673.847	620.153	1294	0.479253	0.861467
											0.06801	984.493	310.507	673.986	621.014	1295	0.479548	0.861499
											0.06773	985.062	310.938	674.124	621.876	1296	0.479842	0.861562
											0.06773	985.631	311.369	674.263	622.737	1297	0.480137	0.861562
											0.06773	986.201	311.799	674.401	623.599	1298	0.480431	0.861562
											0.06715	986.77	312.23	674.539	624.461	1299	0.480724	0.861626
											0.06687	987.339	312.661	674.678	625.322	1300	0.481017	0.861658
											0.06651	987.908	313.092	674.816	626.184	1301	0.48131	0.861689
											0.06645	988.477	313.523	674.954	627.046	1302	0.481602	0.861721
											0.0662	989.046	313.954	675.093	627.907	1303	0.481894	0.861752
											0.06618	989.615	314.385	675.231	628.769	1304	0.482185	0.861784
											0.06579	990.185	314.815	675.369	629.631	1305	0.482476	0.861815
											0.06571	990.754	315.246	675.507	630.493	1306	0.482766	0.861846
											0.06551	991.323	315.677	675.645	631.355	1307	0.483056	0.861877
											0.06523	991.892	316.108	675.783	632.217	1308	0.483346	0.861908
											0.06494	992.461	316.539	675.921	633.079	1309	0.483635	0.861955
											0.06494	993.03	316.97	676.059	633.941	1310	0.483924	0.861955
											0.06493	993.599	317.401	676.197	634.803	1311	0.484212	0.862001
											0.06485	994.168	317.832	676.335	635.665	1312	0.4845	0.862032
											0.06451	994.737	318.263	676.473	636.527	1313	0.484788	0.862063
											0.0643	995.306	318.694	676.611	637.389	1314	0.485075	0.862094
											0.0642	995.875	319.125	676.749	638.251	1315	0.485362	0.862124
											0.06407	996.444	319.556	676.887	639.113	1316	0.485648	0.862155
											0.06388	997.012	319.988	677.025	639.975	1317	0.485934	0.862185
											0.06356	997.581	320.419	677.163	640.837	1318	0.48622	0.862216
											0.06335	998.15	320.85	677.3	641.7	1319	0.486505	0.862261
											0.06335	998.719	321.281	677.438	642.562	1320	0.486789	0.862261
											0.06329	999.288	321.712	677.576	643.424	1321	0.487074	0.862307
											0.06292	999.857	322.143	677.713	644.287	1322	0.487357	0.862337
											0.06248	1000.43	322.574	677.851	645.149	1323	0.487641	0.862367
											0.06216	1000.99	323.006	677.989	646.011	1324	0.487924	0.862412
											0.06216	1001.56	323.437	678.126	646.874	1325	0.488207	0.862412
											0.06214	1002.13	323.868	678.264	647.736	1326	0.488489	0.862457
											0.06213	1002.7	324.299	678.401	648.599	1327	0.488771	0.862487
											0.0617	1003.27	324.731	678.539	649.461	1328	0.489052	0.862517
											0.06139	1003.84	325.162	678.676	650.324	1329	0.489333	0.862546
											0.06102	1004.41	325.593	678.814	651.186	1330	0.489614	0.862576
											0.06091	1004.98	326.024	678.951	652.049	1331	0.489894	0.862606
											0.06089	1005.54	326.456	679.088	652.912	1332	0.490174	0.862635
											0.06049	1006.11	326.887	679.226	653.774	1333	0.490453	0.862694
											0.06049	1006.68	327.318	679.363	654.637	1334	0.490732	0.862694
											0.06049	1007.25	327.75	679.5	655.5	1335	0.491011	0.862694
											0.0604	1007.82	328.181	679.638	656.362	1336	0.491289	0.862753
											0.06017	1008.39	328.613	679.775	657.225	1337	0.491567	0.862782
											0.05995	1008.96	329.044	679.912	658.088	1338	0.491845	0.862811
											0.05972	1009.52	329.475	680.049	658.951	1339	0.492122	0.86284
											0.05932	1010.09	329.907	680.186	659.814	1340	0.492398	0.862869
											0.05892	1010.66	330.338	680.323	660.677	1341	0.492675	0.862898
											0.0584	1011.23	330.77	680.46	661.54	1342	0.49295	0.862927
											0.05823	1011.8	331.201	680.598	662.402	1343	0.493226	0.862956
											0.05818	1012.37	331.633	680.735	663.265	1344	0.493501	0.862985
											0.0581	1012.94	332.064	680.872	664.128	1345	0.493776	0.863014
											0.05802	1013.5	332.496	681.008	664.992	1346	0.49405	0.863042
											0.05792	1014.07	332.927	681.145	665.855	1347	0.494324	0.863071
											0.05763	1014.64	333.359	681.282	666.718	1348	0.494598	0.8631
											0.05745	1015.21	333.79	681.419	667.581	1349	0.494871	0.863128
											0.05707	1015.78	334.222	681.556	668.444	1350	0.495144	0.863157
											0.05696	1016.35	334.654	681.693	669.307	1351	0.495416	0.863199
											0.05696	1016.91	335.085	681.83	670.17	1352	0.495688	0.863199
											0.05683	1017.48	335.517	681.966	671.034	1353	0.49596	0.86327
											0.05683	1018.05	335.948	682.103	671.897	1354	0.496231	0.86327
											0.05683	1018.62	336.38	682.24	672.76	1355	0.496502	0.86327
											0.05671	1019.19	336.812	682.376	673.624	1356	0.496773	0.863326
											0.05659	1019.76	337.243	682.513	674.487	1357	0.497043	0.863354
											0.05658	1020.32	337.675	682.65	675.35	1358	0.497312	0.863382
											0.05626	1020.89	338.107	682.786	676.214	1359	0.497582	0.863424
											0.05626	1021.46	338.539	682.923	677.077	1360	0.497851	0.863424
											0.05606	1022.03	338.97	683.059	677.941	1361	0.498119	0.86348
											0.05606	1022.6	339.402	683.196	678.804	1362	0.498388	0.86348
											0.05603	1023.17	339.834	683.332	679.668	1363	0.498656	0.863521
											0.05602	1023.73	340.266	683.469	680.531	1364	0.498923	0.863549
											0.05546	1024.3	340.697	683.605	681.395	1365	0.49919	0.863576
											0.05511	1024.87	341.129	683.742	682.258	1366	0.499457	0.863604
											0.05494	1025.44	341.561	683.878	683.122	1367	0.499723	0.863631
											0.05489	1026.01	341.993	684.014	683.986	1368	0.499989	0.863659
											0.05443	1026.58	342.425	684.151	684.849	1369	0.500255	0.863686
											0.05423	1027.14	342.857	684.287	685.713	1370	0.50052	0.863714
											0.05401	1027.71	343.288	684.423	686.577	1371	0.500785	0.863741
											0.05381	1028.28	343.72	684.559	687.441	1372	0.50105	0.863768
											0.05353	1028.85	344.152	684.696	688.304	1373	0.501314	0.863795
											0.0535	1029.42	344.584	684.832	689.168	1374	0.501578	0.863822
											0.05347	1029.98	345.016	684.968	690.032	1375	0.501841	0.863849
											0.05341	1030.55	345.448	685.104	690.896	1376	0.502105	0.863876
											0.05336	1031.12	345.88	685.24	691.76	1377	0.502367	0.863903
											0.05243	1031.69	346.312	685.376	692.624	1378	0.50263	0.863943
											0.05243	1032.26	346.744	685.512	693.488	1379	0.502892	0.863943
											0.0522	1032.5	347.5	685	695	1380	0.503623	1
											0.05212	1033	348	685	696	1381	0.503983	1
											0.05179	1033.5	348.5	685	697	1382	0.504342	1
											0.05169	1034	349	685	698	1383	0.5047	1
											0.05153	1034.5	349.5	685	699	1384	0.505058	1
											0.05147	1035	350	685	700	1385	0.505415	1
											0.05123	1035.5	350.5	685	701	1386	0.505772	1
											0.05101	1036	351	685	702	1387	0.506128	1
											0.05099	1036.5	351.5	685	703	1388	0.506484	1
											0.05088	1037	352	685	704	1389	0.506839	1
											0.05053	1037.5	352.5	685	705	1390	0.507194	1
											0.05036	1038	353	685	706	1391	0.507549	1
											0.05029	1038.5	353.5	685	707	1392	0.507902	1
											0.05022	1039	354	685	708	1393	0.508256	1
											0.05019	1039.5	354.5	685	709	1394	0.508608	1
											0.05007	1040	355	685	710	1395	0.508961	1
											0.04962	1040.5	355.5	685	711	1396	0.509312	1
											0.04961	1041	356	685	712	1397	0.509664	1
											0.04916	1041.5	356.5	685	713	1398	0.510014	1
											0.04894	1042	357	685	714	1399	0.510365	1
											0.04891	1042.5	357.5	685	715	1400	0.510714	1
											0.04872	1043	358	685	716	1401	0.511064	1
											0.04863	1043.5	358.5	685	717	1402	0.511412	1
											0.04863	1044	359	685	718	1403	0.511761	1
											0.04853	1044.5	359.5	685	719	1404	0.512108	1
											0.04838	1045	360	685	720	1405	0.512456	1
											0.0483	1045.5	360.5	685	721	1406	0.512802	1
											0.04828	1046	361	685	722	1407	0.513149	1
											0.04785	1046.5	361.5	685	723	1408	0.513494	1
											0.04784	1047	362	685	724	1409	0.51384	1
											0.04777	1047.5	362.5	685	725	1410	0.514184	1
											0.04755	1048	363	685	726	1411	0.514529	1
											0.0475	1048.5	363.5	685	727	1412	0.514873	1
											0.04738	1049	364	685	728	1413	0.515216	1
											0.04732	1049.5	364.5	685	729	1414	0.515559	1
											0.04721	1050	365	685	730	1415	0.515901	1
											0.04721	1050.5	365.5	685	731	1416	0.516243	1
											0.04702	1051	366	685	732	1417	0.516584	1
											0.04679	1051.5	366.5	685	733	1418	0.516925	1
											0.04654	1052	367	685	734	1419	0.517266	1
											0.04654	1052.5	367.5	685	735	1420	0.517606	1
											0.04628	1053	368	685	736	1421	0.517945	1
											0.04622	1053.5	368.5	685	737	1422	0.518284	1
											0.04603	1054	369	685	738	1423	0.518623	1
											0.04597	1054.5	369.5	685	739	1424	0.518961	1
											0.04591	1055	370	685	740	1425	0.519298	1
											0.04581	1055.5	370.5	685	741	1426	0.519635	1
											0.04561	1056	371	685	742	1427	0.519972	1
											0.04541	1056.5	371.5	685	743	1428	0.520308	1
											0.04541	1057	372	685	744	1429	0.520644	1
											0.04541	1057.5	372.5	685	745	1430	0.520979	1
											0.04536	1058	373	685	746	1431	0.521314	1
											0.04509	1058.5	373.5	685	747	1432	0.521648	1
											0.04496	1059	374	685	748	1433	0.521982	1
											0.04483	1059.5	374.5	685	749	1434	0.522315	1
											0.04477	1060	375	685	750	1435	0.522648	1
											0.04474	1060.5	375.5	685	751	1436	0.522981	1
											0.04447	1061	376	685	752	1437	0.523312	1
											0.04429	1061.5	376.5	685	753	1438	0.523644	1
											0.04418	1062	377	685	754	1439	0.523975	1
											0.04414	1062.5	377.5	685	755	1440	0.524306	1
											0.04414	1063	378	685	756	1441	0.524636	1
											0.04411	1063.5	378.5	685	757	1442	0.524965	1
											0.04411	1064	379	685	758	1443	0.525295	1
											0.04411	1064.5	379.5	685	759	1444	0.525623	1
											0.04402	1065	380	685	760	1445	0.525952	1
											0.04394	1065.5	380.5	685	761	1446	0.526279	1
											0.0438	1066	381	685	762	1447	0.526607	1
											0.04376	1066.5	381.5	685	763	1448	0.526934	1
											0.0436	1067	382	685	764	1449	0.52726	1
											0.04346	1067.5	382.5	685	765	1450	0.527586	1
											0.04343	1068	383	685	766	1451	0.527912	1
											0.04341	1068.5	383.5	685	767	1452	0.528237	1
											0.04335	1069	384	685	768	1453	0.528562	1
											0.04317	1069.5	384.5	685	769	1454	0.528886	1
											0.04304	1070	385	685	770	1455	0.52921	1
											0.04304	1070.5	385.5	685	771	1456	0.529533	1
											0.04303	1071	386	685	772	1457	0.529856	1
											0.043	1071.5	386.5	685	773	1458	0.530178	1
											0.04279	1072	387	685	774	1459	0.5305	1
											0.04267	1072.5	387.5	685	775	1460	0.530822	1
											0.04256	1073	388	685	776	1461	0.531143	1
											0.04256	1073.5	388.5	685	777	1462	0.531464	1
											0.04249	1074	389	685	778	1463	0.531784	1
											0.04248	1074.5	389.5	685	779	1464	0.532104	1
											0.04238	1075	390	685	780	1465	0.532423	1
											0.04231	1075.5	390.5	685	781	1466	0.532742	1
											0.04219	1076	391	685	782	1467	0.533061	1
											0.04204	1076.5	391.5	685	783	1468	0.533379	1
											0.04201	1077	392	685	784	1469	0.533696	1
											0.04183	1077.5	392.5	685	785	1470	0.534014	1
											0.04176	1078	393	685	786	1471	0.53433	1
											0.04169	1078.5	393.5	685	787	1472	0.534647	1
											0.04167	1079	394	685	788	1473	0.534963	1
											0.04145	1079.5	394.5	685	789	1474	0.535278	1
											0.04133	1080	395	685	790	1475	0.535593	1
											0.04128	1080.5	395.5	685	791	1476	0.535908	1
											0.04127	1081	396	685	792	1477	0.536222	1
											0.04123	1081.5	396.5	685	793	1478	0.536536	1
											0.04113	1082	397	685	794	1479	0.536849	1
											0.04096	1082.5	397.5	685	795	1480	0.537162	1
											0.04088	1083	398	685	796	1481	0.537475	1
											0.04083	1083.5	398.5	685	797	1482	0.537787	1
											0.04079	1084	399	685	798	1483	0.538098	1
											0.04076	1084.5	399.5	685	799	1484	0.53841	1
											0.0407	1085	400	685	800	1485	0.538721	1
											0.04064	1085.5	400.5	685	801	1486	0.539031	1
											0.04064	1086	401	685	802	1487	0.539341	1
											0.04058	1086.5	401.5	685	803	1488	0.539651	1
											0.04054	1087	402	685	804	1489	0.53996	1
											0.04052	1087.5	402.5	685	805	1490	0.540268	1
											0.04052	1088	403	685	806	1491	0.540577	1
											0.04035	1088.5	403.5	685	807	1492	0.540885	1
											0.04034	1089	404	685	808	1493	0.541192	1
											0.04027	1089.5	404.5	685	809	1494	0.541499	1
											0.04022	1090	405	685	810	1495	0.541806	1
											0.0402	1090.5	405.5	685	811	1496	0.542112	1
											0.04016	1091	406	685	812	1497	0.542418	1
											0.0401	1091.5	406.5	685	813	1498	0.542724	1
											0.04003	1092	407	685	814	1499	0.543029	1
											0.03997	1092.5	407.5	685	815	1500	0.543333	1
											0.03995	1093	408	685	816	1501	0.543638	1
											0.03986	1093.5	408.5	685	817	1502	0.543941	1
											0.03972	1094	409	685	818	1503	0.544245	1
											0.03965	1094.5	409.5	685	819	1504	0.544548	1
											0.03963	1095	410	685	820	1505	0.54485	1
											0.03958	1095.5	410.5	685	821	1506	0.545153	1
											0.03952	1096	411	685	822	1507	0.545455	1
											0.03943	1096.5	411.5	685	823	1508	0.545756	1
											0.0393	1097	412	685	824	1509	0.546057	1
											0.03929	1097.5	412.5	685	825	1510	0.546358	1
											0.03927	1098	413	685	826	1511	0.546658	1
											0.03927	1098.5	413.5	685	827	1512	0.546958	1
											0.03925	1099	414	685	828	1513	0.547257	1
											0.03919	1099.5	414.5	685	829	1514	0.547556	1
											0.03917	1100	415	685	830	1515	0.547855	1
											0.03911	1100.5	415.5	685	831	1516	0.548153	1
											0.03906	1101	416	685	832	1517	0.548451	1
											0.03901	1101.5	416.5	685	833	1518	0.548748	1
											0.03891	1102	417	685	834	1519	0.549045	1
											0.03886	1102.5	417.5	685	835	1520	0.549342	1
											0.03882	1103	418	685	836	1521	0.549638	1
											0.0387	1103.5	418.5	685	837	1522	0.549934	1
											0.03867	1104	419	685	838	1523	0.55023	1
											0.03866	1104.5	419.5	685	839	1524	0.550525	1
											0.03866	1105	420	685	840	1525	0.55082	1
											0.03833	1105.5	420.5	685	841	1526	0.551114	1
											0.03812	1106	421	685	842	1527	0.551408	1
											0.03801	1106.5	421.5	685	843	1528	0.551702	1
											0.03791	1107	422	685	844	1529	0.551995	1
											0.0379	1107.5	422.5	685	845	1530	0.552288	1
											0.03781	1108	423	685	846	1531	0.55258	1
											0.03753	1108.5	423.5	685	847	1532	0.552872	1
											0.03744	1109	424	685	848	1533	0.553164	1
											0.03735	1109.5	424.5	685	849	1534	0.553455	1
											0.0373	1110	425	685	850	1535	0.553746	1
											0.03728	1110.5	425.5	685	851	1536	0.554036	1
											0.03728	1111	426	685	852	1537	0.554327	1
											0.03726	1111.5	426.5	685	853	1538	0.554616	1
											0.03709	1112	427	685	854	1539	0.554906	1
											0.03685	1112.5	427.5	685	855	1540	0.555195	1
											0.03669	1113	428	685	856	1541	0.555483	1
											0.03654	1113.5	428.5	685	857	1542	0.555772	1
											0.03643	1114	429	685	858	1543	0.55606	1
											0.03639	1114.5	429.5	685	859	1544	0.556347	1
											0.03637	1115	430	685	860	1545	0.556634	1
											0.03627	1115.5	430.5	685	861	1546	0.556921	1
											0.03618	1116	431	685	862	1547	0.557207	1
											0.03615	1116.5	431.5	685	863	1548	0.557494	1
											0.03615	1117	432	685	864	1549	0.557779	1
											0.03608	1117.5	432.5	685	865	1550	0.558065	1
											0.03604	1118	433	685	866	1551	0.558349	1
											0.03598	1118.5	433.5	685	867	1552	0.558634	1
											0.03591	1119	434	685	868	1553	0.558918	1
											0.03584	1119.5	434.5	685	869	1554	0.559202	1
											0.03578	1120	435	685	870	1555	0.559486	1
											0.03575	1120.5	435.5	685	871	1556	0.559769	1
											0.03575	1121	436	685	872	1557	0.560051	1
											0.03572	1121.5	436.5	685	873	1558	0.560334	1
											0.03565	1122	437	685	874	1559	0.560616	1
											0.03559	1122.5	437.5	685	875	1560	0.560897	1
											0.03553	1123	438	685	876	1561	0.561179	1
											0.0355	1123.5	438.5	685	877	1562	0.56146	1
											0.03549	1124	439	685	878	1563	0.56174	1
											0.03547	1124.5	439.5	685	879	1564	0.56202	1
											0.03544	1125	440	685	880	1565	0.5623	1
											0.03541	1125.5	440.5	685	881	1566	0.56258	1
											0.03534	1126	441	685	882	1567	0.562859	1
											0.03523	1126.5	441.5	685	883	1568	0.563138	1
											0.03514	1127	442	685	884	1569	0.563416	1
											0.03511	1127.5	442.5	685	885	1570	0.563694	1
											0.035	1128	443	685	886	1571	0.563972	1
											0.03492	1128.5	443.5	685	887	1572	0.564249	1
											0.03489	1129	444	685	888	1573	0.564526	1
											0.03483	1129.5	444.5	685	889	1574	0.564803	1
											0.03478	1130	445	685	890	1575	0.565079	1
											0.03472	1130.5	445.5	685	891	1576	0.565355	1
											0.0347	1131	446	685	892	1577	0.565631	1
											0.03466	1131.5	446.5	685	893	1578	0.565906	1
											0.03466	1132	447	685	894	1579	0.566181	1
											0.03464	1132.5	447.5	685	895	1580	0.566456	1
											0.03456	1133	448	685	896	1581	0.56673	1
											0.03443	1133.5	448.5	685	897	1582	0.567004	1
											0.03443	1134	449	685	898	1583	0.567277	1
											0.03443	1134.5	449.5	685	899	1584	0.567551	1
											0.03443	1135	450	685	900	1585	0.567823	1
											0.0344	1135.5	450.5	685	901	1586	0.568096	1
											0.03436	1136	451	685	902	1587	0.568368	1
											0.0343	1136.5	451.5	685	903	1588	0.56864	1
											0.03425	1137	452	685	904	1589	0.568911	1
											0.03417	1137.5	452.5	685	905	1590	0.569182	1
											0.03409	1138	453	685	906	1591	0.569453	1
											0.03405	1138.5	453.5	685	907	1592	0.569724	1
											0.03395	1139	454	685	908	1593	0.569994	1
											0.0339	1139.5	454.5	685	909	1594	0.570263	1
											0.03382	1140	455	685	910	1595	0.570533	1
											0.03381	1140.5	455.5	685	911	1596	0.570802	1
											0.03381	1141	456	685	912	1597	0.571071	1
											0.0337	1141.5	456.5	685	913	1598	0.571339	1
											0.03355	1142	457	685	914	1599	0.571607	1
											0.03341	1142.5	457.5	685	915	1600	0.571875	1
											0.03328	1143	458	685	916	1601	0.572142	1
											0.03321	1143.5	458.5	685	917	1602	0.572409	1
											0.03302	1144	459	685	918	1603	0.572676	1
											0.03278	1144.5	459.5	685	919	1604	0.572943	1
											0.0325	1145	460	685	920	1605	0.573209	1
											0.03214	1145.5	460.5	685	921	1606	0.573474	1
											0.03211	1146	461	685	922	1607	0.57374	1
											0.03211	1146.5	461.5	685	923	1608	0.574005	1
											0.03174	1147	462	685	924	1609	0.57427	1
											0.03151	1147.5	462.5	685	925	1610	0.574534	1
											0.0313	1148	463	685	926	1611	0.574798	1
											0.0313	1148.5	463.5	685	927	1612	0.575062	1
											0.03124	1149	464	685	928	1613	0.575325	1
											0.031	1149.5	464.5	685	929	1614	0.575589	1
											0.03088	1150	465	685	930	1615	0.575851	1
											0.03064	1150.5	465.5	685	931	1616	0.576114	1
											0.03064	1151	466	685	932	1617	0.576376	1
											0.03028	1151.5	466.5	685	933	1618	0.576638	1
											0.02982	1152	467	685	934	1619	0.576899	1
											0.02967	1152.5	467.5	685	935	1620	0.57716	1
											0.02962	1153	468	685	936	1621	0.577421	1
											0.02959	1153.5	468.5	685	937	1622	0.577682	1
											0.02914	1154	469	685	938	1623	0.577942	1
											0.02905	1154.5	469.5	685	939	1624	0.578202	1
											0.02899	1155	470	685	940	1625	0.578462	1
											0.02881	1155.5	470.5	685	941	1626	0.578721	1
											0.02881	1156	471	685	942	1627	0.57898	1
											0.02837	1156.5	471.5	685	943	1628	0.579238	1
											0.02826	1157	472	685	944	1629	0.579497	1
											0.02784	1157.5	472.5	685	945	1630	0.579755	1
											0.02783	1158	473	685	946	1631	0.580012	1
											0.02776	1158.5	473.5	685	947	1632	0.58027	1
											0.02775	1159	474	685	948	1633	0.580527	1
											0.02773	1159.5	474.5	685	949	1634	0.580783	1
											0.02742	1160	475	685	950	1635	0.58104	1
											0.02721	1160.5	475.5	685	951	1636	0.581296	1
											0.02713	1161	476	685	952	1637	0.581552	1
											0.02661	1161.5	476.5	685	953	1638	0.581807	1
											0.02651	1162	477	685	954	1639	0.582062	1
											0.02636	1162.5	477.5	685	955	1640	0.582317	1
											0.02631	1163	478	685	956	1641	0.582572	1
											0.02631	1163.5	478.5	685	957	1642	0.582826	1
											0.02602	1164	479	685	958	1643	0.58308	1
											0.02583	1164.5	479.5	685	959	1644	0.583333	1
											0.02564	1165	480	685	960	1645	0.583587	1
											0.02528	1165.5	480.5	685	961	1646	0.58384	1
											0.02493	1166	481	685	962	1647	0.584092	1
											0.02466	1166.5	481.5	685	963	1648	0.584345	1
											0.02406	1167	482	685	964	1649	0.584597	1
											0.02358	1167.5	482.5	685	965	1650	0.584848	1
											0.02349	1168	483	685	966	1651	0.5851	1
											0.02344	1168.5	483.5	685	967	1652	0.585351	1
											0.02305	1169	484	685	968	1653	0.585602	1
											0.02283	1169.5	484.5	685	969	1654	0.585852	1
											0.02235	1170	485	685	970	1655	0.586103	1
											0.02222	1170.5	485.5	685	971	1656	0.586353	1
											0.02161	1171	486	685	972	1657	0.586602	1
											0.02146	1171.5	486.5	685	973	1658	0.586852	1
											0.02127	1172	487	685	974	1659	0.587101	1
											0.02123	1172.5	487.5	685	975	1660	0.587349	1
											0.02039	1173	488	685	976	1661	0.587598	1
											0.01979	1173.5	488.5	685	977	1662	0.587846	1
											0.01959	1174	489	685	978	1663	0.588094	1
											0.01918	1174.5	489.5	685	979	1664	0.588341	1
											0.01805	1175	490	685	980	1665	0.588589	1
											0.018	1175.5	490.5	685	981	1666	0.588836	1
											0.01797	1176	491	685	982	1667	0.589082	1
											0.01737	1176.5	491.5	685	983	1668	0.589329	1
											0.01677	1177	492	685	984	1669	0.589575	1
											0.01649	1177.5	492.5	685	985	1670	0.58982	1
											0.01617	1178	493	685	986	1671	0.590066	1
											0.01617	1178.5	493.5	685	987	1672	0.590311	1
											0.01594	1179	494	685	988	1673	0.590556	1
											0.01556	1179.5	494.5	685	989	1674	0.5908	1
											0.01519	1180	495	685	990	1675	0.591045	1
											0.01506	1180.5	495.5	685	991	1676	0.591289	1
											0.01496	1181	496	685	992	1677	0.591532	1
											0.01456	1181.5	496.5	685	993	1678	0.591776	1
											0.01415	1182	497	685	994	1679	0.592019	1
											0.01282	1182.5	497.5	685	995	1680	0.592262	1
											0.01222	1183	498	685	996	1681	0.592504	1
											0.01207	1183.5	498.5	685	997	1682	0.592747	1
											0.01197	1184	499	685	998	1683	0.592989	1
											0.01184	1184.5	499.5	685	999	1684	0.59323	1
											0.0081	1185	500	685	1000	1685	0.593472	1
											0.00765	1185.5	500.5	685	1001	1686	0.593713	1
											0.006968	1186	501	685	1002	1687	0.593954	1
											0.004916	1186.5	501.5	685	1003	1688	0.594194	1
											0.004916	1187	502	685	1004	1689	0.594435	1
											0.004916	1187.5	502.5	685	1005	1690	0.594675	1
											0.00115	1188	503	685	1006	1691	0.594914	1
											0.00115	1188.5	503.5	685	1007	1692	0.595154	1

## Sheet: Spectral Level Data
Spectral Level Data		Confidence Threshold	Forward	Reverse	Correct	Incorrect	Total	Global FDR	q-value		Fit Confidence Threshold	Fit Forward	Fit Reverse	Fit Correct	Fit Incorrect	Fit Total	Fit Global FDR	Fit Local FDR
		1	96	0	96	0	96	0	0		1	0.999998	1.7507e-06	0.999996	3.50141e-06	1	3.50141e-06	3.50161e-06
		0.9999	536	0	536	0	536	0	0		1	2	3.50141e-06	1.99999	7.00282e-06	2	3.50141e-06	3.50161e-06
		0.9998	1946	0	1946	0	1946	0	0		1	2.99999	5.25212e-06	2.99999	1.05042e-05	3	3.50141e-06	3.50161e-06
		0.9997	1948	0	1948	0	1948	0	0		1	3.99999	7.00283e-06	3.99999	1.40057e-05	4	3.50141e-06	3.50161e-06
		0.9996	2474	0	2474	0	2474	0	0		1	4.99999	8.75354e-06	4.99998	1.75071e-05	5	3.50142e-06	3.50161e-06
		0.9995	2482	0	2482	0	2482	0	0		1	5.99999	1.05043e-05	5.99998	2.10085e-05	6	3.50142e-06	3.50161e-06
		0.9994	2483	0	2483	0	2483	0	0		1	6.99999	1.2255e-05	6.99998	2.45099e-05	7	3.50142e-06	3.50161e-06
		0.9993	2596	0	2596	0	2596	0	0		1	7.99999	1.40057e-05	7.99997	2.80114e-05	8	3.50142e-06	3.50161e-06
		0.9992	2602	0	2602	0	2602	0	0		1	8.99998	1.57564e-05	8.99997	3.15128e-05	9	3.50142e-06	3.50161e-06
		0.999	2603	0	2603	0	2603	0	0		1	9.99998	1.75071e-05	9.99996	3.50143e-05	10	3.50143e-06	3.50161e-06
		0.9989	2616	0	2616	0	2616	0	0		1	11	1.92579e-05	11	3.85157e-05	11	3.50143e-06	3.50161e-06
		0.9987	2617	0	2617	0	2617	0	0		1	12	2.10086e-05	12	4.20172e-05	12	3.50143e-06	3.50161e-06
		0.9986	2619	0	2619	0	2619	0	0		1	13	2.27593e-05	13	4.55186e-05	13	3.50143e-06	3.50161e-06
		0.9985	2620	0	2620	0	2620	0	0		1	14	2.451e-05	14	4.90201e-05	14	3.50144e-06	3.50161e-06
		0.9982	2621	0	2621	0	2621	0	0		1	15	2.62608e-05	14.9999	5.25216e-05	15	3.50144e-06	3.50161e-06
		0.9981	2622	0	2622	0	2622	0	0		1	16	2.80115e-05	15.9999	5.6023e-05	16	3.50144e-06	3.50161e-06
		0.9979	2625	0	2625	0	2625	0	0		1	17	2.97623e-05	16.9999	5.95245e-05	17	3.50144e-06	3.50161e-06
		0.9976	2626	0	2626	0	2626	0	0		1	18	3.1513e-05	17.9999	6.3026e-05	18	3.50144e-06	3.50161e-06
		0.9974	2662	1	2661	2	2663	0.000751033	0.000624415		1	19	3.32637e-05	18.9999	6.65275e-05	19	3.50145e-06	3.50161e-06
		0.9972	2666	1	2665	2	2667	0.000749906	0.000624415		1	20	3.50145e-05	19.9999	7.0029e-05	20	3.50145e-06	3.50161e-06
		0.9971	2699	1	2698	2	2700	0.000740741	0.000624415		1	21	3.67652e-05	20.9999	7.35305e-05	21	3.50145e-06	3.50161e-06
		0.997	2828	1	2827	2	2829	0.000706964	0.000624415		1	22	3.8516e-05	21.9999	7.7032e-05	22	3.50145e-06	3.50161e-06
		0.9967	2829	1	2828	2	2830	0.000706714	0.000624415		1	23	4.02667e-05	22.9999	8.05335e-05	23	3.50145e-06	3.50161e-06
		0.9964	2944	1	2943	2	2945	0.000679117	0.000624415		1	24	4.20175e-05	23.9999	8.4035e-05	24	3.50146e-06	3.50161e-06
		0.9961	2950	1	2949	2	2951	0.000677736	0.000624415		1	25	4.37682e-05	24.9999	8.75365e-05	25	3.50146e-06	3.50161e-06
		0.9954	2952	1	2951	2	2953	0.000677277	0.000624415		1	26	4.5519e-05	25.9999	9.1038e-05	26	3.50146e-06	3.50161e-06
		0.9953	2956	1	2955	2	2957	0.000676361	0.000624415		1	27	4.72698e-05	26.9999	9.45395e-05	27	3.50146e-06	3.50161e-06
		0.9946	2962	1	2961	2	2963	0.000674992	0.000624415		1	28	4.90205e-05	27.9999	9.8041e-05	28	3.50147e-06	3.50161e-06
		0.9943	3039	1	3038	2	3040	0.000657895	0.000624415		1	28.9999	5.07713e-05	28.9999	0.000101543	29	3.50147e-06	3.50161e-06
		0.9941	3041	1	3040	2	3042	0.000657462	0.000624415		1	29.9999	5.2522e-05	29.9999	0.000105044	30	3.50147e-06	3.50161e-06
		0.9939	3042	1	3041	2	3043	0.000657246	0.000624415		1	30.9999	5.42728e-05	30.9999	0.000108546	31	3.50147e-06	3.50161e-06
		0.9936	3043	1	3042	2	3044	0.00065703	0.000624415		1	31.9999	5.60236e-05	31.9999	0.000112047	32	3.50147e-06	3.50161e-06
		0.9928	3044	1	3043	2	3045	0.000656814	0.000624415		1	32.9999	5.77744e-05	32.9999	0.000115549	33	3.50148e-06	3.50161e-06
		0.9924	3060	1	3059	2	3061	0.000653381	0.000624415		1	33.9999	5.95251e-05	33.9999	0.00011905	34	3.50148e-06	3.50161e-06
		0.9911	3062	1	3061	2	3063	0.000652955	0.000624415		1	34.9999	6.12759e-05	34.9999	0.000122552	35	3.50148e-06	3.50161e-06
		0.991	3088	1	3087	2	3089	0.000647459	0.000624415		1	35.9999	6.30267e-05	35.9999	0.000126053	36	3.50148e-06	3.50161e-06
		0.9906	3097	1	3096	2	3098	0.000645578	0.000624415		1	36.9999	6.47775e-05	36.9999	0.000129555	37	3.50148e-06	3.50161e-06
		0.9902	3098	1	3097	2	3099	0.000645369	0.000624415		1	37.9999	6.65282e-05	37.9999	0.000133056	38	3.50149e-06	3.50161e-06
		0.9896	3100	1	3099	2	3101	0.000644953	0.000624415		1	38.9999	6.8279e-05	38.9999	0.000136558	39	3.50149e-06	3.50161e-06
		0.9894	3111	1	3110	2	3112	0.000642674	0.000624415		1	39.9999	7.00298e-05	39.9999	0.00014006	40	3.50149e-06	3.50161e-06
		0.9892	3150	1	3149	2	3151	0.000634719	0.000624415		1	40.9999	7.17806e-05	40.9999	0.000143561	41	3.50149e-06	3.50161e-06
		0.989	3151	1	3150	2	3152	0.000634518	0.000624415		1	41.9999	7.35314e-05	41.9999	0.000147063	42	3.5015e-06	3.50161e-06
		0.9886	3152	1	3151	2	3153	0.000634317	0.000624415		1	42.9999	7.52822e-05	42.9998	0.000150564	43	3.5015e-06	3.50161e-06
		0.9881	3176	1	3175	2	3177	0.000629525	0.000624415		1	43.9999	7.7033e-05	43.9998	0.000154066	44	3.5015e-06	3.50161e-06
		0.9879	3177	1	3176	2	3178	0.000629327	0.000624415		1	44.9999	7.87838e-05	44.9998	0.000157568	45	3.5015e-06	3.50161e-06
		0.9878	3178	1	3177	2	3179	0.000629129	0.000624415		1	45.9999	8.05346e-05	45.9998	0.000161069	46	3.5015e-06	3.50161e-06
		0.9875	3190	1	3189	2	3191	0.000626763	0.000624415		1	46.9999	8.22854e-05	46.9998	0.000164571	47	3.50151e-06	3.50161e-06
		0.9868	3202	1	3201	2	3203	0.000624415	0.000624415		1	47.9999	8.40362e-05	47.9998	0.000168072	48	3.50151e-06	3.50161e-06
		0.9866	3202	2	3200	4	3204	0.00124844	0.00112549		1	48.9999	8.5787e-05	48.9998	0.000171574	49	3.50151e-06	3.50161e-06
		0.9864	3203	2	3201	4	3205	0.00124805	0.00112549		1	49.9999	8.75378e-05	49.9998	0.000175076	50	3.50151e-06	3.50161e-06
		0.9858	3204	2	3202	4	3206	0.00124766	0.00112549		1	50.9999	8.92886e-05	50.9998	0.000178577	51	3.50151e-06	3.50161e-06
		0.9857	3208	2	3206	4	3210	0.00124611	0.00112549		1	51.9999	9.10394e-05	51.9998	0.000182079	52	3.50152e-06	3.50161e-06
		0.9855	3219	2	3217	4	3221	0.00124185	0.00112549		1	52.9999	9.27902e-05	52.9998	0.00018558	53	3.50152e-06	3.50161e-06
		0.9852	3228	2	3226	4	3230	0.00123839	0.00112549		1	53.9999	9.45411e-05	53.9998	0.000189082	54	3.50152e-06	3.50161e-06
		0.9851	3229	2	3227	4	3231	0.00123801	0.00112549		1	54.9999	9.62919e-05	54.9998	0.000192584	55	3.50152e-06	3.50161e-06
		0.9848	3239	2	3237	4	3241	0.00123419	0.00112549		1	55.9999	9.80427e-05	55.9998	0.000196085	56	3.50152e-06	3.50161e-06
		0.9841	3243	2	3241	4	3245	0.00123267	0.00112549		1	56.9999	9.97935e-05	56.9998	0.000199587	57	3.50153e-06	3.50161e-06
		0.9834	3262	2	3260	4	3264	0.00122549	0.00112549		1	57.9999	0.000101544	57.9998	0.000203089	58	3.50153e-06	3.50161e-06
		0.9826	3268	2	3266	4	3270	0.00122324	0.00112549		1	58.9999	0.000103295	58.9998	0.00020659	59	3.50153e-06	3.50161e-06
		0.9825	3269	2	3267	4	3271	0.00122287	0.00112549		1	59.9999	0.000105046	59.9998	0.000210092	60	3.50153e-06	3.50161e-06
		0.982	3270	2	3268	4	3272	0.00122249	0.00112549		1	60.9999	0.000106797	60.9998	0.000213594	61	3.50154e-06	3.50161e-06
		0.9818	3282	2	3280	4	3284	0.00121803	0.00112549		1	61.9999	0.000108548	61.9998	0.000217095	62	3.50154e-06	3.50161e-06
		0.981	3283	2	3281	4	3285	0.00121766	0.00112549		1	62.9999	0.000110298	62.9998	0.000220597	63	3.50154e-06	3.50161e-06
		0.9806	3284	2	3282	4	3286	0.00121729	0.00112549		1	63.9999	0.000112049	63.9998	0.000224099	64	3.50154e-06	3.50161e-06
		0.9802	3305	2	3303	4	3307	0.00120956	0.00112549		1	64.9999	0.0001138	64.9998	0.0002276	65	3.50154e-06	3.50161e-06
		0.9793	3327	2	3325	4	3329	0.00120156	0.00112549		1	65.9999	0.000115551	65.9998	0.000231102	66	3.50155e-06	3.50161e-06
		0.9783	3329	2	3327	4	3331	0.00120084	0.00112549		1	66.9999	0.000117302	66.9998	0.000234604	67	3.50155e-06	3.50161e-06
		0.9774	3345	2	3343	4	3347	0.0011951	0.00112549		1	67.9999	0.000119053	67.9998	0.000238105	68	3.50155e-06	3.50161e-06
		0.9772	3354	2	3352	4	3356	0.0011919	0.00112549		1	68.9999	0.000120804	68.9998	0.000241607	69	3.50155e-06	3.50161e-06
		0.9764	3362	2	3360	4	3364	0.00118906	0.00112549		1	69.9999	0.000122554	69.9998	0.000245109	70	3.50155e-06	3.50161e-06
		0.9755	3363	2	3361	4	3365	0.00118871	0.00112549		1	70.9999	0.000124305	70.9998	0.000248611	71	3.50156e-06	3.50161e-06
		0.9754	3366	2	3364	4	3368	0.00118765	0.00112549		1	71.9999	0.000126056	71.9997	0.000252112	72	3.50156e-06	3.50161e-06
		0.9748	3367	2	3365	4	3369	0.0011873	0.00112549		1	72.9999	0.000127807	72.9997	0.000255614	73	3.50156e-06	3.50161e-06
		0.9744	3370	2	3368	4	3372	0.00118624	0.00112549		1	73.9999	0.000129558	73.9997	0.000259116	74	3.50156e-06	3.50161e-06
		0.9743	3372	2	3370	4	3374	0.00118554	0.00112549		1	74.9999	0.000131309	74.9997	0.000262617	75	3.50157e-06	3.50161e-06
		0.9733	3375	2	3373	4	3377	0.00118448	0.00112549		1	75.9999	0.00013306	75.9997	0.000266119	76	3.50157e-06	3.50161e-06
		0.9732	3376	2	3374	4	3378	0.00118413	0.00112549		1	76.9999	0.00013481	76.9997	0.000269621	77	3.50157e-06	3.50161e-06
		0.972	3379	2	3377	4	3381	0.00118308	0.00112549		1	77.9999	0.000136561	77.9997	0.000273123	78	3.50157e-06	3.50161e-06
		0.9717	3380	2	3378	4	3382	0.00118273	0.00112549		1	78.9999	0.000138312	78.9997	0.000276624	79	3.50157e-06	3.50161e-06
		0.9716	3389	2	3387	4	3391	0.00117959	0.00112549		1	79.9999	0.000140063	79.9997	0.000280126	80	3.50158e-06	3.50161e-06
		0.9712	3391	2	3389	4	3393	0.0011789	0.00112549		1	80.9999	0.000141814	80.9997	0.000283628	81	3.50158e-06	3.50161e-06
		0.9711	3409	2	3407	4	3411	0.00117268	0.00112549		1	81.9999	0.000143565	81.9997	0.00028713	82	3.50158e-06	3.50161e-06
		0.9708	3410	2	3408	4	3412	0.00117233	0.00112549		1	82.9999	0.000145316	82.9997	0.000290631	83	3.50158e-06	3.50161e-06
		0.9707	3419	2	3417	4	3421	0.00116925	0.00112549		1	83.9999	0.000147067	83.9997	0.000294133	84	3.50158e-06	3.50161e-06
		0.97	3423	2	3421	4	3425	0.00116788	0.00112549		1	84.9999	0.000148817	84.9997	0.000297635	85	3.50159e-06	3.50161e-06
		0.9696	3426	2	3424	4	3428	0.00116686	0.00112549		1	85.9998	0.000150568	85.9997	0.000301137	86	3.50159e-06	3.50161e-06
		0.9686	3427	2	3425	4	3429	0.00116652	0.00112549		1	86.9998	0.000152319	86.9997	0.000304638	87	3.50159e-06	3.50161e-06
		0.9676	3428	2	3426	4	3430	0.00116618	0.00112549		1	87.9998	0.00015407	87.9997	0.00030814	88	3.50159e-06	3.50161e-06
		0.967	3429	2	3427	4	3431	0.00116584	0.00112549		1	88.9998	0.000155821	88.9997	0.000311642	89	3.50159e-06	3.50161e-06
		0.9669	3441	2	3439	4	3443	0.00116178	0.00112549		1	89.9998	0.000157572	89.9997	0.000315144	90	3.5016e-06	3.50161e-06
		0.9658	3442	2	3440	4	3444	0.00116144	0.00112549		1	90.9998	0.000159323	90.9997	0.000318646	91	3.5016e-06	3.50161e-06
		0.9655	3443	2	3441	4	3445	0.0011611	0.00112549		1	91.9998	0.000161074	91.9997	0.000322147	92	3.5016e-06	3.50161e-06
		0.965	3444	2	3442	4	3446	0.00116077	0.00112549		1	92.9998	0.000162825	92.9997	0.000325649	93	3.5016e-06	3.50161e-06
		0.9645	3509	2	3507	4	3511	0.00113928	0.00112549		1	93.9998	0.000164575	93.9997	0.000329151	94	3.50161e-06	3.50161e-06
		0.964	3510	2	3508	4	3512	0.00113895	0.00112549		1	94.9998	0.000166326	94.9997	0.000332653	95	3.50161e-06	3.50161e-06
		0.9632	3513	2	3511	4	3515	0.00113798	0.00112549		1	95.9998	0.000168077	95.9997	0.000336155	96	3.50161e-06	3.50161e-06
		0.9625	3515	2	3513	4	3517	0.00113733	0.00112549		0.9999	96.9998	0.000169828	96.9997	0.000339656	97	3.50161e-06	3.50275e-06
		0.9622	3518	2	3516	4	3520	0.00113636	0.00112549		0.9999	97.9998	0.000171579	97.9997	0.000343158	98	3.50161e-06	3.50275e-06
		0.9614	3521	2	3519	4	3523	0.0011354	0.00112549		0.9999	98.9998	0.00017333	98.9997	0.00034666	99	3.50162e-06	3.50275e-06
		0.9609	3541	2	3539	4	3543	0.00112899	0.00112549		0.9999	99.9998	0.000175081	99.9996	0.000350162	100	3.50162e-06	3.50275e-06
		0.9608	3542	2	3540	4	3544	0.00112867	0.00112549		0.9999	101	0.000176832	101	0.000353664	101	3.50162e-06	3.50275e-06
		0.9607	3543	2	3541	4	3545	0.00112835	0.00112549		0.9999	102	0.000178583	102	0.000357166	102	3.50162e-06	3.50275e-06
		0.9596	3551	2	3549	4	3553	0.00112581	0.00112549		0.9999	103	0.000180334	103	0.000360667	103	3.50162e-06	3.50275e-06
		0.9595	3552	2	3550	4	3554	0.00112549	0.00112549		0.9999	104	0.000182085	104	0.000364169	104	3.50163e-06	3.50275e-06
		0.9593	3553	3	3550	6	3556	0.00168729	0.00156454		0.9999	105	0.000183836	105	0.000367671	105	3.50163e-06	3.50275e-06
		0.9592	3555	3	3552	6	3558	0.00168634	0.00156454		0.9999	106	0.000185586	106	0.000371173	106	3.50163e-06	3.50275e-06
		0.9583	3556	3	3553	6	3559	0.00168587	0.00156454		0.9999	107	0.000187337	107	0.000374675	107	3.50163e-06	3.50275e-06
		0.9578	3559	3	3556	6	3562	0.00168445	0.00156454		0.9999	108	0.000189088	108	0.000378177	108	3.50164e-06	3.50275e-06
		0.9576	3592	3	3589	6	3595	0.00166898	0.00156454		0.9999	109	0.000190839	109	0.000381678	109	3.50164e-06	3.50275e-06
		0.9567	3593	3	3590	6	3596	0.00166852	0.00156454		0.9999	110	0.00019259	110	0.00038518	110	3.50164e-06	3.50275e-06
		0.9558	3595	3	3592	6	3598	0.00166759	0.00156454		0.9999	111	0.000194341	111	0.000388682	111	3.50164e-06	3.50275e-06
		0.9556	3596	3	3593	6	3599	0.00166713	0.00156454		0.9999	112	0.000196092	112	0.000392184	112	3.50164e-06	3.50275e-06
		0.9542	3599	3	3596	6	3602	0.00166574	0.00156454		0.9999	113	0.000197843	113	0.000395686	113	3.50165e-06	3.50275e-06
		0.9539	3629	3	3626	6	3632	0.00165198	0.00156454		0.9999	114	0.000199594	114	0.000399188	114	3.50165e-06	3.50275e-06
		0.9526	3632	3	3629	6	3635	0.00165062	0.00156454		0.9999	115	0.000201345	115	0.00040269	115	3.50165e-06	3.50275e-06
		0.9524	3634	3	3631	6	3637	0.00164971	0.00156454		0.9999	116	0.000203096	116	0.000406192	116	3.50165e-06	3.50275e-06
		0.952	3635	3	3632	6	3638	0.00164926	0.00156454		0.9999	117	0.000204847	117	0.000409694	117	3.50165e-06	3.50275e-06
		0.9514	3636	3	3633	6	3639	0.0016488	0.00156454		0.9999	118	0.000206598	118	0.000413195	118	3.50166e-06	3.50275e-06
		0.9505	3645	3	3642	6	3648	0.00164474	0.00156454		0.9999	119	0.000208349	119	0.000416697	119	3.50166e-06	3.50275e-06
		0.95	3646	3	3643	6	3649	0.00164429	0.00156454		0.9999	120	0.0002101	120	0.000420199	120	3.50166e-06	3.50275e-06
		0.9491	3686	3	3683	6	3689	0.00162646	0.00156454		0.9999	121	0.000211851	121	0.000423701	121	3.50166e-06	3.50275e-06
		0.949	3688	3	3685	6	3691	0.00162558	0.00156454		0.9999	122	0.000213602	122	0.000427203	122	3.50167e-06	3.50275e-06
		0.9486	3690	3	3687	6	3693	0.0016247	0.00156454		0.9999	123	0.000215353	123	0.000430705	123	3.50167e-06	3.50275e-06
		0.9479	3692	3	3689	6	3695	0.00162382	0.00156454		0.9999	124	0.000217103	124	0.000434207	124	3.50167e-06	3.50275e-06
		0.9478	3696	3	3693	6	3699	0.00162206	0.00156454		0.9999	125	0.000218854	125	0.000437709	125	3.50167e-06	3.50275e-06
		0.9466	3701	3	3698	6	3704	0.00161987	0.00156454		0.9999	126	0.000220605	126	0.000441211	126	3.50167e-06	3.50275e-06
		0.9457	3713	3	3710	6	3716	0.00161464	0.00156454		0.9999	127	0.000222356	127	0.000444713	127	3.50168e-06	3.50275e-06
		0.945	3715	3	3712	6	3718	0.00161377	0.00156454		0.9999	128	0.000224107	128	0.000448215	128	3.50168e-06	3.50275e-06
		0.9447	3717	3	3714	6	3720	0.0016129	0.00156454		0.9999	129	0.000225858	129	0.000451717	129	3.50168e-06	3.50275e-06
		0.9445	3718	3	3715	6	3721	0.00161247	0.00156454		0.9999	130	0.000227609	130	0.000455219	130	3.50168e-06	3.50275e-06
		0.9439	3723	3	3720	6	3726	0.00161031	0.00156454		0.9999	131	0.00022936	131	0.000458721	131	3.50168e-06	3.50275e-06
		0.9437	3739	3	3736	6	3742	0.00160342	0.00156454		0.9999	132	0.000231111	132	0.000462223	132	3.50169e-06	3.50275e-06
		0.9435	3740	3	3737	6	3743	0.00160299	0.00156454		0.9999	133	0.000232862	133	0.000465725	133	3.50169e-06	3.50275e-06
		0.9425	3749	3	3746	6	3752	0.00159915	0.00156454		0.9999	134	0.000234613	134	0.000469227	134	3.50169e-06	3.50275e-06
		0.9411	3762	3	3759	6	3765	0.00159363	0.00156454		0.9999	135	0.000236364	135	0.000472729	135	3.50169e-06	3.50275e-06
		0.9402	3764	3	3761	6	3767	0.00159278	0.00156454		0.9999	136	0.000238115	136	0.00047623	136	3.50169e-06	3.50275e-06
		0.9386	3765	3	3762	6	3768	0.00159236	0.00156454		0.9999	137	0.000239866	137	0.000479732	137	3.5017e-06	3.50275e-06
		0.9378	3790	3	3787	6	3793	0.00158186	0.00156454		0.9999	138	0.000241617	138	0.000483234	138	3.5017e-06	3.50275e-06
		0.9377	3791	3	3788	6	3794	0.00158144	0.00156454		0.9999	139	0.000243368	139	0.000486736	139	3.5017e-06	3.50275e-06
		0.9362	3792	3	3789	6	3795	0.00158103	0.00156454		0.9999	140	0.000245119	140	0.000490238	140	3.5017e-06	3.50275e-06
		0.9361	3804	3	3801	6	3807	0.00157604	0.00156454		0.9999	141	0.00024687	141	0.00049374	141	3.50171e-06	3.50275e-06
		0.9354	3805	3	3802	6	3808	0.00157563	0.00156454		0.9999	142	0.000248621	142	0.000497242	142	3.50171e-06	3.50275e-06
		0.9353	3806	3	3803	6	3809	0.00157522	0.00156454		0.9999	143	0.000250372	142.999	0.000500744	143	3.50171e-06	3.50275e-06
		0.934	3807	3	3804	6	3810	0.0015748	0.00156454		0.9999	144	0.000252123	143.999	0.000504247	144	3.50171e-06	3.50275e-06
		0.9334	3808	3	3805	6	3811	0.00157439	0.00156454		0.9999	145	0.000253874	144.999	0.000507749	145	3.50171e-06	3.50275e-06
		0.9329	3814	3	3811	6	3817	0.00157192	0.00156454		0.9999	146	0.000255625	145.999	0.000511251	146	3.50172e-06	3.50275e-06
		0.9306	3815	3	3812	6	3818	0.0015715	0.00156454		0.9999	147	0.000257376	146.999	0.000514753	147	3.50172e-06	3.50275e-06
		0.9304	3816	3	3813	6	3819	0.00157109	0.00156454		0.9999	148	0.000259127	147.999	0.000518255	148	3.50172e-06	3.50275e-06
		0.9298	3825	3	3822	6	3828	0.0015674	0.00156454		0.9999	149	0.000260878	148.999	0.000521757	149	3.50172e-06	3.50275e-06
		0.9288	3830	3	3827	6	3833	0.00156535	0.00156454		0.9999	150	0.000262629	149.999	0.000525259	150	3.50172e-06	3.50275e-06
		0.9277	3831	3	3828	6	3834	0.00156495	0.00156454		0.9999	151	0.00026438	150.999	0.000528761	151	3.50173e-06	3.50275e-06
		0.9274	3832	3	3829	6	3835	0.00156454	0.00156454		0.9999	152	0.000266131	151.999	0.000532263	152	3.50173e-06	3.50275e-06
		0.9249	3832	4	3828	8	3836	0.00208551	0.00205656		0.9999	153	0.000267882	152.999	0.000535765	153	3.50173e-06	3.50275e-06
		0.9247	3834	4	3830	8	3838	0.00208442	0.00205656		0.9999	154	0.000269633	153.999	0.000539267	154	3.50173e-06	3.50275e-06
		0.9226	3835	4	3831	8	3839	0.00208388	0.00205656		0.9999	155	0.000271384	154.999	0.000542769	155	3.50174e-06	3.50275e-06
		0.922	3839	4	3835	8	3843	0.00208171	0.00205656		0.9999	156	0.000273136	155.999	0.000546271	156	3.50174e-06	3.50275e-06
		0.9215	3840	4	3836	8	3844	0.00208117	0.00205656		0.9999	157	0.000274887	156.999	0.000549773	157	3.50174e-06	3.50275e-06
		0.9201	3864	4	3860	8	3868	0.00206825	0.00205656		0.9999	158	0.000276638	157.999	0.000553275	158	3.50174e-06	3.50275e-06
		0.92	3865	4	3861	8	3869	0.00206772	0.00205656		0.9999	159	0.000278389	158.999	0.000556777	159	3.50174e-06	3.50275e-06
		0.9192	3885	4	3881	8	3889	0.00205708	0.00205656		0.9999	160	0.00028014	159.999	0.000560279	160	3.50175e-06	3.50275e-06
		0.9191	3886	4	3882	8	3890	0.00205656	0.00205656		0.9999	161	0.000281891	160.999	0.000563781	161	3.50175e-06	3.50275e-06
		0.9188	3886	5	3881	10	3891	0.00257003	0.00256805		0.9999	162	0.000283642	161.999	0.000567284	162	3.50175e-06	3.50275e-06
		0.9183	3888	5	3883	10	3893	0.00256871	0.00256805		0.9999	163	0.000285393	162.999	0.000570786	163	3.50175e-06	3.50275e-06
		0.9177	3889	5	3884	10	3894	0.00256805	0.00256805		0.9999	164	0.000287144	163.999	0.000574288	164	3.50175e-06	3.50275e-06
		0.916	3906	6	3900	12	3912	0.00306748	0.0030581		0.9999	165	0.000288895	164.999	0.00057779	165	3.50176e-06	3.50275e-06
		0.9149	3907	6	3901	12	3913	0.0030667	0.0030581		0.9999	166	0.000290646	165.999	0.000581292	166	3.50176e-06	3.50275e-06
		0.9128	3908	6	3902	12	3914	0.00306592	0.0030581		0.9999	167	0.000292397	166.999	0.000584794	167	3.50176e-06	3.50275e-06
		0.9113	3916	6	3910	12	3922	0.00305966	0.0030581		0.9999	168	0.000294148	167.999	0.000588296	168	3.50176e-06	3.50275e-06
		0.9107	3917	6	3911	12	3923	0.00305888	0.0030581		0.9999	169	0.000295899	168.999	0.000591798	169	3.50176e-06	3.50275e-06
		0.9095	3918	6	3912	12	3924	0.0030581	0.0030581		0.9999	170	0.00029765	169.999	0.0005953	170	3.50177e-06	3.50275e-06
		0.9093	3918	7	3911	14	3925	0.00356688	0.0035452		0.9999	171	0.000299401	170.999	0.000598803	171	3.50177e-06	3.50275e-06
		0.9076	3919	7	3912	14	3926	0.00356597	0.0035452		0.9999	172	0.000301152	171.999	0.000602305	172	3.50177e-06	3.50275e-06
		0.9068	3920	7	3913	14	3927	0.00356506	0.0035452		0.9999	173	0.000302903	172.999	0.000605807	173	3.50177e-06	3.50275e-06
		0.906	3922	7	3915	14	3929	0.00356325	0.0035452		0.9999	174	0.000304654	173.999	0.000609309	174	3.50178e-06	3.50275e-06
		0.9038	3923	7	3916	14	3930	0.00356234	0.0035452		0.9999	175	0.000306406	174.999	0.000612811	175	3.50178e-06	3.50275e-06
		0.9037	3927	7	3920	14	3934	0.00355872	0.0035452		0.9999	176	0.000308157	175.999	0.000616313	176	3.50178e-06	3.50275e-06
		0.9025	3930	7	3923	14	3937	0.00355601	0.0035452		0.9999	177	0.000309908	176.999	0.000619815	177	3.50178e-06	3.50275e-06
		0.8998	3931	7	3924	14	3938	0.0035551	0.0035452		0.9999	178	0.000311659	177.999	0.000623318	178	3.50178e-06	3.50275e-06
		0.8995	3939	7	3932	14	3946	0.0035479	0.0035452		0.9999	179	0.00031341	178.999	0.00062682	179	3.50179e-06	3.50275e-06
		0.8993	3940	7	3933	14	3947	0.003547	0.0035452		0.9999	180	0.000315161	179.999	0.000630322	180	3.50179e-06	3.50275e-06
		0.8988	3941	7	3934	14	3948	0.0035461	0.0035452		0.9999	181	0.000316912	180.999	0.000633824	181	3.50179e-06	3.50275e-06
		0.8964	3942	7	3935	14	3949	0.0035452	0.0035452		0.9999	182	0.000318663	181.999	0.000637326	182	3.50179e-06	3.50275e-06
		0.8956	3996	10	3986	20	4006	0.00499251	0.00498008		0.9999	183	0.000320414	182.999	0.000640828	183	3.50179e-06	3.50275e-06
		0.8951	3997	10	3987	20	4007	0.00499127	0.00498008		0.9999	184	0.000322165	183.999	0.000644331	184	3.5018e-06	3.50275e-06
		0.895	4006	10	3996	20	4016	0.00498008	0.00498008		0.9999	185	0.000323916	184.999	0.000647833	185	3.5018e-06	3.50275e-06
		0.8938	4006	11	3995	22	4017	0.00547672	0.00547672		0.9999	186	0.000325668	185.999	0.000651335	186	3.5018e-06	3.50275e-06
		0.8916	4006	12	3994	24	4018	0.00597312	0.00597163		0.9999	187	0.000327419	186.999	0.000654837	187	3.5018e-06	3.50275e-06
		0.8913	4007	12	3995	24	4019	0.00597163	0.00597163		0.9999	188	0.00032917	187.999	0.000658339	188	3.50181e-06	3.50275e-06
		0.8911	4007	13	3994	26	4020	0.00646766	0.00646766		0.9999	189	0.000330921	188.999	0.000661842	189	3.50181e-06	3.50275e-06
		0.8876	4007	14	3993	28	4021	0.00696344	0.00696344		0.9999	190	0.000332672	189.999	0.000665344	190	3.50181e-06	3.50275e-06
		0.887	4010	19	3991	38	4029	0.00943162	0.00931829		0.9999	191	0.000334423	190.999	0.000668846	191	3.50181e-06	3.50275e-06
		0.8868	4059	19	4040	38	4078	0.00931829	0.00931829		0.9999	192	0.000336174	191.999	0.000672348	192	3.50181e-06	3.50275e-06
		0.8864	4092	20	4072	40	4112	0.00972763	0.00972053		0.9999	193	0.000337925	192.999	0.00067585	193	3.50182e-06	3.50275e-06
		0.8828	4093	20	4073	40	4113	0.00972526	0.00972053		0.9999	194	0.000339676	193.999	0.000679353	194	3.50182e-06	3.50275e-06
		0.8825	4094	20	4074	40	4114	0.0097229	0.00972053		0.9999	195	0.000341427	194.999	0.000682855	195	3.50182e-06	3.50275e-06
		0.8822	4095	20	4075	40	4115	0.00972053	0.00972053		0.9999	196	0.000343179	195.999	0.000686357	196	3.50182e-06	3.50275e-06
		0.8785	4101	21	4080	42	4122	0.0101892	0.0101892		0.9999	197	0.00034493	196.999	0.000689859	197	3.50182e-06	3.50275e-06
		0.8773	4142	22	4120	44	4164	0.0105668	0.0105012		0.9999	198	0.000346681	197.999	0.000693362	198	3.50183e-06	3.50275e-06
		0.8765	4143	22	4121	44	4165	0.0105642	0.0105012		0.9999	199	0.000348432	198.999	0.000696864	199	3.50183e-06	3.50275e-06
		0.876	4144	22	4122	44	4166	0.0105617	0.0105012		0.9999	200	0.000350183	199.999	0.000700366	200	3.50183e-06	3.50275e-06
		0.874	4145	22	4123	44	4167	0.0105592	0.0105012		0.9999	201	0.000351934	200.999	0.000703868	201	3.50183e-06	3.50275e-06
		0.8723	4146	22	4124	44	4168	0.0105566	0.0105012		0.9999	202	0.000353685	201.999	0.000707371	202	3.50184e-06	3.50275e-06
		0.8715	4168	22	4146	44	4190	0.0105012	0.0105012		0.9999	203	0.000355436	202.999	0.000710873	203	3.50184e-06	3.50275e-06
		0.8694	4174	23	4151	46	4197	0.0109602	0.0108824		0.9999	204	0.000357188	203.999	0.000714375	204	3.50184e-06	3.50275e-06
		0.8691	4176	23	4153	46	4199	0.010955	0.0108824		0.9999	205	0.000358939	204.999	0.000717878	205	3.50184e-06	3.50275e-06
		0.8671	4201	23	4178	46	4224	0.0108902	0.0108824		0.9999	206	0.00036069	205.999	0.00072138	206	3.50184e-06	3.50275e-06
		0.8666	4202	23	4179	46	4225	0.0108876	0.0108824		0.9999	207	0.000362441	206.999	0.000724882	207	3.50185e-06	3.50275e-06
		0.8662	4203	23	4180	46	4226	0.010885	0.0108824		0.9999	208	0.000364192	207.999	0.000728384	208	3.50185e-06	3.50275e-06
		0.8647	4204	23	4181	46	4227	0.0108824	0.0108824		0.9999	209	0.000365943	208.999	0.000731887	209	3.50185e-06	3.50275e-06
		0.8643	4204	24	4180	48	4228	0.0113529	0.0113261		0.9999	210	0.000367694	209.999	0.000735389	210	3.50185e-06	3.50275e-06
		0.863	4205	24	4181	48	4229	0.0113502	0.0113261		0.9999	211	0.000369446	210.999	0.000738891	211	3.50185e-06	3.50275e-06
		0.8617	4206	24	4182	48	4230	0.0113475	0.0113261		0.9999	212	0.000371197	211.999	0.000742394	212	3.50186e-06	3.50275e-06
		0.8607	4214	24	4190	48	4238	0.0113261	0.0113261		0.9999	213	0.000372948	212.999	0.000745896	213	3.50186e-06	3.50275e-06
		0.8598	4217	25	4192	50	4242	0.0117869	0.011773		0.9999	214	0.000374699	213.999	0.000749398	214	3.50186e-06	3.50275e-06
		0.8597	4220	25	4195	50	4245	0.0117786	0.011773		0.9999	215	0.00037645	214.999	0.0007529	215	3.50186e-06	3.50275e-06
		0.858	4221	25	4196	50	4246	0.0117758	0.011773		0.9999	216	0.000378201	215.999	0.000756403	216	3.50186e-06	3.50275e-06
		0.8566	4222	25	4197	50	4247	0.011773	0.011773		0.9999	217	0.000379953	216.999	0.000759905	217	3.50187e-06	3.50275e-06
		0.856	4273	27	4246	54	4300	0.0125581	0.0124913		0.9999	218	0.000381704	217.999	0.000763407	218	3.50187e-06	3.50275e-06
		0.8547	4274	27	4247	54	4301	0.0125552	0.0124913		0.9999	219	0.000383455	218.999	0.00076691	219	3.50187e-06	3.50275e-06
		0.8509	4277	27	4250	54	4304	0.0125465	0.0124913		0.9999	220	0.000385206	219.999	0.000770412	220	3.50187e-06	3.50275e-06
		0.8502	4278	27	4251	54	4305	0.0125436	0.0124913		0.9999	221	0.000386957	220.999	0.000773914	221	3.50188e-06	3.50275e-06
		0.8497	4279	27	4252	54	4306	0.0125406	0.0124913		0.9999	222	0.000388708	221.999	0.000777417	222	3.50188e-06	3.50275e-06
		0.849	4280	27	4253	54	4307	0.0125377	0.0124913		0.9999	223	0.00039046	222.999	0.000780919	223	3.50188e-06	3.50275e-06
		0.8483	4281	27	4254	54	4308	0.0125348	0.0124913		0.9999	224	0.000392211	223.999	0.000784422	224	3.50188e-06	3.50275e-06
		0.8477	4291	27	4264	54	4318	0.0125058	0.0124913		0.9999	225	0.000393962	224.999	0.000787924	225	3.50188e-06	3.50275e-06
		0.8442	4295	27	4268	54	4322	0.0124942	0.0124913		0.9999	226	0.000395713	225.999	0.000791426	226	3.50189e-06	3.50275e-06
		0.8441	4296	27	4269	54	4323	0.0124913	0.0124913		0.9999	227	0.000397464	226.999	0.000794929	227	3.50189e-06	3.50275e-06
		0.8438	4296	28	4268	56	4324	0.012951	0.0128529		0.9999	228	0.000399216	227.999	0.000798431	228	3.50189e-06	3.50275e-06
		0.8431	4297	28	4269	56	4325	0.012948	0.0128529		0.9999	229	0.000400967	228.999	0.000801933	229	3.50189e-06	3.50275e-06
		0.8421	4313	28	4285	56	4341	0.0129003	0.0128529		0.9999	230	0.000402718	229.999	0.000805436	230	3.50189e-06	3.50275e-06
		0.8386	4316	28	4288	56	4344	0.0128913	0.0128529		0.9999	231	0.000404469	230.999	0.000808938	231	3.5019e-06	3.50275e-06
		0.8379	4317	28	4289	56	4345	0.0128884	0.0128529		0.9999	232	0.00040622	231.999	0.000812441	232	3.5019e-06	3.50275e-06
		0.8334	4318	28	4290	56	4346	0.0128854	0.0128529		0.9999	233	0.000407971	232.999	0.000815943	233	3.5019e-06	3.50275e-06
		0.8329	4319	28	4291	56	4347	0.0128824	0.0128529		0.9999	234	0.000409723	233.999	0.000819445	234	3.5019e-06	3.50275e-06
		0.8315	4329	28	4301	56	4357	0.0128529	0.0128529		0.9999	235	0.000411474	234.999	0.000822948	235	3.50191e-06	3.50275e-06
		0.8271	4336	30	4306	60	4366	0.0137426	0.0137426		0.9999	236	0.000413225	235.999	0.00082645	236	3.50191e-06	3.50275e-06
		0.8248	4342	31	4311	62	4373	0.0141779	0.0141714		0.9999	237	0.000414976	236.999	0.000829953	237	3.50191e-06	3.50275e-06
		0.8218	4343	31	4312	62	4374	0.0141747	0.0141714		0.9999	238	0.000416727	237.999	0.000833455	238	3.50191e-06	3.50275e-06
		0.8211	4344	31	4313	62	4375	0.0141714	0.0141714		0.9999	239	0.000418479	238.999	0.000836957	239	3.50191e-06	3.50275e-06
		0.8183	4344	32	4312	64	4376	0.0146252	0.0145421		0.9999	240	0.00042023	239.999	0.00084046	240	3.50192e-06	3.50275e-06
		0.8179	4369	32	4337	64	4401	0.0145421	0.0145421		0.9999	241	0.000421981	240.999	0.000843962	241	3.50192e-06	3.50275e-06
		0.8149	4374	33	4341	66	4407	0.0149762	0.014922		0.9999	242	0.000423732	241.999	0.000847465	242	3.50192e-06	3.50275e-06
		0.8136	4375	33	4342	66	4408	0.0149728	0.014922		0.9999	243	0.000425484	242.999	0.000850967	243	3.50192e-06	3.50275e-06
		0.8117	4379	33	4346	66	4412	0.0149592	0.014922		0.9999	244	0.000427235	243.999	0.00085447	244	3.50192e-06	3.50275e-06
		0.8107	4380	33	4347	66	4413	0.0149558	0.014922		0.9999	245	0.000428986	244.999	0.000857972	245	3.50193e-06	3.50275e-06
		0.8092	4390	33	4357	66	4423	0.014922	0.014922		0.9999	246	0.000430737	245.999	0.000861474	246	3.50193e-06	3.50275e-06
		0.8086	4390	34	4356	68	4424	0.0153707	0.0153326		0.9999	247	0.000432488	246.999	0.000864977	247	3.50193e-06	3.50275e-06
		0.807	4391	34	4357	68	4425	0.0153672	0.0153326		0.9999	248	0.00043424	247.999	0.000868479	248	3.50193e-06	3.50275e-06
[truncated: 9,674 more rows]

## Sheet: Search Summary
	ProteinPilot™ Software Report
[truncated: 41 more rows]

## Sheet: Advanced Metadata
	Advanced Metadata
[truncated: 146 more rows]

## Sheet: Speed and Distribution Analysis
		Duration				Clock Rates			CPU Rates			Extent of Search Distribution
[truncated: 10 more rows]

[truncated: 10 more sheets: Single Results Table, Protein FDR Summary, Distinct Peptide FDR Summary, Spectrum FDR Summary, PDST Controls, Protein Summary, Peptide Summary, Distinct Peptide Summary, Feature Summary, Single Column Summary]
