# Supplementary material for: In vivo proteomic mapping through GFP-directed proximity-dependent biotin labelling in zebrafish
Source: eLife. 2021 Feb 16;10:e64631. doi: 10.7554/eLife.64631 (PMC7906605; doi:10.7554/eLife.64631)
Supplement: Figure 5—source data 4. [file elife-64631-fig5-data4.xlsx]

## Sheet: Metadata
_RESULTS_version	5
RESULTS_SEARCH_STAT_search_begin_time_clock	01/19/2021 16:09:14
RESULTS_SEARCH_STAT_search_end_time_clock	01/20/2021 19:26:40
RESULTS_SEARCH_STAT_search_time_duration	#VALUE!
RESULTS_SEARCH_STAT_stage_signal_processing_begin_time_clock	01/19/2021 16:09:15
RESULTS_SEARCH_STAT_stage_signal_processing_end_time_clock	01/20/2021 16:35:01
RESULTS_SEARCH_STAT_stage_signal_processing_time_duration	#VALUE!
RESULTS_SEARCH_STAT_stage_waiting_begin_time_clock	01/20/2021 16:35:01
RESULTS_SEARCH_STAT_stage_waiting_end_time_clock	01/20/2021 16:38:01
RESULTS_SEARCH_STAT_stage_waiting_time_duration	2393-06-16
RESULTS_SEARCH_STAT_stage_searching_begin_time_clock	01/20/2021 16:38:01
RESULTS_SEARCH_STAT_stage_searching_end_time_clock	01/20/2021 19:24:28
RESULTS_SEARCH_STAT_stage_searching_time_duration	#VALUE!
RESULTS_SEARCH_STAT_stage_fdr_begin_time_clock	01/20/2021 19:24:28
RESULTS_SEARCH_STAT_stage_fdr_end_time_clock	01/20/2021 19:26:40
RESULTS_SEARCH_STAT_stage_fdr_time_duration	2259-07-21
RESULTS_SEARCH_STAT_task_fraglet_exe_begin_time_clock	01/20/2021 17:52:26
RESULTS_SEARCH_STAT_task_fraglet_exe_end_time_clock	01/20/2021 18:31:27
RESULTS_SEARCH_STAT_task_fraglet_exe_time_duration	2340994
RESULTS_SEARCH_STAT_task_fraglet_exe_time_cpu	#VALUE!
RESULTS_SEARCH_STAT_task_taglet_exe_begin_time_clock	01/20/2021 18:37:17
RESULTS_SEARCH_STAT_task_taglet_exe_end_time_clock	01/20/2021 19:13:04
RESULTS_SEARCH_STAT_task_taglet_exe_time_duration	2147157
RESULTS_SEARCH_STAT_task_taglet_exe_time_cpu	#VALUE!
RESULTS_SEARCH_STAT_task_progroup_begin_time_clock	01/20/2021 19:13:04
RESULTS_SEARCH_STAT_task_progroup_end_time_clock	01/20/2021 19:24:28
RESULTS_SEARCH_STAT_task_progroup_time_duration	683571
RESULTS_SEARCH_STAT_task_progroup_time_cpu	3844-12-14
RESULTS_SEARCH_STAT_task_focusing_begin_time_clock	01/20/2021 18:31:27
RESULTS_SEARCH_STAT_task_focusing_end_time_clock	01/20/2021 18:37:17
RESULTS_SEARCH_STAT_task_focusing_time_duration	349562
RESULTS_SEARCH_STAT_task_focusing_time_cpu	393262
RESULTS_SEARCH_STAT_computer_memory	32767
RESULTS_SEARCH_STAT_computer_name	IMB-MASS02
RESULTS_SEARCH_STAT_num_proteins	150424
RESULTS_SEARCH_STAT_num_residues	75708562
RESULTS_SEARCH_STAT_number_cores	8
RESULTS_SEARCH_STAT_number_licensed_tasks	16
RESULTS_SEARCH_STAT_number_processors	8
RESULTS_SEARCH_STAT_os	Windows Server 2008 R2 Standard (6.1.7600)
RESULTS_SEARCH_1_time_cpu	189931
RESULTS_SEARCH_1_time_duration	189984
RESULTS_SEARCH_1_version	5.0.1.4874
RESULTS_SEARCH_1_xml:id	SEARCH:1:637466693437157084_0
RESULTS_SEARCH_1_PARAMETERS_chemical_data_edited	FALSE
RESULTS_SEARCH_1_PARAMETERS_do_multiprecursor_search	TRUE
RESULTS_SEARCH_1_PARAMETERS_do_reverse_search	TRUE
RESULTS_SEARCH_1_PARAMETERS_max_quant_labels	35
RESULTS_SEARCH_1_PARAMETERS_maxresults	15
RESULTS_SEARCH_1_PARAMETERS_separate_searches	FALSE
RESULTS_SEARCH_1_PARAMETERS_MSTOLERANCE_type	dalton
RESULTS_SEARCH_1_PARAMETERS_MSTOLERANCE_value	0.05
RESULTS_SEARCH_1_PARAMETERS_MSMSTOLERANCE_type	dalton
RESULTS_SEARCH_1_PARAMETERS_MSMSTOLERANCE_value	0.1
RESULTS_SEARCH_1_PARAMETERS_MS_STANDARD_DEVIATION_type	dalton
RESULTS_SEARCH_1_PARAMETERS_MS_STANDARD_DEVIATION_value	0.0011
RESULTS_SEARCH_1_PARAMETERS_MSMS_STANDARD_DEVIATION_type	dalton
RESULTS_SEARCH_1_PARAMETERS_MSMS_STANDARD_DEVIATION_value	0.01
RESULTS_SEARCH_1_PARAMETERS_FASTA_filename	C:\AB SCIEX\ProteinPilot Data\SearchDatabases\uniprot-zebrafish_with_Clover.fasta
RESULTS_SEARCH_1_PARAMETERS_AUTO_CALIBRATION_ms	TRUE
RESULTS_SEARCH_1_PARAMETERS_AUTO_CALIBRATION_msexport	FALSE
RESULTS_SEARCH_1_PARAMETERS_AUTO_CALIBRATION_msms	TRUE
RESULTS_SEARCH_1_PARAMETERS_AUTO_CALIBRATION_msmstolsdratio	2.75
RESULTS_SEARCH_1_PARAMETERS_AUTO_CALIBRATION_mstolsdratio	7
RESULTS_SEARCH_1_PARAMETERS_AUTO_CALIBRATION_squareroot	TRUE
RESULTS_SEARCH_1_PARAMETERS_AUTO_CALIBRATION_type	dalton
RESULTS_SEARCH_1_PARAMETERS_AUTO_CALIBRATION_MCP_d_s_s_f	0.0666667
RESULTS_SEARCH_1_PARAMETERS_AUTO_CALIBRATION_MCP_d_s_w_f	3
RESULTS_SEARCH_1_PARAMETERS_AUTO_CALIBRATION_MCP_m_f_r_mbc	200
RESULTS_SEARCH_1_PARAMETERS_AUTO_CALIBRATION_MCP_m_m_c	10
RESULTS_SEARCH_1_PARAMETERS_AUTO_CALIBRATION_MCP_m_m_f_s	0.25
RESULTS_SEARCH_1_PARAMETERS_AUTO_CALIBRATION_MCP_m_m_p_f	0.33
RESULTS_SEARCH_1_PARAMETERS_AUTO_CALIBRATION_MCP_m_m_p_rms_f	1
RESULTS_SEARCH_1_PARAMETERS_AUTO_CALIBRATION_MCP_m_p_t_f	1
RESULTS_SEARCH_1_PARAMETERS_AUTO_CALIBRATION_MCP_m_r_h_n_b	15
RESULTS_SEARCH_1_PARAMETERS_AUTO_CALIBRATION_MCP_m_z_n_s	99
RESULTS_SEARCH_1_PARAMETERS_AUTO_CALIBRATION_MCP_m_z_s_mn_f_r	0.0666667
RESULTS_SEARCH_1_PARAMETERS_AUTO_CALIBRATION_MCP_m_z_s_mx_f_r	0.1
RESULTS_SEARCH_1_PARAMETERS_MS_AUTO_CALIBRATION_OUT_avres	5.19451e-10
RESULTS_SEARCH_1_PARAMETERS_MS_AUTO_CALIBRATION_OUT_c0	0.000297403
RESULTS_SEARCH_1_PARAMETERS_MS_AUTO_CALIBRATION_OUT_c1minus1	-1.39918e-05
RESULTS_SEARCH_1_PARAMETERS_MS_AUTO_CALIBRATION_OUT_c2	0
RESULTS_SEARCH_1_PARAMETERS_MS_AUTO_CALIBRATION_OUT_file	1
RESULTS_SEARCH_1_PARAMETERS_MS_AUTO_CALIBRATION_OUT_partnumber	1
RESULTS_SEARCH_1_PARAMETERS_MS_AUTO_CALIBRATION_OUT_polyorder	1
RESULTS_SEARCH_1_PARAMETERS_MS_AUTO_CALIBRATION_OUT_sample	1
RESULTS_SEARCH_1_PARAMETERS_MS_AUTO_CALIBRATION_OUT_squareroot	TRUE
RESULTS_SEARCH_1_PARAMETERS_MSMS_AUTO_CALIBRATION_OUT_avres	-2.67307e-08
RESULTS_SEARCH_1_PARAMETERS_MSMS_AUTO_CALIBRATION_OUT_c0	-5.8075e-06
RESULTS_SEARCH_1_PARAMETERS_MSMS_AUTO_CALIBRATION_OUT_c1minus1	-1.15767e-06
RESULTS_SEARCH_1_PARAMETERS_MSMS_AUTO_CALIBRATION_OUT_c2	0
RESULTS_SEARCH_1_PARAMETERS_MSMS_AUTO_CALIBRATION_OUT_file	1
RESULTS_SEARCH_1_PARAMETERS_MSMS_AUTO_CALIBRATION_OUT_partnumber	1
RESULTS_SEARCH_1_PARAMETERS_MSMS_AUTO_CALIBRATION_OUT_polyorder	1
RESULTS_SEARCH_1_PARAMETERS_MSMS_AUTO_CALIBRATION_OUT_sample	1
RESULTS_SEARCH_1_PARAMETERS_MSMS_AUTO_CALIBRATION_OUT_squareroot	TRUE
RESULTS_SEARCH_1_PARAMETERS_MAX_PRECURSORS_FRAGLET	5
RESULTS_SEARCH_1_PARAMETERS_MAX_PRECURSORS_TAGLET	1
RESULTS_SEARCH_1_PARAMETERS_PRECURSORS_DR_FRAGLET	10
RESULTS_SEARCH_1_PARAMETERS_PRECURSORS_DR_TAGLET	3
RESULTS_SEARCH_1_PARAMETERS_DEFAULT_CHARGE_STATE_1_charge	2
RESULTS_SEARCH_1_PARAMETERS_DEFAULT_CHARGE_STATE_1_probability	1
RESULTS_SEARCH_1_PARAMETERS_DEFAULT_CHARGE_STATE_2_charge	3
RESULTS_SEARCH_1_PARAMETERS_DEFAULT_CHARGE_STATE_2_probability	1
RESULTS_SEARCH_1_PARAMETERS_DEFAULT_CHARGE_STATE_3_charge	4
RESULTS_SEARCH_1_PARAMETERS_DEFAULT_CHARGE_STATE_3_probability	1
RESULTS_SEARCH_1_PARAMETERS_VERSION	5.0.1.0, 4895
RESULTS_SEARCH_1_PARAMETERS_PARAGON_VERSION	5.0.1.0, 4874
RESULTS_SEARCH_1_PARAMETERS_APPLICATION	ProteinPilot(tm) Software
RESULTS_SEARCH_1_PARAMETERS_PROGROUP_alternativedispositionmaximumfoldprobabilitydrop	100
RESULTS_SEARCH_1_PARAMETERS_PROGROUP_alternativedispositionmaximumfoldscoredrop	2
RESULTS_SEARCH_1_PARAMETERS_PROGROUP_autodiscordantpeptidethreshold	0.3
RESULTS_SEARCH_1_PARAMETERS_PROGROUP_bayesconfidencecalclulation	TRUE
RESULTS_SEARCH_1_PARAMETERS_PROGROUP_calibrateconfidence	TRUE
RESULTS_SEARCH_1_PARAMETERS_PROGROUP_compresspeptides	FALSE
RESULTS_SEARCH_1_PARAMETERS_PROGROUP_confidencepercentthresholdforexcludingothersfromquant	15
RESULTS_SEARCH_1_PARAMETERS_PROGROUP_confidencepercentthresholdforincludingselfinquant	15
RESULTS_SEARCH_1_PARAMETERS_PROGROUP_donotstoremspeaklists	FALSE
RESULTS_SEARCH_1_PARAMETERS_PROGROUP_fasta	C:\AB SCIEX\ProteinPilot Data\SearchDatabases\uniprot-zebrafish_with_Clover.fasta
RESULTS_SEARCH_1_PARAMETERS_PROGROUP_featuregroupminpepconf	0.66
RESULTS_SEARCH_1_PARAMETERS_PROGROUP_featuregroupminups	0.47
RESULTS_SEARCH_1_PARAMETERS_PROGROUP_focusingintersection	4
RESULTS_SEARCH_1_PARAMETERS_PROGROUP_focusingminimummatchconfidence	0.1
RESULTS_SEARCH_1_PARAMETERS_PROGROUP_focusingminunusedprotscore	0.1
RESULTS_SEARCH_1_PARAMETERS_PROGROUP_focusingsubsetcutoff	6
RESULTS_SEARCH_1_PARAMETERS_PROGROUP_intersection	1.3
RESULTS_SEARCH_1_PARAMETERS_PROGROUP_minimummatchconfidencecutoff	0.001
RESULTS_SEARCH_1_PARAMETERS_PROGROUP_minunusedprotscore	0.0458
RESULTS_SEARCH_1_PARAMETERS_PROGROUP_subsetcutoff	2
RESULTS_SEARCH_1_PARAMETERS_PROGROUP_unusedprotscorethresholdforexcludingothersfromquant	1.3
RESULTS_SEARCH_1_PARAMETERS_PEAKLIST_count	1909-03-14
RESULTS_SEARCH_1_PARAMETERS_PEAKLIST_filenumber	1
RESULTS_SEARCH_1_PARAMETERS_PEAKLIST_original_count	3361
RESULTS_SEARCH_1_PARAMETERS_PEAKLIST_originalfilename	C:\AB SCIEX\ProteinPilot Data\Results\Albert\ZX 20200624 6600\ZX 20200624 C4A Control 1.wiff
RESULTS_SEARCH_1_PARAMETERS_PEAKLIST_partnumber	1
RESULTS_SEARCH_1_PARAMETERS_QUANT_TYPE_background_correction	FALSE
RESULTS_SEARCH_1_PARAMETERS_QUANT_TYPE_bias_correction	TRUE
RESULTS_SEARCH_1_PARAMETERS_QUANT_TYPE_keep_extreme_peptides_over_fraction	0
RESULTS_SEARCH_1_PARAMETERS_QUANT_TYPE_low_confidence_check	TRUE
RESULTS_SEARCH_1_PARAMETERS_QUANT_TYPE_low_intensity_check	TRUE
RESULTS_SEARCH_1_PARAMETERS_QUANT_TYPE_median_statistic	TRUE
RESULTS_SEARCH_1_PARAMETERS_QUANT_TYPE_mod_check	TRUE
RESULTS_SEARCH_1_PARAMETERS_QUANT_TYPE_quant_threshold	-1
RESULTS_SEARCH_1_PARAMETERS_QUANT_TYPE_quant_threshold_sn	9
RESULTS_SEARCH_1_PARAMETERS_QUANT_TYPE_separate_searches	FALSE
RESULTS_SEARCH_1_PARAMETERS_QUANT_TYPE_shared_msms_check	TRUE
RESULTS_SEARCH_1_PARAMETERS_PARAGON_METHOD_SETTINGS_UI_SAMPLE_TYPE	Identification
RESULTS_SEARCH_1_PARAMETERS_PARAGON_METHOD_SETTINGS_UI_CYS_ALKYLATION	Iodoacetamide w other Cys mods possible
RESULTS_SEARCH_1_PARAMETERS_PARAGON_METHOD_SETTINGS_UI_DIGESTION	Trypsin + Lys C
RESULTS_SEARCH_1_PARAMETERS_PARAGON_METHOD_SETTINGS_UI_SPECIAL_FACTOR	Gel-based ID
RESULTS_SEARCH_1_PARAMETERS_PARAGON_METHOD_SETTINGS_UI_INSTRUMENT	TripleTOF 6600
RESULTS_SEARCH_1_PARAMETERS_PARAGON_METHOD_SETTINGS_UI_SEARCH_EFFORT	Thorough
RESULTS_SEARCH_1_PARAMETERS_PARAGON_METHOD_SETTINGS_UI_USER_NAME	IMB-MASS02\massuser
RESULTS_SEARCH_1_PARAMETERS_PARAGON_METHOD_SETTINGS_UI_MACHINE_NAME	IMB-MASS02
RESULTS_SEARCH_1_PARAMETERS_PARAGON_METHOD_SETTINGS_UI_SEARCH_ID	6.37467e+17
RESULTS_SEARCH_1_PARAMETERS_PARAGON_METHOD_SETTINGS_UI_START_TIME	2021-01-19 16:09:14
RESULTS_SEARCH_1_PARAMETERS_PARAGON_METHOD_SETTINGS_UI_MIN_UNUSED_PROTSCORE	0.0458
RESULTS_SEARCH_1_PARAMETERS_PARAGON_METHOD_SETTINGS_UI_PSPEP	TRUE
RESULTS_SEARCH_2_time_cpu	347960
RESULTS_SEARCH_2_time_duration	348392
RESULTS_SEARCH_2_version	5.0.1.4874
RESULTS_SEARCH_2_xml:id	SEARCH:2:637466693437157084_0
RESULTS_SEARCH_2_PARAMETERS_chemical_data_edited	FALSE
RESULTS_SEARCH_2_PARAMETERS_do_multiprecursor_search	TRUE
RESULTS_SEARCH_2_PARAMETERS_do_reverse_search	TRUE
RESULTS_SEARCH_2_PARAMETERS_max_quant_labels	35
RESULTS_SEARCH_2_PARAMETERS_maxresults	15
RESULTS_SEARCH_2_PARAMETERS_separate_searches	FALSE
RESULTS_SEARCH_2_PARAMETERS_MSTOLERANCE_type	dalton
RESULTS_SEARCH_2_PARAMETERS_MSTOLERANCE_value	0.05
RESULTS_SEARCH_2_PARAMETERS_MSMSTOLERANCE_type	dalton
RESULTS_SEARCH_2_PARAMETERS_MSMSTOLERANCE_value	0.1
RESULTS_SEARCH_2_PARAMETERS_MS_STANDARD_DEVIATION_type	dalton
RESULTS_SEARCH_2_PARAMETERS_MS_STANDARD_DEVIATION_value	0.0011
RESULTS_SEARCH_2_PARAMETERS_MSMS_STANDARD_DEVIATION_type	dalton
RESULTS_SEARCH_2_PARAMETERS_MSMS_STANDARD_DEVIATION_value	0.01
RESULTS_SEARCH_2_PARAMETERS_FASTA_filename	C:\AB SCIEX\ProteinPilot Data\SearchDatabases\uniprot-zebrafish_with_Clover.fasta
RESULTS_SEARCH_2_PARAMETERS_AUTO_CALIBRATION_ms	TRUE
RESULTS_SEARCH_2_PARAMETERS_AUTO_CALIBRATION_msexport	FALSE
RESULTS_SEARCH_2_PARAMETERS_AUTO_CALIBRATION_msms	TRUE
RESULTS_SEARCH_2_PARAMETERS_AUTO_CALIBRATION_msmstolsdratio	2.75
RESULTS_SEARCH_2_PARAMETERS_AUTO_CALIBRATION_mstolsdratio	7
RESULTS_SEARCH_2_PARAMETERS_AUTO_CALIBRATION_squareroot	TRUE
RESULTS_SEARCH_2_PARAMETERS_AUTO_CALIBRATION_type	dalton
RESULTS_SEARCH_2_PARAMETERS_AUTO_CALIBRATION_MCP_d_s_s_f	0.0666667
RESULTS_SEARCH_2_PARAMETERS_AUTO_CALIBRATION_MCP_d_s_w_f	3
RESULTS_SEARCH_2_PARAMETERS_AUTO_CALIBRATION_MCP_m_f_r_mbc	200
RESULTS_SEARCH_2_PARAMETERS_AUTO_CALIBRATION_MCP_m_m_c	10
RESULTS_SEARCH_2_PARAMETERS_AUTO_CALIBRATION_MCP_m_m_f_s	0.25
RESULTS_SEARCH_2_PARAMETERS_AUTO_CALIBRATION_MCP_m_m_p_f	0.33
RESULTS_SEARCH_2_PARAMETERS_AUTO_CALIBRATION_MCP_m_m_p_rms_f	1
RESULTS_SEARCH_2_PARAMETERS_AUTO_CALIBRATION_MCP_m_p_t_f	1
RESULTS_SEARCH_2_PARAMETERS_AUTO_CALIBRATION_MCP_m_r_h_n_b	15
RESULTS_SEARCH_2_PARAMETERS_AUTO_CALIBRATION_MCP_m_z_n_s	99
RESULTS_SEARCH_2_PARAMETERS_AUTO_CALIBRATION_MCP_m_z_s_mn_f_r	0.0666667
RESULTS_SEARCH_2_PARAMETERS_AUTO_CALIBRATION_MCP_m_z_s_mx_f_r	0.1
RESULTS_SEARCH_2_PARAMETERS_MS_AUTO_CALIBRATION_OUT_avres	5.19451e-10
RESULTS_SEARCH_2_PARAMETERS_MS_AUTO_CALIBRATION_OUT_c0	0.000297403
RESULTS_SEARCH_2_PARAMETERS_MS_AUTO_CALIBRATION_OUT_c1minus1	-1.39918e-05
RESULTS_SEARCH_2_PARAMETERS_MS_AUTO_CALIBRATION_OUT_c2	0
RESULTS_SEARCH_2_PARAMETERS_MS_AUTO_CALIBRATION_OUT_file	1
RESULTS_SEARCH_2_PARAMETERS_MS_AUTO_CALIBRATION_OUT_partnumber	1900-01-01
RESULTS_SEARCH_2_PARAMETERS_MS_AUTO_CALIBRATION_OUT_polyorder	1
RESULTS_SEARCH_2_PARAMETERS_MS_AUTO_CALIBRATION_OUT_sample	1
RESULTS_SEARCH_2_PARAMETERS_MS_AUTO_CALIBRATION_OUT_squareroot	TRUE
RESULTS_SEARCH_2_PARAMETERS_MSMS_AUTO_CALIBRATION_OUT_avres	-2.67307e-08
RESULTS_SEARCH_2_PARAMETERS_MSMS_AUTO_CALIBRATION_OUT_c0	-5.8075e-06
RESULTS_SEARCH_2_PARAMETERS_MSMS_AUTO_CALIBRATION_OUT_c1minus1	-1.15767e-06
RESULTS_SEARCH_2_PARAMETERS_MSMS_AUTO_CALIBRATION_OUT_c2	0
RESULTS_SEARCH_2_PARAMETERS_MSMS_AUTO_CALIBRATION_OUT_file	1
RESULTS_SEARCH_2_PARAMETERS_MSMS_AUTO_CALIBRATION_OUT_partnumber	1
RESULTS_SEARCH_2_PARAMETERS_MSMS_AUTO_CALIBRATION_OUT_polyorder	1
RESULTS_SEARCH_2_PARAMETERS_MSMS_AUTO_CALIBRATION_OUT_sample	1
RESULTS_SEARCH_2_PARAMETERS_MSMS_AUTO_CALIBRATION_OUT_squareroot	TRUE
RESULTS_SEARCH_2_PARAMETERS_MAX_PRECURSORS_FRAGLET	5
RESULTS_SEARCH_2_PARAMETERS_MAX_PRECURSORS_TAGLET	1
RESULTS_SEARCH_2_PARAMETERS_PRECURSORS_DR_FRAGLET	10
RESULTS_SEARCH_2_PARAMETERS_PRECURSORS_DR_TAGLET	3
RESULTS_SEARCH_2_PARAMETERS_DEFAULT_CHARGE_STATE_1_charge	2
RESULTS_SEARCH_2_PARAMETERS_DEFAULT_CHARGE_STATE_1_probability	1
RESULTS_SEARCH_2_PARAMETERS_DEFAULT_CHARGE_STATE_2_charge	3
RESULTS_SEARCH_2_PARAMETERS_DEFAULT_CHARGE_STATE_2_probability	1
RESULTS_SEARCH_2_PARAMETERS_DEFAULT_CHARGE_STATE_3_charge	4
RESULTS_SEARCH_2_PARAMETERS_DEFAULT_CHARGE_STATE_3_probability	1
RESULTS_SEARCH_2_PARAMETERS_VERSION	5.0.1.0, 4895
RESULTS_SEARCH_2_PARAMETERS_PARAGON_VERSION	5.0.1.0, 4874
RESULTS_SEARCH_2_PARAMETERS_APPLICATION	ProteinPilot(tm) Software
RESULTS_SEARCH_2_PARAMETERS_PROGROUP_alternativedispositionmaximumfoldprobabilitydrop	100
RESULTS_SEARCH_2_PARAMETERS_PROGROUP_alternativedispositionmaximumfoldscoredrop	2
RESULTS_SEARCH_2_PARAMETERS_PROGROUP_autodiscordantpeptidethreshold	0.3
RESULTS_SEARCH_2_PARAMETERS_PROGROUP_bayesconfidencecalclulation	TRUE
RESULTS_SEARCH_2_PARAMETERS_PROGROUP_calibrateconfidence	TRUE
RESULTS_SEARCH_2_PARAMETERS_PROGROUP_compresspeptides	FALSE
RESULTS_SEARCH_2_PARAMETERS_PROGROUP_confidencepercentthresholdforexcludingothersfromquant	15
RESULTS_SEARCH_2_PARAMETERS_PROGROUP_confidencepercentthresholdforincludingselfinquant	15
RESULTS_SEARCH_2_PARAMETERS_PROGROUP_donotstoremspeaklists	FALSE
RESULTS_SEARCH_2_PARAMETERS_PROGROUP_fasta	C:\AB SCIEX\ProteinPilot Data\SearchDatabases\uniprot-zebrafish_with_Clover.fasta
RESULTS_SEARCH_2_PARAMETERS_PROGROUP_featuregroupminpepconf	0.66
RESULTS_SEARCH_2_PARAMETERS_PROGROUP_featuregroupminups	0.47
RESULTS_SEARCH_2_PARAMETERS_PROGROUP_focusingintersection	4
RESULTS_SEARCH_2_PARAMETERS_PROGROUP_focusingminimummatchconfidence	0.1
RESULTS_SEARCH_2_PARAMETERS_PROGROUP_focusingminunusedprotscore	0.1
RESULTS_SEARCH_2_PARAMETERS_PROGROUP_focusingsubsetcutoff	6
RESULTS_SEARCH_2_PARAMETERS_PROGROUP_intersection	1.3
RESULTS_SEARCH_2_PARAMETERS_PROGROUP_minimummatchconfidencecutoff	0.001
RESULTS_SEARCH_2_PARAMETERS_PROGROUP_minunusedprotscore	0.0458
RESULTS_SEARCH_2_PARAMETERS_PROGROUP_subsetcutoff	2
RESULTS_SEARCH_2_PARAMETERS_PROGROUP_unusedprotscorethresholdforexcludingothersfromquant	1.3
RESULTS_SEARCH_2_PARAMETERS_PEAKLIST_count	3361
RESULTS_SEARCH_2_PARAMETERS_PEAKLIST_filenumber	1
RESULTS_SEARCH_2_PARAMETERS_PEAKLIST_original_count	3361
RESULTS_SEARCH_2_PARAMETERS_PEAKLIST_originalfilename	C:\AB SCIEX\ProteinPilot Data\Results\Albert\ZX 20200624 6600\ZX 20200624 C4A Control 1.wiff
RESULTS_SEARCH_2_PARAMETERS_PEAKLIST_partnumber	1
RESULTS_SEARCH_2_PARAMETERS_QUANT_TYPE_background_correction	FALSE
RESULTS_SEARCH_2_PARAMETERS_QUANT_TYPE_bias_correction	TRUE
RESULTS_SEARCH_2_PARAMETERS_QUANT_TYPE_keep_extreme_peptides_over_fraction	0
RESULTS_SEARCH_2_PARAMETERS_QUANT_TYPE_low_confidence_check	TRUE
RESULTS_SEARCH_2_PARAMETERS_QUANT_TYPE_low_intensity_check	TRUE
RESULTS_SEARCH_2_PARAMETERS_QUANT_TYPE_median_statistic	TRUE
RESULTS_SEARCH_2_PARAMETERS_QUANT_TYPE_mod_check	TRUE
RESULTS_SEARCH_2_PARAMETERS_QUANT_TYPE_quant_threshold	-1
RESULTS_SEARCH_2_PARAMETERS_QUANT_TYPE_quant_threshold_sn	9
RESULTS_SEARCH_2_PARAMETERS_QUANT_TYPE_separate_searches	FALSE
RESULTS_SEARCH_2_PARAMETERS_QUANT_TYPE_shared_msms_check	TRUE
RESULTS_SEARCH_2_PARAMETERS_PARAGON_METHOD_SETTINGS_UI_SAMPLE_TYPE	Identification
RESULTS_SEARCH_2_PARAMETERS_PARAGON_METHOD_SETTINGS_UI_CYS_ALKYLATION	Iodoacetamide w other Cys mods possible
RESULTS_SEARCH_2_PARAMETERS_PARAGON_METHOD_SETTINGS_UI_DIGESTION	Trypsin + Lys C
RESULTS_SEARCH_2_PARAMETERS_PARAGON_METHOD_SETTINGS_UI_SPECIAL_FACTOR	Gel-based ID
RESULTS_SEARCH_2_PARAMETERS_PARAGON_METHOD_SETTINGS_UI_INSTRUMENT	TripleTOF 6600
RESULTS_SEARCH_2_PARAMETERS_PARAGON_METHOD_SETTINGS_UI_SEARCH_EFFORT	Thorough
RESULTS_SEARCH_2_PARAMETERS_PARAGON_METHOD_SETTINGS_UI_USER_NAME	IMB-MASS02\massuser
RESULTS_SEARCH_2_PARAMETERS_PARAGON_METHOD_SETTINGS_UI_MACHINE_NAME	IMB-MASS02
RESULTS_SEARCH_2_PARAMETERS_PARAGON_METHOD_SETTINGS_UI_SEARCH_ID	6.37467e+17
RESULTS_SEARCH_2_PARAMETERS_PARAGON_METHOD_SETTINGS_UI_START_TIME	2021-01-19 16:09:14
RESULTS_SEARCH_2_PARAMETERS_PARAGON_METHOD_SETTINGS_UI_MIN_UNUSED_PROTSCORE	0.0458
RESULTS_SEARCH_2_PARAMETERS_PARAGON_METHOD_SETTINGS_UI_PSPEP	TRUE
RESULTS_SEARCH_3_time_cpu	202130
RESULTS_SEARCH_3_time_duration	202214
RESULTS_SEARCH_3_version	5.0.1.4874
RESULTS_SEARCH_3_xml:id	SEARCH:1:637466693437157084_1
RESULTS_SEARCH_3_PARAMETERS_chemical_data_edited	FALSE
RESULTS_SEARCH_3_PARAMETERS_do_multiprecursor_search	TRUE
RESULTS_SEARCH_3_PARAMETERS_do_reverse_search	TRUE
RESULTS_SEARCH_3_PARAMETERS_max_quant_labels	35
RESULTS_SEARCH_3_PARAMETERS_maxresults	15
RESULTS_SEARCH_3_PARAMETERS_separate_searches	FALSE
RESULTS_SEARCH_3_PARAMETERS_MSTOLERANCE_type	dalton
RESULTS_SEARCH_3_PARAMETERS_MSTOLERANCE_value	0.05
RESULTS_SEARCH_3_PARAMETERS_MSMSTOLERANCE_type	dalton
RESULTS_SEARCH_3_PARAMETERS_MSMSTOLERANCE_value	0.1
RESULTS_SEARCH_3_PARAMETERS_MS_STANDARD_DEVIATION_type	dalton
RESULTS_SEARCH_3_PARAMETERS_MS_STANDARD_DEVIATION_value	0.0011
RESULTS_SEARCH_3_PARAMETERS_MSMS_STANDARD_DEVIATION_type	dalton
RESULTS_SEARCH_3_PARAMETERS_MSMS_STANDARD_DEVIATION_value	0.01
RESULTS_SEARCH_3_PARAMETERS_FASTA_filename	C:\AB SCIEX\ProteinPilot Data\SearchDatabases\uniprot-zebrafish_with_Clover.fasta
RESULTS_SEARCH_3_PARAMETERS_AUTO_CALIBRATION_ms	TRUE
RESULTS_SEARCH_3_PARAMETERS_AUTO_CALIBRATION_msexport	FALSE
RESULTS_SEARCH_3_PARAMETERS_AUTO_CALIBRATION_msms	TRUE
RESULTS_SEARCH_3_PARAMETERS_AUTO_CALIBRATION_msmstolsdratio	2.75
RESULTS_SEARCH_3_PARAMETERS_AUTO_CALIBRATION_mstolsdratio	7
RESULTS_SEARCH_3_PARAMETERS_AUTO_CALIBRATION_squareroot	TRUE
RESULTS_SEARCH_3_PARAMETERS_AUTO_CALIBRATION_type	dalton
RESULTS_SEARCH_3_PARAMETERS_AUTO_CALIBRATION_MCP_d_s_s_f	0.0666667
RESULTS_SEARCH_3_PARAMETERS_AUTO_CALIBRATION_MCP_d_s_w_f	3
RESULTS_SEARCH_3_PARAMETERS_AUTO_CALIBRATION_MCP_m_f_r_mbc	200
RESULTS_SEARCH_3_PARAMETERS_AUTO_CALIBRATION_MCP_m_m_c	10
RESULTS_SEARCH_3_PARAMETERS_AUTO_CALIBRATION_MCP_m_m_f_s	0.25
RESULTS_SEARCH_3_PARAMETERS_AUTO_CALIBRATION_MCP_m_m_p_f	0.33
RESULTS_SEARCH_3_PARAMETERS_AUTO_CALIBRATION_MCP_m_m_p_rms_f	1
RESULTS_SEARCH_3_PARAMETERS_AUTO_CALIBRATION_MCP_m_p_t_f	1
RESULTS_SEARCH_3_PARAMETERS_AUTO_CALIBRATION_MCP_m_r_h_n_b	15
RESULTS_SEARCH_3_PARAMETERS_AUTO_CALIBRATION_MCP_m_z_n_s	99
RESULTS_SEARCH_3_PARAMETERS_AUTO_CALIBRATION_MCP_m_z_s_mn_f_r	0.0666667
RESULTS_SEARCH_3_PARAMETERS_AUTO_CALIBRATION_MCP_m_z_s_mx_f_r	0.1
RESULTS_SEARCH_3_PARAMETERS_MS_AUTO_CALIBRATION_OUT_avres	-4.09123e-10
RESULTS_SEARCH_3_PARAMETERS_MS_AUTO_CALIBRATION_OUT_c0	0.000156909
RESULTS_SEARCH_3_PARAMETERS_MS_AUTO_CALIBRATION_OUT_c1minus1	-9.58469e-06
RESULTS_SEARCH_3_PARAMETERS_MS_AUTO_CALIBRATION_OUT_c2	0
RESULTS_SEARCH_3_PARAMETERS_MS_AUTO_CALIBRATION_OUT_file	2
RESULTS_SEARCH_3_PARAMETERS_MS_AUTO_CALIBRATION_OUT_partnumber	2
RESULTS_SEARCH_3_PARAMETERS_MS_AUTO_CALIBRATION_OUT_polyorder	1
RESULTS_SEARCH_3_PARAMETERS_MS_AUTO_CALIBRATION_OUT_sample	1
RESULTS_SEARCH_3_PARAMETERS_MS_AUTO_CALIBRATION_OUT_squareroot	TRUE
RESULTS_SEARCH_3_PARAMETERS_MSMS_AUTO_CALIBRATION_OUT_avres	-5.33631e-08
RESULTS_SEARCH_3_PARAMETERS_MSMS_AUTO_CALIBRATION_OUT_c0	-2.18284e-05
RESULTS_SEARCH_3_PARAMETERS_MSMS_AUTO_CALIBRATION_OUT_c1minus1	-1.12473e-06
RESULTS_SEARCH_3_PARAMETERS_MSMS_AUTO_CALIBRATION_OUT_c2	0
RESULTS_SEARCH_3_PARAMETERS_MSMS_AUTO_CALIBRATION_OUT_file	2
RESULTS_SEARCH_3_PARAMETERS_MSMS_AUTO_CALIBRATION_OUT_partnumber	2
RESULTS_SEARCH_3_PARAMETERS_MSMS_AUTO_CALIBRATION_OUT_polyorder	1
RESULTS_SEARCH_3_PARAMETERS_MSMS_AUTO_CALIBRATION_OUT_sample	1
RESULTS_SEARCH_3_PARAMETERS_MSMS_AUTO_CALIBRATION_OUT_squareroot	TRUE
RESULTS_SEARCH_3_PARAMETERS_MAX_PRECURSORS_FRAGLET	1900-01-05
RESULTS_SEARCH_3_PARAMETERS_MAX_PRECURSORS_TAGLET	1
RESULTS_SEARCH_3_PARAMETERS_PRECURSORS_DR_FRAGLET	10
RESULTS_SEARCH_3_PARAMETERS_PRECURSORS_DR_TAGLET	3
RESULTS_SEARCH_3_PARAMETERS_DEFAULT_CHARGE_STATE_1_charge	2
RESULTS_SEARCH_3_PARAMETERS_DEFAULT_CHARGE_STATE_1_probability	1
RESULTS_SEARCH_3_PARAMETERS_DEFAULT_CHARGE_STATE_2_charge	3
RESULTS_SEARCH_3_PARAMETERS_DEFAULT_CHARGE_STATE_2_probability	1
RESULTS_SEARCH_3_PARAMETERS_DEFAULT_CHARGE_STATE_3_charge	4
RESULTS_SEARCH_3_PARAMETERS_DEFAULT_CHARGE_STATE_3_probability	1
RESULTS_SEARCH_3_PARAMETERS_VERSION	5.0.1.0, 4895
RESULTS_SEARCH_3_PARAMETERS_PARAGON_VERSION	5.0.1.0, 4874
RESULTS_SEARCH_3_PARAMETERS_APPLICATION	ProteinPilot(tm) Software
RESULTS_SEARCH_3_PARAMETERS_PROGROUP_alternativedispositionmaximumfoldprobabilitydrop	100
RESULTS_SEARCH_3_PARAMETERS_PROGROUP_alternativedispositionmaximumfoldscoredrop	2
RESULTS_SEARCH_3_PARAMETERS_PROGROUP_autodiscordantpeptidethreshold	0.3
RESULTS_SEARCH_3_PARAMETERS_PROGROUP_bayesconfidencecalclulation	TRUE
RESULTS_SEARCH_3_PARAMETERS_PROGROUP_calibrateconfidence	TRUE
RESULTS_SEARCH_3_PARAMETERS_PROGROUP_compresspeptides	FALSE
RESULTS_SEARCH_3_PARAMETERS_PROGROUP_confidencepercentthresholdforexcludingothersfromquant	15
RESULTS_SEARCH_3_PARAMETERS_PROGROUP_confidencepercentthresholdforincludingselfinquant	15
RESULTS_SEARCH_3_PARAMETERS_PROGROUP_donotstoremspeaklists	FALSE
RESULTS_SEARCH_3_PARAMETERS_PROGROUP_fasta	C:\AB SCIEX\ProteinPilot Data\SearchDatabases\uniprot-zebrafish_with_Clover.fasta
RESULTS_SEARCH_3_PARAMETERS_PROGROUP_featuregroupminpepconf	0.66
RESULTS_SEARCH_3_PARAMETERS_PROGROUP_featuregroupminups	0.47
RESULTS_SEARCH_3_PARAMETERS_PROGROUP_focusingintersection	4
RESULTS_SEARCH_3_PARAMETERS_PROGROUP_focusingminimummatchconfidence	0.1
RESULTS_SEARCH_3_PARAMETERS_PROGROUP_focusingminunusedprotscore	0.1
RESULTS_SEARCH_3_PARAMETERS_PROGROUP_focusingsubsetcutoff	6
RESULTS_SEARCH_3_PARAMETERS_PROGROUP_intersection	1.3
RESULTS_SEARCH_3_PARAMETERS_PROGROUP_minimummatchconfidencecutoff	0.001
RESULTS_SEARCH_3_PARAMETERS_PROGROUP_minunusedprotscore	0.0458
RESULTS_SEARCH_3_PARAMETERS_PROGROUP_subsetcutoff	2
RESULTS_SEARCH_3_PARAMETERS_PROGROUP_unusedprotscorethresholdforexcludingothersfromquant	1900-01-01 07:12:00
RESULTS_SEARCH_3_PARAMETERS_PEAKLIST_count	3721
RESULTS_SEARCH_3_PARAMETERS_PEAKLIST_filenumber	2
RESULTS_SEARCH_3_PARAMETERS_PEAKLIST_original_count	3721
RESULTS_SEARCH_3_PARAMETERS_PEAKLIST_originalfilename	C:\AB SCIEX\ProteinPilot Data\Results\Albert\ZX 20200624 6600\ZX 20200624 C4A Control 2.wiff
RESULTS_SEARCH_3_PARAMETERS_PEAKLIST_partnumber	2
RESULTS_SEARCH_3_PARAMETERS_QUANT_TYPE_background_correction	FALSE
RESULTS_SEARCH_3_PARAMETERS_QUANT_TYPE_bias_correction	TRUE
RESULTS_SEARCH_3_PARAMETERS_QUANT_TYPE_keep_extreme_peptides_over_fraction	0
RESULTS_SEARCH_3_PARAMETERS_QUANT_TYPE_low_confidence_check	TRUE
RESULTS_SEARCH_3_PARAMETERS_QUANT_TYPE_low_intensity_check	TRUE
RESULTS_SEARCH_3_PARAMETERS_QUANT_TYPE_median_statistic	TRUE
RESULTS_SEARCH_3_PARAMETERS_QUANT_TYPE_mod_check	TRUE
RESULTS_SEARCH_3_PARAMETERS_QUANT_TYPE_quant_threshold	-1
RESULTS_SEARCH_3_PARAMETERS_QUANT_TYPE_quant_threshold_sn	9
RESULTS_SEARCH_3_PARAMETERS_QUANT_TYPE_separate_searches	FALSE
RESULTS_SEARCH_3_PARAMETERS_QUANT_TYPE_shared_msms_check	TRUE
RESULTS_SEARCH_3_PARAMETERS_PARAGON_METHOD_SETTINGS_UI_SAMPLE_TYPE	Identification
RESULTS_SEARCH_3_PARAMETERS_PARAGON_METHOD_SETTINGS_UI_CYS_ALKYLATION	Iodoacetamide w other Cys mods possible
RESULTS_SEARCH_3_PARAMETERS_PARAGON_METHOD_SETTINGS_UI_DIGESTION	Trypsin + Lys C
RESULTS_SEARCH_3_PARAMETERS_PARAGON_METHOD_SETTINGS_UI_SPECIAL_FACTOR	Gel-based ID
RESULTS_SEARCH_3_PARAMETERS_PARAGON_METHOD_SETTINGS_UI_INSTRUMENT	TripleTOF 6600
RESULTS_SEARCH_3_PARAMETERS_PARAGON_METHOD_SETTINGS_UI_SEARCH_EFFORT	Thorough
RESULTS_SEARCH_3_PARAMETERS_PARAGON_METHOD_SETTINGS_UI_USER_NAME	IMB-MASS02\massuser
RESULTS_SEARCH_3_PARAMETERS_PARAGON_METHOD_SETTINGS_UI_MACHINE_NAME	IMB-MASS02
RESULTS_SEARCH_3_PARAMETERS_PARAGON_METHOD_SETTINGS_UI_SEARCH_ID	6.37467e+17
RESULTS_SEARCH_3_PARAMETERS_PARAGON_METHOD_SETTINGS_UI_START_TIME	2021-01-19 16:09:14
RESULTS_SEARCH_3_PARAMETERS_PARAGON_METHOD_SETTINGS_UI_MIN_UNUSED_PROTSCORE	0.0458
RESULTS_SEARCH_3_PARAMETERS_PARAGON_METHOD_SETTINGS_UI_PSPEP	TRUE
RESULTS_SEARCH_4_time_cpu	346696
RESULTS_SEARCH_4_time_duration	346723
RESULTS_SEARCH_4_version	5.0.1.4874
RESULTS_SEARCH_4_xml:id	SEARCH:2:637466693437157084_1
RESULTS_SEARCH_4_PARAMETERS_chemical_data_edited	FALSE
RESULTS_SEARCH_4_PARAMETERS_do_multiprecursor_search	TRUE
RESULTS_SEARCH_4_PARAMETERS_do_reverse_search	TRUE
RESULTS_SEARCH_4_PARAMETERS_max_quant_labels	35
RESULTS_SEARCH_4_PARAMETERS_maxresults	15
RESULTS_SEARCH_4_PARAMETERS_separate_searches	FALSE
RESULTS_SEARCH_4_PARAMETERS_MSTOLERANCE_type	dalton
RESULTS_SEARCH_4_PARAMETERS_MSTOLERANCE_value	0.05
RESULTS_SEARCH_4_PARAMETERS_MSMSTOLERANCE_type	dalton
RESULTS_SEARCH_4_PARAMETERS_MSMSTOLERANCE_value	0.1
RESULTS_SEARCH_4_PARAMETERS_MS_STANDARD_DEVIATION_type	dalton
RESULTS_SEARCH_4_PARAMETERS_MS_STANDARD_DEVIATION_value	0.0011
RESULTS_SEARCH_4_PARAMETERS_MSMS_STANDARD_DEVIATION_type	dalton
RESULTS_SEARCH_4_PARAMETERS_MSMS_STANDARD_DEVIATION_value	0.01
RESULTS_SEARCH_4_PARAMETERS_FASTA_filename	C:\AB SCIEX\ProteinPilot Data\SearchDatabases\uniprot-zebrafish_with_Clover.fasta
RESULTS_SEARCH_4_PARAMETERS_AUTO_CALIBRATION_ms	TRUE
RESULTS_SEARCH_4_PARAMETERS_AUTO_CALIBRATION_msexport	FALSE
RESULTS_SEARCH_4_PARAMETERS_AUTO_CALIBRATION_msms	TRUE
RESULTS_SEARCH_4_PARAMETERS_AUTO_CALIBRATION_msmstolsdratio	2.75
RESULTS_SEARCH_4_PARAMETERS_AUTO_CALIBRATION_mstolsdratio	7
RESULTS_SEARCH_4_PARAMETERS_AUTO_CALIBRATION_squareroot	TRUE
RESULTS_SEARCH_4_PARAMETERS_AUTO_CALIBRATION_type	dalton
RESULTS_SEARCH_4_PARAMETERS_AUTO_CALIBRATION_MCP_d_s_s_f	0.0666667
RESULTS_SEARCH_4_PARAMETERS_AUTO_CALIBRATION_MCP_d_s_w_f	3
RESULTS_SEARCH_4_PARAMETERS_AUTO_CALIBRATION_MCP_m_f_r_mbc	200
RESULTS_SEARCH_4_PARAMETERS_AUTO_CALIBRATION_MCP_m_m_c	10
RESULTS_SEARCH_4_PARAMETERS_AUTO_CALIBRATION_MCP_m_m_f_s	0.25
RESULTS_SEARCH_4_PARAMETERS_AUTO_CALIBRATION_MCP_m_m_p_f	0.33
RESULTS_SEARCH_4_PARAMETERS_AUTO_CALIBRATION_MCP_m_m_p_rms_f	1
RESULTS_SEARCH_4_PARAMETERS_AUTO_CALIBRATION_MCP_m_p_t_f	1
RESULTS_SEARCH_4_PARAMETERS_AUTO_CALIBRATION_MCP_m_r_h_n_b	15
RESULTS_SEARCH_4_PARAMETERS_AUTO_CALIBRATION_MCP_m_z_n_s	99
RESULTS_SEARCH_4_PARAMETERS_AUTO_CALIBRATION_MCP_m_z_s_mn_f_r	0.0666667
RESULTS_SEARCH_4_PARAMETERS_AUTO_CALIBRATION_MCP_m_z_s_mx_f_r	0.1
RESULTS_SEARCH_4_PARAMETERS_MS_AUTO_CALIBRATION_OUT_avres	-4.09123e-10
RESULTS_SEARCH_4_PARAMETERS_MS_AUTO_CALIBRATION_OUT_c0	0.000156909
RESULTS_SEARCH_4_PARAMETERS_MS_AUTO_CALIBRATION_OUT_c1minus1	-9.58469e-06
RESULTS_SEARCH_4_PARAMETERS_MS_AUTO_CALIBRATION_OUT_c2	0
RESULTS_SEARCH_4_PARAMETERS_MS_AUTO_CALIBRATION_OUT_file	2
RESULTS_SEARCH_4_PARAMETERS_MS_AUTO_CALIBRATION_OUT_partnumber	2
RESULTS_SEARCH_4_PARAMETERS_MS_AUTO_CALIBRATION_OUT_polyorder	1
RESULTS_SEARCH_4_PARAMETERS_MS_AUTO_CALIBRATION_OUT_sample	1
RESULTS_SEARCH_4_PARAMETERS_MS_AUTO_CALIBRATION_OUT_squareroot	TRUE
RESULTS_SEARCH_4_PARAMETERS_MSMS_AUTO_CALIBRATION_OUT_avres	-5.33631e-08
RESULTS_SEARCH_4_PARAMETERS_MSMS_AUTO_CALIBRATION_OUT_c0	-2.18284e-05
RESULTS_SEARCH_4_PARAMETERS_MSMS_AUTO_CALIBRATION_OUT_c1minus1	-1.12473e-06
RESULTS_SEARCH_4_PARAMETERS_MSMS_AUTO_CALIBRATION_OUT_c2	0
RESULTS_SEARCH_4_PARAMETERS_MSMS_AUTO_CALIBRATION_OUT_file	2
RESULTS_SEARCH_4_PARAMETERS_MSMS_AUTO_CALIBRATION_OUT_partnumber	2
RESULTS_SEARCH_4_PARAMETERS_MSMS_AUTO_CALIBRATION_OUT_polyorder	1
RESULTS_SEARCH_4_PARAMETERS_MSMS_AUTO_CALIBRATION_OUT_sample	1
RESULTS_SEARCH_4_PARAMETERS_MSMS_AUTO_CALIBRATION_OUT_squareroot	TRUE
RESULTS_SEARCH_4_PARAMETERS_MAX_PRECURSORS_FRAGLET	5
RESULTS_SEARCH_4_PARAMETERS_MAX_PRECURSORS_TAGLET	1
RESULTS_SEARCH_4_PARAMETERS_PRECURSORS_DR_FRAGLET	10
RESULTS_SEARCH_4_PARAMETERS_PRECURSORS_DR_TAGLET	3
RESULTS_SEARCH_4_PARAMETERS_DEFAULT_CHARGE_STATE_1_charge	2
RESULTS_SEARCH_4_PARAMETERS_DEFAULT_CHARGE_STATE_1_probability	1
RESULTS_SEARCH_4_PARAMETERS_DEFAULT_CHARGE_STATE_2_charge	3
RESULTS_SEARCH_4_PARAMETERS_DEFAULT_CHARGE_STATE_2_probability	1
RESULTS_SEARCH_4_PARAMETERS_DEFAULT_CHARGE_STATE_3_charge	4
RESULTS_SEARCH_4_PARAMETERS_DEFAULT_CHARGE_STATE_3_probability	1
RESULTS_SEARCH_4_PARAMETERS_VERSION	5.0.1.0, 4895
RESULTS_SEARCH_4_PARAMETERS_PARAGON_VERSION	5.0.1.0, 4874
RESULTS_SEARCH_4_PARAMETERS_APPLICATION	ProteinPilot(tm) Software
RESULTS_SEARCH_4_PARAMETERS_PROGROUP_alternativedispositionmaximumfoldprobabilitydrop	100
RESULTS_SEARCH_4_PARAMETERS_PROGROUP_alternativedispositionmaximumfoldscoredrop	2
RESULTS_SEARCH_4_PARAMETERS_PROGROUP_autodiscordantpeptidethreshold	0.3
RESULTS_SEARCH_4_PARAMETERS_PROGROUP_bayesconfidencecalclulation	TRUE
RESULTS_SEARCH_4_PARAMETERS_PROGROUP_calibrateconfidence	TRUE
RESULTS_SEARCH_4_PARAMETERS_PROGROUP_compresspeptides	FALSE
RESULTS_SEARCH_4_PARAMETERS_PROGROUP_confidencepercentthresholdforexcludingothersfromquant	15
RESULTS_SEARCH_4_PARAMETERS_PROGROUP_confidencepercentthresholdforincludingselfinquant	15
RESULTS_SEARCH_4_PARAMETERS_PROGROUP_donotstoremspeaklists	FALSE
RESULTS_SEARCH_4_PARAMETERS_PROGROUP_fasta	C:\AB SCIEX\ProteinPilot Data\SearchDatabases\uniprot-zebrafish_with_Clover.fasta
RESULTS_SEARCH_4_PARAMETERS_PROGROUP_featuregroupminpepconf	0.66
RESULTS_SEARCH_4_PARAMETERS_PROGROUP_featuregroupminups	0.47
RESULTS_SEARCH_4_PARAMETERS_PROGROUP_focusingintersection	4
RESULTS_SEARCH_4_PARAMETERS_PROGROUP_focusingminimummatchconfidence	0.1
RESULTS_SEARCH_4_PARAMETERS_PROGROUP_focusingminunusedprotscore	0.1
RESULTS_SEARCH_4_PARAMETERS_PROGROUP_focusingsubsetcutoff	6
RESULTS_SEARCH_4_PARAMETERS_PROGROUP_intersection	1.3
RESULTS_SEARCH_4_PARAMETERS_PROGROUP_minimummatchconfidencecutoff	0.001
RESULTS_SEARCH_4_PARAMETERS_PROGROUP_minunusedprotscore	0.0458
RESULTS_SEARCH_4_PARAMETERS_PROGROUP_subsetcutoff	2
RESULTS_SEARCH_4_PARAMETERS_PROGROUP_unusedprotscorethresholdforexcludingothersfromquant	1.3
RESULTS_SEARCH_4_PARAMETERS_PEAKLIST_count	3721
RESULTS_SEARCH_4_PARAMETERS_PEAKLIST_filenumber	2
RESULTS_SEARCH_4_PARAMETERS_PEAKLIST_original_count	3721
RESULTS_SEARCH_4_PARAMETERS_PEAKLIST_originalfilename	C:\AB SCIEX\ProteinPilot Data\Results\Albert\ZX 20200624 6600\ZX 20200624 C4A Control 2.wiff
RESULTS_SEARCH_4_PARAMETERS_PEAKLIST_partnumber	2
RESULTS_SEARCH_4_PARAMETERS_QUANT_TYPE_background_correction	FALSE
RESULTS_SEARCH_4_PARAMETERS_QUANT_TYPE_bias_correction	TRUE
RESULTS_SEARCH_4_PARAMETERS_QUANT_TYPE_keep_extreme_peptides_over_fraction	0
RESULTS_SEARCH_4_PARAMETERS_QUANT_TYPE_low_confidence_check	TRUE
RESULTS_SEARCH_4_PARAMETERS_QUANT_TYPE_low_intensity_check	TRUE
RESULTS_SEARCH_4_PARAMETERS_QUANT_TYPE_median_statistic	TRUE
RESULTS_SEARCH_4_PARAMETERS_QUANT_TYPE_mod_check	TRUE
RESULTS_SEARCH_4_PARAMETERS_QUANT_TYPE_quant_threshold	-1
RESULTS_SEARCH_4_PARAMETERS_QUANT_TYPE_quant_threshold_sn	9
RESULTS_SEARCH_4_PARAMETERS_QUANT_TYPE_separate_searches	FALSE
RESULTS_SEARCH_4_PARAMETERS_QUANT_TYPE_shared_msms_check	TRUE
RESULTS_SEARCH_4_PARAMETERS_PARAGON_METHOD_SETTINGS_UI_SAMPLE_TYPE	Identification
RESULTS_SEARCH_4_PARAMETERS_PARAGON_METHOD_SETTINGS_UI_CYS_ALKYLATION	Iodoacetamide w other Cys mods possible
RESULTS_SEARCH_4_PARAMETERS_PARAGON_METHOD_SETTINGS_UI_DIGESTION	Trypsin + Lys C
RESULTS_SEARCH_4_PARAMETERS_PARAGON_METHOD_SETTINGS_UI_SPECIAL_FACTOR	Gel-based ID
RESULTS_SEARCH_4_PARAMETERS_PARAGON_METHOD_SETTINGS_UI_INSTRUMENT	TripleTOF 6600
RESULTS_SEARCH_4_PARAMETERS_PARAGON_METHOD_SETTINGS_UI_SEARCH_EFFORT	Thorough
RESULTS_SEARCH_4_PARAMETERS_PARAGON_METHOD_SETTINGS_UI_USER_NAME	IMB-MASS02\massuser
RESULTS_SEARCH_4_PARAMETERS_PARAGON_METHOD_SETTINGS_UI_MACHINE_NAME	IMB-MASS02
RESULTS_SEARCH_4_PARAMETERS_PARAGON_METHOD_SETTINGS_UI_SEARCH_ID	6.37467e+17
RESULTS_SEARCH_4_PARAMETERS_PARAGON_METHOD_SETTINGS_UI_START_TIME	2021-01-19 16:09:14
RESULTS_SEARCH_4_PARAMETERS_PARAGON_METHOD_SETTINGS_UI_MIN_UNUSED_PROTSCORE	0.0458
RESULTS_SEARCH_4_PARAMETERS_PARAGON_METHOD_SETTINGS_UI_PSPEP	TRUE
RESULTS_SEARCH_5_time_cpu	163925
RESULTS_SEARCH_5_time_duration	2349-08-04
RESULTS_SEARCH_5_version	5.0.1.4874
RESULTS_SEARCH_5_xml:id	SEARCH:1:637466693437157084_2
RESULTS_SEARCH_5_PARAMETERS_chemical_data_edited	FALSE
RESULTS_SEARCH_5_PARAMETERS_do_multiprecursor_search	TRUE
RESULTS_SEARCH_5_PARAMETERS_do_reverse_search	TRUE
RESULTS_SEARCH_5_PARAMETERS_max_quant_labels	35
RESULTS_SEARCH_5_PARAMETERS_maxresults	15
RESULTS_SEARCH_5_PARAMETERS_separate_searches	FALSE
RESULTS_SEARCH_5_PARAMETERS_MSTOLERANCE_type	dalton
RESULTS_SEARCH_5_PARAMETERS_MSTOLERANCE_value	0.05
RESULTS_SEARCH_5_PARAMETERS_MSMSTOLERANCE_type	dalton
RESULTS_SEARCH_5_PARAMETERS_MSMSTOLERANCE_value	0.1
RESULTS_SEARCH_5_PARAMETERS_MS_STANDARD_DEVIATION_type	dalton
RESULTS_SEARCH_5_PARAMETERS_MS_STANDARD_DEVIATION_value	0.0011
RESULTS_SEARCH_5_PARAMETERS_MSMS_STANDARD_DEVIATION_type	dalton
RESULTS_SEARCH_5_PARAMETERS_MSMS_STANDARD_DEVIATION_value	0.01
RESULTS_SEARCH_5_PARAMETERS_FASTA_filename	C:\AB SCIEX\ProteinPilot Data\SearchDatabases\uniprot-zebrafish_with_Clover.fasta
RESULTS_SEARCH_5_PARAMETERS_AUTO_CALIBRATION_ms	TRUE
RESULTS_SEARCH_5_PARAMETERS_AUTO_CALIBRATION_msexport	FALSE
RESULTS_SEARCH_5_PARAMETERS_AUTO_CALIBRATION_msms	TRUE
RESULTS_SEARCH_5_PARAMETERS_AUTO_CALIBRATION_msmstolsdratio	2.75
RESULTS_SEARCH_5_PARAMETERS_AUTO_CALIBRATION_mstolsdratio	7
RESULTS_SEARCH_5_PARAMETERS_AUTO_CALIBRATION_squareroot	TRUE
RESULTS_SEARCH_5_PARAMETERS_AUTO_CALIBRATION_type	dalton
RESULTS_SEARCH_5_PARAMETERS_AUTO_CALIBRATION_MCP_d_s_s_f	0.0666667
RESULTS_SEARCH_5_PARAMETERS_AUTO_CALIBRATION_MCP_d_s_w_f	3
RESULTS_SEARCH_5_PARAMETERS_AUTO_CALIBRATION_MCP_m_f_r_mbc	200
RESULTS_SEARCH_5_PARAMETERS_AUTO_CALIBRATION_MCP_m_m_c	10
RESULTS_SEARCH_5_PARAMETERS_AUTO_CALIBRATION_MCP_m_m_f_s	0.25
RESULTS_SEARCH_5_PARAMETERS_AUTO_CALIBRATION_MCP_m_m_p_f	0.33
RESULTS_SEARCH_5_PARAMETERS_AUTO_CALIBRATION_MCP_m_m_p_rms_f	1
RESULTS_SEARCH_5_PARAMETERS_AUTO_CALIBRATION_MCP_m_p_t_f	1
RESULTS_SEARCH_5_PARAMETERS_AUTO_CALIBRATION_MCP_m_r_h_n_b	15
RESULTS_SEARCH_5_PARAMETERS_AUTO_CALIBRATION_MCP_m_z_n_s	99
RESULTS_SEARCH_5_PARAMETERS_AUTO_CALIBRATION_MCP_m_z_s_mn_f_r	0.0666667
RESULTS_SEARCH_5_PARAMETERS_AUTO_CALIBRATION_MCP_m_z_s_mx_f_r	0.1
RESULTS_SEARCH_5_PARAMETERS_MS_AUTO_CALIBRATION_OUT_avres	-1.09883e-10
RESULTS_SEARCH_5_PARAMETERS_MS_AUTO_CALIBRATION_OUT_c0	0.000130311
RESULTS_SEARCH_5_PARAMETERS_MS_AUTO_CALIBRATION_OUT_c1minus1	-8.3972e-06
RESULTS_SEARCH_5_PARAMETERS_MS_AUTO_CALIBRATION_OUT_c2	0
RESULTS_SEARCH_5_PARAMETERS_MS_AUTO_CALIBRATION_OUT_file	3
RESULTS_SEARCH_5_PARAMETERS_MS_AUTO_CALIBRATION_OUT_partnumber	3
RESULTS_SEARCH_5_PARAMETERS_MS_AUTO_CALIBRATION_OUT_polyorder	1
RESULTS_SEARCH_5_PARAMETERS_MS_AUTO_CALIBRATION_OUT_sample	1
RESULTS_SEARCH_5_PARAMETERS_MS_AUTO_CALIBRATION_OUT_squareroot	TRUE
RESULTS_SEARCH_5_PARAMETERS_MSMS_AUTO_CALIBRATION_OUT_avres	9.59146e-09
RESULTS_SEARCH_5_PARAMETERS_MSMS_AUTO_CALIBRATION_OUT_c0	-1.13266e-05
RESULTS_SEARCH_5_PARAMETERS_MSMS_AUTO_CALIBRATION_OUT_c1minus1	-5.12609e-07
RESULTS_SEARCH_5_PARAMETERS_MSMS_AUTO_CALIBRATION_OUT_c2	0
RESULTS_SEARCH_5_PARAMETERS_MSMS_AUTO_CALIBRATION_OUT_file	3
RESULTS_SEARCH_5_PARAMETERS_MSMS_AUTO_CALIBRATION_OUT_partnumber	3
RESULTS_SEARCH_5_PARAMETERS_MSMS_AUTO_CALIBRATION_OUT_polyorder	1
RESULTS_SEARCH_5_PARAMETERS_MSMS_AUTO_CALIBRATION_OUT_sample	1
RESULTS_SEARCH_5_PARAMETERS_MSMS_AUTO_CALIBRATION_OUT_squareroot	TRUE
RESULTS_SEARCH_5_PARAMETERS_MAX_PRECURSORS_FRAGLET	5
RESULTS_SEARCH_5_PARAMETERS_MAX_PRECURSORS_TAGLET	1
RESULTS_SEARCH_5_PARAMETERS_PRECURSORS_DR_FRAGLET	10
RESULTS_SEARCH_5_PARAMETERS_PRECURSORS_DR_TAGLET	3
RESULTS_SEARCH_5_PARAMETERS_DEFAULT_CHARGE_STATE_1_charge	2
RESULTS_SEARCH_5_PARAMETERS_DEFAULT_CHARGE_STATE_1_probability	1
RESULTS_SEARCH_5_PARAMETERS_DEFAULT_CHARGE_STATE_2_charge	3
RESULTS_SEARCH_5_PARAMETERS_DEFAULT_CHARGE_STATE_2_probability	1
RESULTS_SEARCH_5_PARAMETERS_DEFAULT_CHARGE_STATE_3_charge	4
RESULTS_SEARCH_5_PARAMETERS_DEFAULT_CHARGE_STATE_3_probability	1
RESULTS_SEARCH_5_PARAMETERS_VERSION	5.0.1.0, 4895
RESULTS_SEARCH_5_PARAMETERS_PARAGON_VERSION	5.0.1.0, 4874
RESULTS_SEARCH_5_PARAMETERS_APPLICATION	ProteinPilot(tm) Software
RESULTS_SEARCH_5_PARAMETERS_PROGROUP_alternativedispositionmaximumfoldprobabilitydrop	100
RESULTS_SEARCH_5_PARAMETERS_PROGROUP_alternativedispositionmaximumfoldscoredrop	2
RESULTS_SEARCH_5_PARAMETERS_PROGROUP_autodiscordantpeptidethreshold	0.3
RESULTS_SEARCH_5_PARAMETERS_PROGROUP_bayesconfidencecalclulation	TRUE
RESULTS_SEARCH_5_PARAMETERS_PROGROUP_calibrateconfidence	TRUE
RESULTS_SEARCH_5_PARAMETERS_PROGROUP_compresspeptides	FALSE
RESULTS_SEARCH_5_PARAMETERS_PROGROUP_confidencepercentthresholdforexcludingothersfromquant	15
RESULTS_SEARCH_5_PARAMETERS_PROGROUP_confidencepercentthresholdforincludingselfinquant	15
RESULTS_SEARCH_5_PARAMETERS_PROGROUP_donotstoremspeaklists	FALSE
RESULTS_SEARCH_5_PARAMETERS_PROGROUP_fasta	C:\AB SCIEX\ProteinPilot Data\SearchDatabases\uniprot-zebrafish_with_Clover.fasta
RESULTS_SEARCH_5_PARAMETERS_PROGROUP_featuregroupminpepconf	0.66
RESULTS_SEARCH_5_PARAMETERS_PROGROUP_featuregroupminups	0.47
RESULTS_SEARCH_5_PARAMETERS_PROGROUP_focusingintersection	4
RESULTS_SEARCH_5_PARAMETERS_PROGROUP_focusingminimummatchconfidence	0.1
RESULTS_SEARCH_5_PARAMETERS_PROGROUP_focusingminunusedprotscore	0.1
RESULTS_SEARCH_5_PARAMETERS_PROGROUP_focusingsubsetcutoff	6
RESULTS_SEARCH_5_PARAMETERS_PROGROUP_intersection	1.3
RESULTS_SEARCH_5_PARAMETERS_PROGROUP_minimummatchconfidencecutoff	0.001
RESULTS_SEARCH_5_PARAMETERS_PROGROUP_minunusedprotscore	0.0458
RESULTS_SEARCH_5_PARAMETERS_PROGROUP_subsetcutoff	2
RESULTS_SEARCH_5_PARAMETERS_PROGROUP_unusedprotscorethresholdforexcludingothersfromquant	1.3
RESULTS_SEARCH_5_PARAMETERS_PEAKLIST_count	3470
RESULTS_SEARCH_5_PARAMETERS_PEAKLIST_filenumber	3
RESULTS_SEARCH_5_PARAMETERS_PEAKLIST_original_count	3470
RESULTS_SEARCH_5_PARAMETERS_PEAKLIST_originalfilename	C:\AB SCIEX\ProteinPilot Data\Results\Albert\ZX 20200624 6600\ZX 20200624 C4A Control 3.wiff
RESULTS_SEARCH_5_PARAMETERS_PEAKLIST_partnumber	3
RESULTS_SEARCH_5_PARAMETERS_QUANT_TYPE_background_correction	FALSE
RESULTS_SEARCH_5_PARAMETERS_QUANT_TYPE_bias_correction	TRUE
RESULTS_SEARCH_5_PARAMETERS_QUANT_TYPE_keep_extreme_peptides_over_fraction	0
RESULTS_SEARCH_5_PARAMETERS_QUANT_TYPE_low_confidence_check	TRUE
RESULTS_SEARCH_5_PARAMETERS_QUANT_TYPE_low_intensity_check	TRUE
RESULTS_SEARCH_5_PARAMETERS_QUANT_TYPE_median_statistic	TRUE
RESULTS_SEARCH_5_PARAMETERS_QUANT_TYPE_mod_check	TRUE
RESULTS_SEARCH_5_PARAMETERS_QUANT_TYPE_quant_threshold	-1
RESULTS_SEARCH_5_PARAMETERS_QUANT_TYPE_quant_threshold_sn	9
RESULTS_SEARCH_5_PARAMETERS_QUANT_TYPE_separate_searches	FALSE
RESULTS_SEARCH_5_PARAMETERS_QUANT_TYPE_shared_msms_check	TRUE
RESULTS_SEARCH_5_PARAMETERS_PARAGON_METHOD_SETTINGS_UI_SAMPLE_TYPE	Identification
RESULTS_SEARCH_5_PARAMETERS_PARAGON_METHOD_SETTINGS_UI_CYS_ALKYLATION	Iodoacetamide w other Cys mods possible
RESULTS_SEARCH_5_PARAMETERS_PARAGON_METHOD_SETTINGS_UI_DIGESTION	Trypsin + Lys C
RESULTS_SEARCH_5_PARAMETERS_PARAGON_METHOD_SETTINGS_UI_SPECIAL_FACTOR	Gel-based ID
RESULTS_SEARCH_5_PARAMETERS_PARAGON_METHOD_SETTINGS_UI_INSTRUMENT	TripleTOF 6600
RESULTS_SEARCH_5_PARAMETERS_PARAGON_METHOD_SETTINGS_UI_SEARCH_EFFORT	Thorough
RESULTS_SEARCH_5_PARAMETERS_PARAGON_METHOD_SETTINGS_UI_USER_NAME	IMB-MASS02\massuser
RESULTS_SEARCH_5_PARAMETERS_PARAGON_METHOD_SETTINGS_UI_MACHINE_NAME	IMB-MASS02
RESULTS_SEARCH_5_PARAMETERS_PARAGON_METHOD_SETTINGS_UI_SEARCH_ID	6.37467e+17
RESULTS_SEARCH_5_PARAMETERS_PARAGON_METHOD_SETTINGS_UI_START_TIME	2021-01-19 16:09:14
RESULTS_SEARCH_5_PARAMETERS_PARAGON_METHOD_SETTINGS_UI_MIN_UNUSED_PROTSCORE	0.0458
RESULTS_SEARCH_5_PARAMETERS_PARAGON_METHOD_SETTINGS_UI_PSPEP	TRUE
RESULTS_SEARCH_6_time_cpu	231692
RESULTS_SEARCH_6_time_duration	231731
RESULTS_SEARCH_6_version	5.0.1.4874
RESULTS_SEARCH_6_xml:id	SEARCH:2:637466693437157084_2
RESULTS_SEARCH_6_PARAMETERS_chemical_data_edited	FALSE
RESULTS_SEARCH_6_PARAMETERS_do_multiprecursor_search	TRUE
RESULTS_SEARCH_6_PARAMETERS_do_reverse_search	TRUE
RESULTS_SEARCH_6_PARAMETERS_max_quant_labels	35
RESULTS_SEARCH_6_PARAMETERS_maxresults	15
RESULTS_SEARCH_6_PARAMETERS_separate_searches	FALSE
RESULTS_SEARCH_6_PARAMETERS_MSTOLERANCE_type	dalton
RESULTS_SEARCH_6_PARAMETERS_MSTOLERANCE_value	0.05
RESULTS_SEARCH_6_PARAMETERS_MSMSTOLERANCE_type	dalton
RESULTS_SEARCH_6_PARAMETERS_MSMSTOLERANCE_value	0.1
RESULTS_SEARCH_6_PARAMETERS_MS_STANDARD_DEVIATION_type	dalton
RESULTS_SEARCH_6_PARAMETERS_MS_STANDARD_DEVIATION_value	0.0011
RESULTS_SEARCH_6_PARAMETERS_MSMS_STANDARD_DEVIATION_type	dalton
RESULTS_SEARCH_6_PARAMETERS_MSMS_STANDARD_DEVIATION_value	0.01
RESULTS_SEARCH_6_PARAMETERS_FASTA_filename	C:\AB SCIEX\ProteinPilot Data\SearchDatabases\uniprot-zebrafish_with_Clover.fasta
RESULTS_SEARCH_6_PARAMETERS_AUTO_CALIBRATION_ms	TRUE
RESULTS_SEARCH_6_PARAMETERS_AUTO_CALIBRATION_msexport	FALSE
RESULTS_SEARCH_6_PARAMETERS_AUTO_CALIBRATION_msms	TRUE
RESULTS_SEARCH_6_PARAMETERS_AUTO_CALIBRATION_msmstolsdratio	2.75
RESULTS_SEARCH_6_PARAMETERS_AUTO_CALIBRATION_mstolsdratio	7
RESULTS_SEARCH_6_PARAMETERS_AUTO_CALIBRATION_squareroot	TRUE
RESULTS_SEARCH_6_PARAMETERS_AUTO_CALIBRATION_type	dalton
RESULTS_SEARCH_6_PARAMETERS_AUTO_CALIBRATION_MCP_d_s_s_f	0.0666667
RESULTS_SEARCH_6_PARAMETERS_AUTO_CALIBRATION_MCP_d_s_w_f	3
RESULTS_SEARCH_6_PARAMETERS_AUTO_CALIBRATION_MCP_m_f_r_mbc	200
RESULTS_SEARCH_6_PARAMETERS_AUTO_CALIBRATION_MCP_m_m_c	10
RESULTS_SEARCH_6_PARAMETERS_AUTO_CALIBRATION_MCP_m_m_f_s	0.25
RESULTS_SEARCH_6_PARAMETERS_AUTO_CALIBRATION_MCP_m_m_p_f	0.33
RESULTS_SEARCH_6_PARAMETERS_AUTO_CALIBRATION_MCP_m_m_p_rms_f	1
RESULTS_SEARCH_6_PARAMETERS_AUTO_CALIBRATION_MCP_m_p_t_f	1
RESULTS_SEARCH_6_PARAMETERS_AUTO_CALIBRATION_MCP_m_r_h_n_b	15
RESULTS_SEARCH_6_PARAMETERS_AUTO_CALIBRATION_MCP_m_z_n_s	99
RESULTS_SEARCH_6_PARAMETERS_AUTO_CALIBRATION_MCP_m_z_s_mn_f_r	0.0666667
RESULTS_SEARCH_6_PARAMETERS_AUTO_CALIBRATION_MCP_m_z_s_mx_f_r	0.1
RESULTS_SEARCH_6_PARAMETERS_MS_AUTO_CALIBRATION_OUT_avres	-1.09883e-10
RESULTS_SEARCH_6_PARAMETERS_MS_AUTO_CALIBRATION_OUT_c0	0.000130311
RESULTS_SEARCH_6_PARAMETERS_MS_AUTO_CALIBRATION_OUT_c1minus1	-8.3972e-06
RESULTS_SEARCH_6_PARAMETERS_MS_AUTO_CALIBRATION_OUT_c2	0
RESULTS_SEARCH_6_PARAMETERS_MS_AUTO_CALIBRATION_OUT_file	3
RESULTS_SEARCH_6_PARAMETERS_MS_AUTO_CALIBRATION_OUT_partnumber	3
RESULTS_SEARCH_6_PARAMETERS_MS_AUTO_CALIBRATION_OUT_polyorder	1
RESULTS_SEARCH_6_PARAMETERS_MS_AUTO_CALIBRATION_OUT_sample	1
RESULTS_SEARCH_6_PARAMETERS_MS_AUTO_CALIBRATION_OUT_squareroot	TRUE
RESULTS_SEARCH_6_PARAMETERS_MSMS_AUTO_CALIBRATION_OUT_avres	9.59146e-09
RESULTS_SEARCH_6_PARAMETERS_MSMS_AUTO_CALIBRATION_OUT_c0	-1.13266e-05
RESULTS_SEARCH_6_PARAMETERS_MSMS_AUTO_CALIBRATION_OUT_c1minus1	-5.12609e-07
RESULTS_SEARCH_6_PARAMETERS_MSMS_AUTO_CALIBRATION_OUT_c2	0
RESULTS_SEARCH_6_PARAMETERS_MSMS_AUTO_CALIBRATION_OUT_file	3
RESULTS_SEARCH_6_PARAMETERS_MSMS_AUTO_CALIBRATION_OUT_partnumber	3
RESULTS_SEARCH_6_PARAMETERS_MSMS_AUTO_CALIBRATION_OUT_polyorder	1
RESULTS_SEARCH_6_PARAMETERS_MSMS_AUTO_CALIBRATION_OUT_sample	1
RESULTS_SEARCH_6_PARAMETERS_MSMS_AUTO_CALIBRATION_OUT_squareroot	TRUE
RESULTS_SEARCH_6_PARAMETERS_MAX_PRECURSORS_FRAGLET	5
RESULTS_SEARCH_6_PARAMETERS_MAX_PRECURSORS_TAGLET	1
RESULTS_SEARCH_6_PARAMETERS_PRECURSORS_DR_FRAGLET	10
RESULTS_SEARCH_6_PARAMETERS_PRECURSORS_DR_TAGLET	3
RESULTS_SEARCH_6_PARAMETERS_DEFAULT_CHARGE_STATE_1_charge	2
RESULTS_SEARCH_6_PARAMETERS_DEFAULT_CHARGE_STATE_1_probability	1
RESULTS_SEARCH_6_PARAMETERS_DEFAULT_CHARGE_STATE_2_charge	3
RESULTS_SEARCH_6_PARAMETERS_DEFAULT_CHARGE_STATE_2_probability	1900-01-01
RESULTS_SEARCH_6_PARAMETERS_DEFAULT_CHARGE_STATE_3_charge	4
RESULTS_SEARCH_6_PARAMETERS_DEFAULT_CHARGE_STATE_3_probability	1
RESULTS_SEARCH_6_PARAMETERS_VERSION	5.0.1.0, 4895
RESULTS_SEARCH_6_PARAMETERS_PARAGON_VERSION	5.0.1.0, 4874
RESULTS_SEARCH_6_PARAMETERS_APPLICATION	ProteinPilot(tm) Software
RESULTS_SEARCH_6_PARAMETERS_PROGROUP_alternativedispositionmaximumfoldprobabilitydrop	100
RESULTS_SEARCH_6_PARAMETERS_PROGROUP_alternativedispositionmaximumfoldscoredrop	2
RESULTS_SEARCH_6_PARAMETERS_PROGROUP_autodiscordantpeptidethreshold	0.3
RESULTS_SEARCH_6_PARAMETERS_PROGROUP_bayesconfidencecalclulation	TRUE
RESULTS_SEARCH_6_PARAMETERS_PROGROUP_calibrateconfidence	TRUE
RESULTS_SEARCH_6_PARAMETERS_PROGROUP_compresspeptides	FALSE
RESULTS_SEARCH_6_PARAMETERS_PROGROUP_confidencepercentthresholdforexcludingothersfromquant	15
RESULTS_SEARCH_6_PARAMETERS_PROGROUP_confidencepercentthresholdforincludingselfinquant	15
RESULTS_SEARCH_6_PARAMETERS_PROGROUP_donotstoremspeaklists	FALSE
RESULTS_SEARCH_6_PARAMETERS_PROGROUP_fasta	C:\AB SCIEX\ProteinPilot Data\SearchDatabases\uniprot-zebrafish_with_Clover.fasta
RESULTS_SEARCH_6_PARAMETERS_PROGROUP_featuregroupminpepconf	0.66
RESULTS_SEARCH_6_PARAMETERS_PROGROUP_featuregroupminups	0.47
RESULTS_SEARCH_6_PARAMETERS_PROGROUP_focusingintersection	4
RESULTS_SEARCH_6_PARAMETERS_PROGROUP_focusingminimummatchconfidence	0.1
RESULTS_SEARCH_6_PARAMETERS_PROGROUP_focusingminunusedprotscore	0.1
RESULTS_SEARCH_6_PARAMETERS_PROGROUP_focusingsubsetcutoff	6
RESULTS_SEARCH_6_PARAMETERS_PROGROUP_intersection	1.3
RESULTS_SEARCH_6_PARAMETERS_PROGROUP_minimummatchconfidencecutoff	0.001
RESULTS_SEARCH_6_PARAMETERS_PROGROUP_minunusedprotscore	0.0458
RESULTS_SEARCH_6_PARAMETERS_PROGROUP_subsetcutoff	2
RESULTS_SEARCH_6_PARAMETERS_PROGROUP_unusedprotscorethresholdforexcludingothersfromquant	1.3
RESULTS_SEARCH_6_PARAMETERS_PEAKLIST_count	3470
RESULTS_SEARCH_6_PARAMETERS_PEAKLIST_filenumber	3
RESULTS_SEARCH_6_PARAMETERS_PEAKLIST_original_count	3470
RESULTS_SEARCH_6_PARAMETERS_PEAKLIST_originalfilename	C:\AB SCIEX\ProteinPilot Data\Results\Albert\ZX 20200624 6600\ZX 20200624 C4A Control 3.wiff
RESULTS_SEARCH_6_PARAMETERS_PEAKLIST_partnumber	3
RESULTS_SEARCH_6_PARAMETERS_QUANT_TYPE_background_correction	FALSE
RESULTS_SEARCH_6_PARAMETERS_QUANT_TYPE_bias_correction	TRUE
RESULTS_SEARCH_6_PARAMETERS_QUANT_TYPE_keep_extreme_peptides_over_fraction	0
RESULTS_SEARCH_6_PARAMETERS_QUANT_TYPE_low_confidence_check	TRUE
RESULTS_SEARCH_6_PARAMETERS_QUANT_TYPE_low_intensity_check	TRUE
RESULTS_SEARCH_6_PARAMETERS_QUANT_TYPE_median_statistic	TRUE
RESULTS_SEARCH_6_PARAMETERS_QUANT_TYPE_mod_check	TRUE
RESULTS_SEARCH_6_PARAMETERS_QUANT_TYPE_quant_threshold	-1
RESULTS_SEARCH_6_PARAMETERS_QUANT_TYPE_quant_threshold_sn	9
RESULTS_SEARCH_6_PARAMETERS_QUANT_TYPE_separate_searches	FALSE
RESULTS_SEARCH_6_PARAMETERS_QUANT_TYPE_shared_msms_check	TRUE
RESULTS_SEARCH_6_PARAMETERS_PARAGON_METHOD_SETTINGS_UI_SAMPLE_TYPE	Identification
RESULTS_SEARCH_6_PARAMETERS_PARAGON_METHOD_SETTINGS_UI_CYS_ALKYLATION	Iodoacetamide w other Cys mods possible
RESULTS_SEARCH_6_PARAMETERS_PARAGON_METHOD_SETTINGS_UI_DIGESTION	Trypsin + Lys C
RESULTS_SEARCH_6_PARAMETERS_PARAGON_METHOD_SETTINGS_UI_SPECIAL_FACTOR	Gel-based ID
RESULTS_SEARCH_6_PARAMETERS_PARAGON_METHOD_SETTINGS_UI_INSTRUMENT	TripleTOF 6600
RESULTS_SEARCH_6_PARAMETERS_PARAGON_METHOD_SETTINGS_UI_SEARCH_EFFORT	Thorough
RESULTS_SEARCH_6_PARAMETERS_PARAGON_METHOD_SETTINGS_UI_USER_NAME	IMB-MASS02\massuser
RESULTS_SEARCH_6_PARAMETERS_PARAGON_METHOD_SETTINGS_UI_MACHINE_NAME	IMB-MASS02
RESULTS_SEARCH_6_PARAMETERS_PARAGON_METHOD_SETTINGS_UI_SEARCH_ID	6.37467e+17
RESULTS_SEARCH_6_PARAMETERS_PARAGON_METHOD_SETTINGS_UI_START_TIME	2021-01-19 16:09:14
RESULTS_SEARCH_6_PARAMETERS_PARAGON_METHOD_SETTINGS_UI_MIN_UNUSED_PROTSCORE	0.0458
RESULTS_SEARCH_6_PARAMETERS_PARAGON_METHOD_SETTINGS_UI_PSPEP	TRUE
RESULTS_SEARCH_7_time_cpu	208963
RESULTS_SEARCH_7_time_duration	211481
RESULTS_SEARCH_7_version	5.0.1.4874
RESULTS_SEARCH_7_xml:id	SEARCH:1:637466693437157084_3
RESULTS_SEARCH_7_PARAMETERS_chemical_data_edited	FALSE
RESULTS_SEARCH_7_PARAMETERS_do_multiprecursor_search	TRUE
RESULTS_SEARCH_7_PARAMETERS_do_reverse_search	TRUE
RESULTS_SEARCH_7_PARAMETERS_max_quant_labels	35
RESULTS_SEARCH_7_PARAMETERS_maxresults	15
RESULTS_SEARCH_7_PARAMETERS_separate_searches	FALSE
RESULTS_SEARCH_7_PARAMETERS_MSTOLERANCE_type	dalton
RESULTS_SEARCH_7_PARAMETERS_MSTOLERANCE_value	0.05
RESULTS_SEARCH_7_PARAMETERS_MSMSTOLERANCE_type	dalton
RESULTS_SEARCH_7_PARAMETERS_MSMSTOLERANCE_value	0.1
RESULTS_SEARCH_7_PARAMETERS_MS_STANDARD_DEVIATION_type	dalton
RESULTS_SEARCH_7_PARAMETERS_MS_STANDARD_DEVIATION_value	0.0011
RESULTS_SEARCH_7_PARAMETERS_MSMS_STANDARD_DEVIATION_type	dalton
RESULTS_SEARCH_7_PARAMETERS_MSMS_STANDARD_DEVIATION_value	0.01
RESULTS_SEARCH_7_PARAMETERS_FASTA_filename	C:\AB SCIEX\ProteinPilot Data\SearchDatabases\uniprot-zebrafish_with_Clover.fasta
RESULTS_SEARCH_7_PARAMETERS_AUTO_CALIBRATION_ms	TRUE
RESULTS_SEARCH_7_PARAMETERS_AUTO_CALIBRATION_msexport	FALSE
RESULTS_SEARCH_7_PARAMETERS_AUTO_CALIBRATION_msms	TRUE
RESULTS_SEARCH_7_PARAMETERS_AUTO_CALIBRATION_msmstolsdratio	2.75
RESULTS_SEARCH_7_PARAMETERS_AUTO_CALIBRATION_mstolsdratio	7
RESULTS_SEARCH_7_PARAMETERS_AUTO_CALIBRATION_squareroot	TRUE
RESULTS_SEARCH_7_PARAMETERS_AUTO_CALIBRATION_type	dalton
RESULTS_SEARCH_7_PARAMETERS_AUTO_CALIBRATION_MCP_d_s_s_f	0.0666667
RESULTS_SEARCH_7_PARAMETERS_AUTO_CALIBRATION_MCP_d_s_w_f	3
RESULTS_SEARCH_7_PARAMETERS_AUTO_CALIBRATION_MCP_m_f_r_mbc	200
RESULTS_SEARCH_7_PARAMETERS_AUTO_CALIBRATION_MCP_m_m_c	10
RESULTS_SEARCH_7_PARAMETERS_AUTO_CALIBRATION_MCP_m_m_f_s	0.25
RESULTS_SEARCH_7_PARAMETERS_AUTO_CALIBRATION_MCP_m_m_p_f	0.33
RESULTS_SEARCH_7_PARAMETERS_AUTO_CALIBRATION_MCP_m_m_p_rms_f	1
RESULTS_SEARCH_7_PARAMETERS_AUTO_CALIBRATION_MCP_m_p_t_f	1
RESULTS_SEARCH_7_PARAMETERS_AUTO_CALIBRATION_MCP_m_r_h_n_b	15
RESULTS_SEARCH_7_PARAMETERS_AUTO_CALIBRATION_MCP_m_z_n_s	99
RESULTS_SEARCH_7_PARAMETERS_AUTO_CALIBRATION_MCP_m_z_s_mn_f_r	0.0666667
RESULTS_SEARCH_7_PARAMETERS_AUTO_CALIBRATION_MCP_m_z_s_mx_f_r	0.1
RESULTS_SEARCH_7_PARAMETERS_MS_AUTO_CALIBRATION_OUT_avres	-1.17722e-10
RESULTS_SEARCH_7_PARAMETERS_MS_AUTO_CALIBRATION_OUT_c0	0.000177726
RESULTS_SEARCH_7_PARAMETERS_MS_AUTO_CALIBRATION_OUT_c1minus1	-1.03565e-05
RESULTS_SEARCH_7_PARAMETERS_MS_AUTO_CALIBRATION_OUT_c2	0
RESULTS_SEARCH_7_PARAMETERS_MS_AUTO_CALIBRATION_OUT_file	3
RESULTS_SEARCH_7_PARAMETERS_MS_AUTO_CALIBRATION_OUT_partnumber	4
RESULTS_SEARCH_7_PARAMETERS_MS_AUTO_CALIBRATION_OUT_polyorder	1
RESULTS_SEARCH_7_PARAMETERS_MS_AUTO_CALIBRATION_OUT_sample	1
RESULTS_SEARCH_7_PARAMETERS_MS_AUTO_CALIBRATION_OUT_squareroot	TRUE
RESULTS_SEARCH_7_PARAMETERS_MSMS_AUTO_CALIBRATION_OUT_avres	-1.34077e-07
RESULTS_SEARCH_7_PARAMETERS_MSMS_AUTO_CALIBRATION_OUT_c0	-3.21225e-05
RESULTS_SEARCH_7_PARAMETERS_MSMS_AUTO_CALIBRATION_OUT_c1minus1	3.40762e-08
RESULTS_SEARCH_7_PARAMETERS_MSMS_AUTO_CALIBRATION_OUT_c2	0
RESULTS_SEARCH_7_PARAMETERS_MSMS_AUTO_CALIBRATION_OUT_file	3
RESULTS_SEARCH_7_PARAMETERS_MSMS_AUTO_CALIBRATION_OUT_partnumber	4
RESULTS_SEARCH_7_PARAMETERS_MSMS_AUTO_CALIBRATION_OUT_polyorder	1
RESULTS_SEARCH_7_PARAMETERS_MSMS_AUTO_CALIBRATION_OUT_sample	1
RESULTS_SEARCH_7_PARAMETERS_MSMS_AUTO_CALIBRATION_OUT_squareroot	TRUE
RESULTS_SEARCH_7_PARAMETERS_MAX_PRECURSORS_FRAGLET	5
RESULTS_SEARCH_7_PARAMETERS_MAX_PRECURSORS_TAGLET	1
RESULTS_SEARCH_7_PARAMETERS_PRECURSORS_DR_FRAGLET	10
RESULTS_SEARCH_7_PARAMETERS_PRECURSORS_DR_TAGLET	3
RESULTS_SEARCH_7_PARAMETERS_DEFAULT_CHARGE_STATE_1_charge	2
RESULTS_SEARCH_7_PARAMETERS_DEFAULT_CHARGE_STATE_1_probability	1
RESULTS_SEARCH_7_PARAMETERS_DEFAULT_CHARGE_STATE_2_charge	3
RESULTS_SEARCH_7_PARAMETERS_DEFAULT_CHARGE_STATE_2_probability	1
RESULTS_SEARCH_7_PARAMETERS_DEFAULT_CHARGE_STATE_3_charge	4
RESULTS_SEARCH_7_PARAMETERS_DEFAULT_CHARGE_STATE_3_probability	1
RESULTS_SEARCH_7_PARAMETERS_VERSION	5.0.1.0, 4895
RESULTS_SEARCH_7_PARAMETERS_PARAGON_VERSION	5.0.1.0, 4874
RESULTS_SEARCH_7_PARAMETERS_APPLICATION	ProteinPilot(tm) Software
RESULTS_SEARCH_7_PARAMETERS_PROGROUP_alternativedispositionmaximumfoldprobabilitydrop	100
RESULTS_SEARCH_7_PARAMETERS_PROGROUP_alternativedispositionmaximumfoldscoredrop	2
RESULTS_SEARCH_7_PARAMETERS_PROGROUP_autodiscordantpeptidethreshold	0.3
RESULTS_SEARCH_7_PARAMETERS_PROGROUP_bayesconfidencecalclulation	TRUE
RESULTS_SEARCH_7_PARAMETERS_PROGROUP_calibrateconfidence	TRUE
RESULTS_SEARCH_7_PARAMETERS_PROGROUP_compresspeptides	FALSE
RESULTS_SEARCH_7_PARAMETERS_PROGROUP_confidencepercentthresholdforexcludingothersfromquant	15
RESULTS_SEARCH_7_PARAMETERS_PROGROUP_confidencepercentthresholdforincludingselfinquant	15
RESULTS_SEARCH_7_PARAMETERS_PROGROUP_donotstoremspeaklists	FALSE
RESULTS_SEARCH_7_PARAMETERS_PROGROUP_fasta	C:\AB SCIEX\ProteinPilot Data\SearchDatabases\uniprot-zebrafish_with_Clover.fasta
RESULTS_SEARCH_7_PARAMETERS_PROGROUP_featuregroupminpepconf	0.66
RESULTS_SEARCH_7_PARAMETERS_PROGROUP_featuregroupminups	0.47
RESULTS_SEARCH_7_PARAMETERS_PROGROUP_focusingintersection	4
RESULTS_SEARCH_7_PARAMETERS_PROGROUP_focusingminimummatchconfidence	0.1
RESULTS_SEARCH_7_PARAMETERS_PROGROUP_focusingminunusedprotscore	0.1
RESULTS_SEARCH_7_PARAMETERS_PROGROUP_focusingsubsetcutoff	6
RESULTS_SEARCH_7_PARAMETERS_PROGROUP_intersection	1.3
RESULTS_SEARCH_7_PARAMETERS_PROGROUP_minimummatchconfidencecutoff	0.001
RESULTS_SEARCH_7_PARAMETERS_PROGROUP_minunusedprotscore	0.0458
RESULTS_SEARCH_7_PARAMETERS_PROGROUP_subsetcutoff	2
RESULTS_SEARCH_7_PARAMETERS_PROGROUP_unusedprotscorethresholdforexcludingothersfromquant	1.3
RESULTS_SEARCH_7_PARAMETERS_PEAKLIST_count	3468
RESULTS_SEARCH_7_PARAMETERS_PEAKLIST_filenumber	3
RESULTS_SEARCH_7_PARAMETERS_PEAKLIST_original_count	3468
RESULTS_SEARCH_7_PARAMETERS_PEAKLIST_originalfilename	C:\AB SCIEX\ProteinPilot Data\Results\Albert\ZX 20200624 6600\ZX 20200624 C4A Control 3.wiff
RESULTS_SEARCH_7_PARAMETERS_PEAKLIST_partnumber	4
RESULTS_SEARCH_7_PARAMETERS_QUANT_TYPE_background_correction	FALSE
RESULTS_SEARCH_7_PARAMETERS_QUANT_TYPE_bias_correction	TRUE
RESULTS_SEARCH_7_PARAMETERS_QUANT_TYPE_keep_extreme_peptides_over_fraction	0
RESULTS_SEARCH_7_PARAMETERS_QUANT_TYPE_low_confidence_check	TRUE
RESULTS_SEARCH_7_PARAMETERS_QUANT_TYPE_low_intensity_check	TRUE
RESULTS_SEARCH_7_PARAMETERS_QUANT_TYPE_median_statistic	TRUE
RESULTS_SEARCH_7_PARAMETERS_QUANT_TYPE_mod_check	TRUE
RESULTS_SEARCH_7_PARAMETERS_QUANT_TYPE_quant_threshold	-1
RESULTS_SEARCH_7_PARAMETERS_QUANT_TYPE_quant_threshold_sn	9
RESULTS_SEARCH_7_PARAMETERS_QUANT_TYPE_separate_searches	FALSE
RESULTS_SEARCH_7_PARAMETERS_QUANT_TYPE_shared_msms_check	TRUE
RESULTS_SEARCH_7_PARAMETERS_PARAGON_METHOD_SETTINGS_UI_SAMPLE_TYPE	Identification
RESULTS_SEARCH_7_PARAMETERS_PARAGON_METHOD_SETTINGS_UI_CYS_ALKYLATION	Iodoacetamide w other Cys mods possible
RESULTS_SEARCH_7_PARAMETERS_PARAGON_METHOD_SETTINGS_UI_DIGESTION	Trypsin + Lys C
RESULTS_SEARCH_7_PARAMETERS_PARAGON_METHOD_SETTINGS_UI_SPECIAL_FACTOR	Gel-based ID
RESULTS_SEARCH_7_PARAMETERS_PARAGON_METHOD_SETTINGS_UI_INSTRUMENT	TripleTOF 6600
RESULTS_SEARCH_7_PARAMETERS_PARAGON_METHOD_SETTINGS_UI_SEARCH_EFFORT	Thorough
RESULTS_SEARCH_7_PARAMETERS_PARAGON_METHOD_SETTINGS_UI_USER_NAME	IMB-MASS02\massuser
RESULTS_SEARCH_7_PARAMETERS_PARAGON_METHOD_SETTINGS_UI_MACHINE_NAME	IMB-MASS02
RESULTS_SEARCH_7_PARAMETERS_PARAGON_METHOD_SETTINGS_UI_SEARCH_ID	6.37467e+17
RESULTS_SEARCH_7_PARAMETERS_PARAGON_METHOD_SETTINGS_UI_START_TIME	2021-01-19 16:09:14
RESULTS_SEARCH_7_PARAMETERS_PARAGON_METHOD_SETTINGS_UI_MIN_UNUSED_PROTSCORE	0.0458
RESULTS_SEARCH_7_PARAMETERS_PARAGON_METHOD_SETTINGS_UI_PSPEP	TRUE
RESULTS_SEARCH_8_time_cpu	275138
RESULTS_SEARCH_8_time_duration	275319
RESULTS_SEARCH_8_version	5.0.1.4874
RESULTS_SEARCH_8_xml:id	SEARCH:2:637466693437157084_3
RESULTS_SEARCH_8_PARAMETERS_chemical_data_edited	FALSE
RESULTS_SEARCH_8_PARAMETERS_do_multiprecursor_search	TRUE
RESULTS_SEARCH_8_PARAMETERS_do_reverse_search	TRUE
RESULTS_SEARCH_8_PARAMETERS_max_quant_labels	35
RESULTS_SEARCH_8_PARAMETERS_maxresults	15
RESULTS_SEARCH_8_PARAMETERS_separate_searches	FALSE
RESULTS_SEARCH_8_PARAMETERS_MSTOLERANCE_type	dalton
RESULTS_SEARCH_8_PARAMETERS_MSTOLERANCE_value	0.05
RESULTS_SEARCH_8_PARAMETERS_MSMSTOLERANCE_type	dalton
RESULTS_SEARCH_8_PARAMETERS_MSMSTOLERANCE_value	0.1
RESULTS_SEARCH_8_PARAMETERS_MS_STANDARD_DEVIATION_type	dalton
RESULTS_SEARCH_8_PARAMETERS_MS_STANDARD_DEVIATION_value	0.0011
RESULTS_SEARCH_8_PARAMETERS_MSMS_STANDARD_DEVIATION_type	dalton
RESULTS_SEARCH_8_PARAMETERS_MSMS_STANDARD_DEVIATION_value	0.01
RESULTS_SEARCH_8_PARAMETERS_FASTA_filename	C:\AB SCIEX\ProteinPilot Data\SearchDatabases\uniprot-zebrafish_with_Clover.fasta
RESULTS_SEARCH_8_PARAMETERS_AUTO_CALIBRATION_ms	TRUE
RESULTS_SEARCH_8_PARAMETERS_AUTO_CALIBRATION_msexport	FALSE
RESULTS_SEARCH_8_PARAMETERS_AUTO_CALIBRATION_msms	TRUE
RESULTS_SEARCH_8_PARAMETERS_AUTO_CALIBRATION_msmstolsdratio	2.75
RESULTS_SEARCH_8_PARAMETERS_AUTO_CALIBRATION_mstolsdratio	7
RESULTS_SEARCH_8_PARAMETERS_AUTO_CALIBRATION_squareroot	TRUE
RESULTS_SEARCH_8_PARAMETERS_AUTO_CALIBRATION_type	dalton
RESULTS_SEARCH_8_PARAMETERS_AUTO_CALIBRATION_MCP_d_s_s_f	0.0666667
RESULTS_SEARCH_8_PARAMETERS_AUTO_CALIBRATION_MCP_d_s_w_f	3
RESULTS_SEARCH_8_PARAMETERS_AUTO_CALIBRATION_MCP_m_f_r_mbc	200
RESULTS_SEARCH_8_PARAMETERS_AUTO_CALIBRATION_MCP_m_m_c	10
RESULTS_SEARCH_8_PARAMETERS_AUTO_CALIBRATION_MCP_m_m_f_s	0.25
RESULTS_SEARCH_8_PARAMETERS_AUTO_CALIBRATION_MCP_m_m_p_f	0.33
RESULTS_SEARCH_8_PARAMETERS_AUTO_CALIBRATION_MCP_m_m_p_rms_f	1
RESULTS_SEARCH_8_PARAMETERS_AUTO_CALIBRATION_MCP_m_p_t_f	1
RESULTS_SEARCH_8_PARAMETERS_AUTO_CALIBRATION_MCP_m_r_h_n_b	15
RESULTS_SEARCH_8_PARAMETERS_AUTO_CALIBRATION_MCP_m_z_n_s	99
RESULTS_SEARCH_8_PARAMETERS_AUTO_CALIBRATION_MCP_m_z_s_mn_f_r	0.0666667
RESULTS_SEARCH_8_PARAMETERS_AUTO_CALIBRATION_MCP_m_z_s_mx_f_r	0.1
RESULTS_SEARCH_8_PARAMETERS_MS_AUTO_CALIBRATION_OUT_avres	-1.17722e-10
RESULTS_SEARCH_8_PARAMETERS_MS_AUTO_CALIBRATION_OUT_c0	0.000177726
RESULTS_SEARCH_8_PARAMETERS_MS_AUTO_CALIBRATION_OUT_c1minus1	-1.03565e-05
RESULTS_SEARCH_8_PARAMETERS_MS_AUTO_CALIBRATION_OUT_c2	0
RESULTS_SEARCH_8_PARAMETERS_MS_AUTO_CALIBRATION_OUT_file	3
RESULTS_SEARCH_8_PARAMETERS_MS_AUTO_CALIBRATION_OUT_partnumber	4
RESULTS_SEARCH_8_PARAMETERS_MS_AUTO_CALIBRATION_OUT_polyorder	1
RESULTS_SEARCH_8_PARAMETERS_MS_AUTO_CALIBRATION_OUT_sample	1
RESULTS_SEARCH_8_PARAMETERS_MS_AUTO_CALIBRATION_OUT_squareroot	TRUE
RESULTS_SEARCH_8_PARAMETERS_MSMS_AUTO_CALIBRATION_OUT_avres	-1.34077e-07
RESULTS_SEARCH_8_PARAMETERS_MSMS_AUTO_CALIBRATION_OUT_c0	-3.21225e-05
RESULTS_SEARCH_8_PARAMETERS_MSMS_AUTO_CALIBRATION_OUT_c1minus1	3.40762e-08
RESULTS_SEARCH_8_PARAMETERS_MSMS_AUTO_CALIBRATION_OUT_c2	0
RESULTS_SEARCH_8_PARAMETERS_MSMS_AUTO_CALIBRATION_OUT_file	3
RESULTS_SEARCH_8_PARAMETERS_MSMS_AUTO_CALIBRATION_OUT_partnumber	4
RESULTS_SEARCH_8_PARAMETERS_MSMS_AUTO_CALIBRATION_OUT_polyorder	1
RESULTS_SEARCH_8_PARAMETERS_MSMS_AUTO_CALIBRATION_OUT_sample	1
RESULTS_SEARCH_8_PARAMETERS_MSMS_AUTO_CALIBRATION_OUT_squareroot	TRUE
RESULTS_SEARCH_8_PARAMETERS_MAX_PRECURSORS_FRAGLET	5
RESULTS_SEARCH_8_PARAMETERS_MAX_PRECURSORS_TAGLET	1
RESULTS_SEARCH_8_PARAMETERS_PRECURSORS_DR_FRAGLET	10
RESULTS_SEARCH_8_PARAMETERS_PRECURSORS_DR_TAGLET	3
RESULTS_SEARCH_8_PARAMETERS_DEFAULT_CHARGE_STATE_1_charge	2
RESULTS_SEARCH_8_PARAMETERS_DEFAULT_CHARGE_STATE_1_probability	1
RESULTS_SEARCH_8_PARAMETERS_DEFAULT_CHARGE_STATE_2_charge	1900-01-03
RESULTS_SEARCH_8_PARAMETERS_DEFAULT_CHARGE_STATE_2_probability	1900-01-01
RESULTS_SEARCH_8_PARAMETERS_DEFAULT_CHARGE_STATE_3_charge	4
RESULTS_SEARCH_8_PARAMETERS_DEFAULT_CHARGE_STATE_3_probability	1
RESULTS_SEARCH_8_PARAMETERS_VERSION	5.0.1.0, 4895
RESULTS_SEARCH_8_PARAMETERS_PARAGON_VERSION	5.0.1.0, 4874
RESULTS_SEARCH_8_PARAMETERS_APPLICATION	ProteinPilot(tm) Software
RESULTS_SEARCH_8_PARAMETERS_PROGROUP_alternativedispositionmaximumfoldprobabilitydrop	100
RESULTS_SEARCH_8_PARAMETERS_PROGROUP_alternativedispositionmaximumfoldscoredrop	2
RESULTS_SEARCH_8_PARAMETERS_PROGROUP_autodiscordantpeptidethreshold	0.3
RESULTS_SEARCH_8_PARAMETERS_PROGROUP_bayesconfidencecalclulation	TRUE
RESULTS_SEARCH_8_PARAMETERS_PROGROUP_calibrateconfidence	TRUE
RESULTS_SEARCH_8_PARAMETERS_PROGROUP_compresspeptides	FALSE
RESULTS_SEARCH_8_PARAMETERS_PROGROUP_confidencepercentthresholdforexcludingothersfromquant	15
RESULTS_SEARCH_8_PARAMETERS_PROGROUP_confidencepercentthresholdforincludingselfinquant	15
RESULTS_SEARCH_8_PARAMETERS_PROGROUP_donotstoremspeaklists	FALSE
RESULTS_SEARCH_8_PARAMETERS_PROGROUP_fasta	C:\AB SCIEX\ProteinPilot Data\SearchDatabases\uniprot-zebrafish_with_Clover.fasta
RESULTS_SEARCH_8_PARAMETERS_PROGROUP_featuregroupminpepconf	0.66
RESULTS_SEARCH_8_PARAMETERS_PROGROUP_featuregroupminups	0.47
RESULTS_SEARCH_8_PARAMETERS_PROGROUP_focusingintersection	4
RESULTS_SEARCH_8_PARAMETERS_PROGROUP_focusingminimummatchconfidence	0.1
RESULTS_SEARCH_8_PARAMETERS_PROGROUP_focusingminunusedprotscore	0.1
RESULTS_SEARCH_8_PARAMETERS_PROGROUP_focusingsubsetcutoff	6
RESULTS_SEARCH_8_PARAMETERS_PROGROUP_intersection	1.3
RESULTS_SEARCH_8_PARAMETERS_PROGROUP_minimummatchconfidencecutoff	0.001
RESULTS_SEARCH_8_PARAMETERS_PROGROUP_minunusedprotscore	0.0458
RESULTS_SEARCH_8_PARAMETERS_PROGROUP_subsetcutoff	2
RESULTS_SEARCH_8_PARAMETERS_PROGROUP_unusedprotscorethresholdforexcludingothersfromquant	1.3
RESULTS_SEARCH_8_PARAMETERS_PEAKLIST_count	3468
RESULTS_SEARCH_8_PARAMETERS_PEAKLIST_filenumber	3
RESULTS_SEARCH_8_PARAMETERS_PEAKLIST_original_count	3468
RESULTS_SEARCH_8_PARAMETERS_PEAKLIST_originalfilename	C:\AB SCIEX\ProteinPilot Data\Results\Albert\ZX 20200624 6600\ZX 20200624 C4A Control 3.wiff
RESULTS_SEARCH_8_PARAMETERS_PEAKLIST_partnumber	4
RESULTS_SEARCH_8_PARAMETERS_QUANT_TYPE_background_correction	FALSE
RESULTS_SEARCH_8_PARAMETERS_QUANT_TYPE_bias_correction	TRUE
RESULTS_SEARCH_8_PARAMETERS_QUANT_TYPE_keep_extreme_peptides_over_fraction	0
RESULTS_SEARCH_8_PARAMETERS_QUANT_TYPE_low_confidence_check	TRUE
RESULTS_SEARCH_8_PARAMETERS_QUANT_TYPE_low_intensity_check	TRUE
RESULTS_SEARCH_8_PARAMETERS_QUANT_TYPE_median_statistic	TRUE
RESULTS_SEARCH_8_PARAMETERS_QUANT_TYPE_mod_check	TRUE
RESULTS_SEARCH_8_PARAMETERS_QUANT_TYPE_quant_threshold	-1
RESULTS_SEARCH_8_PARAMETERS_QUANT_TYPE_quant_threshold_sn	9
RESULTS_SEARCH_8_PARAMETERS_QUANT_TYPE_separate_searches	FALSE
RESULTS_SEARCH_8_PARAMETERS_QUANT_TYPE_shared_msms_check	TRUE
RESULTS_SEARCH_8_PARAMETERS_PARAGON_METHOD_SETTINGS_UI_SAMPLE_TYPE	Identification
RESULTS_SEARCH_8_PARAMETERS_PARAGON_METHOD_SETTINGS_UI_CYS_ALKYLATION	Iodoacetamide w other Cys mods possible
RESULTS_SEARCH_8_PARAMETERS_PARAGON_METHOD_SETTINGS_UI_DIGESTION	Trypsin + Lys C
RESULTS_SEARCH_8_PARAMETERS_PARAGON_METHOD_SETTINGS_UI_SPECIAL_FACTOR	Gel-based ID
RESULTS_SEARCH_8_PARAMETERS_PARAGON_METHOD_SETTINGS_UI_INSTRUMENT	TripleTOF 6600
RESULTS_SEARCH_8_PARAMETERS_PARAGON_METHOD_SETTINGS_UI_SEARCH_EFFORT	Thorough
RESULTS_SEARCH_8_PARAMETERS_PARAGON_METHOD_SETTINGS_UI_USER_NAME	IMB-MASS02\massuser
RESULTS_SEARCH_8_PARAMETERS_PARAGON_METHOD_SETTINGS_UI_MACHINE_NAME	IMB-MASS02
RESULTS_SEARCH_8_PARAMETERS_PARAGON_METHOD_SETTINGS_UI_SEARCH_ID	6.37467e+17
RESULTS_SEARCH_8_PARAMETERS_PARAGON_METHOD_SETTINGS_UI_START_TIME	2021-01-19 16:09:14
RESULTS_SEARCH_8_PARAMETERS_PARAGON_METHOD_SETTINGS_UI_MIN_UNUSED_PROTSCORE	0.0458
RESULTS_SEARCH_8_PARAMETERS_PARAGON_METHOD_SETTINGS_UI_PSPEP	TRUE
RESULTS_SEARCH_9_time_cpu	243252
RESULTS_SEARCH_9_time_duration	247441
RESULTS_SEARCH_9_version	5.0.1.4874
RESULTS_SEARCH_9_xml:id	SEARCH:1:637466693437157084_4
RESULTS_SEARCH_9_PARAMETERS_chemical_data_edited	FALSE
RESULTS_SEARCH_9_PARAMETERS_do_multiprecursor_search	TRUE
RESULTS_SEARCH_9_PARAMETERS_do_reverse_search	TRUE
RESULTS_SEARCH_9_PARAMETERS_max_quant_labels	35
RESULTS_SEARCH_9_PARAMETERS_maxresults	15
RESULTS_SEARCH_9_PARAMETERS_separate_searches	FALSE
RESULTS_SEARCH_9_PARAMETERS_MSTOLERANCE_type	dalton
RESULTS_SEARCH_9_PARAMETERS_MSTOLERANCE_value	0.05
RESULTS_SEARCH_9_PARAMETERS_MSMSTOLERANCE_type	dalton
RESULTS_SEARCH_9_PARAMETERS_MSMSTOLERANCE_value	0.1
RESULTS_SEARCH_9_PARAMETERS_MS_STANDARD_DEVIATION_type	dalton
RESULTS_SEARCH_9_PARAMETERS_MS_STANDARD_DEVIATION_value	0.0011
RESULTS_SEARCH_9_PARAMETERS_MSMS_STANDARD_DEVIATION_type	dalton
RESULTS_SEARCH_9_PARAMETERS_MSMS_STANDARD_DEVIATION_value	0.01
RESULTS_SEARCH_9_PARAMETERS_FASTA_filename	C:\AB SCIEX\ProteinPilot Data\SearchDatabases\uniprot-zebrafish_with_Clover.fasta
RESULTS_SEARCH_9_PARAMETERS_AUTO_CALIBRATION_ms	TRUE
RESULTS_SEARCH_9_PARAMETERS_AUTO_CALIBRATION_msexport	FALSE
RESULTS_SEARCH_9_PARAMETERS_AUTO_CALIBRATION_msms	TRUE
RESULTS_SEARCH_9_PARAMETERS_AUTO_CALIBRATION_msmstolsdratio	2.75
RESULTS_SEARCH_9_PARAMETERS_AUTO_CALIBRATION_mstolsdratio	7
RESULTS_SEARCH_9_PARAMETERS_AUTO_CALIBRATION_squareroot	TRUE
RESULTS_SEARCH_9_PARAMETERS_AUTO_CALIBRATION_type	dalton
RESULTS_SEARCH_9_PARAMETERS_AUTO_CALIBRATION_MCP_d_s_s_f	0.0666667
RESULTS_SEARCH_9_PARAMETERS_AUTO_CALIBRATION_MCP_d_s_w_f	3
RESULTS_SEARCH_9_PARAMETERS_AUTO_CALIBRATION_MCP_m_f_r_mbc	200
RESULTS_SEARCH_9_PARAMETERS_AUTO_CALIBRATION_MCP_m_m_c	10
RESULTS_SEARCH_9_PARAMETERS_AUTO_CALIBRATION_MCP_m_m_f_s	0.25
RESULTS_SEARCH_9_PARAMETERS_AUTO_CALIBRATION_MCP_m_m_p_f	0.33
RESULTS_SEARCH_9_PARAMETERS_AUTO_CALIBRATION_MCP_m_m_p_rms_f	1
RESULTS_SEARCH_9_PARAMETERS_AUTO_CALIBRATION_MCP_m_p_t_f	1
RESULTS_SEARCH_9_PARAMETERS_AUTO_CALIBRATION_MCP_m_r_h_n_b	15
RESULTS_SEARCH_9_PARAMETERS_AUTO_CALIBRATION_MCP_m_z_n_s	99
RESULTS_SEARCH_9_PARAMETERS_AUTO_CALIBRATION_MCP_m_z_s_mn_f_r	0.0666667
RESULTS_SEARCH_9_PARAMETERS_AUTO_CALIBRATION_MCP_m_z_s_mx_f_r	0.1
RESULTS_SEARCH_9_PARAMETERS_MS_AUTO_CALIBRATION_OUT_avres	-1.95658e-10
RESULTS_SEARCH_9_PARAMETERS_MS_AUTO_CALIBRATION_OUT_c0	0.000142427
RESULTS_SEARCH_9_PARAMETERS_MS_AUTO_CALIBRATION_OUT_c1minus1	-8.19503e-06
RESULTS_SEARCH_9_PARAMETERS_MS_AUTO_CALIBRATION_OUT_c2	0
RESULTS_SEARCH_9_PARAMETERS_MS_AUTO_CALIBRATION_OUT_file	3
RESULTS_SEARCH_9_PARAMETERS_MS_AUTO_CALIBRATION_OUT_partnumber	5
RESULTS_SEARCH_9_PARAMETERS_MS_AUTO_CALIBRATION_OUT_polyorder	1
RESULTS_SEARCH_9_PARAMETERS_MS_AUTO_CALIBRATION_OUT_sample	1
RESULTS_SEARCH_9_PARAMETERS_MS_AUTO_CALIBRATION_OUT_squareroot	TRUE
RESULTS_SEARCH_9_PARAMETERS_MSMS_AUTO_CALIBRATION_OUT_avres	-1.32534e-07
RESULTS_SEARCH_9_PARAMETERS_MSMS_AUTO_CALIBRATION_OUT_c0	-1.62932e-05
RESULTS_SEARCH_9_PARAMETERS_MSMS_AUTO_CALIBRATION_OUT_c1minus1	-1.05107e-06
RESULTS_SEARCH_9_PARAMETERS_MSMS_AUTO_CALIBRATION_OUT_c2	0
RESULTS_SEARCH_9_PARAMETERS_MSMS_AUTO_CALIBRATION_OUT_file	3
RESULTS_SEARCH_9_PARAMETERS_MSMS_AUTO_CALIBRATION_OUT_partnumber	5
RESULTS_SEARCH_9_PARAMETERS_MSMS_AUTO_CALIBRATION_OUT_polyorder	1
RESULTS_SEARCH_9_PARAMETERS_MSMS_AUTO_CALIBRATION_OUT_sample	1
RESULTS_SEARCH_9_PARAMETERS_MSMS_AUTO_CALIBRATION_OUT_squareroot	TRUE
RESULTS_SEARCH_9_PARAMETERS_MAX_PRECURSORS_FRAGLET	5
RESULTS_SEARCH_9_PARAMETERS_MAX_PRECURSORS_TAGLET	1
RESULTS_SEARCH_9_PARAMETERS_PRECURSORS_DR_FRAGLET	10
RESULTS_SEARCH_9_PARAMETERS_PRECURSORS_DR_TAGLET	3
RESULTS_SEARCH_9_PARAMETERS_DEFAULT_CHARGE_STATE_1_charge	2
RESULTS_SEARCH_9_PARAMETERS_DEFAULT_CHARGE_STATE_1_probability	1
RESULTS_SEARCH_9_PARAMETERS_DEFAULT_CHARGE_STATE_2_charge	3
RESULTS_SEARCH_9_PARAMETERS_DEFAULT_CHARGE_STATE_2_probability	1
RESULTS_SEARCH_9_PARAMETERS_DEFAULT_CHARGE_STATE_3_charge	4
RESULTS_SEARCH_9_PARAMETERS_DEFAULT_CHARGE_STATE_3_probability	1
RESULTS_SEARCH_9_PARAMETERS_VERSION	5.0.1.0, 4895
RESULTS_SEARCH_9_PARAMETERS_PARAGON_VERSION	5.0.1.0, 4874
RESULTS_SEARCH_9_PARAMETERS_APPLICATION	ProteinPilot(tm) Software
RESULTS_SEARCH_9_PARAMETERS_PROGROUP_alternativedispositionmaximumfoldprobabilitydrop	100
RESULTS_SEARCH_9_PARAMETERS_PROGROUP_alternativedispositionmaximumfoldscoredrop	2
RESULTS_SEARCH_9_PARAMETERS_PROGROUP_autodiscordantpeptidethreshold	0.3
RESULTS_SEARCH_9_PARAMETERS_PROGROUP_bayesconfidencecalclulation	TRUE
RESULTS_SEARCH_9_PARAMETERS_PROGROUP_calibrateconfidence	TRUE
RESULTS_SEARCH_9_PARAMETERS_PROGROUP_compresspeptides	FALSE
RESULTS_SEARCH_9_PARAMETERS_PROGROUP_confidencepercentthresholdforexcludingothersfromquant	15
RESULTS_SEARCH_9_PARAMETERS_PROGROUP_confidencepercentthresholdforincludingselfinquant	15
RESULTS_SEARCH_9_PARAMETERS_PROGROUP_donotstoremspeaklists	FALSE
RESULTS_SEARCH_9_PARAMETERS_PROGROUP_fasta	C:\AB SCIEX\ProteinPilot Data\SearchDatabases\uniprot-zebrafish_with_Clover.fasta
RESULTS_SEARCH_9_PARAMETERS_PROGROUP_featuregroupminpepconf	0.66
RESULTS_SEARCH_9_PARAMETERS_PROGROUP_featuregroupminups	0.47
RESULTS_SEARCH_9_PARAMETERS_PROGROUP_focusingintersection	4
RESULTS_SEARCH_9_PARAMETERS_PROGROUP_focusingminimummatchconfidence	0.1
RESULTS_SEARCH_9_PARAMETERS_PROGROUP_focusingminunusedprotscore	02:24:00
RESULTS_SEARCH_9_PARAMETERS_PROGROUP_focusingsubsetcutoff	6
RESULTS_SEARCH_9_PARAMETERS_PROGROUP_intersection	1.3
RESULTS_SEARCH_9_PARAMETERS_PROGROUP_minimummatchconfidencecutoff	0.001
RESULTS_SEARCH_9_PARAMETERS_PROGROUP_minunusedprotscore	0.0458
RESULTS_SEARCH_9_PARAMETERS_PROGROUP_subsetcutoff	2
RESULTS_SEARCH_9_PARAMETERS_PROGROUP_unusedprotscorethresholdforexcludingothersfromquant	1.3
RESULTS_SEARCH_9_PARAMETERS_PEAKLIST_count	3451
RESULTS_SEARCH_9_PARAMETERS_PEAKLIST_filenumber	3
RESULTS_SEARCH_9_PARAMETERS_PEAKLIST_original_count	3451
RESULTS_SEARCH_9_PARAMETERS_PEAKLIST_originalfilename	C:\AB SCIEX\ProteinPilot Data\Results\Albert\ZX 20200624 6600\ZX 20200624 C4A Control 3.wiff
RESULTS_SEARCH_9_PARAMETERS_PEAKLIST_partnumber	5
RESULTS_SEARCH_9_PARAMETERS_QUANT_TYPE_background_correction	FALSE
RESULTS_SEARCH_9_PARAMETERS_QUANT_TYPE_bias_correction	TRUE
RESULTS_SEARCH_9_PARAMETERS_QUANT_TYPE_keep_extreme_peptides_over_fraction	0
RESULTS_SEARCH_9_PARAMETERS_QUANT_TYPE_low_confidence_check	TRUE
RESULTS_SEARCH_9_PARAMETERS_QUANT_TYPE_low_intensity_check	TRUE
RESULTS_SEARCH_9_PARAMETERS_QUANT_TYPE_median_statistic	TRUE
RESULTS_SEARCH_9_PARAMETERS_QUANT_TYPE_mod_check	TRUE
RESULTS_SEARCH_9_PARAMETERS_QUANT_TYPE_quant_threshold	-1
RESULTS_SEARCH_9_PARAMETERS_QUANT_TYPE_quant_threshold_sn	9
RESULTS_SEARCH_9_PARAMETERS_QUANT_TYPE_separate_searches	FALSE
RESULTS_SEARCH_9_PARAMETERS_QUANT_TYPE_shared_msms_check	TRUE
RESULTS_SEARCH_9_PARAMETERS_PARAGON_METHOD_SETTINGS_UI_SAMPLE_TYPE	Identification
RESULTS_SEARCH_9_PARAMETERS_PARAGON_METHOD_SETTINGS_UI_CYS_ALKYLATION	Iodoacetamide w other Cys mods possible
RESULTS_SEARCH_9_PARAMETERS_PARAGON_METHOD_SETTINGS_UI_DIGESTION	Trypsin + Lys C
RESULTS_SEARCH_9_PARAMETERS_PARAGON_METHOD_SETTINGS_UI_SPECIAL_FACTOR	Gel-based ID
RESULTS_SEARCH_9_PARAMETERS_PARAGON_METHOD_SETTINGS_UI_INSTRUMENT	TripleTOF 6600
RESULTS_SEARCH_9_PARAMETERS_PARAGON_METHOD_SETTINGS_UI_SEARCH_EFFORT	Thorough
RESULTS_SEARCH_9_PARAMETERS_PARAGON_METHOD_SETTINGS_UI_USER_NAME	IMB-MASS02\massuser
RESULTS_SEARCH_9_PARAMETERS_PARAGON_METHOD_SETTINGS_UI_MACHINE_NAME	IMB-MASS02
RESULTS_SEARCH_9_PARAMETERS_PARAGON_METHOD_SETTINGS_UI_SEARCH_ID	6.37467e+17
RESULTS_SEARCH_9_PARAMETERS_PARAGON_METHOD_SETTINGS_UI_START_TIME	2021-01-19 16:09:14
RESULTS_SEARCH_9_PARAMETERS_PARAGON_METHOD_SETTINGS_UI_MIN_UNUSED_PROTSCORE	0.0458
RESULTS_SEARCH_9_PARAMETERS_PARAGON_METHOD_SETTINGS_UI_PSPEP	TRUE
RESULTS_SEARCH_10_time_cpu	552524
RESULTS_SEARCH_10_time_duration	552713
RESULTS_SEARCH_10_version	5.0.1.4874
RESULTS_SEARCH_10_xml:id	SEARCH:2:637466693437157084_4
RESULTS_SEARCH_10_PARAMETERS_chemical_data_edited	FALSE
RESULTS_SEARCH_10_PARAMETERS_do_multiprecursor_search	TRUE
RESULTS_SEARCH_10_PARAMETERS_do_reverse_search	TRUE
RESULTS_SEARCH_10_PARAMETERS_max_quant_labels	35
RESULTS_SEARCH_10_PARAMETERS_maxresults	15
RESULTS_SEARCH_10_PARAMETERS_separate_searches	FALSE
RESULTS_SEARCH_10_PARAMETERS_MSTOLERANCE_type	dalton
RESULTS_SEARCH_10_PARAMETERS_MSTOLERANCE_value	0.05
RESULTS_SEARCH_10_PARAMETERS_MSMSTOLERANCE_type	dalton
RESULTS_SEARCH_10_PARAMETERS_MSMSTOLERANCE_value	0.1
RESULTS_SEARCH_10_PARAMETERS_MS_STANDARD_DEVIATION_type	dalton
RESULTS_SEARCH_10_PARAMETERS_MS_STANDARD_DEVIATION_value	0.0011
RESULTS_SEARCH_10_PARAMETERS_MSMS_STANDARD_DEVIATION_type	dalton
RESULTS_SEARCH_10_PARAMETERS_MSMS_STANDARD_DEVIATION_value	0.01
RESULTS_SEARCH_10_PARAMETERS_FASTA_filename	C:\AB SCIEX\ProteinPilot Data\SearchDatabases\uniprot-zebrafish_with_Clover.fasta
RESULTS_SEARCH_10_PARAMETERS_AUTO_CALIBRATION_ms	TRUE
RESULTS_SEARCH_10_PARAMETERS_AUTO_CALIBRATION_msexport	FALSE
RESULTS_SEARCH_10_PARAMETERS_AUTO_CALIBRATION_msms	TRUE
RESULTS_SEARCH_10_PARAMETERS_AUTO_CALIBRATION_msmstolsdratio	2.75
RESULTS_SEARCH_10_PARAMETERS_AUTO_CALIBRATION_mstolsdratio	7
RESULTS_SEARCH_10_PARAMETERS_AUTO_CALIBRATION_squareroot	TRUE
RESULTS_SEARCH_10_PARAMETERS_AUTO_CALIBRATION_type	dalton
RESULTS_SEARCH_10_PARAMETERS_AUTO_CALIBRATION_MCP_d_s_s_f	0.0666667
RESULTS_SEARCH_10_PARAMETERS_AUTO_CALIBRATION_MCP_d_s_w_f	3
RESULTS_SEARCH_10_PARAMETERS_AUTO_CALIBRATION_MCP_m_f_r_mbc	200
RESULTS_SEARCH_10_PARAMETERS_AUTO_CALIBRATION_MCP_m_m_c	10
RESULTS_SEARCH_10_PARAMETERS_AUTO_CALIBRATION_MCP_m_m_f_s	0.25
RESULTS_SEARCH_10_PARAMETERS_AUTO_CALIBRATION_MCP_m_m_p_f	0.33
RESULTS_SEARCH_10_PARAMETERS_AUTO_CALIBRATION_MCP_m_m_p_rms_f	1
RESULTS_SEARCH_10_PARAMETERS_AUTO_CALIBRATION_MCP_m_p_t_f	1
RESULTS_SEARCH_10_PARAMETERS_AUTO_CALIBRATION_MCP_m_r_h_n_b	15
RESULTS_SEARCH_10_PARAMETERS_AUTO_CALIBRATION_MCP_m_z_n_s	99
RESULTS_SEARCH_10_PARAMETERS_AUTO_CALIBRATION_MCP_m_z_s_mn_f_r	0.0666667
RESULTS_SEARCH_10_PARAMETERS_AUTO_CALIBRATION_MCP_m_z_s_mx_f_r	0.1
RESULTS_SEARCH_10_PARAMETERS_MS_AUTO_CALIBRATION_OUT_avres	-1.95658e-10
RESULTS_SEARCH_10_PARAMETERS_MS_AUTO_CALIBRATION_OUT_c0	0.000142427
RESULTS_SEARCH_10_PARAMETERS_MS_AUTO_CALIBRATION_OUT_c1minus1	-8.19503e-06
RESULTS_SEARCH_10_PARAMETERS_MS_AUTO_CALIBRATION_OUT_c2	0
RESULTS_SEARCH_10_PARAMETERS_MS_AUTO_CALIBRATION_OUT_file	3
RESULTS_SEARCH_10_PARAMETERS_MS_AUTO_CALIBRATION_OUT_partnumber	5
RESULTS_SEARCH_10_PARAMETERS_MS_AUTO_CALIBRATION_OUT_polyorder	1
RESULTS_SEARCH_10_PARAMETERS_MS_AUTO_CALIBRATION_OUT_sample	1
RESULTS_SEARCH_10_PARAMETERS_MS_AUTO_CALIBRATION_OUT_squareroot	TRUE
RESULTS_SEARCH_10_PARAMETERS_MSMS_AUTO_CALIBRATION_OUT_avres	-1.32534e-07
RESULTS_SEARCH_10_PARAMETERS_MSMS_AUTO_CALIBRATION_OUT_c0	-1.62932e-05
RESULTS_SEARCH_10_PARAMETERS_MSMS_AUTO_CALIBRATION_OUT_c1minus1	-1.05107e-06
RESULTS_SEARCH_10_PARAMETERS_MSMS_AUTO_CALIBRATION_OUT_c2	0
RESULTS_SEARCH_10_PARAMETERS_MSMS_AUTO_CALIBRATION_OUT_file	3
RESULTS_SEARCH_10_PARAMETERS_MSMS_AUTO_CALIBRATION_OUT_partnumber	5
RESULTS_SEARCH_10_PARAMETERS_MSMS_AUTO_CALIBRATION_OUT_polyorder	1
RESULTS_SEARCH_10_PARAMETERS_MSMS_AUTO_CALIBRATION_OUT_sample	1
RESULTS_SEARCH_10_PARAMETERS_MSMS_AUTO_CALIBRATION_OUT_squareroot	TRUE
RESULTS_SEARCH_10_PARAMETERS_MAX_PRECURSORS_FRAGLET	5
RESULTS_SEARCH_10_PARAMETERS_MAX_PRECURSORS_TAGLET	1
RESULTS_SEARCH_10_PARAMETERS_PRECURSORS_DR_FRAGLET	10
RESULTS_SEARCH_10_PARAMETERS_PRECURSORS_DR_TAGLET	3
RESULTS_SEARCH_10_PARAMETERS_DEFAULT_CHARGE_STATE_1_charge	2
RESULTS_SEARCH_10_PARAMETERS_DEFAULT_CHARGE_STATE_1_probability	1
RESULTS_SEARCH_10_PARAMETERS_DEFAULT_CHARGE_STATE_2_charge	3
RESULTS_SEARCH_10_PARAMETERS_DEFAULT_CHARGE_STATE_2_probability	1
RESULTS_SEARCH_10_PARAMETERS_DEFAULT_CHARGE_STATE_3_charge	4
RESULTS_SEARCH_10_PARAMETERS_DEFAULT_CHARGE_STATE_3_probability	1
RESULTS_SEARCH_10_PARAMETERS_VERSION	5.0.1.0, 4895
RESULTS_SEARCH_10_PARAMETERS_PARAGON_VERSION	5.0.1.0, 4874
RESULTS_SEARCH_10_PARAMETERS_APPLICATION	ProteinPilot(tm) Software
RESULTS_SEARCH_10_PARAMETERS_PROGROUP_alternativedispositionmaximumfoldprobabilitydrop	100
RESULTS_SEARCH_10_PARAMETERS_PROGROUP_alternativedispositionmaximumfoldscoredrop	2
RESULTS_SEARCH_10_PARAMETERS_PROGROUP_autodiscordantpeptidethreshold	0.3
RESULTS_SEARCH_10_PARAMETERS_PROGROUP_bayesconfidencecalclulation	TRUE
RESULTS_SEARCH_10_PARAMETERS_PROGROUP_calibrateconfidence	TRUE
RESULTS_SEARCH_10_PARAMETERS_PROGROUP_compresspeptides	FALSE
RESULTS_SEARCH_10_PARAMETERS_PROGROUP_confidencepercentthresholdforexcludingothersfromquant	15
RESULTS_SEARCH_10_PARAMETERS_PROGROUP_confidencepercentthresholdforincludingselfinquant	15
RESULTS_SEARCH_10_PARAMETERS_PROGROUP_donotstoremspeaklists	FALSE
RESULTS_SEARCH_10_PARAMETERS_PROGROUP_fasta	C:\AB SCIEX\ProteinPilot Data\SearchDatabases\uniprot-zebrafish_with_Clover.fasta
RESULTS_SEARCH_10_PARAMETERS_PROGROUP_featuregroupminpepconf	0.66
RESULTS_SEARCH_10_PARAMETERS_PROGROUP_featuregroupminups	0.47
RESULTS_SEARCH_10_PARAMETERS_PROGROUP_focusingintersection	4
RESULTS_SEARCH_10_PARAMETERS_PROGROUP_focusingminimummatchconfidence	0.1
RESULTS_SEARCH_10_PARAMETERS_PROGROUP_focusingminunusedprotscore	02:24:00
RESULTS_SEARCH_10_PARAMETERS_PROGROUP_focusingsubsetcutoff	6
RESULTS_SEARCH_10_PARAMETERS_PROGROUP_intersection	1.3
RESULTS_SEARCH_10_PARAMETERS_PROGROUP_minimummatchconfidencecutoff	0.001
RESULTS_SEARCH_10_PARAMETERS_PROGROUP_minunusedprotscore	0.0458
RESULTS_SEARCH_10_PARAMETERS_PROGROUP_subsetcutoff	2
RESULTS_SEARCH_10_PARAMETERS_PROGROUP_unusedprotscorethresholdforexcludingothersfromquant	1.3
RESULTS_SEARCH_10_PARAMETERS_PEAKLIST_count	3451
RESULTS_SEARCH_10_PARAMETERS_PEAKLIST_filenumber	3
RESULTS_SEARCH_10_PARAMETERS_PEAKLIST_original_count	3451
RESULTS_SEARCH_10_PARAMETERS_PEAKLIST_originalfilename	C:\AB SCIEX\ProteinPilot Data\Results\Albert\ZX 20200624 6600\ZX 20200624 C4A Control 3.wiff
RESULTS_SEARCH_10_PARAMETERS_PEAKLIST_partnumber	5
RESULTS_SEARCH_10_PARAMETERS_QUANT_TYPE_background_correction	FALSE
RESULTS_SEARCH_10_PARAMETERS_QUANT_TYPE_bias_correction	TRUE
RESULTS_SEARCH_10_PARAMETERS_QUANT_TYPE_keep_extreme_peptides_over_fraction	0
RESULTS_SEARCH_10_PARAMETERS_QUANT_TYPE_low_confidence_check	TRUE
RESULTS_SEARCH_10_PARAMETERS_QUANT_TYPE_low_intensity_check	TRUE
RESULTS_SEARCH_10_PARAMETERS_QUANT_TYPE_median_statistic	TRUE
RESULTS_SEARCH_10_PARAMETERS_QUANT_TYPE_mod_check	TRUE
RESULTS_SEARCH_10_PARAMETERS_QUANT_TYPE_quant_threshold	-1
RESULTS_SEARCH_10_PARAMETERS_QUANT_TYPE_quant_threshold_sn	9
RESULTS_SEARCH_10_PARAMETERS_QUANT_TYPE_separate_searches	FALSE
RESULTS_SEARCH_10_PARAMETERS_QUANT_TYPE_shared_msms_check	TRUE
RESULTS_SEARCH_10_PARAMETERS_PARAGON_METHOD_SETTINGS_UI_SAMPLE_TYPE	Identification
RESULTS_SEARCH_10_PARAMETERS_PARAGON_METHOD_SETTINGS_UI_CYS_ALKYLATION	Iodoacetamide w other Cys mods possible
RESULTS_SEARCH_10_PARAMETERS_PARAGON_METHOD_SETTINGS_UI_DIGESTION	Trypsin + Lys C
RESULTS_SEARCH_10_PARAMETERS_PARAGON_METHOD_SETTINGS_UI_SPECIAL_FACTOR	Gel-based ID
RESULTS_SEARCH_10_PARAMETERS_PARAGON_METHOD_SETTINGS_UI_INSTRUMENT	TripleTOF 6600
RESULTS_SEARCH_10_PARAMETERS_PARAGON_METHOD_SETTINGS_UI_SEARCH_EFFORT	Thorough
RESULTS_SEARCH_10_PARAMETERS_PARAGON_METHOD_SETTINGS_UI_USER_NAME	IMB-MASS02\massuser
RESULTS_SEARCH_10_PARAMETERS_PARAGON_METHOD_SETTINGS_UI_MACHINE_NAME	IMB-MASS02
RESULTS_SEARCH_10_PARAMETERS_PARAGON_METHOD_SETTINGS_UI_SEARCH_ID	6.37467e+17
RESULTS_SEARCH_10_PARAMETERS_PARAGON_METHOD_SETTINGS_UI_START_TIME	2021-01-19 16:09:14
RESULTS_SEARCH_10_PARAMETERS_PARAGON_METHOD_SETTINGS_UI_MIN_UNUSED_PROTSCORE	0.0458
RESULTS_SEARCH_10_PARAMETERS_PARAGON_METHOD_SETTINGS_UI_PSPEP	TRUE
RESULTS_SEARCH_11_time_cpu	83694
RESULTS_SEARCH_11_time_duration	83712
RESULTS_SEARCH_11_version	5.0.1.4874
RESULTS_SEARCH_11_xml:id	SEARCH:1:637466693437157084_5
RESULTS_SEARCH_11_PARAMETERS_chemical_data_edited	FALSE
RESULTS_SEARCH_11_PARAMETERS_do_multiprecursor_search	TRUE
RESULTS_SEARCH_11_PARAMETERS_do_reverse_search	TRUE
RESULTS_SEARCH_11_PARAMETERS_max_quant_labels	35
RESULTS_SEARCH_11_PARAMETERS_maxresults	15
RESULTS_SEARCH_11_PARAMETERS_separate_searches	FALSE
RESULTS_SEARCH_11_PARAMETERS_MSTOLERANCE_type	dalton
RESULTS_SEARCH_11_PARAMETERS_MSTOLERANCE_value	0.05
RESULTS_SEARCH_11_PARAMETERS_MSMSTOLERANCE_type	dalton
RESULTS_SEARCH_11_PARAMETERS_MSMSTOLERANCE_value	0.1
RESULTS_SEARCH_11_PARAMETERS_MS_STANDARD_DEVIATION_type	dalton
RESULTS_SEARCH_11_PARAMETERS_MS_STANDARD_DEVIATION_value	0.0011
RESULTS_SEARCH_11_PARAMETERS_MSMS_STANDARD_DEVIATION_type	dalton
RESULTS_SEARCH_11_PARAMETERS_MSMS_STANDARD_DEVIATION_value	0.01
RESULTS_SEARCH_11_PARAMETERS_FASTA_filename	C:\AB SCIEX\ProteinPilot Data\SearchDatabases\uniprot-zebrafish_with_Clover.fasta
RESULTS_SEARCH_11_PARAMETERS_AUTO_CALIBRATION_ms	TRUE
RESULTS_SEARCH_11_PARAMETERS_AUTO_CALIBRATION_msexport	FALSE
RESULTS_SEARCH_11_PARAMETERS_AUTO_CALIBRATION_msms	TRUE
RESULTS_SEARCH_11_PARAMETERS_AUTO_CALIBRATION_msmstolsdratio	2.75
RESULTS_SEARCH_11_PARAMETERS_AUTO_CALIBRATION_mstolsdratio	7
RESULTS_SEARCH_11_PARAMETERS_AUTO_CALIBRATION_squareroot	TRUE
RESULTS_SEARCH_11_PARAMETERS_AUTO_CALIBRATION_type	dalton
RESULTS_SEARCH_11_PARAMETERS_AUTO_CALIBRATION_MCP_d_s_s_f	0.0666667
RESULTS_SEARCH_11_PARAMETERS_AUTO_CALIBRATION_MCP_d_s_w_f	3
RESULTS_SEARCH_11_PARAMETERS_AUTO_CALIBRATION_MCP_m_f_r_mbc	200
RESULTS_SEARCH_11_PARAMETERS_AUTO_CALIBRATION_MCP_m_m_c	10
RESULTS_SEARCH_11_PARAMETERS_AUTO_CALIBRATION_MCP_m_m_f_s	0.25
RESULTS_SEARCH_11_PARAMETERS_AUTO_CALIBRATION_MCP_m_m_p_f	0.33
RESULTS_SEARCH_11_PARAMETERS_AUTO_CALIBRATION_MCP_m_m_p_rms_f	1
RESULTS_SEARCH_11_PARAMETERS_AUTO_CALIBRATION_MCP_m_p_t_f	1
RESULTS_SEARCH_11_PARAMETERS_AUTO_CALIBRATION_MCP_m_r_h_n_b	15
RESULTS_SEARCH_11_PARAMETERS_AUTO_CALIBRATION_MCP_m_z_n_s	99
RESULTS_SEARCH_11_PARAMETERS_AUTO_CALIBRATION_MCP_m_z_s_mn_f_r	0.0666667
RESULTS_SEARCH_11_PARAMETERS_AUTO_CALIBRATION_MCP_m_z_s_mx_f_r	0.1
RESULTS_SEARCH_11_PARAMETERS_MS_AUTO_CALIBRATION_OUT_avres	-2.00383e-10
RESULTS_SEARCH_11_PARAMETERS_MS_AUTO_CALIBRATION_OUT_c0	0.000104657
RESULTS_SEARCH_11_PARAMETERS_MS_AUTO_CALIBRATION_OUT_c1minus1	-6.44455e-06
RESULTS_SEARCH_11_PARAMETERS_MS_AUTO_CALIBRATION_OUT_c2	0
RESULTS_SEARCH_11_PARAMETERS_MS_AUTO_CALIBRATION_OUT_file	4
RESULTS_SEARCH_11_PARAMETERS_MS_AUTO_CALIBRATION_OUT_partnumber	6
RESULTS_SEARCH_11_PARAMETERS_MS_AUTO_CALIBRATION_OUT_polyorder	1
RESULTS_SEARCH_11_PARAMETERS_MS_AUTO_CALIBRATION_OUT_sample	1
RESULTS_SEARCH_11_PARAMETERS_MS_AUTO_CALIBRATION_OUT_squareroot	TRUE
RESULTS_SEARCH_11_PARAMETERS_MSMS_AUTO_CALIBRATION_OUT_avres	-8.37929e-08
RESULTS_SEARCH_11_PARAMETERS_MSMS_AUTO_CALIBRATION_OUT_c0	-1.2633e-05
RESULTS_SEARCH_11_PARAMETERS_MSMS_AUTO_CALIBRATION_OUT_c1minus1	-9.61595e-07
RESULTS_SEARCH_11_PARAMETERS_MSMS_AUTO_CALIBRATION_OUT_c2	0
RESULTS_SEARCH_11_PARAMETERS_MSMS_AUTO_CALIBRATION_OUT_file	4
RESULTS_SEARCH_11_PARAMETERS_MSMS_AUTO_CALIBRATION_OUT_partnumber	6
RESULTS_SEARCH_11_PARAMETERS_MSMS_AUTO_CALIBRATION_OUT_polyorder	1900-01-01
RESULTS_SEARCH_11_PARAMETERS_MSMS_AUTO_CALIBRATION_OUT_sample	1
RESULTS_SEARCH_11_PARAMETERS_MSMS_AUTO_CALIBRATION_OUT_squareroot	TRUE
RESULTS_SEARCH_11_PARAMETERS_MAX_PRECURSORS_FRAGLET	5
RESULTS_SEARCH_11_PARAMETERS_MAX_PRECURSORS_TAGLET	1
RESULTS_SEARCH_11_PARAMETERS_PRECURSORS_DR_FRAGLET	10
RESULTS_SEARCH_11_PARAMETERS_PRECURSORS_DR_TAGLET	3
RESULTS_SEARCH_11_PARAMETERS_DEFAULT_CHARGE_STATE_1_charge	2
RESULTS_SEARCH_11_PARAMETERS_DEFAULT_CHARGE_STATE_1_probability	1
RESULTS_SEARCH_11_PARAMETERS_DEFAULT_CHARGE_STATE_2_charge	3
RESULTS_SEARCH_11_PARAMETERS_DEFAULT_CHARGE_STATE_2_probability	1
RESULTS_SEARCH_11_PARAMETERS_DEFAULT_CHARGE_STATE_3_charge	4
RESULTS_SEARCH_11_PARAMETERS_DEFAULT_CHARGE_STATE_3_probability	1
RESULTS_SEARCH_11_PARAMETERS_VERSION	5.0.1.0, 4895
RESULTS_SEARCH_11_PARAMETERS_PARAGON_VERSION	5.0.1.0, 4874
RESULTS_SEARCH_11_PARAMETERS_APPLICATION	ProteinPilot(tm) Software
RESULTS_SEARCH_11_PARAMETERS_PROGROUP_alternativedispositionmaximumfoldprobabilitydrop	100
RESULTS_SEARCH_11_PARAMETERS_PROGROUP_alternativedispositionmaximumfoldscoredrop	2
RESULTS_SEARCH_11_PARAMETERS_PROGROUP_autodiscordantpeptidethreshold	0.3
RESULTS_SEARCH_11_PARAMETERS_PROGROUP_bayesconfidencecalclulation	TRUE
RESULTS_SEARCH_11_PARAMETERS_PROGROUP_calibrateconfidence	TRUE
RESULTS_SEARCH_11_PARAMETERS_PROGROUP_compresspeptides	FALSE
RESULTS_SEARCH_11_PARAMETERS_PROGROUP_confidencepercentthresholdforexcludingothersfromquant	15
RESULTS_SEARCH_11_PARAMETERS_PROGROUP_confidencepercentthresholdforincludingselfinquant	15
RESULTS_SEARCH_11_PARAMETERS_PROGROUP_donotstoremspeaklists	FALSE
RESULTS_SEARCH_11_PARAMETERS_PROGROUP_fasta	C:\AB SCIEX\ProteinPilot Data\SearchDatabases\uniprot-zebrafish_with_Clover.fasta
RESULTS_SEARCH_11_PARAMETERS_PROGROUP_featuregroupminpepconf	0.66
RESULTS_SEARCH_11_PARAMETERS_PROGROUP_featuregroupminups	0.47
RESULTS_SEARCH_11_PARAMETERS_PROGROUP_focusingintersection	4
RESULTS_SEARCH_11_PARAMETERS_PROGROUP_focusingminimummatchconfidence	0.1
RESULTS_SEARCH_11_PARAMETERS_PROGROUP_focusingminunusedprotscore	0.1
RESULTS_SEARCH_11_PARAMETERS_PROGROUP_focusingsubsetcutoff	1900-01-06
RESULTS_SEARCH_11_PARAMETERS_PROGROUP_intersection	1900-01-01 07:12:00
RESULTS_SEARCH_11_PARAMETERS_PROGROUP_minimummatchconfidencecutoff	0.001
RESULTS_SEARCH_11_PARAMETERS_PROGROUP_minunusedprotscore	0.0458
RESULTS_SEARCH_11_PARAMETERS_PROGROUP_subsetcutoff	2
RESULTS_SEARCH_11_PARAMETERS_PROGROUP_unusedprotscorethresholdforexcludingothersfromquant	1.3
RESULTS_SEARCH_11_PARAMETERS_PEAKLIST_count	2388
RESULTS_SEARCH_11_PARAMETERS_PEAKLIST_filenumber	4
RESULTS_SEARCH_11_PARAMETERS_PEAKLIST_original_count	2388
RESULTS_SEARCH_11_PARAMETERS_PEAKLIST_originalfilename	C:\AB SCIEX\ProteinPilot Data\Results\Albert\ZX 20200624 6600\ZX 20200624 C4A Control 4.wiff
RESULTS_SEARCH_11_PARAMETERS_PEAKLIST_partnumber	6
RESULTS_SEARCH_11_PARAMETERS_QUANT_TYPE_background_correction	FALSE
RESULTS_SEARCH_11_PARAMETERS_QUANT_TYPE_bias_correction	TRUE
RESULTS_SEARCH_11_PARAMETERS_QUANT_TYPE_keep_extreme_peptides_over_fraction	0
RESULTS_SEARCH_11_PARAMETERS_QUANT_TYPE_low_confidence_check	TRUE
RESULTS_SEARCH_11_PARAMETERS_QUANT_TYPE_low_intensity_check	TRUE
RESULTS_SEARCH_11_PARAMETERS_QUANT_TYPE_median_statistic	TRUE
RESULTS_SEARCH_11_PARAMETERS_QUANT_TYPE_mod_check	TRUE
RESULTS_SEARCH_11_PARAMETERS_QUANT_TYPE_quant_threshold	-1
RESULTS_SEARCH_11_PARAMETERS_QUANT_TYPE_quant_threshold_sn	9
RESULTS_SEARCH_11_PARAMETERS_QUANT_TYPE_separate_searches	FALSE
RESULTS_SEARCH_11_PARAMETERS_QUANT_TYPE_shared_msms_check	TRUE
RESULTS_SEARCH_11_PARAMETERS_PARAGON_METHOD_SETTINGS_UI_SAMPLE_TYPE	Identification
RESULTS_SEARCH_11_PARAMETERS_PARAGON_METHOD_SETTINGS_UI_CYS_ALKYLATION	Iodoacetamide w other Cys mods possible
RESULTS_SEARCH_11_PARAMETERS_PARAGON_METHOD_SETTINGS_UI_DIGESTION	Trypsin + Lys C
RESULTS_SEARCH_11_PARAMETERS_PARAGON_METHOD_SETTINGS_UI_SPECIAL_FACTOR	Gel-based ID
RESULTS_SEARCH_11_PARAMETERS_PARAGON_METHOD_SETTINGS_UI_INSTRUMENT	TripleTOF 6600
RESULTS_SEARCH_11_PARAMETERS_PARAGON_METHOD_SETTINGS_UI_SEARCH_EFFORT	Thorough
RESULTS_SEARCH_11_PARAMETERS_PARAGON_METHOD_SETTINGS_UI_USER_NAME	IMB-MASS02\massuser
RESULTS_SEARCH_11_PARAMETERS_PARAGON_METHOD_SETTINGS_UI_MACHINE_NAME	IMB-MASS02
RESULTS_SEARCH_11_PARAMETERS_PARAGON_METHOD_SETTINGS_UI_SEARCH_ID	6.37467e+17
RESULTS_SEARCH_11_PARAMETERS_PARAGON_METHOD_SETTINGS_UI_START_TIME	2021-01-19 16:09:14
RESULTS_SEARCH_11_PARAMETERS_PARAGON_METHOD_SETTINGS_UI_MIN_UNUSED_PROTSCORE	0.0458
RESULTS_SEARCH_11_PARAMETERS_PARAGON_METHOD_SETTINGS_UI_PSPEP	TRUE
RESULTS_SEARCH_12_time_cpu	218136
RESULTS_SEARCH_12_time_duration	218236
RESULTS_SEARCH_12_version	5.0.1.4874
RESULTS_SEARCH_12_xml:id	SEARCH:2:637466693437157084_5
RESULTS_SEARCH_12_PARAMETERS_chemical_data_edited	FALSE
RESULTS_SEARCH_12_PARAMETERS_do_multiprecursor_search	TRUE
RESULTS_SEARCH_12_PARAMETERS_do_reverse_search	TRUE
RESULTS_SEARCH_12_PARAMETERS_max_quant_labels	35
RESULTS_SEARCH_12_PARAMETERS_maxresults	1900-01-15
RESULTS_SEARCH_12_PARAMETERS_separate_searches	FALSE
RESULTS_SEARCH_12_PARAMETERS_MSTOLERANCE_type	dalton
RESULTS_SEARCH_12_PARAMETERS_MSTOLERANCE_value	0.05
RESULTS_SEARCH_12_PARAMETERS_MSMSTOLERANCE_type	dalton
RESULTS_SEARCH_12_PARAMETERS_MSMSTOLERANCE_value	0.1
RESULTS_SEARCH_12_PARAMETERS_MS_STANDARD_DEVIATION_type	dalton
RESULTS_SEARCH_12_PARAMETERS_MS_STANDARD_DEVIATION_value	0.0011
RESULTS_SEARCH_12_PARAMETERS_MSMS_STANDARD_DEVIATION_type	dalton
RESULTS_SEARCH_12_PARAMETERS_MSMS_STANDARD_DEVIATION_value	0.01
RESULTS_SEARCH_12_PARAMETERS_FASTA_filename	C:\AB SCIEX\ProteinPilot Data\SearchDatabases\uniprot-zebrafish_with_Clover.fasta
RESULTS_SEARCH_12_PARAMETERS_AUTO_CALIBRATION_ms	TRUE
RESULTS_SEARCH_12_PARAMETERS_AUTO_CALIBRATION_msexport	FALSE
RESULTS_SEARCH_12_PARAMETERS_AUTO_CALIBRATION_msms	TRUE
RESULTS_SEARCH_12_PARAMETERS_AUTO_CALIBRATION_msmstolsdratio	2.75
RESULTS_SEARCH_12_PARAMETERS_AUTO_CALIBRATION_mstolsdratio	7
RESULTS_SEARCH_12_PARAMETERS_AUTO_CALIBRATION_squareroot	TRUE
RESULTS_SEARCH_12_PARAMETERS_AUTO_CALIBRATION_type	dalton
RESULTS_SEARCH_12_PARAMETERS_AUTO_CALIBRATION_MCP_d_s_s_f	0.0666667
RESULTS_SEARCH_12_PARAMETERS_AUTO_CALIBRATION_MCP_d_s_w_f	3
RESULTS_SEARCH_12_PARAMETERS_AUTO_CALIBRATION_MCP_m_f_r_mbc	200
RESULTS_SEARCH_12_PARAMETERS_AUTO_CALIBRATION_MCP_m_m_c	10
RESULTS_SEARCH_12_PARAMETERS_AUTO_CALIBRATION_MCP_m_m_f_s	0.25
RESULTS_SEARCH_12_PARAMETERS_AUTO_CALIBRATION_MCP_m_m_p_f	0.33
RESULTS_SEARCH_12_PARAMETERS_AUTO_CALIBRATION_MCP_m_m_p_rms_f	1
RESULTS_SEARCH_12_PARAMETERS_AUTO_CALIBRATION_MCP_m_p_t_f	1
RESULTS_SEARCH_12_PARAMETERS_AUTO_CALIBRATION_MCP_m_r_h_n_b	15
RESULTS_SEARCH_12_PARAMETERS_AUTO_CALIBRATION_MCP_m_z_n_s	99
RESULTS_SEARCH_12_PARAMETERS_AUTO_CALIBRATION_MCP_m_z_s_mn_f_r	0.0666667
RESULTS_SEARCH_12_PARAMETERS_AUTO_CALIBRATION_MCP_m_z_s_mx_f_r	0.1
RESULTS_SEARCH_12_PARAMETERS_MS_AUTO_CALIBRATION_OUT_avres	-2.00383e-10
RESULTS_SEARCH_12_PARAMETERS_MS_AUTO_CALIBRATION_OUT_c0	0.000104657
RESULTS_SEARCH_12_PARAMETERS_MS_AUTO_CALIBRATION_OUT_c1minus1	-6.44455e-06
RESULTS_SEARCH_12_PARAMETERS_MS_AUTO_CALIBRATION_OUT_c2	0
RESULTS_SEARCH_12_PARAMETERS_MS_AUTO_CALIBRATION_OUT_file	4
RESULTS_SEARCH_12_PARAMETERS_MS_AUTO_CALIBRATION_OUT_partnumber	6
RESULTS_SEARCH_12_PARAMETERS_MS_AUTO_CALIBRATION_OUT_polyorder	1
RESULTS_SEARCH_12_PARAMETERS_MS_AUTO_CALIBRATION_OUT_sample	1
RESULTS_SEARCH_12_PARAMETERS_MS_AUTO_CALIBRATION_OUT_squareroot	TRUE
RESULTS_SEARCH_12_PARAMETERS_MSMS_AUTO_CALIBRATION_OUT_avres	-8.37929e-08
RESULTS_SEARCH_12_PARAMETERS_MSMS_AUTO_CALIBRATION_OUT_c0	-1.2633e-05
RESULTS_SEARCH_12_PARAMETERS_MSMS_AUTO_CALIBRATION_OUT_c1minus1	-9.61595e-07
RESULTS_SEARCH_12_PARAMETERS_MSMS_AUTO_CALIBRATION_OUT_c2	0
RESULTS_SEARCH_12_PARAMETERS_MSMS_AUTO_CALIBRATION_OUT_file	4
RESULTS_SEARCH_12_PARAMETERS_MSMS_AUTO_CALIBRATION_OUT_partnumber	6
RESULTS_SEARCH_12_PARAMETERS_MSMS_AUTO_CALIBRATION_OUT_polyorder	1
RESULTS_SEARCH_12_PARAMETERS_MSMS_AUTO_CALIBRATION_OUT_sample	1
RESULTS_SEARCH_12_PARAMETERS_MSMS_AUTO_CALIBRATION_OUT_squareroot	TRUE
RESULTS_SEARCH_12_PARAMETERS_MAX_PRECURSORS_FRAGLET	5
RESULTS_SEARCH_12_PARAMETERS_MAX_PRECURSORS_TAGLET	1
RESULTS_SEARCH_12_PARAMETERS_PRECURSORS_DR_FRAGLET	10
RESULTS_SEARCH_12_PARAMETERS_PRECURSORS_DR_TAGLET	3
RESULTS_SEARCH_12_PARAMETERS_DEFAULT_CHARGE_STATE_1_charge	2
RESULTS_SEARCH_12_PARAMETERS_DEFAULT_CHARGE_STATE_1_probability	1
RESULTS_SEARCH_12_PARAMETERS_DEFAULT_CHARGE_STATE_2_charge	3
RESULTS_SEARCH_12_PARAMETERS_DEFAULT_CHARGE_STATE_2_probability	1
RESULTS_SEARCH_12_PARAMETERS_DEFAULT_CHARGE_STATE_3_charge	4
RESULTS_SEARCH_12_PARAMETERS_DEFAULT_CHARGE_STATE_3_probability	1
RESULTS_SEARCH_12_PARAMETERS_VERSION	5.0.1.0, 4895
RESULTS_SEARCH_12_PARAMETERS_PARAGON_VERSION	5.0.1.0, 4874
RESULTS_SEARCH_12_PARAMETERS_APPLICATION	ProteinPilot(tm) Software
RESULTS_SEARCH_12_PARAMETERS_PROGROUP_alternativedispositionmaximumfoldprobabilitydrop	100
RESULTS_SEARCH_12_PARAMETERS_PROGROUP_alternativedispositionmaximumfoldscoredrop	2
RESULTS_SEARCH_12_PARAMETERS_PROGROUP_autodiscordantpeptidethreshold	0.3
RESULTS_SEARCH_12_PARAMETERS_PROGROUP_bayesconfidencecalclulation	TRUE
RESULTS_SEARCH_12_PARAMETERS_PROGROUP_calibrateconfidence	TRUE
RESULTS_SEARCH_12_PARAMETERS_PROGROUP_compresspeptides	FALSE
RESULTS_SEARCH_12_PARAMETERS_PROGROUP_confidencepercentthresholdforexcludingothersfromquant	1900-01-15
RESULTS_SEARCH_12_PARAMETERS_PROGROUP_confidencepercentthresholdforincludingselfinquant	15
RESULTS_SEARCH_12_PARAMETERS_PROGROUP_donotstoremspeaklists	FALSE
RESULTS_SEARCH_12_PARAMETERS_PROGROUP_fasta	C:\AB SCIEX\ProteinPilot Data\SearchDatabases\uniprot-zebrafish_with_Clover.fasta
RESULTS_SEARCH_12_PARAMETERS_PROGROUP_featuregroupminpepconf	0.66
RESULTS_SEARCH_12_PARAMETERS_PROGROUP_featuregroupminups	0.47
RESULTS_SEARCH_12_PARAMETERS_PROGROUP_focusingintersection	4
RESULTS_SEARCH_12_PARAMETERS_PROGROUP_focusingminimummatchconfidence	0.1
RESULTS_SEARCH_12_PARAMETERS_PROGROUP_focusingminunusedprotscore	0.1
RESULTS_SEARCH_12_PARAMETERS_PROGROUP_focusingsubsetcutoff	6
RESULTS_SEARCH_12_PARAMETERS_PROGROUP_intersection	1.3
RESULTS_SEARCH_12_PARAMETERS_PROGROUP_minimummatchconfidencecutoff	0.001
RESULTS_SEARCH_12_PARAMETERS_PROGROUP_minunusedprotscore	0.0458
RESULTS_SEARCH_12_PARAMETERS_PROGROUP_subsetcutoff	2
RESULTS_SEARCH_12_PARAMETERS_PROGROUP_unusedprotscorethresholdforexcludingothersfromquant	1.3
RESULTS_SEARCH_12_PARAMETERS_PEAKLIST_count	2388
RESULTS_SEARCH_12_PARAMETERS_PEAKLIST_filenumber	4
RESULTS_SEARCH_12_PARAMETERS_PEAKLIST_original_count	2388
RESULTS_SEARCH_12_PARAMETERS_PEAKLIST_originalfilename	C:\AB SCIEX\ProteinPilot Data\Results\Albert\ZX 20200624 6600\ZX 20200624 C4A Control 4.wiff
RESULTS_SEARCH_12_PARAMETERS_PEAKLIST_partnumber	6
RESULTS_SEARCH_12_PARAMETERS_QUANT_TYPE_background_correction	FALSE
RESULTS_SEARCH_12_PARAMETERS_QUANT_TYPE_bias_correction	TRUE
RESULTS_SEARCH_12_PARAMETERS_QUANT_TYPE_keep_extreme_peptides_over_fraction	0
RESULTS_SEARCH_12_PARAMETERS_QUANT_TYPE_low_confidence_check	TRUE
RESULTS_SEARCH_12_PARAMETERS_QUANT_TYPE_low_intensity_check	TRUE
RESULTS_SEARCH_12_PARAMETERS_QUANT_TYPE_median_statistic	TRUE
RESULTS_SEARCH_12_PARAMETERS_QUANT_TYPE_mod_check	TRUE
RESULTS_SEARCH_12_PARAMETERS_QUANT_TYPE_quant_threshold	-1
RESULTS_SEARCH_12_PARAMETERS_QUANT_TYPE_quant_threshold_sn	1900-01-09
RESULTS_SEARCH_12_PARAMETERS_QUANT_TYPE_separate_searches	FALSE
RESULTS_SEARCH_12_PARAMETERS_QUANT_TYPE_shared_msms_check	TRUE
RESULTS_SEARCH_12_PARAMETERS_PARAGON_METHOD_SETTINGS_UI_SAMPLE_TYPE	Identification
RESULTS_SEARCH_12_PARAMETERS_PARAGON_METHOD_SETTINGS_UI_CYS_ALKYLATION	Iodoacetamide w other Cys mods possible
RESULTS_SEARCH_12_PARAMETERS_PARAGON_METHOD_SETTINGS_UI_DIGESTION	Trypsin + Lys C
RESULTS_SEARCH_12_PARAMETERS_PARAGON_METHOD_SETTINGS_UI_SPECIAL_FACTOR	Gel-based ID
RESULTS_SEARCH_12_PARAMETERS_PARAGON_METHOD_SETTINGS_UI_INSTRUMENT	TripleTOF 6600
RESULTS_SEARCH_12_PARAMETERS_PARAGON_METHOD_SETTINGS_UI_SEARCH_EFFORT	Thorough
RESULTS_SEARCH_12_PARAMETERS_PARAGON_METHOD_SETTINGS_UI_USER_NAME	IMB-MASS02\massuser
RESULTS_SEARCH_12_PARAMETERS_PARAGON_METHOD_SETTINGS_UI_MACHINE_NAME	IMB-MASS02
RESULTS_SEARCH_12_PARAMETERS_PARAGON_METHOD_SETTINGS_UI_SEARCH_ID	6.37467e+17
RESULTS_SEARCH_12_PARAMETERS_PARAGON_METHOD_SETTINGS_UI_START_TIME	2021-01-19 16:09:14
RESULTS_SEARCH_12_PARAMETERS_PARAGON_METHOD_SETTINGS_UI_MIN_UNUSED_PROTSCORE	0.0458
RESULTS_SEARCH_12_PARAMETERS_PARAGON_METHOD_SETTINGS_UI_PSPEP	TRUE
RESULTS_SEARCH_13_time_cpu	81604
RESULTS_SEARCH_13_time_duration	81825
RESULTS_SEARCH_13_version	5.0.1.4874
RESULTS_SEARCH_13_xml:id	SEARCH:1:637466693437157084_6
RESULTS_SEARCH_13_PARAMETERS_chemical_data_edited	FALSE
RESULTS_SEARCH_13_PARAMETERS_do_multiprecursor_search	TRUE
RESULTS_SEARCH_13_PARAMETERS_do_reverse_search	TRUE
RESULTS_SEARCH_13_PARAMETERS_max_quant_labels	35
RESULTS_SEARCH_13_PARAMETERS_maxresults	15
RESULTS_SEARCH_13_PARAMETERS_separate_searches	FALSE
RESULTS_SEARCH_13_PARAMETERS_MSTOLERANCE_type	dalton
RESULTS_SEARCH_13_PARAMETERS_MSTOLERANCE_value	0.05
RESULTS_SEARCH_13_PARAMETERS_MSMSTOLERANCE_type	dalton
RESULTS_SEARCH_13_PARAMETERS_MSMSTOLERANCE_value	0.1
RESULTS_SEARCH_13_PARAMETERS_MS_STANDARD_DEVIATION_type	dalton
RESULTS_SEARCH_13_PARAMETERS_MS_STANDARD_DEVIATION_value	0.0011
RESULTS_SEARCH_13_PARAMETERS_MSMS_STANDARD_DEVIATION_type	dalton
RESULTS_SEARCH_13_PARAMETERS_MSMS_STANDARD_DEVIATION_value	0.01
RESULTS_SEARCH_13_PARAMETERS_FASTA_filename	C:\AB SCIEX\ProteinPilot Data\SearchDatabases\uniprot-zebrafish_with_Clover.fasta
RESULTS_SEARCH_13_PARAMETERS_AUTO_CALIBRATION_ms	TRUE
RESULTS_SEARCH_13_PARAMETERS_AUTO_CALIBRATION_msexport	FALSE
RESULTS_SEARCH_13_PARAMETERS_AUTO_CALIBRATION_msms	TRUE
RESULTS_SEARCH_13_PARAMETERS_AUTO_CALIBRATION_msmstolsdratio	2.75
RESULTS_SEARCH_13_PARAMETERS_AUTO_CALIBRATION_mstolsdratio	7
RESULTS_SEARCH_13_PARAMETERS_AUTO_CALIBRATION_squareroot	TRUE
RESULTS_SEARCH_13_PARAMETERS_AUTO_CALIBRATION_type	dalton
RESULTS_SEARCH_13_PARAMETERS_AUTO_CALIBRATION_MCP_d_s_s_f	0.0666667
RESULTS_SEARCH_13_PARAMETERS_AUTO_CALIBRATION_MCP_d_s_w_f	3
RESULTS_SEARCH_13_PARAMETERS_AUTO_CALIBRATION_MCP_m_f_r_mbc	200
RESULTS_SEARCH_13_PARAMETERS_AUTO_CALIBRATION_MCP_m_m_c	10
RESULTS_SEARCH_13_PARAMETERS_AUTO_CALIBRATION_MCP_m_m_f_s	0.25
RESULTS_SEARCH_13_PARAMETERS_AUTO_CALIBRATION_MCP_m_m_p_f	0.33
RESULTS_SEARCH_13_PARAMETERS_AUTO_CALIBRATION_MCP_m_m_p_rms_f	1
RESULTS_SEARCH_13_PARAMETERS_AUTO_CALIBRATION_MCP_m_p_t_f	1
RESULTS_SEARCH_13_PARAMETERS_AUTO_CALIBRATION_MCP_m_r_h_n_b	15
RESULTS_SEARCH_13_PARAMETERS_AUTO_CALIBRATION_MCP_m_z_n_s	99
RESULTS_SEARCH_13_PARAMETERS_AUTO_CALIBRATION_MCP_m_z_s_mn_f_r	0.0666667
RESULTS_SEARCH_13_PARAMETERS_AUTO_CALIBRATION_MCP_m_z_s_mx_f_r	0.1
RESULTS_SEARCH_13_PARAMETERS_MS_AUTO_CALIBRATION_OUT_avres	4.0611e-09
RESULTS_SEARCH_13_PARAMETERS_MS_AUTO_CALIBRATION_OUT_c0	0.000237795
RESULTS_SEARCH_13_PARAMETERS_MS_AUTO_CALIBRATION_OUT_c1minus1	-1.30514e-05
RESULTS_SEARCH_13_PARAMETERS_MS_AUTO_CALIBRATION_OUT_c2	0
RESULTS_SEARCH_13_PARAMETERS_MS_AUTO_CALIBRATION_OUT_file	5
RESULTS_SEARCH_13_PARAMETERS_MS_AUTO_CALIBRATION_OUT_partnumber	7
RESULTS_SEARCH_13_PARAMETERS_MS_AUTO_CALIBRATION_OUT_polyorder	1
RESULTS_SEARCH_13_PARAMETERS_MS_AUTO_CALIBRATION_OUT_sample	1
RESULTS_SEARCH_13_PARAMETERS_MS_AUTO_CALIBRATION_OUT_squareroot	TRUE
RESULTS_SEARCH_13_PARAMETERS_MSMS_AUTO_CALIBRATION_OUT_avres	-8.40971e-08
RESULTS_SEARCH_13_PARAMETERS_MSMS_AUTO_CALIBRATION_OUT_c0	-8.99937e-06
RESULTS_SEARCH_13_PARAMETERS_MSMS_AUTO_CALIBRATION_OUT_c1minus1	-1.86874e-06
RESULTS_SEARCH_13_PARAMETERS_MSMS_AUTO_CALIBRATION_OUT_c2	0
RESULTS_SEARCH_13_PARAMETERS_MSMS_AUTO_CALIBRATION_OUT_file	5
RESULTS_SEARCH_13_PARAMETERS_MSMS_AUTO_CALIBRATION_OUT_partnumber	7
RESULTS_SEARCH_13_PARAMETERS_MSMS_AUTO_CALIBRATION_OUT_polyorder	1
RESULTS_SEARCH_13_PARAMETERS_MSMS_AUTO_CALIBRATION_OUT_sample	1
RESULTS_SEARCH_13_PARAMETERS_MSMS_AUTO_CALIBRATION_OUT_squareroot	TRUE
RESULTS_SEARCH_13_PARAMETERS_MAX_PRECURSORS_FRAGLET	5
RESULTS_SEARCH_13_PARAMETERS_MAX_PRECURSORS_TAGLET	1
RESULTS_SEARCH_13_PARAMETERS_PRECURSORS_DR_FRAGLET	10
RESULTS_SEARCH_13_PARAMETERS_PRECURSORS_DR_TAGLET	3
RESULTS_SEARCH_13_PARAMETERS_DEFAULT_CHARGE_STATE_1_charge	2
RESULTS_SEARCH_13_PARAMETERS_DEFAULT_CHARGE_STATE_1_probability	1
RESULTS_SEARCH_13_PARAMETERS_DEFAULT_CHARGE_STATE_2_charge	3
RESULTS_SEARCH_13_PARAMETERS_DEFAULT_CHARGE_STATE_2_probability	1
RESULTS_SEARCH_13_PARAMETERS_DEFAULT_CHARGE_STATE_3_charge	4
RESULTS_SEARCH_13_PARAMETERS_DEFAULT_CHARGE_STATE_3_probability	1
RESULTS_SEARCH_13_PARAMETERS_VERSION	5.0.1.0, 4895
RESULTS_SEARCH_13_PARAMETERS_PARAGON_VERSION	5.0.1.0, 4874
RESULTS_SEARCH_13_PARAMETERS_APPLICATION	ProteinPilot(tm) Software
RESULTS_SEARCH_13_PARAMETERS_PROGROUP_alternativedispositionmaximumfoldprobabilitydrop	100
RESULTS_SEARCH_13_PARAMETERS_PROGROUP_alternativedispositionmaximumfoldscoredrop	2
RESULTS_SEARCH_13_PARAMETERS_PROGROUP_autodiscordantpeptidethreshold	0.3
RESULTS_SEARCH_13_PARAMETERS_PROGROUP_bayesconfidencecalclulation	TRUE
RESULTS_SEARCH_13_PARAMETERS_PROGROUP_calibrateconfidence	TRUE
RESULTS_SEARCH_13_PARAMETERS_PROGROUP_compresspeptides	FALSE
RESULTS_SEARCH_13_PARAMETERS_PROGROUP_confidencepercentthresholdforexcludingothersfromquant	15
RESULTS_SEARCH_13_PARAMETERS_PROGROUP_confidencepercentthresholdforincludingselfinquant	15
RESULTS_SEARCH_13_PARAMETERS_PROGROUP_donotstoremspeaklists	FALSE
RESULTS_SEARCH_13_PARAMETERS_PROGROUP_fasta	C:\AB SCIEX\ProteinPilot Data\SearchDatabases\uniprot-zebrafish_with_Clover.fasta
RESULTS_SEARCH_13_PARAMETERS_PROGROUP_featuregroupminpepconf	0.66
RESULTS_SEARCH_13_PARAMETERS_PROGROUP_featuregroupminups	0.47
RESULTS_SEARCH_13_PARAMETERS_PROGROUP_focusingintersection	4
RESULTS_SEARCH_13_PARAMETERS_PROGROUP_focusingminimummatchconfidence	0.1
RESULTS_SEARCH_13_PARAMETERS_PROGROUP_focusingminunusedprotscore	0.1
RESULTS_SEARCH_13_PARAMETERS_PROGROUP_focusingsubsetcutoff	6
RESULTS_SEARCH_13_PARAMETERS_PROGROUP_intersection	1.3
RESULTS_SEARCH_13_PARAMETERS_PROGROUP_minimummatchconfidencecutoff	0.001
RESULTS_SEARCH_13_PARAMETERS_PROGROUP_minunusedprotscore	0.0458
RESULTS_SEARCH_13_PARAMETERS_PROGROUP_subsetcutoff	2
RESULTS_SEARCH_13_PARAMETERS_PROGROUP_unusedprotscorethresholdforexcludingothersfromquant	1.3
RESULTS_SEARCH_13_PARAMETERS_PEAKLIST_count	2185
RESULTS_SEARCH_13_PARAMETERS_PEAKLIST_filenumber	5
RESULTS_SEARCH_13_PARAMETERS_PEAKLIST_original_count	2185
RESULTS_SEARCH_13_PARAMETERS_PEAKLIST_originalfilename	C:\AB SCIEX\ProteinPilot Data\Results\Albert\ZX 20200624 6600\ZX 20200624 C4A Control 5.wiff
RESULTS_SEARCH_13_PARAMETERS_PEAKLIST_partnumber	7
RESULTS_SEARCH_13_PARAMETERS_QUANT_TYPE_background_correction	FALSE
RESULTS_SEARCH_13_PARAMETERS_QUANT_TYPE_bias_correction	TRUE
RESULTS_SEARCH_13_PARAMETERS_QUANT_TYPE_keep_extreme_peptides_over_fraction	00:00:00
RESULTS_SEARCH_13_PARAMETERS_QUANT_TYPE_low_confidence_check	TRUE
RESULTS_SEARCH_13_PARAMETERS_QUANT_TYPE_low_intensity_check	TRUE
RESULTS_SEARCH_13_PARAMETERS_QUANT_TYPE_median_statistic	TRUE
RESULTS_SEARCH_13_PARAMETERS_QUANT_TYPE_mod_check	TRUE
RESULTS_SEARCH_13_PARAMETERS_QUANT_TYPE_quant_threshold	1899-12-29
RESULTS_SEARCH_13_PARAMETERS_QUANT_TYPE_quant_threshold_sn	9
RESULTS_SEARCH_13_PARAMETERS_QUANT_TYPE_separate_searches	FALSE
RESULTS_SEARCH_13_PARAMETERS_QUANT_TYPE_shared_msms_check	TRUE
RESULTS_SEARCH_13_PARAMETERS_PARAGON_METHOD_SETTINGS_UI_SAMPLE_TYPE	Identification
RESULTS_SEARCH_13_PARAMETERS_PARAGON_METHOD_SETTINGS_UI_CYS_ALKYLATION	Iodoacetamide w other Cys mods possible
RESULTS_SEARCH_13_PARAMETERS_PARAGON_METHOD_SETTINGS_UI_DIGESTION	Trypsin + Lys C
RESULTS_SEARCH_13_PARAMETERS_PARAGON_METHOD_SETTINGS_UI_SPECIAL_FACTOR	Gel-based ID
RESULTS_SEARCH_13_PARAMETERS_PARAGON_METHOD_SETTINGS_UI_INSTRUMENT	TripleTOF 6600
RESULTS_SEARCH_13_PARAMETERS_PARAGON_METHOD_SETTINGS_UI_SEARCH_EFFORT	Thorough
RESULTS_SEARCH_13_PARAMETERS_PARAGON_METHOD_SETTINGS_UI_USER_NAME	IMB-MASS02\massuser
RESULTS_SEARCH_13_PARAMETERS_PARAGON_METHOD_SETTINGS_UI_MACHINE_NAME	IMB-MASS02
RESULTS_SEARCH_13_PARAMETERS_PARAGON_METHOD_SETTINGS_UI_SEARCH_ID	6.37467e+17
RESULTS_SEARCH_13_PARAMETERS_PARAGON_METHOD_SETTINGS_UI_START_TIME	2021-01-19 16:09:14
RESULTS_SEARCH_13_PARAMETERS_PARAGON_METHOD_SETTINGS_UI_MIN_UNUSED_PROTSCORE	0.0458
RESULTS_SEARCH_13_PARAMETERS_PARAGON_METHOD_SETTINGS_UI_PSPEP	TRUE
RESULTS_SEARCH_14_time_cpu	153177
RESULTS_SEARCH_14_time_duration	153244
RESULTS_SEARCH_14_version	5.0.1.4874
RESULTS_SEARCH_14_xml:id	SEARCH:2:637466693437157084_6
RESULTS_SEARCH_14_PARAMETERS_chemical_data_edited	FALSE
RESULTS_SEARCH_14_PARAMETERS_do_multiprecursor_search	TRUE
RESULTS_SEARCH_14_PARAMETERS_do_reverse_search	TRUE
RESULTS_SEARCH_14_PARAMETERS_max_quant_labels	35
RESULTS_SEARCH_14_PARAMETERS_maxresults	15
RESULTS_SEARCH_14_PARAMETERS_separate_searches	FALSE
RESULTS_SEARCH_14_PARAMETERS_MSTOLERANCE_type	dalton
RESULTS_SEARCH_14_PARAMETERS_MSTOLERANCE_value	0.05
RESULTS_SEARCH_14_PARAMETERS_MSMSTOLERANCE_type	dalton
RESULTS_SEARCH_14_PARAMETERS_MSMSTOLERANCE_value	0.1
RESULTS_SEARCH_14_PARAMETERS_MS_STANDARD_DEVIATION_type	dalton
RESULTS_SEARCH_14_PARAMETERS_MS_STANDARD_DEVIATION_value	0.0011
RESULTS_SEARCH_14_PARAMETERS_MSMS_STANDARD_DEVIATION_type	dalton
RESULTS_SEARCH_14_PARAMETERS_MSMS_STANDARD_DEVIATION_value	0.01
RESULTS_SEARCH_14_PARAMETERS_FASTA_filename	C:\AB SCIEX\ProteinPilot Data\SearchDatabases\uniprot-zebrafish_with_Clover.fasta
RESULTS_SEARCH_14_PARAMETERS_AUTO_CALIBRATION_ms	TRUE
RESULTS_SEARCH_14_PARAMETERS_AUTO_CALIBRATION_msexport	FALSE
RESULTS_SEARCH_14_PARAMETERS_AUTO_CALIBRATION_msms	TRUE
RESULTS_SEARCH_14_PARAMETERS_AUTO_CALIBRATION_msmstolsdratio	2.75
RESULTS_SEARCH_14_PARAMETERS_AUTO_CALIBRATION_mstolsdratio	7
RESULTS_SEARCH_14_PARAMETERS_AUTO_CALIBRATION_squareroot	TRUE
RESULTS_SEARCH_14_PARAMETERS_AUTO_CALIBRATION_type	dalton
RESULTS_SEARCH_14_PARAMETERS_AUTO_CALIBRATION_MCP_d_s_s_f	0.0666667
RESULTS_SEARCH_14_PARAMETERS_AUTO_CALIBRATION_MCP_d_s_w_f	3
RESULTS_SEARCH_14_PARAMETERS_AUTO_CALIBRATION_MCP_m_f_r_mbc	200
RESULTS_SEARCH_14_PARAMETERS_AUTO_CALIBRATION_MCP_m_m_c	10
RESULTS_SEARCH_14_PARAMETERS_AUTO_CALIBRATION_MCP_m_m_f_s	0.25
RESULTS_SEARCH_14_PARAMETERS_AUTO_CALIBRATION_MCP_m_m_p_f	0.33
RESULTS_SEARCH_14_PARAMETERS_AUTO_CALIBRATION_MCP_m_m_p_rms_f	1
RESULTS_SEARCH_14_PARAMETERS_AUTO_CALIBRATION_MCP_m_p_t_f	1
RESULTS_SEARCH_14_PARAMETERS_AUTO_CALIBRATION_MCP_m_r_h_n_b	15
RESULTS_SEARCH_14_PARAMETERS_AUTO_CALIBRATION_MCP_m_z_n_s	99
RESULTS_SEARCH_14_PARAMETERS_AUTO_CALIBRATION_MCP_m_z_s_mn_f_r	0.0666667
RESULTS_SEARCH_14_PARAMETERS_AUTO_CALIBRATION_MCP_m_z_s_mx_f_r	0.1
RESULTS_SEARCH_14_PARAMETERS_MS_AUTO_CALIBRATION_OUT_avres	4.0611e-09
RESULTS_SEARCH_14_PARAMETERS_MS_AUTO_CALIBRATION_OUT_c0	0.000237795
RESULTS_SEARCH_14_PARAMETERS_MS_AUTO_CALIBRATION_OUT_c1minus1	-1.30514e-05
RESULTS_SEARCH_14_PARAMETERS_MS_AUTO_CALIBRATION_OUT_c2	0
RESULTS_SEARCH_14_PARAMETERS_MS_AUTO_CALIBRATION_OUT_file	5
RESULTS_SEARCH_14_PARAMETERS_MS_AUTO_CALIBRATION_OUT_partnumber	7
RESULTS_SEARCH_14_PARAMETERS_MS_AUTO_CALIBRATION_OUT_polyorder	1
RESULTS_SEARCH_14_PARAMETERS_MS_AUTO_CALIBRATION_OUT_sample	1
RESULTS_SEARCH_14_PARAMETERS_MS_AUTO_CALIBRATION_OUT_squareroot	TRUE
RESULTS_SEARCH_14_PARAMETERS_MSMS_AUTO_CALIBRATION_OUT_avres	-8.40971e-08
RESULTS_SEARCH_14_PARAMETERS_MSMS_AUTO_CALIBRATION_OUT_c0	-8.99937e-06
RESULTS_SEARCH_14_PARAMETERS_MSMS_AUTO_CALIBRATION_OUT_c1minus1	-1.86874e-06
RESULTS_SEARCH_14_PARAMETERS_MSMS_AUTO_CALIBRATION_OUT_c2	0
RESULTS_SEARCH_14_PARAMETERS_MSMS_AUTO_CALIBRATION_OUT_file	5
RESULTS_SEARCH_14_PARAMETERS_MSMS_AUTO_CALIBRATION_OUT_partnumber	7
RESULTS_SEARCH_14_PARAMETERS_MSMS_AUTO_CALIBRATION_OUT_polyorder	1
RESULTS_SEARCH_14_PARAMETERS_MSMS_AUTO_CALIBRATION_OUT_sample	1
RESULTS_SEARCH_14_PARAMETERS_MSMS_AUTO_CALIBRATION_OUT_squareroot	TRUE
RESULTS_SEARCH_14_PARAMETERS_MAX_PRECURSORS_FRAGLET	5
RESULTS_SEARCH_14_PARAMETERS_MAX_PRECURSORS_TAGLET	1
RESULTS_SEARCH_14_PARAMETERS_PRECURSORS_DR_FRAGLET	10
RESULTS_SEARCH_14_PARAMETERS_PRECURSORS_DR_TAGLET	3
RESULTS_SEARCH_14_PARAMETERS_DEFAULT_CHARGE_STATE_1_charge	2
RESULTS_SEARCH_14_PARAMETERS_DEFAULT_CHARGE_STATE_1_probability	1
RESULTS_SEARCH_14_PARAMETERS_DEFAULT_CHARGE_STATE_2_charge	3
RESULTS_SEARCH_14_PARAMETERS_DEFAULT_CHARGE_STATE_2_probability	1
RESULTS_SEARCH_14_PARAMETERS_DEFAULT_CHARGE_STATE_3_charge	4
RESULTS_SEARCH_14_PARAMETERS_DEFAULT_CHARGE_STATE_3_probability	1
RESULTS_SEARCH_14_PARAMETERS_VERSION	5.0.1.0, 4895
RESULTS_SEARCH_14_PARAMETERS_PARAGON_VERSION	5.0.1.0, 4874
RESULTS_SEARCH_14_PARAMETERS_APPLICATION	ProteinPilot(tm) Software
RESULTS_SEARCH_14_PARAMETERS_PROGROUP_alternativedispositionmaximumfoldprobabilitydrop	100
RESULTS_SEARCH_14_PARAMETERS_PROGROUP_alternativedispositionmaximumfoldscoredrop	2
RESULTS_SEARCH_14_PARAMETERS_PROGROUP_autodiscordantpeptidethreshold	0.3
RESULTS_SEARCH_14_PARAMETERS_PROGROUP_bayesconfidencecalclulation	TRUE
RESULTS_SEARCH_14_PARAMETERS_PROGROUP_calibrateconfidence	TRUE
RESULTS_SEARCH_14_PARAMETERS_PROGROUP_compresspeptides	FALSE
RESULTS_SEARCH_14_PARAMETERS_PROGROUP_confidencepercentthresholdforexcludingothersfromquant	15
RESULTS_SEARCH_14_PARAMETERS_PROGROUP_confidencepercentthresholdforincludingselfinquant	15
RESULTS_SEARCH_14_PARAMETERS_PROGROUP_donotstoremspeaklists	FALSE
RESULTS_SEARCH_14_PARAMETERS_PROGROUP_fasta	C:\AB SCIEX\ProteinPilot Data\SearchDatabases\uniprot-zebrafish_with_Clover.fasta
RESULTS_SEARCH_14_PARAMETERS_PROGROUP_featuregroupminpepconf	0.66
RESULTS_SEARCH_14_PARAMETERS_PROGROUP_featuregroupminups	0.47
RESULTS_SEARCH_14_PARAMETERS_PROGROUP_focusingintersection	4
RESULTS_SEARCH_14_PARAMETERS_PROGROUP_focusingminimummatchconfidence	0.1
RESULTS_SEARCH_14_PARAMETERS_PROGROUP_focusingminunusedprotscore	0.1
RESULTS_SEARCH_14_PARAMETERS_PROGROUP_focusingsubsetcutoff	6
RESULTS_SEARCH_14_PARAMETERS_PROGROUP_intersection	1.3
RESULTS_SEARCH_14_PARAMETERS_PROGROUP_minimummatchconfidencecutoff	0.001
RESULTS_SEARCH_14_PARAMETERS_PROGROUP_minunusedprotscore	0.0458
RESULTS_SEARCH_14_PARAMETERS_PROGROUP_subsetcutoff	2
RESULTS_SEARCH_14_PARAMETERS_PROGROUP_unusedprotscorethresholdforexcludingothersfromquant	1.3
RESULTS_SEARCH_14_PARAMETERS_PEAKLIST_count	2185
RESULTS_SEARCH_14_PARAMETERS_PEAKLIST_filenumber	5
RESULTS_SEARCH_14_PARAMETERS_PEAKLIST_original_count	2185
RESULTS_SEARCH_14_PARAMETERS_PEAKLIST_originalfilename	C:\AB SCIEX\ProteinPilot Data\Results\Albert\ZX 20200624 6600\ZX 20200624 C4A Control 5.wiff
RESULTS_SEARCH_14_PARAMETERS_PEAKLIST_partnumber	7
RESULTS_SEARCH_14_PARAMETERS_QUANT_TYPE_background_correction	FALSE
RESULTS_SEARCH_14_PARAMETERS_QUANT_TYPE_bias_correction	TRUE
RESULTS_SEARCH_14_PARAMETERS_QUANT_TYPE_keep_extreme_peptides_over_fraction	00:00:00
RESULTS_SEARCH_14_PARAMETERS_QUANT_TYPE_low_confidence_check	TRUE
RESULTS_SEARCH_14_PARAMETERS_QUANT_TYPE_low_intensity_check	TRUE
RESULTS_SEARCH_14_PARAMETERS_QUANT_TYPE_median_statistic	TRUE
RESULTS_SEARCH_14_PARAMETERS_QUANT_TYPE_mod_check	TRUE
RESULTS_SEARCH_14_PARAMETERS_QUANT_TYPE_quant_threshold	-1
RESULTS_SEARCH_14_PARAMETERS_QUANT_TYPE_quant_threshold_sn	9
RESULTS_SEARCH_14_PARAMETERS_QUANT_TYPE_separate_searches	FALSE
RESULTS_SEARCH_14_PARAMETERS_QUANT_TYPE_shared_msms_check	TRUE
RESULTS_SEARCH_14_PARAMETERS_PARAGON_METHOD_SETTINGS_UI_SAMPLE_TYPE	Identification
RESULTS_SEARCH_14_PARAMETERS_PARAGON_METHOD_SETTINGS_UI_CYS_ALKYLATION	Iodoacetamide w other Cys mods possible
RESULTS_SEARCH_14_PARAMETERS_PARAGON_METHOD_SETTINGS_UI_DIGESTION	Trypsin + Lys C
RESULTS_SEARCH_14_PARAMETERS_PARAGON_METHOD_SETTINGS_UI_SPECIAL_FACTOR	Gel-based ID
RESULTS_SEARCH_14_PARAMETERS_PARAGON_METHOD_SETTINGS_UI_INSTRUMENT	TripleTOF 6600
RESULTS_SEARCH_14_PARAMETERS_PARAGON_METHOD_SETTINGS_UI_SEARCH_EFFORT	Thorough
RESULTS_SEARCH_14_PARAMETERS_PARAGON_METHOD_SETTINGS_UI_USER_NAME	IMB-MASS02\massuser
RESULTS_SEARCH_14_PARAMETERS_PARAGON_METHOD_SETTINGS_UI_MACHINE_NAME	IMB-MASS02
RESULTS_SEARCH_14_PARAMETERS_PARAGON_METHOD_SETTINGS_UI_SEARCH_ID	6.37467e+17
RESULTS_SEARCH_14_PARAMETERS_PARAGON_METHOD_SETTINGS_UI_START_TIME	2021-01-19 16:09:14
RESULTS_SEARCH_14_PARAMETERS_PARAGON_METHOD_SETTINGS_UI_MIN_UNUSED_PROTSCORE	0.0458
RESULTS_SEARCH_14_PARAMETERS_PARAGON_METHOD_SETTINGS_UI_PSPEP	TRUE
RESULTS_SEARCH_15_time_cpu	118997
RESULTS_SEARCH_15_time_duration	2228-01-12
RESULTS_SEARCH_15_version	5.0.1.4874
RESULTS_SEARCH_15_xml:id	SEARCH:1:637466693437157084_7
RESULTS_SEARCH_15_PARAMETERS_chemical_data_edited	FALSE
RESULTS_SEARCH_15_PARAMETERS_do_multiprecursor_search	TRUE
RESULTS_SEARCH_15_PARAMETERS_do_reverse_search	TRUE
RESULTS_SEARCH_15_PARAMETERS_max_quant_labels	35
RESULTS_SEARCH_15_PARAMETERS_maxresults	15
RESULTS_SEARCH_15_PARAMETERS_separate_searches	FALSE
RESULTS_SEARCH_15_PARAMETERS_MSTOLERANCE_type	dalton
RESULTS_SEARCH_15_PARAMETERS_MSTOLERANCE_value	0.05
RESULTS_SEARCH_15_PARAMETERS_MSMSTOLERANCE_type	dalton
RESULTS_SEARCH_15_PARAMETERS_MSMSTOLERANCE_value	0.1
RESULTS_SEARCH_15_PARAMETERS_MS_STANDARD_DEVIATION_type	dalton
RESULTS_SEARCH_15_PARAMETERS_MS_STANDARD_DEVIATION_value	0.0011
RESULTS_SEARCH_15_PARAMETERS_MSMS_STANDARD_DEVIATION_type	dalton
RESULTS_SEARCH_15_PARAMETERS_MSMS_STANDARD_DEVIATION_value	0.01
RESULTS_SEARCH_15_PARAMETERS_FASTA_filename	C:\AB SCIEX\ProteinPilot Data\SearchDatabases\uniprot-zebrafish_with_Clover.fasta
RESULTS_SEARCH_15_PARAMETERS_AUTO_CALIBRATION_ms	TRUE
RESULTS_SEARCH_15_PARAMETERS_AUTO_CALIBRATION_msexport	FALSE
RESULTS_SEARCH_15_PARAMETERS_AUTO_CALIBRATION_msms	TRUE
RESULTS_SEARCH_15_PARAMETERS_AUTO_CALIBRATION_msmstolsdratio	2.75
RESULTS_SEARCH_15_PARAMETERS_AUTO_CALIBRATION_mstolsdratio	7
RESULTS_SEARCH_15_PARAMETERS_AUTO_CALIBRATION_squareroot	TRUE
RESULTS_SEARCH_15_PARAMETERS_AUTO_CALIBRATION_type	dalton
RESULTS_SEARCH_15_PARAMETERS_AUTO_CALIBRATION_MCP_d_s_s_f	0.0666667
RESULTS_SEARCH_15_PARAMETERS_AUTO_CALIBRATION_MCP_d_s_w_f	3
RESULTS_SEARCH_15_PARAMETERS_AUTO_CALIBRATION_MCP_m_f_r_mbc	200
RESULTS_SEARCH_15_PARAMETERS_AUTO_CALIBRATION_MCP_m_m_c	10
RESULTS_SEARCH_15_PARAMETERS_AUTO_CALIBRATION_MCP_m_m_f_s	0.25
RESULTS_SEARCH_15_PARAMETERS_AUTO_CALIBRATION_MCP_m_m_p_f	0.33
RESULTS_SEARCH_15_PARAMETERS_AUTO_CALIBRATION_MCP_m_m_p_rms_f	1
RESULTS_SEARCH_15_PARAMETERS_AUTO_CALIBRATION_MCP_m_p_t_f	1
RESULTS_SEARCH_15_PARAMETERS_AUTO_CALIBRATION_MCP_m_r_h_n_b	15
RESULTS_SEARCH_15_PARAMETERS_AUTO_CALIBRATION_MCP_m_z_n_s	99
RESULTS_SEARCH_15_PARAMETERS_AUTO_CALIBRATION_MCP_m_z_s_mn_f_r	0.0666667
RESULTS_SEARCH_15_PARAMETERS_AUTO_CALIBRATION_MCP_m_z_s_mx_f_r	0.1
RESULTS_SEARCH_15_PARAMETERS_MS_AUTO_CALIBRATION_OUT_avres	-3.41853e-10
RESULTS_SEARCH_15_PARAMETERS_MS_AUTO_CALIBRATION_OUT_c0	0.000121881
RESULTS_SEARCH_15_PARAMETERS_MS_AUTO_CALIBRATION_OUT_c1minus1	-9.25326e-06
RESULTS_SEARCH_15_PARAMETERS_MS_AUTO_CALIBRATION_OUT_c2	0
RESULTS_SEARCH_15_PARAMETERS_MS_AUTO_CALIBRATION_OUT_file	5
RESULTS_SEARCH_15_PARAMETERS_MS_AUTO_CALIBRATION_OUT_partnumber	8
RESULTS_SEARCH_15_PARAMETERS_MS_AUTO_CALIBRATION_OUT_polyorder	1
RESULTS_SEARCH_15_PARAMETERS_MS_AUTO_CALIBRATION_OUT_sample	1
RESULTS_SEARCH_15_PARAMETERS_MS_AUTO_CALIBRATION_OUT_squareroot	TRUE
RESULTS_SEARCH_15_PARAMETERS_MSMS_AUTO_CALIBRATION_OUT_avres	-3.72046e-08
RESULTS_SEARCH_15_PARAMETERS_MSMS_AUTO_CALIBRATION_OUT_c0	-6.00454e-06
RESULTS_SEARCH_15_PARAMETERS_MSMS_AUTO_CALIBRATION_OUT_c1minus1	-2.22616e-06
RESULTS_SEARCH_15_PARAMETERS_MSMS_AUTO_CALIBRATION_OUT_c2	0
RESULTS_SEARCH_15_PARAMETERS_MSMS_AUTO_CALIBRATION_OUT_file	5
RESULTS_SEARCH_15_PARAMETERS_MSMS_AUTO_CALIBRATION_OUT_partnumber	8
RESULTS_SEARCH_15_PARAMETERS_MSMS_AUTO_CALIBRATION_OUT_polyorder	1
RESULTS_SEARCH_15_PARAMETERS_MSMS_AUTO_CALIBRATION_OUT_sample	1
RESULTS_SEARCH_15_PARAMETERS_MSMS_AUTO_CALIBRATION_OUT_squareroot	TRUE
RESULTS_SEARCH_15_PARAMETERS_MAX_PRECURSORS_FRAGLET	5
RESULTS_SEARCH_15_PARAMETERS_MAX_PRECURSORS_TAGLET	1
RESULTS_SEARCH_15_PARAMETERS_PRECURSORS_DR_FRAGLET	10
RESULTS_SEARCH_15_PARAMETERS_PRECURSORS_DR_TAGLET	3
RESULTS_SEARCH_15_PARAMETERS_DEFAULT_CHARGE_STATE_1_charge	2
RESULTS_SEARCH_15_PARAMETERS_DEFAULT_CHARGE_STATE_1_probability	1
RESULTS_SEARCH_15_PARAMETERS_DEFAULT_CHARGE_STATE_2_charge	3
RESULTS_SEARCH_15_PARAMETERS_DEFAULT_CHARGE_STATE_2_probability	1
RESULTS_SEARCH_15_PARAMETERS_DEFAULT_CHARGE_STATE_3_charge	4
RESULTS_SEARCH_15_PARAMETERS_DEFAULT_CHARGE_STATE_3_probability	1
RESULTS_SEARCH_15_PARAMETERS_VERSION	5.0.1.0, 4895
RESULTS_SEARCH_15_PARAMETERS_PARAGON_VERSION	5.0.1.0, 4874
RESULTS_SEARCH_15_PARAMETERS_APPLICATION	ProteinPilot(tm) Software
RESULTS_SEARCH_15_PARAMETERS_PROGROUP_alternativedispositionmaximumfoldprobabilitydrop	100
RESULTS_SEARCH_15_PARAMETERS_PROGROUP_alternativedispositionmaximumfoldscoredrop	2
RESULTS_SEARCH_15_PARAMETERS_PROGROUP_autodiscordantpeptidethreshold	0.3
RESULTS_SEARCH_15_PARAMETERS_PROGROUP_bayesconfidencecalclulation	TRUE
RESULTS_SEARCH_15_PARAMETERS_PROGROUP_calibrateconfidence	TRUE
RESULTS_SEARCH_15_PARAMETERS_PROGROUP_compresspeptides	FALSE
RESULTS_SEARCH_15_PARAMETERS_PROGROUP_confidencepercentthresholdforexcludingothersfromquant	15
RESULTS_SEARCH_15_PARAMETERS_PROGROUP_confidencepercentthresholdforincludingselfinquant	15
RESULTS_SEARCH_15_PARAMETERS_PROGROUP_donotstoremspeaklists	FALSE
RESULTS_SEARCH_15_PARAMETERS_PROGROUP_fasta	C:\AB SCIEX\ProteinPilot Data\SearchDatabases\uniprot-zebrafish_with_Clover.fasta
RESULTS_SEARCH_15_PARAMETERS_PROGROUP_featuregroupminpepconf	0.66
RESULTS_SEARCH_15_PARAMETERS_PROGROUP_featuregroupminups	0.47
RESULTS_SEARCH_15_PARAMETERS_PROGROUP_focusingintersection	4
RESULTS_SEARCH_15_PARAMETERS_PROGROUP_focusingminimummatchconfidence	0.1
RESULTS_SEARCH_15_PARAMETERS_PROGROUP_focusingminunusedprotscore	0.1
RESULTS_SEARCH_15_PARAMETERS_PROGROUP_focusingsubsetcutoff	6
RESULTS_SEARCH_15_PARAMETERS_PROGROUP_intersection	1.3
RESULTS_SEARCH_15_PARAMETERS_PROGROUP_minimummatchconfidencecutoff	0.001
RESULTS_SEARCH_15_PARAMETERS_PROGROUP_minunusedprotscore	0.0458
RESULTS_SEARCH_15_PARAMETERS_PROGROUP_subsetcutoff	2
RESULTS_SEARCH_15_PARAMETERS_PROGROUP_unusedprotscorethresholdforexcludingothersfromquant	1.3
RESULTS_SEARCH_15_PARAMETERS_PEAKLIST_count	2184
RESULTS_SEARCH_15_PARAMETERS_PEAKLIST_filenumber	5
RESULTS_SEARCH_15_PARAMETERS_PEAKLIST_original_count	2184
RESULTS_SEARCH_15_PARAMETERS_PEAKLIST_originalfilename	C:\AB SCIEX\ProteinPilot Data\Results\Albert\ZX 20200624 6600\ZX 20200624 C4A Control 5.wiff
RESULTS_SEARCH_15_PARAMETERS_PEAKLIST_partnumber	8
RESULTS_SEARCH_15_PARAMETERS_QUANT_TYPE_background_correction	FALSE
RESULTS_SEARCH_15_PARAMETERS_QUANT_TYPE_bias_correction	TRUE
RESULTS_SEARCH_15_PARAMETERS_QUANT_TYPE_keep_extreme_peptides_over_fraction	0
RESULTS_SEARCH_15_PARAMETERS_QUANT_TYPE_low_confidence_check	TRUE
RESULTS_SEARCH_15_PARAMETERS_QUANT_TYPE_low_intensity_check	TRUE
RESULTS_SEARCH_15_PARAMETERS_QUANT_TYPE_median_statistic	TRUE
RESULTS_SEARCH_15_PARAMETERS_QUANT_TYPE_mod_check	TRUE
RESULTS_SEARCH_15_PARAMETERS_QUANT_TYPE_quant_threshold	-1
RESULTS_SEARCH_15_PARAMETERS_QUANT_TYPE_quant_threshold_sn	9
RESULTS_SEARCH_15_PARAMETERS_QUANT_TYPE_separate_searches	FALSE
RESULTS_SEARCH_15_PARAMETERS_QUANT_TYPE_shared_msms_check	TRUE
RESULTS_SEARCH_15_PARAMETERS_PARAGON_METHOD_SETTINGS_UI_SAMPLE_TYPE	Identification
RESULTS_SEARCH_15_PARAMETERS_PARAGON_METHOD_SETTINGS_UI_CYS_ALKYLATION	Iodoacetamide w other Cys mods possible
RESULTS_SEARCH_15_PARAMETERS_PARAGON_METHOD_SETTINGS_UI_DIGESTION	Trypsin + Lys C
RESULTS_SEARCH_15_PARAMETERS_PARAGON_METHOD_SETTINGS_UI_SPECIAL_FACTOR	Gel-based ID
RESULTS_SEARCH_15_PARAMETERS_PARAGON_METHOD_SETTINGS_UI_INSTRUMENT	TripleTOF 6600
RESULTS_SEARCH_15_PARAMETERS_PARAGON_METHOD_SETTINGS_UI_SEARCH_EFFORT	Thorough
RESULTS_SEARCH_15_PARAMETERS_PARAGON_METHOD_SETTINGS_UI_USER_NAME	IMB-MASS02\massuser
RESULTS_SEARCH_15_PARAMETERS_PARAGON_METHOD_SETTINGS_UI_MACHINE_NAME	IMB-MASS02
RESULTS_SEARCH_15_PARAMETERS_PARAGON_METHOD_SETTINGS_UI_SEARCH_ID	6.37467e+17
RESULTS_SEARCH_15_PARAMETERS_PARAGON_METHOD_SETTINGS_UI_START_TIME	2021-01-19 16:09:14
RESULTS_SEARCH_15_PARAMETERS_PARAGON_METHOD_SETTINGS_UI_MIN_UNUSED_PROTSCORE	0.0458
RESULTS_SEARCH_15_PARAMETERS_PARAGON_METHOD_SETTINGS_UI_PSPEP	TRUE
RESULTS_SEARCH_16_time_cpu	226139
RESULTS_SEARCH_16_time_duration	226286
RESULTS_SEARCH_16_version	5.0.1.4874
RESULTS_SEARCH_16_xml:id	SEARCH:2:637466693437157084_7
RESULTS_SEARCH_16_PARAMETERS_chemical_data_edited	FALSE
RESULTS_SEARCH_16_PARAMETERS_do_multiprecursor_search	TRUE
RESULTS_SEARCH_16_PARAMETERS_do_reverse_search	TRUE
RESULTS_SEARCH_16_PARAMETERS_max_quant_labels	35
RESULTS_SEARCH_16_PARAMETERS_maxresults	15
RESULTS_SEARCH_16_PARAMETERS_separate_searches	FALSE
RESULTS_SEARCH_16_PARAMETERS_MSTOLERANCE_type	dalton
RESULTS_SEARCH_16_PARAMETERS_MSTOLERANCE_value	0.05
RESULTS_SEARCH_16_PARAMETERS_MSMSTOLERANCE_type	dalton
RESULTS_SEARCH_16_PARAMETERS_MSMSTOLERANCE_value	0.1
RESULTS_SEARCH_16_PARAMETERS_MS_STANDARD_DEVIATION_type	dalton
RESULTS_SEARCH_16_PARAMETERS_MS_STANDARD_DEVIATION_value	0.0011
RESULTS_SEARCH_16_PARAMETERS_MSMS_STANDARD_DEVIATION_type	dalton
RESULTS_SEARCH_16_PARAMETERS_MSMS_STANDARD_DEVIATION_value	0.01
RESULTS_SEARCH_16_PARAMETERS_FASTA_filename	C:\AB SCIEX\ProteinPilot Data\SearchDatabases\uniprot-zebrafish_with_Clover.fasta
RESULTS_SEARCH_16_PARAMETERS_AUTO_CALIBRATION_ms	TRUE
RESULTS_SEARCH_16_PARAMETERS_AUTO_CALIBRATION_msexport	FALSE
RESULTS_SEARCH_16_PARAMETERS_AUTO_CALIBRATION_msms	TRUE
RESULTS_SEARCH_16_PARAMETERS_AUTO_CALIBRATION_msmstolsdratio	2.75
RESULTS_SEARCH_16_PARAMETERS_AUTO_CALIBRATION_mstolsdratio	7
RESULTS_SEARCH_16_PARAMETERS_AUTO_CALIBRATION_squareroot	TRUE
RESULTS_SEARCH_16_PARAMETERS_AUTO_CALIBRATION_type	dalton
RESULTS_SEARCH_16_PARAMETERS_AUTO_CALIBRATION_MCP_d_s_s_f	0.0666667
RESULTS_SEARCH_16_PARAMETERS_AUTO_CALIBRATION_MCP_d_s_w_f	3
RESULTS_SEARCH_16_PARAMETERS_AUTO_CALIBRATION_MCP_m_f_r_mbc	200
RESULTS_SEARCH_16_PARAMETERS_AUTO_CALIBRATION_MCP_m_m_c	10
RESULTS_SEARCH_16_PARAMETERS_AUTO_CALIBRATION_MCP_m_m_f_s	0.25
RESULTS_SEARCH_16_PARAMETERS_AUTO_CALIBRATION_MCP_m_m_p_f	0.33
RESULTS_SEARCH_16_PARAMETERS_AUTO_CALIBRATION_MCP_m_m_p_rms_f	1
RESULTS_SEARCH_16_PARAMETERS_AUTO_CALIBRATION_MCP_m_p_t_f	1
RESULTS_SEARCH_16_PARAMETERS_AUTO_CALIBRATION_MCP_m_r_h_n_b	15
RESULTS_SEARCH_16_PARAMETERS_AUTO_CALIBRATION_MCP_m_z_n_s	99
RESULTS_SEARCH_16_PARAMETERS_AUTO_CALIBRATION_MCP_m_z_s_mn_f_r	0.0666667
RESULTS_SEARCH_16_PARAMETERS_AUTO_CALIBRATION_MCP_m_z_s_mx_f_r	0.1
RESULTS_SEARCH_16_PARAMETERS_MS_AUTO_CALIBRATION_OUT_avres	-3.41853e-10
RESULTS_SEARCH_16_PARAMETERS_MS_AUTO_CALIBRATION_OUT_c0	0.000121881
RESULTS_SEARCH_16_PARAMETERS_MS_AUTO_CALIBRATION_OUT_c1minus1	-9.25326e-06
RESULTS_SEARCH_16_PARAMETERS_MS_AUTO_CALIBRATION_OUT_c2	0
RESULTS_SEARCH_16_PARAMETERS_MS_AUTO_CALIBRATION_OUT_file	5
RESULTS_SEARCH_16_PARAMETERS_MS_AUTO_CALIBRATION_OUT_partnumber	8
RESULTS_SEARCH_16_PARAMETERS_MS_AUTO_CALIBRATION_OUT_polyorder	1
RESULTS_SEARCH_16_PARAMETERS_MS_AUTO_CALIBRATION_OUT_sample	1
RESULTS_SEARCH_16_PARAMETERS_MS_AUTO_CALIBRATION_OUT_squareroot	TRUE
RESULTS_SEARCH_16_PARAMETERS_MSMS_AUTO_CALIBRATION_OUT_avres	-3.72046e-08
RESULTS_SEARCH_16_PARAMETERS_MSMS_AUTO_CALIBRATION_OUT_c0	-6.00454e-06
RESULTS_SEARCH_16_PARAMETERS_MSMS_AUTO_CALIBRATION_OUT_c1minus1	-2.22616e-06
RESULTS_SEARCH_16_PARAMETERS_MSMS_AUTO_CALIBRATION_OUT_c2	0
RESULTS_SEARCH_16_PARAMETERS_MSMS_AUTO_CALIBRATION_OUT_file	5
RESULTS_SEARCH_16_PARAMETERS_MSMS_AUTO_CALIBRATION_OUT_partnumber	8
RESULTS_SEARCH_16_PARAMETERS_MSMS_AUTO_CALIBRATION_OUT_polyorder	1
RESULTS_SEARCH_16_PARAMETERS_MSMS_AUTO_CALIBRATION_OUT_sample	1
RESULTS_SEARCH_16_PARAMETERS_MSMS_AUTO_CALIBRATION_OUT_squareroot	TRUE
RESULTS_SEARCH_16_PARAMETERS_MAX_PRECURSORS_FRAGLET	5
RESULTS_SEARCH_16_PARAMETERS_MAX_PRECURSORS_TAGLET	1
RESULTS_SEARCH_16_PARAMETERS_PRECURSORS_DR_FRAGLET	1900-01-10
RESULTS_SEARCH_16_PARAMETERS_PRECURSORS_DR_TAGLET	1900-01-03
RESULTS_SEARCH_16_PARAMETERS_DEFAULT_CHARGE_STATE_1_charge	2
RESULTS_SEARCH_16_PARAMETERS_DEFAULT_CHARGE_STATE_1_probability	1
RESULTS_SEARCH_16_PARAMETERS_DEFAULT_CHARGE_STATE_2_charge	3
RESULTS_SEARCH_16_PARAMETERS_DEFAULT_CHARGE_STATE_2_probability	1
RESULTS_SEARCH_16_PARAMETERS_DEFAULT_CHARGE_STATE_3_charge	4
RESULTS_SEARCH_16_PARAMETERS_DEFAULT_CHARGE_STATE_3_probability	1
RESULTS_SEARCH_16_PARAMETERS_VERSION	5.0.1.0, 4895
RESULTS_SEARCH_16_PARAMETERS_PARAGON_VERSION	5.0.1.0, 4874
RESULTS_SEARCH_16_PARAMETERS_APPLICATION	ProteinPilot(tm) Software
RESULTS_SEARCH_16_PARAMETERS_PROGROUP_alternativedispositionmaximumfoldprobabilitydrop	100
RESULTS_SEARCH_16_PARAMETERS_PROGROUP_alternativedispositionmaximumfoldscoredrop	2
RESULTS_SEARCH_16_PARAMETERS_PROGROUP_autodiscordantpeptidethreshold	0.3
RESULTS_SEARCH_16_PARAMETERS_PROGROUP_bayesconfidencecalclulation	TRUE
RESULTS_SEARCH_16_PARAMETERS_PROGROUP_calibrateconfidence	TRUE
RESULTS_SEARCH_16_PARAMETERS_PROGROUP_compresspeptides	FALSE
RESULTS_SEARCH_16_PARAMETERS_PROGROUP_confidencepercentthresholdforexcludingothersfromquant	15
RESULTS_SEARCH_16_PARAMETERS_PROGROUP_confidencepercentthresholdforincludingselfinquant	15
RESULTS_SEARCH_16_PARAMETERS_PROGROUP_donotstoremspeaklists	FALSE
RESULTS_SEARCH_16_PARAMETERS_PROGROUP_fasta	C:\AB SCIEX\ProteinPilot Data\SearchDatabases\uniprot-zebrafish_with_Clover.fasta
RESULTS_SEARCH_16_PARAMETERS_PROGROUP_featuregroupminpepconf	0.66
RESULTS_SEARCH_16_PARAMETERS_PROGROUP_featuregroupminups	0.47
RESULTS_SEARCH_16_PARAMETERS_PROGROUP_focusingintersection	4
RESULTS_SEARCH_16_PARAMETERS_PROGROUP_focusingminimummatchconfidence	0.1
RESULTS_SEARCH_16_PARAMETERS_PROGROUP_focusingminunusedprotscore	0.1
RESULTS_SEARCH_16_PARAMETERS_PROGROUP_focusingsubsetcutoff	6
RESULTS_SEARCH_16_PARAMETERS_PROGROUP_intersection	1.3
RESULTS_SEARCH_16_PARAMETERS_PROGROUP_minimummatchconfidencecutoff	0.001
RESULTS_SEARCH_16_PARAMETERS_PROGROUP_minunusedprotscore	0.0458
RESULTS_SEARCH_16_PARAMETERS_PROGROUP_subsetcutoff	2
RESULTS_SEARCH_16_PARAMETERS_PROGROUP_unusedprotscorethresholdforexcludingothersfromquant	1.3
RESULTS_SEARCH_16_PARAMETERS_PEAKLIST_count	2184
RESULTS_SEARCH_16_PARAMETERS_PEAKLIST_filenumber	5
RESULTS_SEARCH_16_PARAMETERS_PEAKLIST_original_count	2184
RESULTS_SEARCH_16_PARAMETERS_PEAKLIST_originalfilename	C:\AB SCIEX\ProteinPilot Data\Results\Albert\ZX 20200624 6600\ZX 20200624 C4A Control 5.wiff
RESULTS_SEARCH_16_PARAMETERS_PEAKLIST_partnumber	8
RESULTS_SEARCH_16_PARAMETERS_QUANT_TYPE_background_correction	FALSE
RESULTS_SEARCH_16_PARAMETERS_QUANT_TYPE_bias_correction	TRUE
RESULTS_SEARCH_16_PARAMETERS_QUANT_TYPE_keep_extreme_peptides_over_fraction	0
RESULTS_SEARCH_16_PARAMETERS_QUANT_TYPE_low_confidence_check	TRUE
RESULTS_SEARCH_16_PARAMETERS_QUANT_TYPE_low_intensity_check	TRUE
RESULTS_SEARCH_16_PARAMETERS_QUANT_TYPE_median_statistic	TRUE
RESULTS_SEARCH_16_PARAMETERS_QUANT_TYPE_mod_check	TRUE
RESULTS_SEARCH_16_PARAMETERS_QUANT_TYPE_quant_threshold	-1
RESULTS_SEARCH_16_PARAMETERS_QUANT_TYPE_quant_threshold_sn	9
RESULTS_SEARCH_16_PARAMETERS_QUANT_TYPE_separate_searches	FALSE
RESULTS_SEARCH_16_PARAMETERS_QUANT_TYPE_shared_msms_check	TRUE
RESULTS_SEARCH_16_PARAMETERS_PARAGON_METHOD_SETTINGS_UI_SAMPLE_TYPE	Identification
RESULTS_SEARCH_16_PARAMETERS_PARAGON_METHOD_SETTINGS_UI_CYS_ALKYLATION	Iodoacetamide w other Cys mods possible
RESULTS_SEARCH_16_PARAMETERS_PARAGON_METHOD_SETTINGS_UI_DIGESTION	Trypsin + Lys C
RESULTS_SEARCH_16_PARAMETERS_PARAGON_METHOD_SETTINGS_UI_SPECIAL_FACTOR	Gel-based ID
RESULTS_SEARCH_16_PARAMETERS_PARAGON_METHOD_SETTINGS_UI_INSTRUMENT	TripleTOF 6600
RESULTS_SEARCH_16_PARAMETERS_PARAGON_METHOD_SETTINGS_UI_SEARCH_EFFORT	Thorough
RESULTS_SEARCH_16_PARAMETERS_PARAGON_METHOD_SETTINGS_UI_USER_NAME	IMB-MASS02\massuser
RESULTS_SEARCH_16_PARAMETERS_PARAGON_METHOD_SETTINGS_UI_MACHINE_NAME	IMB-MASS02
RESULTS_SEARCH_16_PARAMETERS_PARAGON_METHOD_SETTINGS_UI_SEARCH_ID	6.37467e+17
RESULTS_SEARCH_16_PARAMETERS_PARAGON_METHOD_SETTINGS_UI_START_TIME	2021-01-19 16:09:14
RESULTS_SEARCH_16_PARAMETERS_PARAGON_METHOD_SETTINGS_UI_MIN_UNUSED_PROTSCORE	0.0458
RESULTS_SEARCH_16_PARAMETERS_PARAGON_METHOD_SETTINGS_UI_PSPEP	TRUE
RESULTS_SEARCH_17_time_cpu	300379
RESULTS_SEARCH_17_time_duration	303837
RESULTS_SEARCH_17_version	5.0.1.4874
RESULTS_SEARCH_17_xml:id	SEARCH:1:637466693437157084_8
RESULTS_SEARCH_17_PARAMETERS_chemical_data_edited	FALSE
RESULTS_SEARCH_17_PARAMETERS_do_multiprecursor_search	TRUE
RESULTS_SEARCH_17_PARAMETERS_do_reverse_search	TRUE
RESULTS_SEARCH_17_PARAMETERS_max_quant_labels	35
RESULTS_SEARCH_17_PARAMETERS_maxresults	15
RESULTS_SEARCH_17_PARAMETERS_separate_searches	FALSE
RESULTS_SEARCH_17_PARAMETERS_MSTOLERANCE_type	dalton
RESULTS_SEARCH_17_PARAMETERS_MSTOLERANCE_value	0.05
RESULTS_SEARCH_17_PARAMETERS_MSMSTOLERANCE_type	dalton
RESULTS_SEARCH_17_PARAMETERS_MSMSTOLERANCE_value	0.1
RESULTS_SEARCH_17_PARAMETERS_MS_STANDARD_DEVIATION_type	dalton
RESULTS_SEARCH_17_PARAMETERS_MS_STANDARD_DEVIATION_value	0.0011
RESULTS_SEARCH_17_PARAMETERS_MSMS_STANDARD_DEVIATION_type	dalton
RESULTS_SEARCH_17_PARAMETERS_MSMS_STANDARD_DEVIATION_value	0.01
RESULTS_SEARCH_17_PARAMETERS_FASTA_filename	C:\AB SCIEX\ProteinPilot Data\SearchDatabases\uniprot-zebrafish_with_Clover.fasta
RESULTS_SEARCH_17_PARAMETERS_AUTO_CALIBRATION_ms	TRUE
RESULTS_SEARCH_17_PARAMETERS_AUTO_CALIBRATION_msexport	FALSE
RESULTS_SEARCH_17_PARAMETERS_AUTO_CALIBRATION_msms	TRUE
RESULTS_SEARCH_17_PARAMETERS_AUTO_CALIBRATION_msmstolsdratio	2.75
RESULTS_SEARCH_17_PARAMETERS_AUTO_CALIBRATION_mstolsdratio	7
RESULTS_SEARCH_17_PARAMETERS_AUTO_CALIBRATION_squareroot	TRUE
RESULTS_SEARCH_17_PARAMETERS_AUTO_CALIBRATION_type	dalton
RESULTS_SEARCH_17_PARAMETERS_AUTO_CALIBRATION_MCP_d_s_s_f	0.0666667
RESULTS_SEARCH_17_PARAMETERS_AUTO_CALIBRATION_MCP_d_s_w_f	3
RESULTS_SEARCH_17_PARAMETERS_AUTO_CALIBRATION_MCP_m_f_r_mbc	200
RESULTS_SEARCH_17_PARAMETERS_AUTO_CALIBRATION_MCP_m_m_c	10
RESULTS_SEARCH_17_PARAMETERS_AUTO_CALIBRATION_MCP_m_m_f_s	0.25
RESULTS_SEARCH_17_PARAMETERS_AUTO_CALIBRATION_MCP_m_m_p_f	0.33
RESULTS_SEARCH_17_PARAMETERS_AUTO_CALIBRATION_MCP_m_m_p_rms_f	1
RESULTS_SEARCH_17_PARAMETERS_AUTO_CALIBRATION_MCP_m_p_t_f	1
RESULTS_SEARCH_17_PARAMETERS_AUTO_CALIBRATION_MCP_m_r_h_n_b	15
RESULTS_SEARCH_17_PARAMETERS_AUTO_CALIBRATION_MCP_m_z_n_s	99
RESULTS_SEARCH_17_PARAMETERS_AUTO_CALIBRATION_MCP_m_z_s_mn_f_r	0.0666667
RESULTS_SEARCH_17_PARAMETERS_AUTO_CALIBRATION_MCP_m_z_s_mx_f_r	0.1
RESULTS_SEARCH_17_PARAMETERS_MAX_PRECURSORS_FRAGLET	5
RESULTS_SEARCH_17_PARAMETERS_MAX_PRECURSORS_TAGLET	1
RESULTS_SEARCH_17_PARAMETERS_PRECURSORS_DR_FRAGLET	10
RESULTS_SEARCH_17_PARAMETERS_PRECURSORS_DR_TAGLET	3
RESULTS_SEARCH_17_PARAMETERS_DEFAULT_CHARGE_STATE_1_charge	2
RESULTS_SEARCH_17_PARAMETERS_DEFAULT_CHARGE_STATE_1_probability	1
RESULTS_SEARCH_17_PARAMETERS_DEFAULT_CHARGE_STATE_2_charge	3
RESULTS_SEARCH_17_PARAMETERS_DEFAULT_CHARGE_STATE_2_probability	1900-01-01
RESULTS_SEARCH_17_PARAMETERS_DEFAULT_CHARGE_STATE_3_charge	4
RESULTS_SEARCH_17_PARAMETERS_DEFAULT_CHARGE_STATE_3_probability	1
RESULTS_SEARCH_17_PARAMETERS_VERSION	5.0.1.0, 4895
RESULTS_SEARCH_17_PARAMETERS_PARAGON_VERSION	5.0.1.0, 4874
RESULTS_SEARCH_17_PARAMETERS_APPLICATION	ProteinPilot(tm) Software
RESULTS_SEARCH_17_PARAMETERS_PROGROUP_alternativedispositionmaximumfoldprobabilitydrop	100
RESULTS_SEARCH_17_PARAMETERS_PROGROUP_alternativedispositionmaximumfoldscoredrop	2
RESULTS_SEARCH_17_PARAMETERS_PROGROUP_autodiscordantpeptidethreshold	0.3
RESULTS_SEARCH_17_PARAMETERS_PROGROUP_bayesconfidencecalclulation	TRUE
RESULTS_SEARCH_17_PARAMETERS_PROGROUP_calibrateconfidence	TRUE
RESULTS_SEARCH_17_PARAMETERS_PROGROUP_compresspeptides	FALSE
RESULTS_SEARCH_17_PARAMETERS_PROGROUP_confidencepercentthresholdforexcludingothersfromquant	15
RESULTS_SEARCH_17_PARAMETERS_PROGROUP_confidencepercentthresholdforincludingselfinquant	15
RESULTS_SEARCH_17_PARAMETERS_PROGROUP_donotstoremspeaklists	FALSE
RESULTS_SEARCH_17_PARAMETERS_PROGROUP_fasta	C:\AB SCIEX\ProteinPilot Data\SearchDatabases\uniprot-zebrafish_with_Clover.fasta
RESULTS_SEARCH_17_PARAMETERS_PROGROUP_featuregroupminpepconf	0.66
RESULTS_SEARCH_17_PARAMETERS_PROGROUP_featuregroupminups	0.47
RESULTS_SEARCH_17_PARAMETERS_PROGROUP_focusingintersection	4
RESULTS_SEARCH_17_PARAMETERS_PROGROUP_focusingminimummatchconfidence	0.1
RESULTS_SEARCH_17_PARAMETERS_PROGROUP_focusingminunusedprotscore	0.1
RESULTS_SEARCH_17_PARAMETERS_PROGROUP_focusingsubsetcutoff	6
RESULTS_SEARCH_17_PARAMETERS_PROGROUP_intersection	1.3
RESULTS_SEARCH_17_PARAMETERS_PROGROUP_minimummatchconfidencecutoff	0.001
RESULTS_SEARCH_17_PARAMETERS_PROGROUP_minunusedprotscore	0.0458
RESULTS_SEARCH_17_PARAMETERS_PROGROUP_subsetcutoff	2
RESULTS_SEARCH_17_PARAMETERS_PROGROUP_unusedprotscorethresholdforexcludingothersfromquant	1.3
[truncated: 8,744 more rows]

## Sheet: Metadata Calculations
	Subsearch	Search string	present		File index down	Part number	Spectra - 'original'	Spectra 'count' - non-empty?	max original Spectra for part	Max non-empty spectra for part	File Index for first only
	1	RESULTS_SEARCH_1_PARAMETERS_PEAKLIST_rawdatafilename		C:\AB SCIEX\ProteinPilot Data\Results\Albert\ZX 20200624 6600\ZX 20200624 C4A Control 1.wiff	1	1	3361	3361	3361	3361	1
	2	RESULTS_SEARCH_2_PARAMETERS_PEAKLIST_rawdatafilename		C:\AB SCIEX\ProteinPilot Data\Results\Albert\ZX 20200624 6600\ZX 20200624 C4A Control 1.wiff	1	1	3361	3361
	3	RESULTS_SEARCH_3_PARAMETERS_PEAKLIST_rawdatafilename		C:\AB SCIEX\ProteinPilot Data\Results\Albert\ZX 20200624 6600\ZX 20200624 C4A Control 2.wiff	2	2	3721	3721	3721	3721	2
1 if Rapid, 2 if Thor	4	RESULTS_SEARCH_4_PARAMETERS_PEAKLIST_rawdatafilename		C:\AB SCIEX\ProteinPilot Data\Results\Albert\ZX 20200624 6600\ZX 20200624 C4A Control 2.wiff	2	2	3721	3721
2	5	RESULTS_SEARCH_5_PARAMETERS_PEAKLIST_rawdatafilename		C:\AB SCIEX\ProteinPilot Data\Results\Albert\ZX 20200624 6600\ZX 20200624 C4A Control 3.wiff	3	3	3470	3470	3470	3470	3
	6	RESULTS_SEARCH_6_PARAMETERS_PEAKLIST_rawdatafilename		C:\AB SCIEX\ProteinPilot Data\Results\Albert\ZX 20200624 6600\ZX 20200624 C4A Control 3.wiff	3	3	3470	3470
# Segments	7	RESULTS_SEARCH_7_PARAMETERS_PEAKLIST_rawdatafilename		C:\AB SCIEX\ProteinPilot Data\Results\Albert\ZX 20200624 6600\ZX 20200624 C4A Control 3.wiff	3	4	3468	3468	3468	3468
100	8	RESULTS_SEARCH_8_PARAMETERS_PEAKLIST_rawdatafilename		C:\AB SCIEX\ProteinPilot Data\Results\Albert\ZX 20200624 6600\ZX 20200624 C4A Control 3.wiff	3	4	3468	3468
(max is 1000 segments)	9	RESULTS_SEARCH_9_PARAMETERS_PEAKLIST_rawdatafilename		C:\AB SCIEX\ProteinPilot Data\Results\Albert\ZX 20200624 6600\ZX 20200624 C4A Control 3.wiff	3	5	3451	3451	3451	3451
	10	RESULTS_SEARCH_10_PARAMETERS_PEAKLIST_rawdatafilename		C:\AB SCIEX\ProteinPilot Data\Results\Albert\ZX 20200624 6600\ZX 20200624 C4A Control 3.wiff	3	5	3451	3451
	11	RESULTS_SEARCH_11_PARAMETERS_PEAKLIST_rawdatafilename		C:\AB SCIEX\ProteinPilot Data\Results\Albert\ZX 20200624 6600\ZX 20200624 C4A Control 4.wiff	4	6	2388	2388	2388	2388	4
	12	RESULTS_SEARCH_12_PARAMETERS_PEAKLIST_rawdatafilename		C:\AB SCIEX\ProteinPilot Data\Results\Albert\ZX 20200624 6600\ZX 20200624 C4A Control 4.wiff	4	6	2388	2388
	13	RESULTS_SEARCH_13_PARAMETERS_PEAKLIST_rawdatafilename		C:\AB SCIEX\ProteinPilot Data\Results\Albert\ZX 20200624 6600\ZX 20200624 C4A Control 5.wiff	5	7	2185	2185	2185	2185	5
	14	RESULTS_SEARCH_14_PARAMETERS_PEAKLIST_rawdatafilename		C:\AB SCIEX\ProteinPilot Data\Results\Albert\ZX 20200624 6600\ZX 20200624 C4A Control 5.wiff	5	7	2185	2185
	15	RESULTS_SEARCH_15_PARAMETERS_PEAKLIST_rawdatafilename		C:\AB SCIEX\ProteinPilot Data\Results\Albert\ZX 20200624 6600\ZX 20200624 C4A Control 5.wiff	5	8	2184	2184	2184	2184
	16	RESULTS_SEARCH_16_PARAMETERS_PEAKLIST_rawdatafilename		C:\AB SCIEX\ProteinPilot Data\Results\Albert\ZX 20200624 6600\ZX 20200624 C4A Control 5.wiff	5	8	2184	2184
	17	RESULTS_SEARCH_17_PARAMETERS_PEAKLIST_rawdatafilename		C:\AB SCIEX\ProteinPilot Data\Results\Albert\ZX 20200624 6600\ZX 20200624 C4A Control 6.wiff	6	9	2381	2381	2381	2381	6
	18	RESULTS_SEARCH_18_PARAMETERS_PEAKLIST_rawdatafilename		C:\AB SCIEX\ProteinPilot Data\Results\Albert\ZX 20200624 6600\ZX 20200624 C4A Control 6.wiff	6	9	2381	2381
	19	RESULTS_SEARCH_19_PARAMETERS_PEAKLIST_rawdatafilename		C:\AB SCIEX\ProteinPilot Data\Results\Albert\ZX 20200624 6600\ZX 20200624 C4A Control 7.wiff	7	10	2453	2453	2453	2453	7
	20	RESULTS_SEARCH_20_PARAMETERS_PEAKLIST_rawdatafilename		C:\AB SCIEX\ProteinPilot Data\Results\Albert\ZX 20200624 6600\ZX 20200624 C4A Control 7.wiff	7	10	2453	2453
	21	RESULTS_SEARCH_21_PARAMETERS_PEAKLIST_rawdatafilename		C:\AB SCIEX\ProteinPilot Data\Results\Albert\ZX 20200624 6600\ZX 20200624 C4A Control 8.wiff	8	11	2516	2516	2516	2516	8
	22	RESULTS_SEARCH_22_PARAMETERS_PEAKLIST_rawdatafilename		C:\AB SCIEX\ProteinPilot Data\Results\Albert\ZX 20200624 6600\ZX 20200624 C4A Control 8.wiff	8	11	2516	2516
	23	RESULTS_SEARCH_23_PARAMETERS_PEAKLIST_rawdatafilename		C:\AB SCIEX\ProteinPilot Data\Results\Albert\ZX 20200624 6600\ZX 20200624 C4A Control 9.wiff	9	12	2862	2862	2862	2862	9
	24	RESULTS_SEARCH_24_PARAMETERS_PEAKLIST_rawdatafilename		C:\AB SCIEX\ProteinPilot Data\Results\Albert\ZX 20200624 6600\ZX 20200624 C4A Control 9.wiff	9	12	2862	2862
	25	RESULTS_SEARCH_25_PARAMETERS_PEAKLIST_rawdatafilename		C:\AB SCIEX\ProteinPilot Data\Results\Albert\ZX 20200624 6600\ZX 20200624 C4A Control 10.wiff	10	13	2741	2741	2741	2741	10
	26	RESULTS_SEARCH_26_PARAMETERS_PEAKLIST_rawdatafilename		C:\AB SCIEX\ProteinPilot Data\Results\Albert\ZX 20200624 6600\ZX 20200624 C4A Control 10.wiff	10	13	2741	2741
	27	RESULTS_SEARCH_27_PARAMETERS_PEAKLIST_rawdatafilename		C:\AB SCIEX\ProteinPilot Data\Results\Albert\ZX 20200624 6600\ZX 20200624 C4A Control 11.wiff	11	14	3639	3639	3639	3639	11
	28	RESULTS_SEARCH_28_PARAMETERS_PEAKLIST_rawdatafilename		C:\AB SCIEX\ProteinPilot Data\Results\Albert\ZX 20200624 6600\ZX 20200624 C4A Control 11.wiff	11	14	3639	3639
	29	RESULTS_SEARCH_29_PARAMETERS_PEAKLIST_rawdatafilename		C:\AB SCIEX\ProteinPilot Data\Results\Albert\ZX 20200624 6600\ZX 20200624 C4A Control 11.wiff	11	15	3625	3625	3625	3625
	30	RESULTS_SEARCH_30_PARAMETERS_PEAKLIST_rawdatafilename		C:\AB SCIEX\ProteinPilot Data\Results\Albert\ZX 20200624 6600\ZX 20200624 C4A Control 11.wiff	11	15	3625	3625
	31	RESULTS_SEARCH_31_PARAMETERS_PEAKLIST_rawdatafilename		C:\AB SCIEX\ProteinPilot Data\Results\Albert\ZX 20200819 6600\ZX 20200819 6600 C4A Control 1.wiff	12	16	2299	2298	2299	2298	12
	32	RESULTS_SEARCH_32_PARAMETERS_PEAKLIST_rawdatafilename		C:\AB SCIEX\ProteinPilot Data\Results\Albert\ZX 20200819 6600\ZX 20200819 6600 C4A Control 1.wiff	12	16	2299	2298
	33	RESULTS_SEARCH_33_PARAMETERS_PEAKLIST_rawdatafilename		C:\AB SCIEX\ProteinPilot Data\Results\Albert\ZX 20200819 6600\ZX 20200819 6600 C4A Control 1.wiff	12	17	2289	2289	2289	2289
	34	RESULTS_SEARCH_34_PARAMETERS_PEAKLIST_rawdatafilename		C:\AB SCIEX\ProteinPilot Data\Results\Albert\ZX 20200819 6600\ZX 20200819 6600 C4A Control 1.wiff	12	17	2289	2289
	35	RESULTS_SEARCH_35_PARAMETERS_PEAKLIST_rawdatafilename		C:\AB SCIEX\ProteinPilot Data\Results\Albert\ZX 20200819 6600\ZX 20200819 6600 C4A Control 2.wiff	13	18	3250	3248	3250	3248	13
	36	RESULTS_SEARCH_36_PARAMETERS_PEAKLIST_rawdatafilename		C:\AB SCIEX\ProteinPilot Data\Results\Albert\ZX 20200819 6600\ZX 20200819 6600 C4A Control 2.wiff	13	18	3250	3248
	37	RESULTS_SEARCH_37_PARAMETERS_PEAKLIST_rawdatafilename		C:\AB SCIEX\ProteinPilot Data\Results\Albert\ZX 20200819 6600\ZX 20200819 6600 C4A Control 2.wiff	13	19	3213	3213	3213	3213
	38	RESULTS_SEARCH_38_PARAMETERS_PEAKLIST_rawdatafilename		C:\AB SCIEX\ProteinPilot Data\Results\Albert\ZX 20200819 6600\ZX 20200819 6600 C4A Control 2.wiff	13	19	3213	3213
	39	RESULTS_SEARCH_39_PARAMETERS_PEAKLIST_rawdatafilename		C:\AB SCIEX\ProteinPilot Data\Results\Albert\ZX 20200819 6600\ZX 20200819 6600 C4A Control 3.wiff	14	20	3234	3233	3234	3233	14
	40	RESULTS_SEARCH_40_PARAMETERS_PEAKLIST_rawdatafilename		C:\AB SCIEX\ProteinPilot Data\Results\Albert\ZX 20200819 6600\ZX 20200819 6600 C4A Control 3.wiff	14	20	3234	3233
	41	RESULTS_SEARCH_41_PARAMETERS_PEAKLIST_rawdatafilename		C:\AB SCIEX\ProteinPilot Data\Results\Albert\ZX 20200819 6600\ZX 20200819 6600 C4A Control 3.wiff	14	21	3236	3236	3236	3236
	42	RESULTS_SEARCH_42_PARAMETERS_PEAKLIST_rawdatafilename		C:\AB SCIEX\ProteinPilot Data\Results\Albert\ZX 20200819 6600\ZX 20200819 6600 C4A Control 3.wiff	14	21	3236	3236
	43	RESULTS_SEARCH_43_PARAMETERS_PEAKLIST_rawdatafilename		C:\AB SCIEX\ProteinPilot Data\Results\Albert\ZX 20200819 6600\ZX 20200819 6600 C4A Control 3.wiff	14	22	3230	3230	3230	3230
	44	RESULTS_SEARCH_44_PARAMETERS_PEAKLIST_rawdatafilename		C:\AB SCIEX\ProteinPilot Data\Results\Albert\ZX 20200819 6600\ZX 20200819 6600 C4A Control 3.wiff	14	22	3230	3230
	45	RESULTS_SEARCH_45_PARAMETERS_PEAKLIST_rawdatafilename		C:\AB SCIEX\ProteinPilot Data\Results\Albert\ZX 20200819 6600\ZX 20200819 6600 C4A Control 4.wiff	15	23	3654	3653	3654	3653	15
	46	RESULTS_SEARCH_46_PARAMETERS_PEAKLIST_rawdatafilename		C:\AB SCIEX\ProteinPilot Data\Results\Albert\ZX 20200819 6600\ZX 20200819 6600 C4A Control 4.wiff	15	23	3654	3653
	47	RESULTS_SEARCH_47_PARAMETERS_PEAKLIST_rawdatafilename		C:\AB SCIEX\ProteinPilot Data\Results\Albert\ZX 20200819 6600\ZX 20200819 6600 C4A Control 4.wiff	15	24	3620	3620	3620	3620
	48	RESULTS_SEARCH_48_PARAMETERS_PEAKLIST_rawdatafilename		C:\AB SCIEX\ProteinPilot Data\Results\Albert\ZX 20200819 6600\ZX 20200819 6600 C4A Control 4.wiff	15	24	3620	3620
	49	RESULTS_SEARCH_49_PARAMETERS_PEAKLIST_rawdatafilename		C:\AB SCIEX\ProteinPilot Data\Results\Albert\ZX 20200819 6600\ZX 20200819 6600 C4A Control 5.wiff	16	25	2766	2766	2766	2766	16
	50	RESULTS_SEARCH_50_PARAMETERS_PEAKLIST_rawdatafilename		C:\AB SCIEX\ProteinPilot Data\Results\Albert\ZX 20200819 6600\ZX 20200819 6600 C4A Control 5.wiff	16	25	2766	2766
	51	RESULTS_SEARCH_51_PARAMETERS_PEAKLIST_rawdatafilename		C:\AB SCIEX\ProteinPilot Data\Results\Albert\ZX 20200819 6600\ZX 20200819 6600 C4A Control 5.wiff	16	26	2766	2766	2766	2766
	52	RESULTS_SEARCH_52_PARAMETERS_PEAKLIST_rawdatafilename		C:\AB SCIEX\ProteinPilot Data\Results\Albert\ZX 20200819 6600\ZX 20200819 6600 C4A Control 5.wiff	16	26	2766	2766
	53	RESULTS_SEARCH_53_PARAMETERS_PEAKLIST_rawdatafilename		C:\AB SCIEX\ProteinPilot Data\Results\Albert\ZX 20200819 6600\ZX 20200819 6600 C4A Control 5.wiff	16	27	2765	2764	2765	2764
	54	RESULTS_SEARCH_54_PARAMETERS_PEAKLIST_rawdatafilename		C:\AB SCIEX\ProteinPilot Data\Results\Albert\ZX 20200819 6600\ZX 20200819 6600 C4A Control 5.wiff	16	27	2765	2764
	55	RESULTS_SEARCH_55_PARAMETERS_PEAKLIST_rawdatafilename		C:\AB SCIEX\ProteinPilot Data\Results\Albert\ZX 20200819 6600\ZX 20200819 6600 C4A Control 6.wiff	17	28	2697	2697	2697	2697	17
	56	RESULTS_SEARCH_56_PARAMETERS_PEAKLIST_rawdatafilename		C:\AB SCIEX\ProteinPilot Data\Results\Albert\ZX 20200819 6600\ZX 20200819 6600 C4A Control 6.wiff	17	28	2697	2697
	57	RESULTS_SEARCH_57_PARAMETERS_PEAKLIST_rawdatafilename		C:\AB SCIEX\ProteinPilot Data\Results\Albert\ZX 20200819 6600\ZX 20200819 6600 C4A Control 6.wiff	17	29	2705	2704	2705	2704
	58	RESULTS_SEARCH_58_PARAMETERS_PEAKLIST_rawdatafilename		C:\AB SCIEX\ProteinPilot Data\Results\Albert\ZX 20200819 6600\ZX 20200819 6600 C4A Control 6.wiff	17	29	2705	2704
	59	RESULTS_SEARCH_59_PARAMETERS_PEAKLIST_rawdatafilename		C:\AB SCIEX\ProteinPilot Data\Results\Albert\ZX 20200819 6600\ZX 20200819 6600 C4A Control 6.wiff	17	30	2686	2686	2686	2686
	60	RESULTS_SEARCH_60_PARAMETERS_PEAKLIST_rawdatafilename		C:\AB SCIEX\ProteinPilot Data\Results\Albert\ZX 20200819 6600\ZX 20200819 6600 C4A Control 6.wiff	17	30	2686	2686
	61	RESULTS_SEARCH_61_PARAMETERS_PEAKLIST_rawdatafilename		C:\AB SCIEX\ProteinPilot Data\Results\Albert\ZX 20200819 6600\ZX 20200819 6600 C4A Control 7.wiff	18	31	3909	3908	3909	3908	18
	62	RESULTS_SEARCH_62_PARAMETERS_PEAKLIST_rawdatafilename		C:\AB SCIEX\ProteinPilot Data\Results\Albert\ZX 20200819 6600\ZX 20200819 6600 C4A Control 7.wiff	18	31	3909	3908
	63	RESULTS_SEARCH_63_PARAMETERS_PEAKLIST_rawdatafilename		C:\AB SCIEX\ProteinPilot Data\Results\Albert\ZX 20200819 6600\ZX 20200819 6600 C4A Control 7.wiff	18	32	3873	3873	3873	3873
	64	RESULTS_SEARCH_64_PARAMETERS_PEAKLIST_rawdatafilename		C:\AB SCIEX\ProteinPilot Data\Results\Albert\ZX 20200819 6600\ZX 20200819 6600 C4A Control 7.wiff	18	32	3873	3873
	65	RESULTS_SEARCH_65_PARAMETERS_PEAKLIST_rawdatafilename		C:\AB SCIEX\ProteinPilot Data\Results\Albert\ZX 20200819 6600\ZX 20200819 6600 C4A Control 8.wiff	19	33	3649	3647	3649	3647	19
	66	RESULTS_SEARCH_66_PARAMETERS_PEAKLIST_rawdatafilename		C:\AB SCIEX\ProteinPilot Data\Results\Albert\ZX 20200819 6600\ZX 20200819 6600 C4A Control 8.wiff	19	33	3649	3647
	67	RESULTS_SEARCH_67_PARAMETERS_PEAKLIST_rawdatafilename		C:\AB SCIEX\ProteinPilot Data\Results\Albert\ZX 20200819 6600\ZX 20200819 6600 C4A Control 8.wiff	19	34	3648	3648	3648	3648
	68	RESULTS_SEARCH_68_PARAMETERS_PEAKLIST_rawdatafilename		C:\AB SCIEX\ProteinPilot Data\Results\Albert\ZX 20200819 6600\ZX 20200819 6600 C4A Control 8.wiff	19	34	3648	3648
	69	RESULTS_SEARCH_69_PARAMETERS_PEAKLIST_rawdatafilename		C:\AB SCIEX\ProteinPilot Data\Results\Albert\ZX 20200819 6600\ZX 20200819 6600 C4A Control 9.wiff	20	35	3567	3564	3567	3564	20
	70	RESULTS_SEARCH_70_PARAMETERS_PEAKLIST_rawdatafilename		C:\AB SCIEX\ProteinPilot Data\Results\Albert\ZX 20200819 6600\ZX 20200819 6600 C4A Control 9.wiff	20	35	3567	3564
	71	RESULTS_SEARCH_71_PARAMETERS_PEAKLIST_rawdatafilename		C:\AB SCIEX\ProteinPilot Data\Results\Albert\ZX 20200819 6600\ZX 20200819 6600 C4A Control 9.wiff	20	36	3543	3543	3543	3543
	72	RESULTS_SEARCH_72_PARAMETERS_PEAKLIST_rawdatafilename		C:\AB SCIEX\ProteinPilot Data\Results\Albert\ZX 20200819 6600\ZX 20200819 6600 C4A Control 9.wiff	20	36	3543	3543
	73	RESULTS_SEARCH_73_PARAMETERS_PEAKLIST_rawdatafilename		C:\AB SCIEX\ProteinPilot Data\Results\Albert\ZX 20200819 6600\ZX 20200819 6600 C4A Control 10.wiff	21	37	3447	3447	3447	3447	21
	74	RESULTS_SEARCH_74_PARAMETERS_PEAKLIST_rawdatafilename		C:\AB SCIEX\ProteinPilot Data\Results\Albert\ZX 20200819 6600\ZX 20200819 6600 C4A Control 10.wiff	21	37	3447	3447
	75	RESULTS_SEARCH_75_PARAMETERS_PEAKLIST_rawdatafilename		C:\AB SCIEX\ProteinPilot Data\Results\Albert\ZX 20200819 6600\ZX 20200819 6600 C4A Control 10.wiff	21	38	3441	3441	3441	3441
	76	RESULTS_SEARCH_76_PARAMETERS_PEAKLIST_rawdatafilename		C:\AB SCIEX\ProteinPilot Data\Results\Albert\ZX 20200819 6600\ZX 20200819 6600 C4A Control 10.wiff	21	38	3441	3441
	77	RESULTS_SEARCH_77_PARAMETERS_PEAKLIST_rawdatafilename		C:\AB SCIEX\ProteinPilot Data\Results\Albert\ZX 20200819 6600\ZX 20200819 6600 C4A Control 10.wiff	21	39	3453	3453	3453	3453
	78	RESULTS_SEARCH_78_PARAMETERS_PEAKLIST_rawdatafilename		C:\AB SCIEX\ProteinPilot Data\Results\Albert\ZX 20200819 6600\ZX 20200819 6600 C4A Control 10.wiff	21	39	3453	3453
	79	RESULTS_SEARCH_79_PARAMETERS_PEAKLIST_rawdatafilename		C:\AB SCIEX\ProteinPilot Data\Results\Albert\ZX 20200819 6600\ZX 20200819 6600 C4A Control 10.wiff	21	40	3435	3435	3435	3435
	80	RESULTS_SEARCH_80_PARAMETERS_PEAKLIST_rawdatafilename		C:\AB SCIEX\ProteinPilot Data\Results\Albert\ZX 20200819 6600\ZX 20200819 6600 C4A Control 10.wiff	21	40	3435	3435
	81	RESULTS_SEARCH_81_PARAMETERS_PEAKLIST_rawdatafilename		C:\AB SCIEX\ProteinPilot Data\Results\Albert\ZX 20200819 6600\ZX 20200819 6600 C4A Control 11.wiff	22	41	3497	3497	3497	3497	22
	82	RESULTS_SEARCH_82_PARAMETERS_PEAKLIST_rawdatafilename		C:\AB SCIEX\ProteinPilot Data\Results\Albert\ZX 20200819 6600\ZX 20200819 6600 C4A Control 11.wiff	22	41	3497	3497
	83	RESULTS_SEARCH_83_PARAMETERS_PEAKLIST_rawdatafilename		C:\AB SCIEX\ProteinPilot Data\Results\Albert\ZX 20200819 6600\ZX 20200819 6600 C4A Control 12.wiff	23	42	3137	3137	3137	3137	23
	84	RESULTS_SEARCH_84_PARAMETERS_PEAKLIST_rawdatafilename		C:\AB SCIEX\ProteinPilot Data\Results\Albert\ZX 20200819 6600\ZX 20200819 6600 C4A Control 12.wiff	23	42	3137	3137
	85	RESULTS_SEARCH_85_PARAMETERS_PEAKLIST_rawdatafilename		C:\AB SCIEX\ProteinPilot Data\Results\Albert\ZX 20200819 6600\ZX 20200819 6600 C4A Control 12.wiff	23	43	3139	3139	3139	3139
	86	RESULTS_SEARCH_86_PARAMETERS_PEAKLIST_rawdatafilename		C:\AB SCIEX\ProteinPilot Data\Results\Albert\ZX 20200819 6600\ZX 20200819 6600 C4A Control 12.wiff	23	43	3139	3139
	87	RESULTS_SEARCH_87_PARAMETERS_PEAKLIST_rawdatafilename		C:\AB SCIEX\ProteinPilot Data\Results\Albert\ZX 20200819 6600\ZX 20200819 6600 C4A Control 12.wiff	23	44	3135	3135	3135	3135
	88	RESULTS_SEARCH_88_PARAMETERS_PEAKLIST_rawdatafilename		C:\AB SCIEX\ProteinPilot Data\Results\Albert\ZX 20200819 6600\ZX 20200819 6600 C4A Control 12.wiff	23	44	3135	3135
	89	RESULTS_SEARCH_89_PARAMETERS_PEAKLIST_rawdatafilename		C:\AB SCIEX\ProteinPilot Data\Results\Albert\ZX 20200819 6600\ZX 20200819 6600 C4A Control 13.wiff	24	45	3308	3307	3308	3307	24
	90	RESULTS_SEARCH_90_PARAMETERS_PEAKLIST_rawdatafilename		C:\AB SCIEX\ProteinPilot Data\Results\Albert\ZX 20200819 6600\ZX 20200819 6600 C4A Control 13.wiff	24	45	3308	3307
	91	RESULTS_SEARCH_91_PARAMETERS_PEAKLIST_rawdatafilename		C:\AB SCIEX\ProteinPilot Data\Results\Albert\ZX 20200819 6600\ZX 20200819 6600 C4A Control 13.wiff	24	46	3307	3307	3307	3307
	92	RESULTS_SEARCH_92_PARAMETERS_PEAKLIST_rawdatafilename		C:\AB SCIEX\ProteinPilot Data\Results\Albert\ZX 20200819 6600\ZX 20200819 6600 C4A Control 13.wiff	24	46	3307	3307
	93	RESULTS_SEARCH_93_PARAMETERS_PEAKLIST_rawdatafilename		C:\AB SCIEX\ProteinPilot Data\Results\Albert\ZX 20200819 6600\ZX 20200819 6600 C4A Control 14.wiff	25	47	3859	3859	3859	3859	25
	94	RESULTS_SEARCH_94_PARAMETERS_PEAKLIST_rawdatafilename		C:\AB SCIEX\ProteinPilot Data\Results\Albert\ZX 20200819 6600\ZX 20200819 6600 C4A Control 14.wiff	25	47	3859	3859
	95	RESULTS_SEARCH_95_PARAMETERS_PEAKLIST_rawdatafilename		C:\AB SCIEX\ProteinPilot Data\Results\Albert\ZX 20200819 6600\ZX 20200819 6600 C4A Control 14.wiff	25	48	3855	3855	3855	3855
	96	RESULTS_SEARCH_96_PARAMETERS_PEAKLIST_rawdatafilename		C:\AB SCIEX\ProteinPilot Data\Results\Albert\ZX 20200819 6600\ZX 20200819 6600 C4A Control 14.wiff	25	48	3855	3855
	97	RESULTS_SEARCH_97_PARAMETERS_PEAKLIST_rawdatafilename		C:\AB SCIEX\ProteinPilot Data\Results\Albert\ZX 20200819 6600\ZX 20200819 6600 C4A Control 14.wiff	25	49	3852	3852	3852	3852
	98	RESULTS_SEARCH_98_PARAMETERS_PEAKLIST_rawdatafilename		C:\AB SCIEX\ProteinPilot Data\Results\Albert\ZX 20200819 6600\ZX 20200819 6600 C4A Control 14.wiff	25	49	3852	3852
	99	RESULTS_SEARCH_99_PARAMETERS_PEAKLIST_rawdatafilename		C:\AB SCIEX\ProteinPilot Data\Results\Albert\ZX 20200819 6600\ZX 20200819 6600 C4A Control 15.wiff	26	50	3033	3033	3033	3033	26
	100	RESULTS_SEARCH_100_PARAMETERS_PEAKLIST_rawdatafilename		C:\AB SCIEX\ProteinPilot Data\Results\Albert\ZX 20200819 6600\ZX 20200819 6600 C4A Control 15.wiff	26	50	3033	3033

## Sheet: Curated Metadata
Group file metadata term	Metadata Description (of raw extracted item)	Use Partial Match	Term in Stream	Derived (Calculated)	Value	Validation check/comments	Conversion type, if done	Conversion factor		Metadata Category	Metadata Description of Final Metadata Item (converted manually, if applicable)	Value
	Group filename			1						Attributes - General	Group filename	Source_File_4_Cavin4a_control.group
RESULTS_SEARCH_1_PARAMETERS_PARAGON_METHOD_SETTINGS_UI_START_TIME	Start date		1		2021-01-19 16:09:14					Attributes - General	Start date	2021-01-19 16:09:14
RESULTS_SEARCH_STAT_search_begin_time_clock	Start time		1		01/19/2021 16:09:14					Attributes - General	Start time	01/19/2021 16:09:14
RESULTS_SEARCH_1_PARAMETERS_PARAGON_METHOD_SETTINGS_UI_USER_NAME	User name		1		IMB-MASS02\massuser					Attributes - General	User name	IMB-MASS02\massuser
RESULTS_SEARCH_1_xml:id	Internal search identifier number		1	1						Attributes - General	Internal search identifier number
PARAMETERS_PEAKLIST_original_count				1						Attributes - Input data	Number of spectra in search	158942
PARAMETERS_PEAKLIST_count				1						Attributes - Input data	Number of non-empty spectra in search	158928
PARAMETERS_PEAKLIST_filenumber	Number of input files	1	1	1	26					Attributes - Input data	Number of input files	26
RESULTS_SEARCH_1_PARAMETERS_PARAGON_METHOD_SETTINGS_UI_SAMPLE_TYPE	Sample Type		1		Identification					Parameters - User settings	Sample Type	Identification
RESULTS_SEARCH_1_PARAMETERS_PARAGON_METHOD_SETTINGS_UI_CYS_ALKYLATION	Cysteine Alkylation		1		Iodoacetamide w other Cys mods possible					Parameters - User settings	Cysteine Alkylation	Iodoacetamide w other Cys mods possible
RESULTS_SEARCH_1_PARAMETERS_PARAGON_METHOD_SETTINGS_UI_DIGESTION	Digestion		1		Trypsin + Lys C					Parameters - User settings	Digestion	Trypsin + Lys C
RESULTS_SEARCH_1_PARAMETERS_PARAGON_METHOD_SETTINGS_UI_SPECIAL_FACTOR	Special Factors		1		Gel-based ID					Parameters - User settings	Special Factors	Gel-based ID
RESULTS_SEARCH_1_PARAMETERS_PARAGON_METHOD_SETTINGS_UI_INSTRUMENT	Instrument		1		TripleTOF 6600					Parameters - User settings	Instrument	TripleTOF 6600
RESULTS_SEARCH_1_PARAMETERS_PARAGON_METHOD_SETTINGS_UI_SPECIES	Species									Parameters - User settings	Species
RESULTS_SEARCH_1_PARAMETERS_PARAGON_METHOD_SETTINGS_UI_SEARCH_EFFORT	Search Effort		1		Thorough					Parameters - User settings	Search Effort	Thorough
RESULTS_SEARCH_1_PARAMETERS_PARAGON_METHOD_SETTINGS_UI_ID_FOCUS	ID Focus									Parameters - User settings	ID Focus
RESULTS_SEARCH_1_PARAMETERS_PARAGON_METHOD_SETTINGS_UI_MIN_UNUSED_PROTSCORE	Minimum Unused ProtScore		1		0.0458					Parameters - User settings	Minimum Unused ProtScore	0.0458
RESULTS_SEARCH_1_PARAMETERS_PARAGON_METHOD_SETTINGS_UI_PSPEP	FDR Analysis		1		TRUE		Logical to English			Parameters - User settings	FDR Analysis	Yes
	Quantitation						Logical to English			Parameters - User settings	Quantitation
RESULTS_SEARCH_1_PARAMETERS_QUANT_TYPE_background_correction	Background Correction		1		FALSE		Logical to English			Parameters - User settings	Background Correction	No
RESULTS_SEARCH_1_PARAMETERS_QUANT_TYPE_bias_correction	Bias Correction		1		TRUE		Logical to English			Parameters - User settings	Bias Correction	Yes
	Channel to use as denominator in ratios									Parameters - User settings	Channel to use as denominator in ratios
RESULTS_SEARCH_1_PARAMETERS_chemical_data_edited	Modified Data Dictionary or Parameter Translation		1		FALSE		Logical to English			Parameters - User settings	Modified Data Dictionary or Parameter Translation	No
RESULTS_SEARCH_1_PARAMETERS_FASTA_filename	Database filename		1		C:\AB SCIEX\ProteinPilot Data\SearchDatabases\uniprot-zebrafish_with_Clover.fasta					Attributes - Search database	Database filename	C:\AB SCIEX\ProteinPilot Data\SearchDatabases\uniprot-zebrafish_with_Clover.fasta
				1						Attributes - Search database	Number of Proteins in Database	75212
RESULTS_SEARCH_STAT_num_proteins	Number of proteins searched		1		150424					Attributes - Search database	Number of proteins searched	150424
				1						Attributes - Search database	Number of Residues in Database	37854281
RESULTS_SEARCH_STAT_num_residues	Number of residues searched		1		75708562					Attributes - Search database	Number of residues searched	75708562
RESULTS_SEARCH_STAT_computer_memory	RAM (MB)		1		32767					Attributes - Hardware	RAM (MB)	32767
RESULTS_SEARCH_STAT_computer_name	Computer name		1		IMB-MASS02					Attributes - Hardware	Computer name	IMB-MASS02
RESULTS_SEARCH_STAT_number_cores	Number of cores in computer		1		8					Attributes - Hardware	Number of cores in computer	8
RESULTS_SEARCH_STAT_number_processors	Number of threads (double cores if hyperthreading on)		1		8					Attributes - Hardware	Number of threads (double cores if hyperthreading on)	8
RESULTS_SEARCH_STAT_number_licensed_tasks	Number of cores licensed to use		1		16					Attributes - Software environment	Number of cores licensed to use	16
RESULTS_SEARCH_STAT_os	Operating system		1		Windows Server 2008 R2 Standard (6.1.7600)					Attributes - Software environment	Operating system	Windows Server 2008 R2 Standard (6.1.7600)
RESULTS_SEARCH_1_PARAMETERS_VERSION	ProteinPilot Software Version		1		5.0.1.0, 4895					Attributes - Software environment	ProteinPilot Software Version	5.0.1.0, 4895
RESULTS_SEARCH_1_PARAMETERS_PARAGON_VERSION	Paragon Algorithm Version		1		5.0.1.0, 4874					Attributes - Software environment	Paragon Algorithm Version	5.0.1.0, 4874
RESULTS_SEARCH_1_PARAMETERS_APPLICATION	Application name		1		ProteinPilot(tm) Software					Attributes - Software environment	Application name	ProteinPilot(tm) Software
RESULTS_GROUPRESULTSUMMARY_1_confidence	Confidence of first row in summary statistics ID statistics		1		0.99		Fraction to %	100		Statistics - Protein Summary Table	Percent Confidence of first row in Summary Statistics ID Statistics	99
RESULTS_GROUPRESULTSUMMARY_1_distinctpeptides	Distinct peptides associated with 99% confidence proteins		1		1966					Statistics - Protein Summary Table	Distinct peptides associated with 99% confidence proteins	1966
RESULTS_GROUPRESULTSUMMARY_1_proteinsbeforegroupping	Proteins before grouping (99% confidence)		1		418					Statistics - Protein Summary Table	Proteins before grouping (99% confidence)	418
RESULTS_GROUPRESULTSUMMARY_1_proteinsidentified	Proteins detected (99% confidence)		1		74					Statistics - Protein Summary Table	Proteins detected (99% confidence)	74
RESULTS_GROUPRESULTSUMMARY_1_spectraidentified	Spectra associated with 99% confidence proteins		1		14807					Statistics - Protein Summary Table	Spectra associated with 99% confidence proteins	14807
RESULTS_GROUPRESULTSUMMARY_2_confidence	Confidence of second row in Summary Statistics ID statistics		1		0.95		Fraction to %	100		Statistics - Protein Summary Table	Percent Confidence of first row in Summary Statistics ID Statistics	95
RESULTS_GROUPRESULTSUMMARY_2_distinctpeptides	Distinct peptides associated with 95% confidence proteins		1		2013					Statistics - Protein Summary Table	Distinct peptides associated with 95% confidence proteins	2013
RESULTS_GROUPRESULTSUMMARY_2_proteinsbeforegroupping	Proteins before grouping (95% confidence)		1		548					Statistics - Protein Summary Table	Proteins before grouping (95% confidence)	548
RESULTS_GROUPRESULTSUMMARY_2_proteinsidentified	Proteins detected (95% confidence)		1		94					Statistics - Protein Summary Table	Proteins detected (95% confidence)	94
RESULTS_GROUPRESULTSUMMARY_2_spectraidentified	Spectra associated with 95% confidence proteins		1		14940					Statistics - Protein Summary Table	Spectra associated with 95% confidence proteins	14940
RESULTS_GROUPRESULTSUMMARY_3_confidence	Confidence of third row in summary statistics ID statistics		1		0.66		Fraction to %	100		Statistics - Protein Summary Table	Percent Confidence of first row in Summary Statistics ID Statistics	66
RESULTS_GROUPRESULTSUMMARY_3_distinctpeptides	Distinct peptides associated with 66% confidence proteins		1		2063					Statistics - Protein Summary Table	Distinct peptides associated with 66% confidence proteins	2063
RESULTS_GROUPRESULTSUMMARY_3_proteinsbeforegroupping	Proteins before grouping (66% confidence)		1		675					Statistics - Protein Summary Table	Proteins before grouping (66% confidence)	675
RESULTS_GROUPRESULTSUMMARY_3_proteinsidentified	Proteins detected (66% confidence)		1		113					Statistics - Protein Summary Table	Proteins detected (66% confidence)	113
RESULTS_GROUPRESULTSUMMARY_3_spectraidentified	Spectra associated with 66% confidence proteins		1		15424					Statistics - Protein Summary Table	Spectra associated with 66% confidence proteins	15424
RESULTS_GROUPRESULTSUMMARY_4_confidence	Confidence of fourth row in Summary Statistics ID statistics		1		0.100088		Fraction to %	100		Statistics - Protein Summary Table	Percent Confidence of first row in Summary Statistics ID Statistics	10.0088
RESULTS_GROUPRESULTSUMMARY_4_distinctpeptides	Distinct peptides associated with 10% confidence proteins		1		2161					Statistics - Protein Summary Table	Distinct peptides associated with 10% confidence proteins	2161
RESULTS_GROUPRESULTSUMMARY_4_proteinsbeforegroupping	Proteins before grouping (10% confidence)		1		858					Statistics - Protein Summary Table	Proteins before grouping (10% confidence)	858
RESULTS_GROUPRESULTSUMMARY_4_proteinsidentified	Proteins detected (10% confidence)		1		174					Statistics - Protein Summary Table	Proteins detected (10% confidence)	174
RESULTS_GROUPRESULTSUMMARY_4_spectraidentified	Spectra associated with 10% confidence proteins		1		16345					Statistics - Protein Summary Table	Spectra associated with 10% confidence proteins	16345
PARAMETERS_PEAKLIST_partnumber	Number of segments the input data are broken into	1	1	1	50					Parameters - Search Dimension Factors	Number of segments the input data are broken into	50
				1						Parameters - Search Dimension Factors	Number of searches per segment (2 for Thorough, 1 for Rapid)	2
				1						Parameters - Search Dimension Factors	Number of apparent sub-searches in group file	100
RESULTS_SEARCH_1_PARAMETERS_do_reverse_search	Do reversed search		1		TRUE					Parameters - Search Dimension Factors	Do reversed search	TRUE
RESULTS_SEARCH_1_PARAMETERS_QUANT_TYPE_separate_searches	Do separate searches for each plex in MS1 quantitation		1		FALSE					Parameters - Search Dimension Factors	Do separate searches for each plex in MS1 quantitation	FALSE
RESULTS_SEARCH_1_PARAMETERS_maxresults	Maximum number of hypotheses to keep per spectrum		1		15					Parameters - Search Dimension Factors	Maximum number of hypotheses to keep per spectrum	15
RESULTS_SEARCH_1_PARAMETERS_MSTOLERANCE_type	MS1 initial mass error tolerance type		1		dalton					Parameters - Identification - Mass accuracy	MS1 initial mass error tolerance type	dalton
RESULTS_SEARCH_1_PARAMETERS_MSTOLERANCE_value	MS1 initial mass error tolerance value		1		0.05					Parameters - Identification - Mass accuracy	MS1 initial mass error tolerance value	0.05
RESULTS_SEARCH_1_PARAMETERS_MSMSTOLERANCE_type	MS2 initial mass error tolerance type		1		dalton					Parameters - Identification - Mass accuracy	MS2 initial mass error tolerance type	dalton
RESULTS_SEARCH_1_PARAMETERS_MSMSTOLERANCE_value	MS2 initial mass error tolerance value		1		0.1					Parameters - Identification - Mass accuracy	MS2 initial mass error tolerance value	0.1
RESULTS_SEARCH_1_PARAMETERS_MS_STANDARD_DEVIATION_type	MS1 final mass error standard deviation type		1		dalton					Parameters - Identification - Mass accuracy	MS1 final mass error standard deviation type	dalton
RESULTS_SEARCH_1_PARAMETERS_MS_STANDARD_DEVIATION_value	MS1 final mass error standard deviation value		1		0.0011					Parameters - Identification - Mass accuracy	MS1 final mass error standard deviation value	0.0011
RESULTS_SEARCH_1_PARAMETERS_MSMS_STANDARD_DEVIATION_type	MS2 final mass error standard deviation type		1		dalton					Parameters - Identification - Mass accuracy	MS2 final mass error standard deviation type	dalton
RESULTS_SEARCH_1_PARAMETERS_MSMS_STANDARD_DEVIATION_value	MS2 final mass error standard deviation value		1		0.01					Parameters - Identification - Mass accuracy	MS2 final mass error standard deviation value	0.01
RESULTS_SEARCH_1_PARAMETERS_do_multiprecursor_search	Use multi-precursor search function		1		TRUE					Parameters - Identification - Multi-precursor search	Use multi-precursor search function	TRUE
RESULTS_SEARCH_1_PARAMETERS_MAX_PRECURSORS_FRAGLET	Maximum number of different precursor masses to try to match to in the Fraglet stage when doing multi-precursor search		1		5					Parameters - Identification - Multi-precursor search	Maximum number of different precursor masses to try to match to in the Fraglet stage when doing multi-precursor search	5
RESULTS_SEARCH_1_PARAMETERS_PRECURSORS_DR_FRAGLET	Maximum dynamic range gap of secondary precursors vs primary precursor in the Fraglet stage when doing multi-precursor search		1		10					Parameters - Identification - Multi-precursor search	Maximum dynamic range gap of secondary precursors vs primary precursor in the Fraglet stage when doing multi-precursor search	10
RESULTS_SEARCH_1_PARAMETERS_MAX_PRECURSORS_TAGLET	Maximum number of different precursor masses to try to match to in the Taglet stage when doing multi-precursor search		1		1					Parameters - Identification - Multi-precursor search	Maximum number of different precursor masses to try to match to in the Taglet stage when doing multi-precursor search	1
RESULTS_SEARCH_1_PARAMETERS_PRECURSORS_DR_TAGLET	Maximum dynamic range gap of secondary precursors vs primary precursor in the Taglet stage when doing multi-precursor search		1		3					Parameters - Identification - Multi-precursor search	Maximum dynamic range gap of secondary precursors vs primary precursor in the Taglet stage when doing multi-precursor search	3
RESULTS_SEARCH_1_PARAMETERS_DEFAULT_CHARGE_STATE_1_charge	First charge state to consider when precursor z is not determined		1		2					Parameters - Identification - Charge ambiguity	First charge state to consider when precursor z is not determined	2
RESULTS_SEARCH_1_PARAMETERS_DEFAULT_CHARGE_STATE_1_probability	Probability of first charge state to consider when precursor z is not determined		1		1					Parameters - Identification - Charge ambiguity	Probability of first charge state to consider when precursor z is not determined	1
RESULTS_SEARCH_1_PARAMETERS_DEFAULT_CHARGE_STATE_2_charge	Second charge state to consider when precursor z is not determined		1		3					Parameters - Identification - Charge ambiguity	Second charge state to consider when precursor z is not determined	3
RESULTS_SEARCH_1_PARAMETERS_DEFAULT_CHARGE_STATE_2_probability	Probability of second charge state to consider when precursor z is not determined		1		1					Parameters - Identification - Charge ambiguity	Probability of second charge state to consider when precursor z is not determined	1
RESULTS_SEARCH_1_PARAMETERS_DEFAULT_CHARGE_STATE_3_charge	Third charge state to consider when precursor z is not determined		1		4					Parameters - Identification - Charge ambiguity	Third charge state to consider when precursor z is not determined	4
RESULTS_SEARCH_1_PARAMETERS_DEFAULT_CHARGE_STATE_3_probability	Probability of third charge state to consider when precursor z is not determined		1		1					Parameters - Identification - Charge ambiguity	Probability of third charge state to consider when precursor z is not determined	1
RESULTS_SEARCH_1_PARAMETERS_DEFAULT_CHARGE_STATE_4_charge	Fourth charge state to consider when precursor z is not determined									Parameters - Identification - Charge ambiguity	Fourth charge state to consider when precursor z is not determined
RESULTS_SEARCH_1_PARAMETERS_DEFAULT_CHARGE_STATE_4_probability	Probability of fourth charge state to consider when precursor z is not determined									Parameters - Identification - Charge ambiguity	Probability of fourth charge state to consider when precursor z is not determined
RESULTS_SEARCH_1_PARAMETERS_PROGROUP_bayesconfidencecalclulation	Use Bayesian protein confidence calculation		1		TRUE					Parameters - Protein Grouping	Use Bayesian protein confidence calculation	TRUE
RESULTS_SEARCH_1_PARAMETERS_PROGROUP_calibrateconfidence	Use peptide FDR analysis to recalibrate peptide confidences		1		TRUE					Parameters - Protein Grouping	Use peptide FDR analysis to recalibrate peptide confidences	TRUE
RESULTS_SEARCH_1_PARAMETERS_PROGROUP_focusingintersection	In mid-Pro Group, minimum Intersection ProtScore to be in Same Group		1		4					Parameters - Protein Grouping	In mid-Pro Group, minimum Intersection ProtScore to be in Same Group	4
RESULTS_SEARCH_1_PARAMETERS_PROGROUP_focusingminunusedprotscore	In mid-Pro Group, minimum Unused ProtScore to keep a Group		1		0.1					Parameters - Protein Grouping	In mid-Pro Group, minimum Unused ProtScore to keep a Group	0.1
RESULTS_SEARCH_1_PARAMETERS_PROGROUP_focusingsubsetcutoff	In mid-Pro Group, keep competitor proteins with ProtScore units from winner		1		6					Parameters - Protein Grouping	In mid-Pro Group, keep competitor proteins with ProtScore units from winner	6
RESULTS_SEARCH_1_PARAMETERS_PROGROUP_intersection	In final Pro Group, minimum Intersection ProtScore to be in same group		1		1.3					Parameters - Protein Grouping	In final Pro Group, minimum Intersection ProtScore to be in same group	1.3
RESULTS_SEARCH_1_PARAMETERS_PROGROUP_minunusedprotscore	In final Pro Group, minimum Unused ProtScore to keep a group		1		0.0458					Parameters - Protein Grouping	In final Pro Group, minimum Unused ProtScore to keep a group	0.0458
RESULTS_SEARCH_1_PARAMETERS_PROGROUP_subsetcutoff	In final Pro Group, keep competitor proteins with ProtScore units from winner		1		2					Parameters - Protein Grouping	In final Pro Group, keep competitor proteins with ProtScore units from winner	2
RESULTS_SEARCH_1_PARAMETERS_QUANT_TYPE_background_correction	Do isobaric quant background correction algorithm		1		FALSE					Parameters - Quantitation - processing	Do isobaric quant background correction algorithm	FALSE
RESULTS_SEARCH_1_PARAMETERS_QUANT_TYPE_bias_correction	Normalize the central tendency of protein ratios to be unity		1		TRUE					Parameters - Quantitation - processing	Normalize the central tendency of protein ratios to be unity	TRUE
RESULTS_SEARCH_1_PARAMETERS_QUANT_TYPE_median_statistic	Compute protein-level ratios from the median of peptide ratios		1		TRUE					Parameters - Quantitation - processing	Compute protein-level ratios from the median of peptide ratios	TRUE
RESULTS_SEARCH_1_PARAMETERS_QUANT_TYPE_quant_threshold	Quant threshold setting no longer used		1		-1					Parameters - Quantitation - processing	Quant threshold setting no longer used	-1
RESULTS_SEARCH_1_PARAMETERS_QUANT_TYPE_quant_threshold_sn	Use measures for quantitation if signal to noise is greater than		1		9					Parameters - Quantitation - processing	Use measures for quantitation if signal to noise is greater than	9
RESULTS_SEARCH_1_PARAMETERS_max_quant_labels	Maximum number of labels allowed on a peptide for it to be used for quantitation		1		35					Parameters - Quantitation - curation	Maximum number of labels allowed on a peptide for it to be used for quantitation	35
RESULTS_SEARCH_1_PARAMETERS_QUANT_TYPE_keep_extreme_peptides_over_fraction	Include extreme ratios in the protein ratio calculation if the fraction of peptides from a protein having extreme ratios is greater than		1		0					Parameters - Quantitation - curation	Include extreme ratios in the protein ratio calculation if the fraction of peptides from a protein having extreme ratios is greater than	0
RESULTS_SEARCH_1_PARAMETERS_QUANT_TYPE_low_confidence_check	Exclude quantitation data if identification confidence does not pass a threshold value		1		TRUE					Parameters - Quantitation - curation	Exclude quantitation data if identification confidence does not pass a threshold value	TRUE
RESULTS_SEARCH_1_PARAMETERS_QUANT_TYPE_low_intensity_check	Exclude quantitation data if a minimum intensity is not passed		1		TRUE					Parameters - Quantitation - curation	Exclude quantitation data if a minimum intensity is not passed	TRUE
RESULTS_SEARCH_1_PARAMETERS_QUANT_TYPE_mod_check	Exclude quantitation data based on discordant peptide logic		1		TRUE					Parameters - Quantitation - curation	Exclude quantitation data based on discordant peptide logic	TRUE
RESULTS_SEARCH_1_PARAMETERS_QUANT_TYPE_shared_msms_check	Exclude quantitation data using sharing logic		1		TRUE					Parameters - Quantitation - curation	Exclude quantitation data using sharing logic	TRUE
RESULTS_SEARCH_1_PARAMETERS_PROGROUP_unusedprotscorethresholdforexcludingothersfromquant	Minimum protein confidence to consider a protein confident and capable of excluding spectra as shared		1		1.3					Parameters - Quantitation - curation	Minimum protein confidence to consider a protein confident and capable of excluding spectra as shared	1.3
RESULTS_SEARCH_1_PARAMETERS_PROGROUP_confidencepercentthresholdforexcludingothersfromquant	Minimum peptide percent confidence from a confident protein to consider a spectrum shared		1		15					Parameters - Quantitation - curation	Minimum peptide percent confidence from a confident protein to consider a spectrum shared	15
RESULTS_SEARCH_1_PARAMETERS_PROGROUP_confidencepercentthresholdforincludingselfinquant	Minimum peptide confidence to be used for quantitation		1		15					Parameters - Quantitation - curation	Minimum peptide confidence to be used for quantitation	15
RESULTS_SEARCH_1_PARAMETERS_PROGROUP_autodiscordantpeptidethreshold	Consider a peptide discordant if joint feature probability less than		1		0.3					Parameters - Quantitation - curation	Consider a peptide discordant if joint feature probability less than	0.3
RESULTS_SEARCH_1_PARAMETERS_PROGROUP_compresspeptides	Show results only for distinct peptides, suppressing redundancy		1		FALSE					Parameters - Non-functional	Show results only for distinct peptides, suppressing redundancy	FALSE
RESULTS_SEARCH_1_PARAMETERS_PROGROUP_donotstoremspeaklists	Do not store MS1 level data		1		FALSE					Parameters - Non-functional	Do not store MS1 level data	FALSE
RESULTS_SEARCH_STAT_search_begin_time_clock	Start time - Search		1		01/19/2021 16:09:14					Statistics - Processing Times - Start&Stop Clock Times	Start time - Search	01/19/2021 16:09:14
RESULTS_SEARCH_STAT_search_end_time_clock	End time - Search		1		01/20/2021 19:26:40					Statistics - Processing Times - Start&Stop Clock Times	End time - Search	01/20/2021 19:26:40
RESULTS_SEARCH_STAT_stage_searching_begin_time_clock	Start time - Identification algorithm stages		1		01/20/2021 16:38:01					Statistics - Processing Times - Start&Stop Clock Times	Start time - Identification algorithm stages	01/20/2021 16:38:01
RESULTS_SEARCH_STAT_stage_searching_end_time_clock	End time - Identification algorithm stages		1		01/20/2021 19:24:28					Statistics - Processing Times - Start&Stop Clock Times	End time - Identification algorithm stages	01/20/2021 19:24:28
RESULTS_SEARCH_STAT_stage_signal_processing_begin_time_clock	Start time - Signal processing stage		1		01/19/2021 16:09:15					Statistics - Processing Times - Start&Stop Clock Times	Start time - Signal processing stage	01/19/2021 16:09:15
RESULTS_SEARCH_STAT_stage_signal_processing_end_time_clock	End time - Signal processing stage		1		01/20/2021 16:35:01					Statistics - Processing Times - Start&Stop Clock Times	End time - Signal processing stage	01/20/2021 16:35:01
RESULTS_SEARCH_STAT_stage_waiting_begin_time_clock	Start time - Waiting stage		1		01/20/2021 16:35:01					Statistics - Processing Times - Start&Stop Clock Times	Start time - Waiting stage	01/20/2021 16:35:01
RESULTS_SEARCH_STAT_stage_waiting_end_time_clock	End time - Waiting stage		1		01/20/2021 16:38:01					Statistics - Processing Times - Start&Stop Clock Times	End time - Waiting stage	01/20/2021 16:38:01
RESULTS_SEARCH_STAT_task_fraglet_exe_begin_time_clock	Start time - Fraglet Algorithm search stage		1		01/20/2021 17:52:26					Statistics - Processing Times - Start&Stop Clock Times	Start time - Fraglet Algorithm search stage	01/20/2021 17:52:26
RESULTS_SEARCH_STAT_task_fraglet_exe_end_time_clock	End time - Fraglet Algorithm search stage		1		01/20/2021 18:31:27					Statistics - Processing Times - Start&Stop Clock Times	End time - Fraglet Algorithm search stage	01/20/2021 18:31:27
RESULTS_SEARCH_STAT_task_focusing_begin_time_clock	Start time - Mid-Pro Group Algorithm stage		1		01/20/2021 18:31:27					Statistics - Processing Times - Start&Stop Clock Times	Start time - Mid-Pro Group Algorithm stage	01/20/2021 18:31:27
RESULTS_SEARCH_STAT_task_focusing_end_time_clock	End time - Mid-Pro Group Algorithm stage		1		01/20/2021 18:37:17					Statistics - Processing Times - Start&Stop Clock Times	End time - Mid-Pro Group Algorithm stage	01/20/2021 18:37:17
RESULTS_SEARCH_STAT_task_taglet_exe_begin_time_clock	Start time - Taglet Algorithm search stage		1		01/20/2021 18:37:17					Statistics - Processing Times - Start&Stop Clock Times	Start time - Taglet Algorithm search stage	01/20/2021 18:37:17
RESULTS_SEARCH_STAT_task_taglet_exe_end_time_clock	End time - Taglet Algorithm search stage		1		01/20/2021 19:13:04					Statistics - Processing Times - Start&Stop Clock Times	End time - Taglet Algorithm search stage	01/20/2021 19:13:04
RESULTS_SEARCH_STAT_task_progroup_begin_time_clock	Start time - Final Pro Group Algorithm stage		1		01/20/2021 19:13:04					Statistics - Processing Times - Start&Stop Clock Times	Start time - Final Pro Group Algorithm stage	01/20/2021 19:13:04
RESULTS_SEARCH_STAT_task_progroup_end_time_clock	End time - Final Pro Group Algorithm stage		1		01/20/2021 19:24:28					Statistics - Processing Times - Start&Stop Clock Times	End time - Final Pro Group Algorithm stage	01/20/2021 19:24:28
RESULTS_SEARCH_STAT_stage_fdr_begin_time_clock	Start time - FDR analysis stage		1		01/20/2021 19:24:28					Statistics - Processing Times - Start&Stop Clock Times	Start time - FDR analysis stage	01/20/2021 19:24:28
RESULTS_SEARCH_STAT_stage_fdr_end_time_clock	End time - FDR analysis stage		1		01/20/2021 19:26:40					Statistics - Processing Times - Start&Stop Clock Times	End time - FDR analysis stage	01/20/2021 19:26:40
RESULTS_SEARCH_STAT_search_time_duration	Clock Time Duration for Full Search (ms)		1		98245232		msec to min	1.66667e-05		Statistics - Processing Times - Duration in Real Clock Times	Clock time duration - Full search (min)	1637.42
RESULTS_SEARCH_STAT_stage_searching_time_duration	Clock Time Duration for Identification Algorithm Stages (ms)		1		9986586		msec to min	1.66667e-05		Statistics - Processing Times - Duration in Real Clock Times	Clock time duration - Identification algorithm stages (min)	166.443
RESULTS_SEARCH_STAT_stage_signal_processing_time_duration	Clock Time Duration for Waiting Stage (ms)		1		87945573		msec to min	1.66667e-05		Statistics - Processing Times - Duration in Real Clock Times	Clock time duration - Signal processing stage (min)	1465.76
RESULTS_SEARCH_STAT_stage_waiting_time_duration	Clock Time Duration for Signal Processing Stage (ms)		1		180233		msec to min	1.66667e-05		Statistics - Processing Times - Duration in Real Clock Times	Clock time duration - Waiting stage (min)	3.00388
RESULTS_SEARCH_STAT_task_fraglet_exe_time_duration	Clock Time Duration for Fraglet Algorithm Stage (ms)		1		2340994		msec to min	1.66667e-05		Statistics - Processing Times - Duration in Real Clock Times	Clock time duration - Fraglet Algorithm stage (min)	39.0166
RESULTS_SEARCH_STAT_task_focusing_time_duration	Clock Time Duration for Mid-Pro Group Algorithm Stage (ms)		1		349562		msec to min	1.66667e-05		Statistics - Processing Times - Duration in Real Clock Times	Clock time duration - Mid-Pro Group Algorithm stage (min)	5.82603
RESULTS_SEARCH_STAT_task_taglet_exe_time_duration	Clock Time Duration for Taglet Algorithm Stage (ms)		1		2147157		msec to min	1.66667e-05		Statistics - Processing Times - Duration in Real Clock Times	Clock time duration - Taglet Algorithm stage (min)	35.7859
RESULTS_SEARCH_STAT_task_progroup_time_duration	Clock Time Duration for Pro Group Algorithm Stage (ms)		1		683571		msec to min	1.66667e-05		Statistics - Processing Times - Duration in Real Clock Times	Clock time duration - Pro Group Algorithm stage (min)	11.3929
RESULTS_SEARCH_STAT_stage_fdr_time_duration	Clock Time Duration for FDR Analysis (ms)		1		131325		msec to min	1.66667e-05		Statistics - Processing Times - Duration in Real Clock Times	Clock time duration - FDR Analysis (min)	2.18875
				1						Statistics - Processing Times - Duration in Real Clock Times	Clock time not accounted for in measured stages	74.447
	CPU Time Duration for Signal Processing Stage (ms)						msec to min	1.66667e-05		Statistics - Processing Times - Duration in CPU Time	CPU time duration - Signal Processing stage (min)
RESULTS_SEARCH_STAT_task_fraglet_exe_time_cpu	CPU Time Duration for Fraglet Algorithm Stage (ms)		1		8651300		msec to min	1.66667e-05		Statistics - Processing Times - Duration in CPU Time	CPU time duration - Fraglet Algorithm stage (min)	144.188
RESULTS_SEARCH_STAT_task_focusing_time_cpu	CPU Time Duration for Mid-Pro Group Algorithm Stage (ms)		1		393262		msec to min	1.66667e-05		Statistics - Processing Times - Duration in CPU Time	CPU time duration - Mid-Pro Group Algorithm stage (min)	6.55437
RESULTS_SEARCH_STAT_task_taglet_exe_time_cpu	CPU Time Duration for Taglet Algorithm Stage (ms)		1		14609602		msec to min	1.66667e-05		Statistics - Processing Times - Duration in CPU Time	CPU time duration - Taglet Algorithm stage (min)	243.493
RESULTS_SEARCH_STAT_task_progroup_time_cpu	CPU Time Duration for Pro Group Algorithm Stage (ms)		1		710381		msec to min	1.66667e-05		Statistics - Processing Times - Duration in CPU Time	CPU time duration - Pro Group Algorithm stage (min)	11.8397
				1						Statistics - Processing Times - Percent by Stage	Percent of clock time - Identification Algorithm stages	0.10165
				1						Statistics - Processing Times - Percent by Stage	Percent of clock time - Signal Processing stage	0.895164
				1						Statistics - Processing Times - Percent by Stage	Percent of clock time - Waiting stage	0.00183452
				1						Statistics - Processing Times - Percent by Stage	Percent of clock time - Fraglet Algorithm stage	0.0238281
				1						Statistics - Processing Times - Percent by Stage	Percent of clock time - Mid-Pro Group Algorithm stage	0.00355806
				1						Statistics - Processing Times - Percent by Stage	Percent of clock time - Taglet Algorithm stage	0.0218551
				1						Statistics - Processing Times - Percent by Stage	Percent of clock time - Pro Group Algorithm stage	0.0069578
				1						Statistics - Processing Times - Percent by Stage	Percent of clock time - FDR Analysis	0.00133671
				1						Statistics - Processing Rate - Clock (Sec/Spectrum)	Clock time rate (sec/spect) - Full Search	0.61812
				1						Statistics - Processing Rate - Clock (Sec/Spectrum)	Clock time rate (sec/spect) - Identification Algorithm stages	0.0628316
				1						Statistics - Processing Rate - Clock (Sec/Spectrum)	Clock time rate (sec/spect) - Signal processing stage	0.553319
				1						Statistics - Processing Rate - Clock (Sec/Spectrum)	Clock time rate (sec/spect) - Waiting stage	0.00113395
				1						Statistics - Processing Rate - Clock (Sec/Spectrum)	Clock time rate (sec/spect) - Fraglet Algorithm stage	0.0147286
				1						Statistics - Processing Rate - Clock (Sec/Spectrum)	Clock time rate (sec/spect) - Mid-Pro Group Algorithm stage	0.00219931
				1						Statistics - Processing Rate - Clock (Sec/Spectrum)	Clock time rate (sec/spect) - Taglet Algorithm stage	0.0135091
				1						Statistics - Processing Rate - Clock (Sec/Spectrum)	Clock time rate (sec/spect) - Pro Group Algorithm stage	0.00430076
				1						Statistics - Processing Rate - Clock (Sec/Spectrum)	Clock time rate (sec/spect) - FDR Analysis	0.000826245
				1						Statistics - Processing Rate - CPU (Sec/Spectrum)	CPU time rate (sec/spect) - Signal processing stage
				1						Statistics - Processing Rate - CPU (Sec/Spectrum)	CPU time rate (sec/spect) - Fraglet Algorithm stage	0.0544305
				1						Statistics - Processing Rate - CPU (Sec/Spectrum)	CPU time rate (sec/spect) - Mid-Pro Group Algorithm stage	0.00247425
				1						Statistics - Processing Rate - CPU (Sec/Spectrum)	CPU time rate (sec/spect) - Taglet Algorithm stage	0.0919178
				1						Statistics - Processing Rate - CPU (Sec/Spectrum)	CPU time rate (sec/spect) - Pro Group Algorithm stage	0.00446944
				1						Statistics - Processing Rate - Clock (Sec/Spectrum/DB Protein)	Clock time rate (sec/spect/DB protein) - Full search	4.10918e-06
				1						Statistics - Processing Rate - Clock (Sec/Spectrum/DB Protein)	Clock time rate (sec/spect/DB protein) - Identification algorithm stages	4.17697e-07
				1						Statistics - Processing Rate - Clock (Sec/Spectrum/DB Protein)	Clock time rate (sec/spect/DB protein) - Signal processing stage	3.67839e-06
				1						Statistics - Processing Rate - Clock (Sec/Spectrum/DB Protein)	Clock time rate (sec/spect/DB protein) - Waiting stage	7.53839e-09
				1						Statistics - Processing Rate - Clock (Sec/Spectrum/DB Protein)	Clock time rate (sec/spect/DB protein) - Fraglet Algorithm stage	9.79139e-08
				1						Statistics - Processing Rate - Clock (Sec/Spectrum/DB Protein)	Clock time rate (sec/spect/DB protein) - Mid-Pro Group Algorithm stage	1.46207e-08
				1						Statistics - Processing Rate - Clock (Sec/Spectrum/DB Protein)	Clock time rate (sec/spect/DB protein) - Taglet Algorithm stage	8.98065e-08
				1						Statistics - Processing Rate - Clock (Sec/Spectrum/DB Protein)	Clock time rate (sec/spect/DB protein) - Pro Group Algorithm stage	2.85909e-08
				1						Statistics - Processing Rate - Clock (Sec/Spectrum/DB Protein)	Clock time rate (sec/spect/DB protein) - FDR Analysis	5.49277e-09
				1						Statistics - Processing Rate - CPU (Sec/Spectrum/DB Protein)	CPU time rate (sec/spect/DB protein) - Signal processing stage
				1						Statistics - Processing Rate - CPU (Sec/Spectrum/DB Protein)	CPU time rate (sec/spect/DB protein) - Fraglet Algorithm stage	3.61847e-07
				1						Statistics - Processing Rate - CPU (Sec/Spectrum/DB Protein)	CPU time rate (sec/spect/DB protein) - Mid-Pro Group Algorithm stage	1.64485e-08
				1						Statistics - Processing Rate - CPU (Sec/Spectrum/DB Protein)	CPU time rate (sec/spect/DB protein) - Taglet Algorithm stage	6.11058e-07
				1						Statistics - Processing Rate - CPU (Sec/Spectrum/DB Protein)	CPU time rate (sec/spect/DB protein) - Pro Group Algorithm stage	2.97122e-08
				1						Statistics - Extent of Distribution - Fundamental	Distribution factor - CPU vs. clock time - Signal processing stage
				1						Statistics - Extent of Distribution - Fundamental	Distribution factor - CPU vs. clock time - Fraglet Algorithm stage	3.69557
				1						Statistics - Extent of Distribution - Fundamental	Distribution factor - CPU vs. clock time - Mid-Pro Group Algorithm stage	1.12501
				1						Statistics - Extent of Distribution - Fundamental	Distribution factor - CPU vs. clock time - Taglet Algorithm stage	6.80416
				1						Statistics - Extent of Distribution - Fundamental	Distribution factor - CPU vs. clock time - Pro Group Algorithm stage	1.03922
				1						Statistics - Extent of Distribution - vs Segments	Ratio of distribution factor to number of search segments - Signal processing stage
				1						Statistics - Extent of Distribution - vs Segments	Ratio of distribution factor to number of search segments - Fraglet Algorithm stage	0.0739113
				1						Statistics - Extent of Distribution - vs Segments	Ratio of distribution factor to number of search segments - Mid-Pro Group Algorithm stage	0.0225003
				1						Statistics - Extent of Distribution - vs Segments	Ratio of distribution factor to number of search segments - Taglet Algorithm stage	0.136083
				1						Statistics - Extent of Distribution - vs Segments	Ratio of distribution factor to number of search segments - Pro Group Algorithm stage	0.0207844
				1						Statistics - Extent of Distribution - vs Licensed Cores	Ratio of distribution factor to number of licensed cores - Signal processing stage
				1						Statistics - Extent of Distribution - vs Licensed Cores	Ratio of distribution factor to number of licensed cores - Fraglet Algorithm stage	0.230973
				1						Statistics - Extent of Distribution - vs Licensed Cores	Ratio of distribution factor to number of licensed cores - Mid-Pro Group Algorithm stage	0.0703133
				1						Statistics - Extent of Distribution - vs Licensed Cores	Ratio of distribution factor to number of licensed cores - Taglet Algorithm stage	0.42526
				1						Statistics - Extent of Distribution - vs Licensed Cores	Ratio of distribution factor to number of licensed cores - Pro Group Algorithm stage	0.0649513
PARAMETERS_PEAKLIST_original_count	Average number of spectra per segment	1	1	1	3178.84					Statistics - Search Segmentation	Average number of spectra per segment	3178.84
PARAMETERS_PEAKLIST_original_count	Standard deviation of number of spectra per segment	1	1	1	497.386					Statistics - Search Segmentation	Standard deviation of number of spectra per segment	497.386
PARAMETERS_PEAKLIST_original_count	Maximum number of spectra per segment	1	1	1	3909					Statistics - Search Segmentation	Maximum number of spectra per segment	3909
PARAMETERS_PEAKLIST_original_count	Minimum number of spectra per segment	1	1	1	2184					Statistics - Search Segmentation	Minimum number of spectra per segment	2184
										Attributes - Input data filenames	Filename of Input File 1	C:\AB SCIEX\ProteinPilot Data\Results\Albert\ZX 20200624 6600\ZX 20200624 C4A Control 1.wiff
										Attributes - Input data filenames	Filename of Input File 2	C:\AB SCIEX\ProteinPilot Data\Results\Albert\ZX 20200624 6600\ZX 20200624 C4A Control 2.wiff
										Attributes - Input data filenames	Filename of Input File 3	C:\AB SCIEX\ProteinPilot Data\Results\Albert\ZX 20200624 6600\ZX 20200624 C4A Control 3.wiff
										Attributes - Input data filenames	Filename of Input File 4	C:\AB SCIEX\ProteinPilot Data\Results\Albert\ZX 20200624 6600\ZX 20200624 C4A Control 4.wiff
										Attributes - Input data filenames	Filename of Input File 5	C:\AB SCIEX\ProteinPilot Data\Results\Albert\ZX 20200624 6600\ZX 20200624 C4A Control 5.wiff
										Attributes - Input data filenames	Filename of Input File 6	C:\AB SCIEX\ProteinPilot Data\Results\Albert\ZX 20200624 6600\ZX 20200624 C4A Control 6.wiff
										Attributes - Input data filenames	Filename of Input File 7	C:\AB SCIEX\ProteinPilot Data\Results\Albert\ZX 20200624 6600\ZX 20200624 C4A Control 7.wiff
										Attributes - Input data filenames	Filename of Input File 8	C:\AB SCIEX\ProteinPilot Data\Results\Albert\ZX 20200624 6600\ZX 20200624 C4A Control 8.wiff
										Attributes - Input data filenames	Filename of Input File 9	C:\AB SCIEX\ProteinPilot Data\Results\Albert\ZX 20200624 6600\ZX 20200624 C4A Control 9.wiff
										Attributes - Input data filenames	Filename of Input File 10	C:\AB SCIEX\ProteinPilot Data\Results\Albert\ZX 20200624 6600\ZX 20200624 C4A Control 10.wiff
										Attributes - Input data filenames	Filename of Input File 11	C:\AB SCIEX\ProteinPilot Data\Results\Albert\ZX 20200624 6600\ZX 20200624 C4A Control 11.wiff
										Attributes - Input data filenames	Filename of Input File 12	C:\AB SCIEX\ProteinPilot Data\Results\Albert\ZX 20200819 6600\ZX 20200819 6600 C4A Control 1.wiff
										Attributes - Input data filenames	Filename of Input File 13	C:\AB SCIEX\ProteinPilot Data\Results\Albert\ZX 20200819 6600\ZX 20200819 6600 C4A Control 2.wiff
										Attributes - Input data filenames	Filename of Input File 14	C:\AB SCIEX\ProteinPilot Data\Results\Albert\ZX 20200819 6600\ZX 20200819 6600 C4A Control 3.wiff
										Attributes - Input data filenames	Filename of Input File 15	C:\AB SCIEX\ProteinPilot Data\Results\Albert\ZX 20200819 6600\ZX 20200819 6600 C4A Control 4.wiff
										Attributes - Input data filenames	Filename of Input File 16	C:\AB SCIEX\ProteinPilot Data\Results\Albert\ZX 20200819 6600\ZX 20200819 6600 C4A Control 5.wiff
										Attributes - Input data filenames	Filename of Input File 17	C:\AB SCIEX\ProteinPilot Data\Results\Albert\ZX 20200819 6600\ZX 20200819 6600 C4A Control 6.wiff
										Attributes - Input data filenames	Filename of Input File 18	C:\AB SCIEX\ProteinPilot Data\Results\Albert\ZX 20200819 6600\ZX 20200819 6600 C4A Control 7.wiff
										Attributes - Input data filenames	Filename of Input File 19	C:\AB SCIEX\ProteinPilot Data\Results\Albert\ZX 20200819 6600\ZX 20200819 6600 C4A Control 8.wiff
										Attributes - Input data filenames	Filename of Input File 20	C:\AB SCIEX\ProteinPilot Data\Results\Albert\ZX 20200819 6600\ZX 20200819 6600 C4A Control 9.wiff
										Attributes - Input data filenames	Filename of Input File 21	C:\AB SCIEX\ProteinPilot Data\Results\Albert\ZX 20200819 6600\ZX 20200819 6600 C4A Control 10.wiff
										Attributes - Input data filenames	Filename of Input File 22	C:\AB SCIEX\ProteinPilot Data\Results\Albert\ZX 20200819 6600\ZX 20200819 6600 C4A Control 11.wiff
										Attributes - Input data filenames	Filename of Input File 23	C:\AB SCIEX\ProteinPilot Data\Results\Albert\ZX 20200819 6600\ZX 20200819 6600 C4A Control 12.wiff
										Attributes - Input data filenames	Filename of Input File 24	C:\AB SCIEX\ProteinPilot Data\Results\Albert\ZX 20200819 6600\ZX 20200819 6600 C4A Control 13.wiff
										Attributes - Input data filenames	Filename of Input File 25	C:\AB SCIEX\ProteinPilot Data\Results\Albert\ZX 20200819 6600\ZX 20200819 6600 C4A Control 14.wiff
										Attributes - Input data filenames	Filename of Input File 26	C:\AB SCIEX\ProteinPilot Data\Results\Albert\ZX 20200819 6600\ZX 20200819 6600 C4A Control 15.wiff
										Attributes - Input data filenames	Filename of Input File 27
										Attributes - Input data filenames	Filename of Input File 28
										Attributes - Input data filenames	Filename of Input File 29
										Attributes - Input data filenames	Filename of Input File 30
										Attributes - Input data filenames	Filename of Input File 31
										Attributes - Input data filenames	Filename of Input File 32
										Attributes - Input data filenames	Filename of Input File 33
										Attributes - Input data filenames	Filename of Input File 34
										Attributes - Input data filenames	Filename of Input File 35
										Attributes - Input data filenames	Filename of Input File 36
										Attributes - Input data filenames	Filename of Input File 37
										Attributes - Input data filenames	Filename of Input File 38
										Attributes - Input data filenames	Filename of Input File 39
										Attributes - Input data filenames	Filename of Input File 40
										Attributes - Input data filenames	Filename of Input File 41
										Attributes - Input data filenames	Filename of Input File 42
										Attributes - Input data filenames	Filename of Input File 43
										Attributes - Input data filenames	Filename of Input File 44
										Attributes - Input data filenames	Filename of Input File 45
										Attributes - Input data filenames	Filename of Input File 46
										Attributes - Input data filenames	Filename of Input File 47
										Attributes - Input data filenames	Filename of Input File 48
										Attributes - Input data filenames	Filename of Input File 49
										Attributes - Input data filenames	Filename of Input File 50
										Attributes - Input data filenames	Filename of Input File 51
										Attributes - Input data filenames	Filename of Input File 52
										Attributes - Input data filenames	Filename of Input File 53
										Attributes - Input data filenames	Filename of Input File 54
										Attributes - Input data filenames	Filename of Input File 55
										Attributes - Input data filenames	Filename of Input File 56
										Attributes - Input data filenames	Filename of Input File 57
										Attributes - Input data filenames	Filename of Input File 58
										Attributes - Input data filenames	Filename of Input File 59
										Attributes - Input data filenames	Filename of Input File 60
										Attributes - Input data filenames	Filename of Input File 61
										Attributes - Input data filenames	Filename of Input File 62
										Attributes - Input data filenames	Filename of Input File 63
										Attributes - Input data filenames	Filename of Input File 64
										Attributes - Input data filenames	Filename of Input File 65
										Attributes - Input data filenames	Filename of Input File 66
										Attributes - Input data filenames	Filename of Input File 67
										Attributes - Input data filenames	Filename of Input File 68
										Attributes - Input data filenames	Filename of Input File 69
										Attributes - Input data filenames	Filename of Input File 70
										Attributes - Input data filenames	Filename of Input File 71
										Attributes - Input data filenames	Filename of Input File 72
										Attributes - Input data filenames	Filename of Input File 73
										Attributes - Input data filenames	Filename of Input File 74
										Attributes - Input data filenames	Filename of Input File 75
										Attributes - Input data filenames	Filename of Input File 76
										Attributes - Input data filenames	Filename of Input File 77
										Attributes - Input data filenames	Filename of Input File 78
										Attributes - Input data filenames	Filename of Input File 79
										Attributes - Input data filenames	Filename of Input File 80
										Attributes - Input data filenames	Filename of Input File 81
										Attributes - Input data filenames	Filename of Input File 82
										Attributes - Input data filenames	Filename of Input File 83
										Attributes - Input data filenames	Filename of Input File 84
										Attributes - Input data filenames	Filename of Input File 85
										Attributes - Input data filenames	Filename of Input File 86
										Attributes - Input data filenames	Filename of Input File 87
										Attributes - Input data filenames	Filename of Input File 88
										Attributes - Input data filenames	Filename of Input File 89
										Attributes - Input data filenames	Filename of Input File 90
										Attributes - Input data filenames	Filename of Input File 91
										Attributes - Input data filenames	Filename of Input File 92
										Attributes - Input data filenames	Filename of Input File 93
										Attributes - Input data filenames	Filename of Input File 94
										Attributes - Input data filenames	Filename of Input File 95
										Attributes - Input data filenames	Filename of Input File 96
										Attributes - Input data filenames	Filename of Input File 97
										Attributes - Input data filenames	Filename of Input File 98
										Attributes - Input data filenames	Filename of Input File 99
										Attributes - Input data filenames	Filename of Input File 100
										Attributes - Input data filenames	Filename of Input File 101
										Attributes - Input data filenames	Filename of Input File 102
										Attributes - Input data filenames	Filename of Input File 103
										Attributes - Input data filenames	Filename of Input File 104
										Attributes - Input data filenames	Filename of Input File 105
										Attributes - Input data filenames	Filename of Input File 106
										Attributes - Input data filenames	Filename of Input File 107
										Attributes - Input data filenames	Filename of Input File 108
										Attributes - Input data filenames	Filename of Input File 109
										Attributes - Input data filenames	Filename of Input File 110
										Attributes - Input data filenames	Filename of Input File 111
										Attributes - Input data filenames	Filename of Input File 112
										Attributes - Input data filenames	Filename of Input File 113
										Attributes - Input data filenames	Filename of Input File 114
										Attributes - Input data filenames	Filename of Input File 115
										Attributes - Input data filenames	Filename of Input File 116
										Attributes - Input data filenames	Filename of Input File 117
										Attributes - Input data filenames	Filename of Input File 118
										Attributes - Input data filenames	Filename of Input File 119
										Attributes - Input data filenames	Filename of Input File 120
										Attributes - Input data filenames	Filename of Input File 121
										Attributes - Input data filenames	Filename of Input File 122
										Attributes - Input data filenames	Filename of Input File 123
										Attributes - Input data filenames	Filename of Input File 124
										Attributes - Input data filenames	Filename of Input File 125
										Attributes - Input data filenames	Filename of Input File 126
										Attributes - Input data filenames	Filename of Input File 127
										Attributes - Input data filenames	Filename of Input File 128
										Attributes - Input data filenames	Filename of Input File 129
										Attributes - Input data filenames	Filename of Input File 130
										Attributes - Input data filenames	Filename of Input File 131
										Attributes - Input data filenames	Filename of Input File 132
										Attributes - Input data filenames	Filename of Input File 133
										Attributes - Input data filenames	Filename of Input File 134
										Attributes - Input data filenames	Filename of Input File 135
										Attributes - Input data filenames	Filename of Input File 136
										Attributes - Input data filenames	Filename of Input File 137
										Attributes - Input data filenames	Filename of Input File 138
										Attributes - Input data filenames	Filename of Input File 139
										Attributes - Input data filenames	Filename of Input File 140
										Attributes - Input data filenames	Filename of Input File 141
										Attributes - Input data filenames	Filename of Input File 142
										Attributes - Input data filenames	Filename of Input File 143
										Attributes - Input data filenames	Filename of Input File 144
										Attributes - Input data filenames	Filename of Input File 145
										Attributes - Input data filenames	Filename of Input File 146
										Attributes - Input data filenames	Filename of Input File 147
										Attributes - Input data filenames	Filename of Input File 148
										Attributes - Input data filenames	Filename of Input File 149
										Attributes - Input data filenames	Filename of Input File 150
										Attributes - Input data filenames	Filename of Input File 151
										Attributes - Input data filenames	Filename of Input File 152
										Attributes - Input data filenames	Filename of Input File 153
										Attributes - Input data filenames	Filename of Input File 154
										Attributes - Input data filenames	Filename of Input File 155
										Attributes - Input data filenames	Filename of Input File 156
										Attributes - Input data filenames	Filename of Input File 157
										Attributes - Input data filenames	Filename of Input File 158
										Attributes - Input data filenames	Filename of Input File 159
										Attributes - Input data filenames	Filename of Input File 160
										Attributes - Input data filenames	Filename of Input File 161
										Attributes - Input data filenames	Filename of Input File 162
										Attributes - Input data filenames	Filename of Input File 163
										Attributes - Input data filenames	Filename of Input File 164
										Attributes - Input data filenames	Filename of Input File 165
										Attributes - Input data filenames	Filename of Input File 166
										Attributes - Input data filenames	Filename of Input File 167
										Attributes - Input data filenames	Filename of Input File 168
										Attributes - Input data filenames	Filename of Input File 169
										Attributes - Input data filenames	Filename of Input File 170
										Attributes - Input data filenames	Filename of Input File 171
										Attributes - Input data filenames	Filename of Input File 172
										Attributes - Input data filenames	Filename of Input File 173
										Attributes - Input data filenames	Filename of Input File 174
										Attributes - Input data filenames	Filename of Input File 175
										Attributes - Input data filenames	Filename of Input File 176
										Attributes - Input data filenames	Filename of Input File 177
										Attributes - Input data filenames	Filename of Input File 178
										Attributes - Input data filenames	Filename of Input File 179
										Attributes - Input data filenames	Filename of Input File 180
										Attributes - Input data filenames	Filename of Input File 181
										Attributes - Input data filenames	Filename of Input File 182
										Attributes - Input data filenames	Filename of Input File 183
										Attributes - Input data filenames	Filename of Input File 184
										Attributes - Input data filenames	Filename of Input File 185
										Attributes - Input data filenames	Filename of Input File 186
										Attributes - Input data filenames	Filename of Input File 187
										Attributes - Input data filenames	Filename of Input File 188
										Attributes - Input data filenames	Filename of Input File 189
										Attributes - Input data filenames	Filename of Input File 190
										Attributes - Input data filenames	Filename of Input File 191
										Attributes - Input data filenames	Filename of Input File 192
										Attributes - Input data filenames	Filename of Input File 193
										Attributes - Input data filenames	Filename of Input File 194
										Attributes - Input data filenames	Filename of Input File 195
										Attributes - Input data filenames	Filename of Input File 196
										Attributes - Input data filenames	Filename of Input File 197
										Attributes - Input data filenames	Filename of Input File 198
										Attributes - Input data filenames	Filename of Input File 199
										Attributes - Input data filenames	Filename of Input File 200

## Sheet: Protein Level Data
Protein Level Data	Unused ProtScore Threshold	Confidence Threshold	Forward	Reverse	Correct	Incorrect	Total	Global FDR	q-value	Fit Unused ProtScore Threshold	Fit Confidence Threshold	Fit Forward	Fit Reverse	Fit Correct	Fit Incorrect	Fit Total	Fit Global FDR	Fit Local FDR
	161.86	1	1	0	1	0	1	0	0	161.86	1	1	1.71918e-08	1	3.43837e-08	1	3.43837e-08	3.43839e-08
	147.13	1	2	0	2	0	2	0	0	147.13	1	2	3.43839e-08	2	6.87678e-08	2	3.43839e-08	3.43841e-08
	102.11	1	3	0	3	0	3	0	0	102.11	1	3	5.15762e-08	3	1.03152e-07	3	3.43841e-08	3.43845e-08
	87.35	1	4	0	4	0	4	0	0	87.35	1	4	6.87686e-08	4	1.37537e-07	4	3.43843e-08	3.43849e-08
	60.91	1	5	0	5	0	5	0	0	60.91	1	5	8.59613e-08	5	1.71923e-07	5	3.43845e-08	3.43853e-08
	58.01	1	6	0	6	0	6	0	0	58.01	1	6	1.03154e-07	6	2.06308e-07	6	3.43847e-08	3.43858e-08
	43.64	1	7	0	7	0	7	0	0	43.64	1	7	1.20347e-07	7	2.40695e-07	7	3.43849e-08	3.43862e-08
	41.84	1	8	0	8	0	8	0	0	41.84	1	8	1.37541e-07	8	2.75081e-07	8	3.43851e-08	3.43866e-08
	39.26	1	9	0	9	0	9	0	0	39.26	1	9	1.54734e-07	9	3.09468e-07	9	3.43853e-08	3.4387e-08
	38.79	1	10	0	10	0	10	0	0	38.79	1	10	1.71928e-07	10	3.43856e-07	10	3.43856e-08	3.43874e-08
	30.02	1	11	0	11	0	11	0	0	30.02	1	11	1.89122e-07	11	3.78243e-07	11	3.43858e-08	3.43878e-08
	28.3	1	12	0	12	0	12	0	0	28.3	1	12	2.06316e-07	12	4.12632e-07	12	3.4386e-08	3.43882e-08
	27.99	1	13	0	13	0	13	0	0	27.99	1	13	2.2351e-07	13	4.4702e-07	13	3.43862e-08	3.43886e-08
	22.83	1	14	0	14	0	14	0	0	22.83	1	14	2.40705e-07	14	4.81409e-07	14	3.43864e-08	3.43891e-08
	20.57	1	15	0	15	0	15	0	0	20.57	1	15	2.57899e-07	15	5.15799e-07	15	3.43866e-08	3.43895e-08
	19.56	1	16	0	16	0	16	0	0	19.56	1	16	2.75094e-07	16	5.50189e-07	16	3.43868e-08	3.43899e-08
	16.14	1	17	0	17	0	17	0	0	16.14	1	17	2.92289e-07	17	5.84579e-07	17	3.4387e-08	3.43903e-08
	14.08	1	18	0	18	0	18	0	0	14.08	1	18	3.09485e-07	18	6.1897e-07	18	3.43872e-08	3.43907e-08
	13.79	1	19	0	19	0	19	0	0	13.79	1	19	3.2668e-07	19	6.53361e-07	19	3.43874e-08	3.43911e-08
	13.72	1	20	0	20	0	20	0	0	13.72	1	20	3.43876e-07	20	6.87752e-07	20	3.43876e-08	3.43916e-08
	12.6	1	21	0	21	0	21	0	0	12.6	1	21	3.61072e-07	21	7.22145e-07	21	3.43879e-08	3.43924e-08
	12.33	1	22	0	22	0	22	0	0	12.33	1	22	3.7827e-07	22	7.56539e-07	22	3.43881e-08	3.43941e-08
	12.23	1	23	0	23	0	23	0	0	12.23	1	23	3.95469e-07	23	7.90938e-07	23	3.43886e-08	3.43989e-08
	11.97	1	24	0	24	0	24	0	0	11.97	1	24	4.12676e-07	24	8.25352e-07	24	3.43897e-08	3.44129e-08
	11.7	1	25	0	25	0	25	0	0	11.7	1	25	4.29903e-07	25	8.59806e-07	25	3.43922e-08	3.44511e-08
	11.64	1	26	0	26	0	26	0	0	11.64	1	26	4.47179e-07	26	8.94359e-07	26	3.43984e-08	3.45478e-08
	10.44	1	27	0	27	0	27	0	0	10.44	1	27	4.64573e-07	27	9.29146e-07	27	3.44128e-08	3.47761e-08
	10.41	1	28	0	28	0	28	0	0	10.41	1	28	4.82224e-07	28	9.64448e-07	28	3.44446e-08	3.52801e-08
	9.73	1	29	0	29	0	29	0	0	9.73	1	29	5.00409e-07	29	1.00082e-06	29	3.4511e-08	3.63287e-08
	9.25	1	30	0	30	0	30	0	0	9.25	1	30	5.19644e-07	30	1.03929e-06	30	3.4643e-08	3.83964e-08
	8.83	1	31	0	31	0	31	0	0	8.83	1	31	5.40848e-07	31	1.0817e-06	31	3.48934e-08	4.22808e-08
	8.68	1	32	0	32	0	32	0	0	8.68	1	32	5.65586e-07	32	1.13117e-06	32	3.53491e-08	4.92666e-08
	8.5	1	33	0	33	0	33	0	0	8.5	1	33	5.96424e-07	33	1.19285e-06	33	3.61469e-08	6.13434e-08
	8.34	1	34	0	34	0	34	0	0	8.34	1	34	6.37422e-07	34	1.27484e-06	34	3.74954e-08	8.14858e-08
	8.3	1	35	0	35	0	35	0	0	8.3	1	35	6.94804e-07	35	1.38961e-06	35	3.97031e-08	1.14002e-07
	7.91	1	36	0	36	0	36	0	0	7.91	1	36	7.77833e-07	36	1.55567e-06	36	4.3213e-08	1.64953e-07
	7.32	1	37	0	37	0	37	0	0	7.32	1	37	8.99939e-07	37	1.79988e-06	37	4.86453e-08	2.42644e-07
	7.23	1	38	0	38	0	38	0	0	7.23	1	38	1.08012e-06	38	2.16023e-06	38	5.68483e-08	3.58186e-07
	5.73	0.999998	39	0	39	0	39	0	0	5.73	0.999998	39	1.34465e-06	39	2.6893e-06	39	6.89564e-08	5.2612e-07
	5.36	0.999996	40	0	40	0	40	0	0	5.36	0.999996	40	1.72916e-06	40	3.45832e-06	40	8.6458e-08	7.65098e-07
	4.42	0.999962	41	0	41	0	41	0	0	4.42	0.999962	41	2.28103e-06	41	4.56205e-06	41	1.1127e-07	1.0986e-06
	4.35	0.999955	42	0	42	0	42	0	0	4.35	0.999955	42	3.06218e-06	42	6.12436e-06	42	1.45818e-07	1.5557e-06
	4.28	0.999948	43	0	43	0	43	0	0	4.28	0.999948	43	4.15229e-06	43	8.30457e-06	43	1.9313e-07	2.17183e-06
	4.22	0.99994	44	0	44	0	44	0	0	4.22	0.99994	44	5.6523e-06	44	1.13046e-05	44	2.56923e-07	2.98954e-06
	4.11	0.999922	46	0	46	0	46	0	0	4.11	0.999922	45	7.68841e-06	45	1.53768e-05	45	3.41707e-07	4.70677e-06
	4.04	0.999909	47	0	47	0	47	0	0	4.11	0.999922	46	1.04164e-05	46	2.08327e-05	46	4.52885e-07	4.70677e-06
	4.01	0.999902	49	0	49	0	49	0	0	4.04	0.999909	47	1.40261e-05	47	2.80522e-05	47	5.96855e-07	7.20044e-06
	4	0.9999	51	0	51	0	51	0	0	4.01	0.999902	48	1.87468e-05	48	3.74935e-05	48	7.81115e-07	1.07267e-05
	3.74	0.999818	52	0	52	0	52	0	0	4.01	0.999902	49	2.4852e-05	49	4.97039e-05	49	1.01437e-06	1.07267e-05
	3.5	0.999684	53	0	53	0	53	0	0	4	0.9999	50	3.26653e-05	49.9999	6.53306e-05	50	1.30661e-06	1.75779e-05
	3.47	0.999661	54	0	54	0	54	0	0	4	0.9999	51	4.25663e-05	50.9999	8.51325e-05	51	1.66926e-06	1.75779e-05
	3.4	0.999602	55	0	55	0	55	0	0	3.74	0.999818	51.9999	5.49961e-05	51.9999	0.000109992	52	2.11523e-06	2.48173e-05
	3.28	0.999475	56	0	56	0	56	0	0	3.5	0.999684	52.9999	7.04641e-05	52.9999	0.000140928	53	2.65902e-06	3.08875e-05
	3.1	0.999206	57	0	57	0	57	0	0	3.47	0.999661	53.9999	8.95543e-05	53.9998	0.000179109	54	3.31683e-06	3.8125e-05
	2.95	0.998878	58	0	58	0	58	0	0	3.4	0.999602	54.9999	0.000112932	54.9998	0.000225863	55	4.10661e-06	4.66921e-05
	2.84	0.998555	59	0	59	0	59	0	0	3.28	0.999475	55.9999	0.000141349	55.9997	0.000282699	56	5.04819e-06	5.67648e-05
	2.64	0.997709	60	0	60	0	60	0	0	3.1	0.999206	56.9998	0.000175656	56.9996	0.000351311	57	6.16336e-06	6.85334e-05
	2.62	0.997601	61	0	61	0	61	0	0	2.95	0.998878	57.9998	0.000216802	57.9996	0.000433603	58	7.47592e-06	8.22034e-05
	2.6	0.997488	62	0	62	0	62	0	0	2.84	0.998555	58.9997	0.000265849	58.9995	0.000531697	59	9.01182e-06	9.79958e-05
	2.46	0.996533	63	0	63	0	63	0	0	2.64	0.997709	59.9997	0.000323977	59.9994	0.000647955	60	1.07992e-05	0.000116148
	2.43	0.996285	64	0	64	0	64	0	0	2.62	0.997601	60.9996	0.000392496	60.9992	0.000784992	61	1.28687e-05	0.000136917
	2.41	0.99611	65	0	65	0	65	0	0	2.6	0.997488	61.9995	0.000472851	61.9991	0.000945703	62	1.52533e-05	0.000160578
	2.35	0.995533	66	0	66	0	66	0	0	2.46	0.996533	62.9994	0.000566638	62.9989	0.00113328	63	1.79885e-05	0.000187427
	2.33	0.995323	68	0	68	0	68	0	0	2.43	0.996285	63.9993	0.000675612	63.9986	0.00135122	64	2.11129e-05	0.000217788
	2.2	0.99369	69	0	69	0	69	0	0	2.41	0.99611	64.9992	0.000801705	64.9984	0.00160341	65	2.46678e-05	0.000252009
	2.09	0.991872	70	0	70	0	70	0	0	2.35	0.995533	65.9991	0.000947037	65.9981	0.00189407	66	2.86981e-05	0.000290469
	2.03	0.990667	71	0	71	0	71	0	0	2.33	0.995323	66.9989	0.00111394	66.9978	0.00222787	67	3.32518e-05	0.000357033
	2.02	0.99045	72	0	72	0	72	0	0	2.33	0.995323	67.9987	0.00130496	67.9974	0.00260993	68	3.83813e-05	0.000357033
	2.01	0.990228	74	0	74	0	74	0	0	2.2	0.99369	68.9985	0.00152293	68.997	0.00304585	69	4.41428e-05	0.00043567
	2	0.99	88	0	88	0	88	0	0	2.09	0.991872	69.9982	0.00177092	69.9965	0.00354184	70	5.05977e-05	0.000495703
	1.82	0.984864	89	0	89	0	89	0	0	2.03	0.990667	70.9979	0.00205235	70.9959	0.0041047	71	5.78126e-05	0.000562544
	1.74	0.981803	91	0	91	0	91	0	0	2.02	0.99045	71.9976	0.00237097	71.9953	0.00474194	72	6.58603e-05	0.000636897
	1.7	0.980047	92	0	92	0	92	0	0	2.01	0.990228	72.9973	0.00273094	72.9945	0.00546188	73	7.48202e-05	0.000764274
	1.64	0.977091	93	0	93	0	93	0	0	2.01	0.990228	73.9969	0.00313686	73.9937	0.00627372	74	8.478e-05	0.000764274
	1.36	0.956348	94	0	94	0	94	0	0	2	0.99	74.9964	0.00359385	74.9928	0.00718769	75	9.58359e-05	0.00192607
	1.1	0.920567	95	0	95	0	95	0	0	2	0.99	75.9959	0.0041076	75.9918	0.0082152	76	0.000108095	0.00192607
	1.08	0.916824	96	0	96	0	96	0	0	2	0.99	76.9953	0.00468449	76.9906	0.00936899	77	0.000121675	0.00192607
	1.07	0.914886	97	0	97	0	97	0	0	2	0.99	77.9947	0.00533166	77.9893	0.0106633	78	0.000136709	0.00192607
	1.05	0.910875	98	0	98	0	98	0	0	2	0.99	78.9939	0.00605714	78.9879	0.0121143	79	0.000153345	0.00192607
	0.99	0.897671	99	0	99	0	99	0	0	2	0.99	79.9931	0.00686998	79.9863	0.01374	80	0.000171749	0.00192607
	0.89	0.871175	100	0	100	0	100	0	0	2	0.99	80.9922	0.00778044	80.9844	0.0155609	81	0.00019211	0.00192607
	0.86	0.861962	101	0	101	0	101	0	0	2	0.99	81.9912	0.00880018	81.9824	0.0176004	82	0.000214639	0.00192607
	0.74	0.81803	102	0	102	0	102	0	0	2	0.99	82.9901	0.00994247	82.9801	0.0198849	83	0.000239578	0.00192607
	0.7	0.800474	103	0	103	0	103	0	0	2	0.99	83.9888	0.0112225	83.9776	0.022445	84	0.000267202	0.00192607
	0.69	0.795826	104	0	104	0	104	0	0	2	0.99	84.9873	0.0126577	84.9747	0.0253153	85	0.000297827	0.00192607
	0.68	0.79107	104	1	103	2	105	0.0190476	0.0168067	2	0.99	85.9857	0.014268	85.9715	0.028536	86	0.000331814	0.00192607
	0.64	0.770913	105	1	104	2	106	0.0188679	0.0168067	2	0.99	86.9839	0.0160767	86.9678	0.0321535	87	0.00036958	0.00192607
	0.62	0.760117	106	1	105	2	107	0.0186916	0.0168067	2	0.99	87.9819	0.0181106	87.9638	0.0362212	88	0.000411604	0.00192607
	0.61	0.754529	107	1	106	2	108	0.0185185	0.0168067	1.82	0.984864	88.9796	0.0204007	88.9592	0.0408015	89	0.000458444	0.0045773
	0.59	0.74296	108	1	107	2	109	0.0183486	0.0168067	1.74	0.981803	89.977	0.0229835	89.954	0.045967	90	0.000510744	0.00548527
	0.56	0.724577	109	1	108	2	110	0.0181818	0.0168067	1.74	0.981803	90.9741	0.0259013	90.9482	0.0518026	91	0.000569259	0.00548527
	0.54	0.711597	110	1	109	2	111	0.018018	0.0168067	1.7	0.980047	91.9708	0.0292038	91.9416	0.0584077	92	0.000634866	0.00660022
	0.49	0.676406	112	1	111	2	113	0.0176991	0.0168067	1.64	0.977091	92.9671	0.0329495	92.9341	0.0658991	93	0.000708592	0.00748573
	0.45	0.645187	113	1	112	2	114	0.0175439	0.0168067	1.36	0.956348	93.9628	0.0372073	93.9256	0.0744146	94	0.000791645	0.00850874
	0.42	0.619811	114	1	113	2	115	0.0173913	0.0168067	1.1	0.920567	94.9579	0.0420584	94.9159	0.0841167	95	0.000885439	0.00969413
	0.39	0.59262	115	1	114	2	116	0.0172414	0.0168067	1.08	0.916824	95.9524	0.0475989	95.9048	0.0951978	96	0.000991644	0.0110716
	0.38	0.583131	116	1	115	2	117	0.017094	0.0168067	1.07	0.914886	96.9461	0.053943	96.8921	0.107886	97	0.00111223	0.0126769
	0.31	0.510221	118	1	117	2	119	0.0168067	0.0168067	1.05	0.910875	97.9388	0.0612259	97.8775	0.122452	98	0.00124951	0.0145526
	0.26	0.450459	118	2	116	4	120	0.0333333	0.0322581	0.99	0.897671	98.9304	0.0696086	98.8608	0.139217	99	0.00140623	0.0167494
	0.25	0.437659	120	2	118	4	122	0.0327869	0.0322581	0.89	0.871175	99.9207	0.0792821	99.8414	0.158564	100	0.00158564	0.0193282
	0.23	0.411156	122	2	120	4	124	0.0322581	0.0322581	0.86	0.861962	100.91	0.0904737	100.819	0.180947	101	0.00179156	0.0223608
	0.21	0.383405	122	3	119	6	125	0.048	0.0458015	0.74	0.81803	101.897	0.103453	101.793	0.206906	102	0.00202849	0.025932
	0.19	0.354346	124	3	121	6	127	0.0472441	0.0458015	0.7	0.800474	102.881	0.118539	102.763	0.237079	103	0.00230173	0.0301413
	0.18	0.339307	125	3	122	6	128	0.046875	0.0458015	0.69	0.795826	103.864	0.13611	103.728	0.272219	104	0.00261749	0.0351037
	0.17	0.323917	127	3	124	6	130	0.0461538	0.0458015	0.68	0.79107	104.843	0.156606	104.687	0.313213	105	0.00298298	0.0409505
	0.16	0.308169	128	3	125	6	131	0.0458015	0.0458015	0.64	0.770913	105.819	0.180545	105.639	0.361091	106	0.00340652	0.0478287
	0.15	0.292054	129	4	125	8	133	0.0601504	0.0601504	0.62	0.760117	106.791	0.208523	106.583	0.417046	107	0.00389763	0.0558988
	0.14	0.275564	130	5	125	10	135	0.0740741	0.0740741	0.61	0.754529	107.759	0.24122	107.518	0.48244	108	0.00446704	0.0653296
	0.13	0.25869	130	6	124	12	136	0.0882353	0.0882353	0.59	0.74296	108.721	0.2794	108.441	0.5588	109	0.00512661	0.0762902
	0.12	0.241422	131	7	124	14	138	0.101449	0.100719	0.56	0.724577	109.676	0.323907	109.352	0.647814	110	0.00588922	0.0889375
	0.11	0.223753	132	7	125	14	139	0.100719	0.100719	0.54	0.711597	110.624	0.375646	110.249	0.751293	111	0.0067684	0.1034
	0.1	0.205672	135	9	126	18	144	0.125	0.125	0.49	0.676406	111.564	0.435565	111.129	0.871131	112	0.00777795	0.128655
	0.09	0.187169	138	10	128	20	148	0.135135	0.135135	0.49	0.676406	112.495	0.504615	111.991	1.00923	113	0.00893124	0.128655
	0.08	0.168236	140	12	128	24	152	0.157895	0.157895	0.45	0.645187	113.416	0.583709	112.833	1.16742	114	0.0102405	0.158119
	0.07	0.148862	142	14	128	28	156	0.179487	0.179487	0.42	0.619811	114.326	0.673673	113.653	1.34735	115	0.0117161	0.17987
	0.06	0.129036	147	19	128	38	166	0.228916	0.228916	0.39	0.59262	115.225	0.775198	114.45	1.5504	116	0.0133655	0.203007
	0.05	0.108749	149	25	124	50	174	0.287356	0.287356	0.38	0.583131	116.111	0.888798	115.222	1.7776	117	0.0151931	0.227173
										0.31	0.510221	116.985	1.01478	115.97	2.02957	118	0.0171997	0.264463
										0.31	0.510221	117.847	1.15326	116.693	2.30652	119	0.0193826	0.264463
										0.26	0.450459	118.696	1.30414	117.392	2.60829	120	0.0217357	0.301783
										0.25	0.437659	119.533	1.46718	118.066	2.93436	121	0.0242509	0.337997
										0.25	0.437659	120.358	1.642	118.716	3.28401	122	0.0269181	0.337997
										0.23	0.411156	121.172	1.82818	119.344	3.65637	123	0.0297266	0.383408
										0.23	0.411156	121.975	2.02526	119.949	4.05052	124	0.0326654	0.383408
										0.21	0.383405	122.767	2.23278	120.534	4.46556	125	0.0357245	0.41508
										0.19	0.354346	123.55	2.45034	121.099	4.90069	126	0.0388943	0.444918
										0.19	0.354346	124.322	2.67759	121.645	5.35518	127	0.0421668	0.444918
										0.18	0.339307	125.086	2.91424	122.172	5.82847	128	0.045535	0.473311
										0.17	0.323917	125.84	3.16006	122.68	6.32011	129	0.0489931	0.500695
										0.17	0.323917	126.585	3.41489	123.17	6.82978	130	0.0525367	0.500695
										0.16	0.308169	127.321	3.67862	123.643	7.35725	131	0.0561622	0.527475
										0.15	0.292054	128.049	3.9512	124.098	7.90241	132	0.0598667	0.553986
										0.15	0.292054	128.767	4.23261	124.535	8.46522	133	0.0636482	0.553986
										0.14	0.275564	129.477	4.52285	124.954	9.0457	134	0.0675052	0.589344
										0.14	0.275564	130.178	4.82197	125.356	9.64394	135	0.0714366	0.589344
										0.13	0.25869	130.87	5.13002	125.74	10.26	136	0.0754414	0.616091
										0.12	0.241422	131.553	5.44707	126.106	10.8941	137	0.0795192	0.643157
										0.12	0.241422	132.227	5.7732	126.454	11.5464	138	0.0836696	0.643157
										0.11	0.223753	132.891	6.10851	126.783	12.217	139	0.0878922	0.670604
										0.1	0.205672	133.547	6.45308	127.094	12.9062	140	0.0921868	0.726766
										0.1	0.205672	134.193	6.80701	127.386	13.614	141	0.0965533	0.726766
										0.1	0.205672	134.83	7.17039	127.659	14.3408	142	0.100991	0.726766
										0.1	0.205672	135.457	7.54334	127.913	15.0867	143	0.105501	0.726766
										0.1	0.205672	136.074	7.92593	128.148	15.8519	144	0.110082	0.726766
										0.09	0.187169	136.682	8.31827	128.363	16.6365	145	0.114735	0.814278
										0.09	0.187169	137.28	8.72046	128.559	17.4409	146	0.119458	0.814278
										0.09	0.187169	137.867	9.13258	128.735	18.2652	147	0.124253	0.814278
										0.09	0.187169	138.445	9.55473	128.891	19.1095	148	0.129118	0.814278
										0.08	0.168236	139.013	9.98701	129.026	19.974	149	0.134054	0.895236
										0.08	0.168236	139.571	10.4295	129.141	20.859	150	0.13906	0.895236
										0.08	0.168236	140.118	10.8823	129.235	21.7645	151	0.144136	0.895236
										0.08	0.168236	140.655	11.3454	129.309	22.6909	152	0.149282	0.895236
										0.07	0.148862	141.181	11.8191	129.362	23.6381	153	0.154498	0.978961
										0.07	0.148862	141.697	12.3032	129.394	24.6065	154	0.159782	0.978961
										0.07	0.148862	142.202	12.7981	129.404	25.5961	155	0.165136	0.978961
										0.07	0.148862	142.696	13.3036	129.393	26.6071	156	0.170559	0.978961
										0.06	0.129036	143.18	13.8199	129.36	27.6397	157	0.176049	1
										0.06	0.129036	143.653	14.347	129.306	28.6941	158	0.181608	1
										0.06	0.129036	144.115	14.8851	129.23	29.7702	159	0.187234	1
										0.06	0.129036	144.566	15.4342	129.132	30.8684	160	0.192928	1
										0.06	0.129036	145.006	15.9944	129.011	31.9888	161	0.198688	1
										0.06	0.129036	145.434	16.5657	128.869	33.1314	162	0.204515	1
										0.06	0.129036	145.852	17.1482	128.704	34.2964	163	0.210407	1
										0.06	0.129036	146.258	17.742	128.516	35.484	164	0.216366	1
										0.06	0.129036	146.653	18.3471	128.306	36.6942	165	0.222389	1
										0.06	0.129036	147.036	18.9636	128.073	37.9273	166	0.228478	1
										0.05	0.108749	147.408	19.5916	127.817	39.1832	167	0.23463	1
										0.05	0.108749	147.769	20.2311	127.538	40.4622	168	0.240846	1
										0.05	0.108749	148.118	20.8822	127.236	41.7643	169	0.247126	1
										0.05	0.108749	148.455	21.5448	126.91	43.0897	170	0.253469	1
										0.05	0.108749	148.781	22.2192	126.562	44.4384	171	0.259874	1
										0.05	0.108749	149.095	22.9053	126.189	45.8106	172	0.266341	1
										0.05	0.108749	149.397	23.6032	125.794	47.2063	173	0.272869	1
										0.05	0.108749	149.687	24.3128	125.374	48.6257	174	0.279458	1

## Sheet: Distinct Peptide Level Data
Distinct Peptide Level Data		Confidence Threshold	Forward	Reverse	Correct	Incorrect	Total	Global FDR	q-value		Fit Confidence Threshold	Fit Forward	Fit Reverse	Fit Correct	Fit Incorrect	Fit Total	Fit Global FDR	Fit Local FDR
		1	195	0	195	0	195	0	0		1	1	2.07711e-07	1	4.15422e-07	1	4.15422e-07	4.15482e-07
		0.9999	315	0	315	0	315	0	0		1	2	4.15422e-07	2	8.30844e-07	2	4.15422e-07	4.15482e-07
		0.9998	331	0	331	0	331	0	0		1	3	6.23134e-07	3	1.24627e-06	3	4.15422e-07	4.15482e-07
		0.9997	375	0	375	0	375	0	0		1	4	8.30846e-07	4	1.66169e-06	4	4.15423e-07	4.15482e-07
		0.9996	409	0	409	0	409	0	0		1	5	1.03856e-06	5	2.07712e-06	5	4.15423e-07	4.15482e-07
		0.9995	417	0	417	0	417	0	0		1	6	1.24627e-06	6	2.49254e-06	6	4.15423e-07	4.15482e-07
		0.9994	492	0	492	0	492	0	0		1	7	1.45398e-06	7	2.90797e-06	7	4.15424e-07	4.15482e-07
		0.9993	543	0	543	0	543	0	0		1	8	1.6617e-06	8	3.32339e-06	8	4.15424e-07	4.15482e-07
		0.9992	564	0	564	0	564	0	0		1	9	1.86941e-06	9	3.73882e-06	9	4.15424e-07	4.15482e-07
		0.9991	590	0	590	0	590	0	0		1	10	2.07712e-06	10	4.15425e-06	10	4.15425e-07	4.15482e-07
		0.999	598	0	598	0	598	0	0		1	11	2.28484e-06	11	4.56967e-06	11	4.15425e-07	4.15482e-07
		0.9989	603	0	603	0	603	0	0		1	12	2.49255e-06	12	4.9851e-06	12	4.15425e-07	4.15482e-07
		0.9988	605	0	605	0	605	0	0		1	13	2.70027e-06	13	5.40053e-06	13	4.15426e-07	4.15482e-07
		0.9987	611	0	611	0	611	0	0		1	14	2.90798e-06	14	5.81596e-06	14	4.15426e-07	4.15482e-07
		0.9986	615	0	615	0	615	0	0		1	15	3.1157e-06	15	6.23139e-06	15	4.15426e-07	4.15482e-07
		0.9985	622	0	622	0	622	0	0		1	16	3.32341e-06	16	6.64682e-06	16	4.15426e-07	4.15482e-07
		0.9984	627	0	627	0	627	0	0		1	17	3.53113e-06	17	7.06225e-06	17	4.15427e-07	4.15482e-07
		0.9983	629	0	629	0	629	0	0		1	18	3.73884e-06	18	7.47769e-06	18	4.15427e-07	4.15482e-07
		0.9982	664	0	664	0	664	0	0		1	19	3.94656e-06	19	7.89312e-06	19	4.15427e-07	4.15482e-07
		0.9981	665	0	665	0	665	0	0		1	20	4.15428e-06	20	8.30855e-06	20	4.15428e-07	4.15482e-07
		0.998	668	0	668	0	668	0	0		1	21	4.36199e-06	21	8.72399e-06	21	4.15428e-07	4.15482e-07
		0.9979	669	0	669	0	669	0	0		1	22	4.56971e-06	22	9.13942e-06	22	4.15428e-07	4.15482e-07
		0.9978	673	0	673	0	673	0	0		1	23	4.77743e-06	23	9.55486e-06	23	4.15429e-07	4.15482e-07
		0.9977	677	0	677	0	677	0	0		1	24	4.98515e-06	24	9.97029e-06	24	4.15429e-07	4.15482e-07
		0.9975	682	0	682	0	682	0	0		1	25	5.19286e-06	25	1.03857e-05	25	4.15429e-07	4.15482e-07
		0.9974	685	0	685	0	685	0	0		1	26	5.40058e-06	26	1.08012e-05	26	4.1543e-07	4.15482e-07
		0.9973	686	0	686	0	686	0	0		1	27	5.6083e-06	27	1.12166e-05	27	4.1543e-07	4.15482e-07
		0.9972	687	0	687	0	687	0	0		1	28	5.81602e-06	28	1.1632e-05	28	4.1543e-07	4.15482e-07
		0.9971	690	0	690	0	690	0	0		1	29	6.02374e-06	29	1.20475e-05	29	4.1543e-07	4.15482e-07
		0.997	696	0	696	0	696	0	0		1	30	6.23146e-06	30	1.24629e-05	30	4.15431e-07	4.15482e-07
		0.9969	697	0	697	0	697	0	0		1	31	6.43918e-06	31	1.28784e-05	31	4.15431e-07	4.15482e-07
		0.9968	698	0	698	0	698	0	0		1	32	6.6469e-06	32	1.32938e-05	32	4.15431e-07	4.15482e-07
		0.9967	700	0	700	0	700	0	0		1	33	6.85462e-06	33	1.37092e-05	33	4.15432e-07	4.15482e-07
		0.9966	727	0	727	0	727	0	0		1	34	7.06234e-06	34	1.41247e-05	34	4.15432e-07	4.15482e-07
		0.9965	728	0	728	0	728	0	0		1	35	7.27006e-06	35	1.45401e-05	35	4.15432e-07	4.15482e-07
		0.9964	791	0	791	0	791	0	0		1	36	7.47779e-06	36	1.49556e-05	36	4.15433e-07	4.15482e-07
		0.9963	792	0	792	0	792	0	0		1	37	7.68551e-06	37	1.5371e-05	37	4.15433e-07	4.15482e-07
		0.9962	794	0	794	0	794	0	0		1	38	7.89323e-06	38	1.57865e-05	38	4.15433e-07	4.15482e-07
		0.9961	818	0	818	0	818	0	0		1	39	8.10095e-06	39	1.62019e-05	39	4.15433e-07	4.15482e-07
		0.996	820	0	820	0	820	0	0		1	40	8.30868e-06	40	1.66174e-05	40	4.15434e-07	4.15482e-07
		0.9959	821	0	821	0	821	0	0		1	41	8.5164e-06	41	1.70328e-05	41	4.15434e-07	4.15482e-07
		0.9958	829	0	829	0	829	0	0		1	42	8.72412e-06	42	1.74482e-05	42	4.15434e-07	4.15482e-07
		0.9957	831	0	831	0	831	0	0		1	43	8.93185e-06	43	1.78637e-05	43	4.15435e-07	4.15482e-07
		0.9956	836	0	836	0	836	0	0		1	44	9.13957e-06	44	1.82791e-05	44	4.15435e-07	4.15482e-07
		0.9955	841	0	841	0	841	0	0		1	45	9.34729e-06	45	1.86946e-05	45	4.15435e-07	4.15482e-07
		0.9954	843	0	843	0	843	0	0		1	46	9.55502e-06	46	1.911e-05	46	4.15436e-07	4.15482e-07
		0.9953	846	0	846	0	846	0	0		1	47	9.76274e-06	47	1.95255e-05	47	4.15436e-07	4.15482e-07
		0.9952	853	0	853	0	853	0	0		1	48	9.97047e-06	48	1.99409e-05	48	4.15436e-07	4.15482e-07
		0.9951	855	0	855	0	855	0	0		1	49	1.01782e-05	49	2.03564e-05	49	4.15437e-07	4.15482e-07
		0.995	860	0	860	0	860	0	0		1	50	1.03859e-05	50	2.07718e-05	50	4.15437e-07	4.15482e-07
		0.9949	905	0	905	0	905	0	0		1	51	1.05936e-05	51	2.11873e-05	51	4.15437e-07	4.15482e-07
		0.9948	906	0	906	0	906	0	0		1	52	1.08014e-05	52	2.16027e-05	52	4.15437e-07	4.15482e-07
		0.9947	911	0	911	0	911	0	0		1	53	1.10091e-05	53	2.20182e-05	53	4.15438e-07	4.15482e-07
		0.9946	916	0	916	0	916	0	0		1	54	1.12168e-05	54	2.24337e-05	54	4.15438e-07	4.15482e-07
		0.9945	918	0	918	0	918	0	0		1	55	1.14246e-05	55	2.28491e-05	55	4.15438e-07	4.15482e-07
		0.9944	919	0	919	0	919	0	0		1	56	1.16323e-05	56	2.32646e-05	56	4.15439e-07	4.15482e-07
		0.9943	921	0	921	0	921	0	0		1	57	1.184e-05	57	2.368e-05	57	4.15439e-07	4.15482e-07
		0.9942	923	0	923	0	923	0	0		1	58	1.20477e-05	58	2.40955e-05	58	4.15439e-07	4.15482e-07
		0.9941	925	0	925	0	925	0	0		1	59	1.22555e-05	59	2.45109e-05	59	4.1544e-07	4.15482e-07
		0.994	931	0	931	0	931	0	0		1	60	1.24632e-05	60	2.49264e-05	60	4.1544e-07	4.15482e-07
		0.9939	934	0	934	0	934	0	0		1	61	1.26709e-05	61	2.53419e-05	61	4.1544e-07	4.15482e-07
		0.9937	936	0	936	0	936	0	0		1	62	1.28787e-05	62	2.57573e-05	62	4.15441e-07	4.15482e-07
		0.9935	939	0	939	0	939	0	0		1	63	1.30864e-05	63	2.61728e-05	63	4.15441e-07	4.15482e-07
		0.9934	940	0	940	0	940	0	0		1	64	1.32941e-05	64	2.65882e-05	64	4.15441e-07	4.15482e-07
		0.9933	941	0	941	0	941	0	0		1	65	1.35018e-05	65	2.70037e-05	65	4.15441e-07	4.15482e-07
		0.9932	943	0	943	0	943	0	0		1	66	1.37096e-05	66	2.74192e-05	66	4.15442e-07	4.15482e-07
		0.9931	944	0	944	0	944	0	0		1	67	1.39173e-05	67	2.78346e-05	67	4.15442e-07	4.15482e-07
		0.993	946	0	946	0	946	0	0		1	68	1.4125e-05	68	2.82501e-05	68	4.15442e-07	4.15482e-07
		0.9929	954	0	954	0	954	0	0		1	69	1.43328e-05	69	2.86655e-05	69	4.15443e-07	4.15482e-07
		0.9926	960	0	960	0	960	0	0		1	70	1.45405e-05	70	2.9081e-05	70	4.15443e-07	4.15482e-07
		0.9925	967	0	967	0	967	0	0		1	71	1.47482e-05	71	2.94965e-05	71	4.15443e-07	4.15482e-07
		0.9924	968	0	968	0	968	0	0		1	72	1.4956e-05	72	2.99119e-05	72	4.15444e-07	4.15482e-07
		0.9921	970	0	970	0	970	0	0		1	73	1.51637e-05	73	3.03274e-05	73	4.15444e-07	4.15482e-07
		0.9919	973	0	973	0	973	0	0		1	74	1.53714e-05	74	3.07429e-05	74	4.15444e-07	4.15482e-07
		0.9918	975	0	975	0	975	0	0		1	75	1.55792e-05	75	3.11583e-05	75	4.15445e-07	4.15482e-07
		0.9917	979	0	979	0	979	0	0		1	76	1.57869e-05	76	3.15738e-05	76	4.15445e-07	4.15482e-07
		0.9916	986	0	986	0	986	0	0		1	77	1.59946e-05	77	3.19893e-05	77	4.15445e-07	4.15482e-07
		0.9915	988	0	988	0	988	0	0		1	78	1.62024e-05	78	3.24047e-05	78	4.15445e-07	4.15482e-07
		0.9914	990	0	990	0	990	0	0		1	79	1.64101e-05	79	3.28202e-05	79	4.15446e-07	4.15482e-07
		0.9913	992	0	992	0	992	0	0		1	80	1.66178e-05	80	3.32357e-05	80	4.15446e-07	4.15482e-07
		0.9912	999	0	999	0	999	0	0		1	81	1.68256e-05	81	3.36512e-05	81	4.15446e-07	4.15482e-07
		0.9911	1004	0	1004	0	1004	0	0		1	82	1.70333e-05	82	3.40666e-05	82	4.15447e-07	4.15482e-07
		0.991	1007	0	1007	0	1007	0	0		1	83	1.7241e-05	83	3.44821e-05	83	4.15447e-07	4.15482e-07
		0.9909	1008	0	1008	0	1008	0	0		1	84	1.74488e-05	84	3.48976e-05	84	4.15447e-07	4.15482e-07
		0.9908	1010	0	1010	0	1010	0	0		1	85	1.76565e-05	85	3.5313e-05	85	4.15448e-07	4.15482e-07
		0.9907	1013	0	1013	0	1013	0	0		1	86	1.78643e-05	86	3.57285e-05	86	4.15448e-07	4.15482e-07
		0.9906	1014	0	1014	0	1014	0	0		1	87	1.8072e-05	87	3.6144e-05	87	4.15448e-07	4.15482e-07
		0.9903	1021	0	1021	0	1021	0	0		1	88	1.82797e-05	88	3.65595e-05	88	4.15449e-07	4.15482e-07
		0.9902	1024	0	1024	0	1024	0	0		1	89	1.84875e-05	89	3.69749e-05	89	4.15449e-07	4.15482e-07
		0.9901	1027	0	1027	0	1027	0	0		1	90	1.86952e-05	90	3.73904e-05	90	4.15449e-07	4.15482e-07
		0.9899	1028	0	1028	0	1028	0	0		1	91	1.89029e-05	91	3.78059e-05	91	4.15449e-07	4.15482e-07
		0.9898	1029	0	1029	0	1029	0	0		1	92	1.91107e-05	92	3.82214e-05	92	4.1545e-07	4.15482e-07
		0.9897	1033	1	1032	2	1034	0.00193424	0.00161421		1	93	1.93184e-05	93	3.86369e-05	93	4.1545e-07	4.15482e-07
		0.9896	1034	1	1033	2	1035	0.00193237	0.00161421		1	94	1.95262e-05	94	3.90523e-05	94	4.1545e-07	4.15482e-07
		0.9895	1036	1	1035	2	1037	0.00192864	0.00161421		1	95	1.97339e-05	95	3.94678e-05	95	4.15451e-07	4.15482e-07
		0.9894	1038	1	1037	2	1039	0.00192493	0.00161421		1	96	1.99416e-05	96	3.98833e-05	96	4.15451e-07	4.15482e-07
		0.9892	1040	1	1039	2	1041	0.00192123	0.00161421		1	97	2.01494e-05	97	4.02988e-05	97	4.15451e-07	4.15482e-07
		0.9889	1043	1	1042	2	1044	0.00191571	0.00161421		1	98	2.03571e-05	98	4.07143e-05	98	4.15452e-07	4.15482e-07
		0.9888	1046	1	1045	2	1047	0.00191022	0.00161421		1	99	2.05649e-05	99	4.11297e-05	99	4.15452e-07	4.15482e-07
		0.9887	1049	1	1048	2	1050	0.00190476	0.00161421		1	100	2.07726e-05	100	4.15452e-05	100	4.15452e-07	4.15482e-07
		0.9886	1050	1	1049	2	1051	0.00190295	0.00161421		1	101	2.09804e-05	101	4.19607e-05	101	4.15453e-07	4.15482e-07
		0.9884	1053	1	1052	2	1054	0.00189753	0.00161421		1	102	2.11881e-05	102	4.23762e-05	102	4.15453e-07	4.15482e-07
		0.9882	1054	1	1053	2	1055	0.00189573	0.00161421		1	103	2.13958e-05	103	4.27917e-05	103	4.15453e-07	4.15482e-07
		0.9881	1057	1	1056	2	1058	0.00189036	0.00161421		1	104	2.16036e-05	104	4.32072e-05	104	4.15453e-07	4.15482e-07
		0.9879	1059	1	1058	2	1060	0.00188679	0.00161421		1	105	2.18113e-05	105	4.36226e-05	105	4.15454e-07	4.15482e-07
		0.9878	1060	1	1059	2	1061	0.00188501	0.00161421		1	106	2.20191e-05	106	4.40381e-05	106	4.15454e-07	4.15482e-07
		0.9877	1062	1	1061	2	1063	0.00188147	0.00161421		1	107	2.22268e-05	107	4.44536e-05	107	4.15454e-07	4.15482e-07
		0.9876	1065	1	1064	2	1066	0.00187617	0.00161421		1	108	2.24346e-05	108	4.48691e-05	108	4.15455e-07	4.15482e-07
		0.9875	1066	1	1065	2	1067	0.00187441	0.00161421		1	109	2.26423e-05	109	4.52846e-05	109	4.15455e-07	4.15482e-07
		0.9873	1068	1	1067	2	1069	0.00187091	0.00161421		1	110	2.285e-05	110	4.57001e-05	110	4.15455e-07	4.15482e-07
		0.9872	1069	1	1068	2	1070	0.00186916	0.00161421		1	111	2.30578e-05	111	4.61156e-05	111	4.15456e-07	4.15482e-07
		0.987	1072	1	1071	2	1073	0.00186393	0.00161421		1	112	2.32655e-05	112	4.65311e-05	112	4.15456e-07	4.15482e-07
		0.9868	1074	1	1073	2	1075	0.00186047	0.00161421		1	113	2.34733e-05	113	4.69466e-05	113	4.15456e-07	4.15482e-07
		0.9866	1075	1	1074	2	1076	0.00185874	0.00161421		1	114	2.3681e-05	114	4.73621e-05	114	4.15457e-07	4.15482e-07
		0.9865	1076	1	1075	2	1077	0.00185701	0.00161421		1	115	2.38888e-05	115	4.77776e-05	115	4.15457e-07	4.15482e-07
		0.9863	1078	1	1077	2	1079	0.00185357	0.00161421		1	116	2.40965e-05	116	4.81931e-05	116	4.15458e-07	4.15482e-07
		0.9861	1079	1	1078	2	1080	0.00185185	0.00161421		1	117	2.43043e-05	117	4.86086e-05	117	4.15458e-07	4.15482e-07
		0.986	1080	1	1079	2	1081	0.00185014	0.00161421		1	118	2.45121e-05	118	4.90241e-05	118	4.15458e-07	4.15482e-07
		0.9858	1081	1	1080	2	1082	0.00184843	0.00161421		1	119	2.47198e-05	119	4.94396e-05	119	4.15459e-07	4.15482e-07
		0.9856	1082	1	1081	2	1083	0.00184672	0.00161421		1	120	2.49276e-05	120	4.98551e-05	120	4.15459e-07	4.15482e-07
		0.9853	1084	1	1083	2	1085	0.00184332	0.00161421		1	121	2.51353e-05	121	5.02707e-05	121	4.1546e-07	4.15482e-07
		0.9849	1086	1	1085	2	1087	0.00183993	0.00161421		1	122	2.53431e-05	122	5.06862e-05	122	4.15461e-07	4.15482e-07
		0.9848	1088	1	1087	2	1089	0.00183655	0.00161421		1	123	2.55509e-05	123	5.11017e-05	123	4.15461e-07	4.15482e-07
		0.9845	1089	1	1088	2	1090	0.00183486	0.00161421		1	124	2.57586e-05	124	5.15173e-05	124	4.15462e-07	4.15482e-07
		0.9844	1091	1	1090	2	1092	0.0018315	0.00161421		1	125	2.59664e-05	125	5.19328e-05	125	4.15463e-07	4.15482e-07
		0.9842	1092	1	1091	2	1093	0.00182983	0.00161421		1	126	2.61742e-05	126	5.23484e-05	126	4.15463e-07	4.15482e-07
		0.9839	1094	1	1093	2	1095	0.00182648	0.00161421		1	127	2.6382e-05	127	5.2764e-05	127	4.15464e-07	4.15482e-07
		0.9837	1096	1	1095	2	1097	0.00182315	0.00161421		1	128	2.65898e-05	128	5.31796e-05	128	4.15465e-07	4.15482e-07
		0.9835	1097	1	1096	2	1098	0.00182149	0.00161421		1	129	2.67976e-05	129	5.35952e-05	129	4.15467e-07	4.15482e-07
		0.9832	1098	1	1097	2	1099	0.00181984	0.00161421		1	130	2.70054e-05	130	5.40108e-05	130	4.15468e-07	4.15482e-07
		0.983	1100	1	1099	2	1101	0.00181653	0.00161421		1	131	2.72132e-05	131	5.44265e-05	131	4.15469e-07	4.15482e-07
		0.9827	1101	1	1100	2	1102	0.00181488	0.00161421		1	132	2.74211e-05	132	5.48422e-05	132	4.15471e-07	4.15482e-07
		0.9825	1102	1	1101	2	1103	0.00181324	0.00161421		1	133	2.76289e-05	133	5.52579e-05	133	4.15473e-07	4.15482e-07
		0.9824	1103	1	1102	2	1104	0.00181159	0.00161421		1	134	2.78368e-05	134	5.56736e-05	134	4.15475e-07	4.15482e-07
		0.9823	1105	1	1104	2	1106	0.00180832	0.00161421		1	135	2.80447e-05	135	5.60894e-05	135	4.15477e-07	4.15482e-07
		0.9821	1107	1	1106	2	1108	0.00180505	0.00161421		1	136	2.82526e-05	136	5.65052e-05	136	4.1548e-07	4.15482e-07
		0.982	1110	1	1109	2	1111	0.00180018	0.00161421		1	137	2.84605e-05	137	5.69211e-05	137	4.15482e-07	4.15482e-07
		0.9819	1111	1	1110	2	1112	0.00179856	0.00161421		1	138	2.86685e-05	138	5.7337e-05	138	4.15486e-07	4.15482e-07
		0.9817	1112	1	1111	2	1113	0.00179695	0.00161421		1	139	2.88765e-05	139	5.7753e-05	139	4.15489e-07	4.15482e-07
		0.9816	1114	1	1113	2	1115	0.00179372	0.00161421		1	140	2.90845e-05	140	5.81691e-05	140	4.15493e-07	4.15482e-07
		0.9813	1117	1	1116	2	1118	0.00178891	0.00161421		1	141	2.92926e-05	141	5.85852e-05	141	4.15498e-07	4.15482e-07
		0.9808	1118	1	1117	2	1119	0.00178731	0.00161421		1	142	2.95007e-05	142	5.90015e-05	142	4.15503e-07	4.15482e-07
		0.9807	1119	1	1118	2	1120	0.00178571	0.00161421		1	143	2.97089e-05	143	5.94178e-05	143	4.15509e-07	4.15482e-07
		0.9802	1120	1	1119	2	1121	0.00178412	0.00161421		1	144	2.99171e-05	144	5.98342e-05	144	4.15516e-07	4.15482e-07
		0.9801	1121	1	1120	2	1122	0.00178253	0.00161421		1	145	3.01254e-05	145	6.02508e-05	145	4.15523e-07	4.15482e-07
		0.9796	1123	1	1122	2	1124	0.00177936	0.00161421		1	146	3.03338e-05	146	6.06675e-05	146	4.15531e-07	4.15482e-07
		0.9794	1125	1	1124	2	1126	0.0017762	0.00161421		1	147	3.05422e-05	147	6.10844e-05	147	4.1554e-07	4.15482e-07
		0.9787	1128	1	1127	2	1129	0.00177148	0.00161421		1	148	3.07507e-05	148	6.15014e-05	148	4.1555e-07	4.15482e-07
		0.9786	1129	1	1128	2	1130	0.00176991	0.00161421		1	149	3.09593e-05	149	6.19187e-05	149	4.15561e-07	4.15482e-07
		0.9781	1132	1	1131	2	1133	0.00176523	0.00161421		1	150	3.1168e-05	150	6.23361e-05	150	4.15574e-07	4.15482e-07
		0.978	1133	1	1132	2	1134	0.00176367	0.00161421		1	151	3.13769e-05	151	6.27538e-05	151	4.15588e-07	4.15482e-07
		0.9777	1134	1	1133	2	1135	0.00176211	0.00161421		1	152	3.15859e-05	152	6.31717e-05	152	4.15603e-07	4.15482e-07
		0.9776	1135	1	1134	2	1136	0.00176056	0.00161421		1	153	3.1795e-05	153	6.359e-05	153	4.15621e-07	4.15482e-07
		0.9773	1138	1	1137	2	1139	0.00175593	0.00161421		1	154	3.20043e-05	154	6.40085e-05	154	4.1564e-07	4.15482e-07
		0.9772	1139	1	1138	2	1140	0.00175439	0.00161421		1	155	3.22137e-05	155	6.44274e-05	155	4.15661e-07	4.15482e-07
		0.9769	1140	1	1139	2	1141	0.00175285	0.00161421		1	156	3.24233e-05	156	6.48467e-05	156	4.15684e-07	4.15482e-07
		0.9768	1143	1	1142	2	1144	0.00174825	0.00161421		1	157	3.26332e-05	157	6.52664e-05	157	4.1571e-07	4.15482e-07
		0.9765	1145	1	1144	2	1146	0.0017452	0.00161421		1	158	3.28433e-05	158	6.56866e-05	158	4.15738e-07	4.15482e-07
		0.9764	1146	1	1145	2	1147	0.00174368	0.00161421		1	159	3.30536e-05	159	6.61073e-05	159	4.15769e-07	4.15482e-07
		0.9761	1147	1	1146	2	1148	0.00174216	0.00161421		1	160	3.32642e-05	160	6.65285e-05	160	4.15803e-07	4.15482e-07
		0.9759	1148	1	1147	2	1149	0.00174064	0.00161421		1	161	3.34752e-05	161	6.69503e-05	161	4.15841e-07	4.15482e-07
		0.9757	1150	1	1149	2	1151	0.00173762	0.00161421		1	162	3.36864e-05	162	6.73728e-05	162	4.15882e-07	4.15482e-07
		0.9755	1151	1	1150	2	1152	0.00173611	0.00161421		1	163	3.3898e-05	163	6.77961e-05	163	4.15927e-07	4.15482e-07
		0.9754	1153	1	1152	2	1154	0.0017331	0.00161421		1	164	3.411e-05	164	6.82201e-05	164	4.15976e-07	4.15482e-07
		0.9753	1154	1	1153	2	1155	0.0017316	0.00161421		1	165	3.43225e-05	165	6.8645e-05	165	4.1603e-07	4.15482e-07
		0.9749	1155	1	1154	2	1156	0.0017301	0.00161421		1	166	3.45354e-05	166	6.90708e-05	166	4.16089e-07	4.15482e-07
		0.9748	1156	1	1155	2	1157	0.00172861	0.00161421		1	167	3.47488e-05	167	6.94976e-05	167	4.16153e-07	4.15482e-07
		0.9745	1157	1	1156	2	1158	0.00172712	0.00161421		1	168	3.49627e-05	168	6.99255e-05	168	4.16223e-07	4.15482e-07
		0.9744	1159	1	1158	2	1160	0.00172414	0.00161421		1	169	3.51773e-05	169	7.03545e-05	169	4.16299e-07	4.15482e-07
		0.9742	1160	1	1159	2	1161	0.00172265	0.00161421		1	170	3.53924e-05	170	7.07849e-05	170	4.16382e-07	4.15482e-07
		0.974	1161	1	1160	2	1162	0.00172117	0.00161421		1	171	3.56083e-05	171	7.12166e-05	171	4.16472e-07	4.15482e-07
		0.9739	1162	1	1161	2	1163	0.00171969	0.00161421		1	172	3.58249e-05	172	7.16499e-05	172	4.16569e-07	4.15482e-07
		0.9738	1163	1	1162	2	1164	0.00171821	0.00161421		1	173	3.60424e-05	173	7.20847e-05	173	4.16675e-07	4.15482e-07
		0.9735	1165	1	1164	2	1166	0.00171527	0.00161421		1	174	3.62606e-05	174	7.25213e-05	174	4.16789e-07	4.15482e-07
		0.9732	1166	1	1165	2	1167	0.0017138	0.00161421		1	175	3.64799e-05	175	7.29597e-05	175	4.16913e-07	4.15482e-07
		0.973	1167	1	1166	2	1168	0.00171233	0.00161421		1	176	3.67001e-05	176	7.34002e-05	176	4.17046e-07	4.15482e-07
		0.9729	1168	1	1167	2	1169	0.00171086	0.00161421		1	177	3.69214e-05	177	7.38428e-05	177	4.17191e-07	4.15482e-07
		0.9728	1169	1	1168	2	1170	0.0017094	0.00161421		1	178	3.71438e-05	178	7.42877e-05	178	4.17346e-07	4.15482e-07
		0.9726	1170	1	1169	2	1171	0.00170794	0.00161421		1	179	3.73675e-05	179	7.47351e-05	179	4.17514e-07	4.15482e-07
		0.9721	1171	1	1170	2	1172	0.00170648	0.00161421		1	180	3.75925e-05	180	7.51851e-05	180	4.17695e-07	4.15482e-07
		0.9717	1172	1	1171	2	1173	0.00170503	0.00161421		1	181	3.7819e-05	181	7.5638e-05	181	4.17889e-07	4.15482e-07
		0.9716	1173	1	1172	2	1174	0.00170358	0.00161421		1	182	3.8047e-05	182	7.60939e-05	182	4.18098e-07	4.15482e-07
		0.9713	1174	1	1173	2	1175	0.00170213	0.00161421		1	183	3.82765e-05	183	7.65531e-05	183	4.18323e-07	4.15482e-07
		0.9712	1175	1	1174	2	1176	0.00170068	0.00161421		1	184	3.85079e-05	184	7.70157e-05	184	4.18564e-07	4.15482e-07
		0.9711	1176	1	1175	2	1177	0.00169924	0.00161421		1	185	3.8741e-05	185	7.74821e-05	185	4.18822e-07	4.15482e-07
		0.9709	1179	1	1178	2	1180	0.00169492	0.00161421		1	186	3.89762e-05	186	7.79524e-05	186	4.19099e-07	4.15482e-07
		0.9705	1180	1	1179	2	1181	0.00169348	0.00161421		1	187	3.92134e-05	187	7.84268e-05	187	4.19395e-07	4.15482e-07
		0.9702	1181	1	1180	2	1182	0.00169205	0.00161421		1	188	3.94529e-05	188	7.89058e-05	188	4.19712e-07	4.15482e-07
		0.97	1185	1	1184	2	1186	0.00168634	0.00161421		1	189	3.96948e-05	189	7.93895e-05	189	4.2005e-07	4.15482e-07
		0.9695	1188	1	1187	2	1189	0.00168209	0.00161421		1	190	3.99392e-05	190	7.98783e-05	190	4.20412e-07	4.15482e-07
		0.9692	1189	1	1188	2	1190	0.00168067	0.00161421		1	191	4.01862e-05	191	8.03725e-05	191	4.20798e-07	4.15482e-07
		0.9689	1190	1	1189	2	1191	0.00167926	0.00161421		1	192	4.04362e-05	192	8.08724e-05	192	4.2121e-07	4.15482e-07
		0.9687	1191	1	1190	2	1192	0.00167785	0.00161421		1	193	4.06891e-05	193	8.13783e-05	193	4.21649e-07	4.15482e-07
		0.9683	1192	1	1191	2	1193	0.00167645	0.00161421		1	194	4.09453e-05	194	8.18906e-05	194	4.22116e-07	4.15482e-07
		0.9679	1193	1	1192	2	1194	0.00167504	0.00161421		1	195	4.12049e-05	195	8.24097e-05	195	4.22614e-07	4.15482e-07
		0.9677	1195	1	1194	2	1196	0.00167224	0.00161421		0.9999	196	4.1468e-05	196	8.2936e-05	196	4.23143e-07	2.67673e-06
		0.9671	1196	1	1195	2	1197	0.00167084	0.00161421		0.9999	197	4.1735e-05	197	8.34699e-05	197	4.23705e-07	2.67673e-06
		0.9666	1197	1	1196	2	1198	0.00166945	0.00161421		0.9999	198	4.20059e-05	198	8.40118e-05	198	4.24302e-07	2.67673e-06
		0.9665	1204	1	1203	2	1205	0.00165975	0.00161421		0.9999	199	4.22811e-05	199	8.45623e-05	199	4.24936e-07	2.67673e-06
		0.9659	1206	1	1205	2	1207	0.001657	0.00161421		0.9999	200	4.25608e-05	200	8.51217e-05	200	4.25608e-07	2.67673e-06
		0.9656	1207	1	1206	2	1208	0.00165563	0.00161421		0.9999	201	4.28453e-05	201	8.56905e-05	201	4.26321e-07	2.67673e-06
		0.9653	1208	1	1207	2	1209	0.00165426	0.00161421		0.9999	202	4.31347e-05	202	8.62693e-05	202	4.27076e-07	2.67673e-06
		0.9651	1209	1	1208	2	1210	0.00165289	0.00161421		0.9999	203	4.34293e-05	203	8.68587e-05	203	4.27875e-07	2.67673e-06
		0.9647	1210	1	1209	2	1211	0.00165153	0.00161421		0.9999	204	4.37295e-05	204	8.7459e-05	204	4.28721e-07	2.67673e-06
		0.9646	1211	1	1210	2	1212	0.00165017	0.00161421		0.9999	205	4.40355e-05	205	8.80711e-05	205	4.29615e-07	2.67673e-06
		0.9645	1212	1	1211	2	1213	0.0016488	0.00161421		0.9999	206	4.43477e-05	206	8.86954e-05	206	4.3056e-07	2.67673e-06
		0.9641	1213	1	1212	2	1214	0.00164745	0.00161421		0.9999	207	4.46663e-05	207	8.93326e-05	207	4.31558e-07	2.67673e-06
		0.964	1214	1	1213	2	1215	0.00164609	0.00161421		0.9999	208	4.49916e-05	208	8.99833e-05	208	4.32612e-07	2.67673e-06
		0.9626	1215	1	1214	2	1216	0.00164474	0.00161421		0.9999	209	4.53241e-05	209	9.06482e-05	209	4.33724e-07	2.67673e-06
		0.9621	1216	1	1215	2	1217	0.00164339	0.00161421		0.9999	210	4.5664e-05	210	9.13281e-05	210	4.34896e-07	2.67673e-06
		0.9617	1217	1	1216	2	1218	0.00164204	0.00161421		0.9999	211	4.60118e-05	211	9.20236e-05	211	4.36131e-07	2.67673e-06
		0.9612	1218	1	1217	2	1219	0.00164069	0.00161421		0.9999	212	4.63678e-05	212	9.27355e-05	212	4.37432e-07	2.67673e-06
		0.9605	1219	1	1218	2	1220	0.00163934	0.00161421		0.9999	213	4.67323e-05	213	9.34647e-05	213	4.38801e-07	2.67673e-06
		0.9604	1220	1	1219	2	1221	0.001638	0.00161421		0.9999	214	4.71059e-05	214	9.42119e-05	214	4.40242e-07	2.67673e-06
		0.9597	1221	1	1220	2	1222	0.00163666	0.00161421		0.9999	215	4.74889e-05	215	9.49779e-05	215	4.41758e-07	2.67673e-06
		0.9593	1223	1	1222	2	1224	0.00163399	0.00161421		0.9999	216	4.78818e-05	216	9.57637e-05	216	4.4335e-07	2.67673e-06
		0.9592	1224	1	1223	2	1225	0.00163265	0.00161421		0.9999	217	4.82851e-05	217	9.65701e-05	217	4.45024e-07	2.67673e-06
		0.9589	1226	1	1225	2	1227	0.00162999	0.00161421		0.9999	218	4.86991e-05	218	9.73982e-05	218	4.46781e-07	2.67673e-06
		0.9588	1227	1	1226	2	1228	0.00162866	0.00161421		0.9999	219	4.91244e-05	219	9.82488e-05	219	4.48624e-07	2.67673e-06
		0.9583	1228	1	1227	2	1229	0.00162734	0.00161421		0.9999	220	4.95615e-05	220	9.91229e-05	220	4.50559e-07	2.67673e-06
		0.9581	1229	1	1228	2	1230	0.00162602	0.00161421		0.9999	221	5.00108e-05	221	0.000100022	221	4.52587e-07	2.67673e-06
		0.9575	1230	1	1229	2	1231	0.0016247	0.00161421		0.9999	222	5.04731e-05	222	0.000100946	222	4.54712e-07	2.67673e-06
		0.9573	1235	1	1234	2	1236	0.00161812	0.00161421		0.9999	223	5.09487e-05	223	0.000101897	223	4.56939e-07	2.67673e-06
		0.9565	1236	1	1235	2	1237	0.00161681	0.00161421		0.9999	224	5.14383e-05	224	0.000102877	224	4.5927e-07	2.67673e-06
		0.9557	1237	1	1236	2	1238	0.00161551	0.00161421		0.9999	225	5.19424e-05	225	0.000103885	225	4.6171e-07	2.67673e-06
		0.9551	1238	1	1237	2	1239	0.00161421	0.00161421		0.9999	226	5.24617e-05	226	0.000104923	226	4.64263e-07	2.67673e-06
		0.9547	1238	2	1236	4	1240	0.00322581	0.0032		0.9999	227	5.29967e-05	227	0.000105993	227	4.66932e-07	2.67673e-06
		0.9542	1239	2	1237	4	1241	0.00322321	0.0032		0.9999	228	5.35482e-05	228	0.000107096	228	4.69721e-07	2.67673e-06
		0.9532	1240	2	1238	4	1242	0.00322061	0.0032		0.9999	229	5.41168e-05	229	0.000108234	229	4.72636e-07	2.67673e-06
		0.9531	1241	2	1239	4	1243	0.00321802	0.0032		0.9999	230	5.47032e-05	230	0.000109406	230	4.7568e-07	2.67673e-06
		0.9527	1242	2	1240	4	1244	0.00321543	0.0032		0.9999	231	5.5308e-05	231	0.000110616	231	4.78857e-07	2.67673e-06
		0.9519	1243	2	1241	4	1245	0.00321285	0.0032		0.9999	232	5.5932e-05	232	0.000111864	232	4.82173e-07	2.67673e-06
		0.9514	1244	2	1242	4	1246	0.00321027	0.0032		0.9999	233	5.6576e-05	233	0.000113152	233	4.85631e-07	2.67673e-06
		0.9512	1245	2	1243	4	1247	0.0032077	0.0032		0.9999	234	5.72407e-05	234	0.000114481	234	4.89237e-07	2.67673e-06
		0.9511	1246	2	1244	4	1248	0.00320513	0.0032		0.9999	235	5.79269e-05	235	0.000115854	235	4.92995e-07	2.67673e-06
		0.9509	1247	2	1245	4	1249	0.00320256	0.0032		0.9999	236	5.86354e-05	236	0.000117271	236	4.9691e-07	2.67673e-06
		0.9503	1248	2	1246	4	1250	0.0032	0.0032		0.9999	237	5.9367e-05	237	0.000118734	237	5.00988e-07	2.67673e-06
		0.9502	1248	3	1245	6	1251	0.00479616	0.00475436		0.9999	238	6.01226e-05	238	0.000120245	238	5.05232e-07	2.67673e-06
		0.9496	1249	3	1246	6	1252	0.00479233	0.00475436		0.9999	239	6.09031e-05	239	0.000121806	239	5.0965e-07	2.67673e-06
		0.9495	1250	3	1247	6	1253	0.00478851	0.00475436		0.9999	240	6.17094e-05	240	0.000123419	240	5.14245e-07	2.67673e-06
		0.9493	1252	3	1249	6	1255	0.00478088	0.00475436		0.9999	241	6.25423e-05	241	0.000125085	241	5.19023e-07	2.67673e-06
		0.949	1253	3	1250	6	1256	0.00477707	0.00475436		0.9999	242	6.34029e-05	242	0.000126806	242	5.23991e-07	2.67673e-06
		0.9486	1254	3	1251	6	1257	0.00477327	0.00475436		0.9999	243	6.4292e-05	243	0.000128584	243	5.29152e-07	2.67673e-06
		0.9484	1256	3	1253	6	1259	0.00476569	0.00475436		0.9999	244	6.52108e-05	244	0.000130422	244	5.34514e-07	2.67673e-06
		0.9481	1257	3	1254	6	1260	0.0047619	0.00475436		0.9999	245	6.61601e-05	245	0.00013232	245	5.40083e-07	2.67673e-06
		0.9479	1258	3	1255	6	1261	0.00475813	0.00475436		0.9999	246	6.71411e-05	246	0.000134282	246	5.45863e-07	2.67673e-06
		0.9477	1259	3	1256	6	1262	0.00475436	0.00475436		0.9999	247	6.81548e-05	247	0.00013631	247	5.51861e-07	2.67673e-06
		0.9473	1259	4	1255	8	1263	0.00633413	0.0060698		0.9999	248	6.92023e-05	248	0.000138405	248	5.58083e-07	2.67673e-06
		0.9468	1260	4	1256	8	1264	0.00632911	0.0060698		0.9999	249	7.02847e-05	249	0.000140569	249	5.64536e-07	2.67673e-06
		0.9457	1262	4	1258	8	1266	0.00631912	0.0060698		0.9999	250	7.14032e-05	250	0.000142806	250	5.71226e-07	2.67673e-06
		0.9452	1263	4	1259	8	1267	0.00631413	0.0060698		0.9999	251	7.25589e-05	251	0.000145118	251	5.78159e-07	2.67673e-06
		0.9445	1264	4	1260	8	1268	0.00630915	0.0060698		0.9999	252	7.37531e-05	252	0.000147506	252	5.85342e-07	2.67673e-06
		0.9441	1265	4	1261	8	1269	0.00630418	0.0060698		0.9999	253	7.49869e-05	253	0.000149974	253	5.92781e-07	2.67673e-06
		0.9422	1266	4	1262	8	1270	0.00629921	0.0060698		0.9999	254	7.62615e-05	254	0.000152523	254	6.00485e-07	2.67673e-06
		0.9421	1267	4	1263	8	1271	0.00629426	0.0060698		0.9999	255	7.75784e-05	255	0.000155157	255	6.08458e-07	2.67673e-06
		0.942	1268	4	1264	8	1272	0.00628931	0.0060698		0.9999	256	7.89387e-05	256	0.000157877	256	6.16709e-07	2.67673e-06
		0.9419	1270	4	1266	8	1274	0.00627943	0.0060698		0.9999	257	8.03438e-05	257	0.000160688	257	6.25244e-07	2.67673e-06
		0.9412	1271	4	1267	8	1275	0.00627451	0.0060698		0.9999	258	8.17951e-05	258	0.00016359	258	6.34071e-07	2.67673e-06
		0.9407	1272	4	1268	8	1276	0.00626959	0.0060698		0.9999	259	8.32939e-05	259	0.000166588	259	6.43196e-07	2.67673e-06
		0.9396	1274	4	1270	8	1278	0.00625978	0.0060698		0.9999	260	8.48417e-05	260	0.000169683	260	6.52629e-07	2.67673e-06
		0.9391	1275	4	1271	8	1279	0.00625489	0.0060698		0.9999	261	8.64399e-05	261	0.00017288	261	6.62375e-07	2.67673e-06
		0.9387	1276	4	1272	8	1280	0.00625	0.0060698		0.9999	262	8.809e-05	262	0.00017618	262	6.72442e-07	2.67673e-06
		0.9384	1277	4	1273	8	1281	0.00624512	0.0060698		0.9999	263	8.97934e-05	263	0.000179587	263	6.82839e-07	2.67673e-06
		0.9383	1278	4	1274	8	1282	0.00624025	0.0060698		0.9999	264	9.15517e-05	264	0.000183103	264	6.93574e-07	2.67673e-06
		0.938	1279	4	1275	8	1283	0.00623539	0.0060698		0.9999	265	9.33665e-05	265	0.000186733	265	7.04653e-07	2.67673e-06
		0.9378	1280	4	1276	8	1284	0.00623053	0.0060698		0.9999	266	9.52393e-05	266	0.000190479	266	7.16085e-07	2.67673e-06
		0.937	1281	4	1277	8	1285	0.00622568	0.0060698		0.9999	267	9.71718e-05	267	0.000194344	267	7.27879e-07	2.67673e-06
		0.9368	1283	4	1279	8	1287	0.00621601	0.0060698		0.9999	268	9.91657e-05	268	0.000198331	268	7.40042e-07	2.67673e-06
		0.9359	1284	4	1280	8	1288	0.00621118	0.0060698		0.9999	269	0.000101222	269	0.000202445	269	7.52583e-07	2.67673e-06
		0.9347	1285	4	1281	8	1289	0.00620636	0.0060698		0.9999	270	0.000103344	270	0.000206688	270	7.65511e-07	2.67673e-06
		0.9342	1286	4	1282	8	1290	0.00620155	0.0060698		0.9999	271	0.000105532	271	0.000211064	271	7.78833e-07	2.67673e-06
		0.9333	1287	4	1283	8	1291	0.00619675	0.0060698		0.9999	272	0.000107788	272	0.000215576	272	7.92559e-07	2.67673e-06
		0.9332	1288	4	1284	8	1292	0.00619195	0.0060698		0.9999	273	0.000110114	273	0.000220228	273	8.06698e-07	2.67673e-06
		0.9322	1290	4	1286	8	1294	0.00618238	0.0060698		0.9999	274	0.000112512	274	0.000225024	274	8.21257e-07	2.67673e-06
		0.9317	1292	4	1288	8	1296	0.00617284	0.0060698		0.9999	275	0.000114984	275	0.000229968	275	8.36247e-07	2.67673e-06
		0.9314	1293	4	1289	8	1297	0.00616808	0.0060698		0.9999	276	0.000117531	276	0.000235062	276	8.51675e-07	2.67673e-06
		0.9306	1294	4	1290	8	1298	0.00616333	0.0060698		0.9999	277	0.000120156	277	0.000240312	277	8.67553e-07	2.67673e-06
		0.9304	1295	4	1291	8	1299	0.00615858	0.0060698		0.9999	278	0.00012286	278	0.000245721	278	8.83887e-07	2.67673e-06
		0.9293	1296	4	1292	8	1300	0.00615385	0.0060698		0.9999	279	0.000125646	279	0.000251292	279	9.00689e-07	2.67673e-06
		0.9291	1297	4	1293	8	1301	0.00614912	0.0060698		0.9999	280	0.000128515	280	0.000257031	280	9.17966e-07	2.67673e-06
		0.929	1299	4	1295	8	1303	0.00613968	0.0060698		0.9999	281	0.00013147	281	0.00026294	281	9.3573e-07	2.67673e-06
		0.9286	1300	4	1296	8	1304	0.00613497	0.0060698		0.9999	282	0.000134512	282	0.000269025	282	9.53989e-07	2.67673e-06
		0.9284	1301	4	1297	8	1305	0.00613027	0.0060698		0.9999	283	0.000137644	283	0.000275289	283	9.72753e-07	2.67673e-06
		0.9279	1302	4	1298	8	1306	0.00612557	0.0060698		0.9999	284	0.000140868	284	0.000281737	284	9.92032e-07	2.67673e-06
		0.9273	1303	4	1299	8	1307	0.00612089	0.0060698		0.9999	285	0.000144187	285	0.000288373	285	1.01184e-06	2.67673e-06
		0.9268	1304	4	1300	8	1308	0.00611621	0.0060698		0.9999	286	0.000147601	286	0.000295202	286	1.03217e-06	2.67673e-06
		0.9266	1305	4	1301	8	1309	0.00611154	0.0060698		0.9999	287	0.000151114	287	0.000302227	287	1.05306e-06	2.67673e-06
		0.9253	1306	4	1302	8	1310	0.00610687	0.0060698		0.9999	288	0.000154727	288	0.000309455	288	1.0745e-06	2.67673e-06
		0.9249	1307	4	1303	8	1311	0.00610221	0.0060698		0.9999	289	0.000158444	289	0.000316888	289	1.0965e-06	2.67673e-06
		0.9237	1308	4	1304	8	1312	0.00609756	0.0060698		0.9999	290	0.000162266	290	0.000324532	290	1.11908e-06	2.67673e-06
		0.9233	1309	4	1305	8	1313	0.00609292	0.0060698		0.9999	291	0.000166196	291	0.000332392	291	1.14224e-06	2.67673e-06
		0.9223	1310	4	1306	8	1314	0.00608828	0.0060698		0.9999	292	0.000170236	292	0.000340473	292	1.166e-06	2.67673e-06
		0.922	1311	4	1307	8	1315	0.00608365	0.0060698		0.9999	293	0.000174389	293	0.000348779	293	1.19037e-06	2.67673e-06
		0.9219	1312	4	1308	8	1316	0.00607903	0.0060698		0.9999	294	0.000178657	294	0.000357315	294	1.21536e-06	2.67673e-06
		0.9204	1313	4	1309	8	1317	0.00607441	0.0060698		0.9999	295	0.000183043	295	0.000366086	295	1.24097e-06	2.67673e-06
		0.9188	1314	4	1310	8	1318	0.0060698	0.0060698		0.9999	296	0.000187549	296	0.000375098	296	1.26722e-06	2.67673e-06
		0.9178	1315	5	1310	10	1320	0.00757576	0.00757002		0.9999	297	0.000192178	297	0.000384356	297	1.29413e-06	2.67673e-06
		0.9177	1316	5	1311	10	1321	0.00757002	0.00757002		0.9999	298	0.000196932	298	0.000393864	298	1.32169e-06	2.67673e-06
		0.9164	1317	6	1311	12	1323	0.00907029	0.00893522		0.9999	299	0.000201814	299	0.000403628	299	1.34993e-06	2.67673e-06
		0.9159	1318	6	1312	12	1324	0.00906344	0.00893522		0.9999	300	0.000206827	300	0.000413654	300	1.37885e-06	2.67673e-06
		0.9155	1319	6	1313	12	1325	0.0090566	0.00893522		0.9999	301	0.000211973	301	0.000423946	301	1.40846e-06	2.67673e-06
		0.9139	1320	6	1314	12	1326	0.00904977	0.00893522		0.9999	302	0.000217255	302	0.000434511	302	1.43878e-06	2.67673e-06
		0.9128	1321	6	1315	12	1327	0.00904295	0.00893522		0.9999	303	0.000222677	303	0.000445353	303	1.46981e-06	2.67673e-06
		0.912	1322	6	1316	12	1328	0.00903614	0.00893522		0.9999	304	0.00022824	304	0.000456479	304	1.50158e-06	2.67673e-06
		0.9115	1323	6	1317	12	1329	0.00902935	0.00893522		0.9999	305	0.000233947	305	0.000467894	305	1.53408e-06	2.67673e-06
		0.9094	1324	6	1318	12	1330	0.00902256	0.00893522		0.9999	306	0.000239802	306	0.000479604	306	1.56733e-06	2.67673e-06
		0.9089	1326	6	1320	12	1332	0.00900901	0.00893522		0.9999	307	0.000245807	307	0.000491615	307	1.60135e-06	2.67673e-06
		0.9086	1327	6	1321	12	1333	0.00900225	0.00893522		0.9999	308	0.000251966	307.999	0.000503932	308	1.63614e-06	2.67673e-06
		0.9079	1328	6	1322	12	1334	0.0089955	0.00893522		0.9999	309	0.000258281	308.999	0.000516562	309	1.67172e-06	2.67673e-06
		0.9077	1331	6	1325	12	1337	0.00897532	0.00893522		0.9999	310	0.000264755	309.999	0.00052951	310	1.7081e-06	2.67673e-06
		0.9068	1332	6	1326	12	1338	0.00896861	0.00893522		0.9999	311	0.000271391	310.999	0.000542783	311	1.74528e-06	2.67673e-06
		0.9058	1333	6	1327	12	1339	0.00896191	0.00893522		0.9999	312	0.000278193	311.999	0.000556386	312	1.78329e-06	2.67673e-06
		0.9049	1334	6	1328	12	1340	0.00895522	0.00893522		0.9999	313	0.000285163	312.999	0.000570327	313	1.82213e-06	2.67673e-06
		0.9038	1335	6	1329	12	1341	0.00894855	0.00893522		0.9999	314	0.000292305	313.999	0.000584611	314	1.86182e-06	2.67673e-06
		0.9036	1336	6	1330	12	1342	0.00894188	0.00893522		0.9999	315	0.000299622	314.999	0.000599244	315	1.90236e-06	2.67673e-06
		0.9024	1337	6	1331	12	1343	0.00893522	0.00893522		0.9998	316	0.000307117	315.999	0.000614233	316	1.94378e-06	1.78697e-05
		0.9019	1337	7	1330	14	1344	0.0104167	0.0102489		0.9998	317	0.000314792	316.999	0.000629585	317	1.98607e-06	1.78697e-05
		0.8997	1338	7	1331	14	1345	0.0104089	0.0102489		0.9998	318	0.000322653	317.999	0.000645306	318	2.02926e-06	1.78697e-05
		0.8992	1339	7	1332	14	1346	0.0104012	0.0102489		0.9998	319	0.000330701	318.999	0.000661402	319	2.07336e-06	1.78697e-05
		0.8991	1340	7	1333	14	1347	0.0103935	0.0102489		0.9998	320	0.00033894	319.999	0.000677881	320	2.11838e-06	1.78697e-05
		0.8973	1341	7	1334	14	1348	0.0103858	0.0102489		0.9998	321	0.000347374	320.999	0.000694748	321	2.16432e-06	1.78697e-05
		0.8971	1342	7	1335	14	1349	0.0103781	0.0102489		0.9998	322	0.000356006	321.999	0.000712012	322	2.21122e-06	1.78697e-05
		0.8954	1343	7	1336	14	1350	0.0103704	0.0102489		0.9998	323	0.000364839	322.999	0.000729678	323	2.25906e-06	1.78697e-05
		0.8951	1344	7	1337	14	1351	0.0103627	0.0102489		0.9998	324	0.000373877	323.999	0.000747753	324	2.30788e-06	1.78697e-05
		0.8939	1345	7	1338	14	1352	0.010355	0.0102489		0.9998	325	0.000383123	324.999	0.000766245	325	2.35768e-06	1.78697e-05
		0.892	1347	7	1340	14	1354	0.0103397	0.0102489		0.9998	326	0.000392581	325.999	0.000785161	326	2.40847e-06	1.78697e-05
		0.8918	1348	7	1341	14	1355	0.0103321	0.0102489		0.9998	327	0.000402254	326.999	0.000804508	327	2.46027e-06	1.78697e-05
		0.8888	1349	7	1342	14	1356	0.0103245	0.0102489		0.9998	328	0.000412146	327.999	0.000824292	328	2.51309e-06	1.78697e-05
		0.8874	1350	7	1343	14	1357	0.0103169	0.0102489		0.9998	329	0.000422261	328.999	0.000844522	329	2.56694e-06	1.78697e-05
		0.8866	1351	7	1344	14	1358	0.0103093	0.0102489		0.9998	330	0.000432602	329.999	0.000865205	330	2.62183e-06	1.78697e-05
		0.8864	1353	7	1346	14	1360	0.0102941	0.0102489		0.9998	331	0.000443173	330.999	0.000886347	331	2.67778e-06	1.78697e-05
		0.8863	1354	7	1347	14	1361	0.0102866	0.0102489		0.9997	332	0.000453978	331.999	0.000907956	332	2.73481e-06	3.35736e-05
		0.8853	1355	7	1348	14	1362	0.010279	0.0102489		0.9997	333	0.00046502	332.999	0.000930041	333	2.79291e-06	3.35736e-05
		0.8846	1356	7	1349	14	1363	0.0102715	0.0102489		0.9997	334	0.000476304	333.999	0.000952607	334	2.85212e-06	3.35736e-05
		0.8843	1357	7	1350	14	1364	0.0102639	0.0102489		0.9997	335	0.000487832	334.999	0.000975664	335	2.91243e-06	3.35736e-05
		0.884	1358	7	1351	14	1365	0.0102564	0.0102489		0.9997	336	0.000499609	335.999	0.000999219	336	2.97387e-06	3.35736e-05
		0.8816	1359	7	1352	14	1366	0.0102489	0.0102489		0.9997	336.999	0.000511639	336.999	0.00102328	337	3.03644e-06	3.35736e-05
		0.8811	1359	8	1351	16	1367	0.0117045	0.0115523		0.9997	337.999	0.000523926	337.999	0.00104785	338	3.10015e-06	3.35736e-05
		0.8797	1360	8	1352	16	1368	0.0116959	0.0115523		0.9997	338.999	0.000536473	338.999	0.00107295	339	3.16503e-06	3.35736e-05
		0.8778	1362	8	1354	16	1370	0.0116788	0.0115523		0.9997	339.999	0.000549285	339.999	0.00109857	340	3.23109e-06	3.35736e-05
		0.8766	1363	8	1355	16	1371	0.0116703	0.0115523		0.9997	340.999	0.000562365	340.999	0.00112473	341	3.29833e-06	3.35736e-05
		0.875	1364	8	1356	16	1372	0.0116618	0.0115523		0.9997	341.999	0.000575718	341.999	0.00115144	342	3.36677e-06	3.35736e-05
		0.8701	1365	8	1357	16	1373	0.0116533	0.0115523		0.9997	342.999	0.000589348	342.999	0.0011787	343	3.43643e-06	3.35736e-05
		0.8683	1366	8	1358	16	1374	0.0116448	0.0115523		0.9997	343.999	0.000603258	343.999	0.00120652	344	3.50732e-06	3.35736e-05
		0.8682	1367	8	1359	16	1375	0.0116364	0.0115523		0.9997	344.999	0.000617453	344.999	0.00123491	345	3.57944e-06	3.35736e-05
		0.8675	1369	8	1361	16	1377	0.0116195	0.0115523		0.9997	345.999	0.000631938	345.999	0.00126388	346	3.65282e-06	3.35736e-05
		0.8662	1370	8	1362	16	1378	0.011611	0.0115523		0.9997	346.999	0.000646715	346.999	0.00129343	347	3.72746e-06	3.35736e-05
		0.8646	1372	8	1364	16	1380	0.0115942	0.0115523		0.9997	347.999	0.00066179	347.999	0.00132358	348	3.80339e-06	3.35736e-05
		0.8637	1373	8	1365	16	1381	0.0115858	0.0115523		0.9997	348.999	0.000677166	348.999	0.00135433	349	3.88061e-06	3.35736e-05
		0.8634	1374	8	1366	16	1382	0.0115774	0.0115523		0.9997	349.999	0.000692848	349.999	0.0013857	350	3.95913e-06	3.35736e-05
		0.8629	1375	8	1367	16	1383	0.0115691	0.0115523		0.9997	350.999	0.000708841	350.999	0.00141768	351	4.03898e-06	3.35736e-05
		0.8624	1376	8	1368	16	1384	0.0115607	0.0115523		0.9997	351.999	0.000725148	351.999	0.0014503	352	4.12016e-06	3.35736e-05
		0.8617	1377	8	1369	16	1385	0.0115523	0.0115523		0.9997	352.999	0.000741774	352.999	0.00148355	353	4.20268e-06	3.35736e-05
		0.8606	1377	9	1368	18	1386	0.012987	0.0127932		0.9997	353.999	0.000758723	353.998	0.00151745	354	4.28657e-06	3.35736e-05
		0.8597	1378	9	1369	18	1387	0.0129776	0.0127932		0.9997	354.999	0.000776	354.998	0.001552	355	4.37183e-06	3.35736e-05
		0.8587	1379	9	1370	18	1388	0.0129683	0.0127932		0.9997	355.999	0.000793609	355.998	0.00158722	356	4.45848e-06	3.35736e-05
		0.8567	1380	9	1371	18	1389	0.012959	0.0127932		0.9997	356.999	0.000811554	356.998	0.00162311	357	4.54652e-06	3.35736e-05
		0.8549	1381	9	1372	18	1390	0.0129496	0.0127932		0.9997	357.999	0.000829841	357.998	0.00165968	358	4.63598e-06	3.35736e-05
		0.8545	1382	9	1373	18	1391	0.0129403	0.0127932		0.9997	358.999	0.000848473	358.998	0.00169695	359	4.72687e-06	3.35736e-05
		0.8543	1383	9	1374	18	1392	0.012931	0.0127932		0.9997	359.999	0.000867455	359.998	0.00173491	360	4.8192e-06	3.35736e-05
		0.8519	1384	9	1375	18	1393	0.0129218	0.0127932		0.9997	360.999	0.000886792	360.998	0.00177358	361	4.91298e-06	3.35736e-05
		0.849	1385	9	1376	18	1394	0.0129125	0.0127932		0.9997	361.999	0.000906489	361.998	0.00181298	362	5.00823e-06	3.35736e-05
		0.8483	1388	9	1379	18	1397	0.0128848	0.0127932		0.9997	362.999	0.000926549	362.998	0.0018531	363	5.10495e-06	3.35736e-05
		0.8459	1389	9	1380	18	1398	0.0128755	0.0127932		0.9997	363.999	0.000946978	363.998	0.00189396	364	5.20318e-06	3.35736e-05
		0.8457	1390	9	1381	18	1399	0.0128663	0.0127932		0.9997	364.999	0.000967781	364.998	0.00193556	365	5.30291e-06	3.35736e-05
		0.8436	1391	9	1382	18	1400	0.0128571	0.0127932		0.9997	365.999	0.000988961	365.998	0.00197792	366	5.40416e-06	3.35736e-05
		0.843	1394	9	1385	18	1403	0.0128297	0.0127932		0.9997	366.999	0.00101052	366.998	0.00202105	367	5.50694e-06	3.35736e-05
		0.8429	1395	9	1386	18	1404	0.0128205	0.0127932		0.9997	367.999	0.00103248	367.998	0.00206495	368	5.61128e-06	3.35736e-05
		0.8428	1396	9	1387	18	1405	0.0128114	0.0127932		0.9997	368.999	0.00105482	368.998	0.00210964	369	5.71717e-06	3.35736e-05
		0.8421	1397	9	1388	18	1406	0.0128023	0.0127932		0.9997	369.999	0.00107756	369.998	0.00215512	370	5.82464e-06	3.35736e-05
		0.8417	1398	9	1389	18	1407	0.0127932	0.0127932		0.9997	370.999	0.0011007	370.998	0.0022014	371	5.9337e-06	3.35736e-05
		0.8401	1398	10	1388	20	1408	0.0142045	0.0140845		0.9997	371.999	0.00112425	371.998	0.0022485	372	6.04436e-06	3.35736e-05
		0.8398	1400	10	1390	20	1410	0.0141844	0.0140845		0.9997	372.999	0.00114821	372.998	0.00229642	373	6.15663e-06	3.35736e-05
		0.8368	1401	10	1391	20	1411	0.0141743	0.0140845		0.9997	373.999	0.00117259	373.998	0.00234518	374	6.27053e-06	3.35736e-05
		0.8366	1402	10	1392	20	1412	0.0141643	0.0140845		0.9997	374.999	0.00119739	374.998	0.00239478	375	6.38607e-06	3.35736e-05
		0.8331	1403	10	1393	20	1413	0.0141543	0.0140845		0.9996	375.999	0.00122261	375.998	0.00244523	376	6.50327e-06	6.60118e-05
		0.8326	1404	10	1394	20	1414	0.0141443	0.0140845		0.9996	376.999	0.00124827	376.998	0.00249655	377	6.62214e-06	6.60118e-05
		0.8306	1405	10	1395	20	1415	0.0141343	0.0140845		0.9996	377.999	0.00127437	377.997	0.00254873	378	6.74268e-06	6.60118e-05
		0.8305	1406	10	1396	20	1416	0.0141243	0.0140845		0.9996	378.999	0.0013009	378.997	0.00260181	379	6.86492e-06	6.60118e-05
		0.8301	1407	10	1397	20	1417	0.0141143	0.0140845		0.9996	379.999	0.00132789	379.997	0.00265577	380	6.98887e-06	6.60118e-05
		0.8258	1408	10	1398	20	1418	0.0141044	0.0140845		0.9996	380.999	0.00135532	380.997	0.00271064	381	7.11455e-06	6.60118e-05
		0.8246	1409	10	1399	20	1419	0.0140944	0.0140845		0.9996	381.999	0.00138321	381.997	0.00276643	382	7.24195e-06	6.60118e-05
		0.8242	1410	10	1400	20	1420	0.0140845	0.0140845		0.9996	382.999	0.00141157	382.997	0.00282313	383	7.37111e-06	6.60118e-05
		0.8231	1410	11	1399	22	1421	0.0154821	0.0153631		0.9996	383.999	0.00144039	383.997	0.00288078	384	7.50202e-06	6.60118e-05
		0.823	1411	11	1400	22	1422	0.0154712	0.0153631		0.9996	384.999	0.00146968	384.997	0.00293937	385	7.63471e-06	6.60118e-05
		0.8229	1412	11	1401	22	1423	0.0154603	0.0153631		0.9996	385.999	0.00149945	385.997	0.00299891	386	7.76919e-06	6.60118e-05
		0.8226	1413	11	1402	22	1424	0.0154494	0.0153631		0.9996	386.998	0.00152971	386.997	0.00305942	387	7.90547e-06	6.60118e-05
		0.8217	1414	11	1403	22	1425	0.0154386	0.0153631		0.9996	387.998	0.00156045	387.997	0.0031209	388	8.04357e-06	6.60118e-05
		0.8199	1415	11	1404	22	1426	0.0154278	0.0153631		0.9996	388.998	0.00159169	388.997	0.00318338	389	8.18349e-06	6.60118e-05
		0.8191	1418	11	1407	22	1429	0.0153954	0.0153631		0.9996	389.998	0.00162342	389.997	0.00324685	390	8.32525e-06	6.60118e-05
		0.8177	1419	11	1408	22	1430	0.0153846	0.0153631		0.9996	390.998	0.00165566	390.997	0.00331133	391	8.46887e-06	6.60118e-05
		0.8164	1421	11	1410	22	1432	0.0153631	0.0153631		0.9996	391.998	0.00168841	391.997	0.00337683	392	8.61435e-06	6.60118e-05
		0.8151	1421	12	1409	24	1433	0.0167481	0.0166898		0.9996	392.998	0.00172168	392.997	0.00344336	393	8.76172e-06	6.60118e-05
		0.8143	1423	12	1411	24	1435	0.0167247	0.0166898		0.9996	393.998	0.00175546	393.996	0.00351092	394	8.91098e-06	6.60118e-05
		0.8133	1424	12	1412	24	1436	0.0167131	0.0166898		0.9996	394.998	0.00178977	394.996	0.00357955	395	9.06214e-06	6.60118e-05
		0.8113	1426	12	1414	24	1438	0.0166898	0.0166898		0.9996	395.998	0.00182461	395.996	0.00364923	396	9.21522e-06	6.60118e-05
		0.8109	1427	13	1414	26	1440	0.0180556	0.0178082		0.9996	396.998	0.00185999	396.996	0.00371999	397	9.37024e-06	6.60118e-05
		0.8074	1428	13	1415	26	1441	0.018043	0.0178082		0.9996	397.998	0.00189591	397.996	0.00379183	398	9.5272e-06	6.60118e-05
		0.8056	1430	13	1417	26	1443	0.018018	0.0178082		0.9996	398.998	0.00193238	398.996	0.00386476	399	9.68612e-06	6.60118e-05
		0.8052	1431	13	1418	26	1444	0.0180055	0.0178082		0.9996	399.998	0.0019694	399.996	0.00393881	400	9.84702e-06	6.60118e-05
		0.8037	1432	13	1419	26	1445	0.0179931	0.0178082		0.9996	400.998	0.00200698	400.996	0.00401397	401	1.00099e-05	6.60118e-05
		0.8019	1433	13	1420	26	1446	0.0179806	0.0178082		0.9996	401.998	0.00204513	401.996	0.00409026	402	1.01748e-05	6.60118e-05
		0.7995	1434	13	1421	26	1447	0.0179682	0.0178082		0.9996	402.998	0.00208384	402.996	0.00416769	403	1.03417e-05	6.60118e-05
		0.7968	1435	13	1422	26	1448	0.0179558	0.0178082		0.9996	403.998	0.00212313	403.996	0.00424627	404	1.05106e-05	6.60118e-05
		0.7954	1436	13	1423	26	1449	0.0179434	0.0178082		0.9996	404.998	0.00216301	404.996	0.00432601	405	1.06815e-05	6.60118e-05
		0.7943	1437	13	1424	26	1450	0.017931	0.0178082		0.9996	405.998	0.00220346	405.996	0.00440693	406	1.08545e-05	6.60118e-05
		0.7937	1438	13	1425	26	1451	0.0179187	0.0178082		0.9996	406.998	0.00224452	406.996	0.00448903	407	1.10296e-05	6.60118e-05
		0.7899	1439	13	1426	26	1452	0.0179063	0.0178082		0.9996	407.998	0.00228617	407.995	0.00457233	408	1.12067e-05	6.60118e-05
		0.7894	1440	13	1427	26	1453	0.017894	0.0178082		0.9996	408.998	0.00232842	408.995	0.00465684	409	1.13859e-05	6.60118e-05
		0.7872	1441	13	1428	26	1454	0.0178817	0.0178082		0.9995	409.998	0.00237128	409.995	0.00474257	410	1.15672e-05	9.00866e-05
		0.7869	1442	13	1429	26	1455	0.0178694	0.0178082		0.9995	410.998	0.00241476	410.995	0.00482952	411	1.17507e-05	9.00866e-05
		0.7853	1443	13	1430	26	1456	0.0178571	0.0178082		0.9995	411.998	0.00245886	411.995	0.00491773	412	1.19362e-05	9.00866e-05
		0.7851	1444	13	1431	26	1457	0.0178449	0.0178082		0.9995	412.997	0.00250359	412.995	0.00500718	413	1.21239e-05	9.00866e-05
		0.7843	1445	13	1432	26	1458	0.0178326	0.0178082		0.9995	413.997	0.00254895	413.995	0.0050979	414	1.23138e-05	9.00866e-05
		0.7833	1446	13	1433	26	1459	0.0178204	0.0178082		0.9995	414.997	0.00259495	414.995	0.0051899	415	1.25058e-05	9.00866e-05
		0.7819	1447	13	1434	26	1460	0.0178082	0.0178082		0.9995	415.997	0.0026416	415.995	0.00528319	416	1.27e-05	9.00866e-05
		0.7812	1447	14	1433	28	1461	0.019165	0.0190217		0.9995	416.997	0.00268889	416.995	0.00537778	417	1.28964e-05	9.00866e-05
		0.7806	1448	14	1434	28	1462	0.0191518	0.0190217		0.9994	417.997	0.00273684	417.995	0.00547368	418	1.30949e-05	0.000153148
		0.7797	1449	14	1435	28	1463	0.0191388	0.0190217		0.9994	418.997	0.00278546	418.994	0.00557091	419	1.32957e-05	0.000153148
		0.7785	1450	14	1436	28	1464	0.0191257	0.0190217		0.9994	419.997	0.00283474	419.994	0.00566948	420	1.34988e-05	0.000153148
		0.7741	1452	14	1438	28	1466	0.0190996	0.0190217		0.9994	420.997	0.0028847	420.994	0.00576939	421	1.3704e-05	0.000153148
		0.772	1453	14	1439	28	1467	0.0190866	0.0190217		0.9994	421.997	0.00293533	421.994	0.00587067	422	1.39115e-05	0.000153148
		0.7702	1455	14	1441	28	1469	0.0190606	0.0190217		0.9994	422.997	0.00298666	422.994	0.00597331	423	1.41213e-05	0.000153148
		0.7657	1456	14	1442	28	1470	0.0190476	0.0190217		0.9994	423.997	0.00303867	423.994	0.00607734	424	1.43334e-05	0.000153148
		0.7652	1457	14	1443	28	1471	0.0190347	0.0190217		0.9994	424.997	0.00309139	424.994	0.00618277	425	1.45477e-05	0.000153148
		0.7618	1458	14	1444	28	1472	0.0190217	0.0190217		0.9994	425.997	0.00314481	425.994	0.00628961	426	1.47643e-05	0.000153148
		0.7609	1458	15	1443	30	1473	0.0203666	0.0202566		0.9994	426.997	0.00319894	426.994	0.00639787	427	1.49833e-05	0.000153148
		0.758	1459	15	1444	30	1474	0.0203528	0.0202566		0.9994	427.997	0.00325378	427.993	0.00650756	428	1.52046e-05	0.000153148
		0.7507	1460	15	1445	30	1475	0.020339	0.0202566		0.9994	428.997	0.00330935	428.993	0.0066187	429	1.54282e-05	0.000153148
		0.7497	1461	15	1446	30	1476	0.0203252	0.0202566		0.9994	429.997	0.00336565	429.993	0.0067313	430	1.56542e-05	0.000153148
		0.7492	1462	15	1447	30	1477	0.0203114	0.0202566		0.9994	430.997	0.00342268	430.993	0.00684537	431	1.58825e-05	0.000153148
		0.7455	1463	15	1448	30	1478	0.0202977	0.0202566		0.9994	431.997	0.00348046	431.993	0.00696092	432	1.61132e-05	0.000153148
		0.7453	1464	15	1449	30	1479	0.020284	0.0202566		0.9994	432.996	0.00353898	432.993	0.00707796	433	1.63463e-05	0.000153148
		0.7443	1466	15	1451	30	1481	0.0202566	0.0202566		0.9994	433.996	0.00359826	433.993	0.00719651	434	1.65818e-05	0.000153148
		0.742	1466	16	1450	32	1482	0.0215924	0.0215054		0.9994	434.996	0.00365829	434.993	0.00731659	435	1.68197e-05	0.000153148
		0.7412	1467	16	1451	32	1483	0.0215779	0.0215054		0.9994	435.996	0.0037191	435.993	0.00743819	436	1.70601e-05	0.000153148
		0.7402	1468	16	1452	32	1484	0.0215633	0.0215054		0.9994	436.996	0.00378067	436.992	0.00756134	437	1.73028e-05	0.000153148
		0.7397	1469	16	1453	32	1485	0.0215488	0.0215054		0.9994	437.996	0.00384302	437.992	0.00768605	438	1.75481e-05	0.000153148
		0.7384	1470	16	1454	32	1486	0.0215343	0.0215054		0.9994	438.996	0.00390616	438.992	0.00781233	439	1.77957e-05	0.000153148
		0.7382	1471	16	1455	32	1487	0.0215198	0.0215054		0.9994	439.996	0.00397009	439.992	0.00794019	440	1.80459e-05	0.000153148
		0.7352	1472	16	1456	32	1488	0.0215054	0.0215054		0.9994	440.996	0.00403482	440.992	0.00806964	441	1.82985e-05	0.000153148
		0.7306	1472	17	1455	34	1489	0.0228341	0.0227729		0.9994	441.996	0.00410035	441.992	0.00820071	442	1.85536e-05	0.000153148
		0.7282	1473	17	1456	34	1490	0.0228188	0.0227729		0.9994	442.996	0.0041667	442.992	0.00833339	443	1.88113e-05	0.000153148
		0.7259	1474	17	1457	34	1491	0.0228035	0.0227729		0.9994	443.996	0.00423386	443.992	0.00846771	444	1.90714e-05	0.000153148
		0.7237	1475	17	1458	34	1492	0.0227882	0.0227729		0.9994	444.996	0.00430184	444.991	0.00860368	445	1.93341e-05	0.000153148
		0.7212	1476	17	1459	34	1493	0.0227729	0.0227729		0.9994	445.996	0.00437065	445.991	0.00874131	446	1.95993e-05	0.000153148
		0.7187	1476	18	1458	36	1494	0.0240964	0.0240964		0.9994	446.996	0.0044403	446.991	0.00888061	447	1.98671e-05	0.000153148
		0.7185	1476	19	1457	38	1495	0.0254181	0.0253672		0.9994	447.995	0.0045108	447.991	0.00902159	448	2.01375e-05	0.000153148
		0.7159	1477	19	1458	38	1496	0.0254011	0.0253672		0.9994	448.995	0.00458214	448.991	0.00916427	449	2.04104e-05	0.000153148
		0.7147	1478	19	1459	38	1497	0.0253841	0.0253672		0.9994	449.995	0.00465433	449.991	0.00930867	450	2.06859e-05	0.000153148
		0.7116	1479	19	1460	38	1498	0.0253672	0.0253672		0.9994	450.995	0.00472739	450.991	0.00945479	451	2.09641e-05	0.000153148
		0.7082	1479	20	1459	40	1499	0.0266845	0.0266134		0.9994	451.995	0.00480132	451.99	0.00960264	452	2.12448e-05	0.000153148
		0.7055	1480	20	1460	40	1500	0.0266667	0.0266134		0.9994	452.995	0.00487613	452.99	0.00975225	453	2.15282e-05	0.000153148
		0.7049	1481	20	1461	40	1501	0.0266489	0.0266134		0.9994	453.995	0.00495181	453.99	0.00990362	454	2.18141e-05	0.000153148
		0.7039	1482	20	1462	40	1502	0.0266312	0.0266134		0.9994	454.995	0.00502839	454.99	0.0100568	455	2.21028e-05	0.000153148
		0.7011	1483	20	1463	40	1503	0.0266134	0.0266134		0.9994	455.995	0.00510586	455.99	0.0102117	456	2.23941e-05	0.000153148
		0.701	1483	21	1462	42	1504	0.0279255	0.027833		0.9994	456.995	0.00518423	456.99	0.0103685	457	2.26881e-05	0.000153148
		0.6969	1484	21	1463	42	1505	0.027907	0.027833		0.9994	457.995	0.00526351	457.989	0.010527	458	2.29848e-05	0.000153148
		0.6962	1485	21	1464	42	1506	0.0278884	0.027833		0.9994	458.995	0.0053437	458.989	0.0106874	459	2.32841e-05	0.000153148
		0.6961	1486	21	1465	42	1507	0.0278699	0.027833		0.9994	459.995	0.00542482	459.989	0.0108496	460	2.35862e-05	0.000153148
		0.692	1487	21	1466	42	1508	0.0278515	0.027833		0.9994	460.994	0.00550687	460.989	0.0110137	461	2.3891e-05	0.000153148
		0.6919	1488	21	1467	42	1509	0.027833	0.027833		0.9994	461.994	0.00558985	461.989	0.0111797	462	2.41985e-05	0.000153148
		0.691	1488	22	1466	44	1510	0.0291391	0.0289474		0.9994	462.994	0.00567377	462.989	0.0113475	463	2.45087e-05	0.000153148
		0.6882	1489	22	1467	44	1511	0.0291198	0.0289474		0.9994	463.994	0.00575864	463.988	0.0115173	464	2.48217e-05	0.000153148
		0.6872	1490	22	1468	44	1512	0.0291005	0.0289474		0.9994	464.994	0.00584447	464.988	0.0116889	465	2.51375e-05	0.000153148
		0.6866	1491	22	1469	44	1513	0.0290813	0.0289474		0.9994	465.994	0.00593126	465.988	0.0118625	466	2.54561e-05	0.000153148
		0.6841	1494	22	1472	44	1516	0.0290237	0.0289474		0.9994	466.994	0.00601902	466.988	0.012038	467	2.57774e-05	0.000153148
		0.6817	1496	22	1474	44	1518	0.0289855	0.0289474		0.9994	467.994	0.00610776	467.988	0.0122155	468	2.61015e-05	0.000153148
		0.6812	1497	22	1475	44	1519	0.0289664	0.0289474		0.9994	468.994	0.00619748	468.988	0.012395	469	2.64285e-05	0.000153148
		0.6775	1498	22	1476	44	1520	0.0289474	0.0289474		0.9994	469.994	0.00628819	469.987	0.0125764	470	2.67582e-05	0.000153148
		0.6766	1498	24	1474	48	1522	0.0315375	0.0315375		0.9994	470.994	0.00637989	470.987	0.0127598	471	2.70908e-05	0.000153148
		0.6723	1498	25	1473	50	1523	0.0328299	0.0327225		0.9994	471.994	0.0064726	471.987	0.0129452	472	2.74263e-05	0.000153148
		0.6672	1499	25	1474	50	1524	0.0328084	0.0327225		0.9994	472.993	0.00656632	472.987	0.0131326	473	2.77646e-05	0.000153148
		0.6662	1500	25	1475	50	1525	0.0327869	0.0327225		0.9994	473.993	0.00666106	473.987	0.0133221	474	2.81058e-05	0.000153148
		0.6635	1501	25	1476	50	1526	0.0327654	0.0327225		0.9994	474.993	0.00675683	474.986	0.0135137	475	2.84498e-05	0.000153148
		0.6623	1502	25	1477	50	1527	0.0327439	0.0327225		0.9994	475.993	0.00685362	475.986	0.0137072	476	2.87967e-05	0.000153148
		0.6615	1503	25	1478	50	1528	0.0327225	0.0327225		0.9994	476.993	0.00695145	476.986	0.0139029	477	2.91466e-05	0.000153148
		0.6613	1503	26	1477	52	1529	0.0340092	0.0339869		0.9994	477.993	0.00705033	477.986	0.0141007	478	2.94993e-05	0.000153148
		0.6609	1504	26	1478	52	1530	0.0339869	0.0339869		0.9994	478.993	0.00715026	478.986	0.0143005	479	2.9855e-05	0.000153148
		0.6586	1504	27	1477	54	1531	0.0352711	0.035248		0.9994	479.993	0.00725126	479.985	0.0145025	480	3.02136e-05	0.000153148
		0.658	1505	27	1478	54	1532	0.035248	0.035248		0.9994	480.993	0.00735331	480.985	0.0147066	481	3.05751e-05	0.000153148
		0.6573	1505	28	1477	56	1533	0.0365297	0.0365297		0.9994	481.993	0.00745645	481.985	0.0149129	482	3.09396e-05	0.000153148
		0.6558	1505	29	1476	58	1534	0.0378096	0.0375162		0.9994	482.992	0.00756066	482.985	0.0151213	483	3.13071e-05	0.000153148
		0.6556	1506	29	1477	58	1535	0.037785	0.0375162		0.9994	483.992	0.00766596	483.985	0.0153319	484	3.16775e-05	0.000153148
		0.6523	1508	29	1479	58	1537	0.0377358	0.0375162		0.9994	484.992	0.00777236	484.984	0.0155447	485	3.2051e-05	0.000153148
		0.6469	1509	29	1480	58	1538	0.0377113	0.0375162		0.9994	485.992	0.00787986	485.984	0.0157597	486	3.24274e-05	0.000153148
		0.6452	1510	29	1481	58	1539	0.0376868	0.0375162		0.9994	486.992	0.00798847	486.984	0.0159769	487	3.28069e-05	0.000153148
		0.6449	1511	29	1482	58	1540	0.0376623	0.0375162		0.9994	487.992	0.0080982	487.984	0.0161964	488	3.31893e-05	0.000153148
		0.6422	1513	29	1484	58	1542	0.0376135	0.0375162		0.9994	488.992	0.00820905	488.984	0.0164181	489	3.35749e-05	0.000153148
		0.6395	1514	29	1485	58	1543	0.0375891	0.0375162		0.9994	489.992	0.00832104	489.983	0.0166421	490	3.39634e-05	0.000153148
		0.6355	1515	29	1486	58	1544	0.0375648	0.0375162		0.9994	490.992	0.00843416	490.983	0.0168683	491	3.4355e-05	0.000153148
		0.6348	1517	29	1488	58	1546	0.0375162	0.0375162		0.9994	491.991	0.00854843	491.983	0.0170969	492	3.47497e-05	0.000153148
		0.6341	1517	30	1487	60	1547	0.0387847	0.0385852		0.9993	492.991	0.00866385	492.983	0.0173277	493	3.51475e-05	0.000293438
		0.6309	1518	30	1488	60	1548	0.0387597	0.0385852		0.9993	493.991	0.00878044	493.982	0.0175609	494	3.55483e-05	0.000293438
		0.629	1519	30	1489	60	1549	0.0387347	0.0385852		0.9993	494.991	0.00889819	494.982	0.0177964	495	3.59523e-05	0.000293438
		0.6286	1520	30	1490	60	1550	0.0387097	0.0385852		0.9993	495.991	0.00901712	495.982	0.0180342	496	3.63593e-05	0.000293438
		0.6269	1521	30	1491	60	1551	0.0386847	0.0385852		0.9993	496.991	0.00913723	496.982	0.0182745	497	3.67695e-05	0.000293438
		0.6232	1522	30	1492	60	1552	0.0386598	0.0385852		0.9993	497.991	0.00925853	497.981	0.0185171	498	3.71829e-05	0.000293438
		0.6231	1523	30	1493	60	1553	0.0386349	0.0385852		0.9993	498.991	0.00938103	498.981	0.0187621	499	3.75993e-05	0.000293438
		0.6198	1525	30	1495	60	1555	0.0385852	0.0385852		0.9993	499.99	0.00950474	499.981	0.0190095	500	3.8019e-05	0.000293438
		0.6173	1525	31	1494	62	1556	0.0398458	0.0397946		0.9993	500.99	0.00962966	500.981	0.0192593	501	3.84418e-05	0.000293438
		0.6164	1526	31	1495	62	1557	0.0398202	0.0397946		0.9993	501.99	0.0097558	501.98	0.0195116	502	3.88677e-05	0.000293438
		0.612	1527	31	1496	62	1558	0.0397946	0.0397946		0.9993	502.99	0.00988317	502.98	0.0197663	503	3.92969e-05	0.000293438
		0.6113	1529	32	1497	64	1561	0.0409994	0.0409731		0.9993	503.99	0.0100118	503.98	0.0200236	504	3.97293e-05	0.000293438
		0.6064	1530	32	1498	64	1562	0.0409731	0.0409731		0.9993	504.99	0.0101416	504.98	0.0202832	505	4.01648e-05	0.000293438
		0.6055	1530	33	1497	66	1563	0.0422265	0.0420115		0.9993	505.99	0.0102727	505.979	0.0205454	506	4.06037e-05	0.000293438
		0.6042	1531	33	1498	66	1564	0.0421995	0.0420115		0.9993	506.99	0.0104051	506.979	0.0208102	507	4.10457e-05	0.000293438
		0.6021	1532	33	1499	66	1565	0.0421725	0.0420115		0.9993	507.989	0.0105387	507.979	0.0210774	508	4.1491e-05	0.000293438
		0.6009	1533	33	1500	66	1566	0.0421456	0.0420115		0.9993	508.989	0.0106736	508.979	0.0213472	509	4.19395e-05	0.000293438
		0.6007	1534	33	1501	66	1567	0.0421187	0.0420115		0.9993	509.989	0.0108098	509.978	0.0216196	510	4.23913e-05	0.000293438
		0.5976	1535	33	1502	66	1568	0.0420918	0.0420115		0.9993	510.989	0.0109473	510.978	0.0218945	511	4.28464e-05	0.000293438
		0.5951	1536	33	1503	66	1569	0.042065	0.0420115		0.9993	511.989	0.011086	511.978	0.0221721	512	4.33048e-05	0.000293438
		0.5915	1538	33	1505	66	1571	0.0420115	0.0420115		0.9993	512.989	0.0112261	512.978	0.0224522	513	4.37665e-05	0.000293438
		0.5828	1538	34	1504	68	1572	0.043257	0.043038		0.9993	513.989	0.0113675	513.977	0.022735	514	4.42315e-05	0.000293438
		0.5813	1539	34	1505	68	1573	0.0432295	0.043038		0.9993	514.988	0.0115102	514.977	0.0230204	515	4.46998e-05	0.000293438
		0.5792	1540	34	1506	68	1574	0.043202	0.043038		0.9993	515.988	0.0116542	515.977	0.0233085	516	4.51715e-05	0.000293438
		0.578	1541	34	1507	68	1575	0.0431746	0.043038		0.9993	516.988	0.0117996	516.976	0.0235992	517	4.56465e-05	0.000293438
		0.5752	1542	34	1508	68	1576	0.0431472	0.043038		0.9993	517.988	0.0119463	517.976	0.0238927	518	4.61248e-05	0.000293438
		0.5742	1543	34	1509	68	1577	0.0431198	0.043038		0.9993	518.988	0.0120944	518.976	0.0241888	519	4.66066e-05	0.000293438
		0.57	1544	34	1510	68	1578	0.0430925	0.043038		0.9993	519.988	0.0122438	519.976	0.0244877	520	4.70917e-05	0.000293438
		0.5692	1545	34	1511	68	1579	0.0430652	0.043038		0.9993	520.988	0.0123946	520.975	0.0247893	521	4.75802e-05	0.000293438
		0.5691	1546	34	1512	68	1580	0.043038	0.043038		0.9993	521.987	0.0125468	521.975	0.0250936	522	4.80721e-05	0.000293438
		0.5689	1546	35	1511	70	1581	0.0442758	0.04375		0.9993	522.987	0.0127004	522.975	0.0254008	523	4.85674e-05	0.000293438
		0.5673	1548	35	1513	70	1583	0.0442198	0.04375		0.9993	523.987	0.0128553	523.974	0.0257107	524	4.90662e-05	0.000293438
		0.5665	1549	35	1514	70	1584	0.0441919	0.04375		0.9993	524.987	0.0130117	524.974	0.0260234	525	4.95684e-05	0.000293438
		0.5652	1550	35	1515	70	1585	0.044164	0.04375		0.9993	525.987	0.0131695	525.974	0.0263389	526	5.0074e-05	0.000293438
		0.5639	1551	35	1516	70	1586	0.0441362	0.04375		0.9993	526.987	0.0133286	526.973	0.0266573	527	5.05831e-05	0.000293438
		0.5629	1552	35	1517	70	1587	0.0441084	0.04375		0.9993	527.987	0.0134892	527.973	0.0269785	528	5.10956e-05	0.000293438
		0.5621	1554	35	1519	70	1589	0.0440529	0.04375		0.9993	528.986	0.0136513	528.973	0.0273026	529	5.16117e-05	0.000293438
		0.5589	1557	35	1522	70	1592	0.0439698	0.04375		0.9993	529.986	0.0138148	529.972	0.0276296	530	5.21312e-05	0.000293438
		0.5568	1558	35	1523	70	1593	0.0439422	0.04375		0.9993	530.986	0.0139797	530.972	0.0279594	531	5.26543e-05	0.000293438
		0.5559	1559	35	1524	70	1594	0.0439147	0.04375		0.9993	531.986	0.0141461	531.972	0.0282922	532	5.31808e-05	0.000293438
		0.5533	1560	35	1525	70	1595	0.0438871	0.04375		0.9993	532.986	0.014314	532.971	0.0286279	533	5.37109e-05	0.000293438
		0.551	1561	35	1526	70	1596	0.0438596	0.04375		0.9993	533.986	0.0144833	533.971	0.0289666	534	5.42446e-05	0.000293438
		0.5475	1562	35	1527	70	1597	0.0438322	0.04375		0.9993	534.985	0.0146541	534.971	0.0293082	535	5.47818e-05	0.000293438
		0.5445	1563	35	1528	70	1598	0.0438048	0.04375		0.9993	535.985	0.0148264	535.97	0.0296529	536	5.53225e-05	0.000293438
		0.5434	1564	35	1529	70	1599	0.0437774	0.04375		0.9993	536.985	0.0150002	536.97	0.0300005	537	5.58668e-05	0.000293438
		0.5426	1565	35	1530	70	1600	0.04375	0.04375		0.9993	537.985	0.0151756	537.97	0.0303511	538	5.64147e-05	0.000293438
		0.5401	1565	36	1529	72	1601	0.0449719	0.0448598		0.9993	538.985	0.0153524	538.969	0.0307048	539	5.69662e-05	0.000293438
		0.5375	1566	36	1530	72	1602	0.0449438	0.0448598		0.9993	539.984	0.0155308	539.969	0.0310615	540	5.75214e-05	0.000293438
		0.5345	1567	36	1531	72	1603	0.0449158	0.0448598		0.9993	540.984	0.0157107	540.969	0.0314213	541	5.80801e-05	0.000293438
		0.533	1568	36	1532	72	1604	0.0448878	0.0448598		0.9993	541.984	0.0158921	541.968	0.0317842	542	5.86425e-05	0.000293438
		0.5329	1569	36	1533	72	1605	0.0448598	0.0448598		0.9993	542.984	0.0160751	542.968	0.0321502	543	5.92085e-05	0.000293438
		0.5321	1569	37	1532	74	1606	0.0460772	0.0460485		0.9992	543.984	0.0162597	543.967	0.0325193	544	5.97782e-05	0.000401294
		0.532	1570	37	1533	74	1607	0.0460485	0.0460485		0.9992	544.984	0.0164458	544.967	0.0328916	545	6.03515e-05	0.000401294
		0.5317	1570	38	1532	76	1608	0.0472637	0.0471464		0.9992	545.983	0.0166335	545.967	0.033267	546	6.09285e-05	0.000401294
		0.5215	1572	38	1534	76	1610	0.047205	0.0471464		0.9992	546.983	0.0168228	546.966	0.0336456	547	6.15092e-05	0.000401294
		0.5214	1573	38	1535	76	1611	0.0471757	0.0471464		0.9992	547.983	0.0170137	547.966	0.0340273	548	6.20937e-05	0.000401294
		0.5201	1574	38	1536	76	1612	0.0471464	0.0471464		0.9992	548.983	0.0172062	548.966	0.0344123	549	6.26818e-05	0.000401294
		0.52	1574	39	1535	78	1613	0.0483571	0.0482673		0.9992	549.983	0.0174003	549.965	0.0348005	550	6.32737e-05	0.000401294
		0.5165	1575	39	1536	78	1614	0.0483271	0.0482673		0.9992	550.982	0.017596	550.965	0.035192	551	6.38693e-05	0.000401294
		0.516	1576	39	1537	78	1615	0.0482972	0.0482673		0.9992	551.982	0.0177933	551.964	0.0355867	552	6.44686e-05	0.000401294
		0.5151	1577	39	1538	78	1616	0.0482673	0.0482673		0.9992	552.982	0.0179923	552.964	0.0359847	553	6.50718e-05	0.000401294
		0.514	1577	40	1537	80	1617	0.0494743	0.0492005		0.9992	553.982	0.018193	553.964	0.036386	554	6.56787e-05	0.000401294
		0.5108	1578	40	1538	80	1618	0.0494438	0.0492005		0.9992	554.982	0.0183953	554.963	0.0367906	555	6.62893e-05	0.000401294
		0.5102	1579	40	1539	80	1619	0.0494132	0.0492005		0.9992	555.981	0.0185993	555.963	0.0371985	556	6.69038e-05	0.000401294
		0.5084	1580	40	1540	80	1620	0.0493827	0.0492005		0.9992	556.981	0.0188049	556.962	0.0376098	557	6.75221e-05	0.000401294
		0.5075	1581	40	1541	80	1621	0.0493523	0.0492005		0.9992	557.981	0.0190123	557.962	0.0380245	558	6.81443e-05	0.000401294
		0.5056	1582	40	1542	80	1622	0.0493218	0.0492005		0.9992	558.981	0.0192213	558.962	0.0384426	559	6.87702e-05	0.000401294
		0.501	1583	40	1543	80	1623	0.0492914	0.0492005		0.9992	559.981	0.019432	559.961	0.038864	560	6.94001e-05	0.000401294
		0.5002	1584	40	1544	80	1624	0.0492611	0.0492005		0.9992	560.98	0.0196445	560.961	0.0392889	561	7.00338e-05	0.000401294
		0.4978	1585	40	1545	80	1625	0.0492308	0.0492005		0.9992	561.98	0.0198586	561.96	0.0397173	562	7.06713e-05	0.000401294
		0.4967	1586	40	1546	80	1626	0.0492005	0.0492005		0.9992	562.98	0.0200745	562.96	0.0401491	563	7.13128e-05	0.000401294
		0.4949	1587	41	1546	82	1628	0.0503686	0.0502759		0.9992	563.98	0.0202922	563.959	0.0405844	564	7.19581e-05	0.000401294
		0.4948	1588	41	1547	82	1629	0.0503376	0.0502759		0.9991	564.979	0.0205116	564.959	0.0410232	565	7.26074e-05	0.000484195
		0.4946	1589	41	1548	82	1630	0.0503067	0.0502759		0.9991	565.979	0.0207327	565.959	0.0414655	566	7.32606e-05	0.000484195
		0.4944	1590	41	1549	82	1631	0.0502759	0.0502759		0.9991	566.979	0.0209557	566.958	0.0419113	567	7.39177e-05	0.000484195
		0.4907	1590	42	1548	84	1632	0.0514706	0.0514391		0.9991	567.979	0.0211804	567.958	0.0423608	568	7.45788e-05	0.000484195
		0.4897	1591	42	1549	84	1633	0.0514391	0.0514391		0.9991	568.979	0.0214069	568.957	0.0428137	569	7.52438e-05	0.000484195
		0.4894	1591	43	1548	86	1634	0.0526316	0.0525351		0.9991	569.978	0.0216352	569.957	0.0432703	570	7.59129e-05	0.000484195
		0.485	1592	43	1549	86	1635	0.0525994	0.0525351		0.9991	570.978	0.0218653	570.956	0.0437305	571	7.65859e-05	0.000484195
		0.4823	1593	43	1550	86	1636	0.0525672	0.0525351		0.9991	571.978	0.0220972	571.956	0.0441944	572	7.72629e-05	0.000484195
		0.4811	1594	43	1551	86	1637	0.0525351	0.0525351		0.9991	572.978	0.0223309	572.955	0.0446619	573	7.7944e-05	0.000484195
		0.4792	1595	44	1551	88	1639	0.0536913	0.0535932		0.9991	573.977	0.0225665	573.955	0.0451331	574	7.8629e-05	0.000484195
		0.4789	1598	44	1554	88	1642	0.0535932	0.0535932		0.9991	574.977	0.022804	574.954	0.0456079	575	7.93182e-05	0.000484195
		0.477	1599	45	1554	90	1644	0.0547445	0.0547112		0.9991	575.977	0.0230433	575.954	0.0460865	576	8.00113e-05	0.000484195
		0.4752	1600	45	1555	90	1645	0.0547112	0.0547112		0.9991	576.977	0.0232844	576.953	0.0465688	577	8.07086e-05	0.000484195
		0.4751	1600	46	1554	92	1646	0.0558931	0.0557238		0.9991	577.976	0.0235275	577.953	0.0470549	578	8.14099e-05	0.000484195
		0.474	1602	46	1556	92	1648	0.0558252	0.0557238		0.9991	578.976	0.0237724	578.952	0.0475448	579	8.21153e-05	0.000484195
		0.4734	1603	46	1557	92	1649	0.0557914	0.0557238		0.9991	579.976	0.0240192	579.952	0.0480384	580	8.28249e-05	0.000484195
		0.4725	1604	46	1558	92	1650	0.0557576	0.0557238		0.9991	580.976	0.0242679	580.951	0.0485359	581	8.35385e-05	0.000484195
		0.4719	1605	46	1559	92	1651	0.0557238	0.0557238		0.9991	581.975	0.0245186	581.951	0.0490372	582	8.42563e-05	0.000484195
		0.4682	1605	47	1558	94	1652	0.0569007	0.0565244		0.9991	582.975	0.0247712	582.95	0.0495423	583	8.49783e-05	0.000484195
		0.4679	1611	47	1564	94	1658	0.0566948	0.0565244		0.9991	583.975	0.0250257	583.95	0.0500514	584	8.57044e-05	0.000484195
		0.4678	1612	47	1565	94	1659	0.0566606	0.0565244		0.9991	584.975	0.0252821	584.949	0.0505643	585	8.64347e-05	0.000484195
		0.4657	1613	47	1566	94	1660	0.0566265	0.0565244		0.9991	585.974	0.0255406	585.949	0.0510811	586	8.71692e-05	0.000484195
		0.4637	1614	47	1567	94	1661	0.0565924	0.0565244		0.9991	586.974	0.025801	586.948	0.0516019	587	8.79079e-05	0.000484195
		0.4634	1615	47	1568	94	1662	0.0565584	0.0565244		0.9991	587.974	0.0260633	587.948	0.0521267	588	8.86508e-05	0.000484195
		0.4623	1616	47	1569	94	1663	0.0565244	0.0565244		0.9991	588.974	0.0263277	588.947	0.0526554	589	8.93979e-05	0.000484195
		0.462	1616	48	1568	96	1664	0.0576923	0.057485		0.9991	589.973	0.0265941	589.947	0.0531881	590	9.01494e-05	0.000484195
		0.4618	1617	48	1569	96	1665	0.0576577	0.057485		0.999	590.973	0.0268624	590.946	0.0537249	591	9.0905e-05	0.000550998
		0.4612	1618	48	1570	96	1666	0.057623	0.057485		0.999	591.973	0.0271328	591.946	0.0542657	592	9.1665e-05	0.000550998
		0.459	1619	48	1571	96	1667	0.0575885	0.057485		0.999	592.973	0.0274053	592.945	0.0548105	593	9.24292e-05	0.000550998
		0.4585	1620	48	1572	96	1668	0.057554	0.057485		0.999	593.972	0.0276797	593.945	0.0553595	594	9.31978e-05	0.000550998
		0.4577	1621	48	1573	96	1669	0.0575195	0.057485		0.999	594.972	0.0279563	594.944	0.0559125	595	9.39706e-05	0.000550998
		0.4568	1622	48	1574	96	1670	0.057485	0.057485		0.999	595.972	0.0282349	595.944	0.0564697	596	9.47478e-05	0.000550998
		0.4564	1622	49	1573	98	1671	0.0586475	0.0584377		0.999	596.971	0.0285155	596.943	0.0570311	597	9.55294e-05	0.000550998
		0.4546	1624	49	1575	98	1673	0.0585774	0.0584377		0.999	597.971	0.0287983	597.942	0.0575966	598	9.63153e-05	0.000550998
		0.4544	1625	49	1576	98	1674	0.0585424	0.0584377		0.9989	598.971	0.0290831	598.942	0.0581663	599	9.71056e-05	0.000578168
		0.4535	1626	49	1577	98	1675	0.0585075	0.0584377		0.9989	599.971	0.0293701	599.941	0.0587402	600	9.79003e-05	0.000578168
		0.4534	1627	49	1578	98	1676	0.0584726	0.0584377		0.9989	600.97	0.0296592	600.941	0.0593184	601	9.86995e-05	0.000578168
		0.4502	1628	49	1579	98	1677	0.0584377	0.0584377		0.9989	601.97	0.0299504	601.94	0.0599008	602	9.9503e-05	0.000578168
		0.4483	1628	50	1578	100	1678	0.0595948	0.0595948		0.9989	602.97	0.0302438	602.94	0.0604875	603	0.000100311	0.000578168
		0.4481	1628	51	1577	102	1679	0.0607504	0.0607504		0.9988	603.969	0.0305393	603.939	0.0610786	604	0.000101123	0.000593188
		0.4469	1628	52	1576	104	1680	0.0619048	0.0618679		0.9988	604.969	0.030837	604.938	0.0616739	605	0.00010194	0.000593188
		0.4459	1629	52	1577	104	1681	0.0618679	0.0618679		0.9987	605.969	0.0311368	605.938	0.0622736	606	0.000102762	0.000610695
		0.4438	1629	53	1576	106	1682	0.0630202	0.062759		0.9987	606.969	0.0314389	606.937	0.0628777	607	0.000103588	0.000610695
		0.4433	1630	53	1577	106	1683	0.0629828	0.062759		0.9987	607.968	0.0317431	607.937	0.0634862	608	0.000104418	0.000610695
		0.4415	1631	53	1578	106	1684	0.0629454	0.062759		0.9987	608.968	0.0320496	608.936	0.0640991	609	0.000105253	0.000610695
		0.4397	1632	53	1579	106	1685	0.062908	0.062759		0.9987	609.968	0.0323582	609.935	0.0647165	610	0.000106093	0.000610695
		0.4395	1633	53	1580	106	1686	0.0628707	0.062759		0.9987	610.967	0.0326691	610.935	0.0653383	611	0.000106937	0.000610695
		0.4388	1634	53	1581	106	1687	0.0628334	0.062759		0.9986	611.967	0.0329823	611.934	0.0659646	612	0.000107785	0.000633102
		0.4384	1635	53	1582	106	1688	0.0627962	0.062759		0.9986	612.967	0.0332977	612.933	0.0665954	613	0.000108639	0.000633102
		0.4363	1636	53	1583	106	1689	0.062759	0.062759		0.9986	613.966	0.0336154	613.933	0.0672308	614	0.000109496	0.000633102
		0.4353	1636	54	1582	108	1690	0.0639053	0.0639053		0.9986	614.966	0.0339354	614.932	0.0678708	615	0.000110359	0.000633102
		0.4337	1636	55	1581	110	1691	0.0650503	0.0649351		0.9985	615.966	0.0342576	615.931	0.0685153	616	0.000111226	0.000658439
		0.4331	1637	55	1582	110	1692	0.0650118	0.0649351		0.9985	616.965	0.0345822	616.931	0.0691644	617	0.000112098	0.000658439
		0.4322	1638	55	1583	110	1693	0.0649734	0.0649351		0.9985	617.965	0.0349091	617.93	0.0698182	618	0.000112974	0.000658439
		0.4312	1639	55	1584	110	1694	0.0649351	0.0649351		0.9985	618.965	0.0352383	618.93	0.0704766	619	0.000113856	0.000658439
		0.4283	1639	56	1583	112	1695	0.0660767	0.0659988		0.9985	619.964	0.0355699	619.929	0.0711398	620	0.000114742	0.000658439
		0.428	1640	56	1584	112	1696	0.0660377	0.0659988		0.9985	620.964	0.0359038	620.928	0.0718076	621	0.000115632	0.000658439
		0.4277	1641	56	1585	112	1697	0.0659988	0.0659988		0.9985	621.964	0.0362401	621.928	0.0724802	622	0.000116528	0.000658439
		0.427	1641	57	1584	114	1698	0.0671378	0.0670588		0.9984	622.963	0.0365788	622.927	0.0731575	623	0.000117428	0.000686926
		0.423	1642	57	1585	114	1699	0.0670983	0.0670588		0.9984	623.963	0.0369198	623.926	0.0738396	624	0.000118333	0.000686926
		0.4218	1643	57	1586	114	1700	0.0670588	0.0670588		0.9984	624.963	0.0372633	624.925	0.0745266	625	0.000119242	0.000686926
		0.4217	1643	58	1585	116	1701	0.0681952	0.0681151		0.9984	625.962	0.0376092	625.925	0.0752183	626	0.000120157	0.000686926
		0.4206	1644	58	1586	116	1702	0.0681551	0.0681151		0.9984	626.962	0.0379575	626.924	0.0759149	627	0.000121076	0.000686926
		0.4193	1645	58	1587	116	1703	0.0681151	0.0681151		0.9983	627.962	0.0383082	627.923	0.0766165	628	0.000122001	0.000703963
		0.4189	1645	59	1586	118	1704	0.0692488	0.0691271		0.9983	628.961	0.0386614	628.923	0.0773229	629	0.00012293	0.000703963
		0.4161	1646	59	1587	118	1705	0.0692082	0.0691271		0.9982	629.961	0.0390171	629.922	0.0780342	630	0.000123864	0.000799424
		0.4151	1647	59	1588	118	1706	0.0691676	0.0691271		0.9982	630.961	0.0393753	630.921	0.0787506	631	0.000124803	0.000799424
		0.4149	1648	59	1589	118	1707	0.0691271	0.0691271		0.9982	631.96	0.0397359	631.921	0.0794719	632	0.000125747	0.000799424
		0.414	1648	60	1588	120	1708	0.0702576	0.0702165		0.9982	632.96	0.0400991	632.92	0.0801982	633	0.000126695	0.000799424
		0.4098	1649	60	1589	120	1709	0.0702165	0.0702165		0.9982	633.96	0.0404648	633.919	0.0809296	634	0.000127649	0.000799424
		0.4087	1649	61	1588	122	1710	0.071345	0.0709715		0.9982	634.959	0.040833	634.918	0.081666	635	0.000128608	0.000799424
		0.4082	1650	61	1589	122	1711	0.0713033	0.0709715		0.9982	635.959	0.0412038	635.918	0.0824076	636	0.000129572	0.000799424
		0.4071	1651	61	1590	122	1712	0.0712617	0.0709715		0.9982	636.958	0.0415771	636.917	0.0831543	637	0.00013054	0.000799424
		0.4059	1652	61	1591	122	1713	0.0712201	0.0709715		0.9982	637.958	0.041953	637.916	0.0839061	638	0.000131514	0.000799424
		0.4054	1653	61	1592	122	1714	0.0711785	0.0709715		0.9982	638.958	0.0423315	638.915	0.0846631	639	0.000132493	0.000799424
		0.4043	1654	61	1593	122	1715	0.071137	0.0709715		0.9982	639.957	0.0427126	639.915	0.0854253	640	0.000133477	0.000799424
		0.403	1655	61	1594	122	1716	0.0710956	0.0709715		0.9982	640.957	0.0430964	640.914	0.0861927	641	0.000134466	0.000799424
		0.4004	1656	61	1595	122	1717	0.0710542	0.0709715		0.9982	641.957	0.0434827	641.913	0.0869654	642	0.00013546	0.000799424
		0.3991	1657	61	1596	122	1718	0.0710128	0.0709715		0.9982	642.956	0.0438717	642.912	0.0877434	643	0.000136459	0.000799424
		0.398	1658	61	1597	122	1719	0.0709715	0.0709715		0.9982	643.956	0.0442634	643.911	0.0885267	644	0.000137464	0.000799424
		0.3946	1658	62	1596	124	1720	0.072093	0.0719675		0.9982	644.955	0.0446577	644.911	0.0893154	645	0.000138473	0.000799424
		0.3943	1659	62	1597	124	1721	0.0720511	0.0719675		0.9982	645.955	0.0450547	645.91	0.0901094	646	0.000139488	0.000799424
		0.3939	1660	62	1598	124	1722	0.0720093	0.0719675		0.9982	646.955	0.0454544	646.909	0.0909088	647	0.000140508	0.000799424
		0.3936	1661	62	1599	124	1723	0.0719675	0.0719675		0.9982	647.954	0.0458568	647.908	0.0917137	648	0.000141533	0.000799424
		0.3922	1662	63	1599	126	1725	0.0730435	0.0730012		0.9982	648.954	0.046262	648.907	0.092524	649	0.000142564	0.000799424
		0.3915	1663	63	1600	126	1726	0.0730012	0.0730012		0.9982	649.953	0.0466699	649.907	0.0933398	650	0.0001436	0.000799424
		0.3904	1663	64	1599	128	1727	0.074117	0.0740741		0.9982	650.953	0.0470806	650.906	0.0941611	651	0.000144641	0.000799424
		0.3899	1664	64	1600	128	1728	0.0740741	0.0740741		0.9982	651.953	0.047494	651.905	0.094988	652	0.000145687	0.000799424
		0.3896	1664	65	1599	130	1729	0.075188	0.0751011		0.9982	652.952	0.0479102	652.904	0.0958204	653	0.000146739	0.000799424
		0.3895	1665	65	1600	130	1730	0.0751445	0.0751011		0.9982	653.952	0.0483292	653.903	0.0966585	654	0.000147796	0.000799424
		0.3884	1666	65	1601	130	1731	0.0751011	0.0751011		0.9982	654.951	0.0487511	654.902	0.0975022	655	0.000148858	0.000799424
		0.3864	1666	66	1600	132	1732	0.0762125	0.0762125		0.9982	655.951	0.0491758	655.902	0.0983515	656	0.000149926	0.000799424
		0.3861	1666	67	1599	134	1733	0.0773226	0.0770558		0.9982	656.95	0.0496033	656.901	0.0992066	657	0.000150999	0.000799424
		0.3857	1667	67	1600	134	1734	0.077278	0.0770558		0.9982	657.95	0.0500337	657.9	0.100067	658	0.000152078	0.000799424
		0.385	1668	67	1601	134	1735	0.0772334	0.0770558		0.9982	658.95	0.0504669	658.899	0.100934	659	0.000153162	0.000799424
		0.3839	1669	67	1602	134	1736	0.0771889	0.0770558		0.9982	659.949	0.0509031	659.898	0.101806	660	0.000154252	0.000799424
		0.383	1670	67	1603	134	1737	0.0771445	0.0770558		0.9982	660.949	0.0513422	660.897	0.102684	661	0.000155347	0.000799424
		0.3822	1671	67	1604	134	1738	0.0771001	0.0770558		0.9982	661.948	0.0517842	661.896	0.103568	662	0.000156448	0.000799424
		0.3799	1672	67	1605	134	1739	0.0770558	0.0770558		0.9982	662.948	0.0522291	662.896	0.104458	663	0.000157554	0.000799424
		0.3791	1672	68	1604	136	1740	0.0781609	0.0780712		0.9982	663.947	0.052677	663.895	0.105354	664	0.000158666	0.000799424
		0.3788	1673	68	1605	136	1741	0.078116	0.0780712		0.9981	664.947	0.0531278	664.894	0.106256	665	0.000159783	0.000901727
		0.3777	1674	68	1606	136	1742	0.0780712	0.0780712		0.998	665.946	0.0535817	665.893	0.107163	666	0.000160906	0.000913712
		0.3767	1674	69	1605	138	1743	0.0791738	0.0789474		0.998	666.946	0.0540386	666.892	0.108077	667	0.000162035	0.000913712
		0.3756	1675	69	1606	138	1744	0.0791284	0.0789474		0.998	667.946	0.0544984	667.891	0.108997	668	0.000163169	0.000913712
		0.375	1676	69	1607	138	1745	0.0790831	0.0789474		0.9979	668.945	0.0549613	668.89	0.109923	669	0.000164309	0.000925826
		0.3741	1677	69	1608	138	1746	0.0790378	0.0789474		0.9978	669.945	0.0554273	669.889	0.110855	670	0.000165455	0.000941153
		0.3726	1678	69	1609	138	1747	0.0789926	0.0789474		0.9978	670.944	0.0558963	670.888	0.111793	671	0.000166606	0.000941153
		0.3721	1679	69	1610	138	1748	0.0789474	0.0789474		0.9978	671.944	0.0563685	671.887	0.112737	672	0.000167763	0.000941153
		0.3712	1679	70	1609	140	1749	0.0800457	0.0800457		0.9978	672.943	0.0568437	672.886	0.113687	673	0.000168926	0.000941153
		0.3706	1679	71	1608	142	1750	0.0811429	0.0810502		0.9977	673.943	0.057322	673.885	0.114644	674	0.000170095	0.000966109
		0.3692	1680	71	1609	142	1751	0.0810965	0.0810502		0.9977	674.942	0.0578035	674.884	0.115607	675	0.00017127	0.000966109
		0.3685	1681	71	1610	142	1752	0.0810502	0.0810502		0.9977	675.942	0.0582882	675.883	0.116576	676	0.00017245	0.000966109
		0.3675	1681	72	1609	144	1753	0.0821449	0.0819579		0.9977	676.941	0.058776	676.882	0.117552	677	0.000173637	0.000966109
		0.3668	1682	72	1610	144	1754	0.0820981	0.0819579		0.9975	677.941	0.059267	677.881	0.118534	678	0.000174829	0.000994836
		0.3637	1683	72	1611	144	1755	0.0820513	0.0819579		0.9975	678.94	0.0597611	678.88	0.119522	679	0.000176027	0.000994836
		0.3632	1684	72	1612	144	1756	0.0820046	0.0819579		0.9975	679.94	0.0602586	679.879	0.120517	680	0.000177231	0.000994836
		0.3623	1685	72	1613	144	1757	0.0819579	0.0819579		0.9975	680.939	0.0607592	680.878	0.121518	681	0.000178441	0.000994836
		0.3615	1685	73	1612	146	1758	0.0830489	0.0826259		0.9975	681.939	0.0612631	681.877	0.122526	682	0.000179657	0.000994836
		0.3614	1686	73	1613	146	1759	0.0830017	0.0826259		0.9974	682.938	0.0617703	682.876	0.123541	683	0.000180879	0.00102097
		0.3588	1687	73	1614	146	1760	0.0829545	0.0826259		0.9974	683.938	0.0622808	683.875	0.124562	684	0.000182108	0.00102097
		0.3587	1688	73	1615	146	1761	0.0829074	0.0826259		0.9974	684.937	0.0627946	684.874	0.125589	685	0.000183342	0.00102097
		0.3583	1690	73	1617	146	1763	0.0828134	0.0826259		0.9973	685.937	0.0633117	685.873	0.126623	686	0.000184582	0.00103424
		0.3581	1691	73	1618	146	1764	0.0827664	0.0826259		0.9972	686.936	0.0638322	686.872	0.127664	687	0.000185829	0.00104094
		0.357	1692	73	1619	146	1765	0.0827195	0.0826259		0.9971	687.936	0.064356	687.871	0.128712	688	0.000187082	0.00105444
		0.3562	1693	73	1620	146	1766	0.0826727	0.0826259		0.9971	688.935	0.0648833	688.87	0.129767	689	0.00018834	0.00105444
		0.355	1694	73	1621	146	1767	0.0826259	0.0826259		0.9971	689.935	0.0654139	689.869	0.130828	690	0.000189605	0.00105444
		0.3541	1694	74	1620	148	1768	0.0837104	0.0836631		0.997	690.934	0.0659479	690.868	0.131896	691	0.000190877	0.00108535
		0.3537	1695	74	1621	148	1769	0.0836631	0.0836631		0.997	691.934	0.0664854	691.867	0.132971	692	0.000192154	0.00108535
		0.3535	1695	75	1620	150	1770	0.0847458	0.0846501		0.997	692.933	0.0670263	692.866	0.134053	693	0.000193438	0.00108535
		0.3525	1696	75	1621	150	1771	0.0846979	0.0846501		0.997	693.932	0.0675708	693.865	0.135142	694	0.000194728	0.00108535
		0.3513	1697	75	1622	150	1772	0.0846501	0.0846501		0.997	694.932	0.0681187	694.864	0.136237	695	0.000196025	0.00108535
		0.351	1697	76	1621	152	1773	0.0857304	0.0857304		0.997	695.931	0.0686701	695.863	0.13734	696	0.000197328	0.00108535
		0.3488	1697	77	1620	154	1774	0.0868095	0.0866629		0.9969	696.931	0.0692251	696.862	0.13845	697	0.000198637	0.00110993
		0.3464	1698	77	1621	154	1775	0.0867606	0.0866629		0.9968	697.93	0.0697836	697.86	0.139567	698	0.000199953	0.00111704
		0.3449	1699	77	1622	154	1776	0.0867117	0.0866629		0.9967	698.93	0.0703457	698.859	0.140691	699	0.000201275	0.00112777
		0.3441	1700	77	1623	154	1777	0.0866629	0.0866629		0.9967	699.929	0.0709114	699.858	0.141823	700	0.000202604	0.00112777
		0.3418	1700	78	1622	156	1778	0.087739	0.087739		0.9966	700.929	0.0714807	700.857	0.142961	701	0.000203939	0.00123629
		0.3395	1700	79	1621	158	1779	0.0888139	0.0887142		0.9966	701.928	0.0720536	701.856	0.144107	702	0.000205281	0.00123629
		0.3385	1701	79	1622	158	1780	0.088764	0.0887142		0.9966	702.927	0.0726302	702.855	0.14526	703	0.000206629	0.00123629
		0.3364	1702	79	1623	158	1781	0.0887142	0.0887142		0.9966	703.927	0.0732105	703.854	0.146421	704	0.000207984	0.00123629
		0.3351	1702	80	1622	160	1782	0.0897868	0.0897364		0.9966	704.926	0.0737944	704.852	0.147589	705	0.000209346	0.00123629
		0.3309	1703	80	1623	160	1783	0.0897364	0.0897364		0.9966	705.926	0.0743821	705.851	0.148764	706	0.000210714	0.00123629
		0.3305	1704	81	1623	162	1785	0.0907563	0.0907055		0.9966	706.925	0.0749735	706.85	0.149947	707	0.000212089	0.00123629
		0.3285	1705	81	1624	162	1786	0.0907055	0.0907055		0.9966	707.924	0.0755687	707.849	0.151137	708	0.000213471	0.00123629
		0.3283	1705	82	1623	164	1787	0.0917739	0.0916713		0.9966	708.924	0.0761676	708.848	0.152335	709	0.000214859	0.00123629
		0.3282	1706	82	1624	164	1788	0.0917226	0.0916713		0.9966	709.923	0.0767703	709.846	0.153541	710	0.000216254	0.00123629
		0.3273	1707	82	1625	164	1789	0.0916713	0.0916713		0.9966	710.923	0.0773769	710.845	0.154754	711	0.000217657	0.00123629
		0.3262	1707	83	1624	166	1790	0.0927374	0.0925307		0.9966	711.922	0.0779873	711.844	0.155975	712	0.000219065	0.00123629
		0.324	1708	83	1625	166	1791	0.0926857	0.0925307		0.9966	712.921	0.0786016	712.843	0.157203	713	0.000220481	0.00123629
		0.3222	1710	83	1627	166	1793	0.0925823	0.0925307		0.9966	713.921	0.0792197	713.842	0.158439	714	0.000221904	0.00123629
		0.3219	1711	83	1628	166	1794	0.0925307	0.0925307		0.9966	714.92	0.0798418	714.84	0.159684	715	0.000223334	0.00123629
		0.3211	1711	84	1627	168	1795	0.0935933	0.0935933		0.9966	715.92	0.0804678	715.839	0.160936	716	0.00022477	0.00123629
		0.3205	1711	85	1626	170	1796	0.0946548	0.094235		0.9966	716.919	0.0810977	716.838	0.162195	717	0.000226214	0.00123629
		0.3204	1713	85	1628	170	1798	0.0945495	0.094235		0.9966	717.918	0.0817316	717.837	0.163463	718	0.000227665	0.00123629
		0.3201	1716	85	1631	170	1801	0.094392	0.094235		0.9966	718.918	0.0823695	718.835	0.164739	719	0.000229122	0.00123629
		0.3198	1717	85	1632	170	1802	0.0943396	0.094235		0.9966	719.917	0.0830114	719.834	0.166023	720	0.000230587	0.00123629
		0.3191	1718	85	1633	170	1803	0.0942873	0.094235		0.9966	720.916	0.0836574	720.833	0.167315	721	0.000232059	0.00123629
		0.3177	1719	85	1634	170	1804	0.094235	0.094235		0.9966	721.916	0.0843074	721.831	0.168615	722	0.000233538	0.00123629
		0.3173	1719	86	1633	172	1805	0.0952909	0.0951854		0.9966	722.915	0.0849615	722.83	0.169923	723	0.000235025	0.00123629
		0.3158	1720	86	1634	172	1806	0.0952381	0.0951854		0.9966	723.914	0.0856197	723.829	0.171239	724	0.000236518	0.00123629
		0.3157	1721	86	1635	172	1807	0.0951854	0.0951854		0.9966	724.914	0.086282	724.827	0.172564	725	0.000238019	0.00123629
		0.3147	1721	87	1634	174	1808	0.0962389	0.0960795		0.9966	725.913	0.0869485	725.826	0.173897	726	0.000239528	0.00123629
		0.3142	1722	87	1635	174	1809	0.0961857	0.0960795		0.9966	726.912	0.0876192	726.825	0.175238	727	0.000241043	0.00123629
		0.3129	1723	87	1636	174	1810	0.0961326	0.0960795		0.9965	727.912	0.0882941	727.823	0.176588	728	0.000242566	0.00134976
		0.3122	1724	87	1637	174	1811	0.0960795	0.0960795		0.9964	728.911	0.0889732	728.822	0.177946	729	0.000244097	0.00164583
		0.3109	1724	88	1636	176	1812	0.0971302	0.0967565		0.9964	729.91	0.0896566	729.821	0.179313	730	0.000245634	0.00164583
		0.3107	1725	88	1637	176	1813	0.0970767	0.0967565		0.9964	730.91	0.0903442	730.819	0.180688	731	0.00024718	0.00164583
		0.3102	1726	88	1638	176	1814	0.0970232	0.0967565		0.9964	731.909	0.0910361	731.818	0.182072	732	0.000248733	0.00164583
		0.3101	1727	88	1639	176	1815	0.0969697	0.0967565		0.9964	732.908	0.0917324	732.817	0.183465	733	0.000250293	0.00164583
		0.31	1728	88	1640	176	1816	0.0969163	0.0967565		0.9964	733.908	0.092433	733.815	0.184866	734	0.000251861	0.00164583
		0.3072	1729	88	1641	176	1817	0.096863	0.0967565		0.9964	734.907	0.0931379	734.814	0.186276	735	0.000253437	0.00164583
		0.3057	1730	88	1642	176	1818	0.0968097	0.0967565		0.9964	735.906	0.0938473	735.812	0.187695	736	0.00025502	0.00164583
		0.3049	1731	88	1643	176	1819	0.0967565	0.0967565		0.9964	736.905	0.0945611	736.811	0.189122	737	0.000256611	0.00164583
		0.3045	1731	89	1642	178	1820	0.0978022	0.0975342		0.9964	737.905	0.0952794	737.809	0.190559	738	0.00025821	0.00164583
		0.3043	1732	89	1643	178	1821	0.0977485	0.0975342		0.9964	738.904	0.0960021	738.808	0.192004	739	0.000259816	0.00164583
		0.3042	1733	89	1644	178	1822	0.0976948	0.0975342		0.9964	739.903	0.0967293	739.807	0.193459	740	0.000261431	0.00164583
		0.3027	1734	89	1645	178	1823	0.0976413	0.0975342		0.9964	740.903	0.0974611	740.805	0.194922	741	0.000263053	0.00164583
		0.3018	1735	89	1646	178	1824	0.0975877	0.0975342		0.9964	741.902	0.0981974	741.804	0.196395	742	0.000264683	0.00164583
		0.3017	1736	89	1647	178	1825	0.0975342	0.0975342		0.9964	742.901	0.0989382	742.802	0.197876	743	0.000266321	0.00164583
		0.3015	1736	90	1646	180	1826	0.0985761	0.0985222		0.9964	743.9	0.0996837	743.801	0.199367	744	0.000267967	0.00164583
		0.3011	1737	90	1647	180	1827	0.0985222	0.0985222		0.9964	744.9	0.100434	744.799	0.200868	745	0.000269621	0.00164583
		0.3008	1737	91	1646	182	1828	0.0995624	0.0994536		0.9964	745.899	0.101189	745.798	0.202377	746	0.000271283	0.00164583
		0.3006	1738	91	1647	182	1829	0.0995079	0.0994536		0.9964	746.898	0.101948	746.796	0.203896	747	0.000272953	0.00164583
		0.2998	1739	91	1648	182	1830	0.0994536	0.0994536		0.9964	747.897	0.102712	747.795	0.205424	748	0.000274632	0.00164583
		0.2995	1739	92	1647	184	1831	0.100492	0.100437		0.9964	748.897	0.103481	748.793	0.206962	749	0.000276318	0.00164583
		0.2987	1740	92	1648	184	1832	0.100437	0.100437		0.9964	749.896	0.104255	749.791	0.20851	750	0.000278013	0.00164583
		0.2985	1740	93	1647	186	1833	0.101473	0.101362		0.9964	750.895	0.105033	750.79	0.210067	751	0.000279716	0.00164583
		0.2979	1741	93	1648	186	1834	0.101418	0.101362		0.9964	751.894	0.105817	751.788	0.211633	752	0.000281427	0.00164583
		0.2977	1742	93	1649	186	1835	0.101362	0.101362		0.9964	752.893	0.106605	752.787	0.21321	753	0.000283147	0.00164583
		0.2974	1742	94	1648	188	1836	0.102397	0.102063		0.9964	753.893	0.107398	753.785	0.214796	754	0.000284875	0.00164583
		0.297	1743	94	1649	188	1837	0.102341	0.102063		0.9964	754.892	0.108196	754.784	0.216391	755	0.000286611	0.00164583
		0.2963	1744	94	1650	188	1838	0.102285	0.102063		0.9964	755.891	0.108999	755.782	0.217997	756	0.000288356	0.00164583
		0.2961	1745	94	1651	188	1839	0.102229	0.102063		0.9964	756.89	0.109806	756.78	0.219613	757	0.000290109	0.00164583
		0.296	1746	94	1652	188	1840	0.102174	0.102063		0.9964	757.889	0.110619	757.779	0.221239	758	0.000291871	0.00164583
		0.2959	1747	94	1653	188	1841	0.102118	0.102063		0.9964	758.889	0.111437	758.777	0.222874	759	0.000293642	0.00164583
		0.2953	1748	94	1654	188	1842	0.102063	0.102063		0.9964	759.888	0.11226	759.775	0.22452	760	0.000295421	0.00164583
		0.2944	1748	95	1653	190	1843	0.103093	0.102703		0.9964	760.887	0.113088	760.774	0.226176	761	0.000297209	0.00164583
		0.2942	1750	95	1655	190	1845	0.102981	0.102703		0.9964	761.886	0.113921	761.772	0.227842	762	0.000299006	0.00164583
		0.2931	1752	95	1657	190	1847	0.10287	0.102703		0.9964	762.885	0.114759	762.77	0.229519	763	0.000300811	0.00164583
		0.2923	1753	95	1658	190	1848	0.102814	0.102703		0.9964	763.884	0.115603	763.769	0.231206	764	0.000302625	0.00164583
		0.292	1754	95	1659	190	1849	0.102758	0.102703		0.9964	764.884	0.116451	764.767	0.232903	765	0.000304448	0.00164583
		0.2917	1755	95	1660	190	1850	0.102703	0.102703		0.9964	765.883	0.117305	765.765	0.234611	766	0.00030628	0.00164583
		0.2912	1755	96	1659	192	1851	0.103728	0.103672		0.9964	766.882	0.118164	766.764	0.236329	767	0.000308121	0.00164583
		0.2909	1756	96	1660	192	1852	0.103672	0.103672		0.9964	767.881	0.119029	767.762	0.238058	768	0.000309971	0.00164583
		0.2903	1756	97	1659	194	1853	0.104695	0.104695		0.9964	768.88	0.119899	768.76	0.239797	769	0.00031183	0.00164583
		0.2899	1756	98	1658	196	1854	0.105717	0.10566		0.9964	769.879	0.120774	769.758	0.241548	770	0.000313698	0.00164583
		0.2897	1757	98	1659	196	1855	0.10566	0.10566		0.9964	770.878	0.121654	770.757	0.243309	771	0.000315575	0.00164583
		0.2888	1757	99	1658	198	1856	0.106681	0.106681		0.9964	771.877	0.12254	771.755	0.245081	772	0.000317462	0.00164583
		0.2887	1757	100	1657	200	1857	0.107701	0.107643		0.9964	772.877	0.123432	772.753	0.246863	773	0.000319358	0.00164583
		0.2884	1758	100	1658	200	1858	0.107643	0.107643		0.9964	773.876	0.124329	773.751	0.248657	774	0.000321262	0.00164583
		0.2882	1758	101	1657	202	1859	0.108661	0.108544		0.9964	774.875	0.125231	774.75	0.250462	775	0.000323177	0.00164583
		0.2876	1759	101	1658	202	1860	0.108602	0.108544		0.9964	775.874	0.126139	775.748	0.252278	776	0.0003251	0.00164583
		0.2872	1760	101	1659	202	1861	0.108544	0.108544		0.9964	776.873	0.127053	776.746	0.254105	777	0.000327033	0.00164583
		0.2869	1760	102	1658	204	1862	0.10956	0.109442		0.9964	777.872	0.127972	777.744	0.255943	778	0.000328976	0.00164583
		0.2866	1761	102	1659	204	1863	0.109501	0.109442		0.9964	778.871	0.128897	778.742	0.257793	779	0.000330928	0.00164583
		0.2857	1762	102	1660	204	1864	0.109442	0.109442		0.9964	779.87	0.129827	779.74	0.259654	780	0.00033289	0.00164583
		0.2855	1762	103	1659	206	1865	0.110456	0.110278		0.9964	780.869	0.130763	780.738	0.261527	781	0.000334861	0.00164583
		0.2851	1763	103	1660	206	1866	0.110397	0.110278		0.9964	781.868	0.131705	781.737	0.263411	782	0.000336842	0.00164583
		0.2848	1765	103	1662	206	1868	0.110278	0.110278		0.9964	782.867	0.132653	782.735	0.265306	783	0.000338833	0.00164583
		0.2845	1765	104	1661	208	1869	0.111289	0.111289		0.9964	783.866	0.133607	783.733	0.267214	784	0.000340834	0.00164583
		0.2834	1765	105	1660	210	1870	0.112299	0.112299		0.9964	784.865	0.134566	784.731	0.269133	785	0.000342844	0.00164583
		0.2833	1765	106	1659	212	1871	0.113308	0.113006		0.9964	785.864	0.135532	785.729	0.271063	786	0.000344864	0.00164583
		0.2826	1766	106	1660	212	1872	0.113248	0.113006		0.9964	786.863	0.136503	786.727	0.273006	787	0.000346895	0.00164583
		0.2825	1767	106	1661	212	1873	0.113187	0.113006		0.9964	787.863	0.13748	787.725	0.274961	788	0.000348935	0.00164583
		0.2823	1768	106	1662	212	1874	0.113127	0.113006		0.9964	788.862	0.138464	788.723	0.276927	789	0.000350985	0.00164583
		0.2821	1769	106	1663	212	1875	0.113067	0.113006		0.9964	789.861	0.139453	789.721	0.278906	790	0.000353046	0.00164583
		0.2812	1770	106	1664	212	1876	0.113006	0.113006		0.9964	790.86	0.140448	790.719	0.280897	791	0.000355116	0.00164583
		0.2807	1771	107	1664	214	1878	0.113951	0.11389		0.9963	791.859	0.14145	791.717	0.2829	792	0.000357197	0.00200311
		0.2801	1772	107	1665	214	1879	0.11389	0.11389		0.9962	792.858	0.142458	792.715	0.284915	793	0.000359288	0.00202161
		0.2798	1772	108	1664	216	1880	0.114894	0.114894		0.9962	793.857	0.143472	793.713	0.286943	794	0.000361389	0.00202161
		0.2794	1772	109	1663	218	1881	0.115896	0.115896		0.9961	794.856	0.144492	794.711	0.288983	795	0.000363501	0.00218919
		0.279	1772	110	1662	220	1882	0.116897	0.116773		0.9961	795.854	0.145518	795.709	0.291036	796	0.000365623	0.00218919
		0.2789	1773	110	1663	220	1883	0.116835	0.116773		0.9961	796.853	0.146551	796.707	0.293102	797	0.000367756	0.00218919
		0.2784	1774	110	1664	220	1884	0.116773	0.116773		0.9961	797.852	0.14759	797.705	0.29518	798	0.0003699	0.00218919
		0.2781	1775	111	1664	222	1886	0.117709	0.117336		0.9961	798.851	0.148635	798.703	0.297271	799	0.000372053	0.00218919
		0.278	1778	111	1667	222	1889	0.117522	0.117336		0.9961	799.85	0.149687	799.701	0.299374	800	0.000374218	0.00218919
		0.2779	1779	111	1668	222	1890	0.11746	0.117336		0.9961	800.849	0.150746	800.699	0.301491	801	0.000376393	0.00218919
		0.2772	1780	111	1669	222	1891	0.117398	0.117336		0.9961	801.848	0.15181	801.696	0.303621	802	0.00037858	0.00218919
		0.2768	1781	111	1670	222	1892	0.117336	0.117336		0.9961	802.847	0.152882	802.694	0.305764	803	0.000380776	0.00218919
		0.2767	1781	112	1669	224	1893	0.118331	0.118331		0.9961	803.846	0.15396	803.692	0.307919	804	0.000382984	0.00218919
		0.2764	1781	113	1668	226	1894	0.119324	0.119324		0.9961	804.845	0.155044	804.69	0.310089	805	0.000385203	0.00218919
		0.2757	1782	115	1667	230	1897	0.121244	0.120798		0.9961	805.844	0.156136	805.688	0.312271	806	0.000387433	0.00218919
		0.2747	1784	115	1669	230	1899	0.121116	0.120798		0.9961	806.843	0.157234	806.686	0.314467	807	0.000389674	0.00218919
		0.274	1785	115	1670	230	1900	0.121053	0.120798		0.9961	807.842	0.158338	807.683	0.316676	808	0.000391926	0.00218919
		0.2736	1786	115	1671	230	1901	0.120989	0.120798		0.9961	808.841	0.15945	808.681	0.318899	809	0.00039419	0.00218919
		0.2735	1787	115	1672	230	1902	0.120925	0.120798		0.9961	809.839	0.160568	809.679	0.321136	810	0.000396464	0.00218919
		0.273	1788	115	1673	230	1903	0.120862	0.120798		0.9961	810.838	0.161693	810.677	0.323386	811	0.00039875	0.00218919
		0.2725	1789	115	1674	230	1904	0.120798	0.120798		0.9961	811.837	0.162825	811.674	0.325651	812	0.000401048	0.00218919
		0.2711	1790	116	1674	232	1906	0.121721	0.121593		0.9961	812.836	0.163964	812.672	0.327929	813	0.000403356	0.00218919
		0.2708	1791	116	1675	232	1907	0.121657	0.121593		0.9961	813.835	0.16511	813.67	0.330221	814	0.000405677	0.00218919
		0.2705	1792	116	1676	232	1908	0.121593	0.121593		0.9961	814.834	0.166264	814.667	0.332527	815	0.000408009	0.00218919
		0.2697	1792	117	1675	234	1909	0.122577	0.122002		0.9961	815.833	0.167424	815.665	0.334848	816	0.000410352	0.00218919
		0.2692	1793	117	1676	234	1910	0.122513	0.122002		0.9961	816.831	0.168591	816.663	0.337182	817	0.000412708	0.00218919
		0.2691	1794	117	1677	234	1911	0.122449	0.122002		0.9961	817.83	0.169766	817.66	0.339531	818	0.000415075	0.00218919
		0.269	1799	117	1682	234	1916	0.122129	0.122002		0.996	818.829	0.170947	818.658	0.341895	819	0.000417454	0.00237077
		0.2689	1800	117	1683	234	1917	0.122066	0.122002		0.996	819.828	0.172136	819.656	0.344273	820	0.000419845	0.00237077
		0.2687	1801	117	1684	234	1918	0.122002	0.122002		0.9959	820.827	0.173333	820.653	0.346666	821	0.000422248	0.00239268
		0.2686	1801	118	1683	236	1919	0.122981	0.122917		0.9958	821.825	0.174537	821.651	0.349073	822	0.000424663	0.00245967
		0.2681	1802	118	1684	236	1920	0.122917	0.122917		0.9958	822.824	0.175748	822.649	0.351495	823	0.00042709	0.00245967
		0.267	1802	119	1683	238	1921	0.123894	0.12338		0.9958	823.823	0.176966	823.646	0.353932	824	0.00042953	0.00245967
		0.266	1803	119	1684	238	1922	0.123829	0.12338		0.9958	824.822	0.178192	824.644	0.356385	825	0.000431981	0.00245967
		0.2659	1804	119	1685	238	1923	0.123765	0.12338		0.9958	825.821	0.179426	825.641	0.358852	826	0.000434445	0.00245967
		0.2648	1805	119	1686	238	1924	0.123701	0.12338		0.9958	826.819	0.180667	826.639	0.361334	827	0.000436922	0.00245967
		0.2641	1806	119	1687	238	1925	0.123636	0.12338		0.9958	827.818	0.181916	827.636	0.363832	828	0.000439411	0.00245967
		0.264	1807	119	1688	238	1926	0.123572	0.12338		0.9958	828.817	0.183173	828.634	0.366345	829	0.000441912	0.00245967
		0.2637	1808	119	1689	238	1927	0.123508	0.12338		0.9957	829.816	0.184437	829.631	0.368874	830	0.000444426	0.00253637
		0.2634	1809	119	1690	238	1928	0.123444	0.12338		0.9957	830.814	0.185709	830.629	0.371418	831	0.000446953	0.00253637
		0.2632	1810	119	1691	238	1929	0.12338	0.12338		0.9956	831.813	0.186989	831.626	0.373978	832	0.000449492	0.00259152
		0.2626	1810	120	1690	240	1930	0.124352	0.124224		0.9956	832.812	0.188277	832.623	0.376553	833	0.000452045	0.00259152
		0.2624	1811	120	1691	240	1931	0.124288	0.124224		0.9956	833.81	0.189572	833.621	0.379145	834	0.00045461	0.00259152
		0.2616	1812	120	1692	240	1932	0.124224	0.124224		0.9956	834.809	0.190876	834.618	0.381752	835	0.000457188	0.00259152
		0.2615	1812	121	1691	242	1933	0.125194	0.125194		0.9956	835.808	0.192188	835.616	0.384376	836	0.00045978	0.00259152
		0.2612	1812	122	1690	244	1934	0.126163	0.125903		0.9955	836.806	0.193508	836.613	0.387016	837	0.000462384	0.00267246
		0.26	1813	122	1691	244	1935	0.126098	0.125903		0.9955	837.805	0.194836	837.61	0.389672	838	0.000465002	0.00267246
		0.2598	1814	122	1692	244	1936	0.126033	0.125903		0.9955	838.804	0.196172	838.608	0.392344	839	0.000467633	0.00267246
		0.2583	1815	122	1693	244	1937	0.125968	0.125903		0.9955	839.802	0.197517	839.605	0.395033	840	0.000470278	0.00267246
		0.2582	1816	122	1694	244	1938	0.125903	0.125903		0.9955	840.801	0.198869	840.602	0.397739	841	0.000472936	0.00267246
		0.2581	1816	123	1693	246	1939	0.12687	0.126219		0.9954	841.8	0.200231	841.6	0.400461	842	0.000475607	0.00273067
		0.2577	1817	123	1694	246	1940	0.126804	0.126219		0.9954	842.798	0.2016	842.597	0.4032	843	0.000478292	0.00273067
		0.2576	1818	123	1695	246	1941	0.126739	0.126219		0.9953	843.797	0.202978	843.594	0.405956	844	0.000480991	0.00277306
		0.257	1819	123	1696	246	1942	0.126674	0.126219		0.9953	844.796	0.204365	844.591	0.408729	845	0.000483703	0.00277306
		0.2569	1821	123	1698	246	1944	0.126543	0.126219		0.9953	845.794	0.20576	845.588	0.411519	846	0.00048643	0.00277306
		0.256	1822	123	1699	246	1945	0.126478	0.126219		0.9952	846.793	0.207163	846.586	0.414327	847	0.00048917	0.0028599
		0.2557	1823	123	1700	246	1946	0.126413	0.126219		0.9952	847.791	0.208576	847.583	0.417152	848	0.000491924	0.0028599
		0.2554	1824	123	1701	246	1947	0.126348	0.126219		0.9952	848.79	0.209997	848.58	0.419994	849	0.000494693	0.0028599
		0.2548	1825	123	1702	246	1948	0.126283	0.126219		0.9952	849.789	0.211427	849.577	0.422854	850	0.000497475	0.0028599
		0.2546	1826	123	1703	246	1949	0.126219	0.126219		0.9952	850.787	0.212866	850.574	0.425732	851	0.000500272	0.0028599
		0.254	1826	124	1702	248	1950	0.127179	0.127179		0.9952	851.786	0.214313	851.571	0.428627	852	0.000503083	0.0028599
		0.2539	1826	125	1701	250	1951	0.128139	0.128139		0.9952	852.784	0.21577	852.568	0.43154	853	0.000505909	0.0028599
		0.2538	1826	126	1700	252	1952	0.129098	0.129032		0.9951	853.783	0.217236	853.566	0.434472	854	0.000508749	0.00294049
		0.2537	1827	126	1701	252	1953	0.129032	0.129032		0.9951	854.781	0.218711	854.563	0.437421	855	0.000511604	0.00294049
		0.2531	1827	128	1699	256	1955	0.130946	0.130746		0.995	855.78	0.220195	855.56	0.440389	856	0.000514473	0.00300481
		0.253	1828	128	1700	256	1956	0.130879	0.130746		0.995	856.778	0.221688	856.557	0.443376	857	0.000517358	0.00300481
		0.2526	1830	128	1702	256	1958	0.130746	0.130746		0.995	857.777	0.22319	857.554	0.44638	858	0.000520257	0.00300481
		0.2521	1830	129	1701	258	1959	0.1317	0.131498		0.995	858.775	0.224702	858.551	0.449404	859	0.000523171	0.00300481
		0.2519	1831	129	1702	258	1960	0.131633	0.131498		0.995	859.774	0.226223	859.548	0.452446	860	0.0005261	0.00300481
		0.2515	1832	129	1703	258	1961	0.131566	0.131498		0.9949	860.772	0.227754	860.544	0.455507	861	0.000529044	0.00350974
		0.2509	1833	129	1704	258	1962	0.131498	0.131498		0.9949	861.771	0.229294	861.541	0.458587	862	0.000532004	0.00350974
		0.2506	1833	130	1703	260	1963	0.13245	0.13198		0.9949	862.769	0.230843	862.538	0.461687	863	0.000534979	0.00350974
		0.2499	1834	130	1704	260	1964	0.132383	0.13198		0.9949	863.768	0.232403	863.535	0.464805	864	0.000537969	0.00350974
		0.2493	1835	130	1705	260	1965	0.132316	0.13198		0.9949	864.766	0.233972	864.532	0.467943	865	0.000540975	0.00350974
		0.2492	1836	130	1706	260	1966	0.132248	0.13198		0.9949	865.764	0.23555	865.529	0.471101	866	0.000543996	0.00350974
		0.2486	1837	130	1707	260	1967	0.132181	0.13198		0.9949	866.763	0.237139	866.526	0.474278	867	0.000547033	0.00350974
		0.2481	1838	130	1708	260	1968	0.132114	0.13198		0.9949	867.761	0.238737	867.523	0.477475	868	0.000550086	0.00350974
		0.248	1840	130	1710	260	1970	0.13198	0.13198		0.9949	868.76	0.240346	868.519	0.480691	869	0.000553155	0.00350974
		0.2479	1840	131	1709	262	1971	0.132927	0.132793		0.9949	869.758	0.241964	869.516	0.483928	870	0.000556239	0.00350974
		0.2477	1841	131	1710	262	1972	0.13286	0.132793		0.9949	870.756	0.243593	870.513	0.487185	871	0.00055934	0.00350974
		0.2468	1842	131	1711	262	1973	0.132793	0.132793		0.9949	871.755	0.245231	871.51	0.490463	872	0.000562457	0.00350974
		0.2464	1842	132	1710	264	1974	0.133739	0.133671		0.9949	872.753	0.24688	872.506	0.49376	873	0.00056559	0.00350974
		0.2459	1843	132	1711	264	1975	0.133671	0.133671		0.9949	873.751	0.248539	873.503	0.497079	874	0.00056874	0.00350974
		0.2457	1843	133	1710	266	1976	0.134615	0.134615		0.9949	874.75	0.250209	874.5	0.500418	875	0.000571906	0.00350974
		0.2455	1843	134	1709	268	1977	0.135559	0.13549		0.9949	875.748	0.251889	875.496	0.503778	876	0.000575089	0.00350974
		0.245	1844	134	1710	268	1978	0.13549	0.13549		0.9949	876.746	0.253579	876.493	0.507158	877	0.000578288	0.00350974
		0.2447	1844	135	1709	270	1979	0.136433	0.136364		0.9949	877.745	0.25528	877.489	0.51056	878	0.000581504	0.00350974
		0.2446	1845	135	1710	270	1980	0.136364	0.136364		0.9949	878.743	0.256992	878.486	0.513984	879	0.000584737	0.00350974
		0.2443	1845	136	1709	272	1981	0.137304	0.137235		0.9949	879.741	0.258714	879.483	0.517428	880	0.000587987	0.00350974
		0.2439	1846	136	1710	272	1982	0.137235	0.137235		0.9949	880.74	0.260447	880.479	0.520895	881	0.000591254	0.00350974
		0.2436	1846	137	1709	274	1983	0.138174	0.138105		0.9949	881.738	0.262191	881.476	0.524382	882	0.000594538	0.00350974
		0.2435	1847	137	1710	274	1984	0.138105	0.138105		0.9949	882.736	0.263946	882.472	0.527892	883	0.000597839	0.00350974
		0.243	1847	138	1709	276	1985	0.139043	0.138903		0.9949	883.734	0.265712	883.469	0.531424	884	0.000601158	0.00350974
		0.2425	1848	138	1710	276	1986	0.138973	0.138903		0.9949	884.733	0.267489	884.465	0.534978	885	0.000604495	0.00350974
		0.2414	1849	138	1711	276	1987	0.138903	0.138903		0.9949	885.731	0.269277	885.461	0.538554	886	0.000607849	0.00350974
		0.241	1849	139	1710	278	1988	0.139839	0.139628		0.9949	886.729	0.271076	886.458	0.542153	887	0.00061122	0.00350974
		0.2409	1851	139	1712	278	1990	0.139698	0.139628		0.9949	887.727	0.272887	887.454	0.545774	888	0.00061461	0.00350974
		0.2407	1852	139	1713	278	1991	0.139628	0.139628		0.9949	888.725	0.274709	888.451	0.549418	889	0.000618017	0.00350974
		0.2405	1852	140	1712	280	1992	0.140562	0.14021		0.9949	889.723	0.276542	889.447	0.553084	890	0.000621443	0.00350974
		0.2402	1853	140	1713	280	1993	0.140492	0.14021		0.9949	890.722	0.278387	890.443	0.556774	891	0.000624887	0.00350974
		0.2398	1854	140	1714	280	1994	0.140421	0.14021		0.9949	891.72	0.280244	891.44	0.560487	892	0.000628349	0.00350974
		0.2396	1855	140	1715	280	1995	0.140351	0.14021		0.9949	892.718	0.282112	892.436	0.564223	893	0.000631829	0.00350974
		0.2393	1856	140	1716	280	1996	0.140281	0.14021		0.9949	893.716	0.283992	893.432	0.567983	894	0.000635328	0.00350974
		0.2391	1857	140	1717	280	1997	0.14021	0.14021		0.9949	894.714	0.285883	894.428	0.571767	895	0.000638845	0.00350974
		0.2381	1858	141	1717	282	1999	0.141071	0.140789		0.9949	895.712	0.287787	895.424	0.575574	896	0.000642382	0.00350974
		0.238	1859	141	1718	282	2000	0.141	0.140789		0.9949	896.71	0.289703	896.421	0.579405	897	0.000645937	0.00350974
		0.2379	1860	141	1719	282	2001	0.14093	0.140789		0.9949	897.708	0.29163	897.417	0.583261	898	0.000649511	0.00350974
		0.2374	1861	141	1720	282	2002	0.140859	0.140789		0.9949	898.706	0.29357	898.413	0.58714	899	0.000653104	0.00350974
		0.2365	1862	141	1721	282	2003	0.140789	0.140789		0.9949	899.704	0.295522	899.409	0.591045	900	0.000656716	0.00350974
		0.2363	1862	142	1720	284	2004	0.141717	0.141646		0.9949	900.703	0.297487	900.405	0.594974	901	0.000660348	0.00350974
		0.2359	1863	142	1721	284	2005	0.141646	0.141646		0.9949	901.701	0.299464	901.401	0.598927	902	0.000663999	0.00350974
		0.2357	1863	143	1720	286	2006	0.142572	0.142572		0.9949	902.699	0.301453	902.397	0.602906	903	0.00066767	0.00350974
		0.2356	1864	144	1720	288	2008	0.143426	0.143141		0.9949	903.697	0.303455	903.393	0.60691	904	0.00067136	0.00350974
		0.2351	1865	144	1721	288	2009	0.143355	0.143141		0.9949	904.695	0.305469	904.389	0.610939	905	0.00067507	0.00350974
		0.2346	1866	144	1722	288	2010	0.143284	0.143141		0.9948	905.693	0.307497	905.385	0.614993	906	0.0006788	0.00405457
		0.2345	1867	144	1723	288	2011	0.143212	0.143141		0.9947	906.69	0.309537	906.381	0.619073	907	0.000682551	0.00413208
		0.2343	1868	144	1724	288	2012	0.143141	0.143141		0.9947	907.688	0.31159	907.377	0.62318	908	0.000686321	0.00413208
		0.2335	1868	145	1723	290	2013	0.144064	0.144064		0.9947	908.686	0.313656	908.373	0.627312	909	0.000690112	0.00413208
		0.2334	1868	146	1722	292	2014	0.144985	0.144913		0.9947	909.684	0.315735	909.369	0.63147	910	0.000693923	0.00413208
		0.2331	1869	146	1723	292	2015	0.144913	0.144913		0.9947	910.682	0.317827	910.364	0.635655	911	0.000697755	0.00413208
		0.2329	1869	147	1722	294	2016	0.145833	0.145761		0.9946	911.68	0.319933	911.36	0.639866	912	0.000701607	0.00426482
		0.2326	1870	147	1723	294	2017	0.145761	0.145761		0.9946	912.678	0.322052	912.356	0.644104	913	0.00070548	0.00426482
		0.2325	1870	148	1722	296	2018	0.14668	0.146607		0.9946	913.676	0.324184	913.352	0.648368	914	0.000709375	0.00426482
		0.2324	1871	148	1723	296	2019	0.146607	0.146607		0.9946	914.674	0.32633	914.347	0.65266	915	0.00071329	0.00426482
		0.2323	1871	149	1722	298	2020	0.147525	0.147525		0.9946	915.672	0.32849	915.343	0.65698	916	0.000717227	0.00426482
		0.2316	1871	150	1721	300	2021	0.148441	0.148441		0.9945	916.669	0.330663	916.339	0.661326	917	0.000721185	0.00436048
		0.2308	1871	151	1720	302	2022	0.149357	0.149357		0.9945	917.667	0.33285	917.334	0.665701	918	0.000725164	0.00436048
		0.23	1871	152	1719	304	2023	0.150272	0.150272		0.9944	918.665	0.335051	918.33	0.670103	919	0.000729165	0.00440219
		0.2298	1871	153	1718	306	2024	0.151186	0.151186		0.9943	919.663	0.337267	919.325	0.674533	920	0.000733188	0.00444433
		0.2289	1871	154	1717	308	2025	0.152099	0.151874		0.9943	920.661	0.339496	920.321	0.678992	921	0.000737233	0.00444433
		0.2284	1873	154	1719	308	2027	0.151949	0.151874		0.9942	921.658	0.341739	921.317	0.683478	922	0.0007413	0.00450119
		0.2267	1874	154	1720	308	2028	0.151874	0.151874		0.9942	922.656	0.343997	922.312	0.687994	923	0.000745389	0.00450119
		0.2266	1874	155	1719	310	2029	0.152785	0.152709		0.9941	923.654	0.346269	923.307	0.692538	924	0.0007495	0.00455884
		0.226	1875	155	1720	310	2030	0.152709	0.152709		0.9941	924.651	0.348556	924.303	0.697112	925	0.000753634	0.00455884
		0.2259	1875	156	1719	312	2031	0.153619	0.153619		0.994	925.649	0.350857	925.298	0.701714	926	0.000757791	0.00467655
		0.2248	1875	157	1718	314	2032	0.154528	0.154528		0.994	926.647	0.353173	926.294	0.706346	927	0.00076197	0.00467655
		0.2239	1876	158	1718	316	2034	0.155359	0.155359		0.994	927.644	0.355504	927.289	0.711008	928	0.000766172	0.00467655
		0.2236	1876	160	1716	320	2036	0.157171	0.157017		0.994	928.642	0.35785	928.284	0.7157	929	0.000770398	0.00467655
		0.2233	1877	160	1717	320	2037	0.157094	0.157017		0.994	929.64	0.360211	929.28	0.720421	930	0.000774646	0.00467655
		0.222	1878	160	1718	320	2038	0.157017	0.157017		0.994	930.637	0.362586	930.275	0.725173	931	0.000778918	0.00467655
		0.2219	1878	161	1717	322	2039	0.157921	0.157921		0.9939	931.635	0.364978	931.27	0.729955	932	0.000783214	0.00481293
		0.2217	1878	162	1716	324	2040	0.158824	0.158824		0.9939	932.633	0.367384	932.265	0.734768	933	0.000787533	0.00481293
		0.2213	1878	163	1715	326	2041	0.159726	0.159726		0.9939	933.63	0.369806	933.26	0.739612	934	0.000791876	0.00481293
		0.2207	1878	164	1714	328	2042	0.160627	0.160627		0.9937	934.628	0.372243	934.256	0.744487	935	0.000796243	0.00489056
		0.2195	1878	165	1713	330	2043	0.161527	0.161448		0.9937	935.625	0.374697	935.251	0.749393	936	0.000800634	0.00489056
		0.2189	1879	165	1714	330	2044	0.161448	0.161448		0.9935	936.623	0.377165	936.246	0.754331	937	0.000805049	0.00496955
		0.2183	1880	166	1714	332	2046	0.162268	0.162189		0.9935	937.62	0.37965	937.241	0.759301	938	0.000809489	0.00496955
		0.2181	1881	166	1715	332	2047	0.162189	0.162189		0.9935	938.618	0.382151	938.236	0.764302	939	0.000813953	0.00496955
		0.2172	1882	167	1715	334	2049	0.163006	0.163006		0.9934	939.615	0.384668	939.231	0.769336	940	0.000818442	0.00503374
		0.217	1882	168	1714	336	2050	0.163902	0.163902		0.9933	940.613	0.387201	940.226	0.774402	941	0.000822956	0.00506617
		0.2166	1882	170	1712	340	2052	0.165692	0.165692		0.9932	941.61	0.38975	941.22	0.779501	942	0.000827496	0.00511525
		0.216	1882	171	1711	342	2053	0.166585	0.166585		0.9932	942.608	0.392316	942.215	0.784633	943	0.00083206	0.00511525
		0.2158	1882	172	1710	344	2054	0.167478	0.167397		0.9931	943.605	0.394899	943.21	0.789797	944	0.00083665	0.00516484
		0.2156	1883	172	1711	344	2055	0.167397	0.167397		0.993	944.603	0.397498	944.205	0.794996	945	0.000841265	0.00521495
		0.2155	1885	173	1712	346	2058	0.168124	0.168043		0.993	945.6	0.400114	945.2	0.800227	946	0.000845906	0.00521495
		0.2152	1886	173	1713	346	2059	0.168043	0.168043		0.9929	946.597	0.402746	946.195	0.805493	947	0.000850573	0.00538587
		0.2146	1886	174	1712	348	2060	0.168932	0.168686		0.9929	947.595	0.405396	947.189	0.810793	948	0.000855267	0.00538587
		0.2141	1887	174	1713	348	2061	0.16885	0.168686		0.9929	948.592	0.408063	948.184	0.816127	949	0.000859986	0.00538587
		0.214	1889	174	1715	348	2063	0.168686	0.168686		0.9929	949.589	0.410748	949.179	0.821495	950	0.000864732	0.00538587
		0.2137	1889	175	1714	350	2064	0.169574	0.169574		0.9929	950.587	0.413449	950.173	0.826898	951	0.000869504	0.00538587
		0.2134	1889	176	1713	352	2065	0.17046	0.16972		0.9929	951.584	0.416168	951.168	0.832337	952	0.000874303	0.00538587
		0.2131	1890	176	1714	352	2066	0.170378	0.16972		0.9929	952.581	0.418905	952.162	0.83781	953	0.000879129	0.00538587
		0.2127	1891	176	1715	352	2067	0.170295	0.16972		0.9929	953.578	0.42166	953.157	0.84332	954	0.000883983	0.00538587
		0.2123	1893	176	1717	352	2069	0.17013	0.16972		0.9926	954.576	0.424432	954.151	0.848864	955	0.000888863	0.00563549
		0.2122	1895	176	1719	352	2071	0.169966	0.16972		0.9926	955.573	0.427223	955.146	0.854445	956	0.000893771	0.00563549
		0.2117	1896	176	1720	352	2072	0.169884	0.16972		0.9926	956.57	0.430031	956.14	0.860063	957	0.000898707	0.00563549
		0.2111	1897	176	1721	352	2073	0.169802	0.16972		0.9926	957.567	0.432858	957.134	0.865717	958	0.000903671	0.00563549
		0.2106	1898	176	1722	352	2074	0.16972	0.16972		0.9926	958.564	0.435704	958.129	0.871407	959	0.000908662	0.00563549
		0.2102	1898	177	1721	354	2075	0.170602	0.170602		0.9926	959.561	0.438567	959.123	0.877135	960	0.000913682	0.00563549
		0.2098	1898	178	1720	356	2076	0.171484	0.171401		0.9925	960.559	0.44145	960.117	0.8829	961	0.00091873	0.00587861
		0.2097	1899	178	1721	356	2077	0.171401	0.171401		0.9925	961.556	0.444351	961.111	0.888702	962	0.000923807	0.00587861
		0.2095	1899	179	1720	358	2078	0.172281	0.172281		0.9925	962.553	0.447271	962.105	0.894543	963	0.000928913	0.00587861
		0.2093	1900	180	1720	360	2080	0.173077	0.173077		0.9925	963.55	0.450211	963.1	0.900422	964	0.000934047	0.00587861
		0.2091	1900	181	1719	362	2081	0.173955	0.173871		0.9925	964.547	0.453169	964.094	0.906339	965	0.000939211	0.00587861
		0.2089	1901	181	1720	362	2082	0.173871	0.173871		0.9925	965.544	0.456147	965.088	0.912294	966	0.000944404	0.00587861
		0.2087	1901	183	1718	366	2084	0.175624	0.175371		0.9925	966.541	0.459144	966.082	0.918289	967	0.000949627	0.00587861
		0.2086	1902	183	1719	366	2085	0.17554	0.175371		0.9924	967.538	0.462161	967.076	0.924323	968	0.000954879	0.0060339
		0.2084	1903	183	1720	366	2086	0.175455	0.175371		0.9921	968.535	0.465198	968.07	0.930396	969	0.000960161	0.00609328
		0.2082	1904	183	1721	366	2087	0.175371	0.175371		0.9921	969.532	0.468255	969.063	0.93651	970	0.000965474	0.00609328
		0.2081	1904	184	1720	368	2088	0.176245	0.176245		0.9919	970.529	0.471331	970.057	0.942663	971	0.000970817	0.00619367
		0.2076	1905	185	1720	370	2090	0.177033	0.177033		0.9919	971.526	0.474428	971.051	0.948857	972	0.00097619	0.00619367
		0.2075	1905	186	1719	372	2091	0.177905	0.177566		0.9919	972.522	0.477545	972.045	0.955091	973	0.000981594	0.00619367
		0.2074	1907	186	1721	372	2093	0.177735	0.177566		0.9918	973.519	0.480683	973.039	0.961366	974	0.000987029	0.00629588
		0.2069	1908	186	1722	372	2094	0.17765	0.177566		0.9918	974.516	0.483841	974.032	0.967683	975	0.000992495	0.00629588
		0.2068	1909	186	1723	372	2095	0.177566	0.177566		0.9917	975.513	0.48702	975.026	0.974041	976	0.000997993	0.00642097
		0.2065	1909	187	1722	374	2096	0.178435	0.178435		0.9917	976.51	0.49022	976.02	0.980441	977	0.00100352	0.00642097
		0.2061	1909	188	1721	376	2097	0.179304	0.179218		0.9917	977.507	0.493441	977.013	0.986883	978	0.00100908	0.00642097
		0.2055	1910	188	1722	376	2098	0.179218	0.179218		0.9917	978.503	0.496684	978.007	0.993367	979	0.00101468	0.00642097
		0.2054	1911	189	1722	378	2100	0.18	0.18		0.9916	979.5	0.499947	979	0.999895	980	0.0010203	0.00665741
		0.2052	1911	190	1721	380	2101	0.180866	0.180866		0.9916	980.497	0.503233	979.994	1.00647	981	0.00102596	0.00665741
		0.2049	1911	191	1720	382	2102	0.181732	0.181645		0.9916	981.493	0.506539	980.987	1.01308	982	0.00103165	0.00665741
		0.2048	1912	191	1721	382	2103	0.181645	0.181645		0.9916	982.49	0.509868	981.98	1.01974	983	0.00103737	0.00665741
		0.2046	1912	192	1720	384	2104	0.18251	0.182423		0.9916	983.487	0.513219	982.974	1.02644	984	0.00104313	0.00665741
		0.2045	1913	192	1721	384	2105	0.182423	0.182423		0.9916	984.483	0.516592	983.967	1.03318	985	0.00104892	0.00665741
		0.2042	1914	193	1721	386	2107	0.183199	0.183199		0.9916	985.48	0.519987	984.96	1.03997	986	0.00105474	0.00665741
		0.2038	1914	194	1720	388	2108	0.184061	0.183886		0.9915	986.477	0.523405	985.953	1.04681	987	0.0010606	0.00685795
		0.2037	1915	194	1721	388	2109	0.183973	0.183886		0.9915	987.473	0.526845	986.946	1.05369	988	0.00106649	0.00685795
		0.2035	1916	194	1722	388	2110	0.183886	0.183886		0.9914	988.47	0.530308	987.939	1.06062	989	0.00107241	0.00694919
		0.2031	1916	195	1721	390	2111	0.184747	0.18431		0.9914	989.466	0.533794	988.932	1.06759	990	0.00107837	0.00694919
		0.203	1917	195	1722	390	2112	0.184659	0.18431		0.9913	990.463	0.537303	989.925	1.07461	991	0.00108437	0.00704176
		0.2028	1918	195	1723	390	2113	0.184572	0.18431		0.9913	991.459	0.540836	990.918	1.08167	992	0.0010904	0.00704176
		0.2027	1920	195	1725	390	2115	0.184397	0.18431		0.9912	992.456	0.544392	991.911	1.08878	993	0.00109646	0.00725501
		0.2026	1921	195	1726	390	2116	0.18431	0.18431		0.9912	993.452	0.547972	992.904	1.09594	994	0.00110256	0.00725501
		0.2023	1921	196	1725	392	2117	0.185168	0.185168		0.9912	994.448	0.551575	993.897	1.10315	995	0.00110869	0.00725501
		0.2022	1921	197	1724	394	2118	0.186025	0.185849		0.9912	995.445	0.555203	994.89	1.11041	996	0.00111486	0.00725501
		0.2014	1922	197	1725	394	2119	0.185937	0.185849		0.9912	996.441	0.558854	995.882	1.11771	997	0.00112107	0.00725501
		0.2009	1923	197	1726	394	2120	0.185849	0.185849		0.9912	997.437	0.56253	996.875	1.12506	998	0.00112732	0.00725501
		0.2007	1923	198	1725	396	2121	0.186704	0.186265		0.9912	998.434	0.566231	997.868	1.13246	999	0.0011336	0.00725501
		0.2005	1925	198	1727	396	2123	0.186528	0.186265		0.9911	999.43	0.569956	998.86	1.13991	1000	0.00113991	0.00755042
		0.1999	1926	198	1728	396	2124	0.186441	0.186265		0.9911	1000.43	0.573706	999.853	1.14741	1001	0.00114627	0.00755042
		0.1998	1927	198	1729	396	2125	0.186353	0.186265		0.9911	1001.42	0.577482	1000.85	1.15496	1002	0.00115266	0.00755042
		0.1996	1928	198	1730	396	2126	0.186265	0.186265		0.9911	1002.42	0.581282	1001.84	1.16256	1003	0.00115909	0.00755042
		0.1995	1928	199	1729	398	2127	0.187118	0.186679		0.9911	1003.41	0.585108	1002.83	1.17022	1004	0.00116555	0.00755042
		0.1985	1929	199	1730	398	2128	0.18703	0.186679		0.991	1004.41	0.58896	1003.82	1.17792	1005	0.00117206	0.00775466
		0.1976	1931	199	1732	398	2130	0.186854	0.186679		0.991	1005.41	0.592837	1004.81	1.18567	1006	0.0011786	0.00775466
		0.1974	1933	199	1734	398	2132	0.186679	0.186679		0.991	1006.4	0.59674	1005.81	1.19348	1007	0.00118518	0.00775466
		0.1969	1933	200	1733	400	2133	0.187529	0.187529		0.9909	1007.4	0.60067	1006.8	1.20134	1008	0.00119181	0.00785904
		0.1967	1933	201	1732	402	2134	0.188379	0.188379		0.9908	1008.4	0.604626	1007.79	1.20925	1009	0.00119847	0.00793834
		0.1965	1933	202	1731	404	2135	0.189227	0.188962		0.9908	1009.39	0.608608	1008.78	1.21722	1010	0.00120516	0.00793834
		0.1963	1934	202	1732	404	2136	0.189139	0.188962		0.9907	1010.39	0.612617	1009.77	1.22523	1011	0.0012119	0.00807245
		0.1962	1935	202	1733	404	2137	0.18905	0.188962		0.9907	1011.38	0.616654	1010.77	1.23331	1012	0.00121868	0.00807245
		0.196	1936	202	1734	404	2138	0.188962	0.188962		0.9907	1012.38	0.620717	1011.76	1.24143	1013	0.0012255	0.00807245
		0.1958	1936	203	1733	406	2139	0.189808	0.189808		0.9906	1013.38	0.624808	1012.75	1.24962	1014	0.00123236	0.00818152
		0.1956	1937	204	1733	408	2141	0.190565	0.190476		0.9903	1014.37	0.628926	1013.74	1.25785	1015	0.00123926	0.00840453
		0.1951	1938	204	1734	408	2142	0.190476	0.190476		0.9903	1015.37	0.633072	1014.73	1.26614	1016	0.00124621	0.00840453
		0.1949	1938	205	1733	410	2143	0.191321	0.191321		0.9903	1016.36	0.637246	1015.73	1.27449	1017	0.00125319	0.00840453
		0.1946	1938	206	1732	412	2144	0.192164	0.191896		0.9903	1017.36	0.641449	1016.72	1.2829	1018	0.00126021	0.00840453
		0.1944	1939	206	1733	412	2145	0.192075	0.191896		0.9903	1018.35	0.645679	1017.71	1.29136	1019	0.00126728	0.00840453
		0.1942	1940	206	1734	412	2146	0.191985	0.191896		0.9903	1019.35	0.649939	1018.7	1.29988	1020	0.00127439	0.00840453
		0.1939	1941	206	1735	412	2147	0.191896	0.191896		0.9903	1020.35	0.654227	1019.69	1.30845	1021	0.00128154	0.00840453
		0.1938	1941	207	1734	414	2148	0.192737	0.192648		0.9902	1021.34	0.658544	1020.68	1.31709	1022	0.00128874	0.0086927
		0.1937	1942	207	1735	414	2149	0.192648	0.192648		0.9902	1022.34	0.66289	1021.67	1.32578	1023	0.00129597	0.0086927
		0.1935	1942	208	1734	416	2150	0.193488	0.192682		0.9902	1023.33	0.667266	1022.67	1.33453	1024	0.00130325	0.0086927
		0.1928	1943	208	1735	416	2151	0.193398	0.192682		0.9901	1024.33	0.671671	1023.66	1.34334	1025	0.00131058	0.00887077
		0.1924	1945	208	1737	416	2153	0.193219	0.192682		0.9901	1025.32	0.676107	1024.65	1.35221	1026	0.00131795	0.00887077
		0.1922	1946	208	1738	416	2154	0.193129	0.192682		0.9901	1026.32	0.680572	1025.64	1.36114	1027	0.00132536	0.00887077
		0.1921	1947	208	1739	416	2155	0.193039	0.192682		0.9899	1027.31	0.685068	1026.63	1.37014	1028	0.00133282	0.0089917
		0.192	1948	208	1740	416	2156	0.19295	0.192682		0.9898	1028.31	0.689595	1027.62	1.37919	1029	0.00134032	0.00905284
		0.1918	1949	208	1741	416	2157	0.19286	0.192682		0.9897	1029.31	0.694152	1028.61	1.3883	1030	0.00134787	0.009239
		0.1914	1950	208	1742	416	2158	0.192771	0.192682		0.9897	1030.3	0.69874	1029.6	1.39748	1031	0.00135546	0.009239
		0.1913	1951	208	1743	416	2159	0.192682	0.192682		0.9897	1031.3	0.70336	1030.59	1.40672	1032	0.0013631	0.009239
		0.1911	1951	209	1742	418	2160	0.193519	0.19325		0.9897	1032.29	0.708011	1031.58	1.41602	1033	0.00137079	0.009239
		0.1908	1952	209	1743	418	2161	0.193429	0.19325		0.9897	1033.29	0.712693	1032.57	1.42539	1034	0.00137852	0.009239
		0.1905	1953	209	1744	418	2162	0.19334	0.19325		0.9896	1034.28	0.717408	1033.57	1.43482	1035	0.0013863	0.00942936
		0.1903	1954	209	1745	418	2163	0.19325	0.19325		0.9895	1035.28	0.722155	1034.56	1.44431	1036	0.00139412	0.00952614
		0.19	1954	210	1744	420	2164	0.194085	0.193548		0.9895	1036.27	0.726934	1035.55	1.45387	1037	0.00140199	0.00952614
		0.1898	1955	210	1745	420	2165	0.193995	0.193548		0.9894	1037.27	0.731746	1036.54	1.46349	1038	0.00140992	0.00965687
		0.1896	1956	210	1746	420	2166	0.193906	0.193548		0.9894	1038.26	0.736591	1037.53	1.47318	1039	0.00141788	0.00965687
		0.1886	1957	210	1747	420	2167	0.193816	0.193548		0.9892	1039.26	0.741469	1038.52	1.48294	1040	0.0014259	0.00978957
		0.1885	1958	210	1748	420	2168	0.193727	0.193548		0.9892	1040.25	0.746381	1039.51	1.49276	1041	0.00143397	0.00978957
		0.1877	1959	210	1749	420	2169	0.193638	0.193548		0.9889	1041.25	0.751326	1040.5	1.50265	1042	0.00144208	0.00995824
		0.1876	1960	210	1750	420	2170	0.193548	0.193548		0.9889	1042.24	0.756305	1041.49	1.51261	1043	0.00145025	0.00995824
		0.1874	1960	211	1749	422	2171	0.19438	0.194291		0.9889	1043.24	0.761319	1042.48	1.52264	1044	0.00145846	0.00995824
		0.1873	1961	211	1750	422	2172	0.194291	0.194291		0.9888	1044.23	0.766366	1043.47	1.53273	1045	0.00146673	0.0101649
		0.1872	1961	212	1749	424	2173	0.195122	0.195032		0.9888	1045.23	0.771449	1044.46	1.5429	1046	0.00147505	0.0101649
		0.1867	1962	212	1750	424	2174	0.195032	0.195032		0.9888	1046.22	0.776566	1045.45	1.55313	1047	0.00148341	0.0101649
		0.1863	1962	213	1749	426	2175	0.195862	0.195862		0.9887	1047.22	0.781719	1046.44	1.56344	1048	0.00149183	0.0103762
		0.1861	1962	214	1748	428	2176	0.196691	0.19624		0.9887	1048.21	0.786907	1047.43	1.57381	1049	0.0015003	0.0103762
		0.1857	1963	214	1749	428	2177	0.196601	0.19624		0.9887	1049.21	0.792131	1048.42	1.58426	1050	0.00150882	0.0103762
		0.1856	1964	214	1750	428	2178	0.196511	0.19624		0.9886	1050.2	0.79739	1049.41	1.59478	1051	0.00151739	0.0105197
		0.1853	1965	214	1751	428	2179	0.19642	0.19624		0.9884	1051.2	0.802687	1050.39	1.60537	1052	0.00152602	0.0106654
		0.1852	1966	214	1752	428	2180	0.19633	0.19624		0.9884	1052.19	0.808019	1051.38	1.61604	1053	0.0015347	0.0106654
		0.1843	1967	214	1753	428	2181	0.19624	0.19624		0.9884	1053.19	0.813389	1052.37	1.62678	1054	0.00154343	0.0106654
		0.1836	1967	216	1751	432	2183	0.197893	0.197893		0.9882	1054.18	0.818795	1053.36	1.63759	1055	0.00155222	0.0108133
		0.1835	1968	218	1750	436	2186	0.199451	0.199269		0.9881	1055.18	0.82424	1054.35	1.64848	1056	0.00156106	0.0109634
		0.1834	1969	218	1751	436	2187	0.19936	0.199269		0.9881	1056.17	0.829721	1055.34	1.65944	1057	0.00156996	0.0109634
		0.1827	1970	218	1752	436	2188	0.199269	0.199269		0.9881	1057.16	0.835241	1056.33	1.67048	1058	0.00157891	0.0109634
		0.1824	1970	219	1751	438	2189	0.200091	0.2		0.9879	1058.16	0.840799	1057.32	1.6816	1059	0.00158791	0.0111543
		0.1823	1971	219	1752	438	2190	0.2	0.2		0.9879	1059.15	0.846395	1058.31	1.69279	1060	0.00159697	0.0111543
		0.182	1971	220	1751	440	2191	0.200822	0.200822		0.9878	1060.15	0.852031	1059.3	1.70406	1061	0.00160609	0.0112705
		0.1815	1972	222	1750	444	2194	0.20237	0.20237		0.9877	1061.14	0.857705	1060.28	1.71541	1062	0.00161526	0.0113881
		0.1814	1972	223	1749	446	2195	0.203189	0.203097		0.9877	1062.14	0.863419	1061.27	1.72684	1063	0.00162449	0.0113881
		0.1813	1973	223	1750	446	2196	0.203097	0.203097		0.9876	1063.13	0.869172	1062.26	1.73834	1064	0.00163378	0.0115871
		0.1812	1974	224	1750	448	2198	0.203822	0.203359		0.9876	1064.13	0.874966	1063.25	1.74993	1065	0.00164313	0.0115871
		0.181	1975	224	1751	448	2199	0.203729	0.203359		0.9876	1065.12	0.8808	1064.24	1.7616	1066	0.00165253	0.0115871
		0.1805	1976	224	1752	448	2200	0.203636	0.203359		0.9875	1066.11	0.886674	1065.23	1.77335	1067	0.00166199	0.0117489
		0.1804	1978	224	1754	448	2202	0.203451	0.203359		0.9873	1067.11	0.89259	1066.21	1.78518	1068	0.00167152	0.011872
		0.1799	1979	224	1755	448	2203	0.203359	0.203359		0.9873	1068.1	0.898546	1067.2	1.79709	1069	0.0016811	0.011872
		0.1798	1979	225	1754	450	2204	0.204174	0.204174		0.9872	1069.1	0.904544	1068.19	1.80909	1070	0.00169074	0.0119964
		0.1796	1979	226	1753	452	2205	0.204989	0.20471		0.987	1070.09	0.910585	1069.18	1.82117	1071	0.00170044	0.0121645
		0.1793	1980	226	1754	452	2206	0.204896	0.20471		0.987	1071.08	0.916667	1070.17	1.83333	1072	0.0017102	0.0121645
		0.1792	1981	226	1755	452	2207	0.204803	0.20471		0.987	1072.08	0.922792	1071.15	1.84558	1073	0.00172002	0.0121645
		0.179	1982	226	1756	452	2208	0.20471	0.20471		0.9868	1073.07	0.928959	1072.14	1.85792	1074	0.00172991	0.0123783
		0.1789	1984	227	1757	454	2211	0.205337	0.204874		0.9868	1074.06	0.93517	1073.13	1.87034	1075	0.00173985	0.0123783
		0.1786	1986	227	1759	454	2213	0.205151	0.204874		0.9866	1075.06	0.941424	1074.12	1.88285	1076	0.00174986	0.0125085
		0.1785	1987	227	1760	454	2214	0.205059	0.204874		0.9865	1076.05	0.947722	1075.1	1.89544	1077	0.00175993	0.0125961
		0.1777	1988	227	1761	454	2215	0.204966	0.204874		0.9863	1077.05	0.954064	1076.09	1.90813	1078	0.00177006	0.0127288
		0.1774	1989	227	1762	454	2216	0.204874	0.204874		0.9863	1078.04	0.960451	1077.08	1.9209	1079	0.00178026	0.0127288
		0.1772	1989	228	1761	456	2217	0.205683	0.205036		0.9861	1079.03	0.966883	1078.07	1.93377	1080	0.00179052	0.012863
		0.1771	1990	228	1762	456	2218	0.205591	0.205036		0.986	1080.03	0.973359	1079.05	1.94672	1081	0.00180085	0.0129534
		0.177	1991	228	1763	456	2219	0.205498	0.205036		0.9858	1081.02	0.979882	1080.04	1.95976	1082	0.00181124	0.0130444
		0.1768	1993	228	1765	456	2221	0.205313	0.205036		0.9856	1082.01	0.98645	1081.03	1.9729	1083	0.0018217	0.0131361
		0.1767	1994	228	1766	456	2222	0.205221	0.205036		0.9853	1083.01	0.993064	1082.01	1.98613	1084	0.00183222	0.013275
		0.1766	1995	228	1767	456	2223	0.205128	0.205036		0.9853	1084	0.999725	1083	1.99945	1085	0.00184281	0.013275
		0.1759	1996	228	1768	456	2224	0.205036	0.205036		0.9849	1084.99	1.00643	1083.99	2.01286	1086	0.00185347	0.0134627
		0.1757	1996	229	1767	458	2225	0.205843	0.20575		0.9849	1085.99	1.01319	1084.97	2.02638	1087	0.00186419	0.0134627
		0.1754	1997	229	1768	458	2226	0.20575	0.20575		0.9848	1086.98	1.01999	1085.96	2.03998	1088	0.00187498	0.0136532
		0.1751	1997	230	1767	460	2227	0.206556	0.206556		0.9848	1087.97	1.02684	1086.95	2.05368	1089	0.00188584	0.0136532
		0.175	1997	231	1766	462	2228	0.207361	0.207361		0.9845	1088.97	1.03374	1087.93	2.06748	1090	0.00189677	0.013798
		0.1749	1997	232	1765	464	2229	0.208165	0.208072		0.9844	1089.96	1.04069	1088.92	2.08138	1091	0.00190777	0.0139445
		0.1747	1998	232	1766	464	2230	0.208072	0.208072		0.9844	1090.95	1.04768	1089.9	2.09537	1092	0.00191884	0.0139445
		0.1746	1998	233	1765	466	2231	0.208875	0.208594		0.9842	1091.95	1.05473	1090.89	2.10946	1093	0.00192997	0.0140927
		0.1745	1999	233	1766	466	2232	0.208781	0.208594		0.9839	1092.94	1.06183	1091.88	2.12365	1094	0.00194118	0.0142426
		0.1742	2000	233	1767	466	2233	0.208688	0.208594		0.9839	1093.93	1.06897	1092.86	2.13795	1095	0.00195246	0.0142426
		0.1741	2001	233	1768	466	2234	0.208594	0.208594		0.9837	1094.92	1.07617	1093.85	2.15234	1096	0.00196382	0.0144451
		0.1734	2001	234	1767	468	2235	0.209396	0.208835		0.9837	1095.92	1.08342	1094.83	2.16684	1097	0.00197524	0.0144451
		0.1733	2002	234	1768	468	2236	0.209302	0.208835		0.9835	1096.91	1.09072	1095.82	2.18144	1098	0.00198674	0.0145991
		0.1728	2003	234	1769	468	2237	0.209209	0.208835		0.9832	1097.9	1.09807	1096.8	2.19614	1099	0.00199831	0.0147027
		0.1727	2004	234	1770	468	2238	0.209115	0.208835		0.983	1098.89	1.10547	1097.79	2.21095	1100	0.00200995	0.0148596
		0.1722	2005	234	1771	468	2239	0.209022	0.208835		0.983	1099.89	1.11293	1098.77	2.22586	1101	0.00202167	0.0148596
		0.172	2006	234	1772	468	2240	0.208929	0.208835		0.9827	1100.88	1.12044	1099.76	2.24088	1102	0.00203346	0.0150183
		0.1715	2007	234	1773	468	2241	0.208835	0.208835		0.9825	1101.87	1.128	1100.74	2.256	1103	0.00204533	0.0151252
		0.1709	2008	235	1773	470	2243	0.209541	0.209447		0.9824	1102.86	1.13562	1101.73	2.27124	1104	0.00205728	0.0152328
		0.1707	2009	235	1774	470	2244	0.209447	0.209447		0.9823	1103.86	1.14329	1102.71	2.28658	1105	0.0020693	0.0153959
		0.1705	2009	237	1772	474	2246	0.211042	0.210854		0.9823	1104.85	1.15101	1103.7	2.30203	1106	0.0020814	0.0153959
		0.1701	2010	237	1773	474	2247	0.210948	0.210854		0.9821	1105.84	1.15879	1104.68	2.31759	1107	0.00209358	0.0156162
		0.1698	2011	237	1774	474	2248	0.210854	0.210854		0.9821	1106.83	1.16663	1105.67	2.33326	1108	0.00210583	0.0156162
		0.1697	2012	238	1774	476	2250	0.211556	0.211556		0.982	1107.83	1.17452	1106.65	2.34904	1109	0.00211816	0.0158964
		0.1695	2013	239	1774	478	2252	0.212256	0.212256		0.982	1108.82	1.18247	1107.64	2.36494	1110	0.00213058	0.0158964
		0.1691	2013	240	1773	480	2253	0.213049	0.21286		0.982	1109.81	1.19048	1108.62	2.38095	1111	0.00214307	0.0158964
		0.1689	2014	240	1774	480	2254	0.212955	0.21286		0.9819	1110.8	1.19854	1109.6	2.39708	1112	0.00215564	0.0161245
		0.1688	2015	240	1775	480	2255	0.21286	0.21286		0.9817	1111.79	1.20666	1110.59	2.41331	1113	0.0021683	0.0162398
		0.1686	2015	241	1774	482	2256	0.213652	0.213652		0.9816	1112.79	1.21484	1111.57	2.42967	1114	0.00218103	0.0164145
		0.1684	2015	242	1773	484	2257	0.214444	0.214349		0.9816	1113.78	1.22307	1112.55	2.44614	1115	0.00219385	0.0164145
		0.1682	2016	242	1774	484	2258	0.214349	0.214349		0.9813	1114.77	1.23137	1113.54	2.46274	1116	0.00220675	0.0167102
		0.1678	2016	243	1773	486	2259	0.215139	0.215044		0.9813	1115.76	1.23972	1114.52	2.47945	1117	0.00221974	0.0167102
		0.1673	2017	243	1774	486	2260	0.215044	0.215044		0.9813	1116.75	1.24814	1115.5	2.49628	1118	0.0022328	0.0167102
		0.1671	2017	245	1772	490	2262	0.216622	0.216622		0.9808	1117.74	1.25661	1116.49	2.51323	1119	0.00224596	0.0169509
		0.1668	2017	246	1771	492	2263	0.217411	0.217411		0.9807	1118.73	1.26515	1117.47	2.5303	1120	0.0022592	0.0170726
		0.1667	2018	247	1771	494	2265	0.218102	0.217813		0.9802	1119.73	1.27375	1118.45	2.54749	1121	0.00227252	0.0171953
		0.1665	2019	247	1772	494	2266	0.218005	0.217813		0.9801	1120.72	1.28241	1119.44	2.56481	1122	0.00228593	0.0173189
		0.1662	2020	247	1773	494	2267	0.217909	0.217813		0.9796	1121.71	1.29113	1120.42	2.58226	1123	0.00229943	0.0175061
		0.1657	2021	247	1774	494	2268	0.217813	0.217813		0.9796	1122.7	1.29991	1121.4	2.59983	1124	0.00231301	0.0175061
		0.1656	2021	248	1773	496	2269	0.218599	0.218039		0.9794	1123.69	1.30876	1122.38	2.61752	1125	0.00232669	0.0177591
		0.1652	2022	248	1774	496	2270	0.218502	0.218039		0.9794	1124.68	1.31767	1123.36	2.63534	1126	0.00234045	0.0177591
		0.1651	2022	249	1773	498	2271	0.219287	0.218039		0.9787	1125.67	1.32665	1124.35	2.6533	1127	0.0023543	0.0180809
		0.1648	2023	249	1774	498	2272	0.21919	0.218039		0.9787	1126.66	1.33569	1125.33	2.67138	1128	0.00236824	0.0180809
		0.1646	2024	249	1775	498	2273	0.219094	0.218039		0.9787	1127.66	1.34479	1126.31	2.68959	1129	0.00238227	0.0180809
		0.1643	2025	249	1776	498	2274	0.218997	0.218039		0.9786	1128.65	1.35397	1127.29	2.70793	1130	0.0023964	0.0183428
		0.1641	2027	249	1778	498	2276	0.218805	0.218039		0.9781	1129.64	1.3632	1128.27	2.72641	1131	0.00241062	0.0186088
		0.164	2028	249	1779	498	2277	0.218709	0.218039		0.9781	1130.63	1.37251	1129.25	2.74502	1132	0.00242493	0.0186088
		0.1639	2029	249	1780	498	2278	0.218613	0.218039		0.9781	1131.62	1.38188	1130.24	2.76376	1133	0.00243933	0.0186088
		0.1637	2031	249	1782	498	2280	0.218421	0.218039		0.978	1132.61	1.39132	1131.22	2.78264	1134	0.00245383	0.018879
		0.1636	2032	249	1783	498	2281	0.218325	0.218039		0.9777	1133.6	1.40083	1132.2	2.80165	1135	0.00246842	0.0190156
		0.1633	2034	249	1785	498	2283	0.218134	0.218039		0.9776	1134.59	1.4104	1133.18	2.82081	1136	0.0024831	0.0191533
		0.1631	2035	249	1786	498	2284	0.218039	0.218039		0.9773	1135.58	1.42005	1134.16	2.8401	1137	0.00249789	0.0194319
		0.163	2036	250	1786	500	2286	0.218723	0.218341		0.9773	1136.57	1.42977	1135.14	2.85953	1138	0.00251277	0.0194319
		0.1629	2037	250	1787	500	2287	0.218627	0.218341		0.9773	1137.56	1.43955	1136.12	2.8791	1139	0.00252775	0.0194319
		0.1628	2038	250	1788	500	2288	0.218531	0.218341		0.9772	1138.55	1.44941	1137.1	2.89882	1140	0.00254282	0.0197149
		0.1627	2039	250	1789	500	2289	0.218436	0.218341		0.9769	1139.54	1.45934	1138.08	2.91868	1141	0.002558	0.019858
		0.1625	2040	250	1790	500	2290	0.218341	0.218341		0.9768	1140.53	1.46934	1139.06	2.93868	1142	0.00257327	0.0201476
		0.1623	2040	252	1788	504	2292	0.219895	0.219035		0.9768	1141.52	1.47941	1140.04	2.95883	1143	0.00258865	0.0201476
		0.1619	2041	252	1789	504	2293	0.219799	0.219035		0.9768	1142.51	1.48956	1141.02	2.97912	1144	0.00260413	0.0201476
		0.1618	2042	252	1790	504	2294	0.219704	0.219035		0.9765	1143.5	1.49978	1142	2.99956	1145	0.00261971	0.0205159
		0.1617	2043	252	1791	504	2295	0.219608	0.219035		0.9765	1144.49	1.51008	1142.98	3.02015	1146	0.00263539	0.0205159
		0.1616	2044	252	1792	504	2296	0.219512	0.219035		0.9764	1145.48	1.52045	1143.96	3.04089	1147	0.00265117	0.0207404
		0.1615	2045	252	1793	504	2297	0.219417	0.219035		0.9761	1146.47	1.53089	1144.94	3.06179	1148	0.00266706	0.0208914
		0.1612	2046	252	1794	504	2298	0.219321	0.219035		0.9759	1147.46	1.54141	1145.92	3.08283	1149	0.00268305	0.0210437
		0.161	2047	252	1795	504	2299	0.219226	0.219035		0.9757	1148.45	1.55201	1146.9	3.10403	1150	0.00269915	0.0212743
		0.1609	2048	252	1796	504	2300	0.21913	0.219035		0.9757	1149.44	1.56269	1147.87	3.12538	1151	0.00271536	0.0212743
		0.1608	2049	252	1797	504	2301	0.219035	0.219035		0.9755	1150.43	1.57344	1148.85	3.14689	1152	0.00273167	0.0215076
		0.1607	2050	253	1797	506	2303	0.219713	0.219713		0.9754	1151.42	1.58428	1149.83	3.16855	1153	0.00274809	0.0217436
		0.1605	2050	254	1796	508	2304	0.220486	0.220104		0.9754	1152.4	1.59519	1150.81	3.19037	1154	0.00276462	0.0217436
		0.1604	2051	254	1797	508	2305	0.22039	0.220104		0.9753	1153.39	1.60618	1151.79	3.21236	1155	0.00278126	0.0219824
		0.1601	2053	254	1799	508	2307	0.220199	0.220104		0.9749	1154.38	1.61725	1152.77	3.2345	1156	0.00279801	0.0221431
		0.16	2054	254	1800	508	2308	0.220104	0.220104		0.9748	1155.37	1.6284	1153.74	3.2568	1157	0.00281487	0.0223051
		0.1597	2054	255	1799	510	2309	0.220875	0.220875		0.9745	1156.36	1.63964	1154.72	3.27927	1158	0.00283184	0.0224683
		0.1594	2054	256	1798	512	2310	0.221645	0.221549		0.9744	1157.35	1.65095	1155.7	3.30191	1159	0.00284893	0.0227155
		0.1592	2055	256	1799	512	2311	0.221549	0.221549		0.9744	1158.34	1.66235	1156.68	3.3247	1160	0.00286612	0.0227155
		0.1591	2056	257	1799	514	2313	0.222222	0.222222		0.9742	1159.33	1.67383	1157.65	3.34767	1161	0.00288344	0.0229656
		0.1589	2057	258	1799	516	2315	0.222894	0.222894		0.974	1160.31	1.6854	1158.63	3.3708	1162	0.00290086	0.023134
		0.1588	2057	259	1798	518	2316	0.223661	0.223661		0.9739	1161.3	1.69705	1159.61	3.39411	1163	0.00291841	0.0233037
		0.1587	2057	260	1797	520	2317	0.224428	0.224428		0.9738	1162.29	1.70879	1160.58	3.41758	1164	0.00293607	0.0234746
		0.1585	2057	261	1796	522	2318	0.225194	0.225194		0.9735	1163.28	1.72061	1161.56	3.44123	1165	0.00295384	0.0237336
		0.1583	2057	262	1795	524	2319	0.225959	0.225959		0.9735	1164.27	1.73252	1162.53	3.46505	1166	0.00297174	0.0237336
		0.1582	2057	263	1794	526	2320	0.226724	0.226724		0.9732	1165.26	1.74452	1163.51	3.48905	1167	0.00298976	0.0239956
		0.158	2059	265	1794	530	2324	0.228055	0.227957		0.973	1166.24	1.75661	1164.49	3.51322	1168	0.00300789	0.024172
		0.1579	2060	265	1795	530	2325	0.227957	0.227957		0.9729	1167.23	1.76878	1165.46	3.53757	1169	0.00302615	0.0243497
		0.1578	2060	267	1793	534	2327	0.22948	0.22948		0.9728	1168.22	1.78105	1166.44	3.5621	1170	0.00304453	0.0245288
		0.1576	2061	268	1793	536	2329	0.230142	0.230142		0.9726	1169.21	1.7934	1167.41	3.58681	1171	0.00306303	0.0247094
		0.1573	2061	270	1791	540	2331	0.23166	0.231164		0.9721	1170.19	1.80585	1168.39	3.6117	1172	0.00308165	0.0248913
		0.1572	2062	270	1792	540	2332	0.231561	0.231164		0.9717	1171.18	1.81839	1169.36	3.63677	1173	0.0031004	0.0250746
		0.157	2063	270	1793	540	2333	0.231462	0.231164		0.9716	1172.17	1.83102	1170.34	3.66203	1174	0.00311928	0.0252593
		0.1568	2064	270	1794	540	2334	0.231362	0.231164		0.9713	1173.16	1.84374	1171.31	3.68748	1175	0.00313828	0.0254455
		0.1566	2065	270	1795	540	2335	0.231263	0.231164		0.9712	1174.14	1.85655	1172.29	3.71311	1176	0.00315741	0.0256332
		0.1565	2066	270	1796	540	2336	0.231164	0.231164		0.9711	1175.13	1.86947	1173.26	3.73893	1177	0.00317666	0.0258222
		0.1563	2066	271	1795	542	2337	0.231921	0.231921		0.9709	1176.12	1.88247	1174.24	3.76494	1178	0.00319605	0.0262048
		0.156	2066	272	1794	544	2338	0.232678	0.232678		0.9709	1177.1	1.89557	1175.21	3.79115	1179	0.00321556	0.0262048
		0.1558	2066	273	1793	546	2339	0.233433	0.233433		0.9709	1178.09	1.90877	1176.18	3.81755	1180	0.00323521	0.0262048
		0.1557	2067	274	1793	548	2341	0.234088	0.233988		0.9705	1179.08	1.92207	1177.16	3.84414	1181	0.00325499	0.0265934
		0.1556	2068	274	1794	548	2342	0.233988	0.233988		0.9702	1180.06	1.93547	1178.13	3.87093	1182	0.0032749	0.0267899
		0.1551	2068	275	1793	550	2343	0.234742	0.234742		0.97	1181.05	1.94896	1179.1	3.89792	1183	0.00329494	0.027288
		0.155	2068	277	1791	554	2345	0.236247	0.236247		0.97	1182.04	1.96255	1180.07	3.92511	1184	0.00331512	0.027288
		0.1549	2068	278	1790	556	2346	0.236999	0.236999		0.97	1183.02	1.97625	1181.05	3.9525	1185	0.00333544	0.027288
		0.1548	2068	279	1789	558	2347	0.23775	0.23775		0.97	1184.01	1.99004	1182.02	3.98009	1186	0.00335589	0.027288
		0.1547	2068	280	1788	560	2348	0.238501	0.238298		0.9695	1185	2.00394	1182.99	4.00788	1187	0.00337648	0.0280017
		0.1546	2069	280	1789	560	2349	0.238399	0.238298		0.9695	1185.98	2.01794	1183.96	4.03589	1188	0.00339721	0.0280017
		0.1545	2070	280	1790	560	2350	0.238298	0.238298		0.9695	1186.97	2.03205	1184.94	4.06409	1189	0.00341808	0.0280017
		0.1543	2072	281	1791	562	2353	0.238844	0.238844		0.9692	1187.95	2.04626	1185.91	4.09251	1190	0.00343909	0.0284183
		0.1542	2072	282	1790	564	2354	0.239592	0.239592		0.9689	1188.94	2.06057	1186.88	4.12114	1191	0.00346024	0.028629
		0.154	2072	283	1789	566	2355	0.24034	0.24034		0.9687	1189.93	2.07499	1187.85	4.14998	1192	0.00348153	0.0288413
		0.1539	2072	284	1788	568	2356	0.241087	0.240576		0.9683	1190.91	2.08952	1188.82	4.17904	1193	0.00350297	0.0290553
		0.1537	2073	284	1789	568	2357	0.240984	0.240576		0.9679	1191.9	2.10415	1189.79	4.20831	1194	0.00352455	0.029271
		0.1536	2074	284	1790	568	2358	0.240882	0.240576		0.9677	1192.88	2.1189	1190.76	4.2378	1195	0.00354627	0.0295976
		0.1534	2075	284	1791	568	2359	0.24078	0.240576		0.9677	1193.87	2.13375	1191.73	4.26751	1196	0.00356815	0.0295976
		0.1533	2076	284	1792	568	2360	0.240678	0.240576		0.9671	1194.85	2.14872	1192.7	4.29743	1197	0.00359017	0.029928
		0.1531	2077	284	1793	568	2361	0.240576	0.240576		0.9666	1195.84	2.16379	1193.67	4.32758	1198	0.00361234	0.0301504
		0.153	2078	285	1793	570	2363	0.241219	0.241015		0.9665	1196.82	2.17898	1194.64	4.35796	1199	0.00363466	0.0310574
		0.1528	2080	285	1795	570	2365	0.241015	0.241015		0.9665	1197.81	2.19428	1195.61	4.38856	1200	0.00365713	0.0310574
		0.1527	2081	286	1795	572	2367	0.241656	0.241656		0.9665	1198.79	2.20969	1196.58	4.41939	1201	0.00367976	0.0310574
		0.1526	2081	287	1794	574	2368	0.242399	0.242399		0.9665	1199.77	2.22522	1197.55	4.45044	1202	0.00370253	0.0310574
		0.1525	2083	288	1795	576	2371	0.242935	0.242731		0.9665	1200.76	2.24087	1198.52	4.48173	1203	0.00372546	0.0310574
		0.1524	2084	288	1796	576	2372	0.242833	0.242731		0.9665	1201.74	2.25663	1199.49	4.51325	1204	0.00374855	0.0310574
		0.1523	2085	288	1797	576	2373	0.242731	0.242731		0.9665	1202.73	2.27251	1200.45	4.54501	1205	0.00377179	0.0310574
		0.1521	2085	290	1795	580	2375	0.244211	0.244211		0.9659	1203.71	2.2885	1201.42	4.577	1206	0.00379519	0.0321118
		0.152	2086	291	1795	582	2377	0.244846	0.244538		0.9659	1204.7	2.30462	1202.39	4.60924	1207	0.00381875	0.0321118
		0.1518	2088	291	1797	582	2379	0.244641	0.244538		0.9656	1205.68	2.32085	1203.36	4.64171	1208	0.00384247	0.0324715
		0.1517	2089	291	1798	582	2380	0.244538	0.244538		0.9653	1206.66	2.33721	1204.33	4.67442	1209	0.00386635	0.0327136
		0.1516	2089	292	1797	584	2381	0.245275	0.245275		0.9651	1207.65	2.35369	1205.29	4.70738	1210	0.0038904	0.0329575
		0.1514	2089	293	1796	586	2382	0.246012	0.246012		0.9647	1208.63	2.37029	1206.26	4.74058	1211	0.0039146	0.0332034
		0.1513	2089	295	1794	590	2384	0.247483	0.247483		0.9646	1209.61	2.38702	1207.23	4.77403	1212	0.00393897	0.0334511
		0.1512	2090	296	1794	592	2386	0.248114	0.247699		0.9645	1210.6	2.40387	1208.19	4.80773	1213	0.00396351	0.0337008
		0.1511	2091	296	1795	592	2387	0.24801	0.247699		0.9641	1211.58	2.42084	1209.16	4.84169	1214	0.00398821	0.0339523
		0.151	2092	296	1796	592	2388	0.247906	0.247699		0.964	1212.56	2.43795	1210.12	4.87589	1215	0.00401308	0.0342059
		0.1509	2093	296	1797	592	2389	0.247802	0.247699		0.9626	1213.54	2.45518	1211.09	4.91035	1216	0.00403812	0.0344613
		0.1508	2094	296	1798	592	2390	0.247699	0.247699		0.9621	1214.53	2.47254	1212.05	4.94507	1217	0.00406333	0.0347188
		0.1507	2095	298	1797	596	2393	0.24906	0.248959		0.9617	1215.51	2.49003	1213.02	4.98005	1218	0.00408871	0.0349782
		0.1506	2095	299	1796	598	2394	0.249791	0.248959		0.9612	1216.49	2.50765	1213.98	5.01529	1219	0.00411427	0.0352396
		0.1505	2097	299	1798	598	2396	0.249583	0.248959		0.9605	1217.47	2.5254	1214.95	5.05079	1220	0.00413999	0.0355031
		0.1504	2098	299	1799	598	2397	0.249479	0.248959		0.9604	1218.46	2.54328	1215.91	5.08656	1221	0.0041659	0.0357685
		0.1502	2101	299	1802	598	2400	0.249167	0.248959		0.9597	1219.44	2.5613	1216.88	5.1226	1222	0.00419198	0.036036
		0.1501	2103	299	1804	598	2402	0.248959	0.248959		0.9593	1220.42	2.57945	1217.84	5.1589	1223	0.00421824	0.0364411
		0.15	2104	300	1804	600	2404	0.249584	0.249066		0.9593	1221.4	2.59774	1218.8	5.19548	1224	0.00424467	0.0364411
		0.1499	2105	300	1805	600	2405	0.24948	0.249066		0.9592	1222.38	2.61617	1219.77	5.23233	1225	0.00427129	0.0368509
		0.1498	2107	300	1807	600	2407	0.249273	0.249066		0.9589	1223.37	2.63473	1220.73	5.26946	1226	0.00429809	0.0372654
		0.1497	2108	300	1808	600	2408	0.249169	0.249066		0.9589	1224.35	2.65343	1221.69	5.30686	1227	0.00432507	0.0372654
		0.1496	2109	300	1809	600	2409	0.249066	0.249066		0.9588	1225.33	2.67227	1222.66	5.34455	1228	0.00435224	0.0376848
		0.1495	2109	301	1808	602	2410	0.249793	0.249689		0.9583	1226.31	2.69126	1223.62	5.38252	1229	0.00437959	0.037967
		0.1492	2110	301	1809	602	2411	0.249689	0.249689		0.9581	1227.29	2.71038	1224.58	5.42077	1230	0.00440713	0.0382513
		0.1491	2113	302	1811	604	2415	0.250104	0.249897		0.9575	1228.27	2.72965	1225.54	5.45931	1231	0.00443485	0.0385379
		0.149	2114	302	1812	604	2416	0.25	0.249897		0.9573	1229.25	2.74907	1226.5	5.49813	1232	0.00446277	0.0394108
		0.1488	2115	302	1813	604	2417	0.249897	0.249897		0.9573	1230.23	2.76862	1227.46	5.53725	1233	0.00449088	0.0394108
		0.1487	2118	303	1815	606	2421	0.25031	0.25031		0.9573	1231.21	2.78833	1228.42	5.57666	1234	0.00451917	0.0394108
		0.1486	2119	304	1815	608	2423	0.250929	0.250929		0.9573	1232.19	2.80818	1229.38	5.61637	1235	0.00454767	0.0394108
		0.1485	2120	306	1814	612	2426	0.252267	0.252267		0.9573	1233.17	2.82819	1230.34	5.65637	1236	0.00457635	0.0394108
		0.1483	2121	307	1814	614	2428	0.252883	0.252675		0.9565	1234.15	2.84834	1231.3	5.69667	1237	0.00460523	0.0403039
		0.1481	2122	307	1815	614	2429	0.252779	0.252675		0.9557	1235.13	2.86864	1232.26	5.73728	1238	0.00463431	0.0406061
		0.1479	2123	307	1816	614	2430	0.252675	0.252675		0.9551	1236.11	2.8891	1233.22	5.77819	1239	0.00466359	0.0409106
		0.1477	2124	308	1816	616	2432	0.253289	0.252968		0.9547	1237.09	2.9097	1234.18	5.81941	1240	0.00469307	0.0412175
		0.1476	2127	308	1819	616	2435	0.252977	0.252968		0.9542	1238.07	2.93047	1235.14	5.86094	1241	0.00472275	0.0415267
		0.1475	2127	309	1818	618	2436	0.253695	0.252968		0.9532	1239.05	2.95139	1236.1	5.90277	1242	0.00475264	0.0418383
		0.1474	2129	309	1820	618	2438	0.253486	0.252968		0.9531	1240.03	2.97246	1237.06	5.94493	1243	0.00478272	0.0421522
		0.1473	2134	309	1825	618	2443	0.252968	0.252968		0.9527	1241.01	2.9937	1238.01	5.9874	1244	0.00481302	0.0424685
		0.1471	2134	311	1823	622	2445	0.254397	0.254397		0.9519	1241.98	3.01509	1238.97	6.03018	1245	0.00484352	0.0427873
		0.1469	2135	312	1823	624	2447	0.255006	0.254679		0.9514	1242.96	3.03665	1239.93	6.07329	1246	0.00487423	0.0431084
		0.1468	2136	312	1824	624	2448	0.254902	0.254679		0.9512	1243.94	3.05836	1240.88	6.11672	1247	0.00490515	0.043432
		0.1467	2138	312	1826	624	2450	0.254694	0.254679		0.9511	1244.92	3.08024	1241.84	6.16048	1248	0.00493628	0.043758
		0.1464	2138	313	1825	626	2451	0.255406	0.254679		0.9509	1245.9	3.10228	1242.8	6.20457	1249	0.00496763	0.0440865
		0.1463	2139	313	1826	626	2452	0.255302	0.254679		0.9503	1246.88	3.12449	1243.75	6.24899	1250	0.00499919	0.0444175
		0.1462	2140	313	1827	626	2453	0.255198	0.254679		0.9502	1247.85	3.14687	1244.71	6.29374	1251	0.00503096	0.044751
		0.146	2141	313	1828	626	2454	0.255094	0.254679		0.9496	1248.83	3.16941	1245.66	6.33882	1252	0.00506296	0.045087
		0.1459	2142	313	1829	626	2455	0.25499	0.254679		0.9495	1249.81	3.19212	1246.62	6.38425	1253	0.00509517	0.0454256
		0.1458	2143	313	1830	626	2456	0.254886	0.254679		0.9493	1250.78	3.21501	1247.57	6.43002	1254	0.0051276	0.0459382
		0.1456	2145	313	1832	626	2458	0.254679	0.254679		0.9493	1251.76	3.23806	1248.52	6.47613	1255	0.00516026	0.0459382
		0.1455	2145	315	1830	630	2460	0.256098	0.256098		0.949	1252.74	3.26129	1249.48	6.52258	1256	0.00519314	0.0464566
		0.1452	2145	316	1829	632	2461	0.256806	0.256806		0.9486	1253.72	3.28469	1250.43	6.56939	1257	0.00522624	0.0468055
		0.1451	2145	317	1828	634	2462	0.257514	0.257514		0.9484	1254.69	3.30827	1251.38	6.61655	1258	0.00525958	0.0473338
		0.145	2145	319	1826	638	2464	0.258929	0.258824		0.9484	1255.67	3.33203	1252.34	6.66406	1259	0.00529314	0.0473338
		0.1448	2146	319	1827	638	2465	0.258824	0.258824		0.9481	1256.64	3.35596	1253.29	6.71193	1260	0.00532693	0.047868
		0.1447	2150	320	1830	640	2470	0.259109	0.2589		0.9479	1257.62	3.38008	1254.24	6.76015	1261	0.00536095	0.0482275
		0.1446	2151	320	1831	640	2471	0.259004	0.2589		0.9477	1258.6	3.40437	1255.19	6.80874	1262	0.0053952	0.0485897
		0.1445	2152	320	1832	640	2472	0.2589	0.2589		0.9473	1259.57	3.42885	1256.14	6.8577	1263	0.00542969	0.0489546
		0.1443	2152	321	1831	642	2473	0.259604	0.259394		0.9468	1260.55	3.45351	1257.09	6.90702	1264	0.00546441	0.0493222
		0.1442	2153	321	1832	642	2474	0.259499	0.259394		0.9457	1261.52	3.47836	1258.04	6.95671	1265	0.00549938	0.0498789
		0.1441	2154	321	1833	642	2475	0.259394	0.259394		0.9457	1262.5	3.50339	1258.99	7.00678	1266	0.00553458	0.0498789
		0.144	2154	322	1832	644	2476	0.260097	0.260097		0.9452	1263.47	3.52861	1259.94	7.05722	1267	0.00557002	0.0504417
		0.1439	2155	323	1832	646	2478	0.260694	0.260589		0.9445	1264.45	3.55402	1260.89	7.10804	1268	0.00560571	0.0508205
		0.1435	2156	323	1833	646	2479	0.260589	0.260589		0.9441	1265.42	3.57962	1261.84	7.15924	1269	0.00564164	0.0512021
		0.1434	2159	324	1835	648	2483	0.260975	0.260765		0.9422	1266.39	3.60542	1262.79	7.21083	1270	0.00567782	0.0515865
		0.1432	2160	324	1836	648	2484	0.26087	0.260765		0.9421	1267.37	3.6314	1263.74	7.2628	1271	0.00571424	0.0519738
		0.1431	2161	324	1837	648	2485	0.260765	0.260765		0.942	1268.34	3.65758	1264.68	7.31517	1272	0.00575092	0.0523639
		0.1429	2161	325	1836	650	2486	0.261464	0.261464		0.9419	1269.32	3.68396	1265.63	7.36793	1273	0.00578784	0.0529546
		0.1428	2161	326	1835	652	2487	0.262163	0.262163		0.9419	1270.29	3.71054	1266.58	7.42108	1274	0.00582502	0.0529546
		0.1427	2163	328	1835	656	2491	0.263348	0.26278		0.9412	1271.26	3.73732	1267.53	7.47463	1275	0.00586245	0.0535518
		0.1426	2164	328	1836	656	2492	0.263242	0.26278		0.9407	1272.24	3.76429	1268.47	7.52858	1276	0.00590014	0.0539537
		0.1425	2164	329	1835	658	2493	0.263939	0.26278		0.9396	1273.21	3.79147	1269.42	7.58294	1277	0.00593809	0.0545621
		0.1424	2165	329	1836	658	2494	0.263833	0.26278		0.9396	1274.18	3.81885	1270.36	7.63771	1278	0.0059763	0.0545621
		0.1423	2166	329	1837	658	2495	0.263727	0.26278		0.9391	1275.15	3.84644	1271.31	7.69289	1279	0.00601477	0.0551772
		0.1421	2168	329	1839	658	2497	0.263516	0.26278		0.9387	1276.13	3.87424	1272.25	7.74848	1280	0.0060535	0.055591
		0.142	2171	329	1842	658	2500	0.2632	0.26278		0.9384	1277.1	3.90224	1273.2	7.80449	1281	0.00609249	0.0560079
		0.1419	2172	329	1843	658	2501	0.263095	0.26278		0.9383	1278.07	3.93046	1274.14	7.86091	1282	0.00613176	0.0564279
		0.1418	2174	329	1845	658	2503	0.262885	0.26278		0.938	1279.04	3.95888	1275.08	7.91776	1283	0.00617129	0.056851
		0.1416	2175	329	1846	658	2504	0.26278	0.26278		0.9378	1280.01	3.98752	1276.02	7.97504	1284	0.00621109	0.0572771
		0.1415	2175	330	1845	660	2505	0.263473	0.263368		0.937	1280.98	4.01637	1276.97	8.03275	1285	0.00625117	0.0577064
		0.1414	2176	330	1846	660	2506	0.263368	0.263368		0.9368	1281.95	4.04544	1277.91	8.09089	1286	0.00629151	0.0583562
		0.1413	2176	331	1845	662	2507	0.264061	0.263955		0.9368	1282.93	4.07473	1278.85	8.14946	1287	0.00633214	0.0583562
		0.1411	2177	331	1846	662	2508	0.263955	0.263955		0.9359	1283.9	4.10424	1279.79	8.20848	1288	0.00637304	0.0590132
		0.141	2177	332	1845	664	2509	0.264647	0.264647		0.9347	1284.87	4.13397	1280.73	8.26793	1289	0.00641422	0.0594551
		0.1409	2177	333	1844	666	2510	0.265339	0.265233		0.9342	1285.84	4.16392	1281.67	8.32783	1290	0.00645568	0.0599003
		0.1408	2178	333	1845	666	2511	0.265233	0.265233		0.9333	1286.81	4.19409	1282.61	8.38818	1291	0.00649743	0.0603487
		0.1407	2180	335	1845	670	2515	0.266402	0.266296		0.9332	1287.78	4.22449	1283.55	8.44898	1292	0.00653946	0.0608004
		0.1405	2181	335	1846	670	2516	0.266296	0.266296		0.9322	1288.74	4.25512	1284.49	8.51024	1293	0.00658178	0.0614841
		0.1404	2181	336	1845	672	2517	0.266985	0.266985		0.9322	1289.71	4.28597	1285.43	8.57195	1294	0.00662438	0.0614841
		0.1402	2181	337	1844	674	2518	0.267673	0.267673		0.9317	1290.68	4.31706	1286.37	8.63412	1295	0.00666728	0.0624072
		0.14	2181	338	1843	676	2519	0.26836	0.268254		0.9317	1291.65	4.34838	1287.3	8.69677	1296	0.00671047	0.0624072
		0.1399	2182	338	1844	676	2520	0.268254	0.268254		0.9314	1292.62	4.37994	1288.24	8.75987	1297	0.00675395	0.0631084
		0.1398	2183	339	1844	678	2522	0.268834	0.268834		0.9306	1293.59	4.41173	1289.18	8.82345	1298	0.00679773	0.06358
		0.1397	2183	340	1843	680	2523	0.26952	0.26952		0.9304	1294.56	4.44375	1290.11	8.88751	1299	0.00684181	0.064055
		0.1394	2183	341	1842	682	2524	0.270206	0.270206		0.9293	1295.52	4.47602	1291.05	8.95204	1300	0.00688619	0.0645335
		0.1393	2183	343	1840	686	2526	0.271576	0.271468		0.9291	1296.49	4.50853	1291.98	9.01706	1301	0.00693087	0.0650153
		0.1392	2184	343	1841	686	2527	0.271468	0.271468		0.929	1297.46	4.54128	1292.92	9.08256	1302	0.00697585	0.0657446
		0.1391	2184	344	1840	688	2528	0.272152	0.272152		0.929	1298.43	4.57427	1293.85	9.14855	1303	0.00702114	0.0657446
		0.1387	2186	345	1841	690	2531	0.27262	0.272512		0.9286	1299.39	4.60752	1294.78	9.21503	1304	0.00706674	0.0664818
		0.1386	2187	345	1842	690	2532	0.272512	0.272512		0.9284	1300.36	4.641	1295.72	9.28201	1305	0.00711265	0.0669776
		0.1385	2187	346	1841	692	2533	0.273194	0.273194		0.9279	1301.33	4.67474	1296.65	9.34949	1306	0.00715887	0.0674769
		0.1384	2187	347	1840	694	2534	0.273875	0.27337		0.9273	1302.29	4.70873	1297.58	9.41747	1307	0.00720541	0.0679798
		0.1381	2188	348	1840	696	2536	0.274448	0.27337		0.9268	1303.26	4.74298	1298.51	9.48595	1308	0.00725226	0.0684862
		0.1376	2191	348	1843	696	2539	0.274124	0.27337		0.9266	1304.22	4.77747	1299.45	9.55495	1309	0.00729943	0.0689963
		0.1375	2193	348	1845	696	2541	0.273908	0.27337		0.9253	1305.19	4.81223	1300.38	9.62446	1310	0.00734691	0.0695099
		0.1374	2194	348	1846	696	2542	0.2738	0.27337		0.9249	1306.15	4.84724	1301.31	9.69449	1311	0.00739473	0.0700272
		0.1373	2195	348	1847	696	2543	0.273692	0.27337		0.9237	1307.12	4.88252	1302.23	9.76503	1312	0.00744286	0.0705481
		0.1371	2196	348	1848	696	2544	0.273585	0.27337		0.9233	1308.08	4.91805	1303.16	9.83611	1313	0.00749132	0.0710727
		0.137	2197	348	1849	696	2545	0.273477	0.27337		0.9223	1309.05	4.95385	1304.09	9.90771	1314	0.00754011	0.071601
		0.1369	2198	348	1850	696	2546	0.27337	0.27337		0.922	1310.01	4.98992	1305.02	9.97984	1315	0.00758923	0.072133
		0.1368	2198	349	1849	698	2547	0.274048	0.274048		0.9219	1310.97	5.02625	1305.95	10.0525	1316	0.00763869	0.0726687
		0.1361	2199	350	1849	700	2549	0.274617	0.27451		0.9204	1311.94	5.06286	1306.87	10.1257	1317	0.00768847	0.0732082
		0.1359	2200	350	1850	700	2550	0.27451	0.27451		0.9188	1312.9	5.09973	1307.8	10.1995	1318	0.0077386	0.0737514
		0.1358	2200	351	1849	702	2551	0.275186	0.275078		0.9178	1313.86	5.13688	1308.73	10.2738	1319	0.00778906	0.0745734
		0.1356	2201	351	1850	702	2552	0.275078	0.275078		0.9178	1314.83	5.17431	1309.65	10.3486	1320	0.00783986	0.0745734
		0.1355	2202	352	1850	704	2554	0.275646	0.27543		0.9177	1315.79	5.21201	1310.58	10.424	1321	0.00789101	0.0754039
		0.1353	2203	352	1851	704	2555	0.275538	0.27543		0.9164	1316.75	5.24999	1311.5	10.5	1322	0.0079425	0.076243
		0.1352	2204	352	1852	704	2556	0.27543	0.27543		0.9164	1317.71	5.28825	1312.42	10.5765	1323	0.00799434	0.076243
		0.1349	2204	353	1851	706	2557	0.276105	0.276105		0.9159	1318.67	5.3268	1313.35	10.6536	1324	0.00804653	0.0770909
		0.1345	2204	355	1849	710	2559	0.277452	0.277452		0.9155	1319.63	5.36563	1314.27	10.7313	1325	0.00809907	0.077661
		0.1343	2205	356	1849	712	2561	0.278016	0.277691		0.9139	1320.6	5.40475	1315.19	10.8095	1326	0.00815196	0.0782351
		0.134	2206	356	1850	712	2562	0.277908	0.277691		0.9128	1321.56	5.44415	1316.11	10.8883	1327	0.00820521	0.0788131
		0.1339	2207	356	1851	712	2563	0.277799	0.277691		0.912	1322.52	5.48385	1317.03	10.9677	1328	0.00825881	0.079395
		0.1338	2208	356	1852	712	2564	0.277691	0.277691		0.9115	1323.48	5.52384	1317.95	11.0477	1329	0.00831278	0.0799809
		0.1334	2208	357	1851	714	2565	0.278363	0.278363		0.9094	1324.44	5.56413	1318.87	11.1283	1330	0.00836711	0.0805708
		0.1333	2208	359	1849	718	2567	0.279704	0.279704		0.9089	1325.4	5.60471	1319.79	11.2094	1331	0.0084218	0.0814632
		0.1332	2209	360	1849	720	2569	0.280265	0.280265		0.9089	1326.35	5.64559	1320.71	11.2912	1332	0.00847687	0.0814632
		0.133	2209	361	1848	722	2570	0.280934	0.28028		0.9086	1327.31	5.68677	1321.63	11.3735	1333	0.0085323	0.0823647
		0.1329	2213	361	1852	722	2574	0.280497	0.28028		0.9079	1328.27	5.72826	1322.54	11.4565	1334	0.0085881	0.0829708
		0.1327	2214	361	1853	722	2575	0.280388	0.28028		0.9077	1329.23	5.77005	1323.46	11.5401	1335	0.00864427	0.0841952
		0.1325	2215	361	1854	722	2576	0.28028	0.28028		0.9077	1330.19	5.81215	1324.38	11.6243	1336	0.00870082	0.0841952
		0.1324	2215	363	1852	726	2578	0.281614	0.281069		0.9077	1331.15	5.85456	1325.29	11.7091	1337	0.00875775	0.0841952
		0.1318	2216	363	1853	726	2579	0.281504	0.281069		0.9068	1332.1	5.89727	1326.21	11.7945	1338	0.00881506	0.0854362
		0.1317	2217	363	1854	726	2580	0.281395	0.281069		0.9058	1333.06	5.94031	1327.12	11.8806	1339	0.00887275	0.0860629
		0.1316	2218	363	1855	726	2581	0.281286	0.281069		0.9049	1334.02	5.98365	1328.03	11.9673	1340	0.00893082	0.0866938
		0.1315	2219	363	1856	726	2582	0.281177	0.281069		0.9038	1334.97	6.02732	1328.95	12.0546	1341	0.00898929	0.0873288
		0.1314	2220	363	1857	726	2583	0.281069	0.281069		0.9036	1335.93	6.0713	1329.86	12.1426	1342	0.00904814	0.0879681
		0.1312	2221	364	1857	728	2585	0.281625	0.281298		0.9024	1336.88	6.11561	1330.77	12.2312	1343	0.00910738	0.0886117
		0.1311	2222	364	1858	728	2586	0.281516	0.281298		0.9019	1337.84	6.16024	1331.68	12.3205	1344	0.00916702	0.0892595
		0.1308	2224	364	1860	728	2588	0.281298	0.281298		0.8997	1338.79	6.20519	1332.59	12.4104	1345	0.00922705	0.0899115
		0.1307	2224	365	1859	730	2589	0.281962	0.281962		0.8992	1339.75	6.25048	1333.5	12.501	1346	0.00928748	0.0905678
		0.1306	2224	366	1858	732	2590	0.282625	0.282625		0.8991	1340.7	6.29609	1334.41	12.5922	1347	0.00934832	0.0912285
		0.1305	2224	367	1857	734	2591	0.283288	0.283179		0.8973	1341.66	6.34204	1335.32	12.6841	1348	0.00940955	0.0918935
		0.1304	2225	367	1858	734	2592	0.283179	0.283179		0.8971	1342.61	6.38832	1336.22	12.7766	1349	0.00947119	0.0925628
		0.1303	2225	368	1857	736	2593	0.283841	0.283841		0.8954	1343.57	6.43494	1337.13	12.8699	1350	0.00953324	0.0932364
		0.1302	2225	369	1856	738	2594	0.284503	0.284503		0.8951	1344.52	6.48189	1338.04	12.9638	1351	0.0095957	0.0939145
		0.1301	2226	370	1856	740	2596	0.285054	0.284944		0.8939	1345.47	6.52919	1338.94	13.0584	1352	0.00965857	0.0945969
		0.1297	2227	370	1857	740	2597	0.284944	0.284944		0.892	1346.42	6.57684	1339.85	13.1537	1353	0.00972186	0.0956288
		0.1296	2227	371	1856	742	2598	0.285604	0.285494		0.892	1347.38	6.62482	1340.75	13.2496	1354	0.00978556	0.0956288
		0.1295	2228	371	1857	742	2599	0.285494	0.285494		0.8918	1348.33	6.67316	1341.65	13.3463	1355	0.00984968	0.0966707
		0.1294	2228	372	1856	744	2600	0.286154	0.286154		0.8888	1349.28	6.72184	1342.56	13.4437	1356	0.00991422	0.0973708
		0.1293	2229	373	1856	746	2602	0.286703	0.286703		0.8874	1350.23	6.77088	1343.46	13.5418	1357	0.00997919	0.0980754
		0.1292	2229	374	1855	748	2603	0.287361	0.28725		0.8866	1351.18	6.82027	1344.36	13.6405	1358	0.0100446	0.0987845
		0.1289	2230	374	1856	748	2604	0.28725	0.28725		0.8864	1352.13	6.87002	1345.26	13.74	1359	0.0101104	0.0998566
		0.1286	2231	375	1856	750	2606	0.287797	0.287797		0.8864	1353.08	6.92013	1346.16	13.8403	1360	0.0101767	0.0998566
		0.1285	2231	376	1855	752	2607	0.288454	0.288344		0.8863	1354.03	6.9706	1347.06	13.9412	1361	0.0102434	0.100939
		0.1284	2232	376	1856	752	2608	0.288344	0.288344		0.8853	1354.98	7.02143	1347.96	14.0429	1362	0.0103105	0.101666
		0.1283	2233	377	1856	754	2610	0.288889	0.28888		0.8846	1355.93	7.07263	1348.85	14.1453	1363	0.010378	0.102398
		0.1282	2233	378	1855	756	2611	0.289544	0.28888		0.8843	1356.88	7.1242	1349.75	14.2484	1364	0.010446	0.103134
		0.1281	2234	378	1856	756	2612	0.289433	0.28888		0.884	1357.82	7.17614	1350.65	14.3523	1365	0.0105145	0.103875
		0.128	2236	378	1858	756	2614	0.289212	0.28888		0.8816	1358.77	7.22845	1351.54	14.4569	1366	0.0105834	0.104621
		0.1279	2237	378	1859	756	2615	0.289101	0.28888		0.8811	1359.72	7.28113	1352.44	14.5623	1367	0.0106527	0.105371
		0.1278	2239	378	1861	756	2617	0.28888	0.28888		0.8797	1360.67	7.3342	1353.33	14.6684	1368	0.0107225	0.106126
		0.1277	2240	380	1860	760	2620	0.290076	0.289745		0.8778	1361.61	7.38764	1354.22	14.7753	1369	0.0107928	0.107267
		0.1276	2242	380	1862	760	2622	0.289855	0.289745		0.8778	1362.56	7.44146	1355.12	14.8829	1370	0.0108635	0.107267
		0.1274	2243	380	1863	760	2623	0.289745	0.289745		0.8766	1363.5	7.49567	1356.01	14.9913	1371	0.0109346	0.108418
		0.1272	2244	381	1863	762	2625	0.290286	0.290286		0.875	1364.45	7.55027	1356.9	15.1005	1372	0.0110062	0.109191
		0.1271	2244	382	1862	764	2626	0.290937	0.290702		0.8701	1365.39	7.60525	1357.79	15.2105	1373	0.0110783	0.10997
		0.127	2245	382	1863	764	2627	0.290826	0.290702		0.8683	1366.34	7.66063	1358.68	15.3213	1374	0.0111508	0.110752
		0.1269	2246	382	1864	764	2628	0.290715	0.290702		0.8682	1367.28	7.7164	1359.57	15.4328	1375	0.0112239	0.11154
		0.1266	2246	383	1863	766	2629	0.291366	0.290702		0.8675	1368.23	7.77257	1360.45	15.5451	1376	0.0112973	0.11273
		0.1264	2249	383	1866	766	2632	0.291033	0.290702		0.8675	1369.17	7.82913	1361.34	15.6583	1377	0.0113713	0.11273
		0.1263	2250	383	1867	766	2633	0.290923	0.290702		0.8662	1370.11	7.8861	1362.23	15.7722	1378	0.0114457	0.113931
		0.1261	2251	383	1868	766	2634	0.290812	0.290702		0.8646	1371.06	7.94347	1363.11	15.8869	1379	0.0115206	0.115143
		0.126	2252	383	1869	766	2635	0.290702	0.290702		0.8646	1372	8.00124	1364	16.0025	1380	0.011596	0.115143
		0.1259	2252	384	1868	768	2636	0.291351	0.291351		0.8637	1372.94	8.05942	1364.88	16.1188	1381	0.0116719	0.116366
		0.1258	2254	385	1869	770	2639	0.291777	0.291777		0.8634	1373.88	8.11802	1365.76	16.236	1382	0.0117482	0.117187
		0.1255	2255	386	1869	772	2641	0.292314	0.291871		0.8629	1374.82	8.17702	1366.65	16.354	1383	0.0118251	0.118012
		0.1254	2258	386	1872	772	2644	0.291982	0.291871		0.8624	1375.76	8.23644	1367.53	16.4729	1384	0.0119024	0.118843
		0.1253	2259	386	1873	772	2645	0.291871	0.291871		0.8617	1376.7	8.29628	1368.41	16.5926	1385	0.0119802	0.119678
		0.1252	2260	387	1873	774	2647	0.292406	0.292406		0.8606	1377.64	8.35654	1369.29	16.7131	1386	0.0120585	0.120519
		0.125	2260	388	1872	776	2648	0.293051	0.293051		0.8597	1378.58	8.41723	1370.17	16.8345	1387	0.0121373	0.121364
		0.1249	2260	389	1871	778	2649	0.293696	0.293363		0.8587	1379.52	8.47833	1371.04	16.9567	1388	0.0122166	0.122214
		0.1247	2261	389	1872	778	2650	0.293585	0.293363		0.8567	1380.46	8.53987	1371.92	17.0797	1389	0.0122964	0.123069
		0.1245	2262	389	1873	778	2651	0.293474	0.293363		0.8549	1381.4	8.60183	1372.8	17.2037	1390	0.0123767	0.123929
		0.1244	2263	389	1874	778	2652	0.293363	0.293363		0.8545	1382.34	8.66423	1373.67	17.3285	1391	0.0124576	0.124793
		0.1243	2264	391	1873	782	2655	0.294539	0.294539		0.8543	1383.27	8.72706	1374.55	17.4541	1392	0.0125389	0.125663
		0.1242	2265	393	1872	786	2658	0.295711	0.295711		0.8519	1384.21	8.79033	1375.42	17.5807	1393	0.0126207	0.126537
		0.1241	2265	395	1870	790	2660	0.296992	0.296992		0.849	1385.15	8.85404	1376.29	17.7081	1394	0.0127031	0.127417
		0.124	2266	397	1869	794	2663	0.29816	0.297936		0.8483	1386.08	8.91819	1377.16	17.8364	1395	0.0127859	0.12919
		0.1236	2268	397	1871	794	2665	0.297936	0.297936		0.8483	1387.02	8.98278	1378.03	17.9656	1396	0.0128693	0.12919
		0.1234	2268	398	1870	796	2666	0.298575	0.298575		0.8483	1387.95	9.04783	1378.9	18.0957	1397	0.0129532	0.12919
		0.1232	2269	399	1870	798	2668	0.2991	0.2991		0.8459	1388.89	9.11332	1379.77	18.2266	1398	0.0130377	0.130983
		0.1231	2270	400	1870	800	2670	0.299625	0.299513		0.8457	1389.82	9.17926	1380.64	18.3585	1399	0.0131226	0.131887
		0.123	2271	400	1871	800	2671	0.299513	0.299513		0.8436	1390.75	9.24566	1381.51	18.4913	1400	0.0132081	0.132796
		0.1229	2272	401	1871	802	2673	0.300037	0.300037		0.843	1391.69	9.31252	1382.37	18.625	1401	0.0132941	0.134629
		0.1225	2272	404	1868	808	2676	0.301943	0.30183		0.843	1392.62	9.37983	1383.24	18.7597	1402	0.0133806	0.134629
		0.1224	2273	404	1869	808	2677	0.30183	0.30183		0.843	1393.55	9.44761	1384.1	18.8952	1403	0.0134677	0.134629
		0.1223	2273	405	1868	810	2678	0.302465	0.302013		0.8429	1394.48	9.51585	1384.97	19.0317	1404	0.0135553	0.136482
		0.1221	2276	405	1871	810	2681	0.302126	0.302013		0.8428	1395.42	9.58455	1385.83	19.1691	1405	0.0136435	0.137415
		0.122	2277	405	1872	810	2682	0.302013	0.302013		0.8421	1396.35	9.65373	1386.69	19.3075	1406	0.0137322	0.138354
		0.1219	2279	406	1873	812	2685	0.302421	0.302308		0.8417	1397.28	9.72338	1387.55	19.4468	1407	0.0138214	0.139298
		0.1218	2280	406	1874	812	2686	0.302308	0.302308		0.8401	1398.21	9.7935	1388.41	19.587	1408	0.0139112	0.140246
		0.1217	2280	407	1873	814	2687	0.30294	0.30294		0.8398	1399.14	9.8641	1389.27	19.7282	1409	0.0140016	0.141678
		0.1215	2280	408	1872	816	2688	0.303571	0.303346		0.8398	1400.06	9.93518	1390.13	19.8704	1410	0.0140925	0.141678
		0.1214	2282	408	1874	816	2690	0.303346	0.303346		0.8368	1400.99	10.0067	1390.99	20.0135	1411	0.0141839	0.143122
		0.1213	2282	409	1873	818	2691	0.303976	0.30375		0.8366	1401.92	10.0788	1391.84	20.1576	1412	0.0142759	0.14409
		0.1212	2284	409	1875	818	2693	0.30375	0.30375		0.8331	1402.85	10.1513	1392.7	20.3026	1413	0.0143685	0.145064
		0.1211	2284	410	1874	820	2694	0.30438	0.30438		0.8326	1403.78	10.2243	1393.55	20.4487	1414	0.0144616	0.146042
		0.121	2284	412	1872	824	2696	0.305638	0.305185		0.8306	1404.7	10.2979	1394.4	20.5957	1415	0.0145553	0.147025
		0.1209	2285	412	1873	824	2697	0.305525	0.305185		0.8305	1405.63	10.3719	1395.26	20.7437	1416	0.0146495	0.148014
		0.1204	2286	412	1874	824	2698	0.305411	0.305185		0.8301	1406.55	10.4464	1396.11	20.8927	1417	0.0147443	0.149007
		0.1203	2287	412	1875	824	2699	0.305298	0.305185		0.8258	1407.48	10.5214	1396.96	21.0427	1418	0.0148397	0.150005
		0.1202	2288	412	1876	824	2700	0.305185	0.305185		0.8246	1408.4	10.5969	1397.81	21.1937	1419	0.0149357	0.151009
		0.1201	2288	413	1875	826	2701	0.305813	0.305813		0.8242	1409.33	10.6729	1398.65	21.3458	1420	0.0150322	0.152017
		0.12	2288	415	1873	830	2703	0.307066	0.307066		0.8231	1410.25	10.7494	1399.5	21.4988	1421	0.0151293	0.15303
		0.1199	2290	416	1874	832	2706	0.307465	0.307465		0.823	1411.17	10.8264	1400.35	21.6528	1422	0.015227	0.154048
		0.1198	2292	417	1875	834	2709	0.307863	0.307863		0.8229	1412.1	10.904	1401.19	21.8079	1423	0.0153253	0.155071
		0.1196	2292	418	1874	836	2710	0.308487	0.308487		0.8226	1413.02	10.982	1402.04	21.964	1424	0.0154242	0.156099
		0.1195	2292	420	1872	840	2712	0.309735	0.309506		0.8217	1413.94	11.0606	1402.88	22.1211	1425	0.0155236	0.157132
		0.1194	2294	420	1874	840	2714	0.309506	0.309506		0.8199	1414.86	11.1397	1403.72	22.2793	1426	0.0156236	0.158169
		0.1192	2294	421	1873	842	2715	0.310129	0.309673		0.8191	1415.78	11.2193	1404.56	22.4385	1427	0.0157243	0.16026
		0.1191	2297	421	1876	842	2718	0.309787	0.309673		0.8191	1416.7	11.2994	1405.4	22.5988	1428	0.0158255	0.16026
		0.119	2298	421	1877	842	2719	0.309673	0.309673		0.8191	1417.62	11.38	1406.24	22.7601	1429	0.0159273	0.16026
		0.1189	2300	422	1878	844	2722	0.310066	0.310066		0.8177	1418.54	11.4612	1407.08	22.9225	1430	0.0160297	0.16237
		0.1188	2300	423	1877	846	2723	0.310687	0.310687		0.8164	1419.46	11.543	1407.91	23.0859	1431	0.0161327	0.163965
		0.1187	2302	424	1878	848	2726	0.311079	0.310964		0.8164	1420.37	11.6252	1408.75	23.2504	1432	0.0162363	0.163965
		0.1186	2303	424	1879	848	2727	0.310964	0.310964		0.8151	1421.29	11.708	1409.58	23.416	1433	0.0163405	0.165571
		0.1184	2303	425	1878	850	2728	0.311584	0.311584		0.8143	1422.21	11.7913	1410.42	23.5826	1434	0.0164453	0.167188
		0.1182	2304	426	1878	852	2730	0.312088	0.312088		0.8143	1423.12	11.8752	1411.25	23.7503	1435	0.0165508	0.167188
		0.118	2304	427	1877	854	2731	0.312706	0.312592		0.8133	1424.04	11.9596	1412.08	23.9192	1436	0.0166568	0.168816
		0.1179	2305	427	1878	854	2732	0.312592	0.312592		0.8113	1424.96	12.0445	1412.91	24.0891	1437	0.0167634	0.170455
		0.1177	2305	428	1877	856	2733	0.313209	0.312865		0.8113	1425.87	12.13	1413.74	24.2601	1438	0.0168707	0.170455
		0.1175	2306	428	1878	856	2734	0.313094	0.312865		0.8109	1426.78	12.2161	1414.57	24.4322	1439	0.0169786	0.172657
		0.1172	2307	428	1879	856	2735	0.31298	0.312865		0.8109	1427.7	12.3027	1415.39	24.6054	1440	0.0170871	0.172657
		0.1171	2308	428	1880	856	2736	0.312865	0.312865		0.8074	1428.61	12.3899	1416.22	24.7797	1441	0.0171962	0.174321
		0.117	2308	429	1879	858	2737	0.313482	0.313341		0.8056	1429.52	12.4776	1417.04	24.9552	1442	0.0173059	0.175996
		0.1168	2309	429	1880	858	2738	0.313367	0.313341		0.8056	1430.43	12.5659	1417.87	25.1317	1443	0.0174163	0.175996
		0.1166	2311	430	1881	860	2741	0.313754	0.313341		0.8052	1431.35	12.6547	1418.69	25.3094	1444	0.0175273	0.177681
		0.1165	2312	431	1881	862	2743	0.314254	0.313341		0.8037	1432.26	12.7441	1419.51	25.4882	1445	0.0176389	0.178811
		0.1163	2313	431	1882	862	2744	0.31414	0.313341		0.8019	1433.17	12.8341	1420.33	25.6681	1446	0.0177511	0.179945
		0.1162	2315	431	1884	862	2746	0.313911	0.313341		0.7995	1434.08	12.9246	1421.15	25.8492	1447	0.017864	0.181084
		0.1161	2317	431	1886	862	2748	0.313683	0.313341		0.7968	1434.98	13.0157	1421.97	26.0315	1448	0.0179775	0.182227
		0.116	2318	431	1887	862	2749	0.313569	0.313341		0.7954	1435.89	13.1074	1422.79	26.2148	1449	0.0180917	0.183375
		0.1158	2320	431	1889	862	2751	0.313341	0.313341		0.7943	1436.8	13.1997	1423.6	26.3994	1450	0.0182065	0.184528
		0.1157	2320	432	1888	864	2752	0.313953	0.313953		0.7937	1437.71	13.2925	1424.41	26.585	1451	0.0183219	0.185685
		0.1156	2320	433	1887	866	2753	0.314566	0.314452		0.7899	1438.61	13.3859	1425.23	26.7719	1452	0.0184379	0.186847
		0.1155	2321	433	1888	866	2754	0.314452	0.314452		0.7894	1439.52	13.48	1426.04	26.9599	1453	0.0185546	0.188014
		0.1153	2321	435	1886	870	2756	0.315675	0.315675		0.7872	1440.43	13.5745	1426.85	27.1491	1454	0.018672	0.189185
		0.1151	2322	436	1886	872	2758	0.316171	0.316171		0.7869	1441.33	13.6697	1427.66	27.3394	1455	0.01879	0.19036
		0.1149	2322	437	1885	874	2759	0.316781	0.316781		0.7853	1442.23	13.7655	1428.47	27.531	1456	0.0189086	0.19154
		0.1148	2323	438	1885	876	2761	0.317276	0.317047		0.7851	1443.14	13.8619	1429.28	27.7237	1457	0.0190279	0.192725
		0.1146	2324	438	1886	876	2762	0.317161	0.317047		0.7843	1444.04	13.9588	1430.08	27.9176	1458	0.0191479	0.193914
		0.1143	2325	438	1887	876	2763	0.317047	0.317047		0.7833	1444.94	14.0564	1430.89	28.1127	1459	0.0192685	0.195107
		0.1141	2325	439	1886	878	2764	0.317656	0.317426		0.7819	1445.85	14.1545	1431.69	28.309	1460	0.0193898	0.196305
		0.114	2326	439	1887	878	2765	0.317541	0.317426		0.7812	1446.75	14.2533	1432.49	28.5065	1461	0.0195117	0.197507
		0.1139	2327	439	1888	878	2766	0.317426	0.317426		0.7806	1447.65	14.3526	1433.29	28.7053	1462	0.0196342	0.198714
		0.1138	2327	440	1887	880	2767	0.318034	0.318034		0.7797	1448.55	14.4526	1434.09	28.9052	1463	0.0197575	0.199925
		0.1136	2327	441	1886	882	2768	0.318642	0.318527		0.7785	1449.45	14.5532	1434.89	29.1063	1464	0.0198814	0.20114
		0.1134	2328	441	1887	882	2769	0.318527	0.318527		0.7741	1450.35	14.6543	1435.69	29.3087	1465	0.0200059	0.20297
		0.1133	2328	442	1886	884	2770	0.319134	0.319018		0.7741	1451.24	14.7561	1436.49	29.5123	1466	0.0201312	0.20297
		0.1131	2329	442	1887	884	2771	0.319018	0.319018		0.772	1452.14	14.8585	1437.28	29.7171	1467	0.020257	0.204811
		0.1127	2329	443	1886	886	2772	0.319625	0.319164		0.7702	1453.04	14.9616	1438.08	29.9231	1468	0.0203836	0.20666
		0.1126	2330	443	1887	886	2773	0.31951	0.319164		0.7702	1453.93	15.0652	1438.87	30.1304	1469	0.0205108	0.20666
		0.1125	2332	443	1889	886	2775	0.319279	0.319164		0.7657	1454.83	15.1695	1439.66	30.3389	1470	0.0206387	0.20852
		0.1124	2333	443	1890	886	2776	0.319164	0.319164		0.7652	1455.73	15.2743	1440.45	30.5487	1471	0.0207673	0.209764
		0.1122	2334	444	1890	888	2778	0.319654	0.319424		0.7618	1456.62	15.3798	1441.24	30.7597	1472	0.0208965	0.211013
		0.1121	2336	444	1892	888	2780	0.319424	0.319424		0.7609	1457.51	15.486	1442.03	30.972	1473	0.0210265	0.212265
		0.112	2337	445	1892	890	2782	0.319914	0.319799		0.758	1458.41	15.5927	1442.81	31.1855	1474	0.021157	0.213522
		0.1119	2338	445	1893	890	2783	0.319799	0.319799		0.7507	1459.3	15.7001	1443.6	31.4003	1475	0.0212883	0.214782
		0.1118	2338	446	1892	892	2784	0.320402	0.320402		0.7497	1460.19	15.8082	1444.38	31.6163	1476	0.0214203	0.216047
		0.1117	2339	447	1892	894	2786	0.32089	0.32089		0.7492	1461.08	15.9168	1445.17	31.8336	1477	0.0215529	0.217316
		0.1116	2339	448	1891	896	2787	0.321493	0.321493		0.7455	1461.97	16.0261	1445.95	32.0522	1478	0.0216862	0.218588
		0.1115	2339	449	1890	898	2788	0.322095	0.321979		0.7453	1462.86	16.136	1446.73	32.2721	1479	0.0218202	0.219864
		0.1113	2340	449	1891	898	2789	0.321979	0.321979		0.7443	1463.75	16.2466	1447.51	32.4932	1480	0.0219549	0.221785
		0.111	2340	450	1890	900	2790	0.322581	0.322581		0.7443	1464.64	16.3578	1448.28	32.7157	1481	0.0220902	0.221785
		0.1108	2340	451	1889	902	2791	0.323182	0.323066		0.742	1465.53	16.4697	1449.06	32.9394	1482	0.0222263	0.223715
		0.1107	2341	451	1890	902	2792	0.323066	0.323066		0.7412	1466.42	16.5822	1449.84	33.1644	1483	0.022363	0.225007
		0.1106	2341	452	1889	904	2793	0.323666	0.323666		0.7402	1467.3	16.6953	1450.61	33.3907	1484	0.0225005	0.226301
		0.1105	2342	453	1889	906	2795	0.32415	0.323918		0.7397	1468.19	16.8091	1451.38	33.6183	1485	0.0226386	0.2276
		0.1103	2343	453	1890	906	2796	0.324034	0.323918		0.7384	1469.08	16.9236	1452.15	33.8472	1486	0.0227774	0.228902
		0.1102	2344	453	1891	906	2797	0.323918	0.323918		0.7382	1469.96	17.0387	1452.92	34.0774	1487	0.0229169	0.230208
		0.1101	2345	456	1889	912	2801	0.325598	0.325598		0.7352	1470.85	17.1545	1453.69	34.3089	1488	0.0230571	0.231517
		0.1099	2346	457	1889	914	2803	0.326079	0.326079		0.7306	1471.73	17.2709	1454.46	34.5417	1489	0.0231979	0.232829
		0.1098	2346	458	1888	916	2804	0.326676	0.326443		0.7282	1472.61	17.3879	1455.22	34.7759	1490	0.0233395	0.234145
		0.1097	2348	458	1890	916	2806	0.326443	0.326443		0.7259	1473.49	17.5057	1455.99	35.0113	1491	0.0234818	0.235465
		0.1094	2348	459	1889	918	2807	0.32704	0.326923		0.7237	1474.38	17.6241	1456.75	35.2481	1492	0.0236248	0.236788
		0.1093	2349	459	1890	918	2808	0.326923	0.326923		0.7212	1475.26	17.7431	1457.51	35.4862	1493	0.0237684	0.238114
		0.1092	2349	460	1889	920	2809	0.327519	0.327519		0.7187	1476.14	17.8628	1458.27	35.7257	1494	0.0239128	0.239443
		0.109	2349	461	1888	922	2810	0.328114	0.328114		0.7185	1477.02	17.9832	1459.03	35.9665	1495	0.0240578	0.240776
		0.1089	2350	462	1888	924	2812	0.328592	0.328592		0.7159	1477.9	18.1043	1459.79	36.2086	1496	0.0242036	0.242111
		0.1088	2350	463	1887	926	2813	0.329186	0.329186		0.7147	1478.77	18.226	1460.55	36.452	1497	0.0243501	0.24345
		0.1087	2350	464	1886	928	2814	0.32978	0.32978		0.7116	1479.65	18.3484	1461.3	36.6968	1498	0.0244972	0.244792
		0.1082	2350	465	1885	930	2815	0.330373	0.330256		0.7082	1480.53	18.4715	1462.06	36.943	1499	0.0246451	0.246137
		0.1081	2351	465	1886	930	2816	0.330256	0.330256		0.7055	1481.4	18.5952	1462.81	37.1904	1500	0.0247936	0.247485
		0.1079	2351	466	1885	932	2817	0.330848	0.330496		0.7049	1482.28	18.7196	1463.56	37.4393	1501	0.0249429	0.248836
		0.1078	2353	466	1887	932	2819	0.330614	0.330496		0.7039	1483.16	18.8447	1464.31	37.6895	1502	0.0250929	0.25019
		0.1077	2354	466	1888	932	2820	0.330496	0.330496		0.7011	1484.03	18.9705	1465.06	37.941	1503	0.0252435	0.251547
		0.1075	2355	467	1888	934	2822	0.330971	0.330971		0.701	1484.9	19.097	1465.81	38.1939	1504	0.0253949	0.252906
		0.1073	2355	469	1886	938	2824	0.332153	0.332035		0.6969	1485.78	19.2241	1466.55	38.4482	1505	0.025547	0.254269
		0.1072	2356	469	1887	938	2825	0.332035	0.332035		0.6962	1486.65	19.3519	1467.3	38.7038	1506	0.0256998	0.255634
		0.1071	2356	470	1886	940	2826	0.332626	0.332626		0.6961	1487.52	19.4804	1468.04	38.9608	1507	0.0258532	0.257002
		0.107	2356	471	1885	942	2827	0.333215	0.333215		0.692	1488.39	19.6096	1468.78	39.2192	1508	0.0260074	0.258372
		0.1069	2356	472	1884	944	2828	0.333805	0.333805		0.6919	1489.26	19.7395	1469.52	39.4789	1509	0.0261623	0.259745
		0.1068	2358	473	1885	946	2831	0.334158	0.334158		0.691	1490.13	19.87	1470.26	39.7401	1510	0.0263179	0.261121
		0.1067	2358	474	1884	948	2832	0.334746	0.334628		0.6882	1491	20.0013	1471	40.0026	1511	0.0264742	0.262498
		0.1064	2359	474	1885	948	2833	0.334628	0.334628		0.6872	1491.87	20.1332	1471.73	40.2664	1512	0.0266312	0.263879
		0.1062	2359	475	1884	950	2834	0.335215	0.335215		0.6866	1492.73	20.2659	1472.47	40.5317	1513	0.026789	0.265262
		0.1059	2360	476	1884	952	2836	0.335684	0.335566		0.6841	1493.6	20.3992	1473.2	40.7984	1514	0.0269474	0.268034
		0.1058	2361	476	1885	952	2837	0.335566	0.335566		0.6841	1494.47	20.5332	1473.93	41.0664	1515	0.0271065	0.268034
[truncated: 3,011 more rows]

## Sheet: Spectral Level Data
Spectral Level Data		Confidence Threshold	Forward	Reverse	Correct	Incorrect	Total	Global FDR	q-value		Fit Confidence Threshold	Fit Forward	Fit Reverse	Fit Correct	Fit Incorrect	Fit Total	Fit Global FDR	Fit Local FDR
[truncated: 11,586 more rows]

[truncated: 13 more sheets: Search Summary, Advanced Metadata, Speed and Distribution Analysis, Single Results Table, Protein FDR Summary, Distinct Peptide FDR Summary, Spectrum FDR Summary, PDST Controls, Protein Summary, Peptide Summary, Distinct Peptide Summary, Feature Summary, Single Column Summary]
