# Supplementary material for: In vivo proteomic mapping through GFP-directed proximity-dependent biotin labelling in zebrafish
Source: eLife. 2021 Feb 16;10:e64631. doi: 10.7554/eLife.64631 (PMC7906605; doi:10.7554/eLife.64631)
Supplement: Figure 5—source data 5. [file elife-64631-fig5-data5.xlsx]

## Sheet: Metadata
_RESULTS_version	5
RESULTS_SEARCH_STAT_search_begin_time_clock	01/19/2021 16:10:26
RESULTS_SEARCH_STAT_search_end_time_clock	01/20/2021 19:25:57
RESULTS_SEARCH_STAT_search_time_duration	#VALUE!
RESULTS_SEARCH_STAT_stage_signal_processing_begin_time_clock	01/19/2021 16:10:26
RESULTS_SEARCH_STAT_stage_signal_processing_end_time_clock	01/20/2021 16:18:19
RESULTS_SEARCH_STAT_stage_signal_processing_time_duration	#VALUE!
RESULTS_SEARCH_STAT_stage_waiting_begin_time_clock	01/20/2021 16:18:19
RESULTS_SEARCH_STAT_stage_waiting_end_time_clock	01/20/2021 16:21:18
RESULTS_SEARCH_STAT_stage_waiting_time_duration	2389-05-26
RESULTS_SEARCH_STAT_stage_searching_begin_time_clock	01/20/2021 16:21:18
RESULTS_SEARCH_STAT_stage_searching_end_time_clock	01/20/2021 18:27:50
RESULTS_SEARCH_STAT_stage_searching_time_duration	#VALUE!
RESULTS_SEARCH_STAT_stage_fdr_begin_time_clock	01/20/2021 18:27:51
RESULTS_SEARCH_STAT_stage_fdr_end_time_clock	01/20/2021 19:25:57
RESULTS_SEARCH_STAT_stage_fdr_time_duration	#VALUE!
RESULTS_SEARCH_STAT_task_fraglet_exe_begin_time_clock	01/20/2021 16:39:22
RESULTS_SEARCH_STAT_task_fraglet_exe_end_time_clock	01/20/2021 17:58:07
RESULTS_SEARCH_STAT_task_fraglet_exe_time_duration	4725486
RESULTS_SEARCH_STAT_task_fraglet_exe_time_cpu	#VALUE!
RESULTS_SEARCH_STAT_task_taglet_exe_begin_time_clock	01/20/2021 18:02:29
RESULTS_SEARCH_STAT_task_taglet_exe_end_time_clock	01/20/2021 18:19:53
RESULTS_SEARCH_STAT_task_taglet_exe_time_duration	1043290
RESULTS_SEARCH_STAT_task_taglet_exe_time_cpu	#VALUE!
RESULTS_SEARCH_STAT_task_progroup_begin_time_clock	01/20/2021 18:19:53
RESULTS_SEARCH_STAT_task_progroup_end_time_clock	01/20/2021 18:27:50
RESULTS_SEARCH_STAT_task_progroup_time_duration	476894
RESULTS_SEARCH_STAT_task_progroup_time_cpu	3287-09-11
RESULTS_SEARCH_STAT_task_focusing_begin_time_clock	01/20/2021 17:58:07
RESULTS_SEARCH_STAT_task_focusing_end_time_clock	01/20/2021 18:02:29
RESULTS_SEARCH_STAT_task_focusing_time_duration	261996
RESULTS_SEARCH_STAT_task_focusing_time_cpu	296448
RESULTS_SEARCH_STAT_computer_memory	32767
RESULTS_SEARCH_STAT_computer_name	IMB-MASS02
RESULTS_SEARCH_STAT_num_proteins	150424
RESULTS_SEARCH_STAT_num_residues	75708562
RESULTS_SEARCH_STAT_number_cores	8
RESULTS_SEARCH_STAT_number_licensed_tasks	16
RESULTS_SEARCH_STAT_number_processors	8
RESULTS_SEARCH_STAT_os	Windows Server 2008 R2 Standard (6.1.7600)
RESULTS_SEARCH_1_time_cpu	240054
RESULTS_SEARCH_1_time_duration	271044
RESULTS_SEARCH_1_version	5.0.1.4874
RESULTS_SEARCH_1_xml:id	SEARCH:1:637466694135747474_0
RESULTS_SEARCH_1_PARAMETERS_chemical_data_edited	FALSE
RESULTS_SEARCH_1_PARAMETERS_do_multiprecursor_search	TRUE
RESULTS_SEARCH_1_PARAMETERS_do_reverse_search	TRUE
RESULTS_SEARCH_1_PARAMETERS_max_quant_labels	35
RESULTS_SEARCH_1_PARAMETERS_maxresults	15
RESULTS_SEARCH_1_PARAMETERS_separate_searches	FALSE
RESULTS_SEARCH_1_PARAMETERS_MSTOLERANCE_type	dalton
RESULTS_SEARCH_1_PARAMETERS_MSTOLERANCE_value	0.05
RESULTS_SEARCH_1_PARAMETERS_MSMSTOLERANCE_type	dalton
RESULTS_SEARCH_1_PARAMETERS_MSMSTOLERANCE_value	0.1
RESULTS_SEARCH_1_PARAMETERS_MS_STANDARD_DEVIATION_type	dalton
RESULTS_SEARCH_1_PARAMETERS_MS_STANDARD_DEVIATION_value	0.0011
RESULTS_SEARCH_1_PARAMETERS_MSMS_STANDARD_DEVIATION_type	dalton
RESULTS_SEARCH_1_PARAMETERS_MSMS_STANDARD_DEVIATION_value	0.01
RESULTS_SEARCH_1_PARAMETERS_FASTA_filename	C:\AB SCIEX\ProteinPilot Data\SearchDatabases\uniprot-zebrafish_with_Clover.fasta
RESULTS_SEARCH_1_PARAMETERS_AUTO_CALIBRATION_ms	TRUE
RESULTS_SEARCH_1_PARAMETERS_AUTO_CALIBRATION_msexport	FALSE
RESULTS_SEARCH_1_PARAMETERS_AUTO_CALIBRATION_msms	TRUE
RESULTS_SEARCH_1_PARAMETERS_AUTO_CALIBRATION_msmstolsdratio	2.75
RESULTS_SEARCH_1_PARAMETERS_AUTO_CALIBRATION_mstolsdratio	7
RESULTS_SEARCH_1_PARAMETERS_AUTO_CALIBRATION_squareroot	TRUE
RESULTS_SEARCH_1_PARAMETERS_AUTO_CALIBRATION_type	dalton
RESULTS_SEARCH_1_PARAMETERS_AUTO_CALIBRATION_MCP_d_s_s_f	0.0666667
RESULTS_SEARCH_1_PARAMETERS_AUTO_CALIBRATION_MCP_d_s_w_f	3
RESULTS_SEARCH_1_PARAMETERS_AUTO_CALIBRATION_MCP_m_f_r_mbc	200
RESULTS_SEARCH_1_PARAMETERS_AUTO_CALIBRATION_MCP_m_m_c	10
RESULTS_SEARCH_1_PARAMETERS_AUTO_CALIBRATION_MCP_m_m_f_s	0.25
RESULTS_SEARCH_1_PARAMETERS_AUTO_CALIBRATION_MCP_m_m_p_f	0.33
RESULTS_SEARCH_1_PARAMETERS_AUTO_CALIBRATION_MCP_m_m_p_rms_f	1
RESULTS_SEARCH_1_PARAMETERS_AUTO_CALIBRATION_MCP_m_p_t_f	1
RESULTS_SEARCH_1_PARAMETERS_AUTO_CALIBRATION_MCP_m_r_h_n_b	15
RESULTS_SEARCH_1_PARAMETERS_AUTO_CALIBRATION_MCP_m_z_n_s	99
RESULTS_SEARCH_1_PARAMETERS_AUTO_CALIBRATION_MCP_m_z_s_mn_f_r	0.0666667
RESULTS_SEARCH_1_PARAMETERS_AUTO_CALIBRATION_MCP_m_z_s_mx_f_r	0.1
RESULTS_SEARCH_1_PARAMETERS_MS_AUTO_CALIBRATION_OUT_avres	-2.05268e-10
RESULTS_SEARCH_1_PARAMETERS_MS_AUTO_CALIBRATION_OUT_c0	0.000138151
RESULTS_SEARCH_1_PARAMETERS_MS_AUTO_CALIBRATION_OUT_c1minus1	-7.47957e-06
RESULTS_SEARCH_1_PARAMETERS_MS_AUTO_CALIBRATION_OUT_c2	0
RESULTS_SEARCH_1_PARAMETERS_MS_AUTO_CALIBRATION_OUT_file	1
RESULTS_SEARCH_1_PARAMETERS_MS_AUTO_CALIBRATION_OUT_partnumber	1
RESULTS_SEARCH_1_PARAMETERS_MS_AUTO_CALIBRATION_OUT_polyorder	1
RESULTS_SEARCH_1_PARAMETERS_MS_AUTO_CALIBRATION_OUT_sample	1
RESULTS_SEARCH_1_PARAMETERS_MS_AUTO_CALIBRATION_OUT_squareroot	TRUE
RESULTS_SEARCH_1_PARAMETERS_MSMS_AUTO_CALIBRATION_OUT_avres	-7.83545e-08
RESULTS_SEARCH_1_PARAMETERS_MSMS_AUTO_CALIBRATION_OUT_c0	-3.21881e-05
RESULTS_SEARCH_1_PARAMETERS_MSMS_AUTO_CALIBRATION_OUT_c1minus1	-3.30114e-07
RESULTS_SEARCH_1_PARAMETERS_MSMS_AUTO_CALIBRATION_OUT_c2	0
RESULTS_SEARCH_1_PARAMETERS_MSMS_AUTO_CALIBRATION_OUT_file	1
RESULTS_SEARCH_1_PARAMETERS_MSMS_AUTO_CALIBRATION_OUT_partnumber	1
RESULTS_SEARCH_1_PARAMETERS_MSMS_AUTO_CALIBRATION_OUT_polyorder	1
RESULTS_SEARCH_1_PARAMETERS_MSMS_AUTO_CALIBRATION_OUT_sample	1
RESULTS_SEARCH_1_PARAMETERS_MSMS_AUTO_CALIBRATION_OUT_squareroot	TRUE
RESULTS_SEARCH_1_PARAMETERS_MAX_PRECURSORS_FRAGLET	5
RESULTS_SEARCH_1_PARAMETERS_MAX_PRECURSORS_TAGLET	1
RESULTS_SEARCH_1_PARAMETERS_PRECURSORS_DR_FRAGLET	10
RESULTS_SEARCH_1_PARAMETERS_PRECURSORS_DR_TAGLET	3
RESULTS_SEARCH_1_PARAMETERS_DEFAULT_CHARGE_STATE_1_charge	2
RESULTS_SEARCH_1_PARAMETERS_DEFAULT_CHARGE_STATE_1_probability	1
RESULTS_SEARCH_1_PARAMETERS_DEFAULT_CHARGE_STATE_2_charge	3
RESULTS_SEARCH_1_PARAMETERS_DEFAULT_CHARGE_STATE_2_probability	1
RESULTS_SEARCH_1_PARAMETERS_DEFAULT_CHARGE_STATE_3_charge	4
RESULTS_SEARCH_1_PARAMETERS_DEFAULT_CHARGE_STATE_3_probability	1
RESULTS_SEARCH_1_PARAMETERS_VERSION	5.0.1.0, 4895
RESULTS_SEARCH_1_PARAMETERS_PARAGON_VERSION	5.0.1.0, 4874
RESULTS_SEARCH_1_PARAMETERS_APPLICATION	ProteinPilot(tm) Software
RESULTS_SEARCH_1_PARAMETERS_PROGROUP_alternativedispositionmaximumfoldprobabilitydrop	100
RESULTS_SEARCH_1_PARAMETERS_PROGROUP_alternativedispositionmaximumfoldscoredrop	2
RESULTS_SEARCH_1_PARAMETERS_PROGROUP_autodiscordantpeptidethreshold	0.3
RESULTS_SEARCH_1_PARAMETERS_PROGROUP_bayesconfidencecalclulation	TRUE
RESULTS_SEARCH_1_PARAMETERS_PROGROUP_calibrateconfidence	TRUE
RESULTS_SEARCH_1_PARAMETERS_PROGROUP_compresspeptides	FALSE
RESULTS_SEARCH_1_PARAMETERS_PROGROUP_confidencepercentthresholdforexcludingothersfromquant	15
RESULTS_SEARCH_1_PARAMETERS_PROGROUP_confidencepercentthresholdforincludingselfinquant	15
RESULTS_SEARCH_1_PARAMETERS_PROGROUP_donotstoremspeaklists	FALSE
RESULTS_SEARCH_1_PARAMETERS_PROGROUP_fasta	C:\AB SCIEX\ProteinPilot Data\SearchDatabases\uniprot-zebrafish_with_Clover.fasta
RESULTS_SEARCH_1_PARAMETERS_PROGROUP_featuregroupminpepconf	0.66
RESULTS_SEARCH_1_PARAMETERS_PROGROUP_featuregroupminups	0.47
RESULTS_SEARCH_1_PARAMETERS_PROGROUP_focusingintersection	4
RESULTS_SEARCH_1_PARAMETERS_PROGROUP_focusingminimummatchconfidence	0.1
RESULTS_SEARCH_1_PARAMETERS_PROGROUP_focusingminunusedprotscore	0.1
RESULTS_SEARCH_1_PARAMETERS_PROGROUP_focusingsubsetcutoff	6
RESULTS_SEARCH_1_PARAMETERS_PROGROUP_intersection	1.3
RESULTS_SEARCH_1_PARAMETERS_PROGROUP_minimummatchconfidencecutoff	0.001
RESULTS_SEARCH_1_PARAMETERS_PROGROUP_minunusedprotscore	0.0458
RESULTS_SEARCH_1_PARAMETERS_PROGROUP_subsetcutoff	2
RESULTS_SEARCH_1_PARAMETERS_PROGROUP_unusedprotscorethresholdforexcludingothersfromquant	1.3
RESULTS_SEARCH_1_PARAMETERS_PEAKLIST_count	1910-12-10
RESULTS_SEARCH_1_PARAMETERS_PEAKLIST_filenumber	1
RESULTS_SEARCH_1_PARAMETERS_PEAKLIST_original_count	3997
RESULTS_SEARCH_1_PARAMETERS_PEAKLIST_originalfilename	C:\AB SCIEX\ProteinPilot Data\Results\Albert\ZX 20200624 6600\ZX 20200624 C4B 1.wiff
RESULTS_SEARCH_1_PARAMETERS_PEAKLIST_partnumber	1
RESULTS_SEARCH_1_PARAMETERS_QUANT_TYPE_background_correction	FALSE
RESULTS_SEARCH_1_PARAMETERS_QUANT_TYPE_bias_correction	TRUE
RESULTS_SEARCH_1_PARAMETERS_QUANT_TYPE_keep_extreme_peptides_over_fraction	0
RESULTS_SEARCH_1_PARAMETERS_QUANT_TYPE_low_confidence_check	TRUE
RESULTS_SEARCH_1_PARAMETERS_QUANT_TYPE_low_intensity_check	TRUE
RESULTS_SEARCH_1_PARAMETERS_QUANT_TYPE_median_statistic	TRUE
RESULTS_SEARCH_1_PARAMETERS_QUANT_TYPE_mod_check	TRUE
RESULTS_SEARCH_1_PARAMETERS_QUANT_TYPE_quant_threshold	-1
RESULTS_SEARCH_1_PARAMETERS_QUANT_TYPE_quant_threshold_sn	9
RESULTS_SEARCH_1_PARAMETERS_QUANT_TYPE_separate_searches	FALSE
RESULTS_SEARCH_1_PARAMETERS_QUANT_TYPE_shared_msms_check	TRUE
RESULTS_SEARCH_1_PARAMETERS_PARAGON_METHOD_SETTINGS_UI_SAMPLE_TYPE	Identification
RESULTS_SEARCH_1_PARAMETERS_PARAGON_METHOD_SETTINGS_UI_CYS_ALKYLATION	Iodoacetamide w other Cys mods possible
RESULTS_SEARCH_1_PARAMETERS_PARAGON_METHOD_SETTINGS_UI_DIGESTION	Trypsin + Lys C
RESULTS_SEARCH_1_PARAMETERS_PARAGON_METHOD_SETTINGS_UI_SPECIAL_FACTOR	Gel-based ID
RESULTS_SEARCH_1_PARAMETERS_PARAGON_METHOD_SETTINGS_UI_INSTRUMENT	TripleTOF 6600
RESULTS_SEARCH_1_PARAMETERS_PARAGON_METHOD_SETTINGS_UI_SEARCH_EFFORT	Thorough
RESULTS_SEARCH_1_PARAMETERS_PARAGON_METHOD_SETTINGS_UI_USER_NAME	IMB-MASS02\massuser
RESULTS_SEARCH_1_PARAMETERS_PARAGON_METHOD_SETTINGS_UI_MACHINE_NAME	IMB-MASS02
RESULTS_SEARCH_1_PARAMETERS_PARAGON_METHOD_SETTINGS_UI_SEARCH_ID	6.37467e+17
RESULTS_SEARCH_1_PARAMETERS_PARAGON_METHOD_SETTINGS_UI_START_TIME	2021-01-19 16:10:26
RESULTS_SEARCH_1_PARAMETERS_PARAGON_METHOD_SETTINGS_UI_MIN_UNUSED_PROTSCORE	0.0458
RESULTS_SEARCH_1_PARAMETERS_PARAGON_METHOD_SETTINGS_UI_PSPEP	TRUE
RESULTS_SEARCH_2_time_cpu	231583
RESULTS_SEARCH_2_time_duration	231715
RESULTS_SEARCH_2_version	5.0.1.4874
RESULTS_SEARCH_2_xml:id	SEARCH:2:637466694135747474_0
RESULTS_SEARCH_2_PARAMETERS_chemical_data_edited	FALSE
RESULTS_SEARCH_2_PARAMETERS_do_multiprecursor_search	TRUE
RESULTS_SEARCH_2_PARAMETERS_do_reverse_search	TRUE
RESULTS_SEARCH_2_PARAMETERS_max_quant_labels	35
RESULTS_SEARCH_2_PARAMETERS_maxresults	15
RESULTS_SEARCH_2_PARAMETERS_separate_searches	FALSE
RESULTS_SEARCH_2_PARAMETERS_MSTOLERANCE_type	dalton
RESULTS_SEARCH_2_PARAMETERS_MSTOLERANCE_value	0.05
RESULTS_SEARCH_2_PARAMETERS_MSMSTOLERANCE_type	dalton
RESULTS_SEARCH_2_PARAMETERS_MSMSTOLERANCE_value	0.1
RESULTS_SEARCH_2_PARAMETERS_MS_STANDARD_DEVIATION_type	dalton
RESULTS_SEARCH_2_PARAMETERS_MS_STANDARD_DEVIATION_value	0.0011
RESULTS_SEARCH_2_PARAMETERS_MSMS_STANDARD_DEVIATION_type	dalton
RESULTS_SEARCH_2_PARAMETERS_MSMS_STANDARD_DEVIATION_value	0.01
RESULTS_SEARCH_2_PARAMETERS_FASTA_filename	C:\AB SCIEX\ProteinPilot Data\SearchDatabases\uniprot-zebrafish_with_Clover.fasta
RESULTS_SEARCH_2_PARAMETERS_AUTO_CALIBRATION_ms	TRUE
RESULTS_SEARCH_2_PARAMETERS_AUTO_CALIBRATION_msexport	FALSE
RESULTS_SEARCH_2_PARAMETERS_AUTO_CALIBRATION_msms	TRUE
RESULTS_SEARCH_2_PARAMETERS_AUTO_CALIBRATION_msmstolsdratio	2.75
RESULTS_SEARCH_2_PARAMETERS_AUTO_CALIBRATION_mstolsdratio	7
RESULTS_SEARCH_2_PARAMETERS_AUTO_CALIBRATION_squareroot	TRUE
RESULTS_SEARCH_2_PARAMETERS_AUTO_CALIBRATION_type	dalton
RESULTS_SEARCH_2_PARAMETERS_AUTO_CALIBRATION_MCP_d_s_s_f	0.0666667
RESULTS_SEARCH_2_PARAMETERS_AUTO_CALIBRATION_MCP_d_s_w_f	3
RESULTS_SEARCH_2_PARAMETERS_AUTO_CALIBRATION_MCP_m_f_r_mbc	200
RESULTS_SEARCH_2_PARAMETERS_AUTO_CALIBRATION_MCP_m_m_c	10
RESULTS_SEARCH_2_PARAMETERS_AUTO_CALIBRATION_MCP_m_m_f_s	0.25
RESULTS_SEARCH_2_PARAMETERS_AUTO_CALIBRATION_MCP_m_m_p_f	0.33
RESULTS_SEARCH_2_PARAMETERS_AUTO_CALIBRATION_MCP_m_m_p_rms_f	1
RESULTS_SEARCH_2_PARAMETERS_AUTO_CALIBRATION_MCP_m_p_t_f	1
RESULTS_SEARCH_2_PARAMETERS_AUTO_CALIBRATION_MCP_m_r_h_n_b	15
RESULTS_SEARCH_2_PARAMETERS_AUTO_CALIBRATION_MCP_m_z_n_s	99
RESULTS_SEARCH_2_PARAMETERS_AUTO_CALIBRATION_MCP_m_z_s_mn_f_r	0.0666667
RESULTS_SEARCH_2_PARAMETERS_AUTO_CALIBRATION_MCP_m_z_s_mx_f_r	0.1
RESULTS_SEARCH_2_PARAMETERS_MS_AUTO_CALIBRATION_OUT_avres	-2.05268e-10
RESULTS_SEARCH_2_PARAMETERS_MS_AUTO_CALIBRATION_OUT_c0	0.000138151
RESULTS_SEARCH_2_PARAMETERS_MS_AUTO_CALIBRATION_OUT_c1minus1	-7.47957e-06
RESULTS_SEARCH_2_PARAMETERS_MS_AUTO_CALIBRATION_OUT_c2	0
RESULTS_SEARCH_2_PARAMETERS_MS_AUTO_CALIBRATION_OUT_file	1
RESULTS_SEARCH_2_PARAMETERS_MS_AUTO_CALIBRATION_OUT_partnumber	1900-01-01
RESULTS_SEARCH_2_PARAMETERS_MS_AUTO_CALIBRATION_OUT_polyorder	1
RESULTS_SEARCH_2_PARAMETERS_MS_AUTO_CALIBRATION_OUT_sample	1
RESULTS_SEARCH_2_PARAMETERS_MS_AUTO_CALIBRATION_OUT_squareroot	TRUE
RESULTS_SEARCH_2_PARAMETERS_MSMS_AUTO_CALIBRATION_OUT_avres	-7.83545e-08
RESULTS_SEARCH_2_PARAMETERS_MSMS_AUTO_CALIBRATION_OUT_c0	-3.21881e-05
RESULTS_SEARCH_2_PARAMETERS_MSMS_AUTO_CALIBRATION_OUT_c1minus1	-3.30114e-07
RESULTS_SEARCH_2_PARAMETERS_MSMS_AUTO_CALIBRATION_OUT_c2	0
RESULTS_SEARCH_2_PARAMETERS_MSMS_AUTO_CALIBRATION_OUT_file	1
RESULTS_SEARCH_2_PARAMETERS_MSMS_AUTO_CALIBRATION_OUT_partnumber	1
RESULTS_SEARCH_2_PARAMETERS_MSMS_AUTO_CALIBRATION_OUT_polyorder	1
RESULTS_SEARCH_2_PARAMETERS_MSMS_AUTO_CALIBRATION_OUT_sample	1
RESULTS_SEARCH_2_PARAMETERS_MSMS_AUTO_CALIBRATION_OUT_squareroot	TRUE
RESULTS_SEARCH_2_PARAMETERS_MAX_PRECURSORS_FRAGLET	5
RESULTS_SEARCH_2_PARAMETERS_MAX_PRECURSORS_TAGLET	1
RESULTS_SEARCH_2_PARAMETERS_PRECURSORS_DR_FRAGLET	10
RESULTS_SEARCH_2_PARAMETERS_PRECURSORS_DR_TAGLET	3
RESULTS_SEARCH_2_PARAMETERS_DEFAULT_CHARGE_STATE_1_charge	2
RESULTS_SEARCH_2_PARAMETERS_DEFAULT_CHARGE_STATE_1_probability	1
RESULTS_SEARCH_2_PARAMETERS_DEFAULT_CHARGE_STATE_2_charge	3
RESULTS_SEARCH_2_PARAMETERS_DEFAULT_CHARGE_STATE_2_probability	1
RESULTS_SEARCH_2_PARAMETERS_DEFAULT_CHARGE_STATE_3_charge	4
RESULTS_SEARCH_2_PARAMETERS_DEFAULT_CHARGE_STATE_3_probability	1
RESULTS_SEARCH_2_PARAMETERS_VERSION	5.0.1.0, 4895
RESULTS_SEARCH_2_PARAMETERS_PARAGON_VERSION	5.0.1.0, 4874
RESULTS_SEARCH_2_PARAMETERS_APPLICATION	ProteinPilot(tm) Software
RESULTS_SEARCH_2_PARAMETERS_PROGROUP_alternativedispositionmaximumfoldprobabilitydrop	100
RESULTS_SEARCH_2_PARAMETERS_PROGROUP_alternativedispositionmaximumfoldscoredrop	2
RESULTS_SEARCH_2_PARAMETERS_PROGROUP_autodiscordantpeptidethreshold	0.3
RESULTS_SEARCH_2_PARAMETERS_PROGROUP_bayesconfidencecalclulation	TRUE
RESULTS_SEARCH_2_PARAMETERS_PROGROUP_calibrateconfidence	TRUE
RESULTS_SEARCH_2_PARAMETERS_PROGROUP_compresspeptides	FALSE
RESULTS_SEARCH_2_PARAMETERS_PROGROUP_confidencepercentthresholdforexcludingothersfromquant	15
RESULTS_SEARCH_2_PARAMETERS_PROGROUP_confidencepercentthresholdforincludingselfinquant	15
RESULTS_SEARCH_2_PARAMETERS_PROGROUP_donotstoremspeaklists	FALSE
RESULTS_SEARCH_2_PARAMETERS_PROGROUP_fasta	C:\AB SCIEX\ProteinPilot Data\SearchDatabases\uniprot-zebrafish_with_Clover.fasta
RESULTS_SEARCH_2_PARAMETERS_PROGROUP_featuregroupminpepconf	0.66
RESULTS_SEARCH_2_PARAMETERS_PROGROUP_featuregroupminups	0.47
RESULTS_SEARCH_2_PARAMETERS_PROGROUP_focusingintersection	4
RESULTS_SEARCH_2_PARAMETERS_PROGROUP_focusingminimummatchconfidence	0.1
RESULTS_SEARCH_2_PARAMETERS_PROGROUP_focusingminunusedprotscore	0.1
RESULTS_SEARCH_2_PARAMETERS_PROGROUP_focusingsubsetcutoff	6
RESULTS_SEARCH_2_PARAMETERS_PROGROUP_intersection	1.3
RESULTS_SEARCH_2_PARAMETERS_PROGROUP_minimummatchconfidencecutoff	0.001
RESULTS_SEARCH_2_PARAMETERS_PROGROUP_minunusedprotscore	0.0458
RESULTS_SEARCH_2_PARAMETERS_PROGROUP_subsetcutoff	2
RESULTS_SEARCH_2_PARAMETERS_PROGROUP_unusedprotscorethresholdforexcludingothersfromquant	1.3
RESULTS_SEARCH_2_PARAMETERS_PEAKLIST_count	3997
RESULTS_SEARCH_2_PARAMETERS_PEAKLIST_filenumber	1
RESULTS_SEARCH_2_PARAMETERS_PEAKLIST_original_count	3997
RESULTS_SEARCH_2_PARAMETERS_PEAKLIST_originalfilename	C:\AB SCIEX\ProteinPilot Data\Results\Albert\ZX 20200624 6600\ZX 20200624 C4B 1.wiff
RESULTS_SEARCH_2_PARAMETERS_PEAKLIST_partnumber	1
RESULTS_SEARCH_2_PARAMETERS_QUANT_TYPE_background_correction	FALSE
RESULTS_SEARCH_2_PARAMETERS_QUANT_TYPE_bias_correction	TRUE
RESULTS_SEARCH_2_PARAMETERS_QUANT_TYPE_keep_extreme_peptides_over_fraction	0
RESULTS_SEARCH_2_PARAMETERS_QUANT_TYPE_low_confidence_check	TRUE
RESULTS_SEARCH_2_PARAMETERS_QUANT_TYPE_low_intensity_check	TRUE
RESULTS_SEARCH_2_PARAMETERS_QUANT_TYPE_median_statistic	TRUE
RESULTS_SEARCH_2_PARAMETERS_QUANT_TYPE_mod_check	TRUE
RESULTS_SEARCH_2_PARAMETERS_QUANT_TYPE_quant_threshold	-1
RESULTS_SEARCH_2_PARAMETERS_QUANT_TYPE_quant_threshold_sn	9
RESULTS_SEARCH_2_PARAMETERS_QUANT_TYPE_separate_searches	FALSE
RESULTS_SEARCH_2_PARAMETERS_QUANT_TYPE_shared_msms_check	TRUE
RESULTS_SEARCH_2_PARAMETERS_PARAGON_METHOD_SETTINGS_UI_SAMPLE_TYPE	Identification
RESULTS_SEARCH_2_PARAMETERS_PARAGON_METHOD_SETTINGS_UI_CYS_ALKYLATION	Iodoacetamide w other Cys mods possible
RESULTS_SEARCH_2_PARAMETERS_PARAGON_METHOD_SETTINGS_UI_DIGESTION	Trypsin + Lys C
RESULTS_SEARCH_2_PARAMETERS_PARAGON_METHOD_SETTINGS_UI_SPECIAL_FACTOR	Gel-based ID
RESULTS_SEARCH_2_PARAMETERS_PARAGON_METHOD_SETTINGS_UI_INSTRUMENT	TripleTOF 6600
RESULTS_SEARCH_2_PARAMETERS_PARAGON_METHOD_SETTINGS_UI_SEARCH_EFFORT	Thorough
RESULTS_SEARCH_2_PARAMETERS_PARAGON_METHOD_SETTINGS_UI_USER_NAME	IMB-MASS02\massuser
RESULTS_SEARCH_2_PARAMETERS_PARAGON_METHOD_SETTINGS_UI_MACHINE_NAME	IMB-MASS02
RESULTS_SEARCH_2_PARAMETERS_PARAGON_METHOD_SETTINGS_UI_SEARCH_ID	6.37467e+17
RESULTS_SEARCH_2_PARAMETERS_PARAGON_METHOD_SETTINGS_UI_START_TIME	2021-01-19 16:10:26
RESULTS_SEARCH_2_PARAMETERS_PARAGON_METHOD_SETTINGS_UI_MIN_UNUSED_PROTSCORE	0.0458
RESULTS_SEARCH_2_PARAMETERS_PARAGON_METHOD_SETTINGS_UI_PSPEP	TRUE
RESULTS_SEARCH_3_time_cpu	335480
RESULTS_SEARCH_3_time_duration	419796
RESULTS_SEARCH_3_version	5.0.1.4874
RESULTS_SEARCH_3_xml:id	SEARCH:1:637466694135747474_1
RESULTS_SEARCH_3_PARAMETERS_chemical_data_edited	FALSE
RESULTS_SEARCH_3_PARAMETERS_do_multiprecursor_search	TRUE
RESULTS_SEARCH_3_PARAMETERS_do_reverse_search	TRUE
RESULTS_SEARCH_3_PARAMETERS_max_quant_labels	35
RESULTS_SEARCH_3_PARAMETERS_maxresults	15
RESULTS_SEARCH_3_PARAMETERS_separate_searches	FALSE
RESULTS_SEARCH_3_PARAMETERS_MSTOLERANCE_type	dalton
RESULTS_SEARCH_3_PARAMETERS_MSTOLERANCE_value	0.05
RESULTS_SEARCH_3_PARAMETERS_MSMSTOLERANCE_type	dalton
RESULTS_SEARCH_3_PARAMETERS_MSMSTOLERANCE_value	0.1
RESULTS_SEARCH_3_PARAMETERS_MS_STANDARD_DEVIATION_type	dalton
RESULTS_SEARCH_3_PARAMETERS_MS_STANDARD_DEVIATION_value	0.0011
RESULTS_SEARCH_3_PARAMETERS_MSMS_STANDARD_DEVIATION_type	dalton
RESULTS_SEARCH_3_PARAMETERS_MSMS_STANDARD_DEVIATION_value	0.01
RESULTS_SEARCH_3_PARAMETERS_FASTA_filename	C:\AB SCIEX\ProteinPilot Data\SearchDatabases\uniprot-zebrafish_with_Clover.fasta
RESULTS_SEARCH_3_PARAMETERS_AUTO_CALIBRATION_ms	TRUE
RESULTS_SEARCH_3_PARAMETERS_AUTO_CALIBRATION_msexport	FALSE
RESULTS_SEARCH_3_PARAMETERS_AUTO_CALIBRATION_msms	TRUE
RESULTS_SEARCH_3_PARAMETERS_AUTO_CALIBRATION_msmstolsdratio	2.75
RESULTS_SEARCH_3_PARAMETERS_AUTO_CALIBRATION_mstolsdratio	7
RESULTS_SEARCH_3_PARAMETERS_AUTO_CALIBRATION_squareroot	TRUE
RESULTS_SEARCH_3_PARAMETERS_AUTO_CALIBRATION_type	dalton
RESULTS_SEARCH_3_PARAMETERS_AUTO_CALIBRATION_MCP_d_s_s_f	0.0666667
RESULTS_SEARCH_3_PARAMETERS_AUTO_CALIBRATION_MCP_d_s_w_f	3
RESULTS_SEARCH_3_PARAMETERS_AUTO_CALIBRATION_MCP_m_f_r_mbc	200
RESULTS_SEARCH_3_PARAMETERS_AUTO_CALIBRATION_MCP_m_m_c	10
RESULTS_SEARCH_3_PARAMETERS_AUTO_CALIBRATION_MCP_m_m_f_s	0.25
RESULTS_SEARCH_3_PARAMETERS_AUTO_CALIBRATION_MCP_m_m_p_f	0.33
RESULTS_SEARCH_3_PARAMETERS_AUTO_CALIBRATION_MCP_m_m_p_rms_f	1
RESULTS_SEARCH_3_PARAMETERS_AUTO_CALIBRATION_MCP_m_p_t_f	1
RESULTS_SEARCH_3_PARAMETERS_AUTO_CALIBRATION_MCP_m_r_h_n_b	15
RESULTS_SEARCH_3_PARAMETERS_AUTO_CALIBRATION_MCP_m_z_n_s	99
RESULTS_SEARCH_3_PARAMETERS_AUTO_CALIBRATION_MCP_m_z_s_mn_f_r	0.0666667
RESULTS_SEARCH_3_PARAMETERS_AUTO_CALIBRATION_MCP_m_z_s_mx_f_r	0.1
RESULTS_SEARCH_3_PARAMETERS_MAX_PRECURSORS_FRAGLET	5
RESULTS_SEARCH_3_PARAMETERS_MAX_PRECURSORS_TAGLET	1
RESULTS_SEARCH_3_PARAMETERS_PRECURSORS_DR_FRAGLET	10
RESULTS_SEARCH_3_PARAMETERS_PRECURSORS_DR_TAGLET	3
RESULTS_SEARCH_3_PARAMETERS_DEFAULT_CHARGE_STATE_1_charge	2
RESULTS_SEARCH_3_PARAMETERS_DEFAULT_CHARGE_STATE_1_probability	1
RESULTS_SEARCH_3_PARAMETERS_DEFAULT_CHARGE_STATE_2_charge	3
RESULTS_SEARCH_3_PARAMETERS_DEFAULT_CHARGE_STATE_2_probability	1
RESULTS_SEARCH_3_PARAMETERS_DEFAULT_CHARGE_STATE_3_charge	4
RESULTS_SEARCH_3_PARAMETERS_DEFAULT_CHARGE_STATE_3_probability	1
RESULTS_SEARCH_3_PARAMETERS_VERSION	5.0.1.0, 4895
RESULTS_SEARCH_3_PARAMETERS_PARAGON_VERSION	5.0.1.0, 4874
RESULTS_SEARCH_3_PARAMETERS_APPLICATION	ProteinPilot(tm) Software
RESULTS_SEARCH_3_PARAMETERS_PROGROUP_alternativedispositionmaximumfoldprobabilitydrop	100
RESULTS_SEARCH_3_PARAMETERS_PROGROUP_alternativedispositionmaximumfoldscoredrop	2
RESULTS_SEARCH_3_PARAMETERS_PROGROUP_autodiscordantpeptidethreshold	0.3
RESULTS_SEARCH_3_PARAMETERS_PROGROUP_bayesconfidencecalclulation	TRUE
RESULTS_SEARCH_3_PARAMETERS_PROGROUP_calibrateconfidence	TRUE
RESULTS_SEARCH_3_PARAMETERS_PROGROUP_compresspeptides	FALSE
RESULTS_SEARCH_3_PARAMETERS_PROGROUP_confidencepercentthresholdforexcludingothersfromquant	15
RESULTS_SEARCH_3_PARAMETERS_PROGROUP_confidencepercentthresholdforincludingselfinquant	15
RESULTS_SEARCH_3_PARAMETERS_PROGROUP_donotstoremspeaklists	FALSE
RESULTS_SEARCH_3_PARAMETERS_PROGROUP_fasta	C:\AB SCIEX\ProteinPilot Data\SearchDatabases\uniprot-zebrafish_with_Clover.fasta
RESULTS_SEARCH_3_PARAMETERS_PROGROUP_featuregroupminpepconf	0.66
RESULTS_SEARCH_3_PARAMETERS_PROGROUP_featuregroupminups	0.47
RESULTS_SEARCH_3_PARAMETERS_PROGROUP_focusingintersection	4
RESULTS_SEARCH_3_PARAMETERS_PROGROUP_focusingminimummatchconfidence	0.1
RESULTS_SEARCH_3_PARAMETERS_PROGROUP_focusingminunusedprotscore	0.1
RESULTS_SEARCH_3_PARAMETERS_PROGROUP_focusingsubsetcutoff	6
RESULTS_SEARCH_3_PARAMETERS_PROGROUP_intersection	1.3
RESULTS_SEARCH_3_PARAMETERS_PROGROUP_minimummatchconfidencecutoff	0.001
RESULTS_SEARCH_3_PARAMETERS_PROGROUP_minunusedprotscore	0.0458
RESULTS_SEARCH_3_PARAMETERS_PROGROUP_subsetcutoff	2
RESULTS_SEARCH_3_PARAMETERS_PROGROUP_unusedprotscorethresholdforexcludingothersfromquant	1.3
RESULTS_SEARCH_3_PARAMETERS_PEAKLIST_count	2698
RESULTS_SEARCH_3_PARAMETERS_PEAKLIST_filenumber	2
RESULTS_SEARCH_3_PARAMETERS_PEAKLIST_original_count	2698
RESULTS_SEARCH_3_PARAMETERS_PEAKLIST_originalfilename	C:\AB SCIEX\ProteinPilot Data\Results\Albert\ZX 20200624 6600\ZX 20200624 C4B 2.wiff
RESULTS_SEARCH_3_PARAMETERS_PEAKLIST_partnumber	2
RESULTS_SEARCH_3_PARAMETERS_QUANT_TYPE_background_correction	FALSE
RESULTS_SEARCH_3_PARAMETERS_QUANT_TYPE_bias_correction	TRUE
RESULTS_SEARCH_3_PARAMETERS_QUANT_TYPE_keep_extreme_peptides_over_fraction	0
RESULTS_SEARCH_3_PARAMETERS_QUANT_TYPE_low_confidence_check	TRUE
RESULTS_SEARCH_3_PARAMETERS_QUANT_TYPE_low_intensity_check	TRUE
RESULTS_SEARCH_3_PARAMETERS_QUANT_TYPE_median_statistic	TRUE
RESULTS_SEARCH_3_PARAMETERS_QUANT_TYPE_mod_check	TRUE
RESULTS_SEARCH_3_PARAMETERS_QUANT_TYPE_quant_threshold	-1
RESULTS_SEARCH_3_PARAMETERS_QUANT_TYPE_quant_threshold_sn	9
RESULTS_SEARCH_3_PARAMETERS_QUANT_TYPE_separate_searches	FALSE
RESULTS_SEARCH_3_PARAMETERS_QUANT_TYPE_shared_msms_check	TRUE
RESULTS_SEARCH_3_PARAMETERS_PARAGON_METHOD_SETTINGS_UI_SAMPLE_TYPE	Identification
RESULTS_SEARCH_3_PARAMETERS_PARAGON_METHOD_SETTINGS_UI_CYS_ALKYLATION	Iodoacetamide w other Cys mods possible
RESULTS_SEARCH_3_PARAMETERS_PARAGON_METHOD_SETTINGS_UI_DIGESTION	Trypsin + Lys C
RESULTS_SEARCH_3_PARAMETERS_PARAGON_METHOD_SETTINGS_UI_SPECIAL_FACTOR	Gel-based ID
RESULTS_SEARCH_3_PARAMETERS_PARAGON_METHOD_SETTINGS_UI_INSTRUMENT	TripleTOF 6600
RESULTS_SEARCH_3_PARAMETERS_PARAGON_METHOD_SETTINGS_UI_SEARCH_EFFORT	Thorough
RESULTS_SEARCH_3_PARAMETERS_PARAGON_METHOD_SETTINGS_UI_USER_NAME	IMB-MASS02\massuser
RESULTS_SEARCH_3_PARAMETERS_PARAGON_METHOD_SETTINGS_UI_MACHINE_NAME	IMB-MASS02
RESULTS_SEARCH_3_PARAMETERS_PARAGON_METHOD_SETTINGS_UI_SEARCH_ID	6.37467e+17
RESULTS_SEARCH_3_PARAMETERS_PARAGON_METHOD_SETTINGS_UI_START_TIME	2021-01-19 16:10:26
RESULTS_SEARCH_3_PARAMETERS_PARAGON_METHOD_SETTINGS_UI_MIN_UNUSED_PROTSCORE	0.0458
RESULTS_SEARCH_3_PARAMETERS_PARAGON_METHOD_SETTINGS_UI_PSPEP	TRUE
RESULTS_SEARCH_4_time_cpu	222738
RESULTS_SEARCH_4_time_duration	222854
RESULTS_SEARCH_4_version	5.0.1.4874
RESULTS_SEARCH_4_xml:id	SEARCH:2:637466694135747474_1
RESULTS_SEARCH_4_PARAMETERS_chemical_data_edited	FALSE
RESULTS_SEARCH_4_PARAMETERS_do_multiprecursor_search	TRUE
RESULTS_SEARCH_4_PARAMETERS_do_reverse_search	TRUE
RESULTS_SEARCH_4_PARAMETERS_max_quant_labels	35
RESULTS_SEARCH_4_PARAMETERS_maxresults	15
RESULTS_SEARCH_4_PARAMETERS_separate_searches	FALSE
RESULTS_SEARCH_4_PARAMETERS_MSTOLERANCE_type	dalton
RESULTS_SEARCH_4_PARAMETERS_MSTOLERANCE_value	0.05
RESULTS_SEARCH_4_PARAMETERS_MSMSTOLERANCE_type	dalton
RESULTS_SEARCH_4_PARAMETERS_MSMSTOLERANCE_value	0.1
RESULTS_SEARCH_4_PARAMETERS_MS_STANDARD_DEVIATION_type	dalton
RESULTS_SEARCH_4_PARAMETERS_MS_STANDARD_DEVIATION_value	0.0011
RESULTS_SEARCH_4_PARAMETERS_MSMS_STANDARD_DEVIATION_type	dalton
RESULTS_SEARCH_4_PARAMETERS_MSMS_STANDARD_DEVIATION_value	0.01
RESULTS_SEARCH_4_PARAMETERS_FASTA_filename	C:\AB SCIEX\ProteinPilot Data\SearchDatabases\uniprot-zebrafish_with_Clover.fasta
RESULTS_SEARCH_4_PARAMETERS_AUTO_CALIBRATION_ms	TRUE
RESULTS_SEARCH_4_PARAMETERS_AUTO_CALIBRATION_msexport	FALSE
RESULTS_SEARCH_4_PARAMETERS_AUTO_CALIBRATION_msms	TRUE
RESULTS_SEARCH_4_PARAMETERS_AUTO_CALIBRATION_msmstolsdratio	2.75
RESULTS_SEARCH_4_PARAMETERS_AUTO_CALIBRATION_mstolsdratio	7
RESULTS_SEARCH_4_PARAMETERS_AUTO_CALIBRATION_squareroot	TRUE
RESULTS_SEARCH_4_PARAMETERS_AUTO_CALIBRATION_type	dalton
RESULTS_SEARCH_4_PARAMETERS_AUTO_CALIBRATION_MCP_d_s_s_f	0.0666667
RESULTS_SEARCH_4_PARAMETERS_AUTO_CALIBRATION_MCP_d_s_w_f	3
RESULTS_SEARCH_4_PARAMETERS_AUTO_CALIBRATION_MCP_m_f_r_mbc	200
RESULTS_SEARCH_4_PARAMETERS_AUTO_CALIBRATION_MCP_m_m_c	10
RESULTS_SEARCH_4_PARAMETERS_AUTO_CALIBRATION_MCP_m_m_f_s	0.25
RESULTS_SEARCH_4_PARAMETERS_AUTO_CALIBRATION_MCP_m_m_p_f	0.33
RESULTS_SEARCH_4_PARAMETERS_AUTO_CALIBRATION_MCP_m_m_p_rms_f	1
RESULTS_SEARCH_4_PARAMETERS_AUTO_CALIBRATION_MCP_m_p_t_f	1
RESULTS_SEARCH_4_PARAMETERS_AUTO_CALIBRATION_MCP_m_r_h_n_b	15
RESULTS_SEARCH_4_PARAMETERS_AUTO_CALIBRATION_MCP_m_z_n_s	99
RESULTS_SEARCH_4_PARAMETERS_AUTO_CALIBRATION_MCP_m_z_s_mn_f_r	0.0666667
RESULTS_SEARCH_4_PARAMETERS_AUTO_CALIBRATION_MCP_m_z_s_mx_f_r	0.1
RESULTS_SEARCH_4_PARAMETERS_MAX_PRECURSORS_FRAGLET	5
RESULTS_SEARCH_4_PARAMETERS_MAX_PRECURSORS_TAGLET	1
RESULTS_SEARCH_4_PARAMETERS_PRECURSORS_DR_FRAGLET	10
RESULTS_SEARCH_4_PARAMETERS_PRECURSORS_DR_TAGLET	3
RESULTS_SEARCH_4_PARAMETERS_DEFAULT_CHARGE_STATE_1_charge	2
RESULTS_SEARCH_4_PARAMETERS_DEFAULT_CHARGE_STATE_1_probability	1
RESULTS_SEARCH_4_PARAMETERS_DEFAULT_CHARGE_STATE_2_charge	3
RESULTS_SEARCH_4_PARAMETERS_DEFAULT_CHARGE_STATE_2_probability	1
RESULTS_SEARCH_4_PARAMETERS_DEFAULT_CHARGE_STATE_3_charge	4
RESULTS_SEARCH_4_PARAMETERS_DEFAULT_CHARGE_STATE_3_probability	1
RESULTS_SEARCH_4_PARAMETERS_VERSION	5.0.1.0, 4895
RESULTS_SEARCH_4_PARAMETERS_PARAGON_VERSION	5.0.1.0, 4874
RESULTS_SEARCH_4_PARAMETERS_APPLICATION	ProteinPilot(tm) Software
RESULTS_SEARCH_4_PARAMETERS_PROGROUP_alternativedispositionmaximumfoldprobabilitydrop	100
RESULTS_SEARCH_4_PARAMETERS_PROGROUP_alternativedispositionmaximumfoldscoredrop	2
RESULTS_SEARCH_4_PARAMETERS_PROGROUP_autodiscordantpeptidethreshold	0.3
RESULTS_SEARCH_4_PARAMETERS_PROGROUP_bayesconfidencecalclulation	TRUE
RESULTS_SEARCH_4_PARAMETERS_PROGROUP_calibrateconfidence	TRUE
RESULTS_SEARCH_4_PARAMETERS_PROGROUP_compresspeptides	FALSE
RESULTS_SEARCH_4_PARAMETERS_PROGROUP_confidencepercentthresholdforexcludingothersfromquant	1900-01-15
RESULTS_SEARCH_4_PARAMETERS_PROGROUP_confidencepercentthresholdforincludingselfinquant	15
RESULTS_SEARCH_4_PARAMETERS_PROGROUP_donotstoremspeaklists	FALSE
RESULTS_SEARCH_4_PARAMETERS_PROGROUP_fasta	C:\AB SCIEX\ProteinPilot Data\SearchDatabases\uniprot-zebrafish_with_Clover.fasta
RESULTS_SEARCH_4_PARAMETERS_PROGROUP_featuregroupminpepconf	0.66
RESULTS_SEARCH_4_PARAMETERS_PROGROUP_featuregroupminups	0.47
RESULTS_SEARCH_4_PARAMETERS_PROGROUP_focusingintersection	4
RESULTS_SEARCH_4_PARAMETERS_PROGROUP_focusingminimummatchconfidence	0.1
RESULTS_SEARCH_4_PARAMETERS_PROGROUP_focusingminunusedprotscore	0.1
RESULTS_SEARCH_4_PARAMETERS_PROGROUP_focusingsubsetcutoff	6
RESULTS_SEARCH_4_PARAMETERS_PROGROUP_intersection	1.3
RESULTS_SEARCH_4_PARAMETERS_PROGROUP_minimummatchconfidencecutoff	0.001
RESULTS_SEARCH_4_PARAMETERS_PROGROUP_minunusedprotscore	0.0458
RESULTS_SEARCH_4_PARAMETERS_PROGROUP_subsetcutoff	2
RESULTS_SEARCH_4_PARAMETERS_PROGROUP_unusedprotscorethresholdforexcludingothersfromquant	1.3
RESULTS_SEARCH_4_PARAMETERS_PEAKLIST_count	2698
RESULTS_SEARCH_4_PARAMETERS_PEAKLIST_filenumber	2
RESULTS_SEARCH_4_PARAMETERS_PEAKLIST_original_count	2698
RESULTS_SEARCH_4_PARAMETERS_PEAKLIST_originalfilename	C:\AB SCIEX\ProteinPilot Data\Results\Albert\ZX 20200624 6600\ZX 20200624 C4B 2.wiff
RESULTS_SEARCH_4_PARAMETERS_PEAKLIST_partnumber	2
RESULTS_SEARCH_4_PARAMETERS_QUANT_TYPE_background_correction	FALSE
RESULTS_SEARCH_4_PARAMETERS_QUANT_TYPE_bias_correction	TRUE
RESULTS_SEARCH_4_PARAMETERS_QUANT_TYPE_keep_extreme_peptides_over_fraction	0
RESULTS_SEARCH_4_PARAMETERS_QUANT_TYPE_low_confidence_check	TRUE
RESULTS_SEARCH_4_PARAMETERS_QUANT_TYPE_low_intensity_check	TRUE
RESULTS_SEARCH_4_PARAMETERS_QUANT_TYPE_median_statistic	TRUE
RESULTS_SEARCH_4_PARAMETERS_QUANT_TYPE_mod_check	TRUE
RESULTS_SEARCH_4_PARAMETERS_QUANT_TYPE_quant_threshold	-1
RESULTS_SEARCH_4_PARAMETERS_QUANT_TYPE_quant_threshold_sn	9
RESULTS_SEARCH_4_PARAMETERS_QUANT_TYPE_separate_searches	FALSE
RESULTS_SEARCH_4_PARAMETERS_QUANT_TYPE_shared_msms_check	TRUE
RESULTS_SEARCH_4_PARAMETERS_PARAGON_METHOD_SETTINGS_UI_SAMPLE_TYPE	Identification
RESULTS_SEARCH_4_PARAMETERS_PARAGON_METHOD_SETTINGS_UI_CYS_ALKYLATION	Iodoacetamide w other Cys mods possible
RESULTS_SEARCH_4_PARAMETERS_PARAGON_METHOD_SETTINGS_UI_DIGESTION	Trypsin + Lys C
RESULTS_SEARCH_4_PARAMETERS_PARAGON_METHOD_SETTINGS_UI_SPECIAL_FACTOR	Gel-based ID
RESULTS_SEARCH_4_PARAMETERS_PARAGON_METHOD_SETTINGS_UI_INSTRUMENT	TripleTOF 6600
RESULTS_SEARCH_4_PARAMETERS_PARAGON_METHOD_SETTINGS_UI_SEARCH_EFFORT	Thorough
RESULTS_SEARCH_4_PARAMETERS_PARAGON_METHOD_SETTINGS_UI_USER_NAME	IMB-MASS02\massuser
RESULTS_SEARCH_4_PARAMETERS_PARAGON_METHOD_SETTINGS_UI_MACHINE_NAME	IMB-MASS02
RESULTS_SEARCH_4_PARAMETERS_PARAGON_METHOD_SETTINGS_UI_SEARCH_ID	6.37467e+17
RESULTS_SEARCH_4_PARAMETERS_PARAGON_METHOD_SETTINGS_UI_START_TIME	2021-01-19 16:10:26
RESULTS_SEARCH_4_PARAMETERS_PARAGON_METHOD_SETTINGS_UI_MIN_UNUSED_PROTSCORE	0.0458
RESULTS_SEARCH_4_PARAMETERS_PARAGON_METHOD_SETTINGS_UI_PSPEP	TRUE
RESULTS_SEARCH_5_time_cpu	344684
RESULTS_SEARCH_5_time_duration	381107
RESULTS_SEARCH_5_version	5.0.1.4874
RESULTS_SEARCH_5_xml:id	SEARCH:1:637466694135747474_2
RESULTS_SEARCH_5_PARAMETERS_chemical_data_edited	FALSE
RESULTS_SEARCH_5_PARAMETERS_do_multiprecursor_search	TRUE
RESULTS_SEARCH_5_PARAMETERS_do_reverse_search	TRUE
RESULTS_SEARCH_5_PARAMETERS_max_quant_labels	35
RESULTS_SEARCH_5_PARAMETERS_maxresults	15
RESULTS_SEARCH_5_PARAMETERS_separate_searches	FALSE
RESULTS_SEARCH_5_PARAMETERS_MSTOLERANCE_type	dalton
RESULTS_SEARCH_5_PARAMETERS_MSTOLERANCE_value	0.05
RESULTS_SEARCH_5_PARAMETERS_MSMSTOLERANCE_type	dalton
RESULTS_SEARCH_5_PARAMETERS_MSMSTOLERANCE_value	0.1
RESULTS_SEARCH_5_PARAMETERS_MS_STANDARD_DEVIATION_type	dalton
RESULTS_SEARCH_5_PARAMETERS_MS_STANDARD_DEVIATION_value	0.0011
RESULTS_SEARCH_5_PARAMETERS_MSMS_STANDARD_DEVIATION_type	dalton
RESULTS_SEARCH_5_PARAMETERS_MSMS_STANDARD_DEVIATION_value	0.01
RESULTS_SEARCH_5_PARAMETERS_FASTA_filename	C:\AB SCIEX\ProteinPilot Data\SearchDatabases\uniprot-zebrafish_with_Clover.fasta
RESULTS_SEARCH_5_PARAMETERS_AUTO_CALIBRATION_ms	TRUE
RESULTS_SEARCH_5_PARAMETERS_AUTO_CALIBRATION_msexport	FALSE
RESULTS_SEARCH_5_PARAMETERS_AUTO_CALIBRATION_msms	TRUE
RESULTS_SEARCH_5_PARAMETERS_AUTO_CALIBRATION_msmstolsdratio	2.75
RESULTS_SEARCH_5_PARAMETERS_AUTO_CALIBRATION_mstolsdratio	7
RESULTS_SEARCH_5_PARAMETERS_AUTO_CALIBRATION_squareroot	TRUE
RESULTS_SEARCH_5_PARAMETERS_AUTO_CALIBRATION_type	dalton
RESULTS_SEARCH_5_PARAMETERS_AUTO_CALIBRATION_MCP_d_s_s_f	0.0666667
RESULTS_SEARCH_5_PARAMETERS_AUTO_CALIBRATION_MCP_d_s_w_f	3
RESULTS_SEARCH_5_PARAMETERS_AUTO_CALIBRATION_MCP_m_f_r_mbc	200
RESULTS_SEARCH_5_PARAMETERS_AUTO_CALIBRATION_MCP_m_m_c	1900-01-10
RESULTS_SEARCH_5_PARAMETERS_AUTO_CALIBRATION_MCP_m_m_f_s	0.25
RESULTS_SEARCH_5_PARAMETERS_AUTO_CALIBRATION_MCP_m_m_p_f	0.33
RESULTS_SEARCH_5_PARAMETERS_AUTO_CALIBRATION_MCP_m_m_p_rms_f	1
RESULTS_SEARCH_5_PARAMETERS_AUTO_CALIBRATION_MCP_m_p_t_f	1
RESULTS_SEARCH_5_PARAMETERS_AUTO_CALIBRATION_MCP_m_r_h_n_b	15
RESULTS_SEARCH_5_PARAMETERS_AUTO_CALIBRATION_MCP_m_z_n_s	99
RESULTS_SEARCH_5_PARAMETERS_AUTO_CALIBRATION_MCP_m_z_s_mn_f_r	0.0666667
RESULTS_SEARCH_5_PARAMETERS_AUTO_CALIBRATION_MCP_m_z_s_mx_f_r	0.1
RESULTS_SEARCH_5_PARAMETERS_MAX_PRECURSORS_FRAGLET	5
RESULTS_SEARCH_5_PARAMETERS_MAX_PRECURSORS_TAGLET	1
RESULTS_SEARCH_5_PARAMETERS_PRECURSORS_DR_FRAGLET	10
RESULTS_SEARCH_5_PARAMETERS_PRECURSORS_DR_TAGLET	1900-01-03
RESULTS_SEARCH_5_PARAMETERS_DEFAULT_CHARGE_STATE_1_charge	2
RESULTS_SEARCH_5_PARAMETERS_DEFAULT_CHARGE_STATE_1_probability	1
RESULTS_SEARCH_5_PARAMETERS_DEFAULT_CHARGE_STATE_2_charge	3
RESULTS_SEARCH_5_PARAMETERS_DEFAULT_CHARGE_STATE_2_probability	1
RESULTS_SEARCH_5_PARAMETERS_DEFAULT_CHARGE_STATE_3_charge	4
RESULTS_SEARCH_5_PARAMETERS_DEFAULT_CHARGE_STATE_3_probability	1
RESULTS_SEARCH_5_PARAMETERS_VERSION	5.0.1.0, 4895
RESULTS_SEARCH_5_PARAMETERS_PARAGON_VERSION	5.0.1.0, 4874
RESULTS_SEARCH_5_PARAMETERS_APPLICATION	ProteinPilot(tm) Software
RESULTS_SEARCH_5_PARAMETERS_PROGROUP_alternativedispositionmaximumfoldprobabilitydrop	100
RESULTS_SEARCH_5_PARAMETERS_PROGROUP_alternativedispositionmaximumfoldscoredrop	2
RESULTS_SEARCH_5_PARAMETERS_PROGROUP_autodiscordantpeptidethreshold	07:12:00
RESULTS_SEARCH_5_PARAMETERS_PROGROUP_bayesconfidencecalclulation	TRUE
RESULTS_SEARCH_5_PARAMETERS_PROGROUP_calibrateconfidence	TRUE
RESULTS_SEARCH_5_PARAMETERS_PROGROUP_compresspeptides	FALSE
RESULTS_SEARCH_5_PARAMETERS_PROGROUP_confidencepercentthresholdforexcludingothersfromquant	15
RESULTS_SEARCH_5_PARAMETERS_PROGROUP_confidencepercentthresholdforincludingselfinquant	15
RESULTS_SEARCH_5_PARAMETERS_PROGROUP_donotstoremspeaklists	FALSE
RESULTS_SEARCH_5_PARAMETERS_PROGROUP_fasta	C:\AB SCIEX\ProteinPilot Data\SearchDatabases\uniprot-zebrafish_with_Clover.fasta
RESULTS_SEARCH_5_PARAMETERS_PROGROUP_featuregroupminpepconf	0.66
RESULTS_SEARCH_5_PARAMETERS_PROGROUP_featuregroupminups	0.47
RESULTS_SEARCH_5_PARAMETERS_PROGROUP_focusingintersection	4
RESULTS_SEARCH_5_PARAMETERS_PROGROUP_focusingminimummatchconfidence	0.1
RESULTS_SEARCH_5_PARAMETERS_PROGROUP_focusingminunusedprotscore	0.1
RESULTS_SEARCH_5_PARAMETERS_PROGROUP_focusingsubsetcutoff	6
RESULTS_SEARCH_5_PARAMETERS_PROGROUP_intersection	1.3
RESULTS_SEARCH_5_PARAMETERS_PROGROUP_minimummatchconfidencecutoff	0.001
RESULTS_SEARCH_5_PARAMETERS_PROGROUP_minunusedprotscore	0.0458
RESULTS_SEARCH_5_PARAMETERS_PROGROUP_subsetcutoff	2
RESULTS_SEARCH_5_PARAMETERS_PROGROUP_unusedprotscorethresholdforexcludingothersfromquant	1.3
RESULTS_SEARCH_5_PARAMETERS_PEAKLIST_count	2598
RESULTS_SEARCH_5_PARAMETERS_PEAKLIST_filenumber	3
RESULTS_SEARCH_5_PARAMETERS_PEAKLIST_original_count	2598
RESULTS_SEARCH_5_PARAMETERS_PEAKLIST_originalfilename	C:\AB SCIEX\ProteinPilot Data\Results\Albert\ZX 20200624 6600\ZX 20200624 C4B 3.wiff
RESULTS_SEARCH_5_PARAMETERS_PEAKLIST_partnumber	3
RESULTS_SEARCH_5_PARAMETERS_QUANT_TYPE_background_correction	FALSE
RESULTS_SEARCH_5_PARAMETERS_QUANT_TYPE_bias_correction	TRUE
RESULTS_SEARCH_5_PARAMETERS_QUANT_TYPE_keep_extreme_peptides_over_fraction	0
RESULTS_SEARCH_5_PARAMETERS_QUANT_TYPE_low_confidence_check	TRUE
RESULTS_SEARCH_5_PARAMETERS_QUANT_TYPE_low_intensity_check	TRUE
RESULTS_SEARCH_5_PARAMETERS_QUANT_TYPE_median_statistic	TRUE
RESULTS_SEARCH_5_PARAMETERS_QUANT_TYPE_mod_check	TRUE
RESULTS_SEARCH_5_PARAMETERS_QUANT_TYPE_quant_threshold	-1
RESULTS_SEARCH_5_PARAMETERS_QUANT_TYPE_quant_threshold_sn	9
RESULTS_SEARCH_5_PARAMETERS_QUANT_TYPE_separate_searches	FALSE
RESULTS_SEARCH_5_PARAMETERS_QUANT_TYPE_shared_msms_check	TRUE
RESULTS_SEARCH_5_PARAMETERS_PARAGON_METHOD_SETTINGS_UI_SAMPLE_TYPE	Identification
RESULTS_SEARCH_5_PARAMETERS_PARAGON_METHOD_SETTINGS_UI_CYS_ALKYLATION	Iodoacetamide w other Cys mods possible
RESULTS_SEARCH_5_PARAMETERS_PARAGON_METHOD_SETTINGS_UI_DIGESTION	Trypsin + Lys C
RESULTS_SEARCH_5_PARAMETERS_PARAGON_METHOD_SETTINGS_UI_SPECIAL_FACTOR	Gel-based ID
RESULTS_SEARCH_5_PARAMETERS_PARAGON_METHOD_SETTINGS_UI_INSTRUMENT	TripleTOF 6600
RESULTS_SEARCH_5_PARAMETERS_PARAGON_METHOD_SETTINGS_UI_SEARCH_EFFORT	Thorough
RESULTS_SEARCH_5_PARAMETERS_PARAGON_METHOD_SETTINGS_UI_USER_NAME	IMB-MASS02\massuser
RESULTS_SEARCH_5_PARAMETERS_PARAGON_METHOD_SETTINGS_UI_MACHINE_NAME	IMB-MASS02
RESULTS_SEARCH_5_PARAMETERS_PARAGON_METHOD_SETTINGS_UI_SEARCH_ID	6.37467e+17
RESULTS_SEARCH_5_PARAMETERS_PARAGON_METHOD_SETTINGS_UI_START_TIME	2021-01-19 16:10:26
RESULTS_SEARCH_5_PARAMETERS_PARAGON_METHOD_SETTINGS_UI_MIN_UNUSED_PROTSCORE	0.0458
RESULTS_SEARCH_5_PARAMETERS_PARAGON_METHOD_SETTINGS_UI_PSPEP	TRUE
RESULTS_SEARCH_6_time_cpu	218136
RESULTS_SEARCH_6_time_duration	218267
RESULTS_SEARCH_6_version	5.0.1.4874
RESULTS_SEARCH_6_xml:id	SEARCH:2:637466694135747474_2
RESULTS_SEARCH_6_PARAMETERS_chemical_data_edited	FALSE
RESULTS_SEARCH_6_PARAMETERS_do_multiprecursor_search	TRUE
RESULTS_SEARCH_6_PARAMETERS_do_reverse_search	TRUE
RESULTS_SEARCH_6_PARAMETERS_max_quant_labels	35
RESULTS_SEARCH_6_PARAMETERS_maxresults	15
RESULTS_SEARCH_6_PARAMETERS_separate_searches	FALSE
RESULTS_SEARCH_6_PARAMETERS_MSTOLERANCE_type	dalton
RESULTS_SEARCH_6_PARAMETERS_MSTOLERANCE_value	0.05
RESULTS_SEARCH_6_PARAMETERS_MSMSTOLERANCE_type	dalton
RESULTS_SEARCH_6_PARAMETERS_MSMSTOLERANCE_value	0.1
RESULTS_SEARCH_6_PARAMETERS_MS_STANDARD_DEVIATION_type	dalton
RESULTS_SEARCH_6_PARAMETERS_MS_STANDARD_DEVIATION_value	0.0011
RESULTS_SEARCH_6_PARAMETERS_MSMS_STANDARD_DEVIATION_type	dalton
RESULTS_SEARCH_6_PARAMETERS_MSMS_STANDARD_DEVIATION_value	0.01
RESULTS_SEARCH_6_PARAMETERS_FASTA_filename	C:\AB SCIEX\ProteinPilot Data\SearchDatabases\uniprot-zebrafish_with_Clover.fasta
RESULTS_SEARCH_6_PARAMETERS_AUTO_CALIBRATION_ms	TRUE
RESULTS_SEARCH_6_PARAMETERS_AUTO_CALIBRATION_msexport	FALSE
RESULTS_SEARCH_6_PARAMETERS_AUTO_CALIBRATION_msms	TRUE
RESULTS_SEARCH_6_PARAMETERS_AUTO_CALIBRATION_msmstolsdratio	2.75
RESULTS_SEARCH_6_PARAMETERS_AUTO_CALIBRATION_mstolsdratio	7
RESULTS_SEARCH_6_PARAMETERS_AUTO_CALIBRATION_squareroot	TRUE
RESULTS_SEARCH_6_PARAMETERS_AUTO_CALIBRATION_type	dalton
RESULTS_SEARCH_6_PARAMETERS_AUTO_CALIBRATION_MCP_d_s_s_f	0.0666667
RESULTS_SEARCH_6_PARAMETERS_AUTO_CALIBRATION_MCP_d_s_w_f	3
RESULTS_SEARCH_6_PARAMETERS_AUTO_CALIBRATION_MCP_m_f_r_mbc	200
RESULTS_SEARCH_6_PARAMETERS_AUTO_CALIBRATION_MCP_m_m_c	10
RESULTS_SEARCH_6_PARAMETERS_AUTO_CALIBRATION_MCP_m_m_f_s	0.25
RESULTS_SEARCH_6_PARAMETERS_AUTO_CALIBRATION_MCP_m_m_p_f	0.33
RESULTS_SEARCH_6_PARAMETERS_AUTO_CALIBRATION_MCP_m_m_p_rms_f	1
RESULTS_SEARCH_6_PARAMETERS_AUTO_CALIBRATION_MCP_m_p_t_f	1
RESULTS_SEARCH_6_PARAMETERS_AUTO_CALIBRATION_MCP_m_r_h_n_b	15
RESULTS_SEARCH_6_PARAMETERS_AUTO_CALIBRATION_MCP_m_z_n_s	99
RESULTS_SEARCH_6_PARAMETERS_AUTO_CALIBRATION_MCP_m_z_s_mn_f_r	0.0666667
RESULTS_SEARCH_6_PARAMETERS_AUTO_CALIBRATION_MCP_m_z_s_mx_f_r	0.1
RESULTS_SEARCH_6_PARAMETERS_MAX_PRECURSORS_FRAGLET	5
RESULTS_SEARCH_6_PARAMETERS_MAX_PRECURSORS_TAGLET	1
RESULTS_SEARCH_6_PARAMETERS_PRECURSORS_DR_FRAGLET	10
RESULTS_SEARCH_6_PARAMETERS_PRECURSORS_DR_TAGLET	3
RESULTS_SEARCH_6_PARAMETERS_DEFAULT_CHARGE_STATE_1_charge	2
RESULTS_SEARCH_6_PARAMETERS_DEFAULT_CHARGE_STATE_1_probability	1
RESULTS_SEARCH_6_PARAMETERS_DEFAULT_CHARGE_STATE_2_charge	3
RESULTS_SEARCH_6_PARAMETERS_DEFAULT_CHARGE_STATE_2_probability	1
RESULTS_SEARCH_6_PARAMETERS_DEFAULT_CHARGE_STATE_3_charge	4
RESULTS_SEARCH_6_PARAMETERS_DEFAULT_CHARGE_STATE_3_probability	1
RESULTS_SEARCH_6_PARAMETERS_VERSION	5.0.1.0, 4895
RESULTS_SEARCH_6_PARAMETERS_PARAGON_VERSION	5.0.1.0, 4874
RESULTS_SEARCH_6_PARAMETERS_APPLICATION	ProteinPilot(tm) Software
RESULTS_SEARCH_6_PARAMETERS_PROGROUP_alternativedispositionmaximumfoldprobabilitydrop	100
RESULTS_SEARCH_6_PARAMETERS_PROGROUP_alternativedispositionmaximumfoldscoredrop	2
RESULTS_SEARCH_6_PARAMETERS_PROGROUP_autodiscordantpeptidethreshold	0.3
RESULTS_SEARCH_6_PARAMETERS_PROGROUP_bayesconfidencecalclulation	TRUE
RESULTS_SEARCH_6_PARAMETERS_PROGROUP_calibrateconfidence	TRUE
RESULTS_SEARCH_6_PARAMETERS_PROGROUP_compresspeptides	FALSE
RESULTS_SEARCH_6_PARAMETERS_PROGROUP_confidencepercentthresholdforexcludingothersfromquant	15
RESULTS_SEARCH_6_PARAMETERS_PROGROUP_confidencepercentthresholdforincludingselfinquant	15
RESULTS_SEARCH_6_PARAMETERS_PROGROUP_donotstoremspeaklists	FALSE
RESULTS_SEARCH_6_PARAMETERS_PROGROUP_fasta	C:\AB SCIEX\ProteinPilot Data\SearchDatabases\uniprot-zebrafish_with_Clover.fasta
RESULTS_SEARCH_6_PARAMETERS_PROGROUP_featuregroupminpepconf	0.66
RESULTS_SEARCH_6_PARAMETERS_PROGROUP_featuregroupminups	0.47
RESULTS_SEARCH_6_PARAMETERS_PROGROUP_focusingintersection	4
RESULTS_SEARCH_6_PARAMETERS_PROGROUP_focusingminimummatchconfidence	0.1
RESULTS_SEARCH_6_PARAMETERS_PROGROUP_focusingminunusedprotscore	0.1
RESULTS_SEARCH_6_PARAMETERS_PROGROUP_focusingsubsetcutoff	6
RESULTS_SEARCH_6_PARAMETERS_PROGROUP_intersection	1.3
RESULTS_SEARCH_6_PARAMETERS_PROGROUP_minimummatchconfidencecutoff	0.001
RESULTS_SEARCH_6_PARAMETERS_PROGROUP_minunusedprotscore	0.0458
RESULTS_SEARCH_6_PARAMETERS_PROGROUP_subsetcutoff	2
RESULTS_SEARCH_6_PARAMETERS_PROGROUP_unusedprotscorethresholdforexcludingothersfromquant	1.3
RESULTS_SEARCH_6_PARAMETERS_PEAKLIST_count	2598
RESULTS_SEARCH_6_PARAMETERS_PEAKLIST_filenumber	3
RESULTS_SEARCH_6_PARAMETERS_PEAKLIST_original_count	2598
RESULTS_SEARCH_6_PARAMETERS_PEAKLIST_originalfilename	C:\AB SCIEX\ProteinPilot Data\Results\Albert\ZX 20200624 6600\ZX 20200624 C4B 3.wiff
RESULTS_SEARCH_6_PARAMETERS_PEAKLIST_partnumber	3
RESULTS_SEARCH_6_PARAMETERS_QUANT_TYPE_background_correction	FALSE
RESULTS_SEARCH_6_PARAMETERS_QUANT_TYPE_bias_correction	TRUE
RESULTS_SEARCH_6_PARAMETERS_QUANT_TYPE_keep_extreme_peptides_over_fraction	00:00:00
RESULTS_SEARCH_6_PARAMETERS_QUANT_TYPE_low_confidence_check	TRUE
RESULTS_SEARCH_6_PARAMETERS_QUANT_TYPE_low_intensity_check	TRUE
RESULTS_SEARCH_6_PARAMETERS_QUANT_TYPE_median_statistic	TRUE
RESULTS_SEARCH_6_PARAMETERS_QUANT_TYPE_mod_check	TRUE
RESULTS_SEARCH_6_PARAMETERS_QUANT_TYPE_quant_threshold	-1
RESULTS_SEARCH_6_PARAMETERS_QUANT_TYPE_quant_threshold_sn	9
RESULTS_SEARCH_6_PARAMETERS_QUANT_TYPE_separate_searches	FALSE
RESULTS_SEARCH_6_PARAMETERS_QUANT_TYPE_shared_msms_check	TRUE
RESULTS_SEARCH_6_PARAMETERS_PARAGON_METHOD_SETTINGS_UI_SAMPLE_TYPE	Identification
RESULTS_SEARCH_6_PARAMETERS_PARAGON_METHOD_SETTINGS_UI_CYS_ALKYLATION	Iodoacetamide w other Cys mods possible
RESULTS_SEARCH_6_PARAMETERS_PARAGON_METHOD_SETTINGS_UI_DIGESTION	Trypsin + Lys C
RESULTS_SEARCH_6_PARAMETERS_PARAGON_METHOD_SETTINGS_UI_SPECIAL_FACTOR	Gel-based ID
RESULTS_SEARCH_6_PARAMETERS_PARAGON_METHOD_SETTINGS_UI_INSTRUMENT	TripleTOF 6600
RESULTS_SEARCH_6_PARAMETERS_PARAGON_METHOD_SETTINGS_UI_SEARCH_EFFORT	Thorough
RESULTS_SEARCH_6_PARAMETERS_PARAGON_METHOD_SETTINGS_UI_USER_NAME	IMB-MASS02\massuser
RESULTS_SEARCH_6_PARAMETERS_PARAGON_METHOD_SETTINGS_UI_MACHINE_NAME	IMB-MASS02
RESULTS_SEARCH_6_PARAMETERS_PARAGON_METHOD_SETTINGS_UI_SEARCH_ID	6.37467e+17
RESULTS_SEARCH_6_PARAMETERS_PARAGON_METHOD_SETTINGS_UI_START_TIME	2021-01-19 16:10:26
RESULTS_SEARCH_6_PARAMETERS_PARAGON_METHOD_SETTINGS_UI_MIN_UNUSED_PROTSCORE	0.0458
RESULTS_SEARCH_6_PARAMETERS_PARAGON_METHOD_SETTINGS_UI_PSPEP	TRUE
RESULTS_SEARCH_7_time_cpu	219431
RESULTS_SEARCH_7_time_duration	251887
RESULTS_SEARCH_7_version	5.0.1.4874
RESULTS_SEARCH_7_xml:id	SEARCH:1:637466694135747474_3
RESULTS_SEARCH_7_PARAMETERS_chemical_data_edited	FALSE
RESULTS_SEARCH_7_PARAMETERS_do_multiprecursor_search	TRUE
RESULTS_SEARCH_7_PARAMETERS_do_reverse_search	TRUE
RESULTS_SEARCH_7_PARAMETERS_max_quant_labels	35
RESULTS_SEARCH_7_PARAMETERS_maxresults	15
RESULTS_SEARCH_7_PARAMETERS_separate_searches	FALSE
RESULTS_SEARCH_7_PARAMETERS_MSTOLERANCE_type	dalton
RESULTS_SEARCH_7_PARAMETERS_MSTOLERANCE_value	0.05
RESULTS_SEARCH_7_PARAMETERS_MSMSTOLERANCE_type	dalton
RESULTS_SEARCH_7_PARAMETERS_MSMSTOLERANCE_value	0.1
RESULTS_SEARCH_7_PARAMETERS_MS_STANDARD_DEVIATION_type	dalton
RESULTS_SEARCH_7_PARAMETERS_MS_STANDARD_DEVIATION_value	0.0011
RESULTS_SEARCH_7_PARAMETERS_MSMS_STANDARD_DEVIATION_type	dalton
RESULTS_SEARCH_7_PARAMETERS_MSMS_STANDARD_DEVIATION_value	0.01
RESULTS_SEARCH_7_PARAMETERS_FASTA_filename	C:\AB SCIEX\ProteinPilot Data\SearchDatabases\uniprot-zebrafish_with_Clover.fasta
RESULTS_SEARCH_7_PARAMETERS_AUTO_CALIBRATION_ms	TRUE
RESULTS_SEARCH_7_PARAMETERS_AUTO_CALIBRATION_msexport	FALSE
RESULTS_SEARCH_7_PARAMETERS_AUTO_CALIBRATION_msms	TRUE
RESULTS_SEARCH_7_PARAMETERS_AUTO_CALIBRATION_msmstolsdratio	2.75
RESULTS_SEARCH_7_PARAMETERS_AUTO_CALIBRATION_mstolsdratio	7
RESULTS_SEARCH_7_PARAMETERS_AUTO_CALIBRATION_squareroot	TRUE
RESULTS_SEARCH_7_PARAMETERS_AUTO_CALIBRATION_type	dalton
RESULTS_SEARCH_7_PARAMETERS_AUTO_CALIBRATION_MCP_d_s_s_f	0.0666667
RESULTS_SEARCH_7_PARAMETERS_AUTO_CALIBRATION_MCP_d_s_w_f	3
RESULTS_SEARCH_7_PARAMETERS_AUTO_CALIBRATION_MCP_m_f_r_mbc	200
RESULTS_SEARCH_7_PARAMETERS_AUTO_CALIBRATION_MCP_m_m_c	10
RESULTS_SEARCH_7_PARAMETERS_AUTO_CALIBRATION_MCP_m_m_f_s	0.25
RESULTS_SEARCH_7_PARAMETERS_AUTO_CALIBRATION_MCP_m_m_p_f	0.33
RESULTS_SEARCH_7_PARAMETERS_AUTO_CALIBRATION_MCP_m_m_p_rms_f	1
RESULTS_SEARCH_7_PARAMETERS_AUTO_CALIBRATION_MCP_m_p_t_f	1
RESULTS_SEARCH_7_PARAMETERS_AUTO_CALIBRATION_MCP_m_r_h_n_b	15
RESULTS_SEARCH_7_PARAMETERS_AUTO_CALIBRATION_MCP_m_z_n_s	99
RESULTS_SEARCH_7_PARAMETERS_AUTO_CALIBRATION_MCP_m_z_s_mn_f_r	0.0666667
RESULTS_SEARCH_7_PARAMETERS_AUTO_CALIBRATION_MCP_m_z_s_mx_f_r	0.1
RESULTS_SEARCH_7_PARAMETERS_MAX_PRECURSORS_FRAGLET	5
RESULTS_SEARCH_7_PARAMETERS_MAX_PRECURSORS_TAGLET	1
RESULTS_SEARCH_7_PARAMETERS_PRECURSORS_DR_FRAGLET	10
RESULTS_SEARCH_7_PARAMETERS_PRECURSORS_DR_TAGLET	3
RESULTS_SEARCH_7_PARAMETERS_DEFAULT_CHARGE_STATE_1_charge	2
RESULTS_SEARCH_7_PARAMETERS_DEFAULT_CHARGE_STATE_1_probability	1
RESULTS_SEARCH_7_PARAMETERS_DEFAULT_CHARGE_STATE_2_charge	3
RESULTS_SEARCH_7_PARAMETERS_DEFAULT_CHARGE_STATE_2_probability	1
RESULTS_SEARCH_7_PARAMETERS_DEFAULT_CHARGE_STATE_3_charge	4
RESULTS_SEARCH_7_PARAMETERS_DEFAULT_CHARGE_STATE_3_probability	1
RESULTS_SEARCH_7_PARAMETERS_VERSION	5.0.1.0, 4895
RESULTS_SEARCH_7_PARAMETERS_PARAGON_VERSION	5.0.1.0, 4874
RESULTS_SEARCH_7_PARAMETERS_APPLICATION	ProteinPilot(tm) Software
RESULTS_SEARCH_7_PARAMETERS_PROGROUP_alternativedispositionmaximumfoldprobabilitydrop	100
RESULTS_SEARCH_7_PARAMETERS_PROGROUP_alternativedispositionmaximumfoldscoredrop	2
RESULTS_SEARCH_7_PARAMETERS_PROGROUP_autodiscordantpeptidethreshold	0.3
RESULTS_SEARCH_7_PARAMETERS_PROGROUP_bayesconfidencecalclulation	TRUE
RESULTS_SEARCH_7_PARAMETERS_PROGROUP_calibrateconfidence	TRUE
RESULTS_SEARCH_7_PARAMETERS_PROGROUP_compresspeptides	FALSE
RESULTS_SEARCH_7_PARAMETERS_PROGROUP_confidencepercentthresholdforexcludingothersfromquant	15
RESULTS_SEARCH_7_PARAMETERS_PROGROUP_confidencepercentthresholdforincludingselfinquant	15
RESULTS_SEARCH_7_PARAMETERS_PROGROUP_donotstoremspeaklists	FALSE
RESULTS_SEARCH_7_PARAMETERS_PROGROUP_fasta	C:\AB SCIEX\ProteinPilot Data\SearchDatabases\uniprot-zebrafish_with_Clover.fasta
RESULTS_SEARCH_7_PARAMETERS_PROGROUP_featuregroupminpepconf	0.66
RESULTS_SEARCH_7_PARAMETERS_PROGROUP_featuregroupminups	0.47
RESULTS_SEARCH_7_PARAMETERS_PROGROUP_focusingintersection	1900-01-04
RESULTS_SEARCH_7_PARAMETERS_PROGROUP_focusingminimummatchconfidence	02:24:00
RESULTS_SEARCH_7_PARAMETERS_PROGROUP_focusingminunusedprotscore	02:24:00
RESULTS_SEARCH_7_PARAMETERS_PROGROUP_focusingsubsetcutoff	6
RESULTS_SEARCH_7_PARAMETERS_PROGROUP_intersection	1.3
RESULTS_SEARCH_7_PARAMETERS_PROGROUP_minimummatchconfidencecutoff	0.001
RESULTS_SEARCH_7_PARAMETERS_PROGROUP_minunusedprotscore	0.0458
RESULTS_SEARCH_7_PARAMETERS_PROGROUP_subsetcutoff	2
RESULTS_SEARCH_7_PARAMETERS_PROGROUP_unusedprotscorethresholdforexcludingothersfromquant	1.3
RESULTS_SEARCH_7_PARAMETERS_PEAKLIST_count	2007
RESULTS_SEARCH_7_PARAMETERS_PEAKLIST_filenumber	4
RESULTS_SEARCH_7_PARAMETERS_PEAKLIST_original_count	2007
RESULTS_SEARCH_7_PARAMETERS_PEAKLIST_originalfilename	C:\AB SCIEX\ProteinPilot Data\Results\Albert\ZX 20200624 6600\ZX 20200624 C4B 4.wiff
RESULTS_SEARCH_7_PARAMETERS_PEAKLIST_partnumber	4
RESULTS_SEARCH_7_PARAMETERS_QUANT_TYPE_background_correction	FALSE
RESULTS_SEARCH_7_PARAMETERS_QUANT_TYPE_bias_correction	TRUE
RESULTS_SEARCH_7_PARAMETERS_QUANT_TYPE_keep_extreme_peptides_over_fraction	0
RESULTS_SEARCH_7_PARAMETERS_QUANT_TYPE_low_confidence_check	TRUE
RESULTS_SEARCH_7_PARAMETERS_QUANT_TYPE_low_intensity_check	TRUE
RESULTS_SEARCH_7_PARAMETERS_QUANT_TYPE_median_statistic	TRUE
RESULTS_SEARCH_7_PARAMETERS_QUANT_TYPE_mod_check	TRUE
RESULTS_SEARCH_7_PARAMETERS_QUANT_TYPE_quant_threshold	-1
RESULTS_SEARCH_7_PARAMETERS_QUANT_TYPE_quant_threshold_sn	9
RESULTS_SEARCH_7_PARAMETERS_QUANT_TYPE_separate_searches	FALSE
RESULTS_SEARCH_7_PARAMETERS_QUANT_TYPE_shared_msms_check	TRUE
RESULTS_SEARCH_7_PARAMETERS_PARAGON_METHOD_SETTINGS_UI_SAMPLE_TYPE	Identification
RESULTS_SEARCH_7_PARAMETERS_PARAGON_METHOD_SETTINGS_UI_CYS_ALKYLATION	Iodoacetamide w other Cys mods possible
RESULTS_SEARCH_7_PARAMETERS_PARAGON_METHOD_SETTINGS_UI_DIGESTION	Trypsin + Lys C
RESULTS_SEARCH_7_PARAMETERS_PARAGON_METHOD_SETTINGS_UI_SPECIAL_FACTOR	Gel-based ID
RESULTS_SEARCH_7_PARAMETERS_PARAGON_METHOD_SETTINGS_UI_INSTRUMENT	TripleTOF 6600
RESULTS_SEARCH_7_PARAMETERS_PARAGON_METHOD_SETTINGS_UI_SEARCH_EFFORT	Thorough
RESULTS_SEARCH_7_PARAMETERS_PARAGON_METHOD_SETTINGS_UI_USER_NAME	IMB-MASS02\massuser
RESULTS_SEARCH_7_PARAMETERS_PARAGON_METHOD_SETTINGS_UI_MACHINE_NAME	IMB-MASS02
RESULTS_SEARCH_7_PARAMETERS_PARAGON_METHOD_SETTINGS_UI_SEARCH_ID	6.37467e+17
RESULTS_SEARCH_7_PARAMETERS_PARAGON_METHOD_SETTINGS_UI_START_TIME	2021-01-19 16:10:26
RESULTS_SEARCH_7_PARAMETERS_PARAGON_METHOD_SETTINGS_UI_MIN_UNUSED_PROTSCORE	0.0458
RESULTS_SEARCH_7_PARAMETERS_PARAGON_METHOD_SETTINGS_UI_PSPEP	TRUE
RESULTS_SEARCH_8_time_cpu	155267
RESULTS_SEARCH_8_time_duration	155413
RESULTS_SEARCH_8_version	5.0.1.4874
RESULTS_SEARCH_8_xml:id	SEARCH:2:637466694135747474_3
RESULTS_SEARCH_8_PARAMETERS_chemical_data_edited	FALSE
RESULTS_SEARCH_8_PARAMETERS_do_multiprecursor_search	TRUE
RESULTS_SEARCH_8_PARAMETERS_do_reverse_search	TRUE
RESULTS_SEARCH_8_PARAMETERS_max_quant_labels	35
RESULTS_SEARCH_8_PARAMETERS_maxresults	15
RESULTS_SEARCH_8_PARAMETERS_separate_searches	FALSE
RESULTS_SEARCH_8_PARAMETERS_MSTOLERANCE_type	dalton
RESULTS_SEARCH_8_PARAMETERS_MSTOLERANCE_value	0.05
RESULTS_SEARCH_8_PARAMETERS_MSMSTOLERANCE_type	dalton
RESULTS_SEARCH_8_PARAMETERS_MSMSTOLERANCE_value	0.1
RESULTS_SEARCH_8_PARAMETERS_MS_STANDARD_DEVIATION_type	dalton
RESULTS_SEARCH_8_PARAMETERS_MS_STANDARD_DEVIATION_value	0.0011
RESULTS_SEARCH_8_PARAMETERS_MSMS_STANDARD_DEVIATION_type	dalton
RESULTS_SEARCH_8_PARAMETERS_MSMS_STANDARD_DEVIATION_value	0.01
RESULTS_SEARCH_8_PARAMETERS_FASTA_filename	C:\AB SCIEX\ProteinPilot Data\SearchDatabases\uniprot-zebrafish_with_Clover.fasta
RESULTS_SEARCH_8_PARAMETERS_AUTO_CALIBRATION_ms	TRUE
RESULTS_SEARCH_8_PARAMETERS_AUTO_CALIBRATION_msexport	FALSE
RESULTS_SEARCH_8_PARAMETERS_AUTO_CALIBRATION_msms	TRUE
RESULTS_SEARCH_8_PARAMETERS_AUTO_CALIBRATION_msmstolsdratio	2.75
RESULTS_SEARCH_8_PARAMETERS_AUTO_CALIBRATION_mstolsdratio	7
RESULTS_SEARCH_8_PARAMETERS_AUTO_CALIBRATION_squareroot	TRUE
RESULTS_SEARCH_8_PARAMETERS_AUTO_CALIBRATION_type	dalton
RESULTS_SEARCH_8_PARAMETERS_AUTO_CALIBRATION_MCP_d_s_s_f	0.0666667
RESULTS_SEARCH_8_PARAMETERS_AUTO_CALIBRATION_MCP_d_s_w_f	3
RESULTS_SEARCH_8_PARAMETERS_AUTO_CALIBRATION_MCP_m_f_r_mbc	200
RESULTS_SEARCH_8_PARAMETERS_AUTO_CALIBRATION_MCP_m_m_c	10
RESULTS_SEARCH_8_PARAMETERS_AUTO_CALIBRATION_MCP_m_m_f_s	0.25
RESULTS_SEARCH_8_PARAMETERS_AUTO_CALIBRATION_MCP_m_m_p_f	0.33
RESULTS_SEARCH_8_PARAMETERS_AUTO_CALIBRATION_MCP_m_m_p_rms_f	1
RESULTS_SEARCH_8_PARAMETERS_AUTO_CALIBRATION_MCP_m_p_t_f	1
RESULTS_SEARCH_8_PARAMETERS_AUTO_CALIBRATION_MCP_m_r_h_n_b	15
RESULTS_SEARCH_8_PARAMETERS_AUTO_CALIBRATION_MCP_m_z_n_s	99
RESULTS_SEARCH_8_PARAMETERS_AUTO_CALIBRATION_MCP_m_z_s_mn_f_r	0.0666667
RESULTS_SEARCH_8_PARAMETERS_AUTO_CALIBRATION_MCP_m_z_s_mx_f_r	0.1
RESULTS_SEARCH_8_PARAMETERS_MAX_PRECURSORS_FRAGLET	5
RESULTS_SEARCH_8_PARAMETERS_MAX_PRECURSORS_TAGLET	1
RESULTS_SEARCH_8_PARAMETERS_PRECURSORS_DR_FRAGLET	10
RESULTS_SEARCH_8_PARAMETERS_PRECURSORS_DR_TAGLET	3
RESULTS_SEARCH_8_PARAMETERS_DEFAULT_CHARGE_STATE_1_charge	2
RESULTS_SEARCH_8_PARAMETERS_DEFAULT_CHARGE_STATE_1_probability	1
RESULTS_SEARCH_8_PARAMETERS_DEFAULT_CHARGE_STATE_2_charge	3
RESULTS_SEARCH_8_PARAMETERS_DEFAULT_CHARGE_STATE_2_probability	1
RESULTS_SEARCH_8_PARAMETERS_DEFAULT_CHARGE_STATE_3_charge	4
RESULTS_SEARCH_8_PARAMETERS_DEFAULT_CHARGE_STATE_3_probability	1
RESULTS_SEARCH_8_PARAMETERS_VERSION	5.0.1.0, 4895
RESULTS_SEARCH_8_PARAMETERS_PARAGON_VERSION	5.0.1.0, 4874
RESULTS_SEARCH_8_PARAMETERS_APPLICATION	ProteinPilot(tm) Software
RESULTS_SEARCH_8_PARAMETERS_PROGROUP_alternativedispositionmaximumfoldprobabilitydrop	100
RESULTS_SEARCH_8_PARAMETERS_PROGROUP_alternativedispositionmaximumfoldscoredrop	2
RESULTS_SEARCH_8_PARAMETERS_PROGROUP_autodiscordantpeptidethreshold	0.3
RESULTS_SEARCH_8_PARAMETERS_PROGROUP_bayesconfidencecalclulation	TRUE
RESULTS_SEARCH_8_PARAMETERS_PROGROUP_calibrateconfidence	TRUE
RESULTS_SEARCH_8_PARAMETERS_PROGROUP_compresspeptides	FALSE
RESULTS_SEARCH_8_PARAMETERS_PROGROUP_confidencepercentthresholdforexcludingothersfromquant	15
RESULTS_SEARCH_8_PARAMETERS_PROGROUP_confidencepercentthresholdforincludingselfinquant	15
RESULTS_SEARCH_8_PARAMETERS_PROGROUP_donotstoremspeaklists	FALSE
RESULTS_SEARCH_8_PARAMETERS_PROGROUP_fasta	C:\AB SCIEX\ProteinPilot Data\SearchDatabases\uniprot-zebrafish_with_Clover.fasta
RESULTS_SEARCH_8_PARAMETERS_PROGROUP_featuregroupminpepconf	0.66
RESULTS_SEARCH_8_PARAMETERS_PROGROUP_featuregroupminups	0.47
RESULTS_SEARCH_8_PARAMETERS_PROGROUP_focusingintersection	4
RESULTS_SEARCH_8_PARAMETERS_PROGROUP_focusingminimummatchconfidence	0.1
RESULTS_SEARCH_8_PARAMETERS_PROGROUP_focusingminunusedprotscore	0.1
RESULTS_SEARCH_8_PARAMETERS_PROGROUP_focusingsubsetcutoff	6
RESULTS_SEARCH_8_PARAMETERS_PROGROUP_intersection	1.3
RESULTS_SEARCH_8_PARAMETERS_PROGROUP_minimummatchconfidencecutoff	0.001
RESULTS_SEARCH_8_PARAMETERS_PROGROUP_minunusedprotscore	0.0458
RESULTS_SEARCH_8_PARAMETERS_PROGROUP_subsetcutoff	2
RESULTS_SEARCH_8_PARAMETERS_PROGROUP_unusedprotscorethresholdforexcludingothersfromquant	1.3
RESULTS_SEARCH_8_PARAMETERS_PEAKLIST_count	2007
RESULTS_SEARCH_8_PARAMETERS_PEAKLIST_filenumber	4
RESULTS_SEARCH_8_PARAMETERS_PEAKLIST_original_count	2007
RESULTS_SEARCH_8_PARAMETERS_PEAKLIST_originalfilename	C:\AB SCIEX\ProteinPilot Data\Results\Albert\ZX 20200624 6600\ZX 20200624 C4B 4.wiff
RESULTS_SEARCH_8_PARAMETERS_PEAKLIST_partnumber	4
RESULTS_SEARCH_8_PARAMETERS_QUANT_TYPE_background_correction	FALSE
RESULTS_SEARCH_8_PARAMETERS_QUANT_TYPE_bias_correction	TRUE
RESULTS_SEARCH_8_PARAMETERS_QUANT_TYPE_keep_extreme_peptides_over_fraction	0
RESULTS_SEARCH_8_PARAMETERS_QUANT_TYPE_low_confidence_check	TRUE
RESULTS_SEARCH_8_PARAMETERS_QUANT_TYPE_low_intensity_check	TRUE
RESULTS_SEARCH_8_PARAMETERS_QUANT_TYPE_median_statistic	TRUE
RESULTS_SEARCH_8_PARAMETERS_QUANT_TYPE_mod_check	TRUE
RESULTS_SEARCH_8_PARAMETERS_QUANT_TYPE_quant_threshold	-1
RESULTS_SEARCH_8_PARAMETERS_QUANT_TYPE_quant_threshold_sn	1900-01-09
RESULTS_SEARCH_8_PARAMETERS_QUANT_TYPE_separate_searches	FALSE
RESULTS_SEARCH_8_PARAMETERS_QUANT_TYPE_shared_msms_check	TRUE
RESULTS_SEARCH_8_PARAMETERS_PARAGON_METHOD_SETTINGS_UI_SAMPLE_TYPE	Identification
RESULTS_SEARCH_8_PARAMETERS_PARAGON_METHOD_SETTINGS_UI_CYS_ALKYLATION	Iodoacetamide w other Cys mods possible
RESULTS_SEARCH_8_PARAMETERS_PARAGON_METHOD_SETTINGS_UI_DIGESTION	Trypsin + Lys C
RESULTS_SEARCH_8_PARAMETERS_PARAGON_METHOD_SETTINGS_UI_SPECIAL_FACTOR	Gel-based ID
RESULTS_SEARCH_8_PARAMETERS_PARAGON_METHOD_SETTINGS_UI_INSTRUMENT	TripleTOF 6600
RESULTS_SEARCH_8_PARAMETERS_PARAGON_METHOD_SETTINGS_UI_SEARCH_EFFORT	Thorough
RESULTS_SEARCH_8_PARAMETERS_PARAGON_METHOD_SETTINGS_UI_USER_NAME	IMB-MASS02\massuser
RESULTS_SEARCH_8_PARAMETERS_PARAGON_METHOD_SETTINGS_UI_MACHINE_NAME	IMB-MASS02
RESULTS_SEARCH_8_PARAMETERS_PARAGON_METHOD_SETTINGS_UI_SEARCH_ID	6.37467e+17
RESULTS_SEARCH_8_PARAMETERS_PARAGON_METHOD_SETTINGS_UI_START_TIME	2021-01-19 16:10:26
RESULTS_SEARCH_8_PARAMETERS_PARAGON_METHOD_SETTINGS_UI_MIN_UNUSED_PROTSCORE	0.0458
RESULTS_SEARCH_8_PARAMETERS_PARAGON_METHOD_SETTINGS_UI_PSPEP	TRUE
RESULTS_SEARCH_9_time_cpu	94630
RESULTS_SEARCH_9_time_duration	102683
RESULTS_SEARCH_9_version	5.0.1.4874
RESULTS_SEARCH_9_xml:id	SEARCH:1:637466694135747474_4
RESULTS_SEARCH_9_PARAMETERS_chemical_data_edited	FALSE
RESULTS_SEARCH_9_PARAMETERS_do_multiprecursor_search	TRUE
RESULTS_SEARCH_9_PARAMETERS_do_reverse_search	TRUE
RESULTS_SEARCH_9_PARAMETERS_max_quant_labels	35
RESULTS_SEARCH_9_PARAMETERS_maxresults	15
RESULTS_SEARCH_9_PARAMETERS_separate_searches	FALSE
RESULTS_SEARCH_9_PARAMETERS_MSTOLERANCE_type	dalton
RESULTS_SEARCH_9_PARAMETERS_MSTOLERANCE_value	0.05
RESULTS_SEARCH_9_PARAMETERS_MSMSTOLERANCE_type	dalton
RESULTS_SEARCH_9_PARAMETERS_MSMSTOLERANCE_value	0.1
RESULTS_SEARCH_9_PARAMETERS_MS_STANDARD_DEVIATION_type	dalton
RESULTS_SEARCH_9_PARAMETERS_MS_STANDARD_DEVIATION_value	0.0011
RESULTS_SEARCH_9_PARAMETERS_MSMS_STANDARD_DEVIATION_type	dalton
RESULTS_SEARCH_9_PARAMETERS_MSMS_STANDARD_DEVIATION_value	0.01
RESULTS_SEARCH_9_PARAMETERS_FASTA_filename	C:\AB SCIEX\ProteinPilot Data\SearchDatabases\uniprot-zebrafish_with_Clover.fasta
RESULTS_SEARCH_9_PARAMETERS_AUTO_CALIBRATION_ms	TRUE
RESULTS_SEARCH_9_PARAMETERS_AUTO_CALIBRATION_msexport	FALSE
RESULTS_SEARCH_9_PARAMETERS_AUTO_CALIBRATION_msms	TRUE
RESULTS_SEARCH_9_PARAMETERS_AUTO_CALIBRATION_msmstolsdratio	2.75
RESULTS_SEARCH_9_PARAMETERS_AUTO_CALIBRATION_mstolsdratio	7
RESULTS_SEARCH_9_PARAMETERS_AUTO_CALIBRATION_squareroot	TRUE
RESULTS_SEARCH_9_PARAMETERS_AUTO_CALIBRATION_type	dalton
RESULTS_SEARCH_9_PARAMETERS_AUTO_CALIBRATION_MCP_d_s_s_f	0.0666667
RESULTS_SEARCH_9_PARAMETERS_AUTO_CALIBRATION_MCP_d_s_w_f	3
RESULTS_SEARCH_9_PARAMETERS_AUTO_CALIBRATION_MCP_m_f_r_mbc	200
RESULTS_SEARCH_9_PARAMETERS_AUTO_CALIBRATION_MCP_m_m_c	10
RESULTS_SEARCH_9_PARAMETERS_AUTO_CALIBRATION_MCP_m_m_f_s	0.25
RESULTS_SEARCH_9_PARAMETERS_AUTO_CALIBRATION_MCP_m_m_p_f	0.33
RESULTS_SEARCH_9_PARAMETERS_AUTO_CALIBRATION_MCP_m_m_p_rms_f	1
RESULTS_SEARCH_9_PARAMETERS_AUTO_CALIBRATION_MCP_m_p_t_f	1
RESULTS_SEARCH_9_PARAMETERS_AUTO_CALIBRATION_MCP_m_r_h_n_b	15
RESULTS_SEARCH_9_PARAMETERS_AUTO_CALIBRATION_MCP_m_z_n_s	99
RESULTS_SEARCH_9_PARAMETERS_AUTO_CALIBRATION_MCP_m_z_s_mn_f_r	0.0666667
RESULTS_SEARCH_9_PARAMETERS_AUTO_CALIBRATION_MCP_m_z_s_mx_f_r	0.1
RESULTS_SEARCH_9_PARAMETERS_MS_AUTO_CALIBRATION_OUT_avres	-4.56566e-09
RESULTS_SEARCH_9_PARAMETERS_MS_AUTO_CALIBRATION_OUT_c0	9.11996e-05
RESULTS_SEARCH_9_PARAMETERS_MS_AUTO_CALIBRATION_OUT_c1minus1	-7.81834e-06
RESULTS_SEARCH_9_PARAMETERS_MS_AUTO_CALIBRATION_OUT_c2	0
RESULTS_SEARCH_9_PARAMETERS_MS_AUTO_CALIBRATION_OUT_file	5
RESULTS_SEARCH_9_PARAMETERS_MS_AUTO_CALIBRATION_OUT_partnumber	5
RESULTS_SEARCH_9_PARAMETERS_MS_AUTO_CALIBRATION_OUT_polyorder	1
RESULTS_SEARCH_9_PARAMETERS_MS_AUTO_CALIBRATION_OUT_sample	1
RESULTS_SEARCH_9_PARAMETERS_MS_AUTO_CALIBRATION_OUT_squareroot	TRUE
RESULTS_SEARCH_9_PARAMETERS_MSMS_AUTO_CALIBRATION_OUT_avres	-1.05348e-07
RESULTS_SEARCH_9_PARAMETERS_MSMS_AUTO_CALIBRATION_OUT_c0	-3.09003e-05
RESULTS_SEARCH_9_PARAMETERS_MSMS_AUTO_CALIBRATION_OUT_c1minus1	-2.44988e-06
RESULTS_SEARCH_9_PARAMETERS_MSMS_AUTO_CALIBRATION_OUT_c2	0
RESULTS_SEARCH_9_PARAMETERS_MSMS_AUTO_CALIBRATION_OUT_file	5
RESULTS_SEARCH_9_PARAMETERS_MSMS_AUTO_CALIBRATION_OUT_partnumber	1900-01-05
RESULTS_SEARCH_9_PARAMETERS_MSMS_AUTO_CALIBRATION_OUT_polyorder	1900-01-01
RESULTS_SEARCH_9_PARAMETERS_MSMS_AUTO_CALIBRATION_OUT_sample	1
RESULTS_SEARCH_9_PARAMETERS_MSMS_AUTO_CALIBRATION_OUT_squareroot	TRUE
RESULTS_SEARCH_9_PARAMETERS_MAX_PRECURSORS_FRAGLET	5
RESULTS_SEARCH_9_PARAMETERS_MAX_PRECURSORS_TAGLET	1900-01-01
RESULTS_SEARCH_9_PARAMETERS_PRECURSORS_DR_FRAGLET	10
RESULTS_SEARCH_9_PARAMETERS_PRECURSORS_DR_TAGLET	3
RESULTS_SEARCH_9_PARAMETERS_DEFAULT_CHARGE_STATE_1_charge	2
RESULTS_SEARCH_9_PARAMETERS_DEFAULT_CHARGE_STATE_1_probability	1
RESULTS_SEARCH_9_PARAMETERS_DEFAULT_CHARGE_STATE_2_charge	3
RESULTS_SEARCH_9_PARAMETERS_DEFAULT_CHARGE_STATE_2_probability	1
RESULTS_SEARCH_9_PARAMETERS_DEFAULT_CHARGE_STATE_3_charge	4
RESULTS_SEARCH_9_PARAMETERS_DEFAULT_CHARGE_STATE_3_probability	1
RESULTS_SEARCH_9_PARAMETERS_VERSION	5.0.1.0, 4895
RESULTS_SEARCH_9_PARAMETERS_PARAGON_VERSION	5.0.1.0, 4874
RESULTS_SEARCH_9_PARAMETERS_APPLICATION	ProteinPilot(tm) Software
RESULTS_SEARCH_9_PARAMETERS_PROGROUP_alternativedispositionmaximumfoldprobabilitydrop	100
RESULTS_SEARCH_9_PARAMETERS_PROGROUP_alternativedispositionmaximumfoldscoredrop	2
RESULTS_SEARCH_9_PARAMETERS_PROGROUP_autodiscordantpeptidethreshold	0.3
RESULTS_SEARCH_9_PARAMETERS_PROGROUP_bayesconfidencecalclulation	TRUE
RESULTS_SEARCH_9_PARAMETERS_PROGROUP_calibrateconfidence	TRUE
RESULTS_SEARCH_9_PARAMETERS_PROGROUP_compresspeptides	FALSE
RESULTS_SEARCH_9_PARAMETERS_PROGROUP_confidencepercentthresholdforexcludingothersfromquant	15
RESULTS_SEARCH_9_PARAMETERS_PROGROUP_confidencepercentthresholdforincludingselfinquant	15
RESULTS_SEARCH_9_PARAMETERS_PROGROUP_donotstoremspeaklists	FALSE
RESULTS_SEARCH_9_PARAMETERS_PROGROUP_fasta	C:\AB SCIEX\ProteinPilot Data\SearchDatabases\uniprot-zebrafish_with_Clover.fasta
RESULTS_SEARCH_9_PARAMETERS_PROGROUP_featuregroupminpepconf	0.66
RESULTS_SEARCH_9_PARAMETERS_PROGROUP_featuregroupminups	0.47
RESULTS_SEARCH_9_PARAMETERS_PROGROUP_focusingintersection	4
RESULTS_SEARCH_9_PARAMETERS_PROGROUP_focusingminimummatchconfidence	0.1
RESULTS_SEARCH_9_PARAMETERS_PROGROUP_focusingminunusedprotscore	0.1
RESULTS_SEARCH_9_PARAMETERS_PROGROUP_focusingsubsetcutoff	6
RESULTS_SEARCH_9_PARAMETERS_PROGROUP_intersection	1.3
RESULTS_SEARCH_9_PARAMETERS_PROGROUP_minimummatchconfidencecutoff	0.001
RESULTS_SEARCH_9_PARAMETERS_PROGROUP_minunusedprotscore	0.0458
RESULTS_SEARCH_9_PARAMETERS_PROGROUP_subsetcutoff	2
RESULTS_SEARCH_9_PARAMETERS_PROGROUP_unusedprotscorethresholdforexcludingothersfromquant	1.3
RESULTS_SEARCH_9_PARAMETERS_PEAKLIST_count	2251
RESULTS_SEARCH_9_PARAMETERS_PEAKLIST_filenumber	5
RESULTS_SEARCH_9_PARAMETERS_PEAKLIST_original_count	2251
RESULTS_SEARCH_9_PARAMETERS_PEAKLIST_originalfilename	C:\AB SCIEX\ProteinPilot Data\Results\Albert\ZX 20200624 6600\ZX 20200624 C4B 5.wiff
RESULTS_SEARCH_9_PARAMETERS_PEAKLIST_partnumber	5
RESULTS_SEARCH_9_PARAMETERS_QUANT_TYPE_background_correction	FALSE
RESULTS_SEARCH_9_PARAMETERS_QUANT_TYPE_bias_correction	TRUE
RESULTS_SEARCH_9_PARAMETERS_QUANT_TYPE_keep_extreme_peptides_over_fraction	00:00:00
RESULTS_SEARCH_9_PARAMETERS_QUANT_TYPE_low_confidence_check	TRUE
RESULTS_SEARCH_9_PARAMETERS_QUANT_TYPE_low_intensity_check	TRUE
RESULTS_SEARCH_9_PARAMETERS_QUANT_TYPE_median_statistic	TRUE
RESULTS_SEARCH_9_PARAMETERS_QUANT_TYPE_mod_check	TRUE
RESULTS_SEARCH_9_PARAMETERS_QUANT_TYPE_quant_threshold	-1
RESULTS_SEARCH_9_PARAMETERS_QUANT_TYPE_quant_threshold_sn	9
RESULTS_SEARCH_9_PARAMETERS_QUANT_TYPE_separate_searches	FALSE
RESULTS_SEARCH_9_PARAMETERS_QUANT_TYPE_shared_msms_check	TRUE
RESULTS_SEARCH_9_PARAMETERS_PARAGON_METHOD_SETTINGS_UI_SAMPLE_TYPE	Identification
RESULTS_SEARCH_9_PARAMETERS_PARAGON_METHOD_SETTINGS_UI_CYS_ALKYLATION	Iodoacetamide w other Cys mods possible
RESULTS_SEARCH_9_PARAMETERS_PARAGON_METHOD_SETTINGS_UI_DIGESTION	Trypsin + Lys C
RESULTS_SEARCH_9_PARAMETERS_PARAGON_METHOD_SETTINGS_UI_SPECIAL_FACTOR	Gel-based ID
RESULTS_SEARCH_9_PARAMETERS_PARAGON_METHOD_SETTINGS_UI_INSTRUMENT	TripleTOF 6600
RESULTS_SEARCH_9_PARAMETERS_PARAGON_METHOD_SETTINGS_UI_SEARCH_EFFORT	Thorough
RESULTS_SEARCH_9_PARAMETERS_PARAGON_METHOD_SETTINGS_UI_USER_NAME	IMB-MASS02\massuser
RESULTS_SEARCH_9_PARAMETERS_PARAGON_METHOD_SETTINGS_UI_MACHINE_NAME	IMB-MASS02
RESULTS_SEARCH_9_PARAMETERS_PARAGON_METHOD_SETTINGS_UI_SEARCH_ID	6.37467e+17
RESULTS_SEARCH_9_PARAMETERS_PARAGON_METHOD_SETTINGS_UI_START_TIME	2021-01-19 16:10:26
RESULTS_SEARCH_9_PARAMETERS_PARAGON_METHOD_SETTINGS_UI_MIN_UNUSED_PROTSCORE	0.0458
RESULTS_SEARCH_9_PARAMETERS_PARAGON_METHOD_SETTINGS_UI_PSPEP	TRUE
RESULTS_SEARCH_10_time_cpu	106782
RESULTS_SEARCH_10_time_duration	106864
RESULTS_SEARCH_10_version	5.0.1.4874
RESULTS_SEARCH_10_xml:id	SEARCH:2:637466694135747474_4
RESULTS_SEARCH_10_PARAMETERS_chemical_data_edited	FALSE
RESULTS_SEARCH_10_PARAMETERS_do_multiprecursor_search	TRUE
RESULTS_SEARCH_10_PARAMETERS_do_reverse_search	TRUE
RESULTS_SEARCH_10_PARAMETERS_max_quant_labels	35
RESULTS_SEARCH_10_PARAMETERS_maxresults	15
RESULTS_SEARCH_10_PARAMETERS_separate_searches	FALSE
RESULTS_SEARCH_10_PARAMETERS_MSTOLERANCE_type	dalton
RESULTS_SEARCH_10_PARAMETERS_MSTOLERANCE_value	0.05
RESULTS_SEARCH_10_PARAMETERS_MSMSTOLERANCE_type	dalton
RESULTS_SEARCH_10_PARAMETERS_MSMSTOLERANCE_value	0.1
RESULTS_SEARCH_10_PARAMETERS_MS_STANDARD_DEVIATION_type	dalton
RESULTS_SEARCH_10_PARAMETERS_MS_STANDARD_DEVIATION_value	0.0011
RESULTS_SEARCH_10_PARAMETERS_MSMS_STANDARD_DEVIATION_type	dalton
RESULTS_SEARCH_10_PARAMETERS_MSMS_STANDARD_DEVIATION_value	0.01
RESULTS_SEARCH_10_PARAMETERS_FASTA_filename	C:\AB SCIEX\ProteinPilot Data\SearchDatabases\uniprot-zebrafish_with_Clover.fasta
RESULTS_SEARCH_10_PARAMETERS_AUTO_CALIBRATION_ms	TRUE
RESULTS_SEARCH_10_PARAMETERS_AUTO_CALIBRATION_msexport	FALSE
RESULTS_SEARCH_10_PARAMETERS_AUTO_CALIBRATION_msms	TRUE
RESULTS_SEARCH_10_PARAMETERS_AUTO_CALIBRATION_msmstolsdratio	2.75
RESULTS_SEARCH_10_PARAMETERS_AUTO_CALIBRATION_mstolsdratio	7
RESULTS_SEARCH_10_PARAMETERS_AUTO_CALIBRATION_squareroot	TRUE
RESULTS_SEARCH_10_PARAMETERS_AUTO_CALIBRATION_type	dalton
RESULTS_SEARCH_10_PARAMETERS_AUTO_CALIBRATION_MCP_d_s_s_f	0.0666667
RESULTS_SEARCH_10_PARAMETERS_AUTO_CALIBRATION_MCP_d_s_w_f	3
RESULTS_SEARCH_10_PARAMETERS_AUTO_CALIBRATION_MCP_m_f_r_mbc	200
RESULTS_SEARCH_10_PARAMETERS_AUTO_CALIBRATION_MCP_m_m_c	10
RESULTS_SEARCH_10_PARAMETERS_AUTO_CALIBRATION_MCP_m_m_f_s	0.25
RESULTS_SEARCH_10_PARAMETERS_AUTO_CALIBRATION_MCP_m_m_p_f	0.33
RESULTS_SEARCH_10_PARAMETERS_AUTO_CALIBRATION_MCP_m_m_p_rms_f	1
RESULTS_SEARCH_10_PARAMETERS_AUTO_CALIBRATION_MCP_m_p_t_f	1
RESULTS_SEARCH_10_PARAMETERS_AUTO_CALIBRATION_MCP_m_r_h_n_b	15
RESULTS_SEARCH_10_PARAMETERS_AUTO_CALIBRATION_MCP_m_z_n_s	99
RESULTS_SEARCH_10_PARAMETERS_AUTO_CALIBRATION_MCP_m_z_s_mn_f_r	0.0666667
RESULTS_SEARCH_10_PARAMETERS_AUTO_CALIBRATION_MCP_m_z_s_mx_f_r	0.1
RESULTS_SEARCH_10_PARAMETERS_MS_AUTO_CALIBRATION_OUT_avres	-4.56566e-09
RESULTS_SEARCH_10_PARAMETERS_MS_AUTO_CALIBRATION_OUT_c0	9.11996e-05
RESULTS_SEARCH_10_PARAMETERS_MS_AUTO_CALIBRATION_OUT_c1minus1	-7.81834e-06
RESULTS_SEARCH_10_PARAMETERS_MS_AUTO_CALIBRATION_OUT_c2	0
RESULTS_SEARCH_10_PARAMETERS_MS_AUTO_CALIBRATION_OUT_file	5
RESULTS_SEARCH_10_PARAMETERS_MS_AUTO_CALIBRATION_OUT_partnumber	5
RESULTS_SEARCH_10_PARAMETERS_MS_AUTO_CALIBRATION_OUT_polyorder	1
RESULTS_SEARCH_10_PARAMETERS_MS_AUTO_CALIBRATION_OUT_sample	1
RESULTS_SEARCH_10_PARAMETERS_MS_AUTO_CALIBRATION_OUT_squareroot	TRUE
RESULTS_SEARCH_10_PARAMETERS_MSMS_AUTO_CALIBRATION_OUT_avres	-1.05348e-07
RESULTS_SEARCH_10_PARAMETERS_MSMS_AUTO_CALIBRATION_OUT_c0	-3.09003e-05
RESULTS_SEARCH_10_PARAMETERS_MSMS_AUTO_CALIBRATION_OUT_c1minus1	-2.44988e-06
RESULTS_SEARCH_10_PARAMETERS_MSMS_AUTO_CALIBRATION_OUT_c2	0
RESULTS_SEARCH_10_PARAMETERS_MSMS_AUTO_CALIBRATION_OUT_file	5
RESULTS_SEARCH_10_PARAMETERS_MSMS_AUTO_CALIBRATION_OUT_partnumber	5
RESULTS_SEARCH_10_PARAMETERS_MSMS_AUTO_CALIBRATION_OUT_polyorder	1
RESULTS_SEARCH_10_PARAMETERS_MSMS_AUTO_CALIBRATION_OUT_sample	1
RESULTS_SEARCH_10_PARAMETERS_MSMS_AUTO_CALIBRATION_OUT_squareroot	TRUE
RESULTS_SEARCH_10_PARAMETERS_MAX_PRECURSORS_FRAGLET	5
RESULTS_SEARCH_10_PARAMETERS_MAX_PRECURSORS_TAGLET	1
RESULTS_SEARCH_10_PARAMETERS_PRECURSORS_DR_FRAGLET	10
RESULTS_SEARCH_10_PARAMETERS_PRECURSORS_DR_TAGLET	3
RESULTS_SEARCH_10_PARAMETERS_DEFAULT_CHARGE_STATE_1_charge	2
RESULTS_SEARCH_10_PARAMETERS_DEFAULT_CHARGE_STATE_1_probability	1
RESULTS_SEARCH_10_PARAMETERS_DEFAULT_CHARGE_STATE_2_charge	3
RESULTS_SEARCH_10_PARAMETERS_DEFAULT_CHARGE_STATE_2_probability	1
RESULTS_SEARCH_10_PARAMETERS_DEFAULT_CHARGE_STATE_3_charge	4
RESULTS_SEARCH_10_PARAMETERS_DEFAULT_CHARGE_STATE_3_probability	1
RESULTS_SEARCH_10_PARAMETERS_VERSION	5.0.1.0, 4895
RESULTS_SEARCH_10_PARAMETERS_PARAGON_VERSION	5.0.1.0, 4874
RESULTS_SEARCH_10_PARAMETERS_APPLICATION	ProteinPilot(tm) Software
RESULTS_SEARCH_10_PARAMETERS_PROGROUP_alternativedispositionmaximumfoldprobabilitydrop	100
RESULTS_SEARCH_10_PARAMETERS_PROGROUP_alternativedispositionmaximumfoldscoredrop	2
RESULTS_SEARCH_10_PARAMETERS_PROGROUP_autodiscordantpeptidethreshold	0.3
RESULTS_SEARCH_10_PARAMETERS_PROGROUP_bayesconfidencecalclulation	TRUE
RESULTS_SEARCH_10_PARAMETERS_PROGROUP_calibrateconfidence	TRUE
RESULTS_SEARCH_10_PARAMETERS_PROGROUP_compresspeptides	FALSE
RESULTS_SEARCH_10_PARAMETERS_PROGROUP_confidencepercentthresholdforexcludingothersfromquant	15
RESULTS_SEARCH_10_PARAMETERS_PROGROUP_confidencepercentthresholdforincludingselfinquant	15
RESULTS_SEARCH_10_PARAMETERS_PROGROUP_donotstoremspeaklists	FALSE
RESULTS_SEARCH_10_PARAMETERS_PROGROUP_fasta	C:\AB SCIEX\ProteinPilot Data\SearchDatabases\uniprot-zebrafish_with_Clover.fasta
RESULTS_SEARCH_10_PARAMETERS_PROGROUP_featuregroupminpepconf	0.66
RESULTS_SEARCH_10_PARAMETERS_PROGROUP_featuregroupminups	0.47
RESULTS_SEARCH_10_PARAMETERS_PROGROUP_focusingintersection	4
RESULTS_SEARCH_10_PARAMETERS_PROGROUP_focusingminimummatchconfidence	0.1
RESULTS_SEARCH_10_PARAMETERS_PROGROUP_focusingminunusedprotscore	0.1
RESULTS_SEARCH_10_PARAMETERS_PROGROUP_focusingsubsetcutoff	6
RESULTS_SEARCH_10_PARAMETERS_PROGROUP_intersection	1.3
RESULTS_SEARCH_10_PARAMETERS_PROGROUP_minimummatchconfidencecutoff	0.001
RESULTS_SEARCH_10_PARAMETERS_PROGROUP_minunusedprotscore	0.0458
RESULTS_SEARCH_10_PARAMETERS_PROGROUP_subsetcutoff	2
RESULTS_SEARCH_10_PARAMETERS_PROGROUP_unusedprotscorethresholdforexcludingothersfromquant	1.3
RESULTS_SEARCH_10_PARAMETERS_PEAKLIST_count	2251
RESULTS_SEARCH_10_PARAMETERS_PEAKLIST_filenumber	5
RESULTS_SEARCH_10_PARAMETERS_PEAKLIST_original_count	2251
RESULTS_SEARCH_10_PARAMETERS_PEAKLIST_originalfilename	C:\AB SCIEX\ProteinPilot Data\Results\Albert\ZX 20200624 6600\ZX 20200624 C4B 5.wiff
RESULTS_SEARCH_10_PARAMETERS_PEAKLIST_partnumber	5
RESULTS_SEARCH_10_PARAMETERS_QUANT_TYPE_background_correction	FALSE
RESULTS_SEARCH_10_PARAMETERS_QUANT_TYPE_bias_correction	TRUE
RESULTS_SEARCH_10_PARAMETERS_QUANT_TYPE_keep_extreme_peptides_over_fraction	0
RESULTS_SEARCH_10_PARAMETERS_QUANT_TYPE_low_confidence_check	TRUE
RESULTS_SEARCH_10_PARAMETERS_QUANT_TYPE_low_intensity_check	TRUE
RESULTS_SEARCH_10_PARAMETERS_QUANT_TYPE_median_statistic	TRUE
RESULTS_SEARCH_10_PARAMETERS_QUANT_TYPE_mod_check	TRUE
RESULTS_SEARCH_10_PARAMETERS_QUANT_TYPE_quant_threshold	-1
RESULTS_SEARCH_10_PARAMETERS_QUANT_TYPE_quant_threshold_sn	9
RESULTS_SEARCH_10_PARAMETERS_QUANT_TYPE_separate_searches	FALSE
RESULTS_SEARCH_10_PARAMETERS_QUANT_TYPE_shared_msms_check	TRUE
RESULTS_SEARCH_10_PARAMETERS_PARAGON_METHOD_SETTINGS_UI_SAMPLE_TYPE	Identification
RESULTS_SEARCH_10_PARAMETERS_PARAGON_METHOD_SETTINGS_UI_CYS_ALKYLATION	Iodoacetamide w other Cys mods possible
RESULTS_SEARCH_10_PARAMETERS_PARAGON_METHOD_SETTINGS_UI_DIGESTION	Trypsin + Lys C
RESULTS_SEARCH_10_PARAMETERS_PARAGON_METHOD_SETTINGS_UI_SPECIAL_FACTOR	Gel-based ID
RESULTS_SEARCH_10_PARAMETERS_PARAGON_METHOD_SETTINGS_UI_INSTRUMENT	TripleTOF 6600
RESULTS_SEARCH_10_PARAMETERS_PARAGON_METHOD_SETTINGS_UI_SEARCH_EFFORT	Thorough
RESULTS_SEARCH_10_PARAMETERS_PARAGON_METHOD_SETTINGS_UI_USER_NAME	IMB-MASS02\massuser
RESULTS_SEARCH_10_PARAMETERS_PARAGON_METHOD_SETTINGS_UI_MACHINE_NAME	IMB-MASS02
RESULTS_SEARCH_10_PARAMETERS_PARAGON_METHOD_SETTINGS_UI_SEARCH_ID	#VALUE!
RESULTS_SEARCH_10_PARAMETERS_PARAGON_METHOD_SETTINGS_UI_START_TIME	2021-01-19 16:10:26
RESULTS_SEARCH_10_PARAMETERS_PARAGON_METHOD_SETTINGS_UI_MIN_UNUSED_PROTSCORE	0.0458
RESULTS_SEARCH_10_PARAMETERS_PARAGON_METHOD_SETTINGS_UI_PSPEP	TRUE
RESULTS_SEARCH_11_time_cpu	118311
RESULTS_SEARCH_11_time_duration	139921
RESULTS_SEARCH_11_version	5.0.1.4874
RESULTS_SEARCH_11_xml:id	SEARCH:1:637466694135747474_5
RESULTS_SEARCH_11_PARAMETERS_chemical_data_edited	FALSE
RESULTS_SEARCH_11_PARAMETERS_do_multiprecursor_search	TRUE
RESULTS_SEARCH_11_PARAMETERS_do_reverse_search	TRUE
RESULTS_SEARCH_11_PARAMETERS_max_quant_labels	35
RESULTS_SEARCH_11_PARAMETERS_maxresults	15
RESULTS_SEARCH_11_PARAMETERS_separate_searches	FALSE
RESULTS_SEARCH_11_PARAMETERS_MSTOLERANCE_type	dalton
RESULTS_SEARCH_11_PARAMETERS_MSTOLERANCE_value	0.05
RESULTS_SEARCH_11_PARAMETERS_MSMSTOLERANCE_type	dalton
RESULTS_SEARCH_11_PARAMETERS_MSMSTOLERANCE_value	0.1
RESULTS_SEARCH_11_PARAMETERS_MS_STANDARD_DEVIATION_type	dalton
RESULTS_SEARCH_11_PARAMETERS_MS_STANDARD_DEVIATION_value	0.0011
RESULTS_SEARCH_11_PARAMETERS_MSMS_STANDARD_DEVIATION_type	dalton
RESULTS_SEARCH_11_PARAMETERS_MSMS_STANDARD_DEVIATION_value	0.01
RESULTS_SEARCH_11_PARAMETERS_FASTA_filename	C:\AB SCIEX\ProteinPilot Data\SearchDatabases\uniprot-zebrafish_with_Clover.fasta
RESULTS_SEARCH_11_PARAMETERS_AUTO_CALIBRATION_ms	TRUE
RESULTS_SEARCH_11_PARAMETERS_AUTO_CALIBRATION_msexport	FALSE
RESULTS_SEARCH_11_PARAMETERS_AUTO_CALIBRATION_msms	TRUE
RESULTS_SEARCH_11_PARAMETERS_AUTO_CALIBRATION_msmstolsdratio	2.75
RESULTS_SEARCH_11_PARAMETERS_AUTO_CALIBRATION_mstolsdratio	7
RESULTS_SEARCH_11_PARAMETERS_AUTO_CALIBRATION_squareroot	TRUE
RESULTS_SEARCH_11_PARAMETERS_AUTO_CALIBRATION_type	dalton
RESULTS_SEARCH_11_PARAMETERS_AUTO_CALIBRATION_MCP_d_s_s_f	0.0666667
RESULTS_SEARCH_11_PARAMETERS_AUTO_CALIBRATION_MCP_d_s_w_f	3
RESULTS_SEARCH_11_PARAMETERS_AUTO_CALIBRATION_MCP_m_f_r_mbc	200
RESULTS_SEARCH_11_PARAMETERS_AUTO_CALIBRATION_MCP_m_m_c	10
RESULTS_SEARCH_11_PARAMETERS_AUTO_CALIBRATION_MCP_m_m_f_s	0.25
RESULTS_SEARCH_11_PARAMETERS_AUTO_CALIBRATION_MCP_m_m_p_f	0.33
RESULTS_SEARCH_11_PARAMETERS_AUTO_CALIBRATION_MCP_m_m_p_rms_f	1
RESULTS_SEARCH_11_PARAMETERS_AUTO_CALIBRATION_MCP_m_p_t_f	1
RESULTS_SEARCH_11_PARAMETERS_AUTO_CALIBRATION_MCP_m_r_h_n_b	15
RESULTS_SEARCH_11_PARAMETERS_AUTO_CALIBRATION_MCP_m_z_n_s	99
RESULTS_SEARCH_11_PARAMETERS_AUTO_CALIBRATION_MCP_m_z_s_mn_f_r	0.0666667
RESULTS_SEARCH_11_PARAMETERS_AUTO_CALIBRATION_MCP_m_z_s_mx_f_r	0.1
RESULTS_SEARCH_11_PARAMETERS_MS_AUTO_CALIBRATION_OUT_avres	-6.57776e-10
RESULTS_SEARCH_11_PARAMETERS_MS_AUTO_CALIBRATION_OUT_c0	0.000279926
RESULTS_SEARCH_11_PARAMETERS_MS_AUTO_CALIBRATION_OUT_c1minus1	-1.52906e-05
RESULTS_SEARCH_11_PARAMETERS_MS_AUTO_CALIBRATION_OUT_c2	0
RESULTS_SEARCH_11_PARAMETERS_MS_AUTO_CALIBRATION_OUT_file	5
RESULTS_SEARCH_11_PARAMETERS_MS_AUTO_CALIBRATION_OUT_partnumber	6
RESULTS_SEARCH_11_PARAMETERS_MS_AUTO_CALIBRATION_OUT_polyorder	1
RESULTS_SEARCH_11_PARAMETERS_MS_AUTO_CALIBRATION_OUT_sample	1
RESULTS_SEARCH_11_PARAMETERS_MS_AUTO_CALIBRATION_OUT_squareroot	TRUE
RESULTS_SEARCH_11_PARAMETERS_MSMS_AUTO_CALIBRATION_OUT_avres	-3.80447e-08
RESULTS_SEARCH_11_PARAMETERS_MSMS_AUTO_CALIBRATION_OUT_c0	-2.27197e-05
RESULTS_SEARCH_11_PARAMETERS_MSMS_AUTO_CALIBRATION_OUT_c1minus1	-3.11579e-06
RESULTS_SEARCH_11_PARAMETERS_MSMS_AUTO_CALIBRATION_OUT_c2	0
RESULTS_SEARCH_11_PARAMETERS_MSMS_AUTO_CALIBRATION_OUT_file	5
RESULTS_SEARCH_11_PARAMETERS_MSMS_AUTO_CALIBRATION_OUT_partnumber	6
RESULTS_SEARCH_11_PARAMETERS_MSMS_AUTO_CALIBRATION_OUT_polyorder	1
RESULTS_SEARCH_11_PARAMETERS_MSMS_AUTO_CALIBRATION_OUT_sample	1
RESULTS_SEARCH_11_PARAMETERS_MSMS_AUTO_CALIBRATION_OUT_squareroot	TRUE
RESULTS_SEARCH_11_PARAMETERS_MAX_PRECURSORS_FRAGLET	5
RESULTS_SEARCH_11_PARAMETERS_MAX_PRECURSORS_TAGLET	1
RESULTS_SEARCH_11_PARAMETERS_PRECURSORS_DR_FRAGLET	1900-01-10
RESULTS_SEARCH_11_PARAMETERS_PRECURSORS_DR_TAGLET	3
RESULTS_SEARCH_11_PARAMETERS_DEFAULT_CHARGE_STATE_1_charge	2
RESULTS_SEARCH_11_PARAMETERS_DEFAULT_CHARGE_STATE_1_probability	1
RESULTS_SEARCH_11_PARAMETERS_DEFAULT_CHARGE_STATE_2_charge	3
RESULTS_SEARCH_11_PARAMETERS_DEFAULT_CHARGE_STATE_2_probability	1
RESULTS_SEARCH_11_PARAMETERS_DEFAULT_CHARGE_STATE_3_charge	4
RESULTS_SEARCH_11_PARAMETERS_DEFAULT_CHARGE_STATE_3_probability	1
RESULTS_SEARCH_11_PARAMETERS_VERSION	5.0.1.0, 4895
RESULTS_SEARCH_11_PARAMETERS_PARAGON_VERSION	5.0.1.0, 4874
RESULTS_SEARCH_11_PARAMETERS_APPLICATION	ProteinPilot(tm) Software
RESULTS_SEARCH_11_PARAMETERS_PROGROUP_alternativedispositionmaximumfoldprobabilitydrop	100
RESULTS_SEARCH_11_PARAMETERS_PROGROUP_alternativedispositionmaximumfoldscoredrop	2
RESULTS_SEARCH_11_PARAMETERS_PROGROUP_autodiscordantpeptidethreshold	0.3
RESULTS_SEARCH_11_PARAMETERS_PROGROUP_bayesconfidencecalclulation	TRUE
RESULTS_SEARCH_11_PARAMETERS_PROGROUP_calibrateconfidence	TRUE
RESULTS_SEARCH_11_PARAMETERS_PROGROUP_compresspeptides	FALSE
RESULTS_SEARCH_11_PARAMETERS_PROGROUP_confidencepercentthresholdforexcludingothersfromquant	15
RESULTS_SEARCH_11_PARAMETERS_PROGROUP_confidencepercentthresholdforincludingselfinquant	15
RESULTS_SEARCH_11_PARAMETERS_PROGROUP_donotstoremspeaklists	FALSE
RESULTS_SEARCH_11_PARAMETERS_PROGROUP_fasta	C:\AB SCIEX\ProteinPilot Data\SearchDatabases\uniprot-zebrafish_with_Clover.fasta
RESULTS_SEARCH_11_PARAMETERS_PROGROUP_featuregroupminpepconf	0.66
RESULTS_SEARCH_11_PARAMETERS_PROGROUP_featuregroupminups	0.47
RESULTS_SEARCH_11_PARAMETERS_PROGROUP_focusingintersection	4
RESULTS_SEARCH_11_PARAMETERS_PROGROUP_focusingminimummatchconfidence	0.1
RESULTS_SEARCH_11_PARAMETERS_PROGROUP_focusingminunusedprotscore	0.1
RESULTS_SEARCH_11_PARAMETERS_PROGROUP_focusingsubsetcutoff	6
RESULTS_SEARCH_11_PARAMETERS_PROGROUP_intersection	1.3
RESULTS_SEARCH_11_PARAMETERS_PROGROUP_minimummatchconfidencecutoff	0.001
RESULTS_SEARCH_11_PARAMETERS_PROGROUP_minunusedprotscore	0.0458
RESULTS_SEARCH_11_PARAMETERS_PROGROUP_subsetcutoff	2
RESULTS_SEARCH_11_PARAMETERS_PROGROUP_unusedprotscorethresholdforexcludingothersfromquant	1.3
RESULTS_SEARCH_11_PARAMETERS_PEAKLIST_count	2247
RESULTS_SEARCH_11_PARAMETERS_PEAKLIST_filenumber	5
RESULTS_SEARCH_11_PARAMETERS_PEAKLIST_original_count	2247
RESULTS_SEARCH_11_PARAMETERS_PEAKLIST_originalfilename	C:\AB SCIEX\ProteinPilot Data\Results\Albert\ZX 20200624 6600\ZX 20200624 C4B 5.wiff
RESULTS_SEARCH_11_PARAMETERS_PEAKLIST_partnumber	6
RESULTS_SEARCH_11_PARAMETERS_QUANT_TYPE_background_correction	FALSE
RESULTS_SEARCH_11_PARAMETERS_QUANT_TYPE_bias_correction	TRUE
RESULTS_SEARCH_11_PARAMETERS_QUANT_TYPE_keep_extreme_peptides_over_fraction	0
RESULTS_SEARCH_11_PARAMETERS_QUANT_TYPE_low_confidence_check	TRUE
RESULTS_SEARCH_11_PARAMETERS_QUANT_TYPE_low_intensity_check	TRUE
RESULTS_SEARCH_11_PARAMETERS_QUANT_TYPE_median_statistic	TRUE
RESULTS_SEARCH_11_PARAMETERS_QUANT_TYPE_mod_check	TRUE
RESULTS_SEARCH_11_PARAMETERS_QUANT_TYPE_quant_threshold	-1
RESULTS_SEARCH_11_PARAMETERS_QUANT_TYPE_quant_threshold_sn	9
RESULTS_SEARCH_11_PARAMETERS_QUANT_TYPE_separate_searches	FALSE
RESULTS_SEARCH_11_PARAMETERS_QUANT_TYPE_shared_msms_check	TRUE
RESULTS_SEARCH_11_PARAMETERS_PARAGON_METHOD_SETTINGS_UI_SAMPLE_TYPE	Identification
RESULTS_SEARCH_11_PARAMETERS_PARAGON_METHOD_SETTINGS_UI_CYS_ALKYLATION	Iodoacetamide w other Cys mods possible
RESULTS_SEARCH_11_PARAMETERS_PARAGON_METHOD_SETTINGS_UI_DIGESTION	Trypsin + Lys C
RESULTS_SEARCH_11_PARAMETERS_PARAGON_METHOD_SETTINGS_UI_SPECIAL_FACTOR	Gel-based ID
RESULTS_SEARCH_11_PARAMETERS_PARAGON_METHOD_SETTINGS_UI_INSTRUMENT	TripleTOF 6600
RESULTS_SEARCH_11_PARAMETERS_PARAGON_METHOD_SETTINGS_UI_SEARCH_EFFORT	Thorough
RESULTS_SEARCH_11_PARAMETERS_PARAGON_METHOD_SETTINGS_UI_USER_NAME	IMB-MASS02\massuser
RESULTS_SEARCH_11_PARAMETERS_PARAGON_METHOD_SETTINGS_UI_MACHINE_NAME	IMB-MASS02
RESULTS_SEARCH_11_PARAMETERS_PARAGON_METHOD_SETTINGS_UI_SEARCH_ID	6.37467e+17
RESULTS_SEARCH_11_PARAMETERS_PARAGON_METHOD_SETTINGS_UI_START_TIME	2021-01-19 16:10:26
RESULTS_SEARCH_11_PARAMETERS_PARAGON_METHOD_SETTINGS_UI_MIN_UNUSED_PROTSCORE	0.0458
RESULTS_SEARCH_11_PARAMETERS_PARAGON_METHOD_SETTINGS_UI_PSPEP	TRUE
RESULTS_SEARCH_12_time_cpu	144566
RESULTS_SEARCH_12_time_duration	144648
RESULTS_SEARCH_12_version	5.0.1.4874
RESULTS_SEARCH_12_xml:id	SEARCH:2:637466694135747474_5
RESULTS_SEARCH_12_PARAMETERS_chemical_data_edited	FALSE
RESULTS_SEARCH_12_PARAMETERS_do_multiprecursor_search	TRUE
RESULTS_SEARCH_12_PARAMETERS_do_reverse_search	TRUE
RESULTS_SEARCH_12_PARAMETERS_max_quant_labels	35
RESULTS_SEARCH_12_PARAMETERS_maxresults	15
RESULTS_SEARCH_12_PARAMETERS_separate_searches	FALSE
RESULTS_SEARCH_12_PARAMETERS_MSTOLERANCE_type	dalton
RESULTS_SEARCH_12_PARAMETERS_MSTOLERANCE_value	0.05
RESULTS_SEARCH_12_PARAMETERS_MSMSTOLERANCE_type	dalton
RESULTS_SEARCH_12_PARAMETERS_MSMSTOLERANCE_value	0.1
RESULTS_SEARCH_12_PARAMETERS_MS_STANDARD_DEVIATION_type	dalton
RESULTS_SEARCH_12_PARAMETERS_MS_STANDARD_DEVIATION_value	0.0011
RESULTS_SEARCH_12_PARAMETERS_MSMS_STANDARD_DEVIATION_type	dalton
RESULTS_SEARCH_12_PARAMETERS_MSMS_STANDARD_DEVIATION_value	0.01
RESULTS_SEARCH_12_PARAMETERS_FASTA_filename	C:\AB SCIEX\ProteinPilot Data\SearchDatabases\uniprot-zebrafish_with_Clover.fasta
RESULTS_SEARCH_12_PARAMETERS_AUTO_CALIBRATION_ms	TRUE
RESULTS_SEARCH_12_PARAMETERS_AUTO_CALIBRATION_msexport	FALSE
RESULTS_SEARCH_12_PARAMETERS_AUTO_CALIBRATION_msms	TRUE
RESULTS_SEARCH_12_PARAMETERS_AUTO_CALIBRATION_msmstolsdratio	2.75
RESULTS_SEARCH_12_PARAMETERS_AUTO_CALIBRATION_mstolsdratio	7
RESULTS_SEARCH_12_PARAMETERS_AUTO_CALIBRATION_squareroot	TRUE
RESULTS_SEARCH_12_PARAMETERS_AUTO_CALIBRATION_type	dalton
RESULTS_SEARCH_12_PARAMETERS_AUTO_CALIBRATION_MCP_d_s_s_f	0.0666667
RESULTS_SEARCH_12_PARAMETERS_AUTO_CALIBRATION_MCP_d_s_w_f	3
RESULTS_SEARCH_12_PARAMETERS_AUTO_CALIBRATION_MCP_m_f_r_mbc	200
RESULTS_SEARCH_12_PARAMETERS_AUTO_CALIBRATION_MCP_m_m_c	10
RESULTS_SEARCH_12_PARAMETERS_AUTO_CALIBRATION_MCP_m_m_f_s	0.25
RESULTS_SEARCH_12_PARAMETERS_AUTO_CALIBRATION_MCP_m_m_p_f	0.33
RESULTS_SEARCH_12_PARAMETERS_AUTO_CALIBRATION_MCP_m_m_p_rms_f	1
RESULTS_SEARCH_12_PARAMETERS_AUTO_CALIBRATION_MCP_m_p_t_f	1
RESULTS_SEARCH_12_PARAMETERS_AUTO_CALIBRATION_MCP_m_r_h_n_b	15
RESULTS_SEARCH_12_PARAMETERS_AUTO_CALIBRATION_MCP_m_z_n_s	99
RESULTS_SEARCH_12_PARAMETERS_AUTO_CALIBRATION_MCP_m_z_s_mn_f_r	0.0666667
RESULTS_SEARCH_12_PARAMETERS_AUTO_CALIBRATION_MCP_m_z_s_mx_f_r	0.1
RESULTS_SEARCH_12_PARAMETERS_MS_AUTO_CALIBRATION_OUT_avres	-6.57776e-10
RESULTS_SEARCH_12_PARAMETERS_MS_AUTO_CALIBRATION_OUT_c0	0.000279926
RESULTS_SEARCH_12_PARAMETERS_MS_AUTO_CALIBRATION_OUT_c1minus1	-1.52906e-05
RESULTS_SEARCH_12_PARAMETERS_MS_AUTO_CALIBRATION_OUT_c2	0
RESULTS_SEARCH_12_PARAMETERS_MS_AUTO_CALIBRATION_OUT_file	5
RESULTS_SEARCH_12_PARAMETERS_MS_AUTO_CALIBRATION_OUT_partnumber	1900-01-06
RESULTS_SEARCH_12_PARAMETERS_MS_AUTO_CALIBRATION_OUT_polyorder	1
RESULTS_SEARCH_12_PARAMETERS_MS_AUTO_CALIBRATION_OUT_sample	1
RESULTS_SEARCH_12_PARAMETERS_MS_AUTO_CALIBRATION_OUT_squareroot	TRUE
RESULTS_SEARCH_12_PARAMETERS_MSMS_AUTO_CALIBRATION_OUT_avres	-3.80447e-08
RESULTS_SEARCH_12_PARAMETERS_MSMS_AUTO_CALIBRATION_OUT_c0	-2.27197e-05
RESULTS_SEARCH_12_PARAMETERS_MSMS_AUTO_CALIBRATION_OUT_c1minus1	-3.11579e-06
RESULTS_SEARCH_12_PARAMETERS_MSMS_AUTO_CALIBRATION_OUT_c2	0
RESULTS_SEARCH_12_PARAMETERS_MSMS_AUTO_CALIBRATION_OUT_file	5
RESULTS_SEARCH_12_PARAMETERS_MSMS_AUTO_CALIBRATION_OUT_partnumber	6
RESULTS_SEARCH_12_PARAMETERS_MSMS_AUTO_CALIBRATION_OUT_polyorder	1
RESULTS_SEARCH_12_PARAMETERS_MSMS_AUTO_CALIBRATION_OUT_sample	1
RESULTS_SEARCH_12_PARAMETERS_MSMS_AUTO_CALIBRATION_OUT_squareroot	TRUE
RESULTS_SEARCH_12_PARAMETERS_MAX_PRECURSORS_FRAGLET	5
RESULTS_SEARCH_12_PARAMETERS_MAX_PRECURSORS_TAGLET	1
RESULTS_SEARCH_12_PARAMETERS_PRECURSORS_DR_FRAGLET	10
RESULTS_SEARCH_12_PARAMETERS_PRECURSORS_DR_TAGLET	3
RESULTS_SEARCH_12_PARAMETERS_DEFAULT_CHARGE_STATE_1_charge	2
RESULTS_SEARCH_12_PARAMETERS_DEFAULT_CHARGE_STATE_1_probability	1
RESULTS_SEARCH_12_PARAMETERS_DEFAULT_CHARGE_STATE_2_charge	3
RESULTS_SEARCH_12_PARAMETERS_DEFAULT_CHARGE_STATE_2_probability	1
RESULTS_SEARCH_12_PARAMETERS_DEFAULT_CHARGE_STATE_3_charge	4
RESULTS_SEARCH_12_PARAMETERS_DEFAULT_CHARGE_STATE_3_probability	1
RESULTS_SEARCH_12_PARAMETERS_VERSION	5.0.1.0, 4895
RESULTS_SEARCH_12_PARAMETERS_PARAGON_VERSION	5.0.1.0, 4874
RESULTS_SEARCH_12_PARAMETERS_APPLICATION	ProteinPilot(tm) Software
RESULTS_SEARCH_12_PARAMETERS_PROGROUP_alternativedispositionmaximumfoldprobabilitydrop	100
RESULTS_SEARCH_12_PARAMETERS_PROGROUP_alternativedispositionmaximumfoldscoredrop	2
RESULTS_SEARCH_12_PARAMETERS_PROGROUP_autodiscordantpeptidethreshold	0.3
RESULTS_SEARCH_12_PARAMETERS_PROGROUP_bayesconfidencecalclulation	TRUE
RESULTS_SEARCH_12_PARAMETERS_PROGROUP_calibrateconfidence	TRUE
RESULTS_SEARCH_12_PARAMETERS_PROGROUP_compresspeptides	FALSE
RESULTS_SEARCH_12_PARAMETERS_PROGROUP_confidencepercentthresholdforexcludingothersfromquant	1900-01-15
RESULTS_SEARCH_12_PARAMETERS_PROGROUP_confidencepercentthresholdforincludingselfinquant	15
RESULTS_SEARCH_12_PARAMETERS_PROGROUP_donotstoremspeaklists	FALSE
RESULTS_SEARCH_12_PARAMETERS_PROGROUP_fasta	C:\AB SCIEX\ProteinPilot Data\SearchDatabases\uniprot-zebrafish_with_Clover.fasta
RESULTS_SEARCH_12_PARAMETERS_PROGROUP_featuregroupminpepconf	0.66
RESULTS_SEARCH_12_PARAMETERS_PROGROUP_featuregroupminups	0.47
RESULTS_SEARCH_12_PARAMETERS_PROGROUP_focusingintersection	4
RESULTS_SEARCH_12_PARAMETERS_PROGROUP_focusingminimummatchconfidence	0.1
RESULTS_SEARCH_12_PARAMETERS_PROGROUP_focusingminunusedprotscore	0.1
RESULTS_SEARCH_12_PARAMETERS_PROGROUP_focusingsubsetcutoff	6
RESULTS_SEARCH_12_PARAMETERS_PROGROUP_intersection	1.3
RESULTS_SEARCH_12_PARAMETERS_PROGROUP_minimummatchconfidencecutoff	0.001
RESULTS_SEARCH_12_PARAMETERS_PROGROUP_minunusedprotscore	0.0458
RESULTS_SEARCH_12_PARAMETERS_PROGROUP_subsetcutoff	2
RESULTS_SEARCH_12_PARAMETERS_PROGROUP_unusedprotscorethresholdforexcludingothersfromquant	1.3
RESULTS_SEARCH_12_PARAMETERS_PEAKLIST_count	2247
RESULTS_SEARCH_12_PARAMETERS_PEAKLIST_filenumber	5
RESULTS_SEARCH_12_PARAMETERS_PEAKLIST_original_count	2247
RESULTS_SEARCH_12_PARAMETERS_PEAKLIST_originalfilename	C:\AB SCIEX\ProteinPilot Data\Results\Albert\ZX 20200624 6600\ZX 20200624 C4B 5.wiff
RESULTS_SEARCH_12_PARAMETERS_PEAKLIST_partnumber	1900-01-06
RESULTS_SEARCH_12_PARAMETERS_QUANT_TYPE_background_correction	FALSE
RESULTS_SEARCH_12_PARAMETERS_QUANT_TYPE_bias_correction	TRUE
RESULTS_SEARCH_12_PARAMETERS_QUANT_TYPE_keep_extreme_peptides_over_fraction	0
RESULTS_SEARCH_12_PARAMETERS_QUANT_TYPE_low_confidence_check	TRUE
RESULTS_SEARCH_12_PARAMETERS_QUANT_TYPE_low_intensity_check	TRUE
RESULTS_SEARCH_12_PARAMETERS_QUANT_TYPE_median_statistic	TRUE
RESULTS_SEARCH_12_PARAMETERS_QUANT_TYPE_mod_check	TRUE
RESULTS_SEARCH_12_PARAMETERS_QUANT_TYPE_quant_threshold	-1
RESULTS_SEARCH_12_PARAMETERS_QUANT_TYPE_quant_threshold_sn	9
RESULTS_SEARCH_12_PARAMETERS_QUANT_TYPE_separate_searches	FALSE
RESULTS_SEARCH_12_PARAMETERS_QUANT_TYPE_shared_msms_check	TRUE
RESULTS_SEARCH_12_PARAMETERS_PARAGON_METHOD_SETTINGS_UI_SAMPLE_TYPE	Identification
RESULTS_SEARCH_12_PARAMETERS_PARAGON_METHOD_SETTINGS_UI_CYS_ALKYLATION	Iodoacetamide w other Cys mods possible
RESULTS_SEARCH_12_PARAMETERS_PARAGON_METHOD_SETTINGS_UI_DIGESTION	Trypsin + Lys C
RESULTS_SEARCH_12_PARAMETERS_PARAGON_METHOD_SETTINGS_UI_SPECIAL_FACTOR	Gel-based ID
RESULTS_SEARCH_12_PARAMETERS_PARAGON_METHOD_SETTINGS_UI_INSTRUMENT	TripleTOF 6600
RESULTS_SEARCH_12_PARAMETERS_PARAGON_METHOD_SETTINGS_UI_SEARCH_EFFORT	Thorough
RESULTS_SEARCH_12_PARAMETERS_PARAGON_METHOD_SETTINGS_UI_USER_NAME	IMB-MASS02\massuser
RESULTS_SEARCH_12_PARAMETERS_PARAGON_METHOD_SETTINGS_UI_MACHINE_NAME	IMB-MASS02
RESULTS_SEARCH_12_PARAMETERS_PARAGON_METHOD_SETTINGS_UI_SEARCH_ID	6.37467e+17
RESULTS_SEARCH_12_PARAMETERS_PARAGON_METHOD_SETTINGS_UI_START_TIME	2021-01-19 16:10:26
RESULTS_SEARCH_12_PARAMETERS_PARAGON_METHOD_SETTINGS_UI_MIN_UNUSED_PROTSCORE	01:05:57.120000
RESULTS_SEARCH_12_PARAMETERS_PARAGON_METHOD_SETTINGS_UI_PSPEP	TRUE
RESULTS_SEARCH_13_time_cpu	318600
RESULTS_SEARCH_13_time_duration	2874-09-14
RESULTS_SEARCH_13_version	5.0.1.4874
RESULTS_SEARCH_13_xml:id	SEARCH:1:637466694135747474_6
RESULTS_SEARCH_13_PARAMETERS_chemical_data_edited	FALSE
RESULTS_SEARCH_13_PARAMETERS_do_multiprecursor_search	TRUE
RESULTS_SEARCH_13_PARAMETERS_do_reverse_search	TRUE
RESULTS_SEARCH_13_PARAMETERS_max_quant_labels	35
RESULTS_SEARCH_13_PARAMETERS_maxresults	15
RESULTS_SEARCH_13_PARAMETERS_separate_searches	FALSE
RESULTS_SEARCH_13_PARAMETERS_MSTOLERANCE_type	dalton
RESULTS_SEARCH_13_PARAMETERS_MSTOLERANCE_value	0.05
RESULTS_SEARCH_13_PARAMETERS_MSMSTOLERANCE_type	dalton
RESULTS_SEARCH_13_PARAMETERS_MSMSTOLERANCE_value	0.1
RESULTS_SEARCH_13_PARAMETERS_MS_STANDARD_DEVIATION_type	dalton
RESULTS_SEARCH_13_PARAMETERS_MS_STANDARD_DEVIATION_value	0.0011
RESULTS_SEARCH_13_PARAMETERS_MSMS_STANDARD_DEVIATION_type	dalton
RESULTS_SEARCH_13_PARAMETERS_MSMS_STANDARD_DEVIATION_value	0.01
RESULTS_SEARCH_13_PARAMETERS_FASTA_filename	C:\AB SCIEX\ProteinPilot Data\SearchDatabases\uniprot-zebrafish_with_Clover.fasta
RESULTS_SEARCH_13_PARAMETERS_AUTO_CALIBRATION_ms	TRUE
RESULTS_SEARCH_13_PARAMETERS_AUTO_CALIBRATION_msexport	FALSE
RESULTS_SEARCH_13_PARAMETERS_AUTO_CALIBRATION_msms	TRUE
RESULTS_SEARCH_13_PARAMETERS_AUTO_CALIBRATION_msmstolsdratio	2.75
RESULTS_SEARCH_13_PARAMETERS_AUTO_CALIBRATION_mstolsdratio	7
RESULTS_SEARCH_13_PARAMETERS_AUTO_CALIBRATION_squareroot	TRUE
RESULTS_SEARCH_13_PARAMETERS_AUTO_CALIBRATION_type	dalton
RESULTS_SEARCH_13_PARAMETERS_AUTO_CALIBRATION_MCP_d_s_s_f	0.0666667
RESULTS_SEARCH_13_PARAMETERS_AUTO_CALIBRATION_MCP_d_s_w_f	3
RESULTS_SEARCH_13_PARAMETERS_AUTO_CALIBRATION_MCP_m_f_r_mbc	200
RESULTS_SEARCH_13_PARAMETERS_AUTO_CALIBRATION_MCP_m_m_c	10
RESULTS_SEARCH_13_PARAMETERS_AUTO_CALIBRATION_MCP_m_m_f_s	0.25
RESULTS_SEARCH_13_PARAMETERS_AUTO_CALIBRATION_MCP_m_m_p_f	0.33
RESULTS_SEARCH_13_PARAMETERS_AUTO_CALIBRATION_MCP_m_m_p_rms_f	1
RESULTS_SEARCH_13_PARAMETERS_AUTO_CALIBRATION_MCP_m_p_t_f	1
RESULTS_SEARCH_13_PARAMETERS_AUTO_CALIBRATION_MCP_m_r_h_n_b	15
RESULTS_SEARCH_13_PARAMETERS_AUTO_CALIBRATION_MCP_m_z_n_s	99
RESULTS_SEARCH_13_PARAMETERS_AUTO_CALIBRATION_MCP_m_z_s_mn_f_r	0.0666667
RESULTS_SEARCH_13_PARAMETERS_AUTO_CALIBRATION_MCP_m_z_s_mx_f_r	0.1
RESULTS_SEARCH_13_PARAMETERS_MAX_PRECURSORS_FRAGLET	5
RESULTS_SEARCH_13_PARAMETERS_MAX_PRECURSORS_TAGLET	1
RESULTS_SEARCH_13_PARAMETERS_PRECURSORS_DR_FRAGLET	10
RESULTS_SEARCH_13_PARAMETERS_PRECURSORS_DR_TAGLET	3
RESULTS_SEARCH_13_PARAMETERS_DEFAULT_CHARGE_STATE_1_charge	2
RESULTS_SEARCH_13_PARAMETERS_DEFAULT_CHARGE_STATE_1_probability	1
RESULTS_SEARCH_13_PARAMETERS_DEFAULT_CHARGE_STATE_2_charge	3
RESULTS_SEARCH_13_PARAMETERS_DEFAULT_CHARGE_STATE_2_probability	1
RESULTS_SEARCH_13_PARAMETERS_DEFAULT_CHARGE_STATE_3_charge	4
RESULTS_SEARCH_13_PARAMETERS_DEFAULT_CHARGE_STATE_3_probability	1
RESULTS_SEARCH_13_PARAMETERS_VERSION	5.0.1.0, 4895
RESULTS_SEARCH_13_PARAMETERS_PARAGON_VERSION	5.0.1.0, 4874
RESULTS_SEARCH_13_PARAMETERS_APPLICATION	ProteinPilot(tm) Software
RESULTS_SEARCH_13_PARAMETERS_PROGROUP_alternativedispositionmaximumfoldprobabilitydrop	100
RESULTS_SEARCH_13_PARAMETERS_PROGROUP_alternativedispositionmaximumfoldscoredrop	2
RESULTS_SEARCH_13_PARAMETERS_PROGROUP_autodiscordantpeptidethreshold	0.3
RESULTS_SEARCH_13_PARAMETERS_PROGROUP_bayesconfidencecalclulation	TRUE
RESULTS_SEARCH_13_PARAMETERS_PROGROUP_calibrateconfidence	TRUE
RESULTS_SEARCH_13_PARAMETERS_PROGROUP_compresspeptides	FALSE
RESULTS_SEARCH_13_PARAMETERS_PROGROUP_confidencepercentthresholdforexcludingothersfromquant	15
RESULTS_SEARCH_13_PARAMETERS_PROGROUP_confidencepercentthresholdforincludingselfinquant	15
RESULTS_SEARCH_13_PARAMETERS_PROGROUP_donotstoremspeaklists	FALSE
RESULTS_SEARCH_13_PARAMETERS_PROGROUP_fasta	C:\AB SCIEX\ProteinPilot Data\SearchDatabases\uniprot-zebrafish_with_Clover.fasta
RESULTS_SEARCH_13_PARAMETERS_PROGROUP_featuregroupminpepconf	0.66
RESULTS_SEARCH_13_PARAMETERS_PROGROUP_featuregroupminups	0.47
RESULTS_SEARCH_13_PARAMETERS_PROGROUP_focusingintersection	4
RESULTS_SEARCH_13_PARAMETERS_PROGROUP_focusingminimummatchconfidence	0.1
RESULTS_SEARCH_13_PARAMETERS_PROGROUP_focusingminunusedprotscore	02:24:00
RESULTS_SEARCH_13_PARAMETERS_PROGROUP_focusingsubsetcutoff	6
RESULTS_SEARCH_13_PARAMETERS_PROGROUP_intersection	1.3
RESULTS_SEARCH_13_PARAMETERS_PROGROUP_minimummatchconfidencecutoff	0.001
RESULTS_SEARCH_13_PARAMETERS_PROGROUP_minunusedprotscore	0.0458
RESULTS_SEARCH_13_PARAMETERS_PROGROUP_subsetcutoff	2
RESULTS_SEARCH_13_PARAMETERS_PROGROUP_unusedprotscorethresholdforexcludingothersfromquant	1.3
RESULTS_SEARCH_13_PARAMETERS_PEAKLIST_count	2655
RESULTS_SEARCH_13_PARAMETERS_PEAKLIST_filenumber	6
RESULTS_SEARCH_13_PARAMETERS_PEAKLIST_original_count	2655
RESULTS_SEARCH_13_PARAMETERS_PEAKLIST_originalfilename	C:\AB SCIEX\ProteinPilot Data\Results\Albert\ZX 20200624 6600\ZX 20200624 C4B 6.wiff
RESULTS_SEARCH_13_PARAMETERS_PEAKLIST_partnumber	7
RESULTS_SEARCH_13_PARAMETERS_QUANT_TYPE_background_correction	FALSE
RESULTS_SEARCH_13_PARAMETERS_QUANT_TYPE_bias_correction	TRUE
RESULTS_SEARCH_13_PARAMETERS_QUANT_TYPE_keep_extreme_peptides_over_fraction	0
RESULTS_SEARCH_13_PARAMETERS_QUANT_TYPE_low_confidence_check	TRUE
RESULTS_SEARCH_13_PARAMETERS_QUANT_TYPE_low_intensity_check	TRUE
RESULTS_SEARCH_13_PARAMETERS_QUANT_TYPE_median_statistic	TRUE
RESULTS_SEARCH_13_PARAMETERS_QUANT_TYPE_mod_check	TRUE
RESULTS_SEARCH_13_PARAMETERS_QUANT_TYPE_quant_threshold	-1
RESULTS_SEARCH_13_PARAMETERS_QUANT_TYPE_quant_threshold_sn	9
RESULTS_SEARCH_13_PARAMETERS_QUANT_TYPE_separate_searches	FALSE
RESULTS_SEARCH_13_PARAMETERS_QUANT_TYPE_shared_msms_check	TRUE
RESULTS_SEARCH_13_PARAMETERS_PARAGON_METHOD_SETTINGS_UI_SAMPLE_TYPE	Identification
RESULTS_SEARCH_13_PARAMETERS_PARAGON_METHOD_SETTINGS_UI_CYS_ALKYLATION	Iodoacetamide w other Cys mods possible
RESULTS_SEARCH_13_PARAMETERS_PARAGON_METHOD_SETTINGS_UI_DIGESTION	Trypsin + Lys C
RESULTS_SEARCH_13_PARAMETERS_PARAGON_METHOD_SETTINGS_UI_SPECIAL_FACTOR	Gel-based ID
RESULTS_SEARCH_13_PARAMETERS_PARAGON_METHOD_SETTINGS_UI_INSTRUMENT	TripleTOF 6600
RESULTS_SEARCH_13_PARAMETERS_PARAGON_METHOD_SETTINGS_UI_SEARCH_EFFORT	Thorough
RESULTS_SEARCH_13_PARAMETERS_PARAGON_METHOD_SETTINGS_UI_USER_NAME	IMB-MASS02\massuser
RESULTS_SEARCH_13_PARAMETERS_PARAGON_METHOD_SETTINGS_UI_MACHINE_NAME	IMB-MASS02
RESULTS_SEARCH_13_PARAMETERS_PARAGON_METHOD_SETTINGS_UI_SEARCH_ID	6.37467e+17
RESULTS_SEARCH_13_PARAMETERS_PARAGON_METHOD_SETTINGS_UI_START_TIME	2021-01-19 16:10:26
RESULTS_SEARCH_13_PARAMETERS_PARAGON_METHOD_SETTINGS_UI_MIN_UNUSED_PROTSCORE	0.0458
RESULTS_SEARCH_13_PARAMETERS_PARAGON_METHOD_SETTINGS_UI_PSPEP	TRUE
RESULTS_SEARCH_14_time_cpu	213846
RESULTS_SEARCH_14_time_duration	213899
RESULTS_SEARCH_14_version	5.0.1.4874
RESULTS_SEARCH_14_xml:id	SEARCH:2:637466694135747474_6
RESULTS_SEARCH_14_PARAMETERS_chemical_data_edited	FALSE
RESULTS_SEARCH_14_PARAMETERS_do_multiprecursor_search	TRUE
RESULTS_SEARCH_14_PARAMETERS_do_reverse_search	TRUE
RESULTS_SEARCH_14_PARAMETERS_max_quant_labels	35
RESULTS_SEARCH_14_PARAMETERS_maxresults	15
RESULTS_SEARCH_14_PARAMETERS_separate_searches	FALSE
RESULTS_SEARCH_14_PARAMETERS_MSTOLERANCE_type	dalton
RESULTS_SEARCH_14_PARAMETERS_MSTOLERANCE_value	0.05
RESULTS_SEARCH_14_PARAMETERS_MSMSTOLERANCE_type	dalton
RESULTS_SEARCH_14_PARAMETERS_MSMSTOLERANCE_value	0.1
RESULTS_SEARCH_14_PARAMETERS_MS_STANDARD_DEVIATION_type	dalton
RESULTS_SEARCH_14_PARAMETERS_MS_STANDARD_DEVIATION_value	0.0011
RESULTS_SEARCH_14_PARAMETERS_MSMS_STANDARD_DEVIATION_type	dalton
RESULTS_SEARCH_14_PARAMETERS_MSMS_STANDARD_DEVIATION_value	0.01
RESULTS_SEARCH_14_PARAMETERS_FASTA_filename	C:\AB SCIEX\ProteinPilot Data\SearchDatabases\uniprot-zebrafish_with_Clover.fasta
RESULTS_SEARCH_14_PARAMETERS_AUTO_CALIBRATION_ms	TRUE
RESULTS_SEARCH_14_PARAMETERS_AUTO_CALIBRATION_msexport	FALSE
RESULTS_SEARCH_14_PARAMETERS_AUTO_CALIBRATION_msms	TRUE
RESULTS_SEARCH_14_PARAMETERS_AUTO_CALIBRATION_msmstolsdratio	2.75
RESULTS_SEARCH_14_PARAMETERS_AUTO_CALIBRATION_mstolsdratio	7
RESULTS_SEARCH_14_PARAMETERS_AUTO_CALIBRATION_squareroot	TRUE
RESULTS_SEARCH_14_PARAMETERS_AUTO_CALIBRATION_type	dalton
RESULTS_SEARCH_14_PARAMETERS_AUTO_CALIBRATION_MCP_d_s_s_f	0.0666667
RESULTS_SEARCH_14_PARAMETERS_AUTO_CALIBRATION_MCP_d_s_w_f	3
RESULTS_SEARCH_14_PARAMETERS_AUTO_CALIBRATION_MCP_m_f_r_mbc	200
RESULTS_SEARCH_14_PARAMETERS_AUTO_CALIBRATION_MCP_m_m_c	10
RESULTS_SEARCH_14_PARAMETERS_AUTO_CALIBRATION_MCP_m_m_f_s	0.25
RESULTS_SEARCH_14_PARAMETERS_AUTO_CALIBRATION_MCP_m_m_p_f	0.33
RESULTS_SEARCH_14_PARAMETERS_AUTO_CALIBRATION_MCP_m_m_p_rms_f	1
RESULTS_SEARCH_14_PARAMETERS_AUTO_CALIBRATION_MCP_m_p_t_f	1
RESULTS_SEARCH_14_PARAMETERS_AUTO_CALIBRATION_MCP_m_r_h_n_b	15
RESULTS_SEARCH_14_PARAMETERS_AUTO_CALIBRATION_MCP_m_z_n_s	99
RESULTS_SEARCH_14_PARAMETERS_AUTO_CALIBRATION_MCP_m_z_s_mn_f_r	0.0666667
RESULTS_SEARCH_14_PARAMETERS_AUTO_CALIBRATION_MCP_m_z_s_mx_f_r	0.1
RESULTS_SEARCH_14_PARAMETERS_MAX_PRECURSORS_FRAGLET	5
RESULTS_SEARCH_14_PARAMETERS_MAX_PRECURSORS_TAGLET	1
RESULTS_SEARCH_14_PARAMETERS_PRECURSORS_DR_FRAGLET	10
RESULTS_SEARCH_14_PARAMETERS_PRECURSORS_DR_TAGLET	3
RESULTS_SEARCH_14_PARAMETERS_DEFAULT_CHARGE_STATE_1_charge	2
RESULTS_SEARCH_14_PARAMETERS_DEFAULT_CHARGE_STATE_1_probability	1
RESULTS_SEARCH_14_PARAMETERS_DEFAULT_CHARGE_STATE_2_charge	3
RESULTS_SEARCH_14_PARAMETERS_DEFAULT_CHARGE_STATE_2_probability	1
RESULTS_SEARCH_14_PARAMETERS_DEFAULT_CHARGE_STATE_3_charge	4
RESULTS_SEARCH_14_PARAMETERS_DEFAULT_CHARGE_STATE_3_probability	1
RESULTS_SEARCH_14_PARAMETERS_VERSION	5.0.1.0, 4895
RESULTS_SEARCH_14_PARAMETERS_PARAGON_VERSION	5.0.1.0, 4874
RESULTS_SEARCH_14_PARAMETERS_APPLICATION	ProteinPilot(tm) Software
RESULTS_SEARCH_14_PARAMETERS_PROGROUP_alternativedispositionmaximumfoldprobabilitydrop	100
RESULTS_SEARCH_14_PARAMETERS_PROGROUP_alternativedispositionmaximumfoldscoredrop	2
RESULTS_SEARCH_14_PARAMETERS_PROGROUP_autodiscordantpeptidethreshold	0.3
RESULTS_SEARCH_14_PARAMETERS_PROGROUP_bayesconfidencecalclulation	TRUE
RESULTS_SEARCH_14_PARAMETERS_PROGROUP_calibrateconfidence	TRUE
RESULTS_SEARCH_14_PARAMETERS_PROGROUP_compresspeptides	FALSE
RESULTS_SEARCH_14_PARAMETERS_PROGROUP_confidencepercentthresholdforexcludingothersfromquant	15
RESULTS_SEARCH_14_PARAMETERS_PROGROUP_confidencepercentthresholdforincludingselfinquant	15
RESULTS_SEARCH_14_PARAMETERS_PROGROUP_donotstoremspeaklists	FALSE
RESULTS_SEARCH_14_PARAMETERS_PROGROUP_fasta	C:\AB SCIEX\ProteinPilot Data\SearchDatabases\uniprot-zebrafish_with_Clover.fasta
RESULTS_SEARCH_14_PARAMETERS_PROGROUP_featuregroupminpepconf	0.66
RESULTS_SEARCH_14_PARAMETERS_PROGROUP_featuregroupminups	0.47
RESULTS_SEARCH_14_PARAMETERS_PROGROUP_focusingintersection	4
RESULTS_SEARCH_14_PARAMETERS_PROGROUP_focusingminimummatchconfidence	0.1
RESULTS_SEARCH_14_PARAMETERS_PROGROUP_focusingminunusedprotscore	0.1
RESULTS_SEARCH_14_PARAMETERS_PROGROUP_focusingsubsetcutoff	6
RESULTS_SEARCH_14_PARAMETERS_PROGROUP_intersection	1.3
RESULTS_SEARCH_14_PARAMETERS_PROGROUP_minimummatchconfidencecutoff	0.001
RESULTS_SEARCH_14_PARAMETERS_PROGROUP_minunusedprotscore	0.0458
RESULTS_SEARCH_14_PARAMETERS_PROGROUP_subsetcutoff	2
RESULTS_SEARCH_14_PARAMETERS_PROGROUP_unusedprotscorethresholdforexcludingothersfromquant	1.3
RESULTS_SEARCH_14_PARAMETERS_PEAKLIST_count	2655
RESULTS_SEARCH_14_PARAMETERS_PEAKLIST_filenumber	6
RESULTS_SEARCH_14_PARAMETERS_PEAKLIST_original_count	2655
RESULTS_SEARCH_14_PARAMETERS_PEAKLIST_originalfilename	C:\AB SCIEX\ProteinPilot Data\Results\Albert\ZX 20200624 6600\ZX 20200624 C4B 6.wiff
RESULTS_SEARCH_14_PARAMETERS_PEAKLIST_partnumber	7
RESULTS_SEARCH_14_PARAMETERS_QUANT_TYPE_background_correction	FALSE
RESULTS_SEARCH_14_PARAMETERS_QUANT_TYPE_bias_correction	TRUE
RESULTS_SEARCH_14_PARAMETERS_QUANT_TYPE_keep_extreme_peptides_over_fraction	0
RESULTS_SEARCH_14_PARAMETERS_QUANT_TYPE_low_confidence_check	TRUE
RESULTS_SEARCH_14_PARAMETERS_QUANT_TYPE_low_intensity_check	TRUE
RESULTS_SEARCH_14_PARAMETERS_QUANT_TYPE_median_statistic	TRUE
RESULTS_SEARCH_14_PARAMETERS_QUANT_TYPE_mod_check	TRUE
RESULTS_SEARCH_14_PARAMETERS_QUANT_TYPE_quant_threshold	-1
RESULTS_SEARCH_14_PARAMETERS_QUANT_TYPE_quant_threshold_sn	9
RESULTS_SEARCH_14_PARAMETERS_QUANT_TYPE_separate_searches	FALSE
RESULTS_SEARCH_14_PARAMETERS_QUANT_TYPE_shared_msms_check	TRUE
RESULTS_SEARCH_14_PARAMETERS_PARAGON_METHOD_SETTINGS_UI_SAMPLE_TYPE	Identification
RESULTS_SEARCH_14_PARAMETERS_PARAGON_METHOD_SETTINGS_UI_CYS_ALKYLATION	Iodoacetamide w other Cys mods possible
RESULTS_SEARCH_14_PARAMETERS_PARAGON_METHOD_SETTINGS_UI_DIGESTION	Trypsin + Lys C
RESULTS_SEARCH_14_PARAMETERS_PARAGON_METHOD_SETTINGS_UI_SPECIAL_FACTOR	Gel-based ID
RESULTS_SEARCH_14_PARAMETERS_PARAGON_METHOD_SETTINGS_UI_INSTRUMENT	TripleTOF 6600
RESULTS_SEARCH_14_PARAMETERS_PARAGON_METHOD_SETTINGS_UI_SEARCH_EFFORT	Thorough
RESULTS_SEARCH_14_PARAMETERS_PARAGON_METHOD_SETTINGS_UI_USER_NAME	IMB-MASS02\massuser
RESULTS_SEARCH_14_PARAMETERS_PARAGON_METHOD_SETTINGS_UI_MACHINE_NAME	IMB-MASS02
RESULTS_SEARCH_14_PARAMETERS_PARAGON_METHOD_SETTINGS_UI_SEARCH_ID	6.37467e+17
RESULTS_SEARCH_14_PARAMETERS_PARAGON_METHOD_SETTINGS_UI_START_TIME	2021-01-19 16:10:26
RESULTS_SEARCH_14_PARAMETERS_PARAGON_METHOD_SETTINGS_UI_MIN_UNUSED_PROTSCORE	0.0458
RESULTS_SEARCH_14_PARAMETERS_PARAGON_METHOD_SETTINGS_UI_PSPEP	TRUE
RESULTS_SEARCH_15_time_cpu	244500
RESULTS_SEARCH_15_time_duration	271403
RESULTS_SEARCH_15_version	5.0.1.4874
RESULTS_SEARCH_15_xml:id	SEARCH:1:637466694135747474_7
RESULTS_SEARCH_15_PARAMETERS_chemical_data_edited	FALSE
RESULTS_SEARCH_15_PARAMETERS_do_multiprecursor_search	TRUE
RESULTS_SEARCH_15_PARAMETERS_do_reverse_search	TRUE
RESULTS_SEARCH_15_PARAMETERS_max_quant_labels	35
RESULTS_SEARCH_15_PARAMETERS_maxresults	15
RESULTS_SEARCH_15_PARAMETERS_separate_searches	FALSE
RESULTS_SEARCH_15_PARAMETERS_MSTOLERANCE_type	dalton
RESULTS_SEARCH_15_PARAMETERS_MSTOLERANCE_value	0.05
RESULTS_SEARCH_15_PARAMETERS_MSMSTOLERANCE_type	dalton
RESULTS_SEARCH_15_PARAMETERS_MSMSTOLERANCE_value	0.1
RESULTS_SEARCH_15_PARAMETERS_MS_STANDARD_DEVIATION_type	dalton
RESULTS_SEARCH_15_PARAMETERS_MS_STANDARD_DEVIATION_value	0.0011
RESULTS_SEARCH_15_PARAMETERS_MSMS_STANDARD_DEVIATION_type	dalton
RESULTS_SEARCH_15_PARAMETERS_MSMS_STANDARD_DEVIATION_value	0.01
RESULTS_SEARCH_15_PARAMETERS_FASTA_filename	C:\AB SCIEX\ProteinPilot Data\SearchDatabases\uniprot-zebrafish_with_Clover.fasta
RESULTS_SEARCH_15_PARAMETERS_AUTO_CALIBRATION_ms	TRUE
RESULTS_SEARCH_15_PARAMETERS_AUTO_CALIBRATION_msexport	FALSE
RESULTS_SEARCH_15_PARAMETERS_AUTO_CALIBRATION_msms	TRUE
RESULTS_SEARCH_15_PARAMETERS_AUTO_CALIBRATION_msmstolsdratio	2.75
RESULTS_SEARCH_15_PARAMETERS_AUTO_CALIBRATION_mstolsdratio	7
RESULTS_SEARCH_15_PARAMETERS_AUTO_CALIBRATION_squareroot	TRUE
RESULTS_SEARCH_15_PARAMETERS_AUTO_CALIBRATION_type	dalton
RESULTS_SEARCH_15_PARAMETERS_AUTO_CALIBRATION_MCP_d_s_s_f	0.0666667
RESULTS_SEARCH_15_PARAMETERS_AUTO_CALIBRATION_MCP_d_s_w_f	3
RESULTS_SEARCH_15_PARAMETERS_AUTO_CALIBRATION_MCP_m_f_r_mbc	200
RESULTS_SEARCH_15_PARAMETERS_AUTO_CALIBRATION_MCP_m_m_c	10
RESULTS_SEARCH_15_PARAMETERS_AUTO_CALIBRATION_MCP_m_m_f_s	0.25
RESULTS_SEARCH_15_PARAMETERS_AUTO_CALIBRATION_MCP_m_m_p_f	0.33
RESULTS_SEARCH_15_PARAMETERS_AUTO_CALIBRATION_MCP_m_m_p_rms_f	1
RESULTS_SEARCH_15_PARAMETERS_AUTO_CALIBRATION_MCP_m_p_t_f	1
RESULTS_SEARCH_15_PARAMETERS_AUTO_CALIBRATION_MCP_m_r_h_n_b	15
RESULTS_SEARCH_15_PARAMETERS_AUTO_CALIBRATION_MCP_m_z_n_s	99
RESULTS_SEARCH_15_PARAMETERS_AUTO_CALIBRATION_MCP_m_z_s_mn_f_r	0.0666667
RESULTS_SEARCH_15_PARAMETERS_AUTO_CALIBRATION_MCP_m_z_s_mx_f_r	0.1
RESULTS_SEARCH_15_PARAMETERS_MAX_PRECURSORS_FRAGLET	5
RESULTS_SEARCH_15_PARAMETERS_MAX_PRECURSORS_TAGLET	1
RESULTS_SEARCH_15_PARAMETERS_PRECURSORS_DR_FRAGLET	10
RESULTS_SEARCH_15_PARAMETERS_PRECURSORS_DR_TAGLET	3
RESULTS_SEARCH_15_PARAMETERS_DEFAULT_CHARGE_STATE_1_charge	2
RESULTS_SEARCH_15_PARAMETERS_DEFAULT_CHARGE_STATE_1_probability	1
RESULTS_SEARCH_15_PARAMETERS_DEFAULT_CHARGE_STATE_2_charge	3
RESULTS_SEARCH_15_PARAMETERS_DEFAULT_CHARGE_STATE_2_probability	1
RESULTS_SEARCH_15_PARAMETERS_DEFAULT_CHARGE_STATE_3_charge	4
RESULTS_SEARCH_15_PARAMETERS_DEFAULT_CHARGE_STATE_3_probability	1
RESULTS_SEARCH_15_PARAMETERS_VERSION	5.0.1.0, 4895
RESULTS_SEARCH_15_PARAMETERS_PARAGON_VERSION	5.0.1.0, 4874
RESULTS_SEARCH_15_PARAMETERS_APPLICATION	ProteinPilot(tm) Software
RESULTS_SEARCH_15_PARAMETERS_PROGROUP_alternativedispositionmaximumfoldprobabilitydrop	100
RESULTS_SEARCH_15_PARAMETERS_PROGROUP_alternativedispositionmaximumfoldscoredrop	2
RESULTS_SEARCH_15_PARAMETERS_PROGROUP_autodiscordantpeptidethreshold	0.3
RESULTS_SEARCH_15_PARAMETERS_PROGROUP_bayesconfidencecalclulation	TRUE
RESULTS_SEARCH_15_PARAMETERS_PROGROUP_calibrateconfidence	TRUE
RESULTS_SEARCH_15_PARAMETERS_PROGROUP_compresspeptides	FALSE
RESULTS_SEARCH_15_PARAMETERS_PROGROUP_confidencepercentthresholdforexcludingothersfromquant	15
RESULTS_SEARCH_15_PARAMETERS_PROGROUP_confidencepercentthresholdforincludingselfinquant	15
RESULTS_SEARCH_15_PARAMETERS_PROGROUP_donotstoremspeaklists	FALSE
RESULTS_SEARCH_15_PARAMETERS_PROGROUP_fasta	C:\AB SCIEX\ProteinPilot Data\SearchDatabases\uniprot-zebrafish_with_Clover.fasta
RESULTS_SEARCH_15_PARAMETERS_PROGROUP_featuregroupminpepconf	0.66
RESULTS_SEARCH_15_PARAMETERS_PROGROUP_featuregroupminups	0.47
RESULTS_SEARCH_15_PARAMETERS_PROGROUP_focusingintersection	4
RESULTS_SEARCH_15_PARAMETERS_PROGROUP_focusingminimummatchconfidence	0.1
RESULTS_SEARCH_15_PARAMETERS_PROGROUP_focusingminunusedprotscore	0.1
RESULTS_SEARCH_15_PARAMETERS_PROGROUP_focusingsubsetcutoff	6
RESULTS_SEARCH_15_PARAMETERS_PROGROUP_intersection	1.3
RESULTS_SEARCH_15_PARAMETERS_PROGROUP_minimummatchconfidencecutoff	0.001
RESULTS_SEARCH_15_PARAMETERS_PROGROUP_minunusedprotscore	0.0458
RESULTS_SEARCH_15_PARAMETERS_PROGROUP_subsetcutoff	2
RESULTS_SEARCH_15_PARAMETERS_PROGROUP_unusedprotscorethresholdforexcludingothersfromquant	1.3
RESULTS_SEARCH_15_PARAMETERS_PEAKLIST_count	2382
RESULTS_SEARCH_15_PARAMETERS_PEAKLIST_filenumber	7
RESULTS_SEARCH_15_PARAMETERS_PEAKLIST_original_count	2382
RESULTS_SEARCH_15_PARAMETERS_PEAKLIST_originalfilename	C:\AB SCIEX\ProteinPilot Data\Results\Albert\ZX 20200624 6600\ZX 20200624 C4B 7.wiff
RESULTS_SEARCH_15_PARAMETERS_PEAKLIST_partnumber	8
RESULTS_SEARCH_15_PARAMETERS_QUANT_TYPE_background_correction	FALSE
RESULTS_SEARCH_15_PARAMETERS_QUANT_TYPE_bias_correction	TRUE
RESULTS_SEARCH_15_PARAMETERS_QUANT_TYPE_keep_extreme_peptides_over_fraction	0
RESULTS_SEARCH_15_PARAMETERS_QUANT_TYPE_low_confidence_check	TRUE
RESULTS_SEARCH_15_PARAMETERS_QUANT_TYPE_low_intensity_check	TRUE
RESULTS_SEARCH_15_PARAMETERS_QUANT_TYPE_median_statistic	TRUE
RESULTS_SEARCH_15_PARAMETERS_QUANT_TYPE_mod_check	TRUE
RESULTS_SEARCH_15_PARAMETERS_QUANT_TYPE_quant_threshold	-1
RESULTS_SEARCH_15_PARAMETERS_QUANT_TYPE_quant_threshold_sn	9
RESULTS_SEARCH_15_PARAMETERS_QUANT_TYPE_separate_searches	FALSE
RESULTS_SEARCH_15_PARAMETERS_QUANT_TYPE_shared_msms_check	TRUE
RESULTS_SEARCH_15_PARAMETERS_PARAGON_METHOD_SETTINGS_UI_SAMPLE_TYPE	Identification
RESULTS_SEARCH_15_PARAMETERS_PARAGON_METHOD_SETTINGS_UI_CYS_ALKYLATION	Iodoacetamide w other Cys mods possible
RESULTS_SEARCH_15_PARAMETERS_PARAGON_METHOD_SETTINGS_UI_DIGESTION	Trypsin + Lys C
RESULTS_SEARCH_15_PARAMETERS_PARAGON_METHOD_SETTINGS_UI_SPECIAL_FACTOR	Gel-based ID
RESULTS_SEARCH_15_PARAMETERS_PARAGON_METHOD_SETTINGS_UI_INSTRUMENT	TripleTOF 6600
RESULTS_SEARCH_15_PARAMETERS_PARAGON_METHOD_SETTINGS_UI_SEARCH_EFFORT	Thorough
RESULTS_SEARCH_15_PARAMETERS_PARAGON_METHOD_SETTINGS_UI_USER_NAME	IMB-MASS02\massuser
RESULTS_SEARCH_15_PARAMETERS_PARAGON_METHOD_SETTINGS_UI_MACHINE_NAME	IMB-MASS02
RESULTS_SEARCH_15_PARAMETERS_PARAGON_METHOD_SETTINGS_UI_SEARCH_ID	6.37467e+17
RESULTS_SEARCH_15_PARAMETERS_PARAGON_METHOD_SETTINGS_UI_START_TIME	2021-01-19 16:10:26
RESULTS_SEARCH_15_PARAMETERS_PARAGON_METHOD_SETTINGS_UI_MIN_UNUSED_PROTSCORE	0.0458
RESULTS_SEARCH_15_PARAMETERS_PARAGON_METHOD_SETTINGS_UI_PSPEP	TRUE
RESULTS_SEARCH_16_time_cpu	183176
RESULTS_SEARCH_16_time_duration	183322
RESULTS_SEARCH_16_version	5.0.1.4874
RESULTS_SEARCH_16_xml:id	SEARCH:2:637466694135747474_7
RESULTS_SEARCH_16_PARAMETERS_chemical_data_edited	FALSE
RESULTS_SEARCH_16_PARAMETERS_do_multiprecursor_search	TRUE
RESULTS_SEARCH_16_PARAMETERS_do_reverse_search	TRUE
RESULTS_SEARCH_16_PARAMETERS_max_quant_labels	35
RESULTS_SEARCH_16_PARAMETERS_maxresults	15
RESULTS_SEARCH_16_PARAMETERS_separate_searches	FALSE
RESULTS_SEARCH_16_PARAMETERS_MSTOLERANCE_type	dalton
RESULTS_SEARCH_16_PARAMETERS_MSTOLERANCE_value	0.05
RESULTS_SEARCH_16_PARAMETERS_MSMSTOLERANCE_type	dalton
RESULTS_SEARCH_16_PARAMETERS_MSMSTOLERANCE_value	0.1
RESULTS_SEARCH_16_PARAMETERS_MS_STANDARD_DEVIATION_type	dalton
RESULTS_SEARCH_16_PARAMETERS_MS_STANDARD_DEVIATION_value	0.0011
RESULTS_SEARCH_16_PARAMETERS_MSMS_STANDARD_DEVIATION_type	dalton
RESULTS_SEARCH_16_PARAMETERS_MSMS_STANDARD_DEVIATION_value	0.01
RESULTS_SEARCH_16_PARAMETERS_FASTA_filename	C:\AB SCIEX\ProteinPilot Data\SearchDatabases\uniprot-zebrafish_with_Clover.fasta
RESULTS_SEARCH_16_PARAMETERS_AUTO_CALIBRATION_ms	TRUE
RESULTS_SEARCH_16_PARAMETERS_AUTO_CALIBRATION_msexport	FALSE
RESULTS_SEARCH_16_PARAMETERS_AUTO_CALIBRATION_msms	TRUE
RESULTS_SEARCH_16_PARAMETERS_AUTO_CALIBRATION_msmstolsdratio	2.75
RESULTS_SEARCH_16_PARAMETERS_AUTO_CALIBRATION_mstolsdratio	7
RESULTS_SEARCH_16_PARAMETERS_AUTO_CALIBRATION_squareroot	TRUE
RESULTS_SEARCH_16_PARAMETERS_AUTO_CALIBRATION_type	dalton
RESULTS_SEARCH_16_PARAMETERS_AUTO_CALIBRATION_MCP_d_s_s_f	0.0666667
RESULTS_SEARCH_16_PARAMETERS_AUTO_CALIBRATION_MCP_d_s_w_f	3
RESULTS_SEARCH_16_PARAMETERS_AUTO_CALIBRATION_MCP_m_f_r_mbc	200
RESULTS_SEARCH_16_PARAMETERS_AUTO_CALIBRATION_MCP_m_m_c	10
RESULTS_SEARCH_16_PARAMETERS_AUTO_CALIBRATION_MCP_m_m_f_s	0.25
RESULTS_SEARCH_16_PARAMETERS_AUTO_CALIBRATION_MCP_m_m_p_f	0.33
RESULTS_SEARCH_16_PARAMETERS_AUTO_CALIBRATION_MCP_m_m_p_rms_f	1
RESULTS_SEARCH_16_PARAMETERS_AUTO_CALIBRATION_MCP_m_p_t_f	1
RESULTS_SEARCH_16_PARAMETERS_AUTO_CALIBRATION_MCP_m_r_h_n_b	15
RESULTS_SEARCH_16_PARAMETERS_AUTO_CALIBRATION_MCP_m_z_n_s	99
RESULTS_SEARCH_16_PARAMETERS_AUTO_CALIBRATION_MCP_m_z_s_mn_f_r	0.0666667
RESULTS_SEARCH_16_PARAMETERS_AUTO_CALIBRATION_MCP_m_z_s_mx_f_r	0.1
RESULTS_SEARCH_16_PARAMETERS_MAX_PRECURSORS_FRAGLET	5
RESULTS_SEARCH_16_PARAMETERS_MAX_PRECURSORS_TAGLET	1
RESULTS_SEARCH_16_PARAMETERS_PRECURSORS_DR_FRAGLET	10
RESULTS_SEARCH_16_PARAMETERS_PRECURSORS_DR_TAGLET	3
RESULTS_SEARCH_16_PARAMETERS_DEFAULT_CHARGE_STATE_1_charge	2
RESULTS_SEARCH_16_PARAMETERS_DEFAULT_CHARGE_STATE_1_probability	1
RESULTS_SEARCH_16_PARAMETERS_DEFAULT_CHARGE_STATE_2_charge	3
RESULTS_SEARCH_16_PARAMETERS_DEFAULT_CHARGE_STATE_2_probability	1900-01-01
RESULTS_SEARCH_16_PARAMETERS_DEFAULT_CHARGE_STATE_3_charge	4
RESULTS_SEARCH_16_PARAMETERS_DEFAULT_CHARGE_STATE_3_probability	1
RESULTS_SEARCH_16_PARAMETERS_VERSION	5.0.1.0, 4895
RESULTS_SEARCH_16_PARAMETERS_PARAGON_VERSION	5.0.1.0, 4874
RESULTS_SEARCH_16_PARAMETERS_APPLICATION	ProteinPilot(tm) Software
RESULTS_SEARCH_16_PARAMETERS_PROGROUP_alternativedispositionmaximumfoldprobabilitydrop	100
RESULTS_SEARCH_16_PARAMETERS_PROGROUP_alternativedispositionmaximumfoldscoredrop	2
RESULTS_SEARCH_16_PARAMETERS_PROGROUP_autodiscordantpeptidethreshold	0.3
RESULTS_SEARCH_16_PARAMETERS_PROGROUP_bayesconfidencecalclulation	TRUE
RESULTS_SEARCH_16_PARAMETERS_PROGROUP_calibrateconfidence	TRUE
RESULTS_SEARCH_16_PARAMETERS_PROGROUP_compresspeptides	FALSE
RESULTS_SEARCH_16_PARAMETERS_PROGROUP_confidencepercentthresholdforexcludingothersfromquant	15
RESULTS_SEARCH_16_PARAMETERS_PROGROUP_confidencepercentthresholdforincludingselfinquant	15
RESULTS_SEARCH_16_PARAMETERS_PROGROUP_donotstoremspeaklists	FALSE
RESULTS_SEARCH_16_PARAMETERS_PROGROUP_fasta	C:\AB SCIEX\ProteinPilot Data\SearchDatabases\uniprot-zebrafish_with_Clover.fasta
RESULTS_SEARCH_16_PARAMETERS_PROGROUP_featuregroupminpepconf	0.66
RESULTS_SEARCH_16_PARAMETERS_PROGROUP_featuregroupminups	0.47
RESULTS_SEARCH_16_PARAMETERS_PROGROUP_focusingintersection	4
RESULTS_SEARCH_16_PARAMETERS_PROGROUP_focusingminimummatchconfidence	0.1
RESULTS_SEARCH_16_PARAMETERS_PROGROUP_focusingminunusedprotscore	0.1
RESULTS_SEARCH_16_PARAMETERS_PROGROUP_focusingsubsetcutoff	6
RESULTS_SEARCH_16_PARAMETERS_PROGROUP_intersection	1.3
RESULTS_SEARCH_16_PARAMETERS_PROGROUP_minimummatchconfidencecutoff	0.001
RESULTS_SEARCH_16_PARAMETERS_PROGROUP_minunusedprotscore	0.0458
RESULTS_SEARCH_16_PARAMETERS_PROGROUP_subsetcutoff	2
RESULTS_SEARCH_16_PARAMETERS_PROGROUP_unusedprotscorethresholdforexcludingothersfromquant	1.3
RESULTS_SEARCH_16_PARAMETERS_PEAKLIST_count	2382
RESULTS_SEARCH_16_PARAMETERS_PEAKLIST_filenumber	7
RESULTS_SEARCH_16_PARAMETERS_PEAKLIST_original_count	2382
RESULTS_SEARCH_16_PARAMETERS_PEAKLIST_originalfilename	C:\AB SCIEX\ProteinPilot Data\Results\Albert\ZX 20200624 6600\ZX 20200624 C4B 7.wiff
RESULTS_SEARCH_16_PARAMETERS_PEAKLIST_partnumber	8
RESULTS_SEARCH_16_PARAMETERS_QUANT_TYPE_background_correction	FALSE
RESULTS_SEARCH_16_PARAMETERS_QUANT_TYPE_bias_correction	TRUE
RESULTS_SEARCH_16_PARAMETERS_QUANT_TYPE_keep_extreme_peptides_over_fraction	0
RESULTS_SEARCH_16_PARAMETERS_QUANT_TYPE_low_confidence_check	TRUE
RESULTS_SEARCH_16_PARAMETERS_QUANT_TYPE_low_intensity_check	TRUE
RESULTS_SEARCH_16_PARAMETERS_QUANT_TYPE_median_statistic	TRUE
RESULTS_SEARCH_16_PARAMETERS_QUANT_TYPE_mod_check	TRUE
RESULTS_SEARCH_16_PARAMETERS_QUANT_TYPE_quant_threshold	-1
RESULTS_SEARCH_16_PARAMETERS_QUANT_TYPE_quant_threshold_sn	9
RESULTS_SEARCH_16_PARAMETERS_QUANT_TYPE_separate_searches	FALSE
RESULTS_SEARCH_16_PARAMETERS_QUANT_TYPE_shared_msms_check	TRUE
RESULTS_SEARCH_16_PARAMETERS_PARAGON_METHOD_SETTINGS_UI_SAMPLE_TYPE	Identification
RESULTS_SEARCH_16_PARAMETERS_PARAGON_METHOD_SETTINGS_UI_CYS_ALKYLATION	Iodoacetamide w other Cys mods possible
RESULTS_SEARCH_16_PARAMETERS_PARAGON_METHOD_SETTINGS_UI_DIGESTION	Trypsin + Lys C
RESULTS_SEARCH_16_PARAMETERS_PARAGON_METHOD_SETTINGS_UI_SPECIAL_FACTOR	Gel-based ID
RESULTS_SEARCH_16_PARAMETERS_PARAGON_METHOD_SETTINGS_UI_INSTRUMENT	TripleTOF 6600
RESULTS_SEARCH_16_PARAMETERS_PARAGON_METHOD_SETTINGS_UI_SEARCH_EFFORT	Thorough
RESULTS_SEARCH_16_PARAMETERS_PARAGON_METHOD_SETTINGS_UI_USER_NAME	IMB-MASS02\massuser
RESULTS_SEARCH_16_PARAMETERS_PARAGON_METHOD_SETTINGS_UI_MACHINE_NAME	IMB-MASS02
RESULTS_SEARCH_16_PARAMETERS_PARAGON_METHOD_SETTINGS_UI_SEARCH_ID	6.37467e+17
RESULTS_SEARCH_16_PARAMETERS_PARAGON_METHOD_SETTINGS_UI_START_TIME	2021-01-19 16:10:26
RESULTS_SEARCH_16_PARAMETERS_PARAGON_METHOD_SETTINGS_UI_MIN_UNUSED_PROTSCORE	0.0458
RESULTS_SEARCH_16_PARAMETERS_PARAGON_METHOD_SETTINGS_UI_PSPEP	TRUE
RESULTS_SEARCH_17_time_cpu	335994
RESULTS_SEARCH_17_time_duration	386567
RESULTS_SEARCH_17_version	5.0.1.4874
RESULTS_SEARCH_17_xml:id	SEARCH:1:637466694135747474_8
RESULTS_SEARCH_17_PARAMETERS_chemical_data_edited	FALSE
RESULTS_SEARCH_17_PARAMETERS_do_multiprecursor_search	TRUE
RESULTS_SEARCH_17_PARAMETERS_do_reverse_search	TRUE
RESULTS_SEARCH_17_PARAMETERS_max_quant_labels	35
RESULTS_SEARCH_17_PARAMETERS_maxresults	15
RESULTS_SEARCH_17_PARAMETERS_separate_searches	FALSE
RESULTS_SEARCH_17_PARAMETERS_MSTOLERANCE_type	dalton
RESULTS_SEARCH_17_PARAMETERS_MSTOLERANCE_value	0.05
RESULTS_SEARCH_17_PARAMETERS_MSMSTOLERANCE_type	dalton
RESULTS_SEARCH_17_PARAMETERS_MSMSTOLERANCE_value	0.1
RESULTS_SEARCH_17_PARAMETERS_MS_STANDARD_DEVIATION_type	dalton
RESULTS_SEARCH_17_PARAMETERS_MS_STANDARD_DEVIATION_value	0.0011
RESULTS_SEARCH_17_PARAMETERS_MSMS_STANDARD_DEVIATION_type	dalton
RESULTS_SEARCH_17_PARAMETERS_MSMS_STANDARD_DEVIATION_value	0.01
RESULTS_SEARCH_17_PARAMETERS_FASTA_filename	C:\AB SCIEX\ProteinPilot Data\SearchDatabases\uniprot-zebrafish_with_Clover.fasta
RESULTS_SEARCH_17_PARAMETERS_AUTO_CALIBRATION_ms	TRUE
RESULTS_SEARCH_17_PARAMETERS_AUTO_CALIBRATION_msexport	FALSE
RESULTS_SEARCH_17_PARAMETERS_AUTO_CALIBRATION_msms	TRUE
RESULTS_SEARCH_17_PARAMETERS_AUTO_CALIBRATION_msmstolsdratio	2.75
RESULTS_SEARCH_17_PARAMETERS_AUTO_CALIBRATION_mstolsdratio	7
RESULTS_SEARCH_17_PARAMETERS_AUTO_CALIBRATION_squareroot	TRUE
RESULTS_SEARCH_17_PARAMETERS_AUTO_CALIBRATION_type	dalton
RESULTS_SEARCH_17_PARAMETERS_AUTO_CALIBRATION_MCP_d_s_s_f	0.0666667
RESULTS_SEARCH_17_PARAMETERS_AUTO_CALIBRATION_MCP_d_s_w_f	3
RESULTS_SEARCH_17_PARAMETERS_AUTO_CALIBRATION_MCP_m_f_r_mbc	200
RESULTS_SEARCH_17_PARAMETERS_AUTO_CALIBRATION_MCP_m_m_c	10
RESULTS_SEARCH_17_PARAMETERS_AUTO_CALIBRATION_MCP_m_m_f_s	0.25
RESULTS_SEARCH_17_PARAMETERS_AUTO_CALIBRATION_MCP_m_m_p_f	0.33
RESULTS_SEARCH_17_PARAMETERS_AUTO_CALIBRATION_MCP_m_m_p_rms_f	1
RESULTS_SEARCH_17_PARAMETERS_AUTO_CALIBRATION_MCP_m_p_t_f	1
RESULTS_SEARCH_17_PARAMETERS_AUTO_CALIBRATION_MCP_m_r_h_n_b	15
RESULTS_SEARCH_17_PARAMETERS_AUTO_CALIBRATION_MCP_m_z_n_s	99
RESULTS_SEARCH_17_PARAMETERS_AUTO_CALIBRATION_MCP_m_z_s_mn_f_r	0.0666667
RESULTS_SEARCH_17_PARAMETERS_AUTO_CALIBRATION_MCP_m_z_s_mx_f_r	0.1
RESULTS_SEARCH_17_PARAMETERS_MAX_PRECURSORS_FRAGLET	5
RESULTS_SEARCH_17_PARAMETERS_MAX_PRECURSORS_TAGLET	1
RESULTS_SEARCH_17_PARAMETERS_PRECURSORS_DR_FRAGLET	10
RESULTS_SEARCH_17_PARAMETERS_PRECURSORS_DR_TAGLET	3
RESULTS_SEARCH_17_PARAMETERS_DEFAULT_CHARGE_STATE_1_charge	2
RESULTS_SEARCH_17_PARAMETERS_DEFAULT_CHARGE_STATE_1_probability	1
RESULTS_SEARCH_17_PARAMETERS_DEFAULT_CHARGE_STATE_2_charge	1900-01-03
RESULTS_SEARCH_17_PARAMETERS_DEFAULT_CHARGE_STATE_2_probability	1
RESULTS_SEARCH_17_PARAMETERS_DEFAULT_CHARGE_STATE_3_charge	4
RESULTS_SEARCH_17_PARAMETERS_DEFAULT_CHARGE_STATE_3_probability	1
RESULTS_SEARCH_17_PARAMETERS_VERSION	5.0.1.0, 4895
RESULTS_SEARCH_17_PARAMETERS_PARAGON_VERSION	5.0.1.0, 4874
RESULTS_SEARCH_17_PARAMETERS_APPLICATION	ProteinPilot(tm) Software
RESULTS_SEARCH_17_PARAMETERS_PROGROUP_alternativedispositionmaximumfoldprobabilitydrop	100
RESULTS_SEARCH_17_PARAMETERS_PROGROUP_alternativedispositionmaximumfoldscoredrop	2
RESULTS_SEARCH_17_PARAMETERS_PROGROUP_autodiscordantpeptidethreshold	0.3
RESULTS_SEARCH_17_PARAMETERS_PROGROUP_bayesconfidencecalclulation	TRUE
RESULTS_SEARCH_17_PARAMETERS_PROGROUP_calibrateconfidence	TRUE
RESULTS_SEARCH_17_PARAMETERS_PROGROUP_compresspeptides	FALSE
RESULTS_SEARCH_17_PARAMETERS_PROGROUP_confidencepercentthresholdforexcludingothersfromquant	15
RESULTS_SEARCH_17_PARAMETERS_PROGROUP_confidencepercentthresholdforincludingselfinquant	15
RESULTS_SEARCH_17_PARAMETERS_PROGROUP_donotstoremspeaklists	FALSE
RESULTS_SEARCH_17_PARAMETERS_PROGROUP_fasta	C:\AB SCIEX\ProteinPilot Data\SearchDatabases\uniprot-zebrafish_with_Clover.fasta
RESULTS_SEARCH_17_PARAMETERS_PROGROUP_featuregroupminpepconf	0.66
RESULTS_SEARCH_17_PARAMETERS_PROGROUP_featuregroupminups	0.47
RESULTS_SEARCH_17_PARAMETERS_PROGROUP_focusingintersection	4
RESULTS_SEARCH_17_PARAMETERS_PROGROUP_focusingminimummatchconfidence	0.1
RESULTS_SEARCH_17_PARAMETERS_PROGROUP_focusingminunusedprotscore	0.1
RESULTS_SEARCH_17_PARAMETERS_PROGROUP_focusingsubsetcutoff	6
RESULTS_SEARCH_17_PARAMETERS_PROGROUP_intersection	1.3
RESULTS_SEARCH_17_PARAMETERS_PROGROUP_minimummatchconfidencecutoff	0.001
RESULTS_SEARCH_17_PARAMETERS_PROGROUP_minunusedprotscore	0.0458
RESULTS_SEARCH_17_PARAMETERS_PROGROUP_subsetcutoff	2
RESULTS_SEARCH_17_PARAMETERS_PROGROUP_unusedprotscorethresholdforexcludingothersfromquant	1.3
RESULTS_SEARCH_17_PARAMETERS_PEAKLIST_count	2662
RESULTS_SEARCH_17_PARAMETERS_PEAKLIST_filenumber	8
RESULTS_SEARCH_17_PARAMETERS_PEAKLIST_original_count	1907-04-15
RESULTS_SEARCH_17_PARAMETERS_PEAKLIST_originalfilename	C:\AB SCIEX\ProteinPilot Data\Results\Albert\ZX 20200624 6600\ZX 20200624 C4B 8.wiff
RESULTS_SEARCH_17_PARAMETERS_PEAKLIST_partnumber	9
RESULTS_SEARCH_17_PARAMETERS_QUANT_TYPE_background_correction	FALSE
RESULTS_SEARCH_17_PARAMETERS_QUANT_TYPE_bias_correction	TRUE
RESULTS_SEARCH_17_PARAMETERS_QUANT_TYPE_keep_extreme_peptides_over_fraction	0
RESULTS_SEARCH_17_PARAMETERS_QUANT_TYPE_low_confidence_check	TRUE
RESULTS_SEARCH_17_PARAMETERS_QUANT_TYPE_low_intensity_check	TRUE
RESULTS_SEARCH_17_PARAMETERS_QUANT_TYPE_median_statistic	TRUE
RESULTS_SEARCH_17_PARAMETERS_QUANT_TYPE_mod_check	TRUE
RESULTS_SEARCH_17_PARAMETERS_QUANT_TYPE_quant_threshold	-1
RESULTS_SEARCH_17_PARAMETERS_QUANT_TYPE_quant_threshold_sn	1900-01-09
RESULTS_SEARCH_17_PARAMETERS_QUANT_TYPE_separate_searches	FALSE
RESULTS_SEARCH_17_PARAMETERS_QUANT_TYPE_shared_msms_check	TRUE
RESULTS_SEARCH_17_PARAMETERS_PARAGON_METHOD_SETTINGS_UI_SAMPLE_TYPE	Identification
RESULTS_SEARCH_17_PARAMETERS_PARAGON_METHOD_SETTINGS_UI_CYS_ALKYLATION	Iodoacetamide w other Cys mods possible
RESULTS_SEARCH_17_PARAMETERS_PARAGON_METHOD_SETTINGS_UI_DIGESTION	Trypsin + Lys C
RESULTS_SEARCH_17_PARAMETERS_PARAGON_METHOD_SETTINGS_UI_SPECIAL_FACTOR	Gel-based ID
RESULTS_SEARCH_17_PARAMETERS_PARAGON_METHOD_SETTINGS_UI_INSTRUMENT	TripleTOF 6600
RESULTS_SEARCH_17_PARAMETERS_PARAGON_METHOD_SETTINGS_UI_SEARCH_EFFORT	Thorough
RESULTS_SEARCH_17_PARAMETERS_PARAGON_METHOD_SETTINGS_UI_USER_NAME	IMB-MASS02\massuser
RESULTS_SEARCH_17_PARAMETERS_PARAGON_METHOD_SETTINGS_UI_MACHINE_NAME	IMB-MASS02
RESULTS_SEARCH_17_PARAMETERS_PARAGON_METHOD_SETTINGS_UI_SEARCH_ID	6.37467e+17
RESULTS_SEARCH_17_PARAMETERS_PARAGON_METHOD_SETTINGS_UI_START_TIME	2021-01-19 16:10:26
RESULTS_SEARCH_17_PARAMETERS_PARAGON_METHOD_SETTINGS_UI_MIN_UNUSED_PROTSCORE	0.0458
RESULTS_SEARCH_17_PARAMETERS_PARAGON_METHOD_SETTINGS_UI_PSPEP	TRUE
RESULTS_SEARCH_18_time_cpu	217153
RESULTS_SEARCH_18_time_duration	217285
RESULTS_SEARCH_18_version	5.0.1.4874
RESULTS_SEARCH_18_xml:id	SEARCH:2:637466694135747474_8
RESULTS_SEARCH_18_PARAMETERS_chemical_data_edited	FALSE
RESULTS_SEARCH_18_PARAMETERS_do_multiprecursor_search	TRUE
RESULTS_SEARCH_18_PARAMETERS_do_reverse_search	TRUE
RESULTS_SEARCH_18_PARAMETERS_max_quant_labels	35
RESULTS_SEARCH_18_PARAMETERS_maxresults	15
RESULTS_SEARCH_18_PARAMETERS_separate_searches	FALSE
RESULTS_SEARCH_18_PARAMETERS_MSTOLERANCE_type	dalton
RESULTS_SEARCH_18_PARAMETERS_MSTOLERANCE_value	0.05
RESULTS_SEARCH_18_PARAMETERS_MSMSTOLERANCE_type	dalton
RESULTS_SEARCH_18_PARAMETERS_MSMSTOLERANCE_value	0.1
RESULTS_SEARCH_18_PARAMETERS_MS_STANDARD_DEVIATION_type	dalton
RESULTS_SEARCH_18_PARAMETERS_MS_STANDARD_DEVIATION_value	0.0011
RESULTS_SEARCH_18_PARAMETERS_MSMS_STANDARD_DEVIATION_type	dalton
RESULTS_SEARCH_18_PARAMETERS_MSMS_STANDARD_DEVIATION_value	0.01
RESULTS_SEARCH_18_PARAMETERS_FASTA_filename	C:\AB SCIEX\ProteinPilot Data\SearchDatabases\uniprot-zebrafish_with_Clover.fasta
RESULTS_SEARCH_18_PARAMETERS_AUTO_CALIBRATION_ms	TRUE
RESULTS_SEARCH_18_PARAMETERS_AUTO_CALIBRATION_msexport	FALSE
RESULTS_SEARCH_18_PARAMETERS_AUTO_CALIBRATION_msms	TRUE
RESULTS_SEARCH_18_PARAMETERS_AUTO_CALIBRATION_msmstolsdratio	2.75
RESULTS_SEARCH_18_PARAMETERS_AUTO_CALIBRATION_mstolsdratio	7
RESULTS_SEARCH_18_PARAMETERS_AUTO_CALIBRATION_squareroot	TRUE
RESULTS_SEARCH_18_PARAMETERS_AUTO_CALIBRATION_type	dalton
RESULTS_SEARCH_18_PARAMETERS_AUTO_CALIBRATION_MCP_d_s_s_f	0.0666667
RESULTS_SEARCH_18_PARAMETERS_AUTO_CALIBRATION_MCP_d_s_w_f	3
RESULTS_SEARCH_18_PARAMETERS_AUTO_CALIBRATION_MCP_m_f_r_mbc	200
RESULTS_SEARCH_18_PARAMETERS_AUTO_CALIBRATION_MCP_m_m_c	10
RESULTS_SEARCH_18_PARAMETERS_AUTO_CALIBRATION_MCP_m_m_f_s	0.25
RESULTS_SEARCH_18_PARAMETERS_AUTO_CALIBRATION_MCP_m_m_p_f	0.33
RESULTS_SEARCH_18_PARAMETERS_AUTO_CALIBRATION_MCP_m_m_p_rms_f	1
RESULTS_SEARCH_18_PARAMETERS_AUTO_CALIBRATION_MCP_m_p_t_f	1
RESULTS_SEARCH_18_PARAMETERS_AUTO_CALIBRATION_MCP_m_r_h_n_b	15
RESULTS_SEARCH_18_PARAMETERS_AUTO_CALIBRATION_MCP_m_z_n_s	99
RESULTS_SEARCH_18_PARAMETERS_AUTO_CALIBRATION_MCP_m_z_s_mn_f_r	0.0666667
RESULTS_SEARCH_18_PARAMETERS_AUTO_CALIBRATION_MCP_m_z_s_mx_f_r	0.1
RESULTS_SEARCH_18_PARAMETERS_MAX_PRECURSORS_FRAGLET	5
RESULTS_SEARCH_18_PARAMETERS_MAX_PRECURSORS_TAGLET	1
RESULTS_SEARCH_18_PARAMETERS_PRECURSORS_DR_FRAGLET	10
RESULTS_SEARCH_18_PARAMETERS_PRECURSORS_DR_TAGLET	3
RESULTS_SEARCH_18_PARAMETERS_DEFAULT_CHARGE_STATE_1_charge	2
RESULTS_SEARCH_18_PARAMETERS_DEFAULT_CHARGE_STATE_1_probability	1
RESULTS_SEARCH_18_PARAMETERS_DEFAULT_CHARGE_STATE_2_charge	3
RESULTS_SEARCH_18_PARAMETERS_DEFAULT_CHARGE_STATE_2_probability	1
RESULTS_SEARCH_18_PARAMETERS_DEFAULT_CHARGE_STATE_3_charge	4
RESULTS_SEARCH_18_PARAMETERS_DEFAULT_CHARGE_STATE_3_probability	1
RESULTS_SEARCH_18_PARAMETERS_VERSION	5.0.1.0, 4895
RESULTS_SEARCH_18_PARAMETERS_PARAGON_VERSION	5.0.1.0, 4874
RESULTS_SEARCH_18_PARAMETERS_APPLICATION	ProteinPilot(tm) Software
RESULTS_SEARCH_18_PARAMETERS_PROGROUP_alternativedispositionmaximumfoldprobabilitydrop	100
RESULTS_SEARCH_18_PARAMETERS_PROGROUP_alternativedispositionmaximumfoldscoredrop	2
RESULTS_SEARCH_18_PARAMETERS_PROGROUP_autodiscordantpeptidethreshold	0.3
RESULTS_SEARCH_18_PARAMETERS_PROGROUP_bayesconfidencecalclulation	TRUE
RESULTS_SEARCH_18_PARAMETERS_PROGROUP_calibrateconfidence	TRUE
RESULTS_SEARCH_18_PARAMETERS_PROGROUP_compresspeptides	FALSE
RESULTS_SEARCH_18_PARAMETERS_PROGROUP_confidencepercentthresholdforexcludingothersfromquant	15
RESULTS_SEARCH_18_PARAMETERS_PROGROUP_confidencepercentthresholdforincludingselfinquant	15
RESULTS_SEARCH_18_PARAMETERS_PROGROUP_donotstoremspeaklists	FALSE
RESULTS_SEARCH_18_PARAMETERS_PROGROUP_fasta	C:\AB SCIEX\ProteinPilot Data\SearchDatabases\uniprot-zebrafish_with_Clover.fasta
RESULTS_SEARCH_18_PARAMETERS_PROGROUP_featuregroupminpepconf	15:50:24
RESULTS_SEARCH_18_PARAMETERS_PROGROUP_featuregroupminups	0.47
RESULTS_SEARCH_18_PARAMETERS_PROGROUP_focusingintersection	4
RESULTS_SEARCH_18_PARAMETERS_PROGROUP_focusingminimummatchconfidence	0.1
RESULTS_SEARCH_18_PARAMETERS_PROGROUP_focusingminunusedprotscore	0.1
RESULTS_SEARCH_18_PARAMETERS_PROGROUP_focusingsubsetcutoff	6
RESULTS_SEARCH_18_PARAMETERS_PROGROUP_intersection	1.3
RESULTS_SEARCH_18_PARAMETERS_PROGROUP_minimummatchconfidencecutoff	0.001
RESULTS_SEARCH_18_PARAMETERS_PROGROUP_minunusedprotscore	0.0458
RESULTS_SEARCH_18_PARAMETERS_PROGROUP_subsetcutoff	2
RESULTS_SEARCH_18_PARAMETERS_PROGROUP_unusedprotscorethresholdforexcludingothersfromquant	1.3
RESULTS_SEARCH_18_PARAMETERS_PEAKLIST_count	2662
RESULTS_SEARCH_18_PARAMETERS_PEAKLIST_filenumber	8
RESULTS_SEARCH_18_PARAMETERS_PEAKLIST_original_count	2662
RESULTS_SEARCH_18_PARAMETERS_PEAKLIST_originalfilename	C:\AB SCIEX\ProteinPilot Data\Results\Albert\ZX 20200624 6600\ZX 20200624 C4B 8.wiff
RESULTS_SEARCH_18_PARAMETERS_PEAKLIST_partnumber	9
RESULTS_SEARCH_18_PARAMETERS_QUANT_TYPE_background_correction	FALSE
RESULTS_SEARCH_18_PARAMETERS_QUANT_TYPE_bias_correction	TRUE
RESULTS_SEARCH_18_PARAMETERS_QUANT_TYPE_keep_extreme_peptides_over_fraction	0
RESULTS_SEARCH_18_PARAMETERS_QUANT_TYPE_low_confidence_check	TRUE
RESULTS_SEARCH_18_PARAMETERS_QUANT_TYPE_low_intensity_check	TRUE
RESULTS_SEARCH_18_PARAMETERS_QUANT_TYPE_median_statistic	TRUE
RESULTS_SEARCH_18_PARAMETERS_QUANT_TYPE_mod_check	TRUE
RESULTS_SEARCH_18_PARAMETERS_QUANT_TYPE_quant_threshold	-1
RESULTS_SEARCH_18_PARAMETERS_QUANT_TYPE_quant_threshold_sn	9
RESULTS_SEARCH_18_PARAMETERS_QUANT_TYPE_separate_searches	FALSE
RESULTS_SEARCH_18_PARAMETERS_QUANT_TYPE_shared_msms_check	TRUE
RESULTS_SEARCH_18_PARAMETERS_PARAGON_METHOD_SETTINGS_UI_SAMPLE_TYPE	Identification
RESULTS_SEARCH_18_PARAMETERS_PARAGON_METHOD_SETTINGS_UI_CYS_ALKYLATION	Iodoacetamide w other Cys mods possible
RESULTS_SEARCH_18_PARAMETERS_PARAGON_METHOD_SETTINGS_UI_DIGESTION	Trypsin + Lys C
RESULTS_SEARCH_18_PARAMETERS_PARAGON_METHOD_SETTINGS_UI_SPECIAL_FACTOR	Gel-based ID
RESULTS_SEARCH_18_PARAMETERS_PARAGON_METHOD_SETTINGS_UI_INSTRUMENT	TripleTOF 6600
RESULTS_SEARCH_18_PARAMETERS_PARAGON_METHOD_SETTINGS_UI_SEARCH_EFFORT	Thorough
RESULTS_SEARCH_18_PARAMETERS_PARAGON_METHOD_SETTINGS_UI_USER_NAME	IMB-MASS02\massuser
RESULTS_SEARCH_18_PARAMETERS_PARAGON_METHOD_SETTINGS_UI_MACHINE_NAME	IMB-MASS02
RESULTS_SEARCH_18_PARAMETERS_PARAGON_METHOD_SETTINGS_UI_SEARCH_ID	6.37467e+17
RESULTS_SEARCH_18_PARAMETERS_PARAGON_METHOD_SETTINGS_UI_START_TIME	2021-01-19 16:10:26
RESULTS_SEARCH_18_PARAMETERS_PARAGON_METHOD_SETTINGS_UI_MIN_UNUSED_PROTSCORE	0.0458
RESULTS_SEARCH_18_PARAMETERS_PARAGON_METHOD_SETTINGS_UI_PSPEP	TRUE
RESULTS_SEARCH_19_time_cpu	39577
RESULTS_SEARCH_19_time_duration	39625
RESULTS_SEARCH_19_version	5.0.1.4874
RESULTS_SEARCH_19_xml:id	SEARCH:1:637466694135747474_9
RESULTS_SEARCH_19_PARAMETERS_chemical_data_edited	FALSE
RESULTS_SEARCH_19_PARAMETERS_do_multiprecursor_search	TRUE
RESULTS_SEARCH_19_PARAMETERS_do_reverse_search	TRUE
RESULTS_SEARCH_19_PARAMETERS_max_quant_labels	35
RESULTS_SEARCH_19_PARAMETERS_maxresults	15
RESULTS_SEARCH_19_PARAMETERS_separate_searches	FALSE
RESULTS_SEARCH_19_PARAMETERS_MSTOLERANCE_type	dalton
RESULTS_SEARCH_19_PARAMETERS_MSTOLERANCE_value	0.05
RESULTS_SEARCH_19_PARAMETERS_MSMSTOLERANCE_type	dalton
RESULTS_SEARCH_19_PARAMETERS_MSMSTOLERANCE_value	0.1
RESULTS_SEARCH_19_PARAMETERS_MS_STANDARD_DEVIATION_type	dalton
RESULTS_SEARCH_19_PARAMETERS_MS_STANDARD_DEVIATION_value	0.0011
RESULTS_SEARCH_19_PARAMETERS_MSMS_STANDARD_DEVIATION_type	dalton
RESULTS_SEARCH_19_PARAMETERS_MSMS_STANDARD_DEVIATION_value	0.01
RESULTS_SEARCH_19_PARAMETERS_FASTA_filename	C:\AB SCIEX\ProteinPilot Data\SearchDatabases\uniprot-zebrafish_with_Clover.fasta
RESULTS_SEARCH_19_PARAMETERS_AUTO_CALIBRATION_ms	TRUE
RESULTS_SEARCH_19_PARAMETERS_AUTO_CALIBRATION_msexport	FALSE
RESULTS_SEARCH_19_PARAMETERS_AUTO_CALIBRATION_msms	TRUE
RESULTS_SEARCH_19_PARAMETERS_AUTO_CALIBRATION_msmstolsdratio	2.75
RESULTS_SEARCH_19_PARAMETERS_AUTO_CALIBRATION_mstolsdratio	7
RESULTS_SEARCH_19_PARAMETERS_AUTO_CALIBRATION_squareroot	TRUE
RESULTS_SEARCH_19_PARAMETERS_AUTO_CALIBRATION_type	dalton
RESULTS_SEARCH_19_PARAMETERS_AUTO_CALIBRATION_MCP_d_s_s_f	0.0666667
RESULTS_SEARCH_19_PARAMETERS_AUTO_CALIBRATION_MCP_d_s_w_f	3
RESULTS_SEARCH_19_PARAMETERS_AUTO_CALIBRATION_MCP_m_f_r_mbc	200
RESULTS_SEARCH_19_PARAMETERS_AUTO_CALIBRATION_MCP_m_m_c	10
RESULTS_SEARCH_19_PARAMETERS_AUTO_CALIBRATION_MCP_m_m_f_s	0.25
RESULTS_SEARCH_19_PARAMETERS_AUTO_CALIBRATION_MCP_m_m_p_f	0.33
RESULTS_SEARCH_19_PARAMETERS_AUTO_CALIBRATION_MCP_m_m_p_rms_f	1
RESULTS_SEARCH_19_PARAMETERS_AUTO_CALIBRATION_MCP_m_p_t_f	1
RESULTS_SEARCH_19_PARAMETERS_AUTO_CALIBRATION_MCP_m_r_h_n_b	15
RESULTS_SEARCH_19_PARAMETERS_AUTO_CALIBRATION_MCP_m_z_n_s	99
RESULTS_SEARCH_19_PARAMETERS_AUTO_CALIBRATION_MCP_m_z_s_mn_f_r	0.0666667
RESULTS_SEARCH_19_PARAMETERS_AUTO_CALIBRATION_MCP_m_z_s_mx_f_r	0.1
RESULTS_SEARCH_19_PARAMETERS_MS_AUTO_CALIBRATION_OUT_avres	9.08739e-08
RESULTS_SEARCH_19_PARAMETERS_MS_AUTO_CALIBRATION_OUT_c0	0.00410434
RESULTS_SEARCH_19_PARAMETERS_MS_AUTO_CALIBRATION_OUT_c1minus1	-0.000168075
RESULTS_SEARCH_19_PARAMETERS_MS_AUTO_CALIBRATION_OUT_c2	0
RESULTS_SEARCH_19_PARAMETERS_MS_AUTO_CALIBRATION_OUT_file	9
RESULTS_SEARCH_19_PARAMETERS_MS_AUTO_CALIBRATION_OUT_partnumber	10
RESULTS_SEARCH_19_PARAMETERS_MS_AUTO_CALIBRATION_OUT_polyorder	1
RESULTS_SEARCH_19_PARAMETERS_MS_AUTO_CALIBRATION_OUT_sample	1
RESULTS_SEARCH_19_PARAMETERS_MS_AUTO_CALIBRATION_OUT_squareroot	TRUE
RESULTS_SEARCH_19_PARAMETERS_MSMS_AUTO_CALIBRATION_OUT_avres	-8.4594e-07
RESULTS_SEARCH_19_PARAMETERS_MSMS_AUTO_CALIBRATION_OUT_c0	-0.000959756
RESULTS_SEARCH_19_PARAMETERS_MSMS_AUTO_CALIBRATION_OUT_c1minus1	4.05998e-05
RESULTS_SEARCH_19_PARAMETERS_MSMS_AUTO_CALIBRATION_OUT_c2	0
RESULTS_SEARCH_19_PARAMETERS_MSMS_AUTO_CALIBRATION_OUT_file	9
[truncated: 7,040 more rows]

## Sheet: Metadata Calculations
	Subsearch	Search string	present		File index down	Part number	Spectra - 'original'	Spectra 'count' - non-empty?	max original Spectra for part	Max non-empty spectra for part	File Index for first only
	1	RESULTS_SEARCH_1_PARAMETERS_PEAKLIST_rawdatafilename		C:\AB SCIEX\ProteinPilot Data\Results\Albert\ZX 20200624 6600\ZX 20200624 C4B 1.wiff	1	1	3997	3997	3997	3997	1
	2	RESULTS_SEARCH_2_PARAMETERS_PEAKLIST_rawdatafilename		C:\AB SCIEX\ProteinPilot Data\Results\Albert\ZX 20200624 6600\ZX 20200624 C4B 1.wiff	1	1	3997	3997
	3	RESULTS_SEARCH_3_PARAMETERS_PEAKLIST_rawdatafilename		C:\AB SCIEX\ProteinPilot Data\Results\Albert\ZX 20200624 6600\ZX 20200624 C4B 2.wiff	2	2	2698	2698	2698	2698	2
1 if Rapid, 2 if Thor	4	RESULTS_SEARCH_4_PARAMETERS_PEAKLIST_rawdatafilename		C:\AB SCIEX\ProteinPilot Data\Results\Albert\ZX 20200624 6600\ZX 20200624 C4B 2.wiff	2	2	2698	2698
2	5	RESULTS_SEARCH_5_PARAMETERS_PEAKLIST_rawdatafilename		C:\AB SCIEX\ProteinPilot Data\Results\Albert\ZX 20200624 6600\ZX 20200624 C4B 3.wiff	3	3	2598	2598	2598	2598	3
	6	RESULTS_SEARCH_6_PARAMETERS_PEAKLIST_rawdatafilename		C:\AB SCIEX\ProteinPilot Data\Results\Albert\ZX 20200624 6600\ZX 20200624 C4B 3.wiff	3	3	2598	2598
# Segments	7	RESULTS_SEARCH_7_PARAMETERS_PEAKLIST_rawdatafilename		C:\AB SCIEX\ProteinPilot Data\Results\Albert\ZX 20200624 6600\ZX 20200624 C4B 4.wiff	4	4	2007	2007	2007	2007	4
88	8	RESULTS_SEARCH_8_PARAMETERS_PEAKLIST_rawdatafilename		C:\AB SCIEX\ProteinPilot Data\Results\Albert\ZX 20200624 6600\ZX 20200624 C4B 4.wiff	4	4	2007	2007
(max is 1000 segments)	9	RESULTS_SEARCH_9_PARAMETERS_PEAKLIST_rawdatafilename		C:\AB SCIEX\ProteinPilot Data\Results\Albert\ZX 20200624 6600\ZX 20200624 C4B 5.wiff	5	5	2251	2251	2251	2251	5
	10	RESULTS_SEARCH_10_PARAMETERS_PEAKLIST_rawdatafilename		C:\AB SCIEX\ProteinPilot Data\Results\Albert\ZX 20200624 6600\ZX 20200624 C4B 5.wiff	5	5	2251	2251
	11	RESULTS_SEARCH_11_PARAMETERS_PEAKLIST_rawdatafilename		C:\AB SCIEX\ProteinPilot Data\Results\Albert\ZX 20200624 6600\ZX 20200624 C4B 5.wiff	5	6	2247	2247	2247	2247
	12	RESULTS_SEARCH_12_PARAMETERS_PEAKLIST_rawdatafilename		C:\AB SCIEX\ProteinPilot Data\Results\Albert\ZX 20200624 6600\ZX 20200624 C4B 5.wiff	5	6	2247	2247
	13	RESULTS_SEARCH_13_PARAMETERS_PEAKLIST_rawdatafilename		C:\AB SCIEX\ProteinPilot Data\Results\Albert\ZX 20200624 6600\ZX 20200624 C4B 6.wiff	6	7	2655	2655	2655	2655	6
	14	RESULTS_SEARCH_14_PARAMETERS_PEAKLIST_rawdatafilename		C:\AB SCIEX\ProteinPilot Data\Results\Albert\ZX 20200624 6600\ZX 20200624 C4B 6.wiff	6	7	2655	2655
	15	RESULTS_SEARCH_15_PARAMETERS_PEAKLIST_rawdatafilename		C:\AB SCIEX\ProteinPilot Data\Results\Albert\ZX 20200624 6600\ZX 20200624 C4B 7.wiff	7	8	2382	2382	2382	2382	7
	16	RESULTS_SEARCH_16_PARAMETERS_PEAKLIST_rawdatafilename		C:\AB SCIEX\ProteinPilot Data\Results\Albert\ZX 20200624 6600\ZX 20200624 C4B 7.wiff	7	8	2382	2382
	17	RESULTS_SEARCH_17_PARAMETERS_PEAKLIST_rawdatafilename		C:\AB SCIEX\ProteinPilot Data\Results\Albert\ZX 20200624 6600\ZX 20200624 C4B 8.wiff	8	9	2662	2662	2662	2662	8
	18	RESULTS_SEARCH_18_PARAMETERS_PEAKLIST_rawdatafilename		C:\AB SCIEX\ProteinPilot Data\Results\Albert\ZX 20200624 6600\ZX 20200624 C4B 8.wiff	8	9	2662	2662
	19	RESULTS_SEARCH_19_PARAMETERS_PEAKLIST_rawdatafilename		C:\AB SCIEX\ProteinPilot Data\Results\Albert\ZX 20200624 6600\ZX 20200624 C4B 9.wiff	9	10	2192	2192	2192	2192	9
	20	RESULTS_SEARCH_20_PARAMETERS_PEAKLIST_rawdatafilename		C:\AB SCIEX\ProteinPilot Data\Results\Albert\ZX 20200624 6600\ZX 20200624 C4B 9.wiff	9	10	2192	2192
	21	RESULTS_SEARCH_21_PARAMETERS_PEAKLIST_rawdatafilename		C:\AB SCIEX\ProteinPilot Data\Results\Albert\ZX 20200624 6600\ZX 20200624 C4B 10.wiff	10	11	2795	2795	2795	2795	10
	22	RESULTS_SEARCH_22_PARAMETERS_PEAKLIST_rawdatafilename		C:\AB SCIEX\ProteinPilot Data\Results\Albert\ZX 20200624 6600\ZX 20200624 C4B 10.wiff	10	11	2795	2795
	23	RESULTS_SEARCH_23_PARAMETERS_PEAKLIST_rawdatafilename		C:\AB SCIEX\ProteinPilot Data\Results\Albert\ZX 20200624 6600\ZX 20200624 C4B 11.wiff	11	12	3440	3440	3440	3440	11
	24	RESULTS_SEARCH_24_PARAMETERS_PEAKLIST_rawdatafilename		C:\AB SCIEX\ProteinPilot Data\Results\Albert\ZX 20200624 6600\ZX 20200624 C4B 11.wiff	11	12	3440	3440
	25	RESULTS_SEARCH_25_PARAMETERS_PEAKLIST_rawdatafilename		C:\AB SCIEX\ProteinPilot Data\Results\Albert\ZX 20200819 6600\ZX 20200819 6600 C4B 1.wiff	12	13	3654	3654	3654	3654	12
	26	RESULTS_SEARCH_26_PARAMETERS_PEAKLIST_rawdatafilename		C:\AB SCIEX\ProteinPilot Data\Results\Albert\ZX 20200819 6600\ZX 20200819 6600 C4B 1.wiff	12	13	3654	3654
	27	RESULTS_SEARCH_27_PARAMETERS_PEAKLIST_rawdatafilename		C:\AB SCIEX\ProteinPilot Data\Results\Albert\ZX 20200819 6600\ZX 20200819 6600 C4B 1.wiff	12	14	3654	3654	3654	3654
	28	RESULTS_SEARCH_28_PARAMETERS_PEAKLIST_rawdatafilename		C:\AB SCIEX\ProteinPilot Data\Results\Albert\ZX 20200819 6600\ZX 20200819 6600 C4B 1.wiff	12	14	3654	3654
	29	RESULTS_SEARCH_29_PARAMETERS_PEAKLIST_rawdatafilename		C:\AB SCIEX\ProteinPilot Data\Results\Albert\ZX 20200819 6600\ZX 20200819 6600 C4B 1.wiff	12	15	3660	3660	3660	3660
	30	RESULTS_SEARCH_30_PARAMETERS_PEAKLIST_rawdatafilename		C:\AB SCIEX\ProteinPilot Data\Results\Albert\ZX 20200819 6600\ZX 20200819 6600 C4B 1.wiff	12	15	3660	3660
	31	RESULTS_SEARCH_31_PARAMETERS_PEAKLIST_rawdatafilename		C:\AB SCIEX\ProteinPilot Data\Results\Albert\ZX 20200819 6600\ZX 20200819 6600 C4B 1.wiff	12	16	3641	3641	3641	3641
	32	RESULTS_SEARCH_32_PARAMETERS_PEAKLIST_rawdatafilename		C:\AB SCIEX\ProteinPilot Data\Results\Albert\ZX 20200819 6600\ZX 20200819 6600 C4B 1.wiff	12	16	3641	3641
	33	RESULTS_SEARCH_33_PARAMETERS_PEAKLIST_rawdatafilename		C:\AB SCIEX\ProteinPilot Data\Results\Albert\ZX 20200819 6600\ZX 20200819 6600 C4B 2.wiff	13	17	2772	2772	2772	2772	13
	34	RESULTS_SEARCH_34_PARAMETERS_PEAKLIST_rawdatafilename		C:\AB SCIEX\ProteinPilot Data\Results\Albert\ZX 20200819 6600\ZX 20200819 6600 C4B 2.wiff	13	17	2772	2772
	35	RESULTS_SEARCH_35_PARAMETERS_PEAKLIST_rawdatafilename		C:\AB SCIEX\ProteinPilot Data\Results\Albert\ZX 20200819 6600\ZX 20200819 6600 C4B 2.wiff	13	18	2773	2773	2773	2773
	36	RESULTS_SEARCH_36_PARAMETERS_PEAKLIST_rawdatafilename		C:\AB SCIEX\ProteinPilot Data\Results\Albert\ZX 20200819 6600\ZX 20200819 6600 C4B 2.wiff	13	18	2773	2773
	37	RESULTS_SEARCH_37_PARAMETERS_PEAKLIST_rawdatafilename		C:\AB SCIEX\ProteinPilot Data\Results\Albert\ZX 20200819 6600\ZX 20200819 6600 C4B 2.wiff	13	19	2771	2771	2771	2771
	38	RESULTS_SEARCH_38_PARAMETERS_PEAKLIST_rawdatafilename		C:\AB SCIEX\ProteinPilot Data\Results\Albert\ZX 20200819 6600\ZX 20200819 6600 C4B 2.wiff	13	19	2771	2771
	39	RESULTS_SEARCH_39_PARAMETERS_PEAKLIST_rawdatafilename		C:\AB SCIEX\ProteinPilot Data\Results\Albert\ZX 20200819 6600\ZX 20200819 6600 C4B 3.wiff	14	20	3108	3108	3108	3108	14
	40	RESULTS_SEARCH_40_PARAMETERS_PEAKLIST_rawdatafilename		C:\AB SCIEX\ProteinPilot Data\Results\Albert\ZX 20200819 6600\ZX 20200819 6600 C4B 3.wiff	14	20	3108	3108
	41	RESULTS_SEARCH_41_PARAMETERS_PEAKLIST_rawdatafilename		C:\AB SCIEX\ProteinPilot Data\Results\Albert\ZX 20200819 6600\ZX 20200819 6600 C4B 3.wiff	14	21	3104	3104	3104	3104
	42	RESULTS_SEARCH_42_PARAMETERS_PEAKLIST_rawdatafilename		C:\AB SCIEX\ProteinPilot Data\Results\Albert\ZX 20200819 6600\ZX 20200819 6600 C4B 3.wiff	14	21	3104	3104
	43	RESULTS_SEARCH_43_PARAMETERS_PEAKLIST_rawdatafilename		C:\AB SCIEX\ProteinPilot Data\Results\Albert\ZX 20200819 6600\ZX 20200819 6600 C4B 3.wiff	14	22	3105	3105	3105	3105
	44	RESULTS_SEARCH_44_PARAMETERS_PEAKLIST_rawdatafilename		C:\AB SCIEX\ProteinPilot Data\Results\Albert\ZX 20200819 6600\ZX 20200819 6600 C4B 3.wiff	14	22	3105	3105
	45	RESULTS_SEARCH_45_PARAMETERS_PEAKLIST_rawdatafilename		C:\AB SCIEX\ProteinPilot Data\Results\Albert\ZX 20200819 6600\ZX 20200819 6600 C4B 4.wiff	15	23	3135	3134	3135	3134	15
	46	RESULTS_SEARCH_46_PARAMETERS_PEAKLIST_rawdatafilename		C:\AB SCIEX\ProteinPilot Data\Results\Albert\ZX 20200819 6600\ZX 20200819 6600 C4B 4.wiff	15	23	3135	3134
	47	RESULTS_SEARCH_47_PARAMETERS_PEAKLIST_rawdatafilename		C:\AB SCIEX\ProteinPilot Data\Results\Albert\ZX 20200819 6600\ZX 20200819 6600 C4B 4.wiff	15	24	3134	3134	3134	3134
	48	RESULTS_SEARCH_48_PARAMETERS_PEAKLIST_rawdatafilename		C:\AB SCIEX\ProteinPilot Data\Results\Albert\ZX 20200819 6600\ZX 20200819 6600 C4B 4.wiff	15	24	3134	3134
	49	RESULTS_SEARCH_49_PARAMETERS_PEAKLIST_rawdatafilename		C:\AB SCIEX\ProteinPilot Data\Results\Albert\ZX 20200819 6600\ZX 20200819 6600 C4B 5.wiff	16	25	3080	3080	3080	3080	16
	50	RESULTS_SEARCH_50_PARAMETERS_PEAKLIST_rawdatafilename		C:\AB SCIEX\ProteinPilot Data\Results\Albert\ZX 20200819 6600\ZX 20200819 6600 C4B 5.wiff	16	25	3080	3080
	51	RESULTS_SEARCH_51_PARAMETERS_PEAKLIST_rawdatafilename		C:\AB SCIEX\ProteinPilot Data\Results\Albert\ZX 20200819 6600\ZX 20200819 6600 C4B 5.wiff	16	26	3079	3079	3079	3079
	52	RESULTS_SEARCH_52_PARAMETERS_PEAKLIST_rawdatafilename		C:\AB SCIEX\ProteinPilot Data\Results\Albert\ZX 20200819 6600\ZX 20200819 6600 C4B 5.wiff	16	26	3079	3079
	53	RESULTS_SEARCH_53_PARAMETERS_PEAKLIST_rawdatafilename		C:\AB SCIEX\ProteinPilot Data\Results\Albert\ZX 20200819 6600\ZX 20200819 6600 C4B 6.wiff	17	27	2694	2694	2694	2694	17
	54	RESULTS_SEARCH_54_PARAMETERS_PEAKLIST_rawdatafilename		C:\AB SCIEX\ProteinPilot Data\Results\Albert\ZX 20200819 6600\ZX 20200819 6600 C4B 6.wiff	17	27	2694	2694
	55	RESULTS_SEARCH_55_PARAMETERS_PEAKLIST_rawdatafilename		C:\AB SCIEX\ProteinPilot Data\Results\Albert\ZX 20200819 6600\ZX 20200819 6600 C4B 6.wiff	17	28	2691	2690	2691	2690
	56	RESULTS_SEARCH_56_PARAMETERS_PEAKLIST_rawdatafilename		C:\AB SCIEX\ProteinPilot Data\Results\Albert\ZX 20200819 6600\ZX 20200819 6600 C4B 6.wiff	17	28	2691	2690
	57	RESULTS_SEARCH_57_PARAMETERS_PEAKLIST_rawdatafilename		C:\AB SCIEX\ProteinPilot Data\Results\Albert\ZX 20200819 6600\ZX 20200819 6600 C4B 7.wiff	18	29	2215	2214	2215	2214	18
	58	RESULTS_SEARCH_58_PARAMETERS_PEAKLIST_rawdatafilename		C:\AB SCIEX\ProteinPilot Data\Results\Albert\ZX 20200819 6600\ZX 20200819 6600 C4B 7.wiff	18	29	2215	2214
	59	RESULTS_SEARCH_59_PARAMETERS_PEAKLIST_rawdatafilename		C:\AB SCIEX\ProteinPilot Data\Results\Albert\ZX 20200819 6600\ZX 20200819 6600 C4B 7.wiff	18	30	2214	2214	2214	2214
	60	RESULTS_SEARCH_60_PARAMETERS_PEAKLIST_rawdatafilename		C:\AB SCIEX\ProteinPilot Data\Results\Albert\ZX 20200819 6600\ZX 20200819 6600 C4B 7.wiff	18	30	2214	2214
	61	RESULTS_SEARCH_61_PARAMETERS_PEAKLIST_rawdatafilename		C:\AB SCIEX\ProteinPilot Data\Results\Albert\ZX 20200819 6600\ZX 20200819 6600 C4B 8.wiff	19	31	3654	3654	3654	3654	19
	62	RESULTS_SEARCH_62_PARAMETERS_PEAKLIST_rawdatafilename		C:\AB SCIEX\ProteinPilot Data\Results\Albert\ZX 20200819 6600\ZX 20200819 6600 C4B 8.wiff	19	31	3654	3654
	63	RESULTS_SEARCH_63_PARAMETERS_PEAKLIST_rawdatafilename		C:\AB SCIEX\ProteinPilot Data\Results\Albert\ZX 20200819 6600\ZX 20200819 6600 C4B 9.wiff	20	32	3701	3700	3701	3700	20
	64	RESULTS_SEARCH_64_PARAMETERS_PEAKLIST_rawdatafilename		C:\AB SCIEX\ProteinPilot Data\Results\Albert\ZX 20200819 6600\ZX 20200819 6600 C4B 9.wiff	20	32	3701	3700
	65	RESULTS_SEARCH_65_PARAMETERS_PEAKLIST_rawdatafilename		C:\AB SCIEX\ProteinPilot Data\Results\Albert\ZX 20200819 6600\ZX 20200819 6600 C4B 10.wiff	21	33	2575	2575	2575	2575	21
	66	RESULTS_SEARCH_66_PARAMETERS_PEAKLIST_rawdatafilename		C:\AB SCIEX\ProteinPilot Data\Results\Albert\ZX 20200819 6600\ZX 20200819 6600 C4B 10.wiff	21	33	2575	2575
	67	RESULTS_SEARCH_67_PARAMETERS_PEAKLIST_rawdatafilename		C:\AB SCIEX\ProteinPilot Data\Results\Albert\ZX 20200819 6600\ZX 20200819 6600 C4B 10.wiff	21	34	2572	2571	2572	2571
	68	RESULTS_SEARCH_68_PARAMETERS_PEAKLIST_rawdatafilename		C:\AB SCIEX\ProteinPilot Data\Results\Albert\ZX 20200819 6600\ZX 20200819 6600 C4B 10.wiff	21	34	2572	2571
	69	RESULTS_SEARCH_69_PARAMETERS_PEAKLIST_rawdatafilename		C:\AB SCIEX\ProteinPilot Data\Results\Albert\ZX 20200819 6600\ZX 20200819 6600 C4B 11.wiff	22	35	2525	2525	2525	2525	22
	70	RESULTS_SEARCH_70_PARAMETERS_PEAKLIST_rawdatafilename		C:\AB SCIEX\ProteinPilot Data\Results\Albert\ZX 20200819 6600\ZX 20200819 6600 C4B 11.wiff	22	35	2525	2525
	71	RESULTS_SEARCH_71_PARAMETERS_PEAKLIST_rawdatafilename		C:\AB SCIEX\ProteinPilot Data\Results\Albert\ZX 20200819 6600\ZX 20200819 6600 C4B 11.wiff	22	36	2524	2524	2524	2524
	72	RESULTS_SEARCH_72_PARAMETERS_PEAKLIST_rawdatafilename		C:\AB SCIEX\ProteinPilot Data\Results\Albert\ZX 20200819 6600\ZX 20200819 6600 C4B 11.wiff	22	36	2524	2524
	73	RESULTS_SEARCH_73_PARAMETERS_PEAKLIST_rawdatafilename		C:\AB SCIEX\ProteinPilot Data\Results\Albert\ZX 20200819 6600\ZX 20200819 6600 C4B 12.wiff	23	37	2345	2345	2345	2345	23
	74	RESULTS_SEARCH_74_PARAMETERS_PEAKLIST_rawdatafilename		C:\AB SCIEX\ProteinPilot Data\Results\Albert\ZX 20200819 6600\ZX 20200819 6600 C4B 12.wiff	23	37	2345	2345
	75	RESULTS_SEARCH_75_PARAMETERS_PEAKLIST_rawdatafilename		C:\AB SCIEX\ProteinPilot Data\Results\Albert\ZX 20200819 6600\ZX 20200819 6600 C4B 12.wiff	23	38	2344	2344	2344	2344
	76	RESULTS_SEARCH_76_PARAMETERS_PEAKLIST_rawdatafilename		C:\AB SCIEX\ProteinPilot Data\Results\Albert\ZX 20200819 6600\ZX 20200819 6600 C4B 12.wiff	23	38	2344	2344
	77	RESULTS_SEARCH_77_PARAMETERS_PEAKLIST_rawdatafilename		C:\AB SCIEX\ProteinPilot Data\Results\Albert\ZX 20200819 6600\ZX 20200819 6600 C4B 13.wiff	24	39	2542	2541	2542	2541	24
	78	RESULTS_SEARCH_78_PARAMETERS_PEAKLIST_rawdatafilename		C:\AB SCIEX\ProteinPilot Data\Results\Albert\ZX 20200819 6600\ZX 20200819 6600 C4B 13.wiff	24	39	2542	2541
	79	RESULTS_SEARCH_79_PARAMETERS_PEAKLIST_rawdatafilename		C:\AB SCIEX\ProteinPilot Data\Results\Albert\ZX 20200819 6600\ZX 20200819 6600 C4B 13.wiff	24	40	2540	2539	2540	2539
	80	RESULTS_SEARCH_80_PARAMETERS_PEAKLIST_rawdatafilename		C:\AB SCIEX\ProteinPilot Data\Results\Albert\ZX 20200819 6600\ZX 20200819 6600 C4B 13.wiff	24	40	2540	2539
	81	RESULTS_SEARCH_81_PARAMETERS_PEAKLIST_rawdatafilename		C:\AB SCIEX\ProteinPilot Data\Results\Albert\ZX 20200819 6600\ZX 20200819 6600 C4B 14.wiff	25	41	2095	2095	2095	2095	25
	82	RESULTS_SEARCH_82_PARAMETERS_PEAKLIST_rawdatafilename		C:\AB SCIEX\ProteinPilot Data\Results\Albert\ZX 20200819 6600\ZX 20200819 6600 C4B 14.wiff	25	41	2095	2095
	83	RESULTS_SEARCH_83_PARAMETERS_PEAKLIST_rawdatafilename		C:\AB SCIEX\ProteinPilot Data\Results\Albert\ZX 20200819 6600\ZX 20200819 6600 C4B 14.wiff	25	42	2095	2093	2095	2093
	84	RESULTS_SEARCH_84_PARAMETERS_PEAKLIST_rawdatafilename		C:\AB SCIEX\ProteinPilot Data\Results\Albert\ZX 20200819 6600\ZX 20200819 6600 C4B 14.wiff	25	42	2095	2093
	85	RESULTS_SEARCH_85_PARAMETERS_PEAKLIST_rawdatafilename		C:\AB SCIEX\ProteinPilot Data\Results\Albert\ZX 20200819 6600\ZX 20200819 6600 C4B 15.wiff	26	43	2661	2661	2661	2661	26
	86	RESULTS_SEARCH_86_PARAMETERS_PEAKLIST_rawdatafilename		C:\AB SCIEX\ProteinPilot Data\Results\Albert\ZX 20200819 6600\ZX 20200819 6600 C4B 15.wiff	26	43	2661	2661
	87	RESULTS_SEARCH_87_PARAMETERS_PEAKLIST_rawdatafilename		C:\AB SCIEX\ProteinPilot Data\Results\Albert\ZX 20200819 6600\ZX 20200819 6600 C4B 15.wiff	26	44	2661	2661	2661	2661
	88	RESULTS_SEARCH_88_PARAMETERS_PEAKLIST_rawdatafilename		C:\AB SCIEX\ProteinPilot Data\Results\Albert\ZX 20200819 6600\ZX 20200819 6600 C4B 15.wiff	26	44	2661	2661

## Sheet: Curated Metadata
Group file metadata term	Metadata Description (of raw extracted item)	Use Partial Match	Term in Stream	Derived (Calculated)	Value	Validation check/comments	Conversion type, if done	Conversion factor		Metadata Category	Metadata Description of Final Metadata Item (converted manually, if applicable)	Value
	Group filename			1						Attributes - General	Group filename	ZX 20200624 Cavin4b_FDR.group
RESULTS_SEARCH_1_PARAMETERS_PARAGON_METHOD_SETTINGS_UI_START_TIME	Start date		1		2021-01-19 16:10:26					Attributes - General	Start date	2021-01-19 16:10:26
RESULTS_SEARCH_STAT_search_begin_time_clock	Start time		1		01/19/2021 16:10:26					Attributes - General	Start time	01/19/2021 16:10:26
RESULTS_SEARCH_1_PARAMETERS_PARAGON_METHOD_SETTINGS_UI_USER_NAME	User name		1		IMB-MASS02\massuser					Attributes - General	User name	IMB-MASS02\massuser
RESULTS_SEARCH_1_xml:id	Internal search identifier number		1	1						Attributes - General	Internal search identifier number
PARAMETERS_PEAKLIST_original_count				1						Attributes - Input data	Number of spectra in search	123242
PARAMETERS_PEAKLIST_count				1						Attributes - Input data	Number of non-empty spectra in search	123233
PARAMETERS_PEAKLIST_filenumber	Number of input files	1	1	1	26					Attributes - Input data	Number of input files	26
RESULTS_SEARCH_1_PARAMETERS_PARAGON_METHOD_SETTINGS_UI_SAMPLE_TYPE	Sample Type		1		Identification					Parameters - User settings	Sample Type	Identification
RESULTS_SEARCH_1_PARAMETERS_PARAGON_METHOD_SETTINGS_UI_CYS_ALKYLATION	Cysteine Alkylation		1		Iodoacetamide w other Cys mods possible					Parameters - User settings	Cysteine Alkylation	Iodoacetamide w other Cys mods possible
RESULTS_SEARCH_1_PARAMETERS_PARAGON_METHOD_SETTINGS_UI_DIGESTION	Digestion		1		Trypsin + Lys C					Parameters - User settings	Digestion	Trypsin + Lys C
RESULTS_SEARCH_1_PARAMETERS_PARAGON_METHOD_SETTINGS_UI_SPECIAL_FACTOR	Special Factors		1		Gel-based ID					Parameters - User settings	Special Factors	Gel-based ID
RESULTS_SEARCH_1_PARAMETERS_PARAGON_METHOD_SETTINGS_UI_INSTRUMENT	Instrument		1		TripleTOF 6600					Parameters - User settings	Instrument	TripleTOF 6600
RESULTS_SEARCH_1_PARAMETERS_PARAGON_METHOD_SETTINGS_UI_SPECIES	Species									Parameters - User settings	Species
RESULTS_SEARCH_1_PARAMETERS_PARAGON_METHOD_SETTINGS_UI_SEARCH_EFFORT	Search Effort		1		Thorough					Parameters - User settings	Search Effort	Thorough
RESULTS_SEARCH_1_PARAMETERS_PARAGON_METHOD_SETTINGS_UI_ID_FOCUS	ID Focus									Parameters - User settings	ID Focus
RESULTS_SEARCH_1_PARAMETERS_PARAGON_METHOD_SETTINGS_UI_MIN_UNUSED_PROTSCORE	Minimum Unused ProtScore		1		0.0458					Parameters - User settings	Minimum Unused ProtScore	0.0458
RESULTS_SEARCH_1_PARAMETERS_PARAGON_METHOD_SETTINGS_UI_PSPEP	FDR Analysis		1		TRUE		Logical to English			Parameters - User settings	FDR Analysis	Yes
	Quantitation						Logical to English			Parameters - User settings	Quantitation
RESULTS_SEARCH_1_PARAMETERS_QUANT_TYPE_background_correction	Background Correction		1		FALSE		Logical to English			Parameters - User settings	Background Correction	No
RESULTS_SEARCH_1_PARAMETERS_QUANT_TYPE_bias_correction	Bias Correction		1		TRUE		Logical to English			Parameters - User settings	Bias Correction	Yes
	Channel to use as denominator in ratios									Parameters - User settings	Channel to use as denominator in ratios
RESULTS_SEARCH_1_PARAMETERS_chemical_data_edited	Modified Data Dictionary or Parameter Translation		1		FALSE		Logical to English			Parameters - User settings	Modified Data Dictionary or Parameter Translation	No
RESULTS_SEARCH_1_PARAMETERS_FASTA_filename	Database filename		1		C:\AB SCIEX\ProteinPilot Data\SearchDatabases\uniprot-zebrafish_with_Clover.fasta					Attributes - Search database	Database filename	C:\AB SCIEX\ProteinPilot Data\SearchDatabases\uniprot-zebrafish_with_Clover.fasta
				1						Attributes - Search database	Number of Proteins in Database	75212
RESULTS_SEARCH_STAT_num_proteins	Number of proteins searched		1		150424					Attributes - Search database	Number of proteins searched	150424
				1						Attributes - Search database	Number of Residues in Database	37854281
RESULTS_SEARCH_STAT_num_residues	Number of residues searched		1		75708562					Attributes - Search database	Number of residues searched	75708562
RESULTS_SEARCH_STAT_computer_memory	RAM (MB)		1		32767					Attributes - Hardware	RAM (MB)	32767
RESULTS_SEARCH_STAT_computer_name	Computer name		1		IMB-MASS02					Attributes - Hardware	Computer name	IMB-MASS02
RESULTS_SEARCH_STAT_number_cores	Number of cores in computer		1		8					Attributes - Hardware	Number of cores in computer	8
RESULTS_SEARCH_STAT_number_processors	Number of threads (double cores if hyperthreading on)		1		8					Attributes - Hardware	Number of threads (double cores if hyperthreading on)	8
RESULTS_SEARCH_STAT_number_licensed_tasks	Number of cores licensed to use		1		16					Attributes - Software environment	Number of cores licensed to use	16
RESULTS_SEARCH_STAT_os	Operating system		1		Windows Server 2008 R2 Standard (6.1.7600)					Attributes - Software environment	Operating system	Windows Server 2008 R2 Standard (6.1.7600)
RESULTS_SEARCH_1_PARAMETERS_VERSION	ProteinPilot Software Version		1		5.0.1.0, 4895					Attributes - Software environment	ProteinPilot Software Version	5.0.1.0, 4895
RESULTS_SEARCH_1_PARAMETERS_PARAGON_VERSION	Paragon Algorithm Version		1		5.0.1.0, 4874					Attributes - Software environment	Paragon Algorithm Version	5.0.1.0, 4874
RESULTS_SEARCH_1_PARAMETERS_APPLICATION	Application name		1		ProteinPilot(tm) Software					Attributes - Software environment	Application name	ProteinPilot(tm) Software
RESULTS_GROUPRESULTSUMMARY_1_confidence	Confidence of first row in summary statistics ID statistics		1		0.99		Fraction to %	100		Statistics - Protein Summary Table	Percent Confidence of first row in Summary Statistics ID Statistics	99
RESULTS_GROUPRESULTSUMMARY_1_distinctpeptides	Distinct peptides associated with 99% confidence proteins		1		362					Statistics - Protein Summary Table	Distinct peptides associated with 99% confidence proteins	362
RESULTS_GROUPRESULTSUMMARY_1_proteinsbeforegroupping	Proteins before grouping (99% confidence)		1		75					Statistics - Protein Summary Table	Proteins before grouping (99% confidence)	75
RESULTS_GROUPRESULTSUMMARY_1_proteinsidentified	Proteins detected (99% confidence)		1		22					Statistics - Protein Summary Table	Proteins detected (99% confidence)	22
RESULTS_GROUPRESULTSUMMARY_1_spectraidentified	Spectra associated with 99% confidence proteins		1		2888					Statistics - Protein Summary Table	Spectra associated with 99% confidence proteins	2888
RESULTS_GROUPRESULTSUMMARY_2_confidence	Confidence of second row in Summary Statistics ID statistics		1		0.95		Fraction to %	100		Statistics - Protein Summary Table	Percent Confidence of first row in Summary Statistics ID Statistics	95
RESULTS_GROUPRESULTSUMMARY_2_distinctpeptides	Distinct peptides associated with 95% confidence proteins		1		386					Statistics - Protein Summary Table	Distinct peptides associated with 95% confidence proteins	386
RESULTS_GROUPRESULTSUMMARY_2_proteinsbeforegroupping	Proteins before grouping (95% confidence)		1		167					Statistics - Protein Summary Table	Proteins before grouping (95% confidence)	167
RESULTS_GROUPRESULTSUMMARY_2_proteinsidentified	Proteins detected (95% confidence)		1		33					Statistics - Protein Summary Table	Proteins detected (95% confidence)	33
RESULTS_GROUPRESULTSUMMARY_2_spectraidentified	Spectra associated with 95% confidence proteins		1		3059					Statistics - Protein Summary Table	Spectra associated with 95% confidence proteins	3059
RESULTS_GROUPRESULTSUMMARY_3_confidence	Confidence of third row in summary statistics ID statistics		1		0.66		Fraction to %	100		Statistics - Protein Summary Table	Percent Confidence of first row in Summary Statistics ID Statistics	66
RESULTS_GROUPRESULTSUMMARY_3_distinctpeptides	Distinct peptides associated with 66% confidence proteins		1		399					Statistics - Protein Summary Table	Distinct peptides associated with 66% confidence proteins	399
RESULTS_GROUPRESULTSUMMARY_3_proteinsbeforegroupping	Proteins before grouping (66% confidence)		1		205					Statistics - Protein Summary Table	Proteins before grouping (66% confidence)	205
RESULTS_GROUPRESULTSUMMARY_3_proteinsidentified	Proteins detected (66% confidence)		1		42					Statistics - Protein Summary Table	Proteins detected (66% confidence)	42
RESULTS_GROUPRESULTSUMMARY_3_spectraidentified	Spectra associated with 66% confidence proteins		1		3273					Statistics - Protein Summary Table	Spectra associated with 66% confidence proteins	3273
RESULTS_GROUPRESULTSUMMARY_4_confidence	Confidence of fourth row in Summary Statistics ID statistics		1		0.100088		Fraction to %	100		Statistics - Protein Summary Table	Percent Confidence of first row in Summary Statistics ID Statistics	10.0088
RESULTS_GROUPRESULTSUMMARY_4_distinctpeptides	Distinct peptides associated with 10% confidence proteins		1		507					Statistics - Protein Summary Table	Distinct peptides associated with 10% confidence proteins	507
RESULTS_GROUPRESULTSUMMARY_4_proteinsbeforegroupping	Proteins before grouping (10% confidence)		1		533					Statistics - Protein Summary Table	Proteins before grouping (10% confidence)	533
RESULTS_GROUPRESULTSUMMARY_4_proteinsidentified	Proteins detected (10% confidence)		1		120					Statistics - Protein Summary Table	Proteins detected (10% confidence)	120
RESULTS_GROUPRESULTSUMMARY_4_spectraidentified	Spectra associated with 10% confidence proteins		1		5036					Statistics - Protein Summary Table	Spectra associated with 10% confidence proteins	5036
PARAMETERS_PEAKLIST_partnumber	Number of segments the input data are broken into	1	1	1	44					Parameters - Search Dimension Factors	Number of segments the input data are broken into	44
				1						Parameters - Search Dimension Factors	Number of searches per segment (2 for Thorough, 1 for Rapid)	2
				1						Parameters - Search Dimension Factors	Number of apparent sub-searches in group file	88
RESULTS_SEARCH_1_PARAMETERS_do_reverse_search	Do reversed search		1		TRUE					Parameters - Search Dimension Factors	Do reversed search	TRUE
RESULTS_SEARCH_1_PARAMETERS_QUANT_TYPE_separate_searches	Do separate searches for each plex in MS1 quantitation		1		FALSE					Parameters - Search Dimension Factors	Do separate searches for each plex in MS1 quantitation	FALSE
RESULTS_SEARCH_1_PARAMETERS_maxresults	Maximum number of hypotheses to keep per spectrum		1		15					Parameters - Search Dimension Factors	Maximum number of hypotheses to keep per spectrum	15
RESULTS_SEARCH_1_PARAMETERS_MSTOLERANCE_type	MS1 initial mass error tolerance type		1		dalton					Parameters - Identification - Mass accuracy	MS1 initial mass error tolerance type	dalton
RESULTS_SEARCH_1_PARAMETERS_MSTOLERANCE_value	MS1 initial mass error tolerance value		1		0.05					Parameters - Identification - Mass accuracy	MS1 initial mass error tolerance value	0.05
RESULTS_SEARCH_1_PARAMETERS_MSMSTOLERANCE_type	MS2 initial mass error tolerance type		1		dalton					Parameters - Identification - Mass accuracy	MS2 initial mass error tolerance type	dalton
RESULTS_SEARCH_1_PARAMETERS_MSMSTOLERANCE_value	MS2 initial mass error tolerance value		1		0.1					Parameters - Identification - Mass accuracy	MS2 initial mass error tolerance value	0.1
RESULTS_SEARCH_1_PARAMETERS_MS_STANDARD_DEVIATION_type	MS1 final mass error standard deviation type		1		dalton					Parameters - Identification - Mass accuracy	MS1 final mass error standard deviation type	dalton
RESULTS_SEARCH_1_PARAMETERS_MS_STANDARD_DEVIATION_value	MS1 final mass error standard deviation value		1		0.0011					Parameters - Identification - Mass accuracy	MS1 final mass error standard deviation value	0.0011
RESULTS_SEARCH_1_PARAMETERS_MSMS_STANDARD_DEVIATION_type	MS2 final mass error standard deviation type		1		dalton					Parameters - Identification - Mass accuracy	MS2 final mass error standard deviation type	dalton
RESULTS_SEARCH_1_PARAMETERS_MSMS_STANDARD_DEVIATION_value	MS2 final mass error standard deviation value		1		0.01					Parameters - Identification - Mass accuracy	MS2 final mass error standard deviation value	0.01
RESULTS_SEARCH_1_PARAMETERS_do_multiprecursor_search	Use multi-precursor search function		1		TRUE					Parameters - Identification - Multi-precursor search	Use multi-precursor search function	TRUE
RESULTS_SEARCH_1_PARAMETERS_MAX_PRECURSORS_FRAGLET	Maximum number of different precursor masses to try to match to in the Fraglet stage when doing multi-precursor search		1		5					Parameters - Identification - Multi-precursor search	Maximum number of different precursor masses to try to match to in the Fraglet stage when doing multi-precursor search	5
RESULTS_SEARCH_1_PARAMETERS_PRECURSORS_DR_FRAGLET	Maximum dynamic range gap of secondary precursors vs primary precursor in the Fraglet stage when doing multi-precursor search		1		10					Parameters - Identification - Multi-precursor search	Maximum dynamic range gap of secondary precursors vs primary precursor in the Fraglet stage when doing multi-precursor search	10
RESULTS_SEARCH_1_PARAMETERS_MAX_PRECURSORS_TAGLET	Maximum number of different precursor masses to try to match to in the Taglet stage when doing multi-precursor search		1		1					Parameters - Identification - Multi-precursor search	Maximum number of different precursor masses to try to match to in the Taglet stage when doing multi-precursor search	1
RESULTS_SEARCH_1_PARAMETERS_PRECURSORS_DR_TAGLET	Maximum dynamic range gap of secondary precursors vs primary precursor in the Taglet stage when doing multi-precursor search		1		3					Parameters - Identification - Multi-precursor search	Maximum dynamic range gap of secondary precursors vs primary precursor in the Taglet stage when doing multi-precursor search	3
RESULTS_SEARCH_1_PARAMETERS_DEFAULT_CHARGE_STATE_1_charge	First charge state to consider when precursor z is not determined		1		2					Parameters - Identification - Charge ambiguity	First charge state to consider when precursor z is not determined	2
RESULTS_SEARCH_1_PARAMETERS_DEFAULT_CHARGE_STATE_1_probability	Probability of first charge state to consider when precursor z is not determined		1		1					Parameters - Identification - Charge ambiguity	Probability of first charge state to consider when precursor z is not determined	1
RESULTS_SEARCH_1_PARAMETERS_DEFAULT_CHARGE_STATE_2_charge	Second charge state to consider when precursor z is not determined		1		3					Parameters - Identification - Charge ambiguity	Second charge state to consider when precursor z is not determined	3
RESULTS_SEARCH_1_PARAMETERS_DEFAULT_CHARGE_STATE_2_probability	Probability of second charge state to consider when precursor z is not determined		1		1					Parameters - Identification - Charge ambiguity	Probability of second charge state to consider when precursor z is not determined	1
RESULTS_SEARCH_1_PARAMETERS_DEFAULT_CHARGE_STATE_3_charge	Third charge state to consider when precursor z is not determined		1		4					Parameters - Identification - Charge ambiguity	Third charge state to consider when precursor z is not determined	4
RESULTS_SEARCH_1_PARAMETERS_DEFAULT_CHARGE_STATE_3_probability	Probability of third charge state to consider when precursor z is not determined		1		1					Parameters - Identification - Charge ambiguity	Probability of third charge state to consider when precursor z is not determined	1
RESULTS_SEARCH_1_PARAMETERS_DEFAULT_CHARGE_STATE_4_charge	Fourth charge state to consider when precursor z is not determined									Parameters - Identification - Charge ambiguity	Fourth charge state to consider when precursor z is not determined
RESULTS_SEARCH_1_PARAMETERS_DEFAULT_CHARGE_STATE_4_probability	Probability of fourth charge state to consider when precursor z is not determined									Parameters - Identification - Charge ambiguity	Probability of fourth charge state to consider when precursor z is not determined
RESULTS_SEARCH_1_PARAMETERS_PROGROUP_bayesconfidencecalclulation	Use Bayesian protein confidence calculation		1		TRUE					Parameters - Protein Grouping	Use Bayesian protein confidence calculation	TRUE
RESULTS_SEARCH_1_PARAMETERS_PROGROUP_calibrateconfidence	Use peptide FDR analysis to recalibrate peptide confidences		1		TRUE					Parameters - Protein Grouping	Use peptide FDR analysis to recalibrate peptide confidences	TRUE
RESULTS_SEARCH_1_PARAMETERS_PROGROUP_focusingintersection	In mid-Pro Group, minimum Intersection ProtScore to be in Same Group		1		4					Parameters - Protein Grouping	In mid-Pro Group, minimum Intersection ProtScore to be in Same Group	4
RESULTS_SEARCH_1_PARAMETERS_PROGROUP_focusingminunusedprotscore	In mid-Pro Group, minimum Unused ProtScore to keep a Group		1		0.1					Parameters - Protein Grouping	In mid-Pro Group, minimum Unused ProtScore to keep a Group	0.1
RESULTS_SEARCH_1_PARAMETERS_PROGROUP_focusingsubsetcutoff	In mid-Pro Group, keep competitor proteins with ProtScore units from winner		1		6					Parameters - Protein Grouping	In mid-Pro Group, keep competitor proteins with ProtScore units from winner	6
RESULTS_SEARCH_1_PARAMETERS_PROGROUP_intersection	In final Pro Group, minimum Intersection ProtScore to be in same group		1		1.3					Parameters - Protein Grouping	In final Pro Group, minimum Intersection ProtScore to be in same group	1.3
RESULTS_SEARCH_1_PARAMETERS_PROGROUP_minunusedprotscore	In final Pro Group, minimum Unused ProtScore to keep a group		1		0.0458					Parameters - Protein Grouping	In final Pro Group, minimum Unused ProtScore to keep a group	0.0458
RESULTS_SEARCH_1_PARAMETERS_PROGROUP_subsetcutoff	In final Pro Group, keep competitor proteins with ProtScore units from winner		1		2					Parameters - Protein Grouping	In final Pro Group, keep competitor proteins with ProtScore units from winner	2
RESULTS_SEARCH_1_PARAMETERS_QUANT_TYPE_background_correction	Do isobaric quant background correction algorithm		1		FALSE					Parameters - Quantitation - processing	Do isobaric quant background correction algorithm	FALSE
RESULTS_SEARCH_1_PARAMETERS_QUANT_TYPE_bias_correction	Normalize the central tendency of protein ratios to be unity		1		TRUE					Parameters - Quantitation - processing	Normalize the central tendency of protein ratios to be unity	TRUE
RESULTS_SEARCH_1_PARAMETERS_QUANT_TYPE_median_statistic	Compute protein-level ratios from the median of peptide ratios		1		TRUE					Parameters - Quantitation - processing	Compute protein-level ratios from the median of peptide ratios	TRUE
RESULTS_SEARCH_1_PARAMETERS_QUANT_TYPE_quant_threshold	Quant threshold setting no longer used		1		-1					Parameters - Quantitation - processing	Quant threshold setting no longer used	-1
RESULTS_SEARCH_1_PARAMETERS_QUANT_TYPE_quant_threshold_sn	Use measures for quantitation if signal to noise is greater than		1		9					Parameters - Quantitation - processing	Use measures for quantitation if signal to noise is greater than	9
RESULTS_SEARCH_1_PARAMETERS_max_quant_labels	Maximum number of labels allowed on a peptide for it to be used for quantitation		1		35					Parameters - Quantitation - curation	Maximum number of labels allowed on a peptide for it to be used for quantitation	35
RESULTS_SEARCH_1_PARAMETERS_QUANT_TYPE_keep_extreme_peptides_over_fraction	Include extreme ratios in the protein ratio calculation if the fraction of peptides from a protein having extreme ratios is greater than		1		0					Parameters - Quantitation - curation	Include extreme ratios in the protein ratio calculation if the fraction of peptides from a protein having extreme ratios is greater than	0
RESULTS_SEARCH_1_PARAMETERS_QUANT_TYPE_low_confidence_check	Exclude quantitation data if identification confidence does not pass a threshold value		1		TRUE					Parameters - Quantitation - curation	Exclude quantitation data if identification confidence does not pass a threshold value	TRUE
RESULTS_SEARCH_1_PARAMETERS_QUANT_TYPE_low_intensity_check	Exclude quantitation data if a minimum intensity is not passed		1		TRUE					Parameters - Quantitation - curation	Exclude quantitation data if a minimum intensity is not passed	TRUE
RESULTS_SEARCH_1_PARAMETERS_QUANT_TYPE_mod_check	Exclude quantitation data based on discordant peptide logic		1		TRUE					Parameters - Quantitation - curation	Exclude quantitation data based on discordant peptide logic	TRUE
RESULTS_SEARCH_1_PARAMETERS_QUANT_TYPE_shared_msms_check	Exclude quantitation data using sharing logic		1		TRUE					Parameters - Quantitation - curation	Exclude quantitation data using sharing logic	TRUE
RESULTS_SEARCH_1_PARAMETERS_PROGROUP_unusedprotscorethresholdforexcludingothersfromquant	Minimum protein confidence to consider a protein confident and capable of excluding spectra as shared		1		1.3					Parameters - Quantitation - curation	Minimum protein confidence to consider a protein confident and capable of excluding spectra as shared	1.3
RESULTS_SEARCH_1_PARAMETERS_PROGROUP_confidencepercentthresholdforexcludingothersfromquant	Minimum peptide percent confidence from a confident protein to consider a spectrum shared		1		15					Parameters - Quantitation - curation	Minimum peptide percent confidence from a confident protein to consider a spectrum shared	15
RESULTS_SEARCH_1_PARAMETERS_PROGROUP_confidencepercentthresholdforincludingselfinquant	Minimum peptide confidence to be used for quantitation		1		15					Parameters - Quantitation - curation	Minimum peptide confidence to be used for quantitation	15
RESULTS_SEARCH_1_PARAMETERS_PROGROUP_autodiscordantpeptidethreshold	Consider a peptide discordant if joint feature probability less than		1		0.3					Parameters - Quantitation - curation	Consider a peptide discordant if joint feature probability less than	0.3
RESULTS_SEARCH_1_PARAMETERS_PROGROUP_compresspeptides	Show results only for distinct peptides, suppressing redundancy		1		FALSE					Parameters - Non-functional	Show results only for distinct peptides, suppressing redundancy	FALSE
RESULTS_SEARCH_1_PARAMETERS_PROGROUP_donotstoremspeaklists	Do not store MS1 level data		1		FALSE					Parameters - Non-functional	Do not store MS1 level data	FALSE
RESULTS_SEARCH_STAT_search_begin_time_clock	Start time - Search		1		01/19/2021 16:10:26					Statistics - Processing Times - Start&Stop Clock Times	Start time - Search	01/19/2021 16:10:26
RESULTS_SEARCH_STAT_search_end_time_clock	End time - Search		1		01/20/2021 19:25:57					Statistics - Processing Times - Start&Stop Clock Times	End time - Search	01/20/2021 19:25:57
RESULTS_SEARCH_STAT_stage_searching_begin_time_clock	Start time - Identification algorithm stages		1		01/20/2021 16:21:18					Statistics - Processing Times - Start&Stop Clock Times	Start time - Identification algorithm stages	01/20/2021 16:21:18
RESULTS_SEARCH_STAT_stage_searching_end_time_clock	End time - Identification algorithm stages		1		01/20/2021 18:27:50					Statistics - Processing Times - Start&Stop Clock Times	End time - Identification algorithm stages	01/20/2021 18:27:50
RESULTS_SEARCH_STAT_stage_signal_processing_begin_time_clock	Start time - Signal processing stage		1		01/19/2021 16:10:26					Statistics - Processing Times - Start&Stop Clock Times	Start time - Signal processing stage	01/19/2021 16:10:26
RESULTS_SEARCH_STAT_stage_signal_processing_end_time_clock	End time - Signal processing stage		1		01/20/2021 16:18:19					Statistics - Processing Times - Start&Stop Clock Times	End time - Signal processing stage	01/20/2021 16:18:19
RESULTS_SEARCH_STAT_stage_waiting_begin_time_clock	Start time - Waiting stage		1		01/20/2021 16:18:19					Statistics - Processing Times - Start&Stop Clock Times	Start time - Waiting stage	01/20/2021 16:18:19
RESULTS_SEARCH_STAT_stage_waiting_end_time_clock	End time - Waiting stage		1		01/20/2021 16:21:18					Statistics - Processing Times - Start&Stop Clock Times	End time - Waiting stage	01/20/2021 16:21:18
RESULTS_SEARCH_STAT_task_fraglet_exe_begin_time_clock	Start time - Fraglet Algorithm search stage		1		01/20/2021 16:39:22					Statistics - Processing Times - Start&Stop Clock Times	Start time - Fraglet Algorithm search stage	01/20/2021 16:39:22
RESULTS_SEARCH_STAT_task_fraglet_exe_end_time_clock	End time - Fraglet Algorithm search stage		1		01/20/2021 17:58:07					Statistics - Processing Times - Start&Stop Clock Times	End time - Fraglet Algorithm search stage	01/20/2021 17:58:07
RESULTS_SEARCH_STAT_task_focusing_begin_time_clock	Start time - Mid-Pro Group Algorithm stage		1		01/20/2021 17:58:07					Statistics - Processing Times - Start&Stop Clock Times	Start time - Mid-Pro Group Algorithm stage	01/20/2021 17:58:07
RESULTS_SEARCH_STAT_task_focusing_end_time_clock	End time - Mid-Pro Group Algorithm stage		1		01/20/2021 18:02:29					Statistics - Processing Times - Start&Stop Clock Times	End time - Mid-Pro Group Algorithm stage	01/20/2021 18:02:29
RESULTS_SEARCH_STAT_task_taglet_exe_begin_time_clock	Start time - Taglet Algorithm search stage		1		01/20/2021 18:02:29					Statistics - Processing Times - Start&Stop Clock Times	Start time - Taglet Algorithm search stage	01/20/2021 18:02:29
RESULTS_SEARCH_STAT_task_taglet_exe_end_time_clock	End time - Taglet Algorithm search stage		1		01/20/2021 18:19:53					Statistics - Processing Times - Start&Stop Clock Times	End time - Taglet Algorithm search stage	01/20/2021 18:19:53
RESULTS_SEARCH_STAT_task_progroup_begin_time_clock	Start time - Final Pro Group Algorithm stage		1		01/20/2021 18:19:53					Statistics - Processing Times - Start&Stop Clock Times	Start time - Final Pro Group Algorithm stage	01/20/2021 18:19:53
RESULTS_SEARCH_STAT_task_progroup_end_time_clock	End time - Final Pro Group Algorithm stage		1		01/20/2021 18:27:50					Statistics - Processing Times - Start&Stop Clock Times	End time - Final Pro Group Algorithm stage	01/20/2021 18:27:50
RESULTS_SEARCH_STAT_stage_fdr_begin_time_clock	Start time - FDR analysis stage		1		01/20/2021 18:27:51					Statistics - Processing Times - Start&Stop Clock Times	Start time - FDR analysis stage	01/20/2021 18:27:51
RESULTS_SEARCH_STAT_stage_fdr_end_time_clock	End time - FDR analysis stage		1		01/20/2021 19:25:57					Statistics - Processing Times - Start&Stop Clock Times	End time - FDR analysis stage	01/20/2021 19:25:57
RESULTS_SEARCH_STAT_search_time_duration	Clock Time Duration for Full Search (ms)		1		98131769		msec to min	1.66667e-05		Statistics - Processing Times - Duration in Real Clock Times	Clock time duration - Full search (min)	1635.53
RESULTS_SEARCH_STAT_stage_searching_time_duration	Clock Time Duration for Identification Algorithm Stages (ms)		1		7591722		msec to min	1.66667e-05		Statistics - Processing Times - Duration in Real Clock Times	Clock time duration - Identification algorithm stages (min)	126.529
RESULTS_SEARCH_STAT_stage_signal_processing_time_duration	Clock Time Duration for Waiting Stage (ms)		1		86873032		msec to min	1.66667e-05		Statistics - Processing Times - Duration in Real Clock Times	Clock time duration - Signal processing stage (min)	1447.88
RESULTS_SEARCH_STAT_stage_waiting_time_duration	Clock Time Duration for Signal Processing Stage (ms)		1		178751		msec to min	1.66667e-05		Statistics - Processing Times - Duration in Real Clock Times	Clock time duration - Waiting stage (min)	2.97918
RESULTS_SEARCH_STAT_task_fraglet_exe_time_duration	Clock Time Duration for Fraglet Algorithm Stage (ms)		1		4725486		msec to min	1.66667e-05		Statistics - Processing Times - Duration in Real Clock Times	Clock time duration - Fraglet Algorithm stage (min)	78.7581
RESULTS_SEARCH_STAT_task_focusing_time_duration	Clock Time Duration for Mid-Pro Group Algorithm Stage (ms)		1		261996		msec to min	1.66667e-05		Statistics - Processing Times - Duration in Real Clock Times	Clock time duration - Mid-Pro Group Algorithm stage (min)	4.3666
RESULTS_SEARCH_STAT_task_taglet_exe_time_duration	Clock Time Duration for Taglet Algorithm Stage (ms)		1		1043290		msec to min	1.66667e-05		Statistics - Processing Times - Duration in Real Clock Times	Clock time duration - Taglet Algorithm stage (min)	17.3882
RESULTS_SEARCH_STAT_task_progroup_time_duration	Clock Time Duration for Pro Group Algorithm Stage (ms)		1		476894		msec to min	1.66667e-05		Statistics - Processing Times - Duration in Real Clock Times	Clock time duration - Pro Group Algorithm stage (min)	7.94823
RESULTS_SEARCH_STAT_stage_fdr_time_duration	Clock Time Duration for FDR Analysis (ms)		1		3486562		msec to min	1.66667e-05		Statistics - Processing Times - Duration in Real Clock Times	Clock time duration - FDR Analysis (min)	58.1094
				1						Statistics - Processing Times - Duration in Real Clock Times	Clock time not accounted for in measured stages	18.096
	CPU Time Duration for Signal Processing Stage (ms)						msec to min	1.66667e-05		Statistics - Processing Times - Duration in CPU Time	CPU time duration - Signal Processing stage (min)
RESULTS_SEARCH_STAT_task_fraglet_exe_time_cpu	CPU Time Duration for Fraglet Algorithm Stage (ms)		1		10440429		msec to min	1.66667e-05		Statistics - Processing Times - Duration in CPU Time	CPU time duration - Fraglet Algorithm stage (min)	174.007
RESULTS_SEARCH_STAT_task_focusing_time_cpu	CPU Time Duration for Mid-Pro Group Algorithm Stage (ms)		1		296448		msec to min	1.66667e-05		Statistics - Processing Times - Duration in CPU Time	CPU time duration - Mid-Pro Group Algorithm stage (min)	4.9408
RESULTS_SEARCH_STAT_task_taglet_exe_time_cpu	CPU Time Duration for Taglet Algorithm Stage (ms)		1		7371936		msec to min	1.66667e-05		Statistics - Processing Times - Duration in CPU Time	CPU time duration - Taglet Algorithm stage (min)	122.866
RESULTS_SEARCH_STAT_task_progroup_time_cpu	CPU Time Duration for Pro Group Algorithm Stage (ms)		1		506847		msec to min	1.66667e-05		Statistics - Processing Times - Duration in CPU Time	CPU time duration - Pro Group Algorithm stage (min)	8.44745
				1						Statistics - Processing Times - Percent by Stage	Percent of clock time - Identification Algorithm stages	0.0773625
				1						Statistics - Processing Times - Percent by Stage	Percent of clock time - Signal Processing stage	0.885269
				1						Statistics - Processing Times - Percent by Stage	Percent of clock time - Waiting stage	0.00182154
				1						Statistics - Processing Times - Percent by Stage	Percent of clock time - Fraglet Algorithm stage	0.0481545
				1						Statistics - Processing Times - Percent by Stage	Percent of clock time - Mid-Pro Group Algorithm stage	0.00266984
				1						Statistics - Processing Times - Percent by Stage	Percent of clock time - Taglet Algorithm stage	0.0106315
				1						Statistics - Processing Times - Percent by Stage	Percent of clock time - Pro Group Algorithm stage	0.00485973
				1						Statistics - Processing Times - Percent by Stage	Percent of clock time - FDR Analysis	0.0355294
				1						Statistics - Processing Rate - Clock (Sec/Spectrum)	Clock time rate (sec/spect) - Full Search	0.796253
				1						Statistics - Processing Rate - Clock (Sec/Spectrum)	Clock time rate (sec/spect) - Identification Algorithm stages	0.0616001
				1						Statistics - Processing Rate - Clock (Sec/Spectrum)	Clock time rate (sec/spect) - Signal processing stage	0.704898
				1						Statistics - Processing Rate - Clock (Sec/Spectrum)	Clock time rate (sec/spect) - Waiting stage	0.00145041
				1						Statistics - Processing Rate - Clock (Sec/Spectrum)	Clock time rate (sec/spect) - Fraglet Algorithm stage	0.0383431
				1						Statistics - Processing Rate - Clock (Sec/Spectrum)	Clock time rate (sec/spect) - Mid-Pro Group Algorithm stage	0.00212587
				1						Statistics - Processing Rate - Clock (Sec/Spectrum)	Clock time rate (sec/spect) - Taglet Algorithm stage	0.00846538
				1						Statistics - Processing Rate - Clock (Sec/Spectrum)	Clock time rate (sec/spect) - Pro Group Algorithm stage	0.00386957
				1						Statistics - Processing Rate - Clock (Sec/Spectrum)	Clock time rate (sec/spect) - FDR Analysis	0.0282904
				1						Statistics - Processing Rate - CPU (Sec/Spectrum)	CPU time rate (sec/spect) - Signal processing stage
				1						Statistics - Processing Rate - CPU (Sec/Spectrum)	CPU time rate (sec/spect) - Fraglet Algorithm stage	0.0847149
				1						Statistics - Processing Rate - CPU (Sec/Spectrum)	CPU time rate (sec/spect) - Mid-Pro Group Algorithm stage	0.00240541
				1						Statistics - Processing Rate - CPU (Sec/Spectrum)	CPU time rate (sec/spect) - Taglet Algorithm stage	0.0598168
				1						Statistics - Processing Rate - CPU (Sec/Spectrum)	CPU time rate (sec/spect) - Pro Group Algorithm stage	0.00411262
				1						Statistics - Processing Rate - Clock (Sec/Spectrum/DB Protein)	Clock time rate (sec/spect/DB protein) - Full search	5.29339e-06
				1						Statistics - Processing Rate - Clock (Sec/Spectrum/DB Protein)	Clock time rate (sec/spect/DB protein) - Identification algorithm stages	4.0951e-07
				1						Statistics - Processing Rate - Clock (Sec/Spectrum/DB Protein)	Clock time rate (sec/spect/DB protein) - Signal processing stage	4.68607e-06
				1						Statistics - Processing Rate - Clock (Sec/Spectrum/DB Protein)	Clock time rate (sec/spect/DB protein) - Waiting stage	9.64212e-09
				1						Statistics - Processing Rate - Clock (Sec/Spectrum/DB Protein)	Clock time rate (sec/spect/DB protein) - Fraglet Algorithm stage	2.549e-07
				1						Statistics - Processing Rate - Clock (Sec/Spectrum/DB Protein)	Clock time rate (sec/spect/DB protein) - Mid-Pro Group Algorithm stage	1.41325e-08
				1						Statistics - Processing Rate - Clock (Sec/Spectrum/DB Protein)	Clock time rate (sec/spect/DB protein) - Taglet Algorithm stage	5.62768e-08
				1						Statistics - Processing Rate - Clock (Sec/Spectrum/DB Protein)	Clock time rate (sec/spect/DB protein) - Pro Group Algorithm stage	2.57244e-08
				1						Statistics - Processing Rate - Clock (Sec/Spectrum/DB Protein)	Clock time rate (sec/spect/DB protein) - FDR Analysis	1.88071e-07
				1						Statistics - Processing Rate - CPU (Sec/Spectrum/DB Protein)	CPU time rate (sec/spect/DB protein) - Signal processing stage
				1						Statistics - Processing Rate - CPU (Sec/Spectrum/DB Protein)	CPU time rate (sec/spect/DB protein) - Fraglet Algorithm stage	5.63174e-07
				1						Statistics - Processing Rate - CPU (Sec/Spectrum/DB Protein)	CPU time rate (sec/spect/DB protein) - Mid-Pro Group Algorithm stage	1.59909e-08
				1						Statistics - Processing Rate - CPU (Sec/Spectrum/DB Protein)	CPU time rate (sec/spect/DB protein) - Taglet Algorithm stage	3.97654e-07
				1						Statistics - Processing Rate - CPU (Sec/Spectrum/DB Protein)	CPU time rate (sec/spect/DB protein) - Pro Group Algorithm stage	2.73402e-08
				1						Statistics - Extent of Distribution - Fundamental	Distribution factor - CPU vs. clock time - Signal processing stage
				1						Statistics - Extent of Distribution - Fundamental	Distribution factor - CPU vs. clock time - Fraglet Algorithm stage	2.20939
				1						Statistics - Extent of Distribution - Fundamental	Distribution factor - CPU vs. clock time - Mid-Pro Group Algorithm stage	1.1315
				1						Statistics - Extent of Distribution - Fundamental	Distribution factor - CPU vs. clock time - Taglet Algorithm stage	7.06605
				1						Statistics - Extent of Distribution - Fundamental	Distribution factor - CPU vs. clock time - Pro Group Algorithm stage	1.06281
				1						Statistics - Extent of Distribution - vs Segments	Ratio of distribution factor to number of search segments - Signal processing stage
				1						Statistics - Extent of Distribution - vs Segments	Ratio of distribution factor to number of search segments - Fraglet Algorithm stage	0.0502133
				1						Statistics - Extent of Distribution - vs Segments	Ratio of distribution factor to number of search segments - Mid-Pro Group Algorithm stage	0.0257159
				1						Statistics - Extent of Distribution - vs Segments	Ratio of distribution factor to number of search segments - Taglet Algorithm stage	0.160592
				1						Statistics - Extent of Distribution - vs Segments	Ratio of distribution factor to number of search segments - Pro Group Algorithm stage	0.0241547
				1						Statistics - Extent of Distribution - vs Licensed Cores	Ratio of distribution factor to number of licensed cores - Signal processing stage
				1						Statistics - Extent of Distribution - vs Licensed Cores	Ratio of distribution factor to number of licensed cores - Fraglet Algorithm stage	0.138087
				1						Statistics - Extent of Distribution - vs Licensed Cores	Ratio of distribution factor to number of licensed cores - Mid-Pro Group Algorithm stage	0.0707186
				1						Statistics - Extent of Distribution - vs Licensed Cores	Ratio of distribution factor to number of licensed cores - Taglet Algorithm stage	0.441628
				1						Statistics - Extent of Distribution - vs Licensed Cores	Ratio of distribution factor to number of licensed cores - Pro Group Algorithm stage	0.0664255
PARAMETERS_PEAKLIST_original_count	Average number of spectra per segment	1	1	1	2800.95					Statistics - Search Segmentation	Average number of spectra per segment	2800.95
PARAMETERS_PEAKLIST_original_count	Standard deviation of number of spectra per segment	1	1	1	511.217					Statistics - Search Segmentation	Standard deviation of number of spectra per segment	511.217
PARAMETERS_PEAKLIST_original_count	Maximum number of spectra per segment	1	1	1	3997					Statistics - Search Segmentation	Maximum number of spectra per segment	3997
PARAMETERS_PEAKLIST_original_count	Minimum number of spectra per segment	1	1	1	2007					Statistics - Search Segmentation	Minimum number of spectra per segment	2007
										Attributes - Input data filenames	Filename of Input File 1	C:\AB SCIEX\ProteinPilot Data\Results\Albert\ZX 20200624 6600\ZX 20200624 C4B 1.wiff
										Attributes - Input data filenames	Filename of Input File 2	C:\AB SCIEX\ProteinPilot Data\Results\Albert\ZX 20200624 6600\ZX 20200624 C4B 2.wiff
										Attributes - Input data filenames	Filename of Input File 3	C:\AB SCIEX\ProteinPilot Data\Results\Albert\ZX 20200624 6600\ZX 20200624 C4B 3.wiff
										Attributes - Input data filenames	Filename of Input File 4	C:\AB SCIEX\ProteinPilot Data\Results\Albert\ZX 20200624 6600\ZX 20200624 C4B 4.wiff
										Attributes - Input data filenames	Filename of Input File 5	C:\AB SCIEX\ProteinPilot Data\Results\Albert\ZX 20200624 6600\ZX 20200624 C4B 5.wiff
										Attributes - Input data filenames	Filename of Input File 6	C:\AB SCIEX\ProteinPilot Data\Results\Albert\ZX 20200624 6600\ZX 20200624 C4B 6.wiff
										Attributes - Input data filenames	Filename of Input File 7	C:\AB SCIEX\ProteinPilot Data\Results\Albert\ZX 20200624 6600\ZX 20200624 C4B 7.wiff
										Attributes - Input data filenames	Filename of Input File 8	C:\AB SCIEX\ProteinPilot Data\Results\Albert\ZX 20200624 6600\ZX 20200624 C4B 8.wiff
										Attributes - Input data filenames	Filename of Input File 9	C:\AB SCIEX\ProteinPilot Data\Results\Albert\ZX 20200624 6600\ZX 20200624 C4B 9.wiff
										Attributes - Input data filenames	Filename of Input File 10	C:\AB SCIEX\ProteinPilot Data\Results\Albert\ZX 20200624 6600\ZX 20200624 C4B 10.wiff
										Attributes - Input data filenames	Filename of Input File 11	C:\AB SCIEX\ProteinPilot Data\Results\Albert\ZX 20200624 6600\ZX 20200624 C4B 11.wiff
										Attributes - Input data filenames	Filename of Input File 12	C:\AB SCIEX\ProteinPilot Data\Results\Albert\ZX 20200819 6600\ZX 20200819 6600 C4B 1.wiff
										Attributes - Input data filenames	Filename of Input File 13	C:\AB SCIEX\ProteinPilot Data\Results\Albert\ZX 20200819 6600\ZX 20200819 6600 C4B 2.wiff
										Attributes - Input data filenames	Filename of Input File 14	C:\AB SCIEX\ProteinPilot Data\Results\Albert\ZX 20200819 6600\ZX 20200819 6600 C4B 3.wiff
										Attributes - Input data filenames	Filename of Input File 15	C:\AB SCIEX\ProteinPilot Data\Results\Albert\ZX 20200819 6600\ZX 20200819 6600 C4B 4.wiff
										Attributes - Input data filenames	Filename of Input File 16	C:\AB SCIEX\ProteinPilot Data\Results\Albert\ZX 20200819 6600\ZX 20200819 6600 C4B 5.wiff
										Attributes - Input data filenames	Filename of Input File 17	C:\AB SCIEX\ProteinPilot Data\Results\Albert\ZX 20200819 6600\ZX 20200819 6600 C4B 6.wiff
										Attributes - Input data filenames	Filename of Input File 18	C:\AB SCIEX\ProteinPilot Data\Results\Albert\ZX 20200819 6600\ZX 20200819 6600 C4B 7.wiff
										Attributes - Input data filenames	Filename of Input File 19	C:\AB SCIEX\ProteinPilot Data\Results\Albert\ZX 20200819 6600\ZX 20200819 6600 C4B 8.wiff
										Attributes - Input data filenames	Filename of Input File 20	C:\AB SCIEX\ProteinPilot Data\Results\Albert\ZX 20200819 6600\ZX 20200819 6600 C4B 9.wiff
										Attributes - Input data filenames	Filename of Input File 21	C:\AB SCIEX\ProteinPilot Data\Results\Albert\ZX 20200819 6600\ZX 20200819 6600 C4B 10.wiff
										Attributes - Input data filenames	Filename of Input File 22	C:\AB SCIEX\ProteinPilot Data\Results\Albert\ZX 20200819 6600\ZX 20200819 6600 C4B 11.wiff
										Attributes - Input data filenames	Filename of Input File 23	C:\AB SCIEX\ProteinPilot Data\Results\Albert\ZX 20200819 6600\ZX 20200819 6600 C4B 12.wiff
										Attributes - Input data filenames	Filename of Input File 24	C:\AB SCIEX\ProteinPilot Data\Results\Albert\ZX 20200819 6600\ZX 20200819 6600 C4B 13.wiff
										Attributes - Input data filenames	Filename of Input File 25	C:\AB SCIEX\ProteinPilot Data\Results\Albert\ZX 20200819 6600\ZX 20200819 6600 C4B 14.wiff
										Attributes - Input data filenames	Filename of Input File 26	C:\AB SCIEX\ProteinPilot Data\Results\Albert\ZX 20200819 6600\ZX 20200819 6600 C4B 15.wiff
										Attributes - Input data filenames	Filename of Input File 27
										Attributes - Input data filenames	Filename of Input File 28
										Attributes - Input data filenames	Filename of Input File 29
										Attributes - Input data filenames	Filename of Input File 30
										Attributes - Input data filenames	Filename of Input File 31
										Attributes - Input data filenames	Filename of Input File 32
										Attributes - Input data filenames	Filename of Input File 33
										Attributes - Input data filenames	Filename of Input File 34
										Attributes - Input data filenames	Filename of Input File 35
										Attributes - Input data filenames	Filename of Input File 36
										Attributes - Input data filenames	Filename of Input File 37
										Attributes - Input data filenames	Filename of Input File 38
										Attributes - Input data filenames	Filename of Input File 39
										Attributes - Input data filenames	Filename of Input File 40
										Attributes - Input data filenames	Filename of Input File 41
										Attributes - Input data filenames	Filename of Input File 42
										Attributes - Input data filenames	Filename of Input File 43
										Attributes - Input data filenames	Filename of Input File 44
										Attributes - Input data filenames	Filename of Input File 45
										Attributes - Input data filenames	Filename of Input File 46
										Attributes - Input data filenames	Filename of Input File 47
										Attributes - Input data filenames	Filename of Input File 48
										Attributes - Input data filenames	Filename of Input File 49
										Attributes - Input data filenames	Filename of Input File 50
										Attributes - Input data filenames	Filename of Input File 51
										Attributes - Input data filenames	Filename of Input File 52
										Attributes - Input data filenames	Filename of Input File 53
										Attributes - Input data filenames	Filename of Input File 54
										Attributes - Input data filenames	Filename of Input File 55
										Attributes - Input data filenames	Filename of Input File 56
										Attributes - Input data filenames	Filename of Input File 57
										Attributes - Input data filenames	Filename of Input File 58
										Attributes - Input data filenames	Filename of Input File 59
										Attributes - Input data filenames	Filename of Input File 60
										Attributes - Input data filenames	Filename of Input File 61
										Attributes - Input data filenames	Filename of Input File 62
										Attributes - Input data filenames	Filename of Input File 63
										Attributes - Input data filenames	Filename of Input File 64
										Attributes - Input data filenames	Filename of Input File 65
										Attributes - Input data filenames	Filename of Input File 66
										Attributes - Input data filenames	Filename of Input File 67
										Attributes - Input data filenames	Filename of Input File 68
										Attributes - Input data filenames	Filename of Input File 69
										Attributes - Input data filenames	Filename of Input File 70
										Attributes - Input data filenames	Filename of Input File 71
										Attributes - Input data filenames	Filename of Input File 72
										Attributes - Input data filenames	Filename of Input File 73
										Attributes - Input data filenames	Filename of Input File 74
										Attributes - Input data filenames	Filename of Input File 75
										Attributes - Input data filenames	Filename of Input File 76
										Attributes - Input data filenames	Filename of Input File 77
										Attributes - Input data filenames	Filename of Input File 78
										Attributes - Input data filenames	Filename of Input File 79
										Attributes - Input data filenames	Filename of Input File 80
										Attributes - Input data filenames	Filename of Input File 81
										Attributes - Input data filenames	Filename of Input File 82
										Attributes - Input data filenames	Filename of Input File 83
										Attributes - Input data filenames	Filename of Input File 84
										Attributes - Input data filenames	Filename of Input File 85
										Attributes - Input data filenames	Filename of Input File 86
										Attributes - Input data filenames	Filename of Input File 87
										Attributes - Input data filenames	Filename of Input File 88
										Attributes - Input data filenames	Filename of Input File 89
										Attributes - Input data filenames	Filename of Input File 90
										Attributes - Input data filenames	Filename of Input File 91
										Attributes - Input data filenames	Filename of Input File 92
										Attributes - Input data filenames	Filename of Input File 93
										Attributes - Input data filenames	Filename of Input File 94
										Attributes - Input data filenames	Filename of Input File 95
										Attributes - Input data filenames	Filename of Input File 96
										Attributes - Input data filenames	Filename of Input File 97
										Attributes - Input data filenames	Filename of Input File 98
										Attributes - Input data filenames	Filename of Input File 99
										Attributes - Input data filenames	Filename of Input File 100
										Attributes - Input data filenames	Filename of Input File 101
										Attributes - Input data filenames	Filename of Input File 102
										Attributes - Input data filenames	Filename of Input File 103
										Attributes - Input data filenames	Filename of Input File 104
										Attributes - Input data filenames	Filename of Input File 105
										Attributes - Input data filenames	Filename of Input File 106
										Attributes - Input data filenames	Filename of Input File 107
										Attributes - Input data filenames	Filename of Input File 108
										Attributes - Input data filenames	Filename of Input File 109
										Attributes - Input data filenames	Filename of Input File 110
										Attributes - Input data filenames	Filename of Input File 111
										Attributes - Input data filenames	Filename of Input File 112
										Attributes - Input data filenames	Filename of Input File 113
										Attributes - Input data filenames	Filename of Input File 114
										Attributes - Input data filenames	Filename of Input File 115
										Attributes - Input data filenames	Filename of Input File 116
										Attributes - Input data filenames	Filename of Input File 117
										Attributes - Input data filenames	Filename of Input File 118
										Attributes - Input data filenames	Filename of Input File 119
										Attributes - Input data filenames	Filename of Input File 120
										Attributes - Input data filenames	Filename of Input File 121
										Attributes - Input data filenames	Filename of Input File 122
										Attributes - Input data filenames	Filename of Input File 123
										Attributes - Input data filenames	Filename of Input File 124
										Attributes - Input data filenames	Filename of Input File 125
										Attributes - Input data filenames	Filename of Input File 126
										Attributes - Input data filenames	Filename of Input File 127
										Attributes - Input data filenames	Filename of Input File 128
										Attributes - Input data filenames	Filename of Input File 129
										Attributes - Input data filenames	Filename of Input File 130
										Attributes - Input data filenames	Filename of Input File 131
										Attributes - Input data filenames	Filename of Input File 132
										Attributes - Input data filenames	Filename of Input File 133
										Attributes - Input data filenames	Filename of Input File 134
										Attributes - Input data filenames	Filename of Input File 135
										Attributes - Input data filenames	Filename of Input File 136
										Attributes - Input data filenames	Filename of Input File 137
										Attributes - Input data filenames	Filename of Input File 138
										Attributes - Input data filenames	Filename of Input File 139
										Attributes - Input data filenames	Filename of Input File 140
										Attributes - Input data filenames	Filename of Input File 141
										Attributes - Input data filenames	Filename of Input File 142
										Attributes - Input data filenames	Filename of Input File 143
										Attributes - Input data filenames	Filename of Input File 144
										Attributes - Input data filenames	Filename of Input File 145
										Attributes - Input data filenames	Filename of Input File 146
										Attributes - Input data filenames	Filename of Input File 147
										Attributes - Input data filenames	Filename of Input File 148
										Attributes - Input data filenames	Filename of Input File 149
										Attributes - Input data filenames	Filename of Input File 150
										Attributes - Input data filenames	Filename of Input File 151
										Attributes - Input data filenames	Filename of Input File 152
										Attributes - Input data filenames	Filename of Input File 153
										Attributes - Input data filenames	Filename of Input File 154
										Attributes - Input data filenames	Filename of Input File 155
										Attributes - Input data filenames	Filename of Input File 156
										Attributes - Input data filenames	Filename of Input File 157
										Attributes - Input data filenames	Filename of Input File 158
										Attributes - Input data filenames	Filename of Input File 159
										Attributes - Input data filenames	Filename of Input File 160
										Attributes - Input data filenames	Filename of Input File 161
										Attributes - Input data filenames	Filename of Input File 162
										Attributes - Input data filenames	Filename of Input File 163
										Attributes - Input data filenames	Filename of Input File 164
										Attributes - Input data filenames	Filename of Input File 165
										Attributes - Input data filenames	Filename of Input File 166
										Attributes - Input data filenames	Filename of Input File 167
										Attributes - Input data filenames	Filename of Input File 168
										Attributes - Input data filenames	Filename of Input File 169
										Attributes - Input data filenames	Filename of Input File 170
										Attributes - Input data filenames	Filename of Input File 171
										Attributes - Input data filenames	Filename of Input File 172
										Attributes - Input data filenames	Filename of Input File 173
										Attributes - Input data filenames	Filename of Input File 174
										Attributes - Input data filenames	Filename of Input File 175
										Attributes - Input data filenames	Filename of Input File 176
										Attributes - Input data filenames	Filename of Input File 177
										Attributes - Input data filenames	Filename of Input File 178
										Attributes - Input data filenames	Filename of Input File 179
										Attributes - Input data filenames	Filename of Input File 180
										Attributes - Input data filenames	Filename of Input File 181
										Attributes - Input data filenames	Filename of Input File 182
										Attributes - Input data filenames	Filename of Input File 183
										Attributes - Input data filenames	Filename of Input File 184
										Attributes - Input data filenames	Filename of Input File 185
										Attributes - Input data filenames	Filename of Input File 186
										Attributes - Input data filenames	Filename of Input File 187
										Attributes - Input data filenames	Filename of Input File 188
										Attributes - Input data filenames	Filename of Input File 189
										Attributes - Input data filenames	Filename of Input File 190
										Attributes - Input data filenames	Filename of Input File 191
										Attributes - Input data filenames	Filename of Input File 192
										Attributes - Input data filenames	Filename of Input File 193
										Attributes - Input data filenames	Filename of Input File 194
										Attributes - Input data filenames	Filename of Input File 195
										Attributes - Input data filenames	Filename of Input File 196
										Attributes - Input data filenames	Filename of Input File 197
										Attributes - Input data filenames	Filename of Input File 198
										Attributes - Input data filenames	Filename of Input File 199
										Attributes - Input data filenames	Filename of Input File 200

## Sheet: Protein Level Data
Protein Level Data	Unused ProtScore Threshold	Confidence Threshold	Forward	Reverse	Correct	Incorrect	Total	Global FDR	q-value	Fit Unused ProtScore Threshold	Fit Confidence Threshold	Fit Forward	Fit Reverse	Fit Correct	Fit Incorrect	Fit Total	Fit Global FDR	Fit Local FDR
	102.08	1	1	0	1	0	1	0	0	102.08	1	0.999974	2.5889e-05	0.999948	5.1778e-05	1	5.1778e-05	5.19536e-05
	71.49	1	2	0	2	0	2	0	0	71.49	1	1.99995	5.20408e-05	1.9999	0.000104082	2	5.20408e-05	5.23022e-05
	37.33	1	3	0	3	0	3	0	0	37.33	1	2.99992	7.85576e-05	2.99984	0.000157115	3	5.23717e-05	5.30292e-05
	31.75	1	4	0	4	0	4	0	0	31.75	1	3.99989	0.000105496	3.99979	0.000210992	4	5.27479e-05	5.38646e-05
	20.92	1	5	0	5	0	5	0	0	20.92	1	4.99987	0.000132998	4.99973	0.000265996	5	5.31992e-05	5.49844e-05
	17.08	1	6	0	6	0	6	0	0	17.08	1	5.99984	0.000161305	5.99968	0.00032261	6	5.37683e-05	5.65836e-05
	13.02	1	7	0	7	0	7	0	0	13.02	1	6.99981	0.00019079	6.99962	0.000381579	7	5.45113e-05	5.89233e-05
	12.51	1	8	0	8	0	8	0	0	12.51	1	7.99978	0.000222015	7.99956	0.00044403	8	5.55038e-05	6.23819e-05
	7.36	1	9	0	9	0	9	0	0	7.36	1	8.99974	0.000255828	8.99949	0.000511655	9	5.68506e-05	6.75209e-05
	7.25	1	10	0	10	0	10	0	0	7.25	1	9.99971	0.000293496	9.99941	0.000586991	10	5.86991e-05	7.51803e-05
	6.16	0.999999	11	0	11	0	11	0	0	6.16	0.999999	10.9997	0.000336922	10.9993	0.000673844	11	6.12585e-05	8.66193e-05
	5.8	0.999998	12	0	12	0	12	0	0	5.8	0.999998	11.9996	0.000388961	11.9992	0.000777922	12	6.48268e-05	0.000103728
	4	0.9999	13	0	13	0	13	0	0	4	0.9999	12.9995	0.000453896	12.9991	0.000907792	13	6.98301e-05	0.000129344
	3.72	0.999809	14	0	14	0	14	0	0	3.72	0.999809	13.9995	0.000538156	13.9989	0.00107631	14	7.68794e-05	0.00016773
	2.86	0.99862	15	0	15	0	15	0	0	2.86	0.99862	14.9993	0.000651396	14.9987	0.00130279	15	8.68528e-05	0.000225294
	2.64	0.997709	16	0	16	0	16	0	0	2.64	0.997709	15.9992	0.000808117	15.9984	0.00161623	16	0.000101015	0.00031166
	2.56	0.997246	17	0	17	0	17	0	0	2.56	0.997246	16.999	0.0010301	16.9979	0.00206021	17	0.000121189	0.000441296
	2.14	0.992756	18	0	18	0	18	0	0	2.14	0.992756	17.9986	0.00135008	17.9973	0.00270016	18	0.000150009	0.000635934
	2.07	0.991489	19	0	19	0	19	0	0	2.07	0.991489	18.9982	0.0018172	18.9964	0.00363441	19	0.000191285	0.000928209
	2.05	0.991087	20	0	20	0	20	0	0	2.05	0.991087	19.9975	0.00250528	19.995	0.00501056	20	0.000250528	0.00136709
	2.03	0.990667	21	0	21	0	21	0	0	2.03	0.990667	20.9965	0.00352504	20.9929	0.00705008	21	0.000335718	0.00202595
	2.01	0.990228	22	0	22	0	22	0	0	2.01	0.990228	21.995	0.00504244	21.9899	0.0100849	22	0.000458403	0.00301447
	2	0.99	29	0	29	0	29	0	0	2	0.99	22.9927	0.00730564	22.9854	0.0146113	23	0.000635273	0.0149396
	1.96	0.989035	29	1	28	2	30	0.0666667	0.0540541	2	0.99	23.9893	0.0106847	23.9786	0.0213694	24	0.000890393	0.0149396
	1.55	0.971816	30	1	29	2	31	0.0645161	0.0540541	2	0.99	24.9843	0.0157288	24.9685	0.0314576	25	0.0012583	0.0149396
	1.39	0.959262	31	1	30	2	32	0.0625	0.0540541	2	0.99	25.9768	0.0232471	25.9535	0.0464942	26	0.00178824	0.0149396
	1.38	0.958313	32	1	31	2	33	0.0606061	0.0540541	2	0.99	26.9656	0.0344192	26.9312	0.0688383	27	0.00254957	0.0149396
	1.15	0.929205	33	1	32	2	34	0.0588235	0.0540541	2	0.99	27.9491	0.0509371	27.8981	0.101874	28	0.00363836	0.0149396
	0.99	0.897671	34	1	33	2	35	0.0571429	0.0540541	2	0.99	28.9248	0.0751706	28.8497	0.150341	29	0.00518418	0.0149396
	0.67	0.786204	35	1	34	2	36	0.0555556	0.0540541	1.96	0.989035	29.8897	0.110323	29.7794	0.220647	30	0.0073549	0.0699621
	0.62	0.760117	36	1	35	2	37	0.0540541	0.0540541	1.55	0.971816	30.8395	0.160508	30.679	0.321015	31	0.0103553	0.0999562
	0.59	0.74296	36	2	34	4	38	0.105263	0.0909091	1.39	0.959262	31.7694	0.230613	31.5388	0.461227	32	0.0144133	0.13977
	0.58	0.736973	37	2	35	4	39	0.102564	0.0909091	1.38	0.958313	32.6742	0.325841	32.3483	0.651681	33	0.0197479	0.190057
	0.56	0.724577	38	2	36	4	40	0.1	0.0909091	1.15	0.929205	33.5492	0.450834	33.0983	0.901668	34	0.0265196	0.249726
	0.49	0.676406	39	2	37	4	41	0.097561	0.0909091	0.99	0.897671	34.3914	0.608608	33.7828	1.21722	35	0.0347776	0.315502
	0.47	0.661156	40	2	38	4	42	0.0952381	0.0909091	0.67	0.786204	35.2003	0.799703	34.4006	1.59941	36	0.044428	0.382372
	0.42	0.619811	41	2	39	4	43	0.0930233	0.0909091	0.62	0.760117	35.978	1.02202	34.956	2.04405	37	0.0552445	0.444993
	0.4	0.601893	42	2	40	4	44	0.0909091	0.0909091	0.59	0.74296	36.7286	1.27145	35.4571	2.54289	38	0.0669182	0.499281
	0.36	0.563484	43	3	40	6	46	0.130435	0.130435	0.58	0.736973	37.4571	1.54288	35.9142	3.08575	39	0.0791219	0.54329
	0.35	0.553316	45	4	41	8	49	0.163265	0.163265	0.56	0.724577	38.1688	1.83122	36.3376	3.66245	40	0.0915612	0.577069
	0.32	0.52137	45	5	40	10	50	0.2	0.196078	0.49	0.676406	38.868	2.13204	36.7359	4.26408	41	0.104002	0.601929
	0.28	0.475193	46	5	41	10	51	0.196078	0.196078	0.47	0.661156	39.5582	2.44176	37.1165	4.88353	42	0.116274	0.619668
	0.26	0.450459	46	7	39	14	53	0.264151	0.254545	0.42	0.619811	40.2423	2.75771	37.4846	5.51542	43	0.128266	0.632053
	0.24	0.42456	47	7	40	14	54	0.259259	0.254545	0.4	0.601893	40.9221	3.07794	37.8441	6.15588	44	0.139906	0.640573
	0.23	0.411156	48	7	41	14	55	0.254545	0.254545	0.36	0.563484	41.5989	3.40109	38.1978	6.80218	45	0.15116	0.648539
	0.22	0.39744	49	8	41	16	57	0.280702	0.275862	0.36	0.563484	42.2738	3.72622	38.5476	7.45244	46	0.16201	0.648539
	0.21	0.383405	50	8	42	16	58	0.275862	0.275862	0.35	0.553316	42.9473	4.05269	38.8946	8.10538	47	0.172455	0.654775
	0.2	0.369043	51	9	42	18	60	0.3	0.3	0.35	0.553316	43.6199	4.38007	39.2399	8.76013	48	0.182503	0.654775
	0.19	0.354346	52	10	42	20	62	0.322581	0.322581	0.35	0.553316	44.2919	4.70806	39.5839	9.41611	49	0.192166	0.654775
	0.18	0.339307	52	11	41	22	63	0.349206	0.34375	0.32	0.52137	44.9635	5.03647	39.9271	10.0729	50	0.201459	0.656829
	0.16	0.308169	53	11	42	22	64	0.34375	0.34375	0.28	0.475193	45.6348	5.36516	40.2697	10.7303	51	0.210399	0.657402
	0.15	0.292054	53	13	40	26	66	0.393939	0.376812	0.26	0.450459	46.3059	5.69406	40.6119	11.3881	52	0.219002	0.657954
	0.14	0.275564	56	13	43	26	69	0.376812	0.376812	0.26	0.450459	46.9769	6.0231	40.9538	12.0462	53	0.227287	0.657954
	0.13	0.25869	57	14	43	28	71	0.394366	0.383562	0.24	0.42456	47.6478	6.35224	41.2955	12.7045	54	0.235268	0.658287
	0.12	0.241422	59	14	45	28	73	0.383562	0.383562	0.23	0.411156	48.3185	6.68146	41.6371	13.3629	55	0.242962	0.658439
	0.11	0.223753	60	15	45	30	75	0.4	0.4	0.22	0.39744	48.9893	7.01074	41.9785	14.0215	56	0.250384	0.658602
	0.1	0.205672	60	17	43	34	77	0.441558	0.430108	0.22	0.39744	49.6599	7.34006	42.3199	14.6801	57	0.257546	0.658602
	0.09	0.187169	60	18	42	36	78	0.461538	0.430108	0.21	0.383405	50.3306	7.66942	42.6612	15.3388	58	0.264463	0.658719
	0.08	0.168236	65	18	47	36	83	0.433735	0.430108	0.2	0.369043	51.0012	7.99881	43.0024	15.9976	59	0.271146	0.658808
	0.07	0.148862	69	20	49	40	89	0.449438	0.430108	0.2	0.369043	51.6718	8.32823	43.3435	16.6565	60	0.277608	0.658808
	0.06	0.129036	73	20	53	40	93	0.430108	0.430108	0.19	0.354346	52.3423	8.65767	43.6847	17.3153	61	0.283858	0.658903
	0.05	0.108749	93	27	66	54	120	0.45	0.45	0.19	0.354346	53.0129	8.98713	44.0257	17.9743	62	0.289907	0.658903
										0.18	0.339307	53.6834	9.31661	44.3668	18.6332	63	0.295765	0.658963
										0.16	0.308169	54.3539	9.64611	44.7078	19.2922	64	0.301441	0.658999
										0.15	0.292054	55.0244	9.97563	45.0487	19.9513	65	0.306942	0.659049
										0.15	0.292054	55.6948	10.3052	45.3897	20.6103	66	0.312278	0.659049
										0.14	0.275564	56.3653	10.6347	45.7306	21.2694	67	0.317454	0.659123
										0.14	0.275564	57.0357	10.9643	46.0715	21.9285	68	0.322478	0.659123
										0.14	0.275564	57.7062	11.2938	46.4123	22.5877	69	0.327358	0.659123
										0.13	0.25869	58.3766	11.6234	46.7531	23.2469	70	0.332098	0.659189
										0.13	0.25869	59.047	11.953	47.0939	23.9061	71	0.336705	0.659189
										0.12	0.241422	59.7174	12.2826	47.4347	24.5653	72	0.341185	0.659237
										0.12	0.241422	60.3877	12.6123	47.7755	25.2245	73	0.345542	0.659237
										0.11	0.223753	61.0581	12.9419	48.1162	25.8838	74	0.349781	0.65928
										0.11	0.223753	61.7285	13.2715	48.4569	26.5431	75	0.353908	0.65928
										0.1	0.205672	62.3988	13.6012	48.7976	27.2024	76	0.357926	0.659321
										0.1	0.205672	63.0691	13.9309	49.1383	27.8617	77	0.361841	0.659321
										0.09	0.187169	63.7395	14.2605	49.4789	28.5211	78	0.365655	0.659349
										0.08	0.168236	64.4098	14.5902	49.8195	29.1805	79	0.369373	0.659401
										0.08	0.168236	65.0801	14.9199	50.1602	29.8398	80	0.372998	0.659401
										0.08	0.168236	65.7504	15.2496	50.5008	30.4992	81	0.376534	0.659401
										0.08	0.168236	66.4207	15.5793	50.8413	31.1587	82	0.379984	0.659401
										0.08	0.168236	67.091	15.909	51.1819	31.8181	83	0.38335	0.659401
										0.07	0.148862	67.7612	16.2388	51.5225	32.4775	84	0.386637	0.659483
										0.07	0.148862	68.4315	16.5685	51.863	33.137	85	0.389847	0.659483
										0.07	0.148862	69.1018	16.8982	52.2035	33.7965	86	0.392982	0.659483
										0.07	0.148862	69.772	17.228	52.544	34.456	87	0.396046	0.659483
										0.07	0.148862	70.4423	17.5577	52.8845	35.1155	88	0.399039	0.659483
										0.07	0.148862	71.1125	17.8875	53.225	35.775	89	0.401966	0.659483
										0.06	0.129036	71.7827	18.2173	53.5655	36.4345	90	0.404828	0.659544
										0.06	0.129036	72.453	18.547	53.906	37.094	91	0.407627	0.659544
										0.06	0.129036	73.1232	18.8768	54.2464	37.7536	92	0.410365	0.659544
										0.06	0.129036	73.7934	19.2066	54.5868	38.4132	93	0.413045	0.659544
										0.05	0.108749	74.4636	19.5364	54.9273	39.0727	94	0.415667	0.659685
										0.05	0.108749	75.1338	19.8662	55.2677	39.7323	95	0.418235	0.659685
										0.05	0.108749	75.804	20.196	55.6081	40.3919	96	0.420749	0.659685
										0.05	0.108749	76.4742	20.5258	55.9485	41.0515	97	0.423211	0.659685
										0.05	0.108749	77.1444	20.8556	56.2889	41.7111	98	0.425624	0.659685
										0.05	0.108749	77.8146	21.1854	56.6293	42.3707	99	0.427987	0.659685
										0.05	0.108749	78.4848	21.5152	56.9696	43.0304	100	0.430304	0.659685
										0.05	0.108749	79.155	21.845	57.31	43.69	101	0.432574	0.659685
										0.05	0.108749	79.8252	22.1748	57.6504	44.3496	102	0.4348	0.659685
										0.05	0.108749	80.4953	22.5047	57.9907	45.0093	103	0.436984	0.659685
										0.05	0.108749	81.1655	22.8345	58.331	45.669	104	0.439125	0.659685
										0.05	0.108749	81.8357	23.1643	58.6714	46.3286	105	0.441225	0.659685
										0.05	0.108749	82.5058	23.4942	59.0117	46.9883	106	0.443286	0.659685
										0.05	0.108749	83.176	23.824	59.352	47.648	107	0.445308	0.659685
										0.05	0.108749	83.8462	24.1538	59.6923	48.3077	108	0.447293	0.659685
										0.05	0.108749	84.5163	24.4837	60.0326	48.9674	109	0.449242	0.659685
										0.05	0.108749	85.1865	24.8135	60.3729	49.6271	110	0.451155	0.659685
										0.05	0.108749	85.8566	25.1434	60.7132	50.2868	111	0.453034	0.659685
										0.05	0.108749	86.5267	25.4733	61.0535	50.9465	112	0.45488	0.659685
										0.05	0.108749	87.1969	25.8031	61.3938	51.6062	113	0.456692	0.659685
										0.05	0.108749	87.867	26.133	61.734	52.266	114	0.458473	0.659685
										0.05	0.108749	88.5371	26.4629	62.0743	52.9257	115	0.460224	0.659685
										0.05	0.108749	89.2073	26.7927	62.4145	53.5855	116	0.461944	0.659685
										0.05	0.108749	89.8774	27.1226	62.7548	54.2452	117	0.463634	0.659685
										0.05	0.108749	90.5475	27.4525	63.095	54.905	118	0.465296	0.659685
										0.05	0.108749	91.2176	27.7824	63.4353	55.5647	119	0.46693	0.659685
										0.05	0.108749	91.8878	28.1122	63.7755	56.2245	120	0.468537	0.659685

## Sheet: Distinct Peptide Level Data
Distinct Peptide Level Data		Confidence Threshold	Forward	Reverse	Correct	Incorrect	Total	Global FDR	q-value		Fit Confidence Threshold	Fit Forward	Fit Reverse	Fit Correct	Fit Incorrect	Fit Total	Fit Global FDR	Fit Local FDR
		1	72	0	72	0	72	0	0		1	0.999954	4.6221e-05	0.999908	9.24421e-05	1	9.24421e-05	9.28429e-05
		0.9999	74	0	74	0	74	0	0		1	1.99991	9.24465e-05	1.99982	0.000184893	2	9.24465e-05	9.28429e-05
		0.9997	75	0	75	0	75	0	0		1	2.99986	0.000138676	2.99972	0.000277353	3	9.24509e-05	9.28429e-05
		0.9996	76	0	76	0	76	0	0		1	3.99982	0.00018491	3.99963	0.000369821	4	9.24552e-05	9.28429e-05
		0.9987	140	0	140	0	140	0	0		1	4.99977	0.000231149	4.99954	0.000462298	5	9.24596e-05	9.28429e-05
		0.9979	167	0	167	0	167	0	0		1	5.99972	0.000277392	5.99945	0.000554784	6	9.2464e-05	9.28429e-05
		0.9978	168	0	168	0	168	0	0		1	6.99968	0.000323639	6.99935	0.000647279	7	9.24684e-05	9.28429e-05
		0.9969	169	0	169	0	169	0	0		1	7.99963	0.000369891	7.99926	0.000739783	8	9.24728e-05	9.28429e-05
		0.9968	172	0	172	0	172	0	0		1	8.99958	0.000416147	8.99917	0.000832295	9	9.24772e-05	9.28429e-05
		0.9961	172	1	171	2	173	0.0115607	0.00892857		1	9.99954	0.000462408	9.99908	0.000924816	10	9.24816e-05	9.28429e-05
		0.9938	176	1	175	2	177	0.0112994	0.00892857		1	10.9995	0.000508673	10.999	0.00101735	11	9.2486e-05	9.28429e-05
		0.9921	178	1	177	2	179	0.0111732	0.00892857		1	11.9994	0.000554942	11.9989	0.00110988	12	9.24904e-05	9.28429e-05
		0.9904	182	1	181	2	183	0.010929	0.00892857		1	12.9994	0.000601216	12.9988	0.00120243	13	9.24948e-05	9.28429e-05
		0.9898	183	1	182	2	184	0.0108696	0.00892857		1	13.9994	0.000647494	13.9987	0.00129499	14	9.24992e-05	9.28429e-05
		0.9884	184	1	183	2	185	0.0108108	0.00892857		1	14.9993	0.000693777	14.9986	0.00138755	15	9.25036e-05	9.28429e-05
		0.9878	185	1	184	2	186	0.0107527	0.00892857		1	15.9993	0.000740064	15.9985	0.00148013	16	9.2508e-05	9.28429e-05
		0.9864	186	1	185	2	187	0.0106952	0.00892857		1	16.9992	0.000786355	16.9984	0.00157271	17	9.25124e-05	9.28429e-05
		0.9859	187	1	186	2	188	0.0106383	0.00892857		1	17.9992	0.000832651	17.9983	0.0016653	18	9.25168e-05	9.28429e-05
		0.9843	188	1	187	2	189	0.010582	0.00892857		1	18.9991	0.000878951	18.9982	0.0017579	19	9.25212e-05	9.28429e-05
		0.9831	190	1	189	2	191	0.0104712	0.00892857		1	19.9991	0.000925256	19.9981	0.00185051	20	9.25256e-05	9.28429e-05
		0.983	191	1	190	2	192	0.0104167	0.00892857		1	20.999	0.000971565	20.9981	0.00194313	21	9.253e-05	9.28429e-05
		0.9811	192	1	191	2	193	0.0103627	0.00892857		1	21.999	0.00101788	21.998	0.00203576	22	9.25344e-05	9.28429e-05
		0.9795	193	1	192	2	194	0.0103093	0.00892857		1	22.9989	0.0010642	22.9979	0.00212839	23	9.25388e-05	9.28429e-05
		0.9786	195	1	194	2	196	0.0102041	0.00892857		1	23.9989	0.00111052	23.9978	0.00222104	24	9.25432e-05	9.28429e-05
		0.9785	196	1	195	2	197	0.0101523	0.00892857		1	24.9988	0.00115684	24.9977	0.00231369	25	9.25476e-05	9.28429e-05
		0.9751	197	1	196	2	198	0.010101	0.00892857		1	25.9988	0.00120318	25.9976	0.00240635	26	9.2552e-05	9.28429e-05
		0.9747	198	1	197	2	199	0.0100503	0.00892857		1	26.9988	0.00124951	26.9975	0.00249902	27	9.25564e-05	9.28429e-05
		0.9743	202	1	201	2	203	0.00985222	0.00892857		1	27.9987	0.00129585	27.9974	0.0025917	28	9.25608e-05	9.28429e-05
		0.971	203	1	202	2	204	0.00980392	0.00892857		1	28.9987	0.0013422	28.9973	0.00268439	29	9.25652e-05	9.28429e-05
		0.9705	204	1	203	2	205	0.0097561	0.00892857		1	29.9986	0.00138855	29.9972	0.00277709	30	9.25697e-05	9.28429e-05
		0.9704	205	1	204	2	206	0.00970874	0.00892857		1	30.9986	0.0014349	30.9971	0.0028698	31	9.25743e-05	9.28429e-05
		0.9702	206	1	205	2	207	0.00966184	0.00892857		1	31.9985	0.00148126	31.997	0.00296253	32	9.25789e-05	9.28429e-05
		0.9691	208	1	207	2	209	0.00956938	0.00892857		1	32.9985	0.00152763	32.9969	0.00305527	33	9.25838e-05	9.28429e-05
		0.9681	209	1	208	2	210	0.00952381	0.00892857		1	33.9984	0.00157401	33.9969	0.00314802	34	9.25889e-05	9.28429e-05
		0.9677	210	1	209	2	211	0.00947867	0.00892857		1	34.9984	0.0016204	34.9968	0.00324081	35	9.25946e-05	9.28429e-05
		0.9672	211	1	210	2	212	0.00943396	0.00892857		1	35.9983	0.00166682	35.9967	0.00333363	36	9.26009e-05	9.28429e-05
		0.9652	212	1	211	2	213	0.00938967	0.00892857		1	36.9983	0.00171325	36.9966	0.0034265	37	9.26081e-05	9.28429e-05
		0.965	213	1	212	2	214	0.00934579	0.00892857		1	37.9982	0.00175972	37.9965	0.00351944	38	9.26168e-05	9.28429e-05
		0.9644	214	1	213	2	215	0.00930233	0.00892857		1	38.9982	0.00180623	38.9964	0.00361247	39	9.26273e-05	9.28429e-05
		0.9632	215	1	214	2	216	0.00925926	0.00892857		1	39.9981	0.00185281	39.9963	0.00370562	40	9.26405e-05	9.28429e-05
		0.9631	216	1	215	2	217	0.00921659	0.00892857		1	40.9981	0.00189947	40.9962	0.00379894	41	9.26571e-05	9.28429e-05
		0.9607	217	1	216	2	218	0.00917431	0.00892857		1	41.9981	0.00194624	41.9961	0.00389249	42	9.26783e-05	9.28429e-05
		0.9583	218	1	217	2	219	0.00913242	0.00892857		1	42.998	0.00199317	42.996	0.00398633	43	9.27054e-05	9.28429e-05
		0.9557	219	1	218	2	220	0.00909091	0.00892857		1	43.998	0.00204028	43.9959	0.00408056	44	9.27399e-05	9.28429e-05
		0.9529	221	1	220	2	222	0.00900901	0.00892857		1	44.9979	0.00208764	44.9958	0.00417527	45	9.27838e-05	9.28429e-05
		0.9515	222	1	221	2	223	0.00896861	0.00892857		1	45.9979	0.00213531	45.9957	0.00427061	46	9.28394e-05	9.28429e-05
		0.95	223	1	222	2	224	0.00892857	0.00892857		1	46.9978	0.00218337	46.9956	0.00436673	47	9.29092e-05	9.28429e-05
		0.9482	223	2	221	4	225	0.0177778	0.0163934		1	47.9978	0.00223191	47.9955	0.00446383	48	9.29964e-05	9.28429e-05
		0.9475	225	2	223	4	227	0.0176211	0.0163934		1	48.9977	0.00228106	48.9954	0.00456212	49	9.31044e-05	9.28429e-05
		0.947	226	2	224	4	228	0.0175439	0.0163934		1	49.9977	0.00233093	49.9953	0.00466186	50	9.32372e-05	9.28429e-05
		0.9453	227	2	225	4	229	0.0174672	0.0163934		1	50.9976	0.00238168	50.9952	0.00476336	51	9.33993e-05	9.28429e-05
		0.9436	228	2	226	4	230	0.0173913	0.0163934		1	51.9976	0.00243349	51.9951	0.00486697	52	9.35957e-05	9.28429e-05
		0.9433	230	2	228	4	232	0.0172414	0.0163934		1	52.9975	0.00248654	52.995	0.00497309	53	9.38318e-05	9.28429e-05
		0.9431	231	2	229	4	233	0.0171674	0.0163934		1	53.9975	0.00254107	53.9949	0.00508215	54	9.41138e-05	9.28429e-05
		0.9401	232	2	230	4	234	0.017094	0.0163934		1	54.9974	0.00259733	54.9948	0.00519466	55	9.44484e-05	9.28429e-05
		0.9397	233	2	231	4	235	0.0170213	0.0163934		1	55.9973	0.0026556	55.9947	0.0053112	56	9.48428e-05	9.28429e-05
		0.9375	234	2	232	4	236	0.0169492	0.0163934		1	56.9973	0.00271619	56.9946	0.00543237	57	9.53048e-05	9.28429e-05
		0.9364	235	2	233	4	237	0.0168776	0.0163934		1	57.9972	0.00277944	57.9944	0.00555888	58	9.58428e-05	9.28429e-05
		0.9332	236	2	234	4	238	0.0168067	0.0163934		1	58.9972	0.00284574	58.9943	0.00569149	59	9.64659e-05	9.28429e-05
		0.9303	237	2	235	4	239	0.0167364	0.0163934		1	59.9971	0.00291551	59.9942	0.00583102	60	9.71837e-05	9.28429e-05
		0.9282	238	2	236	4	240	0.0166667	0.0163934		1	60.997	0.00298919	60.994	0.00597838	61	9.80063e-05	9.28429e-05
		0.9276	240	2	238	4	242	0.0165289	0.0163934		1	61.9969	0.00306728	61.9939	0.00613455	62	9.89444e-05	9.28429e-05
		0.926	241	2	239	4	243	0.0164609	0.0163934		1	62.9968	0.0031503	62.9937	0.00630059	63	0.000100009	9.28429e-05
		0.9246	242	2	240	4	244	0.0163934	0.0163934		1	63.9968	0.00323882	63.9935	0.00647764	64	0.000101213	9.28429e-05
		0.9238	242	3	239	6	245	0.0244898	0.0241935		1	64.9967	0.00333345	64.9933	0.00666691	65	0.000102568	9.28429e-05
		0.9191	243	3	240	6	246	0.0243902	0.0241935		1	65.9966	0.00343485	65.9931	0.0068697	66	0.000104086	9.28429e-05
		0.9176	244	3	241	6	247	0.0242915	0.0241935		1	66.9965	0.00354369	66.9929	0.00708739	67	0.000105782	9.28429e-05
		0.9173	245	3	242	6	248	0.0241935	0.0241935		1	67.9963	0.00366072	67.9927	0.00732145	68	0.000107668	9.28429e-05
		0.9141	246	4	242	8	250	0.032	0.032		1	68.9962	0.00378671	68.9924	0.00757342	69	0.00010976	9.28429e-05
		0.912	246	5	241	10	251	0.0398406	0.0387597		1	69.9961	0.00392247	69.9922	0.00784494	70	0.000112071	9.28429e-05
		0.9093	247	5	242	10	252	0.0396825	0.0387597		1	70.9959	0.00406886	70.9919	0.00813773	71	0.000114616	9.28429e-05
		0.9084	248	5	243	10	253	0.0395257	0.0387597		1	71.9958	0.00422678	71.9915	0.00845357	72	0.000117411	9.28429e-05
		0.9032	249	5	244	10	254	0.0393701	0.0387597		0.9999	72.9956	0.00439717	72.9912	0.00879434	73	0.00012047	0.000353893
		0.899	250	5	245	10	255	0.0392157	0.0387597		0.9999	73.9954	0.00458101	73.9908	0.00916202	74	0.000123811	0.000353893
		0.8973	251	5	246	10	256	0.0390625	0.0387597		0.9997	74.9952	0.00477932	74.9904	0.00955863	75	0.000127448	0.000396525
		0.8931	252	5	247	10	257	0.0389105	0.0387597		0.9996	75.995	0.00499315	75.99	0.0099863	76	0.000131399	0.00042758
		0.8924	253	5	248	10	258	0.0387597	0.0387597		0.9987	76.9948	0.00522362	76.9896	0.0104472	77	0.000135678	0.00299908
		0.891	254	6	248	12	260	0.0461538	0.0444444		0.9987	77.9945	0.00547185	77.9891	0.0109437	78	0.000140304	0.00299908
		0.8877	255	6	249	12	261	0.045977	0.0444444		0.9987	78.9943	0.00573902	78.9885	0.011478	79	0.000145292	0.00299908
		0.8844	256	6	250	12	262	0.0458015	0.0444444		0.9987	79.994	0.00602634	79.9879	0.0120527	80	0.000150658	0.00299908
		0.879	257	6	251	12	263	0.0456274	0.0444444		0.9987	80.9937	0.00633506	80.9873	0.0126701	81	0.000156421	0.00299908
		0.8774	258	6	252	12	264	0.0454545	0.0444444		0.9987	81.9933	0.00666646	81.9867	0.0133329	82	0.000162597	0.00299908
		0.8755	259	6	253	12	265	0.045283	0.0444444		0.9987	82.993	0.00702186	82.986	0.0140437	83	0.000169201	0.00299908
		0.8701	260	6	254	12	266	0.0451128	0.0444444		0.9987	83.9926	0.0074026	83.9852	0.0148052	84	0.000176252	0.00299908
		0.8694	261	6	255	12	267	0.0449438	0.0444444		0.9987	84.9922	0.00781008	84.9844	0.0156202	85	0.000183766	0.00299908
		0.8623	262	6	256	12	268	0.0447761	0.0444444		0.9987	85.9918	0.00824569	85.9835	0.0164914	86	0.00019176	0.00299908
		0.8603	263	6	257	12	269	0.0446097	0.0444444		0.9987	86.9913	0.00871089	86.9826	0.0174218	87	0.00020025	0.00299908
		0.8583	264	6	258	12	270	0.0444444	0.0444444		0.9987	87.9908	0.00920715	87.9816	0.0184143	88	0.000209253	0.00299908
		0.8576	264	7	257	14	271	0.0516605	0.0503597		0.9987	88.9903	0.00973596	88.9805	0.0194719	89	0.000218786	0.00299908
		0.8555	265	7	258	14	272	0.0514706	0.0503597		0.9987	89.9897	0.0102989	89.9794	0.0205977	90	0.000228864	0.00299908
		0.8542	266	7	259	14	273	0.0512821	0.0503597		0.9987	90.9891	0.0108974	90.9782	0.0217948	91	0.000239504	0.00299908
		0.85	267	7	260	14	274	0.0510949	0.0503597		0.9987	91.9885	0.0115332	91.9769	0.0230664	92	0.000250722	0.00299908
		0.8458	268	7	261	14	275	0.0509091	0.0503597		0.9987	92.9878	0.0122078	92.9756	0.0244156	93	0.000262534	0.00299908
		0.8457	269	7	262	14	276	0.0507246	0.0503597		0.9987	93.9871	0.0129229	93.9742	0.0258458	94	0.000274955	0.00299908
		0.8444	270	7	263	14	277	0.0505415	0.0503597		0.9987	94.9863	0.0136801	94.9726	0.0273602	95	0.000288002	0.00299908
		0.844	271	7	264	14	278	0.0503597	0.0503597		0.9987	95.9855	0.0144811	95.971	0.0289623	96	0.00030169	0.00299908
		0.8392	271	8	263	16	279	0.0573477	0.052459		0.9987	96.9847	0.0153277	96.9693	0.0306553	97	0.000316034	0.00299908
		0.8367	272	8	264	16	280	0.0571429	0.052459		0.9987	97.9838	0.0162214	97.9676	0.0324429	98	0.00033105	0.00299908
		0.8362	273	8	265	16	281	0.0569395	0.052459		0.9987	98.9828	0.0171642	98.9657	0.0343284	99	0.000346752	0.00299908
		0.8327	274	8	266	16	282	0.0567376	0.052459		0.9987	99.9818	0.0181577	99.9637	0.0363155	100	0.000363155	0.00299908
		0.832	275	8	267	16	283	0.0565371	0.052459		0.9987	100.981	0.0192038	100.962	0.0384077	101	0.000380274	0.00299908
		0.8309	276	8	268	16	284	0.056338	0.052459		0.9987	101.98	0.0203043	101.959	0.0406086	102	0.000398123	0.00299908
		0.8289	277	8	269	16	285	0.0561404	0.052459		0.9987	102.979	0.021461	102.957	0.0429219	103	0.000416718	0.00299908
		0.8273	278	8	270	16	286	0.0559441	0.052459		0.9987	103.977	0.0226757	103.955	0.0453514	104	0.000436071	0.00299908
		0.8203	279	8	271	16	287	0.0557491	0.052459		0.9987	104.976	0.0239504	104.952	0.0479007	105	0.000456198	0.00299908
		0.8175	280	8	272	16	288	0.0555556	0.052459		0.9987	105.975	0.0252869	105.949	0.0505738	106	0.000477111	0.00299908
		0.8147	281	8	273	16	289	0.0553633	0.052459		0.9987	106.973	0.0266872	106.947	0.0533744	107	0.000498826	0.00299908
		0.8124	282	8	274	16	290	0.0551724	0.052459		0.9987	107.972	0.0281532	107.944	0.0563065	108	0.000521356	0.00299908
		0.8072	284	8	276	16	292	0.0547945	0.052459		0.9987	108.97	0.0296869	108.941	0.0593739	109	0.000544715	0.00299908
		0.8019	285	8	277	16	293	0.0546075	0.052459		0.9987	109.969	0.0312903	109.937	0.0625807	110	0.000568915	0.00299908
		0.7984	286	8	278	16	294	0.0544218	0.052459		0.9987	110.967	0.0329654	110.934	0.0659308	111	0.000593972	0.00299908
		0.7854	287	8	279	16	295	0.0542373	0.052459		0.9987	111.965	0.0347142	111.931	0.0694285	112	0.000619897	0.00299908
		0.781	288	8	280	16	296	0.0540541	0.052459		0.9987	112.963	0.0365388	112.927	0.0730777	113	0.000646705	0.00299908
		0.7796	289	8	281	16	297	0.0538721	0.052459		0.9987	113.962	0.0384413	113.923	0.0768826	114	0.000674409	0.00299908
		0.7787	290	8	282	16	298	0.0536913	0.052459		0.9987	114.96	0.0404238	114.919	0.0808476	115	0.000703022	0.00299908
		0.7738	291	8	283	16	299	0.0535117	0.052459		0.9987	115.958	0.0424884	115.915	0.0849768	116	0.000732558	0.00299908
		0.7716	292	8	284	16	300	0.0533333	0.052459		0.9987	116.955	0.0446373	116.911	0.0892746	117	0.000763031	0.00299908
		0.7692	293	8	285	16	301	0.0531561	0.052459		0.9987	117.953	0.0468727	117.906	0.0937454	118	0.000794453	0.00299908
		0.7633	294	8	286	16	302	0.0529801	0.052459		0.9987	118.951	0.0491968	118.902	0.0983937	119	0.000826838	0.00299908
		0.7624	295	8	287	16	303	0.0528053	0.052459		0.9987	119.948	0.0516119	119.897	0.103224	120	0.000860199	0.00299908
		0.7618	296	8	288	16	304	0.0526316	0.052459		0.9987	120.946	0.0541203	120.892	0.108241	121	0.000894551	0.00299908
		0.7494	297	8	289	16	305	0.052459	0.052459		0.9987	121.943	0.0567243	121.887	0.113449	122	0.000929906	0.00299908
		0.7472	297	9	288	18	306	0.0588235	0.0580645		0.9987	122.941	0.0594262	122.881	0.118852	123	0.00096628	0.00299908
		0.7447	298	9	289	18	307	0.0586319	0.0580645		0.9987	123.938	0.0622284	123.876	0.124457	124	0.00100368	0.00299908
		0.7366	299	9	290	18	308	0.0584416	0.0580645		0.9987	124.935	0.0651335	124.87	0.130267	125	0.00104214	0.00299908
		0.7362	300	9	291	18	309	0.0582524	0.0580645		0.9987	125.932	0.0681437	125.864	0.136287	126	0.00108165	0.00299908
		0.7303	301	9	292	18	310	0.0580645	0.0580645		0.9987	126.929	0.0712617	126.857	0.142523	127	0.00112223	0.00299908
		0.7132	301	10	291	20	311	0.0643087	0.0641026		0.9987	127.926	0.07449	127.851	0.14898	128	0.00116391	0.00299908
		0.7128	302	10	292	20	312	0.0641026	0.0641026		0.9987	128.922	0.0778311	128.844	0.155662	129	0.00120668	0.00299908
		0.7098	302	11	291	22	313	0.0702875	0.0702875		0.9987	129.919	0.0812878	129.837	0.162576	130	0.00125058	0.00299908
		0.7086	302	12	290	24	314	0.0764331	0.0754717		0.9987	130.915	0.0848627	130.83	0.169725	131	0.00129561	0.00299908
		0.7029	303	12	291	24	315	0.0761905	0.0754717		0.9987	131.911	0.0885586	131.823	0.177117	132	0.0013418	0.00299908
		0.7	304	12	292	24	316	0.0759494	0.0754717		0.9987	132.908	0.0923782	132.815	0.184756	133	0.00138915	0.00299908
		0.6945	305	12	293	24	317	0.0757098	0.0754717		0.9987	133.904	0.0963243	133.807	0.192649	134	0.00143768	0.00299908
		0.6891	306	12	294	24	318	0.0754717	0.0754717		0.9987	134.9	0.1004	134.799	0.2008	135	0.00148741	0.00299908
		0.6825	306	13	293	26	319	0.0815047	0.08125		0.9987	135.895	0.104608	135.791	0.209216	136	0.00153835	0.00299908
		0.6816	307	13	294	26	320	0.08125	0.08125		0.9987	136.891	0.108951	136.782	0.217903	137	0.00159053	0.00299908
		0.6801	307	14	293	28	321	0.0872274	0.0869565		0.9987	137.887	0.113433	137.773	0.226867	138	0.00164396	0.00299908
		0.6755	308	14	294	28	322	0.0869565	0.0869565		0.9987	138.882	0.118057	138.764	0.236114	139	0.00169866	0.00299908
		0.6718	308	15	293	30	323	0.0928793	0.0917431		0.9987	139.877	0.122825	139.754	0.24565	140	0.00175465	0.00299908
		0.6713	309	15	294	30	324	0.0925926	0.0917431		0.9979	140.872	0.127742	140.745	0.255483	141	0.00181194	0.0143499
		0.667	310	15	295	30	325	0.0923077	0.0917431		0.9979	141.867	0.13281	141.734	0.265619	142	0.00187056	0.0143499
		0.6522	311	15	296	30	326	0.0920245	0.0917431		0.9979	142.862	0.138032	142.724	0.276065	143	0.00193052	0.0143499
		0.6518	312	15	297	30	327	0.0917431	0.0917431		0.9979	143.857	0.143414	143.713	0.286827	144	0.00199185	0.0143499
		0.6372	312	16	296	32	328	0.097561	0.0966767		0.9979	144.851	0.148957	144.702	0.297913	145	0.00205457	0.0143499
		0.6357	313	16	297	32	329	0.0972644	0.0966767		0.9979	145.845	0.154665	145.691	0.30933	146	0.0021187	0.0143499
		0.6219	314	16	298	32	330	0.0969697	0.0966767		0.9979	146.839	0.160543	146.679	0.321086	147	0.00218426	0.0143499
		0.615	315	16	299	32	331	0.0966767	0.0966767		0.9979	147.833	0.166594	147.667	0.333188	148	0.00225127	0.0143499
		0.6088	315	17	298	34	332	0.10241	0.100592		0.9979	148.827	0.172822	148.654	0.345644	149	0.00231976	0.0143499
		0.6065	316	17	299	34	333	0.102102	0.100592		0.9979	149.821	0.179231	149.642	0.358462	150	0.00238975	0.0143499
		0.6037	317	17	300	34	334	0.101796	0.100592		0.9979	150.814	0.185825	150.628	0.37165	151	0.00246126	0.0143499
		0.6024	318	17	301	34	335	0.101493	0.100592		0.9979	151.807	0.192609	151.615	0.385217	152	0.00253432	0.0143499
		0.5998	319	17	302	34	336	0.10119	0.100592		0.9979	152.8	0.199586	152.601	0.399172	153	0.00260896	0.0143499
		0.5996	320	17	303	34	337	0.10089	0.100592		0.9979	153.793	0.206761	153.586	0.413522	154	0.00268521	0.0143499
		0.591	321	17	304	34	338	0.100592	0.100592		0.9979	154.786	0.214139	154.572	0.428277	155	0.00276308	0.0143499
		0.5898	321	18	303	36	339	0.106195	0.104046		0.9979	155.778	0.221724	155.557	0.443447	156	0.00284261	0.0143499
		0.5859	322	18	304	36	340	0.105882	0.104046		0.9979	156.77	0.22952	156.541	0.459041	157	0.00292383	0.0143499
		0.5753	323	18	305	36	341	0.105572	0.104046		0.9979	157.762	0.237534	157.525	0.475068	158	0.00300676	0.0143499
		0.5597	324	18	306	36	342	0.105263	0.104046		0.9979	158.754	0.245769	158.508	0.491539	159	0.00309144	0.0143499
		0.5519	325	18	307	36	343	0.104956	0.104046		0.9979	159.746	0.254232	159.492	0.508463	160	0.00317789	0.0143499
		0.5485	326	18	308	36	344	0.104651	0.104046		0.9979	160.737	0.262926	160.474	0.525852	161	0.00326616	0.0143499
		0.544	328	18	310	36	346	0.104046	0.104046		0.9979	161.728	0.271858	161.456	0.543716	162	0.00335627	0.0143499
		0.5417	328	19	309	38	347	0.10951	0.108883		0.9979	162.719	0.281033	162.438	0.562065	163	0.00344825	0.0143499
		0.538	329	19	310	38	348	0.109195	0.108883		0.9979	163.71	0.290456	163.419	0.580912	164	0.00354215	0.0143499
		0.5284	330	19	311	38	349	0.108883	0.108883		0.9979	164.7	0.300134	164.4	0.600268	165	0.00363799	0.0143499
		0.5164	330	20	310	40	350	0.114286	0.113636		0.9979	165.69	0.310073	165.38	0.620145	166	0.00373581	0.0143499
		0.5096	331	20	311	40	351	0.11396	0.113636		0.9979	166.68	0.320278	166.359	0.640555	167	0.00383566	0.0143499
		0.5053	332	20	312	40	352	0.113636	0.113636		0.9978	167.669	0.330755	167.338	0.661511	168	0.00393756	0.0209549
		0.4975	332	21	311	42	353	0.11898	0.11898		0.9969	168.658	0.341512	168.317	0.683024	169	0.00404156	0.0215133
		0.4959	332	22	310	44	354	0.124294	0.124294		0.9968	169.647	0.352555	169.295	0.70511	170	0.0041477	0.0226699
		0.4846	332	23	309	46	355	0.129577	0.127778		0.9968	170.636	0.36389	170.272	0.72778	171	0.00425602	0.0226699
		0.4823	333	23	310	46	356	0.129213	0.127778		0.9968	171.624	0.375525	171.249	0.75105	172	0.00436657	0.0226699
		0.4712	334	23	311	46	357	0.128852	0.127778		0.9961	172.613	0.387466	172.225	0.774932	173	0.00447938	0.023882
		0.4672	335	23	312	46	358	0.128492	0.127778		0.9938	173.6	0.399721	173.201	0.799443	174	0.0045945	0.0254797
		0.4591	336	23	313	46	359	0.128134	0.127778		0.9938	174.588	0.412298	174.175	0.824596	175	0.00471198	0.0254797
		0.4524	337	23	314	46	360	0.127778	0.127778		0.9938	175.575	0.425204	175.15	0.850407	176	0.00483186	0.0254797
		0.4378	337	24	313	48	361	0.132964	0.13079		0.9938	176.562	0.438446	176.123	0.876893	177	0.0049542	0.0254797
		0.4367	338	24	314	48	362	0.132597	0.13079		0.9921	177.548	0.452034	177.096	0.904068	178	0.00507903	0.0275258
		0.4363	339	24	315	48	363	0.132231	0.13079		0.9921	178.534	0.465975	178.068	0.93195	179	0.00520642	0.0275258
		0.4357	340	24	316	48	364	0.131868	0.13079		0.9904	179.52	0.480278	179.039	0.960555	180	0.00533642	0.0297231
		0.4343	341	24	317	48	365	0.131507	0.13079		0.9904	180.505	0.494951	180.01	0.989902	181	0.00546907	0.0297231
		0.4286	342	24	318	48	366	0.131148	0.13079		0.9904	181.49	0.510004	180.98	1.02001	182	0.00560444	0.0297231
		0.4266	343	24	319	48	367	0.13079	0.13079		0.9904	182.475	0.525445	181.949	1.05089	183	0.00574257	0.0297231
		0.4235	343	25	318	50	368	0.13587	0.133333		0.9898	183.459	0.541285	182.917	1.08257	184	0.00588353	0.0316782
		0.4165	344	25	319	50	369	0.135501	0.133333		0.9884	184.442	0.557532	183.885	1.11506	185	0.00602737	0.0324936
		0.4096	345	25	320	50	370	0.135135	0.133333		0.9878	185.426	0.574197	184.852	1.14839	186	0.00617416	0.0333287
		0.4072	347	25	322	50	372	0.134409	0.133333		0.9864	186.409	0.591289	185.817	1.18258	187	0.00632395	0.0341841
		0.4065	348	25	323	50	373	0.134048	0.133333		0.9859	187.391	0.60882	186.782	1.21764	188	0.00647681	0.0350602
		0.4057	349	25	324	50	374	0.13369	0.133333		0.9843	188.373	0.626799	187.746	1.2536	189	0.00663279	0.0359576
		0.3959	350	25	325	50	375	0.133333	0.133333		0.9831	189.355	0.645238	188.71	1.29048	190	0.00679198	0.0373447
		0.3914	350	26	324	52	376	0.138298	0.137931		0.9831	190.336	0.664147	189.672	1.32829	191	0.00695442	0.0373447
		0.3826	351	26	325	52	377	0.137931	0.137931		0.983	191.316	0.683539	190.633	1.36708	192	0.0071202	0.0387826
		0.3778	351	27	324	54	378	0.142857	0.141732		0.9811	192.297	0.703425	191.593	1.40685	193	0.00728938	0.0397704
		0.3725	352	27	325	54	379	0.14248	0.141732		0.9795	193.276	0.723816	192.552	1.44763	194	0.00746203	0.0407822
		0.3706	353	27	326	54	380	0.142105	0.141732		0.9786	194.255	0.744726	193.511	1.48945	195	0.00763822	0.042346
		0.3694	354	27	327	54	381	0.141732	0.141732		0.9786	195.234	0.766167	194.468	1.53233	196	0.00781803	0.042346
		0.3572	354	28	326	56	382	0.146597	0.146214		0.9785	196.212	0.788151	195.424	1.5763	197	0.00800153	0.043967
		0.3571	355	28	327	56	383	0.146214	0.146214		0.9751	197.189	0.810692	196.379	1.62138	198	0.0081888	0.0450804
		0.3526	355	29	326	58	384	0.151042	0.150649		0.9747	198.166	0.833802	197.332	1.6676	199	0.00837992	0.0462208
		0.3449	356	29	327	58	385	0.150649	0.150649		0.9743	199.143	0.857497	198.285	1.71499	200	0.00857497	0.0491933
		0.3415	356	30	326	60	386	0.15544	0.153846		0.9743	200.118	0.88179	199.236	1.76358	201	0.00877403	0.0491933
		0.3411	357	30	327	60	387	0.155039	0.153846		0.9743	201.093	0.906696	200.187	1.81339	202	0.00897718	0.0491933
		0.3409	358	30	328	60	388	0.154639	0.153846		0.9743	202.068	0.932228	201.136	1.86446	203	0.00918451	0.0491933
		0.3408	359	30	329	60	389	0.154242	0.153846		0.971	203.042	0.958402	202.083	1.9168	204	0.0093961	0.0523476
		0.3396	360	30	330	60	390	0.153846	0.153846		0.9705	204.015	0.985234	203.03	1.97047	205	0.00961204	0.0536624
		0.339	360	31	329	62	391	0.158568	0.158568		0.9704	204.987	1.01274	203.975	2.02548	206	0.00983242	0.0550085
		0.3384	360	32	328	64	392	0.163265	0.160804		0.9702	205.959	1.04093	204.918	2.08187	207	0.0100573	0.0563866
		0.3379	361	32	329	64	393	0.16285	0.160804		0.9691	206.93	1.06983	205.86	2.13966	208	0.0102869	0.0585151
		0.3373	362	32	330	64	394	0.162437	0.160804		0.9691	207.901	1.09945	206.801	2.19891	209	0.0105211	0.0585151
		0.3367	363	32	331	64	395	0.162025	0.160804		0.9681	208.87	1.12981	207.74	2.25963	210	0.0107601	0.0607192
		0.3361	364	32	332	64	396	0.161616	0.160804		0.9677	209.839	1.16093	208.678	2.32186	211	0.0110041	0.0622317
		0.3355	365	32	333	64	397	0.161209	0.160804		0.9672	210.807	1.19282	209.614	2.38564	212	0.011253	0.0637794
		0.3349	366	32	334	64	398	0.160804	0.160804		0.9652	211.774	1.2255	210.549	2.45101	213	0.0115071	0.0653631
		0.3344	366	33	333	66	399	0.165414	0.165		0.965	212.741	1.259	211.482	2.51799	214	0.0117663	0.0669833
		0.3338	367	33	334	66	400	0.165	0.165		0.9644	213.707	1.29332	212.413	2.58663	215	0.0120309	0.0686407
		0.3332	368	34	334	68	402	0.169154	0.169154		0.9632	214.672	1.32849	213.343	2.65697	216	0.0123008	0.070336
		0.3326	368	35	333	70	403	0.173697	0.173697		0.9631	215.635	1.36452	214.271	2.72904	217	0.0125762	0.0720698
		0.332	368	36	332	72	404	0.178218	0.178218		0.9607	216.599	1.40144	215.197	2.80289	218	0.0128573	0.0738427
		0.3314	368	37	331	74	405	0.182716	0.181373		0.9583	217.561	1.43927	216.121	2.87854	219	0.013144	0.0756554
		0.3302	370	37	333	74	407	0.181818	0.181373		0.9557	218.522	1.47803	217.044	2.95605	220	0.0134366	0.0775085
		0.3298	371	37	334	74	408	0.181373	0.181373		0.9529	219.482	1.51773	217.965	3.03546	221	0.0137351	0.0803653
		0.3297	371	38	333	76	409	0.185819	0.185819		0.9529	220.442	1.5584	218.883	3.1168	222	0.0140396	0.0803653
		0.3295	371	39	332	78	410	0.190244	0.190244		0.9515	221.4	1.60006	219.8	3.20012	223	0.0143503	0.0833163
		0.3291	371	40	331	80	411	0.194647	0.194647		0.95	222.357	1.64273	220.715	3.28546	224	0.0146672	0.085337
		0.3285	371	41	330	82	412	0.199029	0.199029		0.9482	223.314	1.68643	221.627	3.37286	225	0.0149905	0.087401
		0.3279	371	42	329	84	413	0.20339	0.20339		0.9475	224.269	1.73118	222.538	3.46237	226	0.0153202	0.0905794
		0.3277	371	43	328	86	414	0.207729	0.204762		0.9475	225.223	1.77702	223.446	3.55403	227	0.0156565	0.0905794
		0.3274	372	43	329	86	415	0.207229	0.204762		0.947	226.176	1.82395	224.352	3.64789	228	0.0159995	0.0938581
		0.3273	373	43	330	86	416	0.206731	0.204762		0.9453	227.128	1.872	225.256	3.74399	229	0.0163493	0.0961005
		0.3267	374	43	331	86	417	0.206235	0.204762		0.9436	228.079	1.92119	226.158	3.84239	230	0.016706	0.0983886
		0.3261	375	43	332	86	418	0.205742	0.204762		0.9433	229.028	1.97156	227.057	3.94311	231	0.0170697	0.101907
		0.3255	376	43	333	86	419	0.205251	0.204762		0.9433	229.977	2.02311	227.954	4.04622	232	0.0174406	0.101907
		0.3249	377	43	334	86	420	0.204762	0.204762		0.9431	230.924	2.07587	228.848	4.15175	233	0.0178187	0.105532
		0.3243	377	44	333	88	421	0.209026	0.208038		0.9401	231.87	2.12988	229.74	4.25976	234	0.0182041	0.108007
		0.3237	378	44	334	88	422	0.208531	0.208038		0.9397	232.815	2.18514	230.63	4.37029	235	0.018597	0.110529
		0.3231	379	44	335	88	423	0.208038	0.208038		0.9375	233.758	2.2417	231.517	4.48339	236	0.0189974	0.113099
		0.3225	379	45	334	90	424	0.212264	0.212264		0.9364	234.7	2.29955	232.401	4.59911	237	0.0194055	0.115718
		0.322	380	46	334	92	426	0.215962	0.213953		0.9332	235.641	2.35875	233.283	4.7175	238	0.0198214	0.118384
		0.3218	381	46	335	92	427	0.215457	0.213953		0.9303	236.581	2.4193	234.161	4.8386	239	0.0202452	0.121099
		0.3214	382	46	336	92	428	0.214953	0.213953		0.9282	237.519	2.48123	235.038	4.96246	240	0.0206769	0.123862
		0.3208	383	46	337	92	429	0.214452	0.213953		0.9276	238.455	2.54457	235.911	5.08913	241	0.0211167	0.128097
		0.3202	384	46	338	92	430	0.213953	0.213953		0.9276	239.391	2.60933	236.781	5.21867	242	0.0215647	0.128097
		0.3196	384	47	337	94	431	0.218097	0.218097		0.926	240.324	2.67556	237.649	5.35111	243	0.022021	0.13244
		0.3187	384	48	336	96	432	0.222222	0.219178		0.9246	241.257	2.74325	238.513	5.48651	244	0.0224857	0.135396
		0.3184	385	48	337	96	433	0.221709	0.219178		0.9238	242.188	2.81246	239.375	5.62491	245	0.0229588	0.1384
		0.3182	386	48	338	96	434	0.221198	0.219178		0.9191	243.117	2.88318	240.234	5.76637	246	0.0234405	0.141452
		0.3178	387	48	339	96	435	0.22069	0.219178		0.9176	244.045	2.95546	241.089	5.91092	247	0.0239308	0.144551
		0.3172	388	48	340	96	436	0.220183	0.219178		0.9173	244.971	3.02931	241.941	6.05862	248	0.0244299	0.147697
		0.3166	389	48	341	96	437	0.21968	0.219178		0.9141	245.895	3.10476	242.79	6.20951	249	0.0249378	0.152504
		0.316	390	48	342	96	438	0.219178	0.219178		0.9141	246.818	3.18182	243.636	6.36364	250	0.0254546	0.152504
		0.3154	390	49	341	98	439	0.223235	0.221219		0.912	247.739	3.26053	244.479	6.52106	251	0.0259803	0.157414
		0.3148	391	49	342	98	440	0.222727	0.221219		0.9093	248.659	3.3409	245.318	6.6818	252	0.0265151	0.160744
		0.3142	392	49	343	98	441	0.222222	0.221219		0.9084	249.577	3.42296	246.154	6.84592	253	0.027059	0.164118
		0.3135	393	49	344	98	442	0.221719	0.221219		0.9032	250.493	3.50673	246.987	7.01346	254	0.027612	0.167536
		0.3129	394	49	345	98	443	0.221219	0.221219		0.899	251.408	3.59223	247.816	7.18446	255	0.0281743	0.170996
		0.3117	394	50	344	100	444	0.225225	0.221239		0.8973	252.321	3.67948	248.641	7.35896	256	0.0287459	0.174499
		0.3111	395	50	345	100	445	0.224719	0.221239		0.8931	253.231	3.7685	249.463	7.537	257	0.0293269	0.178043
		0.3104	396	50	346	100	446	0.224215	0.221239		0.8924	254.141	3.85932	250.281	7.71863	258	0.0299172	0.181627
		0.3092	397	50	347	100	447	0.223714	0.221239		0.891	255.048	3.95194	251.096	7.90388	259	0.0305169	0.187076
		0.3085	398	50	348	100	448	0.223214	0.221239		0.891	255.954	4.0464	251.907	8.0928	260	0.0311261	0.187076
		0.3079	399	50	349	100	449	0.222717	0.221239		0.8877	256.857	4.1427	252.715	8.28541	261	0.0317449	0.192609
		0.3072	400	50	350	100	450	0.222222	0.221239		0.8844	257.759	4.24088	253.518	8.48175	262	0.0323731	0.196343
		0.3065	401	50	351	100	451	0.221729	0.221239		0.879	258.659	4.34093	254.318	8.68186	263	0.0330109	0.200111
		0.3058	402	50	352	100	452	0.221239	0.221239		0.8774	259.557	4.44289	255.114	8.88578	264	0.0336583	0.203912
		0.3045	402	51	351	102	453	0.225166	0.225166		0.8755	260.453	4.54676	255.906	9.09352	265	0.0343152	0.207745
		0.3037	402	52	350	104	454	0.229075	0.229075		0.8701	261.347	4.65257	256.695	9.30513	266	0.0349817	0.211608
		0.303	402	53	349	106	455	0.232967	0.232456		0.8694	262.24	4.76032	257.479	9.52063	267	0.0356578	0.215499
		0.3023	403	53	350	106	456	0.232456	0.232456		0.8623	263.13	4.87003	258.26	9.74005	268	0.0363435	0.219418
		0.3002	403	54	349	108	457	0.236324	0.235808		0.8603	264.018	4.98171	259.037	9.96342	269	0.0370387	0.223362
		0.3	404	54	350	108	458	0.235808	0.235808		0.8583	264.905	5.09537	259.809	10.1907	270	0.0377435	0.22733
		0.2992	404	55	349	110	459	0.239651	0.238095		0.8576	265.789	5.21103	260.578	10.4221	271	0.0384578	0.231321
		0.2984	405	55	350	110	460	0.23913	0.238095		0.8555	266.671	5.3287	261.343	10.6574	272	0.0391816	0.235332
		0.298	406	55	351	110	461	0.238612	0.238095		0.8542	267.552	5.44838	262.103	10.8968	273	0.0399149	0.239362
		0.2976	407	55	352	110	462	0.238095	0.238095		0.85	268.43	5.57009	262.86	11.1402	274	0.0406576	0.243409
		0.2967	407	56	351	112	463	0.241901	0.241901		0.8458	269.306	5.69382	263.612	11.3876	275	0.0414096	0.247472
		0.2959	407	57	350	114	464	0.24569	0.244111		0.8457	270.18	5.8196	264.361	11.6392	276	0.042171	0.251548
		0.2955	410	57	353	114	467	0.244111	0.244111		0.8444	271.053	5.94741	265.105	11.8948	277	0.0429416	0.255635
		0.295	410	58	352	116	468	0.247863	0.245243		0.844	271.923	6.07728	265.845	12.1546	278	0.0437214	0.259733
		0.2941	411	58	353	116	469	0.247335	0.245243		0.8392	272.791	6.2092	266.582	12.4184	279	0.0445104	0.263839
		0.2932	412	58	354	116	470	0.246809	0.245243		0.8367	273.657	6.34318	267.314	12.6864	280	0.0453084	0.26795
		0.2928	413	58	355	116	471	0.246285	0.245243		0.8362	274.521	6.47921	268.042	12.9584	281	0.0461154	0.272067
		0.2922	414	58	356	116	472	0.245763	0.245243		0.8327	275.383	6.6173	268.765	13.2346	282	0.0469312	0.276185
		0.2918	415	58	357	116	473	0.245243	0.245243		0.832	276.243	6.75745	269.485	13.5149	283	0.0477559	0.280305
		0.2915	415	59	356	118	474	0.248945	0.248421		0.8309	277.1	6.89967	270.201	13.7993	284	0.0485892	0.284423
		0.2913	416	59	357	118	475	0.248421	0.248421		0.8289	277.956	7.04394	270.912	14.0879	285	0.0494311	0.288539
		0.2904	416	60	356	120	476	0.252101	0.24948		0.8273	278.81	7.19026	271.619	14.3805	286	0.0502815	0.29265
		0.2903	417	60	357	120	477	0.251572	0.24948		0.8203	279.661	7.33864	272.323	14.6773	287	0.0511403	0.296754
		0.2902	418	60	358	120	478	0.251046	0.24948		0.8175	280.511	7.48906	273.022	14.9781	288	0.0520074	0.30085
		0.2893	419	60	359	120	479	0.250522	0.24948		0.8147	281.358	7.64153	273.717	15.2831	289	0.0528826	0.304936
		0.2888	420	60	360	120	480	0.25	0.24948		0.8124	282.204	7.79603	274.408	15.5921	290	0.0537658	0.309011
		0.2885	421	60	361	120	481	0.24948	0.24948		0.8072	283.047	7.95257	275.095	15.9051	291	0.0546568	0.315098
		0.2883	421	61	360	122	482	0.253112	0.250996		0.8072	283.889	8.11113	275.778	16.2223	292	0.0555557	0.315098
		0.2872	422	61	361	122	483	0.252588	0.250996		0.8019	284.728	8.27171	276.457	16.5434	293	0.0564622	0.32115
		0.2862	423	62	361	124	485	0.25567	0.250996		0.7984	285.566	8.43429	277.131	16.8686	294	0.0573761	0.325163
		0.2858	424	62	362	124	486	0.255144	0.250996		0.7854	286.401	8.59886	277.802	17.1977	295	0.0582974	0.329156
		0.2857	425	62	363	124	487	0.25462	0.250996		0.781	287.235	8.76543	278.469	17.5309	296	0.0592259	0.333129
		0.2855	427	62	365	124	489	0.253579	0.250996		0.7796	288.066	8.93397	279.132	17.8679	297	0.0601614	0.33708
		0.2828	428	62	366	124	490	0.253061	0.250996		0.7787	288.896	9.10447	279.791	18.2089	298	0.0611038	0.341008
		0.2816	430	62	368	124	492	0.252033	0.250996		0.7738	289.723	9.27693	280.446	18.5539	299	0.062053	0.344911
		0.2804	431	62	369	124	493	0.251521	0.250996		0.7716	290.549	9.45132	281.097	18.9026	300	0.0630088	0.348788
		0.2798	432	62	370	124	494	0.251012	0.250996		0.7692	291.372	9.62764	281.745	19.2553	301	0.063971	0.352639
		0.2792	432	63	369	126	495	0.254545	0.250996		0.7633	292.194	9.80587	282.388	19.6117	302	0.0649395	0.356461
		0.278	433	63	370	126	496	0.254032	0.250996		0.7624	293.014	9.986	283.028	19.972	303	0.0659142	0.360255
		0.2767	434	63	371	126	497	0.253521	0.250996		0.7618	293.832	10.168	283.664	20.336	304	0.0668948	0.364019
		0.2755	435	63	372	126	498	0.253012	0.250996		0.7494	294.648	10.3519	284.296	20.7038	305	0.0678812	0.367753
		0.2754	436	63	373	126	499	0.252505	0.250996		0.7472	295.462	10.5376	284.925	21.0752	306	0.0688732	0.371455
		0.2741	437	63	374	126	500	0.252	0.250996		0.7447	296.275	10.7252	285.55	21.4503	307	0.0698708	0.375124
		0.2733	438	63	375	126	501	0.251497	0.250996		0.7366	297.085	10.9145	286.171	21.8291	308	0.0708737	0.378761
		0.2732	439	63	376	126	502	0.250996	0.250996		0.7362	297.894	11.1057	286.789	22.2115	309	0.0718817	0.382364
		0.2729	439	64	375	128	503	0.254473	0.254473		0.7303	298.701	11.2987	287.403	22.5974	310	0.0728948	0.385933
		0.2727	439	65	374	130	504	0.257937	0.255403		0.7132	299.507	11.4934	288.013	22.9869	311	0.0739127	0.389467
		0.2714	440	65	375	130	505	0.257426	0.255403		0.7128	300.31	11.6899	288.62	23.3798	312	0.0749353	0.392966
		0.2707	441	65	376	130	506	0.256917	0.255403		0.7098	301.112	11.8881	289.224	23.7762	313	0.0759624	0.396429
		0.2706	442	65	377	130	507	0.25641	0.255403		0.7086	301.912	12.0881	289.824	24.1761	314	0.076994	0.399857
		0.2699	443	65	378	130	508	0.255906	0.255403		0.7029	302.71	12.2897	290.421	24.5793	315	0.0780297	0.403248
		0.2673	444	65	379	130	509	0.255403	0.255403		0.7	303.507	12.493	291.014	24.986	316	0.0790695	0.406603
		0.2671	444	66	378	132	510	0.258824	0.258317		0.6945	304.302	12.6979	291.604	25.3959	317	0.0801132	0.409922
		0.2661	445	66	379	132	511	0.258317	0.258317		0.6891	305.095	12.9045	292.191	25.8091	318	0.0811606	0.413203
		0.2656	445	67	378	134	512	0.261719	0.2607		0.6825	305.887	13.1128	292.774	26.2255	319	0.0822117	0.416448
		0.2646	446	67	379	134	513	0.261209	0.2607		0.6816	306.677	13.3226	293.355	26.6452	320	0.0832662	0.419656
		0.2641	447	67	380	134	514	0.2607	0.2607		0.6801	307.466	13.534	293.932	27.068	321	0.084324	0.422827
		0.2625	447	69	378	138	516	0.267442	0.267442		0.6755	308.253	13.747	294.506	27.494	322	0.085385	0.425961
		0.2616	447	70	377	140	517	0.270793	0.270793		0.6718	309.038	13.9615	295.077	27.923	323	0.086449	0.429058
		0.261	447	71	376	142	518	0.274131	0.274131		0.6713	309.822	14.1776	295.645	28.3551	324	0.0875158	0.432119
		0.2602	447	72	375	144	519	0.277457	0.27704		0.667	310.605	14.3951	296.21	28.7903	325	0.0885855	0.435143
		0.2577	448	73	375	146	521	0.28023	0.27704		0.6522	311.386	14.6142	296.772	29.2284	326	0.0896577	0.438131
		0.2566	449	73	376	146	522	0.279693	0.27704		0.6518	312.165	14.8347	297.331	29.6695	327	0.0907324	0.441082
		0.2562	450	73	377	146	523	0.279159	0.27704		0.6372	312.943	15.0567	297.887	30.1135	328	0.0918094	0.443998
		0.2561	451	73	378	146	524	0.278626	0.27704		0.6357	313.72	15.2802	298.44	30.5604	329	0.0928886	0.446879
		0.2555	452	73	379	146	525	0.278095	0.27704		0.6219	314.495	15.505	298.99	31.0101	330	0.0939699	0.449724
		0.2544	453	73	380	146	526	0.277567	0.27704		0.615	315.269	15.7313	299.537	31.4626	331	0.0950532	0.452534
		0.2537	454	73	381	146	527	0.27704	0.27704		0.6088	316.041	15.959	300.082	31.9179	332	0.0961383	0.455309
		0.2529	454	74	380	148	528	0.280303	0.279245		0.6065	316.812	16.188	300.624	32.376	333	0.0972251	0.45805
		0.2527	455	74	381	148	529	0.279773	0.279245		0.6037	317.582	16.4184	301.163	32.8367	334	0.0983135	0.460758
		0.2519	456	74	382	148	530	0.279245	0.279245		0.6024	318.35	16.6501	301.7	33.3002	335	0.0994034	0.463432
		0.251	456	75	381	150	531	0.282486	0.281426		0.5998	319.117	16.8831	302.234	33.7662	336	0.100495	0.466073
		0.2504	457	75	382	150	532	0.281955	0.281426		0.5996	319.883	17.1175	302.765	34.2349	337	0.101587	0.468682
		0.2492	458	75	383	150	533	0.281426	0.281426		0.591	320.647	17.3531	303.294	34.7062	338	0.102681	0.471259
		0.2489	458	76	382	152	534	0.284644	0.284644		0.5898	321.41	17.59	303.82	35.18	339	0.103776	0.473804
		0.2486	458	77	381	154	535	0.28785	0.285714		0.5859	322.172	17.8281	304.344	35.6563	340	0.104871	0.476318
		0.2484	459	77	382	154	536	0.287313	0.285714		0.5753	322.932	18.0675	304.865	36.1351	341	0.105968	0.478801
		0.2476	460	77	383	154	537	0.286778	0.285714		0.5597	323.692	18.3082	305.384	36.6163	342	0.107065	0.481254
		0.2475	461	77	384	154	538	0.286245	0.285714		0.5519	324.45	18.55	305.9	37.1	343	0.108163	0.483678
		0.2462	462	77	385	154	539	0.285714	0.285714		0.5485	325.207	18.793	306.414	37.5861	344	0.109262	0.486073
		0.2456	462	78	384	156	540	0.288889	0.287823		0.544	325.963	19.0373	306.925	38.0745	345	0.110361	0.489611
		0.2445	463	78	385	156	541	0.288355	0.287823		0.544	326.717	19.2826	307.435	38.5653	346	0.11146	0.489611
		0.2438	464	78	386	156	542	0.287823	0.287823		0.5417	327.471	19.5292	307.942	39.0584	347	0.11256	0.493087
		0.2434	464	79	385	158	543	0.290976	0.289377		0.538	328.223	19.7769	308.446	39.5538	348	0.11366	0.49537
		0.2428	465	79	386	158	544	0.290441	0.289377		0.5284	328.974	20.0257	308.949	40.0514	349	0.11476	0.497627
		0.242	466	79	387	158	545	0.289908	0.289377		0.5164	329.724	20.2756	309.449	40.5512	350	0.115861	0.499858
		0.2401	467	79	388	158	546	0.289377	0.289377		0.5096	330.473	20.5266	309.947	41.0533	351	0.116961	0.502063
		0.2382	467	80	387	160	547	0.292505	0.292505		0.5053	331.221	20.7788	310.442	41.5575	352	0.118061	0.504244
		0.2379	467	81	386	162	548	0.29562	0.29562		0.4975	331.968	21.032	310.936	42.0639	353	0.119161	0.5064
		0.2377	467	82	385	164	549	0.298725	0.298725		0.4959	332.714	21.2862	311.428	42.5725	354	0.120261	0.508532
		0.2375	467	83	384	166	550	0.301818	0.301818		0.4846	333.458	21.5416	311.917	43.0831	355	0.121361	0.51064
		0.2371	467	84	383	168	551	0.3049	0.3049		0.4823	334.202	21.7979	312.404	43.5958	356	0.12246	0.512726
		0.2367	467	85	382	170	552	0.307971	0.307414		0.4712	334.945	22.0553	312.889	44.1106	357	0.123559	0.514789
		0.2365	468	85	383	170	553	0.307414	0.307414		0.4672	335.686	22.3137	313.373	44.6275	358	0.124658	0.51683
		0.2363	468	86	382	172	554	0.310469	0.30991		0.4591	336.427	22.5732	313.854	45.1463	359	0.125756	0.51885
		0.2362	469	86	383	172	555	0.30991	0.30991		0.4524	337.166	22.8336	314.333	45.6672	360	0.126853	0.520849
		0.2361	469	87	382	174	556	0.31295	0.31295		0.4378	337.905	23.095	314.81	46.19	361	0.12795	0.522827
		0.2357	469	88	381	176	557	0.315978	0.314848		0.4367	338.643	23.3574	315.285	46.7148	362	0.129046	0.524785
		0.2355	470	88	382	176	558	0.315412	0.314848		0.4363	339.379	23.6207	315.759	47.2415	363	0.130142	0.526724
		0.2351	471	88	383	176	559	0.314848	0.314848		0.4357	340.115	23.8851	316.23	47.7701	364	0.131237	0.528643
		0.2347	471	89	382	178	560	0.317857	0.317291		0.4343	340.85	24.1503	316.699	48.3007	365	0.132331	0.530543
		0.2345	472	89	383	178	561	0.317291	0.317291		0.4286	341.583	24.4165	317.167	48.8331	366	0.133424	0.532425
		0.2343	472	90	382	180	562	0.320285	0.320285		0.4266	342.316	24.6837	317.633	49.3674	367	0.134516	0.53429
		0.2342	472	91	381	182	563	0.323268	0.322695		0.4235	343.048	24.9518	318.096	49.9035	368	0.135607	0.536136
		0.2339	473	91	382	182	564	0.322695	0.322695		0.4165	343.779	25.2207	318.559	50.4415	369	0.136698	0.537966
		0.2334	473	92	381	184	565	0.325664	0.324515		0.4096	344.509	25.4906	319.019	50.9813	370	0.137787	0.539779
		0.2325	474	92	382	184	566	0.325088	0.324515		0.4072	345.239	25.7614	319.477	51.5228	371	0.138876	0.542468
		0.2323	475	92	383	184	567	0.324515	0.324515		0.4072	345.967	26.0331	319.934	52.0662	372	0.139963	0.542468
		0.2321	475	93	382	186	568	0.327465	0.326316		0.4065	346.694	26.3057	320.389	52.6113	373	0.141049	0.545121
		0.2317	476	93	383	186	569	0.326889	0.326316		0.4057	347.421	26.5791	320.842	53.1582	374	0.142134	0.546871
		0.2312	477	93	384	186	570	0.326316	0.326316		0.3959	348.147	26.8534	321.293	53.7068	375	0.143218	0.548606
		0.2308	477	94	383	188	571	0.329247	0.329247		0.3914	348.871	27.1286	321.743	54.2571	376	0.144301	0.550327
		0.2303	478	95	383	190	573	0.331588	0.33101		0.3826	349.595	27.4046	322.191	54.8091	377	0.145382	0.552033
		0.2302	479	95	384	190	574	0.33101	0.33101		0.3778	350.319	27.6814	322.637	55.3629	378	0.146463	0.553725
		0.2299	479	96	383	192	575	0.333913	0.333913		0.3725	351.041	27.9591	323.082	55.9183	379	0.147542	0.555404
		0.2294	479	97	382	194	576	0.336806	0.33677		0.3706	351.762	28.2377	323.525	56.4753	380	0.148619	0.55707
		0.2291	479	98	381	196	577	0.339688	0.33677		0.3694	352.483	28.517	323.966	57.0341	381	0.149696	0.558722
		0.229	480	98	382	196	578	0.3391	0.33677		0.3572	353.203	28.7972	324.406	57.5944	382	0.150771	0.560362
		0.2285	481	98	383	196	579	0.338515	0.33677		0.3571	353.922	29.0782	324.844	58.1564	383	0.151844	0.56199
		0.2282	483	98	385	196	581	0.337349	0.33677		0.3526	354.64	29.36	325.28	58.72	384	0.152917	0.563605
		0.2281	484	98	386	196	582	0.33677	0.33677		0.3449	355.357	29.6426	325.715	59.2852	385	0.153988	0.565209
		0.2276	485	99	386	198	584	0.339041	0.339041		0.3415	356.074	29.926	326.148	59.852	386	0.155057	0.566801
		0.2269	485	100	385	200	585	0.34188	0.340716		0.3411	356.79	30.2102	326.58	60.4204	387	0.156125	0.568382
		0.2267	487	100	387	200	587	0.340716	0.340716		0.3409	357.505	30.4952	327.01	60.9904	388	0.157192	0.569951
		0.2262	487	101	386	202	588	0.343537	0.342954		0.3408	358.219	30.7809	327.438	61.5619	389	0.158257	0.57151
		0.2261	488	101	387	202	589	0.342954	0.342954		0.3396	358.933	31.0675	327.865	62.1349	390	0.15932	0.573059
		0.2253	488	102	386	204	590	0.345763	0.344595		0.339	359.645	31.3548	328.29	62.7095	391	0.160382	0.574597
		0.2248	489	102	387	204	591	0.345178	0.344595		0.3384	360.357	31.6428	328.714	63.2857	392	0.161443	0.576124
		0.2243	490	102	388	204	592	0.344595	0.344595		0.3379	361.068	31.9316	329.137	63.8633	393	0.162502	0.577642
		0.2241	490	103	387	206	593	0.347386	0.345059		0.3373	361.779	32.2212	329.558	64.4424	394	0.163559	0.57915
		0.2238	491	103	388	206	594	0.346801	0.345059		0.3367	362.488	32.5115	329.977	65.0231	395	0.164615	0.580649
		0.2234	492	103	389	206	595	0.346218	0.345059		0.3361	363.197	32.8026	330.395	65.6052	396	0.16567	0.582138
		0.2229	493	103	390	206	596	0.345638	0.345059		0.3355	363.906	33.0944	330.811	66.1888	397	0.166723	0.583618
		0.2224	494	103	391	206	597	0.345059	0.345059		0.3349	364.613	33.387	331.226	66.7739	398	0.167774	0.585089
		0.2223	494	104	390	208	598	0.347826	0.347245		0.3344	365.32	33.6802	331.64	67.3605	399	0.168823	0.586551
		0.2221	495	104	391	208	599	0.347245	0.347245		0.3338	366.026	33.9742	332.052	67.9485	400	0.169871	0.588005
		0.2214	495	105	390	210	600	0.35	0.35		0.3332	366.731	34.269	332.462	68.5379	401	0.170918	0.590169
		0.221	495	106	389	212	601	0.352745	0.352159		0.3332	367.436	34.5644	332.871	69.1288	402	0.171962	0.590169
		0.2199	496	106	390	212	602	0.352159	0.352159		0.3326	368.139	34.8606	333.279	69.7211	403	0.173005	0.592315
		0.2198	496	107	389	214	603	0.354892	0.354305		0.332	368.843	35.1574	333.685	70.3149	404	0.174047	0.593736
		0.2194	497	107	390	214	604	0.354305	0.354305		0.3314	369.545	35.455	334.09	70.91	405	0.175086	0.595148
		0.2188	497	108	389	216	605	0.357025	0.357025		0.3302	370.247	35.7533	334.493	71.5066	406	0.176125	0.597253
		0.2183	497	109	388	218	606	0.359736	0.357964		0.3302	370.948	36.0523	334.895	72.1045	407	0.177161	0.597253
		0.2182	498	109	389	218	607	0.359143	0.357964		0.3298	371.648	36.3519	335.296	72.7039	408	0.178196	0.59934
		0.2178	500	109	391	218	609	0.357964	0.357964		0.3297	372.348	36.6523	335.695	73.3046	409	0.179229	0.600723
		0.2177	500	110	390	220	610	0.360656	0.360656		0.3295	373.047	36.9533	336.093	73.9067	410	0.18026	0.602098
		0.2175	500	111	389	222	611	0.363339	0.363339		0.3291	373.745	37.2551	336.49	74.5102	411	0.18129	0.603466
		0.2167	500	112	388	224	612	0.366013	0.365416		0.3285	374.443	37.5575	336.885	75.115	412	0.182318	0.604828
		0.2162	501	112	389	224	613	0.365416	0.365416		0.3279	375.139	37.8606	337.279	75.7212	413	0.183344	0.606182
		0.2159	501	113	388	226	614	0.368078	0.365696		0.3277	375.836	38.1643	337.671	76.3287	414	0.184369	0.60753
		0.2157	503	113	390	226	616	0.366883	0.365696		0.3274	376.531	38.4688	338.062	76.9376	415	0.185392	0.60887
		0.2155	504	113	391	226	617	0.366288	0.365696		0.3273	377.226	38.7739	338.452	77.5478	416	0.186413	0.610205
		0.2151	505	113	392	226	618	0.365696	0.365696		0.3267	377.92	39.0796	338.841	78.1593	417	0.187432	0.611533
		0.2146	505	114	391	228	619	0.368336	0.365971		0.3261	378.614	39.3861	339.228	78.7722	418	0.18845	0.612854
		0.2145	506	114	392	228	620	0.367742	0.365971		0.3255	379.307	39.6932	339.614	79.3863	419	0.189466	0.614169
		0.2142	507	114	393	228	621	0.36715	0.365971		0.3249	379.999	40.0009	339.998	80.0018	420	0.19048	0.615478
		0.214	509	114	395	228	623	0.365971	0.365971		0.3243	380.691	40.3093	340.381	80.6186	421	0.191493	0.616781
		0.2133	509	115	394	230	624	0.36859	0.367412		0.3237	381.382	40.6183	340.763	81.2367	422	0.192504	0.618078
		0.2129	510	115	395	230	625	0.368	0.367412		0.3231	382.072	40.928	341.144	81.856	423	0.193513	0.619369
		0.2124	511	115	396	230	626	0.367412	0.367412		0.3225	382.762	41.2383	341.523	82.4767	424	0.19452	0.620654
		0.2121	511	117	394	234	628	0.372611	0.369668		0.322	383.451	41.5493	341.901	83.0986	425	0.195526	0.62257
		0.2118	512	117	395	234	629	0.372019	0.369668		0.322	384.139	41.8609	342.278	83.7218	426	0.19653	0.62257
		0.2117	513	117	396	234	630	0.371429	0.369668		0.3218	384.827	42.1731	342.654	84.3463	427	0.197532	0.624474
		0.2112	514	117	397	234	631	0.37084	0.369668		0.3214	385.514	42.486	343.028	84.972	428	0.198533	0.625736
		0.211	515	117	398	234	632	0.370253	0.369668		0.3208	386.2	42.7995	343.401	85.599	429	0.199532	0.626993
		0.2109	516	117	399	234	633	0.369668	0.369668		0.3202	386.886	43.1136	343.773	86.2273	430	0.200529	0.628244
		0.2107	516	118	398	236	634	0.37224	0.37224		0.3196	387.572	43.4284	344.143	86.8568	431	0.201524	0.62949
		0.2101	518	119	399	238	637	0.373626	0.373626		0.3187	388.256	43.7437	344.513	87.4875	432	0.202517	0.63073
		0.2099	518	120	398	240	638	0.376176	0.375		0.3184	388.94	44.0597	344.881	88.1194	433	0.203509	0.631965
		0.2095	519	120	399	240	639	0.375587	0.375		0.3182	389.624	44.3763	345.247	88.7526	434	0.204499	0.633195
		0.2092	520	120	400	240	640	0.375	0.375		0.3178	390.306	44.6935	345.613	89.3871	435	0.205487	0.634419
		0.2091	520	121	399	242	641	0.377535	0.377535		0.3172	390.989	45.0113	345.977	90.0227	436	0.206474	0.635639
		0.2089	522	122	400	244	644	0.378882	0.378462		0.3166	391.67	45.3298	346.34	90.6596	437	0.207459	0.636853
		0.2088	523	123	400	246	646	0.380805	0.378462		0.316	392.351	45.6488	346.702	91.2976	438	0.208442	0.638063
		0.2083	524	123	401	246	647	0.380216	0.378462		0.3154	393.032	45.9684	347.063	91.9369	439	0.209423	0.639267
		0.2079	525	123	402	246	648	0.37963	0.378462		0.3148	393.711	46.2887	347.423	92.5773	440	0.210403	0.640467
		0.2078	526	123	403	246	649	0.379045	0.378462		0.3142	394.39	46.6095	347.781	93.219	441	0.211381	0.641661
		0.2077	527	123	404	246	650	0.378462	0.378462		0.3135	395.069	46.9309	348.138	93.8619	442	0.212357	0.642851
		0.2074	527	124	403	248	651	0.380952	0.380952		0.3129	395.747	47.2529	348.494	94.5059	443	0.213332	0.644036
		0.2071	527	125	402	250	652	0.383436	0.382848		0.3117	396.424	47.5756	348.849	95.1511	444	0.214304	0.645216
		0.207	528	125	403	250	653	0.382848	0.382848		0.3111	397.101	47.8988	349.202	95.7975	445	0.215275	0.646392
		0.2065	531	126	405	252	657	0.383562	0.383562		0.3104	397.777	48.2225	349.555	96.4451	446	0.216245	0.647562
		0.2063	531	127	404	254	658	0.386018	0.386018		0.3092	398.453	48.5469	349.906	97.0938	447	0.217212	0.648729
		0.2062	531	128	403	256	659	0.388467	0.387879		0.3085	399.128	48.8718	350.256	97.7437	448	0.218178	0.64989
		0.2059	532	128	404	256	660	0.387879	0.387879		0.3079	399.803	49.1974	350.605	98.3947	449	0.219142	0.651047
		0.2053	533	129	404	258	662	0.389728	0.38797		0.3072	400.477	49.5235	350.953	99.0469	450	0.220104	0.652199
		0.2049	534	129	405	258	663	0.38914	0.38797		0.3065	401.15	49.8501	351.3	99.7003	451	0.221065	0.653347
		0.2042	535	129	406	258	664	0.388554	0.38797		0.3058	401.823	50.1774	351.645	100.355	452	0.222024	0.654491
		0.2041	536	129	407	258	665	0.38797	0.38797		0.3045	402.495	50.5052	351.99	101.01	453	0.222981	0.65563
		0.204	536	130	406	260	666	0.39039	0.389805		0.3037	403.166	50.8336	352.333	101.667	454	0.223936	0.656764
		0.2034	537	130	407	260	667	0.389805	0.389805		0.303	403.837	51.1625	352.675	102.325	455	0.22489	0.657894
		0.2029	537	131	406	262	668	0.392216	0.392216		0.3023	404.508	51.492	353.016	102.984	456	0.225842	0.65902
		0.2028	537	132	405	264	669	0.394619	0.394619		0.3002	405.178	51.8221	353.356	103.644	457	0.226793	0.660142
		0.2024	537	133	404	266	670	0.397015	0.396423		0.3	405.847	52.1527	353.695	104.305	458	0.227741	0.661259
		0.2022	538	133	405	266	671	0.396423	0.396423		0.2992	406.516	52.4839	354.032	104.968	459	0.228688	0.662372
		0.2019	538	134	404	268	672	0.39881	0.39881		0.2984	407.184	52.8157	354.369	105.631	460	0.229633	0.663481
		0.2017	538	135	403	270	673	0.401189	0.400593		0.298	407.852	53.148	354.704	106.296	461	0.230577	0.664585
		0.2015	539	135	404	270	674	0.400593	0.400593		0.2976	408.519	53.4808	355.038	106.962	462	0.231519	0.665686
		0.2009	540	136	404	272	676	0.402367	0.402367		0.2967	409.186	53.8142	355.372	107.628	463	0.232459	0.666782
		0.2002	540	137	403	274	677	0.404727	0.404727		0.2959	409.852	54.1481	355.704	108.296	464	0.233397	0.667874
		0.2	540	138	402	276	678	0.40708	0.40648		0.2955	410.517	54.4826	356.035	108.965	465	0.234334	0.670046
		0.1995	541	138	403	276	679	0.40648	0.40648		0.2955	411.182	54.8176	356.365	109.635	466	0.235269	0.670046
		0.199	541	139	402	278	680	0.408824	0.408824		0.2955	411.847	55.1532	356.694	110.306	467	0.236202	0.670046
		0.1989	541	140	401	280	681	0.41116	0.410256		0.295	412.511	55.4893	357.021	110.979	468	0.237134	0.672202
		0.1988	542	140	402	280	682	0.410557	0.410256		0.2941	413.174	55.8259	357.348	111.652	469	0.238064	0.673274
		0.1982	543	141	402	282	684	0.412281	0.410256		0.2932	413.837	56.1631	357.674	112.326	470	0.238992	0.674341
		0.1978	545	141	404	282	686	0.411079	0.410256		0.2928	414.499	56.5008	357.998	113.002	471	0.239918	0.675405
		0.1977	546	141	405	282	687	0.41048	0.410256		0.2922	415.161	56.839	358.322	113.678	472	0.240843	0.676465
		0.1974	547	142	405	284	689	0.412192	0.410256		0.2918	415.822	57.1778	358.644	114.356	473	0.241767	0.677521
		0.1972	549	142	407	284	691	0.410999	0.410256		0.2915	416.483	57.5171	358.966	115.034	474	0.242688	0.678573
		0.1969	549	143	406	286	692	0.413295	0.410256		0.2913	417.143	57.8569	359.286	115.714	475	0.243608	0.679622
		0.1966	550	144	406	288	694	0.414986	0.410256		0.2904	417.803	58.1972	359.606	116.394	476	0.244526	0.680666
		0.1964	551	144	407	288	695	0.414388	0.410256		0.2903	418.462	58.5381	359.924	117.076	477	0.245443	0.681707
		0.1961	552	144	408	288	696	0.413793	0.410256		0.2902	419.121	58.8795	360.241	117.759	478	0.246358	0.682743
		0.1958	553	144	409	288	697	0.413199	0.410256		0.2893	419.779	59.2213	360.557	118.443	479	0.247271	0.683776
		0.1957	554	144	410	288	698	0.412607	0.410256		0.2888	420.436	59.5637	360.873	119.127	480	0.248182	0.684806
		0.1956	555	144	411	288	699	0.412017	0.410256		0.2885	421.093	59.9067	361.187	119.813	481	0.249092	0.685831
		0.1954	556	144	412	288	700	0.411429	0.410256		0.2883	421.75	60.2501	361.5	120.5	482	0.25	0.686853
		0.1948	557	144	413	288	701	0.410842	0.410256		0.2872	422.406	60.594	361.812	121.188	483	0.250907	0.687871
		0.1947	558	144	414	288	702	0.410256	0.410256		0.2862	423.062	60.9385	362.123	121.877	484	0.251812	0.689391
		0.1946	558	145	413	290	703	0.412518	0.412518		0.2862	423.717	61.2834	362.433	122.567	485	0.252715	0.689391
		0.1944	558	146	412	292	704	0.414773	0.414184		0.2858	424.371	61.6289	362.742	123.258	486	0.253617	0.690903
		0.1942	559	146	413	292	705	0.414184	0.414184		0.2857	425.025	61.9748	363.05	123.95	487	0.254517	0.691906
		0.194	559	147	412	294	706	0.416431	0.416431		0.2855	425.679	62.3213	363.357	124.643	488	0.255415	0.693404
		0.1939	559	148	411	296	707	0.41867	0.418079		0.2855	426.332	62.6682	363.664	125.336	489	0.256312	0.693404
		0.1937	560	148	412	296	708	0.418079	0.418079		0.2828	426.984	63.0157	363.969	126.031	490	0.257207	0.694894
		0.1936	560	149	411	298	709	0.42031	0.419128		0.2816	427.636	63.3636	364.273	126.727	491	0.2581	0.696376
		0.1932	562	149	413	298	711	0.419128	0.419128		0.2816	428.288	63.712	364.576	127.424	492	0.258992	0.696376
		0.1928	562	150	412	300	712	0.421348	0.41958		0.2804	428.939	64.061	364.878	128.122	493	0.259882	0.69785
		0.1926	563	150	413	300	713	0.420757	0.41958		0.2798	429.59	64.4104	365.179	128.821	494	0.260771	0.698829
		0.1922	564	150	414	300	714	0.420168	0.41958		0.2792	430.24	64.7603	365.479	129.521	495	0.261658	0.699804
		0.1921	565	150	415	300	715	0.41958	0.41958		0.278	430.889	65.1107	365.779	130.221	496	0.262543	0.700775
		0.1919	565	151	414	302	716	0.421788	0.421788		0.2767	431.538	65.4615	366.077	130.923	497	0.263427	0.701743
		0.1916	565	152	413	304	717	0.423989	0.423398		0.2755	432.187	65.8129	366.374	131.626	498	0.264309	0.702707
		0.1913	566	152	414	304	718	0.423398	0.423398		0.2754	432.835	66.1647	366.671	132.329	499	0.265189	0.703668
		0.1912	566	153	413	306	719	0.425591	0.425591		0.2741	433.483	66.517	366.966	133.034	500	0.266068	0.704625
		0.1911	566	154	412	308	720	0.427778	0.426593		0.2733	434.13	66.8698	367.26	133.74	501	0.266945	0.705579
		0.191	567	154	413	308	721	0.427184	0.426593		0.2732	434.777	67.2231	367.554	134.446	502	0.267821	0.70653
		0.1904	568	154	414	308	722	0.426593	0.426593		0.2729	435.423	67.5768	367.846	135.154	503	0.268695	0.707477
		0.1903	568	155	413	310	723	0.428769	0.427586		0.2727	436.069	67.931	368.138	135.862	504	0.269568	0.708421
		0.19	570	155	415	310	725	0.427586	0.427586		0.2714	436.714	68.2857	368.429	136.571	505	0.270439	0.709362
		0.1896	570	156	414	312	726	0.429752	0.429752		0.2707	437.359	68.6409	368.718	137.282	506	0.271308	0.710299
		0.1895	571	157	414	314	728	0.431319	0.430727		0.2706	438.004	68.9965	369.007	137.993	507	0.272176	0.711233
		0.1892	572	157	415	314	729	0.430727	0.430727		0.2699	438.647	69.3526	369.295	138.705	508	0.273042	0.712164
		0.1889	572	158	414	316	730	0.432877	0.432065		0.2673	439.291	69.7091	369.582	139.418	509	0.273906	0.713091
		0.1887	573	159	414	318	732	0.434426	0.432065		0.2671	439.934	70.0661	369.868	140.132	510	0.274769	0.714015
		0.1886	574	159	415	318	733	0.433834	0.432065		0.2661	440.576	70.4236	370.153	140.847	511	0.275631	0.714936
		0.1881	575	159	416	318	734	0.433243	0.432065		0.2656	441.218	70.7815	370.437	141.563	512	0.27649	0.715853
		0.188	576	159	417	318	735	0.432653	0.432065		0.2646	441.86	71.1399	370.72	142.28	513	0.277349	0.716768
		0.1879	577	159	418	318	736	0.432065	0.432065		0.2641	442.501	71.4987	371.003	142.997	514	0.278205	0.717679
		0.1878	577	160	417	320	737	0.434193	0.433604		0.2625	443.142	71.858	371.284	143.716	515	0.27906	0.719039
		0.1875	578	160	418	320	738	0.433604	0.433604		0.2625	443.782	72.2178	371.564	144.436	516	0.279914	0.719039
		0.1873	579	161	418	322	740	0.435135	0.434548		0.2616	444.422	72.578	371.844	145.156	517	0.280766	0.720393
		0.1872	580	161	419	322	741	0.434548	0.434548		0.261	445.061	72.9386	372.123	145.877	518	0.281616	0.721291
		0.1871	581	162	419	324	743	0.43607	0.43607		0.2602	445.7	73.2997	372.401	146.599	519	0.282465	0.722186
		0.1868	581	163	418	326	744	0.438172	0.438172		0.2577	446.339	73.6613	372.677	147.323	520	0.283313	0.723523
		0.1866	581	164	417	328	745	0.440268	0.439678		0.2577	446.977	74.0232	372.954	148.046	521	0.284158	0.723523
		0.1863	582	164	418	328	746	0.439678	0.439678		0.2566	447.614	74.3857	373.229	148.771	522	0.285003	0.724853
		0.1856	582	165	417	330	747	0.441767	0.441767		0.2562	448.251	74.7485	373.503	149.497	523	0.285845	0.725736
		0.1851	582	166	416	332	748	0.44385	0.442667		0.2561	448.888	75.1118	373.776	150.224	524	0.286686	0.726615
		0.185	584	166	418	332	750	0.442667	0.442667		0.2555	449.524	75.4756	374.049	150.951	525	0.287526	0.727492
		0.1849	584	167	417	334	751	0.44474	0.444149		0.2544	450.16	75.8398	374.32	151.68	526	0.288364	0.728365
		0.1847	585	167	418	334	752	0.444149	0.444149		0.2537	450.796	76.2044	374.591	152.409	527	0.289201	0.729236
		0.1845	585	168	417	336	753	0.446215	0.444152		0.2529	451.431	76.5694	374.861	153.139	528	0.290036	0.730103
		0.1842	586	168	418	336	754	0.445623	0.444152		0.2527	452.065	76.9349	375.13	153.87	529	0.290869	0.730968
		0.1837	586	169	417	338	755	0.447682	0.444152		0.2519	452.699	77.3008	375.398	154.602	530	0.291701	0.731829
		0.1835	587	169	418	338	756	0.44709	0.444152		0.251	453.333	77.6672	375.666	155.334	531	0.292532	0.732687
		0.1834	588	169	419	338	757	0.446499	0.444152		0.2504	453.966	78.034	375.932	156.068	532	0.293361	0.733543
		0.1825	590	169	421	338	759	0.445323	0.444152		0.2492	454.599	78.4012	376.198	156.802	533	0.294188	0.734395
		0.1822	591	169	422	338	760	0.444737	0.444152		0.2489	455.231	78.7688	376.462	157.538	534	0.295014	0.735245
		0.1821	592	169	423	338	761	0.444152	0.444152		0.2486	455.863	79.1368	376.726	158.274	535	0.295839	0.736091
		0.182	592	170	422	340	762	0.446194	0.445026		0.2484	456.495	79.5053	376.989	159.011	536	0.296662	0.736935
		0.1819	594	170	424	340	764	0.445026	0.445026		0.2476	457.126	79.8742	377.252	159.748	537	0.297483	0.737776
		0.1816	594	171	423	342	765	0.447059	0.447059		0.2475	457.757	80.2435	377.513	160.487	538	0.298303	0.738613
		0.1815	594	172	422	344	766	0.449086	0.449086		0.2462	458.387	80.6132	377.774	161.226	539	0.299121	0.739448
		0.1814	594	174	420	348	768	0.453125	0.453125		0.2456	459.017	80.9833	378.033	161.967	540	0.299938	0.74028
		0.1812	594	175	419	350	769	0.455137	0.454194		0.2445	459.646	81.3539	378.292	162.708	541	0.300754	0.741109
		0.1809	595	175	420	350	770	0.454545	0.454194		0.2438	460.275	81.7249	378.55	163.45	542	0.301568	0.741936
		0.1808	595	176	419	352	771	0.45655	0.454194		0.2434	460.904	82.0962	378.808	164.192	543	0.30238	0.742759
		0.1807	596	176	420	352	772	0.455959	0.454194		0.2428	461.532	82.468	379.064	164.936	544	0.303191	0.74358
		0.1804	597	176	421	352	773	0.455369	0.454194		0.242	462.16	82.8402	379.32	165.68	545	0.304001	0.744397
		0.1802	599	176	423	352	775	0.454194	0.454194		0.2401	462.787	83.2128	379.574	166.426	546	0.304809	0.745212
		0.18	600	177	423	354	777	0.455598	0.455598		0.2382	463.414	83.5859	379.828	167.172	547	0.305616	0.746025
		0.1798	600	178	422	356	778	0.457584	0.457584		0.2379	464.041	83.9593	380.081	167.919	548	0.306421	0.746834
		0.1797	600	179	421	358	779	0.459564	0.459564		0.2377	464.667	84.3331	380.334	168.666	549	0.307224	0.747641
		0.1796	600	181	419	362	781	0.463508	0.462916		0.2375	465.293	84.7073	380.585	169.415	550	0.308027	0.748444
		0.1792	601	181	420	362	782	0.462916	0.462916		0.2371	465.918	85.0819	380.836	170.164	551	0.308827	0.749246
		0.1791	601	182	419	364	783	0.464879	0.464286		0.2367	466.543	85.457	381.086	170.914	552	0.309627	0.750044
		0.179	602	182	420	364	784	0.464286	0.464286		0.2365	467.168	85.8324	381.335	171.665	553	0.310425	0.75084
		0.1789	602	183	419	366	785	0.466242	0.466242		0.2363	467.792	86.2082	381.584	172.416	554	0.311221	0.751632
		0.1786	602	184	418	368	786	0.468193	0.467005		0.2362	468.416	86.5844	381.831	173.169	555	0.312016	0.752423
		0.1785	603	184	419	368	787	0.467598	0.467005		0.2361	469.039	86.961	382.078	173.922	556	0.312809	0.75321
		0.1784	604	184	420	368	788	0.467005	0.467005		0.2357	469.662	87.338	382.324	174.676	557	0.313601	0.753995
		0.1783	604	185	419	370	789	0.468948	0.467762		0.2355	470.285	87.7154	382.569	175.431	558	0.314392	0.754777
		0.1782	605	185	420	370	790	0.468354	0.467762		0.2351	470.907	88.0932	382.814	176.186	559	0.315181	0.755557
		0.1779	606	185	421	370	791	0.467762	0.467762		0.2347	471.529	88.4713	383.057	176.943	560	0.315969	0.756333
		0.1775	607	186	421	372	793	0.469105	0.469105		0.2345	472.15	88.8499	383.3	177.7	561	0.316755	0.757108
		0.1774	607	187	420	374	794	0.471033	0.46926		0.2343	472.771	89.2288	383.542	178.458	562	0.31754	0.757879
		0.1773	609	187	422	374	796	0.469849	0.46926		0.2342	473.392	89.6082	383.784	179.216	563	0.318324	0.758648
		0.1769	610	187	423	374	797	0.46926	0.46926		0.2339	474.012	89.9879	384.024	179.976	564	0.319106	0.759415
		0.1768	610	188	422	376	798	0.471178	0.471178		0.2334	474.632	90.368	384.264	180.736	565	0.319887	0.760178
		0.1766	610	189	421	378	799	0.473091	0.47191		0.2325	475.252	90.7484	384.503	181.497	566	0.320666	0.760939
		0.1761	611	189	422	378	800	0.4725	0.47191		0.2323	475.871	91.1293	384.741	182.259	567	0.321444	0.761698
		0.176	612	189	423	378	801	0.47191	0.47191		0.2321	476.489	91.5105	384.979	183.021	568	0.32222	0.762454
		0.1759	612	190	422	380	802	0.473815	0.472637		0.2317	477.108	91.8921	385.216	183.784	569	0.322995	0.763208
		0.1757	613	190	423	380	803	0.473225	0.472637		0.2312	477.726	92.2741	385.452	184.548	570	0.323769	0.763959
		0.1756	614	190	424	380	804	0.472637	0.472637		0.2308	478.344	92.6564	385.687	185.313	571	0.324541	0.764707
		0.1753	614	192	422	384	806	0.476427	0.475248		0.2303	478.961	93.0392	385.922	186.078	572	0.325312	0.765825
		0.1749	616	192	424	384	808	0.475248	0.475248		0.2303	479.578	93.4223	386.155	186.845	573	0.326081	0.765825
		0.1748	617	193	424	386	810	0.476543	0.475956		0.2302	480.194	93.8057	386.389	187.611	574	0.326849	0.766937
		0.1746	618	193	425	386	811	0.475956	0.475956		0.2299	480.81	94.1896	386.621	188.379	575	0.327616	0.767675
		0.1744	618	194	424	388	812	0.477833	0.477245		0.2294	481.426	94.5738	386.852	189.148	576	0.328381	0.768411
		0.1742	619	194	425	388	813	0.477245	0.477245		0.2291	482.042	94.9583	387.083	189.917	577	0.329145	0.769145
		0.1741	619	195	424	390	814	0.479115	0.478528		0.229	482.657	95.3433	387.313	190.687	578	0.329908	0.769876
		0.1739	620	195	425	390	815	0.478528	0.478528		0.2285	483.271	95.7286	387.543	191.457	579	0.330669	0.770604
		0.1736	620	197	423	394	817	0.482252	0.482252		0.2282	483.886	96.1143	387.771	192.229	580	0.331428	0.771693
		0.1734	620	198	422	396	818	0.484108	0.484108		0.2282	484.5	96.5003	387.999	193.001	581	0.332187	0.771693
		0.173	620	199	421	398	819	0.485958	0.485958		0.2281	485.113	96.8867	388.227	193.773	582	0.332944	0.772775
		0.1729	622	200	422	400	822	0.486618	0.486618		0.2276	485.727	97.2734	388.453	194.547	583	0.3337	0.773853
		0.1724	623	201	422	402	824	0.487864	0.487395		0.2276	486.339	97.6605	388.679	195.321	584	0.334454	0.773853
		0.1723	624	202	422	404	826	0.489104	0.487395		0.2269	486.952	98.048	388.904	196.096	585	0.335207	0.774925
		0.172	624	203	421	406	827	0.490931	0.487395		0.2267	487.564	98.4358	389.128	196.872	586	0.335958	0.775991
		0.1714	625	203	422	406	828	0.490338	0.487395		0.2267	488.176	98.824	389.352	197.648	587	0.336709	0.775991
		0.1712	626	203	423	406	829	0.489747	0.487395		0.2262	488.788	99.2125	389.575	198.425	588	0.337457	0.777053
		0.1711	628	203	425	406	831	0.488568	0.487395		0.2261	489.399	99.6014	389.797	199.203	589	0.338205	0.777757
		0.1705	629	203	426	406	832	0.487981	0.487395		0.2253	490.009	99.9906	390.019	199.981	590	0.338951	0.778459
		0.1703	630	203	427	406	833	0.487395	0.487395		0.2248	490.62	100.38	390.24	200.76	591	0.339696	0.779159
		0.1701	630	204	426	408	834	0.489209	0.489209		0.2243	491.23	100.77	390.46	201.54	592	0.34044	0.779857
		0.1699	631	205	426	410	836	0.490431	0.490431		0.2241	491.84	101.16	390.679	202.321	593	0.341182	0.780552
		0.1696	631	206	425	412	837	0.492234	0.492234		0.2238	492.449	101.551	390.898	203.102	594	0.341923	0.781245
		0.1695	631	207	424	414	838	0.494033	0.494033		0.2234	493.058	101.942	391.116	203.884	595	0.342662	0.781936
		0.1693	631	208	423	416	839	0.495828	0.494649		0.2229	493.667	102.333	391.333	204.667	596	0.3434	0.782624
		0.1691	632	208	424	416	840	0.495238	0.494649		0.2224	494.275	102.725	391.55	205.45	597	0.344137	0.783311
		0.169	633	208	425	416	841	0.494649	0.494649		0.2223	494.883	103.117	391.766	206.234	598	0.344873	0.783995
		0.1687	633	210	423	420	843	0.498221	0.496454		0.2221	495.491	103.509	391.981	207.019	599	0.345607	0.784676
		0.1685	635	210	425	420	845	0.497041	0.496454		0.2214	496.098	103.902	392.196	207.804	600	0.34634	0.785356
		0.1684	636	210	426	420	846	0.496454	0.496454		0.221	496.705	104.295	392.41	208.59	601	0.347071	0.786033
		0.1675	636	211	425	422	847	0.498229	0.498229		0.2199	497.312	104.688	392.623	209.377	602	0.347802	0.786708
		0.1674	636	212	424	424	848	0.5	0.5		0.2198	497.918	105.082	392.836	210.164	603	0.348531	0.78738
		0.1669	637	213	424	426	850	0.501176	0.5		0.2194	498.524	105.476	393.048	210.952	604	0.349258	0.788051
		0.1668	639	213	426	426	852	0.5	0.5		0.2188	499.13	105.87	393.259	211.741	605	0.349985	0.788719
		0.1665	640	214	426	428	854	0.501171	0.501155		0.2183	499.735	106.265	393.47	212.53	606	0.35071	0.789385
		0.1662	642	215	427	430	857	0.50175	0.501155		0.2182	500.34	106.66	393.68	213.32	607	0.351434	0.790049
		0.166	643	216	427	432	859	0.50291	0.501155		0.2178	500.945	107.055	393.889	214.111	608	0.352156	0.791041
		0.1658	645	216	429	432	861	0.501742	0.501155		0.2178	501.549	107.451	394.098	214.902	609	0.352877	0.791041
		0.1657	645	217	428	434	862	0.50348	0.501155		0.2177	502.153	107.847	394.306	215.694	610	0.353597	0.792028
		0.1655	646	217	429	434	863	0.502897	0.501155		0.2175	502.756	108.244	394.513	216.487	611	0.354316	0.792683
		0.1652	647	217	430	434	864	0.502315	0.501155		0.2167	503.36	108.64	394.72	217.28	612	0.355033	0.793336
		0.1648	648	217	431	434	865	0.501734	0.501155		0.2162	503.963	109.037	394.926	218.074	613	0.355749	0.793987
		0.1647	649	217	432	434	866	0.501155	0.501155		0.2159	504.566	109.434	395.131	218.869	614	0.356464	0.794636
		0.1641	649	218	431	436	867	0.502884	0.502304		0.2157	505.168	109.832	395.336	219.664	615	0.357178	0.795606
		0.1639	650	218	432	436	868	0.502304	0.502304		0.2157	505.77	110.23	395.54	220.46	616	0.35789	0.795606
		0.1638	650	219	431	438	869	0.504028	0.504028		0.2155	506.372	110.628	395.743	221.257	617	0.358601	0.79657
		0.1637	650	221	429	442	871	0.507463	0.506881		0.2151	506.973	111.027	395.946	222.054	618	0.359311	0.797211
		0.1633	651	221	430	442	872	0.506881	0.506881		0.2146	507.574	111.426	396.148	222.852	619	0.360019	0.797849
		0.1631	651	222	429	444	873	0.508591	0.508591		0.2145	508.175	111.825	396.35	223.65	620	0.360726	0.798486
		0.1626	651	223	428	446	874	0.510297	0.509132		0.2142	508.775	112.225	396.551	224.449	621	0.361432	0.79912
		0.1624	653	223	430	446	876	0.509132	0.509132		0.214	509.375	112.625	396.751	225.249	622	0.362137	0.800067
		0.162	654	224	430	448	878	0.510251	0.510251		0.214	509.975	113.025	396.95	226.05	623	0.36284	0.800067
		0.1619	655	225	430	450	880	0.511364	0.510734		0.2133	510.575	113.425	397.149	226.851	624	0.363543	0.80101
		0.1618	656	226	430	452	882	0.512472	0.510734		0.2129	511.174	113.826	397.348	227.652	625	0.364244	0.801637
		0.1615	657	226	431	452	883	0.511891	0.510734		0.2124	511.773	114.227	397.546	228.454	626	0.364943	0.802261
		0.1614	659	226	433	452	885	0.510734	0.510734		0.2121	512.371	114.629	397.743	229.257	627	0.365642	0.803193
		0.1608	659	227	432	454	886	0.512415	0.512415		0.2121	512.97	115.03	397.939	230.061	628	0.366339	0.803193
		0.1601	659	228	431	456	887	0.514092	0.514092		0.2118	513.568	115.432	398.135	230.865	629	0.367035	0.804121
		0.1599	659	229	430	458	888	0.515766	0.515419		0.2117	514.165	115.835	398.33	231.67	630	0.36773	0.804737
		0.1597	659	230	429	460	889	0.517435	0.515419		0.2112	514.762	116.238	398.525	232.475	631	0.368423	0.805351
		0.1595	659	231	428	462	890	0.519101	0.515419		0.211	515.359	116.641	398.719	233.281	632	0.369116	0.805963
		0.1593	660	232	428	464	892	0.520179	0.515419		0.2109	515.956	117.044	398.912	234.088	633	0.369807	0.806574
		0.1592	661	232	429	464	893	0.519597	0.515419		0.2107	516.553	117.447	399.105	234.895	634	0.370497	0.807182
		0.1588	662	232	430	464	894	0.519016	0.515419		0.2101	517.149	117.851	399.297	235.703	635	0.371185	0.808393
		0.1586	663	232	431	464	895	0.518436	0.515419		0.2101	517.745	118.255	399.489	236.511	636	0.371873	0.808393
		0.1578	663	233	430	466	896	0.520089	0.515419		0.2101	518.34	118.66	399.68	237.32	637	0.372559	0.808393
		0.1577	666	233	433	466	899	0.518354	0.515419		0.2099	518.935	119.065	399.87	238.13	638	0.373244	0.809596
		0.1575	667	233	434	466	900	0.517778	0.515419		0.2095	519.53	119.47	400.06	238.94	639	0.373928	0.810194
		0.1571	668	233	435	466	901	0.517203	0.515419		0.2092	520.125	119.875	400.249	239.751	640	0.37461	0.810791
		0.1569	669	233	436	466	902	0.51663	0.515419		0.2091	520.719	120.281	400.438	240.562	641	0.375292	0.811386
		0.1565	670	234	436	468	904	0.517699	0.515419		0.2089	521.313	120.687	400.626	241.374	642	0.375972	0.81257
		0.1562	671	234	437	468	905	0.517127	0.515419		0.2089	521.907	121.093	400.814	242.186	643	0.376651	0.81257
		0.1559	672	234	438	468	906	0.516556	0.515419		0.2089	522.5	121.5	401	243	644	0.377329	0.81257
		0.1558	673	234	439	468	907	0.515987	0.515419		0.2088	523.093	121.907	401.187	243.813	645	0.378005	0.814039
		0.1555	674	234	440	468	908	0.515419	0.515419		0.2088	523.686	122.314	401.372	244.628	646	0.378681	0.814039
		0.1552	674	235	439	470	909	0.517052	0.516484		0.2083	524.279	122.721	401.557	245.443	647	0.379355	0.814915
		0.1549	675	235	440	470	910	0.516484	0.516484		0.2079	524.871	123.129	401.742	246.258	648	0.380028	0.815497
		0.1548	675	236	439	472	911	0.518112	0.518112		0.2078	525.463	123.537	401.926	247.074	649	0.3807	0.816076
		0.1547	675	237	438	474	912	0.519737	0.519737		0.2077	526.055	123.945	402.109	247.891	650	0.381371	0.816654
		0.1546	675	238	437	476	913	0.521358	0.520219		0.2074	526.646	124.354	402.292	248.708	651	0.38204	0.817231
		0.1543	676	238	438	476	914	0.520788	0.520219		0.2071	527.237	124.763	402.474	249.526	652	0.382708	0.817805
		0.154	677	238	439	476	915	0.520219	0.520219		0.207	527.828	125.172	402.656	250.344	653	0.383376	0.818377
		0.1538	678	239	439	478	917	0.521265	0.520697		0.2065	528.418	125.582	402.837	251.163	654	0.384042	0.819801
		0.1537	679	239	440	478	918	0.520697	0.520697		0.2065	529.009	125.991	403.017	251.983	655	0.384706	0.819801
		0.1535	680	240	440	480	920	0.521739	0.521739		0.2065	529.599	126.401	403.197	252.803	656	0.38537	0.819801
		0.1531	680	241	439	482	921	0.523344	0.523344		0.2065	530.188	126.812	403.377	253.623	657	0.386033	0.819801
		0.1528	680	242	438	484	922	0.524946	0.524211		0.2063	530.778	127.222	403.555	254.445	658	0.386694	0.821213
		0.1525	681	243	438	486	924	0.525974	0.524211		0.2062	531.367	127.633	403.734	255.266	659	0.387354	0.821775
		0.1523	681	244	437	488	925	0.527568	0.524211		0.2059	531.956	128.044	403.911	256.089	660	0.388013	0.822335
		0.1522	682	244	438	488	926	0.526998	0.524211		0.2053	532.544	128.456	404.088	256.912	661	0.388671	0.823172
		0.1519	682	245	437	490	927	0.528587	0.524211		0.2053	533.132	128.868	404.265	257.735	662	0.389328	0.823172
		0.1518	683	245	438	490	928	0.528017	0.524211		0.2049	533.72	129.28	404.441	258.559	663	0.389984	0.824005
		0.1516	684	245	439	490	929	0.527449	0.524211		0.2042	534.308	129.692	404.616	259.384	664	0.390638	0.824558
		0.1515	685	245	440	490	930	0.526882	0.524211		0.2041	534.896	130.104	404.791	260.209	665	0.391291	0.825109
		0.1513	685	246	439	492	931	0.528464	0.524211		0.204	535.483	130.517	404.966	261.034	666	0.391944	0.825659
		0.1511	686	246	440	492	932	0.527897	0.524211		0.2034	536.07	130.93	405.139	261.861	667	0.392595	0.826207
		0.1509	687	246	441	492	933	0.527331	0.524211		0.2029	536.656	131.344	405.313	262.687	668	0.393245	0.826753
		0.1507	688	246	442	492	934	0.526767	0.524211		0.2028	537.243	131.757	405.485	263.515	669	0.393893	0.827298
		0.1504	689	246	443	492	935	0.526203	0.524211		0.2024	537.829	132.171	405.657	264.343	670	0.394541	0.827841
		0.1502	690	247	443	494	937	0.527215	0.524211		0.2022	538.415	132.585	405.829	265.171	671	0.395188	0.828382
		0.1498	691	247	444	494	938	0.526652	0.524211		0.2019	539	133	406	266	672	0.395833	0.828921
		0.1497	693	247	446	494	940	0.525532	0.524211		0.2017	539.585	133.415	406.171	266.829	673	0.396477	0.829459
		0.1495	694	247	447	494	941	0.524973	0.524211		0.2015	540.17	133.83	406.341	267.659	674	0.397121	0.829995
		0.1491	695	247	448	494	942	0.524416	0.524211		0.2009	540.755	134.245	406.51	268.49	675	0.397763	0.830796
		0.1486	695	248	447	496	943	0.525981	0.524211		0.2009	541.34	134.66	406.679	269.321	676	0.398404	0.830796
		0.1485	696	248	448	496	944	0.525424	0.524211		0.2002	541.924	135.076	406.847	270.153	677	0.399044	0.831594
		0.1484	697	248	449	496	945	0.524868	0.524211		0.2	542.508	135.492	407.015	270.985	678	0.399682	0.832123
		0.1483	698	248	450	496	946	0.524313	0.524211		0.1995	543.091	135.909	407.183	271.817	679	0.40032	0.832651
		0.1482	699	249	450	498	948	0.525316	0.524211		0.199	543.675	136.325	407.35	272.65	680	0.400957	0.833177
		0.1481	700	249	451	498	949	0.524763	0.524211		0.1989	544.258	136.742	407.516	273.484	681	0.401592	0.833702
		0.1479	701	249	452	498	950	0.524211	0.524211		0.1988	544.841	137.159	407.682	274.318	682	0.402226	0.834225
		0.1469	702	250	452	500	952	0.52521	0.524659		0.1982	545.423	137.577	407.847	275.153	683	0.40286	0.835007
		0.1468	703	250	453	500	953	0.524659	0.524659		0.1982	546.006	137.994	408.012	275.988	684	0.403492	0.835007
		0.1464	703	251	452	502	954	0.526205	0.52588		0.1978	546.588	138.412	408.176	276.824	685	0.404123	0.836043
		0.1462	705	253	452	506	958	0.528184	0.52588		0.1978	547.17	138.83	408.34	277.66	686	0.404753	0.836043
		0.1459	706	253	453	506	959	0.527633	0.52588		0.1977	547.751	139.249	408.503	278.497	687	0.405382	0.836816
		0.1455	707	253	454	506	960	0.527083	0.52588		0.1974	548.333	139.667	408.665	279.335	688	0.40601	0.837586
		0.1454	707	254	453	508	961	0.528616	0.52588		0.1974	548.914	140.086	408.828	280.172	689	0.406636	0.837586
		0.1453	708	254	454	508	962	0.528067	0.52588		0.1972	549.495	140.505	408.989	281.011	690	0.407262	0.838606
		0.1449	709	254	455	508	963	0.527518	0.52588		0.1972	550.075	140.925	409.15	281.85	691	0.407887	0.838606
		0.1444	710	254	456	508	964	0.526971	0.52588		0.1969	550.655	141.345	409.311	282.689	692	0.40851	0.839368
		0.1441	712	254	458	508	966	0.52588	0.52588		0.1966	551.236	141.764	409.471	283.529	693	0.409133	0.840126
		0.144	712	255	457	510	967	0.527404	0.526316		0.1966	551.815	142.185	409.631	284.369	694	0.409754	0.840126
		0.1438	713	255	458	510	968	0.52686	0.526316		0.1964	552.395	142.605	409.79	285.21	695	0.410374	0.84088
		0.1431	714	255	459	510	969	0.526316	0.526316		0.1961	552.974	143.026	409.948	286.052	696	0.410994	0.841381
		0.143	714	256	458	512	970	0.527835	0.527291		0.1958	553.553	143.447	410.107	286.893	697	0.411612	0.841881
		0.1429	715	256	459	512	971	0.527291	0.527291		0.1957	554.132	143.868	410.264	287.736	698	0.412229	0.842379
		0.1428	716	257	459	514	973	0.528263	0.528263		0.1956	554.711	144.289	410.421	288.579	699	0.412845	0.842875
		0.1426	716	258	458	516	974	0.529774	0.529774		0.1954	555.289	144.711	410.578	289.422	700	0.41346	0.84337
		0.1421	716	259	457	518	975	0.531282	0.530902		0.1948	555.867	145.133	410.734	290.266	701	0.414074	0.843864
		0.1417	716	260	456	520	976	0.532787	0.530902		0.1947	556.445	145.555	410.89	291.11	702	0.414687	0.844356
		0.1416	717	260	457	520	977	0.532242	0.530902		0.1946	557.022	145.978	411.045	291.955	703	0.415299	0.844847
		0.1414	718	260	458	520	978	0.531697	0.530902		0.1944	557.6	146.4	411.2	292.8	704	0.41591	0.845336
		0.1406	719	260	459	520	979	0.531154	0.530902		0.1942	558.177	146.823	411.354	293.646	705	0.41652	0.845823
		0.1403	720	261	459	522	981	0.53211	0.530902		0.194	558.754	147.246	411.507	294.493	706	0.417128	0.846309
		0.14	721	261	460	522	982	0.531568	0.530902		0.1939	559.33	147.67	411.661	295.339	707	0.417736	0.846794
		0.1397	722	261	461	522	983	0.531027	0.530902		0.1937	559.907	148.093	411.813	296.187	708	0.418343	0.847277
		0.1394	722	262	460	524	984	0.53252	0.530902		0.1936	560.483	148.517	411.966	297.034	709	0.418948	0.847759
		0.1391	723	262	461	524	985	0.53198	0.530902		0.1932	561.059	148.941	412.117	297.883	710	0.419553	0.848479
		0.1389	724	262	462	524	986	0.53144	0.530902		0.1932	561.634	149.366	412.269	298.731	711	0.420157	0.848479
		0.1385	725	262	463	524	987	0.530902	0.530902		0.1928	562.21	149.79	412.419	299.581	712	0.420759	0.849195
		0.1378	725	263	462	526	988	0.532389	0.532389		0.1926	562.785	150.215	412.57	300.43	713	0.421361	0.849671
		0.1375	725	264	461	528	989	0.533873	0.533873		0.1922	563.36	150.64	412.72	301.28	714	0.421961	0.850146
		0.1372	725	265	460	530	990	0.535354	0.535354		0.1921	563.934	151.066	412.869	302.131	715	0.422561	0.850619
		0.1368	725	266	459	532	991	0.536831	0.536831		0.1919	564.509	151.491	413.018	302.982	716	0.423159	0.851091
		0.1361	725	267	458	534	992	0.538306	0.537764		0.1916	565.083	151.917	413.166	303.834	717	0.423757	0.851561
		0.1359	726	267	459	534	993	0.537764	0.537764		0.1913	565.657	152.343	413.314	304.686	718	0.424353	0.85203
		0.1358	726	268	458	536	994	0.539235	0.539235		0.1912	566.231	152.769	413.462	305.538	719	0.424949	0.852497
		0.1357	726	269	457	538	995	0.540704	0.540704		0.1911	566.804	153.196	413.609	306.391	720	0.425543	0.852963
		0.1356	726	270	456	540	996	0.542169	0.542169		0.191	567.378	153.622	413.755	307.245	721	0.426137	0.853428
		0.1354	726	271	455	542	997	0.543631	0.543631		0.1904	567.951	154.049	413.902	308.098	722	0.426729	0.853891
		0.1349	726	272	454	544	998	0.54509	0.544		0.1903	568.524	154.476	414.047	308.953	723	0.427321	0.854353
		0.1347	727	272	455	544	999	0.544545	0.544		0.19	569.096	154.904	414.192	309.808	724	0.427911	0.855044
		0.1346	728	272	456	544	1000	0.544	0.544		0.19	569.669	155.331	414.337	310.663	725	0.428501	0.855044
		0.1345	729	273	456	546	1002	0.54491	0.54491		0.1896	570.241	155.759	414.481	311.519	726	0.429089	0.855731
		0.1343	729	274	455	548	1003	0.546361	0.546361		0.1895	570.813	156.187	414.625	312.375	727	0.429677	0.856415
		0.1342	729	275	454	550	1004	0.547809	0.547809		0.1895	571.384	156.616	414.769	313.231	728	0.430263	0.856415
		0.1338	729	276	453	552	1005	0.549254	0.549254		0.1892	571.956	157.044	414.911	314.089	729	0.430849	0.857096
		0.1327	730	277	453	554	1007	0.550149	0.549754		0.1889	572.527	157.473	415.054	314.946	730	0.431433	0.857549
		0.1319	730	278	452	556	1008	0.551587	0.549754		0.1887	573.098	157.902	415.196	315.804	731	0.432017	0.858225
		0.1316	732	278	454	556	1010	0.550495	0.549754		0.1887	573.669	158.331	415.337	316.663	732	0.432599	0.858225
		0.1314	733	279	454	558	1012	0.551383	0.549754		0.1886	574.239	158.761	415.479	317.521	733	0.433181	0.858898
		0.1311	734	279	455	558	1013	0.550839	0.549754		0.1881	574.81	159.19	415.619	318.381	734	0.433761	0.859345
		0.1305	735	279	456	558	1014	0.550296	0.549754		0.188	575.38	159.62	415.759	319.241	735	0.434341	0.859791
		0.1303	736	279	457	558	1015	0.549754	0.549754		0.1879	575.95	160.05	415.899	320.101	736	0.43492	0.860235
		0.1301	738	280	458	560	1018	0.550098	0.550098		0.1878	576.519	160.481	416.038	320.962	737	0.435497	0.860678
		0.1296	738	281	457	562	1019	0.551521	0.550781		0.1875	577.089	160.911	416.177	321.823	738	0.436074	0.86112
		0.129	739	281	458	562	1020	0.55098	0.550781		0.1873	577.658	161.342	416.316	322.684	739	0.43665	0.861781
		0.1286	739	282	457	564	1021	0.5524	0.550781		0.1873	578.227	161.773	416.454	323.546	740	0.437225	0.861781
		0.1285	740	282	458	564	1022	0.551859	0.550781		0.1872	578.796	162.204	416.591	324.409	741	0.437798	0.862438
		0.1282	741	282	459	564	1023	0.55132	0.550781		0.1871	579.364	162.636	416.728	325.272	742	0.438371	0.863093
		0.1281	742	282	460	564	1024	0.550781	0.550781		0.1871	579.933	163.067	416.865	326.135	743	0.438943	0.863093
		0.128	742	283	459	566	1025	0.552195	0.552195		0.1868	580.501	163.499	417.001	326.999	744	0.439514	0.863745
		0.1278	742	284	458	568	1026	0.553606	0.553067		0.1866	581.069	163.931	417.137	327.863	745	0.440084	0.864177
		0.1276	743	284	459	568	1027	0.553067	0.553067		0.1863	581.636	164.364	417.273	328.727	746	0.440653	0.864609
		0.1273	743	285	458	570	1028	0.554475	0.554475		0.1856	582.204	164.796	417.408	329.592	747	0.441221	0.865039
		0.1269	743	286	457	572	1029	0.555879	0.555879		0.1851	582.771	165.229	417.542	330.458	748	0.441789	0.865469
		0.1267	743	287	456	574	1030	0.557282	0.556741		0.185	583.338	165.662	417.676	331.324	749	0.442355	0.86611
		0.1266	744	287	457	574	1031	0.556741	0.556741		0.185	583.905	166.095	417.81	332.19	750	0.44292	0.86611
		0.1265	745	288	457	576	1033	0.557599	0.557599		0.1849	584.472	166.528	417.943	333.057	751	0.443484	0.866748
		0.1263	745	289	456	578	1034	0.558994	0.558994		0.1847	585.038	166.962	418.076	333.924	752	0.444048	0.867173
		0.1261	745	290	455	580	1035	0.560386	0.560386		0.1845	585.604	167.396	418.208	334.792	753	0.44461	0.867596
		0.126	746	291	455	582	1037	0.561234	0.560694		0.1842	586.17	167.83	418.34	335.66	754	0.445172	0.868017
		0.1259	747	291	456	582	1038	0.560694	0.560694		0.1837	586.736	168.264	418.472	336.528	755	0.445733	0.868438
		0.1256	747	292	455	584	1039	0.562079	0.562079		0.1835	587.302	168.698	418.603	337.397	756	0.446292	0.868857
		0.1254	747	293	454	586	1040	0.563462	0.56338		0.1834	587.867	169.133	418.734	338.266	757	0.446851	0.869275
		0.1253	747	294	453	588	1041	0.564841	0.56338		0.1825	588.432	169.568	418.864	339.136	758	0.447409	0.8699
		0.1252	747	295	452	590	1042	0.566219	0.56338		0.1825	588.997	170.003	418.994	340.006	759	0.447966	0.8699
		0.1251	749	295	454	590	1044	0.565134	0.56338		0.1822	589.562	170.438	419.123	340.877	760	0.448522	0.870522
		0.1249	750	295	455	590	1045	0.564593	0.56338		0.1821	590.126	170.874	419.253	341.747	761	0.449077	0.870935
		0.1248	750	296	454	592	1046	0.565966	0.56338		0.182	590.691	171.309	419.381	342.619	762	0.449631	0.871347
		0.124	751	296	455	592	1047	0.565425	0.56338		0.1819	591.255	171.745	419.509	343.491	763	0.450184	0.871963
		0.1239	752	296	456	592	1048	0.564885	0.56338		0.1819	591.819	172.181	419.637	344.363	764	0.450737	0.871963
		0.1237	752	297	455	594	1049	0.566254	0.56338		0.1816	592.382	172.618	419.765	345.235	765	0.451288	0.872576
		0.1236	753	297	456	594	1050	0.565714	0.56338		0.1815	592.946	173.054	419.892	346.108	766	0.451838	0.872984
		0.1235	754	297	457	594	1051	0.565176	0.56338		0.1814	593.509	173.491	420.018	346.982	767	0.452388	0.873592
		0.1228	755	298	457	596	1053	0.566002	0.56338		0.1814	594.072	173.928	420.145	347.855	768	0.452937	0.873592
		0.1227	757	298	459	596	1055	0.564929	0.56338		0.1812	594.635	174.365	420.27	348.73	769	0.453485	0.874199
		0.1226	757	299	458	598	1056	0.566288	0.56338		0.1809	595.198	174.802	420.396	349.604	770	0.454032	0.874601
		0.1219	758	299	459	598	1057	0.565752	0.56338		0.1808	595.76	175.24	420.521	350.479	771	0.454578	0.875003
		0.1217	759	299	460	598	1058	0.565217	0.56338		0.1807	596.323	175.677	420.645	351.355	772	0.455123	0.875403
		0.1216	760	299	461	598	1059	0.564684	0.56338		0.1804	596.885	176.115	420.77	352.23	773	0.455667	0.875803
		0.1215	762	299	463	598	1061	0.563619	0.56338		0.1802	597.447	176.553	420.893	353.107	774	0.45621	0.876399
		0.1214	764	300	464	600	1064	0.56391	0.56338		0.1802	598.008	176.992	421.017	353.983	775	0.456753	0.876399
		0.1211	765	300	465	600	1065	0.56338	0.56338		0.18	598.57	177.43	421.14	354.86	776	0.457294	0.877191
		0.121	765	301	464	602	1066	0.564728	0.56367		0.18	599.131	177.869	421.262	355.738	777	0.457835	0.877191
		0.1208	766	301	465	602	1067	0.564199	0.56367		0.1798	599.692	178.308	421.385	356.615	778	0.458375	0.877782
		0.1207	767	301	466	602	1068	0.56367	0.56367		0.1797	600.253	178.747	421.506	357.494	779	0.458913	0.878174
		0.1202	767	302	465	604	1069	0.565014	0.563959		0.1796	600.814	179.186	421.628	358.372	780	0.459452	0.878761
		0.1201	769	302	467	604	1071	0.563959	0.563959		0.1796	601.374	179.626	421.749	359.251	781	0.459989	0.878761
		0.1199	770	303	467	606	1073	0.564772	0.564246		0.1792	601.935	180.065	421.87	360.13	782	0.460525	0.879345
		0.1197	771	303	468	606	1074	0.564246	0.564246		0.1791	602.495	180.505	421.99	361.01	783	0.46106	0.879733
		0.1194	772	304	468	608	1076	0.565056	0.564531		0.179	603.055	180.945	422.11	361.89	784	0.461595	0.88012
		0.1192	773	304	469	608	1077	0.564531	0.564531		0.1789	603.615	181.385	422.229	362.771	785	0.462128	0.880506
		0.1191	773	305	468	610	1078	0.565863	0.565863		0.1786	604.174	181.826	422.348	363.652	786	0.462661	0.880891
		0.1189	773	306	467	612	1079	0.567192	0.567192		0.1785	604.733	182.267	422.467	364.533	787	0.463193	0.881274
		0.1188	773	308	465	616	1081	0.569843	0.568537		0.1784	605.293	182.707	422.585	365.415	788	0.463724	0.881657
		0.1184	774	308	466	616	1082	0.569316	0.568537		0.1783	605.852	183.148	422.703	366.297	789	0.464254	0.882039
		0.1182	775	308	467	616	1083	0.56879	0.568537		0.1782	606.41	183.59	422.821	367.179	790	0.464784	0.882419
		0.1175	778	309	469	618	1087	0.568537	0.568537		0.1779	606.969	184.031	422.938	368.062	791	0.465312	0.882798
		0.1174	778	310	468	620	1088	0.569853	0.569853		0.1775	607.527	184.473	423.055	368.945	792	0.46584	0.883365
		0.1173	778	311	467	622	1089	0.571166	0.570119		0.1775	608.086	184.914	423.171	369.829	793	0.466367	0.883365
		0.1169	780	311	469	622	1091	0.570119	0.570119		0.1774	608.644	185.356	423.287	370.713	794	0.466892	0.88393
		0.1166	781	312	469	624	1093	0.570906	0.570391		0.1773	609.202	185.798	423.403	371.597	795	0.467417	0.884492
		0.1163	781	314	467	628	1095	0.573516	0.570391		0.1773	609.759	186.241	423.518	372.482	796	0.467942	0.884492
		0.1162	782	314	468	628	1096	0.572993	0.570391		0.1769	610.317	186.683	423.633	373.367	797	0.468465	0.885052
		0.1159	783	314	469	628	1097	0.57247	0.570391		0.1768	610.874	187.126	423.748	374.252	798	0.468988	0.885424
		0.1156	784	314	470	628	1098	0.571949	0.570391		0.1766	611.431	187.569	423.862	375.138	799	0.469509	0.885795
		0.1155	785	314	471	628	1099	0.571429	0.570391		0.1761	611.988	188.012	423.976	376.024	800	0.47003	0.886165
		0.1152	786	314	472	628	1100	0.570909	0.570391		0.176	612.545	188.455	424.089	376.911	801	0.47055	0.886534
		0.1151	787	314	473	628	1101	0.570391	0.570391		0.1759	613.101	188.899	424.203	377.797	802	0.471069	0.886902
		0.1149	787	315	472	630	1102	0.571688	0.571688		0.1757	613.658	189.342	424.315	378.685	803	0.471587	0.887269
		0.1148	787	316	471	632	1103	0.572983	0.572983		0.1756	614.214	189.786	424.428	379.572	804	0.472105	0.887635
		0.1146	787	317	470	634	1104	0.574275	0.573237		0.1753	614.77	190.23	424.54	380.46	805	0.472622	0.888182
		0.1145	788	317	471	634	1105	0.573756	0.573237		0.1753	615.326	190.674	424.651	381.349	806	0.473137	0.888182
		0.1142	789	317	472	634	1106	0.573237	0.573237		0.1749	615.881	191.119	424.763	382.237	807	0.473652	0.888907
		0.1141	789	318	471	636	1107	0.574526	0.574526		0.1749	616.437	191.563	424.873	383.127	808	0.474166	0.888907
		0.1139	789	320	469	640	1109	0.577096	0.576058		0.1748	616.992	192.008	424.984	384.016	809	0.47468	0.889629
		0.113	790	320	470	640	1110	0.576577	0.576058		0.1748	617.547	192.453	425.094	384.906	810	0.475192	0.889629
		0.1129	791	320	471	640	1111	0.576058	0.576058		0.1746	618.102	192.898	425.204	385.796	811	0.475704	0.890167
		0.1125	791	321	470	642	1112	0.577338	0.577338		0.1744	618.657	193.343	425.314	386.686	812	0.476215	0.890525
		0.1123	791	322	469	644	1113	0.578616	0.578616		0.1742	619.211	193.789	425.423	387.577	813	0.476725	0.890882
		0.1122	791	324	467	648	1115	0.581166	0.579556		0.1741	619.766	194.234	425.531	388.469	814	0.477234	0.891238
		0.1119	794	325	469	650	1119	0.580876	0.579556		0.1739	620.32	194.68	425.64	389.36	815	0.477743	0.891593
		0.1118	794	326	468	652	1120	0.582143	0.579556		0.1736	620.874	195.126	425.748	390.252	816	0.47825	0.892123
		0.1117	795	326	469	652	1121	0.581624	0.579556		0.1736	621.428	195.572	425.856	391.144	817	0.478757	0.892123
		0.1115	796	326	470	652	1122	0.581105	0.579556		0.1734	621.981	196.019	425.963	392.037	818	0.479263	0.892651
		0.1114	797	326	471	652	1123	0.580588	0.579556		0.173	622.535	196.465	426.07	392.93	819	0.479768	0.893002
		0.1111	799	326	473	652	1125	0.579556	0.579556		0.1729	623.088	196.912	426.177	393.823	820	0.480272	0.893701
		0.111	800	327	473	654	1127	0.580302	0.580302		0.1729	623.641	197.359	426.283	394.717	821	0.480776	0.893701
		0.1109	801	328	473	656	1129	0.581045	0.580531		0.1729	624.194	197.806	426.389	395.611	822	0.481279	0.893701
		0.1107	802	328	474	656	1130	0.580531	0.580531		0.1724	624.747	198.253	426.494	396.506	823	0.481781	0.89457
		0.1106	802	330	472	660	1132	0.583039	0.583039		0.1724	625.3	198.7	426.6	397.4	824	0.482282	0.89457
		0.1103	802	332	470	664	1134	0.585538	0.58427		0.1723	625.852	199.148	426.705	398.295	825	0.482782	0.89526
		0.11	802	334	468	668	1136	0.588028	0.58427		0.1723	626.405	199.595	426.809	399.191	826	0.483282	0.89526
		0.1097	803	334	469	668	1137	0.587511	0.58427		0.172	626.957	200.043	426.913	400.087	827	0.483781	0.895775
		0.1096	804	334	470	668	1138	0.586995	0.58427		0.1714	627.509	200.491	427.017	400.983	828	0.484279	0.896118
		0.1094	805	334	471	668	1139	0.586479	0.58427		0.1712	628.06	200.94	427.121	401.879	829	0.484776	0.896459
		0.1092	805	335	470	670	1140	0.587719	0.58427		0.1711	628.612	201.388	427.224	402.776	830	0.485272	0.89697
		0.1085	805	336	469	672	1141	0.588957	0.58427		0.1711	629.163	201.837	427.327	403.673	831	0.485768	0.89697
		0.1084	806	336	470	672	1142	0.588441	0.58427		0.1705	629.715	202.285	427.429	404.571	832	0.486263	0.897478
		0.1082	807	336	471	672	1143	0.587927	0.58427		0.1703	630.266	202.734	427.532	405.468	833	0.486757	0.897816
		0.108	807	337	470	674	1144	0.589161	0.58427		0.1701	630.817	203.183	427.633	406.367	834	0.48725	0.898153
		0.1079	807	338	469	676	1145	0.590393	0.58427		0.1699	631.367	203.633	427.735	407.265	835	0.487743	0.898656
		0.1077	808	338	470	676	1146	0.589878	0.58427		0.1699	631.918	204.082	427.836	408.164	836	0.488234	0.898656
		0.1076	810	338	472	676	1148	0.58885	0.58427		0.1696	632.468	204.532	427.937	409.063	837	0.488725	0.899158
		0.1075	812	338	474	676	1150	0.587826	0.58427		0.1695	633.019	204.981	428.037	409.963	838	0.489215	0.899491
		0.1073	814	338	476	676	1152	0.586806	0.58427		0.1693	633.569	205.431	428.138	410.862	839	0.489705	0.899823
		0.1071	816	338	478	676	1154	0.585789	0.58427		0.1691	634.119	205.881	428.237	411.763	840	0.490193	0.900155
		0.1068	817	338	479	676	1155	0.585281	0.58427		0.169	634.668	206.332	428.337	412.663	841	0.490681	0.900485
		0.1067	818	338	480	676	1156	0.584775	0.58427		0.1687	635.218	206.782	428.436	413.564	842	0.491168	0.900979
		0.1065	819	338	481	676	1157	0.58427	0.58427		0.1687	635.768	207.232	428.535	414.465	843	0.491655	0.900979
		0.1062	820	339	481	678	1159	0.584987	0.584987		0.1685	636.317	207.683	428.634	415.366	844	0.49214	0.901635
		0.1061	820	340	480	680	1160	0.586207	0.585198		0.1685	636.866	208.134	428.732	416.268	845	0.492625	0.901635
		0.1059	821	340	481	680	1161	0.585702	0.585198		0.1684	637.415	208.585	428.83	417.17	846	0.493109	0.902125
		0.1057	822	340	482	680	1162	0.585198	0.585198		0.1675	637.964	209.036	428.927	418.073	847	0.493592	0.90245
		0.1056	823	342	481	684	1165	0.587124	0.587124		0.1674	638.512	209.488	429.024	418.976	848	0.494075	0.902774
		0.1055	823	343	480	686	1166	0.588336	0.588336		0.1669	639.061	209.939	429.121	419.879	849	0.494557	0.903259
		0.1054	823	344	479	688	1167	0.589546	0.589546		0.1669	639.609	210.391	429.218	420.782	850	0.495038	0.903259
		0.105	823	345	478	690	1168	0.590753	0.590753		0.1668	640.157	210.843	429.314	421.686	851	0.495518	0.903903
		0.1049	824	347	477	694	1171	0.592656	0.591645		0.1668	640.705	211.295	429.41	422.59	852	0.495998	0.903903
		0.1048	826	347	479	694	1173	0.591645	0.591645		0.1665	641.253	211.747	429.506	423.494	853	0.496476	0.904543
		0.1045	826	348	478	696	1174	0.592845	0.592217		0.1665	641.801	212.199	429.601	424.399	854	0.496954	0.904543
		0.1044	826	349	477	698	1175	0.594043	0.592217		0.1662	642.348	212.652	429.696	425.304	855	0.497432	0.905338
		0.104	827	350	477	700	1177	0.594732	0.592217		0.1662	642.895	213.105	429.791	426.209	856	0.497908	0.905338
		0.1037	829	350	479	700	1179	0.593723	0.592217		0.1662	643.442	213.558	429.885	427.115	857	0.498384	0.905338
		0.1036	831	350	481	700	1181	0.592718	0.592217		0.166	643.99	214.01	429.979	428.021	858	0.498859	0.906128
		0.1034	832	350	482	700	1182	0.592217	0.592217		0.166	644.536	214.464	430.073	428.927	859	0.499333	0.906128
		0.1032	833	353	480	706	1186	0.595278	0.594777		0.1658	645.083	214.917	430.166	429.834	860	0.499807	0.906756
		0.103	834	353	481	706	1187	0.594777	0.594777		0.1658	645.63	215.37	430.259	430.741	861	0.50028	0.906756
		0.1029	834	354	480	708	1188	0.59596	0.595674		0.1657	646.176	215.824	430.352	431.648	862	0.500752	0.907225
		0.1028	834	355	479	710	1189	0.59714	0.595674		0.1655	646.722	216.278	430.444	432.556	863	0.501223	0.907537
		0.1027	835	356	479	712	1191	0.597817	0.595674		0.1652	647.268	216.732	430.537	433.463	864	0.501694	0.907848
		0.1025	836	356	480	712	1192	0.597315	0.595674		0.1648	647.814	217.186	430.628	434.372	865	0.502164	0.908158
		0.1024	837	356	481	712	1193	0.596815	0.595674		0.1647	648.36	217.64	430.72	435.28	866	0.502633	0.908467
		0.1023	837	357	480	714	1194	0.59799	0.595674		0.1641	648.906	218.094	430.811	436.189	867	0.503101	0.908775
		0.102	838	357	481	714	1195	0.59749	0.595674		0.1639	649.451	218.549	430.902	437.098	868	0.503569	0.909083
		0.1019	839	358	481	716	1197	0.598162	0.595674		0.1638	649.996	219.004	430.993	438.007	869	0.504036	0.909389
		0.1018	841	358	483	716	1199	0.597164	0.595674		0.1637	650.542	219.458	431.083	438.917	870	0.504502	0.909848
		0.1017	842	358	484	716	1200	0.596667	0.595674		0.1637	651.087	219.913	431.173	439.827	871	0.504968	0.909848
		0.1014	843	358	485	716	1201	0.59617	0.595674		0.1633	651.631	220.369	431.263	440.737	872	0.505433	0.910305
		0.1013	844	358	486	716	1202	0.595674	0.595674		0.1631	652.176	220.824	431.352	441.648	873	0.505897	0.910608
		0.101	844	360	484	720	1204	0.598007	0.598007		0.1626	652.721	221.279	431.441	442.559	874	0.50636	0.910911
		0.1006	845	361	484	722	1206	0.598673	0.598673		0.1624	653.265	221.735	431.53	443.47	875	0.506823	0.911363
		0.1003	845	362	483	724	1207	0.599834	0.599338		0.1624	653.809	222.191	431.619	444.381	876	0.507285	0.911363
		0.1002	846	362	484	724	1208	0.599338	0.599338		0.162	654.353	222.647	431.707	445.293	877	0.507746	0.911964
		0.1001	846	363	483	726	1209	0.600496	0.600165		0.162	654.897	223.103	431.795	446.205	878	0.508207	0.911964
		0.09995	846	364	482	728	1210	0.601653	0.600165		0.1619	655.441	223.559	431.882	447.118	879	0.508666	0.912561
		0.09994	847	364	483	728	1211	0.601156	0.600165		0.1619	655.985	224.015	431.969	448.031	880	0.509126	0.912561
		0.09929	848	364	484	728	1212	0.60066	0.600165		0.1618	656.528	224.472	432.056	448.944	881	0.509584	0.913156
		0.09922	849	364	485	728	1213	0.600165	0.600165		0.1618	657.072	224.928	432.143	449.857	882	0.510042	0.913156
		0.09886	849	365	484	730	1214	0.601318	0.601318		0.1615	657.615	225.385	432.23	450.77	883	0.510499	0.913599
		0.09879	849	366	483	732	1215	0.602469	0.601479		0.1614	658.158	225.842	432.316	451.684	884	0.510955	0.914041
		0.09864	850	366	484	732	1216	0.601974	0.601479		0.1614	658.701	226.299	432.401	452.599	885	0.511411	0.914041
		0.09842	851	366	485	732	1217	0.601479	0.601479		0.1608	659.243	226.757	432.487	453.513	886	0.511866	0.914482
		0.09841	851	367	484	734	1218	0.602627	0.602627		0.1601	659.786	227.214	432.572	454.428	887	0.51232	0.914774
		0.09829	851	368	483	736	1219	0.603774	0.603279		0.1599	660.329	227.671	432.657	455.343	888	0.512773	0.915066
		0.09812	852	368	484	736	1220	0.603279	0.603279		0.1597	660.871	228.129	432.742	456.258	889	0.513226	0.915357
		0.09805	852	369	483	738	1221	0.604423	0.604423		0.1595	661.413	228.587	432.826	457.174	890	0.513678	0.915647
		0.0979	852	370	482	740	1222	0.605565	0.60507		0.1593	661.955	229.045	432.91	458.09	891	0.51413	0.916081
		0.09768	853	370	483	740	1223	0.60507	0.60507		0.1593	662.497	229.503	432.994	459.006	892	0.514581	0.916081
		0.09764	853	371	482	742	1224	0.606209	0.605714		0.1592	663.039	229.961	433.077	459.923	893	0.515031	0.916514
		0.09752	854	371	483	742	1225	0.605714	0.605714		0.1588	663.58	230.42	433.161	460.839	894	0.51548	0.916801
		0.09748	854	372	482	744	1226	0.606852	0.606852		0.1586	664.122	230.878	433.244	461.756	895	0.515929	0.917088
		0.09746	854	373	481	746	1227	0.607987	0.607492		0.1578	664.663	231.337	433.326	462.674	896	0.516377	0.917373
		0.09714	855	373	482	746	1228	0.607492	0.607492		0.1577	665.204	231.796	433.409	463.591	897	0.516824	0.917943
		0.09705	855	374	481	748	1229	0.608625	0.608025		0.1577	665.745	232.255	433.491	464.509	898	0.517271	0.917943
		0.09658	856	374	482	748	1230	0.60813	0.608025		0.1577	666.286	232.714	433.572	465.428	899	0.517717	0.917943
		0.09648	856	375	481	750	1231	0.609261	0.608025		0.1575	666.827	233.173	433.654	466.346	900	0.518162	0.918509
		0.09642	857	375	482	750	1232	0.608766	0.608025		0.1571	667.368	233.632	433.735	467.265	901	0.518607	0.918791
		0.09635	858	375	483	750	1233	0.608273	0.608025		0.1569	667.908	234.092	433.816	468.184	902	0.519051	0.919073
		0.09634	858	376	482	752	1234	0.6094	0.608025		0.1565	668.448	234.552	433.897	469.103	903	0.519494	0.919494
		0.0962	859	376	483	752	1235	0.608907	0.608025		0.1565	668.989	235.011	433.977	470.023	904	0.519937	0.919494
		0.09619	859	377	482	754	1236	0.610032	0.608025		0.1562	669.529	235.471	434.057	470.943	905	0.520379	0.919913
		0.09615	860	377	483	754	1237	0.609539	0.608025		0.1559	670.068	235.932	434.137	471.863	906	0.52082	0.920191
		0.09601	860	378	482	756	1238	0.610662	0.608025		0.1558	670.608	236.392	434.216	472.784	907	0.521261	0.920469
		0.09591	861	378	483	756	1239	0.610169	0.608025		0.1555	671.148	236.852	434.296	473.704	908	0.521701	0.920746
		0.09589	862	378	484	756	1240	0.609677	0.608025		0.1552	671.687	237.313	434.375	474.625	909	0.52214	0.921023
		0.09577	863	379	484	758	1242	0.610306	0.608025		0.1549	672.227	237.773	434.453	475.547	910	0.522579	0.921298
		0.09571	865	379	486	758	1244	0.609325	0.608025		0.1548	672.766	238.234	434.532	476.468	911	0.523017	0.921573
		0.0954	866	379	487	758	1245	0.608835	0.608025		0.1547	673.305	238.695	434.61	477.39	912	0.523454	0.921848
		0.09539	867	379	488	758	1246	0.608347	0.608025		0.1546	673.844	239.156	434.688	478.312	913	0.523891	0.922121
		0.09533	867	380	487	760	1247	0.609463	0.608025		0.1543	674.383	239.617	434.765	479.235	914	0.524327	0.922394
		0.09529	868	380	488	760	1248	0.608974	0.608025		0.154	674.921	240.079	434.843	480.157	915	0.524762	0.922666
		0.09524	869	380	489	760	1249	0.608487	0.608025		0.1538	675.46	240.54	434.92	481.08	916	0.525197	0.923073
		0.09518	870	381	489	762	1251	0.609113	0.608025		0.1538	675.998	241.002	434.997	482.003	917	0.525631	0.923073
		0.09504	870	382	488	764	1252	0.610224	0.608025		0.1537	676.537	241.463	435.073	482.927	918	0.526064	0.923479
		0.095	871	383	488	766	1254	0.610845	0.608025		0.1535	677.075	241.925	435.149	483.851	919	0.526497	0.923883
		0.09479	872	383	489	766	1255	0.610359	0.608025		0.1535	677.613	242.387	435.225	484.775	920	0.526929	0.923883
		0.0947	873	383	490	766	1256	0.609873	0.608025		0.1531	678.151	242.849	435.301	485.699	921	0.52736	0.924285
		0.09459	873	384	489	768	1257	0.610979	0.608025		0.1528	678.688	243.312	435.377	486.623	922	0.527791	0.924552
		0.09444	874	384	490	768	1258	0.610493	0.608025		0.1525	679.226	243.774	435.452	487.548	923	0.528221	0.924952
		0.09415	874	385	489	770	1259	0.611597	0.608025		0.1525	679.763	244.237	435.527	488.473	924	0.528651	0.924952
		0.09414	874	386	488	772	1260	0.612698	0.608025		0.1523	680.301	244.699	435.601	489.399	925	0.52908	0.925351
		0.09398	875	386	489	772	1261	0.612213	0.608025		0.1522	681.5	244.5	437	489	926	0.528078	1
		0.09386	876	386	490	772	1262	0.611727	0.608025		0.1519	682	245	437	490	927	0.528587	1
		0.09384	876	387	489	774	1263	0.612827	0.608025		0.1518	682.5	245.5	437	491	928	0.529095	1
		0.09381	877	387	490	774	1264	0.612342	0.608025		0.1516	683	246	437	492	929	0.529602	1
		0.09377	877	388	489	776	1265	0.613439	0.608025		0.1515	683.5	246.5	437	493	930	0.530108	1
		0.09369	877	390	487	780	1267	0.615627	0.608025		0.1513	684	247	437	494	931	0.530612	1
		0.09353	878	390	488	780	1268	0.615142	0.608025		0.1511	684.5	247.5	437	495	932	0.531116	1
		0.09344	878	391	487	782	1269	0.616233	0.608025		0.1509	685	248	437	496	933	0.531618	1
		0.09338	879	391	488	782	1270	0.615748	0.608025		0.1507	685.5	248.5	437	497	934	0.53212	1
		0.09335	880	391	489	782	1271	0.615264	0.608025		0.1504	686	249	437	498	935	0.53262	1
		0.09328	881	391	490	782	1272	0.61478	0.608025		0.1502	686.5	249.5	437	499	936	0.53312	1
		0.09323	882	391	491	782	1273	0.614297	0.608025		0.1502	687	250	437	500	937	0.533618	1
		0.09314	882	392	490	784	1274	0.615385	0.608025		0.1498	687.5	250.5	437	501	938	0.534115	1
		0.09308	884	392	492	784	1276	0.61442	0.608025		0.1497	688	251	437	502	939	0.534611	1
		0.09307	885	392	493	784	1277	0.613939	0.608025		0.1497	688.5	251.5	437	503	940	0.535106	1
		0.09292	886	392	494	784	1278	0.613459	0.608025		0.1495	689	252	437	504	941	0.5356	1
		0.09276	887	393	494	786	1280	0.614062	0.608025		0.1491	689.5	252.5	437	505	942	0.536093	1
		0.09272	888	393	495	786	1281	0.613583	0.608025		0.1486	690	253	437	506	943	0.536585	1
		0.09262	889	393	496	786	1282	0.613105	0.608025		0.1485	690.5	253.5	437	507	944	0.537076	1
		0.0925	891	393	498	786	1284	0.61215	0.608025		0.1484	691	254	437	508	945	0.537566	1
		0.09229	892	394	498	788	1286	0.612753	0.608025		0.1483	691.5	254.5	437	509	946	0.538055	1
		0.09222	893	394	499	788	1287	0.612277	0.608025		0.1482	692	255	437	510	947	0.538543	1
		0.09203	894	394	500	788	1288	0.611801	0.608025		0.1482	692.5	255.5	437	511	948	0.53903	1
		0.09197	895	394	501	788	1289	0.611327	0.608025		0.1481	693	256	437	512	949	0.539515	1
		0.09187	897	394	503	788	1291	0.61038	0.608025		0.1479	693.5	256.5	437	513	950	0.54	1
		0.09182	898	394	504	788	1292	0.609907	0.608025		0.1469	694	257	437	514	951	0.540484	1
		0.09166	899	394	505	788	1293	0.609435	0.608025		0.1469	694.5	257.5	437	515	952	0.540966	1
		0.09163	900	394	506	788	1294	0.608964	0.608025		0.1468	695	258	437	516	953	0.541448	1
		0.09134	901	394	507	788	1295	0.608494	0.608025		0.1464	695.5	258.5	437	517	954	0.541929	1
		0.09116	902	394	508	788	1296	0.608025	0.608025		0.1462	696	259	437	518	955	0.542408	1
		0.09101	902	396	506	792	1298	0.610169	0.609281		0.1462	696.5	259.5	437	519	956	0.542887	1
		0.09099	902	397	505	794	1299	0.611239	0.609281		0.1462	697	260	437	520	957	0.543365	1
		0.09085	902	398	504	796	1300	0.612308	0.609281		0.1462	697.5	260.5	437	521	958	0.543841	1
		0.09075	902	399	503	798	1301	0.613374	0.609281		0.1459	698	261	437	522	959	0.544317	1
		0.09053	903	399	504	798	1302	0.612903	0.609281		0.1455	698.5	261.5	437	523	960	0.544792	1
		0.09036	904	399	505	798	1303	0.612433	0.609281		0.1454	699	262	437	524	961	0.545265	1
		0.09023	905	399	506	798	1304	0.611963	0.609281		0.1453	699.5	262.5	437	525	962	0.545738	1
		0.09004	906	399	507	798	1305	0.611494	0.609281		0.1449	700	263	437	526	963	0.54621	1
		0.09003	907	399	508	798	1306	0.611026	0.609281		0.1444	700.5	263.5	437	527	964	0.54668	1
		0.08997	908	399	509	798	1307	0.610559	0.609281		0.1441	701	264	437	528	965	0.54715	1
		0.08969	909	399	510	798	1308	0.610092	0.609281		0.1441	701.5	264.5	437	529	966	0.547619	1
		0.08959	910	399	511	798	1309	0.609626	0.609281		0.144	702	265	437	530	967	0.548087	1
		0.08952	910	400	510	800	1310	0.610687	0.609281		0.1438	702.5	265.5	437	531	968	0.548554	1
		0.08896	910	401	509	802	1311	0.611747	0.609281		0.1431	703	266	437	532	969	0.54902	1
		0.0888	910	402	508	804	1312	0.612805	0.609281		0.143	703.5	266.5	437	533	970	0.549485	1
		0.08867	911	402	509	804	1313	0.612338	0.609281		0.1429	704	267	437	534	971	0.549949	1
		0.08846	912	402	510	804	1314	0.611872	0.609281		0.1428	704.5	267.5	437	535	972	0.550412	1
		0.08806	913	402	511	804	1315	0.611407	0.609281		0.1428	705	268	437	536	973	0.550874	1
		0.08798	913	403	510	806	1316	0.612462	0.609281		0.1426	705.5	268.5	437	537	974	0.551335	1
		0.08797	913	404	509	808	1317	0.613516	0.609281		0.1421	706	269	437	538	975	0.551795	1
		0.08796	914	404	510	808	1318	0.61305	0.609281		0.1417	706.5	269.5	437	539	976	0.552254	1
		0.08782	915	404	511	808	1319	0.612585	0.609281		0.1416	707	270	437	540	977	0.552712	1
		0.08781	921	404	517	808	1325	0.609811	0.609281		0.1414	707.5	270.5	437	541	978	0.55317	1
		0.08749	922	404	518	808	1326	0.609351	0.609281		0.1406	708	271	437	542	979	0.553626	1
		0.08736	922	405	517	810	1327	0.610399	0.609281		0.1403	708.5	271.5	437	543	980	0.554082	1
		0.08731	922	406	516	812	1328	0.611446	0.609281		0.1403	709	272	437	544	981	0.554536	1
		0.0871	923	406	517	812	1329	0.610986	0.609281		0.14	709.5	272.5	437	545	982	0.55499	1
		0.08705	924	406	518	812	1330	0.610526	0.609281		0.1397	710	273	437	546	983	0.555443	1
		0.087	925	406	519	812	1331	0.610068	0.609281		0.1394	710.5	273.5	437	547	984	0.555894	1
		0.08678	926	406	520	812	1332	0.60961	0.609281		0.1391	711	274	437	548	985	0.556345	1
		0.08642	926	407	519	814	1333	0.610653	0.609281		0.1389	711.5	274.5	437	549	986	0.556795	1
		0.08639	927	407	520	814	1334	0.610195	0.609281		0.1385	712	275	437	550	987	0.557244	1
		0.086	928	407	521	814	1335	0.609738	0.609281		0.1378	712.5	275.5	437	551	988	0.557692	1
		0.08564	929	407	522	814	1336	0.609281	0.609281		0.1375	713	276	437	552	989	0.55814	1
		0.08552	929	408	521	816	1337	0.610322	0.610322		0.1372	713.5	276.5	437	553	990	0.558586	1
		0.08551	929	409	520	818	1338	0.61136	0.61136		0.1368	714	277	437	554	991	0.559031	1
		0.0855	929	410	519	820	1339	0.612397	0.611484		0.1361	714.5	277.5	437	555	992	0.559476	1
		0.08546	931	410	521	820	1341	0.611484	0.611484		0.1359	715	278	437	556	993	0.559919	1
		0.08524	931	411	520	822	1342	0.612519	0.611607		0.1358	715.5	278.5	437	557	994	0.560362	1
		0.08509	932	411	521	822	1343	0.612063	0.611607		0.1357	716	279	437	558	995	0.560804	1
		0.08504	933	411	522	822	1344	0.611607	0.611607		0.1356	716.5	279.5	437	559	996	0.561245	1
		0.085	933	412	521	824	1345	0.612639	0.612639		0.1354	717	280	437	560	997	0.561685	1
		0.08486	933	413	520	826	1346	0.61367	0.61367		0.1349	717.5	280.5	437	561	998	0.562124	1
		0.08472	933	414	519	828	1347	0.614699	0.614243		0.1347	718	281	437	562	999	0.562563	1
		0.08463	934	414	520	828	1348	0.614243	0.614243		0.1346	718.5	281.5	437	563	1000	0.563	1
		0.08454	934	415	519	830	1349	0.615271	0.615271		0.1345	719	282	437	564	1001	0.563437	1
		0.08431	934	416	518	832	1350	0.616296	0.615724		0.1345	719.5	282.5	437	565	1002	0.563872	1
		0.08421	934	417	517	834	1351	0.617321	0.615724		0.1343	720	283	437	566	1003	0.564307	1
		0.08417	934	418	516	836	1352	0.618343	0.615724		0.1342	720.5	283.5	437	567	1004	0.564741	1
		0.08396	935	418	517	836	1353	0.617886	0.615724		0.1338	721	284	437	568	1005	0.565174	1
		0.08395	936	418	518	836	1354	0.61743	0.615724		0.1327	721.5	284.5	437	569	1006	0.565606	1
		0.08381	937	418	519	836	1355	0.616974	0.615724		0.1327	722	285	437	570	1007	0.566038	1
		0.08375	938	418	520	836	1356	0.616519	0.615724		0.1319	722.5	285.5	437	571	1008	0.566468	1
		0.08343	938	419	519	838	1357	0.617539	0.615724		0.1316	723	286	437	572	1009	0.566898	1
		0.08342	939	419	520	838	1358	0.617084	0.615724		0.1316	723.5	286.5	437	573	1010	0.567327	1
		0.08313	940	419	521	838	1359	0.61663	0.615724		0.1314	724	287	437	574	1011	0.567755	1
		0.08308	941	419	522	838	1360	0.616176	0.615724		0.1314	724.5	287.5	437	575	1012	0.568182	1
		0.08299	942	419	523	838	1361	0.615724	0.615724		0.1311	725	288	437	576	1013	0.568608	1
		0.08291	942	420	522	840	1362	0.61674	0.61674		0.1305	725.5	288.5	437	577	1014	0.569034	1
		0.08288	942	421	521	842	1363	0.617755	0.617755		0.1303	726	289	437	578	1015	0.569458	1
		0.08278	942	422	520	844	1364	0.618768	0.618768		0.1301	726.5	289.5	437	579	1016	0.569882	1
		0.08275	942	423	519	846	1365	0.61978	0.61943		0.1301	727	290	437	580	1017	0.570305	1
		0.0827	942	424	518	848	1366	0.620791	0.61943		0.1301	727.5	290.5	437	581	1018	0.570727	1
		0.08268	943	424	519	848	1367	0.620337	0.61943		0.1296	728	291	437	582	1019	0.571148	1
		0.08264	944	424	520	848	1368	0.619883	0.61943		0.129	728.5	291.5	437	583	1020	0.571569	1
		0.08251	945	424	521	848	1369	0.61943	0.61943		0.1286	729	292	437	584	1021	0.571988	1
		0.08248	945	425	520	850	1370	0.620438	0.619985		0.1285	729.5	292.5	437	585	1022	0.572407	1
		0.08245	946	425	521	850	1371	0.619985	0.619985		0.1282	730	293	437	586	1023	0.572825	1
		0.08238	946	426	520	852	1372	0.620991	0.620087		0.1281	730.5	293.5	437	587	1024	0.573242	1
		0.08236	947	426	521	852	1373	0.620539	0.620087		0.128	731	294	437	588	1025	0.573659	1
		0.08234	948	426	522	852	1374	0.620087	0.620087		0.1278	731.5	294.5	437	589	1026	0.574074	1
		0.0822	948	427	521	854	1375	0.621091	0.621091		0.1276	732	295	437	590	1027	0.574489	1
		0.08197	948	428	520	856	1376	0.622093	0.621289		0.1273	732.5	295.5	437	591	1028	0.574903	1
		0.08182	948	429	519	858	1377	0.623094	0.621289		0.1269	733	296	437	592	1029	0.575316	1
		0.08178	949	429	520	858	1378	0.622642	0.621289		0.1267	733.5	296.5	437	593	1030	0.575728	1
		0.08177	951	429	522	858	1380	0.621739	0.621289		0.1266	734	297	437	594	1031	0.57614	1
		0.08169	952	429	523	858	1381	0.621289	0.621289		0.1265	734.5	297.5	437	595	1032	0.57655	1
		0.0816	952	431	521	862	1383	0.623283	0.622832		0.1265	735	298	437	596	1033	0.57696	1
		0.08157	953	431	522	862	1384	0.622832	0.622832		0.1263	735.5	298.5	437	597	1034	0.577369	1
		0.08145	953	432	521	864	1385	0.623827	0.623377		0.1261	736	299	437	598	1035	0.577778	1
		0.08135	954	432	522	864	1386	0.623377	0.623377		0.126	736.5	299.5	437	599	1036	0.578185	1
		0.08128	954	433	521	866	1387	0.624369	0.62347		0.126	737	300	437	600	1037	0.578592	1
		0.08127	955	433	522	866	1388	0.623919	0.62347		0.1259	737.5	300.5	437	601	1038	0.578998	1
		0.08109	956	433	523	866	1389	0.62347	0.62347		0.1256	738	301	437	602	1039	0.579403	1
		0.08094	956	434	522	868	1390	0.62446	0.62446		0.1254	738.5	301.5	437	603	1040	0.579808	1
		0.08084	956	435	521	870	1391	0.625449	0.625449		0.1253	739	302	437	604	1041	0.580211	1
		0.08076	956	436	520	872	1392	0.626437	0.625532		0.1252	739.5	302.5	437	605	1042	0.580614	1
		0.08075	956	437	519	874	1393	0.627423	0.625532		0.1251	740	303	437	606	1043	0.581016	1
		0.08074	956	438	518	876	1394	0.628407	0.625532		0.1251	740.5	303.5	437	607	1044	0.581418	1
		0.08066	957	438	519	876	1395	0.627957	0.625532		0.1249	741	304	437	608	1045	0.581818	1
		0.08041	958	438	520	876	1396	0.627507	0.625532		0.1248	741.5	304.5	437	609	1046	0.582218	1
		0.08034	959	439	520	878	1398	0.62804	0.625532		0.124	742	305	437	610	1047	0.582617	1
		0.08033	960	439	521	878	1399	0.627591	0.625532		0.1239	742.5	305.5	437	611	1048	0.583015	1
		0.08026	961	439	522	878	1400	0.627143	0.625532		0.1237	743	306	437	612	1049	0.583413	1
		0.0802	962	439	523	878	1401	0.626695	0.625532		0.1236	743.5	306.5	437	613	1050	0.58381	1
		0.08018	962	440	522	880	1402	0.627675	0.625532		0.1235	744	307	437	614	1051	0.584206	1
		0.08016	962	441	521	882	1403	0.628653	0.625532		0.1228	744.5	307.5	437	615	1052	0.584601	1
		0.08012	963	441	522	882	1404	0.628205	0.625532		0.1228	745	308	437	616	1053	0.584995	1
		0.08009	964	441	523	882	1405	0.627758	0.625532		0.1227	745.5	308.5	437	617	1054	0.585389	1
		0.08005	965	441	524	882	1406	0.627312	0.625532		0.1227	746	309	437	618	1055	0.585782	1
		0.08004	966	441	525	882	1407	0.626866	0.625532		0.1226	746.5	309.5	437	619	1056	0.586174	1
		0.08001	967	441	526	882	1408	0.62642	0.625532		0.1219	747	310	437	620	1057	0.586566	1
		0.07999	968	441	527	882	1409	0.625976	0.625532		0.1217	747.5	310.5	437	621	1058	0.586957	1
		0.07997	969	441	528	882	1410	0.625532	0.625532		0.1216	748	311	437	622	1059	0.587347	1
		0.07992	969	442	527	884	1411	0.626506	0.626506		0.1215	748.5	311.5	437	623	1060	0.587736	1
		0.07991	969	443	526	886	1412	0.627479	0.626761		0.1215	749	312	437	624	1061	0.588124	1
		0.07989	970	443	527	886	1413	0.627035	0.626761		0.1214	749.5	312.5	437	625	1062	0.588512	1
		0.07978	970	444	526	888	1414	0.628006	0.626761		0.1214	750	313	437	626	1063	0.588899	1
		0.07973	971	444	527	888	1415	0.627562	0.626761		0.1214	750.5	313.5	437	627	1064	0.589286	1
		0.0797	971	445	526	890	1416	0.628531	0.626761		0.1211	751	314	437	628	1065	0.589671	1
		0.07969	972	445	527	890	1417	0.628088	0.626761		0.121	751.5	314.5	437	629	1066	0.590056	1
		0.07968	973	445	528	890	1418	0.627645	0.626761		0.1208	752	315	437	630	1067	0.59044	1
		0.07965	974	445	529	890	1419	0.627202	0.626761		0.1207	752.5	315.5	437	631	1068	0.590824	1
		0.07964	975	445	530	890	1420	0.626761	0.626761		0.1202	753	316	437	632	1069	0.591207	1
		0.07963	975	446	529	892	1421	0.627727	0.627286		0.1201	753.5	316.5	437	633	1070	0.591589	1
		0.07958	976	446	530	892	1422	0.627286	0.627286		0.1201	754	317	437	634	1071	0.59197	1
		0.07955	976	447	529	894	1423	0.62825	0.627667		0.1199	754.5	317.5	437	635	1072	0.592351	1
		0.07951	976	448	528	896	1424	0.629213	0.627667		0.1199	755	318	437	636	1073	0.592731	1
		0.07948	977	449	528	898	1426	0.629734	0.627667		0.1197	755.5	318.5	437	637	1074	0.59311	1
		0.07943	977	450	527	900	1427	0.630694	0.627667		0.1194	756	319	437	638	1075	0.593488	1
		0.07939	978	450	528	900	1428	0.630252	0.627667		0.1194	756.5	319.5	437	639	1076	0.593866	1
		0.07937	978	451	527	902	1429	0.631211	0.627667		0.1192	757	320	437	640	1077	0.594243	1
		0.07932	978	452	526	904	1430	0.632168	0.627667		0.1191	757.5	320.5	437	641	1078	0.59462	1
		0.07926	979	452	527	904	1431	0.631726	0.627667		0.1189	758	321	437	642	1079	0.594995	1
		0.07912	979	453	526	906	1432	0.632682	0.627667		0.1188	758.5	321.5	437	643	1080	0.59537	1
		0.0791	980	453	527	906	1433	0.63224	0.627667		0.1188	759	322	437	644	1081	0.595745	1
		0.07909	980	454	526	908	1434	0.633194	0.627667		0.1184	759.5	322.5	437	645	1082	0.596118	1
		0.07907	981	454	527	908	1435	0.632753	0.627667		0.1182	760	323	437	646	1083	0.596491	1
		0.07905	981	455	526	910	1436	0.633705	0.627667		0.1175	760.5	323.5	437	647	1084	0.596863	1
		0.07903	981	456	525	912	1437	0.634656	0.627667		0.1175	761	324	437	648	1085	0.597235	1
		0.07901	982	456	526	912	1438	0.634214	0.627667		0.1175	761.5	324.5	437	649	1086	0.597606	1
		0.07895	983	456	527	912	1439	0.633773	0.627667		0.1175	762	325	437	650	1087	0.597976	1
		0.07894	984	456	528	912	1440	0.633333	0.627667		0.1174	762.5	325.5	437	651	1088	0.598346	1
		0.07893	985	456	529	912	1441	0.632894	0.627667		0.1173	763	326	437	652	1089	0.598714	1
		0.07892	986	456	530	912	1442	0.632455	0.627667		0.1169	763.5	326.5	437	653	1090	0.599083	1
		0.07891	988	456	532	912	1444	0.631579	0.627667		0.1169	764	327	437	654	1091	0.59945	1
		0.07887	989	456	533	912	1445	0.631142	0.627667		0.1166	764.5	327.5	437	655	1092	0.599817	1
		0.07883	990	456	534	912	1446	0.630705	0.627667		0.1166	765	328	437	656	1093	0.600183	1
		0.07882	991	456	535	912	1447	0.63027	0.627667		0.1163	765.5	328.5	437	657	1094	0.600548	1
		0.0788	992	456	536	912	1448	0.629834	0.627667		0.1163	766	329	437	658	1095	0.600913	1
		0.07878	993	456	537	912	1449	0.6294	0.627667		0.1162	766.5	329.5	437	659	1096	0.601277	1
		0.07874	994	456	538	912	1450	0.628966	0.627667		0.1159	767	330	437	660	1097	0.601641	1
		0.0787	995	456	539	912	1451	0.628532	0.627667		0.1156	767.5	330.5	437	661	1098	0.602004	1
		0.07869	996	456	540	912	1452	0.628099	0.627667		0.1155	768	331	437	662	1099	0.602366	1
		0.07867	997	456	541	912	1453	0.627667	0.627667		0.1152	768.5	331.5	437	663	1100	0.602727	1
		0.07865	997	457	540	914	1454	0.628611	0.628611		0.1151	769	332	437	664	1101	0.603088	1
		0.0786	997	458	539	916	1455	0.629553	0.629198		0.1149	769.5	332.5	437	665	1102	0.603448	1
		0.07858	997	459	538	918	1456	0.630495	0.629198		0.1148	770	333	437	666	1103	0.603808	1
		0.07853	998	459	539	918	1457	0.630062	0.629198		0.1146	770.5	333.5	437	667	1104	0.604167	1
		0.07852	999	459	540	918	1458	0.62963	0.629198		0.1145	771	334	437	668	1105	0.604525	1
		0.07851	1000	459	541	918	1459	0.629198	0.629198		0.1142	771.5	334.5	437	669	1106	0.604882	1
		0.07845	1000	460	540	920	1460	0.630137	0.629275		0.1141	772	335	437	670	1107	0.605239	1
		0.07842	1001	460	541	920	1461	0.629706	0.629275		0.1139	772.5	335.5	437	671	1108	0.605596	1
		0.0784	1002	460	542	920	1462	0.629275	0.629275		0.1139	773	336	437	672	1109	0.605951	1
		0.07839	1002	461	541	922	1463	0.630212	0.629352		0.113	773.5	336.5	437	673	1110	0.606306	1
		0.07838	1003	461	542	922	1464	0.629781	0.629352		0.1129	774	337	437	674	1111	0.606661	1
		0.07837	1004	461	543	922	1465	0.629352	0.629352		0.1125	774.5	337.5	437	675	1112	0.607014	1
		0.07836	1004	462	542	924	1466	0.630286	0.630286		0.1123	775	338	437	676	1113	0.607367	1
		0.0783	1005	463	542	926	1468	0.63079	0.63079		0.1122	775.5	338.5	437	677	1114	0.60772	1
		0.07828	1005	464	541	928	1469	0.631722	0.631293		0.1122	776	339	437	678	1115	0.608072	1
		0.07826	1006	464	542	928	1470	0.631293	0.631293		0.1119	776.5	339.5	437	679	1116	0.608423	1
		0.07772	1006	465	541	930	1471	0.632223	0.631793		0.1119	777	340	437	680	1117	0.608774	1
		0.07761	1007	465	542	930	1472	0.631793	0.631793		0.1119	777.5	340.5	437	681	1118	0.609123	1
		0.0775	1007	466	541	932	1473	0.632722	0.632722		0.1119	778	341	437	682	1119	0.609473	1
		0.07705	1007	467	540	934	1474	0.63365	0.63322		0.1118	778.5	341.5	437	683	1120	0.609821	1
		0.07691	1008	467	541	934	1475	0.63322	0.63322		0.1117	779	342	437	684	1121	0.610169	1
		0.07688	1008	468	540	936	1476	0.634146	0.633717		0.1115	779.5	342.5	437	685	1122	0.610517	1
		0.07683	1009	468	541	936	1477	0.633717	0.633717		0.1114	780	343	437	686	1123	0.610864	1
		0.07645	1009	469	540	938	1478	0.634641	0.634212		0.1111	780.5	343.5	437	687	1124	0.61121	1
		0.07637	1010	469	541	938	1479	0.634212	0.634212		0.1111	781	344	437	688	1125	0.611556	1
		0.0759	1010	470	540	940	1480	0.635135	0.634706		0.111	781.5	344.5	437	689	1126	0.611901	1
		0.0755	1011	470	541	940	1481	0.634706	0.634706		0.111	782	345	437	690	1127	0.612245	1
		0.07538	1011	471	540	942	1482	0.635628	0.635628		0.1109	782.5	345.5	437	691	1128	0.612589	1
		0.07531	1011	472	539	944	1483	0.636548	0.636548		0.1109	783	346	437	692	1129	0.612932	1
		0.07527	1011	473	538	946	1484	0.637466	0.637466		0.1107	783.5	346.5	437	693	1130	0.613274	1
		0.07517	1011	474	537	948	1485	0.638384	0.637584		0.1106	784	347	437	694	1131	0.613616	1
		0.07493	1011	475	536	950	1486	0.6393	0.637584		0.1106	784.5	347.5	437	695	1132	0.613958	1
		0.07479	1013	475	538	950	1488	0.638441	0.637584		0.1103	785	348	437	696	1133	0.614298	1
		0.07461	1014	475	539	950	1489	0.638012	0.637584		0.1103	785.5	348.5	437	697	1134	0.614638	1
		0.07405	1015	475	540	950	1490	0.637584	0.637584		0.11	786	349	437	698	1135	0.614978	1
		0.07399	1015	476	539	952	1491	0.638498	0.637642		0.11	786.5	349.5	437	699	1136	0.615317	1
		0.07375	1016	476	540	952	1492	0.63807	0.637642		0.1097	787	350	437	700	1137	0.615655	1
		0.07372	1017	476	541	952	1493	0.637642	0.637642		0.1096	787.5	350.5	437	701	1138	0.615993	1
		0.07317	1018	477	541	954	1495	0.638127	0.638127		0.1094	788	351	437	702	1139	0.61633	1
		0.07298	1018	478	540	956	1496	0.639037	0.639037		0.1092	788.5	351.5	437	703	1140	0.616667	1
		0.07294	1018	479	539	958	1497	0.639947	0.639257		0.1085	789	352	437	704	1141	0.617003	1
		0.07274	1019	479	540	958	1498	0.639519	0.639257		0.1084	789.5	352.5	437	705	1142	0.617338	1
		0.07255	1019	480	539	960	1499	0.640427	0.639257		0.1082	790	353	437	706	1143	0.617673	1
		0.07251	1020	480	540	960	1500	0.64	0.639257		0.108	790.5	353.5	437	707	1144	0.618007	1
		0.07229	1020	481	539	962	1501	0.640906	0.639257		0.1079	791	354	437	708	1145	0.618341	1
		0.07214	1020	482	538	964	1502	0.641811	0.639257		0.1077	791.5	354.5	437	709	1146	0.618674	1
		0.07178	1021	482	539	964	1503	0.641384	0.639257		0.1076	792	355	437	710	1147	0.619006	1
		0.07177	1022	482	540	964	1504	0.640957	0.639257		0.1076	792.5	355.5	437	711	1148	0.619338	1
		0.07153	1023	482	541	964	1505	0.640532	0.639257		0.1075	793	356	437	712	1149	0.619669	1
		0.07148	1024	482	542	964	1506	0.640106	0.639257		0.1075	793.5	356.5	437	713	1150	0.62	1
		0.07142	1025	482	543	964	1507	0.639681	0.639257		0.1073	794	357	437	714	1151	0.62033	1
		0.07102	1026	482	544	964	1508	0.639257	0.639257		0.1073	794.5	357.5	437	715	1152	0.62066	1
		0.07062	1026	483	543	966	1509	0.640159	0.639312		0.1071	795	358	437	716	1153	0.620989	1
		0.07056	1027	483	544	966	1510	0.639735	0.639312		0.1071	795.5	358.5	437	717	1154	0.621317	1
		0.07043	1028	483	545	966	1511	0.639312	0.639312		0.1068	796	359	437	718	1155	0.621645	1
		0.07042	1028	484	544	968	1512	0.640212	0.639366		0.1067	796.5	359.5	437	719	1156	0.621972	1
		0.0703	1029	484	545	968	1513	0.639788	0.639366		0.1065	797	360	437	720	1157	0.622299	1
		0.07018	1030	484	546	968	1514	0.639366	0.639366		0.1062	797.5	360.5	437	721	1158	0.622625	1
		0.06969	1030	485	545	970	1515	0.640264	0.640264		0.1062	798	361	437	722	1159	0.622951	1
		0.06944	1030	486	544	972	1516	0.641161	0.641161		0.1061	798.5	361.5	437	723	1160	0.623276	1
		0.06906	1030	487	543	974	1517	0.642057	0.642057		0.1059	799	362	437	724	1161	0.6236	1
		0.06901	1030	488	542	976	1518	0.642951	0.642951		0.1057	799.5	362.5	437	725	1162	0.623924	1
		0.06886	1030	490	540	980	1520	0.644737	0.644737		0.1056	800	363	437	726	1163	0.624248	1
		0.06881	1030	491	539	982	1521	0.645628	0.645628		0.1056	800.5	363.5	437	727	1164	0.62457	1
		0.0688	1030	492	538	984	1522	0.646518	0.646518		0.1056	801	364	437	728	1165	0.624893	1
		0.06849	1030	493	537	986	1523	0.647406	0.646792		0.1055	801.5	364.5	437	729	1166	0.625214	1
		0.06833	1030	494	536	988	1524	0.648294	0.646792		0.1054	802	365	437	730	1167	0.625536	1
		0.0681	1031	494	537	988	1525	0.647869	0.646792		0.105	802.5	365.5	437	731	1168	0.625856	1
		0.06795	1032	495	537	990	1527	0.64833	0.646792		0.1049	803	366	437	732	1169	0.626176	1
		0.0679	1032	496	536	992	1528	0.649215	0.646792		0.1049	803.5	366.5	437	733	1170	0.626496	1
		0.06787	1033	496	537	992	1529	0.64879	0.646792		0.1049	804	367	437	734	1171	0.626815	1
		0.06781	1034	496	538	992	1530	0.648366	0.646792		0.1048	804.5	367.5	437	735	1172	0.627133	1
		0.06712	1034	497	537	994	1531	0.649249	0.646792		0.1048	805	368	437	736	1173	0.627451	1
		0.06709	1034	498	536	996	1532	0.650131	0.646792		0.1045	805.5	368.5	437	737	1174	0.627768	1
		0.06686	1035	498	537	996	1533	0.649706	0.646792		0.1044	806	369	437	738	1175	0.628085	1
		0.06653	1036	498	538	996	1534	0.649283	0.646792		0.104	806.5	369.5	437	739	1176	0.628401	1
		0.06627	1037	498	539	996	1535	0.64886	0.646792		0.104	807	370	437	740	1177	0.628717	1
		0.06606	1038	498	540	996	1536	0.648438	0.646792		0.1037	807.5	370.5	437	741	1178	0.629032	1
		0.06511	1039	498	541	996	1537	0.648016	0.646792		0.1037	808	371	437	742	1179	0.629347	1
		0.06502	1039	499	540	998	1538	0.648895	0.646792		0.1036	808.5	371.5	437	743	1180	0.629661	1
		0.065	1043	499	544	998	1542	0.647211	0.646792		0.1036	809	372	437	744	1181	0.629975	1
		0.06497	1044	499	545	998	1543	0.646792	0.646792		0.1034	809.5	372.5	437	745	1182	0.630288	1
		0.06493	1044	500	544	1000	1544	0.647668	0.647668		0.1032	810	373	437	746	1183	0.6306	1
		0.06457	1044	501	543	1002	1545	0.648544	0.648124		0.1032	810.5	373.5	437	747	1184	0.630912	1
		0.06427	1045	501	544	1002	1546	0.648124	0.648124		0.1032	811	374	437	748	1185	0.631224	1
		0.06414	1045	502	543	1004	1547	0.648998	0.648998		0.1032	811.5	374.5	437	749	1186	0.631535	1
		0.06402	1045	503	542	1006	1548	0.649871	0.649871		0.103	812	375	437	750	1187	0.631845	1
		0.06387	1045	504	541	1008	1549	0.650742	0.650742		0.1029	812.5	375.5	437	751	1188	0.632155	1
		0.06384	1045	505	540	1010	1550	0.651613	0.651193		0.1028	813	376	437	752	1189	0.632464	1
		0.06373	1046	505	541	1010	1551	0.651193	0.651193		0.1027	813.5	376.5	437	753	1190	0.632773	1
		0.06359	1046	506	540	1012	1552	0.652062	0.652062		0.1027	814	377	437	754	1191	0.633081	1
		0.06351	1046	507	539	1014	1553	0.65293	0.65293		0.1025	814.5	377.5	437	755	1192	0.633389	1
		0.06323	1046	508	538	1016	1554	0.653797	0.653009		0.1024	815	378	437	756	1193	0.633697	1
		0.06313	1047	508	539	1016	1555	0.653376	0.653009		0.1023	815.5	378.5	437	757	1194	0.634003	1
		0.06308	1047	509	538	1018	1556	0.654242	0.653009		0.102	816	379	437	758	1195	0.63431	1
		0.06289	1048	509	539	1018	1557	0.653821	0.653009		0.1019	816.5	379.5	437	759	1196	0.634615	1
		0.06275	1048	510	538	1020	1558	0.654685	0.653009		0.1019	817	380	437	760	1197	0.634921	1
		0.06242	1049	510	539	1020	1559	0.654266	0.653009		0.1018	817.5	380.5	437	761	1198	0.635225	1
		0.06212	1050	510	540	1020	1560	0.653846	0.653009		0.1018	818	381	437	762	1199	0.63553	1
		0.06198	1051	510	541	1020	1561	0.653427	0.653009		0.1017	818.5	381.5	437	763	1200	0.635833	1
		0.0617	1052	510	542	1020	1562	0.653009	0.653009		0.1014	819	382	437	764	1201	0.636137	1
		0.06162	1052	511	541	1022	1563	0.653871	0.653139		0.1013	819.5	382.5	437	765	1202	0.636439	1
		0.06144	1052	512	540	1024	1564	0.654731	0.653139		0.101	820	383	437	766	1203	0.636741	1
		0.06137	1053	512	541	1024	1565	0.654313	0.653139		0.101	820.5	383.5	437	767	1204	0.637043	1
		0.0612	1053	513	540	1026	1566	0.655172	0.653139		0.1006	821	384	437	768	1205	0.637344	1
		0.06114	1053	514	539	1028	1567	0.656031	0.653139		0.1006	821.5	384.5	437	769	1206	0.637645	1
		0.0608	1054	514	540	1028	1568	0.655612	0.653139		0.1003	822	385	437	770	1207	0.637945	1
		0.06076	1055	514	541	1028	1569	0.655194	0.653139		0.1002	822.5	385.5	437	771	1208	0.638245	1
		0.06071	1056	514	542	1028	1570	0.654777	0.653139		0.1001	823	386	437	772	1209	0.638544	1
		0.05999	1057	514	543	1028	1571	0.65436	0.653139		0.09995	823.5	386.5	437	773	1210	0.638843	1
		0.05985	1057	515	542	1030	1572	0.655216	0.653139		0.09994	824	387	437	774	1211	0.639141	1
		0.05955	1058	515	543	1030	1573	0.6548	0.653139		0.09929	824.5	387.5	437	775	1212	0.639439	1
		0.05954	1059	515	544	1030	1574	0.654384	0.653139		0.09922	825	388	437	776	1213	0.639736	1
		0.05927	1060	515	545	1030	1575	0.653968	0.653139		0.09886	825.5	388.5	437	777	1214	0.640033	1
		0.05882	1061	515	546	1030	1576	0.653553	0.653139		0.09879	826	389	437	778	1215	0.640329	1
		0.05878	1062	515	547	1030	1577	0.653139	0.653139		0.09864	826.5	389.5	437	779	1216	0.640625	1
		0.05871	1062	516	546	1032	1578	0.653992	0.653992		0.09842	827	390	437	780	1217	0.64092	1
		0.05817	1062	517	545	1034	1579	0.654845	0.654016		0.09841	827.5	390.5	437	781	1218	0.641215	1
		0.05785	1063	517	546	1034	1580	0.65443	0.654016		0.09829	828	391	437	782	1219	0.641509	1
		0.05773	1064	517	547	1034	1581	0.654016	0.654016		0.09812	828.5	391.5	437	783	1220	0.641803	1
		0.05706	1064	518	546	1036	1582	0.654867	0.654867		0.09805	829	392	437	784	1221	0.642097	1
		0.05703	1064	519	545	1038	1583	0.655717	0.655717		0.0979	829.5	392.5	437	785	1222	0.64239	1
		0.05683	1064	520	544	1040	1584	0.656566	0.656566		0.09768	830	393	437	786	1223	0.642682	1
		0.05668	1064	521	543	1042	1585	0.657413	0.656999		0.09764	830.5	393.5	437	787	1224	0.642974	1
		0.05652	1065	521	544	1042	1586	0.656999	0.656999		0.09752	831	394	437	788	1225	0.643265	1
		0.05557	1065	522	543	1044	1587	0.657845	0.657035		0.09748	831.5	394.5	437	789	1226	0.643556	1
		0.0555	1065	523	542	1046	1588	0.65869	0.657035		0.09746	832	395	437	790	1227	0.643847	1
		0.05537	1066	523	543	1046	1589	0.658276	0.657035		0.09714	832.5	395.5	437	791	1228	0.644137	1
		0.05527	1067	523	544	1046	1590	0.657862	0.657035		0.09705	833	396	437	792	1229	0.644426	1
		0.05513	1068	523	545	1046	1591	0.657448	0.657035		0.09658	833.5	396.5	437	793	1230	0.644715	1
		0.05451	1069	523	546	1046	1592	0.657035	0.657035		0.09648	834	397	437	794	1231	0.645004	1
		0.05439	1069	524	545	1048	1593	0.657878	0.657568		0.09642	834.5	397.5	437	795	1232	0.645292	1
		0.05412	1069	525	544	1050	1594	0.65872	0.657568		0.09635	835	398	437	796	1233	0.64558	1
		0.05376	1069	526	543	1052	1595	0.659561	0.657568		0.09634	835.5	398.5	437	797	1234	0.645867	1
		0.05311	1069	527	542	1054	1596	0.660401	0.657568		0.0962	836	399	437	798	1235	0.646154	1
		0.05299	1070	527	543	1054	1597	0.659987	0.657568		0.09619	836.5	399.5	437	799	1236	0.64644	1
		0.05298	1070	528	542	1056	1598	0.660826	0.657568		0.09615	837	400	437	800	1237	0.646726	1
		0.05252	1071	528	543	1056	1599	0.660413	0.657568		0.09601	837.5	400.5	437	801	1238	0.647011	1
		0.05242	1072	528	544	1056	1600	0.66	0.657568		0.09591	838	401	437	802	1239	0.647296	1
		0.05213	1073	529	544	1058	1602	0.660424	0.657568		0.09589	838.5	401.5	437	803	1240	0.647581	1
		0.05194	1073	530	543	1060	1603	0.66126	0.657568		0.09577	839	402	437	804	1241	0.647865	1
		0.05132	1074	530	544	1060	1604	0.660848	0.657568		0.09577	839.5	402.5	437	805	1242	0.648148	1
		0.05131	1075	530	545	1060	1605	0.660436	0.657568		0.09571	840	403	437	806	1243	0.648431	1
		0.0513	1076	530	546	1060	1606	0.660025	0.657568		0.09571	840.5	403.5	437	807	1244	0.648714	1
		0.05109	1077	530	547	1060	1607	0.659614	0.657568		0.0954	841	404	437	808	1245	0.648996	1
		0.05108	1078	530	548	1060	1608	0.659204	0.657568		0.09539	841.5	404.5	437	809	1246	0.649278	1
		0.05105	1079	530	549	1060	1609	0.658794	0.657568		0.09533	842	405	437	810	1247	0.649559	1
		0.05095	1080	530	550	1060	1610	0.658385	0.657568		0.09529	842.5	405.5	437	811	1248	0.64984	1
		0.05086	1082	530	552	1060	1612	0.657568	0.657568		0.09524	843	406	437	812	1249	0.65012	1
		0.05062	1082	531	551	1062	1613	0.6584	0.657619		0.09518	843.5	406.5	437	813	1250	0.6504	1
		0.05058	1083	531	552	1062	1614	0.657993	0.657619		0.09518	844	407	437	814	1251	0.650679	1
		0.05037	1083	532	551	1064	1615	0.658824	0.657619		0.09504	844.5	407.5	437	815	1252	0.650958	1
		0.04993	1084	532	552	1064	1616	0.658416	0.657619		0.095	845	408	437	816	1253	0.651237	1
		0.04954	1085	532	553	1064	1617	0.658009	0.657619		0.095	845.5	408.5	437	817	1254	0.651515	1
		0.04886	1085	533	552	1066	1618	0.658838	0.657619		0.09479	846	409	437	818	1255	0.651793	1
		0.04866	1086	533	553	1066	1619	0.658431	0.657619		0.0947	846.5	409.5	437	819	1256	0.65207	1
		0.04857	1087	533	554	1066	1620	0.658025	0.657619		0.09459	847	410	437	820	1257	0.652347	1
		0.04843	1088	533	555	1066	1621	0.657619	0.657619		0.09444	847.5	410.5	437	821	1258	0.652623	1
		0.04831	1088	534	554	1068	1622	0.658446	0.658446		0.09415	848	411	437	822	1259	0.652899	1
		0.04827	1088	535	553	1070	1623	0.659273	0.659273		0.09414	848.5	411.5	437	823	1260	0.653175	1
		0.04797	1088	536	552	1072	1624	0.660099	0.660099		0.09398	849	412	437	824	1261	0.65345	1
		0.04765	1088	537	551	1074	1625	0.660923	0.660517		0.09386	849.5	412.5	437	825	1262	0.653724	1
		0.04719	1089	537	552	1074	1626	0.660517	0.660517		0.09384	850	413	437	826	1263	0.653998	1
		0.047	1089	538	551	1076	1627	0.66134	0.66134		0.09381	850.5	413.5	437	827	1264	0.654272	1
		0.04694	1089	539	550	1078	1628	0.662162	0.661359		0.09377	851	414	437	828	1265	0.654545	1
		0.04669	1090	539	551	1078	1629	0.661756	0.661359		0.09369	851.5	414.5	437	829	1266	0.654818	1
		0.04643	1090	540	550	1080	1630	0.662577	0.661359		0.09369	852	415	437	830	1267	0.655091	1
		0.04638	1091	540	551	1080	1631	0.66217	0.661359		0.09353	852.5	415.5	437	831	1268	0.655363	1
		0.04626	1092	540	552	1080	1632	0.661765	0.661359		0.09344	853	416	437	832	1269	0.655634	1
		0.04596	1093	540	553	1080	1633	0.661359	0.661359		0.09338	853.5	416.5	437	833	1270	0.655906	1
		0.04569	1093	541	552	1082	1634	0.662179	0.661774		0.09335	854	417	437	834	1271	0.656176	1
		0.04562	1094	541	553	1082	1635	0.661774	0.661774		0.09328	854.5	417.5	437	835	1272	0.656447	1
		0.04541	1094	542	552	1084	1636	0.662592	0.662592		0.09323	855	418	437	836	1273	0.656716	1
		0.04532	1094	543	551	1086	1637	0.663409	0.662599		0.09314	855.5	418.5	437	837	1274	0.656986	1
		0.04525	1095	543	552	1086	1638	0.663004	0.662599		0.09308	856	419	437	838	1275	0.657255	1
		0.04481	1096	543	553	1086	1639	0.662599	0.662599		0.09308	856.5	419.5	437	839	1276	0.657524	1
		0.04474	1096	544	552	1088	1640	0.663415	0.663415		0.09307	857	420	437	840	1277	0.657792	1
		0.04458	1096	545	551	1090	1641	0.664229	0.664229		0.09292	857.5	420.5	437	841	1278	0.658059	1
		0.04453	1096	546	550	1092	1642	0.665043	0.665043		0.09276	858	421	437	842	1279	0.658327	1
		0.0442	1096	547	549	1094	1643	0.665855	0.665855		0.09276	858.5	421.5	437	843	1280	0.658594	1
		0.0441	1096	548	548	1096	1644	0.666667	0.666667		0.09272	859	422	437	844	1281	0.65886	1
		0.04401	1096	549	547	1098	1645	0.667477	0.66707		0.09262	859.5	422.5	437	845	1282	0.659126	1
		0.04394	1097	549	548	1098	1646	0.667072	0.66707		0.0925	860	423	437	846	1283	0.659392	1
		0.0439	1097	550	547	1100	1647	0.667881	0.66707		0.0925	860.5	423.5	437	847	1284	0.659657	1
		0.04367	1097	551	546	1102	1648	0.668689	0.66707		0.09229	861	424	437	848	1285	0.659922	1
		0.04348	1098	551	547	1102	1649	0.668284	0.66707		0.09229	861.5	424.5	437	849	1286	0.660187	1
		0.04307	1099	551	548	1102	1650	0.667879	0.66707		0.09222	862	425	437	850	1287	0.660451	1
		0.04293	1100	551	549	1102	1651	0.667474	0.66707		0.09203	862.5	425.5	437	851	1288	0.660714	1
		0.04272	1101	551	550	1102	1652	0.66707	0.66707		0.09197	863	426	437	852	1289	0.660978	1
		0.04242	1101	552	549	1104	1653	0.667877	0.667473		0.09187	863.5	426.5	437	853	1290	0.66124	1
		0.04239	1102	552	550	1104	1654	0.667473	0.667473		0.09187	864	427	437	854	1291	0.661503	1
		0.04222	1102	553	549	1106	1655	0.668278	0.668278		0.09182	864.5	427.5	437	855	1292	0.661765	1
		0.04198	1102	554	548	1108	1656	0.669082	0.669082		0.09166	865	428	437	856	1293	0.662026	1
		0.04195	1102	555	547	1110	1657	0.669885	0.669481		0.09163	865.5	428.5	437	857	1294	0.662287	1
		0.04187	1103	555	548	1110	1658	0.669481	0.669481		0.09134	866	429	437	858	1295	0.662548	1
		0.04162	1103	556	547	1112	1659	0.670283	0.669862		0.09116	866.5	429.5	437	859	1296	0.662809	1
		0.04106	1104	556	548	1112	1660	0.66988	0.669862		0.09101	867	430	437	860	1297	0.663069	1
		0.0408	1104	557	547	1114	1661	0.67068	0.669862		0.09101	867.5	430.5	437	861	1298	0.663328	1
		0.04079	1105	557	548	1114	1662	0.670277	0.669862		0.09099	868	431	437	862	1299	0.663587	1
		0.04059	1106	557	549	1114	1663	0.669874	0.669862		0.09085	868.5	431.5	437	863	1300	0.663846	1
		0.04029	1106	558	548	1116	1664	0.670673	0.669862		0.09075	869	432	437	864	1301	0.664105	1
		0.04008	1106	559	547	1118	1665	0.671471	0.669862		0.09053	869.5	432.5	437	865	1302	0.664363	1
		0.04005	1107	559	548	1118	1666	0.671068	0.669862		0.09036	870	433	437	866	1303	0.66462	1
		0.03976	1108	559	549	1118	1667	0.670666	0.669862		0.09023	870.5	433.5	437	867	1304	0.664877	1
		0.03963	1109	559	550	1118	1668	0.670264	0.669862		0.09004	871	434	437	868	1305	0.665134	1
		0.03957	1110	559	551	1118	1669	0.669862	0.669862		0.09003	871.5	434.5	437	869	1306	0.665391	1
		0.03944	1110	560	550	1120	1670	0.670659	0.670659		0.08997	872	435	437	870	1307	0.665647	1
		0.0391	1110	561	549	1122	1671	0.671454	0.671037		0.08969	872.5	435.5	437	871	1308	0.665902	1
		0.03895	1111	561	550	1122	1672	0.671053	0.671037		0.08959	873	436	437	872	1309	0.666157	1
		0.03865	1111	562	549	1124	1673	0.671847	0.671037		0.08952	873.5	436.5	437	873	1310	0.666412	1
		0.03821	1112	562	550	1124	1674	0.671446	0.671037		0.08896	874	437	437	874	1311	0.666667	1
		0.03807	1113	562	551	1124	1675	0.671045	0.671037		0.0888	874.5	437.5	437	875	1312	0.666921	1
		0.03792	1114	563	551	1126	1677	0.671437	0.671037		0.08867	875	438	437	876	1313	0.667174	1
		0.03778	1115	563	552	1126	1678	0.671037	0.671037		0.08846	875.5	438.5	437	877	1314	0.667428	1
		0.03758	1115	564	551	1128	1679	0.671828	0.671429		0.08806	876	439	437	878	1315	0.667681	1
		0.0374	1116	564	552	1128	1680	0.671429	0.671429		0.08798	876.5	439.5	437	879	1316	0.667933	1
		0.03736	1116	565	551	1130	1681	0.672219	0.672219		0.08797	877	440	437	880	1317	0.668185	1
		0.0372	1116	566	550	1132	1682	0.673008	0.673008		0.08796	877.5	440.5	437	881	1318	0.668437	1
		0.03696	1116	567	549	1134	1683	0.673797	0.673385		0.08782	878	441	437	882	1319	0.668688	1
		0.03689	1116	568	548	1136	1684	0.674584	0.673385		0.08781	878.5	441.5	437	883	1320	0.668939	1
		0.03688	1117	568	549	1136	1685	0.674184	0.673385		0.08781	879	442	437	884	1321	0.66919	1
		0.03678	1118	568	550	1136	1686	0.673784	0.673385		0.08781	879.5	442.5	437	885	1322	0.66944	1
		0.03676	1119	568	551	1136	1687	0.673385	0.673385		0.08781	880	443	437	886	1323	0.66969	1
		0.0367	1119	569	550	1138	1688	0.674171	0.674171		0.08781	880.5	443.5	437	887	1324	0.66994	1
		0.03662	1119	571	548	1142	1690	0.67574	0.67574		0.08781	881	444	437	888	1325	0.670189	1
		0.03657	1119	572	547	1144	1691	0.676523	0.676523		0.08749	881.5	444.5	437	889	1326	0.670437	1
		0.03655	1119	573	546	1146	1692	0.677305	0.677305		0.08736	882	445	437	890	1327	0.670686	1
		0.03625	1119	574	545	1148	1693	0.678086	0.678066		0.08731	882.5	445.5	437	891	1328	0.670934	1
		0.03611	1119	575	544	1150	1694	0.678867	0.678066		0.0871	883	446	437	892	1329	0.671181	1
		0.03598	1120	575	545	1150	1695	0.678466	0.678066		0.08705	883.5	446.5	437	893	1330	0.671429	1
		0.03581	1121	575	546	1150	1696	0.678066	0.678066		0.087	884	447	437	894	1331	0.671675	1
		0.0356	1121	576	545	1152	1697	0.678845	0.678424		0.08678	884.5	447.5	437	895	1332	0.671922	1
		0.03544	1122	576	546	1152	1698	0.678445	0.678424		0.08642	885	448	437	896	1333	0.672168	1
		0.03526	1123	577	546	1154	1700	0.678824	0.678424		0.08639	885.5	448.5	437	897	1334	0.672414	1
		0.03521	1124	577	547	1154	1701	0.678424	0.678424		0.086	886	449	437	898	1335	0.672659	1
		0.03517	1124	578	546	1156	1702	0.679201	0.679201		0.08564	886.5	449.5	437	899	1336	0.672904	1
		0.03513	1124	579	545	1158	1703	0.679977	0.679577		0.08552	887	450	437	900	1337	0.673149	1
		0.03479	1125	579	546	1158	1704	0.679577	0.679577		0.08551	887.5	450.5	437	901	1338	0.673393	1
		0.03474	1125	580	545	1160	1705	0.680352	0.679953		0.0855	888	451	437	902	1339	0.673637	1
		0.03431	1126	580	546	1160	1706	0.679953	0.679953		0.08546	888.5	451.5	437	903	1340	0.673881	1
		0.03399	1126	581	545	1162	1707	0.680726	0.680304		0.08546	889	452	437	904	1341	0.674124	1
		0.03359	1127	581	546	1162	1708	0.680328	0.680304		0.08524	889.5	452.5	437	905	1342	0.674367	1
		0.03344	1127	582	545	1164	1709	0.6811	0.680304		0.08509	890	453	437	906	1343	0.674609	1
		0.0331	1128	582	546	1164	1710	0.680702	0.680304		0.08504	890.5	453.5	437	907	1344	0.674851	1
		0.03307	1129	582	547	1164	1711	0.680304	0.680304		0.085	891	454	437	908	1345	0.675093	1
		0.03279	1129	583	546	1166	1712	0.681075	0.681075		0.08486	891.5	454.5	437	909	1346	0.675334	1
		0.03261	1129	584	545	1168	1713	0.681845	0.681447		0.08472	892	455	437	910	1347	0.675575	1
		0.03229	1130	584	546	1168	1714	0.681447	0.681447		0.08463	892.5	455.5	437	911	1348	0.675816	1
		0.03185	1130	585	545	1170	1715	0.682216	0.681818		0.08454	893	456	437	912	1349	0.676056	1
		0.03171	1131	585	546	1170	1716	0.681818	0.681818		0.08431	893.5	456.5	437	913	1350	0.676296	1
		0.03161	1131	586	545	1172	1717	0.682586	0.682586		0.08421	894	457	437	914	1351	0.676536	1
		0.0316	1131	587	544	1174	1718	0.683353	0.683353		0.08417	894.5	457.5	437	915	1352	0.676775	1
		0.03138	1132	588	544	1176	1720	0.683721	0.683691		0.08396	895	458	437	916	1353	0.677014	1
		0.03132	1132	589	543	1178	1721	0.684486	0.683691		0.08395	895.5	458.5	437	917	1354	0.677253	1
		0.03105	1133	589	544	1178	1722	0.684088	0.683691		0.08381	896	459	437	918	1355	0.677491	1
		0.03104	1134	589	545	1178	1723	0.683691	0.683691		0.08375	896.5	459.5	437	919	1356	0.677729	1
		0.031	1134	590	544	1180	1724	0.684455	0.684424		0.08343	897	460	437	920	1357	0.677966	1
		0.0308	1134	591	543	1182	1725	0.685217	0.684424		0.08342	897.5	460.5	437	921	1358	0.678203	1
		0.03057	1135	591	544	1182	1726	0.68482	0.684424		0.08313	898	461	437	922	1359	0.67844	1
		0.0305	1136	591	545	1182	1727	0.684424	0.684424		0.08308	898.5	461.5	437	923	1360	0.678676	1
		0.03042	1136	592	544	1184	1728	0.685185	0.685185		0.08299	899	462	437	924	1361	0.678913	1
		0.03041	1136	593	543	1186	1729	0.685946	0.685516		0.08291	899.5	462.5	437	925	1362	0.679148	1
		0.03025	1137	593	544	1186	1730	0.685549	0.685516		0.08288	900	463	437	926	1363	0.679384	1
		0.03023	1137	594	543	1188	1731	0.686308	0.685516		0.08278	900.5	463.5	437	927	1364	0.679619	1
		0.02997	1138	594	544	1188	1732	0.685912	0.685516		0.08275	901	464	437	928	1365	0.679853	1
		0.02996	1139	594	545	1188	1733	0.685516	0.685516		0.0827	901.5	464.5	437	929	1366	0.680088	1
		0.02994	1139	595	544	1190	1734	0.686275	0.686275		0.08268	902	465	437	930	1367	0.680322	1
		0.02973	1139	596	543	1192	1735	0.687032	0.686636		0.08264	902.5	465.5	437	931	1368	0.680556	1
		0.0297	1140	596	544	1192	1736	0.686636	0.686636		0.08251	903	466	437	932	1369	0.680789	1
		0.02954	1140	597	543	1194	1737	0.687392	0.687392		0.08248	903.5	466.5	437	933	1370	0.681022	1
		0.02945	1140	598	542	1196	1738	0.688147	0.687752		0.08245	904	467	437	934	1371	0.681255	1
		0.02939	1141	598	543	1196	1739	0.687752	0.687752		0.08238	904.5	467.5	437	935	1372	0.681487	1
		0.02919	1141	599	542	1198	1740	0.688506	0.688506		0.08236	905	468	437	936	1373	0.681719	1
		0.02907	1141	600	541	1200	1741	0.689259	0.689259		0.08234	905.5	468.5	437	937	1374	0.681951	1
		0.02869	1141	601	540	1202	1742	0.690011	0.689971		0.0822	906	469	437	938	1375	0.682182	1
		0.02845	1141	602	539	1204	1743	0.690763	0.689971		0.08197	906.5	469.5	437	939	1376	0.682413	1
		0.02822	1142	602	540	1204	1744	0.690367	0.689971		0.08182	907	470	437	940	1377	0.682643	1
		0.0282	1143	602	541	1204	1745	0.689971	0.689971		0.08178	907.5	470.5	437	941	1378	0.682874	1
		0.02797	1143	603	540	1206	1746	0.690722	0.690286		0.08177	908	471	437	942	1379	0.683104	1
		0.02761	1143	604	539	1208	1747	0.691471	0.690286		0.08177	908.5	471.5	437	943	1380	0.683333	1
		0.02755	1144	604	540	1208	1748	0.691076	0.690286		0.08169	909	472	437	944	1381	0.683563	1
		0.0275	1145	604	541	1208	1749	0.69068	0.690286		0.0816	909.5	472.5	437	945	1382	0.683792	1
		0.02747	1146	604	542	1208	1750	0.690286	0.690286		0.0816	910	473	437	946	1383	0.68402	1
		0.02736	1146	605	541	1210	1751	0.691034	0.691034		0.08157	910.5	473.5	437	947	1384	0.684249	1
		0.02712	1146	606	540	1212	1752	0.691781	0.691781		0.08145	911	474	437	948	1385	0.684477	1
		0.02703	1146	607	539	1214	1753	0.692527	0.692527		0.08135	911.5	474.5	437	949	1386	0.684704	1
		0.02696	1146	608	538	1216	1754	0.693273	0.693273		0.08128	912	475	437	950	1387	0.684932	1
		0.02646	1146	609	537	1218	1755	0.694017	0.693809		0.08127	912.5	475.5	437	951	1388	0.685159	1
		0.02644	1146	610	536	1220	1756	0.694761	0.693809		0.08109	913	476	437	952	1389	0.685385	1
		0.02641	1147	610	537	1220	1757	0.694365	0.693809		0.08094	913.5	476.5	437	953	1390	0.685612	1
		0.02636	1147	611	536	1222	1758	0.695108	0.693809		0.08084	914	477	437	954	1391	0.685838	1
		0.02618	1148	611	537	1222	1759	0.694713	0.693809		0.08076	914.5	477.5	437	955	1392	0.686063	1
		0.02613	1148	612	536	1224	1760	0.695455	0.693809		0.08075	915	478	437	956	1393	0.686289	1
		0.02595	1149	612	537	1224	1761	0.69506	0.693809		0.08074	915.5	478.5	437	957	1394	0.686514	1
		0.02591	1149	613	536	1226	1762	0.6958	0.693809		0.08066	916	479	437	958	1395	0.686738	1
		0.02576	1150	613	537	1226	1763	0.695406	0.693809		0.08041	916.5	479.5	437	959	1396	0.686963	1
		0.0257	1150	614	536	1228	1764	0.696145	0.693809		0.08034	917	480	437	960	1397	0.687187	1
		0.02567	1150	615	535	1230	1765	0.696884	0.693809		0.08034	917.5	480.5	437	961	1398	0.687411	1
		0.02537	1152	615	537	1230	1767	0.696095	0.693809		0.08033	918	481	437	962	1399	0.687634	1
		0.02517	1152	616	536	1232	1768	0.696833	0.693809		0.08026	918.5	481.5	437	963	1400	0.687857	1
		0.02505	1153	616	537	1232	1769	0.696439	0.693809		0.0802	919	482	437	964	1401	0.68808	1
		0.02484	1154	616	538	1232	1770	0.696045	0.693809		0.08018	919.5	482.5	437	965	1402	0.688302	1
		0.0247	1155	616	539	1232	1771	0.695652	0.693809		0.08016	920	483	437	966	1403	0.688525	1
		0.02442	1156	616	540	1232	1772	0.69526	0.693809		0.08012	920.5	483.5	437	967	1404	0.688746	1
		0.02421	1156	617	539	1234	1773	0.695995	0.693809		0.08009	921	484	437	968	1405	0.688968	1
		0.02407	1156	618	538	1236	1774	0.696731	0.693809		0.08005	921.5	484.5	437	969	1406	0.689189	1
		0.02401	1157	618	539	1236	1775	0.696338	0.693809		0.08004	922	485	437	970	1407	0.68941	1
		0.02359	1158	618	540	1236	1776	0.695946	0.693809		0.08001	922.5	485.5	437	971	1408	0.689631	1
		0.0234	1160	618	542	1236	1778	0.695163	0.693809		0.07999	923	486	437	972	1409	0.689851	1
		0.02319	1161	618	543	1236	1779	0.694772	0.693809		0.07997	923.5	486.5	437	973	1410	0.690071	1
		0.02318	1163	618	545	1236	1781	0.693992	0.693809		0.07992	924	487	437	974	1411	0.690291	1
		0.02311	1163	619	544	1238	1782	0.694725	0.693809		0.07991	924.5	487.5	437	975	1412	0.69051	1
		0.02299	1163	620	543	1240	1783	0.695457	0.693809		0.07989	925	488	437	976	1413	0.690729	1
		0.0228	1164	620	544	1240	1784	0.695067	0.693809		0.07978	925.5	488.5	437	977	1414	0.690948	1
		0.0226	1165	620	545	1240	1785	0.694678	0.693809		0.07973	926	489	437	978	1415	0.691166	1
		0.02249	1166	620	546	1240	1786	0.694289	0.693809		0.0797	926.5	489.5	437	979	1416	0.691384	1
		0.02238	1167	620	547	1240	1787	0.6939	0.693809		0.07969	927	490	437	980	1417	0.691602	1
		0.02236	1167	621	546	1242	1788	0.694631	0.693809		0.07968	927.5	490.5	437	981	1418	0.691819	1
		0.0222	1167	622	545	1244	1789	0.695361	0.693809		0.07965	928	491	437	982	1419	0.692037	1
		0.02212	1168	622	546	1244	1790	0.694972	0.693809		0.07964	928.5	491.5	437	983	1420	0.692254	1
		0.0219	1169	622	547	1244	1791	0.694584	0.693809		0.07963	929	492	437	984	1421	0.69247	1
		0.02162	1170	622	548	1244	1792	0.694196	0.693809		0.07958	929.5	492.5	437	985	1422	0.692686	1
		0.02143	1171	622	549	1244	1793	0.693809	0.693809		0.07955	930	493	437	986	1423	0.692902	1
		0.02124	1171	623	548	1246	1794	0.694537	0.694105		0.07951	930.5	493.5	437	987	1424	0.693118	1
		0.02105	1172	623	549	1246	1795	0.69415	0.694105		0.07948	931	494	437	988	1425	0.693333	1
		0.02091	1172	624	548	1248	1796	0.694878	0.694105		0.07948	931.5	494.5	437	989	1426	0.693548	1
		0.02089	1173	624	549	1248	1797	0.694491	0.694105		0.07943	932	495	437	990	1427	0.693763	1
		0.02086	1174	624	550	1248	1798	0.694105	0.694105		0.07939	932.5	495.5	437	991	1428	0.693978	1
		0.02067	1174	625	549	1250	1799	0.69483	0.694444		0.07937	933	496	437	992	1429	0.694192	1
		0.02063	1175	625	550	1250	1800	0.694444	0.694444		0.07932	933.5	496.5	437	993	1430	0.694406	1
		0.02048	1175	626	549	1252	1801	0.695169	0.694551		0.07926	934	497	437	994	1431	0.694619	1
		0.02029	1176	626	550	1252	1802	0.694784	0.694551		0.07912	934.5	497.5	437	995	1432	0.694832	1
		0.02018	1176	627	549	1254	1803	0.695507	0.694551		0.0791	935	498	437	996	1433	0.695045	1
		0.02012	1176	628	548	1256	1804	0.696231	0.694551		0.07909	935.5	498.5	437	997	1434	0.695258	1
		0.02006	1177	628	549	1256	1805	0.695845	0.694551		0.07907	936	499	437	998	1435	0.69547	1
		0.01937	1177	629	548	1258	1806	0.696567	0.694551		0.07905	936.5	499.5	437	999	1436	0.695682	1
		0.01936	1178	629	549	1258	1807	0.696182	0.694551		0.07903	937	500	437	1000	1437	0.695894	1
		0.01933	1179	629	550	1258	1808	0.695796	0.694551		0.07901	937.5	500.5	437	1001	1438	0.696106	1
		0.019	1179	630	549	1260	1809	0.696517	0.694551		0.07895	938	501	437	1002	1439	0.696317	1
		0.01899	1179	631	548	1262	1810	0.697238	0.694551		0.07894	938.5	501.5	437	1003	1440	0.696528	1
		0.01894	1180	631	549	1262	1811	0.696853	0.694551		0.07893	939	502	437	1004	1441	0.696738	1
		0.0188	1181	631	550	1262	1812	0.696468	0.694551		0.07892	939.5	502.5	437	1005	1442	0.696949	1
		0.01864	1182	631	551	1262	1813	0.696084	0.694551		0.07891	940	503	437	1006	1443	0.697159	1
		0.01848	1183	631	552	1262	1814	0.6957	0.694551		0.07891	940.5	503.5	437	1007	1444	0.697368	1
		0.01832	1184	631	553	1262	1815	0.695317	0.694551		0.07887	941	504	437	1008	1445	0.697578	1
		0.01815	1185	631	554	1262	1816	0.694934	0.694551		0.07883	941.5	504.5	437	1009	1446	0.697787	1
		0.01809	1186	631	555	1262	1817	0.694551	0.694551		0.07882	942	505	437	1010	1447	0.697996	1
		0.01805	1186	632	554	1264	1818	0.69527	0.694887		0.0788	942.5	505.5	437	1011	1448	0.698204	1
		0.01791	1187	632	555	1264	1819	0.694887	0.694887		0.07878	943	506	437	1012	1449	0.698413	1
		0.01781	1187	633	554	1266	1820	0.695604	0.695604		0.07874	943.5	506.5	437	1013	1450	0.698621	1
		0.01768	1187	634	553	1268	1821	0.696321	0.696321		0.0787	944	507	437	1014	1451	0.698828	1
		0.01764	1187	636	551	1272	1823	0.697751	0.697751		0.07869	944.5	507.5	437	1015	1452	0.699036	1
		0.01752	1187	637	550	1274	1824	0.698465	0.697979		0.07867	945	508	437	1016	1453	0.699243	1
		0.01729	1187	639	548	1278	1826	0.69989	0.697979		0.07865	945.5	508.5	437	1017	1454	0.69945	1
		0.01716	1189	639	550	1278	1828	0.699125	0.697979		0.0786	946	509	437	1018	1455	0.699656	1
		0.01709	1190	639	551	1278	1829	0.698742	0.697979		0.07858	946.5	509.5	437	1019	1456	0.699863	1
		0.01701	1191	639	552	1278	1830	0.698361	0.697979		0.07853	947	510	437	1020	1457	0.700069	1
		0.01697	1192	639	553	1278	1831	0.697979	0.697979		0.07852	947.5	510.5	437	1021	1458	0.700274	1
		0.01684	1192	640	552	1280	1832	0.69869	0.698309		0.07851	948	511	437	1022	1459	0.70048	1
		0.01673	1193	640	553	1280	1833	0.698309	0.698309		0.07845	948.5	511.5	437	1023	1460	0.700685	1
		0.01668	1193	641	552	1282	1834	0.699019	0.699019		0.07842	949	512	437	1024	1461	0.70089	1
		0.01634	1193	642	551	1284	1835	0.699728	0.699728		0.0784	949.5	512.5	437	1025	1462	0.701094	1
		0.01619	1193	643	550	1286	1836	0.700436	0.699946		0.07839	950	513	437	1026	1463	0.701299	1
		0.01595	1193	644	549	1288	1837	0.701143	0.699946		0.07838	950.5	513.5	437	1027	1464	0.701503	1
		0.01588	1194	644	550	1288	1838	0.700762	0.699946		0.07837	951	514	437	1028	1465	0.701706	1
		0.01569	1195	644	551	1288	1839	0.700381	0.699946		0.07836	951.5	514.5	437	1029	1466	0.70191	1
		0.01493	1195	645	550	1290	1840	0.701087	0.699946		0.0783	952	515	437	1030	1467	0.702113	1
		0.01462	1197	645	552	1290	1842	0.700326	0.699946		0.0783	952.5	515.5	437	1031	1468	0.702316	1
		0.01416	1198	645	553	1290	1843	0.699946	0.699946		0.07828	953	516	437	1032	1469	0.702519	1
		0.01394	1198	646	552	1292	1844	0.700651	0.700651		0.07826	953.5	516.5	437	1033	1470	0.702721	1
		0.0139	1198	647	551	1294	1845	0.701355	0.701075		0.07772	954	517	437	1034	1471	0.702923	1
		0.01383	1198	648	550	1296	1846	0.702059	0.701075		0.07761	954.5	517.5	437	1035	1472	0.703125	1
		0.01362	1198	649	549	1298	1847	0.702761	0.701075		0.0775	955	518	437	1036	1473	0.703327	1
		0.01347	1198	650	548	1300	1848	0.703463	0.701075		0.07705	955.5	518.5	437	1037	1474	0.703528	1
		0.01316	1198	651	547	1302	1849	0.704164	0.701075		0.07691	956	519	437	1038	1475	0.703729	1
		0.01305	1199	651	548	1302	1850	0.703784	0.701075		0.07688	956.5	519.5	437	1039	1476	0.70393	1
		0.01257	1200	651	549	1302	1851	0.703404	0.701075		0.07683	957	520	437	1040	1477	0.70413	1
		0.01224	1201	651	550	1302	1852	0.703024	0.701075		0.07645	957.5	520.5	437	1041	1478	0.70433	1
		0.01222	1201	652	549	1304	1853	0.703724	0.701075		0.07637	958	521	437	1042	1479	0.70453	1
		0.009975	1202	652	550	1304	1854	0.703344	0.701075		0.0759	958.5	521.5	437	1043	1480	0.70473	1
		0.008586	1203	652	551	1304	1855	0.702965	0.701075		0.0755	959	522	437	1044	1481	0.704929	1
		0.006649	1205	652	553	1304	1857	0.702208	0.701075		0.07538	959.5	522.5	437	1045	1482	0.705128	1
		0.006007	1206	652	554	1304	1858	0.70183	0.701075		0.07531	960	523	437	1046	1483	0.705327	1
		0.003941	1207	652	555	1304	1859	0.701452	0.701075		0.07527	960.5	523.5	437	1047	1484	0.705526	1
		0.00341	1208	652	556	1304	1860	0.701075	0.701075		0.07517	961	524	437	1048	1485	0.705724	1
		0.000506	1208	653	555	1306	1861	0.701773	0.701773		0.07493	961.5	524.5	437	1049	1486	0.705922	1
											0.07479	962	525	437	1050	1487	0.70612	1
											0.07479	962.5	525.5	437	1051	1488	0.706317	1
											0.07461	963	526	437	1052	1489	0.706514	1
											0.07405	963.5	526.5	437	1053	1490	0.706711	1
											0.07399	964	527	437	1054	1491	0.706908	1
											0.07375	964.5	527.5	437	1055	1492	0.707105	1
											0.07372	965	528	437	1056	1493	0.707301	1
											0.07317	965.5	528.5	437	1057	1494	0.707497	1
											0.07317	966	529	437	1058	1495	0.707692	1
											0.07298	966.5	529.5	437	1059	1496	0.707888	1
											0.07294	967	530	437	1060	1497	0.708083	1
											0.07274	967.5	530.5	437	1061	1498	0.708278	1
											0.07255	968	531	437	1062	1499	0.708472	1
											0.07251	968.5	531.5	437	1063	1500	0.708667	1
											0.07229	969	532	437	1064	1501	0.708861	1
											0.07214	969.5	532.5	437	1065	1502	0.709055	1
											0.07178	970	533	437	1066	1503	0.709248	1
											0.07177	970.5	533.5	437	1067	1504	0.709441	1
											0.07153	971	534	437	1068	1505	0.709635	1
											0.07148	971.5	534.5	437	1069	1506	0.709827	1
											0.07142	972	535	437	1070	1507	0.71002	1
											0.07102	972.5	535.5	437	1071	1508	0.710212	1
											0.07062	973	536	437	1072	1509	0.710404	1
											0.07056	973.5	536.5	437	1073	1510	0.710596	1
											0.07043	974	537	437	1074	1511	0.710788	1
											0.07042	974.5	537.5	437	1075	1512	0.710979	1
											0.0703	975	538	437	1076	1513	0.71117	1
											0.07018	975.5	538.5	437	1077	1514	0.711361	1
											0.06969	976	539	437	1078	1515	0.711551	1
											0.06944	976.5	539.5	437	1079	1516	0.711741	1
											0.06906	977	540	437	1080	1517	0.711931	1
											0.06901	977.5	540.5	437	1081	1518	0.712121	1
											0.06886	978	541	437	1082	1519	0.712311	1
											0.06886	978.5	541.5	437	1083	1520	0.7125	1
											0.06881	979	542	437	1084	1521	0.712689	1
											0.0688	979.5	542.5	437	1085	1522	0.712878	1
											0.06849	980	543	437	1086	1523	0.713066	1
											0.06833	980.5	543.5	437	1087	1524	0.713255	1
											0.0681	981	544	437	1088	1525	0.713443	1
											0.06795	981.5	544.5	437	1089	1526	0.71363	1
											0.06795	982	545	437	1090	1527	0.713818	1
											0.0679	982.5	545.5	437	1091	1528	0.714005	1
											0.06787	983	546	437	1092	1529	0.714192	1
											0.06781	983.5	546.5	437	1093	1530	0.714379	1
											0.06712	984	547	437	1094	1531	0.714566	1
											0.06709	984.5	547.5	437	1095	1532	0.714752	1
											0.06686	985	548	437	1096	1533	0.714938	1
											0.06653	985.5	548.5	437	1097	1534	0.715124	1
											0.06627	986	549	437	1098	1535	0.715309	1
											0.06606	986.5	549.5	437	1099	1536	0.715495	1
											0.06511	987	550	437	1100	1537	0.71568	1
											0.06502	987.5	550.5	437	1101	1538	0.715865	1
											0.065	988	551	437	1102	1539	0.716049	1
											0.065	988.5	551.5	437	1103	1540	0.716234	1
											0.065	989	552	437	1104	1541	0.716418	1
											0.065	989.5	552.5	437	1105	1542	0.716602	1
											0.06497	990	553	437	1106	1543	0.716785	1
											0.06493	990.5	553.5	437	1107	1544	0.716969	1
											0.06457	991	554	437	1108	1545	0.717152	1
											0.06427	991.5	554.5	437	1109	1546	0.717335	1
											0.06414	992	555	437	1110	1547	0.717518	1
											0.06402	992.5	555.5	437	1111	1548	0.7177	1
											0.06387	993	556	437	1112	1549	0.717883	1
											0.06384	993.5	556.5	437	1113	1550	0.718065	1
											0.06373	994	557	437	1114	1551	0.718246	1
											0.06359	994.5	557.5	437	1115	1552	0.718428	1
											0.06351	995	558	437	1116	1553	0.718609	1
											0.06323	995.5	558.5	437	1117	1554	0.71879	1
											0.06313	996	559	437	1118	1555	0.718971	1
											0.06308	996.5	559.5	437	1119	1556	0.719152	1
											0.06289	997	560	437	1120	1557	0.719332	1
											0.06275	997.5	560.5	437	1121	1558	0.719512	1
											0.06242	998	561	437	1122	1559	0.719692	1
											0.06212	998.5	561.5	437	1123	1560	0.719872	1
											0.06198	999	562	437	1124	1561	0.720051	1
											0.0617	999.5	562.5	437	1125	1562	0.72023	1
											0.06162	1000	563	437	1126	1563	0.720409	1
											0.06144	1000.5	563.5	437	1127	1564	0.720588	1
											0.06137	1001	564	437	1128	1565	0.720767	1
											0.0612	1001.5	564.5	437	1129	1566	0.720945	1
											0.06114	1002	565	437	1130	1567	0.721123	1
											0.0608	1002.5	565.5	437	1131	1568	0.721301	1
											0.06076	1003	566	437	1132	1569	0.721479	1
											0.06071	1003.5	566.5	437	1133	1570	0.721656	1
											0.05999	1004	567	437	1134	1571	0.721833	1
											0.05985	1004.5	567.5	437	1135	1572	0.72201	1
											0.05955	1005	568	437	1136	1573	0.722187	1
											0.05954	1005.5	568.5	437	1137	1574	0.722363	1
											0.05927	1006	569	437	1138	1575	0.72254	1
											0.05882	1006.5	569.5	437	1139	1576	0.722716	1
											0.05878	1007	570	437	1140	1577	0.722892	1
											0.05871	1007.5	570.5	437	1141	1578	0.723067	1
											0.05817	1008	571	437	1142	1579	0.723243	1
											0.05785	1008.5	571.5	437	1143	1580	0.723418	1
											0.05773	1009	572	437	1144	1581	0.723593	1
											0.05706	1009.5	572.5	437	1145	1582	0.723767	1
											0.05703	1010	573	437	1146	1583	0.723942	1
											0.05683	1010.5	573.5	437	1147	1584	0.724116	1
											0.05668	1011	574	437	1148	1585	0.72429	1
											0.05652	1011.5	574.5	437	1149	1586	0.724464	1
											0.05557	1012	575	437	1150	1587	0.724638	1
											0.0555	1012.5	575.5	437	1151	1588	0.724811	1
											0.05537	1013	576	437	1152	1589	0.724984	1
											0.05527	1013.5	576.5	437	1153	1590	0.725157	1
											0.05513	1014	577	437	1154	1591	0.72533	1
											0.05451	1014.5	577.5	437	1155	1592	0.725503	1
											0.05439	1015	578	437	1156	1593	0.725675	1
											0.05412	1015.5	578.5	437	1157	1594	0.725847	1
											0.05376	1016	579	437	1158	1595	0.726019	1
											0.05311	1016.5	579.5	437	1159	1596	0.72619	1
											0.05299	1017	580	437	1160	1597	0.726362	1
											0.05298	1017.5	580.5	437	1161	1598	0.726533	1
											0.05252	1018	581	437	1162	1599	0.726704	1
											0.05242	1018.5	581.5	437	1163	1600	0.726875	1
											0.05213	1019	582	437	1164	1601	0.727046	1
											0.05213	1019.5	582.5	437	1165	1602	0.727216	1
											0.05194	1020	583	437	1166	1603	0.727386	1
											0.05132	1020.5	583.5	437	1167	1604	0.727556	1
											0.05131	1021	584	437	1168	1605	0.727726	1
											0.0513	1021.5	584.5	437	1169	1606	0.727895	1
											0.05109	1022	585	437	1170	1607	0.728065	1
											0.05108	1022.5	585.5	437	1171	1608	0.728234	1
											0.05105	1023	586	437	1172	1609	0.728403	1
											0.05095	1023.5	586.5	437	1173	1610	0.728571	1
											0.05086	1024	587	437	1174	1611	0.72874	1
											0.05086	1024.5	587.5	437	1175	1612	0.728908	1
											0.05062	1025	588	437	1176	1613	0.729076	1
											0.05058	1025.5	588.5	437	1177	1614	0.729244	1
											0.05037	1026	589	437	1178	1615	0.729412	1
											0.04993	1026.5	589.5	437	1179	1616	0.729579	1
											0.04954	1027	590	437	1180	1617	0.729746	1
											0.04886	1027.5	590.5	437	1181	1618	0.729913	1
											0.04866	1028	591	437	1182	1619	0.73008	1
											0.04857	1028.5	591.5	437	1183	1620	0.730247	1
											0.04843	1029	592	437	1184	1621	0.730413	1
											0.04831	1029.5	592.5	437	1185	1622	0.73058	1
											0.04827	1030	593	437	1186	1623	0.730746	1
											0.04797	1030.5	593.5	437	1187	1624	0.730911	1
											0.04765	1031	594	437	1188	1625	0.731077	1
											0.04719	1031.5	594.5	437	1189	1626	0.731242	1
											0.047	1032	595	437	1190	1627	0.731407	1
											0.04694	1032.5	595.5	437	1191	1628	0.731572	1
											0.04669	1033	596	437	1192	1629	0.731737	1
											0.04643	1033.5	596.5	437	1193	1630	0.731902	1
											0.04638	1034	597	437	1194	1631	0.732066	1
											0.04626	1034.5	597.5	437	1195	1632	0.73223	1
											0.04596	1035	598	437	1196	1633	0.732394	1
											0.04569	1035.5	598.5	437	1197	1634	0.732558	1
											0.04562	1036	599	437	1198	1635	0.732722	1
											0.04541	1036.5	599.5	437	1199	1636	0.732885	1
											0.04532	1037	600	437	1200	1637	0.733048	1
											0.04525	1037.5	600.5	437	1201	1638	0.733211	1
											0.04481	1038	601	437	1202	1639	0.733374	1
											0.04474	1038.5	601.5	437	1203	1640	0.733537	1
											0.04458	1039	602	437	1204	1641	0.733699	1
											0.04453	1039.5	602.5	437	1205	1642	0.733861	1
											0.0442	1040	603	437	1206	1643	0.734023	1
											0.0441	1040.5	603.5	437	1207	1644	0.734185	1
											0.04401	1041	604	437	1208	1645	0.734347	1
											0.04394	1041.5	604.5	437	1209	1646	0.734508	1
											0.0439	1042	605	437	1210	1647	0.734669	1
											0.04367	1042.5	605.5	437	1211	1648	0.73483	1
											0.04348	1043	606	437	1212	1649	0.734991	1
											0.04307	1043.5	606.5	437	1213	1650	0.735152	1
											0.04293	1044	607	437	1214	1651	0.735312	1
											0.04272	1044.5	607.5	437	1215	1652	0.735472	1
											0.04242	1045	608	437	1216	1653	0.735632	1
											0.04239	1045.5	608.5	437	1217	1654	0.735792	1
											0.04222	1046	609	437	1218	1655	0.735952	1
											0.04198	1046.5	609.5	437	1219	1656	0.736111	1
											0.04195	1047	610	437	1220	1657	0.73627	1
											0.04187	1047.5	610.5	437	1221	1658	0.736429	1
											0.04162	1048	611	437	1222	1659	0.736588	1
											0.04106	1048.5	611.5	437	1223	1660	0.736747	1
											0.0408	1049	612	437	1224	1661	0.736905	1
											0.04079	1049.5	612.5	437	1225	1662	0.737064	1
											0.04059	1050	613	437	1226	1663	0.737222	1
											0.04029	1050.5	613.5	437	1227	1664	0.73738	1
											0.04008	1051	614	437	1228	1665	0.737538	1
											0.04005	1051.5	614.5	437	1229	1666	0.737695	1
											0.03976	1052	615	437	1230	1667	0.737852	1
											0.03963	1052.5	615.5	437	1231	1668	0.73801	1
											0.03957	1053	616	437	1232	1669	0.738167	1
											0.03944	1053.5	616.5	437	1233	1670	0.738323	1
											0.0391	1054	617	437	1234	1671	0.73848	1
											0.03895	1054.5	617.5	437	1235	1672	0.738636	1
											0.03865	1055	618	437	1236	1673	0.738793	1
											0.03821	1055.5	618.5	437	1237	1674	0.738949	1
											0.03807	1056	619	437	1238	1675	0.739104	1
											0.03792	1056.5	619.5	437	1239	1676	0.73926	1
											0.03792	1057	620	437	1240	1677	0.739416	1
											0.03778	1057.5	620.5	437	1241	1678	0.739571	1
											0.03758	1058	621	437	1242	1679	0.739726	1
											0.0374	1058.5	621.5	437	1243	1680	0.739881	1
											0.03736	1059	622	437	1244	1681	0.740036	1
											0.0372	1059.5	622.5	437	1245	1682	0.74019	1
											0.03696	1060	623	437	1246	1683	0.740345	1
											0.03689	1060.5	623.5	437	1247	1684	0.740499	1
											0.03688	1061	624	437	1248	1685	0.740653	1
											0.03678	1061.5	624.5	437	1249	1686	0.740807	1
											0.03676	1062	625	437	1250	1687	0.74096	1
											0.0367	1062.5	625.5	437	1251	1688	0.741114	1
											0.03662	1063	626	437	1252	1689	0.741267	1
											0.03662	1063.5	626.5	437	1253	1690	0.74142	1
											0.03657	1064	627	437	1254	1691	0.741573	1
											0.03655	1064.5	627.5	437	1255	1692	0.741726	1
											0.03625	1065	628	437	1256	1693	0.741878	1
											0.03611	1065.5	628.5	437	1257	1694	0.742031	1
											0.03598	1066	629	437	1258	1695	0.742183	1
											0.03581	1066.5	629.5	437	1259	1696	0.742335	1
											0.0356	1067	630	437	1260	1697	0.742487	1
											0.03544	1067.5	630.5	437	1261	1698	0.742638	1
											0.03526	1068	631	437	1262	1699	0.74279	1
											0.03526	1068.5	631.5	437	1263	1700	0.742941	1
											0.03521	1069	632	437	1264	1701	0.743092	1
											0.03517	1069.5	632.5	437	1265	1702	0.743243	1
											0.03513	1070	633	437	1266	1703	0.743394	1
											0.03479	1070.5	633.5	437	1267	1704	0.743545	1
											0.03474	1071	634	437	1268	1705	0.743695	1
											0.03431	1071.5	634.5	437	1269	1706	0.743845	1
											0.03399	1072	635	437	1270	1707	0.743995	1
											0.03359	1072.5	635.5	437	1271	1708	0.744145	1
											0.03344	1073	636	437	1272	1709	0.744295	1
											0.0331	1073.5	636.5	437	1273	1710	0.744444	1
											0.03307	1074	637	437	1274	1711	0.744594	1
											0.03279	1074.5	637.5	437	1275	1712	0.744743	1
											0.03261	1075	638	437	1276	1713	0.744892	1
											0.03229	1075.5	638.5	437	1277	1714	0.745041	1
											0.03185	1076	639	437	1278	1715	0.74519	1
											0.03171	1076.5	639.5	437	1279	1716	0.745338	1
											0.03161	1077	640	437	1280	1717	0.745486	1
											0.0316	1077.5	640.5	437	1281	1718	0.745634	1
											0.03138	1078	641	437	1282	1719	0.745782	1
											0.03138	1078.5	641.5	437	1283	1720	0.74593	1
											0.03132	1079	642	437	1284	1721	0.746078	1
											0.03105	1079.5	642.5	437	1285	1722	0.746225	1
											0.03104	1080	643	437	1286	1723	0.746373	1
											0.031	1080.5	643.5	437	1287	1724	0.74652	1
											0.0308	1081	644	437	1288	1725	0.746667	1
											0.03057	1081.5	644.5	437	1289	1726	0.746813	1
											0.0305	1082	645	437	1290	1727	0.74696	1
											0.03042	1082.5	645.5	437	1291	1728	0.747106	1
											0.03041	1083	646	437	1292	1729	0.747253	1
											0.03025	1083.5	646.5	437	1293	1730	0.747399	1
											0.03023	1084	647	437	1294	1731	0.747545	1
											0.02997	1084.5	647.5	437	1295	1732	0.747691	1
											0.02996	1085	648	437	1296	1733	0.747836	1
											0.02994	1085.5	648.5	437	1297	1734	0.747982	1
											0.02973	1086	649	437	1298	1735	0.748127	1
											0.0297	1086.5	649.5	437	1299	1736	0.748272	1
											0.02954	1087	650	437	1300	1737	0.748417	1
											0.02945	1087.5	650.5	437	1301	1738	0.748562	1
											0.02939	1088	651	437	1302	1739	0.748706	1
											0.02919	1088.5	651.5	437	1303	1740	0.748851	1
											0.02907	1089	652	437	1304	1741	0.748995	1
											0.02869	1089.5	652.5	437	1305	1742	0.749139	1
											0.02845	1090	653	437	1306	1743	0.749283	1
											0.02822	1090.5	653.5	437	1307	1744	0.749427	1
											0.0282	1091	654	437	1308	1745	0.74957	1
											0.02797	1091.5	654.5	437	1309	1746	0.749714	1
											0.02761	1092	655	437	1310	1747	0.749857	1
											0.02755	1092.5	655.5	437	1311	1748	0.75	1
											0.0275	1093	656	437	1312	1749	0.750143	1
											0.02747	1093.5	656.5	437	1313	1750	0.750286	1
											0.02736	1094	657	437	1314	1751	0.750428	1
											0.02712	1094.5	657.5	437	1315	1752	0.750571	1
											0.02703	1095	658	437	1316	1753	0.750713	1
											0.02696	1095.5	658.5	437	1317	1754	0.750855	1
											0.02646	1096	659	437	1318	1755	0.750997	1
											0.02644	1096.5	659.5	437	1319	1756	0.751139	1
											0.02641	1097	660	437	1320	1757	0.751281	1
											0.02636	1097.5	660.5	437	1321	1758	0.751422	1
											0.02618	1098	661	437	1322	1759	0.751563	1
											0.02613	1098.5	661.5	437	1323	1760	0.751705	1
											0.02595	1099	662	437	1324	1761	0.751846	1
											0.02591	1099.5	662.5	437	1325	1762	0.751986	1
											0.02576	1100	663	437	1326	1763	0.752127	1
											0.0257	1100.5	663.5	437	1327	1764	0.752268	1
											0.02567	1101	664	437	1328	1765	0.752408	1
											0.02537	1101.5	664.5	437	1329	1766	0.752548	1
											0.02537	1102	665	437	1330	1767	0.752688	1
											0.02517	1102.5	665.5	437	1331	1768	0.752828	1
											0.02505	1103	666	437	1332	1769	0.752968	1
											0.02484	1103.5	666.5	437	1333	1770	0.753107	1
											0.0247	1104	667	437	1334	1771	0.753247	1
											0.02442	1104.5	667.5	437	1335	1772	0.753386	1
											0.02421	1105	668	437	1336	1773	0.753525	1
											0.02407	1105.5	668.5	437	1337	1774	0.753664	1
											0.02401	1106	669	437	1338	1775	0.753803	1
											0.02359	1106.5	669.5	437	1339	1776	0.753941	1
											0.0234	1107	670	437	1340	1777	0.75408	1
											0.0234	1107.5	670.5	437	1341	1778	0.754218	1
											0.02319	1108	671	437	1342	1779	0.754356	1
											0.02318	1108.5	671.5	437	1343	1780	0.754494	1
											0.02318	1109	672	437	1344	1781	0.754632	1
											0.02311	1109.5	672.5	437	1345	1782	0.75477	1
											0.02299	1110	673	437	1346	1783	0.754907	1
											0.0228	1110.5	673.5	437	1347	1784	0.755045	1
											0.0226	1111	674	437	1348	1785	0.755182	1
											0.02249	1111.5	674.5	437	1349	1786	0.755319	1
											0.02238	1112	675	437	1350	1787	0.755456	1
											0.02236	1112.5	675.5	437	1351	1788	0.755593	1
											0.0222	1113	676	437	1352	1789	0.755729	1
											0.02212	1113.5	676.5	437	1353	1790	0.755866	1
											0.0219	1114	677	437	1354	1791	0.756002	1
											0.02162	1114.5	677.5	437	1355	1792	0.756138	1
											0.02143	1115	678	437	1356	1793	0.756274	1
											0.02124	1115.5	678.5	437	1357	1794	0.75641	1
											0.02105	1116	679	437	1358	1795	0.756546	1
											0.02091	1116.5	679.5	437	1359	1796	0.756682	1
											0.02089	1117	680	437	1360	1797	0.756817	1
											0.02086	1117.5	680.5	437	1361	1798	0.756952	1
											0.02067	1118	681	437	1362	1799	0.757087	1
											0.02063	1118.5	681.5	437	1363	1800	0.757222	1
											0.02048	1119	682	437	1364	1801	0.757357	1
											0.02029	1119.5	682.5	437	1365	1802	0.757492	1
											0.02018	1120	683	437	1366	1803	0.757626	1
											0.02012	1120.5	683.5	437	1367	1804	0.757761	1
											0.02006	1121	684	437	1368	1805	0.757895	1
											0.01937	1121.5	684.5	437	1369	1806	0.758029	1
											0.01936	1122	685	437	1370	1807	0.758163	1
											0.01933	1122.5	685.5	437	1371	1808	0.758296	1
											0.019	1123	686	437	1372	1809	0.75843	1
											0.01899	1123.5	686.5	437	1373	1810	0.758564	1
											0.01894	1124	687	437	1374	1811	0.758697	1
											0.0188	1124.5	687.5	437	1375	1812	0.75883	1
											0.01864	1125	688	437	1376	1813	0.758963	1
											0.01848	1125.5	688.5	437	1377	1814	0.759096	1
											0.01832	1126	689	437	1378	1815	0.759229	1
											0.01815	1126.5	689.5	437	1379	1816	0.759361	1
											0.01809	1127	690	437	1380	1817	0.759494	1
											0.01805	1127.5	690.5	437	1381	1818	0.759626	1
											0.01791	1128	691	437	1382	1819	0.759758	1
											0.01781	1128.5	691.5	437	1383	1820	0.75989	1
											0.01768	1129	692	437	1384	1821	0.760022	1
											0.01764	1129.5	692.5	437	1385	1822	0.760154	1
											0.01764	1130	693	437	1386	1823	0.760285	1
											0.01752	1130.5	693.5	437	1387	1824	0.760417	1
											0.01729	1131	694	437	1388	1825	0.760548	1
											0.01729	1131.5	694.5	437	1389	1826	0.760679	1
											0.01716	1132	695	437	1390	1827	0.76081	1
											0.01716	1132.5	695.5	437	1391	1828	0.760941	1
											0.01709	1133	696	437	1392	1829	0.761072	1
											0.01701	1133.5	696.5	437	1393	1830	0.761202	1
											0.01697	1134	697	437	1394	1831	0.761333	1
											0.01684	1134.5	697.5	437	1395	1832	0.761463	1
											0.01673	1135	698	437	1396	1833	0.761593	1
											0.01668	1135.5	698.5	437	1397	1834	0.761723	1
											0.01634	1136	699	437	1398	1835	0.761853	1
											0.01619	1136.5	699.5	437	1399	1836	0.761983	1
											0.01595	1137	700	437	1400	1837	0.762112	1
											0.01588	1137.5	700.5	437	1401	1838	0.762242	1
											0.01569	1138	701	437	1402	1839	0.762371	1
											0.01493	1138.5	701.5	437	1403	1840	0.7625	1
											0.01462	1139	702	437	1404	1841	0.762629	1
											0.01462	1139.5	702.5	437	1405	1842	0.762758	1
											0.01416	1140	703	437	1406	1843	0.762887	1
											0.01394	1140.5	703.5	437	1407	1844	0.763015	1
											0.0139	1141	704	437	1408	1845	0.763144	1
											0.01383	1141.5	704.5	437	1409	1846	0.763272	1
											0.01362	1142	705	437	1410	1847	0.7634	1
											0.01347	1142.5	705.5	437	1411	1848	0.763528	1
											0.01316	1143	706	437	1412	1849	0.763656	1
											0.01305	1143.5	706.5	437	1413	1850	0.763784	1
											0.01257	1144	707	437	1414	1851	0.763911	1
											0.01224	1144.5	707.5	437	1415	1852	0.764039	1
											0.01222	1145	708	437	1416	1853	0.764166	1
											0.009975	1145.5	708.5	437	1417	1854	0.764293	1
											0.008586	1146	709	437	1418	1855	0.76442	1
											0.006649	1146.5	709.5	437	1419	1856	0.764547	1
											0.006649	1147	710	437	1420	1857	0.764674	1
											0.006007	1147.5	710.5	437	1421	1858	0.764801	1
											0.003941	1148	711	437	1422	1859	0.764927	1
											0.00341	1148.5	711.5	437	1423	1860	0.765054	1
											0.000506	1149	712	437	1424	1861	0.76518	1

## Sheet: Spectral Level Data
Spectral Level Data		Confidence Threshold	Forward	Reverse	Correct	Incorrect	Total	Global FDR	q-value		Fit Confidence Threshold	Fit Forward	Fit Reverse	Fit Correct	Fit Incorrect	Fit Total	Fit Global FDR	Fit Local FDR
		1	567	1	566	2	568	0.00352113	0.00172265		1	0.999891	0.000108604	0.999783	0.000217208	1	0.000217208	0.00115674
		0.9999	571	1	570	2	572	0.0034965	0.00172265		1	1.99978	0.000217209	1.99957	0.000434419	2	0.000217209	0.00115674
		0.9997	575	1	574	2	576	0.00347222	0.00172265		1	2.99967	0.000325816	2.99935	0.000651631	3	0.00021721	0.00115674
		0.9996	576	1	575	2	577	0.0034662	0.00172265		1	3.99957	0.000434423	3.99913	0.000868846	4	0.000217211	0.00115674
		0.9993	579	1	578	2	580	0.00344828	0.00172265		1	4.99946	0.000543031	4.99891	0.00108606	5	0.000217212	0.00115674
		0.9987	899	1	898	2	900	0.00222222	0.00172265		1	5.99935	0.00065164	5.9987	0.00130328	6	0.000217213	0.00115674
		0.9984	900	1	899	2	901	0.00221976	0.00172265		1	6.99924	0.000760251	6.99848	0.0015205	7	0.000217215	0.00115674
		0.9979	1141	1	1140	2	1142	0.00175131	0.00172265		1	7.99913	0.000868862	7.99826	0.00173772	8	0.000217216	0.00115674
		0.9978	1142	1	1141	2	1143	0.00174978	0.00172265		1	8.99902	0.000977475	8.99805	0.00195495	9	0.000217217	0.00115674
		0.9976	1143	1	1142	2	1144	0.00174825	0.00172265		1	9.99891	0.00108609	9.99783	0.00217218	10	0.000217218	0.00115674
		0.9969	1144	1	1143	2	1145	0.00174672	0.00172265		1	10.9988	0.0011947	10.9976	0.00238941	11	0.000217219	0.00115674
		0.9968	1159	1	1158	2	1160	0.00172414	0.00172265		1	11.9987	0.00130332	11.9974	0.00260664	12	0.00021722	0.00115674
		0.9965	1160	1	1159	2	1161	0.00172265	0.00172265		1	12.9986	0.00141194	12.9972	0.00282387	13	0.000217221	0.00115674
		0.9961	1160	2	1158	4	1162	0.00344234	0.00268456		1	13.9985	0.00152055	13.997	0.00304111	14	0.000217222	0.00115674
		0.9938	1179	2	1177	4	1181	0.00338696	0.00268456		1	14.9984	0.00162917	14.9967	0.00325834	15	0.000217223	0.00115674
		0.9921	1192	2	1190	4	1194	0.00335008	0.00268456		1	15.9983	0.00173779	15.9965	0.00347559	16	0.000217224	0.00115674
		0.9904	1196	2	1194	4	1198	0.0033389	0.00268456		1	16.9982	0.00184642	16.9963	0.00369283	17	0.000217226	0.00115674
		0.9898	1197	2	1195	4	1199	0.00333611	0.00268456		1	17.998	0.00195505	17.9961	0.00391009	18	0.000217227	0.00115674
		0.9891	1198	2	1196	4	1200	0.00333333	0.00268456		1	18.9979	0.00206368	18.9959	0.00412736	19	0.00021723	0.00115674
		0.9884	1199	2	1197	4	1201	0.00333056	0.00268456		1	19.9978	0.00217233	19.9957	0.00434466	20	0.000217233	0.00115674
		0.9878	1219	2	1217	4	1221	0.003276	0.00268456		1	20.9977	0.00228099	20.9954	0.00456199	21	0.000217238	0.00115674
		0.9868	1221	2	1219	4	1223	0.00327065	0.00268456		1	21.9976	0.00238969	21.9952	0.00477938	22	0.000217244	0.00115674
		0.9864	1222	2	1220	4	1224	0.00326797	0.00268456		1	22.9975	0.00249842	22.995	0.00499684	23	0.000217254	0.00115674
		0.9859	1223	2	1221	4	1225	0.00326531	0.00268456		1	23.9974	0.00260721	23.9948	0.00521442	24	0.000217268	0.00115674
		0.9856	1224	2	1222	4	1226	0.00326264	0.00268456		1	24.9973	0.00271608	24.9946	0.00543215	25	0.000217286	0.00115674
		0.9843	1226	2	1224	4	1228	0.00325733	0.00268456		1	25.9972	0.00282504	25.9943	0.00565008	26	0.000217311	0.00115674
		0.9834	1227	2	1225	4	1229	0.00325468	0.00268456		1	26.9971	0.00293414	26.9941	0.00586827	27	0.000217343	0.00115674
		0.9831	1240	2	1238	4	1242	0.00322061	0.00268456		1	27.997	0.00304339	27.9939	0.00608678	28	0.000217385	0.00115674
		0.983	1242	2	1240	4	1244	0.00321543	0.00268456		1	28.9968	0.00315284	28.9937	0.00630569	29	0.000217438	0.00115674
		0.9816	1243	2	1241	4	1245	0.00321285	0.00268456		1	29.9967	0.00326254	29.9935	0.00652508	30	0.000217503	0.00115674
		0.9813	1244	2	1242	4	1246	0.00321027	0.00268456		1	30.9966	0.00337252	30.9933	0.00674504	31	0.000217582	0.00115674
		0.9811	1270	2	1268	4	1272	0.00314465	0.00268456		1	31.9965	0.00348283	31.993	0.00696567	32	0.000217677	0.00115674
		0.9795	1271	2	1269	4	1273	0.00314218	0.00268456		1	32.9964	0.00359354	32.9928	0.00718708	33	0.00021779	0.00115674
		0.9786	1283	2	1281	4	1285	0.00311284	0.00268456		1	33.9963	0.00370469	33.9926	0.00740938	34	0.000217923	0.00115674
		0.9785	1292	2	1290	4	1294	0.00309119	0.00268456		1	34.9962	0.00381635	34.9924	0.00763269	35	0.000218077	0.00115674
		0.978	1294	2	1292	4	1296	0.00308642	0.00268456		1	35.9961	0.00392857	35.9921	0.00785714	36	0.000218254	0.00115674
		0.9776	1297	2	1295	4	1299	0.00307929	0.00268456		1	36.996	0.00404143	36.9919	0.00808285	37	0.000218455	0.00115674
		0.9767	1311	2	1309	4	1313	0.00304646	0.00268456		1	37.9958	0.00415498	37.9917	0.00830995	38	0.000218683	0.00115674
		0.9754	1312	2	1310	4	1314	0.00304414	0.00268456		1	38.9957	0.00426929	38.9915	0.00853859	39	0.000218938	0.00115674
		0.9751	1319	2	1317	4	1321	0.00302801	0.00268456		1	39.9956	0.00438444	39.9912	0.00876888	40	0.000219222	0.00115674
		0.9747	1324	2	1322	4	1326	0.00301659	0.00268456		1	40.9955	0.00450049	40.991	0.00900097	41	0.000219536	0.00115674
		0.9743	1336	2	1334	4	1338	0.00298954	0.00268456		1	41.9954	0.0046175	41.9908	0.009235	42	0.000219881	0.00115674
		0.9731	1337	2	1335	4	1339	0.0029873	0.00268456		1	42.9953	0.00473555	42.9905	0.0094711	43	0.000220258	0.00115674
		0.9729	1338	2	1336	4	1340	0.00298507	0.00268456		1	43.9951	0.0048547	43.9903	0.00970941	44	0.000220668	0.00115674
		0.9726	1342	2	1340	4	1344	0.00297619	0.00268456		1	44.995	0.00497503	44.99	0.00995005	45	0.000221112	0.00115674
		0.972	1343	2	1341	4	1345	0.00297398	0.00268456		1	45.9949	0.00509658	45.9898	0.0101932	46	0.000221591	0.00115674
		0.9718	1353	2	1351	4	1355	0.00295203	0.00268456		1	46.9948	0.00521944	46.9896	0.0104389	47	0.000222104	0.00115674
		0.971	1356	2	1354	4	1358	0.00294551	0.00268456		1	47.9947	0.00534366	47.9893	0.0106873	48	0.000222653	0.00115674
		0.9705	1357	2	1355	4	1359	0.00294334	0.00268456		1	48.9945	0.00546931	48.9891	0.0109386	49	0.000223237	0.00115674
		0.9704	1358	2	1356	4	1360	0.00294118	0.00268456		1	49.9944	0.00559644	49.9888	0.0111929	50	0.000223858	0.00115674
		0.9702	1360	2	1358	4	1362	0.00293686	0.00268456		1	50.9943	0.00572511	50.9885	0.0114502	51	0.000224514	0.00115674
		0.9691	1367	2	1365	4	1369	0.00292184	0.00268456		1	51.9941	0.00585538	51.9883	0.0117108	52	0.000225207	0.00115674
		0.9682	1380	2	1378	4	1382	0.00289436	0.00268456		1	52.994	0.0059873	52.988	0.0119746	53	0.000225936	0.00115674
		0.9681	1381	2	1379	4	1383	0.00289226	0.00268456		1	53.9939	0.00612093	53.9878	0.0122419	54	0.000226701	0.00115674
		0.9677	1391	2	1389	4	1393	0.0028715	0.00268456		1	54.9937	0.00625631	54.9875	0.0125126	55	0.000227502	0.00115674
		0.9672	1393	2	1391	4	1395	0.00286738	0.00268456		1	55.9936	0.00639348	55.9872	0.012787	56	0.000228339	0.00115674
		0.9664	1415	2	1413	4	1417	0.00282287	0.00268456		1	56.9935	0.00653251	56.9869	0.013065	57	0.000229211	0.00115674
		0.9659	1416	2	1414	4	1418	0.00282087	0.00268456		1	57.9933	0.00667342	57.9867	0.0133468	58	0.000230118	0.00115674
		0.9652	1417	2	1415	4	1419	0.00281889	0.00268456		1	58.9932	0.00681626	58.9864	0.0136325	59	0.00023106	0.00115674
		0.965	1419	2	1417	4	1421	0.00281492	0.00268456		1	59.993	0.00696107	59.9861	0.0139221	60	0.000232036	0.00115674
		0.9644	1420	2	1418	4	1422	0.00281294	0.00268456		1	60.9929	0.00710789	60.9858	0.0142158	61	0.000233046	0.00115674
		0.9641	1422	2	1420	4	1424	0.00280899	0.00268456		1	61.9927	0.00725675	61.9855	0.0145135	62	0.000234089	0.00115674
		0.9632	1426	2	1424	4	1428	0.00280112	0.00268456		1	62.9926	0.00740767	62.9852	0.0148153	63	0.000235164	0.00115674
		0.9631	1427	2	1425	4	1429	0.00279916	0.00268456		1	63.9924	0.00756071	63.9849	0.0151214	64	0.000236272	0.00115674
		0.963	1428	2	1426	4	1430	0.0027972	0.00268456		1	64.9923	0.00771587	64.9846	0.0154317	65	0.000237411	0.00115674
		0.962	1440	2	1438	4	1442	0.00277393	0.00268456		1	65.9921	0.00787319	65.9843	0.0157464	66	0.000238581	0.00115674
		0.9619	1447	2	1445	4	1449	0.00276052	0.00268456		1	66.992	0.00803269	66.9839	0.0160654	67	0.000239782	0.00115674
		0.9607	1448	2	1446	4	1450	0.00275862	0.00268456		1	67.9918	0.0081944	67.9836	0.0163888	68	0.000241012	0.00115674
		0.9595	1463	2	1461	4	1465	0.00273038	0.00268456		1	68.9916	0.00835834	68.9833	0.0167167	69	0.000242271	0.00115674
		0.9588	1464	2	1462	4	1466	0.00272851	0.00268456		1	69.9915	0.00852452	69.983	0.017049	70	0.000243558	0.00115674
		0.9583	1465	2	1463	4	1467	0.00272665	0.00268456		1	70.9913	0.00869297	70.9826	0.0173859	71	0.000244872	0.00115674
		0.9571	1466	2	1464	4	1468	0.0027248	0.00268456		1	71.9911	0.0088637	71.9823	0.0177274	72	0.000246214	0.00115674
		0.957	1467	2	1465	4	1469	0.00272294	0.00268456		1	72.991	0.00903672	72.9819	0.0180734	73	0.000247581	0.00115674
		0.9557	1469	2	1467	4	1471	0.00271924	0.00268456		1	73.9908	0.00921206	73.9816	0.0184241	74	0.000248975	0.00115674
		0.9553	1471	2	1469	4	1473	0.00271555	0.00268456		1	74.9906	0.00938972	74.9812	0.0187794	75	0.000250392	0.00115674
		0.9543	1474	2	1472	4	1476	0.00271003	0.00268456		1	75.9904	0.0095697	75.9809	0.0191394	76	0.000251834	0.00115674
		0.9529	1478	2	1476	4	1480	0.0027027	0.00268456		1	76.9902	0.00975204	76.9805	0.0195041	77	0.0002533	0.00115674
		0.9515	1482	2	1480	4	1484	0.00269542	0.00268456		1	77.9901	0.00993672	77.9801	0.0198734	78	0.000254788	0.00115674
		0.95	1483	2	1481	4	1485	0.0026936	0.00268456		1	78.9899	0.0101238	78.9798	0.0202475	79	0.000256298	0.00115674
		0.9498	1485	2	1483	4	1487	0.00268998	0.00268456		1	79.9897	0.0103132	79.9794	0.0206263	80	0.000257829	0.00115674
		0.949	1487	2	1485	4	1489	0.00268637	0.00268456		1	80.9895	0.0105049	80.979	0.0210099	81	0.000259381	0.00115674
		0.9485	1488	2	1486	4	1490	0.00268456	0.00268456		1	81.9893	0.0106991	81.9786	0.0213982	82	0.000260953	0.00115674
		0.9482	1488	3	1485	6	1491	0.00402414	0.00369686		1	82.9891	0.0108956	82.9782	0.0217912	83	0.000262545	0.00115674
		0.9475	1533	3	1530	6	1536	0.00390625	0.00369686		1	83.9889	0.0110945	83.9778	0.022189	84	0.000264155	0.00115674
		0.947	1578	3	1575	6	1581	0.00379507	0.00369686		1	84.9887	0.0112958	84.9774	0.0225916	85	0.000265783	0.00115674
		0.9469	1579	3	1576	6	1582	0.00379267	0.00369686		1	85.9885	0.0114995	85.977	0.0229989	86	0.000267429	0.00115674
		0.9453	1595	3	1592	6	1598	0.00375469	0.00369686		1	86.9883	0.0117055	86.9766	0.023411	87	0.000269092	0.00115674
		0.945	1596	3	1593	6	1599	0.00375235	0.00369686		1	87.9881	0.0119139	87.9762	0.0238279	88	0.000270771	0.00115674
		0.9436	1598	3	1595	6	1601	0.00374766	0.00369686		1	88.9879	0.0121247	88.9758	0.0242495	89	0.000272466	0.00115674
		0.9433	1603	3	1600	6	1606	0.00373599	0.00369686		1	89.9877	0.0123379	89.9753	0.0246758	90	0.000274176	0.00115674
		0.9431	1604	3	1601	6	1607	0.00373367	0.00369686		1	90.9874	0.0125535	90.9749	0.025107	91	0.000275901	0.00115674
		0.9419	1606	3	1603	6	1609	0.00372902	0.00369686		1	91.9872	0.0127714	91.9745	0.0255428	92	0.000277639	0.00115674
[truncated: 10,149 more rows]

## Sheet: Search Summary
	ProteinPilot™ Software Report
[truncated: 41 more rows]

[truncated: 12 more sheets: Advanced Metadata, Speed and Distribution Analysis, Single Results Table, Protein FDR Summary, Distinct Peptide FDR Summary, Spectrum FDR Summary, PDST Controls, Protein Summary, Peptide Summary, Distinct Peptide Summary, Feature Summary, Single Column Summary]
