# Supplementary material for: In vivo proteomic mapping through GFP-directed proximity-dependent biotin labelling in zebrafish
Source: eLife. 2021 Feb 16;10:e64631. doi: 10.7554/eLife.64631 (PMC7906605; doi:10.7554/eLife.64631)
Supplement: Figure 5—source data 6. [file elife-64631-fig5-data6.xlsx]

## Sheet: Metadata
_RESULTS_version	5
RESULTS_SEARCH_STAT_search_begin_time_clock	01/19/2021 16:12:40
RESULTS_SEARCH_STAT_search_end_time_clock	01/20/2021 20:25:54
RESULTS_SEARCH_STAT_search_time_duration	#VALUE!
RESULTS_SEARCH_STAT_stage_signal_processing_begin_time_clock	01/19/2021 16:12:41
RESULTS_SEARCH_STAT_stage_signal_processing_end_time_clock	01/20/2021 17:10:09
RESULTS_SEARCH_STAT_stage_signal_processing_time_duration	#VALUE!
RESULTS_SEARCH_STAT_stage_waiting_begin_time_clock	01/20/2021 17:10:09
RESULTS_SEARCH_STAT_stage_waiting_end_time_clock	01/20/2021 17:14:15
RESULTS_SEARCH_STAT_stage_waiting_time_duration	2574-06-07
RESULTS_SEARCH_STAT_stage_searching_begin_time_clock	01/20/2021 17:14:15
RESULTS_SEARCH_STAT_stage_searching_end_time_clock	01/20/2021 20:24:16
RESULTS_SEARCH_STAT_stage_searching_time_duration	#VALUE!
RESULTS_SEARCH_STAT_stage_fdr_begin_time_clock	01/20/2021 20:24:16
RESULTS_SEARCH_STAT_stage_fdr_end_time_clock	01/20/2021 20:25:54
RESULTS_SEARCH_STAT_stage_fdr_time_duration	2168-01-23
RESULTS_SEARCH_STAT_task_fraglet_exe_begin_time_clock	01/20/2021 18:29:58
RESULTS_SEARCH_STAT_task_fraglet_exe_end_time_clock	01/20/2021 19:28:14
RESULTS_SEARCH_STAT_task_fraglet_exe_time_duration	3496063
RESULTS_SEARCH_STAT_task_fraglet_exe_time_cpu	#VALUE!
RESULTS_SEARCH_STAT_task_taglet_exe_begin_time_clock	01/20/2021 19:34:38
RESULTS_SEARCH_STAT_task_taglet_exe_end_time_clock	01/20/2021 20:12:18
RESULTS_SEARCH_STAT_task_taglet_exe_time_duration	2260370
RESULTS_SEARCH_STAT_task_taglet_exe_time_cpu	#VALUE!
RESULTS_SEARCH_STAT_task_progroup_begin_time_clock	01/20/2021 20:12:18
RESULTS_SEARCH_STAT_task_progroup_end_time_clock	01/20/2021 20:24:16
RESULTS_SEARCH_STAT_task_progroup_time_duration	717393
RESULTS_SEARCH_STAT_task_progroup_time_cpu	4194-12-06
RESULTS_SEARCH_STAT_task_focusing_begin_time_clock	01/20/2021 19:28:14
RESULTS_SEARCH_STAT_task_focusing_end_time_clock	01/20/2021 19:34:38
RESULTS_SEARCH_STAT_task_focusing_time_duration	383759
RESULTS_SEARCH_STAT_task_focusing_time_cpu	503430
RESULTS_SEARCH_STAT_computer_memory	32767
RESULTS_SEARCH_STAT_computer_name	IMB-MASS02
RESULTS_SEARCH_STAT_num_proteins	150424
RESULTS_SEARCH_STAT_num_residues	75708562
RESULTS_SEARCH_STAT_number_cores	8
RESULTS_SEARCH_STAT_number_licensed_tasks	16
RESULTS_SEARCH_STAT_number_processors	8
RESULTS_SEARCH_STAT_os	Windows Server 2008 R2 Standard (6.1.7600)
RESULTS_SEARCH_1_time_cpu	204002
RESULTS_SEARCH_1_time_duration	207222
RESULTS_SEARCH_1_version	5.0.1.4874
RESULTS_SEARCH_1_xml:id	SEARCH:1:637466695384099484_0
RESULTS_SEARCH_1_PARAMETERS_chemical_data_edited	FALSE
RESULTS_SEARCH_1_PARAMETERS_do_multiprecursor_search	TRUE
RESULTS_SEARCH_1_PARAMETERS_do_reverse_search	TRUE
RESULTS_SEARCH_1_PARAMETERS_max_quant_labels	35
RESULTS_SEARCH_1_PARAMETERS_maxresults	15
RESULTS_SEARCH_1_PARAMETERS_separate_searches	FALSE
RESULTS_SEARCH_1_PARAMETERS_MSTOLERANCE_type	dalton
RESULTS_SEARCH_1_PARAMETERS_MSTOLERANCE_value	0.05
RESULTS_SEARCH_1_PARAMETERS_MSMSTOLERANCE_type	dalton
RESULTS_SEARCH_1_PARAMETERS_MSMSTOLERANCE_value	0.1
RESULTS_SEARCH_1_PARAMETERS_MS_STANDARD_DEVIATION_type	dalton
RESULTS_SEARCH_1_PARAMETERS_MS_STANDARD_DEVIATION_value	0.0011
RESULTS_SEARCH_1_PARAMETERS_MSMS_STANDARD_DEVIATION_type	dalton
RESULTS_SEARCH_1_PARAMETERS_MSMS_STANDARD_DEVIATION_value	0.01
RESULTS_SEARCH_1_PARAMETERS_FASTA_filename	C:\AB SCIEX\ProteinPilot Data\SearchDatabases\uniprot-zebrafish_with_Clover.fasta
RESULTS_SEARCH_1_PARAMETERS_AUTO_CALIBRATION_ms	TRUE
RESULTS_SEARCH_1_PARAMETERS_AUTO_CALIBRATION_msexport	FALSE
RESULTS_SEARCH_1_PARAMETERS_AUTO_CALIBRATION_msms	TRUE
RESULTS_SEARCH_1_PARAMETERS_AUTO_CALIBRATION_msmstolsdratio	2.75
RESULTS_SEARCH_1_PARAMETERS_AUTO_CALIBRATION_mstolsdratio	7
RESULTS_SEARCH_1_PARAMETERS_AUTO_CALIBRATION_squareroot	TRUE
RESULTS_SEARCH_1_PARAMETERS_AUTO_CALIBRATION_type	dalton
RESULTS_SEARCH_1_PARAMETERS_AUTO_CALIBRATION_MCP_d_s_s_f	0.0666667
RESULTS_SEARCH_1_PARAMETERS_AUTO_CALIBRATION_MCP_d_s_w_f	3
RESULTS_SEARCH_1_PARAMETERS_AUTO_CALIBRATION_MCP_m_f_r_mbc	200
RESULTS_SEARCH_1_PARAMETERS_AUTO_CALIBRATION_MCP_m_m_c	10
RESULTS_SEARCH_1_PARAMETERS_AUTO_CALIBRATION_MCP_m_m_f_s	0.25
RESULTS_SEARCH_1_PARAMETERS_AUTO_CALIBRATION_MCP_m_m_p_f	0.33
RESULTS_SEARCH_1_PARAMETERS_AUTO_CALIBRATION_MCP_m_m_p_rms_f	1
RESULTS_SEARCH_1_PARAMETERS_AUTO_CALIBRATION_MCP_m_p_t_f	1
RESULTS_SEARCH_1_PARAMETERS_AUTO_CALIBRATION_MCP_m_r_h_n_b	15
RESULTS_SEARCH_1_PARAMETERS_AUTO_CALIBRATION_MCP_m_z_n_s	99
RESULTS_SEARCH_1_PARAMETERS_AUTO_CALIBRATION_MCP_m_z_s_mn_f_r	0.0666667
RESULTS_SEARCH_1_PARAMETERS_AUTO_CALIBRATION_MCP_m_z_s_mx_f_r	0.1
RESULTS_SEARCH_1_PARAMETERS_MAX_PRECURSORS_FRAGLET	5
RESULTS_SEARCH_1_PARAMETERS_MAX_PRECURSORS_TAGLET	1
RESULTS_SEARCH_1_PARAMETERS_PRECURSORS_DR_FRAGLET	10
RESULTS_SEARCH_1_PARAMETERS_PRECURSORS_DR_TAGLET	3
RESULTS_SEARCH_1_PARAMETERS_DEFAULT_CHARGE_STATE_1_charge	2
RESULTS_SEARCH_1_PARAMETERS_DEFAULT_CHARGE_STATE_1_probability	1
RESULTS_SEARCH_1_PARAMETERS_DEFAULT_CHARGE_STATE_2_charge	3
RESULTS_SEARCH_1_PARAMETERS_DEFAULT_CHARGE_STATE_2_probability	1
RESULTS_SEARCH_1_PARAMETERS_DEFAULT_CHARGE_STATE_3_charge	4
RESULTS_SEARCH_1_PARAMETERS_DEFAULT_CHARGE_STATE_3_probability	1
RESULTS_SEARCH_1_PARAMETERS_VERSION	5.0.1.0, 4895
RESULTS_SEARCH_1_PARAMETERS_PARAGON_VERSION	5.0.1.0, 4874
RESULTS_SEARCH_1_PARAMETERS_APPLICATION	ProteinPilot(tm) Software
RESULTS_SEARCH_1_PARAMETERS_PROGROUP_alternativedispositionmaximumfoldprobabilitydrop	100
RESULTS_SEARCH_1_PARAMETERS_PROGROUP_alternativedispositionmaximumfoldscoredrop	2
RESULTS_SEARCH_1_PARAMETERS_PROGROUP_autodiscordantpeptidethreshold	0.3
RESULTS_SEARCH_1_PARAMETERS_PROGROUP_bayesconfidencecalclulation	TRUE
RESULTS_SEARCH_1_PARAMETERS_PROGROUP_calibrateconfidence	TRUE
RESULTS_SEARCH_1_PARAMETERS_PROGROUP_compresspeptides	FALSE
RESULTS_SEARCH_1_PARAMETERS_PROGROUP_confidencepercentthresholdforexcludingothersfromquant	15
RESULTS_SEARCH_1_PARAMETERS_PROGROUP_confidencepercentthresholdforincludingselfinquant	15
RESULTS_SEARCH_1_PARAMETERS_PROGROUP_donotstoremspeaklists	FALSE
RESULTS_SEARCH_1_PARAMETERS_PROGROUP_fasta	C:\AB SCIEX\ProteinPilot Data\SearchDatabases\uniprot-zebrafish_with_Clover.fasta
RESULTS_SEARCH_1_PARAMETERS_PROGROUP_featuregroupminpepconf	0.66
RESULTS_SEARCH_1_PARAMETERS_PROGROUP_featuregroupminups	0.47
RESULTS_SEARCH_1_PARAMETERS_PROGROUP_focusingintersection	4
RESULTS_SEARCH_1_PARAMETERS_PROGROUP_focusingminimummatchconfidence	0.1
RESULTS_SEARCH_1_PARAMETERS_PROGROUP_focusingminunusedprotscore	0.1
RESULTS_SEARCH_1_PARAMETERS_PROGROUP_focusingsubsetcutoff	6
RESULTS_SEARCH_1_PARAMETERS_PROGROUP_intersection	1.3
RESULTS_SEARCH_1_PARAMETERS_PROGROUP_minimummatchconfidencecutoff	0.001
RESULTS_SEARCH_1_PARAMETERS_PROGROUP_minunusedprotscore	0.0458
RESULTS_SEARCH_1_PARAMETERS_PROGROUP_subsetcutoff	2
RESULTS_SEARCH_1_PARAMETERS_PROGROUP_unusedprotscorethresholdforexcludingothersfromquant	1.3
RESULTS_SEARCH_1_PARAMETERS_PEAKLIST_count	2069
RESULTS_SEARCH_1_PARAMETERS_PEAKLIST_filenumber	1
RESULTS_SEARCH_1_PARAMETERS_PEAKLIST_original_count	2069
RESULTS_SEARCH_1_PARAMETERS_PEAKLIST_originalfilename	C:\AB SCIEX\ProteinPilot Data\Results\Albert\ZX 20200624 6600\ZX 20200624 C4B Control 1.wiff
RESULTS_SEARCH_1_PARAMETERS_PEAKLIST_partnumber	1
RESULTS_SEARCH_1_PARAMETERS_QUANT_TYPE_background_correction	FALSE
RESULTS_SEARCH_1_PARAMETERS_QUANT_TYPE_bias_correction	TRUE
RESULTS_SEARCH_1_PARAMETERS_QUANT_TYPE_keep_extreme_peptides_over_fraction	0
RESULTS_SEARCH_1_PARAMETERS_QUANT_TYPE_low_confidence_check	TRUE
RESULTS_SEARCH_1_PARAMETERS_QUANT_TYPE_low_intensity_check	TRUE
RESULTS_SEARCH_1_PARAMETERS_QUANT_TYPE_median_statistic	TRUE
RESULTS_SEARCH_1_PARAMETERS_QUANT_TYPE_mod_check	TRUE
RESULTS_SEARCH_1_PARAMETERS_QUANT_TYPE_quant_threshold	-1
RESULTS_SEARCH_1_PARAMETERS_QUANT_TYPE_quant_threshold_sn	9
RESULTS_SEARCH_1_PARAMETERS_QUANT_TYPE_separate_searches	FALSE
RESULTS_SEARCH_1_PARAMETERS_QUANT_TYPE_shared_msms_check	TRUE
RESULTS_SEARCH_1_PARAMETERS_PARAGON_METHOD_SETTINGS_UI_SAMPLE_TYPE	Identification
RESULTS_SEARCH_1_PARAMETERS_PARAGON_METHOD_SETTINGS_UI_CYS_ALKYLATION	Iodoacetamide w other Cys mods possible
RESULTS_SEARCH_1_PARAMETERS_PARAGON_METHOD_SETTINGS_UI_DIGESTION	Trypsin + Lys C
RESULTS_SEARCH_1_PARAMETERS_PARAGON_METHOD_SETTINGS_UI_SPECIAL_FACTOR	Gel-based ID
RESULTS_SEARCH_1_PARAMETERS_PARAGON_METHOD_SETTINGS_UI_INSTRUMENT	TripleTOF 6600
RESULTS_SEARCH_1_PARAMETERS_PARAGON_METHOD_SETTINGS_UI_SEARCH_EFFORT	Thorough
RESULTS_SEARCH_1_PARAMETERS_PARAGON_METHOD_SETTINGS_UI_USER_NAME	IMB-MASS02\massuser
RESULTS_SEARCH_1_PARAMETERS_PARAGON_METHOD_SETTINGS_UI_MACHINE_NAME	IMB-MASS02
RESULTS_SEARCH_1_PARAMETERS_PARAGON_METHOD_SETTINGS_UI_SEARCH_ID	6.37467e+17
RESULTS_SEARCH_1_PARAMETERS_PARAGON_METHOD_SETTINGS_UI_START_TIME	2021-01-19 16:12:40
RESULTS_SEARCH_1_PARAMETERS_PARAGON_METHOD_SETTINGS_UI_MIN_UNUSED_PROTSCORE	0.0458
RESULTS_SEARCH_1_PARAMETERS_PARAGON_METHOD_SETTINGS_UI_PSPEP	TRUE
RESULTS_SEARCH_2_time_cpu	2739-04-12
RESULTS_SEARCH_2_time_duration	306660
RESULTS_SEARCH_2_version	5.0.1.4874
RESULTS_SEARCH_2_xml:id	SEARCH:2:637466695384099484_0
RESULTS_SEARCH_2_PARAMETERS_chemical_data_edited	FALSE
RESULTS_SEARCH_2_PARAMETERS_do_multiprecursor_search	TRUE
RESULTS_SEARCH_2_PARAMETERS_do_reverse_search	TRUE
RESULTS_SEARCH_2_PARAMETERS_max_quant_labels	35
RESULTS_SEARCH_2_PARAMETERS_maxresults	15
RESULTS_SEARCH_2_PARAMETERS_separate_searches	FALSE
RESULTS_SEARCH_2_PARAMETERS_MSTOLERANCE_type	dalton
RESULTS_SEARCH_2_PARAMETERS_MSTOLERANCE_value	0.05
RESULTS_SEARCH_2_PARAMETERS_MSMSTOLERANCE_type	dalton
RESULTS_SEARCH_2_PARAMETERS_MSMSTOLERANCE_value	0.1
RESULTS_SEARCH_2_PARAMETERS_MS_STANDARD_DEVIATION_type	dalton
RESULTS_SEARCH_2_PARAMETERS_MS_STANDARD_DEVIATION_value	0.0011
RESULTS_SEARCH_2_PARAMETERS_MSMS_STANDARD_DEVIATION_type	dalton
RESULTS_SEARCH_2_PARAMETERS_MSMS_STANDARD_DEVIATION_value	0.01
RESULTS_SEARCH_2_PARAMETERS_FASTA_filename	C:\AB SCIEX\ProteinPilot Data\SearchDatabases\uniprot-zebrafish_with_Clover.fasta
RESULTS_SEARCH_2_PARAMETERS_AUTO_CALIBRATION_ms	TRUE
RESULTS_SEARCH_2_PARAMETERS_AUTO_CALIBRATION_msexport	FALSE
RESULTS_SEARCH_2_PARAMETERS_AUTO_CALIBRATION_msms	TRUE
RESULTS_SEARCH_2_PARAMETERS_AUTO_CALIBRATION_msmstolsdratio	2.75
RESULTS_SEARCH_2_PARAMETERS_AUTO_CALIBRATION_mstolsdratio	7
RESULTS_SEARCH_2_PARAMETERS_AUTO_CALIBRATION_squareroot	TRUE
RESULTS_SEARCH_2_PARAMETERS_AUTO_CALIBRATION_type	dalton
RESULTS_SEARCH_2_PARAMETERS_AUTO_CALIBRATION_MCP_d_s_s_f	0.0666667
RESULTS_SEARCH_2_PARAMETERS_AUTO_CALIBRATION_MCP_d_s_w_f	3
RESULTS_SEARCH_2_PARAMETERS_AUTO_CALIBRATION_MCP_m_f_r_mbc	200
RESULTS_SEARCH_2_PARAMETERS_AUTO_CALIBRATION_MCP_m_m_c	10
RESULTS_SEARCH_2_PARAMETERS_AUTO_CALIBRATION_MCP_m_m_f_s	0.25
RESULTS_SEARCH_2_PARAMETERS_AUTO_CALIBRATION_MCP_m_m_p_f	0.33
RESULTS_SEARCH_2_PARAMETERS_AUTO_CALIBRATION_MCP_m_m_p_rms_f	1
RESULTS_SEARCH_2_PARAMETERS_AUTO_CALIBRATION_MCP_m_p_t_f	1
RESULTS_SEARCH_2_PARAMETERS_AUTO_CALIBRATION_MCP_m_r_h_n_b	15
RESULTS_SEARCH_2_PARAMETERS_AUTO_CALIBRATION_MCP_m_z_n_s	99
RESULTS_SEARCH_2_PARAMETERS_AUTO_CALIBRATION_MCP_m_z_s_mn_f_r	0.0666667
RESULTS_SEARCH_2_PARAMETERS_AUTO_CALIBRATION_MCP_m_z_s_mx_f_r	0.1
RESULTS_SEARCH_2_PARAMETERS_MAX_PRECURSORS_FRAGLET	5
RESULTS_SEARCH_2_PARAMETERS_MAX_PRECURSORS_TAGLET	1
RESULTS_SEARCH_2_PARAMETERS_PRECURSORS_DR_FRAGLET	10
RESULTS_SEARCH_2_PARAMETERS_PRECURSORS_DR_TAGLET	3
RESULTS_SEARCH_2_PARAMETERS_DEFAULT_CHARGE_STATE_1_charge	2
RESULTS_SEARCH_2_PARAMETERS_DEFAULT_CHARGE_STATE_1_probability	1
RESULTS_SEARCH_2_PARAMETERS_DEFAULT_CHARGE_STATE_2_charge	3
RESULTS_SEARCH_2_PARAMETERS_DEFAULT_CHARGE_STATE_2_probability	1
RESULTS_SEARCH_2_PARAMETERS_DEFAULT_CHARGE_STATE_3_charge	4
RESULTS_SEARCH_2_PARAMETERS_DEFAULT_CHARGE_STATE_3_probability	1
RESULTS_SEARCH_2_PARAMETERS_VERSION	5.0.1.0, 4895
RESULTS_SEARCH_2_PARAMETERS_PARAGON_VERSION	5.0.1.0, 4874
RESULTS_SEARCH_2_PARAMETERS_APPLICATION	ProteinPilot(tm) Software
RESULTS_SEARCH_2_PARAMETERS_PROGROUP_alternativedispositionmaximumfoldprobabilitydrop	100
RESULTS_SEARCH_2_PARAMETERS_PROGROUP_alternativedispositionmaximumfoldscoredrop	2
RESULTS_SEARCH_2_PARAMETERS_PROGROUP_autodiscordantpeptidethreshold	0.3
RESULTS_SEARCH_2_PARAMETERS_PROGROUP_bayesconfidencecalclulation	TRUE
RESULTS_SEARCH_2_PARAMETERS_PROGROUP_calibrateconfidence	TRUE
RESULTS_SEARCH_2_PARAMETERS_PROGROUP_compresspeptides	FALSE
RESULTS_SEARCH_2_PARAMETERS_PROGROUP_confidencepercentthresholdforexcludingothersfromquant	15
RESULTS_SEARCH_2_PARAMETERS_PROGROUP_confidencepercentthresholdforincludingselfinquant	15
RESULTS_SEARCH_2_PARAMETERS_PROGROUP_donotstoremspeaklists	FALSE
RESULTS_SEARCH_2_PARAMETERS_PROGROUP_fasta	C:\AB SCIEX\ProteinPilot Data\SearchDatabases\uniprot-zebrafish_with_Clover.fasta
RESULTS_SEARCH_2_PARAMETERS_PROGROUP_featuregroupminpepconf	15:50:24
RESULTS_SEARCH_2_PARAMETERS_PROGROUP_featuregroupminups	0.47
RESULTS_SEARCH_2_PARAMETERS_PROGROUP_focusingintersection	4
RESULTS_SEARCH_2_PARAMETERS_PROGROUP_focusingminimummatchconfidence	0.1
RESULTS_SEARCH_2_PARAMETERS_PROGROUP_focusingminunusedprotscore	0.1
RESULTS_SEARCH_2_PARAMETERS_PROGROUP_focusingsubsetcutoff	6
RESULTS_SEARCH_2_PARAMETERS_PROGROUP_intersection	1.3
RESULTS_SEARCH_2_PARAMETERS_PROGROUP_minimummatchconfidencecutoff	0.001
RESULTS_SEARCH_2_PARAMETERS_PROGROUP_minunusedprotscore	0.0458
RESULTS_SEARCH_2_PARAMETERS_PROGROUP_subsetcutoff	2
RESULTS_SEARCH_2_PARAMETERS_PROGROUP_unusedprotscorethresholdforexcludingothersfromquant	1.3
RESULTS_SEARCH_2_PARAMETERS_PEAKLIST_count	2069
RESULTS_SEARCH_2_PARAMETERS_PEAKLIST_filenumber	1
RESULTS_SEARCH_2_PARAMETERS_PEAKLIST_original_count	2069
RESULTS_SEARCH_2_PARAMETERS_PEAKLIST_originalfilename	C:\AB SCIEX\ProteinPilot Data\Results\Albert\ZX 20200624 6600\ZX 20200624 C4B Control 1.wiff
RESULTS_SEARCH_2_PARAMETERS_PEAKLIST_partnumber	1
RESULTS_SEARCH_2_PARAMETERS_QUANT_TYPE_background_correction	FALSE
RESULTS_SEARCH_2_PARAMETERS_QUANT_TYPE_bias_correction	TRUE
RESULTS_SEARCH_2_PARAMETERS_QUANT_TYPE_keep_extreme_peptides_over_fraction	0
RESULTS_SEARCH_2_PARAMETERS_QUANT_TYPE_low_confidence_check	TRUE
RESULTS_SEARCH_2_PARAMETERS_QUANT_TYPE_low_intensity_check	TRUE
RESULTS_SEARCH_2_PARAMETERS_QUANT_TYPE_median_statistic	TRUE
RESULTS_SEARCH_2_PARAMETERS_QUANT_TYPE_mod_check	TRUE
RESULTS_SEARCH_2_PARAMETERS_QUANT_TYPE_quant_threshold	-1
RESULTS_SEARCH_2_PARAMETERS_QUANT_TYPE_quant_threshold_sn	9
RESULTS_SEARCH_2_PARAMETERS_QUANT_TYPE_separate_searches	FALSE
RESULTS_SEARCH_2_PARAMETERS_QUANT_TYPE_shared_msms_check	TRUE
RESULTS_SEARCH_2_PARAMETERS_PARAGON_METHOD_SETTINGS_UI_SAMPLE_TYPE	Identification
RESULTS_SEARCH_2_PARAMETERS_PARAGON_METHOD_SETTINGS_UI_CYS_ALKYLATION	Iodoacetamide w other Cys mods possible
RESULTS_SEARCH_2_PARAMETERS_PARAGON_METHOD_SETTINGS_UI_DIGESTION	Trypsin + Lys C
RESULTS_SEARCH_2_PARAMETERS_PARAGON_METHOD_SETTINGS_UI_SPECIAL_FACTOR	Gel-based ID
RESULTS_SEARCH_2_PARAMETERS_PARAGON_METHOD_SETTINGS_UI_INSTRUMENT	TripleTOF 6600
RESULTS_SEARCH_2_PARAMETERS_PARAGON_METHOD_SETTINGS_UI_SEARCH_EFFORT	Thorough
RESULTS_SEARCH_2_PARAMETERS_PARAGON_METHOD_SETTINGS_UI_USER_NAME	IMB-MASS02\massuser
RESULTS_SEARCH_2_PARAMETERS_PARAGON_METHOD_SETTINGS_UI_MACHINE_NAME	IMB-MASS02
RESULTS_SEARCH_2_PARAMETERS_PARAGON_METHOD_SETTINGS_UI_SEARCH_ID	6.37467e+17
RESULTS_SEARCH_2_PARAMETERS_PARAGON_METHOD_SETTINGS_UI_START_TIME	2021-01-19 16:12:40
RESULTS_SEARCH_2_PARAMETERS_PARAGON_METHOD_SETTINGS_UI_MIN_UNUSED_PROTSCORE	0.0458
RESULTS_SEARCH_2_PARAMETERS_PARAGON_METHOD_SETTINGS_UI_PSPEP	TRUE
RESULTS_SEARCH_3_time_cpu	185266
RESULTS_SEARCH_3_time_duration	188704
RESULTS_SEARCH_3_version	5.0.1.4874
RESULTS_SEARCH_3_xml:id	SEARCH:1:637466695384099484_1
RESULTS_SEARCH_3_PARAMETERS_chemical_data_edited	FALSE
RESULTS_SEARCH_3_PARAMETERS_do_multiprecursor_search	TRUE
RESULTS_SEARCH_3_PARAMETERS_do_reverse_search	TRUE
RESULTS_SEARCH_3_PARAMETERS_max_quant_labels	35
RESULTS_SEARCH_3_PARAMETERS_maxresults	15
RESULTS_SEARCH_3_PARAMETERS_separate_searches	FALSE
RESULTS_SEARCH_3_PARAMETERS_MSTOLERANCE_type	dalton
RESULTS_SEARCH_3_PARAMETERS_MSTOLERANCE_value	0.05
RESULTS_SEARCH_3_PARAMETERS_MSMSTOLERANCE_type	dalton
RESULTS_SEARCH_3_PARAMETERS_MSMSTOLERANCE_value	0.1
RESULTS_SEARCH_3_PARAMETERS_MS_STANDARD_DEVIATION_type	dalton
RESULTS_SEARCH_3_PARAMETERS_MS_STANDARD_DEVIATION_value	0.0011
RESULTS_SEARCH_3_PARAMETERS_MSMS_STANDARD_DEVIATION_type	dalton
RESULTS_SEARCH_3_PARAMETERS_MSMS_STANDARD_DEVIATION_value	0.01
RESULTS_SEARCH_3_PARAMETERS_FASTA_filename	C:\AB SCIEX\ProteinPilot Data\SearchDatabases\uniprot-zebrafish_with_Clover.fasta
RESULTS_SEARCH_3_PARAMETERS_AUTO_CALIBRATION_ms	TRUE
RESULTS_SEARCH_3_PARAMETERS_AUTO_CALIBRATION_msexport	FALSE
RESULTS_SEARCH_3_PARAMETERS_AUTO_CALIBRATION_msms	TRUE
RESULTS_SEARCH_3_PARAMETERS_AUTO_CALIBRATION_msmstolsdratio	2.75
RESULTS_SEARCH_3_PARAMETERS_AUTO_CALIBRATION_mstolsdratio	7
RESULTS_SEARCH_3_PARAMETERS_AUTO_CALIBRATION_squareroot	TRUE
RESULTS_SEARCH_3_PARAMETERS_AUTO_CALIBRATION_type	dalton
RESULTS_SEARCH_3_PARAMETERS_AUTO_CALIBRATION_MCP_d_s_s_f	0.0666667
RESULTS_SEARCH_3_PARAMETERS_AUTO_CALIBRATION_MCP_d_s_w_f	3
RESULTS_SEARCH_3_PARAMETERS_AUTO_CALIBRATION_MCP_m_f_r_mbc	200
RESULTS_SEARCH_3_PARAMETERS_AUTO_CALIBRATION_MCP_m_m_c	10
RESULTS_SEARCH_3_PARAMETERS_AUTO_CALIBRATION_MCP_m_m_f_s	0.25
RESULTS_SEARCH_3_PARAMETERS_AUTO_CALIBRATION_MCP_m_m_p_f	0.33
RESULTS_SEARCH_3_PARAMETERS_AUTO_CALIBRATION_MCP_m_m_p_rms_f	1
RESULTS_SEARCH_3_PARAMETERS_AUTO_CALIBRATION_MCP_m_p_t_f	1
RESULTS_SEARCH_3_PARAMETERS_AUTO_CALIBRATION_MCP_m_r_h_n_b	15
RESULTS_SEARCH_3_PARAMETERS_AUTO_CALIBRATION_MCP_m_z_n_s	1900-04-08
RESULTS_SEARCH_3_PARAMETERS_AUTO_CALIBRATION_MCP_m_z_s_mn_f_r	0.0666667
RESULTS_SEARCH_3_PARAMETERS_AUTO_CALIBRATION_MCP_m_z_s_mx_f_r	0.1
RESULTS_SEARCH_3_PARAMETERS_MAX_PRECURSORS_FRAGLET	5
RESULTS_SEARCH_3_PARAMETERS_MAX_PRECURSORS_TAGLET	1
RESULTS_SEARCH_3_PARAMETERS_PRECURSORS_DR_FRAGLET	10
RESULTS_SEARCH_3_PARAMETERS_PRECURSORS_DR_TAGLET	3
RESULTS_SEARCH_3_PARAMETERS_DEFAULT_CHARGE_STATE_1_charge	2
RESULTS_SEARCH_3_PARAMETERS_DEFAULT_CHARGE_STATE_1_probability	1
RESULTS_SEARCH_3_PARAMETERS_DEFAULT_CHARGE_STATE_2_charge	3
RESULTS_SEARCH_3_PARAMETERS_DEFAULT_CHARGE_STATE_2_probability	1
RESULTS_SEARCH_3_PARAMETERS_DEFAULT_CHARGE_STATE_3_charge	4
RESULTS_SEARCH_3_PARAMETERS_DEFAULT_CHARGE_STATE_3_probability	1
RESULTS_SEARCH_3_PARAMETERS_VERSION	5.0.1.0, 4895
RESULTS_SEARCH_3_PARAMETERS_PARAGON_VERSION	5.0.1.0, 4874
RESULTS_SEARCH_3_PARAMETERS_APPLICATION	ProteinPilot(tm) Software
RESULTS_SEARCH_3_PARAMETERS_PROGROUP_alternativedispositionmaximumfoldprobabilitydrop	100
RESULTS_SEARCH_3_PARAMETERS_PROGROUP_alternativedispositionmaximumfoldscoredrop	2
RESULTS_SEARCH_3_PARAMETERS_PROGROUP_autodiscordantpeptidethreshold	07:12:00
RESULTS_SEARCH_3_PARAMETERS_PROGROUP_bayesconfidencecalclulation	TRUE
RESULTS_SEARCH_3_PARAMETERS_PROGROUP_calibrateconfidence	TRUE
RESULTS_SEARCH_3_PARAMETERS_PROGROUP_compresspeptides	FALSE
RESULTS_SEARCH_3_PARAMETERS_PROGROUP_confidencepercentthresholdforexcludingothersfromquant	15
RESULTS_SEARCH_3_PARAMETERS_PROGROUP_confidencepercentthresholdforincludingselfinquant	15
RESULTS_SEARCH_3_PARAMETERS_PROGROUP_donotstoremspeaklists	FALSE
RESULTS_SEARCH_3_PARAMETERS_PROGROUP_fasta	C:\AB SCIEX\ProteinPilot Data\SearchDatabases\uniprot-zebrafish_with_Clover.fasta
RESULTS_SEARCH_3_PARAMETERS_PROGROUP_featuregroupminpepconf	0.66
RESULTS_SEARCH_3_PARAMETERS_PROGROUP_featuregroupminups	0.47
RESULTS_SEARCH_3_PARAMETERS_PROGROUP_focusingintersection	4
RESULTS_SEARCH_3_PARAMETERS_PROGROUP_focusingminimummatchconfidence	0.1
RESULTS_SEARCH_3_PARAMETERS_PROGROUP_focusingminunusedprotscore	0.1
RESULTS_SEARCH_3_PARAMETERS_PROGROUP_focusingsubsetcutoff	6
RESULTS_SEARCH_3_PARAMETERS_PROGROUP_intersection	1.3
RESULTS_SEARCH_3_PARAMETERS_PROGROUP_minimummatchconfidencecutoff	0.001
RESULTS_SEARCH_3_PARAMETERS_PROGROUP_minunusedprotscore	0.0458
RESULTS_SEARCH_3_PARAMETERS_PROGROUP_subsetcutoff	2
RESULTS_SEARCH_3_PARAMETERS_PROGROUP_unusedprotscorethresholdforexcludingothersfromquant	1.3
RESULTS_SEARCH_3_PARAMETERS_PEAKLIST_count	1971
RESULTS_SEARCH_3_PARAMETERS_PEAKLIST_filenumber	2
RESULTS_SEARCH_3_PARAMETERS_PEAKLIST_original_count	1971
RESULTS_SEARCH_3_PARAMETERS_PEAKLIST_originalfilename	C:\AB SCIEX\ProteinPilot Data\Results\Albert\ZX 20200624 6600\ZX 20200624 C4B Control 2.wiff
RESULTS_SEARCH_3_PARAMETERS_PEAKLIST_partnumber	2
RESULTS_SEARCH_3_PARAMETERS_QUANT_TYPE_background_correction	FALSE
RESULTS_SEARCH_3_PARAMETERS_QUANT_TYPE_bias_correction	TRUE
RESULTS_SEARCH_3_PARAMETERS_QUANT_TYPE_keep_extreme_peptides_over_fraction	0
RESULTS_SEARCH_3_PARAMETERS_QUANT_TYPE_low_confidence_check	TRUE
RESULTS_SEARCH_3_PARAMETERS_QUANT_TYPE_low_intensity_check	TRUE
RESULTS_SEARCH_3_PARAMETERS_QUANT_TYPE_median_statistic	TRUE
RESULTS_SEARCH_3_PARAMETERS_QUANT_TYPE_mod_check	TRUE
RESULTS_SEARCH_3_PARAMETERS_QUANT_TYPE_quant_threshold	-1
RESULTS_SEARCH_3_PARAMETERS_QUANT_TYPE_quant_threshold_sn	9
RESULTS_SEARCH_3_PARAMETERS_QUANT_TYPE_separate_searches	FALSE
RESULTS_SEARCH_3_PARAMETERS_QUANT_TYPE_shared_msms_check	TRUE
RESULTS_SEARCH_3_PARAMETERS_PARAGON_METHOD_SETTINGS_UI_SAMPLE_TYPE	Identification
RESULTS_SEARCH_3_PARAMETERS_PARAGON_METHOD_SETTINGS_UI_CYS_ALKYLATION	Iodoacetamide w other Cys mods possible
RESULTS_SEARCH_3_PARAMETERS_PARAGON_METHOD_SETTINGS_UI_DIGESTION	Trypsin + Lys C
RESULTS_SEARCH_3_PARAMETERS_PARAGON_METHOD_SETTINGS_UI_SPECIAL_FACTOR	Gel-based ID
RESULTS_SEARCH_3_PARAMETERS_PARAGON_METHOD_SETTINGS_UI_INSTRUMENT	TripleTOF 6600
RESULTS_SEARCH_3_PARAMETERS_PARAGON_METHOD_SETTINGS_UI_SEARCH_EFFORT	Thorough
RESULTS_SEARCH_3_PARAMETERS_PARAGON_METHOD_SETTINGS_UI_USER_NAME	IMB-MASS02\massuser
RESULTS_SEARCH_3_PARAMETERS_PARAGON_METHOD_SETTINGS_UI_MACHINE_NAME	IMB-MASS02
RESULTS_SEARCH_3_PARAMETERS_PARAGON_METHOD_SETTINGS_UI_SEARCH_ID	6.37467e+17
RESULTS_SEARCH_3_PARAMETERS_PARAGON_METHOD_SETTINGS_UI_START_TIME	2021-01-19 16:12:40
RESULTS_SEARCH_3_PARAMETERS_PARAGON_METHOD_SETTINGS_UI_MIN_UNUSED_PROTSCORE	0.0458
RESULTS_SEARCH_3_PARAMETERS_PARAGON_METHOD_SETTINGS_UI_PSPEP	TRUE
RESULTS_SEARCH_4_time_cpu	281784
RESULTS_SEARCH_4_time_duration	281840
RESULTS_SEARCH_4_version	5.0.1.4874
RESULTS_SEARCH_4_xml:id	SEARCH:2:637466695384099484_1
RESULTS_SEARCH_4_PARAMETERS_chemical_data_edited	FALSE
RESULTS_SEARCH_4_PARAMETERS_do_multiprecursor_search	TRUE
RESULTS_SEARCH_4_PARAMETERS_do_reverse_search	TRUE
RESULTS_SEARCH_4_PARAMETERS_max_quant_labels	35
RESULTS_SEARCH_4_PARAMETERS_maxresults	15
RESULTS_SEARCH_4_PARAMETERS_separate_searches	FALSE
RESULTS_SEARCH_4_PARAMETERS_MSTOLERANCE_type	dalton
RESULTS_SEARCH_4_PARAMETERS_MSTOLERANCE_value	0.05
RESULTS_SEARCH_4_PARAMETERS_MSMSTOLERANCE_type	dalton
RESULTS_SEARCH_4_PARAMETERS_MSMSTOLERANCE_value	0.1
RESULTS_SEARCH_4_PARAMETERS_MS_STANDARD_DEVIATION_type	dalton
RESULTS_SEARCH_4_PARAMETERS_MS_STANDARD_DEVIATION_value	0.0011
RESULTS_SEARCH_4_PARAMETERS_MSMS_STANDARD_DEVIATION_type	dalton
RESULTS_SEARCH_4_PARAMETERS_MSMS_STANDARD_DEVIATION_value	0.01
RESULTS_SEARCH_4_PARAMETERS_FASTA_filename	C:\AB SCIEX\ProteinPilot Data\SearchDatabases\uniprot-zebrafish_with_Clover.fasta
RESULTS_SEARCH_4_PARAMETERS_AUTO_CALIBRATION_ms	TRUE
RESULTS_SEARCH_4_PARAMETERS_AUTO_CALIBRATION_msexport	FALSE
RESULTS_SEARCH_4_PARAMETERS_AUTO_CALIBRATION_msms	TRUE
RESULTS_SEARCH_4_PARAMETERS_AUTO_CALIBRATION_msmstolsdratio	2.75
RESULTS_SEARCH_4_PARAMETERS_AUTO_CALIBRATION_mstolsdratio	7
RESULTS_SEARCH_4_PARAMETERS_AUTO_CALIBRATION_squareroot	TRUE
RESULTS_SEARCH_4_PARAMETERS_AUTO_CALIBRATION_type	dalton
RESULTS_SEARCH_4_PARAMETERS_AUTO_CALIBRATION_MCP_d_s_s_f	0.0666667
RESULTS_SEARCH_4_PARAMETERS_AUTO_CALIBRATION_MCP_d_s_w_f	3
RESULTS_SEARCH_4_PARAMETERS_AUTO_CALIBRATION_MCP_m_f_r_mbc	200
RESULTS_SEARCH_4_PARAMETERS_AUTO_CALIBRATION_MCP_m_m_c	10
RESULTS_SEARCH_4_PARAMETERS_AUTO_CALIBRATION_MCP_m_m_f_s	0.25
RESULTS_SEARCH_4_PARAMETERS_AUTO_CALIBRATION_MCP_m_m_p_f	0.33
RESULTS_SEARCH_4_PARAMETERS_AUTO_CALIBRATION_MCP_m_m_p_rms_f	1
RESULTS_SEARCH_4_PARAMETERS_AUTO_CALIBRATION_MCP_m_p_t_f	1
RESULTS_SEARCH_4_PARAMETERS_AUTO_CALIBRATION_MCP_m_r_h_n_b	15
RESULTS_SEARCH_4_PARAMETERS_AUTO_CALIBRATION_MCP_m_z_n_s	99
RESULTS_SEARCH_4_PARAMETERS_AUTO_CALIBRATION_MCP_m_z_s_mn_f_r	0.0666667
RESULTS_SEARCH_4_PARAMETERS_AUTO_CALIBRATION_MCP_m_z_s_mx_f_r	0.1
RESULTS_SEARCH_4_PARAMETERS_MAX_PRECURSORS_FRAGLET	5
RESULTS_SEARCH_4_PARAMETERS_MAX_PRECURSORS_TAGLET	1
RESULTS_SEARCH_4_PARAMETERS_PRECURSORS_DR_FRAGLET	10
RESULTS_SEARCH_4_PARAMETERS_PRECURSORS_DR_TAGLET	3
RESULTS_SEARCH_4_PARAMETERS_DEFAULT_CHARGE_STATE_1_charge	2
RESULTS_SEARCH_4_PARAMETERS_DEFAULT_CHARGE_STATE_1_probability	1
RESULTS_SEARCH_4_PARAMETERS_DEFAULT_CHARGE_STATE_2_charge	3
RESULTS_SEARCH_4_PARAMETERS_DEFAULT_CHARGE_STATE_2_probability	1
RESULTS_SEARCH_4_PARAMETERS_DEFAULT_CHARGE_STATE_3_charge	4
RESULTS_SEARCH_4_PARAMETERS_DEFAULT_CHARGE_STATE_3_probability	1
RESULTS_SEARCH_4_PARAMETERS_VERSION	5.0.1.0, 4895
RESULTS_SEARCH_4_PARAMETERS_PARAGON_VERSION	5.0.1.0, 4874
RESULTS_SEARCH_4_PARAMETERS_APPLICATION	ProteinPilot(tm) Software
RESULTS_SEARCH_4_PARAMETERS_PROGROUP_alternativedispositionmaximumfoldprobabilitydrop	100
RESULTS_SEARCH_4_PARAMETERS_PROGROUP_alternativedispositionmaximumfoldscoredrop	2
RESULTS_SEARCH_4_PARAMETERS_PROGROUP_autodiscordantpeptidethreshold	0.3
RESULTS_SEARCH_4_PARAMETERS_PROGROUP_bayesconfidencecalclulation	TRUE
RESULTS_SEARCH_4_PARAMETERS_PROGROUP_calibrateconfidence	TRUE
RESULTS_SEARCH_4_PARAMETERS_PROGROUP_compresspeptides	FALSE
RESULTS_SEARCH_4_PARAMETERS_PROGROUP_confidencepercentthresholdforexcludingothersfromquant	1900-01-15
RESULTS_SEARCH_4_PARAMETERS_PROGROUP_confidencepercentthresholdforincludingselfinquant	15
RESULTS_SEARCH_4_PARAMETERS_PROGROUP_donotstoremspeaklists	FALSE
RESULTS_SEARCH_4_PARAMETERS_PROGROUP_fasta	C:\AB SCIEX\ProteinPilot Data\SearchDatabases\uniprot-zebrafish_with_Clover.fasta
RESULTS_SEARCH_4_PARAMETERS_PROGROUP_featuregroupminpepconf	0.66
RESULTS_SEARCH_4_PARAMETERS_PROGROUP_featuregroupminups	0.47
RESULTS_SEARCH_4_PARAMETERS_PROGROUP_focusingintersection	4
RESULTS_SEARCH_4_PARAMETERS_PROGROUP_focusingminimummatchconfidence	0.1
RESULTS_SEARCH_4_PARAMETERS_PROGROUP_focusingminunusedprotscore	0.1
RESULTS_SEARCH_4_PARAMETERS_PROGROUP_focusingsubsetcutoff	6
RESULTS_SEARCH_4_PARAMETERS_PROGROUP_intersection	1.3
RESULTS_SEARCH_4_PARAMETERS_PROGROUP_minimummatchconfidencecutoff	0.001
RESULTS_SEARCH_4_PARAMETERS_PROGROUP_minunusedprotscore	0.0458
RESULTS_SEARCH_4_PARAMETERS_PROGROUP_subsetcutoff	2
RESULTS_SEARCH_4_PARAMETERS_PROGROUP_unusedprotscorethresholdforexcludingothersfromquant	1.3
RESULTS_SEARCH_4_PARAMETERS_PEAKLIST_count	1971
RESULTS_SEARCH_4_PARAMETERS_PEAKLIST_filenumber	2
RESULTS_SEARCH_4_PARAMETERS_PEAKLIST_original_count	1971
RESULTS_SEARCH_4_PARAMETERS_PEAKLIST_originalfilename	C:\AB SCIEX\ProteinPilot Data\Results\Albert\ZX 20200624 6600\ZX 20200624 C4B Control 2.wiff
RESULTS_SEARCH_4_PARAMETERS_PEAKLIST_partnumber	2
RESULTS_SEARCH_4_PARAMETERS_QUANT_TYPE_background_correction	FALSE
RESULTS_SEARCH_4_PARAMETERS_QUANT_TYPE_bias_correction	TRUE
RESULTS_SEARCH_4_PARAMETERS_QUANT_TYPE_keep_extreme_peptides_over_fraction	0
RESULTS_SEARCH_4_PARAMETERS_QUANT_TYPE_low_confidence_check	TRUE
RESULTS_SEARCH_4_PARAMETERS_QUANT_TYPE_low_intensity_check	TRUE
RESULTS_SEARCH_4_PARAMETERS_QUANT_TYPE_median_statistic	TRUE
RESULTS_SEARCH_4_PARAMETERS_QUANT_TYPE_mod_check	TRUE
RESULTS_SEARCH_4_PARAMETERS_QUANT_TYPE_quant_threshold	-1
RESULTS_SEARCH_4_PARAMETERS_QUANT_TYPE_quant_threshold_sn	9
RESULTS_SEARCH_4_PARAMETERS_QUANT_TYPE_separate_searches	FALSE
RESULTS_SEARCH_4_PARAMETERS_QUANT_TYPE_shared_msms_check	TRUE
RESULTS_SEARCH_4_PARAMETERS_PARAGON_METHOD_SETTINGS_UI_SAMPLE_TYPE	Identification
RESULTS_SEARCH_4_PARAMETERS_PARAGON_METHOD_SETTINGS_UI_CYS_ALKYLATION	Iodoacetamide w other Cys mods possible
RESULTS_SEARCH_4_PARAMETERS_PARAGON_METHOD_SETTINGS_UI_DIGESTION	Trypsin + Lys C
RESULTS_SEARCH_4_PARAMETERS_PARAGON_METHOD_SETTINGS_UI_SPECIAL_FACTOR	Gel-based ID
RESULTS_SEARCH_4_PARAMETERS_PARAGON_METHOD_SETTINGS_UI_INSTRUMENT	TripleTOF 6600
RESULTS_SEARCH_4_PARAMETERS_PARAGON_METHOD_SETTINGS_UI_SEARCH_EFFORT	Thorough
RESULTS_SEARCH_4_PARAMETERS_PARAGON_METHOD_SETTINGS_UI_USER_NAME	IMB-MASS02\massuser
RESULTS_SEARCH_4_PARAMETERS_PARAGON_METHOD_SETTINGS_UI_MACHINE_NAME	IMB-MASS02
RESULTS_SEARCH_4_PARAMETERS_PARAGON_METHOD_SETTINGS_UI_SEARCH_ID	6.37467e+17
RESULTS_SEARCH_4_PARAMETERS_PARAGON_METHOD_SETTINGS_UI_START_TIME	2021-01-19 16:12:40
RESULTS_SEARCH_4_PARAMETERS_PARAGON_METHOD_SETTINGS_UI_MIN_UNUSED_PROTSCORE	0.0458
RESULTS_SEARCH_4_PARAMETERS_PARAGON_METHOD_SETTINGS_UI_PSPEP	TRUE
RESULTS_SEARCH_5_time_cpu	129886
RESULTS_SEARCH_5_time_duration	131684
RESULTS_SEARCH_5_version	5.0.1.4874
RESULTS_SEARCH_5_xml:id	SEARCH:1:637466695384099484_2
RESULTS_SEARCH_5_PARAMETERS_chemical_data_edited	FALSE
RESULTS_SEARCH_5_PARAMETERS_do_multiprecursor_search	TRUE
RESULTS_SEARCH_5_PARAMETERS_do_reverse_search	TRUE
RESULTS_SEARCH_5_PARAMETERS_max_quant_labels	35
RESULTS_SEARCH_5_PARAMETERS_maxresults	15
RESULTS_SEARCH_5_PARAMETERS_separate_searches	FALSE
RESULTS_SEARCH_5_PARAMETERS_MSTOLERANCE_type	dalton
RESULTS_SEARCH_5_PARAMETERS_MSTOLERANCE_value	0.05
RESULTS_SEARCH_5_PARAMETERS_MSMSTOLERANCE_type	dalton
RESULTS_SEARCH_5_PARAMETERS_MSMSTOLERANCE_value	0.1
RESULTS_SEARCH_5_PARAMETERS_MS_STANDARD_DEVIATION_type	dalton
RESULTS_SEARCH_5_PARAMETERS_MS_STANDARD_DEVIATION_value	0.0011
RESULTS_SEARCH_5_PARAMETERS_MSMS_STANDARD_DEVIATION_type	dalton
RESULTS_SEARCH_5_PARAMETERS_MSMS_STANDARD_DEVIATION_value	0.01
RESULTS_SEARCH_5_PARAMETERS_FASTA_filename	C:\AB SCIEX\ProteinPilot Data\SearchDatabases\uniprot-zebrafish_with_Clover.fasta
RESULTS_SEARCH_5_PARAMETERS_AUTO_CALIBRATION_ms	TRUE
RESULTS_SEARCH_5_PARAMETERS_AUTO_CALIBRATION_msexport	FALSE
RESULTS_SEARCH_5_PARAMETERS_AUTO_CALIBRATION_msms	TRUE
RESULTS_SEARCH_5_PARAMETERS_AUTO_CALIBRATION_msmstolsdratio	2.75
RESULTS_SEARCH_5_PARAMETERS_AUTO_CALIBRATION_mstolsdratio	7
RESULTS_SEARCH_5_PARAMETERS_AUTO_CALIBRATION_squareroot	TRUE
RESULTS_SEARCH_5_PARAMETERS_AUTO_CALIBRATION_type	dalton
RESULTS_SEARCH_5_PARAMETERS_AUTO_CALIBRATION_MCP_d_s_s_f	0.0666667
RESULTS_SEARCH_5_PARAMETERS_AUTO_CALIBRATION_MCP_d_s_w_f	3
RESULTS_SEARCH_5_PARAMETERS_AUTO_CALIBRATION_MCP_m_f_r_mbc	200
RESULTS_SEARCH_5_PARAMETERS_AUTO_CALIBRATION_MCP_m_m_c	10
RESULTS_SEARCH_5_PARAMETERS_AUTO_CALIBRATION_MCP_m_m_f_s	0.25
RESULTS_SEARCH_5_PARAMETERS_AUTO_CALIBRATION_MCP_m_m_p_f	0.33
RESULTS_SEARCH_5_PARAMETERS_AUTO_CALIBRATION_MCP_m_m_p_rms_f	1
RESULTS_SEARCH_5_PARAMETERS_AUTO_CALIBRATION_MCP_m_p_t_f	1
RESULTS_SEARCH_5_PARAMETERS_AUTO_CALIBRATION_MCP_m_r_h_n_b	15
RESULTS_SEARCH_5_PARAMETERS_AUTO_CALIBRATION_MCP_m_z_n_s	99
RESULTS_SEARCH_5_PARAMETERS_AUTO_CALIBRATION_MCP_m_z_s_mn_f_r	0.0666667
RESULTS_SEARCH_5_PARAMETERS_AUTO_CALIBRATION_MCP_m_z_s_mx_f_r	0.1
RESULTS_SEARCH_5_PARAMETERS_MS_AUTO_CALIBRATION_OUT_avres	-2.83874e-10
RESULTS_SEARCH_5_PARAMETERS_MS_AUTO_CALIBRATION_OUT_c0	2.01596e-05
RESULTS_SEARCH_5_PARAMETERS_MS_AUTO_CALIBRATION_OUT_c1minus1	-1.87849e-06
RESULTS_SEARCH_5_PARAMETERS_MS_AUTO_CALIBRATION_OUT_c2	0
RESULTS_SEARCH_5_PARAMETERS_MS_AUTO_CALIBRATION_OUT_file	3
RESULTS_SEARCH_5_PARAMETERS_MS_AUTO_CALIBRATION_OUT_partnumber	3
RESULTS_SEARCH_5_PARAMETERS_MS_AUTO_CALIBRATION_OUT_polyorder	1
RESULTS_SEARCH_5_PARAMETERS_MS_AUTO_CALIBRATION_OUT_sample	1
RESULTS_SEARCH_5_PARAMETERS_MS_AUTO_CALIBRATION_OUT_squareroot	TRUE
RESULTS_SEARCH_5_PARAMETERS_MSMS_AUTO_CALIBRATION_OUT_avres	2.0098e-08
RESULTS_SEARCH_5_PARAMETERS_MSMS_AUTO_CALIBRATION_OUT_c0	-6.95854e-06
RESULTS_SEARCH_5_PARAMETERS_MSMS_AUTO_CALIBRATION_OUT_c1minus1	1.35239e-07
RESULTS_SEARCH_5_PARAMETERS_MSMS_AUTO_CALIBRATION_OUT_c2	0
RESULTS_SEARCH_5_PARAMETERS_MSMS_AUTO_CALIBRATION_OUT_file	3
RESULTS_SEARCH_5_PARAMETERS_MSMS_AUTO_CALIBRATION_OUT_partnumber	3
RESULTS_SEARCH_5_PARAMETERS_MSMS_AUTO_CALIBRATION_OUT_polyorder	1
RESULTS_SEARCH_5_PARAMETERS_MSMS_AUTO_CALIBRATION_OUT_sample	1
RESULTS_SEARCH_5_PARAMETERS_MSMS_AUTO_CALIBRATION_OUT_squareroot	TRUE
RESULTS_SEARCH_5_PARAMETERS_MAX_PRECURSORS_FRAGLET	5
RESULTS_SEARCH_5_PARAMETERS_MAX_PRECURSORS_TAGLET	1
RESULTS_SEARCH_5_PARAMETERS_PRECURSORS_DR_FRAGLET	10
RESULTS_SEARCH_5_PARAMETERS_PRECURSORS_DR_TAGLET	3
RESULTS_SEARCH_5_PARAMETERS_DEFAULT_CHARGE_STATE_1_charge	2
RESULTS_SEARCH_5_PARAMETERS_DEFAULT_CHARGE_STATE_1_probability	1900-01-01
RESULTS_SEARCH_5_PARAMETERS_DEFAULT_CHARGE_STATE_2_charge	3
RESULTS_SEARCH_5_PARAMETERS_DEFAULT_CHARGE_STATE_2_probability	1
RESULTS_SEARCH_5_PARAMETERS_DEFAULT_CHARGE_STATE_3_charge	4
RESULTS_SEARCH_5_PARAMETERS_DEFAULT_CHARGE_STATE_3_probability	1900-01-01
RESULTS_SEARCH_5_PARAMETERS_VERSION	5.0.1.0, 4895
RESULTS_SEARCH_5_PARAMETERS_PARAGON_VERSION	5.0.1.0, 4874
RESULTS_SEARCH_5_PARAMETERS_APPLICATION	ProteinPilot(tm) Software
RESULTS_SEARCH_5_PARAMETERS_PROGROUP_alternativedispositionmaximumfoldprobabilitydrop	100
RESULTS_SEARCH_5_PARAMETERS_PROGROUP_alternativedispositionmaximumfoldscoredrop	2
RESULTS_SEARCH_5_PARAMETERS_PROGROUP_autodiscordantpeptidethreshold	0.3
RESULTS_SEARCH_5_PARAMETERS_PROGROUP_bayesconfidencecalclulation	TRUE
RESULTS_SEARCH_5_PARAMETERS_PROGROUP_calibrateconfidence	TRUE
RESULTS_SEARCH_5_PARAMETERS_PROGROUP_compresspeptides	FALSE
RESULTS_SEARCH_5_PARAMETERS_PROGROUP_confidencepercentthresholdforexcludingothersfromquant	15
RESULTS_SEARCH_5_PARAMETERS_PROGROUP_confidencepercentthresholdforincludingselfinquant	15
RESULTS_SEARCH_5_PARAMETERS_PROGROUP_donotstoremspeaklists	FALSE
RESULTS_SEARCH_5_PARAMETERS_PROGROUP_fasta	C:\AB SCIEX\ProteinPilot Data\SearchDatabases\uniprot-zebrafish_with_Clover.fasta
RESULTS_SEARCH_5_PARAMETERS_PROGROUP_featuregroupminpepconf	0.66
RESULTS_SEARCH_5_PARAMETERS_PROGROUP_featuregroupminups	0.47
RESULTS_SEARCH_5_PARAMETERS_PROGROUP_focusingintersection	4
RESULTS_SEARCH_5_PARAMETERS_PROGROUP_focusingminimummatchconfidence	0.1
RESULTS_SEARCH_5_PARAMETERS_PROGROUP_focusingminunusedprotscore	0.1
RESULTS_SEARCH_5_PARAMETERS_PROGROUP_focusingsubsetcutoff	6
RESULTS_SEARCH_5_PARAMETERS_PROGROUP_intersection	1.3
RESULTS_SEARCH_5_PARAMETERS_PROGROUP_minimummatchconfidencecutoff	0.001
RESULTS_SEARCH_5_PARAMETERS_PROGROUP_minunusedprotscore	0.0458
RESULTS_SEARCH_5_PARAMETERS_PROGROUP_subsetcutoff	2
RESULTS_SEARCH_5_PARAMETERS_PROGROUP_unusedprotscorethresholdforexcludingothersfromquant	1900-01-01 07:12:00
RESULTS_SEARCH_5_PARAMETERS_PEAKLIST_count	2899
RESULTS_SEARCH_5_PARAMETERS_PEAKLIST_filenumber	3
RESULTS_SEARCH_5_PARAMETERS_PEAKLIST_original_count	2899
RESULTS_SEARCH_5_PARAMETERS_PEAKLIST_originalfilename	C:\AB SCIEX\ProteinPilot Data\Results\Albert\ZX 20200624 6600\ZX 20200624 C4B Control 3.wiff
RESULTS_SEARCH_5_PARAMETERS_PEAKLIST_partnumber	3
RESULTS_SEARCH_5_PARAMETERS_QUANT_TYPE_background_correction	FALSE
RESULTS_SEARCH_5_PARAMETERS_QUANT_TYPE_bias_correction	TRUE
RESULTS_SEARCH_5_PARAMETERS_QUANT_TYPE_keep_extreme_peptides_over_fraction	0
RESULTS_SEARCH_5_PARAMETERS_QUANT_TYPE_low_confidence_check	TRUE
RESULTS_SEARCH_5_PARAMETERS_QUANT_TYPE_low_intensity_check	TRUE
RESULTS_SEARCH_5_PARAMETERS_QUANT_TYPE_median_statistic	TRUE
RESULTS_SEARCH_5_PARAMETERS_QUANT_TYPE_mod_check	TRUE
RESULTS_SEARCH_5_PARAMETERS_QUANT_TYPE_quant_threshold	-1
RESULTS_SEARCH_5_PARAMETERS_QUANT_TYPE_quant_threshold_sn	9
RESULTS_SEARCH_5_PARAMETERS_QUANT_TYPE_separate_searches	FALSE
RESULTS_SEARCH_5_PARAMETERS_QUANT_TYPE_shared_msms_check	TRUE
RESULTS_SEARCH_5_PARAMETERS_PARAGON_METHOD_SETTINGS_UI_SAMPLE_TYPE	Identification
RESULTS_SEARCH_5_PARAMETERS_PARAGON_METHOD_SETTINGS_UI_CYS_ALKYLATION	Iodoacetamide w other Cys mods possible
RESULTS_SEARCH_5_PARAMETERS_PARAGON_METHOD_SETTINGS_UI_DIGESTION	Trypsin + Lys C
RESULTS_SEARCH_5_PARAMETERS_PARAGON_METHOD_SETTINGS_UI_SPECIAL_FACTOR	Gel-based ID
RESULTS_SEARCH_5_PARAMETERS_PARAGON_METHOD_SETTINGS_UI_INSTRUMENT	TripleTOF 6600
RESULTS_SEARCH_5_PARAMETERS_PARAGON_METHOD_SETTINGS_UI_SEARCH_EFFORT	Thorough
RESULTS_SEARCH_5_PARAMETERS_PARAGON_METHOD_SETTINGS_UI_USER_NAME	IMB-MASS02\massuser
RESULTS_SEARCH_5_PARAMETERS_PARAGON_METHOD_SETTINGS_UI_MACHINE_NAME	IMB-MASS02
RESULTS_SEARCH_5_PARAMETERS_PARAGON_METHOD_SETTINGS_UI_SEARCH_ID	6.37467e+17
RESULTS_SEARCH_5_PARAMETERS_PARAGON_METHOD_SETTINGS_UI_START_TIME	2021-01-19 16:12:40
RESULTS_SEARCH_5_PARAMETERS_PARAGON_METHOD_SETTINGS_UI_MIN_UNUSED_PROTSCORE	0.0458
RESULTS_SEARCH_5_PARAMETERS_PARAGON_METHOD_SETTINGS_UI_PSPEP	TRUE
RESULTS_SEARCH_6_time_cpu	272689
RESULTS_SEARCH_6_time_duration	272760
RESULTS_SEARCH_6_version	5.0.1.4874
RESULTS_SEARCH_6_xml:id	SEARCH:2:637466695384099484_2
RESULTS_SEARCH_6_PARAMETERS_chemical_data_edited	FALSE
RESULTS_SEARCH_6_PARAMETERS_do_multiprecursor_search	TRUE
RESULTS_SEARCH_6_PARAMETERS_do_reverse_search	TRUE
RESULTS_SEARCH_6_PARAMETERS_max_quant_labels	35
RESULTS_SEARCH_6_PARAMETERS_maxresults	15
RESULTS_SEARCH_6_PARAMETERS_separate_searches	FALSE
RESULTS_SEARCH_6_PARAMETERS_MSTOLERANCE_type	dalton
RESULTS_SEARCH_6_PARAMETERS_MSTOLERANCE_value	0.05
RESULTS_SEARCH_6_PARAMETERS_MSMSTOLERANCE_type	dalton
RESULTS_SEARCH_6_PARAMETERS_MSMSTOLERANCE_value	0.1
RESULTS_SEARCH_6_PARAMETERS_MS_STANDARD_DEVIATION_type	dalton
RESULTS_SEARCH_6_PARAMETERS_MS_STANDARD_DEVIATION_value	0.0011
RESULTS_SEARCH_6_PARAMETERS_MSMS_STANDARD_DEVIATION_type	dalton
RESULTS_SEARCH_6_PARAMETERS_MSMS_STANDARD_DEVIATION_value	0.01
RESULTS_SEARCH_6_PARAMETERS_FASTA_filename	C:\AB SCIEX\ProteinPilot Data\SearchDatabases\uniprot-zebrafish_with_Clover.fasta
RESULTS_SEARCH_6_PARAMETERS_AUTO_CALIBRATION_ms	TRUE
RESULTS_SEARCH_6_PARAMETERS_AUTO_CALIBRATION_msexport	FALSE
RESULTS_SEARCH_6_PARAMETERS_AUTO_CALIBRATION_msms	TRUE
RESULTS_SEARCH_6_PARAMETERS_AUTO_CALIBRATION_msmstolsdratio	2.75
RESULTS_SEARCH_6_PARAMETERS_AUTO_CALIBRATION_mstolsdratio	7
RESULTS_SEARCH_6_PARAMETERS_AUTO_CALIBRATION_squareroot	TRUE
RESULTS_SEARCH_6_PARAMETERS_AUTO_CALIBRATION_type	dalton
RESULTS_SEARCH_6_PARAMETERS_AUTO_CALIBRATION_MCP_d_s_s_f	0.0666667
RESULTS_SEARCH_6_PARAMETERS_AUTO_CALIBRATION_MCP_d_s_w_f	3
RESULTS_SEARCH_6_PARAMETERS_AUTO_CALIBRATION_MCP_m_f_r_mbc	200
RESULTS_SEARCH_6_PARAMETERS_AUTO_CALIBRATION_MCP_m_m_c	10
RESULTS_SEARCH_6_PARAMETERS_AUTO_CALIBRATION_MCP_m_m_f_s	0.25
RESULTS_SEARCH_6_PARAMETERS_AUTO_CALIBRATION_MCP_m_m_p_f	0.33
RESULTS_SEARCH_6_PARAMETERS_AUTO_CALIBRATION_MCP_m_m_p_rms_f	1
RESULTS_SEARCH_6_PARAMETERS_AUTO_CALIBRATION_MCP_m_p_t_f	1
RESULTS_SEARCH_6_PARAMETERS_AUTO_CALIBRATION_MCP_m_r_h_n_b	15
RESULTS_SEARCH_6_PARAMETERS_AUTO_CALIBRATION_MCP_m_z_n_s	99
RESULTS_SEARCH_6_PARAMETERS_AUTO_CALIBRATION_MCP_m_z_s_mn_f_r	0.0666667
RESULTS_SEARCH_6_PARAMETERS_AUTO_CALIBRATION_MCP_m_z_s_mx_f_r	0.1
RESULTS_SEARCH_6_PARAMETERS_MS_AUTO_CALIBRATION_OUT_avres	-2.83874e-10
RESULTS_SEARCH_6_PARAMETERS_MS_AUTO_CALIBRATION_OUT_c0	2.01596e-05
RESULTS_SEARCH_6_PARAMETERS_MS_AUTO_CALIBRATION_OUT_c1minus1	-1.87849e-06
RESULTS_SEARCH_6_PARAMETERS_MS_AUTO_CALIBRATION_OUT_c2	0
RESULTS_SEARCH_6_PARAMETERS_MS_AUTO_CALIBRATION_OUT_file	3
RESULTS_SEARCH_6_PARAMETERS_MS_AUTO_CALIBRATION_OUT_partnumber	3
RESULTS_SEARCH_6_PARAMETERS_MS_AUTO_CALIBRATION_OUT_polyorder	1
RESULTS_SEARCH_6_PARAMETERS_MS_AUTO_CALIBRATION_OUT_sample	1
RESULTS_SEARCH_6_PARAMETERS_MS_AUTO_CALIBRATION_OUT_squareroot	TRUE
RESULTS_SEARCH_6_PARAMETERS_MSMS_AUTO_CALIBRATION_OUT_avres	2.0098e-08
RESULTS_SEARCH_6_PARAMETERS_MSMS_AUTO_CALIBRATION_OUT_c0	-6.95854e-06
RESULTS_SEARCH_6_PARAMETERS_MSMS_AUTO_CALIBRATION_OUT_c1minus1	1.35239e-07
RESULTS_SEARCH_6_PARAMETERS_MSMS_AUTO_CALIBRATION_OUT_c2	0
RESULTS_SEARCH_6_PARAMETERS_MSMS_AUTO_CALIBRATION_OUT_file	3
RESULTS_SEARCH_6_PARAMETERS_MSMS_AUTO_CALIBRATION_OUT_partnumber	3
RESULTS_SEARCH_6_PARAMETERS_MSMS_AUTO_CALIBRATION_OUT_polyorder	1
RESULTS_SEARCH_6_PARAMETERS_MSMS_AUTO_CALIBRATION_OUT_sample	1
RESULTS_SEARCH_6_PARAMETERS_MSMS_AUTO_CALIBRATION_OUT_squareroot	TRUE
RESULTS_SEARCH_6_PARAMETERS_MAX_PRECURSORS_FRAGLET	5
RESULTS_SEARCH_6_PARAMETERS_MAX_PRECURSORS_TAGLET	1
RESULTS_SEARCH_6_PARAMETERS_PRECURSORS_DR_FRAGLET	10
RESULTS_SEARCH_6_PARAMETERS_PRECURSORS_DR_TAGLET	3
RESULTS_SEARCH_6_PARAMETERS_DEFAULT_CHARGE_STATE_1_charge	2
RESULTS_SEARCH_6_PARAMETERS_DEFAULT_CHARGE_STATE_1_probability	1
RESULTS_SEARCH_6_PARAMETERS_DEFAULT_CHARGE_STATE_2_charge	3
RESULTS_SEARCH_6_PARAMETERS_DEFAULT_CHARGE_STATE_2_probability	1
RESULTS_SEARCH_6_PARAMETERS_DEFAULT_CHARGE_STATE_3_charge	4
RESULTS_SEARCH_6_PARAMETERS_DEFAULT_CHARGE_STATE_3_probability	1
RESULTS_SEARCH_6_PARAMETERS_VERSION	5.0.1.0, 4895
RESULTS_SEARCH_6_PARAMETERS_PARAGON_VERSION	5.0.1.0, 4874
RESULTS_SEARCH_6_PARAMETERS_APPLICATION	ProteinPilot(tm) Software
RESULTS_SEARCH_6_PARAMETERS_PROGROUP_alternativedispositionmaximumfoldprobabilitydrop	100
RESULTS_SEARCH_6_PARAMETERS_PROGROUP_alternativedispositionmaximumfoldscoredrop	2
RESULTS_SEARCH_6_PARAMETERS_PROGROUP_autodiscordantpeptidethreshold	0.3
RESULTS_SEARCH_6_PARAMETERS_PROGROUP_bayesconfidencecalclulation	TRUE
RESULTS_SEARCH_6_PARAMETERS_PROGROUP_calibrateconfidence	TRUE
RESULTS_SEARCH_6_PARAMETERS_PROGROUP_compresspeptides	FALSE
RESULTS_SEARCH_6_PARAMETERS_PROGROUP_confidencepercentthresholdforexcludingothersfromquant	15
RESULTS_SEARCH_6_PARAMETERS_PROGROUP_confidencepercentthresholdforincludingselfinquant	15
RESULTS_SEARCH_6_PARAMETERS_PROGROUP_donotstoremspeaklists	FALSE
RESULTS_SEARCH_6_PARAMETERS_PROGROUP_fasta	C:\AB SCIEX\ProteinPilot Data\SearchDatabases\uniprot-zebrafish_with_Clover.fasta
RESULTS_SEARCH_6_PARAMETERS_PROGROUP_featuregroupminpepconf	0.66
RESULTS_SEARCH_6_PARAMETERS_PROGROUP_featuregroupminups	0.47
RESULTS_SEARCH_6_PARAMETERS_PROGROUP_focusingintersection	4
RESULTS_SEARCH_6_PARAMETERS_PROGROUP_focusingminimummatchconfidence	0.1
RESULTS_SEARCH_6_PARAMETERS_PROGROUP_focusingminunusedprotscore	0.1
RESULTS_SEARCH_6_PARAMETERS_PROGROUP_focusingsubsetcutoff	6
RESULTS_SEARCH_6_PARAMETERS_PROGROUP_intersection	1.3
RESULTS_SEARCH_6_PARAMETERS_PROGROUP_minimummatchconfidencecutoff	0.001
RESULTS_SEARCH_6_PARAMETERS_PROGROUP_minunusedprotscore	0.0458
RESULTS_SEARCH_6_PARAMETERS_PROGROUP_subsetcutoff	2
RESULTS_SEARCH_6_PARAMETERS_PROGROUP_unusedprotscorethresholdforexcludingothersfromquant	1.3
RESULTS_SEARCH_6_PARAMETERS_PEAKLIST_count	2899
RESULTS_SEARCH_6_PARAMETERS_PEAKLIST_filenumber	3
RESULTS_SEARCH_6_PARAMETERS_PEAKLIST_original_count	2899
RESULTS_SEARCH_6_PARAMETERS_PEAKLIST_originalfilename	C:\AB SCIEX\ProteinPilot Data\Results\Albert\ZX 20200624 6600\ZX 20200624 C4B Control 3.wiff
RESULTS_SEARCH_6_PARAMETERS_PEAKLIST_partnumber	3
RESULTS_SEARCH_6_PARAMETERS_QUANT_TYPE_background_correction	FALSE
RESULTS_SEARCH_6_PARAMETERS_QUANT_TYPE_bias_correction	TRUE
RESULTS_SEARCH_6_PARAMETERS_QUANT_TYPE_keep_extreme_peptides_over_fraction	00:00:00
RESULTS_SEARCH_6_PARAMETERS_QUANT_TYPE_low_confidence_check	TRUE
RESULTS_SEARCH_6_PARAMETERS_QUANT_TYPE_low_intensity_check	TRUE
RESULTS_SEARCH_6_PARAMETERS_QUANT_TYPE_median_statistic	TRUE
RESULTS_SEARCH_6_PARAMETERS_QUANT_TYPE_mod_check	TRUE
RESULTS_SEARCH_6_PARAMETERS_QUANT_TYPE_quant_threshold	-1
RESULTS_SEARCH_6_PARAMETERS_QUANT_TYPE_quant_threshold_sn	9
RESULTS_SEARCH_6_PARAMETERS_QUANT_TYPE_separate_searches	FALSE
RESULTS_SEARCH_6_PARAMETERS_QUANT_TYPE_shared_msms_check	TRUE
RESULTS_SEARCH_6_PARAMETERS_PARAGON_METHOD_SETTINGS_UI_SAMPLE_TYPE	Identification
RESULTS_SEARCH_6_PARAMETERS_PARAGON_METHOD_SETTINGS_UI_CYS_ALKYLATION	Iodoacetamide w other Cys mods possible
RESULTS_SEARCH_6_PARAMETERS_PARAGON_METHOD_SETTINGS_UI_DIGESTION	Trypsin + Lys C
RESULTS_SEARCH_6_PARAMETERS_PARAGON_METHOD_SETTINGS_UI_SPECIAL_FACTOR	Gel-based ID
RESULTS_SEARCH_6_PARAMETERS_PARAGON_METHOD_SETTINGS_UI_INSTRUMENT	TripleTOF 6600
RESULTS_SEARCH_6_PARAMETERS_PARAGON_METHOD_SETTINGS_UI_SEARCH_EFFORT	Thorough
RESULTS_SEARCH_6_PARAMETERS_PARAGON_METHOD_SETTINGS_UI_USER_NAME	IMB-MASS02\massuser
RESULTS_SEARCH_6_PARAMETERS_PARAGON_METHOD_SETTINGS_UI_MACHINE_NAME	IMB-MASS02
RESULTS_SEARCH_6_PARAMETERS_PARAGON_METHOD_SETTINGS_UI_SEARCH_ID	6.37467e+17
RESULTS_SEARCH_6_PARAMETERS_PARAGON_METHOD_SETTINGS_UI_START_TIME	2021-01-19 16:12:40
RESULTS_SEARCH_6_PARAMETERS_PARAGON_METHOD_SETTINGS_UI_MIN_UNUSED_PROTSCORE	0.0458
RESULTS_SEARCH_6_PARAMETERS_PARAGON_METHOD_SETTINGS_UI_PSPEP	TRUE
RESULTS_SEARCH_7_time_cpu	163863
RESULTS_SEARCH_7_time_duration	167612
RESULTS_SEARCH_7_version	5.0.1.4874
RESULTS_SEARCH_7_xml:id	SEARCH:1:637466695384099484_3
RESULTS_SEARCH_7_PARAMETERS_chemical_data_edited	FALSE
RESULTS_SEARCH_7_PARAMETERS_do_multiprecursor_search	TRUE
RESULTS_SEARCH_7_PARAMETERS_do_reverse_search	TRUE
RESULTS_SEARCH_7_PARAMETERS_max_quant_labels	35
RESULTS_SEARCH_7_PARAMETERS_maxresults	15
RESULTS_SEARCH_7_PARAMETERS_separate_searches	FALSE
RESULTS_SEARCH_7_PARAMETERS_MSTOLERANCE_type	dalton
RESULTS_SEARCH_7_PARAMETERS_MSTOLERANCE_value	0.05
RESULTS_SEARCH_7_PARAMETERS_MSMSTOLERANCE_type	dalton
RESULTS_SEARCH_7_PARAMETERS_MSMSTOLERANCE_value	0.1
RESULTS_SEARCH_7_PARAMETERS_MS_STANDARD_DEVIATION_type	dalton
RESULTS_SEARCH_7_PARAMETERS_MS_STANDARD_DEVIATION_value	0.0011
RESULTS_SEARCH_7_PARAMETERS_MSMS_STANDARD_DEVIATION_type	dalton
RESULTS_SEARCH_7_PARAMETERS_MSMS_STANDARD_DEVIATION_value	0.01
RESULTS_SEARCH_7_PARAMETERS_FASTA_filename	C:\AB SCIEX\ProteinPilot Data\SearchDatabases\uniprot-zebrafish_with_Clover.fasta
RESULTS_SEARCH_7_PARAMETERS_AUTO_CALIBRATION_ms	TRUE
RESULTS_SEARCH_7_PARAMETERS_AUTO_CALIBRATION_msexport	FALSE
RESULTS_SEARCH_7_PARAMETERS_AUTO_CALIBRATION_msms	TRUE
RESULTS_SEARCH_7_PARAMETERS_AUTO_CALIBRATION_msmstolsdratio	2.75
RESULTS_SEARCH_7_PARAMETERS_AUTO_CALIBRATION_mstolsdratio	7
RESULTS_SEARCH_7_PARAMETERS_AUTO_CALIBRATION_squareroot	TRUE
RESULTS_SEARCH_7_PARAMETERS_AUTO_CALIBRATION_type	dalton
RESULTS_SEARCH_7_PARAMETERS_AUTO_CALIBRATION_MCP_d_s_s_f	0.0666667
RESULTS_SEARCH_7_PARAMETERS_AUTO_CALIBRATION_MCP_d_s_w_f	3
RESULTS_SEARCH_7_PARAMETERS_AUTO_CALIBRATION_MCP_m_f_r_mbc	200
RESULTS_SEARCH_7_PARAMETERS_AUTO_CALIBRATION_MCP_m_m_c	10
RESULTS_SEARCH_7_PARAMETERS_AUTO_CALIBRATION_MCP_m_m_f_s	0.25
RESULTS_SEARCH_7_PARAMETERS_AUTO_CALIBRATION_MCP_m_m_p_f	0.33
RESULTS_SEARCH_7_PARAMETERS_AUTO_CALIBRATION_MCP_m_m_p_rms_f	1
RESULTS_SEARCH_7_PARAMETERS_AUTO_CALIBRATION_MCP_m_p_t_f	1
RESULTS_SEARCH_7_PARAMETERS_AUTO_CALIBRATION_MCP_m_r_h_n_b	15
RESULTS_SEARCH_7_PARAMETERS_AUTO_CALIBRATION_MCP_m_z_n_s	99
RESULTS_SEARCH_7_PARAMETERS_AUTO_CALIBRATION_MCP_m_z_s_mn_f_r	0.0666667
RESULTS_SEARCH_7_PARAMETERS_AUTO_CALIBRATION_MCP_m_z_s_mx_f_r	0.1
RESULTS_SEARCH_7_PARAMETERS_MS_AUTO_CALIBRATION_OUT_avres	-2.4691e-10
RESULTS_SEARCH_7_PARAMETERS_MS_AUTO_CALIBRATION_OUT_c0	-9.44066e-07
RESULTS_SEARCH_7_PARAMETERS_MS_AUTO_CALIBRATION_OUT_c1minus1	-6.62854e-07
RESULTS_SEARCH_7_PARAMETERS_MS_AUTO_CALIBRATION_OUT_c2	0
RESULTS_SEARCH_7_PARAMETERS_MS_AUTO_CALIBRATION_OUT_file	3
RESULTS_SEARCH_7_PARAMETERS_MS_AUTO_CALIBRATION_OUT_partnumber	4
RESULTS_SEARCH_7_PARAMETERS_MS_AUTO_CALIBRATION_OUT_polyorder	1
RESULTS_SEARCH_7_PARAMETERS_MS_AUTO_CALIBRATION_OUT_sample	1
RESULTS_SEARCH_7_PARAMETERS_MS_AUTO_CALIBRATION_OUT_squareroot	TRUE
RESULTS_SEARCH_7_PARAMETERS_MSMS_AUTO_CALIBRATION_OUT_avres	-7.24573e-08
RESULTS_SEARCH_7_PARAMETERS_MSMS_AUTO_CALIBRATION_OUT_c0	-2.98938e-05
RESULTS_SEARCH_7_PARAMETERS_MSMS_AUTO_CALIBRATION_OUT_c1minus1	9.58416e-07
RESULTS_SEARCH_7_PARAMETERS_MSMS_AUTO_CALIBRATION_OUT_c2	0
RESULTS_SEARCH_7_PARAMETERS_MSMS_AUTO_CALIBRATION_OUT_file	3
RESULTS_SEARCH_7_PARAMETERS_MSMS_AUTO_CALIBRATION_OUT_partnumber	4
RESULTS_SEARCH_7_PARAMETERS_MSMS_AUTO_CALIBRATION_OUT_polyorder	1
RESULTS_SEARCH_7_PARAMETERS_MSMS_AUTO_CALIBRATION_OUT_sample	1
RESULTS_SEARCH_7_PARAMETERS_MSMS_AUTO_CALIBRATION_OUT_squareroot	TRUE
RESULTS_SEARCH_7_PARAMETERS_MAX_PRECURSORS_FRAGLET	5
RESULTS_SEARCH_7_PARAMETERS_MAX_PRECURSORS_TAGLET	1
RESULTS_SEARCH_7_PARAMETERS_PRECURSORS_DR_FRAGLET	10
RESULTS_SEARCH_7_PARAMETERS_PRECURSORS_DR_TAGLET	3
RESULTS_SEARCH_7_PARAMETERS_DEFAULT_CHARGE_STATE_1_charge	2
RESULTS_SEARCH_7_PARAMETERS_DEFAULT_CHARGE_STATE_1_probability	1
RESULTS_SEARCH_7_PARAMETERS_DEFAULT_CHARGE_STATE_2_charge	3
RESULTS_SEARCH_7_PARAMETERS_DEFAULT_CHARGE_STATE_2_probability	1900-01-01
RESULTS_SEARCH_7_PARAMETERS_DEFAULT_CHARGE_STATE_3_charge	1900-01-04
RESULTS_SEARCH_7_PARAMETERS_DEFAULT_CHARGE_STATE_3_probability	1900-01-01
RESULTS_SEARCH_7_PARAMETERS_VERSION	5.0.1.0, 4895
RESULTS_SEARCH_7_PARAMETERS_PARAGON_VERSION	5.0.1.0, 4874
RESULTS_SEARCH_7_PARAMETERS_APPLICATION	ProteinPilot(tm) Software
RESULTS_SEARCH_7_PARAMETERS_PROGROUP_alternativedispositionmaximumfoldprobabilitydrop	100
RESULTS_SEARCH_7_PARAMETERS_PROGROUP_alternativedispositionmaximumfoldscoredrop	2
RESULTS_SEARCH_7_PARAMETERS_PROGROUP_autodiscordantpeptidethreshold	0.3
RESULTS_SEARCH_7_PARAMETERS_PROGROUP_bayesconfidencecalclulation	TRUE
RESULTS_SEARCH_7_PARAMETERS_PROGROUP_calibrateconfidence	TRUE
RESULTS_SEARCH_7_PARAMETERS_PROGROUP_compresspeptides	FALSE
RESULTS_SEARCH_7_PARAMETERS_PROGROUP_confidencepercentthresholdforexcludingothersfromquant	15
RESULTS_SEARCH_7_PARAMETERS_PROGROUP_confidencepercentthresholdforincludingselfinquant	15
RESULTS_SEARCH_7_PARAMETERS_PROGROUP_donotstoremspeaklists	FALSE
RESULTS_SEARCH_7_PARAMETERS_PROGROUP_fasta	C:\AB SCIEX\ProteinPilot Data\SearchDatabases\uniprot-zebrafish_with_Clover.fasta
RESULTS_SEARCH_7_PARAMETERS_PROGROUP_featuregroupminpepconf	0.66
RESULTS_SEARCH_7_PARAMETERS_PROGROUP_featuregroupminups	0.47
RESULTS_SEARCH_7_PARAMETERS_PROGROUP_focusingintersection	4
RESULTS_SEARCH_7_PARAMETERS_PROGROUP_focusingminimummatchconfidence	02:24:00
RESULTS_SEARCH_7_PARAMETERS_PROGROUP_focusingminunusedprotscore	0.1
RESULTS_SEARCH_7_PARAMETERS_PROGROUP_focusingsubsetcutoff	6
RESULTS_SEARCH_7_PARAMETERS_PROGROUP_intersection	1.3
RESULTS_SEARCH_7_PARAMETERS_PROGROUP_minimummatchconfidencecutoff	0.001
RESULTS_SEARCH_7_PARAMETERS_PROGROUP_minunusedprotscore	0.0458
RESULTS_SEARCH_7_PARAMETERS_PROGROUP_subsetcutoff	2
RESULTS_SEARCH_7_PARAMETERS_PROGROUP_unusedprotscorethresholdforexcludingothersfromquant	1.3
RESULTS_SEARCH_7_PARAMETERS_PEAKLIST_count	2901
RESULTS_SEARCH_7_PARAMETERS_PEAKLIST_filenumber	3
RESULTS_SEARCH_7_PARAMETERS_PEAKLIST_original_count	2901
RESULTS_SEARCH_7_PARAMETERS_PEAKLIST_originalfilename	C:\AB SCIEX\ProteinPilot Data\Results\Albert\ZX 20200624 6600\ZX 20200624 C4B Control 3.wiff
RESULTS_SEARCH_7_PARAMETERS_PEAKLIST_partnumber	4
RESULTS_SEARCH_7_PARAMETERS_QUANT_TYPE_background_correction	FALSE
RESULTS_SEARCH_7_PARAMETERS_QUANT_TYPE_bias_correction	TRUE
RESULTS_SEARCH_7_PARAMETERS_QUANT_TYPE_keep_extreme_peptides_over_fraction	0
RESULTS_SEARCH_7_PARAMETERS_QUANT_TYPE_low_confidence_check	TRUE
RESULTS_SEARCH_7_PARAMETERS_QUANT_TYPE_low_intensity_check	TRUE
RESULTS_SEARCH_7_PARAMETERS_QUANT_TYPE_median_statistic	TRUE
RESULTS_SEARCH_7_PARAMETERS_QUANT_TYPE_mod_check	TRUE
RESULTS_SEARCH_7_PARAMETERS_QUANT_TYPE_quant_threshold	-1
RESULTS_SEARCH_7_PARAMETERS_QUANT_TYPE_quant_threshold_sn	9
RESULTS_SEARCH_7_PARAMETERS_QUANT_TYPE_separate_searches	FALSE
RESULTS_SEARCH_7_PARAMETERS_QUANT_TYPE_shared_msms_check	TRUE
RESULTS_SEARCH_7_PARAMETERS_PARAGON_METHOD_SETTINGS_UI_SAMPLE_TYPE	Identification
RESULTS_SEARCH_7_PARAMETERS_PARAGON_METHOD_SETTINGS_UI_CYS_ALKYLATION	Iodoacetamide w other Cys mods possible
RESULTS_SEARCH_7_PARAMETERS_PARAGON_METHOD_SETTINGS_UI_DIGESTION	Trypsin + Lys C
RESULTS_SEARCH_7_PARAMETERS_PARAGON_METHOD_SETTINGS_UI_SPECIAL_FACTOR	Gel-based ID
RESULTS_SEARCH_7_PARAMETERS_PARAGON_METHOD_SETTINGS_UI_INSTRUMENT	TripleTOF 6600
RESULTS_SEARCH_7_PARAMETERS_PARAGON_METHOD_SETTINGS_UI_SEARCH_EFFORT	Thorough
RESULTS_SEARCH_7_PARAMETERS_PARAGON_METHOD_SETTINGS_UI_USER_NAME	IMB-MASS02\massuser
RESULTS_SEARCH_7_PARAMETERS_PARAGON_METHOD_SETTINGS_UI_MACHINE_NAME	IMB-MASS02
RESULTS_SEARCH_7_PARAMETERS_PARAGON_METHOD_SETTINGS_UI_SEARCH_ID	6.37467e+17
RESULTS_SEARCH_7_PARAMETERS_PARAGON_METHOD_SETTINGS_UI_START_TIME	2021-01-19 16:12:40
RESULTS_SEARCH_7_PARAMETERS_PARAGON_METHOD_SETTINGS_UI_MIN_UNUSED_PROTSCORE	0.0458
RESULTS_SEARCH_7_PARAMETERS_PARAGON_METHOD_SETTINGS_UI_PSPEP	TRUE
RESULTS_SEARCH_8_time_cpu	313031
RESULTS_SEARCH_8_time_duration	313182
RESULTS_SEARCH_8_version	5.0.1.4874
RESULTS_SEARCH_8_xml:id	SEARCH:2:637466695384099484_3
RESULTS_SEARCH_8_PARAMETERS_chemical_data_edited	FALSE
RESULTS_SEARCH_8_PARAMETERS_do_multiprecursor_search	TRUE
RESULTS_SEARCH_8_PARAMETERS_do_reverse_search	TRUE
RESULTS_SEARCH_8_PARAMETERS_max_quant_labels	35
RESULTS_SEARCH_8_PARAMETERS_maxresults	15
RESULTS_SEARCH_8_PARAMETERS_separate_searches	FALSE
RESULTS_SEARCH_8_PARAMETERS_MSTOLERANCE_type	dalton
RESULTS_SEARCH_8_PARAMETERS_MSTOLERANCE_value	0.05
RESULTS_SEARCH_8_PARAMETERS_MSMSTOLERANCE_type	dalton
RESULTS_SEARCH_8_PARAMETERS_MSMSTOLERANCE_value	0.1
RESULTS_SEARCH_8_PARAMETERS_MS_STANDARD_DEVIATION_type	dalton
RESULTS_SEARCH_8_PARAMETERS_MS_STANDARD_DEVIATION_value	0.0011
RESULTS_SEARCH_8_PARAMETERS_MSMS_STANDARD_DEVIATION_type	dalton
RESULTS_SEARCH_8_PARAMETERS_MSMS_STANDARD_DEVIATION_value	0.01
RESULTS_SEARCH_8_PARAMETERS_FASTA_filename	C:\AB SCIEX\ProteinPilot Data\SearchDatabases\uniprot-zebrafish_with_Clover.fasta
RESULTS_SEARCH_8_PARAMETERS_AUTO_CALIBRATION_ms	TRUE
RESULTS_SEARCH_8_PARAMETERS_AUTO_CALIBRATION_msexport	FALSE
RESULTS_SEARCH_8_PARAMETERS_AUTO_CALIBRATION_msms	TRUE
RESULTS_SEARCH_8_PARAMETERS_AUTO_CALIBRATION_msmstolsdratio	2.75
RESULTS_SEARCH_8_PARAMETERS_AUTO_CALIBRATION_mstolsdratio	7
RESULTS_SEARCH_8_PARAMETERS_AUTO_CALIBRATION_squareroot	TRUE
RESULTS_SEARCH_8_PARAMETERS_AUTO_CALIBRATION_type	dalton
RESULTS_SEARCH_8_PARAMETERS_AUTO_CALIBRATION_MCP_d_s_s_f	0.0666667
RESULTS_SEARCH_8_PARAMETERS_AUTO_CALIBRATION_MCP_d_s_w_f	3
RESULTS_SEARCH_8_PARAMETERS_AUTO_CALIBRATION_MCP_m_f_r_mbc	200
RESULTS_SEARCH_8_PARAMETERS_AUTO_CALIBRATION_MCP_m_m_c	10
RESULTS_SEARCH_8_PARAMETERS_AUTO_CALIBRATION_MCP_m_m_f_s	0.25
RESULTS_SEARCH_8_PARAMETERS_AUTO_CALIBRATION_MCP_m_m_p_f	0.33
RESULTS_SEARCH_8_PARAMETERS_AUTO_CALIBRATION_MCP_m_m_p_rms_f	1
RESULTS_SEARCH_8_PARAMETERS_AUTO_CALIBRATION_MCP_m_p_t_f	1
RESULTS_SEARCH_8_PARAMETERS_AUTO_CALIBRATION_MCP_m_r_h_n_b	15
RESULTS_SEARCH_8_PARAMETERS_AUTO_CALIBRATION_MCP_m_z_n_s	99
RESULTS_SEARCH_8_PARAMETERS_AUTO_CALIBRATION_MCP_m_z_s_mn_f_r	0.0666667
RESULTS_SEARCH_8_PARAMETERS_AUTO_CALIBRATION_MCP_m_z_s_mx_f_r	0.1
RESULTS_SEARCH_8_PARAMETERS_MS_AUTO_CALIBRATION_OUT_avres	-2.4691e-10
RESULTS_SEARCH_8_PARAMETERS_MS_AUTO_CALIBRATION_OUT_c0	-9.44066e-07
RESULTS_SEARCH_8_PARAMETERS_MS_AUTO_CALIBRATION_OUT_c1minus1	-6.62854e-07
RESULTS_SEARCH_8_PARAMETERS_MS_AUTO_CALIBRATION_OUT_c2	0
RESULTS_SEARCH_8_PARAMETERS_MS_AUTO_CALIBRATION_OUT_file	3
RESULTS_SEARCH_8_PARAMETERS_MS_AUTO_CALIBRATION_OUT_partnumber	4
RESULTS_SEARCH_8_PARAMETERS_MS_AUTO_CALIBRATION_OUT_polyorder	1
RESULTS_SEARCH_8_PARAMETERS_MS_AUTO_CALIBRATION_OUT_sample	1
RESULTS_SEARCH_8_PARAMETERS_MS_AUTO_CALIBRATION_OUT_squareroot	TRUE
RESULTS_SEARCH_8_PARAMETERS_MSMS_AUTO_CALIBRATION_OUT_avres	-7.24573e-08
RESULTS_SEARCH_8_PARAMETERS_MSMS_AUTO_CALIBRATION_OUT_c0	-2.98938e-05
RESULTS_SEARCH_8_PARAMETERS_MSMS_AUTO_CALIBRATION_OUT_c1minus1	9.58416e-07
RESULTS_SEARCH_8_PARAMETERS_MSMS_AUTO_CALIBRATION_OUT_c2	0
RESULTS_SEARCH_8_PARAMETERS_MSMS_AUTO_CALIBRATION_OUT_file	3
RESULTS_SEARCH_8_PARAMETERS_MSMS_AUTO_CALIBRATION_OUT_partnumber	4
RESULTS_SEARCH_8_PARAMETERS_MSMS_AUTO_CALIBRATION_OUT_polyorder	1
RESULTS_SEARCH_8_PARAMETERS_MSMS_AUTO_CALIBRATION_OUT_sample	1
RESULTS_SEARCH_8_PARAMETERS_MSMS_AUTO_CALIBRATION_OUT_squareroot	TRUE
RESULTS_SEARCH_8_PARAMETERS_MAX_PRECURSORS_FRAGLET	5
RESULTS_SEARCH_8_PARAMETERS_MAX_PRECURSORS_TAGLET	1
RESULTS_SEARCH_8_PARAMETERS_PRECURSORS_DR_FRAGLET	10
RESULTS_SEARCH_8_PARAMETERS_PRECURSORS_DR_TAGLET	1900-01-03
RESULTS_SEARCH_8_PARAMETERS_DEFAULT_CHARGE_STATE_1_charge	2
RESULTS_SEARCH_8_PARAMETERS_DEFAULT_CHARGE_STATE_1_probability	1
RESULTS_SEARCH_8_PARAMETERS_DEFAULT_CHARGE_STATE_2_charge	3
RESULTS_SEARCH_8_PARAMETERS_DEFAULT_CHARGE_STATE_2_probability	1900-01-01
RESULTS_SEARCH_8_PARAMETERS_DEFAULT_CHARGE_STATE_3_charge	4
RESULTS_SEARCH_8_PARAMETERS_DEFAULT_CHARGE_STATE_3_probability	1
RESULTS_SEARCH_8_PARAMETERS_VERSION	5.0.1.0, 4895
RESULTS_SEARCH_8_PARAMETERS_PARAGON_VERSION	5.0.1.0, 4874
RESULTS_SEARCH_8_PARAMETERS_APPLICATION	ProteinPilot(tm) Software
RESULTS_SEARCH_8_PARAMETERS_PROGROUP_alternativedispositionmaximumfoldprobabilitydrop	100
RESULTS_SEARCH_8_PARAMETERS_PROGROUP_alternativedispositionmaximumfoldscoredrop	2
RESULTS_SEARCH_8_PARAMETERS_PROGROUP_autodiscordantpeptidethreshold	0.3
RESULTS_SEARCH_8_PARAMETERS_PROGROUP_bayesconfidencecalclulation	TRUE
RESULTS_SEARCH_8_PARAMETERS_PROGROUP_calibrateconfidence	TRUE
RESULTS_SEARCH_8_PARAMETERS_PROGROUP_compresspeptides	FALSE
RESULTS_SEARCH_8_PARAMETERS_PROGROUP_confidencepercentthresholdforexcludingothersfromquant	15
RESULTS_SEARCH_8_PARAMETERS_PROGROUP_confidencepercentthresholdforincludingselfinquant	1900-01-15
RESULTS_SEARCH_8_PARAMETERS_PROGROUP_donotstoremspeaklists	FALSE
RESULTS_SEARCH_8_PARAMETERS_PROGROUP_fasta	C:\AB SCIEX\ProteinPilot Data\SearchDatabases\uniprot-zebrafish_with_Clover.fasta
RESULTS_SEARCH_8_PARAMETERS_PROGROUP_featuregroupminpepconf	0.66
RESULTS_SEARCH_8_PARAMETERS_PROGROUP_featuregroupminups	0.47
RESULTS_SEARCH_8_PARAMETERS_PROGROUP_focusingintersection	4
RESULTS_SEARCH_8_PARAMETERS_PROGROUP_focusingminimummatchconfidence	0.1
RESULTS_SEARCH_8_PARAMETERS_PROGROUP_focusingminunusedprotscore	0.1
RESULTS_SEARCH_8_PARAMETERS_PROGROUP_focusingsubsetcutoff	6
RESULTS_SEARCH_8_PARAMETERS_PROGROUP_intersection	1.3
RESULTS_SEARCH_8_PARAMETERS_PROGROUP_minimummatchconfidencecutoff	0.001
RESULTS_SEARCH_8_PARAMETERS_PROGROUP_minunusedprotscore	0.0458
RESULTS_SEARCH_8_PARAMETERS_PROGROUP_subsetcutoff	2
RESULTS_SEARCH_8_PARAMETERS_PROGROUP_unusedprotscorethresholdforexcludingothersfromquant	1.3
RESULTS_SEARCH_8_PARAMETERS_PEAKLIST_count	2901
RESULTS_SEARCH_8_PARAMETERS_PEAKLIST_filenumber	3
RESULTS_SEARCH_8_PARAMETERS_PEAKLIST_original_count	2901
RESULTS_SEARCH_8_PARAMETERS_PEAKLIST_originalfilename	C:\AB SCIEX\ProteinPilot Data\Results\Albert\ZX 20200624 6600\ZX 20200624 C4B Control 3.wiff
RESULTS_SEARCH_8_PARAMETERS_PEAKLIST_partnumber	4
RESULTS_SEARCH_8_PARAMETERS_QUANT_TYPE_background_correction	FALSE
RESULTS_SEARCH_8_PARAMETERS_QUANT_TYPE_bias_correction	TRUE
RESULTS_SEARCH_8_PARAMETERS_QUANT_TYPE_keep_extreme_peptides_over_fraction	0
RESULTS_SEARCH_8_PARAMETERS_QUANT_TYPE_low_confidence_check	TRUE
RESULTS_SEARCH_8_PARAMETERS_QUANT_TYPE_low_intensity_check	TRUE
RESULTS_SEARCH_8_PARAMETERS_QUANT_TYPE_median_statistic	TRUE
RESULTS_SEARCH_8_PARAMETERS_QUANT_TYPE_mod_check	TRUE
RESULTS_SEARCH_8_PARAMETERS_QUANT_TYPE_quant_threshold	-1
RESULTS_SEARCH_8_PARAMETERS_QUANT_TYPE_quant_threshold_sn	9
RESULTS_SEARCH_8_PARAMETERS_QUANT_TYPE_separate_searches	FALSE
RESULTS_SEARCH_8_PARAMETERS_QUANT_TYPE_shared_msms_check	TRUE
RESULTS_SEARCH_8_PARAMETERS_PARAGON_METHOD_SETTINGS_UI_SAMPLE_TYPE	Identification
RESULTS_SEARCH_8_PARAMETERS_PARAGON_METHOD_SETTINGS_UI_CYS_ALKYLATION	Iodoacetamide w other Cys mods possible
RESULTS_SEARCH_8_PARAMETERS_PARAGON_METHOD_SETTINGS_UI_DIGESTION	Trypsin + Lys C
RESULTS_SEARCH_8_PARAMETERS_PARAGON_METHOD_SETTINGS_UI_SPECIAL_FACTOR	Gel-based ID
RESULTS_SEARCH_8_PARAMETERS_PARAGON_METHOD_SETTINGS_UI_INSTRUMENT	TripleTOF 6600
RESULTS_SEARCH_8_PARAMETERS_PARAGON_METHOD_SETTINGS_UI_SEARCH_EFFORT	Thorough
RESULTS_SEARCH_8_PARAMETERS_PARAGON_METHOD_SETTINGS_UI_USER_NAME	IMB-MASS02\massuser
RESULTS_SEARCH_8_PARAMETERS_PARAGON_METHOD_SETTINGS_UI_MACHINE_NAME	IMB-MASS02
RESULTS_SEARCH_8_PARAMETERS_PARAGON_METHOD_SETTINGS_UI_SEARCH_ID	6.37467e+17
RESULTS_SEARCH_8_PARAMETERS_PARAGON_METHOD_SETTINGS_UI_START_TIME	2021-01-19 16:12:40
RESULTS_SEARCH_8_PARAMETERS_PARAGON_METHOD_SETTINGS_UI_MIN_UNUSED_PROTSCORE	0.0458
RESULTS_SEARCH_8_PARAMETERS_PARAGON_METHOD_SETTINGS_UI_PSPEP	TRUE
RESULTS_SEARCH_9_time_cpu	185656
RESULTS_SEARCH_9_time_duration	187784
RESULTS_SEARCH_9_version	5.0.1.4874
RESULTS_SEARCH_9_xml:id	SEARCH:1:637466695384099484_4
RESULTS_SEARCH_9_PARAMETERS_chemical_data_edited	FALSE
RESULTS_SEARCH_9_PARAMETERS_do_multiprecursor_search	TRUE
RESULTS_SEARCH_9_PARAMETERS_do_reverse_search	TRUE
RESULTS_SEARCH_9_PARAMETERS_max_quant_labels	35
RESULTS_SEARCH_9_PARAMETERS_maxresults	15
RESULTS_SEARCH_9_PARAMETERS_separate_searches	FALSE
RESULTS_SEARCH_9_PARAMETERS_MSTOLERANCE_type	dalton
RESULTS_SEARCH_9_PARAMETERS_MSTOLERANCE_value	0.05
RESULTS_SEARCH_9_PARAMETERS_MSMSTOLERANCE_type	dalton
RESULTS_SEARCH_9_PARAMETERS_MSMSTOLERANCE_value	0.1
RESULTS_SEARCH_9_PARAMETERS_MS_STANDARD_DEVIATION_type	dalton
RESULTS_SEARCH_9_PARAMETERS_MS_STANDARD_DEVIATION_value	0.0011
RESULTS_SEARCH_9_PARAMETERS_MSMS_STANDARD_DEVIATION_type	dalton
RESULTS_SEARCH_9_PARAMETERS_MSMS_STANDARD_DEVIATION_value	0.01
RESULTS_SEARCH_9_PARAMETERS_FASTA_filename	C:\AB SCIEX\ProteinPilot Data\SearchDatabases\uniprot-zebrafish_with_Clover.fasta
RESULTS_SEARCH_9_PARAMETERS_AUTO_CALIBRATION_ms	TRUE
RESULTS_SEARCH_9_PARAMETERS_AUTO_CALIBRATION_msexport	FALSE
RESULTS_SEARCH_9_PARAMETERS_AUTO_CALIBRATION_msms	TRUE
RESULTS_SEARCH_9_PARAMETERS_AUTO_CALIBRATION_msmstolsdratio	2.75
RESULTS_SEARCH_9_PARAMETERS_AUTO_CALIBRATION_mstolsdratio	7
RESULTS_SEARCH_9_PARAMETERS_AUTO_CALIBRATION_squareroot	TRUE
RESULTS_SEARCH_9_PARAMETERS_AUTO_CALIBRATION_type	dalton
RESULTS_SEARCH_9_PARAMETERS_AUTO_CALIBRATION_MCP_d_s_s_f	0.0666667
RESULTS_SEARCH_9_PARAMETERS_AUTO_CALIBRATION_MCP_d_s_w_f	3
RESULTS_SEARCH_9_PARAMETERS_AUTO_CALIBRATION_MCP_m_f_r_mbc	200
RESULTS_SEARCH_9_PARAMETERS_AUTO_CALIBRATION_MCP_m_m_c	10
RESULTS_SEARCH_9_PARAMETERS_AUTO_CALIBRATION_MCP_m_m_f_s	0.25
RESULTS_SEARCH_9_PARAMETERS_AUTO_CALIBRATION_MCP_m_m_p_f	0.33
RESULTS_SEARCH_9_PARAMETERS_AUTO_CALIBRATION_MCP_m_m_p_rms_f	1
RESULTS_SEARCH_9_PARAMETERS_AUTO_CALIBRATION_MCP_m_p_t_f	1
RESULTS_SEARCH_9_PARAMETERS_AUTO_CALIBRATION_MCP_m_r_h_n_b	15
RESULTS_SEARCH_9_PARAMETERS_AUTO_CALIBRATION_MCP_m_z_n_s	99
RESULTS_SEARCH_9_PARAMETERS_AUTO_CALIBRATION_MCP_m_z_s_mn_f_r	0.0666667
RESULTS_SEARCH_9_PARAMETERS_AUTO_CALIBRATION_MCP_m_z_s_mx_f_r	0.1
RESULTS_SEARCH_9_PARAMETERS_MS_AUTO_CALIBRATION_OUT_avres	-1.25366e-10
RESULTS_SEARCH_9_PARAMETERS_MS_AUTO_CALIBRATION_OUT_c0	3.95087e-05
RESULTS_SEARCH_9_PARAMETERS_MS_AUTO_CALIBRATION_OUT_c1minus1	-2.34441e-06
RESULTS_SEARCH_9_PARAMETERS_MS_AUTO_CALIBRATION_OUT_c2	0
RESULTS_SEARCH_9_PARAMETERS_MS_AUTO_CALIBRATION_OUT_file	3
RESULTS_SEARCH_9_PARAMETERS_MS_AUTO_CALIBRATION_OUT_partnumber	5
RESULTS_SEARCH_9_PARAMETERS_MS_AUTO_CALIBRATION_OUT_polyorder	1
RESULTS_SEARCH_9_PARAMETERS_MS_AUTO_CALIBRATION_OUT_sample	1
RESULTS_SEARCH_9_PARAMETERS_MS_AUTO_CALIBRATION_OUT_squareroot	TRUE
RESULTS_SEARCH_9_PARAMETERS_MSMS_AUTO_CALIBRATION_OUT_avres	-1.43039e-07
RESULTS_SEARCH_9_PARAMETERS_MSMS_AUTO_CALIBRATION_OUT_c0	-1.02507e-05
RESULTS_SEARCH_9_PARAMETERS_MSMS_AUTO_CALIBRATION_OUT_c1minus1	-9.11156e-07
RESULTS_SEARCH_9_PARAMETERS_MSMS_AUTO_CALIBRATION_OUT_c2	0
RESULTS_SEARCH_9_PARAMETERS_MSMS_AUTO_CALIBRATION_OUT_file	3
RESULTS_SEARCH_9_PARAMETERS_MSMS_AUTO_CALIBRATION_OUT_partnumber	5
RESULTS_SEARCH_9_PARAMETERS_MSMS_AUTO_CALIBRATION_OUT_polyorder	1
RESULTS_SEARCH_9_PARAMETERS_MSMS_AUTO_CALIBRATION_OUT_sample	1
RESULTS_SEARCH_9_PARAMETERS_MSMS_AUTO_CALIBRATION_OUT_squareroot	TRUE
RESULTS_SEARCH_9_PARAMETERS_MAX_PRECURSORS_FRAGLET	5
RESULTS_SEARCH_9_PARAMETERS_MAX_PRECURSORS_TAGLET	1
RESULTS_SEARCH_9_PARAMETERS_PRECURSORS_DR_FRAGLET	10
RESULTS_SEARCH_9_PARAMETERS_PRECURSORS_DR_TAGLET	3
RESULTS_SEARCH_9_PARAMETERS_DEFAULT_CHARGE_STATE_1_charge	2
RESULTS_SEARCH_9_PARAMETERS_DEFAULT_CHARGE_STATE_1_probability	1900-01-01
RESULTS_SEARCH_9_PARAMETERS_DEFAULT_CHARGE_STATE_2_charge	3
RESULTS_SEARCH_9_PARAMETERS_DEFAULT_CHARGE_STATE_2_probability	1
RESULTS_SEARCH_9_PARAMETERS_DEFAULT_CHARGE_STATE_3_charge	4
RESULTS_SEARCH_9_PARAMETERS_DEFAULT_CHARGE_STATE_3_probability	1
RESULTS_SEARCH_9_PARAMETERS_VERSION	5.0.1.0, 4895
RESULTS_SEARCH_9_PARAMETERS_PARAGON_VERSION	5.0.1.0, 4874
RESULTS_SEARCH_9_PARAMETERS_APPLICATION	ProteinPilot(tm) Software
RESULTS_SEARCH_9_PARAMETERS_PROGROUP_alternativedispositionmaximumfoldprobabilitydrop	100
RESULTS_SEARCH_9_PARAMETERS_PROGROUP_alternativedispositionmaximumfoldscoredrop	2
RESULTS_SEARCH_9_PARAMETERS_PROGROUP_autodiscordantpeptidethreshold	0.3
RESULTS_SEARCH_9_PARAMETERS_PROGROUP_bayesconfidencecalclulation	TRUE
RESULTS_SEARCH_9_PARAMETERS_PROGROUP_calibrateconfidence	TRUE
RESULTS_SEARCH_9_PARAMETERS_PROGROUP_compresspeptides	FALSE
RESULTS_SEARCH_9_PARAMETERS_PROGROUP_confidencepercentthresholdforexcludingothersfromquant	15
RESULTS_SEARCH_9_PARAMETERS_PROGROUP_confidencepercentthresholdforincludingselfinquant	15
RESULTS_SEARCH_9_PARAMETERS_PROGROUP_donotstoremspeaklists	FALSE
RESULTS_SEARCH_9_PARAMETERS_PROGROUP_fasta	C:\AB SCIEX\ProteinPilot Data\SearchDatabases\uniprot-zebrafish_with_Clover.fasta
RESULTS_SEARCH_9_PARAMETERS_PROGROUP_featuregroupminpepconf	0.66
RESULTS_SEARCH_9_PARAMETERS_PROGROUP_featuregroupminups	0.47
RESULTS_SEARCH_9_PARAMETERS_PROGROUP_focusingintersection	1900-01-04
RESULTS_SEARCH_9_PARAMETERS_PROGROUP_focusingminimummatchconfidence	0.1
RESULTS_SEARCH_9_PARAMETERS_PROGROUP_focusingminunusedprotscore	0.1
RESULTS_SEARCH_9_PARAMETERS_PROGROUP_focusingsubsetcutoff	6
RESULTS_SEARCH_9_PARAMETERS_PROGROUP_intersection	1.3
RESULTS_SEARCH_9_PARAMETERS_PROGROUP_minimummatchconfidencecutoff	0.001
RESULTS_SEARCH_9_PARAMETERS_PROGROUP_minunusedprotscore	0.0458
RESULTS_SEARCH_9_PARAMETERS_PROGROUP_subsetcutoff	2
RESULTS_SEARCH_9_PARAMETERS_PROGROUP_unusedprotscorethresholdforexcludingothersfromquant	1.3
RESULTS_SEARCH_9_PARAMETERS_PEAKLIST_count	2886
RESULTS_SEARCH_9_PARAMETERS_PEAKLIST_filenumber	3
RESULTS_SEARCH_9_PARAMETERS_PEAKLIST_original_count	2886
RESULTS_SEARCH_9_PARAMETERS_PEAKLIST_originalfilename	C:\AB SCIEX\ProteinPilot Data\Results\Albert\ZX 20200624 6600\ZX 20200624 C4B Control 3.wiff
RESULTS_SEARCH_9_PARAMETERS_PEAKLIST_partnumber	5
RESULTS_SEARCH_9_PARAMETERS_QUANT_TYPE_background_correction	FALSE
RESULTS_SEARCH_9_PARAMETERS_QUANT_TYPE_bias_correction	TRUE
RESULTS_SEARCH_9_PARAMETERS_QUANT_TYPE_keep_extreme_peptides_over_fraction	0
RESULTS_SEARCH_9_PARAMETERS_QUANT_TYPE_low_confidence_check	TRUE
RESULTS_SEARCH_9_PARAMETERS_QUANT_TYPE_low_intensity_check	TRUE
RESULTS_SEARCH_9_PARAMETERS_QUANT_TYPE_median_statistic	TRUE
RESULTS_SEARCH_9_PARAMETERS_QUANT_TYPE_mod_check	TRUE
RESULTS_SEARCH_9_PARAMETERS_QUANT_TYPE_quant_threshold	-1
RESULTS_SEARCH_9_PARAMETERS_QUANT_TYPE_quant_threshold_sn	9
RESULTS_SEARCH_9_PARAMETERS_QUANT_TYPE_separate_searches	FALSE
RESULTS_SEARCH_9_PARAMETERS_QUANT_TYPE_shared_msms_check	TRUE
RESULTS_SEARCH_9_PARAMETERS_PARAGON_METHOD_SETTINGS_UI_SAMPLE_TYPE	Identification
RESULTS_SEARCH_9_PARAMETERS_PARAGON_METHOD_SETTINGS_UI_CYS_ALKYLATION	Iodoacetamide w other Cys mods possible
RESULTS_SEARCH_9_PARAMETERS_PARAGON_METHOD_SETTINGS_UI_DIGESTION	Trypsin + Lys C
RESULTS_SEARCH_9_PARAMETERS_PARAGON_METHOD_SETTINGS_UI_SPECIAL_FACTOR	Gel-based ID
RESULTS_SEARCH_9_PARAMETERS_PARAGON_METHOD_SETTINGS_UI_INSTRUMENT	TripleTOF 6600
RESULTS_SEARCH_9_PARAMETERS_PARAGON_METHOD_SETTINGS_UI_SEARCH_EFFORT	Thorough
RESULTS_SEARCH_9_PARAMETERS_PARAGON_METHOD_SETTINGS_UI_USER_NAME	IMB-MASS02\massuser
RESULTS_SEARCH_9_PARAMETERS_PARAGON_METHOD_SETTINGS_UI_MACHINE_NAME	IMB-MASS02
RESULTS_SEARCH_9_PARAMETERS_PARAGON_METHOD_SETTINGS_UI_SEARCH_ID	6.37467e+17
RESULTS_SEARCH_9_PARAMETERS_PARAGON_METHOD_SETTINGS_UI_START_TIME	2021-01-19 16:12:40
RESULTS_SEARCH_9_PARAMETERS_PARAGON_METHOD_SETTINGS_UI_MIN_UNUSED_PROTSCORE	0.0458
RESULTS_SEARCH_9_PARAMETERS_PARAGON_METHOD_SETTINGS_UI_PSPEP	TRUE
RESULTS_SEARCH_10_time_cpu	391390
RESULTS_SEARCH_10_time_duration	391653
RESULTS_SEARCH_10_version	5.0.1.4874
RESULTS_SEARCH_10_xml:id	SEARCH:2:637466695384099484_4
RESULTS_SEARCH_10_PARAMETERS_chemical_data_edited	FALSE
RESULTS_SEARCH_10_PARAMETERS_do_multiprecursor_search	TRUE
RESULTS_SEARCH_10_PARAMETERS_do_reverse_search	TRUE
RESULTS_SEARCH_10_PARAMETERS_max_quant_labels	35
RESULTS_SEARCH_10_PARAMETERS_maxresults	15
RESULTS_SEARCH_10_PARAMETERS_separate_searches	FALSE
RESULTS_SEARCH_10_PARAMETERS_MSTOLERANCE_type	dalton
RESULTS_SEARCH_10_PARAMETERS_MSTOLERANCE_value	0.05
RESULTS_SEARCH_10_PARAMETERS_MSMSTOLERANCE_type	dalton
RESULTS_SEARCH_10_PARAMETERS_MSMSTOLERANCE_value	0.1
RESULTS_SEARCH_10_PARAMETERS_MS_STANDARD_DEVIATION_type	dalton
RESULTS_SEARCH_10_PARAMETERS_MS_STANDARD_DEVIATION_value	0.0011
RESULTS_SEARCH_10_PARAMETERS_MSMS_STANDARD_DEVIATION_type	dalton
RESULTS_SEARCH_10_PARAMETERS_MSMS_STANDARD_DEVIATION_value	0.01
RESULTS_SEARCH_10_PARAMETERS_FASTA_filename	C:\AB SCIEX\ProteinPilot Data\SearchDatabases\uniprot-zebrafish_with_Clover.fasta
RESULTS_SEARCH_10_PARAMETERS_AUTO_CALIBRATION_ms	TRUE
RESULTS_SEARCH_10_PARAMETERS_AUTO_CALIBRATION_msexport	FALSE
RESULTS_SEARCH_10_PARAMETERS_AUTO_CALIBRATION_msms	TRUE
RESULTS_SEARCH_10_PARAMETERS_AUTO_CALIBRATION_msmstolsdratio	2.75
RESULTS_SEARCH_10_PARAMETERS_AUTO_CALIBRATION_mstolsdratio	7
RESULTS_SEARCH_10_PARAMETERS_AUTO_CALIBRATION_squareroot	TRUE
RESULTS_SEARCH_10_PARAMETERS_AUTO_CALIBRATION_type	dalton
RESULTS_SEARCH_10_PARAMETERS_AUTO_CALIBRATION_MCP_d_s_s_f	0.0666667
RESULTS_SEARCH_10_PARAMETERS_AUTO_CALIBRATION_MCP_d_s_w_f	3
RESULTS_SEARCH_10_PARAMETERS_AUTO_CALIBRATION_MCP_m_f_r_mbc	200
RESULTS_SEARCH_10_PARAMETERS_AUTO_CALIBRATION_MCP_m_m_c	10
RESULTS_SEARCH_10_PARAMETERS_AUTO_CALIBRATION_MCP_m_m_f_s	0.25
RESULTS_SEARCH_10_PARAMETERS_AUTO_CALIBRATION_MCP_m_m_p_f	0.33
RESULTS_SEARCH_10_PARAMETERS_AUTO_CALIBRATION_MCP_m_m_p_rms_f	1
RESULTS_SEARCH_10_PARAMETERS_AUTO_CALIBRATION_MCP_m_p_t_f	1
RESULTS_SEARCH_10_PARAMETERS_AUTO_CALIBRATION_MCP_m_r_h_n_b	15
RESULTS_SEARCH_10_PARAMETERS_AUTO_CALIBRATION_MCP_m_z_n_s	99
RESULTS_SEARCH_10_PARAMETERS_AUTO_CALIBRATION_MCP_m_z_s_mn_f_r	0.0666667
RESULTS_SEARCH_10_PARAMETERS_AUTO_CALIBRATION_MCP_m_z_s_mx_f_r	0.1
RESULTS_SEARCH_10_PARAMETERS_MS_AUTO_CALIBRATION_OUT_avres	-1.25366e-10
RESULTS_SEARCH_10_PARAMETERS_MS_AUTO_CALIBRATION_OUT_c0	3.95087e-05
RESULTS_SEARCH_10_PARAMETERS_MS_AUTO_CALIBRATION_OUT_c1minus1	-2.34441e-06
RESULTS_SEARCH_10_PARAMETERS_MS_AUTO_CALIBRATION_OUT_c2	0
RESULTS_SEARCH_10_PARAMETERS_MS_AUTO_CALIBRATION_OUT_file	3
RESULTS_SEARCH_10_PARAMETERS_MS_AUTO_CALIBRATION_OUT_partnumber	5
RESULTS_SEARCH_10_PARAMETERS_MS_AUTO_CALIBRATION_OUT_polyorder	1
RESULTS_SEARCH_10_PARAMETERS_MS_AUTO_CALIBRATION_OUT_sample	1
RESULTS_SEARCH_10_PARAMETERS_MS_AUTO_CALIBRATION_OUT_squareroot	TRUE
RESULTS_SEARCH_10_PARAMETERS_MSMS_AUTO_CALIBRATION_OUT_avres	-1.43039e-07
RESULTS_SEARCH_10_PARAMETERS_MSMS_AUTO_CALIBRATION_OUT_c0	-1.02507e-05
RESULTS_SEARCH_10_PARAMETERS_MSMS_AUTO_CALIBRATION_OUT_c1minus1	-9.11156e-07
RESULTS_SEARCH_10_PARAMETERS_MSMS_AUTO_CALIBRATION_OUT_c2	0
RESULTS_SEARCH_10_PARAMETERS_MSMS_AUTO_CALIBRATION_OUT_file	3
RESULTS_SEARCH_10_PARAMETERS_MSMS_AUTO_CALIBRATION_OUT_partnumber	5
RESULTS_SEARCH_10_PARAMETERS_MSMS_AUTO_CALIBRATION_OUT_polyorder	1
RESULTS_SEARCH_10_PARAMETERS_MSMS_AUTO_CALIBRATION_OUT_sample	1
RESULTS_SEARCH_10_PARAMETERS_MSMS_AUTO_CALIBRATION_OUT_squareroot	TRUE
RESULTS_SEARCH_10_PARAMETERS_MAX_PRECURSORS_FRAGLET	5
RESULTS_SEARCH_10_PARAMETERS_MAX_PRECURSORS_TAGLET	1
RESULTS_SEARCH_10_PARAMETERS_PRECURSORS_DR_FRAGLET	10
RESULTS_SEARCH_10_PARAMETERS_PRECURSORS_DR_TAGLET	3
RESULTS_SEARCH_10_PARAMETERS_DEFAULT_CHARGE_STATE_1_charge	1900-01-02
RESULTS_SEARCH_10_PARAMETERS_DEFAULT_CHARGE_STATE_1_probability	1
RESULTS_SEARCH_10_PARAMETERS_DEFAULT_CHARGE_STATE_2_charge	3
RESULTS_SEARCH_10_PARAMETERS_DEFAULT_CHARGE_STATE_2_probability	1
RESULTS_SEARCH_10_PARAMETERS_DEFAULT_CHARGE_STATE_3_charge	4
RESULTS_SEARCH_10_PARAMETERS_DEFAULT_CHARGE_STATE_3_probability	1
RESULTS_SEARCH_10_PARAMETERS_VERSION	5.0.1.0, 4895
RESULTS_SEARCH_10_PARAMETERS_PARAGON_VERSION	5.0.1.0, 4874
RESULTS_SEARCH_10_PARAMETERS_APPLICATION	ProteinPilot(tm) Software
RESULTS_SEARCH_10_PARAMETERS_PROGROUP_alternativedispositionmaximumfoldprobabilitydrop	100
RESULTS_SEARCH_10_PARAMETERS_PROGROUP_alternativedispositionmaximumfoldscoredrop	2
RESULTS_SEARCH_10_PARAMETERS_PROGROUP_autodiscordantpeptidethreshold	0.3
RESULTS_SEARCH_10_PARAMETERS_PROGROUP_bayesconfidencecalclulation	TRUE
RESULTS_SEARCH_10_PARAMETERS_PROGROUP_calibrateconfidence	TRUE
RESULTS_SEARCH_10_PARAMETERS_PROGROUP_compresspeptides	FALSE
RESULTS_SEARCH_10_PARAMETERS_PROGROUP_confidencepercentthresholdforexcludingothersfromquant	15
RESULTS_SEARCH_10_PARAMETERS_PROGROUP_confidencepercentthresholdforincludingselfinquant	15
RESULTS_SEARCH_10_PARAMETERS_PROGROUP_donotstoremspeaklists	FALSE
RESULTS_SEARCH_10_PARAMETERS_PROGROUP_fasta	C:\AB SCIEX\ProteinPilot Data\SearchDatabases\uniprot-zebrafish_with_Clover.fasta
RESULTS_SEARCH_10_PARAMETERS_PROGROUP_featuregroupminpepconf	0.66
RESULTS_SEARCH_10_PARAMETERS_PROGROUP_featuregroupminups	0.47
RESULTS_SEARCH_10_PARAMETERS_PROGROUP_focusingintersection	4
RESULTS_SEARCH_10_PARAMETERS_PROGROUP_focusingminimummatchconfidence	0.1
RESULTS_SEARCH_10_PARAMETERS_PROGROUP_focusingminunusedprotscore	0.1
RESULTS_SEARCH_10_PARAMETERS_PROGROUP_focusingsubsetcutoff	6
RESULTS_SEARCH_10_PARAMETERS_PROGROUP_intersection	1.3
RESULTS_SEARCH_10_PARAMETERS_PROGROUP_minimummatchconfidencecutoff	0.001
RESULTS_SEARCH_10_PARAMETERS_PROGROUP_minunusedprotscore	01:05:57.120000
RESULTS_SEARCH_10_PARAMETERS_PROGROUP_subsetcutoff	2
RESULTS_SEARCH_10_PARAMETERS_PROGROUP_unusedprotscorethresholdforexcludingothersfromquant	1.3
RESULTS_SEARCH_10_PARAMETERS_PEAKLIST_count	2886
RESULTS_SEARCH_10_PARAMETERS_PEAKLIST_filenumber	3
RESULTS_SEARCH_10_PARAMETERS_PEAKLIST_original_count	2886
RESULTS_SEARCH_10_PARAMETERS_PEAKLIST_originalfilename	C:\AB SCIEX\ProteinPilot Data\Results\Albert\ZX 20200624 6600\ZX 20200624 C4B Control 3.wiff
RESULTS_SEARCH_10_PARAMETERS_PEAKLIST_partnumber	5
RESULTS_SEARCH_10_PARAMETERS_QUANT_TYPE_background_correction	FALSE
RESULTS_SEARCH_10_PARAMETERS_QUANT_TYPE_bias_correction	TRUE
RESULTS_SEARCH_10_PARAMETERS_QUANT_TYPE_keep_extreme_peptides_over_fraction	0
RESULTS_SEARCH_10_PARAMETERS_QUANT_TYPE_low_confidence_check	TRUE
RESULTS_SEARCH_10_PARAMETERS_QUANT_TYPE_low_intensity_check	TRUE
RESULTS_SEARCH_10_PARAMETERS_QUANT_TYPE_median_statistic	TRUE
RESULTS_SEARCH_10_PARAMETERS_QUANT_TYPE_mod_check	TRUE
RESULTS_SEARCH_10_PARAMETERS_QUANT_TYPE_quant_threshold	-1
RESULTS_SEARCH_10_PARAMETERS_QUANT_TYPE_quant_threshold_sn	1900-01-09
RESULTS_SEARCH_10_PARAMETERS_QUANT_TYPE_separate_searches	FALSE
RESULTS_SEARCH_10_PARAMETERS_QUANT_TYPE_shared_msms_check	TRUE
RESULTS_SEARCH_10_PARAMETERS_PARAGON_METHOD_SETTINGS_UI_SAMPLE_TYPE	Identification
RESULTS_SEARCH_10_PARAMETERS_PARAGON_METHOD_SETTINGS_UI_CYS_ALKYLATION	Iodoacetamide w other Cys mods possible
RESULTS_SEARCH_10_PARAMETERS_PARAGON_METHOD_SETTINGS_UI_DIGESTION	Trypsin + Lys C
RESULTS_SEARCH_10_PARAMETERS_PARAGON_METHOD_SETTINGS_UI_SPECIAL_FACTOR	Gel-based ID
RESULTS_SEARCH_10_PARAMETERS_PARAGON_METHOD_SETTINGS_UI_INSTRUMENT	TripleTOF 6600
RESULTS_SEARCH_10_PARAMETERS_PARAGON_METHOD_SETTINGS_UI_SEARCH_EFFORT	Thorough
RESULTS_SEARCH_10_PARAMETERS_PARAGON_METHOD_SETTINGS_UI_USER_NAME	IMB-MASS02\massuser
RESULTS_SEARCH_10_PARAMETERS_PARAGON_METHOD_SETTINGS_UI_MACHINE_NAME	IMB-MASS02
RESULTS_SEARCH_10_PARAMETERS_PARAGON_METHOD_SETTINGS_UI_SEARCH_ID	6.37467e+17
RESULTS_SEARCH_10_PARAMETERS_PARAGON_METHOD_SETTINGS_UI_START_TIME	2021-01-19 16:12:40
RESULTS_SEARCH_10_PARAMETERS_PARAGON_METHOD_SETTINGS_UI_MIN_UNUSED_PROTSCORE	0.0458
RESULTS_SEARCH_10_PARAMETERS_PARAGON_METHOD_SETTINGS_UI_PSPEP	TRUE
RESULTS_SEARCH_11_time_cpu	245202
RESULTS_SEARCH_11_time_duration	250951
RESULTS_SEARCH_11_version	5.0.1.4874
RESULTS_SEARCH_11_xml:id	SEARCH:1:637466695384099484_5
RESULTS_SEARCH_11_PARAMETERS_chemical_data_edited	FALSE
RESULTS_SEARCH_11_PARAMETERS_do_multiprecursor_search	TRUE
RESULTS_SEARCH_11_PARAMETERS_do_reverse_search	TRUE
RESULTS_SEARCH_11_PARAMETERS_max_quant_labels	35
RESULTS_SEARCH_11_PARAMETERS_maxresults	15
RESULTS_SEARCH_11_PARAMETERS_separate_searches	FALSE
RESULTS_SEARCH_11_PARAMETERS_MSTOLERANCE_type	dalton
RESULTS_SEARCH_11_PARAMETERS_MSTOLERANCE_value	0.05
RESULTS_SEARCH_11_PARAMETERS_MSMSTOLERANCE_type	dalton
RESULTS_SEARCH_11_PARAMETERS_MSMSTOLERANCE_value	0.1
RESULTS_SEARCH_11_PARAMETERS_MS_STANDARD_DEVIATION_type	dalton
RESULTS_SEARCH_11_PARAMETERS_MS_STANDARD_DEVIATION_value	0.0011
RESULTS_SEARCH_11_PARAMETERS_MSMS_STANDARD_DEVIATION_type	dalton
RESULTS_SEARCH_11_PARAMETERS_MSMS_STANDARD_DEVIATION_value	0.01
RESULTS_SEARCH_11_PARAMETERS_FASTA_filename	C:\AB SCIEX\ProteinPilot Data\SearchDatabases\uniprot-zebrafish_with_Clover.fasta
RESULTS_SEARCH_11_PARAMETERS_AUTO_CALIBRATION_ms	TRUE
RESULTS_SEARCH_11_PARAMETERS_AUTO_CALIBRATION_msexport	FALSE
RESULTS_SEARCH_11_PARAMETERS_AUTO_CALIBRATION_msms	TRUE
RESULTS_SEARCH_11_PARAMETERS_AUTO_CALIBRATION_msmstolsdratio	2.75
RESULTS_SEARCH_11_PARAMETERS_AUTO_CALIBRATION_mstolsdratio	7
RESULTS_SEARCH_11_PARAMETERS_AUTO_CALIBRATION_squareroot	TRUE
RESULTS_SEARCH_11_PARAMETERS_AUTO_CALIBRATION_type	dalton
RESULTS_SEARCH_11_PARAMETERS_AUTO_CALIBRATION_MCP_d_s_s_f	0.0666667
RESULTS_SEARCH_11_PARAMETERS_AUTO_CALIBRATION_MCP_d_s_w_f	3
RESULTS_SEARCH_11_PARAMETERS_AUTO_CALIBRATION_MCP_m_f_r_mbc	200
RESULTS_SEARCH_11_PARAMETERS_AUTO_CALIBRATION_MCP_m_m_c	10
RESULTS_SEARCH_11_PARAMETERS_AUTO_CALIBRATION_MCP_m_m_f_s	0.25
RESULTS_SEARCH_11_PARAMETERS_AUTO_CALIBRATION_MCP_m_m_p_f	0.33
RESULTS_SEARCH_11_PARAMETERS_AUTO_CALIBRATION_MCP_m_m_p_rms_f	1
RESULTS_SEARCH_11_PARAMETERS_AUTO_CALIBRATION_MCP_m_p_t_f	1
RESULTS_SEARCH_11_PARAMETERS_AUTO_CALIBRATION_MCP_m_r_h_n_b	15
RESULTS_SEARCH_11_PARAMETERS_AUTO_CALIBRATION_MCP_m_z_n_s	99
RESULTS_SEARCH_11_PARAMETERS_AUTO_CALIBRATION_MCP_m_z_s_mn_f_r	0.0666667
RESULTS_SEARCH_11_PARAMETERS_AUTO_CALIBRATION_MCP_m_z_s_mx_f_r	0.1
RESULTS_SEARCH_11_PARAMETERS_MAX_PRECURSORS_FRAGLET	5
RESULTS_SEARCH_11_PARAMETERS_MAX_PRECURSORS_TAGLET	1
RESULTS_SEARCH_11_PARAMETERS_PRECURSORS_DR_FRAGLET	10
RESULTS_SEARCH_11_PARAMETERS_PRECURSORS_DR_TAGLET	3
RESULTS_SEARCH_11_PARAMETERS_DEFAULT_CHARGE_STATE_1_charge	2
RESULTS_SEARCH_11_PARAMETERS_DEFAULT_CHARGE_STATE_1_probability	1
RESULTS_SEARCH_11_PARAMETERS_DEFAULT_CHARGE_STATE_2_charge	3
RESULTS_SEARCH_11_PARAMETERS_DEFAULT_CHARGE_STATE_2_probability	1
RESULTS_SEARCH_11_PARAMETERS_DEFAULT_CHARGE_STATE_3_charge	4
RESULTS_SEARCH_11_PARAMETERS_DEFAULT_CHARGE_STATE_3_probability	1
RESULTS_SEARCH_11_PARAMETERS_VERSION	5.0.1.0, 4895
RESULTS_SEARCH_11_PARAMETERS_PARAGON_VERSION	5.0.1.0, 4874
RESULTS_SEARCH_11_PARAMETERS_APPLICATION	ProteinPilot(tm) Software
RESULTS_SEARCH_11_PARAMETERS_PROGROUP_alternativedispositionmaximumfoldprobabilitydrop	100
RESULTS_SEARCH_11_PARAMETERS_PROGROUP_alternativedispositionmaximumfoldscoredrop	2
RESULTS_SEARCH_11_PARAMETERS_PROGROUP_autodiscordantpeptidethreshold	0.3
RESULTS_SEARCH_11_PARAMETERS_PROGROUP_bayesconfidencecalclulation	TRUE
RESULTS_SEARCH_11_PARAMETERS_PROGROUP_calibrateconfidence	TRUE
RESULTS_SEARCH_11_PARAMETERS_PROGROUP_compresspeptides	FALSE
RESULTS_SEARCH_11_PARAMETERS_PROGROUP_confidencepercentthresholdforexcludingothersfromquant	15
RESULTS_SEARCH_11_PARAMETERS_PROGROUP_confidencepercentthresholdforincludingselfinquant	15
RESULTS_SEARCH_11_PARAMETERS_PROGROUP_donotstoremspeaklists	FALSE
RESULTS_SEARCH_11_PARAMETERS_PROGROUP_fasta	C:\AB SCIEX\ProteinPilot Data\SearchDatabases\uniprot-zebrafish_with_Clover.fasta
RESULTS_SEARCH_11_PARAMETERS_PROGROUP_featuregroupminpepconf	0.66
RESULTS_SEARCH_11_PARAMETERS_PROGROUP_featuregroupminups	0.47
RESULTS_SEARCH_11_PARAMETERS_PROGROUP_focusingintersection	4
RESULTS_SEARCH_11_PARAMETERS_PROGROUP_focusingminimummatchconfidence	0.1
RESULTS_SEARCH_11_PARAMETERS_PROGROUP_focusingminunusedprotscore	0.1
RESULTS_SEARCH_11_PARAMETERS_PROGROUP_focusingsubsetcutoff	6
RESULTS_SEARCH_11_PARAMETERS_PROGROUP_intersection	1.3
RESULTS_SEARCH_11_PARAMETERS_PROGROUP_minimummatchconfidencecutoff	0.001
RESULTS_SEARCH_11_PARAMETERS_PROGROUP_minunusedprotscore	0.0458
RESULTS_SEARCH_11_PARAMETERS_PROGROUP_subsetcutoff	2
RESULTS_SEARCH_11_PARAMETERS_PROGROUP_unusedprotscorethresholdforexcludingothersfromquant	1.3
RESULTS_SEARCH_11_PARAMETERS_PEAKLIST_count	2059
RESULTS_SEARCH_11_PARAMETERS_PEAKLIST_filenumber	4
RESULTS_SEARCH_11_PARAMETERS_PEAKLIST_original_count	2059
RESULTS_SEARCH_11_PARAMETERS_PEAKLIST_originalfilename	C:\AB SCIEX\ProteinPilot Data\Results\Albert\ZX 20200624 6600\ZX 20200624 C4B Control 4.wiff
RESULTS_SEARCH_11_PARAMETERS_PEAKLIST_partnumber	6
RESULTS_SEARCH_11_PARAMETERS_QUANT_TYPE_background_correction	FALSE
RESULTS_SEARCH_11_PARAMETERS_QUANT_TYPE_bias_correction	TRUE
RESULTS_SEARCH_11_PARAMETERS_QUANT_TYPE_keep_extreme_peptides_over_fraction	0
RESULTS_SEARCH_11_PARAMETERS_QUANT_TYPE_low_confidence_check	TRUE
RESULTS_SEARCH_11_PARAMETERS_QUANT_TYPE_low_intensity_check	TRUE
RESULTS_SEARCH_11_PARAMETERS_QUANT_TYPE_median_statistic	TRUE
RESULTS_SEARCH_11_PARAMETERS_QUANT_TYPE_mod_check	TRUE
RESULTS_SEARCH_11_PARAMETERS_QUANT_TYPE_quant_threshold	-1
RESULTS_SEARCH_11_PARAMETERS_QUANT_TYPE_quant_threshold_sn	9
RESULTS_SEARCH_11_PARAMETERS_QUANT_TYPE_separate_searches	FALSE
RESULTS_SEARCH_11_PARAMETERS_QUANT_TYPE_shared_msms_check	TRUE
RESULTS_SEARCH_11_PARAMETERS_PARAGON_METHOD_SETTINGS_UI_SAMPLE_TYPE	Identification
RESULTS_SEARCH_11_PARAMETERS_PARAGON_METHOD_SETTINGS_UI_CYS_ALKYLATION	Iodoacetamide w other Cys mods possible
RESULTS_SEARCH_11_PARAMETERS_PARAGON_METHOD_SETTINGS_UI_DIGESTION	Trypsin + Lys C
RESULTS_SEARCH_11_PARAMETERS_PARAGON_METHOD_SETTINGS_UI_SPECIAL_FACTOR	Gel-based ID
RESULTS_SEARCH_11_PARAMETERS_PARAGON_METHOD_SETTINGS_UI_INSTRUMENT	TripleTOF 6600
RESULTS_SEARCH_11_PARAMETERS_PARAGON_METHOD_SETTINGS_UI_SEARCH_EFFORT	Thorough
RESULTS_SEARCH_11_PARAMETERS_PARAGON_METHOD_SETTINGS_UI_USER_NAME	IMB-MASS02\massuser
RESULTS_SEARCH_11_PARAMETERS_PARAGON_METHOD_SETTINGS_UI_MACHINE_NAME	IMB-MASS02
RESULTS_SEARCH_11_PARAMETERS_PARAGON_METHOD_SETTINGS_UI_SEARCH_ID	6.37467e+17
RESULTS_SEARCH_11_PARAMETERS_PARAGON_METHOD_SETTINGS_UI_START_TIME	2021-01-19 16:12:40
RESULTS_SEARCH_11_PARAMETERS_PARAGON_METHOD_SETTINGS_UI_MIN_UNUSED_PROTSCORE	0.0458
RESULTS_SEARCH_11_PARAMETERS_PARAGON_METHOD_SETTINGS_UI_PSPEP	TRUE
RESULTS_SEARCH_12_time_cpu	380860
RESULTS_SEARCH_12_time_duration	381013
RESULTS_SEARCH_12_version	5.0.1.4874
RESULTS_SEARCH_12_xml:id	SEARCH:2:637466695384099484_5
RESULTS_SEARCH_12_PARAMETERS_chemical_data_edited	FALSE
RESULTS_SEARCH_12_PARAMETERS_do_multiprecursor_search	TRUE
RESULTS_SEARCH_12_PARAMETERS_do_reverse_search	TRUE
RESULTS_SEARCH_12_PARAMETERS_max_quant_labels	35
RESULTS_SEARCH_12_PARAMETERS_maxresults	15
RESULTS_SEARCH_12_PARAMETERS_separate_searches	FALSE
RESULTS_SEARCH_12_PARAMETERS_MSTOLERANCE_type	dalton
RESULTS_SEARCH_12_PARAMETERS_MSTOLERANCE_value	0.05
RESULTS_SEARCH_12_PARAMETERS_MSMSTOLERANCE_type	dalton
RESULTS_SEARCH_12_PARAMETERS_MSMSTOLERANCE_value	0.1
RESULTS_SEARCH_12_PARAMETERS_MS_STANDARD_DEVIATION_type	dalton
RESULTS_SEARCH_12_PARAMETERS_MS_STANDARD_DEVIATION_value	0.0011
RESULTS_SEARCH_12_PARAMETERS_MSMS_STANDARD_DEVIATION_type	dalton
RESULTS_SEARCH_12_PARAMETERS_MSMS_STANDARD_DEVIATION_value	0.01
RESULTS_SEARCH_12_PARAMETERS_FASTA_filename	C:\AB SCIEX\ProteinPilot Data\SearchDatabases\uniprot-zebrafish_with_Clover.fasta
RESULTS_SEARCH_12_PARAMETERS_AUTO_CALIBRATION_ms	TRUE
RESULTS_SEARCH_12_PARAMETERS_AUTO_CALIBRATION_msexport	FALSE
RESULTS_SEARCH_12_PARAMETERS_AUTO_CALIBRATION_msms	TRUE
RESULTS_SEARCH_12_PARAMETERS_AUTO_CALIBRATION_msmstolsdratio	2.75
RESULTS_SEARCH_12_PARAMETERS_AUTO_CALIBRATION_mstolsdratio	7
RESULTS_SEARCH_12_PARAMETERS_AUTO_CALIBRATION_squareroot	TRUE
RESULTS_SEARCH_12_PARAMETERS_AUTO_CALIBRATION_type	dalton
RESULTS_SEARCH_12_PARAMETERS_AUTO_CALIBRATION_MCP_d_s_s_f	0.0666667
RESULTS_SEARCH_12_PARAMETERS_AUTO_CALIBRATION_MCP_d_s_w_f	3
RESULTS_SEARCH_12_PARAMETERS_AUTO_CALIBRATION_MCP_m_f_r_mbc	200
RESULTS_SEARCH_12_PARAMETERS_AUTO_CALIBRATION_MCP_m_m_c	10
RESULTS_SEARCH_12_PARAMETERS_AUTO_CALIBRATION_MCP_m_m_f_s	0.25
RESULTS_SEARCH_12_PARAMETERS_AUTO_CALIBRATION_MCP_m_m_p_f	0.33
RESULTS_SEARCH_12_PARAMETERS_AUTO_CALIBRATION_MCP_m_m_p_rms_f	1
RESULTS_SEARCH_12_PARAMETERS_AUTO_CALIBRATION_MCP_m_p_t_f	1
RESULTS_SEARCH_12_PARAMETERS_AUTO_CALIBRATION_MCP_m_r_h_n_b	15
RESULTS_SEARCH_12_PARAMETERS_AUTO_CALIBRATION_MCP_m_z_n_s	99
RESULTS_SEARCH_12_PARAMETERS_AUTO_CALIBRATION_MCP_m_z_s_mn_f_r	0.0666667
RESULTS_SEARCH_12_PARAMETERS_AUTO_CALIBRATION_MCP_m_z_s_mx_f_r	0.1
RESULTS_SEARCH_12_PARAMETERS_MAX_PRECURSORS_FRAGLET	5
RESULTS_SEARCH_12_PARAMETERS_MAX_PRECURSORS_TAGLET	1
RESULTS_SEARCH_12_PARAMETERS_PRECURSORS_DR_FRAGLET	10
RESULTS_SEARCH_12_PARAMETERS_PRECURSORS_DR_TAGLET	3
RESULTS_SEARCH_12_PARAMETERS_DEFAULT_CHARGE_STATE_1_charge	2
RESULTS_SEARCH_12_PARAMETERS_DEFAULT_CHARGE_STATE_1_probability	1
RESULTS_SEARCH_12_PARAMETERS_DEFAULT_CHARGE_STATE_2_charge	3
RESULTS_SEARCH_12_PARAMETERS_DEFAULT_CHARGE_STATE_2_probability	1
RESULTS_SEARCH_12_PARAMETERS_DEFAULT_CHARGE_STATE_3_charge	4
RESULTS_SEARCH_12_PARAMETERS_DEFAULT_CHARGE_STATE_3_probability	1
RESULTS_SEARCH_12_PARAMETERS_VERSION	5.0.1.0, 4895
RESULTS_SEARCH_12_PARAMETERS_PARAGON_VERSION	5.0.1.0, 4874
RESULTS_SEARCH_12_PARAMETERS_APPLICATION	ProteinPilot(tm) Software
RESULTS_SEARCH_12_PARAMETERS_PROGROUP_alternativedispositionmaximumfoldprobabilitydrop	100
RESULTS_SEARCH_12_PARAMETERS_PROGROUP_alternativedispositionmaximumfoldscoredrop	2
RESULTS_SEARCH_12_PARAMETERS_PROGROUP_autodiscordantpeptidethreshold	0.3
RESULTS_SEARCH_12_PARAMETERS_PROGROUP_bayesconfidencecalclulation	TRUE
RESULTS_SEARCH_12_PARAMETERS_PROGROUP_calibrateconfidence	TRUE
RESULTS_SEARCH_12_PARAMETERS_PROGROUP_compresspeptides	FALSE
RESULTS_SEARCH_12_PARAMETERS_PROGROUP_confidencepercentthresholdforexcludingothersfromquant	1900-01-15
RESULTS_SEARCH_12_PARAMETERS_PROGROUP_confidencepercentthresholdforincludingselfinquant	15
RESULTS_SEARCH_12_PARAMETERS_PROGROUP_donotstoremspeaklists	FALSE
RESULTS_SEARCH_12_PARAMETERS_PROGROUP_fasta	C:\AB SCIEX\ProteinPilot Data\SearchDatabases\uniprot-zebrafish_with_Clover.fasta
RESULTS_SEARCH_12_PARAMETERS_PROGROUP_featuregroupminpepconf	0.66
RESULTS_SEARCH_12_PARAMETERS_PROGROUP_featuregroupminups	0.47
RESULTS_SEARCH_12_PARAMETERS_PROGROUP_focusingintersection	4
RESULTS_SEARCH_12_PARAMETERS_PROGROUP_focusingminimummatchconfidence	0.1
RESULTS_SEARCH_12_PARAMETERS_PROGROUP_focusingminunusedprotscore	0.1
RESULTS_SEARCH_12_PARAMETERS_PROGROUP_focusingsubsetcutoff	6
RESULTS_SEARCH_12_PARAMETERS_PROGROUP_intersection	1.3
RESULTS_SEARCH_12_PARAMETERS_PROGROUP_minimummatchconfidencecutoff	0.001
RESULTS_SEARCH_12_PARAMETERS_PROGROUP_minunusedprotscore	0.0458
RESULTS_SEARCH_12_PARAMETERS_PROGROUP_subsetcutoff	2
RESULTS_SEARCH_12_PARAMETERS_PROGROUP_unusedprotscorethresholdforexcludingothersfromquant	1.3
RESULTS_SEARCH_12_PARAMETERS_PEAKLIST_count	2059
RESULTS_SEARCH_12_PARAMETERS_PEAKLIST_filenumber	4
RESULTS_SEARCH_12_PARAMETERS_PEAKLIST_original_count	2059
RESULTS_SEARCH_12_PARAMETERS_PEAKLIST_originalfilename	C:\AB SCIEX\ProteinPilot Data\Results\Albert\ZX 20200624 6600\ZX 20200624 C4B Control 4.wiff
RESULTS_SEARCH_12_PARAMETERS_PEAKLIST_partnumber	1900-01-06
RESULTS_SEARCH_12_PARAMETERS_QUANT_TYPE_background_correction	FALSE
RESULTS_SEARCH_12_PARAMETERS_QUANT_TYPE_bias_correction	TRUE
RESULTS_SEARCH_12_PARAMETERS_QUANT_TYPE_keep_extreme_peptides_over_fraction	0
RESULTS_SEARCH_12_PARAMETERS_QUANT_TYPE_low_confidence_check	TRUE
RESULTS_SEARCH_12_PARAMETERS_QUANT_TYPE_low_intensity_check	TRUE
RESULTS_SEARCH_12_PARAMETERS_QUANT_TYPE_median_statistic	TRUE
RESULTS_SEARCH_12_PARAMETERS_QUANT_TYPE_mod_check	TRUE
RESULTS_SEARCH_12_PARAMETERS_QUANT_TYPE_quant_threshold	-1
RESULTS_SEARCH_12_PARAMETERS_QUANT_TYPE_quant_threshold_sn	9
RESULTS_SEARCH_12_PARAMETERS_QUANT_TYPE_separate_searches	FALSE
RESULTS_SEARCH_12_PARAMETERS_QUANT_TYPE_shared_msms_check	TRUE
RESULTS_SEARCH_12_PARAMETERS_PARAGON_METHOD_SETTINGS_UI_SAMPLE_TYPE	Identification
RESULTS_SEARCH_12_PARAMETERS_PARAGON_METHOD_SETTINGS_UI_CYS_ALKYLATION	Iodoacetamide w other Cys mods possible
RESULTS_SEARCH_12_PARAMETERS_PARAGON_METHOD_SETTINGS_UI_DIGESTION	Trypsin + Lys C
RESULTS_SEARCH_12_PARAMETERS_PARAGON_METHOD_SETTINGS_UI_SPECIAL_FACTOR	Gel-based ID
RESULTS_SEARCH_12_PARAMETERS_PARAGON_METHOD_SETTINGS_UI_INSTRUMENT	TripleTOF 6600
RESULTS_SEARCH_12_PARAMETERS_PARAGON_METHOD_SETTINGS_UI_SEARCH_EFFORT	Thorough
RESULTS_SEARCH_12_PARAMETERS_PARAGON_METHOD_SETTINGS_UI_USER_NAME	IMB-MASS02\massuser
RESULTS_SEARCH_12_PARAMETERS_PARAGON_METHOD_SETTINGS_UI_MACHINE_NAME	IMB-MASS02
RESULTS_SEARCH_12_PARAMETERS_PARAGON_METHOD_SETTINGS_UI_SEARCH_ID	6.37467e+17
RESULTS_SEARCH_12_PARAMETERS_PARAGON_METHOD_SETTINGS_UI_START_TIME	2021-01-19 16:12:40
RESULTS_SEARCH_12_PARAMETERS_PARAGON_METHOD_SETTINGS_UI_MIN_UNUSED_PROTSCORE	01:05:57.120000
RESULTS_SEARCH_12_PARAMETERS_PARAGON_METHOD_SETTINGS_UI_PSPEP	TRUE
RESULTS_SEARCH_13_time_cpu	195126
RESULTS_SEARCH_13_time_duration	2450-06-08
RESULTS_SEARCH_13_version	5.0.1.4874
RESULTS_SEARCH_13_xml:id	SEARCH:1:637466695384099484_6
RESULTS_SEARCH_13_PARAMETERS_chemical_data_edited	FALSE
RESULTS_SEARCH_13_PARAMETERS_do_multiprecursor_search	TRUE
RESULTS_SEARCH_13_PARAMETERS_do_reverse_search	TRUE
RESULTS_SEARCH_13_PARAMETERS_max_quant_labels	35
RESULTS_SEARCH_13_PARAMETERS_maxresults	15
RESULTS_SEARCH_13_PARAMETERS_separate_searches	FALSE
RESULTS_SEARCH_13_PARAMETERS_MSTOLERANCE_type	dalton
RESULTS_SEARCH_13_PARAMETERS_MSTOLERANCE_value	0.05
RESULTS_SEARCH_13_PARAMETERS_MSMSTOLERANCE_type	dalton
RESULTS_SEARCH_13_PARAMETERS_MSMSTOLERANCE_value	0.1
RESULTS_SEARCH_13_PARAMETERS_MS_STANDARD_DEVIATION_type	dalton
RESULTS_SEARCH_13_PARAMETERS_MS_STANDARD_DEVIATION_value	0.0011
RESULTS_SEARCH_13_PARAMETERS_MSMS_STANDARD_DEVIATION_type	dalton
RESULTS_SEARCH_13_PARAMETERS_MSMS_STANDARD_DEVIATION_value	0.01
RESULTS_SEARCH_13_PARAMETERS_FASTA_filename	C:\AB SCIEX\ProteinPilot Data\SearchDatabases\uniprot-zebrafish_with_Clover.fasta
RESULTS_SEARCH_13_PARAMETERS_AUTO_CALIBRATION_ms	TRUE
RESULTS_SEARCH_13_PARAMETERS_AUTO_CALIBRATION_msexport	FALSE
RESULTS_SEARCH_13_PARAMETERS_AUTO_CALIBRATION_msms	TRUE
RESULTS_SEARCH_13_PARAMETERS_AUTO_CALIBRATION_msmstolsdratio	2.75
RESULTS_SEARCH_13_PARAMETERS_AUTO_CALIBRATION_mstolsdratio	7
RESULTS_SEARCH_13_PARAMETERS_AUTO_CALIBRATION_squareroot	TRUE
RESULTS_SEARCH_13_PARAMETERS_AUTO_CALIBRATION_type	dalton
RESULTS_SEARCH_13_PARAMETERS_AUTO_CALIBRATION_MCP_d_s_s_f	0.0666667
RESULTS_SEARCH_13_PARAMETERS_AUTO_CALIBRATION_MCP_d_s_w_f	3
RESULTS_SEARCH_13_PARAMETERS_AUTO_CALIBRATION_MCP_m_f_r_mbc	200
RESULTS_SEARCH_13_PARAMETERS_AUTO_CALIBRATION_MCP_m_m_c	10
RESULTS_SEARCH_13_PARAMETERS_AUTO_CALIBRATION_MCP_m_m_f_s	0.25
RESULTS_SEARCH_13_PARAMETERS_AUTO_CALIBRATION_MCP_m_m_p_f	0.33
RESULTS_SEARCH_13_PARAMETERS_AUTO_CALIBRATION_MCP_m_m_p_rms_f	1
RESULTS_SEARCH_13_PARAMETERS_AUTO_CALIBRATION_MCP_m_p_t_f	1
RESULTS_SEARCH_13_PARAMETERS_AUTO_CALIBRATION_MCP_m_r_h_n_b	15
RESULTS_SEARCH_13_PARAMETERS_AUTO_CALIBRATION_MCP_m_z_n_s	99
RESULTS_SEARCH_13_PARAMETERS_AUTO_CALIBRATION_MCP_m_z_s_mn_f_r	0.0666667
RESULTS_SEARCH_13_PARAMETERS_AUTO_CALIBRATION_MCP_m_z_s_mx_f_r	0.1
RESULTS_SEARCH_13_PARAMETERS_MAX_PRECURSORS_FRAGLET	5
RESULTS_SEARCH_13_PARAMETERS_MAX_PRECURSORS_TAGLET	1
RESULTS_SEARCH_13_PARAMETERS_PRECURSORS_DR_FRAGLET	10
RESULTS_SEARCH_13_PARAMETERS_PRECURSORS_DR_TAGLET	3
RESULTS_SEARCH_13_PARAMETERS_DEFAULT_CHARGE_STATE_1_charge	2
RESULTS_SEARCH_13_PARAMETERS_DEFAULT_CHARGE_STATE_1_probability	1
RESULTS_SEARCH_13_PARAMETERS_DEFAULT_CHARGE_STATE_2_charge	3
RESULTS_SEARCH_13_PARAMETERS_DEFAULT_CHARGE_STATE_2_probability	1
RESULTS_SEARCH_13_PARAMETERS_DEFAULT_CHARGE_STATE_3_charge	4
RESULTS_SEARCH_13_PARAMETERS_DEFAULT_CHARGE_STATE_3_probability	1
RESULTS_SEARCH_13_PARAMETERS_VERSION	5.0.1.0, 4895
RESULTS_SEARCH_13_PARAMETERS_PARAGON_VERSION	5.0.1.0, 4874
RESULTS_SEARCH_13_PARAMETERS_APPLICATION	ProteinPilot(tm) Software
RESULTS_SEARCH_13_PARAMETERS_PROGROUP_alternativedispositionmaximumfoldprobabilitydrop	100
RESULTS_SEARCH_13_PARAMETERS_PROGROUP_alternativedispositionmaximumfoldscoredrop	2
RESULTS_SEARCH_13_PARAMETERS_PROGROUP_autodiscordantpeptidethreshold	0.3
RESULTS_SEARCH_13_PARAMETERS_PROGROUP_bayesconfidencecalclulation	TRUE
RESULTS_SEARCH_13_PARAMETERS_PROGROUP_calibrateconfidence	TRUE
RESULTS_SEARCH_13_PARAMETERS_PROGROUP_compresspeptides	FALSE
RESULTS_SEARCH_13_PARAMETERS_PROGROUP_confidencepercentthresholdforexcludingothersfromquant	15
RESULTS_SEARCH_13_PARAMETERS_PROGROUP_confidencepercentthresholdforincludingselfinquant	15
RESULTS_SEARCH_13_PARAMETERS_PROGROUP_donotstoremspeaklists	FALSE
RESULTS_SEARCH_13_PARAMETERS_PROGROUP_fasta	C:\AB SCIEX\ProteinPilot Data\SearchDatabases\uniprot-zebrafish_with_Clover.fasta
RESULTS_SEARCH_13_PARAMETERS_PROGROUP_featuregroupminpepconf	0.66
RESULTS_SEARCH_13_PARAMETERS_PROGROUP_featuregroupminups	0.47
RESULTS_SEARCH_13_PARAMETERS_PROGROUP_focusingintersection	4
RESULTS_SEARCH_13_PARAMETERS_PROGROUP_focusingminimummatchconfidence	0.1
RESULTS_SEARCH_13_PARAMETERS_PROGROUP_focusingminunusedprotscore	02:24:00
RESULTS_SEARCH_13_PARAMETERS_PROGROUP_focusingsubsetcutoff	6
RESULTS_SEARCH_13_PARAMETERS_PROGROUP_intersection	1.3
RESULTS_SEARCH_13_PARAMETERS_PROGROUP_minimummatchconfidencecutoff	0.001
RESULTS_SEARCH_13_PARAMETERS_PROGROUP_minunusedprotscore	0.0458
RESULTS_SEARCH_13_PARAMETERS_PROGROUP_subsetcutoff	2
RESULTS_SEARCH_13_PARAMETERS_PROGROUP_unusedprotscorethresholdforexcludingothersfromquant	1.3
RESULTS_SEARCH_13_PARAMETERS_PEAKLIST_count	1793
RESULTS_SEARCH_13_PARAMETERS_PEAKLIST_filenumber	5
RESULTS_SEARCH_13_PARAMETERS_PEAKLIST_original_count	1793
RESULTS_SEARCH_13_PARAMETERS_PEAKLIST_originalfilename	C:\AB SCIEX\ProteinPilot Data\Results\Albert\ZX 20200624 6600\ZX 20200624 C4B Control 5.wiff
RESULTS_SEARCH_13_PARAMETERS_PEAKLIST_partnumber	7
RESULTS_SEARCH_13_PARAMETERS_QUANT_TYPE_background_correction	FALSE
RESULTS_SEARCH_13_PARAMETERS_QUANT_TYPE_bias_correction	TRUE
RESULTS_SEARCH_13_PARAMETERS_QUANT_TYPE_keep_extreme_peptides_over_fraction	0
RESULTS_SEARCH_13_PARAMETERS_QUANT_TYPE_low_confidence_check	TRUE
RESULTS_SEARCH_13_PARAMETERS_QUANT_TYPE_low_intensity_check	TRUE
RESULTS_SEARCH_13_PARAMETERS_QUANT_TYPE_median_statistic	TRUE
RESULTS_SEARCH_13_PARAMETERS_QUANT_TYPE_mod_check	TRUE
RESULTS_SEARCH_13_PARAMETERS_QUANT_TYPE_quant_threshold	-1
RESULTS_SEARCH_13_PARAMETERS_QUANT_TYPE_quant_threshold_sn	9
RESULTS_SEARCH_13_PARAMETERS_QUANT_TYPE_separate_searches	FALSE
RESULTS_SEARCH_13_PARAMETERS_QUANT_TYPE_shared_msms_check	TRUE
RESULTS_SEARCH_13_PARAMETERS_PARAGON_METHOD_SETTINGS_UI_SAMPLE_TYPE	Identification
RESULTS_SEARCH_13_PARAMETERS_PARAGON_METHOD_SETTINGS_UI_CYS_ALKYLATION	Iodoacetamide w other Cys mods possible
RESULTS_SEARCH_13_PARAMETERS_PARAGON_METHOD_SETTINGS_UI_DIGESTION	Trypsin + Lys C
RESULTS_SEARCH_13_PARAMETERS_PARAGON_METHOD_SETTINGS_UI_SPECIAL_FACTOR	Gel-based ID
RESULTS_SEARCH_13_PARAMETERS_PARAGON_METHOD_SETTINGS_UI_INSTRUMENT	TripleTOF 6600
RESULTS_SEARCH_13_PARAMETERS_PARAGON_METHOD_SETTINGS_UI_SEARCH_EFFORT	Thorough
RESULTS_SEARCH_13_PARAMETERS_PARAGON_METHOD_SETTINGS_UI_USER_NAME	IMB-MASS02\massuser
RESULTS_SEARCH_13_PARAMETERS_PARAGON_METHOD_SETTINGS_UI_MACHINE_NAME	IMB-MASS02
RESULTS_SEARCH_13_PARAMETERS_PARAGON_METHOD_SETTINGS_UI_SEARCH_ID	6.37467e+17
RESULTS_SEARCH_13_PARAMETERS_PARAGON_METHOD_SETTINGS_UI_START_TIME	2021-01-19 16:12:40
RESULTS_SEARCH_13_PARAMETERS_PARAGON_METHOD_SETTINGS_UI_MIN_UNUSED_PROTSCORE	0.0458
RESULTS_SEARCH_13_PARAMETERS_PARAGON_METHOD_SETTINGS_UI_PSPEP	TRUE
RESULTS_SEARCH_14_time_cpu	271894
RESULTS_SEARCH_14_time_duration	272058
RESULTS_SEARCH_14_version	5.0.1.4874
RESULTS_SEARCH_14_xml:id	SEARCH:2:637466695384099484_6
RESULTS_SEARCH_14_PARAMETERS_chemical_data_edited	FALSE
RESULTS_SEARCH_14_PARAMETERS_do_multiprecursor_search	TRUE
RESULTS_SEARCH_14_PARAMETERS_do_reverse_search	TRUE
RESULTS_SEARCH_14_PARAMETERS_max_quant_labels	35
RESULTS_SEARCH_14_PARAMETERS_maxresults	15
RESULTS_SEARCH_14_PARAMETERS_separate_searches	FALSE
RESULTS_SEARCH_14_PARAMETERS_MSTOLERANCE_type	dalton
RESULTS_SEARCH_14_PARAMETERS_MSTOLERANCE_value	0.05
RESULTS_SEARCH_14_PARAMETERS_MSMSTOLERANCE_type	dalton
RESULTS_SEARCH_14_PARAMETERS_MSMSTOLERANCE_value	0.1
RESULTS_SEARCH_14_PARAMETERS_MS_STANDARD_DEVIATION_type	dalton
RESULTS_SEARCH_14_PARAMETERS_MS_STANDARD_DEVIATION_value	0.0011
RESULTS_SEARCH_14_PARAMETERS_MSMS_STANDARD_DEVIATION_type	dalton
RESULTS_SEARCH_14_PARAMETERS_MSMS_STANDARD_DEVIATION_value	0.01
RESULTS_SEARCH_14_PARAMETERS_FASTA_filename	C:\AB SCIEX\ProteinPilot Data\SearchDatabases\uniprot-zebrafish_with_Clover.fasta
RESULTS_SEARCH_14_PARAMETERS_AUTO_CALIBRATION_ms	TRUE
RESULTS_SEARCH_14_PARAMETERS_AUTO_CALIBRATION_msexport	FALSE
RESULTS_SEARCH_14_PARAMETERS_AUTO_CALIBRATION_msms	TRUE
RESULTS_SEARCH_14_PARAMETERS_AUTO_CALIBRATION_msmstolsdratio	2.75
RESULTS_SEARCH_14_PARAMETERS_AUTO_CALIBRATION_mstolsdratio	7
RESULTS_SEARCH_14_PARAMETERS_AUTO_CALIBRATION_squareroot	TRUE
RESULTS_SEARCH_14_PARAMETERS_AUTO_CALIBRATION_type	dalton
RESULTS_SEARCH_14_PARAMETERS_AUTO_CALIBRATION_MCP_d_s_s_f	0.0666667
RESULTS_SEARCH_14_PARAMETERS_AUTO_CALIBRATION_MCP_d_s_w_f	3
RESULTS_SEARCH_14_PARAMETERS_AUTO_CALIBRATION_MCP_m_f_r_mbc	200
RESULTS_SEARCH_14_PARAMETERS_AUTO_CALIBRATION_MCP_m_m_c	10
RESULTS_SEARCH_14_PARAMETERS_AUTO_CALIBRATION_MCP_m_m_f_s	0.25
RESULTS_SEARCH_14_PARAMETERS_AUTO_CALIBRATION_MCP_m_m_p_f	0.33
RESULTS_SEARCH_14_PARAMETERS_AUTO_CALIBRATION_MCP_m_m_p_rms_f	1
RESULTS_SEARCH_14_PARAMETERS_AUTO_CALIBRATION_MCP_m_p_t_f	1
RESULTS_SEARCH_14_PARAMETERS_AUTO_CALIBRATION_MCP_m_r_h_n_b	15
RESULTS_SEARCH_14_PARAMETERS_AUTO_CALIBRATION_MCP_m_z_n_s	99
RESULTS_SEARCH_14_PARAMETERS_AUTO_CALIBRATION_MCP_m_z_s_mn_f_r	0.0666667
RESULTS_SEARCH_14_PARAMETERS_AUTO_CALIBRATION_MCP_m_z_s_mx_f_r	0.1
RESULTS_SEARCH_14_PARAMETERS_MAX_PRECURSORS_FRAGLET	5
RESULTS_SEARCH_14_PARAMETERS_MAX_PRECURSORS_TAGLET	1
RESULTS_SEARCH_14_PARAMETERS_PRECURSORS_DR_FRAGLET	10
RESULTS_SEARCH_14_PARAMETERS_PRECURSORS_DR_TAGLET	3
RESULTS_SEARCH_14_PARAMETERS_DEFAULT_CHARGE_STATE_1_charge	2
RESULTS_SEARCH_14_PARAMETERS_DEFAULT_CHARGE_STATE_1_probability	1
RESULTS_SEARCH_14_PARAMETERS_DEFAULT_CHARGE_STATE_2_charge	3
RESULTS_SEARCH_14_PARAMETERS_DEFAULT_CHARGE_STATE_2_probability	1
RESULTS_SEARCH_14_PARAMETERS_DEFAULT_CHARGE_STATE_3_charge	4
RESULTS_SEARCH_14_PARAMETERS_DEFAULT_CHARGE_STATE_3_probability	1
RESULTS_SEARCH_14_PARAMETERS_VERSION	5.0.1.0, 4895
RESULTS_SEARCH_14_PARAMETERS_PARAGON_VERSION	5.0.1.0, 4874
RESULTS_SEARCH_14_PARAMETERS_APPLICATION	ProteinPilot(tm) Software
RESULTS_SEARCH_14_PARAMETERS_PROGROUP_alternativedispositionmaximumfoldprobabilitydrop	100
RESULTS_SEARCH_14_PARAMETERS_PROGROUP_alternativedispositionmaximumfoldscoredrop	2
RESULTS_SEARCH_14_PARAMETERS_PROGROUP_autodiscordantpeptidethreshold	0.3
RESULTS_SEARCH_14_PARAMETERS_PROGROUP_bayesconfidencecalclulation	TRUE
RESULTS_SEARCH_14_PARAMETERS_PROGROUP_calibrateconfidence	TRUE
RESULTS_SEARCH_14_PARAMETERS_PROGROUP_compresspeptides	FALSE
RESULTS_SEARCH_14_PARAMETERS_PROGROUP_confidencepercentthresholdforexcludingothersfromquant	15
RESULTS_SEARCH_14_PARAMETERS_PROGROUP_confidencepercentthresholdforincludingselfinquant	15
RESULTS_SEARCH_14_PARAMETERS_PROGROUP_donotstoremspeaklists	FALSE
RESULTS_SEARCH_14_PARAMETERS_PROGROUP_fasta	C:\AB SCIEX\ProteinPilot Data\SearchDatabases\uniprot-zebrafish_with_Clover.fasta
RESULTS_SEARCH_14_PARAMETERS_PROGROUP_featuregroupminpepconf	0.66
RESULTS_SEARCH_14_PARAMETERS_PROGROUP_featuregroupminups	0.47
RESULTS_SEARCH_14_PARAMETERS_PROGROUP_focusingintersection	4
RESULTS_SEARCH_14_PARAMETERS_PROGROUP_focusingminimummatchconfidence	0.1
RESULTS_SEARCH_14_PARAMETERS_PROGROUP_focusingminunusedprotscore	0.1
RESULTS_SEARCH_14_PARAMETERS_PROGROUP_focusingsubsetcutoff	6
RESULTS_SEARCH_14_PARAMETERS_PROGROUP_intersection	1.3
RESULTS_SEARCH_14_PARAMETERS_PROGROUP_minimummatchconfidencecutoff	0.001
RESULTS_SEARCH_14_PARAMETERS_PROGROUP_minunusedprotscore	0.0458
RESULTS_SEARCH_14_PARAMETERS_PROGROUP_subsetcutoff	2
RESULTS_SEARCH_14_PARAMETERS_PROGROUP_unusedprotscorethresholdforexcludingothersfromquant	1.3
RESULTS_SEARCH_14_PARAMETERS_PEAKLIST_count	1793
RESULTS_SEARCH_14_PARAMETERS_PEAKLIST_filenumber	5
RESULTS_SEARCH_14_PARAMETERS_PEAKLIST_original_count	1793
RESULTS_SEARCH_14_PARAMETERS_PEAKLIST_originalfilename	C:\AB SCIEX\ProteinPilot Data\Results\Albert\ZX 20200624 6600\ZX 20200624 C4B Control 5.wiff
RESULTS_SEARCH_14_PARAMETERS_PEAKLIST_partnumber	7
RESULTS_SEARCH_14_PARAMETERS_QUANT_TYPE_background_correction	FALSE
RESULTS_SEARCH_14_PARAMETERS_QUANT_TYPE_bias_correction	TRUE
RESULTS_SEARCH_14_PARAMETERS_QUANT_TYPE_keep_extreme_peptides_over_fraction	0
RESULTS_SEARCH_14_PARAMETERS_QUANT_TYPE_low_confidence_check	TRUE
RESULTS_SEARCH_14_PARAMETERS_QUANT_TYPE_low_intensity_check	TRUE
RESULTS_SEARCH_14_PARAMETERS_QUANT_TYPE_median_statistic	TRUE
RESULTS_SEARCH_14_PARAMETERS_QUANT_TYPE_mod_check	TRUE
RESULTS_SEARCH_14_PARAMETERS_QUANT_TYPE_quant_threshold	-1
RESULTS_SEARCH_14_PARAMETERS_QUANT_TYPE_quant_threshold_sn	9
RESULTS_SEARCH_14_PARAMETERS_QUANT_TYPE_separate_searches	FALSE
RESULTS_SEARCH_14_PARAMETERS_QUANT_TYPE_shared_msms_check	TRUE
RESULTS_SEARCH_14_PARAMETERS_PARAGON_METHOD_SETTINGS_UI_SAMPLE_TYPE	Identification
RESULTS_SEARCH_14_PARAMETERS_PARAGON_METHOD_SETTINGS_UI_CYS_ALKYLATION	Iodoacetamide w other Cys mods possible
RESULTS_SEARCH_14_PARAMETERS_PARAGON_METHOD_SETTINGS_UI_DIGESTION	Trypsin + Lys C
RESULTS_SEARCH_14_PARAMETERS_PARAGON_METHOD_SETTINGS_UI_SPECIAL_FACTOR	Gel-based ID
RESULTS_SEARCH_14_PARAMETERS_PARAGON_METHOD_SETTINGS_UI_INSTRUMENT	TripleTOF 6600
RESULTS_SEARCH_14_PARAMETERS_PARAGON_METHOD_SETTINGS_UI_SEARCH_EFFORT	Thorough
RESULTS_SEARCH_14_PARAMETERS_PARAGON_METHOD_SETTINGS_UI_USER_NAME	IMB-MASS02\massuser
RESULTS_SEARCH_14_PARAMETERS_PARAGON_METHOD_SETTINGS_UI_MACHINE_NAME	IMB-MASS02
RESULTS_SEARCH_14_PARAMETERS_PARAGON_METHOD_SETTINGS_UI_SEARCH_ID	6.37467e+17
RESULTS_SEARCH_14_PARAMETERS_PARAGON_METHOD_SETTINGS_UI_START_TIME	2021-01-19 16:12:40
RESULTS_SEARCH_14_PARAMETERS_PARAGON_METHOD_SETTINGS_UI_MIN_UNUSED_PROTSCORE	0.0458
RESULTS_SEARCH_14_PARAMETERS_PARAGON_METHOD_SETTINGS_UI_PSPEP	TRUE
RESULTS_SEARCH_15_time_cpu	225998
RESULTS_SEARCH_15_time_duration	232464
RESULTS_SEARCH_15_version	5.0.1.4874
RESULTS_SEARCH_15_xml:id	SEARCH:1:637466695384099484_7
RESULTS_SEARCH_15_PARAMETERS_chemical_data_edited	FALSE
RESULTS_SEARCH_15_PARAMETERS_do_multiprecursor_search	TRUE
RESULTS_SEARCH_15_PARAMETERS_do_reverse_search	TRUE
RESULTS_SEARCH_15_PARAMETERS_max_quant_labels	35
RESULTS_SEARCH_15_PARAMETERS_maxresults	15
RESULTS_SEARCH_15_PARAMETERS_separate_searches	FALSE
RESULTS_SEARCH_15_PARAMETERS_MSTOLERANCE_type	dalton
RESULTS_SEARCH_15_PARAMETERS_MSTOLERANCE_value	0.05
RESULTS_SEARCH_15_PARAMETERS_MSMSTOLERANCE_type	dalton
RESULTS_SEARCH_15_PARAMETERS_MSMSTOLERANCE_value	0.1
RESULTS_SEARCH_15_PARAMETERS_MS_STANDARD_DEVIATION_type	dalton
RESULTS_SEARCH_15_PARAMETERS_MS_STANDARD_DEVIATION_value	0.0011
RESULTS_SEARCH_15_PARAMETERS_MSMS_STANDARD_DEVIATION_type	dalton
RESULTS_SEARCH_15_PARAMETERS_MSMS_STANDARD_DEVIATION_value	0.01
RESULTS_SEARCH_15_PARAMETERS_FASTA_filename	C:\AB SCIEX\ProteinPilot Data\SearchDatabases\uniprot-zebrafish_with_Clover.fasta
RESULTS_SEARCH_15_PARAMETERS_AUTO_CALIBRATION_ms	TRUE
RESULTS_SEARCH_15_PARAMETERS_AUTO_CALIBRATION_msexport	FALSE
RESULTS_SEARCH_15_PARAMETERS_AUTO_CALIBRATION_msms	TRUE
RESULTS_SEARCH_15_PARAMETERS_AUTO_CALIBRATION_msmstolsdratio	2.75
RESULTS_SEARCH_15_PARAMETERS_AUTO_CALIBRATION_mstolsdratio	7
RESULTS_SEARCH_15_PARAMETERS_AUTO_CALIBRATION_squareroot	TRUE
RESULTS_SEARCH_15_PARAMETERS_AUTO_CALIBRATION_type	dalton
RESULTS_SEARCH_15_PARAMETERS_AUTO_CALIBRATION_MCP_d_s_s_f	0.0666667
RESULTS_SEARCH_15_PARAMETERS_AUTO_CALIBRATION_MCP_d_s_w_f	3
RESULTS_SEARCH_15_PARAMETERS_AUTO_CALIBRATION_MCP_m_f_r_mbc	200
RESULTS_SEARCH_15_PARAMETERS_AUTO_CALIBRATION_MCP_m_m_c	10
RESULTS_SEARCH_15_PARAMETERS_AUTO_CALIBRATION_MCP_m_m_f_s	0.25
RESULTS_SEARCH_15_PARAMETERS_AUTO_CALIBRATION_MCP_m_m_p_f	0.33
RESULTS_SEARCH_15_PARAMETERS_AUTO_CALIBRATION_MCP_m_m_p_rms_f	1
RESULTS_SEARCH_15_PARAMETERS_AUTO_CALIBRATION_MCP_m_p_t_f	1
RESULTS_SEARCH_15_PARAMETERS_AUTO_CALIBRATION_MCP_m_r_h_n_b	15
RESULTS_SEARCH_15_PARAMETERS_AUTO_CALIBRATION_MCP_m_z_n_s	99
RESULTS_SEARCH_15_PARAMETERS_AUTO_CALIBRATION_MCP_m_z_s_mn_f_r	0.0666667
RESULTS_SEARCH_15_PARAMETERS_AUTO_CALIBRATION_MCP_m_z_s_mx_f_r	0.1
RESULTS_SEARCH_15_PARAMETERS_MAX_PRECURSORS_FRAGLET	5
RESULTS_SEARCH_15_PARAMETERS_MAX_PRECURSORS_TAGLET	1
RESULTS_SEARCH_15_PARAMETERS_PRECURSORS_DR_FRAGLET	10
RESULTS_SEARCH_15_PARAMETERS_PRECURSORS_DR_TAGLET	3
RESULTS_SEARCH_15_PARAMETERS_DEFAULT_CHARGE_STATE_1_charge	2
RESULTS_SEARCH_15_PARAMETERS_DEFAULT_CHARGE_STATE_1_probability	1
RESULTS_SEARCH_15_PARAMETERS_DEFAULT_CHARGE_STATE_2_charge	3
RESULTS_SEARCH_15_PARAMETERS_DEFAULT_CHARGE_STATE_2_probability	1
RESULTS_SEARCH_15_PARAMETERS_DEFAULT_CHARGE_STATE_3_charge	4
RESULTS_SEARCH_15_PARAMETERS_DEFAULT_CHARGE_STATE_3_probability	1
RESULTS_SEARCH_15_PARAMETERS_VERSION	5.0.1.0, 4895
RESULTS_SEARCH_15_PARAMETERS_PARAGON_VERSION	5.0.1.0, 4874
RESULTS_SEARCH_15_PARAMETERS_APPLICATION	ProteinPilot(tm) Software
RESULTS_SEARCH_15_PARAMETERS_PROGROUP_alternativedispositionmaximumfoldprobabilitydrop	100
RESULTS_SEARCH_15_PARAMETERS_PROGROUP_alternativedispositionmaximumfoldscoredrop	2
RESULTS_SEARCH_15_PARAMETERS_PROGROUP_autodiscordantpeptidethreshold	0.3
RESULTS_SEARCH_15_PARAMETERS_PROGROUP_bayesconfidencecalclulation	TRUE
RESULTS_SEARCH_15_PARAMETERS_PROGROUP_calibrateconfidence	TRUE
RESULTS_SEARCH_15_PARAMETERS_PROGROUP_compresspeptides	FALSE
RESULTS_SEARCH_15_PARAMETERS_PROGROUP_confidencepercentthresholdforexcludingothersfromquant	15
RESULTS_SEARCH_15_PARAMETERS_PROGROUP_confidencepercentthresholdforincludingselfinquant	15
RESULTS_SEARCH_15_PARAMETERS_PROGROUP_donotstoremspeaklists	FALSE
RESULTS_SEARCH_15_PARAMETERS_PROGROUP_fasta	C:\AB SCIEX\ProteinPilot Data\SearchDatabases\uniprot-zebrafish_with_Clover.fasta
RESULTS_SEARCH_15_PARAMETERS_PROGROUP_featuregroupminpepconf	0.66
RESULTS_SEARCH_15_PARAMETERS_PROGROUP_featuregroupminups	0.47
RESULTS_SEARCH_15_PARAMETERS_PROGROUP_focusingintersection	4
RESULTS_SEARCH_15_PARAMETERS_PROGROUP_focusingminimummatchconfidence	0.1
RESULTS_SEARCH_15_PARAMETERS_PROGROUP_focusingminunusedprotscore	0.1
RESULTS_SEARCH_15_PARAMETERS_PROGROUP_focusingsubsetcutoff	6
RESULTS_SEARCH_15_PARAMETERS_PROGROUP_intersection	1.3
RESULTS_SEARCH_15_PARAMETERS_PROGROUP_minimummatchconfidencecutoff	0.001
RESULTS_SEARCH_15_PARAMETERS_PROGROUP_minunusedprotscore	0.0458
RESULTS_SEARCH_15_PARAMETERS_PROGROUP_subsetcutoff	2
RESULTS_SEARCH_15_PARAMETERS_PROGROUP_unusedprotscorethresholdforexcludingothersfromquant	1.3
RESULTS_SEARCH_15_PARAMETERS_PEAKLIST_count	2092
RESULTS_SEARCH_15_PARAMETERS_PEAKLIST_filenumber	6
RESULTS_SEARCH_15_PARAMETERS_PEAKLIST_original_count	2092
RESULTS_SEARCH_15_PARAMETERS_PEAKLIST_originalfilename	C:\AB SCIEX\ProteinPilot Data\Results\Albert\ZX 20200624 6600\ZX 20200624 C4B Control 6.wiff
RESULTS_SEARCH_15_PARAMETERS_PEAKLIST_partnumber	8
RESULTS_SEARCH_15_PARAMETERS_QUANT_TYPE_background_correction	FALSE
RESULTS_SEARCH_15_PARAMETERS_QUANT_TYPE_bias_correction	TRUE
RESULTS_SEARCH_15_PARAMETERS_QUANT_TYPE_keep_extreme_peptides_over_fraction	0
RESULTS_SEARCH_15_PARAMETERS_QUANT_TYPE_low_confidence_check	TRUE
RESULTS_SEARCH_15_PARAMETERS_QUANT_TYPE_low_intensity_check	TRUE
RESULTS_SEARCH_15_PARAMETERS_QUANT_TYPE_median_statistic	TRUE
RESULTS_SEARCH_15_PARAMETERS_QUANT_TYPE_mod_check	TRUE
RESULTS_SEARCH_15_PARAMETERS_QUANT_TYPE_quant_threshold	-1
RESULTS_SEARCH_15_PARAMETERS_QUANT_TYPE_quant_threshold_sn	9
RESULTS_SEARCH_15_PARAMETERS_QUANT_TYPE_separate_searches	FALSE
RESULTS_SEARCH_15_PARAMETERS_QUANT_TYPE_shared_msms_check	TRUE
RESULTS_SEARCH_15_PARAMETERS_PARAGON_METHOD_SETTINGS_UI_SAMPLE_TYPE	Identification
RESULTS_SEARCH_15_PARAMETERS_PARAGON_METHOD_SETTINGS_UI_CYS_ALKYLATION	Iodoacetamide w other Cys mods possible
RESULTS_SEARCH_15_PARAMETERS_PARAGON_METHOD_SETTINGS_UI_DIGESTION	Trypsin + Lys C
RESULTS_SEARCH_15_PARAMETERS_PARAGON_METHOD_SETTINGS_UI_SPECIAL_FACTOR	Gel-based ID
RESULTS_SEARCH_15_PARAMETERS_PARAGON_METHOD_SETTINGS_UI_INSTRUMENT	TripleTOF 6600
RESULTS_SEARCH_15_PARAMETERS_PARAGON_METHOD_SETTINGS_UI_SEARCH_EFFORT	Thorough
RESULTS_SEARCH_15_PARAMETERS_PARAGON_METHOD_SETTINGS_UI_USER_NAME	IMB-MASS02\massuser
RESULTS_SEARCH_15_PARAMETERS_PARAGON_METHOD_SETTINGS_UI_MACHINE_NAME	IMB-MASS02
RESULTS_SEARCH_15_PARAMETERS_PARAGON_METHOD_SETTINGS_UI_SEARCH_ID	6.37467e+17
RESULTS_SEARCH_15_PARAMETERS_PARAGON_METHOD_SETTINGS_UI_START_TIME	2021-01-19 16:12:40
RESULTS_SEARCH_15_PARAMETERS_PARAGON_METHOD_SETTINGS_UI_MIN_UNUSED_PROTSCORE	0.0458
RESULTS_SEARCH_15_PARAMETERS_PARAGON_METHOD_SETTINGS_UI_PSPEP	TRUE
RESULTS_SEARCH_16_time_cpu	322235
RESULTS_SEARCH_16_time_duration	322339
RESULTS_SEARCH_16_version	5.0.1.4874
RESULTS_SEARCH_16_xml:id	SEARCH:2:637466695384099484_7
RESULTS_SEARCH_16_PARAMETERS_chemical_data_edited	FALSE
RESULTS_SEARCH_16_PARAMETERS_do_multiprecursor_search	TRUE
RESULTS_SEARCH_16_PARAMETERS_do_reverse_search	TRUE
RESULTS_SEARCH_16_PARAMETERS_max_quant_labels	35
RESULTS_SEARCH_16_PARAMETERS_maxresults	15
RESULTS_SEARCH_16_PARAMETERS_separate_searches	FALSE
RESULTS_SEARCH_16_PARAMETERS_MSTOLERANCE_type	dalton
RESULTS_SEARCH_16_PARAMETERS_MSTOLERANCE_value	0.05
RESULTS_SEARCH_16_PARAMETERS_MSMSTOLERANCE_type	dalton
RESULTS_SEARCH_16_PARAMETERS_MSMSTOLERANCE_value	0.1
RESULTS_SEARCH_16_PARAMETERS_MS_STANDARD_DEVIATION_type	dalton
RESULTS_SEARCH_16_PARAMETERS_MS_STANDARD_DEVIATION_value	0.0011
RESULTS_SEARCH_16_PARAMETERS_MSMS_STANDARD_DEVIATION_type	dalton
RESULTS_SEARCH_16_PARAMETERS_MSMS_STANDARD_DEVIATION_value	0.01
RESULTS_SEARCH_16_PARAMETERS_FASTA_filename	C:\AB SCIEX\ProteinPilot Data\SearchDatabases\uniprot-zebrafish_with_Clover.fasta
RESULTS_SEARCH_16_PARAMETERS_AUTO_CALIBRATION_ms	TRUE
RESULTS_SEARCH_16_PARAMETERS_AUTO_CALIBRATION_msexport	FALSE
RESULTS_SEARCH_16_PARAMETERS_AUTO_CALIBRATION_msms	TRUE
RESULTS_SEARCH_16_PARAMETERS_AUTO_CALIBRATION_msmstolsdratio	2.75
RESULTS_SEARCH_16_PARAMETERS_AUTO_CALIBRATION_mstolsdratio	7
RESULTS_SEARCH_16_PARAMETERS_AUTO_CALIBRATION_squareroot	TRUE
RESULTS_SEARCH_16_PARAMETERS_AUTO_CALIBRATION_type	dalton
RESULTS_SEARCH_16_PARAMETERS_AUTO_CALIBRATION_MCP_d_s_s_f	0.0666667
RESULTS_SEARCH_16_PARAMETERS_AUTO_CALIBRATION_MCP_d_s_w_f	3
RESULTS_SEARCH_16_PARAMETERS_AUTO_CALIBRATION_MCP_m_f_r_mbc	200
RESULTS_SEARCH_16_PARAMETERS_AUTO_CALIBRATION_MCP_m_m_c	10
RESULTS_SEARCH_16_PARAMETERS_AUTO_CALIBRATION_MCP_m_m_f_s	0.25
RESULTS_SEARCH_16_PARAMETERS_AUTO_CALIBRATION_MCP_m_m_p_f	0.33
RESULTS_SEARCH_16_PARAMETERS_AUTO_CALIBRATION_MCP_m_m_p_rms_f	1
RESULTS_SEARCH_16_PARAMETERS_AUTO_CALIBRATION_MCP_m_p_t_f	1
RESULTS_SEARCH_16_PARAMETERS_AUTO_CALIBRATION_MCP_m_r_h_n_b	15
RESULTS_SEARCH_16_PARAMETERS_AUTO_CALIBRATION_MCP_m_z_n_s	99
RESULTS_SEARCH_16_PARAMETERS_AUTO_CALIBRATION_MCP_m_z_s_mn_f_r	0.0666667
RESULTS_SEARCH_16_PARAMETERS_AUTO_CALIBRATION_MCP_m_z_s_mx_f_r	0.1
RESULTS_SEARCH_16_PARAMETERS_MAX_PRECURSORS_FRAGLET	5
RESULTS_SEARCH_16_PARAMETERS_MAX_PRECURSORS_TAGLET	1
RESULTS_SEARCH_16_PARAMETERS_PRECURSORS_DR_FRAGLET	10
RESULTS_SEARCH_16_PARAMETERS_PRECURSORS_DR_TAGLET	3
RESULTS_SEARCH_16_PARAMETERS_DEFAULT_CHARGE_STATE_1_charge	2
RESULTS_SEARCH_16_PARAMETERS_DEFAULT_CHARGE_STATE_1_probability	1
RESULTS_SEARCH_16_PARAMETERS_DEFAULT_CHARGE_STATE_2_charge	3
RESULTS_SEARCH_16_PARAMETERS_DEFAULT_CHARGE_STATE_2_probability	1900-01-01
RESULTS_SEARCH_16_PARAMETERS_DEFAULT_CHARGE_STATE_3_charge	4
RESULTS_SEARCH_16_PARAMETERS_DEFAULT_CHARGE_STATE_3_probability	1
RESULTS_SEARCH_16_PARAMETERS_VERSION	5.0.1.0, 4895
RESULTS_SEARCH_16_PARAMETERS_PARAGON_VERSION	5.0.1.0, 4874
RESULTS_SEARCH_16_PARAMETERS_APPLICATION	ProteinPilot(tm) Software
RESULTS_SEARCH_16_PARAMETERS_PROGROUP_alternativedispositionmaximumfoldprobabilitydrop	100
RESULTS_SEARCH_16_PARAMETERS_PROGROUP_alternativedispositionmaximumfoldscoredrop	2
RESULTS_SEARCH_16_PARAMETERS_PROGROUP_autodiscordantpeptidethreshold	0.3
RESULTS_SEARCH_16_PARAMETERS_PROGROUP_bayesconfidencecalclulation	TRUE
RESULTS_SEARCH_16_PARAMETERS_PROGROUP_calibrateconfidence	TRUE
RESULTS_SEARCH_16_PARAMETERS_PROGROUP_compresspeptides	FALSE
RESULTS_SEARCH_16_PARAMETERS_PROGROUP_confidencepercentthresholdforexcludingothersfromquant	15
RESULTS_SEARCH_16_PARAMETERS_PROGROUP_confidencepercentthresholdforincludingselfinquant	15
RESULTS_SEARCH_16_PARAMETERS_PROGROUP_donotstoremspeaklists	FALSE
RESULTS_SEARCH_16_PARAMETERS_PROGROUP_fasta	C:\AB SCIEX\ProteinPilot Data\SearchDatabases\uniprot-zebrafish_with_Clover.fasta
RESULTS_SEARCH_16_PARAMETERS_PROGROUP_featuregroupminpepconf	0.66
RESULTS_SEARCH_16_PARAMETERS_PROGROUP_featuregroupminups	0.47
RESULTS_SEARCH_16_PARAMETERS_PROGROUP_focusingintersection	4
RESULTS_SEARCH_16_PARAMETERS_PROGROUP_focusingminimummatchconfidence	0.1
RESULTS_SEARCH_16_PARAMETERS_PROGROUP_focusingminunusedprotscore	0.1
RESULTS_SEARCH_16_PARAMETERS_PROGROUP_focusingsubsetcutoff	6
RESULTS_SEARCH_16_PARAMETERS_PROGROUP_intersection	1.3
RESULTS_SEARCH_16_PARAMETERS_PROGROUP_minimummatchconfidencecutoff	0.001
RESULTS_SEARCH_16_PARAMETERS_PROGROUP_minunusedprotscore	0.0458
RESULTS_SEARCH_16_PARAMETERS_PROGROUP_subsetcutoff	2
RESULTS_SEARCH_16_PARAMETERS_PROGROUP_unusedprotscorethresholdforexcludingothersfromquant	1.3
RESULTS_SEARCH_16_PARAMETERS_PEAKLIST_count	2092
RESULTS_SEARCH_16_PARAMETERS_PEAKLIST_filenumber	6
RESULTS_SEARCH_16_PARAMETERS_PEAKLIST_original_count	2092
RESULTS_SEARCH_16_PARAMETERS_PEAKLIST_originalfilename	C:\AB SCIEX\ProteinPilot Data\Results\Albert\ZX 20200624 6600\ZX 20200624 C4B Control 6.wiff
RESULTS_SEARCH_16_PARAMETERS_PEAKLIST_partnumber	8
RESULTS_SEARCH_16_PARAMETERS_QUANT_TYPE_background_correction	FALSE
RESULTS_SEARCH_16_PARAMETERS_QUANT_TYPE_bias_correction	TRUE
RESULTS_SEARCH_16_PARAMETERS_QUANT_TYPE_keep_extreme_peptides_over_fraction	0
RESULTS_SEARCH_16_PARAMETERS_QUANT_TYPE_low_confidence_check	TRUE
RESULTS_SEARCH_16_PARAMETERS_QUANT_TYPE_low_intensity_check	TRUE
RESULTS_SEARCH_16_PARAMETERS_QUANT_TYPE_median_statistic	TRUE
RESULTS_SEARCH_16_PARAMETERS_QUANT_TYPE_mod_check	TRUE
RESULTS_SEARCH_16_PARAMETERS_QUANT_TYPE_quant_threshold	-1
RESULTS_SEARCH_16_PARAMETERS_QUANT_TYPE_quant_threshold_sn	9
RESULTS_SEARCH_16_PARAMETERS_QUANT_TYPE_separate_searches	FALSE
RESULTS_SEARCH_16_PARAMETERS_QUANT_TYPE_shared_msms_check	TRUE
RESULTS_SEARCH_16_PARAMETERS_PARAGON_METHOD_SETTINGS_UI_SAMPLE_TYPE	Identification
RESULTS_SEARCH_16_PARAMETERS_PARAGON_METHOD_SETTINGS_UI_CYS_ALKYLATION	Iodoacetamide w other Cys mods possible
RESULTS_SEARCH_16_PARAMETERS_PARAGON_METHOD_SETTINGS_UI_DIGESTION	Trypsin + Lys C
RESULTS_SEARCH_16_PARAMETERS_PARAGON_METHOD_SETTINGS_UI_SPECIAL_FACTOR	Gel-based ID
RESULTS_SEARCH_16_PARAMETERS_PARAGON_METHOD_SETTINGS_UI_INSTRUMENT	TripleTOF 6600
RESULTS_SEARCH_16_PARAMETERS_PARAGON_METHOD_SETTINGS_UI_SEARCH_EFFORT	Thorough
RESULTS_SEARCH_16_PARAMETERS_PARAGON_METHOD_SETTINGS_UI_USER_NAME	IMB-MASS02\massuser
RESULTS_SEARCH_16_PARAMETERS_PARAGON_METHOD_SETTINGS_UI_MACHINE_NAME	IMB-MASS02
RESULTS_SEARCH_16_PARAMETERS_PARAGON_METHOD_SETTINGS_UI_SEARCH_ID	6.37467e+17
RESULTS_SEARCH_16_PARAMETERS_PARAGON_METHOD_SETTINGS_UI_START_TIME	2021-01-19 16:12:40
RESULTS_SEARCH_16_PARAMETERS_PARAGON_METHOD_SETTINGS_UI_MIN_UNUSED_PROTSCORE	0.0458
RESULTS_SEARCH_16_PARAMETERS_PARAGON_METHOD_SETTINGS_UI_PSPEP	TRUE
RESULTS_SEARCH_17_time_cpu	250381
RESULTS_SEARCH_17_time_duration	254305
RESULTS_SEARCH_17_version	5.0.1.4874
RESULTS_SEARCH_17_xml:id	SEARCH:1:637466695384099484_8
RESULTS_SEARCH_17_PARAMETERS_chemical_data_edited	FALSE
RESULTS_SEARCH_17_PARAMETERS_do_multiprecursor_search	TRUE
RESULTS_SEARCH_17_PARAMETERS_do_reverse_search	TRUE
RESULTS_SEARCH_17_PARAMETERS_max_quant_labels	35
RESULTS_SEARCH_17_PARAMETERS_maxresults	15
RESULTS_SEARCH_17_PARAMETERS_separate_searches	FALSE
RESULTS_SEARCH_17_PARAMETERS_MSTOLERANCE_type	dalton
RESULTS_SEARCH_17_PARAMETERS_MSTOLERANCE_value	0.05
RESULTS_SEARCH_17_PARAMETERS_MSMSTOLERANCE_type	dalton
RESULTS_SEARCH_17_PARAMETERS_MSMSTOLERANCE_value	0.1
RESULTS_SEARCH_17_PARAMETERS_MS_STANDARD_DEVIATION_type	dalton
RESULTS_SEARCH_17_PARAMETERS_MS_STANDARD_DEVIATION_value	0.0011
RESULTS_SEARCH_17_PARAMETERS_MSMS_STANDARD_DEVIATION_type	dalton
RESULTS_SEARCH_17_PARAMETERS_MSMS_STANDARD_DEVIATION_value	0.01
RESULTS_SEARCH_17_PARAMETERS_FASTA_filename	C:\AB SCIEX\ProteinPilot Data\SearchDatabases\uniprot-zebrafish_with_Clover.fasta
RESULTS_SEARCH_17_PARAMETERS_AUTO_CALIBRATION_ms	TRUE
RESULTS_SEARCH_17_PARAMETERS_AUTO_CALIBRATION_msexport	FALSE
RESULTS_SEARCH_17_PARAMETERS_AUTO_CALIBRATION_msms	TRUE
RESULTS_SEARCH_17_PARAMETERS_AUTO_CALIBRATION_msmstolsdratio	2.75
RESULTS_SEARCH_17_PARAMETERS_AUTO_CALIBRATION_mstolsdratio	7
RESULTS_SEARCH_17_PARAMETERS_AUTO_CALIBRATION_squareroot	TRUE
RESULTS_SEARCH_17_PARAMETERS_AUTO_CALIBRATION_type	dalton
RESULTS_SEARCH_17_PARAMETERS_AUTO_CALIBRATION_MCP_d_s_s_f	0.0666667
RESULTS_SEARCH_17_PARAMETERS_AUTO_CALIBRATION_MCP_d_s_w_f	3
RESULTS_SEARCH_17_PARAMETERS_AUTO_CALIBRATION_MCP_m_f_r_mbc	200
RESULTS_SEARCH_17_PARAMETERS_AUTO_CALIBRATION_MCP_m_m_c	10
RESULTS_SEARCH_17_PARAMETERS_AUTO_CALIBRATION_MCP_m_m_f_s	0.25
RESULTS_SEARCH_17_PARAMETERS_AUTO_CALIBRATION_MCP_m_m_p_f	0.33
RESULTS_SEARCH_17_PARAMETERS_AUTO_CALIBRATION_MCP_m_m_p_rms_f	1
RESULTS_SEARCH_17_PARAMETERS_AUTO_CALIBRATION_MCP_m_p_t_f	1
RESULTS_SEARCH_17_PARAMETERS_AUTO_CALIBRATION_MCP_m_r_h_n_b	15
RESULTS_SEARCH_17_PARAMETERS_AUTO_CALIBRATION_MCP_m_z_n_s	99
RESULTS_SEARCH_17_PARAMETERS_AUTO_CALIBRATION_MCP_m_z_s_mn_f_r	0.0666667
RESULTS_SEARCH_17_PARAMETERS_AUTO_CALIBRATION_MCP_m_z_s_mx_f_r	0.1
RESULTS_SEARCH_17_PARAMETERS_MAX_PRECURSORS_FRAGLET	5
RESULTS_SEARCH_17_PARAMETERS_MAX_PRECURSORS_TAGLET	1
RESULTS_SEARCH_17_PARAMETERS_PRECURSORS_DR_FRAGLET	10
RESULTS_SEARCH_17_PARAMETERS_PRECURSORS_DR_TAGLET	3
RESULTS_SEARCH_17_PARAMETERS_DEFAULT_CHARGE_STATE_1_charge	2
RESULTS_SEARCH_17_PARAMETERS_DEFAULT_CHARGE_STATE_1_probability	1
RESULTS_SEARCH_17_PARAMETERS_DEFAULT_CHARGE_STATE_2_charge	1900-01-03
RESULTS_SEARCH_17_PARAMETERS_DEFAULT_CHARGE_STATE_2_probability	1
RESULTS_SEARCH_17_PARAMETERS_DEFAULT_CHARGE_STATE_3_charge	4
RESULTS_SEARCH_17_PARAMETERS_DEFAULT_CHARGE_STATE_3_probability	1
RESULTS_SEARCH_17_PARAMETERS_VERSION	5.0.1.0, 4895
RESULTS_SEARCH_17_PARAMETERS_PARAGON_VERSION	5.0.1.0, 4874
RESULTS_SEARCH_17_PARAMETERS_APPLICATION	ProteinPilot(tm) Software
RESULTS_SEARCH_17_PARAMETERS_PROGROUP_alternativedispositionmaximumfoldprobabilitydrop	100
RESULTS_SEARCH_17_PARAMETERS_PROGROUP_alternativedispositionmaximumfoldscoredrop	2
RESULTS_SEARCH_17_PARAMETERS_PROGROUP_autodiscordantpeptidethreshold	0.3
RESULTS_SEARCH_17_PARAMETERS_PROGROUP_bayesconfidencecalclulation	TRUE
RESULTS_SEARCH_17_PARAMETERS_PROGROUP_calibrateconfidence	TRUE
RESULTS_SEARCH_17_PARAMETERS_PROGROUP_compresspeptides	FALSE
RESULTS_SEARCH_17_PARAMETERS_PROGROUP_confidencepercentthresholdforexcludingothersfromquant	15
RESULTS_SEARCH_17_PARAMETERS_PROGROUP_confidencepercentthresholdforincludingselfinquant	15
RESULTS_SEARCH_17_PARAMETERS_PROGROUP_donotstoremspeaklists	FALSE
RESULTS_SEARCH_17_PARAMETERS_PROGROUP_fasta	C:\AB SCIEX\ProteinPilot Data\SearchDatabases\uniprot-zebrafish_with_Clover.fasta
RESULTS_SEARCH_17_PARAMETERS_PROGROUP_featuregroupminpepconf	0.66
RESULTS_SEARCH_17_PARAMETERS_PROGROUP_featuregroupminups	0.47
RESULTS_SEARCH_17_PARAMETERS_PROGROUP_focusingintersection	4
RESULTS_SEARCH_17_PARAMETERS_PROGROUP_focusingminimummatchconfidence	0.1
RESULTS_SEARCH_17_PARAMETERS_PROGROUP_focusingminunusedprotscore	0.1
RESULTS_SEARCH_17_PARAMETERS_PROGROUP_focusingsubsetcutoff	6
RESULTS_SEARCH_17_PARAMETERS_PROGROUP_intersection	1.3
RESULTS_SEARCH_17_PARAMETERS_PROGROUP_minimummatchconfidencecutoff	0.001
RESULTS_SEARCH_17_PARAMETERS_PROGROUP_minunusedprotscore	0.0458
RESULTS_SEARCH_17_PARAMETERS_PROGROUP_subsetcutoff	2
RESULTS_SEARCH_17_PARAMETERS_PROGROUP_unusedprotscorethresholdforexcludingothersfromquant	1.3
RESULTS_SEARCH_17_PARAMETERS_PEAKLIST_count	2254
RESULTS_SEARCH_17_PARAMETERS_PEAKLIST_filenumber	7
RESULTS_SEARCH_17_PARAMETERS_PEAKLIST_original_count	1906-03-03
RESULTS_SEARCH_17_PARAMETERS_PEAKLIST_originalfilename	C:\AB SCIEX\ProteinPilot Data\Results\Albert\ZX 20200624 6600\ZX 20200624 C4B Control 7.wiff
RESULTS_SEARCH_17_PARAMETERS_PEAKLIST_partnumber	9
RESULTS_SEARCH_17_PARAMETERS_QUANT_TYPE_background_correction	FALSE
RESULTS_SEARCH_17_PARAMETERS_QUANT_TYPE_bias_correction	TRUE
RESULTS_SEARCH_17_PARAMETERS_QUANT_TYPE_keep_extreme_peptides_over_fraction	0
RESULTS_SEARCH_17_PARAMETERS_QUANT_TYPE_low_confidence_check	TRUE
RESULTS_SEARCH_17_PARAMETERS_QUANT_TYPE_low_intensity_check	TRUE
RESULTS_SEARCH_17_PARAMETERS_QUANT_TYPE_median_statistic	TRUE
RESULTS_SEARCH_17_PARAMETERS_QUANT_TYPE_mod_check	TRUE
RESULTS_SEARCH_17_PARAMETERS_QUANT_TYPE_quant_threshold	-1
RESULTS_SEARCH_17_PARAMETERS_QUANT_TYPE_quant_threshold_sn	1900-01-09
RESULTS_SEARCH_17_PARAMETERS_QUANT_TYPE_separate_searches	FALSE
RESULTS_SEARCH_17_PARAMETERS_QUANT_TYPE_shared_msms_check	TRUE
RESULTS_SEARCH_17_PARAMETERS_PARAGON_METHOD_SETTINGS_UI_SAMPLE_TYPE	Identification
RESULTS_SEARCH_17_PARAMETERS_PARAGON_METHOD_SETTINGS_UI_CYS_ALKYLATION	Iodoacetamide w other Cys mods possible
RESULTS_SEARCH_17_PARAMETERS_PARAGON_METHOD_SETTINGS_UI_DIGESTION	Trypsin + Lys C
RESULTS_SEARCH_17_PARAMETERS_PARAGON_METHOD_SETTINGS_UI_SPECIAL_FACTOR	Gel-based ID
RESULTS_SEARCH_17_PARAMETERS_PARAGON_METHOD_SETTINGS_UI_INSTRUMENT	TripleTOF 6600
RESULTS_SEARCH_17_PARAMETERS_PARAGON_METHOD_SETTINGS_UI_SEARCH_EFFORT	Thorough
RESULTS_SEARCH_17_PARAMETERS_PARAGON_METHOD_SETTINGS_UI_USER_NAME	IMB-MASS02\massuser
RESULTS_SEARCH_17_PARAMETERS_PARAGON_METHOD_SETTINGS_UI_MACHINE_NAME	IMB-MASS02
RESULTS_SEARCH_17_PARAMETERS_PARAGON_METHOD_SETTINGS_UI_SEARCH_ID	6.37467e+17
RESULTS_SEARCH_17_PARAMETERS_PARAGON_METHOD_SETTINGS_UI_START_TIME	2021-01-19 16:12:40
RESULTS_SEARCH_17_PARAMETERS_PARAGON_METHOD_SETTINGS_UI_MIN_UNUSED_PROTSCORE	0.0458
RESULTS_SEARCH_17_PARAMETERS_PARAGON_METHOD_SETTINGS_UI_PSPEP	TRUE
RESULTS_SEARCH_18_time_cpu	359067
RESULTS_SEARCH_18_time_duration	359281
RESULTS_SEARCH_18_version	5.0.1.4874
RESULTS_SEARCH_18_xml:id	SEARCH:2:637466695384099484_8
RESULTS_SEARCH_18_PARAMETERS_chemical_data_edited	FALSE
RESULTS_SEARCH_18_PARAMETERS_do_multiprecursor_search	TRUE
RESULTS_SEARCH_18_PARAMETERS_do_reverse_search	TRUE
RESULTS_SEARCH_18_PARAMETERS_max_quant_labels	35
RESULTS_SEARCH_18_PARAMETERS_maxresults	15
RESULTS_SEARCH_18_PARAMETERS_separate_searches	FALSE
RESULTS_SEARCH_18_PARAMETERS_MSTOLERANCE_type	dalton
RESULTS_SEARCH_18_PARAMETERS_MSTOLERANCE_value	0.05
RESULTS_SEARCH_18_PARAMETERS_MSMSTOLERANCE_type	dalton
RESULTS_SEARCH_18_PARAMETERS_MSMSTOLERANCE_value	0.1
RESULTS_SEARCH_18_PARAMETERS_MS_STANDARD_DEVIATION_type	dalton
RESULTS_SEARCH_18_PARAMETERS_MS_STANDARD_DEVIATION_value	0.0011
RESULTS_SEARCH_18_PARAMETERS_MSMS_STANDARD_DEVIATION_type	dalton
RESULTS_SEARCH_18_PARAMETERS_MSMS_STANDARD_DEVIATION_value	0.01
RESULTS_SEARCH_18_PARAMETERS_FASTA_filename	C:\AB SCIEX\ProteinPilot Data\SearchDatabases\uniprot-zebrafish_with_Clover.fasta
RESULTS_SEARCH_18_PARAMETERS_AUTO_CALIBRATION_ms	TRUE
RESULTS_SEARCH_18_PARAMETERS_AUTO_CALIBRATION_msexport	FALSE
RESULTS_SEARCH_18_PARAMETERS_AUTO_CALIBRATION_msms	TRUE
RESULTS_SEARCH_18_PARAMETERS_AUTO_CALIBRATION_msmstolsdratio	2.75
RESULTS_SEARCH_18_PARAMETERS_AUTO_CALIBRATION_mstolsdratio	7
RESULTS_SEARCH_18_PARAMETERS_AUTO_CALIBRATION_squareroot	TRUE
RESULTS_SEARCH_18_PARAMETERS_AUTO_CALIBRATION_type	dalton
RESULTS_SEARCH_18_PARAMETERS_AUTO_CALIBRATION_MCP_d_s_s_f	0.0666667
RESULTS_SEARCH_18_PARAMETERS_AUTO_CALIBRATION_MCP_d_s_w_f	3
RESULTS_SEARCH_18_PARAMETERS_AUTO_CALIBRATION_MCP_m_f_r_mbc	200
RESULTS_SEARCH_18_PARAMETERS_AUTO_CALIBRATION_MCP_m_m_c	10
RESULTS_SEARCH_18_PARAMETERS_AUTO_CALIBRATION_MCP_m_m_f_s	0.25
RESULTS_SEARCH_18_PARAMETERS_AUTO_CALIBRATION_MCP_m_m_p_f	0.33
RESULTS_SEARCH_18_PARAMETERS_AUTO_CALIBRATION_MCP_m_m_p_rms_f	1
RESULTS_SEARCH_18_PARAMETERS_AUTO_CALIBRATION_MCP_m_p_t_f	1
RESULTS_SEARCH_18_PARAMETERS_AUTO_CALIBRATION_MCP_m_r_h_n_b	15
RESULTS_SEARCH_18_PARAMETERS_AUTO_CALIBRATION_MCP_m_z_n_s	99
RESULTS_SEARCH_18_PARAMETERS_AUTO_CALIBRATION_MCP_m_z_s_mn_f_r	0.0666667
RESULTS_SEARCH_18_PARAMETERS_AUTO_CALIBRATION_MCP_m_z_s_mx_f_r	0.1
RESULTS_SEARCH_18_PARAMETERS_MAX_PRECURSORS_FRAGLET	5
RESULTS_SEARCH_18_PARAMETERS_MAX_PRECURSORS_TAGLET	1
RESULTS_SEARCH_18_PARAMETERS_PRECURSORS_DR_FRAGLET	10
RESULTS_SEARCH_18_PARAMETERS_PRECURSORS_DR_TAGLET	3
RESULTS_SEARCH_18_PARAMETERS_DEFAULT_CHARGE_STATE_1_charge	2
RESULTS_SEARCH_18_PARAMETERS_DEFAULT_CHARGE_STATE_1_probability	1
RESULTS_SEARCH_18_PARAMETERS_DEFAULT_CHARGE_STATE_2_charge	3
RESULTS_SEARCH_18_PARAMETERS_DEFAULT_CHARGE_STATE_2_probability	1
RESULTS_SEARCH_18_PARAMETERS_DEFAULT_CHARGE_STATE_3_charge	4
RESULTS_SEARCH_18_PARAMETERS_DEFAULT_CHARGE_STATE_3_probability	1
RESULTS_SEARCH_18_PARAMETERS_VERSION	5.0.1.0, 4895
RESULTS_SEARCH_18_PARAMETERS_PARAGON_VERSION	5.0.1.0, 4874
RESULTS_SEARCH_18_PARAMETERS_APPLICATION	ProteinPilot(tm) Software
RESULTS_SEARCH_18_PARAMETERS_PROGROUP_alternativedispositionmaximumfoldprobabilitydrop	100
RESULTS_SEARCH_18_PARAMETERS_PROGROUP_alternativedispositionmaximumfoldscoredrop	2
RESULTS_SEARCH_18_PARAMETERS_PROGROUP_autodiscordantpeptidethreshold	0.3
RESULTS_SEARCH_18_PARAMETERS_PROGROUP_bayesconfidencecalclulation	TRUE
RESULTS_SEARCH_18_PARAMETERS_PROGROUP_calibrateconfidence	TRUE
RESULTS_SEARCH_18_PARAMETERS_PROGROUP_compresspeptides	FALSE
RESULTS_SEARCH_18_PARAMETERS_PROGROUP_confidencepercentthresholdforexcludingothersfromquant	15
RESULTS_SEARCH_18_PARAMETERS_PROGROUP_confidencepercentthresholdforincludingselfinquant	15
RESULTS_SEARCH_18_PARAMETERS_PROGROUP_donotstoremspeaklists	FALSE
RESULTS_SEARCH_18_PARAMETERS_PROGROUP_fasta	C:\AB SCIEX\ProteinPilot Data\SearchDatabases\uniprot-zebrafish_with_Clover.fasta
RESULTS_SEARCH_18_PARAMETERS_PROGROUP_featuregroupminpepconf	15:50:24
RESULTS_SEARCH_18_PARAMETERS_PROGROUP_featuregroupminups	0.47
RESULTS_SEARCH_18_PARAMETERS_PROGROUP_focusingintersection	4
RESULTS_SEARCH_18_PARAMETERS_PROGROUP_focusingminimummatchconfidence	0.1
RESULTS_SEARCH_18_PARAMETERS_PROGROUP_focusingminunusedprotscore	0.1
RESULTS_SEARCH_18_PARAMETERS_PROGROUP_focusingsubsetcutoff	6
RESULTS_SEARCH_18_PARAMETERS_PROGROUP_intersection	1.3
RESULTS_SEARCH_18_PARAMETERS_PROGROUP_minimummatchconfidencecutoff	0.001
RESULTS_SEARCH_18_PARAMETERS_PROGROUP_minunusedprotscore	0.0458
RESULTS_SEARCH_18_PARAMETERS_PROGROUP_subsetcutoff	2
RESULTS_SEARCH_18_PARAMETERS_PROGROUP_unusedprotscorethresholdforexcludingothersfromquant	1.3
RESULTS_SEARCH_18_PARAMETERS_PEAKLIST_count	2254
RESULTS_SEARCH_18_PARAMETERS_PEAKLIST_filenumber	7
RESULTS_SEARCH_18_PARAMETERS_PEAKLIST_original_count	2254
RESULTS_SEARCH_18_PARAMETERS_PEAKLIST_originalfilename	C:\AB SCIEX\ProteinPilot Data\Results\Albert\ZX 20200624 6600\ZX 20200624 C4B Control 7.wiff
RESULTS_SEARCH_18_PARAMETERS_PEAKLIST_partnumber	9
RESULTS_SEARCH_18_PARAMETERS_QUANT_TYPE_background_correction	FALSE
RESULTS_SEARCH_18_PARAMETERS_QUANT_TYPE_bias_correction	TRUE
RESULTS_SEARCH_18_PARAMETERS_QUANT_TYPE_keep_extreme_peptides_over_fraction	0
RESULTS_SEARCH_18_PARAMETERS_QUANT_TYPE_low_confidence_check	TRUE
RESULTS_SEARCH_18_PARAMETERS_QUANT_TYPE_low_intensity_check	TRUE
RESULTS_SEARCH_18_PARAMETERS_QUANT_TYPE_median_statistic	TRUE
RESULTS_SEARCH_18_PARAMETERS_QUANT_TYPE_mod_check	TRUE
RESULTS_SEARCH_18_PARAMETERS_QUANT_TYPE_quant_threshold	-1
RESULTS_SEARCH_18_PARAMETERS_QUANT_TYPE_quant_threshold_sn	9
RESULTS_SEARCH_18_PARAMETERS_QUANT_TYPE_separate_searches	FALSE
RESULTS_SEARCH_18_PARAMETERS_QUANT_TYPE_shared_msms_check	TRUE
RESULTS_SEARCH_18_PARAMETERS_PARAGON_METHOD_SETTINGS_UI_SAMPLE_TYPE	Identification
RESULTS_SEARCH_18_PARAMETERS_PARAGON_METHOD_SETTINGS_UI_CYS_ALKYLATION	Iodoacetamide w other Cys mods possible
RESULTS_SEARCH_18_PARAMETERS_PARAGON_METHOD_SETTINGS_UI_DIGESTION	Trypsin + Lys C
RESULTS_SEARCH_18_PARAMETERS_PARAGON_METHOD_SETTINGS_UI_SPECIAL_FACTOR	Gel-based ID
RESULTS_SEARCH_18_PARAMETERS_PARAGON_METHOD_SETTINGS_UI_INSTRUMENT	TripleTOF 6600
RESULTS_SEARCH_18_PARAMETERS_PARAGON_METHOD_SETTINGS_UI_SEARCH_EFFORT	Thorough
RESULTS_SEARCH_18_PARAMETERS_PARAGON_METHOD_SETTINGS_UI_USER_NAME	IMB-MASS02\massuser
RESULTS_SEARCH_18_PARAMETERS_PARAGON_METHOD_SETTINGS_UI_MACHINE_NAME	IMB-MASS02
RESULTS_SEARCH_18_PARAMETERS_PARAGON_METHOD_SETTINGS_UI_SEARCH_ID	6.37467e+17
RESULTS_SEARCH_18_PARAMETERS_PARAGON_METHOD_SETTINGS_UI_START_TIME	2021-01-19 16:12:40
RESULTS_SEARCH_18_PARAMETERS_PARAGON_METHOD_SETTINGS_UI_MIN_UNUSED_PROTSCORE	0.0458
RESULTS_SEARCH_18_PARAMETERS_PARAGON_METHOD_SETTINGS_UI_PSPEP	TRUE
RESULTS_SEARCH_19_time_cpu	73850
RESULTS_SEARCH_19_time_duration	75974
RESULTS_SEARCH_19_version	5.0.1.4874
RESULTS_SEARCH_19_xml:id	SEARCH:1:637466695384099484_9
RESULTS_SEARCH_19_PARAMETERS_chemical_data_edited	FALSE
RESULTS_SEARCH_19_PARAMETERS_do_multiprecursor_search	TRUE
RESULTS_SEARCH_19_PARAMETERS_do_reverse_search	TRUE
RESULTS_SEARCH_19_PARAMETERS_max_quant_labels	35
RESULTS_SEARCH_19_PARAMETERS_maxresults	15
RESULTS_SEARCH_19_PARAMETERS_separate_searches	FALSE
RESULTS_SEARCH_19_PARAMETERS_MSTOLERANCE_type	dalton
RESULTS_SEARCH_19_PARAMETERS_MSTOLERANCE_value	0.05
RESULTS_SEARCH_19_PARAMETERS_MSMSTOLERANCE_type	dalton
RESULTS_SEARCH_19_PARAMETERS_MSMSTOLERANCE_value	0.1
RESULTS_SEARCH_19_PARAMETERS_MS_STANDARD_DEVIATION_type	dalton
RESULTS_SEARCH_19_PARAMETERS_MS_STANDARD_DEVIATION_value	0.0011
RESULTS_SEARCH_19_PARAMETERS_MSMS_STANDARD_DEVIATION_type	dalton
RESULTS_SEARCH_19_PARAMETERS_MSMS_STANDARD_DEVIATION_value	0.01
RESULTS_SEARCH_19_PARAMETERS_FASTA_filename	C:\AB SCIEX\ProteinPilot Data\SearchDatabases\uniprot-zebrafish_with_Clover.fasta
RESULTS_SEARCH_19_PARAMETERS_AUTO_CALIBRATION_ms	TRUE
RESULTS_SEARCH_19_PARAMETERS_AUTO_CALIBRATION_msexport	FALSE
RESULTS_SEARCH_19_PARAMETERS_AUTO_CALIBRATION_msms	TRUE
RESULTS_SEARCH_19_PARAMETERS_AUTO_CALIBRATION_msmstolsdratio	2.75
RESULTS_SEARCH_19_PARAMETERS_AUTO_CALIBRATION_mstolsdratio	7
RESULTS_SEARCH_19_PARAMETERS_AUTO_CALIBRATION_squareroot	TRUE
RESULTS_SEARCH_19_PARAMETERS_AUTO_CALIBRATION_type	dalton
RESULTS_SEARCH_19_PARAMETERS_AUTO_CALIBRATION_MCP_d_s_s_f	0.0666667
RESULTS_SEARCH_19_PARAMETERS_AUTO_CALIBRATION_MCP_d_s_w_f	3
RESULTS_SEARCH_19_PARAMETERS_AUTO_CALIBRATION_MCP_m_f_r_mbc	200
RESULTS_SEARCH_19_PARAMETERS_AUTO_CALIBRATION_MCP_m_m_c	10
RESULTS_SEARCH_19_PARAMETERS_AUTO_CALIBRATION_MCP_m_m_f_s	0.25
RESULTS_SEARCH_19_PARAMETERS_AUTO_CALIBRATION_MCP_m_m_p_f	0.33
RESULTS_SEARCH_19_PARAMETERS_AUTO_CALIBRATION_MCP_m_m_p_rms_f	1
RESULTS_SEARCH_19_PARAMETERS_AUTO_CALIBRATION_MCP_m_p_t_f	1
RESULTS_SEARCH_19_PARAMETERS_AUTO_CALIBRATION_MCP_m_r_h_n_b	15
RESULTS_SEARCH_19_PARAMETERS_AUTO_CALIBRATION_MCP_m_z_n_s	99
RESULTS_SEARCH_19_PARAMETERS_AUTO_CALIBRATION_MCP_m_z_s_mn_f_r	0.0666667
RESULTS_SEARCH_19_PARAMETERS_AUTO_CALIBRATION_MCP_m_z_s_mx_f_r	0.1
RESULTS_SEARCH_19_PARAMETERS_MS_AUTO_CALIBRATION_OUT_avres	-8.96606e-11
RESULTS_SEARCH_19_PARAMETERS_MS_AUTO_CALIBRATION_OUT_c0	-0.000176951
RESULTS_SEARCH_19_PARAMETERS_MS_AUTO_CALIBRATION_OUT_c1minus1	5.01589e-06
RESULTS_SEARCH_19_PARAMETERS_MS_AUTO_CALIBRATION_OUT_c2	0
RESULTS_SEARCH_19_PARAMETERS_MS_AUTO_CALIBRATION_OUT_file	8
RESULTS_SEARCH_19_PARAMETERS_MS_AUTO_CALIBRATION_OUT_partnumber	10
RESULTS_SEARCH_19_PARAMETERS_MS_AUTO_CALIBRATION_OUT_polyorder	1
RESULTS_SEARCH_19_PARAMETERS_MS_AUTO_CALIBRATION_OUT_sample	1
RESULTS_SEARCH_19_PARAMETERS_MS_AUTO_CALIBRATION_OUT_squareroot	TRUE
RESULTS_SEARCH_19_PARAMETERS_MSMS_AUTO_CALIBRATION_OUT_avres	-2.16057e-08
RESULTS_SEARCH_19_PARAMETERS_MSMS_AUTO_CALIBRATION_OUT_c0	-2.04397e-05
RESULTS_SEARCH_19_PARAMETERS_MSMS_AUTO_CALIBRATION_OUT_c1minus1	-1.72364e-06
RESULTS_SEARCH_19_PARAMETERS_MSMS_AUTO_CALIBRATION_OUT_c2	0
RESULTS_SEARCH_19_PARAMETERS_MSMS_AUTO_CALIBRATION_OUT_file	8
[truncated: 9,868 more rows]

## Sheet: Metadata Calculations
	Subsearch	Search string	present		File index down	Part number	Spectra - 'original'	Spectra 'count' - non-empty?	max original Spectra for part	Max non-empty spectra for part	File Index for first only
	1	RESULTS_SEARCH_1_PARAMETERS_PEAKLIST_rawdatafilename		C:\AB SCIEX\ProteinPilot Data\Results\Albert\ZX 20200624 6600\ZX 20200624 C4B Control 1.wiff	1	1	2069	2069	2069	2069	1
	2	RESULTS_SEARCH_2_PARAMETERS_PEAKLIST_rawdatafilename		C:\AB SCIEX\ProteinPilot Data\Results\Albert\ZX 20200624 6600\ZX 20200624 C4B Control 1.wiff	1	1	2069	2069
	3	RESULTS_SEARCH_3_PARAMETERS_PEAKLIST_rawdatafilename		C:\AB SCIEX\ProteinPilot Data\Results\Albert\ZX 20200624 6600\ZX 20200624 C4B Control 2.wiff	2	2	1971	1971	1971	1971	2
1 if Rapid, 2 if Thor	4	RESULTS_SEARCH_4_PARAMETERS_PEAKLIST_rawdatafilename		C:\AB SCIEX\ProteinPilot Data\Results\Albert\ZX 20200624 6600\ZX 20200624 C4B Control 2.wiff	2	2	1971	1971
2	5	RESULTS_SEARCH_5_PARAMETERS_PEAKLIST_rawdatafilename		C:\AB SCIEX\ProteinPilot Data\Results\Albert\ZX 20200624 6600\ZX 20200624 C4B Control 3.wiff	3	3	2899	2899	2899	2899	3
	6	RESULTS_SEARCH_6_PARAMETERS_PEAKLIST_rawdatafilename		C:\AB SCIEX\ProteinPilot Data\Results\Albert\ZX 20200624 6600\ZX 20200624 C4B Control 3.wiff	3	3	2899	2899
# Segments	7	RESULTS_SEARCH_7_PARAMETERS_PEAKLIST_rawdatafilename		C:\AB SCIEX\ProteinPilot Data\Results\Albert\ZX 20200624 6600\ZX 20200624 C4B Control 3.wiff	3	4	2901	2901	2901	2901
108	8	RESULTS_SEARCH_8_PARAMETERS_PEAKLIST_rawdatafilename		C:\AB SCIEX\ProteinPilot Data\Results\Albert\ZX 20200624 6600\ZX 20200624 C4B Control 3.wiff	3	4	2901	2901
(max is 1000 segments)	9	RESULTS_SEARCH_9_PARAMETERS_PEAKLIST_rawdatafilename		C:\AB SCIEX\ProteinPilot Data\Results\Albert\ZX 20200624 6600\ZX 20200624 C4B Control 3.wiff	3	5	2886	2886	2886	2886
	10	RESULTS_SEARCH_10_PARAMETERS_PEAKLIST_rawdatafilename		C:\AB SCIEX\ProteinPilot Data\Results\Albert\ZX 20200624 6600\ZX 20200624 C4B Control 3.wiff	3	5	2886	2886
	11	RESULTS_SEARCH_11_PARAMETERS_PEAKLIST_rawdatafilename		C:\AB SCIEX\ProteinPilot Data\Results\Albert\ZX 20200624 6600\ZX 20200624 C4B Control 4.wiff	4	6	2059	2059	2059	2059	4
	12	RESULTS_SEARCH_12_PARAMETERS_PEAKLIST_rawdatafilename		C:\AB SCIEX\ProteinPilot Data\Results\Albert\ZX 20200624 6600\ZX 20200624 C4B Control 4.wiff	4	6	2059	2059
	13	RESULTS_SEARCH_13_PARAMETERS_PEAKLIST_rawdatafilename		C:\AB SCIEX\ProteinPilot Data\Results\Albert\ZX 20200624 6600\ZX 20200624 C4B Control 5.wiff	5	7	1793	1793	1793	1793	5
	14	RESULTS_SEARCH_14_PARAMETERS_PEAKLIST_rawdatafilename		C:\AB SCIEX\ProteinPilot Data\Results\Albert\ZX 20200624 6600\ZX 20200624 C4B Control 5.wiff	5	7	1793	1793
	15	RESULTS_SEARCH_15_PARAMETERS_PEAKLIST_rawdatafilename		C:\AB SCIEX\ProteinPilot Data\Results\Albert\ZX 20200624 6600\ZX 20200624 C4B Control 6.wiff	6	8	2092	2092	2092	2092	6
	16	RESULTS_SEARCH_16_PARAMETERS_PEAKLIST_rawdatafilename		C:\AB SCIEX\ProteinPilot Data\Results\Albert\ZX 20200624 6600\ZX 20200624 C4B Control 6.wiff	6	8	2092	2092
	17	RESULTS_SEARCH_17_PARAMETERS_PEAKLIST_rawdatafilename		C:\AB SCIEX\ProteinPilot Data\Results\Albert\ZX 20200624 6600\ZX 20200624 C4B Control 7.wiff	7	9	2254	2254	2254	2254	7
	18	RESULTS_SEARCH_18_PARAMETERS_PEAKLIST_rawdatafilename		C:\AB SCIEX\ProteinPilot Data\Results\Albert\ZX 20200624 6600\ZX 20200624 C4B Control 7.wiff	7	9	2254	2254
	19	RESULTS_SEARCH_19_PARAMETERS_PEAKLIST_rawdatafilename		C:\AB SCIEX\ProteinPilot Data\Results\Albert\ZX 20200624 6600\ZX 20200624 C4B Control 8.wiff	8	10	2055	2055	2055	2055	8
	20	RESULTS_SEARCH_20_PARAMETERS_PEAKLIST_rawdatafilename		C:\AB SCIEX\ProteinPilot Data\Results\Albert\ZX 20200624 6600\ZX 20200624 C4B Control 8.wiff	8	10	2055	2055
	21	RESULTS_SEARCH_21_PARAMETERS_PEAKLIST_rawdatafilename		C:\AB SCIEX\ProteinPilot Data\Results\Albert\ZX 20200624 6600\ZX 20200624 C4B Control 9.wiff	9	11	1895	1895	1895	1895	9
	22	RESULTS_SEARCH_22_PARAMETERS_PEAKLIST_rawdatafilename		C:\AB SCIEX\ProteinPilot Data\Results\Albert\ZX 20200624 6600\ZX 20200624 C4B Control 9.wiff	9	11	1895	1895
	23	RESULTS_SEARCH_23_PARAMETERS_PEAKLIST_rawdatafilename		C:\AB SCIEX\ProteinPilot Data\Results\Albert\ZX 20200624 6600\ZX 20200624 C4B Control 10.wiff	10	12	2244	2244	2244	2244	10
	24	RESULTS_SEARCH_24_PARAMETERS_PEAKLIST_rawdatafilename		C:\AB SCIEX\ProteinPilot Data\Results\Albert\ZX 20200624 6600\ZX 20200624 C4B Control 10.wiff	10	12	2244	2244
	25	RESULTS_SEARCH_25_PARAMETERS_PEAKLIST_rawdatafilename		C:\AB SCIEX\ProteinPilot Data\Results\Albert\ZX 20200624 6600\ZX 20200624 C4B Control 11.wiff	11	13	2944	2944	2944	2944	11
	26	RESULTS_SEARCH_26_PARAMETERS_PEAKLIST_rawdatafilename		C:\AB SCIEX\ProteinPilot Data\Results\Albert\ZX 20200624 6600\ZX 20200624 C4B Control 11.wiff	11	13	2944	2944
	27	RESULTS_SEARCH_27_PARAMETERS_PEAKLIST_rawdatafilename		C:\AB SCIEX\ProteinPilot Data\Results\Albert\ZX 20200624 6600\ZX 20200624 C4B Control 11.wiff	11	14	2930	2930	2930	2930
	28	RESULTS_SEARCH_28_PARAMETERS_PEAKLIST_rawdatafilename		C:\AB SCIEX\ProteinPilot Data\Results\Albert\ZX 20200624 6600\ZX 20200624 C4B Control 11.wiff	11	14	2930	2930
	29	RESULTS_SEARCH_29_PARAMETERS_PEAKLIST_rawdatafilename		C:\AB SCIEX\ProteinPilot Data\Results\Albert\ZX 20200819 6600\ZX 20200819 6600 C4B Control 1.wiff	12	15	1261	1261	1261	1261	12
	30	RESULTS_SEARCH_30_PARAMETERS_PEAKLIST_rawdatafilename		C:\AB SCIEX\ProteinPilot Data\Results\Albert\ZX 20200819 6600\ZX 20200819 6600 C4B Control 1.wiff	12	15	1261	1261
	31	RESULTS_SEARCH_31_PARAMETERS_PEAKLIST_rawdatafilename		C:\AB SCIEX\ProteinPilot Data\Results\Albert\ZX 20200819 6600\ZX 20200819 6600 C4B Control 2.wiff	13	16	2638	2638	2638	2638	13
	32	RESULTS_SEARCH_32_PARAMETERS_PEAKLIST_rawdatafilename		C:\AB SCIEX\ProteinPilot Data\Results\Albert\ZX 20200819 6600\ZX 20200819 6600 C4B Control 2.wiff	13	16	2638	2638
	33	RESULTS_SEARCH_33_PARAMETERS_PEAKLIST_rawdatafilename		C:\AB SCIEX\ProteinPilot Data\Results\Albert\ZX 20200819 6600\ZX 20200819 6600 C4B Control 3.wiff	14	17	643	643	643	643	14
	34	RESULTS_SEARCH_34_PARAMETERS_PEAKLIST_rawdatafilename		C:\AB SCIEX\ProteinPilot Data\Results\Albert\ZX 20200819 6600\ZX 20200819 6600 C4B Control 3.wiff	14	17	643	643
	35	RESULTS_SEARCH_35_PARAMETERS_PEAKLIST_rawdatafilename		C:\AB SCIEX\ProteinPilot Data\Results\Albert\ZX 20200819 6600\ZX 20200819 6600 C4B Control 4.wiff	15	18	634	634	634	634	15
	36	RESULTS_SEARCH_36_PARAMETERS_PEAKLIST_rawdatafilename		C:\AB SCIEX\ProteinPilot Data\Results\Albert\ZX 20200819 6600\ZX 20200819 6600 C4B Control 4.wiff	15	18	634	634
	37	RESULTS_SEARCH_37_PARAMETERS_PEAKLIST_rawdatafilename		C:\AB SCIEX\ProteinPilot Data\Results\Albert\ZX 20200819 6600\ZX 20200819 6600 C4B Control 5.wiff	16	19	689	689	689	689	16
	38	RESULTS_SEARCH_38_PARAMETERS_PEAKLIST_rawdatafilename		C:\AB SCIEX\ProteinPilot Data\Results\Albert\ZX 20200819 6600\ZX 20200819 6600 C4B Control 5.wiff	16	19	689	689
	39	RESULTS_SEARCH_39_PARAMETERS_PEAKLIST_rawdatafilename		C:\AB SCIEX\ProteinPilot Data\Results\Albert\ZX 20200819 6600\ZX 20200819 6600 C4B Control 6.wiff	17	20	1837	1836	1837	1836	17
	40	RESULTS_SEARCH_40_PARAMETERS_PEAKLIST_rawdatafilename		C:\AB SCIEX\ProteinPilot Data\Results\Albert\ZX 20200819 6600\ZX 20200819 6600 C4B Control 6.wiff	17	20	1837	1836
	41	RESULTS_SEARCH_41_PARAMETERS_PEAKLIST_rawdatafilename		C:\AB SCIEX\ProteinPilot Data\Results\Albert\ZX 20200819 6600\ZX 20200819 6600 C4B Control 7.wiff	18	21	604	604	604	604	18
	42	RESULTS_SEARCH_42_PARAMETERS_PEAKLIST_rawdatafilename		C:\AB SCIEX\ProteinPilot Data\Results\Albert\ZX 20200819 6600\ZX 20200819 6600 C4B Control 7.wiff	18	21	604	604
	43	RESULTS_SEARCH_43_PARAMETERS_PEAKLIST_rawdatafilename		C:\AB SCIEX\ProteinPilot Data\Results\Albert\ZX 20200819 6600\ZX 20200819 6600 C4B Control 8.wiff	19	22	1329	1329	1329	1329	19
	44	RESULTS_SEARCH_44_PARAMETERS_PEAKLIST_rawdatafilename		C:\AB SCIEX\ProteinPilot Data\Results\Albert\ZX 20200819 6600\ZX 20200819 6600 C4B Control 8.wiff	19	22	1329	1329
	45	RESULTS_SEARCH_45_PARAMETERS_PEAKLIST_rawdatafilename		C:\AB SCIEX\ProteinPilot Data\Results\Albert\ZX 20200819 6600\ZX 20200819 6600 C4B Control 9.wiff	20	23	682	682	682	682	20
	46	RESULTS_SEARCH_46_PARAMETERS_PEAKLIST_rawdatafilename		C:\AB SCIEX\ProteinPilot Data\Results\Albert\ZX 20200819 6600\ZX 20200819 6600 C4B Control 9.wiff	20	23	682	682
	47	RESULTS_SEARCH_47_PARAMETERS_PEAKLIST_rawdatafilename		C:\AB SCIEX\ProteinPilot Data\Results\Albert\ZX 20200819 6600\ZX 20200819 6600 C4B Control 10.wiff	21	24	627	627	627	627	21
	48	RESULTS_SEARCH_48_PARAMETERS_PEAKLIST_rawdatafilename		C:\AB SCIEX\ProteinPilot Data\Results\Albert\ZX 20200819 6600\ZX 20200819 6600 C4B Control 10.wiff	21	24	627	627
	49	RESULTS_SEARCH_49_PARAMETERS_PEAKLIST_rawdatafilename		C:\AB SCIEX\ProteinPilot Data\Results\Albert\ZX 20200819 6600\ZX 20200819 6600 C4B Control 11.wiff	22	25	1546	1545	1546	1545	22
	50	RESULTS_SEARCH_50_PARAMETERS_PEAKLIST_rawdatafilename		C:\AB SCIEX\ProteinPilot Data\Results\Albert\ZX 20200819 6600\ZX 20200819 6600 C4B Control 11.wiff	22	25	1546	1545
	51	RESULTS_SEARCH_51_PARAMETERS_PEAKLIST_rawdatafilename		C:\AB SCIEX\ProteinPilot Data\Results\Albert\ZX 20200819 6600\ZX 20200819 6600 C4B Control 12.wiff	23	26	1109	1109	1109	1109	23
	52	RESULTS_SEARCH_52_PARAMETERS_PEAKLIST_rawdatafilename		C:\AB SCIEX\ProteinPilot Data\Results\Albert\ZX 20200819 6600\ZX 20200819 6600 C4B Control 12.wiff	23	26	1109	1109
	53	RESULTS_SEARCH_53_PARAMETERS_PEAKLIST_rawdatafilename		C:\AB SCIEX\ProteinPilot Data\Results\Albert\ZX 20200819 6600\ZX 20200819 6600 C4B Control 13.wiff	24	27	2099	2098	2099	2098	24
	54	RESULTS_SEARCH_54_PARAMETERS_PEAKLIST_rawdatafilename		C:\AB SCIEX\ProteinPilot Data\Results\Albert\ZX 20200819 6600\ZX 20200819 6600 C4B Control 13.wiff	24	27	2099	2098
	55	RESULTS_SEARCH_55_PARAMETERS_PEAKLIST_rawdatafilename		C:\AB SCIEX\ProteinPilot Data\Results\Albert\ZX 20200819 6600\ZX 20200819 6600 C4B Control 14.wiff	25	28	3929	3929	3929	3929	25
	56	RESULTS_SEARCH_56_PARAMETERS_PEAKLIST_rawdatafilename		C:\AB SCIEX\ProteinPilot Data\Results\Albert\ZX 20200819 6600\ZX 20200819 6600 C4B Control 14.wiff	25	28	3929	3929
	57	RESULTS_SEARCH_57_PARAMETERS_PEAKLIST_rawdatafilename		C:\AB SCIEX\ProteinPilot Data\Results\Albert\ZX 20200819 6600\ZX 20200819 6600 C4B Control 14.wiff	25	29	3947	3944	3947	3944
	58	RESULTS_SEARCH_58_PARAMETERS_PEAKLIST_rawdatafilename		C:\AB SCIEX\ProteinPilot Data\Results\Albert\ZX 20200819 6600\ZX 20200819 6600 C4B Control 14.wiff	25	29	3947	3944
	59	RESULTS_SEARCH_59_PARAMETERS_PEAKLIST_rawdatafilename		C:\AB SCIEX\ProteinPilot Data\Results\Albert\ZX 20200819 6600\ZX 20200819 6600 C4B Control 14.wiff	25	30	3934	3931	3934	3931
	60	RESULTS_SEARCH_60_PARAMETERS_PEAKLIST_rawdatafilename		C:\AB SCIEX\ProteinPilot Data\Results\Albert\ZX 20200819 6600\ZX 20200819 6600 C4B Control 14.wiff	25	30	3934	3931
	61	RESULTS_SEARCH_61_PARAMETERS_PEAKLIST_rawdatafilename		C:\AB SCIEX\ProteinPilot Data\Results\Albert\ZX 20200819 6600\ZX 20200819 6600 C4B Control 14.wiff	25	31	3935	3935	3935	3935
	62	RESULTS_SEARCH_62_PARAMETERS_PEAKLIST_rawdatafilename		C:\AB SCIEX\ProteinPilot Data\Results\Albert\ZX 20200819 6600\ZX 20200819 6600 C4B Control 14.wiff	25	31	3935	3935
	63	RESULTS_SEARCH_63_PARAMETERS_PEAKLIST_rawdatafilename		C:\AB SCIEX\ProteinPilot Data\Results\Albert\ZX 20200819 6600\ZX 20200819 6600 C4B Control 14.wiff	25	32	3929	3929	3929	3929
	64	RESULTS_SEARCH_64_PARAMETERS_PEAKLIST_rawdatafilename		C:\AB SCIEX\ProteinPilot Data\Results\Albert\ZX 20200819 6600\ZX 20200819 6600 C4B Control 14.wiff	25	32	3929	3929
	65	RESULTS_SEARCH_65_PARAMETERS_PEAKLIST_rawdatafilename		C:\AB SCIEX\ProteinPilot Data\Results\Albert\ZX 20200819 6600\ZX 20200819 6600 C4B Control 14.wiff	25	33	3919	3919	3919	3919
	66	RESULTS_SEARCH_66_PARAMETERS_PEAKLIST_rawdatafilename		C:\AB SCIEX\ProteinPilot Data\Results\Albert\ZX 20200819 6600\ZX 20200819 6600 C4B Control 14.wiff	25	33	3919	3919
	67	RESULTS_SEARCH_67_PARAMETERS_PEAKLIST_rawdatafilename		C:\AB SCIEX\ProteinPilot Data\Results\Albert\ZX 20200819 6600\ZX 20200819 6600 C4B Control 14.wiff	25	34	3934	3934	3934	3934
	68	RESULTS_SEARCH_68_PARAMETERS_PEAKLIST_rawdatafilename		C:\AB SCIEX\ProteinPilot Data\Results\Albert\ZX 20200819 6600\ZX 20200819 6600 C4B Control 14.wiff	25	34	3934	3934
	69	RESULTS_SEARCH_69_PARAMETERS_PEAKLIST_rawdatafilename		C:\AB SCIEX\ProteinPilot Data\Results\Albert\ZX 20200819 6600\ZX 20200819 6600 C4B Control 14.wiff	25	35	3916	3916	3916	3916
	70	RESULTS_SEARCH_70_PARAMETERS_PEAKLIST_rawdatafilename		C:\AB SCIEX\ProteinPilot Data\Results\Albert\ZX 20200819 6600\ZX 20200819 6600 C4B Control 14.wiff	25	35	3916	3916
	71	RESULTS_SEARCH_71_PARAMETERS_PEAKLIST_rawdatafilename		C:\AB SCIEX\ProteinPilot Data\Results\Albert\ZX 20200819 6600\ZX 20200819 6600 C4B Control 14.wiff	25	36	3928	3928	3928	3928
	72	RESULTS_SEARCH_72_PARAMETERS_PEAKLIST_rawdatafilename		C:\AB SCIEX\ProteinPilot Data\Results\Albert\ZX 20200819 6600\ZX 20200819 6600 C4B Control 14.wiff	25	36	3928	3928
	73	RESULTS_SEARCH_73_PARAMETERS_PEAKLIST_rawdatafilename		C:\AB SCIEX\ProteinPilot Data\Results\Albert\ZX 20200819 6600\ZX 20200819 6600 C4B Control 14.wiff	25	37	3930	3930	3930	3930
	74	RESULTS_SEARCH_74_PARAMETERS_PEAKLIST_rawdatafilename		C:\AB SCIEX\ProteinPilot Data\Results\Albert\ZX 20200819 6600\ZX 20200819 6600 C4B Control 14.wiff	25	37	3930	3930
	75	RESULTS_SEARCH_75_PARAMETERS_PEAKLIST_rawdatafilename		C:\AB SCIEX\ProteinPilot Data\Results\Albert\ZX 20200819 6600\ZX 20200819 6600 C4B Control 14.wiff	25	38	3930	3930	3930	3930
	76	RESULTS_SEARCH_76_PARAMETERS_PEAKLIST_rawdatafilename		C:\AB SCIEX\ProteinPilot Data\Results\Albert\ZX 20200819 6600\ZX 20200819 6600 C4B Control 14.wiff	25	38	3930	3930
	77	RESULTS_SEARCH_77_PARAMETERS_PEAKLIST_rawdatafilename		C:\AB SCIEX\ProteinPilot Data\Results\Albert\ZX 20200819 6600\ZX 20200819 6600 C4B Control 14.wiff	25	39	3930	3930	3930	3930
	78	RESULTS_SEARCH_78_PARAMETERS_PEAKLIST_rawdatafilename		C:\AB SCIEX\ProteinPilot Data\Results\Albert\ZX 20200819 6600\ZX 20200819 6600 C4B Control 14.wiff	25	39	3930	3930
	79	RESULTS_SEARCH_79_PARAMETERS_PEAKLIST_rawdatafilename		C:\AB SCIEX\ProteinPilot Data\Results\Albert\ZX 20200819 6600\ZX 20200819 6600 C4B Control 14.wiff	25	40	3908	3908	3908	3908
	80	RESULTS_SEARCH_80_PARAMETERS_PEAKLIST_rawdatafilename		C:\AB SCIEX\ProteinPilot Data\Results\Albert\ZX 20200819 6600\ZX 20200819 6600 C4B Control 14.wiff	25	40	3908	3908
	81	RESULTS_SEARCH_81_PARAMETERS_PEAKLIST_rawdatafilename		C:\AB SCIEX\ProteinPilot Data\Results\Albert\ZX 20200819 6600\ZX 20200819 6600 C4B Control 15.wiff	26	41	3789	3789	3789	3789	26
	82	RESULTS_SEARCH_82_PARAMETERS_PEAKLIST_rawdatafilename		C:\AB SCIEX\ProteinPilot Data\Results\Albert\ZX 20200819 6600\ZX 20200819 6600 C4B Control 15.wiff	26	41	3789	3789
	83	RESULTS_SEARCH_83_PARAMETERS_PEAKLIST_rawdatafilename		C:\AB SCIEX\ProteinPilot Data\Results\Albert\ZX 20200819 6600\ZX 20200819 6600 C4B Control 15.wiff	26	42	3807	3807	3807	3807
	84	RESULTS_SEARCH_84_PARAMETERS_PEAKLIST_rawdatafilename		C:\AB SCIEX\ProteinPilot Data\Results\Albert\ZX 20200819 6600\ZX 20200819 6600 C4B Control 15.wiff	26	42	3807	3807
	85	RESULTS_SEARCH_85_PARAMETERS_PEAKLIST_rawdatafilename		C:\AB SCIEX\ProteinPilot Data\Results\Albert\ZX 20200819 6600\ZX 20200819 6600 C4B Control 15.wiff	26	43	3774	3774	3774	3774
	86	RESULTS_SEARCH_86_PARAMETERS_PEAKLIST_rawdatafilename		C:\AB SCIEX\ProteinPilot Data\Results\Albert\ZX 20200819 6600\ZX 20200819 6600 C4B Control 15.wiff	26	43	3774	3774
	87	RESULTS_SEARCH_87_PARAMETERS_PEAKLIST_rawdatafilename		C:\AB SCIEX\ProteinPilot Data\Results\Albert\ZX 20200819 6600\ZX 20200819 6600 C4B Control 15.wiff	26	44	3778	3778	3778	3778
	88	RESULTS_SEARCH_88_PARAMETERS_PEAKLIST_rawdatafilename		C:\AB SCIEX\ProteinPilot Data\Results\Albert\ZX 20200819 6600\ZX 20200819 6600 C4B Control 15.wiff	26	44	3778	3778
	89	RESULTS_SEARCH_89_PARAMETERS_PEAKLIST_rawdatafilename		C:\AB SCIEX\ProteinPilot Data\Results\Albert\ZX 20200819 6600\ZX 20200819 6600 C4B Control 15.wiff	26	45	3779	3779	3779	3779
	90	RESULTS_SEARCH_90_PARAMETERS_PEAKLIST_rawdatafilename		C:\AB SCIEX\ProteinPilot Data\Results\Albert\ZX 20200819 6600\ZX 20200819 6600 C4B Control 15.wiff	26	45	3779	3779
	91	RESULTS_SEARCH_91_PARAMETERS_PEAKLIST_rawdatafilename		C:\AB SCIEX\ProteinPilot Data\Results\Albert\ZX 20200819 6600\ZX 20200819 6600 C4B Control 15.wiff	26	46	3787	3787	3787	3787
	92	RESULTS_SEARCH_92_PARAMETERS_PEAKLIST_rawdatafilename		C:\AB SCIEX\ProteinPilot Data\Results\Albert\ZX 20200819 6600\ZX 20200819 6600 C4B Control 15.wiff	26	46	3787	3787
	93	RESULTS_SEARCH_93_PARAMETERS_PEAKLIST_rawdatafilename		C:\AB SCIEX\ProteinPilot Data\Results\Albert\ZX 20200819 6600\ZX 20200819 6600 C4B Control 15.wiff	26	47	3800	3800	3800	3800
	94	RESULTS_SEARCH_94_PARAMETERS_PEAKLIST_rawdatafilename		C:\AB SCIEX\ProteinPilot Data\Results\Albert\ZX 20200819 6600\ZX 20200819 6600 C4B Control 15.wiff	26	47	3800	3800
	95	RESULTS_SEARCH_95_PARAMETERS_PEAKLIST_rawdatafilename		C:\AB SCIEX\ProteinPilot Data\Results\Albert\ZX 20200819 6600\ZX 20200819 6600 C4B Control 15.wiff	26	48	3765	3765	3765	3765
	96	RESULTS_SEARCH_96_PARAMETERS_PEAKLIST_rawdatafilename		C:\AB SCIEX\ProteinPilot Data\Results\Albert\ZX 20200819 6600\ZX 20200819 6600 C4B Control 15.wiff	26	48	3765	3765
	97	RESULTS_SEARCH_97_PARAMETERS_PEAKLIST_rawdatafilename		C:\AB SCIEX\ProteinPilot Data\Results\Albert\ZX 20200819 6600\ZX 20200819 6600 C4B Control 15.wiff	26	49	3804	3804	3804	3804
	98	RESULTS_SEARCH_98_PARAMETERS_PEAKLIST_rawdatafilename		C:\AB SCIEX\ProteinPilot Data\Results\Albert\ZX 20200819 6600\ZX 20200819 6600 C4B Control 15.wiff	26	49	3804	3804
	99	RESULTS_SEARCH_99_PARAMETERS_PEAKLIST_rawdatafilename		C:\AB SCIEX\ProteinPilot Data\Results\Albert\ZX 20200819 6600\ZX 20200819 6600 C4B Control 15.wiff	26	50	3767	3767	3767	3767
	100	RESULTS_SEARCH_100_PARAMETERS_PEAKLIST_rawdatafilename		C:\AB SCIEX\ProteinPilot Data\Results\Albert\ZX 20200819 6600\ZX 20200819 6600 C4B Control 15.wiff	26	50	3767	3767
	101	RESULTS_SEARCH_101_PARAMETERS_PEAKLIST_rawdatafilename		C:\AB SCIEX\ProteinPilot Data\Results\Albert\ZX 20200819 6600\ZX 20200819 6600 C4B Control 15.wiff	26	51	3780	3780	3780	3780
	102	RESULTS_SEARCH_102_PARAMETERS_PEAKLIST_rawdatafilename		C:\AB SCIEX\ProteinPilot Data\Results\Albert\ZX 20200819 6600\ZX 20200819 6600 C4B Control 15.wiff	26	51	3780	3780
	103	RESULTS_SEARCH_103_PARAMETERS_PEAKLIST_rawdatafilename		C:\AB SCIEX\ProteinPilot Data\Results\Albert\ZX 20200819 6600\ZX 20200819 6600 C4B Control 15.wiff	26	52	3780	3780	3780	3780
	104	RESULTS_SEARCH_104_PARAMETERS_PEAKLIST_rawdatafilename		C:\AB SCIEX\ProteinPilot Data\Results\Albert\ZX 20200819 6600\ZX 20200819 6600 C4B Control 15.wiff	26	52	3780	3780
	105	RESULTS_SEARCH_105_PARAMETERS_PEAKLIST_rawdatafilename		C:\AB SCIEX\ProteinPilot Data\Results\Albert\ZX 20200819 6600\ZX 20200819 6600 C4B Control 15.wiff	26	53	3801	3801	3801	3801
	106	RESULTS_SEARCH_106_PARAMETERS_PEAKLIST_rawdatafilename		C:\AB SCIEX\ProteinPilot Data\Results\Albert\ZX 20200819 6600\ZX 20200819 6600 C4B Control 15.wiff	26	53	3801	3801
	107	RESULTS_SEARCH_107_PARAMETERS_PEAKLIST_rawdatafilename		C:\AB SCIEX\ProteinPilot Data\Results\Albert\ZX 20200819 6600\ZX 20200819 6600 C4B Control 15.wiff	26	54	3753	3751	3753	3751
	108	RESULTS_SEARCH_108_PARAMETERS_PEAKLIST_rawdatafilename		C:\AB SCIEX\ProteinPilot Data\Results\Albert\ZX 20200819 6600\ZX 20200819 6600 C4B Control 15.wiff	26	54	3753	3751

## Sheet: Curated Metadata
Group file metadata term	Metadata Description (of raw extracted item)	Use Partial Match	Term in Stream	Derived (Calculated)	Value	Validation check/comments	Conversion type, if done	Conversion factor		Metadata Category	Metadata Description of Final Metadata Item (converted manually, if applicable)	Value
	Group filename			1						Attributes - General	Group filename	ZX 20200624 Cavin4b_control_FDR.group
RESULTS_SEARCH_1_PARAMETERS_PARAGON_METHOD_SETTINGS_UI_START_TIME	Start date		1		2021-01-19 16:12:40					Attributes - General	Start date	2021-01-19 16:12:40
RESULTS_SEARCH_STAT_search_begin_time_clock	Start time		1		01/19/2021 16:12:40					Attributes - General	Start time	01/19/2021 16:12:40
RESULTS_SEARCH_1_PARAMETERS_PARAGON_METHOD_SETTINGS_UI_USER_NAME	User name		1		IMB-MASS02\massuser					Attributes - General	User name	IMB-MASS02\massuser
RESULTS_SEARCH_1_xml:id	Internal search identifier number		1	1						Attributes - General	Internal search identifier number
PARAMETERS_PEAKLIST_original_count				1						Attributes - Input data	Number of spectra in search	152723
PARAMETERS_PEAKLIST_count				1						Attributes - Input data	Number of non-empty spectra in search	152712
PARAMETERS_PEAKLIST_filenumber	Number of input files	1	1	1	26					Attributes - Input data	Number of input files	26
RESULTS_SEARCH_1_PARAMETERS_PARAGON_METHOD_SETTINGS_UI_SAMPLE_TYPE	Sample Type		1		Identification					Parameters - User settings	Sample Type	Identification
RESULTS_SEARCH_1_PARAMETERS_PARAGON_METHOD_SETTINGS_UI_CYS_ALKYLATION	Cysteine Alkylation		1		Iodoacetamide w other Cys mods possible					Parameters - User settings	Cysteine Alkylation	Iodoacetamide w other Cys mods possible
RESULTS_SEARCH_1_PARAMETERS_PARAGON_METHOD_SETTINGS_UI_DIGESTION	Digestion		1		Trypsin + Lys C					Parameters - User settings	Digestion	Trypsin + Lys C
RESULTS_SEARCH_1_PARAMETERS_PARAGON_METHOD_SETTINGS_UI_SPECIAL_FACTOR	Special Factors		1		Gel-based ID					Parameters - User settings	Special Factors	Gel-based ID
RESULTS_SEARCH_1_PARAMETERS_PARAGON_METHOD_SETTINGS_UI_INSTRUMENT	Instrument		1		TripleTOF 6600					Parameters - User settings	Instrument	TripleTOF 6600
RESULTS_SEARCH_1_PARAMETERS_PARAGON_METHOD_SETTINGS_UI_SPECIES	Species									Parameters - User settings	Species
RESULTS_SEARCH_1_PARAMETERS_PARAGON_METHOD_SETTINGS_UI_SEARCH_EFFORT	Search Effort		1		Thorough					Parameters - User settings	Search Effort	Thorough
RESULTS_SEARCH_1_PARAMETERS_PARAGON_METHOD_SETTINGS_UI_ID_FOCUS	ID Focus									Parameters - User settings	ID Focus
RESULTS_SEARCH_1_PARAMETERS_PARAGON_METHOD_SETTINGS_UI_MIN_UNUSED_PROTSCORE	Minimum Unused ProtScore		1		0.0458					Parameters - User settings	Minimum Unused ProtScore	0.0458
RESULTS_SEARCH_1_PARAMETERS_PARAGON_METHOD_SETTINGS_UI_PSPEP	FDR Analysis		1		TRUE		Logical to English			Parameters - User settings	FDR Analysis	Yes
	Quantitation						Logical to English			Parameters - User settings	Quantitation
RESULTS_SEARCH_1_PARAMETERS_QUANT_TYPE_background_correction	Background Correction		1		FALSE		Logical to English			Parameters - User settings	Background Correction	No
RESULTS_SEARCH_1_PARAMETERS_QUANT_TYPE_bias_correction	Bias Correction		1		TRUE		Logical to English			Parameters - User settings	Bias Correction	Yes
	Channel to use as denominator in ratios									Parameters - User settings	Channel to use as denominator in ratios
RESULTS_SEARCH_1_PARAMETERS_chemical_data_edited	Modified Data Dictionary or Parameter Translation		1		FALSE		Logical to English			Parameters - User settings	Modified Data Dictionary or Parameter Translation	No
RESULTS_SEARCH_1_PARAMETERS_FASTA_filename	Database filename		1		C:\AB SCIEX\ProteinPilot Data\SearchDatabases\uniprot-zebrafish_with_Clover.fasta					Attributes - Search database	Database filename	C:\AB SCIEX\ProteinPilot Data\SearchDatabases\uniprot-zebrafish_with_Clover.fasta
				1						Attributes - Search database	Number of Proteins in Database	75212
RESULTS_SEARCH_STAT_num_proteins	Number of proteins searched		1		150424					Attributes - Search database	Number of proteins searched	150424
				1						Attributes - Search database	Number of Residues in Database	37854281
RESULTS_SEARCH_STAT_num_residues	Number of residues searched		1		75708562					Attributes - Search database	Number of residues searched	75708562
RESULTS_SEARCH_STAT_computer_memory	RAM (MB)		1		32767					Attributes - Hardware	RAM (MB)	32767
RESULTS_SEARCH_STAT_computer_name	Computer name		1		IMB-MASS02					Attributes - Hardware	Computer name	IMB-MASS02
RESULTS_SEARCH_STAT_number_cores	Number of cores in computer		1		8					Attributes - Hardware	Number of cores in computer	8
RESULTS_SEARCH_STAT_number_processors	Number of threads (double cores if hyperthreading on)		1		8					Attributes - Hardware	Number of threads (double cores if hyperthreading on)	8
RESULTS_SEARCH_STAT_number_licensed_tasks	Number of cores licensed to use		1		16					Attributes - Software environment	Number of cores licensed to use	16
RESULTS_SEARCH_STAT_os	Operating system		1		Windows Server 2008 R2 Standard (6.1.7600)					Attributes - Software environment	Operating system	Windows Server 2008 R2 Standard (6.1.7600)
RESULTS_SEARCH_1_PARAMETERS_VERSION	ProteinPilot Software Version		1		5.0.1.0, 4895					Attributes - Software environment	ProteinPilot Software Version	5.0.1.0, 4895
RESULTS_SEARCH_1_PARAMETERS_PARAGON_VERSION	Paragon Algorithm Version		1		5.0.1.0, 4874					Attributes - Software environment	Paragon Algorithm Version	5.0.1.0, 4874
RESULTS_SEARCH_1_PARAMETERS_APPLICATION	Application name		1		ProteinPilot(tm) Software					Attributes - Software environment	Application name	ProteinPilot(tm) Software
RESULTS_GROUPRESULTSUMMARY_1_confidence	Confidence of first row in summary statistics ID statistics		1		0.99		Fraction to %	100		Statistics - Protein Summary Table	Percent Confidence of first row in Summary Statistics ID Statistics	99
RESULTS_GROUPRESULTSUMMARY_1_distinctpeptides	Distinct peptides associated with 99% confidence proteins		1		2426					Statistics - Protein Summary Table	Distinct peptides associated with 99% confidence proteins	2426
RESULTS_GROUPRESULTSUMMARY_1_proteinsbeforegroupping	Proteins before grouping (99% confidence)		1		1366					Statistics - Protein Summary Table	Proteins before grouping (99% confidence)	1366
RESULTS_GROUPRESULTSUMMARY_1_proteinsidentified	Proteins detected (99% confidence)		1		272					Statistics - Protein Summary Table	Proteins detected (99% confidence)	272
RESULTS_GROUPRESULTSUMMARY_1_spectraidentified	Spectra associated with 99% confidence proteins		1		10187					Statistics - Protein Summary Table	Spectra associated with 99% confidence proteins	10187
RESULTS_GROUPRESULTSUMMARY_2_confidence	Confidence of second row in Summary Statistics ID statistics		1		0.95		Fraction to %	100		Statistics - Protein Summary Table	Percent Confidence of first row in Summary Statistics ID Statistics	95
RESULTS_GROUPRESULTSUMMARY_2_distinctpeptides	Distinct peptides associated with 95% confidence proteins		1		2630					Statistics - Protein Summary Table	Distinct peptides associated with 95% confidence proteins	2630
RESULTS_GROUPRESULTSUMMARY_2_proteinsbeforegroupping	Proteins before grouping (95% confidence)		1		1945					Statistics - Protein Summary Table	Proteins before grouping (95% confidence)	1945
RESULTS_GROUPRESULTSUMMARY_2_proteinsidentified	Proteins detected (95% confidence)		1		385					Statistics - Protein Summary Table	Proteins detected (95% confidence)	385
RESULTS_GROUPRESULTSUMMARY_2_spectraidentified	Spectra associated with 95% confidence proteins		1		10594					Statistics - Protein Summary Table	Spectra associated with 95% confidence proteins	10594
RESULTS_GROUPRESULTSUMMARY_3_confidence	Confidence of third row in summary statistics ID statistics		1		0.66		Fraction to %	100		Statistics - Protein Summary Table	Percent Confidence of first row in Summary Statistics ID Statistics	66
RESULTS_GROUPRESULTSUMMARY_3_distinctpeptides	Distinct peptides associated with 66% confidence proteins		1		2754					Statistics - Protein Summary Table	Distinct peptides associated with 66% confidence proteins	2754
RESULTS_GROUPRESULTSUMMARY_3_proteinsbeforegroupping	Proteins before grouping (66% confidence)		1		2262					Statistics - Protein Summary Table	Proteins before grouping (66% confidence)	2262
RESULTS_GROUPRESULTSUMMARY_3_proteinsidentified	Proteins detected (66% confidence)		1		451					Statistics - Protein Summary Table	Proteins detected (66% confidence)	451
RESULTS_GROUPRESULTSUMMARY_3_spectraidentified	Spectra associated with 66% confidence proteins		1		11243					Statistics - Protein Summary Table	Spectra associated with 66% confidence proteins	11243
RESULTS_GROUPRESULTSUMMARY_4_confidence	Confidence of fourth row in Summary Statistics ID statistics		1		0.100088		Fraction to %	100		Statistics - Protein Summary Table	Percent Confidence of first row in Summary Statistics ID Statistics	10.0088
RESULTS_GROUPRESULTSUMMARY_4_distinctpeptides	Distinct peptides associated with 10% confidence proteins		1		3178					Statistics - Protein Summary Table	Distinct peptides associated with 10% confidence proteins	3178
RESULTS_GROUPRESULTSUMMARY_4_proteinsbeforegroupping	Proteins before grouping (10% confidence)		1		3634					Statistics - Protein Summary Table	Proteins before grouping (10% confidence)	3634
RESULTS_GROUPRESULTSUMMARY_4_proteinsidentified	Proteins detected (10% confidence)		1		727					Statistics - Protein Summary Table	Proteins detected (10% confidence)	727
RESULTS_GROUPRESULTSUMMARY_4_spectraidentified	Spectra associated with 10% confidence proteins		1		13385					Statistics - Protein Summary Table	Spectra associated with 10% confidence proteins	13385
PARAMETERS_PEAKLIST_partnumber	Number of segments the input data are broken into	1	1	1	54					Parameters - Search Dimension Factors	Number of segments the input data are broken into	54
				1						Parameters - Search Dimension Factors	Number of searches per segment (2 for Thorough, 1 for Rapid)	2
				1						Parameters - Search Dimension Factors	Number of apparent sub-searches in group file	108
RESULTS_SEARCH_1_PARAMETERS_do_reverse_search	Do reversed search		1		TRUE					Parameters - Search Dimension Factors	Do reversed search	TRUE
RESULTS_SEARCH_1_PARAMETERS_QUANT_TYPE_separate_searches	Do separate searches for each plex in MS1 quantitation		1		FALSE					Parameters - Search Dimension Factors	Do separate searches for each plex in MS1 quantitation	FALSE
RESULTS_SEARCH_1_PARAMETERS_maxresults	Maximum number of hypotheses to keep per spectrum		1		15					Parameters - Search Dimension Factors	Maximum number of hypotheses to keep per spectrum	15
RESULTS_SEARCH_1_PARAMETERS_MSTOLERANCE_type	MS1 initial mass error tolerance type		1		dalton					Parameters - Identification - Mass accuracy	MS1 initial mass error tolerance type	dalton
RESULTS_SEARCH_1_PARAMETERS_MSTOLERANCE_value	MS1 initial mass error tolerance value		1		0.05					Parameters - Identification - Mass accuracy	MS1 initial mass error tolerance value	0.05
RESULTS_SEARCH_1_PARAMETERS_MSMSTOLERANCE_type	MS2 initial mass error tolerance type		1		dalton					Parameters - Identification - Mass accuracy	MS2 initial mass error tolerance type	dalton
RESULTS_SEARCH_1_PARAMETERS_MSMSTOLERANCE_value	MS2 initial mass error tolerance value		1		0.1					Parameters - Identification - Mass accuracy	MS2 initial mass error tolerance value	0.1
RESULTS_SEARCH_1_PARAMETERS_MS_STANDARD_DEVIATION_type	MS1 final mass error standard deviation type		1		dalton					Parameters - Identification - Mass accuracy	MS1 final mass error standard deviation type	dalton
RESULTS_SEARCH_1_PARAMETERS_MS_STANDARD_DEVIATION_value	MS1 final mass error standard deviation value		1		0.0011					Parameters - Identification - Mass accuracy	MS1 final mass error standard deviation value	0.0011
RESULTS_SEARCH_1_PARAMETERS_MSMS_STANDARD_DEVIATION_type	MS2 final mass error standard deviation type		1		dalton					Parameters - Identification - Mass accuracy	MS2 final mass error standard deviation type	dalton
RESULTS_SEARCH_1_PARAMETERS_MSMS_STANDARD_DEVIATION_value	MS2 final mass error standard deviation value		1		0.01					Parameters - Identification - Mass accuracy	MS2 final mass error standard deviation value	0.01
RESULTS_SEARCH_1_PARAMETERS_do_multiprecursor_search	Use multi-precursor search function		1		TRUE					Parameters - Identification - Multi-precursor search	Use multi-precursor search function	TRUE
RESULTS_SEARCH_1_PARAMETERS_MAX_PRECURSORS_FRAGLET	Maximum number of different precursor masses to try to match to in the Fraglet stage when doing multi-precursor search		1		5					Parameters - Identification - Multi-precursor search	Maximum number of different precursor masses to try to match to in the Fraglet stage when doing multi-precursor search	5
RESULTS_SEARCH_1_PARAMETERS_PRECURSORS_DR_FRAGLET	Maximum dynamic range gap of secondary precursors vs primary precursor in the Fraglet stage when doing multi-precursor search		1		10					Parameters - Identification - Multi-precursor search	Maximum dynamic range gap of secondary precursors vs primary precursor in the Fraglet stage when doing multi-precursor search	10
RESULTS_SEARCH_1_PARAMETERS_MAX_PRECURSORS_TAGLET	Maximum number of different precursor masses to try to match to in the Taglet stage when doing multi-precursor search		1		1					Parameters - Identification - Multi-precursor search	Maximum number of different precursor masses to try to match to in the Taglet stage when doing multi-precursor search	1
RESULTS_SEARCH_1_PARAMETERS_PRECURSORS_DR_TAGLET	Maximum dynamic range gap of secondary precursors vs primary precursor in the Taglet stage when doing multi-precursor search		1		3					Parameters - Identification - Multi-precursor search	Maximum dynamic range gap of secondary precursors vs primary precursor in the Taglet stage when doing multi-precursor search	3
RESULTS_SEARCH_1_PARAMETERS_DEFAULT_CHARGE_STATE_1_charge	First charge state to consider when precursor z is not determined		1		2					Parameters - Identification - Charge ambiguity	First charge state to consider when precursor z is not determined	2
RESULTS_SEARCH_1_PARAMETERS_DEFAULT_CHARGE_STATE_1_probability	Probability of first charge state to consider when precursor z is not determined		1		1					Parameters - Identification - Charge ambiguity	Probability of first charge state to consider when precursor z is not determined	1
RESULTS_SEARCH_1_PARAMETERS_DEFAULT_CHARGE_STATE_2_charge	Second charge state to consider when precursor z is not determined		1		3					Parameters - Identification - Charge ambiguity	Second charge state to consider when precursor z is not determined	3
RESULTS_SEARCH_1_PARAMETERS_DEFAULT_CHARGE_STATE_2_probability	Probability of second charge state to consider when precursor z is not determined		1		1					Parameters - Identification - Charge ambiguity	Probability of second charge state to consider when precursor z is not determined	1
RESULTS_SEARCH_1_PARAMETERS_DEFAULT_CHARGE_STATE_3_charge	Third charge state to consider when precursor z is not determined		1		4					Parameters - Identification - Charge ambiguity	Third charge state to consider when precursor z is not determined	4
RESULTS_SEARCH_1_PARAMETERS_DEFAULT_CHARGE_STATE_3_probability	Probability of third charge state to consider when precursor z is not determined		1		1					Parameters - Identification - Charge ambiguity	Probability of third charge state to consider when precursor z is not determined	1
RESULTS_SEARCH_1_PARAMETERS_DEFAULT_CHARGE_STATE_4_charge	Fourth charge state to consider when precursor z is not determined									Parameters - Identification - Charge ambiguity	Fourth charge state to consider when precursor z is not determined
RESULTS_SEARCH_1_PARAMETERS_DEFAULT_CHARGE_STATE_4_probability	Probability of fourth charge state to consider when precursor z is not determined									Parameters - Identification - Charge ambiguity	Probability of fourth charge state to consider when precursor z is not determined
RESULTS_SEARCH_1_PARAMETERS_PROGROUP_bayesconfidencecalclulation	Use Bayesian protein confidence calculation		1		TRUE					Parameters - Protein Grouping	Use Bayesian protein confidence calculation	TRUE
RESULTS_SEARCH_1_PARAMETERS_PROGROUP_calibrateconfidence	Use peptide FDR analysis to recalibrate peptide confidences		1		TRUE					Parameters - Protein Grouping	Use peptide FDR analysis to recalibrate peptide confidences	TRUE
RESULTS_SEARCH_1_PARAMETERS_PROGROUP_focusingintersection	In mid-Pro Group, minimum Intersection ProtScore to be in Same Group		1		4					Parameters - Protein Grouping	In mid-Pro Group, minimum Intersection ProtScore to be in Same Group	4
RESULTS_SEARCH_1_PARAMETERS_PROGROUP_focusingminunusedprotscore	In mid-Pro Group, minimum Unused ProtScore to keep a Group		1		0.1					Parameters - Protein Grouping	In mid-Pro Group, minimum Unused ProtScore to keep a Group	0.1
RESULTS_SEARCH_1_PARAMETERS_PROGROUP_focusingsubsetcutoff	In mid-Pro Group, keep competitor proteins with ProtScore units from winner		1		6					Parameters - Protein Grouping	In mid-Pro Group, keep competitor proteins with ProtScore units from winner	6
RESULTS_SEARCH_1_PARAMETERS_PROGROUP_intersection	In final Pro Group, minimum Intersection ProtScore to be in same group		1		1.3					Parameters - Protein Grouping	In final Pro Group, minimum Intersection ProtScore to be in same group	1.3
RESULTS_SEARCH_1_PARAMETERS_PROGROUP_minunusedprotscore	In final Pro Group, minimum Unused ProtScore to keep a group		1		0.0458					Parameters - Protein Grouping	In final Pro Group, minimum Unused ProtScore to keep a group	0.0458
RESULTS_SEARCH_1_PARAMETERS_PROGROUP_subsetcutoff	In final Pro Group, keep competitor proteins with ProtScore units from winner		1		2					Parameters - Protein Grouping	In final Pro Group, keep competitor proteins with ProtScore units from winner	2
RESULTS_SEARCH_1_PARAMETERS_QUANT_TYPE_background_correction	Do isobaric quant background correction algorithm		1		FALSE					Parameters - Quantitation - processing	Do isobaric quant background correction algorithm	FALSE
RESULTS_SEARCH_1_PARAMETERS_QUANT_TYPE_bias_correction	Normalize the central tendency of protein ratios to be unity		1		TRUE					Parameters - Quantitation - processing	Normalize the central tendency of protein ratios to be unity	TRUE
RESULTS_SEARCH_1_PARAMETERS_QUANT_TYPE_median_statistic	Compute protein-level ratios from the median of peptide ratios		1		TRUE					Parameters - Quantitation - processing	Compute protein-level ratios from the median of peptide ratios	TRUE
RESULTS_SEARCH_1_PARAMETERS_QUANT_TYPE_quant_threshold	Quant threshold setting no longer used		1		-1					Parameters - Quantitation - processing	Quant threshold setting no longer used	-1
RESULTS_SEARCH_1_PARAMETERS_QUANT_TYPE_quant_threshold_sn	Use measures for quantitation if signal to noise is greater than		1		9					Parameters - Quantitation - processing	Use measures for quantitation if signal to noise is greater than	9
RESULTS_SEARCH_1_PARAMETERS_max_quant_labels	Maximum number of labels allowed on a peptide for it to be used for quantitation		1		35					Parameters - Quantitation - curation	Maximum number of labels allowed on a peptide for it to be used for quantitation	35
RESULTS_SEARCH_1_PARAMETERS_QUANT_TYPE_keep_extreme_peptides_over_fraction	Include extreme ratios in the protein ratio calculation if the fraction of peptides from a protein having extreme ratios is greater than		1		0					Parameters - Quantitation - curation	Include extreme ratios in the protein ratio calculation if the fraction of peptides from a protein having extreme ratios is greater than	0
RESULTS_SEARCH_1_PARAMETERS_QUANT_TYPE_low_confidence_check	Exclude quantitation data if identification confidence does not pass a threshold value		1		TRUE					Parameters - Quantitation - curation	Exclude quantitation data if identification confidence does not pass a threshold value	TRUE
RESULTS_SEARCH_1_PARAMETERS_QUANT_TYPE_low_intensity_check	Exclude quantitation data if a minimum intensity is not passed		1		TRUE					Parameters - Quantitation - curation	Exclude quantitation data if a minimum intensity is not passed	TRUE
RESULTS_SEARCH_1_PARAMETERS_QUANT_TYPE_mod_check	Exclude quantitation data based on discordant peptide logic		1		TRUE					Parameters - Quantitation - curation	Exclude quantitation data based on discordant peptide logic	TRUE
RESULTS_SEARCH_1_PARAMETERS_QUANT_TYPE_shared_msms_check	Exclude quantitation data using sharing logic		1		TRUE					Parameters - Quantitation - curation	Exclude quantitation data using sharing logic	TRUE
RESULTS_SEARCH_1_PARAMETERS_PROGROUP_unusedprotscorethresholdforexcludingothersfromquant	Minimum protein confidence to consider a protein confident and capable of excluding spectra as shared		1		1.3					Parameters - Quantitation - curation	Minimum protein confidence to consider a protein confident and capable of excluding spectra as shared	1.3
RESULTS_SEARCH_1_PARAMETERS_PROGROUP_confidencepercentthresholdforexcludingothersfromquant	Minimum peptide percent confidence from a confident protein to consider a spectrum shared		1		15					Parameters - Quantitation - curation	Minimum peptide percent confidence from a confident protein to consider a spectrum shared	15
RESULTS_SEARCH_1_PARAMETERS_PROGROUP_confidencepercentthresholdforincludingselfinquant	Minimum peptide confidence to be used for quantitation		1		15					Parameters - Quantitation - curation	Minimum peptide confidence to be used for quantitation	15
RESULTS_SEARCH_1_PARAMETERS_PROGROUP_autodiscordantpeptidethreshold	Consider a peptide discordant if joint feature probability less than		1		0.3					Parameters - Quantitation - curation	Consider a peptide discordant if joint feature probability less than	0.3
RESULTS_SEARCH_1_PARAMETERS_PROGROUP_compresspeptides	Show results only for distinct peptides, suppressing redundancy		1		FALSE					Parameters - Non-functional	Show results only for distinct peptides, suppressing redundancy	FALSE
RESULTS_SEARCH_1_PARAMETERS_PROGROUP_donotstoremspeaklists	Do not store MS1 level data		1		FALSE					Parameters - Non-functional	Do not store MS1 level data	FALSE
RESULTS_SEARCH_STAT_search_begin_time_clock	Start time - Search		1		01/19/2021 16:12:40					Statistics - Processing Times - Start&Stop Clock Times	Start time - Search	01/19/2021 16:12:40
RESULTS_SEARCH_STAT_search_end_time_clock	End time - Search		1		01/20/2021 20:25:54					Statistics - Processing Times - Start&Stop Clock Times	End time - Search	01/20/2021 20:25:54
RESULTS_SEARCH_STAT_stage_searching_begin_time_clock	Start time - Identification algorithm stages		1		01/20/2021 17:14:15					Statistics - Processing Times - Start&Stop Clock Times	Start time - Identification algorithm stages	01/20/2021 17:14:15
RESULTS_SEARCH_STAT_stage_searching_end_time_clock	End time - Identification algorithm stages		1		01/20/2021 20:24:16					Statistics - Processing Times - Start&Stop Clock Times	End time - Identification algorithm stages	01/20/2021 20:24:16
RESULTS_SEARCH_STAT_stage_signal_processing_begin_time_clock	Start time - Signal processing stage		1		01/19/2021 16:12:41					Statistics - Processing Times - Start&Stop Clock Times	Start time - Signal processing stage	01/19/2021 16:12:41
RESULTS_SEARCH_STAT_stage_signal_processing_end_time_clock	End time - Signal processing stage		1		01/20/2021 17:10:09					Statistics - Processing Times - Start&Stop Clock Times	End time - Signal processing stage	01/20/2021 17:10:09
RESULTS_SEARCH_STAT_stage_waiting_begin_time_clock	Start time - Waiting stage		1		01/20/2021 17:10:09					Statistics - Processing Times - Start&Stop Clock Times	Start time - Waiting stage	01/20/2021 17:10:09
RESULTS_SEARCH_STAT_stage_waiting_end_time_clock	End time - Waiting stage		1		01/20/2021 17:14:15					Statistics - Processing Times - Start&Stop Clock Times	End time - Waiting stage	01/20/2021 17:14:15
RESULTS_SEARCH_STAT_task_fraglet_exe_begin_time_clock	Start time - Fraglet Algorithm search stage		1		01/20/2021 18:29:58					Statistics - Processing Times - Start&Stop Clock Times	Start time - Fraglet Algorithm search stage	01/20/2021 18:29:58
RESULTS_SEARCH_STAT_task_fraglet_exe_end_time_clock	End time - Fraglet Algorithm search stage		1		01/20/2021 19:28:14					Statistics - Processing Times - Start&Stop Clock Times	End time - Fraglet Algorithm search stage	01/20/2021 19:28:14
RESULTS_SEARCH_STAT_task_focusing_begin_time_clock	Start time - Mid-Pro Group Algorithm stage		1		01/20/2021 19:28:14					Statistics - Processing Times - Start&Stop Clock Times	Start time - Mid-Pro Group Algorithm stage	01/20/2021 19:28:14
RESULTS_SEARCH_STAT_task_focusing_end_time_clock	End time - Mid-Pro Group Algorithm stage		1		01/20/2021 19:34:38					Statistics - Processing Times - Start&Stop Clock Times	End time - Mid-Pro Group Algorithm stage	01/20/2021 19:34:38
RESULTS_SEARCH_STAT_task_taglet_exe_begin_time_clock	Start time - Taglet Algorithm search stage		1		01/20/2021 19:34:38					Statistics - Processing Times - Start&Stop Clock Times	Start time - Taglet Algorithm search stage	01/20/2021 19:34:38
RESULTS_SEARCH_STAT_task_taglet_exe_end_time_clock	End time - Taglet Algorithm search stage		1		01/20/2021 20:12:18					Statistics - Processing Times - Start&Stop Clock Times	End time - Taglet Algorithm search stage	01/20/2021 20:12:18
RESULTS_SEARCH_STAT_task_progroup_begin_time_clock	Start time - Final Pro Group Algorithm stage		1		01/20/2021 20:12:18					Statistics - Processing Times - Start&Stop Clock Times	Start time - Final Pro Group Algorithm stage	01/20/2021 20:12:18
RESULTS_SEARCH_STAT_task_progroup_end_time_clock	End time - Final Pro Group Algorithm stage		1		01/20/2021 20:24:16					Statistics - Processing Times - Start&Stop Clock Times	End time - Final Pro Group Algorithm stage	01/20/2021 20:24:16
RESULTS_SEARCH_STAT_stage_fdr_begin_time_clock	Start time - FDR analysis stage		1		01/20/2021 20:24:16					Statistics - Processing Times - Start&Stop Clock Times	Start time - FDR analysis stage	01/20/2021 20:24:16
RESULTS_SEARCH_STAT_stage_fdr_end_time_clock	End time - FDR analysis stage		1		01/20/2021 20:25:54					Statistics - Processing Times - Start&Stop Clock Times	End time - FDR analysis stage	01/20/2021 20:25:54
RESULTS_SEARCH_STAT_search_time_duration	Clock Time Duration for Full Search (ms)		1		101594807		msec to min	1.66667e-05		Statistics - Processing Times - Duration in Real Clock Times	Clock time duration - Full search (min)	1693.25
RESULTS_SEARCH_STAT_stage_searching_time_duration	Clock Time Duration for Identification Algorithm Stages (ms)		1		11400421		msec to min	1.66667e-05		Statistics - Processing Times - Duration in Real Clock Times	Clock time duration - Identification algorithm stages (min)	190.007
RESULTS_SEARCH_STAT_stage_signal_processing_time_duration	Clock Time Duration for Waiting Stage (ms)		1		89848208		msec to min	1.66667e-05		Statistics - Processing Times - Duration in Real Clock Times	Clock time duration - Signal processing stage (min)	1497.47
RESULTS_SEARCH_STAT_stage_waiting_time_duration	Clock Time Duration for Signal Processing Stage (ms)		1		246333		msec to min	1.66667e-05		Statistics - Processing Times - Duration in Real Clock Times	Clock time duration - Waiting stage (min)	4.10555
RESULTS_SEARCH_STAT_task_fraglet_exe_time_duration	Clock Time Duration for Fraglet Algorithm Stage (ms)		1		3496063		msec to min	1.66667e-05		Statistics - Processing Times - Duration in Real Clock Times	Clock time duration - Fraglet Algorithm stage (min)	58.2677
RESULTS_SEARCH_STAT_task_focusing_time_duration	Clock Time Duration for Mid-Pro Group Algorithm Stage (ms)		1		383759		msec to min	1.66667e-05		Statistics - Processing Times - Duration in Real Clock Times	Clock time duration - Mid-Pro Group Algorithm stage (min)	6.39598
RESULTS_SEARCH_STAT_task_taglet_exe_time_duration	Clock Time Duration for Taglet Algorithm Stage (ms)		1		2260370		msec to min	1.66667e-05		Statistics - Processing Times - Duration in Real Clock Times	Clock time duration - Taglet Algorithm stage (min)	37.6728
RESULTS_SEARCH_STAT_task_progroup_time_duration	Clock Time Duration for Pro Group Algorithm Stage (ms)		1		717393		msec to min	1.66667e-05		Statistics - Processing Times - Duration in Real Clock Times	Clock time duration - Pro Group Algorithm stage (min)	11.9566
RESULTS_SEARCH_STAT_stage_fdr_time_duration	Clock Time Duration for FDR Analysis (ms)		1		97909		msec to min	1.66667e-05		Statistics - Processing Times - Duration in Real Clock Times	Clock time duration - FDR Analysis (min)	1.63182
				1						Statistics - Processing Times - Duration in Real Clock Times	Clock time not accounted for in measured stages	75.7462
	CPU Time Duration for Signal Processing Stage (ms)						msec to min	1.66667e-05		Statistics - Processing Times - Duration in CPU Time	CPU time duration - Signal Processing stage (min)
RESULTS_SEARCH_STAT_task_fraglet_exe_time_cpu	CPU Time Duration for Fraglet Algorithm Stage (ms)		1		10517306		msec to min	1.66667e-05		Statistics - Processing Times - Duration in CPU Time	CPU time duration - Fraglet Algorithm stage (min)	175.288
RESULTS_SEARCH_STAT_task_focusing_time_cpu	CPU Time Duration for Mid-Pro Group Algorithm Stage (ms)		1		503430		msec to min	1.66667e-05		Statistics - Processing Times - Duration in CPU Time	CPU time duration - Mid-Pro Group Algorithm stage (min)	8.3905
RESULTS_SEARCH_STAT_task_taglet_exe_time_cpu	CPU Time Duration for Taglet Algorithm Stage (ms)		1		16439260		msec to min	1.66667e-05		Statistics - Processing Times - Duration in CPU Time	CPU time duration - Taglet Algorithm stage (min)	273.988
RESULTS_SEARCH_STAT_task_progroup_time_cpu	CPU Time Duration for Pro Group Algorithm Stage (ms)		1		838208		msec to min	1.66667e-05		Statistics - Processing Times - Duration in CPU Time	CPU time duration - Pro Group Algorithm stage (min)	13.9701
				1						Statistics - Processing Times - Percent by Stage	Percent of clock time - Identification Algorithm stages	0.112215
				1						Statistics - Processing Times - Percent by Stage	Percent of clock time - Signal Processing stage	0.884378
				1						Statistics - Processing Times - Percent by Stage	Percent of clock time - Waiting stage	0.00242466
				1						Statistics - Processing Times - Percent by Stage	Percent of clock time - Fraglet Algorithm stage	0.0344118
				1						Statistics - Processing Times - Percent by Stage	Percent of clock time - Mid-Pro Group Algorithm stage	0.00377735
				1						Statistics - Processing Times - Percent by Stage	Percent of clock time - Taglet Algorithm stage	0.0222489
				1						Statistics - Processing Times - Percent by Stage	Percent of clock time - Pro Group Algorithm stage	0.00706132
				1						Statistics - Processing Times - Percent by Stage	Percent of clock time - FDR Analysis	0.000963721
				1						Statistics - Processing Rate - Clock (Sec/Spectrum)	Clock time rate (sec/spect) - Full Search	0.665223
				1						Statistics - Processing Rate - Clock (Sec/Spectrum)	Clock time rate (sec/spect) - Identification Algorithm stages	0.0746477
				1						Statistics - Processing Rate - Clock (Sec/Spectrum)	Clock time rate (sec/spect) - Signal processing stage	0.588308
				1						Statistics - Processing Rate - Clock (Sec/Spectrum)	Clock time rate (sec/spect) - Waiting stage	0.00161294
				1						Statistics - Processing Rate - Clock (Sec/Spectrum)	Clock time rate (sec/spect) - Fraglet Algorithm stage	0.0228915
				1						Statistics - Processing Rate - Clock (Sec/Spectrum)	Clock time rate (sec/spect) - Mid-Pro Group Algorithm stage	0.00251278
				1						Statistics - Processing Rate - Clock (Sec/Spectrum)	Clock time rate (sec/spect) - Taglet Algorithm stage	0.0148005
				1						Statistics - Processing Rate - Clock (Sec/Spectrum)	Clock time rate (sec/spect) - Pro Group Algorithm stage	0.00469735
				1						Statistics - Processing Rate - Clock (Sec/Spectrum)	Clock time rate (sec/spect) - FDR Analysis	0.000641089
				1						Statistics - Processing Rate - CPU (Sec/Spectrum)	CPU time rate (sec/spect) - Signal processing stage
				1						Statistics - Processing Rate - CPU (Sec/Spectrum)	CPU time rate (sec/spect) - Fraglet Algorithm stage	0.0688652
				1						Statistics - Processing Rate - CPU (Sec/Spectrum)	CPU time rate (sec/spect) - Mid-Pro Group Algorithm stage	0.00329636
				1						Statistics - Processing Rate - CPU (Sec/Spectrum)	CPU time rate (sec/spect) - Taglet Algorithm stage	0.107641
				1						Statistics - Processing Rate - CPU (Sec/Spectrum)	CPU time rate (sec/spect) - Pro Group Algorithm stage	0.00548842
				1						Statistics - Processing Rate - Clock (Sec/Spectrum/DB Protein)	Clock time rate (sec/spect/DB protein) - Full search	4.42232e-06
				1						Statistics - Processing Rate - Clock (Sec/Spectrum/DB Protein)	Clock time rate (sec/spect/DB protein) - Identification algorithm stages	4.96249e-07
				1						Statistics - Processing Rate - Clock (Sec/Spectrum/DB Protein)	Clock time rate (sec/spect/DB protein) - Signal processing stage	3.911e-06
				1						Statistics - Processing Rate - Clock (Sec/Spectrum/DB Protein)	Clock time rate (sec/spect/DB protein) - Waiting stage	1.07226e-08
				1						Statistics - Processing Rate - Clock (Sec/Spectrum/DB Protein)	Clock time rate (sec/spect/DB protein) - Fraglet Algorithm stage	1.5218e-07
				1						Statistics - Processing Rate - Clock (Sec/Spectrum/DB Protein)	Clock time rate (sec/spect/DB protein) - Mid-Pro Group Algorithm stage	1.67046e-08
				1						Statistics - Processing Rate - Clock (Sec/Spectrum/DB Protein)	Clock time rate (sec/spect/DB protein) - Taglet Algorithm stage	9.83916e-08
				1						Statistics - Processing Rate - Clock (Sec/Spectrum/DB Protein)	Clock time rate (sec/spect/DB protein) - Pro Group Algorithm stage	3.12274e-08
				1						Statistics - Processing Rate - Clock (Sec/Spectrum/DB Protein)	Clock time rate (sec/spect/DB protein) - FDR Analysis	4.26188e-09
				1						Statistics - Processing Rate - CPU (Sec/Spectrum/DB Protein)	CPU time rate (sec/spect/DB protein) - Signal processing stage
				1						Statistics - Processing Rate - CPU (Sec/Spectrum/DB Protein)	CPU time rate (sec/spect/DB protein) - Fraglet Algorithm stage	4.57808e-07
				1						Statistics - Processing Rate - CPU (Sec/Spectrum/DB Protein)	CPU time rate (sec/spect/DB protein) - Mid-Pro Group Algorithm stage	2.19138e-08
				1						Statistics - Processing Rate - CPU (Sec/Spectrum/DB Protein)	CPU time rate (sec/spect/DB protein) - Taglet Algorithm stage	7.15584e-07
				1						Statistics - Processing Rate - CPU (Sec/Spectrum/DB Protein)	CPU time rate (sec/spect/DB protein) - Pro Group Algorithm stage	3.64863e-08
				1						Statistics - Extent of Distribution - Fundamental	Distribution factor - CPU vs. clock time - Signal processing stage
				1						Statistics - Extent of Distribution - Fundamental	Distribution factor - CPU vs. clock time - Fraglet Algorithm stage	3.00833
				1						Statistics - Extent of Distribution - Fundamental	Distribution factor - CPU vs. clock time - Mid-Pro Group Algorithm stage	1.31184
				1						Statistics - Extent of Distribution - Fundamental	Distribution factor - CPU vs. clock time - Taglet Algorithm stage	7.27282
				1						Statistics - Extent of Distribution - Fundamental	Distribution factor - CPU vs. clock time - Pro Group Algorithm stage	1.16841
				1						Statistics - Extent of Distribution - vs Segments	Ratio of distribution factor to number of search segments - Signal processing stage
				1						Statistics - Extent of Distribution - vs Segments	Ratio of distribution factor to number of search segments - Fraglet Algorithm stage	0.0557098
				1						Statistics - Extent of Distribution - vs Segments	Ratio of distribution factor to number of search segments - Mid-Pro Group Algorithm stage	0.0242933
				1						Statistics - Extent of Distribution - vs Segments	Ratio of distribution factor to number of search segments - Taglet Algorithm stage	0.134682
				1						Statistics - Extent of Distribution - vs Segments	Ratio of distribution factor to number of search segments - Pro Group Algorithm stage	0.0216372
				1						Statistics - Extent of Distribution - vs Licensed Cores	Ratio of distribution factor to number of licensed cores - Signal processing stage
				1						Statistics - Extent of Distribution - vs Licensed Cores	Ratio of distribution factor to number of licensed cores - Fraglet Algorithm stage	0.188021
				1						Statistics - Extent of Distribution - vs Licensed Cores	Ratio of distribution factor to number of licensed cores - Mid-Pro Group Algorithm stage	0.0819899
				1						Statistics - Extent of Distribution - vs Licensed Cores	Ratio of distribution factor to number of licensed cores - Taglet Algorithm stage	0.454551
				1						Statistics - Extent of Distribution - vs Licensed Cores	Ratio of distribution factor to number of licensed cores - Pro Group Algorithm stage	0.0730255
PARAMETERS_PEAKLIST_original_count	Average number of spectra per segment	1	1	1	2828.2					Statistics - Search Segmentation	Average number of spectra per segment	2828.2
PARAMETERS_PEAKLIST_original_count	Standard deviation of number of spectra per segment	1	1	1	1173.05					Statistics - Search Segmentation	Standard deviation of number of spectra per segment	1173.05
PARAMETERS_PEAKLIST_original_count	Maximum number of spectra per segment	1	1	1	3947					Statistics - Search Segmentation	Maximum number of spectra per segment	3947
PARAMETERS_PEAKLIST_original_count	Minimum number of spectra per segment	1	1	1	604					Statistics - Search Segmentation	Minimum number of spectra per segment	604
										Attributes - Input data filenames	Filename of Input File 1	C:\AB SCIEX\ProteinPilot Data\Results\Albert\ZX 20200624 6600\ZX 20200624 C4B Control 1.wiff
										Attributes - Input data filenames	Filename of Input File 2	C:\AB SCIEX\ProteinPilot Data\Results\Albert\ZX 20200624 6600\ZX 20200624 C4B Control 2.wiff
										Attributes - Input data filenames	Filename of Input File 3	C:\AB SCIEX\ProteinPilot Data\Results\Albert\ZX 20200624 6600\ZX 20200624 C4B Control 3.wiff
										Attributes - Input data filenames	Filename of Input File 4	C:\AB SCIEX\ProteinPilot Data\Results\Albert\ZX 20200624 6600\ZX 20200624 C4B Control 4.wiff
										Attributes - Input data filenames	Filename of Input File 5	C:\AB SCIEX\ProteinPilot Data\Results\Albert\ZX 20200624 6600\ZX 20200624 C4B Control 5.wiff
										Attributes - Input data filenames	Filename of Input File 6	C:\AB SCIEX\ProteinPilot Data\Results\Albert\ZX 20200624 6600\ZX 20200624 C4B Control 6.wiff
										Attributes - Input data filenames	Filename of Input File 7	C:\AB SCIEX\ProteinPilot Data\Results\Albert\ZX 20200624 6600\ZX 20200624 C4B Control 7.wiff
										Attributes - Input data filenames	Filename of Input File 8	C:\AB SCIEX\ProteinPilot Data\Results\Albert\ZX 20200624 6600\ZX 20200624 C4B Control 8.wiff
										Attributes - Input data filenames	Filename of Input File 9	C:\AB SCIEX\ProteinPilot Data\Results\Albert\ZX 20200624 6600\ZX 20200624 C4B Control 9.wiff
										Attributes - Input data filenames	Filename of Input File 10	C:\AB SCIEX\ProteinPilot Data\Results\Albert\ZX 20200624 6600\ZX 20200624 C4B Control 10.wiff
										Attributes - Input data filenames	Filename of Input File 11	C:\AB SCIEX\ProteinPilot Data\Results\Albert\ZX 20200624 6600\ZX 20200624 C4B Control 11.wiff
										Attributes - Input data filenames	Filename of Input File 12	C:\AB SCIEX\ProteinPilot Data\Results\Albert\ZX 20200819 6600\ZX 20200819 6600 C4B Control 1.wiff
										Attributes - Input data filenames	Filename of Input File 13	C:\AB SCIEX\ProteinPilot Data\Results\Albert\ZX 20200819 6600\ZX 20200819 6600 C4B Control 2.wiff
										Attributes - Input data filenames	Filename of Input File 14	C:\AB SCIEX\ProteinPilot Data\Results\Albert\ZX 20200819 6600\ZX 20200819 6600 C4B Control 3.wiff
										Attributes - Input data filenames	Filename of Input File 15	C:\AB SCIEX\ProteinPilot Data\Results\Albert\ZX 20200819 6600\ZX 20200819 6600 C4B Control 4.wiff
										Attributes - Input data filenames	Filename of Input File 16	C:\AB SCIEX\ProteinPilot Data\Results\Albert\ZX 20200819 6600\ZX 20200819 6600 C4B Control 5.wiff
										Attributes - Input data filenames	Filename of Input File 17	C:\AB SCIEX\ProteinPilot Data\Results\Albert\ZX 20200819 6600\ZX 20200819 6600 C4B Control 6.wiff
										Attributes - Input data filenames	Filename of Input File 18	C:\AB SCIEX\ProteinPilot Data\Results\Albert\ZX 20200819 6600\ZX 20200819 6600 C4B Control 7.wiff
										Attributes - Input data filenames	Filename of Input File 19	C:\AB SCIEX\ProteinPilot Data\Results\Albert\ZX 20200819 6600\ZX 20200819 6600 C4B Control 8.wiff
										Attributes - Input data filenames	Filename of Input File 20	C:\AB SCIEX\ProteinPilot Data\Results\Albert\ZX 20200819 6600\ZX 20200819 6600 C4B Control 9.wiff
										Attributes - Input data filenames	Filename of Input File 21	C:\AB SCIEX\ProteinPilot Data\Results\Albert\ZX 20200819 6600\ZX 20200819 6600 C4B Control 10.wiff
										Attributes - Input data filenames	Filename of Input File 22	C:\AB SCIEX\ProteinPilot Data\Results\Albert\ZX 20200819 6600\ZX 20200819 6600 C4B Control 11.wiff
										Attributes - Input data filenames	Filename of Input File 23	C:\AB SCIEX\ProteinPilot Data\Results\Albert\ZX 20200819 6600\ZX 20200819 6600 C4B Control 12.wiff
										Attributes - Input data filenames	Filename of Input File 24	C:\AB SCIEX\ProteinPilot Data\Results\Albert\ZX 20200819 6600\ZX 20200819 6600 C4B Control 13.wiff
										Attributes - Input data filenames	Filename of Input File 25	C:\AB SCIEX\ProteinPilot Data\Results\Albert\ZX 20200819 6600\ZX 20200819 6600 C4B Control 14.wiff
										Attributes - Input data filenames	Filename of Input File 26	C:\AB SCIEX\ProteinPilot Data\Results\Albert\ZX 20200819 6600\ZX 20200819 6600 C4B Control 15.wiff
										Attributes - Input data filenames	Filename of Input File 27
										Attributes - Input data filenames	Filename of Input File 28
										Attributes - Input data filenames	Filename of Input File 29
										Attributes - Input data filenames	Filename of Input File 30
										Attributes - Input data filenames	Filename of Input File 31
										Attributes - Input data filenames	Filename of Input File 32
										Attributes - Input data filenames	Filename of Input File 33
										Attributes - Input data filenames	Filename of Input File 34
										Attributes - Input data filenames	Filename of Input File 35
										Attributes - Input data filenames	Filename of Input File 36
										Attributes - Input data filenames	Filename of Input File 37
										Attributes - Input data filenames	Filename of Input File 38
										Attributes - Input data filenames	Filename of Input File 39
										Attributes - Input data filenames	Filename of Input File 40
										Attributes - Input data filenames	Filename of Input File 41
										Attributes - Input data filenames	Filename of Input File 42
										Attributes - Input data filenames	Filename of Input File 43
										Attributes - Input data filenames	Filename of Input File 44
										Attributes - Input data filenames	Filename of Input File 45
										Attributes - Input data filenames	Filename of Input File 46
										Attributes - Input data filenames	Filename of Input File 47
										Attributes - Input data filenames	Filename of Input File 48
										Attributes - Input data filenames	Filename of Input File 49
										Attributes - Input data filenames	Filename of Input File 50
										Attributes - Input data filenames	Filename of Input File 51
										Attributes - Input data filenames	Filename of Input File 52
										Attributes - Input data filenames	Filename of Input File 53
										Attributes - Input data filenames	Filename of Input File 54
										Attributes - Input data filenames	Filename of Input File 55
										Attributes - Input data filenames	Filename of Input File 56
										Attributes - Input data filenames	Filename of Input File 57
										Attributes - Input data filenames	Filename of Input File 58
										Attributes - Input data filenames	Filename of Input File 59
										Attributes - Input data filenames	Filename of Input File 60
										Attributes - Input data filenames	Filename of Input File 61
										Attributes - Input data filenames	Filename of Input File 62
										Attributes - Input data filenames	Filename of Input File 63
										Attributes - Input data filenames	Filename of Input File 64
										Attributes - Input data filenames	Filename of Input File 65
										Attributes - Input data filenames	Filename of Input File 66
										Attributes - Input data filenames	Filename of Input File 67
										Attributes - Input data filenames	Filename of Input File 68
										Attributes - Input data filenames	Filename of Input File 69
										Attributes - Input data filenames	Filename of Input File 70
										Attributes - Input data filenames	Filename of Input File 71
										Attributes - Input data filenames	Filename of Input File 72
										Attributes - Input data filenames	Filename of Input File 73
										Attributes - Input data filenames	Filename of Input File 74
										Attributes - Input data filenames	Filename of Input File 75
										Attributes - Input data filenames	Filename of Input File 76
										Attributes - Input data filenames	Filename of Input File 77
										Attributes - Input data filenames	Filename of Input File 78
										Attributes - Input data filenames	Filename of Input File 79
										Attributes - Input data filenames	Filename of Input File 80
										Attributes - Input data filenames	Filename of Input File 81
										Attributes - Input data filenames	Filename of Input File 82
										Attributes - Input data filenames	Filename of Input File 83
										Attributes - Input data filenames	Filename of Input File 84
										Attributes - Input data filenames	Filename of Input File 85
										Attributes - Input data filenames	Filename of Input File 86
										Attributes - Input data filenames	Filename of Input File 87
										Attributes - Input data filenames	Filename of Input File 88
										Attributes - Input data filenames	Filename of Input File 89
										Attributes - Input data filenames	Filename of Input File 90
										Attributes - Input data filenames	Filename of Input File 91
										Attributes - Input data filenames	Filename of Input File 92
										Attributes - Input data filenames	Filename of Input File 93
										Attributes - Input data filenames	Filename of Input File 94
										Attributes - Input data filenames	Filename of Input File 95
										Attributes - Input data filenames	Filename of Input File 96
										Attributes - Input data filenames	Filename of Input File 97
										Attributes - Input data filenames	Filename of Input File 98
										Attributes - Input data filenames	Filename of Input File 99
										Attributes - Input data filenames	Filename of Input File 100
										Attributes - Input data filenames	Filename of Input File 101
										Attributes - Input data filenames	Filename of Input File 102
										Attributes - Input data filenames	Filename of Input File 103
										Attributes - Input data filenames	Filename of Input File 104
										Attributes - Input data filenames	Filename of Input File 105
										Attributes - Input data filenames	Filename of Input File 106
										Attributes - Input data filenames	Filename of Input File 107
										Attributes - Input data filenames	Filename of Input File 108
										Attributes - Input data filenames	Filename of Input File 109
										Attributes - Input data filenames	Filename of Input File 110
										Attributes - Input data filenames	Filename of Input File 111
										Attributes - Input data filenames	Filename of Input File 112
										Attributes - Input data filenames	Filename of Input File 113
										Attributes - Input data filenames	Filename of Input File 114
										Attributes - Input data filenames	Filename of Input File 115
										Attributes - Input data filenames	Filename of Input File 116
										Attributes - Input data filenames	Filename of Input File 117
										Attributes - Input data filenames	Filename of Input File 118
										Attributes - Input data filenames	Filename of Input File 119
										Attributes - Input data filenames	Filename of Input File 120
										Attributes - Input data filenames	Filename of Input File 121
										Attributes - Input data filenames	Filename of Input File 122
										Attributes - Input data filenames	Filename of Input File 123
										Attributes - Input data filenames	Filename of Input File 124
										Attributes - Input data filenames	Filename of Input File 125
										Attributes - Input data filenames	Filename of Input File 126
										Attributes - Input data filenames	Filename of Input File 127
										Attributes - Input data filenames	Filename of Input File 128
										Attributes - Input data filenames	Filename of Input File 129
										Attributes - Input data filenames	Filename of Input File 130
										Attributes - Input data filenames	Filename of Input File 131
										Attributes - Input data filenames	Filename of Input File 132
										Attributes - Input data filenames	Filename of Input File 133
										Attributes - Input data filenames	Filename of Input File 134
										Attributes - Input data filenames	Filename of Input File 135
										Attributes - Input data filenames	Filename of Input File 136
										Attributes - Input data filenames	Filename of Input File 137
										Attributes - Input data filenames	Filename of Input File 138
										Attributes - Input data filenames	Filename of Input File 139
										Attributes - Input data filenames	Filename of Input File 140
										Attributes - Input data filenames	Filename of Input File 141
										Attributes - Input data filenames	Filename of Input File 142
										Attributes - Input data filenames	Filename of Input File 143
										Attributes - Input data filenames	Filename of Input File 144
										Attributes - Input data filenames	Filename of Input File 145
										Attributes - Input data filenames	Filename of Input File 146
										Attributes - Input data filenames	Filename of Input File 147
										Attributes - Input data filenames	Filename of Input File 148
										Attributes - Input data filenames	Filename of Input File 149
										Attributes - Input data filenames	Filename of Input File 150
										Attributes - Input data filenames	Filename of Input File 151
										Attributes - Input data filenames	Filename of Input File 152
										Attributes - Input data filenames	Filename of Input File 153
										Attributes - Input data filenames	Filename of Input File 154
										Attributes - Input data filenames	Filename of Input File 155
										Attributes - Input data filenames	Filename of Input File 156
										Attributes - Input data filenames	Filename of Input File 157
										Attributes - Input data filenames	Filename of Input File 158
										Attributes - Input data filenames	Filename of Input File 159
										Attributes - Input data filenames	Filename of Input File 160
										Attributes - Input data filenames	Filename of Input File 161
										Attributes - Input data filenames	Filename of Input File 162
										Attributes - Input data filenames	Filename of Input File 163
										Attributes - Input data filenames	Filename of Input File 164
										Attributes - Input data filenames	Filename of Input File 165
										Attributes - Input data filenames	Filename of Input File 166
										Attributes - Input data filenames	Filename of Input File 167
										Attributes - Input data filenames	Filename of Input File 168
										Attributes - Input data filenames	Filename of Input File 169
										Attributes - Input data filenames	Filename of Input File 170
										Attributes - Input data filenames	Filename of Input File 171
										Attributes - Input data filenames	Filename of Input File 172
										Attributes - Input data filenames	Filename of Input File 173
										Attributes - Input data filenames	Filename of Input File 174
										Attributes - Input data filenames	Filename of Input File 175
										Attributes - Input data filenames	Filename of Input File 176
										Attributes - Input data filenames	Filename of Input File 177
										Attributes - Input data filenames	Filename of Input File 178
										Attributes - Input data filenames	Filename of Input File 179
										Attributes - Input data filenames	Filename of Input File 180
										Attributes - Input data filenames	Filename of Input File 181
										Attributes - Input data filenames	Filename of Input File 182
										Attributes - Input data filenames	Filename of Input File 183
										Attributes - Input data filenames	Filename of Input File 184
										Attributes - Input data filenames	Filename of Input File 185
										Attributes - Input data filenames	Filename of Input File 186
										Attributes - Input data filenames	Filename of Input File 187
										Attributes - Input data filenames	Filename of Input File 188
										Attributes - Input data filenames	Filename of Input File 189
										Attributes - Input data filenames	Filename of Input File 190
										Attributes - Input data filenames	Filename of Input File 191
										Attributes - Input data filenames	Filename of Input File 192
										Attributes - Input data filenames	Filename of Input File 193
										Attributes - Input data filenames	Filename of Input File 194
										Attributes - Input data filenames	Filename of Input File 195
										Attributes - Input data filenames	Filename of Input File 196
										Attributes - Input data filenames	Filename of Input File 197
										Attributes - Input data filenames	Filename of Input File 198
										Attributes - Input data filenames	Filename of Input File 199
										Attributes - Input data filenames	Filename of Input File 200

## Sheet: Protein Level Data
Protein Level Data	Unused ProtScore Threshold	Confidence Threshold	Forward	Reverse	Correct	Incorrect	Total	Global FDR	q-value	Fit Unused ProtScore Threshold	Fit Confidence Threshold	Fit Forward	Fit Reverse	Fit Correct	Fit Incorrect	Fit Total	Fit Global FDR	Fit Local FDR
	112.5	1	1	0	1	0	1	0	0	112.5	1	1	4.87158e-10	1	9.74317e-10	1	9.74317e-10	9.74317e-10
	73.86	1	2	0	2	0	2	0	0	73.86	1	2	9.74318e-10	2	1.94864e-09	2	9.74318e-10	9.74318e-10
	57.03	1	3	0	3	0	3	0	0	57.03	1	3	1.46148e-09	3	2.92295e-09	3	9.74318e-10	9.74318e-10
	50.99	1	4	0	4	0	4	0	0	50.99	1	4	1.94864e-09	4	3.89727e-09	4	9.74318e-10	9.74318e-10
	46.52	1	5	0	5	0	5	0	0	46.52	1	5	2.4358e-09	5	4.87159e-09	5	9.74318e-10	9.74319e-10
	38.4	1	6	0	6	0	6	0	0	38.4	1	6	2.92296e-09	6	5.84591e-09	6	9.74318e-10	9.74319e-10
	37.59	1	7	0	7	0	7	0	0	37.59	1	7	3.41012e-09	7	6.82023e-09	7	9.74319e-10	9.7432e-10
	36.27	1	8	0	8	0	8	0	0	36.27	1	8	3.89727e-09	8	7.79455e-09	8	9.74319e-10	9.7432e-10
	34.45	1	9	0	9	0	9	0	0	34.45	1	9	4.38444e-09	9	8.76887e-09	9	9.74319e-10	9.74321e-10
	32.41	1	10	0	10	0	10	0	0	32.41	1	10	4.8716e-09	10	9.74319e-09	10	9.74319e-10	9.74321e-10
	30.45	1	11	0	11	0	11	0	0	30.45	1	11	5.35876e-09	11	1.07175e-08	11	9.74319e-10	9.74321e-10
	29.63	1	12	0	12	0	12	0	0	29.63	1	12	5.84592e-09	12	1.16918e-08	12	9.7432e-10	9.74322e-10
	29.02	1	13	0	13	0	13	0	0	29.02	1	13	6.33308e-09	13	1.26662e-08	13	9.7432e-10	9.74322e-10
	24.01	1	14	0	14	0	14	0	0	24.01	1	14	6.82024e-09	14	1.36405e-08	14	9.7432e-10	9.74323e-10
	23.25	1	15	0	15	0	15	0	0	23.25	1	15	7.3074e-09	15	1.46148e-08	15	9.7432e-10	9.74323e-10
	22.99	1	16	0	16	0	16	0	0	22.99	1	16	7.79456e-09	16	1.55891e-08	16	9.7432e-10	9.74323e-10
	22.94	1	17	0	17	0	17	0	0	22.94	1	17	8.28172e-09	17	1.65634e-08	17	9.74321e-10	9.74324e-10
	22.44	1	18	0	18	0	18	0	0	22.44	1	18	8.76889e-09	18	1.75378e-08	18	9.74321e-10	9.74324e-10
	21.67	1	19	0	19	0	19	0	0	21.67	1	19	9.25605e-09	19	1.85121e-08	19	9.74321e-10	9.74325e-10
	19.18	1	20	0	20	0	20	0	0	19.18	1	20	9.74321e-09	20	1.94864e-08	20	9.74321e-10	9.74325e-10
	17.95	1	21	0	21	0	21	0	0	17.95	1	21	1.02304e-08	21	2.04607e-08	21	9.74321e-10	9.74325e-10
	17.81	1	22	0	22	0	22	0	0	17.81	1	22	1.07175e-08	22	2.14351e-08	22	9.74321e-10	9.74326e-10
	17.65	1	23	0	23	0	23	0	0	17.65	1	23	1.12047e-08	23	2.24094e-08	23	9.74322e-10	9.74326e-10
	17.61	1	24	0	24	0	24	0	0	17.61	1	24	1.16919e-08	24	2.33837e-08	24	9.74322e-10	9.74327e-10
	17.2	1	25	0	25	0	25	0	0	17.2	1	25	1.2179e-08	25	2.43581e-08	25	9.74322e-10	9.74327e-10
	17.01	1	26	0	26	0	26	0	0	17.01	1	26	1.26662e-08	26	2.53324e-08	26	9.74322e-10	9.74327e-10
	16.76	1	27	0	27	0	27	0	0	16.76	1	27	1.31534e-08	27	2.63067e-08	27	9.74323e-10	9.74328e-10
	16.49	1	28	0	28	0	28	0	0	16.49	1	28	1.36405e-08	28	2.7281e-08	28	9.74323e-10	9.74328e-10
	16.24	1	29	0	29	0	29	0	0	16.24	1	29	1.41277e-08	29	2.82554e-08	29	9.74323e-10	9.74329e-10
	15.89	1	31	0	31	0	31	0	0	15.89	1	30	1.46148e-08	30	2.92297e-08	30	9.74323e-10	9.74329e-10
	15.81	1	32	0	32	0	32	0	0	15.89	1	31	1.5102e-08	31	3.0204e-08	31	9.74323e-10	9.74329e-10
	14.22	1	33	0	33	0	33	0	0	15.81	1	32	1.55892e-08	32	3.11784e-08	32	9.74324e-10	9.7433e-10
	14.12	1	34	0	34	0	34	0	0	14.22	1	33	1.60763e-08	33	3.21527e-08	33	9.74324e-10	9.7433e-10
	14.1	1	35	0	35	0	35	0	0	14.12	1	34	1.65635e-08	34	3.3127e-08	34	9.74324e-10	9.74331e-10
	14.04	1	36	0	36	0	36	0	0	14.1	1	35	1.70507e-08	35	3.41013e-08	35	9.74324e-10	9.74331e-10
	13.19	1	37	0	37	0	37	0	0	14.04	1	36	1.75378e-08	36	3.50757e-08	36	9.74324e-10	9.74331e-10
	13.08	1	38	0	38	0	38	0	0	13.19	1	37	1.8025e-08	37	3.605e-08	37	9.74325e-10	9.74332e-10
	12.87	1	39	0	39	0	39	0	0	13.08	1	38	1.85122e-08	38	3.70243e-08	38	9.74325e-10	9.74332e-10
	12.47	1	40	0	40	0	40	0	0	12.87	1	39	1.89993e-08	39	3.79987e-08	39	9.74325e-10	9.74333e-10
	12	1	41	0	41	0	41	0	0	12.47	1	40	1.94865e-08	40	3.8973e-08	40	9.74325e-10	9.74333e-10
	11.77	1	42	0	42	0	42	0	0	12	1	41	1.99737e-08	41	3.99473e-08	41	9.74325e-10	9.74333e-10
	11.41	1	43	0	43	0	43	0	0	11.77	1	42	2.04608e-08	42	4.09217e-08	42	9.74326e-10	9.74334e-10
	11.34	1	44	0	44	0	44	0	0	11.41	1	43	2.0948e-08	43	4.1896e-08	43	9.74326e-10	9.74334e-10
	11.28	1	45	0	45	0	45	0	0	11.34	1	44	2.14352e-08	44	4.28703e-08	44	9.74326e-10	9.74335e-10
	11.26	1	46	0	46	0	46	0	0	11.28	1	45	2.19223e-08	45	4.38447e-08	45	9.74326e-10	9.74336e-10
	10.95	1	47	0	47	0	47	0	0	11.26	1	46	2.24095e-08	46	4.4819e-08	46	9.74326e-10	9.74337e-10
	10.8	1	48	0	48	0	48	0	0	10.95	1	47	2.28967e-08	47	4.57934e-08	47	9.74327e-10	9.74339e-10
	10.52	1	49	0	49	0	49	0	0	10.8	1	48	2.33838e-08	48	4.67677e-08	48	9.74327e-10	9.74344e-10
	10.35	1	50	0	50	0	50	0	0	10.52	1	49	2.3871e-08	49	4.7742e-08	49	9.74328e-10	9.74351e-10
	10.27	1	51	0	51	0	51	0	0	10.35	1	50	2.43582e-08	50	4.87164e-08	50	9.74328e-10	9.74365e-10
	10.08	1	52	0	52	0	52	0	0	10.27	1	51	2.48454e-08	51	4.96908e-08	51	9.7433e-10	9.74391e-10
	10	1	54	0	54	0	54	0	0	10.08	1	52	2.53326e-08	52	5.06652e-08	52	9.74332e-10	9.74436e-10
	9.85	1	55	0	55	0	55	0	0	10	1	53	2.58199e-08	53	5.16398e-08	53	9.74335e-10	9.74574e-10
	9.7	1	56	0	56	0	56	0	0	10	1	54	2.63072e-08	54	5.26144e-08	54	9.74341e-10	9.74574e-10
	9.66	1	57	0	57	0	57	0	0	9.85	1	55	2.67946e-08	55	5.35893e-08	55	9.74351e-10	9.74876e-10
	9.57	1	58	0	58	0	58	0	0	9.7	1	56	2.72823e-08	56	5.45646e-08	56	9.74367e-10	9.75246e-10
	9.38	1	59	0	59	0	59	0	0	9.66	1	57	2.77702e-08	57	5.55404e-08	57	9.74393e-10	9.75842e-10
	9.02	1	61	0	61	0	61	0	0	9.57	1	58	2.82586e-08	58	5.65172e-08	58	9.74435e-10	9.76785e-10
	8.98	1	62	0	62	0	62	0	0	9.38	1	59	2.87478e-08	59	5.74955e-08	59	9.745e-10	9.78253e-10
	8.93	1	63	0	63	0	63	0	0	9.02	1	60	2.9238e-08	60	5.84761e-08	60	9.74601e-10	9.82028e-10
	8.83	1	64	0	64	0	64	0	0	9.02	1	61	2.973e-08	61	5.946e-08	61	9.74754e-10	9.82028e-10
	8.79	1	65	0	65	0	65	0	0	8.98	1	62	3.02245e-08	62	6.04491e-08	62	9.74985e-10	9.88947e-10
	8.71	1	66	0	66	0	66	0	0	8.93	1	63	3.07228e-08	63	6.14456e-08	63	9.75326e-10	9.96361e-10
	8.44	1	67	0	67	0	67	0	0	8.83	1	64	3.12264e-08	64	6.24529e-08	64	9.75826e-10	1.0071e-09
	8.37	1	68	0	68	0	68	0	0	8.79	1	65	3.17378e-08	65	6.34756e-08	65	9.76548e-10	1.02248e-09
	8.01	1	69	0	69	0	69	0	0	8.71	1	66	3.22601e-08	66	6.45202e-08	66	9.77578e-10	1.04422e-09
	8	1	70	0	70	0	70	0	0	8.44	1	67	3.27977e-08	67	6.55953e-08	67	9.79034e-10	1.07464e-09
	7.98	1	71	0	71	0	71	0	0	8.37	1	68	3.33563e-08	68	6.67127e-08	68	9.81069e-10	1.11675e-09
	7.59	1	72	0	72	0	72	0	0	8.01	1	69	3.3944e-08	69	6.7888e-08	69	9.83884e-10	1.17442e-09
	7.55	1	73	0	73	0	73	0	0	8	1	70	3.45709e-08	70	6.91417e-08	70	9.87739e-10	1.25266e-09
	7.42	1	74	0	74	0	74	0	0	7.98	1	71	3.52505e-08	71	7.0501e-08	71	9.92972e-10	1.35782e-09
	7.35	1	76	0	76	0	76	0	0	7.59	1	72	3.60004e-08	72	7.20008e-08	72	1.00001e-09	1.49789e-09
	7.33	1	77	0	77	0	77	0	0	7.55	1	73	3.6843e-08	73	7.3686e-08	73	1.0094e-09	1.6829e-09
	7.32	1	78	0	78	0	78	0	0	7.42	1	74	3.78072e-08	74	7.56143e-08	74	1.02182e-09	1.92525e-09
	7.25	1	79	0	79	0	79	0	0	7.35	1	75	3.89292e-08	75	7.78584e-08	75	1.03811e-09	2.43068e-09
	7.18	1	80	0	80	0	80	0	0	7.35	1	76	4.02548e-08	76	8.05097e-08	76	1.05934e-09	2.43068e-09
	7.1	1	82	0	82	0	82	0	0	7.33	1	77	4.18413e-08	77	8.36826e-08	77	1.08679e-09	3.167e-09
	7.07	1	83	0	83	0	83	0	0	7.32	1	78	4.37594e-08	78	8.75187e-08	78	1.12203e-09	3.8289e-09
	7.04	1	84	0	84	0	84	0	0	7.25	1	79	4.60964e-08	79	9.21928e-08	79	1.167e-09	4.66516e-09
	6.94	1	85	0	85	0	85	0	0	7.18	1	80	4.89593e-08	80	9.79185e-08	80	1.22398e-09	5.71496e-09
	6.79	1	86	0	86	0	86	0	0	7.1	1	81	5.24782e-08	81	1.04956e-07	81	1.29576e-09	7.7939e-09
	6.76	1	87	0	87	0	87	0	0	7.1	1	82	5.68107e-08	82	1.13621e-07	82	1.38563e-09	7.7939e-09
	6.72	1	88	0	88	0	88	0	0	7.07	1	83	6.21465e-08	83	1.24293e-07	83	1.49751e-09	1.06527e-08
	6.71	1	89	0	89	0	89	0	0	7.04	1	84	6.87127e-08	84	1.37425e-07	84	1.63602e-09	1.31099e-08
	6.63	1	90	0	90	0	90	0	0	6.94	1	85	7.67799e-08	85	1.5356e-07	85	1.80659e-09	1.61077e-08
	6.54	1	91	0	91	0	91	0	0	6.79	1	86	8.66689e-08	86	1.73338e-07	86	2.01556e-09	1.97465e-08
	6.49	1	92	0	92	0	92	0	0	6.76	1	87	9.87583e-08	87	1.97517e-07	87	2.2703e-09	2.41418e-08
	6.38	1	93	0	93	0	93	0	0	6.72	1	88	1.13493e-07	88	2.26985e-07	88	2.57938e-09	2.94255e-08
	6.37	1	94	0	94	0	94	0	0	6.71	1	89	1.31392e-07	89	2.62784e-07	89	2.95263e-09	3.57484e-08
	6.36	1	95	0	95	0	95	0	0	6.63	1	90	1.53062e-07	90	3.06124e-07	90	3.40138e-09	4.32816e-08
	6.34	1	96	0	96	0	96	0	0	6.54	1	91	1.79205e-07	91	3.5841e-07	91	3.93857e-09	5.22183e-08
	6.21	0.999999	97	0	97	0	97	0	0	6.49	1	92	2.10632e-07	92	4.21264e-07	92	4.57896e-09	6.27767e-08
	6.18	0.999999	98	0	98	0	98	0	0	6.38	1	93	2.48277e-07	93	4.96555e-07	93	5.3393e-09	7.52014e-08
	6.14	0.999999	99	0	99	0	99	0	0	6.37	1	94	2.93211e-07	94	5.86423e-07	94	6.23854e-09	8.9766e-08
	6.04	0.999999	100	0	100	0	100	0	0	6.36	1	95	3.46657e-07	95	6.93314e-07	95	7.29804e-09	1.06776e-07
	6.02	0.999999	101	0	101	0	101	0	0	6.34	1	96	4.10008e-07	96	8.20016e-07	96	8.54183e-09	1.2657e-07
	6	0.999999	105	0	105	0	105	0	0	6.21	0.999999	97	4.84844e-07	97	9.69688e-07	97	9.99679e-09	1.49524e-07
	5.8	0.999998	106	0	106	0	106	0	0	6.18	0.999999	98	5.72954e-07	98	1.14591e-06	98	1.16929e-08	1.76052e-07
	5.72	0.999998	107	0	107	0	107	0	0	6.14	0.999999	99	6.76354e-07	99	1.35271e-06	99	1.36637e-08	2.06612e-07
	5.71	0.999998	108	0	108	0	108	0	0	6.04	0.999999	100	7.97312e-07	100	1.59462e-06	100	1.59462e-08	2.41704e-07
	5.68	0.999998	109	0	109	0	109	0	0	6.02	0.999999	101	9.38369e-07	101	1.87674e-06	101	1.85816e-08	2.81877e-07
	5.65	0.999998	110	0	110	0	110	0	0	6	0.999999	102	1.10237e-06	102	2.20473e-06	102	2.1615e-08	4.08605e-07
	5.59	0.999997	111	0	111	0	111	0	0	6	0.999999	103	1.29247e-06	103	2.58494e-06	103	2.50965e-08	4.08605e-07
	5.57	0.999997	112	0	112	0	112	0	0	6	0.999999	104	1.51221e-06	104	3.02441e-06	104	2.90809e-08	4.08605e-07
	5.56	0.999997	113	0	113	0	113	0	0	6	0.999999	105	1.76548e-06	105	3.53096e-06	105	3.36282e-08	4.08605e-07
	5.54	0.999997	114	0	114	0	114	0	0	5.8	0.999998	106	2.05661e-06	106	4.11322e-06	106	3.8804e-08	5.81863e-07
	5.42	0.999996	116	0	116	0	116	0	0	5.72	0.999998	107	2.39037e-06	107	4.78073e-06	107	4.46798e-08	6.67077e-07
	5.39	0.999996	117	0	117	0	117	0	0	5.71	0.999998	108	2.772e-06	108	5.544e-06	108	5.13334e-08	7.62791e-07
	5.37	0.999996	118	0	118	0	118	0	0	5.68	0.999998	109	3.20729e-06	109	6.41457e-06	109	5.88493e-08	8.70039e-07
	5.23	0.999994	119	0	119	0	119	0	0	5.65	0.999998	110	3.70254e-06	110	7.40508e-06	110	6.73189e-08	9.89929e-07
	5.19	0.999994	120	0	120	0	120	0	0	5.59	0.999997	111	4.26468e-06	111	8.52935e-06	111	7.6841e-08	1.12365e-06
	5.08	0.999992	121	0	121	0	121	0	0	5.57	0.999997	112	4.90125e-06	112	9.8025e-06	112	8.75223e-08	1.27246e-06
	5.06	0.999991	122	0	122	0	122	0	0	5.56	0.999997	113	5.62048e-06	113	1.1241e-05	113	9.94776e-08	1.43772e-06
	5.03	0.999991	123	0	123	0	123	0	0	5.54	0.999997	114	6.43131e-06	114	1.28626e-05	114	1.1283e-07	1.62085e-06
	5.02	0.99999	124	0	124	0	124	0	0	5.42	0.999996	115	7.34344e-06	115	1.46869e-05	115	1.27712e-07	1.93242e-06
	4.92	0.999988	125	0	125	0	125	0	0	5.42	0.999996	116	8.36737e-06	116	1.67347e-05	116	1.44265e-07	1.93242e-06
	4.89	0.999987	126	0	126	0	126	0	0	5.39	0.999996	117	9.51447e-06	117	1.90289e-05	117	1.62641e-07	2.29317e-06
	4.86	0.999986	127	0	127	0	127	0	0	5.37	0.999996	118	1.0797e-05	118	2.1594e-05	118	1.83e-07	2.56394e-06
	4.79	0.999984	128	0	128	0	128	0	0	5.23	0.999994	119	1.22281e-05	119	2.44563e-05	119	2.05515e-07	2.86112e-06
	4.77	0.999983	129	0	129	0	129	0	0	5.19	0.999994	120	1.38221e-05	120	2.76443e-05	120	2.30369e-07	3.18671e-06
	4.67	0.999979	130	0	130	0	130	0	0	5.08	0.999992	121	1.55942e-05	121	3.11884e-05	121	2.57756e-07	3.54281e-06
	4.66	0.999978	131	0	131	0	131	0	0	5.06	0.999991	122	1.75608e-05	122	3.51215e-05	122	2.87881e-07	3.93161e-06
	4.6	0.999975	132	0	132	0	132	0	0	5.03	0.999991	123	1.97393e-05	123	3.94785e-05	123	3.20963e-07	4.35544e-06
	4.56	0.999972	133	0	133	0	133	0	0	5.02	0.99999	124	2.21484e-05	124	4.42969e-05	124	3.57233e-07	4.8167e-06
	4.52	0.99997	134	0	134	0	134	0	0	4.92	0.999988	125	2.48083e-05	125	4.96166e-05	125	3.96933e-07	5.31792e-06
	4.48	0.999967	135	0	135	0	135	0	0	4.89	0.999987	126	2.77401e-05	126	5.54802e-05	126	4.40319e-07	5.86173e-06
	4.46	0.999965	136	0	136	0	136	0	0	4.86	0.999986	127	3.09665e-05	127	6.19331e-05	127	4.87662e-07	6.45088e-06
	4.44	0.999964	137	0	137	0	137	0	0	4.79	0.999984	128	3.45117e-05	128	6.90234e-05	128	5.39246e-07	7.08822e-06
	4.41	0.999961	138	0	138	0	138	0	0	4.77	0.999983	129	3.84012e-05	129	7.68024e-05	129	5.95368e-07	7.77673e-06
	4.38	0.999958	139	0	139	0	139	0	0	4.67	0.999979	130	4.26622e-05	130	8.53243e-05	130	6.56341e-07	8.51949e-06
	4.34	0.999954	142	0	142	0	142	0	0	4.66	0.999978	131	4.73233e-05	131	9.46465e-05	131	7.22493e-07	9.3197e-06
	4.28	0.999948	143	0	143	0	143	0	0	4.6	0.999975	132	5.24149e-05	132	0.00010483	132	7.94166e-07	1.01807e-05
	4.26	0.999945	144	0	144	0	144	0	0	4.56	0.999972	133	5.79693e-05	133	0.000115939	133	8.71718e-07	1.11058e-05
	4.24	0.999942	146	0	146	0	146	0	0	4.52	0.99997	134	6.40201e-05	134	0.00012804	134	9.55524e-07	1.20987e-05
	4.19	0.999935	147	0	147	0	147	0	0	4.48	0.999967	135	7.06032e-05	135	0.000141206	135	1.04597e-06	1.3163e-05
	4.14	0.999928	149	0	149	0	149	0	0	4.46	0.999965	136	7.77561e-05	136	0.000155512	136	1.14347e-06	1.43025e-05
	4.11	0.999922	150	0	150	0	150	0	0	4.44	0.999964	137	8.55184e-05	137	0.000171037	137	1.24844e-06	1.5521e-05
	4.09	0.999919	151	0	151	0	151	0	0	4.41	0.999961	138	9.39315e-05	138	0.000187863	138	1.36133e-06	1.68227e-05
	4.06	0.999913	152	0	152	0	152	0	0	4.38	0.999958	139	0.000103039	139	0.000206078	139	1.48258e-06	1.82115e-05
	4.05	0.999911	153	0	153	0	153	0	0	4.34	0.999954	140	0.000112887	140	0.000225774	140	1.61267e-06	2.12678e-05
	4.03	0.999907	154	0	154	0	154	0	0	4.34	0.999954	141	0.000123523	141	0.000247046	141	1.7521e-06	2.12678e-05
	4.02	0.999905	155	0	155	0	155	0	0	4.34	0.999954	142	0.000134997	142	0.000269994	142	1.90137e-06	2.12678e-05
	4.01	0.999902	157	0	157	0	157	0	0	4.28	0.999948	143	0.000147362	143	0.000294724	143	2.06101e-06	2.47251e-05
	4	0.9999	164	0	164	0	164	0	0	4.26	0.999945	144	0.000160672	144	0.000321344	144	2.23156e-06	2.66157e-05
	3.98	0.999895	165	0	165	0	165	0	0	4.24	0.999942	145	0.000174985	145	0.00034997	145	2.41359e-06	2.96673e-05
	3.96	0.99989	166	0	166	0	166	0	0	4.24	0.999942	146	0.00019036	146	0.00038072	146	2.60767e-06	2.96673e-05
	3.81	0.999845	167	0	167	0	167	0	0	4.19	0.999935	147	0.000206859	147	0.000413718	147	2.81441e-06	3.29928e-05
	3.73	0.999814	168	0	168	0	168	0	0	4.14	0.999928	148	0.000224547	148	0.000449094	148	3.03442e-06	3.66092e-05
	3.71	0.999805	170	0	170	0	170	0	0	4.14	0.999928	149	0.000243491	149	0.000486982	149	3.26834e-06	3.66092e-05
	3.68	0.999791	171	0	171	0	171	0	0	4.11	0.999922	150	0.000263761	149.999	0.000527522	150	3.51681e-06	4.05342e-05
	3.59	0.999743	173	0	173	0	173	0	0	4.09	0.999919	151	0.00028543	150.999	0.00057086	151	3.78053e-06	4.33313e-05
	3.51	0.999691	176	0	176	0	176	0	0	4.06	0.999913	152	0.000308573	151.999	0.000617145	152	4.06017e-06	4.62791e-05
	3.5	0.999684	177	0	177	0	177	0	0	4.05	0.999911	153	0.000333268	152.999	0.000666536	153	4.35644e-06	4.93833e-05
	3.45	0.999645	178	0	178	0	178	0	0	4.03	0.999907	154	0.000359596	153.999	0.000719192	154	4.67008e-06	5.26496e-05
	3.44	0.999637	179	0	179	0	179	0	0	4.02	0.999905	155	0.000387641	154.999	0.000775283	155	5.00183e-06	5.60837e-05
	3.43	0.999628	180	0	180	0	180	0	0	4.01	0.999902	156	0.000417491	155.999	0.000834982	156	5.35245e-06	6.15624e-05
	3.36	0.999563	181	0	181	0	181	0	0	4.01	0.999902	157	0.000449234	156.999	0.000898469	157	5.72273e-06	6.15624e-05
	3.35	0.999553	182	0	182	0	182	0	0	4	0.9999	158	0.000482964	157.999	0.000965929	158	6.11347e-06	8.05484e-05
	3.34	0.999543	183	0	183	0	183	0	0	4	0.9999	158.999	0.000518777	158.999	0.00103755	159	6.5255e-06	8.05484e-05
	3.29	0.999487	184	0	184	0	184	0	0	4	0.9999	159.999	0.000556772	159.999	0.00111354	160	6.95965e-06	8.05484e-05
	3.21	0.999383	185	0	185	0	185	0	0	4	0.9999	160.999	0.000597051	160.999	0.0011941	161	7.41678e-06	8.05484e-05
	3.2	0.999369	186	0	186	0	186	0	0	4	0.9999	161.999	0.000639719	161.999	0.00127944	162	7.89776e-06	8.05484e-05
	3.19	0.999354	187	0	187	0	187	0	0	4	0.9999	162.999	0.000684885	162.999	0.00136977	163	8.40349e-06	8.05484e-05
	3.17	0.999324	188	0	188	0	188	0	0	4	0.9999	163.999	0.000732661	163.999	0.00146532	164	8.93488e-06	8.05484e-05
	3.13	0.999259	189	0	189	0	189	0	0	3.98	0.999895	164.999	0.000783162	164.998	0.00156632	165	9.49287e-06	0.000100992
	3.12	0.999241	191	0	191	0	191	0	0	3.96	0.99989	165.999	0.000836506	165.998	0.00167301	166	1.00784e-05	0.000106679
	3.1	0.999206	192	0	192	0	192	0	0	3.81	0.999845	166.999	0.000892817	166.998	0.00178563	167	1.06924e-05	0.00011261
	3.05	0.999109	193	0	193	0	193	0	0	3.73	0.999814	167.999	0.000952218	167.998	0.00190444	168	1.13359e-05	0.000118792
	3.04	0.999088	194	0	194	0	194	0	0	3.71	0.999805	168.999	0.00101484	168.998	0.00202968	169	1.20099e-05	0.000128549
	3.03	0.999067	196	0	196	0	196	0	0	3.71	0.999805	169.999	0.00108081	169.998	0.00216162	170	1.27154e-05	0.000128549
	3	0.999	197	0	197	0	197	0	0	3.68	0.999791	170.999	0.00115027	170.998	0.00230055	171	1.34535e-05	0.00013891
	2.96	0.998904	198	0	198	0	198	0	0	3.59	0.999743	171.999	0.00122336	171.998	0.00244672	172	1.42251e-05	0.000149897
	2.9	0.998741	199	0	199	0	199	0	0	3.59	0.999743	172.999	0.00130022	172.997	0.00260044	173	1.50314e-05	0.000149897
	2.89	0.998712	200	0	200	0	200	0	0	3.51	0.999691	173.999	0.00138099	173.997	0.00276198	174	1.58735e-05	0.000169666
	2.88	0.998682	201	0	201	0	201	0	0	3.51	0.999691	174.999	0.00146583	174.997	0.00293166	175	1.67523e-05	0.000169666
	2.75	0.998222	202	0	202	0	202	0	0	3.51	0.999691	175.998	0.00155489	175.997	0.00310978	176	1.76692e-05	0.000169666
	2.72	0.998095	203	0	203	0	203	0	0	3.5	0.999684	176.998	0.00164833	176.997	0.00329665	177	1.86252e-05	0.00018686
	2.68	0.997911	204	0	204	0	204	0	0	3.45	0.999645	177.998	0.0017463	177.997	0.0034926	178	1.96214e-05	0.000195936
	2.67	0.997862	205	0	205	0	205	0	0	3.44	0.999637	178.998	0.00184898	178.996	0.00369796	179	2.0659e-05	0.000205342
	2.65	0.997761	206	0	206	0	206	0	0	3.43	0.999628	179.998	0.00195653	179.996	0.00391306	180	2.17392e-05	0.000215085
	2.63	0.997656	207	0	207	0	207	0	0	3.36	0.999563	180.998	0.00206912	180.996	0.00413825	181	2.28632e-05	0.000225173
	2.54	0.997116	208	0	208	0	208	0	0	3.35	0.999553	181.998	0.00218694	181.996	0.00437387	182	2.40323e-05	0.000235612
	2.52	0.99698	210	0	210	0	210	0	0	3.34	0.999543	182.998	0.00231015	182.995	0.0046203	183	2.52475e-05	0.000246412
	2.51	0.99691	211	0	211	0	211	0	0	3.29	0.999487	183.998	0.00243895	183.995	0.0048779	184	2.65103e-05	0.00025758
	2.49	0.996764	212	0	212	0	212	0	0	3.21	0.999383	184.997	0.00257352	184.995	0.00514703	185	2.78218e-05	0.000269122
	2.44	0.996369	213	0	213	0	213	0	0	3.2	0.999369	185.997	0.00271405	185.995	0.0054281	186	2.91833e-05	0.000281049
	2.42	0.996198	214	0	214	0	214	0	0	3.19	0.999354	186.997	0.00286074	186.994	0.00572148	187	3.05962e-05	0.000293366
	2.41	0.99611	215	0	215	0	215	0	0	3.17	0.999324	187.997	0.00301379	187.994	0.00602758	188	3.20616e-05	0.000306082
	2.4	0.996019	216	0	216	0	216	0	0	3.13	0.999259	188.997	0.0031734	188.994	0.0063468	189	3.3581e-05	0.000319205
	2.39	0.995926	217	0	217	0	217	0	0	3.12	0.999241	189.997	0.00333978	189.993	0.00667956	190	3.51556e-05	0.000339671
	2.36	0.995635	218	0	218	0	218	0	0	3.12	0.999241	190.996	0.00351314	190.993	0.00702629	191	3.67868e-05	0.000339671
	2.34	0.995429	219	0	219	0	219	0	0	3.1	0.999206	191.996	0.0036937	191.993	0.00738741	192	3.84761e-05	0.000361099
	2.32	0.995214	221	0	221	0	221	0	0	3.05	0.999109	192.996	0.00388168	192.992	0.00776335	193	4.02246e-05	0.000375931
	2.31	0.995102	222	0	222	0	222	0	0	3.04	0.999088	193.996	0.00407729	193.992	0.00815459	194	4.20339e-05	0.000391212
	2.3	0.994988	223	0	223	0	223	0	0	3.03	0.999067	194.996	0.00428078	194.991	0.00856155	195	4.39054e-05	0.00041499
	2.27	0.99463	224	0	224	0	224	0	0	3.03	0.999067	195.996	0.00449236	195.991	0.00898472	196	4.58404e-05	0.00041499
	2.26	0.994505	225	0	225	0	225	0	0	3	0.999	196.995	0.00471228	196.991	0.00942457	197	4.78404e-05	0.000439824
	2.25	0.994377	227	0	227	0	227	0	0	2.96	0.998904	197.995	0.00494078	197.99	0.00988157	198	4.99069e-05	0.00045698
	2.22	0.993974	228	0	228	0	228	0	0	2.9	0.998741	198.995	0.00517811	198.99	0.0103562	199	5.20413e-05	0.000474626
	2.21	0.993834	229	0	229	0	229	0	0	2.89	0.998712	199.995	0.0054245	199.989	0.010849	200	5.4245e-05	0.000492772
	2.2	0.99369	230	0	230	0	230	0	0	2.88	0.998682	200.994	0.00568023	200.989	0.0113605	201	5.65197e-05	0.000511425
	2.19	0.993543	232	0	232	0	232	0	0	2.75	0.998222	201.994	0.00594553	201.988	0.0118911	202	5.88667e-05	0.000530594
	2.18	0.993393	234	0	234	0	234	0	0	2.72	0.998095	202.994	0.00622069	202.988	0.0124414	203	6.12876e-05	0.00055029
	2.15	0.992921	235	0	235	0	235	0	0	2.68	0.997911	203.993	0.00650596	203.987	0.0130119	204	6.37839e-05	0.00057052
	2.14	0.992756	237	0	237	0	237	0	0	2.67	0.997862	204.993	0.00680162	204.986	0.0136032	205	6.63573e-05	0.000591293
	2.13	0.992587	239	0	239	0	239	0	0	2.65	0.997761	205.993	0.00710794	205.986	0.0142159	206	6.90091e-05	0.00061262
	2.12	0.992414	240	0	240	0	240	0	0	2.63	0.997656	206.993	0.00742521	206.985	0.0148504	207	7.17411e-05	0.000634509
	2.11	0.992238	242	0	242	0	242	0	0	2.54	0.997116	207.992	0.00775371	207.984	0.0155074	208	7.45549e-05	0.00065697
	2.1	0.992057	243	0	243	0	243	0	0	2.52	0.99698	208.992	0.00809372	208.984	0.0161874	209	7.74519e-05	0.000691754
	2.09	0.991872	245	0	245	0	245	0	0	2.52	0.99698	209.992	0.00844556	209.983	0.0168911	210	8.04339e-05	0.000691754
	2.08	0.991682	249	0	249	0	249	0	0	2.51	0.99691	210.991	0.00880951	210.982	0.017619	211	8.35025e-05	0.000727879
	2.07	0.991489	254	0	254	0	254	0	0	2.49	0.996764	211.991	0.00918589	211.982	0.0183718	212	8.66593e-05	0.000752724
	2.04	0.99088	256	0	256	0	256	0	0	2.44	0.996369	212.99	0.00957499	212.981	0.01915	213	8.9906e-05	0.00077819
	2.03	0.990667	260	0	260	0	260	0	0	2.42	0.996198	213.99	0.00997715	213.98	0.0199543	214	9.32444e-05	0.000804287
	2.02	0.99045	268	0	268	0	268	0	0	2.41	0.99611	214.99	0.0103927	214.979	0.0207854	215	9.66761e-05	0.000831025
	2.01	0.990228	272	0	272	0	272	0	0	2.4	0.996019	215.989	0.0108219	215.978	0.0216438	216	0.000100203	0.000858415
	2	0.99	348	1	347	2	349	0.00573066	0.00514139	2.39	0.995926	216.989	0.0112651	216.977	0.0225303	217	0.000103826	0.000886468
	1.89	0.987118	349	1	348	2	350	0.00571429	0.00514139	2.36	0.995635	217.988	0.0117228	217.977	0.0234455	218	0.000107548	0.000915194
	1.88	0.986817	350	1	349	2	351	0.00569801	0.00514139	2.34	0.995429	218.988	0.0121951	218.976	0.0243901	219	0.000111371	0.000944604
	1.86	0.986196	351	1	350	2	352	0.00568182	0.00514139	2.32	0.995214	219.987	0.0126824	219.975	0.0253649	220	0.000115295	0.000990028
	1.82	0.984864	353	1	352	2	354	0.00564972	0.00514139	2.32	0.995214	220.987	0.0131852	220.974	0.0263704	221	0.000119323	0.000990028
	1.81	0.984512	354	1	353	2	355	0.0056338	0.00514139	2.31	0.995102	221.986	0.0137038	221.973	0.0274075	222	0.000123457	0.00103706
	1.78	0.983404	355	1	354	2	356	0.00561798	0.00514139	2.3	0.994988	222.986	0.0142384	222.972	0.0284769	223	0.000127699	0.00106932
	1.75	0.982217	356	1	355	2	357	0.00560224	0.00514139	2.27	0.99463	223.985	0.0147896	223.97	0.0295792	224	0.00013205	0.00110232
	1.68	0.979107	357	1	356	2	358	0.00558659	0.00514139	2.26	0.994505	224.985	0.0153577	224.969	0.0307153	225	0.000136513	0.00113608
	1.66	0.978122	360	1	359	2	361	0.00554017	0.00514139	2.25	0.994377	225.984	0.015943	225.968	0.031886	226	0.000141088	0.00118816
	1.62	0.976012	361	1	360	2	362	0.00552486	0.00514139	2.25	0.994377	226.983	0.016546	226.967	0.0330919	227	0.000145779	0.00118816
	1.59	0.974296	363	1	362	2	364	0.00549451	0.00514139	2.22	0.993974	227.983	0.017167	227.966	0.034334	228	0.000150588	0.00124201
	1.57	0.973085	364	1	363	2	365	0.00547945	0.00514139	2.21	0.993834	228.982	0.0178065	228.964	0.0356129	229	0.000155515	0.00127892
	1.54	0.97116	365	1	364	2	366	0.00546448	0.00514139	2.2	0.99369	229.982	0.0184648	229.963	0.0369296	230	0.000160564	0.00131664
	1.52	0.9698	367	1	366	2	368	0.00543478	0.00514139	2.19	0.993543	230.981	0.0191424	230.962	0.0382848	231	0.000165735	0.0013748
	1.49	0.967641	369	1	368	2	370	0.00540541	0.00514139	2.19	0.993543	231.98	0.0198397	231.96	0.0396795	232	0.000171032	0.0013748
	1.48	0.966887	370	1	369	2	371	0.00539084	0.00514139	2.18	0.993393	232.979	0.0205572	232.959	0.0411144	233	0.000176457	0.00145533
	1.47	0.966116	371	1	370	2	372	0.00537634	0.00514139	2.18	0.993393	233.979	0.0212952	233.957	0.0425904	234	0.00018201	0.00145533
	1.45	0.964519	372	1	371	2	373	0.00536193	0.00514139	2.15	0.992921	234.978	0.0220543	234.956	0.0441085	235	0.000187696	0.00151805
	1.42	0.961981	373	1	372	2	374	0.00534759	0.00514139	2.14	0.992756	235.977	0.0228348	235.954	0.0456696	236	0.000193515	0.00158281
	1.4	0.960189	376	1	375	2	377	0.00530504	0.00514139	2.14	0.992756	236.976	0.0236372	236.953	0.0472745	237	0.00019947	0.00158281
	1.39	0.959262	377	1	376	2	378	0.00529101	0.00514139	2.13	0.992587	237.976	0.0244621	237.951	0.0489242	238	0.000205564	0.00167242
	1.38	0.958313	379	1	378	2	380	0.00526316	0.00514139	2.13	0.992587	238.975	0.0253098	238.949	0.0506196	239	0.000211798	0.00167242
	1.35	0.955332	380	1	379	2	381	0.00524934	0.00514139	2.12	0.992414	239.974	0.0261809	239.948	0.0523618	240	0.000218174	0.00174215
	1.34	0.954291	381	1	380	2	382	0.0052356	0.00514139	2.11	0.992238	240.973	0.0270759	240.946	0.0541517	241	0.000224696	0.0018141
	1.32	0.952137	383	1	382	2	384	0.00520833	0.00514139	2.11	0.992238	241.972	0.0279952	241.944	0.0559904	242	0.000231365	0.0018141
	1.31	0.951022	384	1	383	2	385	0.00519481	0.00514139	2.1	0.992057	242.971	0.0289394	242.942	0.0578787	243	0.000238184	0.00188834
	1.28	0.947519	385	1	384	2	386	0.00518135	0.00514139	2.09	0.991872	243.97	0.029909	243.94	0.0598179	244	0.000245155	0.00196493
	1.25	0.943766	386	1	385	2	387	0.00516796	0.00514139	2.09	0.991872	244.969	0.0309045	244.938	0.061809	245	0.000252281	0.00196493
	1.21	0.938341	387	1	386	2	388	0.00515464	0.00514139	2.08	0.991682	245.968	0.0319265	245.936	0.0638529	246	0.000259565	0.00212542
	1.14	0.927556	388	1	387	2	389	0.00514139	0.00514139	2.08	0.991682	246.967	0.0329755	246.934	0.065951	247	0.000267008	0.00212542
	1.12	0.924142	388	2	386	4	390	0.0102564	0.00995025	2.08	0.991682	247.966	0.0340521	247.932	0.0681042	248	0.000274614	0.00212542
	1.11	0.922375	390	2	388	4	392	0.0102041	0.00995025	2.08	0.991682	248.965	0.0351568	248.93	0.0703137	249	0.000282384	0.00212542
	1.1	0.920567	391	2	389	4	393	0.0101781	0.00995025	2.07	0.991489	249.964	0.0362903	249.927	0.0725806	250	0.000290322	0.00238545
	1.08	0.916824	392	2	390	4	394	0.0101523	0.00995025	2.07	0.991489	250.963	0.0374531	250.925	0.0749062	251	0.000298431	0.00238545
	1.07	0.914886	393	2	391	4	395	0.0101266	0.00995025	2.07	0.991489	251.961	0.0386459	251.923	0.0772918	252	0.000306713	0.00238545
	1.06	0.912904	394	2	392	4	396	0.010101	0.00995025	2.07	0.991489	252.96	0.0398692	252.92	0.0797384	253	0.000315171	0.00238545
	1.05	0.910875	396	2	394	4	398	0.0100503	0.00995025	2.07	0.991489	253.959	0.0411237	253.918	0.0822473	254	0.000323808	0.00238545
	0.97	0.892848	397	2	395	4	399	0.0100251	0.00995025	2.04	0.99088	254.958	0.04241	254.915	0.0848199	255	0.000332627	0.00260487
	0.96	0.890352	398	2	396	4	400	0.01	0.00995025	2.04	0.99088	255.956	0.0437288	255.913	0.0874575	256	0.000341631	0.00260487
	0.95	0.887798	399	2	397	4	401	0.00997506	0.00995025	2.03	0.990667	256.955	0.0450807	256.91	0.0901614	257	0.000350822	0.00280578
	0.93	0.88251	400	2	398	4	402	0.00995025	0.00995025	2.03	0.990667	257.954	0.0464664	257.907	0.0929328	258	0.000360205	0.00280578
	0.92	0.879774	400	3	397	6	403	0.0148883	0.0143541	2.03	0.990667	258.952	0.0478867	258.904	0.0957734	259	0.000369781	0.00280578
	0.9	0.874107	401	3	398	6	404	0.0148515	0.0143541	2.03	0.990667	259.951	0.0493422	259.901	0.0986844	260	0.000379555	0.00280578
	0.89	0.871175	403	3	400	6	406	0.0147783	0.0143541	2.02	0.99045	260.949	0.0508336	260.898	0.101667	261	0.00038953	0.00324624
	0.87	0.865104	404	3	401	6	407	0.014742	0.0143541	2.02	0.99045	261.948	0.0523617	261.895	0.104723	262	0.000399708	0.00324624
	0.86	0.861962	405	3	402	6	408	0.0147059	0.0143541	2.02	0.99045	262.946	0.0539273	262.892	0.107855	263	0.000410093	0.00324624
	0.85	0.858746	406	3	403	6	409	0.0146699	0.0143541	2.02	0.99045	263.944	0.055531	263.889	0.111062	264	0.00042069	0.00324624
	0.82	0.848644	408	3	405	6	411	0.0145985	0.0143541	2.02	0.99045	264.943	0.0571738	264.886	0.114348	265	0.0004315	0.00324624
	0.8	0.841511	409	3	406	6	412	0.0145631	0.0143541	2.02	0.99045	265.941	0.0588563	265.882	0.117713	266	0.000442529	0.00324624
	0.79	0.837819	410	3	407	6	413	0.0145278	0.0143541	2.02	0.99045	266.939	0.0605795	266.879	0.121159	267	0.000453779	0.00324624
	0.78	0.834041	411	3	408	6	414	0.0144928	0.0143541	2.02	0.99045	267.938	0.0623441	267.875	0.124688	268	0.000465254	0.00324624
	0.77	0.830176	412	3	409	6	415	0.0144578	0.0143541	2.01	0.990228	268.936	0.0641509	268.872	0.128302	269	0.000476959	0.00374385
	0.76	0.82622	414	3	411	6	417	0.0143885	0.0143541	2.01	0.990228	269.934	0.066001	269.868	0.132002	270	0.000488896	0.00374385
	0.74	0.81803	415	3	412	6	418	0.0143541	0.0143541	2.01	0.990228	270.932	0.0678951	270.864	0.13579	271	0.000501071	0.00374385
	0.73	0.813791	416	4	412	8	420	0.0190476	0.0182648	2.01	0.990228	271.93	0.0698342	271.86	0.139668	272	0.000513486	0.00374385
	0.71	0.805016	417	4	413	8	421	0.0190024	0.0182648	2	0.99	272.928	0.0718191	272.856	0.143638	273	0.000526147	0.00938102
	0.66	0.781224	422	4	418	8	426	0.0187793	0.0182648	2	0.99	273.926	0.073851	273.852	0.147702	274	0.000539058	0.00938102
	0.64	0.770913	423	4	419	8	427	0.0187354	0.0182648	2	0.99	274.924	0.0759306	274.848	0.151861	275	0.000552223	0.00938102
	0.62	0.760117	424	4	420	8	428	0.0186916	0.0182648	2	0.99	275.922	0.0780591	275.844	0.156118	276	0.000565645	0.00938102
	0.61	0.754529	426	4	422	8	430	0.0186047	0.0182648	2	0.99	276.92	0.0802374	276.84	0.160475	277	0.000579331	0.00938102
	0.6	0.748811	428	4	424	8	432	0.0185185	0.0182648	2	0.99	277.918	0.0824666	277.835	0.164933	278	0.000593285	0.00938102
	0.59	0.74296	430	4	426	8	434	0.0184332	0.0182648	2	0.99	278.915	0.0847477	278.831	0.169495	279	0.00060751	0.00938102
	0.58	0.736973	431	4	427	8	435	0.0183908	0.0182648	2	0.99	279.913	0.0870818	279.826	0.174164	280	0.000622013	0.00938102
	0.57	0.730847	433	4	429	8	437	0.0183066	0.0182648	2	0.99	280.911	0.0894701	280.821	0.17894	281	0.000636798	0.00938102
	0.56	0.724577	434	4	430	8	438	0.0182648	0.0182648	2	0.99	281.908	0.0919137	281.816	0.183827	282	0.00065187	0.00938102
	0.55	0.718162	435	5	430	10	440	0.0227273	0.0221729	2	0.99	282.906	0.0944137	282.811	0.188827	283	0.000667235	0.00938102
	0.53	0.704879	437	5	432	10	442	0.0226244	0.0221729	2	0.99	283.903	0.0969713	283.806	0.193943	284	0.000682897	0.00938102
	0.52	0.698005	440	5	435	10	445	0.0224719	0.0221729	2	0.99	284.9	0.0995879	284.801	0.199176	285	0.000698862	0.00938102
	0.49	0.676406	442	5	437	10	447	0.0223714	0.0221729	2	0.99	285.898	0.102264	285.795	0.204529	286	0.000715136	0.00938102
	0.48	0.668869	445	5	440	10	450	0.0222222	0.0221729	2	0.99	286.895	0.105003	286.79	0.210005	287	0.000731725	0.00938102
	0.47	0.661156	446	5	441	10	451	0.0221729	0.0221729	2	0.99	287.892	0.107803	287.784	0.215607	288	0.000748634	0.00938102
	0.46	0.653263	447	6	441	12	453	0.0264901	0.0264901	2	0.99	288.889	0.110668	288.779	0.221336	289	0.000765869	0.00938102
	0.45	0.645187	450	7	443	14	457	0.0306346	0.0297872	2	0.99	289.886	0.113598	289.773	0.227197	290	0.000783436	0.00938102
	0.43	0.628465	453	7	446	14	460	0.0304348	0.0297872	2	0.99	290.883	0.116595	290.767	0.233191	291	0.000801342	0.00938102
	0.41	0.610955	454	7	447	14	461	0.0303688	0.0297872	2	0.99	291.88	0.119661	291.761	0.239321	292	0.000819593	0.00938102
	0.4	0.601893	457	7	450	14	464	0.0301724	0.0297872	2	0.99	292.877	0.122796	292.754	0.245591	293	0.000838196	0.00938102
	0.39	0.59262	459	7	452	14	466	0.0300429	0.0297872	2	0.99	293.874	0.126002	293.748	0.252004	294	0.000857157	0.00938102
	0.38	0.583131	463	7	456	14	470	0.0297872	0.0297872	2	0.99	294.871	0.129281	294.741	0.258562	295	0.000876483	0.00938102
	0.37	0.57342	466	9	457	18	475	0.0378947	0.0377358	2	0.99	295.867	0.132635	295.735	0.26527	296	0.000896181	0.00938102
	0.36	0.563484	468	9	459	18	477	0.0377358	0.0377358	2	0.99	296.864	0.136064	296.728	0.272129	297	0.000916259	0.00938102
	0.35	0.553316	470	10	460	20	480	0.0416667	0.0416667	2	0.99	297.86	0.139572	297.721	0.279144	298	0.000936724	0.00938102
	0.34	0.542912	474	11	463	22	485	0.0453608	0.0447154	2	0.99	298.857	0.143159	298.714	0.286317	299	0.000957583	0.00938102
	0.33	0.532265	478	11	467	22	489	0.0449898	0.0447154	2	0.99	299.853	0.146827	299.706	0.293653	300	0.000978844	0.00938102
	0.32	0.52137	481	11	470	22	492	0.0447154	0.0447154	2	0.99	300.849	0.150578	300.699	0.301155	301	0.00100052	0.00938102
	0.31	0.510221	482	12	470	24	494	0.048583	0.048583	2	0.99	301.846	0.154413	301.691	0.308827	302	0.0010226	0.00938102
	0.3	0.498813	485	13	472	26	498	0.0522088	0.0522088	2	0.99	302.842	0.158336	302.683	0.316672	303	0.00104512	0.00938102
	0.29	0.487139	487	15	472	30	502	0.059761	0.0596421	2	0.99	303.838	0.162347	303.675	0.324694	304	0.00106807	0.00938102
	0.28	0.475193	488	15	473	30	503	0.0596421	0.0596421	2	0.99	304.834	0.166449	304.667	0.332898	305	0.00109147	0.00938102
	0.27	0.462968	492	16	476	32	508	0.0629921	0.0629921	2	0.99	305.829	0.170643	305.659	0.341287	306	0.00111532	0.00938102
	0.26	0.450459	496	17	479	34	513	0.0662768	0.0655106	2	0.99	306.825	0.174933	306.65	0.349866	307	0.00113963	0.00938102
	0.25	0.437659	502	17	485	34	519	0.0655106	0.0655106	2	0.99	307.821	0.179319	307.641	0.358638	308	0.00116441	0.00938102
	0.24	0.42456	506	18	488	36	524	0.0687023	0.0684411	2	0.99	308.816	0.183805	308.632	0.367609	309	0.00118967	0.00938102
	0.23	0.411156	508	18	490	36	526	0.0684411	0.0684411	2	0.99	309.812	0.188391	309.623	0.376783	310	0.00121543	0.00938102
	0.22	0.39744	511	19	492	38	530	0.0716981	0.0712946	2	0.99	310.807	0.193082	310.614	0.386164	311	0.00124169	0.00938102
	0.21	0.383405	514	19	495	38	533	0.0712946	0.0712946	2	0.99	311.802	0.197879	311.604	0.395758	312	0.00126845	0.00938102
	0.2	0.369043	519	22	497	44	541	0.0813309	0.0813309	2	0.99	312.797	0.202784	312.594	0.405568	313	0.00129575	0.00938102
	0.19	0.354346	523	23	500	46	546	0.0842491	0.0842491	2	0.99	313.792	0.2078	313.584	0.415601	314	0.00132357	0.00938102
	0.18	0.339307	525	24	501	48	549	0.0874317	0.0874317	2	0.99	314.787	0.21293	314.574	0.425861	315	0.00135194	0.00938102
	0.17	0.323917	528	26	502	52	554	0.0938628	0.0930233	2	0.99	315.782	0.218177	315.564	0.436353	316	0.00138087	0.00938102
	0.16	0.308169	533	26	507	52	559	0.0930233	0.0930233	2	0.99	316.776	0.223542	316.553	0.447084	317	0.00141036	0.00938102
	0.15	0.292054	538	28	510	56	566	0.0989399	0.0989399	2	0.99	317.771	0.229029	317.542	0.458058	318	0.00144043	0.00938102
	0.14	0.275564	543	29	514	58	572	0.101399	0.101399	2	0.99	318.765	0.234641	318.531	0.469281	319	0.0014711	0.00938102
	0.13	0.25869	548	30	518	60	578	0.103806	0.103806	2	0.99	319.76	0.24038	319.519	0.48076	320	0.00150237	0.00938102
	0.12	0.241422	552	33	519	66	585	0.112821	0.112821	2	0.99	320.754	0.24625	320.508	0.492499	321	0.00153427	0.00938102
	0.11	0.223753	564	34	530	68	598	0.113712	0.113712	2	0.99	321.748	0.252253	321.495	0.504506	322	0.00156679	0.00938102
	0.1	0.205672	570	36	534	72	606	0.118812	0.118812	2	0.99	322.742	0.258393	322.483	0.516787	323	0.00159996	0.00938102
	0.09	0.187169	582	41	541	82	623	0.131621	0.131621	2	0.99	323.735	0.264674	323.471	0.529347	324	0.00163379	0.00938102
	0.08	0.168236	596	47	549	94	643	0.14619	0.14619	2	0.99	324.729	0.271097	324.458	0.542195	325	0.00166829	0.00938102
	0.07	0.148862	605	60	545	120	665	0.180451	0.180451	2	0.99	325.722	0.277668	325.445	0.555336	326	0.00170349	0.00938102
	0.06	0.129036	620	74	546	148	694	0.213256	0.213256	2	0.99	326.716	0.284389	326.431	0.568778	327	0.00173938	0.00938102
	0.05	0.108749	640	87	553	174	727	0.23934	0.23934	2	0.99	327.709	0.291264	327.417	0.582528	328	0.001776	0.00938102
										2	0.99	328.702	0.298297	328.403	0.596594	329	0.00181335	0.00938102
										2	0.99	329.695	0.305491	329.389	0.610982	330	0.00185146	0.00938102
										2	0.99	330.687	0.312851	330.374	0.625701	331	0.00189034	0.00938102
										2	0.99	331.68	0.32038	331.359	0.640759	332	0.00193	0.00938102
										2	0.99	332.672	0.328082	332.344	0.656165	333	0.00197046	0.00938102
										2	0.99	333.664	0.335963	333.328	0.671926	334	0.00201175	0.00938102
										2	0.99	334.656	0.344026	334.312	0.688051	335	0.00205388	0.00938102
										2	0.99	335.648	0.352275	335.295	0.70455	336	0.00209687	0.00938102
										2	0.99	336.639	0.360715	336.279	0.721431	337	0.00214074	0.00938102
										2	0.99	337.631	0.369352	337.261	0.738704	338	0.00218551	0.00938102
										2	0.99	338.622	0.378189	338.244	0.756378	339	0.0022312	0.00938102
										2	0.99	339.613	0.387232	339.226	0.774464	340	0.00227784	0.00938102
										2	0.99	340.604	0.396486	340.207	0.792972	341	0.00232543	0.00938102
										2	0.99	341.594	0.405956	341.188	0.811911	342	0.00237401	0.00938102
										2	0.99	342.584	0.415647	342.169	0.831294	343	0.0024236	0.00938102
										2	0.99	343.574	0.425565	343.149	0.851131	344	0.00247422	0.00938102
										2	0.99	344.564	0.435716	344.129	0.871433	345	0.00252589	0.00938102
										2	0.99	345.554	0.446106	345.108	0.892211	346	0.00257865	0.00938102
										2	0.99	346.543	0.456739	346.087	0.913479	347	0.0026325	0.00938102
										2	0.99	347.532	0.467624	347.065	0.935248	348	0.00268749	0.00938102
										2	0.99	348.521	0.478765	348.042	0.95753	349	0.00274364	0.00938102
										1.89	0.987118	349.51	0.490169	349.02	0.980339	350	0.00280097	0.0228083
										1.88	0.986817	350.498	0.501844	349.996	1.00369	351	0.00285951	0.0233481
										1.86	0.986196	351.486	0.513795	350.972	1.02759	352	0.00291929	0.0239015
										1.82	0.984864	352.474	0.52603	351.948	1.05206	353	0.00298034	0.0247579
										1.82	0.984864	353.461	0.538555	352.923	1.07711	354	0.00304268	0.0247579
										1.81	0.984512	354.449	0.551379	353.897	1.10276	355	0.00310636	0.0256469
										1.78	0.983404	355.435	0.564508	354.871	1.12902	356	0.0031714	0.0262583
										1.75	0.982217	356.422	0.577951	355.844	1.1559	357	0.00323782	0.0268852
										1.68	0.979107	357.408	0.591716	356.817	1.18343	358	0.00330567	0.0275279
										1.66	0.978122	358.394	0.605809	357.788	1.21162	359	0.00337498	0.0288625
										1.66	0.978122	359.38	0.620241	358.76	1.24048	360	0.00344578	0.0288625
										1.66	0.978122	360.365	0.635019	359.73	1.27004	361	0.00351811	0.0288625
										1.62	0.976012	361.35	0.650152	360.7	1.3003	362	0.003592	0.0302655
										1.59	0.974296	362.334	0.665649	361.669	1.3313	363	0.00366749	0.0313647
										1.59	0.974296	363.318	0.68152	362.637	1.36304	364	0.00374461	0.0313647
										1.57	0.973085	364.302	0.697773	363.604	1.39555	365	0.00382341	0.0325058
										1.54	0.97116	365.286	0.714419	364.571	1.42884	366	0.00390393	0.0332906
										1.52	0.9698	366.269	0.731467	365.537	1.46293	367	0.0039862	0.0345051
										1.52	0.9698	367.251	0.748927	366.502	1.49785	368	0.00407026	0.0345051
										1.49	0.967641	368.233	0.766811	367.466	1.53362	369	0.00415615	0.0361965
										1.49	0.967641	369.215	0.785127	368.43	1.57025	370	0.00424393	0.0361965
										1.48	0.966887	370.196	0.803888	369.392	1.60778	371	0.00433363	0.0375213
										1.47	0.966116	371.177	0.823105	370.354	1.64621	372	0.0044253	0.0384322
										1.45	0.964519	372.157	0.842788	371.314	1.68558	373	0.00451897	0.039366
										1.42	0.961981	373.137	0.86295	372.274	1.7259	374	0.00461471	0.040323
										1.4	0.960189	374.116	0.883603	373.233	1.76721	375	0.00471255	0.0423092
										1.4	0.960189	375.095	0.904758	374.19	1.80952	376	0.00481254	0.0423092
										1.4	0.960189	376.074	0.926428	375.147	1.85286	377	0.00491474	0.0423092
										1.39	0.959262	377.051	0.948626	376.103	1.89725	378	0.00501919	0.0443951
										1.38	0.958313	378.029	0.971365	377.057	1.94273	379	0.00512594	0.0460276
										1.38	0.958313	379.005	0.994658	378.011	1.98932	380	0.00523504	0.0460276
										1.35	0.955332	379.981	1.01852	378.963	2.03704	381	0.00534656	0.0477205
										1.34	0.954291	380.957	1.04296	379.914	2.08592	382	0.00546053	0.0488836
										1.32	0.952137	381.932	1.068	380.864	2.136	383	0.00557702	0.0506815
										1.32	0.952137	382.906	1.09365	381.813	2.1873	384	0.00569608	0.0506815
										1.31	0.951022	383.88	1.11992	382.76	2.23984	385	0.00581777	0.052545
										1.28	0.947519	384.853	1.14683	383.706	2.29367	386	0.00594215	0.0538246
										1.25	0.943766	385.826	1.1744	384.651	2.3488	387	0.00606926	0.0551348
										1.21	0.938341	386.797	1.20264	385.595	2.40528	388	0.00619918	0.0564761
										1.14	0.927556	387.768	1.23157	386.537	2.46313	389	0.00633196	0.0578491
										1.12	0.924142	388.739	1.26119	387.478	2.52239	390	0.00646766	0.0592544
										1.11	0.922375	389.708	1.29154	388.417	2.58308	391	0.00660635	0.0614239
										1.11	0.922375	390.677	1.32262	389.355	2.64525	392	0.00674808	0.0614239
										1.1	0.920567	391.646	1.35446	390.291	2.70892	393	0.00689292	0.0636691
										1.08	0.916824	392.613	1.38706	391.226	2.77413	394	0.00704093	0.0652089
										1.07	0.914886	393.58	1.42046	392.159	2.84091	395	0.00719218	0.0667836
										1.06	0.912904	394.545	1.45465	393.091	2.90931	396	0.00734674	0.0683938
										1.05	0.910875	395.51	1.48967	394.021	2.97935	397	0.00750466	0.0708768
										1.05	0.910875	396.474	1.52554	394.949	3.05107	398	0.00766602	0.0708768
										0.97	0.892848	397.438	1.56226	395.875	3.12452	399	0.00783087	0.0734424
										0.96	0.890352	398.4	1.59986	396.8	3.19972	400	0.0079993	0.0751996
										0.95	0.887798	399.362	1.63836	397.723	3.27672	401	0.00817136	0.0769946
										0.93	0.88251	400.322	1.67777	398.644	3.35554	402	0.00834713	0.0788279
										0.92	0.879774	401.282	1.71812	399.564	3.43625	403	0.00852667	0.0806999
										0.9	0.874107	402.241	1.75943	400.481	3.51886	404	0.00871005	0.0826111
										0.89	0.871175	403.198	1.80171	401.397	3.60342	405	0.00889734	0.0855519
										0.89	0.871175	404.155	1.84499	402.31	3.68998	406	0.00908861	0.0855519
										0.87	0.865104	405.111	1.88928	403.221	3.77856	407	0.00928393	0.0885825
										0.86	0.861962	406.065	1.93461	404.131	3.86922	408	0.00948337	0.0906534
										0.85	0.858746	407.019	1.98099	405.038	3.96198	409	0.009687	0.0927649
										0.82	0.848644	407.972	2.02845	405.943	4.0569	410	0.00989488	0.0960088
										0.82	0.848644	408.923	2.07701	406.846	4.15401	411	0.0101071	0.0960088
										0.8	0.841511	409.873	2.12668	407.747	4.25336	412	0.0103237	0.0993451
										0.79	0.837819	410.823	2.17749	408.645	4.35498	413	0.0105448	0.101621
										0.78	0.834041	411.771	2.22946	409.541	4.45892	414	0.0107703	0.103938
										0.77	0.830176	412.717	2.28261	410.435	4.56522	415	0.0110005	0.106297
										0.76	0.82622	413.663	2.33696	411.326	4.67392	416	0.0112354	0.109912
										0.76	0.82622	414.607	2.39253	412.215	4.78506	417	0.011475	0.109912
										0.74	0.81803	415.551	2.44934	413.101	4.89868	418	0.0117193	0.11362
										0.73	0.813791	416.493	2.50741	413.985	5.01482	419	0.0119686	0.11742
										0.73	0.813791	417.433	2.56677	414.866	5.13353	420	0.0122227	0.11742
										0.71	0.805016	418.373	2.62742	415.745	5.25485	421	0.0124818	0.121312
										0.66	0.781224	419.311	2.6894	416.621	5.3788	422	0.012746	0.129366
										0.66	0.781224	420.247	2.75272	417.495	5.50545	423	0.0130152	0.129366
										0.66	0.781224	421.183	2.81741	418.365	5.63482	424	0.0132897	0.129366
										0.66	0.781224	422.117	2.88347	419.233	5.76695	425	0.0135693	0.129366
										0.66	0.781224	423.049	2.95094	420.098	5.90188	426	0.0138542	0.129366
										0.64	0.770913	423.98	3.01983	420.96	6.03965	427	0.0141444	0.137771
										0.62	0.760117	424.91	3.09015	421.82	6.1803	428	0.01444	0.140648
										0.61	0.754529	425.838	3.16193	422.676	6.32386	429	0.0147409	0.145033
										0.61	0.754529	426.765	3.23519	423.53	6.47038	430	0.0150474	0.145033
										0.6	0.748811	427.69	3.30994	424.38	6.61988	431	0.0153593	0.151003
										0.6	0.748811	428.614	3.3862	425.228	6.77239	432	0.0156768	0.151003
										0.59	0.74296	429.536	3.46398	426.072	6.92797	433	0.0159999	0.157108
										0.59	0.74296	430.457	3.54331	426.913	7.08662	434	0.0163286	0.157108
										0.58	0.736973	431.376	3.6242	427.752	7.24839	435	0.016663	0.161772
										0.57	0.730847	432.293	3.70666	428.587	7.41332	436	0.017003	0.166504
										0.57	0.730847	433.209	3.79071	429.419	7.58141	437	0.0173488	0.166504
										0.56	0.724577	434.124	3.87636	430.247	7.75272	438	0.0177003	0.171302
										0.55	0.718162	435.036	3.96363	431.073	7.92725	439	0.0180575	0.17616
										0.55	0.718162	435.947	4.05252	431.895	8.10504	440	0.0184206	0.17616
										0.53	0.704879	436.857	4.14306	432.714	8.28612	441	0.0187894	0.182726
										0.53	0.704879	437.765	4.23525	433.529	8.4705	442	0.019164	0.182726
										0.52	0.698005	438.671	4.32911	434.342	8.65822	443	0.0195445	0.191061
										0.52	0.698005	439.575	4.42464	435.151	8.84928	444	0.0199308	0.191061
										0.52	0.698005	440.478	4.52185	435.956	9.04371	445	0.0203229	0.191061
										0.49	0.676406	441.379	4.62076	436.758	9.24153	446	0.0207209	0.199517
										0.49	0.676406	442.279	4.72137	437.557	9.44275	447	0.0211247	0.199517
										0.48	0.668869	443.176	4.8237	438.353	9.64739	448	0.0215344	0.208073
										0.48	0.668869	444.072	4.92773	439.145	9.85546	449	0.0219498	0.208073
										0.48	0.668869	444.967	5.03349	439.933	10.067	450	0.0223711	0.208073
										0.47	0.661156	445.859	5.14098	440.718	10.282	451	0.0227981	0.214975
										0.46	0.653263	446.75	5.2502	441.5	10.5004	452	0.023231	0.220176
										0.46	0.653263	447.639	5.36116	442.278	10.7223	453	0.0236696	0.220176
										0.45	0.645187	448.526	5.47385	443.052	10.9477	454	0.0241139	0.230623
										0.45	0.645187	449.412	5.58829	443.823	11.1766	455	0.0245639	0.230623
										0.45	0.645187	450.296	5.70448	444.591	11.409	456	0.0250196	0.230623
										0.45	0.645187	451.178	5.82241	445.355	11.6448	457	0.025481	0.230623
										0.43	0.628465	452.058	5.94208	446.116	11.8842	458	0.0259479	0.242841
										0.43	0.628465	452.936	6.0635	446.873	12.127	459	0.0264205	0.242841
										0.43	0.628465	453.813	6.18667	447.627	12.3733	460	0.0268985	0.242841
										0.41	0.610955	454.688	6.31157	448.377	12.6231	461	0.0273821	0.249815
										0.4	0.601893	455.562	6.43822	449.124	12.8764	462	0.0278711	0.256771
										0.4	0.601893	456.433	6.56661	449.867	13.1332	463	0.0283655	0.256771
										0.4	0.601893	457.303	6.69673	450.607	13.3935	464	0.0288652	0.256771
										0.39	0.59262	458.171	6.82858	451.343	13.6572	465	0.0293702	0.265425
										0.39	0.59262	459.038	6.96215	452.076	13.9243	466	0.0298805	0.265425
										0.38	0.583131	459.903	7.09744	452.805	14.1949	467	0.0303959	0.275725
										0.38	0.583131	460.766	7.23445	453.531	14.4689	468	0.0309165	0.275725
										0.38	0.583131	461.627	7.37317	454.254	14.7463	469	0.0314421	0.275725
										0.38	0.583131	462.486	7.51358	454.973	15.0272	470	0.0319727	0.275725
										0.37	0.57342	463.344	7.65569	455.689	15.3114	471	0.0325082	0.290943
										0.37	0.57342	464.201	7.79948	456.401	15.599	472	0.0330487	0.290943
										0.37	0.57342	465.055	7.94496	457.11	15.8899	473	0.0335939	0.290943
										0.37	0.57342	465.908	8.0921	457.816	16.1842	474	0.0341439	0.290943
										0.37	0.57342	466.759	8.24089	458.518	16.4818	475	0.0346985	0.290943
										0.36	0.563484	467.609	8.39134	459.217	16.7827	476	0.0352577	0.302542
										0.36	0.563484	468.457	8.54343	459.913	17.0869	477	0.0358215	0.302542
										0.35	0.553316	469.303	8.69715	460.606	17.3943	478	0.0363898	0.310681
										0.35	0.553316	470.148	8.85249	461.295	17.705	479	0.0369624	0.310681
										0.35	0.553316	470.991	9.00944	461.981	18.0189	480	0.0375393	0.310681
										0.34	0.542912	471.832	9.16799	462.664	18.336	481	0.0381205	0.323427
										0.34	0.542912	472.672	9.32813	463.344	18.6563	482	0.0387059	0.323427
										0.34	0.542912	473.51	9.48984	464.02	18.9797	483	0.0392954	0.323427
										0.34	0.542912	474.347	9.65312	464.694	19.3062	484	0.0398889	0.323427
										0.34	0.542912	475.182	9.81795	465.364	19.6359	485	0.0404864	0.323427
										0.33	0.532265	476.016	9.98433	466.031	19.9687	486	0.0410878	0.337336
										0.33	0.532265	476.848	10.1522	466.696	20.3045	487	0.0416929	0.337336
										0.33	0.532265	477.678	10.3217	467.357	20.6433	488	0.0423019	0.337336
										0.33	0.532265	478.507	10.4926	468.015	20.9852	489	0.0429145	0.337336
										0.32	0.52137	479.335	10.665	468.67	21.33	490	0.0435307	0.347828
										0.32	0.52137	480.161	10.8389	469.322	21.6779	491	0.0441504	0.347828
										0.32	0.52137	480.986	11.0143	469.971	22.0286	492	0.0447737	0.347828
										0.31	0.510221	481.809	11.1912	470.618	22.3823	493	0.0454003	0.355147
										0.31	0.510221	482.631	11.3695	471.261	22.7389	494	0.0460302	0.355147
										0.3	0.498813	483.451	11.5492	471.902	23.0984	495	0.0466634	0.363738
										0.3	0.498813	484.27	11.7304	472.539	23.4607	496	0.0472998	0.363738
										0.3	0.498813	485.087	11.9129	473.174	23.8259	497	0.0479394	0.363738
										0.3	0.498813	485.903	12.0969	473.806	24.1938	498	0.048582	0.363738
										0.29	0.487139	486.718	12.2823	474.435	24.5646	499	0.0492276	0.374875
										0.29	0.487139	487.531	12.469	475.062	24.9381	500	0.0498761	0.374875
										0.29	0.487139	488.343	12.6572	475.686	25.3143	501	0.0505275	0.374875
										0.29	0.487139	489.153	12.8466	476.307	25.6933	502	0.0511818	0.374875
										0.28	0.475193	489.963	13.0375	476.925	26.0749	503	0.0518388	0.381658
										0.27	0.462968	490.77	13.2296	477.541	26.4593	504	0.0524985	0.389624
										0.27	0.462968	491.577	13.4231	478.154	26.8462	505	0.0531609	0.389624
										0.27	0.462968	492.382	13.6179	478.764	27.2359	506	0.0538258	0.389624
										0.27	0.462968	493.186	13.8141	479.372	27.6281	507	0.0544933	0.389624
										0.27	0.462968	493.989	14.0115	479.977	28.0229	508	0.0551633	0.389624
										0.26	0.450459	494.79	14.2102	480.58	28.4203	509	0.0558356	0.402507
										0.26	0.450459	495.59	14.4102	481.18	28.8203	510	0.0565104	0.402507
										0.26	0.450459	496.389	14.6114	481.777	29.2228	511	0.0571875	0.402507
										0.26	0.450459	497.186	14.8139	482.372	29.6278	512	0.0578669	0.402507
										0.26	0.450459	497.982	15.0177	482.965	30.0354	513	0.0585485	0.402507
										0.25	0.437659	498.777	15.2227	483.555	30.4454	514	0.0592323	0.41616
										0.25	0.437659	499.571	15.4289	484.142	30.8579	515	0.0599182	0.41616
										0.25	0.437659	500.364	15.6364	484.727	31.2728	516	0.0606062	0.41616
										0.25	0.437659	501.155	15.8451	485.31	31.6902	517	0.0612963	0.41616
										0.25	0.437659	501.945	16.055	485.89	32.11	518	0.0619884	0.41616
										0.25	0.437659	502.734	16.2661	486.468	32.5322	519	0.0626824	0.41616
										0.24	0.42456	503.522	16.4784	487.043	32.9568	520	0.0633784	0.429334
										0.24	0.42456	504.308	16.6919	487.616	33.3838	521	0.0640763	0.429334
										0.24	0.42456	505.093	16.9065	488.187	33.8131	522	0.064776	0.429334
										0.24	0.42456	505.878	17.1224	488.755	34.2448	523	0.0654776	0.429334
										0.24	0.42456	506.661	17.3394	489.321	34.6788	524	0.0661809	0.429334
										0.23	0.411156	507.442	17.5576	489.885	35.1151	525	0.066886	0.4375
										0.23	0.411156	508.223	17.7769	490.446	35.5538	526	0.0675928	0.4375
										0.22	0.39744	509.003	17.9974	491.005	35.9947	527	0.0683012	0.444379
										0.22	0.39744	509.781	18.219	491.562	36.438	528	0.0690113	0.444379
										0.22	0.39744	510.558	18.4417	492.117	36.8835	529	0.0697231	0.444379
										0.22	0.39744	511.334	18.6656	492.669	37.3313	530	0.0704364	0.444379
										0.21	0.383405	512.109	18.8907	493.219	37.7813	531	0.0711512	0.452279
										0.21	0.383405	512.883	19.1168	493.766	38.2336	532	0.0718676	0.452279
										0.21	0.383405	513.656	19.3441	494.312	38.6881	533	0.0725856	0.452279
										0.2	0.369043	514.428	19.5724	494.855	39.1448	534	0.0733049	0.464454
										0.2	0.369043	515.198	19.8019	495.396	39.6038	535	0.0740258	0.464454
										0.2	0.369043	515.968	20.0325	495.935	40.065	536	0.074748	0.464454
										0.2	0.369043	516.736	20.2642	496.472	40.5283	537	0.0754717	0.464454
										0.2	0.369043	517.503	20.4969	497.006	40.9939	538	0.0761968	0.464454
										0.2	0.369043	518.269	20.7308	497.538	41.4616	539	0.0769232	0.464454
										0.2	0.369043	519.034	20.9657	498.069	41.9315	540	0.0776509	0.464454
										0.2	0.369043	519.798	21.2018	498.596	42.4036	541	0.07838	0.464454
										0.19	0.354346	520.561	21.4389	499.122	42.8778	542	0.0791103	0.478526
										0.19	0.354346	521.323	21.6771	499.646	43.3542	543	0.0798419	0.478526
										0.19	0.354346	522.084	21.9163	500.167	43.8327	544	0.0805748	0.478526
										0.19	0.354346	522.843	22.1567	500.687	44.3134	545	0.0813089	0.478526
										0.19	0.354346	523.602	22.3981	501.204	44.7962	546	0.0820442	0.478526
										0.18	0.339307	524.359	22.6405	501.719	45.2811	547	0.0827808	0.487045
										0.18	0.339307	525.116	22.8841	502.232	45.7681	548	0.0835185	0.487045
										0.18	0.339307	525.871	23.1286	502.743	46.2573	549	0.0842573	0.487045
										0.17	0.323917	526.626	23.3743	503.251	46.7485	550	0.0849974	0.495475
										0.17	0.323917	527.379	23.621	503.758	47.2419	551	0.0857385	0.495475
										0.17	0.323917	528.131	23.8687	504.263	47.7374	552	0.0864808	0.495475
										0.17	0.323917	528.883	24.1175	504.765	48.235	553	0.0872242	0.495475
										0.17	0.323917	529.633	24.3673	505.265	48.7346	554	0.0879686	0.495475
										0.16	0.308169	530.382	24.6182	505.764	49.2364	555	0.0887142	0.505906
										0.16	0.308169	531.13	24.8701	506.26	49.7402	556	0.0894608	0.505906
										0.16	0.308169	531.877	25.1231	506.754	50.2461	557	0.0902085	0.505906
										0.16	0.308169	532.623	25.377	507.246	50.7541	558	0.0909572	0.505906
										0.16	0.308169	533.368	25.6321	507.736	51.2641	559	0.0917069	0.505906
										0.15	0.292054	534.112	25.8881	508.224	51.7763	560	0.0924576	0.518295
										0.15	0.292054	534.855	26.1452	508.71	52.2904	561	0.0932093	0.518295
										0.15	0.292054	535.597	26.4033	509.193	52.8067	562	0.0939621	0.518295
										0.15	0.292054	536.338	26.6625	509.675	53.325	563	0.0947158	0.518295
										0.15	0.292054	537.077	26.9227	510.155	53.8453	564	0.0954704	0.518295
										0.15	0.292054	537.816	27.1839	510.632	54.3677	565	0.096226	0.518295
										0.15	0.292054	538.554	27.4461	511.108	54.8922	566	0.0969826	0.518295
										0.14	0.275564	539.291	27.7093	511.581	55.4186	567	0.0977401	0.531587
										0.14	0.275564	540.026	27.9736	512.053	55.9472	568	0.0984986	0.531587
										0.14	0.275564	540.761	28.2389	512.522	56.4777	569	0.0992579	0.531587
										0.14	0.275564	541.495	28.5052	512.99	57.0104	570	0.100018	0.531587
										0.14	0.275564	542.228	28.7725	513.455	57.545	571	0.100779	0.531587
										0.14	0.275564	542.959	29.0408	513.918	58.0817	572	0.101541	0.531587
										0.13	0.25869	543.69	29.3102	514.38	58.6204	573	0.102304	0.543763
										0.13	0.25869	544.419	29.5805	514.839	59.1611	574	0.103068	0.543763
										0.13	0.25869	545.148	29.8519	515.296	59.7038	575	0.103833	0.543763
										0.13	0.25869	545.876	30.1243	515.751	60.2486	576	0.104598	0.543763
										0.13	0.25869	546.602	30.3977	516.205	60.7954	577	0.105365	0.543763
										0.13	0.25869	547.328	30.6721	516.656	61.3442	578	0.106132	0.543763
										0.12	0.241422	548.052	30.9475	517.105	61.895	579	0.1069	0.556868
										0.12	0.241422	548.776	31.2239	517.552	62.4479	580	0.107669	0.556868
										0.12	0.241422	549.499	31.5014	517.997	63.0027	581	0.108438	0.556868
										0.12	0.241422	550.22	31.7798	518.44	63.5596	582	0.109209	0.556868
										0.12	0.241422	550.941	32.0592	518.882	64.1185	583	0.10998	0.556868
										0.12	0.241422	551.66	32.3397	519.321	64.6794	584	0.110752	0.556868
										0.12	0.241422	552.379	32.6211	519.758	65.2423	585	0.111525	0.556868
										0.11	0.223753	553.096	32.9036	520.193	65.8072	586	0.112299	0.576891
										0.11	0.223753	553.813	33.187	520.626	66.3741	587	0.113073	0.576891
										0.11	0.223753	554.529	33.4715	521.057	66.943	588	0.113849	0.576891
										0.11	0.223753	555.243	33.7569	521.486	67.5139	589	0.114625	0.576891
										0.11	0.223753	555.957	34.0434	521.913	68.0868	590	0.115401	0.576891
										0.11	0.223753	556.669	34.3308	522.338	68.6617	591	0.116179	0.576891
										0.11	0.223753	557.381	34.6193	522.761	69.2385	592	0.116957	0.576891
										0.11	0.223753	558.091	34.9087	523.183	69.8174	593	0.117736	0.576891
										0.11	0.223753	558.801	35.1992	523.602	70.3983	594	0.118516	0.576891
										0.11	0.223753	559.509	35.4906	524.019	70.9812	595	0.119296	0.576891
										0.11	0.223753	560.217	35.783	524.434	71.566	596	0.120077	0.576891
										0.11	0.223753	560.924	36.0764	524.847	72.1529	597	0.120859	0.576891
										0.11	0.223753	561.629	36.3709	525.258	72.7417	598	0.121642	0.576891
										0.1	0.205672	562.334	36.6663	525.667	73.3325	599	0.122425	0.597761
										0.1	0.205672	563.037	36.9627	526.075	73.9253	600	0.123209	0.597761
										0.1	0.205672	563.74	37.2601	526.48	74.5201	601	0.123994	0.597761
										0.1	0.205672	564.442	37.5585	526.883	75.1169	602	0.124779	0.597761
										0.1	0.205672	565.142	37.8578	527.284	75.7157	603	0.125565	0.597761
										0.1	0.205672	565.842	38.1582	527.684	76.3164	604	0.126352	0.597761
										0.1	0.205672	566.54	38.4595	528.081	76.9191	605	0.127139	0.597761
										0.1	0.205672	567.238	38.7619	528.476	77.5238	606	0.127927	0.597761
										0.09	0.187169	567.935	39.0652	528.87	78.1304	607	0.128716	0.622423
										0.09	0.187169	568.63	39.3695	529.261	78.7391	608	0.129505	0.622423
										0.09	0.187169	569.325	39.6748	529.65	79.3497	609	0.130295	0.622423
										0.09	0.187169	570.019	39.9811	530.038	79.9623	610	0.131086	0.622423
										0.09	0.187169	570.712	40.2884	530.423	80.5768	611	0.131877	0.622423
										0.09	0.187169	571.403	40.5967	530.807	81.1933	612	0.132669	0.622423
										0.09	0.187169	572.094	40.9059	531.188	81.8118	613	0.133461	0.622423
										0.09	0.187169	572.784	41.2161	531.568	82.4323	614	0.134255	0.622423
										0.09	0.187169	573.473	41.5274	531.945	83.0547	615	0.135048	0.622423
										0.09	0.187169	574.16	41.8395	532.321	83.6791	616	0.135843	0.622423
										0.09	0.187169	574.847	42.1527	532.695	84.3055	617	0.136638	0.622423
										0.09	0.187169	575.533	42.4669	533.066	84.9338	618	0.137433	0.622423
										0.09	0.187169	576.218	42.782	533.436	85.564	619	0.138229	0.622423
										0.09	0.187169	576.902	43.0981	533.804	86.1963	620	0.139026	0.622423
										0.09	0.187169	577.585	43.4152	534.17	86.8305	621	0.139824	0.622423
										0.09	0.187169	578.267	43.7333	534.533	87.4666	622	0.140622	0.622423
										0.09	0.187169	578.948	44.0524	534.895	88.1047	623	0.14142	0.622423
										0.08	0.168236	579.628	44.3724	535.255	88.7448	624	0.142219	0.658567
										0.08	0.168236	580.307	44.6934	535.613	89.3868	625	0.143019	0.658567
										0.08	0.168236	580.985	45.0154	535.969	90.0308	626	0.143819	0.658567
										0.08	0.168236	581.662	45.3383	536.323	90.6767	627	0.14462	0.658567
										0.08	0.168236	582.338	45.6623	536.675	91.3245	628	0.145421	0.658567
										0.08	0.168236	583.013	45.9872	537.026	91.9744	629	0.146223	0.658567
										0.08	0.168236	583.687	46.3131	537.374	92.6261	630	0.147026	0.658567
										0.08	0.168236	584.36	46.6399	537.72	93.2798	631	0.147829	0.658567
										0.08	0.168236	585.032	46.9677	538.065	93.9355	632	0.148632	0.658567
										0.08	0.168236	585.703	47.2965	538.407	94.5931	633	0.149436	0.658567
										0.08	0.168236	586.374	47.6263	538.747	95.2526	634	0.150241	0.658567
										0.08	0.168236	587.043	47.957	539.086	95.9141	635	0.151046	0.658567
										0.08	0.168236	587.711	48.2888	539.422	96.5775	636	0.151851	0.658567
										0.08	0.168236	588.379	48.6214	539.757	97.2429	637	0.152658	0.658567
										0.08	0.168236	589.045	48.9551	540.09	97.9102	638	0.153464	0.658567
										0.08	0.168236	589.71	49.2897	540.421	98.5794	639	0.154271	0.658567
										0.08	0.168236	590.375	49.6253	540.749	99.2505	640	0.155079	0.658567
										0.08	0.168236	591.038	49.9618	541.076	99.9236	641	0.155887	0.658567
										0.08	0.168236	591.701	50.2993	541.401	100.599	642	0.156696	0.658567
										0.08	0.168236	592.362	50.6378	541.724	101.276	643	0.157505	0.658567
										0.07	0.148862	593.023	50.9772	542.046	101.954	644	0.158314	0.699044
										0.07	0.148862	593.682	51.3177	542.365	102.635	645	0.159125	0.699044
										0.07	0.148862	594.341	51.659	542.682	103.318	646	0.159935	0.699044
										0.07	0.148862	594.999	52.0013	542.997	104.003	647	0.160746	0.699044
										0.07	0.148862	595.655	52.3446	543.311	104.689	648	0.161558	0.699044
										0.07	0.148862	596.311	52.6889	543.622	105.378	649	0.162369	0.699044
										0.07	0.148862	596.966	53.0341	543.932	106.068	650	0.163182	0.699044
										0.07	0.148862	597.62	53.3803	544.239	106.761	651	0.163995	0.699044
										0.07	0.148862	598.273	53.7274	544.545	107.455	652	0.164808	0.699044
										0.07	0.148862	598.925	54.0755	544.849	108.151	653	0.165622	0.699044
										0.07	0.148862	599.575	54.4245	545.151	108.849	654	0.166436	0.699044
										0.07	0.148862	600.225	54.7745	545.451	109.549	655	0.16725	0.699044
										0.07	0.148862	600.875	55.1255	545.749	110.251	656	0.168066	0.699044
										0.07	0.148862	601.523	55.4774	546.045	110.955	657	0.168881	0.699044
										0.07	0.148862	602.17	55.8303	546.339	111.661	658	0.169697	0.699044
										0.07	0.148862	602.816	56.1841	546.632	112.368	659	0.170513	0.699044
										0.07	0.148862	603.461	56.5389	546.922	113.078	660	0.17133	0.699044
										0.07	0.148862	604.105	56.8946	547.211	113.789	661	0.172147	0.699044
										0.07	0.148862	604.749	57.2512	547.498	114.502	662	0.172965	0.699044
										0.07	0.148862	605.391	57.6089	547.782	115.218	663	0.173782	0.699044
										0.07	0.148862	606.033	57.9674	548.065	115.935	664	0.174601	0.699044
										0.07	0.148862	606.673	58.327	548.346	116.654	665	0.175419	0.699044
										0.06	0.129036	607.313	58.6874	548.625	117.375	666	0.176239	0.747324
										0.06	0.129036	607.951	59.0489	548.902	118.098	667	0.177058	0.747324
										0.06	0.129036	608.589	59.4112	549.178	118.822	668	0.177878	0.747324
										0.06	0.129036	609.225	59.7745	549.451	119.549	669	0.178698	0.747324
										0.06	0.129036	609.861	60.1388	549.722	120.278	670	0.179519	0.747324
										0.06	0.129036	610.496	60.504	549.992	121.008	671	0.18034	0.747324
										0.06	0.129036	611.13	60.8701	550.26	121.74	672	0.181161	0.747324
										0.06	0.129036	611.763	61.2372	550.526	122.474	673	0.181983	0.747324
										0.06	0.129036	612.395	61.6052	550.79	123.21	674	0.182805	0.747324
										0.06	0.129036	613.026	61.9742	551.052	123.948	675	0.183627	0.747324
										0.06	0.129036	613.656	62.3441	551.312	124.688	676	0.18445	0.747324
										0.06	0.129036	614.285	62.715	551.57	125.43	677	0.185273	0.747324
										0.06	0.129036	614.913	63.0868	551.826	126.174	678	0.186097	0.747324
										0.06	0.129036	615.541	63.4595	552.081	126.919	679	0.18692	0.747324
										0.06	0.129036	616.167	63.8331	552.334	127.666	680	0.187745	0.747324
										0.06	0.129036	616.792	64.2077	552.585	128.415	681	0.188569	0.747324
										0.06	0.129036	617.417	64.5833	552.833	129.167	682	0.189394	0.747324
										0.06	0.129036	618.04	64.9597	553.081	129.919	683	0.190219	0.747324
										0.06	0.129036	618.663	65.3371	553.326	130.674	684	0.191044	0.747324
										0.06	0.129036	619.285	65.7155	553.569	131.431	685	0.19187	0.747324
										0.06	0.129036	619.905	66.0947	553.811	132.189	686	0.192696	0.747324
										0.06	0.129036	620.525	66.4749	554.05	132.95	687	0.193522	0.747324
										0.06	0.129036	621.144	66.8561	554.288	133.712	688	0.194349	0.747324
										0.06	0.129036	621.762	67.2381	554.524	134.476	689	0.195176	0.747324
										0.06	0.129036	622.379	67.6211	554.758	135.242	690	0.196003	0.747324
										0.06	0.129036	622.995	68.005	554.99	136.01	691	0.196831	0.747324
										0.06	0.129036	623.61	68.3899	555.22	136.78	692	0.197659	0.747324
										0.06	0.129036	624.224	68.7756	555.449	137.551	693	0.198487	0.747324
										0.06	0.129036	624.838	69.1623	555.675	138.325	694	0.199315	0.747324
										0.05	0.108749	625.45	69.55	555.9	139.1	695	0.200144	0.804584
										0.05	0.108749	626.062	69.9385	556.123	139.877	696	0.200973	0.804584
										0.05	0.108749	626.672	70.328	556.344	140.656	697	0.201802	0.804584
										0.05	0.108749	627.282	70.7183	556.563	141.437	698	0.202631	0.804584
										0.05	0.108749	627.89	71.1097	556.781	142.219	699	0.203461	0.804584
										0.05	0.108749	628.498	71.5019	556.996	143.004	700	0.204291	0.804584
										0.05	0.108749	629.105	71.895	557.21	143.79	701	0.205121	0.804584
										0.05	0.108749	629.711	72.2891	557.422	144.578	702	0.205952	0.804584
										0.05	0.108749	630.316	72.6841	557.632	145.368	703	0.206783	0.804584
										0.05	0.108749	630.92	73.08	557.84	146.16	704	0.207614	0.804584
										0.05	0.108749	631.523	73.4768	558.046	146.954	705	0.208445	0.804584
										0.05	0.108749	632.125	73.8745	558.251	147.749	706	0.209276	0.804584
										0.05	0.108749	632.727	74.2732	558.454	148.546	707	0.210108	0.804584
										0.05	0.108749	633.327	74.6727	558.655	149.345	708	0.21094	0.804584
										0.05	0.108749	633.927	75.0732	558.854	150.146	709	0.211772	0.804584
										0.05	0.108749	634.525	75.4746	559.051	150.949	710	0.212604	0.804584
										0.05	0.108749	635.123	75.8769	559.246	151.754	711	0.213437	0.804584
										0.05	0.108749	635.72	76.2801	559.44	152.56	712	0.21427	0.804584
										0.05	0.108749	636.316	76.6842	559.632	153.368	713	0.215103	0.804584
										0.05	0.108749	636.911	77.0892	559.822	154.178	714	0.215936	0.804584
										0.05	0.108749	637.505	77.4951	560.01	154.99	715	0.21677	0.804584
										0.05	0.108749	638.098	77.902	560.196	155.804	716	0.217603	0.804584
										0.05	0.108749	638.69	78.3097	560.381	156.619	717	0.218437	0.804584
										0.05	0.108749	639.282	78.7183	560.563	157.437	718	0.219271	0.804584
										0.05	0.108749	639.872	79.1279	560.744	158.256	719	0.220105	0.804584
										0.05	0.108749	640.462	79.5383	560.923	159.077	720	0.22094	0.804584
										0.05	0.108749	641.05	79.9497	561.101	159.899	721	0.221774	0.804584
										0.05	0.108749	641.638	80.3619	561.276	160.724	722	0.222609	0.804584
										0.05	0.108749	642.225	80.7751	561.45	161.55	723	0.223444	0.804584
										0.05	0.108749	642.811	81.1891	561.622	162.378	724	0.224279	0.804584
										0.05	0.108749	643.396	81.6041	561.792	163.208	725	0.225115	0.804584
										0.05	0.108749	643.98	82.0199	561.96	164.04	726	0.22595	0.804584
										0.05	0.108749	644.563	82.4366	562.127	164.873	727	0.226786	0.804584

## Sheet: Distinct Peptide Level Data
Distinct Peptide Level Data		Confidence Threshold	Forward	Reverse	Correct	Incorrect	Total	Global FDR	q-value		Fit Confidence Threshold	Fit Forward	Fit Reverse	Fit Correct	Fit Incorrect	Fit Total	Fit Global FDR	Fit Local FDR
		1	511	1	510	2	512	0.00390625	0.00154799		1	1	7.94332e-12	1	1.58866e-11	1	1.58866e-11	1.9057e-06
		0.9999	606	1	605	2	607	0.00329489	0.00154799		1	2	1.58709e-11	2	3.17419e-11	2	1.58709e-11	1.9057e-06
		0.9998	663	1	662	2	664	0.00301205	0.00154799		1	3	2.38143e-11	3	4.76285e-11	3	1.58762e-11	1.9057e-06
		0.9997	676	1	675	2	677	0.00295421	0.00154799		1	4	3.17419e-11	4	6.34837e-11	4	1.58709e-11	1.9057e-06
		0.9996	743	1	742	2	744	0.00268817	0.00154799		1	5	3.96852e-11	5	7.93704e-11	5	1.58741e-11	1.9057e-06
		0.9995	749	1	748	2	750	0.00266667	0.00154799		1	6	4.76117e-11	6	9.52233e-11	6	1.58706e-11	1.9057e-06
		0.9994	788	1	787	2	789	0.00253485	0.00154799		1	7	5.55561e-11	7	1.11112e-10	7	1.58732e-11	1.9057e-06
		0.9993	791	1	790	2	792	0.00252525	0.00154799		1	8	6.34826e-11	8	1.26965e-10	8	1.58707e-11	1.9057e-06
		0.9992	798	1	797	2	799	0.00250313	0.00154799		1	9	7.1427e-11	9	1.42854e-10	9	1.58727e-11	1.9057e-06
		0.9991	806	1	805	2	807	0.00247831	0.00154799		1	10	7.93535e-11	10	1.58707e-10	10	1.58707e-11	1.9057e-06
		0.999	908	1	907	2	909	0.00220022	0.00154799		1	11	8.72811e-11	11	1.74562e-10	11	1.58693e-11	1.9057e-06
		0.9989	910	1	909	2	911	0.00219539	0.00154799		1	12	9.52245e-11	12	1.90449e-10	12	1.58707e-11	1.9057e-06
		0.9988	914	1	913	2	915	0.00218579	0.00154799		1	13	1.03151e-10	13	2.06302e-10	13	1.58694e-11	1.9057e-06
		0.9987	918	1	917	2	919	0.00217628	0.00154799		1	14	1.11095e-10	14	2.22191e-10	14	1.58708e-11	1.9057e-06
		0.9986	936	1	935	2	937	0.00213447	0.00154799		1	15	1.19022e-10	15	2.38044e-10	15	1.58696e-11	1.9057e-06
		0.9985	941	1	940	2	942	0.00212314	0.00154799		1	16	1.26966e-10	16	2.53933e-10	16	1.58708e-11	1.9057e-06
		0.9984	947	1	946	2	948	0.0021097	0.00154799		1	17	1.34893e-10	17	2.69786e-10	17	1.58697e-11	1.9057e-06
		0.9983	952	1	951	2	953	0.00209864	0.00154799		1	18	1.42836e-10	18	2.85672e-10	18	1.58707e-11	1.9057e-06
		0.9982	955	1	954	2	956	0.00209205	0.00154799		1	19	1.50764e-10	19	3.01527e-10	19	1.58699e-11	1.9057e-06
		0.9981	956	1	955	2	957	0.00208986	0.00154799		1	20	1.58707e-10	20	3.17414e-10	20	1.58707e-11	1.9057e-06
		0.998	962	1	961	2	963	0.00207684	0.00154799		1	21	1.66635e-10	21	3.33269e-10	21	1.587e-11	1.9057e-06
		0.9979	964	1	963	2	965	0.00207254	0.00154799		1	22	1.74561e-10	22	3.49122e-10	22	1.58692e-11	1.9057e-06
		0.9978	969	1	968	2	970	0.00206186	0.00154799		1	23	1.82504e-10	23	3.65009e-10	23	1.587e-11	1.9057e-06
		0.9977	973	1	972	2	974	0.00205339	0.00154799		1	24	1.90432e-10	24	3.80864e-10	24	1.58693e-11	1.9057e-06
		0.9976	977	1	976	2	978	0.00204499	0.00154799		1	25	1.98375e-10	25	3.96751e-10	25	1.587e-11	1.9057e-06
		0.9975	978	1	977	2	979	0.0020429	0.00154799		1	26	2.06303e-10	26	4.12606e-10	26	1.58695e-11	1.9057e-06
		0.9974	981	1	980	2	982	0.00203666	0.00154799		1	27	2.14246e-10	27	4.28493e-10	27	1.58701e-11	1.9057e-06
		0.9973	988	1	987	2	989	0.00202224	0.00154799		1	28	2.22174e-10	28	4.44348e-10	28	1.58696e-11	1.9057e-06
		0.9972	991	1	990	2	992	0.00201613	0.00154799		1	29	2.30117e-10	29	4.60235e-10	29	1.58702e-11	1.9057e-06
		0.9971	994	1	993	2	995	0.00201005	0.00154799		1	30	2.38044e-10	30	4.76088e-10	30	1.58696e-11	1.9057e-06
		0.997	995	1	994	2	996	0.00200803	0.00154799		1	31	2.45988e-10	31	4.91976e-10	31	1.58702e-11	1.9057e-06
		0.9969	1002	1	1001	2	1003	0.00199402	0.00154799		1	32	2.53915e-10	32	5.07829e-10	32	1.58697e-11	1.9057e-06
		0.9968	1007	1	1006	2	1008	0.00198413	0.00154799		1	33	2.61842e-10	33	5.23685e-10	33	1.58692e-11	1.9057e-06
		0.9967	1013	1	1012	2	1014	0.00197239	0.00154799		1	34	2.69786e-10	34	5.39571e-10	34	1.58697e-11	1.9057e-06
		0.9966	1019	1	1018	2	1020	0.00196078	0.00154799		1	35	2.77713e-10	35	5.55426e-10	35	1.58693e-11	1.9057e-06
		0.9965	1020	1	1019	2	1021	0.00195886	0.00154799		1	36	2.85657e-10	36	5.71313e-10	36	1.58698e-11	1.9057e-06
		0.9964	1026	1	1025	2	1027	0.00194742	0.00154799		1	37	2.93583e-10	37	5.87166e-10	37	1.58694e-11	1.9057e-06
		0.9963	1028	1	1027	2	1029	0.00194363	0.00154799		1	38	3.01527e-10	38	6.03055e-10	38	1.58699e-11	1.9057e-06
		0.9962	1029	1	1028	2	1030	0.00194175	0.00154799		1	39	3.09454e-10	39	6.18908e-10	39	1.58694e-11	1.9057e-06
		0.9961	1032	1	1031	2	1033	0.00193611	0.00154799		1	40	3.17397e-10	40	6.34795e-10	40	1.58699e-11	1.9057e-06
		0.996	1035	1	1034	2	1036	0.0019305	0.00154799		1	41	3.25325e-10	41	6.5065e-10	41	1.58695e-11	1.9057e-06
		0.9959	1037	1	1036	2	1038	0.00192678	0.00154799		1	42	3.33268e-10	42	6.66536e-10	42	1.58699e-11	1.9057e-06
		0.9958	1039	1	1038	2	1040	0.00192308	0.00154799		1	43	3.41196e-10	43	6.82392e-10	43	1.58696e-11	1.9057e-06
		0.9957	1042	1	1041	2	1043	0.00191755	0.00154799		1	44	3.49122e-10	44	6.98245e-10	44	1.58692e-11	1.9057e-06
		0.9956	1043	1	1042	2	1044	0.00191571	0.00154799		1	45	3.57067e-10	45	7.14134e-10	45	1.58696e-11	1.9057e-06
		0.9955	1048	1	1047	2	1049	0.00190658	0.00154799		1	46	3.64993e-10	46	7.29987e-10	46	1.58693e-11	1.9057e-06
		0.9954	1050	1	1049	2	1051	0.00190295	0.00154799		1	47	3.72937e-10	47	7.45873e-10	47	1.58696e-11	1.9057e-06
		0.9953	1051	1	1050	2	1052	0.00190114	0.00154799		1	48	3.80864e-10	48	7.61728e-10	48	1.58693e-11	1.9057e-06
		0.9952	1053	1	1052	2	1054	0.00189753	0.00154799		1	49	3.88808e-10	49	7.77615e-10	49	1.58697e-11	1.9057e-06
		0.9951	1058	1	1057	2	1059	0.00188857	0.00154799		1	50	3.96735e-10	50	7.9347e-10	50	1.58694e-11	1.9057e-06
		0.995	1060	1	1059	2	1061	0.00188501	0.00154799		1	51	4.04678e-10	51	8.09357e-10	51	1.58697e-11	1.9057e-06
		0.9949	1063	1	1062	2	1064	0.0018797	0.00154799		1	52	4.12606e-10	52	8.25212e-10	52	1.58695e-11	1.9057e-06
		0.9948	1094	1	1093	2	1095	0.00182648	0.00154799		1	53	4.20549e-10	53	8.41099e-10	53	1.58698e-11	1.9057e-06
		0.9947	1097	1	1096	2	1098	0.00182149	0.00154799		1	54	4.28476e-10	54	8.56952e-10	54	1.58695e-11	1.9057e-06
		0.9945	1118	1	1117	2	1119	0.00178731	0.00154799		1	55	4.36403e-10	55	8.72807e-10	55	1.58692e-11	1.9057e-06
		0.9944	1119	1	1118	2	1120	0.00178571	0.00154799		1	56	4.44347e-10	56	8.88694e-10	56	1.58695e-11	1.9057e-06
		0.9943	1122	1	1121	2	1123	0.00178094	0.00154799		1	57	4.52274e-10	57	9.04549e-10	57	1.58693e-11	1.9057e-06
		0.9942	1127	1	1126	2	1128	0.00177305	0.00154799		1	58	4.60218e-10	58	9.20435e-10	58	1.58696e-11	1.9057e-06
		0.9941	1128	1	1127	2	1129	0.00177148	0.00154799		1	59	4.68145e-10	59	9.36291e-10	59	1.58693e-11	1.9057e-06
		0.994	1129	1	1128	2	1130	0.00176991	0.00154799		1	60	4.76089e-10	60	9.52177e-10	60	1.58696e-11	1.9057e-06
		0.9939	1132	1	1131	2	1133	0.00176523	0.00154799		1	61	4.84015e-10	61	9.6803e-10	61	1.58693e-11	1.9057e-06
		0.9938	1133	1	1132	2	1134	0.00176367	0.00154799		1	62	4.9196e-10	62	9.83919e-10	62	1.58697e-11	1.9057e-06
		0.9937	1134	1	1133	2	1135	0.00176211	0.00154799		1	63	4.99886e-10	63	9.99772e-10	63	1.58694e-11	1.9057e-06
		0.9936	1143	1	1142	2	1144	0.00174825	0.00154799		1	64	5.07829e-10	64	1.01566e-09	64	1.58697e-11	1.9057e-06
		0.9935	1146	1	1145	2	1147	0.00174368	0.00154799		1	65	5.15757e-10	65	1.03151e-09	65	1.58694e-11	1.9057e-06
		0.9934	1148	1	1147	2	1149	0.00174064	0.00154799		1	66	5.23685e-10	66	1.04737e-09	66	1.58692e-11	1.9057e-06
		0.9933	1149	1	1148	2	1150	0.00173913	0.00154799		1	67	5.31628e-10	67	1.06326e-09	67	1.58695e-11	1.9057e-06
		0.9932	1153	1	1152	2	1154	0.0017331	0.00154799		1	68	5.39554e-10	68	1.07911e-09	68	1.58692e-11	1.9057e-06
		0.9931	1154	1	1153	2	1155	0.0017316	0.00154799		1	69	5.47499e-10	69	1.095e-09	69	1.58695e-11	1.9057e-06
		0.993	1168	1	1167	2	1169	0.00171086	0.00154799		1	70	5.55425e-10	70	1.11085e-09	70	1.58693e-11	1.9057e-06
		0.9929	1171	1	1170	2	1172	0.00170648	0.00154799		1	71	5.63369e-10	71	1.12674e-09	71	1.58695e-11	1.9057e-06
		0.9928	1173	1	1172	2	1174	0.00170358	0.00154799		1	72	5.71296e-10	72	1.14259e-09	72	1.58693e-11	1.9057e-06
		0.9927	1178	1	1177	2	1179	0.00169635	0.00154799		1	73	5.7924e-10	73	1.15848e-09	73	1.58696e-11	1.9057e-06
		0.9926	1179	1	1178	2	1180	0.00169492	0.00154799		1	74	5.87167e-10	74	1.17433e-09	74	1.58694e-11	1.9057e-06
		0.9924	1182	1	1181	2	1183	0.00169062	0.00154799		1	75	5.95111e-10	75	1.19022e-09	75	1.58696e-11	1.9057e-06
		0.9923	1183	1	1182	2	1184	0.00168919	0.00154799		1	76	6.03038e-10	76	1.20608e-09	76	1.58694e-11	1.9057e-06
		0.9921	1184	1	1183	2	1185	0.00168776	0.00154799		1	77	6.10965e-10	77	1.22193e-09	77	1.58692e-11	1.9057e-06
		0.992	1185	1	1184	2	1186	0.00168634	0.00154799		1	78	6.18908e-10	78	1.23782e-09	78	1.58694e-11	1.9057e-06
		0.9919	1187	1	1186	2	1188	0.0016835	0.00154799		1	79	6.26836e-10	79	1.25367e-09	79	1.58693e-11	1.9057e-06
		0.9918	1191	1	1190	2	1192	0.00167785	0.00154799		1	80	6.34779e-10	80	1.26956e-09	80	1.58695e-11	1.9057e-06
		0.9917	1193	1	1192	2	1194	0.00167504	0.00154799		1	81	6.42707e-10	81	1.28541e-09	81	1.58693e-11	1.9057e-06
		0.9916	1194	1	1193	2	1195	0.00167364	0.00154799		1	82	6.5065e-10	82	1.3013e-09	82	1.58695e-11	1.9057e-06
		0.9915	1195	1	1194	2	1196	0.00167224	0.00154799		1	83	6.58577e-10	83	1.31715e-09	83	1.58693e-11	1.9057e-06
		0.9914	1199	1	1198	2	1200	0.00166667	0.00154799		1	84	6.66521e-10	84	1.33304e-09	84	1.58695e-11	1.9057e-06
		0.9913	1200	1	1199	2	1201	0.00166528	0.00154799		1	85	6.74447e-10	85	1.34889e-09	85	1.58693e-11	1.9057e-06
		0.9912	1206	1	1205	2	1207	0.001657	0.00154799		1	86	6.82392e-10	86	1.36478e-09	86	1.58696e-11	1.9057e-06
		0.9911	1209	1	1208	2	1210	0.00165289	0.00154799		1	87	6.90318e-10	87	1.38064e-09	87	1.58694e-11	1.9057e-06
		0.991	1211	1	1210	2	1212	0.00165017	0.00154799		1	88	6.98246e-10	88	1.39649e-09	88	1.58692e-11	1.9057e-06
		0.9909	1212	1	1211	2	1213	0.0016488	0.00154799		1	89	7.06189e-10	89	1.41238e-09	89	1.58694e-11	1.9057e-06
		0.9908	1214	1	1213	2	1215	0.00164609	0.00154799		1	90	7.14117e-10	90	1.42823e-09	90	1.58693e-11	1.9057e-06
		0.9907	1218	1	1217	2	1219	0.00164069	0.00154799		1	91	7.2206e-10	91	1.44412e-09	91	1.58695e-11	1.9057e-06
		0.9906	1220	1	1219	2	1221	0.001638	0.00154799		1	92	7.29987e-10	92	1.45997e-09	92	1.58693e-11	1.9057e-06
		0.9905	1223	1	1222	2	1224	0.00163399	0.00154799		1	93	7.37931e-10	93	1.47586e-09	93	1.58695e-11	1.9057e-06
		0.9904	1224	1	1223	2	1225	0.00163265	0.00154799		1	94	7.45857e-10	94	1.49171e-09	94	1.58693e-11	1.9057e-06
		0.9903	1230	1	1229	2	1231	0.0016247	0.00154799		1	95	7.53801e-10	95	1.5076e-09	95	1.58695e-11	1.9057e-06
		0.9901	1232	1	1231	2	1233	0.00162206	0.00154799		1	96	7.61728e-10	96	1.52346e-09	96	1.58693e-11	1.9057e-06
		0.99	1233	1	1232	2	1234	0.00162075	0.00154799		1	97	7.69672e-10	97	1.53934e-09	97	1.58695e-11	1.9057e-06
		0.9898	1235	1	1234	2	1236	0.00161812	0.00154799		1	98	7.77615e-10	98	1.55523e-09	98	1.58697e-11	1.9057e-06
		0.9897	1236	1	1235	2	1237	0.00161681	0.00154799		1	99	7.85543e-10	99	1.57109e-09	99	1.58695e-11	1.9057e-06
		0.9896	1237	1	1236	2	1238	0.00161551	0.00154799		1	100	7.93486e-10	100	1.58697e-09	100	1.58697e-11	1.9057e-06
		0.9895	1241	1	1240	2	1242	0.00161031	0.00154799		1	101	8.01414e-10	101	1.60283e-09	101	1.58696e-11	1.9057e-06
		0.9894	1243	1	1242	2	1244	0.00160772	0.00154799		1	102	8.09357e-10	102	1.61871e-09	102	1.58697e-11	1.9057e-06
		0.9893	1244	1	1243	2	1245	0.00160643	0.00154799		1	103	8.17285e-10	103	1.63457e-09	103	1.58696e-11	1.9057e-06
		0.9891	1247	1	1246	2	1248	0.00160256	0.00154799		1	104	8.25244e-10	104	1.65049e-09	104	1.58701e-11	1.9057e-06
		0.989	1248	1	1247	2	1249	0.00160128	0.00154799		1	105	8.33171e-10	105	1.66634e-09	105	1.58699e-11	1.9057e-06
		0.9889	1249	1	1248	2	1250	0.0016	0.00154799		1	106	8.41131e-10	106	1.68226e-09	106	1.58704e-11	1.9057e-06
		0.9888	1250	1	1249	2	1251	0.00159872	0.00154799		1	107	8.49075e-10	107	1.69815e-09	107	1.58706e-11	1.9057e-06
		0.9887	1251	1	1250	2	1252	0.00159744	0.00154799		1	108	8.57035e-10	108	1.71407e-09	108	1.5871e-11	1.9057e-06
		0.9886	1253	1	1252	2	1254	0.0015949	0.00154799		1	109	8.64995e-10	109	1.72999e-09	109	1.58715e-11	1.9057e-06
		0.9885	1254	1	1253	2	1255	0.00159363	0.00154799		1	110	8.72971e-10	110	1.74594e-09	110	1.58722e-11	1.9057e-06
		0.9884	1256	1	1255	2	1257	0.00159109	0.00154799		1	111	8.80965e-10	111	1.76193e-09	111	1.58732e-11	1.9057e-06
		0.9882	1260	1	1259	2	1261	0.00158604	0.00154799		1	112	8.88957e-10	112	1.77791e-09	112	1.58742e-11	1.9057e-06
		0.988	1262	1	1261	2	1263	0.00158353	0.00154799		1	113	8.96982e-10	113	1.79396e-09	113	1.58758e-11	1.9057e-06
		0.9879	1263	1	1262	2	1264	0.00158228	0.00154799		1	114	9.05026e-10	114	1.81005e-09	114	1.58776e-11	1.9057e-06
		0.9877	1268	1	1267	2	1269	0.00157604	0.00154799		1	115	9.13117e-10	115	1.82623e-09	115	1.58803e-11	1.9057e-06
		0.9876	1269	1	1268	2	1270	0.0015748	0.00154799		1	116	9.21225e-10	116	1.84245e-09	116	1.58832e-11	1.9057e-06
		0.9875	1271	1	1270	2	1272	0.00157233	0.00154799		1	117	9.29399e-10	117	1.8588e-09	117	1.58872e-11	1.9057e-06
		0.9874	1274	1	1273	2	1275	0.00156863	0.00154799		1	118	9.37621e-10	118	1.87524e-09	118	1.58919e-11	1.9057e-06
		0.9873	1275	1	1274	2	1276	0.0015674	0.00154799		1	119	9.4596e-10	119	1.89192e-09	119	1.58985e-11	1.9057e-06
		0.9867	1276	1	1275	2	1277	0.00156617	0.00154799		1	120	9.54364e-10	120	1.90873e-09	120	1.59061e-11	1.9057e-06
		0.9865	1277	1	1276	2	1278	0.00156495	0.00154799		1	121	9.629e-10	121	1.9258e-09	121	1.59157e-11	1.9057e-06
		0.9864	1279	1	1278	2	1280	0.0015625	0.00154799		1	122	9.716e-10	122	1.9432e-09	122	1.59279e-11	1.9057e-06
		0.9863	1282	1	1281	2	1283	0.00155885	0.00154799		1	123	9.8048e-10	123	1.96096e-09	123	1.59428e-11	1.9057e-06
		0.9862	1283	1	1282	2	1284	0.00155763	0.00154799		1	124	9.89592e-10	124	1.97918e-09	124	1.59612e-11	1.9057e-06
		0.9861	1291	1	1290	2	1292	0.00154799	0.00154799		1	125	9.98983e-10	125	1.99797e-09	125	1.59837e-11	1.9057e-06
		0.9857	1294	2	1292	4	1296	0.00308642	0.00296956		1	126	1.00872e-09	126	2.01744e-09	126	1.60114e-11	1.9057e-06
		0.9855	1295	2	1293	4	1297	0.00308404	0.00296956		1	127	1.01887e-09	127	2.03773e-09	127	1.60451e-11	1.9057e-06
		0.9854	1296	2	1294	4	1298	0.00308166	0.00296956		1	128	1.02952e-09	128	2.05905e-09	128	1.60863e-11	1.9057e-06
		0.9853	1297	2	1295	4	1299	0.00307929	0.00296956		1	129	1.04077e-09	129	2.08155e-09	129	1.6136e-11	1.9057e-06
		0.9851	1299	2	1297	4	1301	0.00307456	0.00296956		1	130	1.05276e-09	130	2.10552e-09	130	1.61963e-11	1.9057e-06
		0.985	1302	2	1300	4	1304	0.00306748	0.00296956		1	131	1.06559e-09	131	2.13118e-09	131	1.62686e-11	1.9057e-06
		0.9849	1303	2	1301	4	1305	0.00306513	0.00296956		1	132	1.07947e-09	132	2.15894e-09	132	1.63556e-11	1.9057e-06
		0.9848	1304	2	1302	4	1306	0.00306279	0.00296956		1	133	1.09459e-09	133	2.18917e-09	133	1.64599e-11	1.9057e-06
		0.9846	1305	2	1303	4	1307	0.00306044	0.00296956		1	134	1.11116e-09	134	2.22233e-09	134	1.65845e-11	1.9057e-06
		0.9844	1306	2	1304	4	1308	0.0030581	0.00296956		1	135	1.12948e-09	135	2.25897e-09	135	1.67331e-11	1.9057e-06
		0.9843	1310	2	1308	4	1312	0.00304878	0.00296956		1	136	1.14983e-09	136	2.29966e-09	136	1.69093e-11	1.9057e-06
		0.9842	1311	2	1309	4	1313	0.00304646	0.00296956		1	137	1.17261e-09	137	2.34521e-09	137	1.71183e-11	1.9057e-06
		0.9841	1312	2	1310	4	1314	0.00304414	0.00296956		1	138	1.1982e-09	138	2.39639e-09	138	1.73652e-11	1.9057e-06
		0.9839	1314	2	1312	4	1316	0.00303951	0.00296956		1	139	1.22713e-09	139	2.45425e-09	139	1.76565e-11	1.9057e-06
		0.9838	1315	2	1313	4	1317	0.00303721	0.00296956		1	140	1.25992e-09	140	2.51984e-09	140	1.79989e-11	1.9057e-06
		0.9837	1317	2	1315	4	1319	0.0030326	0.00296956		1	141	1.29725e-09	141	2.59451e-09	141	1.84008e-11	1.9057e-06
		0.9836	1319	2	1317	4	1321	0.00302801	0.00296956		1	142	1.33983e-09	142	2.67967e-09	142	1.88709e-11	1.9057e-06
		0.9835	1321	2	1319	4	1323	0.00302343	0.00296956		1	143	1.38851e-09	143	2.77703e-09	143	1.94198e-11	1.9057e-06
		0.9834	1322	2	1320	4	1324	0.00302115	0.00296956		1	144	1.4443e-09	144	2.8886e-09	144	2.00597e-11	1.9057e-06
		0.9833	1323	2	1321	4	1325	0.00301887	0.00296956		1	145	1.50824e-09	145	3.01649e-09	145	2.08034e-11	1.9057e-06
		0.983	1325	2	1323	4	1327	0.00301432	0.00296956		1	146	1.58164e-09	146	3.16329e-09	146	2.16664e-11	1.9057e-06
		0.9829	1329	2	1327	4	1331	0.00300526	0.00296956		1	147	1.66588e-09	147	3.33176e-09	147	2.26651e-11	1.9057e-06
		0.9828	1330	2	1328	4	1332	0.003003	0.00296956		1	148	1.7626e-09	148	3.5252e-09	148	2.3819e-11	1.9057e-06
		0.9826	1332	2	1330	4	1334	0.0029985	0.00296956		1	149	1.8736e-09	149	3.7472e-09	149	2.5149e-11	1.9057e-06
		0.9824	1333	2	1331	4	1335	0.00299625	0.00296956		1	150	2.00096e-09	150	4.00192e-09	150	2.66795e-11	1.9057e-06
		0.9823	1334	2	1332	4	1336	0.00299401	0.00296956		1	151	2.14697e-09	151	4.29394e-09	151	2.84367e-11	1.9057e-06
		0.9822	1335	2	1333	4	1337	0.00299177	0.00296956		1	152	2.31428e-09	152	4.62856e-09	152	3.0451e-11	1.9057e-06
		0.982	1337	2	1335	4	1339	0.0029873	0.00296956		1	153	2.50575e-09	153	5.01149e-09	153	3.27549e-11	1.9057e-06
		0.9818	1339	2	1337	4	1341	0.00298285	0.00296956		1	154	2.72468e-09	154	5.44936e-09	154	3.53854e-11	1.9057e-06
		0.9816	1340	2	1338	4	1342	0.00298063	0.00296956		1	155	2.97478e-09	155	5.94956e-09	155	3.83843e-11	1.9057e-06
		0.9814	1341	2	1339	4	1343	0.00297841	0.00296956		1	156	3.26009e-09	156	6.52018e-09	156	4.1796e-11	1.9057e-06
		0.9811	1342	2	1340	4	1344	0.00297619	0.00296956		1	157	3.5852e-09	157	7.1704e-09	157	4.56714e-11	1.9057e-06
		0.981	1344	2	1342	4	1346	0.00297177	0.00296956		1	158	3.95516e-09	158	7.91032e-09	158	5.00653e-11	1.9057e-06
		0.9807	1345	2	1343	4	1347	0.00296956	0.00296956		1	159	4.37564e-09	159	8.75129e-09	159	5.50396e-11	1.9057e-06
		0.9805	1345	3	1342	6	1348	0.00445104	0.00417827		1	160	4.85288e-09	160	9.70577e-09	160	6.06611e-11	1.9057e-06
		0.9804	1348	3	1345	6	1351	0.00444115	0.00417827		1	161	5.39384e-09	161	1.07877e-08	161	6.70042e-11	1.9057e-06
		0.9803	1351	3	1348	6	1354	0.00443131	0.00417827		1	162	6.00615e-09	162	1.20123e-08	162	7.415e-11	1.9057e-06
		0.9802	1353	3	1350	6	1356	0.00442478	0.00417827		1	163	6.69834e-09	163	1.33967e-08	163	8.21883e-11	1.9057e-06
		0.9801	1354	3	1351	6	1357	0.00442152	0.00417827		1	164	7.47971e-09	164	1.49594e-08	164	9.1216e-11	1.9057e-06
		0.98	1356	3	1353	6	1359	0.00441501	0.00417827		1	165	8.36059e-09	165	1.67212e-08	165	1.0134e-10	1.9057e-06
		0.9799	1357	3	1354	6	1360	0.00441176	0.00417827		1	166	9.35229e-09	166	1.87046e-08	166	1.12678e-10	1.9057e-06
		0.9798	1358	3	1355	6	1361	0.00440852	0.00417827		1	167	1.04673e-08	167	2.09345e-08	167	1.25356e-10	1.9057e-06
		0.9795	1365	3	1362	6	1368	0.00438596	0.00417827		1	168	1.17192e-08	168	2.34383e-08	168	1.39514e-10	1.9057e-06
		0.9793	1366	3	1363	6	1369	0.00438276	0.00417827		1	169	1.31229e-08	169	2.62459e-08	169	1.55301e-10	1.9057e-06
		0.9789	1368	3	1365	6	1371	0.00437637	0.00417827		1	170	1.4695e-08	170	2.93899e-08	170	1.72882e-10	1.9057e-06
		0.9785	1369	3	1366	6	1372	0.00437318	0.00417827		1	171	1.64531e-08	171	3.29062e-08	171	1.92434e-10	1.9057e-06
		0.9783	1371	3	1368	6	1374	0.00436681	0.00417827		1	172	1.84169e-08	172	3.68339e-08	172	2.1415e-10	1.9057e-06
		0.9781	1372	3	1369	6	1375	0.00436364	0.00417827		1	173	2.06077e-08	173	4.12153e-08	173	2.38239e-10	1.9057e-06
		0.9778	1373	3	1370	6	1376	0.00436047	0.00417827		1	174	2.30485e-08	174	4.60971e-08	174	2.64926e-10	1.9057e-06
		0.9777	1374	3	1371	6	1377	0.0043573	0.00417827		1	175	2.57647e-08	175	5.15294e-08	175	2.94454e-10	1.9057e-06
		0.9773	1377	3	1374	6	1380	0.00434783	0.00417827		1	176	2.87836e-08	176	5.75672e-08	176	3.27086e-10	1.9057e-06
		0.9772	1378	3	1375	6	1381	0.00434468	0.00417827		1	177	3.2135e-08	177	6.42699e-08	177	3.63107e-10	1.9057e-06
		0.9771	1380	3	1377	6	1383	0.00433839	0.00417827		1	178	3.5851e-08	178	7.17019e-08	178	4.0282e-10	1.9057e-06
		0.9769	1381	3	1378	6	1384	0.00433526	0.00417827		1	179	3.99665e-08	179	7.9933e-08	179	4.46553e-10	1.9057e-06
		0.9765	1383	3	1380	6	1386	0.004329	0.00417827		1	180	4.45193e-08	180	8.90387e-08	180	4.94659e-10	1.9057e-06
		0.9764	1386	3	1383	6	1389	0.00431965	0.00417827		1	181	4.95502e-08	181	9.91005e-08	181	5.47516e-10	1.9057e-06
		0.9763	1387	3	1384	6	1390	0.00431655	0.00417827		1	182	5.51032e-08	182	1.10206e-07	182	6.0553e-10	1.9057e-06
		0.9762	1388	3	1385	6	1391	0.00431344	0.00417827		1	183	6.12258e-08	183	1.22452e-07	183	6.69134e-10	1.9057e-06
		0.9761	1390	3	1387	6	1393	0.00430725	0.00417827		1	184	6.7969e-08	184	1.35938e-07	184	7.38793e-10	1.9057e-06
		0.976	1391	3	1388	6	1394	0.00430416	0.00417827		1	185	7.53879e-08	185	1.50776e-07	185	8.15005e-10	1.9057e-06
		0.9759	1393	3	1390	6	1396	0.00429799	0.00417827		1	186	8.35418e-08	186	1.67084e-07	186	8.98299e-10	1.9057e-06
		0.9758	1395	3	1392	6	1398	0.00429185	0.00417827		1	187	9.24941e-08	187	1.84988e-07	187	9.89242e-10	1.9057e-06
		0.9756	1397	3	1394	6	1400	0.00428571	0.00417827		1	188	1.02313e-07	188	2.04626e-07	188	1.08844e-09	1.9057e-06
		0.9755	1398	3	1395	6	1401	0.00428266	0.00417827		1	189	1.13072e-07	189	2.26144e-07	189	1.19653e-09	1.9057e-06
		0.9752	1400	3	1397	6	1403	0.00427655	0.00417827		1	190	1.24849e-07	190	2.49699e-07	190	1.3142e-09	1.9057e-06
		0.9751	1402	3	1399	6	1405	0.00427046	0.00417827		1	191	1.37729e-07	191	2.75457e-07	191	1.44218e-09	1.9057e-06
		0.9749	1403	3	1400	6	1406	0.00426743	0.00417827		1	192	1.518e-07	192	3.03599e-07	192	1.58125e-09	1.9057e-06
		0.9747	1404	3	1401	6	1407	0.00426439	0.00417827		1	193	1.67158e-07	193	3.34317e-07	193	1.73221e-09	1.9057e-06
		0.9744	1406	3	1403	6	1409	0.00425834	0.00417827		1	194	1.83907e-07	194	3.67815e-07	194	1.89595e-09	1.9057e-06
		0.9743	1407	3	1404	6	1410	0.00425532	0.00417827		1	195	2.02155e-07	195	4.04311e-07	195	2.07339e-09	1.9057e-06
		0.9741	1409	3	1406	6	1412	0.00424929	0.00417827		1	196	2.22019e-07	196	4.44038e-07	196	2.2655e-09	1.9057e-06
		0.974	1411	3	1408	6	1414	0.00424328	0.00417827		1	197	2.43622e-07	197	4.87244e-07	197	2.47332e-09	1.9057e-06
		0.9739	1412	3	1409	6	1415	0.00424028	0.00417827		1	198	2.67096e-07	198	5.34193e-07	198	2.69794e-09	1.9057e-06
		0.9738	1413	3	1410	6	1416	0.00423729	0.00417827		1	199	2.92583e-07	199	5.85165e-07	199	2.94053e-09	1.9057e-06
		0.9737	1414	3	1411	6	1417	0.0042343	0.00417827		1	200	3.20229e-07	200	6.40458e-07	200	3.20229e-09	1.9057e-06
		0.9736	1416	3	1413	6	1419	0.00422833	0.00417827		1	201	3.50195e-07	201	7.0039e-07	201	3.48453e-09	1.9057e-06
		0.9735	1417	3	1414	6	1420	0.00422535	0.00417827		1	202	3.82647e-07	202	7.65294e-07	202	3.78859e-09	1.9057e-06
		0.9732	1418	3	1415	6	1421	0.00422238	0.00417827		1	203	4.17764e-07	203	8.35529e-07	203	4.1159e-09	1.9057e-06
		0.9729	1419	3	1416	6	1422	0.00421941	0.00417827		1	204	4.55735e-07	204	9.11469e-07	204	4.46799e-09	1.9057e-06
		0.9728	1420	3	1417	6	1423	0.00421644	0.00417827		1	205	4.96758e-07	205	9.93516e-07	205	4.84642e-09	1.9057e-06
		0.9725	1421	3	1418	6	1424	0.00421348	0.00417827		1	206	5.41046e-07	206	1.08209e-06	206	5.25287e-09	1.9057e-06
		0.9724	1422	3	1419	6	1425	0.00421053	0.00417827		1	207	5.88821e-07	207	1.17764e-06	207	5.68909e-09	1.9057e-06
		0.9723	1423	3	1420	6	1426	0.00420757	0.00417827		1	208	6.4032e-07	208	1.28064e-06	208	6.15692e-09	1.9057e-06
		0.9721	1424	3	1421	6	1427	0.00420463	0.00417827		1	209	6.95792e-07	209	1.39158e-06	209	6.65829e-09	1.9057e-06
		0.9719	1425	3	1422	6	1428	0.00420168	0.00417827		1	210	7.55499e-07	210	1.511e-06	210	7.19523e-09	1.9057e-06
		0.9716	1427	3	1424	6	1430	0.0041958	0.00417827		1	211	8.19719e-07	211	1.63944e-06	211	7.76985e-09	1.9057e-06
		0.9714	1428	3	1425	6	1431	0.00419287	0.00417827		1	212	8.88744e-07	212	1.77749e-06	212	8.38438e-09	1.9057e-06
		0.9713	1430	3	1427	6	1433	0.00418702	0.00417827		1	213	9.62883e-07	213	1.92577e-06	213	9.04115e-09	1.9057e-06
		0.971	1432	3	1429	6	1435	0.00418118	0.00417827		1	214	1.04246e-06	214	2.08492e-06	214	9.7426e-09	1.9057e-06
		0.9708	1433	3	1430	6	1436	0.00417827	0.00417827		1	215	1.12781e-06	215	2.25562e-06	215	1.04913e-08	1.9057e-06
		0.9707	1434	4	1430	8	1438	0.00556328	0.00546448		1	216	1.2193e-06	216	2.4386e-06	216	1.12898e-08	1.9057e-06
		0.9704	1437	4	1433	8	1441	0.0055517	0.00546448		1	217	1.3173e-06	217	2.6346e-06	217	1.2141e-08	1.9057e-06
		0.9703	1439	4	1435	8	1443	0.00554401	0.00546448		1	218	1.42221e-06	218	2.84442e-06	218	1.30478e-08	1.9057e-06
		0.9702	1440	4	1436	8	1444	0.00554017	0.00546448		1	219	1.53444e-06	219	3.06888e-06	219	1.40131e-08	1.9057e-06
		0.9698	1441	4	1437	8	1445	0.00553633	0.00546448		1	220	1.65443e-06	220	3.30886e-06	220	1.50403e-08	1.9057e-06
		0.9697	1442	4	1438	8	1446	0.0055325	0.00546448		1	221	1.78263e-06	221	3.56526e-06	221	1.61324e-08	1.9057e-06
		0.9696	1444	4	1440	8	1448	0.00552486	0.00546448		1	222	1.91952e-06	222	3.83905e-06	222	1.7293e-08	1.9057e-06
		0.9695	1446	4	1442	8	1450	0.00551724	0.00546448		1	223	2.06561e-06	223	4.13122e-06	223	1.85256e-08	1.9057e-06
		0.9694	1447	4	1443	8	1451	0.00551344	0.00546448		1	224	2.22141e-06	224	4.44282e-06	224	1.9834e-08	1.9057e-06
		0.9692	1449	4	1445	8	1453	0.00550585	0.00546448		1	225	2.38748e-06	225	4.77495e-06	225	2.1222e-08	1.9057e-06
		0.9691	1450	4	1446	8	1454	0.00550206	0.00546448		1	226	2.56438e-06	226	5.12876e-06	226	2.26936e-08	1.9057e-06
		0.9688	1451	4	1447	8	1455	0.00549828	0.00546448		1	227	2.75272e-06	227	5.50544e-06	227	2.4253e-08	1.9057e-06
		0.9687	1452	4	1448	8	1456	0.00549451	0.00546448		1	228	2.95312e-06	228	5.90624e-06	228	2.59046e-08	1.9057e-06
		0.9684	1453	4	1449	8	1457	0.00549073	0.00546448		1	229	3.16623e-06	229	6.33247e-06	229	2.76527e-08	1.9057e-06
		0.9682	1455	4	1451	8	1459	0.00548321	0.00546448		1	230	3.39275e-06	230	6.78549e-06	230	2.95021e-08	1.9057e-06
		0.968	1457	4	1453	8	1461	0.0054757	0.00546448		1	231	3.63336e-06	231	7.26673e-06	231	3.14577e-08	1.9057e-06
		0.9679	1459	4	1455	8	1463	0.00546822	0.00546448		1	232	3.88883e-06	232	7.77766e-06	232	3.35244e-08	1.9057e-06
		0.9676	1460	4	1456	8	1464	0.00546448	0.00546448		1	233	4.15991e-06	233	8.31983e-06	233	3.57074e-08	1.9057e-06
		0.9675	1460	5	1455	10	1465	0.00682594	0.00682594		1	234	4.44742e-06	234	8.89485e-06	234	3.80122e-08	1.9057e-06
		0.9671	1461	6	1455	12	1467	0.00817996	0.00778715		1	235	4.7522e-06	235	9.50439e-06	235	4.04442e-08	1.9057e-06
		0.967	1462	6	1456	12	1468	0.00817439	0.00778715		1	236	5.0751e-06	236	1.01502e-05	236	4.30093e-08	1.9057e-06
		0.9669	1463	6	1457	12	1469	0.00816882	0.00778715		1	237	5.41704e-06	237	1.08341e-05	237	4.57134e-08	1.9057e-06
		0.9667	1465	6	1459	12	1471	0.00815772	0.00778715		1	238	5.77897e-06	238	1.15579e-05	238	4.85628e-08	1.9057e-06
		0.9663	1466	6	1460	12	1472	0.00815217	0.00778715		1	239	6.16185e-06	239	1.23237e-05	239	5.15636e-08	1.9057e-06
		0.966	1467	6	1461	12	1473	0.00814664	0.00778715		1	240	6.56672e-06	240	1.31334e-05	240	5.47226e-08	1.9057e-06
		0.9659	1476	6	1470	12	1482	0.00809717	0.00778715		1	241	6.99462e-06	241	1.39892e-05	241	5.80466e-08	1.9057e-06
		0.9658	1477	6	1471	12	1483	0.00809171	0.00778715		1	242	7.44665e-06	242	1.48933e-05	242	6.15425e-08	1.9057e-06
		0.9657	1478	6	1472	12	1484	0.00808625	0.00778715		1	243	7.92395e-06	243	1.58479e-05	243	6.52177e-08	1.9057e-06
		0.9655	1479	6	1473	12	1485	0.00808081	0.00778715		1	244	8.42769e-06	244	1.68554e-05	244	6.90795e-08	1.9057e-06
		0.9654	1480	6	1474	12	1486	0.00807537	0.00778715		1	245	8.95912e-06	245	1.79182e-05	245	7.31356e-08	1.9057e-06
		0.9652	1481	6	1475	12	1487	0.00806994	0.00778715		1	246	9.51948e-06	246	1.9039e-05	246	7.73941e-08	1.9057e-06
		0.9649	1482	6	1476	12	1488	0.00806452	0.00778715		1	247	1.01101e-05	247	2.02202e-05	247	8.18631e-08	1.9057e-06
		0.9648	1484	6	1478	12	1490	0.00805369	0.00778715		1	248	1.07323e-05	248	2.14646e-05	248	8.6551e-08	1.9057e-06
		0.9647	1485	6	1479	12	1491	0.00804829	0.00778715		1	249	1.13876e-05	249	2.27752e-05	249	9.14665e-08	1.9057e-06
		0.9646	1486	6	1480	12	1492	0.0080429	0.00778715		1	250	1.20773e-05	250	2.41546e-05	250	9.66185e-08	1.9057e-06
		0.9645	1487	6	1481	12	1493	0.00803751	0.00778715		1	251	1.2803e-05	251	2.56061e-05	251	1.02016e-07	1.9057e-06
		0.9643	1488	6	1482	12	1494	0.00803213	0.00778715		1	252	1.35663e-05	252	2.71326e-05	252	1.07669e-07	1.9057e-06
		0.9642	1489	6	1483	12	1495	0.00802676	0.00778715		1	253	1.43687e-05	253	2.87374e-05	253	1.13587e-07	1.9057e-06
		0.9641	1491	6	1485	12	1497	0.00801603	0.00778715		1	254	1.52119e-05	254	3.04239e-05	254	1.19779e-07	1.9057e-06
		0.9638	1492	6	1486	12	1498	0.00801068	0.00778715		1	255	1.60977e-05	255	3.21954e-05	255	1.26257e-07	1.9057e-06
		0.9637	1493	6	1487	12	1499	0.00800534	0.00778715		1	256	1.70278e-05	256	3.40556e-05	256	1.3303e-07	1.9057e-06
		0.9632	1495	6	1489	12	1501	0.00799467	0.00778715		1	257	1.8004e-05	257	3.60081e-05	257	1.40109e-07	1.9057e-06
		0.9629	1496	6	1490	12	1502	0.00798935	0.00778715		1	258	1.90283e-05	258	3.80566e-05	258	1.47506e-07	1.9057e-06
		0.9627	1497	6	1491	12	1503	0.00798403	0.00778715		1	259	2.01026e-05	259	4.02051e-05	259	1.55232e-07	1.9057e-06
		0.9626	1498	6	1492	12	1504	0.00797872	0.00778715		1	260	2.12288e-05	260	4.24577e-05	260	1.63299e-07	1.9057e-06
		0.9625	1499	6	1493	12	1505	0.00797342	0.00778715		1	261	2.24092e-05	261	4.48183e-05	261	1.71718e-07	1.9057e-06
		0.9622	1500	6	1494	12	1506	0.00796813	0.00778715		1	262	2.36457e-05	262	4.72914e-05	262	1.80502e-07	1.9057e-06
		0.962	1501	6	1495	12	1507	0.00796284	0.00778715		1	263	2.49407e-05	263	4.98813e-05	263	1.89663e-07	1.9057e-06
		0.9617	1502	6	1496	12	1508	0.00795756	0.00778715		1	264	2.62963e-05	264	5.25926e-05	264	1.99214e-07	1.9057e-06
		0.9616	1504	6	1498	12	1510	0.00794702	0.00778715		1	265	2.77149e-05	265	5.54299e-05	265	2.09169e-07	1.9057e-06
		0.9612	1505	6	1499	12	1511	0.00794176	0.00778715		1	266	2.9199e-05	266	5.8398e-05	266	2.19541e-07	1.9057e-06
		0.9611	1506	6	1500	12	1512	0.00793651	0.00778715		1	267	3.07509e-05	267	6.15019e-05	267	2.30344e-07	1.9057e-06
		0.9604	1507	6	1501	12	1513	0.00793126	0.00778715		1	268	3.23733e-05	268	6.47467e-05	268	2.41592e-07	1.9057e-06
		0.9603	1509	6	1503	12	1515	0.00792079	0.00778715		1	269	3.40688e-05	269	6.81375e-05	269	2.53299e-07	1.9057e-06
		0.9602	1512	6	1506	12	1518	0.00790514	0.00778715		1	270	3.58399e-05	270	7.16798e-05	270	2.65481e-07	1.9057e-06
		0.9601	1513	6	1507	12	1519	0.00789993	0.00778715		1	271	3.76896e-05	271	7.53792e-05	271	2.78152e-07	1.9057e-06
		0.9599	1515	6	1509	12	1521	0.00788955	0.00778715		1	272	3.96206e-05	272	7.92412e-05	272	2.91328e-07	1.9057e-06
		0.9593	1516	6	1510	12	1522	0.00788436	0.00778715		1	273	4.16358e-05	273	8.32717e-05	273	3.05024e-07	1.9057e-06
		0.9588	1517	6	1511	12	1523	0.00787919	0.00778715		1	274	4.37383e-05	274	8.74767e-05	274	3.19258e-07	1.9057e-06
		0.9587	1518	6	1512	12	1524	0.00787402	0.00778715		1	275	4.59312e-05	275	9.18624e-05	275	3.34045e-07	1.9057e-06
		0.9585	1519	6	1513	12	1525	0.00786885	0.00778715		1	276	4.82175e-05	276	9.6435e-05	276	3.49402e-07	1.9057e-06
		0.9584	1520	6	1514	12	1526	0.0078637	0.00778715		1	277	5.06005e-05	277	0.000101201	277	3.65347e-07	1.9057e-06
		0.9583	1521	6	1515	12	1527	0.00785855	0.00778715		1	278	5.30836e-05	278	0.000106167	278	3.81897e-07	1.9057e-06
		0.9582	1522	6	1516	12	1528	0.0078534	0.00778715		1	279	5.56702e-05	279	0.00011134	279	3.99069e-07	1.9057e-06
		0.9581	1523	6	1517	12	1529	0.00784827	0.00778715		1	280	5.83637e-05	280	0.000116727	280	4.16883e-07	1.9057e-06
		0.958	1524	6	1518	12	1530	0.00784314	0.00778715		1	281	6.11677e-05	281	0.000122335	281	4.35357e-07	1.9057e-06
		0.9578	1526	6	1520	12	1532	0.0078329	0.00778715		1	282	6.40859e-05	282	0.000128172	282	4.5451e-07	1.9057e-06
		0.9574	1527	6	1521	12	1533	0.00782779	0.00778715		1	283	6.71221e-05	283	0.000134244	283	4.74361e-07	1.9057e-06
		0.9573	1528	6	1522	12	1534	0.00782269	0.00778715		1	284	7.028e-05	284	0.00014056	284	4.9493e-07	1.9057e-06
		0.9571	1529	6	1523	12	1535	0.00781759	0.00778715		1	285	7.35638e-05	285	0.000147128	285	5.16237e-07	1.9057e-06
		0.9565	1531	6	1525	12	1537	0.00780742	0.00778715		1	286	7.69773e-05	286	0.000153955	286	5.38303e-07	1.9057e-06
		0.9563	1532	6	1526	12	1538	0.00780234	0.00778715		1	287	8.05248e-05	287	0.00016105	287	5.61148e-07	1.9057e-06
		0.9556	1533	6	1527	12	1539	0.00779727	0.00778715		1	288	8.42104e-05	288	0.000168421	288	5.84794e-07	1.9057e-06
		0.9555	1535	6	1529	12	1541	0.00778715	0.00778715		1	289	8.80385e-05	289	0.000176077	289	6.09263e-07	1.9057e-06
		0.9554	1535	7	1528	14	1542	0.00907912	0.00906149		1	290	9.20135e-05	290	0.000184027	290	6.34576e-07	1.9057e-06
		0.9547	1536	7	1529	14	1543	0.00907323	0.00906149		1	291	9.61399e-05	291	0.00019228	291	6.60755e-07	1.9057e-06
		0.9545	1538	7	1531	14	1545	0.00906149	0.00906149		1	292	0.000100422	292	0.000200845	292	6.87825e-07	1.9057e-06
		0.9543	1538	8	1530	16	1546	0.0103493	0.010263		1	293	0.000104866	293	0.000209731	293	7.15807e-07	1.9057e-06
		0.9541	1542	8	1534	16	1550	0.0103226	0.010263		1	294	0.000109475	294	0.000218949	294	7.44725e-07	1.9057e-06
		0.954	1547	8	1539	16	1555	0.0102894	0.010263		1	295	0.000114254	295	0.000228508	295	7.74604e-07	1.9057e-06
		0.9529	1548	8	1540	16	1556	0.0102828	0.010263		1	296	0.000119209	296	0.000238418	296	8.05467e-07	1.9057e-06
		0.9528	1549	8	1541	16	1557	0.0102762	0.010263		1	297	0.000124345	297	0.00024869	297	8.3734e-07	1.9057e-06
		0.9524	1551	8	1543	16	1559	0.010263	0.010263		1	298	0.000129667	298	0.000259334	298	8.70248e-07	1.9057e-06
		0.9523	1551	9	1542	18	1560	0.0115385	0.011465		1	299	0.00013518	299	0.00027036	299	9.04215e-07	1.9057e-06
		0.9522	1552	9	1543	18	1561	0.0115311	0.011465		1	300	0.00014089	300	0.000281781	300	9.39269e-07	1.9057e-06
		0.9521	1553	9	1544	18	1562	0.0115237	0.011465		1	301	0.000146803	301	0.000293606	301	9.75435e-07	1.9057e-06
		0.9519	1554	9	1545	18	1563	0.0115163	0.011465		1	302	0.000152924	302	0.000305848	302	1.01274e-06	1.9057e-06
		0.9517	1555	9	1546	18	1564	0.011509	0.011465		1	303	0.000159259	303	0.000318517	303	1.05121e-06	1.9057e-06
		0.9515	1556	9	1547	18	1565	0.0115016	0.011465		1	304	0.000165813	304	0.000331627	304	1.09088e-06	1.9057e-06
		0.9514	1557	9	1548	18	1566	0.0114943	0.011465		1	305	0.000172594	305	0.000345188	305	1.13176e-06	1.9057e-06
		0.9513	1559	9	1550	18	1568	0.0114796	0.011465		1	306	0.000179607	306	0.000359214	306	1.1739e-06	1.9057e-06
		0.9511	1560	9	1551	18	1569	0.0114723	0.011465		1	307	0.000186858	307	0.000373717	307	1.21732e-06	1.9057e-06
		0.951	1561	9	1552	18	1570	0.011465	0.011465		1	308	0.000194355	308	0.000388709	308	1.26204e-06	1.9057e-06
		0.9503	1561	10	1551	20	1571	0.0127307	0.0126582		1	309	0.000202102	309	0.000404204	309	1.3081e-06	1.9057e-06
		0.9501	1563	10	1553	20	1573	0.0127146	0.0126582		1	310	0.000210108	310	0.000420216	310	1.35553e-06	1.9057e-06
		0.9499	1565	10	1555	20	1575	0.0126984	0.0126582		1	311	0.000218378	311	0.000436757	311	1.40436e-06	1.9057e-06
		0.9497	1566	10	1556	20	1576	0.0126904	0.0126582		1	312	0.000226921	312	0.000453841	312	1.45462e-06	1.9057e-06
		0.9495	1567	10	1557	20	1577	0.0126823	0.0126582		1	313	0.000235742	313	0.000471483	313	1.50634e-06	1.9057e-06
		0.9493	1568	10	1558	20	1578	0.0126743	0.0126582		1	314	0.000244849	314	0.000489697	314	1.55955e-06	1.9057e-06
		0.9492	1569	10	1559	20	1579	0.0126662	0.0126582		1	315	0.000254249	314.999	0.000508497	315	1.61428e-06	1.9057e-06
		0.9491	1570	10	1560	20	1580	0.0126582	0.0126582		1	316	0.000263949	315.999	0.000527899	316	1.67057e-06	1.9057e-06
		0.9484	1570	11	1559	22	1581	0.0139152	0.0137157		1	317	0.000273958	316.999	0.000547917	317	1.72844e-06	1.9057e-06
		0.9483	1572	11	1561	22	1583	0.0138977	0.0137157		1	318	0.000284283	317.999	0.000568566	318	1.78794e-06	1.9057e-06
		0.9482	1573	11	1562	22	1584	0.0138889	0.0137157		1	319	0.000294931	318.999	0.000589863	319	1.8491e-06	1.9057e-06
		0.948	1574	11	1563	22	1585	0.0138801	0.0137157		1	320	0.000305911	319.999	0.000611822	320	1.91194e-06	1.9057e-06
		0.9475	1575	11	1564	22	1586	0.0138714	0.0137157		1	321	0.000317231	320.999	0.000634461	321	1.97651e-06	1.9057e-06
		0.9471	1576	11	1565	22	1587	0.0138626	0.0137157		1	322	0.000328898	321.999	0.000657796	322	2.04284e-06	1.9057e-06
		0.9468	1578	11	1567	22	1589	0.0138452	0.0137157		1	323	0.000340921	322.999	0.000681843	323	2.11097e-06	1.9057e-06
		0.9466	1579	11	1568	22	1590	0.0138365	0.0137157		1	324	0.000353309	323.999	0.000706619	324	2.18092e-06	1.9057e-06
		0.946	1581	11	1570	22	1592	0.0138191	0.0137157		1	325	0.000366071	324.999	0.000732141	325	2.25274e-06	1.9057e-06
		0.9453	1583	11	1572	22	1594	0.0138018	0.0137157		1	326	0.000379214	325.999	0.000758428	326	2.32646e-06	1.9057e-06
		0.9452	1584	11	1573	22	1595	0.0137931	0.0137157		1	327	0.000392748	326.999	0.000785496	327	2.40213e-06	1.9057e-06
		0.9451	1585	11	1574	22	1596	0.0137845	0.0137157		1	328	0.000406682	327.999	0.000813363	328	2.47977e-06	1.9057e-06
		0.945	1587	11	1576	22	1598	0.0137672	0.0137157		1	329	0.000421025	328.999	0.000842049	329	2.55942e-06	1.9057e-06
		0.9447	1588	11	1577	22	1599	0.0137586	0.0137157		1	330	0.000435786	329.999	0.000871572	330	2.64113e-06	1.9057e-06
		0.9441	1590	11	1579	22	1601	0.0137414	0.0137157		1	331	0.000450975	330.999	0.00090195	331	2.72492e-06	1.9057e-06
		0.9434	1591	11	1580	22	1602	0.0137328	0.0137157		1	332	0.000466601	331.999	0.000933203	332	2.81085e-06	1.9057e-06
		0.9432	1592	11	1581	22	1603	0.0137243	0.0137157		1	333	0.000482675	332.999	0.00096535	333	2.89895e-06	1.9057e-06
		0.9431	1593	11	1582	22	1604	0.0137157	0.0137157		1	334	0.000499205	333.999	0.000998411	334	2.98925e-06	1.9057e-06
		0.943	1593	12	1581	24	1605	0.0149533	0.0145808		1	334.999	0.000516203	334.999	0.00103241	335	3.08181e-06	1.9057e-06
		0.9417	1594	12	1582	24	1606	0.014944	0.0145808		1	335.999	0.000533677	335.999	0.00106735	336	3.17665e-06	1.9057e-06
		0.9416	1595	12	1583	24	1607	0.0149347	0.0145808		1	336.999	0.000551639	336.999	0.00110328	337	3.27382e-06	1.9057e-06
		0.9413	1596	12	1584	24	1608	0.0149254	0.0145808		1	337.999	0.000570099	337.999	0.0011402	338	3.37337e-06	1.9057e-06
		0.9411	1597	12	1585	24	1609	0.0149161	0.0145808		1	338.999	0.000589068	338.999	0.00117814	339	3.47533e-06	1.9057e-06
		0.9407	1599	12	1587	24	1611	0.0148976	0.0145808		1	339.999	0.000608555	339.999	0.00121711	340	3.57974e-06	1.9057e-06
		0.9405	1601	12	1589	24	1613	0.0148791	0.0145808		1	340.999	0.000628573	340.999	0.00125715	341	3.68665e-06	1.9057e-06
		0.9403	1602	12	1590	24	1614	0.0148699	0.0145808		1	341.999	0.000649132	341.999	0.00129826	342	3.79609e-06	1.9057e-06
		0.9401	1603	12	1591	24	1615	0.0148607	0.0145808		1	342.999	0.000670244	342.999	0.00134049	343	3.90813e-06	1.9057e-06
		0.9398	1604	12	1592	24	1616	0.0148515	0.0145808		1	343.999	0.000691919	343.999	0.00138384	344	4.02278e-06	1.9057e-06
		0.9397	1606	12	1594	24	1618	0.0148331	0.0145808		1	344.999	0.000714169	344.999	0.00142834	345	4.14011e-06	1.9057e-06
		0.9395	1607	12	1595	24	1619	0.014824	0.0145808		1	345.999	0.000737006	345.999	0.00147401	346	4.26015e-06	1.9057e-06
		0.9393	1608	12	1596	24	1620	0.0148148	0.0145808		1	346.999	0.000760442	346.998	0.00152088	347	4.38295e-06	1.9057e-06
		0.9392	1609	12	1597	24	1621	0.0148057	0.0145808		1	347.999	0.000784489	347.998	0.00156898	348	4.50856e-06	1.9057e-06
		0.9389	1610	12	1598	24	1622	0.0147965	0.0145808		1	348.999	0.000809158	348.998	0.00161832	349	4.63701e-06	1.9057e-06
		0.9387	1611	12	1599	24	1623	0.0147874	0.0145808		1	349.999	0.000834462	349.998	0.00166892	350	4.76836e-06	1.9057e-06
		0.9383	1612	12	1600	24	1624	0.0147783	0.0145808		1	350.999	0.000860414	350.998	0.00172083	351	4.90264e-06	1.9057e-06
		0.9381	1613	12	1601	24	1625	0.0147692	0.0145808		1	351.999	0.000887026	351.998	0.00177405	352	5.03992e-06	1.9057e-06
		0.938	1614	12	1602	24	1626	0.0147601	0.0145808		1	352.999	0.00091431	352.998	0.00182862	353	5.18023e-06	1.9057e-06
		0.9374	1615	12	1603	24	1627	0.0147511	0.0145808		1	353.999	0.00094228	353.998	0.00188456	354	5.32361e-06	1.9057e-06
		0.9372	1617	12	1605	24	1629	0.014733	0.0145808		1	354.999	0.000970948	354.998	0.0019419	355	5.47013e-06	1.9057e-06
		0.9364	1618	12	1606	24	1630	0.0147239	0.0145808		1	355.999	0.00100033	355.998	0.00200066	356	5.61982e-06	1.9057e-06
		0.9361	1619	12	1607	24	1631	0.0147149	0.0145808		1	356.999	0.00103043	356.998	0.00206087	357	5.77274e-06	1.9057e-06
		0.936	1623	12	1611	24	1635	0.0146789	0.0145808		1	357.999	0.00106128	357.998	0.00212255	358	5.92892e-06	1.9057e-06
		0.9358	1624	12	1612	24	1636	0.0146699	0.0145808		1	358.999	0.00109287	358.998	0.00218575	359	6.08843e-06	1.9057e-06
		0.9353	1625	12	1613	24	1637	0.014661	0.0145808		1	359.999	0.00112524	359.998	0.00225047	360	6.25131e-06	1.9057e-06
		0.935	1626	12	1614	24	1638	0.014652	0.0145808		1	360.999	0.00115838	360.998	0.00231676	361	6.4176e-06	1.9057e-06
		0.9345	1627	12	1615	24	1639	0.0146431	0.0145808		1	361.999	0.00119231	361.998	0.00238463	362	6.58737e-06	1.9057e-06
		0.9342	1628	12	1616	24	1640	0.0146341	0.0145808		1	362.999	0.00122706	362.998	0.00245412	363	6.76065e-06	1.9057e-06
		0.9339	1629	12	1617	24	1641	0.0146252	0.0145808		1	363.999	0.00126263	363.997	0.00252525	364	6.93751e-06	1.9057e-06
		0.933	1630	12	1618	24	1642	0.0146163	0.0145808		1	364.999	0.00129903	364.997	0.00259806	365	7.11798e-06	1.9057e-06
		0.9329	1631	12	1619	24	1643	0.0146074	0.0145808		1	365.999	0.00133629	365.997	0.00267258	366	7.30212e-06	1.9057e-06
		0.9325	1633	12	1621	24	1645	0.0145897	0.0145808		1	366.999	0.00137441	366.997	0.00274882	367	7.48998e-06	1.9057e-06
		0.9323	1634	12	1622	24	1646	0.0145808	0.0145808		1	367.999	0.00141342	367.997	0.00282684	368	7.68162e-06	1.9057e-06
		0.9319	1634	13	1621	26	1647	0.0157863	0.015748		1	368.999	0.00145332	368.997	0.00290664	369	7.87708e-06	1.9057e-06
		0.9311	1635	13	1622	26	1648	0.0157767	0.015748		1	369.999	0.00149414	369.997	0.00298828	370	8.07642e-06	1.9057e-06
		0.9308	1636	13	1623	26	1649	0.0157671	0.015748		1	370.998	0.00153588	370.997	0.00307177	371	8.27969e-06	1.9057e-06
		0.9305	1637	13	1624	26	1650	0.0157576	0.015748		1	371.998	0.00157857	371.997	0.00315714	372	8.48695e-06	1.9057e-06
		0.9304	1638	13	1625	26	1651	0.015748	0.015748		1	372.998	0.00162222	372.997	0.00324444	373	8.69823e-06	1.9057e-06
		0.9299	1640	14	1626	28	1654	0.0169287	0.016898		1	373.998	0.00166684	373.997	0.00333369	374	8.91361e-06	1.9057e-06
		0.9294	1641	14	1627	28	1655	0.0169184	0.016898		1	374.998	0.00171246	374.997	0.00342492	375	9.13313e-06	1.9057e-06
		0.9286	1643	14	1629	28	1657	0.016898	0.016898		1	375.998	0.00175909	375.996	0.00351817	376	9.35684e-06	1.9057e-06
		0.9284	1643	15	1628	30	1658	0.0180941	0.018018		1	376.998	0.00180674	376.996	0.00361347	377	9.5848e-06	1.9057e-06
		0.9278	1644	15	1629	30	1659	0.0180832	0.018018		1	377.998	0.00185543	377.996	0.00371085	378	9.81707e-06	1.9057e-06
		0.9275	1645	15	1630	30	1660	0.0180723	0.018018		1	378.998	0.00190518	378.996	0.00381035	379	1.00537e-05	1.9057e-06
		0.927	1646	15	1631	30	1661	0.0180614	0.018018		1	379.998	0.001956	379.996	0.003912	380	1.02947e-05	1.9057e-06
		0.9268	1647	15	1632	30	1662	0.0180505	0.018018		1	380.998	0.00200792	380.996	0.00401584	381	1.05403e-05	1.9057e-06
		0.9264	1648	15	1633	30	1663	0.0180397	0.018018		1	381.998	0.00206095	381.996	0.00412189	382	1.07903e-05	1.9057e-06
		0.9262	1650	15	1635	30	1665	0.018018	0.018018		1	382.998	0.0021151	382.996	0.0042302	383	1.10449e-05	1.9057e-06
		0.9253	1650	16	1634	32	1666	0.0192077	0.0191388		1	383.998	0.0021704	383.996	0.0043408	384	1.13042e-05	1.9057e-06
		0.9252	1651	16	1635	32	1667	0.0191962	0.0191388		1	384.998	0.00222686	384.996	0.00445372	385	1.15681e-05	1.9057e-06
		0.9247	1652	16	1636	32	1668	0.0191847	0.0191388		1	385.998	0.0022845	385.995	0.004569	386	1.18368e-05	1.9057e-06
		0.9246	1653	16	1637	32	1669	0.0191732	0.0191388		1	386.998	0.00234334	386.995	0.00468668	387	1.21103e-05	1.9057e-06
		0.9244	1654	16	1638	32	1670	0.0191617	0.0191388		1	387.998	0.0024034	387.995	0.00480679	388	1.23886e-05	1.9057e-06
		0.924	1655	16	1639	32	1671	0.0191502	0.0191388		1	388.998	0.00246469	388.995	0.00492938	389	1.26719e-05	1.9057e-06
		0.9236	1656	16	1640	32	1672	0.0191388	0.0191388		1	389.997	0.00252723	389.995	0.00505447	390	1.29602e-05	1.9057e-06
		0.9232	1656	17	1639	34	1673	0.0203228	0.0201422		1	390.997	0.00259105	390.995	0.0051821	391	1.32535e-05	1.9057e-06
		0.923	1657	17	1640	34	1674	0.0203106	0.0201422		1	391.997	0.00265616	391.995	0.00531232	392	1.35518e-05	1.9057e-06
		0.9228	1658	17	1641	34	1675	0.0202985	0.0201422		1	392.997	0.00272258	392.995	0.00544516	393	1.38554e-05	1.9057e-06
		0.9222	1660	17	1643	34	1677	0.0202743	0.0201422		1	393.997	0.00279033	393.994	0.00558066	394	1.41641e-05	1.9057e-06
		0.9218	1661	17	1644	34	1678	0.0202622	0.0201422		1	394.997	0.00285942	394.994	0.00571885	395	1.44781e-05	1.9057e-06
		0.9217	1662	17	1645	34	1679	0.0202501	0.0201422		1	395.997	0.00292989	395.994	0.00585978	396	1.47974e-05	1.9057e-06
		0.9211	1664	17	1647	34	1681	0.0202261	0.0201422		1	396.997	0.00300174	396.994	0.00600349	397	1.51221e-05	1.9057e-06
		0.9207	1665	17	1648	34	1682	0.020214	0.0201422		1	397.997	0.003075	397.994	0.00615001	398	1.54523e-05	1.9057e-06
		0.9204	1666	17	1649	34	1683	0.020202	0.0201422		1	398.997	0.00314969	398.994	0.00629938	399	1.57879e-05	1.9057e-06
		0.9203	1667	17	1650	34	1684	0.02019	0.0201422		1	399.997	0.00322583	399.994	0.00645165	400	1.61291e-05	1.9057e-06
		0.9195	1668	17	1651	34	1685	0.020178	0.0201422		1	400.997	0.00330343	400.993	0.00660686	401	1.6476e-05	1.9057e-06
		0.9194	1669	17	1652	34	1686	0.0201661	0.0201422		1	401.997	0.00338252	401.993	0.00676504	402	1.68285e-05	1.9057e-06
		0.9187	1671	17	1654	34	1688	0.0201422	0.0201422		1	402.997	0.00346312	402.993	0.00692624	403	1.71867e-05	1.9057e-06
		0.9176	1678	18	1660	36	1696	0.0212264	0.0209913		1	403.996	0.00354525	403.993	0.0070905	404	1.75508e-05	1.9057e-06
		0.9174	1679	18	1661	36	1697	0.0212139	0.0209913		1	404.996	0.00362893	404.993	0.00725787	405	1.79207e-05	1.9057e-06
		0.9172	1680	18	1662	36	1698	0.0212014	0.0209913		1	405.996	0.00371418	405.993	0.00742837	406	1.82965e-05	1.9057e-06
		0.9171	1681	18	1663	36	1699	0.0211889	0.0209913		1	406.996	0.00380103	406.992	0.00760206	407	1.86783e-05	1.9057e-06
		0.917	1682	18	1664	36	1700	0.0211765	0.0209913		1	407.996	0.00388949	407.992	0.00777897	408	1.90661e-05	1.9057e-06
		0.9169	1684	18	1666	36	1702	0.0211516	0.0209913		1	408.996	0.00397958	408.992	0.00795916	409	1.946e-05	1.9057e-06
		0.9163	1685	18	1667	36	1703	0.0211392	0.0209913		1	409.996	0.00407133	409.992	0.00814266	410	1.98601e-05	1.9057e-06
		0.916	1686	18	1668	36	1704	0.0211268	0.0209913		1	410.996	0.00416476	410.992	0.00832952	411	2.02665e-05	1.9057e-06
		0.9159	1687	18	1669	36	1705	0.0211144	0.0209913		1	411.996	0.00425989	411.991	0.00851978	412	2.06791e-05	1.9057e-06
		0.9157	1689	18	1671	36	1707	0.0210896	0.0209913		1	412.996	0.00435674	412.991	0.00871348	413	2.1098e-05	1.9057e-06
		0.9154	1690	18	1672	36	1708	0.0210773	0.0209913		1	413.996	0.00445534	413.991	0.00891068	414	2.15234e-05	1.9057e-06
		0.9147	1691	18	1673	36	1709	0.021065	0.0209913		1	414.995	0.0045557	414.991	0.0091114	415	2.19552e-05	1.9057e-06
		0.9138	1692	18	1674	36	1710	0.0210526	0.0209913		1	415.995	0.00465786	415.991	0.00931571	416	2.23935e-05	1.9057e-06
		0.9136	1693	18	1675	36	1711	0.0210403	0.0209913		1	416.995	0.00476182	416.99	0.00952364	417	2.28385e-05	1.9057e-06
		0.9134	1694	18	1676	36	1712	0.021028	0.0209913		1	417.995	0.00486762	417.99	0.00973525	418	2.32901e-05	1.9057e-06
		0.9133	1695	18	1677	36	1713	0.0210158	0.0209913		1	418.995	0.00497528	418.99	0.00995057	419	2.37484e-05	1.9057e-06
		0.9132	1696	18	1678	36	1714	0.0210035	0.0209913		1	419.995	0.00508482	419.99	0.0101696	420	2.42134e-05	1.9057e-06
		0.9128	1697	18	1679	36	1715	0.0209913	0.0209913		1	420.995	0.00519627	420.99	0.0103925	421	2.46854e-05	1.9057e-06
		0.9127	1699	19	1680	38	1718	0.0221187	0.0220674		1	421.995	0.00530964	421.989	0.0106193	422	2.51642e-05	1.9057e-06
		0.9125	1701	19	1682	38	1720	0.022093	0.0220674		1	422.995	0.00542496	422.989	0.0108499	423	2.565e-05	1.9057e-06
		0.9123	1703	19	1684	38	1722	0.0220674	0.0220674		1	423.994	0.00554226	423.989	0.0110845	424	2.61428e-05	1.9057e-06
		0.912	1703	20	1683	40	1723	0.0232153	0.0231884		1	424.994	0.00566156	424.989	0.0113231	425	2.66426e-05	1.9057e-06
		0.9117	1704	20	1684	40	1724	0.0232019	0.0231884		1	425.994	0.00578288	425.988	0.0115658	426	2.71497e-05	1.9057e-06
		0.9116	1705	20	1685	40	1725	0.0231884	0.0231884		1	426.994	0.00590625	426.988	0.0118125	427	2.76639e-05	1.9057e-06
		0.9109	1705	21	1684	42	1726	0.0243337	0.0242775		1	427.994	0.00603169	427.988	0.0120634	428	2.81854e-05	1.9057e-06
		0.9107	1707	21	1686	42	1728	0.0243056	0.0242775		1	428.994	0.00615922	428.988	0.0123184	429	2.87143e-05	1.9057e-06
		0.9105	1708	21	1687	42	1729	0.0242915	0.0242775		1	429.994	0.00628887	429.987	0.0125777	430	2.92506e-05	1.9057e-06
		0.9101	1709	21	1688	42	1730	0.0242775	0.0242775		1	430.994	0.00642067	430.987	0.0128413	431	2.97943e-05	1.9057e-06
		0.9093	1709	22	1687	44	1731	0.0254188	0.0247887		1	431.993	0.00655463	431.987	0.0131093	432	3.03455e-05	1.9057e-06
		0.9086	1711	22	1689	44	1733	0.0253895	0.0247887		1	432.993	0.00669079	432.987	0.0133816	433	3.09044e-05	1.9057e-06
		0.9085	1712	22	1690	44	1734	0.0253749	0.0247887		1	433.993	0.00682917	433.986	0.0136583	434	3.14708e-05	1.9057e-06
		0.9078	1713	22	1691	44	1735	0.0253602	0.0247887		1	434.993	0.0069698	434.986	0.0139396	435	3.2045e-05	1.9057e-06
		0.9076	1714	22	1692	44	1736	0.0253456	0.0247887		1	435.993	0.00711269	435.986	0.0142254	436	3.2627e-05	1.9057e-06
		0.9074	1715	22	1693	44	1737	0.025331	0.0247887		1	436.993	0.00725788	436.985	0.0145158	437	3.32168e-05	1.9057e-06
		0.9067	1716	22	1694	44	1738	0.0253165	0.0247887		1	437.993	0.00740539	437.985	0.0148108	438	3.38145e-05	1.9057e-06
		0.9061	1717	22	1695	44	1739	0.0253019	0.0247887		1	438.992	0.00755524	438.985	0.0151105	439	3.44202e-05	1.9057e-06
		0.9055	1718	22	1696	44	1740	0.0252874	0.0247887		1	439.992	0.00770747	439.985	0.0154149	440	3.50339e-05	1.9057e-06
		0.9052	1719	22	1697	44	1741	0.0252728	0.0247887		1	440.992	0.00786209	440.984	0.0157242	441	3.56557e-05	1.9057e-06
		0.9049	1720	22	1698	44	1742	0.0252583	0.0247887		1	441.992	0.00801914	441.984	0.0160383	442	3.62857e-05	1.9057e-06
		0.9039	1721	22	1699	44	1743	0.0252438	0.0247887		1	442.992	0.00817864	442.984	0.0163573	443	3.69239e-05	1.9057e-06
		0.9025	1722	22	1700	44	1744	0.0252294	0.0247887		1	443.992	0.00834061	443.983	0.0166812	444	3.75703e-05	1.9057e-06
		0.9024	1723	22	1701	44	1745	0.0252149	0.0247887		1	444.991	0.00850509	444.983	0.0170102	445	3.82251e-05	1.9057e-06
		0.9019	1725	22	1703	44	1747	0.025186	0.0247887		1	445.991	0.0086721	445.983	0.0173442	446	3.88883e-05	1.9057e-06
		0.9016	1726	22	1704	44	1748	0.0251716	0.0247887		1	446.991	0.00884167	446.982	0.0176833	447	3.956e-05	1.9057e-06
		0.9013	1728	22	1706	44	1750	0.0251429	0.0247887		1	447.991	0.00901381	447.982	0.0180276	448	4.02402e-05	1.9057e-06
		0.9011	1729	22	1707	44	1751	0.0251285	0.0247887		1	448.991	0.00918857	448.982	0.0183771	449	4.09291e-05	1.9057e-06
		0.9003	1730	22	1708	44	1752	0.0251142	0.0247887		1	449.991	0.00936597	449.981	0.0187319	450	4.16265e-05	1.9057e-06
		0.8999	1731	22	1709	44	1753	0.0250998	0.0247887		1	450.99	0.00954603	450.981	0.0190921	451	4.23327e-05	1.9057e-06
		0.8998	1732	22	1710	44	1754	0.0250855	0.0247887		1	451.99	0.00972878	451.981	0.0194576	452	4.30477e-05	1.9057e-06
		0.8996	1733	22	1711	44	1755	0.0250712	0.0247887		1	452.99	0.00991425	452.98	0.0198285	453	4.37715e-05	1.9057e-06
		0.8992	1734	22	1712	44	1756	0.0250569	0.0247887		1	453.99	0.0101025	453.98	0.0202049	454	4.45043e-05	1.9057e-06
		0.8984	1735	22	1713	44	1757	0.0250427	0.0247887		1	454.99	0.0102935	454.979	0.0205869	455	4.5246e-05	1.9057e-06
		0.8981	1736	22	1714	44	1758	0.0250284	0.0247887		1	455.99	0.0104873	455.979	0.0209745	456	4.59968e-05	1.9057e-06
		0.898	1737	22	1715	44	1759	0.0250142	0.0247887		1	456.989	0.0106839	456.979	0.0213678	457	4.67566e-05	1.9057e-06
		0.8974	1738	22	1716	44	1760	0.025	0.0247887		1	457.989	0.0108834	457.978	0.0217667	458	4.75256e-05	1.9057e-06
		0.8972	1739	22	1717	44	1761	0.0249858	0.0247887		1	458.989	0.0110857	458.978	0.0221715	459	4.83039e-05	1.9057e-06
		0.8971	1740	22	1718	44	1762	0.0249716	0.0247887		1	459.989	0.011291	459.977	0.0225821	460	4.90914e-05	1.9057e-06
		0.8969	1741	22	1719	44	1763	0.0249575	0.0247887		1	460.989	0.0114993	460.977	0.0229985	461	4.98883e-05	1.9057e-06
		0.8967	1744	22	1722	44	1766	0.0249151	0.0247887		1	461.988	0.0117105	461.977	0.0234209	462	5.06946e-05	1.9057e-06
		0.8964	1745	22	1723	44	1767	0.024901	0.0247887		1	462.988	0.0119247	462.976	0.0238493	463	5.15104e-05	1.9057e-06
		0.8959	1746	22	1724	44	1768	0.0248869	0.0247887		1	463.988	0.0121419	463.976	0.0242838	464	5.23357e-05	1.9057e-06
		0.8952	1747	22	1725	44	1769	0.0248728	0.0247887		1	464.988	0.0123622	464.975	0.0247244	465	5.31707e-05	1.9057e-06
		0.8951	1748	22	1726	44	1770	0.0248588	0.0247887		1	465.987	0.0125856	465.975	0.0251711	466	5.40152e-05	1.9057e-06
		0.8939	1749	22	1727	44	1771	0.0248447	0.0247887		1	466.987	0.012812	466.974	0.0256241	467	5.48696e-05	1.9057e-06
		0.8928	1751	22	1729	44	1773	0.0248167	0.0247887		1	467.987	0.0130417	467.974	0.0260834	468	5.57337e-05	1.9057e-06
		0.8919	1752	22	1730	44	1774	0.0248027	0.0247887		1	468.987	0.0132745	468.973	0.026549	469	5.66076e-05	1.9057e-06
		0.8916	1753	22	1731	44	1775	0.0247887	0.0247887		1	469.986	0.0135105	469.973	0.027021	470	5.74915e-05	1.9057e-06
		0.8915	1753	23	1730	46	1776	0.0259009	0.0256553		1	470.986	0.0137498	470.973	0.0274995	471	5.83854e-05	1.9057e-06
		0.8914	1755	23	1732	46	1778	0.0258718	0.0256553		1	471.986	0.0139923	471.972	0.0279845	472	5.92893e-05	1.9057e-06
		0.8912	1756	23	1733	46	1779	0.0258572	0.0256553		1	472.986	0.0142381	472.972	0.0284761	473	6.02032e-05	1.9057e-06
		0.8907	1757	23	1734	46	1780	0.0258427	0.0256553		1	473.986	0.0144872	473.971	0.0289744	474	6.11274e-05	1.9057e-06
		0.8895	1758	23	1735	46	1781	0.0258282	0.0256553		1	474.985	0.0147397	474.971	0.0294793	475	6.20618e-05	1.9057e-06
		0.8892	1759	23	1736	46	1782	0.0258137	0.0256553		1	475.985	0.0149955	475.97	0.0299911	476	6.30064e-05	1.9057e-06
		0.8889	1760	23	1737	46	1783	0.0257992	0.0256553		1	476.985	0.0152548	476.969	0.0305096	477	6.39614e-05	1.9057e-06
		0.8882	1762	23	1739	46	1785	0.0257703	0.0256553		1	477.984	0.0155175	477.969	0.031035	478	6.49269e-05	1.9057e-06
		0.887	1763	23	1740	46	1786	0.0257559	0.0256553		1	478.984	0.0157837	478.968	0.0315674	479	6.59027e-05	1.9057e-06
		0.8868	1764	23	1741	46	1787	0.0257415	0.0256553		1	479.984	0.0160534	479.968	0.0321068	480	6.68892e-05	1.9057e-06
		0.8866	1765	23	1742	46	1788	0.0257271	0.0256553		1	480.984	0.0163266	480.967	0.0326533	481	6.78862e-05	1.9057e-06
		0.8864	1766	23	1743	46	1789	0.0257127	0.0256553		1	481.983	0.0166034	481.967	0.0332068	482	6.88938e-05	1.9057e-06
		0.8857	1767	23	1744	46	1790	0.0256983	0.0256553		1	482.983	0.0168838	482.966	0.0337676	483	6.99122e-05	1.9057e-06
		0.8855	1768	23	1745	46	1791	0.025684	0.0256553		1	483.983	0.0171678	483.966	0.0343356	484	7.09414e-05	1.9057e-06
		0.8852	1769	23	1746	46	1792	0.0256696	0.0256553		1	484.983	0.0174555	484.965	0.034911	485	7.19814e-05	1.9057e-06
		0.885	1770	23	1747	46	1793	0.0256553	0.0256553		1	485.982	0.0177468	485.965	0.0354937	486	7.30322e-05	1.9057e-06
		0.8837	1770	24	1746	48	1794	0.0267559	0.0265781		1	486.982	0.0180419	486.964	0.0360838	487	7.40941e-05	1.9057e-06
		0.8825	1771	24	1747	48	1795	0.0267409	0.0265781		1	487.982	0.0183407	487.963	0.0366815	488	7.51669e-05	1.9057e-06
		0.8824	1772	24	1748	48	1796	0.0267261	0.0265781		1	488.981	0.0186433	488.963	0.0372867	489	7.62509e-05	1.9057e-06
		0.8823	1774	24	1750	48	1798	0.0266963	0.0265781		1	489.981	0.0189498	489.962	0.0378995	490	7.73459e-05	1.9057e-06
		0.881	1775	24	1751	48	1799	0.0266815	0.0265781		1	490.981	0.01926	490.961	0.03852	491	7.84522e-05	1.9057e-06
		0.8808	1776	24	1752	48	1800	0.0266667	0.0265781		1	491.98	0.0195742	491.961	0.0391483	492	7.95697e-05	1.9057e-06
		0.8806	1777	24	1753	48	1801	0.0266519	0.0265781		1	492.98	0.0198922	492.96	0.0397844	493	8.06986e-05	1.9057e-06
		0.8805	1778	24	1754	48	1802	0.0266371	0.0265781		1	493.98	0.0202142	493.96	0.0404284	494	8.18388e-05	1.9057e-06
		0.8793	1780	24	1756	48	1804	0.0266075	0.0265781		1	494.979	0.0205401	494.959	0.0410803	495	8.29904e-05	1.9057e-06
		0.879	1781	24	1757	48	1805	0.0265928	0.0265781		1	495.979	0.0208701	495.958	0.0417402	496	8.41536e-05	1.9057e-06
		0.8788	1782	24	1758	48	1806	0.0265781	0.0265781		1	496.979	0.0212041	496.958	0.0424081	497	8.53283e-05	1.9057e-06
		0.8783	1782	25	1757	50	1807	0.0276702	0.0276396		1	497.978	0.0215421	497.957	0.0430843	498	8.65146e-05	1.9057e-06
		0.878	1783	25	1758	50	1808	0.0276549	0.0276396		1	498.978	0.0218843	498.956	0.0437686	499	8.77125e-05	1.9057e-06
		0.8768	1784	25	1759	50	1809	0.0276396	0.0276396		1	499.978	0.0222306	499.956	0.0444611	500	8.89223e-05	1.9057e-06
		0.8766	1787	26	1761	52	1813	0.0286817	0.0285714		1	500.977	0.022581	500.955	0.045162	501	9.01438e-05	1.9057e-06
		0.8763	1788	26	1762	52	1814	0.0286659	0.0285714		1	501.977	0.0229357	501.954	0.0458713	502	9.13771e-05	1.9057e-06
		0.8756	1789	26	1763	52	1815	0.0286501	0.0285714		1	502.977	0.0232945	502.953	0.046589	503	9.26224e-05	1.9057e-06
		0.8755	1791	26	1765	52	1817	0.0286186	0.0285714		1	503.976	0.0236577	503.953	0.0473153	504	9.38796e-05	1.9057e-06
		0.8752	1792	26	1766	52	1818	0.0286029	0.0285714		1	504.976	0.0240251	504.952	0.0480501	505	9.51488e-05	1.9057e-06
		0.875	1793	26	1767	52	1819	0.0285871	0.0285714		1	505.976	0.0243968	505.951	0.0487936	506	9.64301e-05	1.9057e-06
		0.8746	1794	26	1768	52	1820	0.0285714	0.0285714		1	506.975	0.0247729	506.95	0.0495458	507	9.77236e-05	1.9057e-06
		0.8745	1794	27	1767	54	1821	0.029654	0.0295567		1	507.975	0.0251534	507.95	0.0503068	508	9.90292e-05	1.9057e-06
		0.8739	1795	27	1768	54	1822	0.0296378	0.0295567		1	508.974	0.0255383	508.949	0.0510767	509	0.000100347	1.9057e-06
		0.8737	1796	27	1769	54	1823	0.0296215	0.0295567		1	509.974	0.0259277	509.948	0.0518554	510	0.000101677	1.9057e-06
		0.8735	1797	27	1770	54	1824	0.0296053	0.0295567		1	510.974	0.0263216	510.947	0.0526432	511	0.00010302	1.9057e-06
		0.8719	1798	27	1771	54	1825	0.029589	0.0295567		1	511.973	0.02672	511.947	0.0534399	512	0.000104375	1.9057e-06
		0.8717	1799	27	1772	54	1826	0.0295728	0.0295567		0.9999	512.973	0.0271229	512.946	0.0542458	513	0.000105742	0.00131109
		0.8713	1800	27	1773	54	1827	0.0295567	0.0295567		0.9999	513.972	0.0275304	513.945	0.0550609	514	0.000107122	0.00131109
		0.8709	1800	28	1772	56	1828	0.0306346	0.0305344		0.9999	514.972	0.0279426	514.944	0.0558852	515	0.000108515	0.00131109
		0.8702	1801	28	1773	56	1829	0.0306178	0.0305344		0.9999	515.972	0.0283594	515.943	0.0567188	516	0.00010992	0.00131109
		0.8686	1802	28	1774	56	1830	0.0306011	0.0305344		0.9999	516.971	0.0287809	516.942	0.0575618	517	0.000111338	0.00131109
		0.8683	1804	28	1776	56	1832	0.0305677	0.0305344		0.9999	517.971	0.0292071	517.942	0.0584142	518	0.000112769	0.00131109
		0.868	1805	28	1777	56	1833	0.030551	0.0305344		0.9999	518.97	0.0296381	518.941	0.0592762	519	0.000114212	0.00131109
		0.8679	1806	28	1778	56	1834	0.0305344	0.0305344		0.9999	519.97	0.0300739	519.94	0.0601477	520	0.000115669	0.00131109
		0.8678	1806	29	1777	58	1835	0.0316076	0.0314704		0.9999	520.969	0.0305145	520.939	0.0610289	521	0.000117138	0.00131109
		0.8661	1807	29	1778	58	1836	0.0315904	0.0314704		0.9999	521.969	0.0309599	521.938	0.0619198	522	0.00011862	0.00131109
		0.866	1808	29	1779	58	1837	0.0315732	0.0314704		0.9999	522.969	0.0314102	522.937	0.0628205	523	0.000120116	0.00131109
		0.8657	1809	29	1780	58	1838	0.031556	0.0314704		0.9999	523.968	0.0318655	523.936	0.063731	524	0.000121624	0.00131109
		0.8653	1810	29	1781	58	1839	0.0315389	0.0314704		0.9999	524.968	0.0323257	524.935	0.0646514	525	0.000123146	0.00131109
		0.8645	1812	29	1783	58	1841	0.0315046	0.0314704		0.9999	525.967	0.0327909	525.934	0.0655819	526	0.00012468	0.00131109
		0.8623	1813	29	1784	58	1842	0.0314875	0.0314704		0.9999	526.967	0.0332612	526.933	0.0665223	527	0.000126228	0.00131109
		0.8618	1814	29	1785	58	1843	0.0314704	0.0314704		0.9999	527.966	0.0337365	527.933	0.0674729	528	0.00012779	0.00131109
		0.8612	1814	30	1784	60	1844	0.032538	0.03245		0.9999	528.966	0.0342169	528.932	0.0684337	529	0.000129364	0.00131109
		0.8607	1815	30	1785	60	1845	0.0325203	0.03245		0.9999	529.965	0.0347024	529.931	0.0694048	530	0.000130952	0.00131109
		0.8605	1817	30	1787	60	1847	0.0324851	0.03245		0.9999	530.965	0.0351931	530.93	0.0703861	531	0.000132554	0.00131109
		0.8603	1818	30	1788	60	1848	0.0324675	0.03245		0.9999	531.964	0.035689	531.929	0.0713779	532	0.000134169	0.00131109
		0.8601	1819	30	1789	60	1849	0.03245	0.03245		0.9999	532.964	0.0361901	532.928	0.0723801	533	0.000135798	0.00131109
		0.859	1819	31	1788	62	1850	0.0335135	0.0334232		0.9999	533.963	0.0366964	533.927	0.0733929	534	0.00013744	0.00131109
		0.8589	1821	31	1790	62	1852	0.0334773	0.0334232		0.9999	534.963	0.0372081	534.926	0.0744163	535	0.000139096	0.00131109
		0.858	1822	31	1791	62	1853	0.0334593	0.0334232		0.9999	535.962	0.0377251	535.925	0.0754503	536	0.000140765	0.00131109
		0.8573	1823	31	1792	62	1854	0.0334412	0.0334232		0.9999	536.962	0.0382475	536.924	0.0764951	537	0.000142449	0.00131109
		0.8568	1824	31	1793	62	1855	0.0334232	0.0334232		0.9999	537.961	0.0387753	537.922	0.0775507	538	0.000144146	0.00131109
		0.8561	1824	32	1792	64	1856	0.0344828	0.0344828		0.9999	538.961	0.0393086	538.921	0.0786171	539	0.000145857	0.00131109
		0.8553	1824	33	1791	66	1857	0.0355412	0.0354077		0.9999	539.96	0.0398473	539.92	0.0796945	540	0.000147582	0.00131109
		0.8552	1825	33	1792	66	1858	0.0355221	0.0354077		0.9999	540.96	0.0403915	540.919	0.080783	541	0.000149322	0.00131109
		0.8548	1827	33	1794	66	1860	0.0354839	0.0354077		0.9999	541.959	0.0409412	541.918	0.0818825	542	0.000151075	0.00131109
		0.8545	1830	33	1797	66	1863	0.0354267	0.0354077		0.9999	542.959	0.0414966	542.917	0.0829932	543	0.000152842	0.00131109
		0.8528	1831	33	1798	66	1864	0.0354077	0.0354077		0.9999	543.958	0.0420575	543.916	0.0841151	544	0.000154623	0.00131109
		0.8526	1831	34	1797	68	1865	0.0364611	0.0360934		0.9999	544.957	0.0426241	544.915	0.0852482	545	0.000156419	0.00131109
		0.8525	1832	34	1798	68	1866	0.0364416	0.0360934		0.9999	545.957	0.0431964	545.914	0.0863928	546	0.000158229	0.00131109
		0.852	1833	34	1799	68	1867	0.0364221	0.0360934		0.9999	546.956	0.0437744	546.912	0.0875488	547	0.000160053	0.00131109
		0.8516	1834	34	1800	68	1868	0.0364026	0.0360934		0.9999	547.956	0.0443582	547.911	0.0887163	548	0.000161891	0.00131109
		0.8511	1835	34	1801	68	1869	0.0363831	0.0360934		0.9999	548.955	0.0449477	548.91	0.0898954	549	0.000163744	0.00131109
		0.8503	1836	34	1802	68	1870	0.0363636	0.0360934		0.9999	549.954	0.0455431	549.909	0.0910861	550	0.000165611	0.00131109
		0.8487	1838	34	1804	68	1872	0.0363248	0.0360934		0.9999	550.954	0.0461443	550.908	0.0922886	551	0.000167493	0.00131109
		0.8481	1839	34	1805	68	1873	0.0363054	0.0360934		0.9999	551.953	0.0467514	551.906	0.0935028	552	0.000169389	0.00131109
		0.848	1840	34	1806	68	1874	0.036286	0.0360934		0.9999	552.953	0.0473645	552.905	0.0947289	553	0.0001713	0.00131109
		0.8479	1842	34	1808	68	1876	0.0362473	0.0360934		0.9999	553.952	0.0479835	553.904	0.0959669	554	0.000173226	0.00131109
		0.8448	1844	34	1810	68	1878	0.0362087	0.0360934		0.9999	554.951	0.0486085	554.903	0.097217	555	0.000175166	0.00131109
		0.8445	1845	34	1811	68	1879	0.0361895	0.0360934		0.9999	555.951	0.0492395	555.902	0.0984791	556	0.000177121	0.00131109
		0.8444	1846	34	1812	68	1880	0.0361702	0.0360934		0.9999	556.95	0.0498767	556.9	0.0997533	557	0.00017909	0.00131109
		0.844	1847	34	1813	68	1881	0.036151	0.0360934		0.9999	557.949	0.0505199	557.899	0.10104	558	0.000181075	0.00131109
		0.8427	1848	34	1814	68	1882	0.0361318	0.0360934		0.9999	558.949	0.0511693	558.898	0.102339	559	0.000183074	0.00131109
		0.8424	1849	34	1815	68	1883	0.0361126	0.0360934		0.9999	559.948	0.0518248	559.896	0.10365	560	0.000185089	0.00131109
		0.8423	1850	34	1816	68	1884	0.0360934	0.0360934		0.9999	560.948	0.0524866	560.895	0.104973	561	0.000187118	0.00131109
		0.8421	1850	35	1815	70	1885	0.0371353	0.0365344		0.9999	561.947	0.0531546	561.894	0.106309	562	0.000189162	0.00131109
		0.8417	1851	35	1816	70	1886	0.0371156	0.0365344		0.9999	562.946	0.0538289	562.892	0.107658	563	0.000191222	0.00131109
		0.8416	1853	35	1818	70	1888	0.0370763	0.0365344		0.9999	563.945	0.0545095	563.891	0.109019	564	0.000193296	0.00131109
		0.8415	1855	35	1820	70	1890	0.037037	0.0365344		0.9999	564.945	0.0551965	564.89	0.110393	565	0.000195386	0.00131109
		0.841	1856	35	1821	70	1891	0.0370175	0.0365344		0.9999	565.944	0.0558898	565.888	0.11178	566	0.000197491	0.00131109
		0.8402	1857	35	1822	70	1892	0.0369979	0.0365344		0.9999	566.943	0.0565896	566.887	0.113179	567	0.000199611	0.00131109
		0.84	1858	35	1823	70	1893	0.0369783	0.0365344		0.9999	567.943	0.0572959	567.885	0.114592	568	0.000201746	0.00131109
		0.8395	1859	35	1824	70	1894	0.0369588	0.0365344		0.9999	568.942	0.0580086	568.884	0.116017	569	0.000203897	0.00131109
		0.8394	1860	35	1825	70	1895	0.0369393	0.0365344		0.9999	569.941	0.0587279	569.883	0.117456	570	0.000206063	0.00131109
		0.8392	1861	35	1826	70	1896	0.0369198	0.0365344		0.9999	570.941	0.0594538	570.881	0.118908	571	0.000208244	0.00131109
		0.8384	1862	35	1827	70	1897	0.0369004	0.0365344		0.9999	571.94	0.0601862	571.88	0.120372	572	0.000210441	0.00131109
		0.8382	1863	35	1828	70	1898	0.0368809	0.0365344		0.9999	572.939	0.0609254	572.878	0.121851	573	0.000212654	0.00131109
		0.837	1866	35	1831	70	1901	0.0368227	0.0365344		0.9999	573.938	0.0616711	573.877	0.123342	574	0.000214882	0.00131109
		0.836	1867	35	1832	70	1902	0.0368034	0.0365344		0.9999	574.938	0.0624237	574.875	0.124847	575	0.000217126	0.00131109
		0.8358	1868	35	1833	70	1903	0.036784	0.0365344		0.9999	575.937	0.0631829	575.874	0.126366	576	0.000219385	0.00131109
		0.8353	1869	35	1834	70	1904	0.0367647	0.0365344		0.9999	576.936	0.063949	576.872	0.127898	577	0.00022166	0.00131109
		0.8351	1870	35	1835	70	1905	0.0367454	0.0365344		0.9999	577.935	0.0647218	577.871	0.129444	578	0.000223951	0.00131109
		0.8349	1871	35	1836	70	1906	0.0367261	0.0365344		0.9999	578.934	0.0655016	578.869	0.131003	579	0.000226258	0.00131109
		0.8348	1872	35	1837	70	1907	0.0367069	0.0365344		0.9999	579.934	0.0662882	579.867	0.132576	580	0.00022858	0.00131109
		0.8343	1873	35	1838	70	1908	0.0366876	0.0365344		0.9999	580.933	0.0670817	580.866	0.134163	581	0.000230918	0.00131109
		0.8341	1874	35	1839	70	1909	0.0366684	0.0365344		0.9999	581.932	0.0678823	581.864	0.135765	582	0.000233272	0.00131109
		0.834	1875	35	1840	70	1910	0.0366492	0.0365344		0.9999	582.931	0.0686898	582.863	0.13738	583	0.000235643	0.00131109
		0.8318	1877	35	1842	70	1912	0.0366109	0.0365344		0.9999	583.93	0.0695044	583.861	0.139009	584	0.000238029	0.00131109
		0.8315	1878	35	1843	70	1913	0.0365917	0.0365344		0.9999	584.93	0.070326	584.859	0.140652	585	0.000240431	0.00131109
		0.8305	1879	35	1844	70	1914	0.0365726	0.0365344		0.9999	585.929	0.0711548	585.858	0.14231	586	0.000242849	0.00131109
		0.8301	1880	35	1845	70	1915	0.0365535	0.0365344		0.9999	586.928	0.0719907	586.856	0.143981	587	0.000245283	0.00131109
		0.8294	1881	35	1846	70	1916	0.0365344	0.0365344		0.9999	587.927	0.0728338	587.854	0.145668	588	0.000247734	0.00131109
		0.8291	1883	36	1847	72	1919	0.0375195	0.0371709		0.9999	588.926	0.0736841	588.853	0.147368	589	0.000250201	0.00131109
		0.8288	1884	36	1848	72	1920	0.0375	0.0371709		0.9999	589.925	0.0745417	589.851	0.149083	590	0.000252684	0.00131109
		0.8285	1885	36	1849	72	1921	0.0374805	0.0371709		0.9999	590.925	0.0754066	590.849	0.150813	591	0.000255183	0.00131109
		0.8284	1886	36	1850	72	1922	0.037461	0.0371709		0.9999	591.924	0.0762788	591.847	0.152558	592	0.000257699	0.00131109
		0.8281	1887	36	1851	72	1923	0.0374415	0.0371709		0.9999	592.923	0.0771584	592.846	0.154317	593	0.000260231	0.00131109
		0.828	1888	36	1852	72	1924	0.037422	0.0371709		0.9999	593.922	0.0780453	593.844	0.156091	594	0.000262779	0.00131109
		0.8276	1890	36	1854	72	1926	0.0373832	0.0371709		0.9999	594.921	0.0789398	594.842	0.15788	595	0.000265344	0.00131109
		0.8275	1891	36	1855	72	1927	0.0373638	0.0371709		0.9999	595.92	0.0798417	595.84	0.159683	596	0.000267925	0.00131109
		0.8268	1893	36	1857	72	1929	0.037325	0.0371709		0.9999	596.919	0.0807511	596.838	0.161502	597	0.000270523	0.00131109
		0.8265	1894	36	1858	72	1930	0.0373057	0.0371709		0.9999	597.918	0.081668	597.837	0.163336	598	0.000273137	0.00131109
		0.8262	1895	36	1859	72	1931	0.0372864	0.0371709		0.9999	598.917	0.0825926	598.835	0.165185	599	0.000275768	0.00131109
		0.8261	1896	36	1860	72	1932	0.0372671	0.0371709		0.9999	599.916	0.0835248	599.833	0.16705	600	0.000278416	0.00131109
		0.8254	1897	36	1861	72	1933	0.0372478	0.0371709		0.9999	600.916	0.0844646	600.831	0.168929	601	0.00028108	0.00131109
		0.8251	1898	36	1862	72	1934	0.0372285	0.0371709		0.9999	601.915	0.0854122	601.829	0.170824	602	0.000283761	0.00131109
		0.8246	1899	36	1863	72	1935	0.0372093	0.0371709		0.9999	602.914	0.0863674	602.827	0.172735	603	0.000286459	0.00131109
		0.8243	1900	36	1864	72	1936	0.0371901	0.0371709		0.9999	603.913	0.0873305	603.825	0.174661	604	0.000289174	0.00131109
		0.8242	1901	36	1865	72	1937	0.0371709	0.0371709		0.9999	604.912	0.0883013	604.823	0.176603	605	0.000291905	0.00131109
		0.8241	1901	37	1864	74	1938	0.0381837	0.0378904		0.9999	605.911	0.08928	605.821	0.17856	606	0.000294654	0.00131109
		0.8221	1902	37	1865	74	1939	0.038164	0.0378904		0.9999	606.91	0.0902666	606.819	0.180533	607	0.000297419	0.00131109
		0.8217	1903	37	1866	74	1940	0.0381443	0.0378904		0.9998	607.909	0.0912611	607.817	0.182522	608	0.000300201	0.00246227
		0.8215	1904	37	1867	74	1941	0.0381247	0.0378904		0.9998	608.908	0.0922635	608.815	0.184527	609	0.000303	0.00246227
		0.8212	1905	37	1868	74	1942	0.038105	0.0378904		0.9998	609.907	0.093274	609.813	0.186548	610	0.000305816	0.00246227
		0.8211	1906	37	1869	74	1943	0.0380854	0.0378904		0.9998	610.906	0.0942924	610.811	0.188585	611	0.00030865	0.00246227
		0.8208	1907	37	1870	74	1944	0.0380658	0.0378904		0.9998	611.905	0.095319	611.809	0.190638	612	0.0003115	0.00246227
		0.82	1908	37	1871	74	1945	0.0380463	0.0378904		0.9998	612.904	0.0963536	612.807	0.192707	613	0.000314367	0.00246227
		0.819	1909	37	1872	74	1946	0.0380267	0.0378904		0.9998	613.903	0.0973964	613.805	0.194793	614	0.000317252	0.00246227
		0.8183	1910	37	1873	74	1947	0.0380072	0.0378904		0.9998	614.902	0.0984473	614.803	0.196895	615	0.000320154	0.00246227
		0.8176	1911	37	1874	74	1948	0.0379877	0.0378904		0.9998	615.9	0.0995064	615.801	0.199013	616	0.000323073	0.00246227
		0.8168	1912	37	1875	74	1949	0.0379682	0.0378904		0.9998	616.899	0.100574	616.799	0.201148	617	0.000326009	0.00246227
		0.8164	1913	37	1876	74	1950	0.0379487	0.0378904		0.9998	617.898	0.10165	617.797	0.203299	618	0.000328963	0.00246227
		0.8163	1914	37	1877	74	1951	0.0379293	0.0378904		0.9998	618.897	0.102734	618.795	0.205467	619	0.000331934	0.00246227
		0.8159	1915	37	1878	74	1952	0.0379098	0.0378904		0.9998	619.896	0.103826	619.792	0.207652	620	0.000334922	0.00246227
		0.8148	1916	37	1879	74	1953	0.0378904	0.0378904		0.9998	620.895	0.104927	620.79	0.209853	621	0.000337928	0.00246227
		0.8145	1916	38	1878	76	1954	0.0388946	0.0387163		0.9998	621.894	0.106036	621.788	0.212072	622	0.000340951	0.00246227
		0.814	1917	38	1879	76	1955	0.0388747	0.0387163		0.9998	622.893	0.107154	622.786	0.214307	623	0.000343992	0.00246227
		0.8127	1918	38	1880	76	1956	0.0388548	0.0387163		0.9998	623.892	0.10828	623.783	0.216559	624	0.00034705	0.00246227
		0.8125	1919	38	1881	76	1957	0.038835	0.0387163		0.9998	624.891	0.109414	624.781	0.218829	625	0.000350126	0.00246227
		0.8115	1920	38	1882	76	1958	0.0388151	0.0387163		0.9998	625.889	0.110558	625.779	0.221115	626	0.00035322	0.00246227
		0.8114	1921	38	1883	76	1959	0.0387953	0.0387163		0.9998	626.888	0.11171	626.777	0.223419	627	0.000356331	0.00246227
		0.8105	1922	38	1884	76	1960	0.0387755	0.0387163		0.9998	627.887	0.11287	627.774	0.22574	628	0.000359459	0.00246227
		0.8103	1924	38	1886	76	1962	0.038736	0.0387163		0.9998	628.886	0.114039	628.772	0.228079	629	0.000362606	0.00246227
		0.8083	1925	38	1887	76	1963	0.0387163	0.0387163		0.9998	629.885	0.115217	629.77	0.230435	630	0.00036577	0.00246227
		0.8081	1925	39	1886	78	1964	0.0397149	0.0393939		0.9998	630.884	0.116404	630.767	0.232808	631	0.000368952	0.00246227
		0.8075	1927	39	1888	78	1966	0.0396745	0.0393939		0.9998	631.882	0.1176	631.765	0.2352	632	0.000372151	0.00246227
		0.8072	1928	39	1889	78	1967	0.0396543	0.0393939		0.9998	632.881	0.118804	632.762	0.237608	633	0.000375369	0.00246227
		0.8069	1929	39	1890	78	1968	0.0396341	0.0393939		0.9998	633.88	0.120017	633.76	0.240035	634	0.000378604	0.00246227
		0.8068	1930	39	1891	78	1969	0.039614	0.0393939		0.9998	634.879	0.12124	634.758	0.242479	635	0.000381857	0.00246227
		0.8057	1931	39	1892	78	1970	0.0395939	0.0393939		0.9998	635.878	0.122471	635.755	0.244942	636	0.000385128	0.00246227
		0.8046	1932	39	1893	78	1971	0.0395738	0.0393939		0.9998	636.876	0.123711	636.753	0.247422	637	0.000388417	0.00246227
		0.8044	1933	39	1894	78	1972	0.0395538	0.0393939		0.9998	637.875	0.12496	637.75	0.24992	638	0.000391724	0.00246227
		0.8043	1934	39	1895	78	1973	0.0395337	0.0393939		0.9998	638.874	0.126218	638.748	0.252437	639	0.000395049	0.00246227
		0.8042	1935	39	1896	78	1974	0.0395137	0.0393939		0.9998	639.873	0.127486	639.745	0.254971	640	0.000398392	0.00246227
		0.8033	1936	39	1897	78	1975	0.0394937	0.0393939		0.9998	640.871	0.128762	640.742	0.257524	641	0.000401754	0.00246227
		0.8025	1939	39	1900	78	1978	0.0394338	0.0393939		0.9998	641.87	0.130048	641.74	0.260095	642	0.000405133	0.00246227
		0.8014	1940	39	1901	78	1979	0.0394138	0.0393939		0.9998	642.869	0.131342	642.737	0.262685	643	0.00040853	0.00246227
		0.8007	1941	39	1902	78	1980	0.0393939	0.0393939		0.9998	643.867	0.132647	643.735	0.265293	644	0.000411946	0.00246227
		0.8006	1941	40	1901	80	1981	0.0403836	0.0403836		0.9998	644.866	0.13396	644.732	0.26792	645	0.000415379	0.00246227
		0.8004	1941	41	1900	82	1982	0.0413724	0.0413724		0.9998	645.865	0.135283	645.729	0.270565	646	0.000418831	0.00246227
		0.7997	1941	42	1899	84	1983	0.0423601	0.0420842		0.9998	646.863	0.136615	646.727	0.273229	647	0.000422302	0.00246227
		0.7988	1942	42	1900	84	1984	0.0423387	0.0420842		0.9998	647.862	0.137956	647.724	0.275912	648	0.00042579	0.00246227
		0.7973	1943	42	1901	84	1985	0.0423174	0.0420842		0.9998	648.861	0.139307	648.721	0.278614	649	0.000429297	0.00246227
		0.7971	1944	42	1902	84	1986	0.0422961	0.0420842		0.9998	649.859	0.140667	649.719	0.281334	650	0.000432822	0.00246227
		0.797	1945	42	1903	84	1987	0.0422748	0.0420842		0.9998	650.858	0.142037	650.716	0.284074	651	0.000436366	0.00246227
		0.796	1946	42	1904	84	1988	0.0422535	0.0420842		0.9998	651.857	0.143416	651.713	0.286833	652	0.000439928	0.00246227
		0.7935	1947	42	1905	84	1989	0.0422323	0.0420842		0.9998	652.855	0.144805	652.71	0.289611	653	0.000443508	0.00246227
		0.7929	1948	42	1906	84	1990	0.0422111	0.0420842		0.9998	653.854	0.146204	653.708	0.292408	654	0.000447107	0.00246227
		0.7922	1949	42	1907	84	1991	0.0421899	0.0420842		0.9998	654.852	0.147612	654.705	0.295224	655	0.000450724	0.00246227
		0.7911	1951	42	1909	84	1993	0.0421475	0.0420842		0.9998	655.851	0.14903	655.702	0.29806	656	0.00045436	0.00246227
		0.791	1952	42	1910	84	1994	0.0421264	0.0420842		0.9998	656.85	0.150458	656.699	0.300915	657	0.000458014	0.00246227
		0.7908	1953	42	1911	84	1995	0.0421053	0.0420842		0.9998	657.848	0.151895	657.696	0.30379	658	0.000461687	0.00246227
		0.7901	1954	42	1912	84	1996	0.0420842	0.0420842		0.9998	658.847	0.153342	658.693	0.306685	659	0.000465379	0.00246227
		0.7899	1954	43	1911	86	1997	0.0430646	0.0430646		0.9998	659.845	0.154799	659.69	0.309599	660	0.000469089	0.00246227
		0.7886	1954	44	1910	88	1998	0.044044	0.044		0.9998	660.844	0.156266	660.687	0.312533	661	0.000472818	0.00246227
		0.7873	1955	44	1911	88	1999	0.044022	0.044		0.9998	661.842	0.157743	661.685	0.315486	662	0.000476565	0.00246227
		0.7872	1956	44	1912	88	2000	0.044	0.044		0.9998	662.841	0.15923	662.682	0.31846	663	0.000480332	0.00246227
		0.7868	1957	45	1912	90	2002	0.044955	0.0448654		0.9998	663.839	0.160727	663.679	0.321453	664	0.000484117	0.00246227
		0.7862	1959	45	1914	90	2004	0.0449102	0.0448654		0.9997	664.838	0.162234	664.676	0.324467	665	0.00048792	0.00313549
		0.786	1960	45	1915	90	2005	0.0448878	0.0448654		0.9997	665.836	0.16375	665.672	0.327501	666	0.000491743	0.00313549
		0.7855	1961	45	1916	90	2006	0.0448654	0.0448654		0.9997	666.835	0.165277	666.669	0.330555	667	0.000495584	0.00313549
		0.7848	1961	46	1915	92	2007	0.0458396	0.0456123		0.9997	667.833	0.166815	667.666	0.333629	668	0.000499445	0.00313549
		0.7841	1962	46	1916	92	2008	0.0458167	0.0456123		0.9997	668.832	0.168362	668.663	0.336724	669	0.000503324	0.00313549
		0.7823	1963	46	1917	92	2009	0.0457939	0.0456123		0.9997	669.83	0.169919	669.66	0.339839	670	0.000507222	0.00313549
		0.7815	1965	46	1919	92	2011	0.0457484	0.0456123		0.9997	670.829	0.171487	670.657	0.342974	671	0.000511139	0.00313549
		0.7814	1966	46	1920	92	2012	0.0457256	0.0456123		0.9997	671.827	0.173065	671.654	0.34613	672	0.000515075	0.00313549
		0.7798	1967	46	1921	92	2013	0.0457029	0.0456123		0.9997	672.825	0.174653	672.651	0.349307	673	0.00051903	0.00313549
		0.7773	1968	46	1922	92	2014	0.0456802	0.0456123		0.9997	673.824	0.176252	673.647	0.352504	674	0.000523003	0.00313549
		0.7761	1969	46	1923	92	2015	0.0456576	0.0456123		0.9997	674.822	0.177861	674.644	0.355723	675	0.000526996	0.00313549
		0.7759	1970	46	1924	92	2016	0.0456349	0.0456123		0.9997	675.821	0.179481	675.641	0.358962	676	0.000531008	0.00313549
		0.7758	1971	46	1925	92	2017	0.0456123	0.0456123		0.9997	676.819	0.181111	676.638	0.362222	677	0.000535039	0.00313549
		0.775	1971	47	1924	94	2018	0.0465808	0.0463282		0.9996	677.817	0.182751	677.634	0.365503	678	0.00053909	0.00401652
		0.7743	1972	47	1925	94	2019	0.0465577	0.0463282		0.9996	678.816	0.184402	678.631	0.368805	679	0.000543159	0.00401652
		0.774	1973	47	1926	94	2020	0.0465347	0.0463282		0.9996	679.814	0.186064	679.628	0.372128	680	0.000547247	0.00401652
		0.7731	1976	47	1929	94	2023	0.0464656	0.0463282		0.9996	680.812	0.187736	680.625	0.375473	681	0.000551355	0.00401652
		0.7729	1977	47	1930	94	2024	0.0464427	0.0463282		0.9996	681.811	0.189419	681.621	0.378839	682	0.000555482	0.00401652
		0.7715	1978	47	1931	94	2025	0.0464198	0.0463282		0.9996	682.809	0.191113	682.618	0.382226	683	0.000559628	0.00401652
		0.7713	1979	47	1932	94	2026	0.0463968	0.0463282		0.9996	683.807	0.192817	683.614	0.385635	684	0.000563793	0.00401652
		0.7707	1980	47	1933	94	2027	0.046374	0.0463282		0.9996	684.805	0.194532	684.611	0.389065	685	0.000567978	0.00401652
		0.7702	1981	47	1934	94	2028	0.0463511	0.0463282		0.9996	685.804	0.196258	685.607	0.392517	686	0.000572182	0.00401652
		0.7685	1982	47	1935	94	2029	0.0463282	0.0463282		0.9996	686.802	0.197995	686.604	0.39599	687	0.000576405	0.00401652
		0.7675	1982	48	1934	96	2030	0.0472906	0.046875		0.9996	687.8	0.199743	687.601	0.399486	688	0.000580648	0.00401652
		0.7674	1983	48	1935	96	2031	0.0472674	0.046875		0.9996	688.798	0.201501	688.597	0.403003	689	0.00058491	0.00401652
		0.7657	1984	48	1936	96	2032	0.0472441	0.046875		0.9996	689.797	0.203271	689.593	0.406542	690	0.000589191	0.00401652
		0.7655	1985	48	1937	96	2033	0.0472209	0.046875		0.9996	690.795	0.205052	690.59	0.410103	691	0.000593492	0.00401652
		0.765	1986	48	1938	96	2034	0.0471976	0.046875		0.9996	691.793	0.206843	691.586	0.413686	692	0.000597813	0.00401652
		0.7646	1987	48	1939	96	2035	0.0471744	0.046875		0.9996	692.791	0.208646	692.583	0.417292	693	0.000602152	0.00401652
		0.7642	1988	48	1940	96	2036	0.0471513	0.046875		0.9996	693.79	0.21046	693.579	0.420919	694	0.000606512	0.00401652
		0.7636	1989	48	1941	96	2037	0.0471281	0.046875		0.9996	694.788	0.212284	694.575	0.424569	695	0.00061089	0.00401652
		0.7628	1991	48	1943	96	2039	0.0470819	0.046875		0.9996	695.786	0.21412	695.572	0.428241	696	0.000615289	0.00401652
		0.7618	1992	48	1944	96	2040	0.0470588	0.046875		0.9996	696.784	0.215968	696.568	0.431936	697	0.000619707	0.00401652
		0.7616	1993	48	1945	96	2041	0.0470358	0.046875		0.9996	697.782	0.217826	697.564	0.435653	698	0.000624144	0.00401652
		0.7608	1994	48	1946	96	2042	0.0470127	0.046875		0.9996	698.78	0.219696	698.561	0.439392	699	0.000628601	0.00401652
		0.7601	1995	48	1947	96	2043	0.0469897	0.046875		0.9996	699.778	0.221577	699.557	0.443155	700	0.000633078	0.00401652
		0.7598	1996	48	1948	96	2044	0.0469667	0.046875		0.9996	700.777	0.22347	700.553	0.44694	701	0.000637574	0.00401652
		0.7597	1998	48	1950	96	2046	0.0469208	0.046875		0.9996	701.775	0.225374	701.549	0.450748	702	0.000642091	0.00401652
		0.7588	1999	48	1951	96	2047	0.0468979	0.046875		0.9996	702.773	0.227289	702.545	0.454578	703	0.000646626	0.00401652
		0.7583	2000	48	1952	96	2048	0.046875	0.046875		0.9996	703.771	0.229216	703.542	0.458432	704	0.000651182	0.00401652
		0.7578	2000	49	1951	98	2049	0.0478282	0.0474576		0.9996	704.769	0.231154	704.538	0.462309	705	0.000655757	0.00401652
		0.7576	2001	49	1952	98	2050	0.0478049	0.0474576		0.9996	705.767	0.233104	705.534	0.466209	706	0.000660352	0.00401652
		0.7551	2002	49	1953	98	2051	0.0477816	0.0474576		0.9996	706.765	0.235066	706.53	0.470132	707	0.000664967	0.00401652
		0.7548	2003	49	1954	98	2052	0.0477583	0.0474576		0.9996	707.763	0.237039	707.526	0.474078	708	0.000669602	0.00401652
		0.7546	2004	49	1955	98	2053	0.047735	0.0474576		0.9996	708.761	0.239024	708.522	0.478048	709	0.000674256	0.00401652
		0.7544	2005	49	1956	98	2054	0.0477118	0.0474576		0.9996	709.759	0.24102	709.518	0.482041	710	0.00067893	0.00401652
		0.7539	2006	49	1957	98	2055	0.0476886	0.0474576		0.9996	710.757	0.243029	710.514	0.486057	711	0.000683625	0.00401652
		0.7536	2007	49	1958	98	2056	0.0476654	0.0474576		0.9996	711.755	0.245049	711.51	0.490097	712	0.000688339	0.00401652
		0.7534	2008	49	1959	98	2057	0.0476422	0.0474576		0.9996	712.753	0.24708	712.506	0.494161	713	0.000693073	0.00401652
		0.7533	2009	49	1960	98	2058	0.047619	0.0474576		0.9996	713.751	0.249124	713.502	0.498248	714	0.000697827	0.00401652
		0.7529	2010	49	1961	98	2059	0.0475959	0.0474576		0.9996	714.749	0.25118	714.498	0.50236	715	0.000702601	0.00401652
		0.7519	2011	49	1962	98	2060	0.0475728	0.0474576		0.9996	715.747	0.253247	715.494	0.506495	716	0.000707395	0.00401652
		0.7499	2013	49	1964	98	2062	0.0475267	0.0474576		0.9996	716.745	0.255327	716.489	0.510654	717	0.000712209	0.00401652
		0.7493	2014	49	1965	98	2063	0.0475036	0.0474576		0.9996	717.743	0.257418	717.485	0.514837	718	0.000717043	0.00401652
		0.7491	2015	49	1966	98	2064	0.0474806	0.0474576		0.9996	718.74	0.259522	718.481	0.519044	719	0.000721897	0.00401652
		0.747	2016	49	1967	98	2065	0.0474576	0.0474576		0.9996	719.738	0.261637	719.477	0.523275	720	0.000726771	0.00401652
		0.7459	2017	50	1967	100	2067	0.0483793	0.0482393		0.9996	720.736	0.263765	720.472	0.52753	721	0.000731665	0.00401652
		0.7444	2018	50	1968	100	2068	0.0483559	0.0482393		0.9996	721.734	0.265905	721.468	0.53181	722	0.000736579	0.00401652
		0.7442	2019	50	1969	100	2069	0.0483325	0.0482393		0.9996	722.732	0.268057	722.464	0.536114	723	0.000741514	0.00401652
		0.7439	2020	50	1970	100	2070	0.0483092	0.0482393		0.9996	723.73	0.270221	723.46	0.540443	724	0.000746468	0.00401652
		0.7435	2021	50	1971	100	2071	0.0482859	0.0482393		0.9996	724.728	0.272398	724.455	0.544796	725	0.000751443	0.00401652
		0.7423	2022	50	1972	100	2072	0.0482625	0.0482393		0.9996	725.725	0.274587	725.451	0.549174	726	0.000756438	0.00401652
		0.7421	2023	50	1973	100	2073	0.0482393	0.0482393		0.9996	726.723	0.276788	726.446	0.553576	727	0.000761453	0.00401652
		0.7418	2023	51	1972	102	2074	0.0491803	0.0491093		0.9996	727.721	0.279002	727.442	0.558003	728	0.000766488	0.00401652
		0.7417	2024	51	1973	102	2075	0.0491566	0.0491093		0.9996	728.719	0.281228	728.438	0.562455	729	0.000771544	0.00401652
		0.7415	2026	51	1975	102	2077	0.0491093	0.0491093		0.9996	729.717	0.283466	729.433	0.566932	730	0.00077662	0.00401652
		0.7409	2026	52	1974	104	2078	0.0500481	0.049952		0.9996	730.714	0.285717	730.429	0.571434	731	0.000781716	0.00401652
		0.7403	2027	52	1975	104	2079	0.0500241	0.049952		0.9996	731.712	0.287981	731.424	0.575961	732	0.000786832	0.00401652
		0.7402	2028	52	1976	104	2080	0.05	0.049952		0.9996	732.71	0.290257	732.419	0.580513	733	0.000791969	0.00401652
		0.7389	2029	52	1977	104	2081	0.049976	0.049952		0.9996	733.707	0.292545	733.415	0.585091	734	0.000797126	0.00401652
		0.7378	2030	52	1978	104	2082	0.049952	0.049952		0.9996	734.705	0.294847	734.41	0.589693	735	0.000802304	0.00401652
		0.7377	2030	53	1977	106	2083	0.0508881	0.0508393		0.9996	735.703	0.297161	735.406	0.594321	736	0.000807502	0.00401652
		0.7363	2031	53	1978	106	2084	0.0508637	0.0508393		0.9996	736.701	0.299487	736.401	0.598975	737	0.00081272	0.00401652
		0.7361	2032	53	1979	106	2085	0.0508393	0.0508393		0.9996	737.698	0.301827	737.396	0.603654	738	0.000817959	0.00401652
		0.7351	2032	54	1978	108	2086	0.0517737	0.0516499		0.9996	738.696	0.304179	738.392	0.608358	739	0.000823218	0.00401652
		0.7338	2033	54	1979	108	2087	0.0517489	0.0516499		0.9996	739.693	0.306544	739.387	0.613088	740	0.000828498	0.00401652
		0.7337	2034	54	1980	108	2088	0.0517241	0.0516499		0.9996	740.691	0.308922	740.382	0.617844	741	0.000833798	0.00401652
		0.7323	2035	54	1981	108	2089	0.0516994	0.0516499		0.9996	741.689	0.311313	741.377	0.622626	742	0.000839118	0.00401652
		0.7318	2037	54	1983	108	2091	0.0516499	0.0516499		0.9996	742.686	0.313717	742.373	0.627433	743	0.00084446	0.00401652
		0.73	2037	55	1982	110	2092	0.0525813	0.052531		0.9996	743.684	0.316134	743.368	0.632267	744	0.000849821	0.00401652
		0.7288	2038	55	1983	110	2093	0.0525561	0.052531		0.9995	744.681	0.318563	744.363	0.637127	745	0.000855204	0.00492505
		0.7286	2039	55	1984	110	2094	0.052531	0.052531		0.9995	745.679	0.321006	745.358	0.642012	746	0.000860606	0.00492505
		0.7284	2040	56	1984	112	2096	0.0534351	0.0534096		0.9995	746.677	0.323462	746.353	0.646924	747	0.00086603	0.00492505
		0.7282	2041	56	1985	112	2097	0.0534096	0.0534096		0.9995	747.674	0.325931	747.348	0.651863	748	0.000871474	0.00492505
		0.7262	2041	58	1983	116	2099	0.0552644	0.0549763		0.9995	748.672	0.328414	748.343	0.656827	749	0.000876939	0.00492505
		0.7258	2042	58	1984	116	2100	0.0552381	0.0549763		0.9995	749.669	0.330909	749.338	0.661818	750	0.000882424	0.00492505
		0.7253	2043	58	1985	116	2101	0.0552118	0.0549763		0.9994	750.667	0.333418	750.333	0.666836	751	0.00088793	0.00553536
		0.7225	2044	58	1986	116	2102	0.0551855	0.0549763		0.9994	751.664	0.33594	751.328	0.67188	752	0.000893457	0.00553536
		0.7223	2045	58	1987	116	2103	0.0551593	0.0549763		0.9994	752.662	0.338475	752.323	0.67695	753	0.000899004	0.00553536
		0.7203	2047	58	1989	116	2105	0.0551069	0.0549763		0.9994	753.659	0.341024	753.318	0.682048	754	0.000904572	0.00553536
		0.7202	2048	58	1990	116	2106	0.0550807	0.0549763		0.9994	754.656	0.343586	754.313	0.687172	755	0.000910161	0.00553536
		0.7194	2049	58	1991	116	2107	0.0550546	0.0549763		0.9994	755.654	0.346161	755.308	0.692323	756	0.000915771	0.00553536
		0.7193	2050	58	1992	116	2108	0.0550285	0.0549763		0.9994	756.651	0.34875	756.302	0.697501	757	0.000921401	0.00553536
		0.7187	2051	58	1993	116	2109	0.0550024	0.0549763		0.9994	757.649	0.351353	757.297	0.702706	758	0.000927053	0.00553536
		0.7178	2052	58	1994	116	2110	0.0549763	0.0549763		0.9994	758.646	0.353969	758.292	0.707938	759	0.000932725	0.00553536
		0.7175	2052	59	1993	118	2111	0.0558977	0.0558448		0.9994	759.643	0.356599	759.287	0.713197	760	0.000938418	0.00553536
		0.717	2054	59	1995	118	2113	0.0558448	0.0558448		0.9994	760.641	0.359242	760.282	0.718484	761	0.000944132	0.00553536
		0.7167	2054	60	1994	120	2114	0.0567644	0.056338		0.9994	761.638	0.361899	761.276	0.723798	762	0.000949866	0.00553536
		0.7163	2056	60	1996	120	2116	0.0567108	0.056338		0.9994	762.635	0.36457	762.271	0.729139	763	0.000955622	0.00553536
		0.7161	2057	60	1997	120	2117	0.056684	0.056338		0.9994	763.633	0.367254	763.265	0.734508	764	0.000961398	0.00553536
		0.716	2058	60	1998	120	2118	0.0566572	0.056338		0.9994	764.63	0.369952	764.26	0.739905	765	0.000967196	0.00553536
		0.7142	2059	60	1999	120	2119	0.0566305	0.056338		0.9994	765.627	0.372664	765.255	0.745329	766	0.000973014	0.00553536
		0.7128	2060	60	2000	120	2120	0.0566038	0.056338		0.9994	766.625	0.37539	766.249	0.75078	767	0.000978853	0.00553536
		0.7119	2061	60	2001	120	2121	0.0565771	0.056338		0.9994	767.622	0.37813	767.244	0.75626	768	0.000984713	0.00553536
		0.7112	2062	60	2002	120	2122	0.0565504	0.056338		0.9994	768.619	0.380884	768.238	0.761767	769	0.000990595	0.00553536
		0.7102	2063	60	2003	120	2123	0.0565238	0.056338		0.9994	769.616	0.383651	769.233	0.767303	770	0.000996497	0.00553536
		0.71	2064	60	2004	120	2124	0.0564972	0.056338		0.9994	770.614	0.386433	770.227	0.772866	771	0.00100242	0.00553536
		0.7095	2066	60	2006	120	2126	0.056444	0.056338		0.9994	771.611	0.389229	771.222	0.778458	772	0.00100836	0.00553536
		0.7086	2067	60	2007	120	2127	0.0564175	0.056338		0.9994	772.608	0.392039	772.216	0.784077	773	0.00101433	0.00553536
		0.7082	2068	60	2008	120	2128	0.056391	0.056338		0.9994	773.605	0.394863	773.21	0.789725	774	0.00102032	0.00553536
		0.7057	2069	60	2009	120	2129	0.0563645	0.056338		0.9994	774.602	0.397701	774.205	0.795401	775	0.00102632	0.00553536
		0.7043	2070	60	2010	120	2130	0.056338	0.056338		0.9994	775.599	0.400553	775.199	0.801106	776	0.00103235	0.00553536
		0.7041	2071	61	2010	122	2132	0.0572233	0.0572233		0.9994	776.597	0.40342	776.193	0.806839	777	0.0010384	0.00553536
		0.7036	2071	62	2009	124	2133	0.0581341	0.0578628		0.9994	777.594	0.4063	777.187	0.812601	778	0.00104447	0.00553536
		0.7031	2072	62	2010	124	2134	0.0581068	0.0578628		0.9994	778.591	0.409196	778.182	0.818391	779	0.00105057	0.00553536
		0.703	2073	62	2011	124	2135	0.0580796	0.0578628		0.9994	779.588	0.412105	779.176	0.82421	780	0.00105668	0.00553536
		0.7021	2074	62	2012	124	2136	0.0580524	0.0578628		0.9994	780.585	0.415029	780.17	0.830058	781	0.00106281	0.00553536
		0.702	2075	62	2013	124	2137	0.0580253	0.0578628		0.9994	781.582	0.417967	781.164	0.835935	782	0.00106897	0.00553536
		0.701	2076	62	2014	124	2138	0.0579981	0.0578628		0.9994	782.579	0.42092	782.158	0.841841	783	0.00107515	0.00553536
		0.7006	2077	62	2015	124	2139	0.057971	0.0578628		0.9994	783.576	0.423888	783.152	0.847775	784	0.00108135	0.00553536
		0.7	2079	62	2017	124	2141	0.0579169	0.0578628		0.9994	784.573	0.42687	784.146	0.853739	785	0.00108757	0.00553536
		0.698	2080	62	2018	124	2142	0.0578898	0.0578628		0.9994	785.57	0.429866	785.14	0.859732	786	0.00109381	0.00553536
		0.6965	2081	62	2019	124	2143	0.0578628	0.0578628		0.9994	786.567	0.432877	786.134	0.865754	787	0.00110007	0.00553536
		0.6959	2081	63	2018	126	2144	0.0587687	0.0583874		0.9994	787.564	0.435903	787.128	0.871806	788	0.00110635	0.00553536
		0.6958	2082	63	2019	126	2145	0.0587413	0.0583874		0.9994	788.561	0.438943	788.122	0.877887	789	0.00111266	0.00553536
		0.6957	2083	63	2020	126	2146	0.0587139	0.0583874		0.9993	789.558	0.441999	789.116	0.883997	790	0.00111898	0.00614005
		0.6951	2084	63	2021	126	2147	0.0586865	0.0583874		0.9993	790.555	0.445069	790.11	0.890137	791	0.00112533	0.00614005
		0.6943	2085	63	2022	126	2148	0.0586592	0.0583874		0.9993	791.552	0.448154	791.104	0.896307	792	0.0011317	0.00614005
		0.6941	2086	63	2023	126	2149	0.0586319	0.0583874		0.9992	792.549	0.451253	792.097	0.902507	793	0.00113809	0.00628907
		0.6939	2088	63	2025	126	2151	0.0585774	0.0583874		0.9992	793.546	0.454368	793.091	0.908736	794	0.0011445	0.00628907
		0.692	2089	63	2026	126	2152	0.0585502	0.0583874		0.9992	794.543	0.457497	794.085	0.914995	795	0.00115094	0.00628907
		0.6919	2090	63	2027	126	2153	0.058523	0.0583874		0.9992	795.539	0.460642	795.079	0.921284	796	0.00115739	0.00628907
		0.6918	2091	63	2028	126	2154	0.0584958	0.0583874		0.9992	796.536	0.463802	796.072	0.927603	797	0.00116387	0.00628907
		0.6915	2092	63	2029	126	2155	0.0584687	0.0583874		0.9992	797.533	0.466976	797.066	0.933952	798	0.00117037	0.00628907
		0.6914	2093	63	2030	126	2156	0.0584416	0.0583874		0.9992	798.53	0.470166	798.06	0.940332	799	0.00117689	0.00628907
		0.6898	2094	63	2031	126	2157	0.0584145	0.0583874		0.9991	799.527	0.473371	799.053	0.946741	800	0.00118343	0.00651627
		0.6895	2095	63	2032	126	2158	0.0583874	0.0583874		0.9991	800.523	0.476591	800.047	0.953181	801	0.00118999	0.00651627
		0.6891	2095	64	2031	128	2159	0.0592867	0.0592867		0.9991	801.52	0.479826	801.04	0.959652	802	0.00119657	0.00651627
		0.689	2095	65	2030	130	2160	0.0601852	0.0601852		0.9991	802.517	0.483076	802.034	0.966153	803	0.00120318	0.00651627
		0.6885	2096	66	2030	132	2162	0.0610546	0.0610546		0.9991	803.514	0.486342	803.027	0.972685	804	0.00120981	0.00651627
		0.6877	2096	67	2029	134	2163	0.061951	0.0616375		0.9991	804.51	0.489623	804.021	0.979247	805	0.00121646	0.00651627
		0.6871	2097	67	2030	134	2164	0.0619224	0.0616375		0.9991	805.507	0.49292	805.014	0.98584	806	0.00122313	0.00651627
		0.6865	2098	67	2031	134	2165	0.0618938	0.0616375		0.9991	806.504	0.496232	806.008	0.992464	807	0.00122982	0.00651627
		0.6864	2099	67	2032	134	2166	0.0618652	0.0616375		0.999	807.5	0.499559	807.001	0.999118	808	0.00123653	0.00832025
		0.6861	2100	67	2033	134	2167	0.0618366	0.0616375		0.999	808.497	0.502902	807.994	1.0058	809	0.00124327	0.00832025
		0.6858	2101	67	2034	134	2168	0.0618081	0.0616375		0.999	809.494	0.50626	808.987	1.01252	810	0.00125003	0.00832025
		0.6836	2102	67	2035	134	2169	0.0617796	0.0616375		0.999	810.49	0.509634	809.981	1.01927	811	0.0012568	0.00832025
		0.6831	2103	67	2036	134	2170	0.0617512	0.0616375		0.999	811.487	0.513024	810.974	1.02605	812	0.00126361	0.00832025
		0.6827	2104	67	2037	134	2171	0.0617227	0.0616375		0.999	812.484	0.516429	811.967	1.03286	813	0.00127043	0.00832025
		0.6811	2105	67	2038	134	2172	0.0616943	0.0616375		0.999	813.48	0.51985	812.96	1.0397	814	0.00127727	0.00832025
		0.6802	2106	67	2039	134	2173	0.0616659	0.0616375		0.999	814.477	0.523287	813.953	1.04657	815	0.00128414	0.00832025
		0.6795	2107	67	2040	134	2174	0.0616375	0.0616375		0.999	815.473	0.526739	814.947	1.05348	816	0.00129103	0.00832025
		0.6788	2107	68	2039	136	2175	0.0625287	0.0619872		0.999	816.47	0.530207	815.94	1.06041	817	0.00129794	0.00832025
		0.6783	2108	68	2040	136	2176	0.0625	0.0619872		0.999	817.466	0.533691	816.933	1.06738	818	0.00130487	0.00832025
		0.6781	2109	68	2041	136	2177	0.0624713	0.0619872		0.999	818.463	0.537191	817.926	1.07438	819	0.00131182	0.00832025
		0.6773	2110	68	2042	136	2178	0.0624426	0.0619872		0.999	819.459	0.540707	818.919	1.08141	820	0.0013188	0.00832025
		0.6767	2111	68	2043	136	2179	0.062414	0.0619872		0.999	820.456	0.544239	819.912	1.08848	821	0.0013258	0.00832025
		0.6764	2112	68	2044	136	2180	0.0623853	0.0619872		0.999	821.452	0.547787	820.904	1.09557	822	0.00133282	0.00832025
		0.6761	2113	68	2045	136	2181	0.0623567	0.0619872		0.999	822.449	0.551351	821.897	1.1027	823	0.00133986	0.00832025
		0.6754	2114	68	2046	136	2182	0.0623281	0.0619872		0.999	823.445	0.554931	822.89	1.10986	824	0.00134692	0.00832025
		0.6753	2115	68	2047	136	2183	0.0622996	0.0619872		0.999	824.441	0.558527	823.883	1.11705	825	0.001354	0.00832025
		0.6746	2116	68	2048	136	2184	0.0622711	0.0619872		0.999	825.438	0.562139	824.876	1.12428	826	0.00136111	0.00832025
		0.6743	2117	68	2049	136	2185	0.0622426	0.0619872		0.999	826.434	0.565768	825.868	1.13154	827	0.00136824	0.00832025
		0.6739	2118	68	2050	136	2186	0.0622141	0.0619872		0.999	827.431	0.569413	826.861	1.13883	828	0.00137539	0.00832025
		0.6732	2119	68	2051	136	2187	0.0621856	0.0619872		0.999	828.427	0.573074	827.854	1.14615	829	0.00138257	0.00832025
		0.6717	2120	68	2052	136	2188	0.0621572	0.0619872		0.999	829.423	0.576751	828.846	1.1535	830	0.00138976	0.00832025
		0.6714	2121	68	2053	136	2189	0.0621288	0.0619872		0.999	830.42	0.580445	829.839	1.16089	831	0.00139698	0.00832025
		0.6713	2122	68	2054	136	2190	0.0621005	0.0619872		0.999	831.416	0.584155	830.832	1.16831	832	0.00140422	0.00832025
		0.6696	2123	68	2055	136	2191	0.0620721	0.0619872		0.999	832.412	0.587882	831.824	1.17576	833	0.00141148	0.00832025
		0.6695	2124	68	2056	136	2192	0.0620438	0.0619872		0.999	833.408	0.591625	832.817	1.18325	834	0.00141876	0.00832025
		0.6672	2126	68	2058	136	2194	0.0619872	0.0619872		0.999	834.405	0.595385	833.809	1.19077	835	0.00142607	0.00832025
		0.6652	2126	69	2057	138	2195	0.0628702	0.0628702		0.999	835.401	0.599161	834.802	1.19832	836	0.0014334	0.00832025
		0.6651	2126	70	2056	140	2196	0.0637523	0.0634633		0.999	836.397	0.602954	835.794	1.20591	837	0.00144075	0.00832025
		0.6649	2127	70	2057	140	2197	0.0637233	0.0634633		0.999	837.393	0.606763	836.786	1.21353	838	0.00144812	0.00832025
		0.6636	2128	70	2058	140	2198	0.0636943	0.0634633		0.999	838.389	0.610589	837.779	1.22118	839	0.00145552	0.00832025
		0.6635	2129	70	2059	140	2199	0.0636653	0.0634633		0.999	839.386	0.614432	838.771	1.22886	840	0.00146293	0.00832025
		0.663	2130	70	2060	140	2200	0.0636364	0.0634633		0.999	840.382	0.618292	839.763	1.23658	841	0.00147037	0.00832025
		0.6628	2132	70	2062	140	2202	0.0635786	0.0634633		0.999	841.378	0.622169	840.756	1.24434	842	0.00147784	0.00832025
		0.6627	2134	70	2064	140	2204	0.0635209	0.0634633		0.999	842.374	0.626062	841.748	1.25212	843	0.00148532	0.00832025
		0.6618	2135	70	2065	140	2205	0.0634921	0.0634633		0.999	843.37	0.629972	842.74	1.25994	844	0.00149283	0.00832025
		0.661	2136	70	2066	140	2206	0.0634633	0.0634633		0.999	844.366	0.6339	843.732	1.2678	845	0.00150035	0.00832025
		0.6606	2136	71	2065	142	2207	0.0643407	0.0640794		0.999	845.362	0.637844	844.724	1.27569	846	0.00150791	0.00832025
		0.66	2137	71	2066	142	2208	0.0643116	0.0640794		0.999	846.358	0.641805	845.716	1.28361	847	0.00151548	0.00832025
		0.6593	2138	71	2067	142	2209	0.0642825	0.0640794		0.999	847.354	0.645784	846.708	1.29157	848	0.00152307	0.00832025
		0.6589	2139	71	2068	142	2210	0.0642534	0.0640794		0.999	848.35	0.649779	847.7	1.29956	849	0.00153069	0.00832025
		0.6587	2140	71	2069	142	2211	0.0642243	0.0640794		0.999	849.346	0.653792	848.692	1.30758	850	0.00153833	0.00832025
		0.6573	2142	71	2071	142	2213	0.0641663	0.0640794		0.999	850.342	0.657822	849.684	1.31564	851	0.001546	0.00832025
		0.657	2143	71	2072	142	2214	0.0641373	0.0640794		0.999	851.338	0.661869	850.676	1.32374	852	0.00155368	0.00832025
		0.6564	2144	71	2073	142	2215	0.0641084	0.0640794		0.999	852.334	0.665933	851.668	1.33187	853	0.00156139	0.00832025
		0.6558	2145	71	2074	142	2216	0.0640794	0.0640794		0.999	853.33	0.670015	852.66	1.34003	854	0.00156912	0.00832025
		0.6557	2145	72	2073	144	2217	0.0649526	0.0649526		0.999	854.326	0.674114	853.652	1.34823	855	0.00157687	0.00832025
		0.6549	2145	73	2072	146	2218	0.0658251	0.0657362		0.999	855.322	0.67823	854.644	1.35646	856	0.00158465	0.00832025
		0.6548	2146	73	2073	146	2219	0.0657954	0.0657362		0.999	856.318	0.682364	855.635	1.36473	857	0.00159245	0.00832025
		0.6529	2147	73	2074	146	2220	0.0657658	0.0657362		0.999	857.313	0.686516	856.627	1.37303	858	0.00160027	0.00832025
		0.6523	2148	73	2075	146	2221	0.0657362	0.0657362		0.999	858.309	0.690684	857.619	1.38137	859	0.00160811	0.00832025
		0.6517	2148	74	2074	148	2222	0.0666067	0.066338		0.999	859.305	0.694871	858.61	1.38974	860	0.00161598	0.00832025
		0.6516	2149	74	2075	148	2223	0.0665767	0.066338		0.999	860.301	0.699075	859.602	1.39815	861	0.00162387	0.00832025
		0.6507	2151	74	2077	148	2225	0.0665169	0.066338		0.999	861.297	0.703297	860.593	1.40659	862	0.00163178	0.00832025
		0.6504	2152	74	2078	148	2226	0.066487	0.066338		0.999	862.292	0.707536	861.585	1.41507	863	0.00163971	0.00832025
		0.6503	2153	74	2079	148	2227	0.0664571	0.066338		0.999	863.288	0.711793	862.576	1.42359	864	0.00164767	0.00832025
		0.6488	2154	74	2080	148	2228	0.0664273	0.066338		0.999	864.284	0.716068	863.568	1.43214	865	0.00165565	0.00832025
		0.6478	2156	74	2082	148	2230	0.0663677	0.066338		0.999	865.28	0.720361	864.559	1.44072	866	0.00166365	0.00832025
		0.6472	2157	74	2083	148	2231	0.066338	0.066338		0.999	866.275	0.724672	865.551	1.44934	867	0.00167168	0.00832025
		0.6465	2157	75	2082	150	2232	0.0672043	0.0671742		0.999	867.271	0.729	866.542	1.458	868	0.00167972	0.00832025
		0.646	2158	75	2083	150	2233	0.0671742	0.0671742		0.999	868.267	0.733347	867.533	1.46669	869	0.00168779	0.00832025
		0.6447	2158	76	2082	152	2234	0.0680394	0.0677966		0.999	869.262	0.737711	868.525	1.47542	870	0.00169589	0.00832025
		0.6426	2159	76	2083	152	2235	0.0680089	0.0677966		0.999	870.258	0.742094	869.516	1.48419	871	0.001704	0.00832025
		0.6424	2160	76	2084	152	2236	0.0679785	0.0677966		0.999	871.254	0.746495	870.507	1.49299	872	0.00171214	0.00832025
		0.642	2161	76	2085	152	2237	0.0679481	0.0677966		0.999	872.249	0.750913	871.498	1.50183	873	0.00172031	0.00832025
		0.6411	2164	76	2088	152	2240	0.0678571	0.0677966		0.999	873.245	0.75535	872.489	1.5107	874	0.00172849	0.00832025
		0.6408	2165	76	2089	152	2241	0.0678269	0.0677966		0.999	874.24	0.759805	873.48	1.51961	875	0.0017367	0.00832025
		0.6405	2166	76	2090	152	2242	0.0677966	0.0677966		0.999	875.236	0.764279	874.471	1.52856	876	0.00174493	0.00832025
		0.6403	2168	77	2091	154	2245	0.0685969	0.0685663		0.999	876.231	0.768771	875.462	1.53754	877	0.00175318	0.00832025
		0.6383	2169	77	2092	154	2246	0.0685663	0.0685663		0.999	877.227	0.773281	876.453	1.54656	878	0.00176146	0.00832025
		0.6381	2169	79	2090	158	2248	0.0702847	0.0702222		0.999	878.222	0.777809	877.444	1.55562	879	0.00176976	0.00832025
		0.6377	2170	79	2091	158	2249	0.0702534	0.0702222		0.999	879.218	0.782356	878.435	1.56471	880	0.00177808	0.00832025
		0.6368	2171	79	2092	158	2250	0.0702222	0.0702222		0.999	880.213	0.786921	879.426	1.57384	881	0.00178643	0.00832025
		0.636	2171	80	2091	160	2251	0.0710795	0.0710795		0.999	881.208	0.791505	880.417	1.58301	882	0.0017948	0.00832025
		0.6351	2171	81	2090	162	2252	0.0719361	0.0715864		0.999	882.204	0.796107	881.408	1.59221	883	0.00180319	0.00832025
		0.635	2172	81	2091	162	2253	0.0719041	0.0715864		0.999	883.199	0.800729	882.399	1.60146	884	0.0018116	0.00832025
		0.6348	2173	81	2092	162	2254	0.0718722	0.0715864		0.999	884.195	0.805368	883.389	1.61074	885	0.00182004	0.00832025
		0.6345	2175	81	2094	162	2256	0.0718085	0.0715864		0.999	885.19	0.810027	884.38	1.62005	886	0.0018285	0.00832025
		0.6336	2176	81	2095	162	2257	0.0717767	0.0715864		0.999	886.185	0.814704	885.371	1.62941	887	0.00183699	0.00832025
		0.6325	2177	81	2096	162	2258	0.0717449	0.0715864		0.999	887.181	0.819399	886.361	1.6388	888	0.00184549	0.00832025
		0.6321	2178	81	2097	162	2259	0.0717131	0.0715864		0.999	888.176	0.824114	887.352	1.64823	889	0.00185403	0.00832025
		0.632	2179	81	2098	162	2260	0.0716814	0.0715864		0.999	889.171	0.828848	888.342	1.6577	890	0.00186258	0.00832025
		0.6314	2180	81	2099	162	2261	0.0716497	0.0715864		0.999	890.166	0.8336	889.333	1.6672	891	0.00187116	0.00832025
		0.6313	2181	81	2100	162	2262	0.071618	0.0715864		0.999	891.162	0.838372	890.323	1.67674	892	0.00187976	0.00832025
		0.6303	2182	81	2101	162	2263	0.0715864	0.0715864		0.999	892.157	0.843162	891.314	1.68632	893	0.00188838	0.00832025
		0.6301	2182	82	2100	164	2264	0.0724382	0.0724382		0.999	893.152	0.847971	892.304	1.69594	894	0.00189703	0.00832025
		0.6297	2182	83	2099	166	2265	0.0732892	0.0732892		0.999	894.147	0.8528	893.294	1.7056	895	0.0019057	0.00832025
		0.629	2183	84	2099	168	2267	0.0741067	0.0739437		0.999	895.142	0.857648	894.285	1.7153	896	0.00191439	0.00832025
		0.6285	2184	84	2100	168	2268	0.0740741	0.0739437		0.999	896.137	0.862515	895.275	1.72503	897	0.00192311	0.00832025
		0.6279	2185	84	2101	168	2269	0.0740414	0.0739437		0.999	897.133	0.867401	896.265	1.7348	898	0.00193185	0.00832025
		0.6277	2186	84	2102	168	2270	0.0740088	0.0739437		0.999	898.128	0.872306	897.255	1.74461	899	0.00194061	0.00832025
		0.6273	2187	84	2103	168	2271	0.0739762	0.0739437		0.999	899.123	0.877231	898.246	1.75446	900	0.0019494	0.00832025
		0.6268	2188	84	2104	168	2272	0.0739437	0.0739437		0.999	900.118	0.882175	899.236	1.76435	901	0.00195821	0.00832025
		0.626	2188	85	2103	170	2273	0.074791	0.0745941		0.999	901.113	0.887138	900.226	1.77428	902	0.00196705	0.00832025
		0.6253	2189	85	2104	170	2274	0.0747581	0.0745941		0.999	902.108	0.892121	901.216	1.78424	903	0.0019759	0.00832025
		0.6245	2190	85	2105	170	2275	0.0747253	0.0745941		0.999	903.103	0.897123	902.206	1.79425	904	0.00198479	0.00832025
		0.6243	2191	85	2106	170	2276	0.0746924	0.0745941		0.999	904.098	0.902145	903.196	1.80429	905	0.00199369	0.00832025
		0.6231	2192	85	2107	170	2277	0.0746596	0.0745941		0.999	905.093	0.907187	904.186	1.81437	906	0.00200262	0.00832025
		0.6222	2193	85	2108	170	2278	0.0746269	0.0745941		0.999	906.088	0.912248	905.176	1.8245	907	0.00201157	0.00832025
		0.6219	2194	85	2109	170	2279	0.0745941	0.0745941		0.999	907.083	0.917329	906.165	1.83466	908	0.00202055	0.00832025
		0.6212	2198	86	2112	172	2284	0.0753065	0.0752406		0.999	908.078	0.922429	907.155	1.84486	909	0.00202955	0.00832025
		0.6197	2199	86	2113	172	2285	0.0752735	0.0752406		0.9989	909.072	0.92755	908.145	1.8551	910	0.00203857	0.0102604
		0.6191	2200	86	2114	172	2286	0.0752406	0.0752406		0.9989	910.067	0.93269	909.135	1.86538	911	0.00204762	0.0102604
		0.6179	2200	88	2112	176	2288	0.0769231	0.0769231		0.9988	911.062	0.93785	910.124	1.8757	912	0.00205669	0.0103797
		0.617	2201	89	2112	178	2290	0.0777293	0.0776614		0.9988	912.057	0.94303	911.114	1.88606	913	0.00206578	0.0103797
		0.6167	2202	89	2113	178	2291	0.0776953	0.0776614		0.9988	913.052	0.94823	912.104	1.89646	914	0.0020749	0.0103797
		0.6164	2203	89	2114	178	2292	0.0776614	0.0776614		0.9988	914.047	0.953449	913.093	1.9069	915	0.00208404	0.0103797
		0.6161	2203	90	2113	180	2293	0.0784998	0.0783972		0.9987	915.041	0.958689	914.083	1.91738	916	0.00209321	0.0105401
		0.6153	2204	90	2114	180	2294	0.0784656	0.0783972		0.9987	916.036	0.963949	915.072	1.9279	917	0.0021024	0.0105401
		0.6149	2206	90	2116	180	2296	0.0783972	0.0783972		0.9987	917.031	0.969229	916.062	1.93846	918	0.00211161	0.0105401
		0.6148	2206	91	2115	182	2297	0.0792338	0.0791993		0.9987	918.025	0.97453	917.051	1.94906	919	0.00212085	0.0105401
		0.6143	2207	91	2116	182	2298	0.0791993	0.0791993		0.9986	919.02	0.97985	918.04	1.9597	920	0.00213011	0.0109888
		0.6141	2207	92	2115	184	2299	0.0800348	0.0797227		0.9986	920.015	0.985191	919.03	1.97038	921	0.00213939	0.0109888
		0.6138	2209	92	2117	184	2301	0.0799652	0.0797227		0.9986	921.009	0.990552	920.019	1.9811	922	0.0021487	0.0109888
		0.6135	2211	92	2119	184	2303	0.0798958	0.0797227		0.9986	922.004	0.995934	921.008	1.99187	923	0.00215804	0.0109888
		0.6123	2212	92	2120	184	2304	0.0798611	0.0797227		0.9986	922.999	1.00134	921.997	2.00267	924	0.00216739	0.0109888
		0.6114	2214	92	2122	184	2306	0.0797918	0.0797227		0.9986	923.993	1.00676	922.986	2.01352	925	0.00217677	0.0109888
		0.6109	2215	92	2123	184	2307	0.0797573	0.0797227		0.9986	924.988	1.0122	923.976	2.0244	926	0.00218618	0.0109888
		0.6107	2216	92	2124	184	2308	0.0797227	0.0797227		0.9986	925.982	1.01766	924.965	2.03533	927	0.00219561	0.0109888
		0.61	2216	93	2123	186	2309	0.0805544	0.0804498		0.9986	926.977	1.02315	925.954	2.0463	928	0.00220506	0.0109888
		0.6099	2217	93	2124	186	2310	0.0805195	0.0804498		0.9986	927.971	1.02865	926.943	2.05731	929	0.00221454	0.0109888
		0.6098	2218	93	2125	186	2311	0.0804846	0.0804498		0.9986	928.966	1.03418	927.932	2.06836	930	0.00222404	0.0109888
		0.6091	2219	93	2126	186	2312	0.0804498	0.0804498		0.9986	929.96	1.03972	928.921	2.07945	931	0.00223357	0.0109888
		0.6087	2219	94	2125	188	2313	0.0812797	0.0812446		0.9986	930.955	1.04529	929.909	2.09058	932	0.00224312	0.0109888
		0.6078	2220	94	2126	188	2314	0.0812446	0.0812446		0.9986	931.949	1.05088	930.898	2.10176	933	0.00225269	0.0109888
		0.6061	2220	95	2125	190	2315	0.0820734	0.0818966		0.9986	932.944	1.05649	931.887	2.11298	934	0.00226229	0.0109888
		0.6059	2221	95	2126	190	2316	0.082038	0.0818966		0.9986	933.938	1.06212	932.876	2.12424	935	0.00227191	0.0109888
		0.6057	2222	95	2127	190	2317	0.0820026	0.0818966		0.9986	934.932	1.06777	933.864	2.13554	936	0.00228156	0.0109888
		0.6051	2223	95	2128	190	2318	0.0819672	0.0818966		0.9986	935.927	1.07344	934.853	2.14688	937	0.00229123	0.0109888
		0.605	2224	95	2129	190	2319	0.0819319	0.0818966		0.9985	936.921	1.07913	935.842	2.15827	938	0.00230092	0.0114702
		0.6043	2225	95	2130	190	2320	0.0818966	0.0818966		0.9985	937.915	1.08485	936.83	2.16969	939	0.00231064	0.0114702
		0.6037	2225	96	2129	192	2321	0.082723	0.0826873		0.9985	938.909	1.09058	937.819	2.18116	940	0.00232039	0.0114702
		0.6036	2226	96	2130	192	2322	0.0826873	0.0826873		0.9985	939.904	1.09634	938.807	2.19268	941	0.00233016	0.0114702
		0.6028	2226	97	2129	194	2323	0.0835127	0.0832618		0.9985	940.898	1.10212	939.796	2.20423	942	0.00233995	0.0114702
		0.6027	2227	97	2130	194	2324	0.0834768	0.0832618		0.9984	941.892	1.10792	940.784	2.21583	943	0.00234977	0.011705
		0.6025	2228	97	2131	194	2325	0.0834409	0.0832618		0.9984	942.886	1.11374	941.773	2.22747	944	0.00235961	0.011705
		0.6019	2229	97	2132	194	2326	0.083405	0.0832618		0.9984	943.88	1.11958	942.761	2.23915	945	0.00236948	0.011705
		0.6017	2230	97	2133	194	2327	0.0833691	0.0832618		0.9984	944.875	1.12544	943.749	2.25088	946	0.00237937	0.011705
		0.6015	2231	97	2134	194	2328	0.0833333	0.0832618		0.9984	945.869	1.13133	944.737	2.26265	947	0.00238928	0.011705
		0.6011	2232	97	2135	194	2329	0.0832976	0.0832618		0.9984	946.863	1.13723	945.726	2.27446	948	0.00239922	0.011705
		0.601	2233	97	2136	194	2330	0.0832618	0.0832618		0.9983	947.857	1.14316	946.714	2.28632	949	0.00240919	0.0119428
		0.6009	2233	98	2135	196	2331	0.0840841	0.0839041		0.9983	948.851	1.14911	947.702	2.29822	950	0.00241918	0.0119428
		0.5994	2234	98	2136	196	2332	0.084048	0.0839041		0.9983	949.845	1.15508	948.69	2.31016	951	0.00242919	0.0119428
		0.5991	2235	98	2137	196	2333	0.084012	0.0839041		0.9983	950.839	1.16107	949.678	2.32215	952	0.00243923	0.0119428
		0.5985	2236	98	2138	196	2334	0.083976	0.0839041		0.9983	951.833	1.16709	950.666	2.33418	953	0.00244929	0.0119428
		0.5976	2237	98	2139	196	2335	0.08394	0.0839041		0.9982	952.827	1.17313	951.654	2.34625	954	0.00245938	0.0121176
		0.5974	2238	98	2140	196	2336	0.0839041	0.0839041		0.9982	953.821	1.17918	952.642	2.35837	955	0.0024695	0.0121176
		0.5971	2238	99	2139	198	2337	0.084724	0.0846516		0.9982	954.815	1.18527	953.629	2.37053	956	0.00247963	0.0121176
		0.5968	2239	99	2140	198	2338	0.0846878	0.0846516		0.9981	955.809	1.19137	954.617	2.38274	957	0.0024898	0.0122057
		0.5961	2240	99	2141	198	2339	0.0846516	0.0846516		0.998	956.803	1.19749	955.605	2.39499	958	0.00249999	0.0123607
		0.5952	2240	100	2140	200	2340	0.0854701	0.0853606		0.998	957.796	1.20364	956.593	2.40728	959	0.0025102	0.0123607
		0.595	2242	100	2142	200	2342	0.0853971	0.0853606		0.998	958.79	1.20981	957.58	2.41962	960	0.00252044	0.0123607
		0.5944	2243	100	2143	200	2343	0.0853606	0.0853606		0.998	959.784	1.216	958.568	2.432	961	0.0025307	0.0123607
		0.594	2243	101	2142	202	2344	0.0861775	0.0861775		0.998	960.778	1.22221	959.556	2.44443	962	0.00254099	0.0123607
		0.5935	2244	102	2142	204	2346	0.0869565	0.0868085		0.998	961.772	1.22845	960.543	2.4569	963	0.0025513	0.0123607
		0.5932	2245	102	2143	204	2347	0.0869195	0.0868085		0.9979	962.765	1.23471	961.531	2.46942	964	0.00256164	0.0125394
		0.5927	2246	102	2144	204	2348	0.0868825	0.0868085		0.9979	963.759	1.24099	962.518	2.48198	965	0.002572	0.0125394
		0.5923	2247	102	2145	204	2349	0.0868455	0.0868085		0.9978	964.753	1.24729	963.505	2.49459	966	0.00258239	0.0126971
		0.5922	2248	102	2146	204	2350	0.0868085	0.0868085		0.9978	965.746	1.25362	964.493	2.50724	967	0.0025928	0.0126971
		0.5917	2248	103	2145	206	2351	0.0876223	0.0876223		0.9978	966.74	1.25997	965.48	2.51994	968	0.00260324	0.0126971
		0.591	2248	104	2144	208	2352	0.0884354	0.0883978		0.9978	967.734	1.26634	966.467	2.53268	969	0.0026137	0.0126971
		0.5901	2249	104	2145	208	2353	0.0883978	0.0883978		0.9978	968.727	1.27273	967.455	2.54547	970	0.00262419	0.0126971
		0.5899	2249	105	2144	210	2354	0.0892099	0.0891341		0.9977	969.721	1.27915	968.442	2.5583	971	0.00263471	0.0129017
		0.5897	2250	105	2145	210	2355	0.089172	0.0891341		0.9977	970.714	1.28559	969.429	2.57118	972	0.00264525	0.0129017
		0.5895	2251	105	2146	210	2356	0.0891341	0.0891341		0.9977	971.708	1.29205	970.416	2.5841	973	0.00265581	0.0129017
		0.5894	2251	106	2145	212	2357	0.0899448	0.0897165		0.9977	972.701	1.29854	971.403	2.59707	974	0.0026664	0.0129017
		0.589	2252	106	2146	212	2358	0.0899067	0.0897165		0.9976	973.695	1.30504	972.39	2.61009	975	0.00267701	0.0130854
		0.5888	2253	106	2147	212	2359	0.0898686	0.0897165		0.9976	974.688	1.31158	973.377	2.62315	976	0.00268766	0.0130854
		0.5886	2255	106	2149	212	2361	0.0897925	0.0897165		0.9976	975.682	1.31813	974.364	2.63626	977	0.00269832	0.0130854
		0.5885	2256	106	2150	212	2362	0.0897544	0.0897165		0.9976	976.675	1.32471	975.351	2.64941	978	0.00270901	0.0130854
		0.5876	2257	106	2151	212	2363	0.0897165	0.0897165		0.9975	977.669	1.33131	976.337	2.66262	979	0.00271973	0.013201
		0.5864	2257	107	2150	214	2364	0.0905245	0.0905245		0.9974	978.662	1.33793	977.324	2.67586	980	0.00273047	0.013294
		0.5863	2258	108	2150	216	2366	0.0912933	0.0909474		0.9974	979.655	1.34458	978.311	2.68916	981	0.00274124	0.013294
		0.5861	2262	108	2154	216	2370	0.0911392	0.0909474		0.9974	980.649	1.35125	979.298	2.7025	982	0.00275203	0.013294
		0.5849	2263	108	2155	216	2371	0.0911008	0.0909474		0.9973	981.642	1.35794	980.284	2.71589	983	0.00276285	0.0135284
		0.5847	2264	108	2156	216	2372	0.0910624	0.0909474		0.9973	982.635	1.36466	981.271	2.72932	984	0.0027737	0.0135284
		0.5845	2265	108	2157	216	2373	0.091024	0.0909474		0.9973	983.629	1.3714	982.257	2.7428	985	0.00278457	0.0135284
		0.5836	2266	108	2158	216	2374	0.0909857	0.0909474		0.9973	984.622	1.37816	983.244	2.75633	986	0.00279547	0.0135284
		0.5834	2267	108	2159	216	2375	0.0909474	0.0909474		0.9973	985.615	1.38495	984.23	2.76991	987	0.00280639	0.0135284
		0.5829	2267	109	2158	218	2376	0.0917508	0.0917122		0.9973	986.608	1.39176	985.216	2.78353	988	0.00281734	0.0135284
		0.5821	2268	109	2159	218	2377	0.0917122	0.0917122		0.9973	987.601	1.3986	986.203	2.7972	989	0.00282831	0.0135284
		0.5818	2268	110	2158	220	2378	0.0925147	0.0920117		0.9972	988.595	1.40546	987.189	2.81092	990	0.00283931	0.0137655
		0.5816	2269	110	2159	220	2379	0.0924758	0.0920117		0.9972	989.588	1.41234	988.175	2.82468	991	0.00285033	0.0137655
		0.581	2270	110	2160	220	2380	0.092437	0.0920117		0.9972	990.581	1.41925	989.162	2.8385	992	0.00286139	0.0137655
		0.5802	2271	110	2161	220	2381	0.0923982	0.0920117		0.9971	991.574	1.42618	990.148	2.85236	993	0.00287246	0.013909
		0.58	2273	110	2163	220	2383	0.0923206	0.0920117		0.9971	992.567	1.43313	991.134	2.86627	994	0.00288357	0.013909
		0.5798	2274	110	2164	220	2384	0.0922819	0.0920117		0.9971	993.56	1.44011	992.12	2.88022	995	0.0028947	0.013909
		0.5796	2276	110	2166	220	2386	0.0922045	0.0920117		0.997	994.553	1.44711	993.106	2.89423	996	0.00290585	0.0140053
		0.5788	2277	110	2167	220	2387	0.0921659	0.0920117		0.9969	995.546	1.45414	994.092	2.90828	997	0.00291703	0.0141992
		0.5786	2278	110	2168	220	2388	0.0921273	0.0920117		0.9969	996.539	1.46119	995.078	2.92238	998	0.00292824	0.0141992
		0.5779	2279	110	2169	220	2389	0.0920887	0.0920117		0.9969	997.532	1.46827	996.063	2.93653	999	0.00293947	0.0141992
		0.5776	2280	110	2170	220	2390	0.0920502	0.0920117		0.9969	998.525	1.47537	997.049	2.95073	1000	0.00295073	0.0141992
		0.5769	2281	110	2171	220	2391	0.0920117	0.0920117		0.9969	999.518	1.48249	998.035	2.96498	1001	0.00296202	0.0141992
		0.575	2281	111	2170	222	2392	0.0928094	0.0926931		0.9969	1000.51	1.48964	999.021	2.97928	1002	0.00297333	0.0141992
		0.574	2282	111	2171	222	2393	0.0927706	0.0926931		0.9969	1001.5	1.49681	1000.01	2.99362	1003	0.00298467	0.0141992
		0.5739	2284	111	2173	222	2395	0.0926931	0.0926931		0.9968	1002.5	1.50401	1000.99	3.00802	1004	0.00299603	0.0144933
		0.5736	2284	112	2172	224	2396	0.0934891	0.0932168		0.9968	1003.49	1.51123	1001.98	3.02246	1005	0.00300742	0.0144933
		0.5716	2285	112	2173	224	2397	0.0934501	0.0932168		0.9968	1004.48	1.51848	1002.96	3.03696	1006	0.00301884	0.0144933
		0.5711	2286	112	2174	224	2398	0.0934112	0.0932168		0.9968	1005.47	1.52575	1003.95	3.0515	1007	0.00303029	0.0144933
		0.5703	2287	112	2175	224	2399	0.0933722	0.0932168		0.9968	1006.47	1.53305	1004.93	3.06609	1008	0.00304176	0.0144933
		0.57	2288	112	2176	224	2400	0.0933333	0.0932168		0.9967	1007.46	1.54037	1005.92	3.08073	1009	0.00305325	0.0147665
		0.5693	2289	112	2177	224	2401	0.0932945	0.0932168		0.9967	1008.45	1.54771	1006.9	3.09542	1010	0.00306478	0.0147665
		0.5692	2290	112	2178	224	2402	0.0932556	0.0932168		0.9967	1009.44	1.55508	1007.89	3.11017	1011	0.00307633	0.0147665
		0.5687	2291	112	2179	224	2403	0.0932168	0.0932168		0.9967	1010.44	1.56248	1008.88	3.12496	1012	0.0030879	0.0147665
		0.5683	2291	113	2178	226	2404	0.09401	0.093427		0.9967	1011.43	1.5699	1009.86	3.1398	1013	0.00309951	0.0147665
		0.5682	2292	113	2179	226	2405	0.0939709	0.093427		0.9967	1012.42	1.57735	1010.85	3.15469	1014	0.00311113	0.0147665
		0.5681	2293	113	2180	226	2406	0.0939318	0.093427		0.9966	1013.42	1.58482	1011.83	3.16963	1015	0.00312279	0.0150686
		0.5678	2294	113	2181	226	2407	0.0938928	0.093427		0.9966	1014.41	1.59231	1012.82	3.18463	1016	0.00313447	0.0150686
		0.5677	2295	113	2182	226	2408	0.0938538	0.093427		0.9966	1015.4	1.59983	1013.8	3.19967	1017	0.00314618	0.0150686
		0.5667	2297	113	2184	226	2410	0.0937759	0.093427		0.9966	1016.39	1.60738	1014.79	3.21476	1018	0.00315792	0.0150686
		0.5666	2298	113	2185	226	2411	0.093737	0.093427		0.9966	1017.39	1.61495	1015.77	3.22991	1019	0.00316968	0.0150686
		0.5662	2299	113	2186	226	2412	0.0936982	0.093427		0.9966	1018.38	1.62255	1016.75	3.2451	1020	0.00318147	0.0150686
		0.5659	2300	113	2187	226	2413	0.0936593	0.093427		0.9965	1019.37	1.63017	1017.74	3.26035	1021	0.00319329	0.0152467
		0.5651	2301	113	2188	226	2414	0.0936205	0.093427		0.9964	1020.36	1.63782	1018.72	3.27565	1022	0.00320513	0.0154263
		0.5649	2304	113	2191	226	2417	0.0935043	0.093427		0.9964	1021.35	1.6455	1019.71	3.291	1023	0.00321701	0.0154263
		0.5647	2305	113	2192	226	2418	0.0934657	0.093427		0.9964	1022.35	1.6532	1020.69	3.3064	1024	0.0032289	0.0154263
		0.5645	2306	113	2193	226	2419	0.093427	0.093427		0.9964	1023.34	1.66092	1021.68	3.32185	1025	0.00324083	0.0154263
		0.5641	2306	114	2192	228	2420	0.0942149	0.0942149		0.9964	1024.33	1.66868	1022.66	3.33735	1026	0.00325278	0.0154263
		0.5625	2306	115	2191	230	2421	0.0950021	0.0950021		0.9964	1025.32	1.67645	1023.65	3.35291	1027	0.00326476	0.0154263
		0.5623	2307	116	2191	232	2423	0.0957491	0.0957491		0.9963	1026.32	1.68426	1024.63	3.36852	1028	0.00327677	0.0156333
		0.5622	2307	117	2190	234	2424	0.0965347	0.0963359		0.9963	1027.31	1.69209	1025.62	3.38417	1029	0.0032888	0.0156333
		0.5621	2309	117	2192	234	2426	0.0964551	0.0963359		0.9962	1028.3	1.69994	1026.6	3.39989	1030	0.00330086	0.0157114
		0.562	2310	117	2193	234	2427	0.0964153	0.0963359		0.9961	1029.29	1.70782	1027.58	3.41565	1031	0.00331295	0.015816
		0.5617	2311	117	2194	234	2428	0.0963756	0.0963359		0.9961	1030.28	1.71573	1028.57	3.43147	1032	0.00332506	0.015816
		0.5616	2312	117	2195	234	2429	0.0963359	0.0963359		0.9961	1031.28	1.72367	1029.55	3.44733	1033	0.00333721	0.015816
		0.5609	2312	118	2194	236	2430	0.0971193	0.0971193		0.996	1032.27	1.73163	1030.54	3.46326	1034	0.00334938	0.0159738
		0.56	2312	119	2193	238	2431	0.0979021	0.0977413		0.996	1033.26	1.73961	1031.52	3.47923	1035	0.00336157	0.0159738
		0.5599	2313	119	2194	238	2432	0.0978618	0.0977413		0.996	1034.25	1.74763	1032.5	3.49526	1036	0.0033738	0.0159738
		0.5585	2315	119	2196	238	2434	0.0977814	0.0977413		0.9959	1035.24	1.75567	1033.49	3.51134	1037	0.00338605	0.0161061
		0.558	2316	119	2197	238	2435	0.0977413	0.0977413		0.9959	1036.24	1.76373	1034.47	3.52747	1038	0.00339833	0.0161061
		0.5562	2316	120	2196	240	2436	0.0985222	0.0985222		0.9958	1037.23	1.77183	1035.46	3.54365	1039	0.00341064	0.0162125
		0.5559	2317	121	2196	242	2438	0.0992617	0.0992617		0.9958	1038.22	1.77995	1036.44	3.55989	1040	0.00342297	0.0162125
		0.5555	2317	122	2195	244	2439	0.100041	0.0998363		0.9957	1039.21	1.78809	1037.42	3.57619	1041	0.00343534	0.0163463
		0.5554	2318	122	2196	244	2440	0.1	0.0998363		0.9957	1040.2	1.79627	1038.41	3.59253	1042	0.00344773	0.0163463
		0.5552	2319	122	2197	244	2441	0.099959	0.0998363		0.9957	1041.2	1.80447	1039.39	3.60893	1043	0.00346015	0.0163463
		0.5551	2320	122	2198	244	2442	0.0999181	0.0998363		0.9956	1042.19	1.81269	1040.37	3.62539	1044	0.00347259	0.0164538
		0.5539	2321	122	2199	244	2443	0.0998772	0.0998363		0.9955	1043.18	1.82095	1041.36	3.64189	1045	0.00348507	0.016616
		0.5532	2322	122	2200	244	2444	0.0998363	0.0998363		0.9955	1044.17	1.82923	1042.34	3.65846	1046	0.00349757	0.016616
		0.5527	2322	123	2199	246	2445	0.100613	0.100449		0.9955	1045.16	1.83754	1043.32	3.67507	1047	0.0035101	0.016616
		0.5524	2323	123	2200	246	2446	0.100572	0.100449		0.9955	1046.15	1.84587	1044.31	3.69174	1048	0.00352265	0.016616
		0.5522	2325	123	2202	246	2448	0.10049	0.100449		0.9955	1047.15	1.85423	1045.29	3.70847	1049	0.00353524	0.016616
		0.5519	2326	123	2203	246	2449	0.100449	0.100449		0.9954	1048.14	1.86262	1046.27	3.72525	1050	0.00354785	0.0168068
		0.5515	2326	124	2202	248	2450	0.101224	0.101183		0.9954	1049.13	1.87104	1047.26	3.74208	1051	0.0035605	0.0168068
		0.5509	2327	124	2203	248	2451	0.101183	0.101183		0.9953	1050.12	1.87948	1048.24	3.75897	1052	0.00357316	0.016889
		0.5508	2327	125	2202	250	2452	0.101958	0.10175		0.9952	1051.11	1.88796	1049.22	3.77591	1053	0.00358586	0.0169715
		0.5507	2328	125	2203	250	2453	0.101916	0.10175		0.9952	1052.1	1.89646	1050.21	3.79291	1054	0.00359859	0.0169715
		0.5504	2329	125	2204	250	2454	0.101874	0.10175		0.9951	1053.1	1.90498	1051.19	3.80997	1055	0.00361134	0.0171651
		0.5496	2330	125	2205	250	2455	0.101833	0.10175		0.9951	1054.09	1.91354	1052.17	3.82708	1056	0.00362413	0.0171651
		0.5495	2331	125	2206	250	2456	0.101792	0.10175		0.9951	1055.08	1.92212	1053.16	3.84424	1057	0.00363694	0.0171651
		0.5494	2332	125	2207	250	2457	0.10175	0.10175		0.9951	1056.07	1.93073	1054.14	3.86146	1058	0.00364978	0.0171651
		0.5493	2332	126	2206	252	2458	0.102522	0.102273		0.9951	1057.06	1.93937	1055.12	3.87874	1059	0.00366264	0.0171651
		0.5487	2333	126	2207	252	2459	0.102481	0.102273		0.995	1058.05	1.94804	1056.1	3.89607	1060	0.00367554	0.0173603
		0.5479	2334	126	2208	252	2460	0.102439	0.102273		0.995	1059.04	1.95673	1057.09	3.91346	1061	0.00368846	0.0173603
		0.5462	2335	126	2209	252	2461	0.102397	0.102273		0.9949	1060.03	1.96545	1058.07	3.9309	1062	0.00370142	0.0175007
		0.5458	2336	126	2210	252	2462	0.102356	0.102273		0.9949	1061.03	1.9742	1059.05	3.9484	1063	0.0037144	0.0175007
		0.5452	2337	126	2211	252	2463	0.102314	0.102273		0.9949	1062.02	1.98298	1060.03	3.96596	1064	0.00372741	0.0175007
		0.5443	2338	126	2212	252	2464	0.102273	0.102273		0.9948	1063.01	1.99179	1061.02	3.98358	1065	0.00374045	0.0184776
		0.5435	2338	127	2211	254	2465	0.103043	0.102626		0.9948	1064	2.00062	1062	4.00125	1066	0.00375351	0.0184776
		0.5434	2342	127	2215	254	2469	0.102876	0.102626		0.9948	1064.99	2.00949	1062.98	4.01897	1067	0.00376661	0.0184776
		0.5417	2343	127	2216	254	2470	0.102834	0.102626		0.9948	1065.98	2.01838	1063.96	4.03676	1068	0.00377973	0.0184776
		0.5415	2344	127	2217	254	2471	0.102792	0.102626		0.9948	1066.97	2.0273	1064.95	4.0546	1069	0.00379289	0.0184776
		0.5414	2345	127	2218	254	2472	0.102751	0.102626		0.9948	1067.96	2.03625	1065.93	4.0725	1070	0.00380607	0.0184776
		0.5409	2346	127	2219	254	2473	0.102709	0.102626		0.9948	1068.95	2.04523	1066.91	4.09045	1071	0.00381928	0.0184776
		0.5403	2347	127	2220	254	2474	0.102668	0.102626		0.9948	1069.95	2.05423	1067.89	4.10846	1072	0.00383252	0.0184776
		0.5395	2348	127	2221	254	2475	0.102626	0.102626		0.9948	1070.94	2.06327	1068.87	4.12654	1073	0.00384579	0.0184776
[truncated: 5,695 more rows]

## Sheet: Spectral Level Data
Spectral Level Data		Confidence Threshold	Forward	Reverse	Correct	Incorrect	Total	Global FDR	q-value		Fit Confidence Threshold	Fit Forward	Fit Reverse	Fit Correct	Fit Incorrect	Fit Total	Fit Global FDR	Fit Local FDR
[truncated: 10,248 more rows]

[truncated: 13 more sheets: Search Summary, Advanced Metadata, Speed and Distribution Analysis, Single Results Table, Protein FDR Summary, Distinct Peptide FDR Summary, Spectrum FDR Summary, PDST Controls, Protein Summary, Peptide Summary, Distinct Peptide Summary, Feature Summary, Single Column Summary]
