# Supplementary material for: In vivo proteomic mapping through GFP-directed proximity-dependent biotin labelling in zebrafish
Source: eLife. 2021 Feb 16;10:e64631. doi: 10.7554/eLife.64631 (PMC7906605; doi:10.7554/eLife.64631)
Supplement: Supplementary file 1. [file elife-64631-supp1.xlsx]

## Sheet: Summary
Table	Tab name	Description
Table 1	Cavin1a proteome	proteins identified in embryos expressing Cavin1a-Clover and TurboID-dGBP
Table 2	Cavin4a proteome	proteins identified in embryos expressing Cavin4a-Clover and TurboID-dGBP
Table 3	Cavin4b proteome	proteins identified in embryos expressing Cavin4b-Clover and TurboID-dGBP
Table 4	Heatmap	proteins identified in all cavin samples with annotation

## Sheet: Cavin1a proteome
Table 1: Proteins identified in embryos expressing Cavin1a-Clover and TurboID-dGBP
		Cavin1a-Clover + TurboID-dGBP			TurboID-dGBP control			Enrichment score
Accession	Name	% Coverage	Peptide (95%)	MS2Count	% Coverage	Peptide (95%)	MS2Count
sp|A1L260|CVN4A_DANRE	Caveolae-associated protein 4a OS=Danio rerio OX=7955 GN=cavin4a PE=1 SV=1	39.82	20	1.96983e+06	0	0	0	1
tr|B8A4X7|B8A4X7_DANRE	LIM and calponin homology domains 1a OS=Danio rerio OX=7955 GN=limch1a PE=1 SV=1	20.12	13	243361	0	0	0	1
tr|E7F0K3|E7F0K3_DANRE	Caveolae-associated protein 1a OS=Danio rerio OX=7955 GN=cavin1a PE=4 SV=1	31.08	15	4.33385e+06	0	0	0	1
tr|F1R0H8|F1R0H8_DANRE	Dystrophin OS=Danio rerio OX=7955 GN=dmd PE=1 SV=1	7.762	8	80125.4	0	0	0	1
tr|A2BGW3|A2BGW3_DANRE	Calcium/calmodulin-dependent protein kinase (CaM kinase) II beta 1 OS=Danio rerio OX=7955 GN=camk2b1 PE=1 SV=1	30.42	11	201583	0	0	0	1
sp|F1QWM2|DUS27_DANRE	Inactive dual specificity phosphatase 27 OS=Danio rerio OX=7955 GN=dusp27 PE=1 SV=1	10.36	5	59185.8	0	0	0	1
sp|Q9I8V0|PRV2_DANRE	Parvalbumin-2 OS=Danio rerio OX=7955 GN=pvalb2 PE=3 SV=3	57.8	4	52924.6	0	0	0	1
tr|F1QNB1|F1QNB1_DANRE	Ankyrin 3a OS=Danio rerio OX=7955 GN=ank3a PE=4 SV=2	3.277	5	142782	0	0	0	1
tr|Q7T358|Q7T358_DANRE	G1 to S phase transition 1 OS=Danio rerio OX=7955 GN=gspt1l PE=1 SV=1	14.21	5	25914.1	0	0	0	1
tr|F1R446|F1R446_DANRE	Spectrin alpha, non-erythrocytic 1 OS=Danio rerio OX=7955 GN=sptan1 PE=1 SV=1	2.984	3	10778.1	0	0	0	1
tr|F1QSU0|F1QSU0_DANRE	Caveolae-associated protein 4b OS=Danio rerio OX=7955 GN=cavin4b PE=1 SV=1	26.1	3	69183.4	0	0	0	1
tr|E7FDY6|E7FDY6_DANRE	EH domain-binding protein 1-like 1b OS=Danio rerio OX=7955 GN=ehbp1l1b PE=4 SV=1	4.03	3	19764.9	0	0	0	1
tr|B3DJR0|B3DJR0_DANRE	Cardiomyopathy associated 5 like OS=Danio rerio OX=7955 GN=cmya5 PE=2 SV=1	3.582	2	5245.53	0	0	0	1
tr|A0A2R8RS96|A0A2R8RS96_DANRE	Paralemmin 2 OS=Danio rerio OX=7955 GN=palm2 PE=4 SV=1	9.028	2	3428.86	0	0	0	1
tr|Q68EH0|Q68EH0_DANRE	G1 to S phase transition 1 OS=Danio rerio OX=7955 GN=gspt1 PE=1 SV=1	10.11	3	18340	0	0	0	1
tr|Q1LUT2|Q1LUT2_DANRE	DNA topoisomerase 2 OS=Danio rerio OX=7955 GN=top2b PE=1 SV=1	2.905	1	6101.5	0	0	0	1
tr|Q7ZV18|Q7ZV18_DANRE	Placental syntaxin 4A OS=Danio rerio OX=7955 GN=stx4 PE=1 SV=1	7.744	1	5702.11	0	0	0	1
tr|A0JMC2|A0JMC2_DANRE	Myhz2 protein (Fragment) OS=Danio rerio OX=7955 GN=myhz2 PE=2 SV=1	20.55	12	199743	0	0	0	1
tr|Q7ZSY2|Q7ZSY2_DANRE	Malate dehydrogenase OS=Danio rerio OX=7955 GN=mdh1ab PE=2 SV=1	3.604	1	1171.8	0	0	0	1
tr|F1Q6Z0|F1Q6Z0_DANRE	Protein Jade-3 OS=Danio rerio OX=7955 GN=jade3 PE=1 SV=1	1.635	1	113268	0	0	0	1
tr|E9QIH5|E9QIH5_DANRE	Glyceraldehyde-3-phosphate dehydrogenase (Fragment) OS=Danio rerio OX=7955 GN=gapdh PE=1 SV=6	12.97	1	34159.3	0	0	0	1
tr|Q4V9P8|Q4V9P8_DANRE	Calcium/calmodulin-dependent protein kinase (CaM kinase) II gamma 1 OS=Danio rerio OX=7955 GN=camk2g1 PE=1 SV=1	14.82	5	53025.9	0	0	0	1
tr|A0A2R8QI77|A0A2R8QI77_DANRE	Periaxin OS=Danio rerio OX=7955 GN=prx PE=4 SV=1	52.68	102	3.64894e+06	6.862	0	17158.3	0.99532
tr|A0A0R4IQN8|A0A0R4IQN8_DANRE	Nascent polypeptide-associated complex subunit alpha OS=Danio rerio OX=7955 GN=naca PE=1 SV=1	28.74	19	703483	7.573	1	14477.2	0.979836
tr|A0A0R4IMS3|A0A0R4IMS3_DANRE	60S ribosomal protein L24 OS=Danio rerio OX=7955 GN=rpl24 PE=1 SV=1	13.38	1	56667	5.096	1	1994.72	0.965996
tr|Q6NYR4|Q6NYR4_DANRE	Heat shock cognate 71 kDa protein OS=Danio rerio OX=7955 GN=hspa8 PE=1 SV=1	10.17	4	59590	7.088	0	5007.26	0.922485

## Sheet: Cavin4a proteome
Table 2: Proteins identified in embryos expressing Cavin1a-Clover and TurboID-dGBP
		Cavin4a-Clover + TurboID-dGBP			TurboID-dGBP control			Enrichment score
Accession	Name	% Coverage	Peptide (95%)	MS2Count	% Coverage	Peptide (95%)	MS2Count
tr|A0A2R8QI77|A0A2R8QI77_DANRE	Periaxin OS=Danio rerio OX=7955 GN=prx PE=4 SV=1	42.94	58	1.82494e+06	0	0	0	1
sp|A1L260|CVN4A_DANRE	Caveolae-associated protein 4a OS=Danio rerio OX=7955 GN=cavin4a PE=1 SV=1	41.03	16	745613	0	0	0	1
tr|F1R3X9|F1R3X9_DANRE	Striated muscle-enriched protein kinase b OS=Danio rerio OX=7955 GN=spegb PE=4 SV=2	5.815	9	115736	0	0	0	1
tr|Q32PN9|Q32PN9_DANRE	Gnl3 protein OS=Danio rerio OX=7955 GN=gnl3 PE=2 SV=1	18.89	7	137964	0	0	0	1
tr|E9QCS9|E9QCS9_DANRE	Nascent polypeptide-associated complex subunit alpha (Fragment) OS=Danio rerio OX=7955 GN=naca PE=1 SV=2	20.5	7	5740.65	0	0	0	1
tr|E7FDY6|E7FDY6_DANRE	EH domain-binding protein 1-like 1b OS=Danio rerio OX=7955 GN=ehbp1l1b PE=4 SV=1	2.729	3	13316	0	0	0	1
tr|A0A140LGU1|A0A140LGU1_DANRE	Heterochromatin protein 1,-binding protein 3 OS=Danio rerio OX=7955 GN=hp1bp3 PE=1 SV=2	5.246	2	6392.56	0	0	0	1
tr|B7ZCX8|B7ZCX8_DANRE	Si:dkeyp-77c8.3 (Fragment) OS=Danio rerio OX=7955 GN=si:dkeyp-77c8.3 PE=4 SV=1	13.97	1	10667.1	0	0	0	1
tr|Q4ZGL1|Q4ZGL1_DANRE	Cypher/ZASP splice variant 2 alpha OS=Danio rerio OX=7955 GN=ldb3a PE=2 SV=1	7.732	2	23579.6	0	0	0	1
tr|B8JLP0|B8JLP0_DANRE	DEAH (Asp-Glu-Ala-His) box polypeptide 37 OS=Danio rerio OX=7955 GN=dhx37 PE=1 SV=1	3.906	1	67285.4	0	0	0	1
tr|Q803P5|Q803P5_DANRE	Nop58 protein (Fragment) OS=Danio rerio OX=7955 GN=nop58 PE=2 SV=1	3.083	2	6227.31	0	0	0	1
tr|Q7T358|Q7T358_DANRE	G1 to S phase transition 1 OS=Danio rerio OX=7955 GN=gspt1l PE=1 SV=1	2.773	1	1186.1	0	0	0	1
tr|Q7SXX4|Q7SXX4_DANRE	Hippocalcin-like 1 OS=Danio rerio OX=7955 GN=hpcal1 PE=2 SV=1	10.36	2	17882.9	0	0	0	1
tr|F1R772|F1R772_DANRE	Histone-lysine N-methyltransferase SETDB1-A OS=Danio rerio OX=7955 GN=setdb1a PE=1 SV=2	0.6267	1	1884.02	0	0	0	1
tr|F1Q6N7|F1Q6N7_DANRE	Si:dkeyp-77c8.2 (Fragment) OS=Danio rerio OX=7955 GN=si:dkeyp-77c8.2 PE=4 SV=8	13.16	1	1740.88	0	0	0	1
tr|E7FEN5|E7FEN5_DANRE	ADAM metallopeptidase with thrombospondin type 1 motif, 3 OS=Danio rerio OX=7955 GN=adamts3 PE=4 SV=2	1.117	1	145.149	0	0	0	1
tr|F1QDE5|F1QDE5_DANRE	Glutamate receptor, ionotropic, N-methyl D-aspartate 2A, b OS=Danio rerio OX=7955 GN=grin2ab PE=3 SV=1	0.8304	1	85.5308	0	0	0	1
tr|Q6PC34|Q6PC34_DANRE	Hippocalcin OS=Danio rerio OX=7955 GN=hpca PE=1 SV=1	13.99	2	10135.3	0	0	0	1
tr|E7F0K3|E7F0K3_DANRE	Caveolae-associated protein 1a OS=Danio rerio OX=7955 GN=cavin1a PE=4 SV=1	2.651	1	244.868	0	0	0	1
tr|B3DJR0|B3DJR0_DANRE	Cardiomyopathy associated 5 like OS=Danio rerio OX=7955 GN=cmya5 PE=2 SV=1	0.5685	0	1476.94	0	0	0	1
tr|F1QZ50|F1QZ50_DANRE	AHNAK nucleoprotein OS=Danio rerio OX=7955 GN=ahnak PE=1 SV=2	22.36	19	1.01041e+06	1.543	3	2521.71	0.99751
tr|F1QK20|F1QK20_DANRE	Si:dkey-78l4.8 (Fragment) OS=Danio rerio OX=7955 GN=si:dkey-78l4.8 PE=3 SV=1	18.48	3	13655.6	8.696	0	296.413	0.978755

## Sheet: Cavin4b proteome
Table 3: Proteins identified in embryos expressing Cavin1a-Clover and TurboID-dGBP
		Cavin4a-Clover + TurboID-dGBP			TurboID-dGBP control			Enrichment score
Accession	Name	% Coverage	Peptide (95%)	MS2Count	% Coverage	Peptide (95%)	MS2Count
tr|F1QSU0|F1QSU0_DANRE	Caveolae-associated protein 4b OS=Danio rerio OX=7955 GN=cavin4b PE=1 SV=1	45.91	19	76814	0	0	0	1
sp|A1L260|CVN4A_DANRE	Caveolae-associated protein 4a OS=Danio rerio OX=7955 GN=cavin4a PE=1 SV=1	44.68	18	386757	0	0	0	1
tr|Q9I8V1|Q9I8V1_DANRE	Actin alpha cardiac muscle 1b OS=Danio rerio OX=7955 GN=actc1b PE=2 SV=1	17.24	8	165713	0	0	0	1
tr|F1R3X9|F1R3X9_DANRE	Striated muscle-enriched protein kinase b OS=Danio rerio OX=7955 GN=spegb PE=4 SV=2	2.287	4	40099.5	0	0	0	1
tr|Q3B7F4|Q3B7F4_DANRE	LOC563247 protein (Fragment) OS=Danio rerio OX=7955 GN=rsl1d1 PE=2 SV=1	6.145	4	15272.7	0	0	0	1
tr|A2BGW3|A2BGW3_DANRE	Calcium/calmodulin-dependent protein kinase (CaM kinase) II beta 1 OS=Danio rerio OX=7955 GN=camk2b1 PE=1 SV=1	9.871	3	1267.28	0	0	0	1
tr|B3DJR0|B3DJR0_DANRE	Cardiomyopathy associated 5 like OS=Danio rerio OX=7955 GN=cmya5 PE=2 SV=1	6.765	3	27857	0	0	0	1
tr|E7F0K3|E7F0K3_DANRE	Caveolae-associated protein 1a OS=Danio rerio OX=7955 GN=cavin1a PE=4 SV=1	9.398	2	517.172	0	0	0	1
tr|F1QRX4|F1QRX4_DANRE	Bridging integrator 1b OS=Danio rerio OX=7955 GN=bin1b PE=1 SV=1	5.495	2	1130.89	0	0	0	1
tr|Q6NV15|Q6NV15_DANRE	ATP-binding cassette, sub-family F (GCN20), member 1 OS=Danio rerio OX=7955 GN=abcf1 PE=2 SV=1	3.307	2	1590.88	0	0	0	1
tr|Q3B727|Q3B727_DANRE	Zgc:123289 OS=Danio rerio OX=7955 GN=zgc:123289 PE=2 SV=1	24.2	7	140843	0	0	0	1
tr|Q4V9P8|Q4V9P8_DANRE	Calcium/calmodulin-dependent protein kinase (CaM kinase) II gamma 1 OS=Danio rerio OX=7955 GN=camk2g1 PE=1 SV=1	9.821	3	1084.73	0	0	0	1
tr|E7FDY6|E7FDY6_DANRE	EH domain-binding protein 1-like 1b OS=Danio rerio OX=7955 GN=ehbp1l1b PE=4 SV=1	2.015	1	4361.17	0	0	0	1
tr|A2BIM6|A2BIM6_DANRE	Small ArfGAP 1 OS=Danio rerio OX=7955 GN=smap1 PE=1 SV=1	6.418	2	130.666	0	0	0	1
tr|X1WF58|X1WF58_DANRE	SUMO-specific peptidase 6b OS=Danio rerio OX=7955 GN=senp6b PE=4 SV=1	1.611	1	51.3879	0	0	0	1
tr|Q7ZUT3|Q7ZUT3_DANRE	Dkc1 protein (Fragment) OS=Danio rerio OX=7955 GN=dkc1 PE=2 SV=1	4.427	1	68.1818	0	0	0	1
tr|Q7T358|Q7T358_DANRE	G1 to S phase transition 1 OS=Danio rerio OX=7955 GN=gspt1l PE=1 SV=1	2.773	1	198.098	0	0	0	1
tr|Q6DI34|Q6DI34_DANRE	Lamin B receptor OS=Danio rerio OX=7955 GN=lbr PE=2 SV=1	1.454	1	46.5896	0	0	0	1
tr|Q6DBQ9|Q6DBQ9_DANRE	Zgc:91999 OS=Danio rerio OX=7955 GN=zgc:91999 PE=2 SV=1	2.828	1	3517.02	0	0	0	1
tr|F1R772|F1R772_DANRE	Histone-lysine N-methyltransferase SETDB1-A OS=Danio rerio OX=7955 GN=setdb1a PE=1 SV=2	0.6267	1	214.333	0	0	0	1
tr|B7ZCX8|B7ZCX8_DANRE	Si:dkeyp-77c8.3 (Fragment) OS=Danio rerio OX=7955 GN=si:dkeyp-77c8.3 PE=4 SV=1	5.587	1	2826.63	0	0	0	1
tr|G1K2X0|G1K2X0_DANRE	Titin, tandem duplicate 1 OS=Danio rerio OX=7955 GN=ttn.1 PE=1 SV=2	0.1681	1	3079.95	0	0	0	1
tr|A0A0R4IE10|A0A0R4IE10_DANRE	Elongation factor 1-alpha OS=Danio rerio OX=7955 GN=eef1a1l2 PE=1 SV=2	11.9	2	43373.2	9.524	1	269.472	0.993825
tr|A0A2R8QI77|A0A2R8QI77_DANRE	Periaxin OS=Danio rerio OX=7955 GN=prx PE=4 SV=1	31.12	36	1.08732e+06	5.933	1	41280.5	0.963423
tr|A9JR97|A9JR97_DANRE	LOC792623 protein (Fragment) OS=Danio rerio OX=7955 GN=dusp27 PE=2 SV=1	1.906	1	5012.27	5.808	2	423.158	0.922148

## Sheet: Heatmap
Table 4: Enriched proteins in each cavin samples.
ProtScore is the protein score generated by ProteinPilot based on the number and confidence of peptides detected in sample.
N: nucleus; C: cytoplasm; CS: cytoskeleton; PM: Plasma membrane; E: endosome; TT: T-tubule; SR: Sarcoplasmic reticulumn; J-SR: Junctional Sarcoplasmic reticulumn; ZL: Z-line; M: mitochondrion
Uniport	Gene	Protein	MS2Count			Subcellular localisation	Cellular Function	Associated Disease	Reference (DOI or PMID)
			Cavin1a	Cavin4a	Cavin4b
A1L260	cavin4a	Caveolae-associated protein 4a	1.96983e+06	745613	386757	PM, TT	Induces rhoa activation and activates nppa transcription and myofibrillar organization through the rho/rock signaling pathway		10.1128/MCB.02186-07
B8A4X7	limch1a	LIM and calponin homology domains 1a	243361	0	0	CS	stress fibre assembly and focal adhesion assembly		10.1091/mbc.E15-04-0218
E7F0K3	cavin1a	Caveolae-associated protein 1a	4.33385e+06	244.868	517.172	PM	Caveolae formation		10.1016/j.cell.2007.11.042
F1R0H8	dmd	Dystrophin	80125.4	0	0	PM; CS	sarcomere organization; skeletal muscle organ development	Duchenne muscular dystrophy; Becker muscular dystrophy; dilated cardiomyopathy	10.1016/j.cell.2008.10.018; 10.1002/ana.410440619
A2BGW3	camk2b1	Calcium/calmodulin-dependent protein kinase (CaM kinase) II beta 1	201583	0	1267.28	C, N, PM	calcium/calmodulin-dependent protein kinase		10.1113/jphysiol.2006.111757; 10.1016/j.ceca.2011.02.007
F1QWM2	dusp27	Inactive dual specificity phosphatase 27	59185.8	0	0	C	involved in skeletal myofibril assembly		10.1242/dmm.013235
Q9I8V0	pvalb2	Parvalbumin-2	52924.6	0	0	C, N	involved in relaxation after contraction in muscle		10.1016/j.cbpa.2007.03.020
F1QNB1	ank3a	Ankyrin 3a	142782	0	0	PM; TT; CS; Golgi	required for costamere localization of DMD and betaDAG1		10.1016/j.cell.2008.10.018; 10.1083/jcb.201205118
Q7T358	gspt1l	G1 to S phase transition 1	25914.1	1186.1	198.098	C	GTPase activity and translation termination activity		PMC402068; 10.1016/j.molcel.2013.12.028
F1R446	sptan1	Spectrin alpha, non-erythrocytic 1	10778.1	0	0	CS; PM	Binds to ankyrin and regulate plasma membrane organisation		10.1074/jbc.M406018200
F1QSU0	cavin4b	Caveolae-associated protein 4b	69183.4	0	76814	PM, TT	Skeletal muscle development, T-tubule organisation		10.1371/journal.pgen.1006099
E7FDY6	ehbp1l1b	EH domain-binding protein 1-like 1b	19764.9	13316	4361.17	E	Rab effector, vesicle trafficking		10.1083/jcb.201508086
B3DJR0	cmya5	Cardiomyopathy associated 5 like	5245.53	1476.94	27857	N; J-SR	subcellular compartmentation of protein kinase A, modulating skeletal muscle regeneration	Duchenne muscular dystrophy; hypertrophic cardiomyopathy	10.1038/s41598-017-06395-6; 10.1096/fj.10-169219
A0A2R8RS96	palm2	Paralemmin 2	3428.86	0	0	PM	involved in regulation of cell shape		10.1371/journal.pone.0041850
Q68EH0	gspt1	G1 to S phase transition 1	18340	0	0	C	GTPase activity and translation termination activity		PMC402068; 10.1016/j.molcel.2013.12.028
Q1LUT2	top2b	DNA topoisomerase 2	6101.5	0	0	N	DNA topoisomerase		10.3390/ijms19092765
Q7ZV18	stx4	Placental syntaxin 4A	5702.11	0	0	PM	involved in intracellular protein transport		10.1242/jcs.032847; 10.1074/jbc.272.10.6179
A0JMC2	myhz2	Myhz2 protein (Fragment)	199743	0	0	CS	Muscle contraction		10.1159/000351293
Q7ZSY2	mdh1ab	Malate dehydrogenase	1171.8	0	0	C	involved in carbohydrate metabolic process		10.1038/onc.2017.36
F1Q6Z0	jade3	Protein Jade-3	113268	0	0	N	regulation of histone acetylation during transcription	cancer	10.1016/j.canlet.2018.04.012; 10.1016/j.molcel.2005.12.007
E9QIH5	gapdh	Glyceraldehyde-3-phosphate dehydrogenase (Fragment)	34159.3	0	0	C, CS	Involved in glycolysis and assembly of cytoskeleton	Alzheimer's disease	10.1042/BJ20040622
Q4V9P8	camk2g1	Calcium/calmodulin-dependent protein kinase (CaM kinase) II gamma 1	53025.9	0	1084.73	C, N, PM	calcium/calmodulin-dependent protein kinase		10.1113/jphysiol.2005.097154
A0A2R8QI77	prx	Periaxin	3.64894e+06	1.82494e+06	1.08732e+06	PM, N	Scaffolding protein of dystroglycan complex	Charcot-Marie-Tooth disease	10.1016/s0896-6273(01)00327-0; 10.1007/s10048-012-0338-5
A0A0R4IQN8	naca	Nascent polypeptide-associated complex subunit alpha	703483	5740.65	0	N	Transcriptional coactivator involved in muscle fiber development		10.1128/MCB.18.3.1303; 10.1101/gad.10.14.1763
A0A0R4IMS3	rpl24	60S ribosomal protein L24	56667	0	0	C	Structural constituent of ribosome		10.1093/bib/bbr042
Q6NYR4	hspa8	Heat shock cognate 71 kDa protein	59590	0	0	C, PM, N, M	protein chaperone		10.1007/s12192-016-0676-6
F1R3X9	spegb	Striated muscle-enriched protein kinase b	0	115736	40099.5	PM, N, C	Striated muscle-enriched protein kinase	CNM5	10.1016/j.ajhg.2014.07.004; 10.1093/hmg/ddy068
Q32PN9	gnl3	Gnl3 protein	0	137964	0	N	maintain the proliferative capacity of stem cells		10.1101/gad.55671
A0A140LGU1	hp1bp3	Heterochromatin protein 1,-binding protein 3	0	6392.56	0	N	heterochromatin organization		10.1074/mcp.M113.034975; 10.1074/mcp.M114.038232
B7ZCX8	si:dkeyp-77c8.3	Si:dkeyp-77c8.3 (Fragment)	0	10667.1	2826.63	PM, SR, ZL, NE	transmission of mechanical forces, highly expressed in skeletal and cardiac muscle	laminopathies; Emery-Dreifuss muscular dystrophy	10.1038/cr.2012.126; 10.1042/BST20170149; 10.1242/jcs.01642; 10.1093/hmg/ddm238
Q4ZGL1	ldb3a	Cypher/ZASP splice variant 2 alpha	0	23579.6	0	CS, N, C, ZL	adapter in striated muscle to couple protein kinase C-mediated signalling	dilated cardiomyopathy; distal myopathy; and myofibrillar myopathy 4	10.1083/jcb.146.2.465; 10.1074/jbc.M311849200; 10.1074/jbc.274.28.19807
B8JLP0	dhx37	DEAH (Asp-Glu-Ala-His) box polypeptide 37	0	67285.4	0	N	release of the U3 snoRNP from pre-ribosomal particles	46,XY gonadal dysgenesis	10.1038/s41436-019-0606-y
Q803P5	nop58	Nop58 protein	0	6227.31	0	N	60S ribosomal subunit biogenesis		10.1016/j.molcel.2004.11.012; 10.1128/MCB.01097-07
Q7SXX4	hpcal1	Hippocalcin-like 1	0	17882.9	0	PM, C	regulation of voltage-dependent calcium channels	torsion dystonia 2	10.1093/hmg/ddx133; 10.1016/j.bbrc.2004.07.123
F1R772	setdb1a	Histone-lysine N-methyltransferase SETDB1-A	0	1884.02	214.333	N	Histone methyltransferase		10.1038/ncb1647; 10.1016/j.celrep.2016.09.050
F1Q6N7	si:dkeyp-77c8.2	Si:dkeyp-77c8.2 (Fragment)	0	1740.88	0	PM; SR; ZL; NE	highly expressed in skeletal and cardiac muscles; transmission of mechanical forces across the nuclear envelope and in nuclear movement and positioning; maintaining subcellular spatial organisation	laminopathies; Emery-Dreifuss muscular dystrophy; dilated cardiomyopathy	10.1038/cr.2012.126; 10.1242/jcs.01642; 10.1042/BST20170149
E7FEN5	adamts3	ADAM metallopeptidase with thrombospondin type 1 motif, 3	0	145.149	0			Hennekam lymphangiectasia-lymphedema syndrome 3	10.1093/hmg/ddx297
F1QDE5	grin2ab	Glutamate receptor, ionotropic, N-methyl D-aspartate 2A, b	0	85.5308	0	PM	regulation of postsynaptic membrane potential	Huntington's disease; bipolar disorder; and schizophrenia	8768735; 10.1056/NEJMoa1206524
Q6PC34	hpca	Hippocalcin	0	10135.3	0	PM, C	regulation of voltage-dependent calcium channels	torsion dystonia 2	10.1093/hmg/ddx133; 10.1016/j.bbrc.2004.07.123
F1QZ50	ahnak	AHNAK nucleoprotein	0	1.01041e+06	0	PM; N; C	Predicted to be involved in regulation of RNA splicing; interacts with dysferlin; dysferlin and AHNAK colocalize at the sarcolemmal membrane and T-tubules		10.1096/fj.06-6628com; 10.1177/002215540305100309
F1QK20	si:dkey-78l4.8	Si:dkey-78l4.8 (Fragment)	0	13655.6	0		Predicted to be involved in proteolysis
Q9I8V1	actc1b	Actin alpha cardiac muscle 1b	0	0	165713	CS	Cell motility	Dilated cardiomyopathy; hypertrophic cardiomyopathy 11	10.1126/science.280.5364.750; 10.1056/NEJMoa075463
Q3B7F4	rsl1d1	LOC563247 protein (Fragment)	0	0	15272.7	N	a pro-apoptotic regulator in response to DNA damage		10.1038/cddis.2012.22; 10.1128/MCB.00142-08
F1QRX4	bin1b	Bridging integrator 1b	0	0	1130.89	PM, TT	T-tubules biogenesis in muscle cells	breast carcinoma; CNM2; prostate adenocarcinoma	10.1038/ng0996-69
Q6NV15	abcf1	ATP-binding cassette, sub-family F (GCN20), member 1	0	0	1590.88	N	Regulation of translation		10.1074/jbc.M109.031625
Q3B727	zgc:123289	actin (homolog)	0	0	140843	CS
A2BIM6	smap1	Small ArfGAP 1	0	0	130.666	PM;	regulation of clathrin-dependent endocytosis		10.1091/mbc.e04-08-0683
X1WF58	senp6b	SUMO-specific peptidase 6b	0	0	51.3879	N	Protein desumoylation		10.1083/jcb.200909008; 10.1091/mbc.E10-06-0504
Q7ZUT3	dkc1	Dkc1 protein (Fragment)	0	0	68.1818	N; C	ribosome biogenesis and telomere maintenance	X-linked dyskeratosis congenita; aplastic anemia; dyskeratosis congenita	10.1093/hmg/8.13.2515; 10.1038/990141; 10.1126/science.1165357; 10.1016/j.bbagen.2011.07.012
Q6DI34	lbr	Lamin B receptor	0	0	46.5896	N	Involved in cholesterol biosynthesis	Greenberg dysplasia; Pelger-Huet anomaly; and primary biliary cholangitis.	8157663; 8157662; 10.1016/s0005-2760(98)00041-1; 10.1086/373938; 10.7554/eLife.16011
Q6DBQ9	zgc:91999	Pacsin3 (homolog)	0	0	3517.02	PM; E	Pacsin3 homolog, involved in cytoskeleton organization; plasma membrane tubulation; and regulation of endocytosis.		10.1242/jcs.01290; 10.1074/jbc.M112.358960
G1K2X0	ttn.1	Titin, tandem duplicate 1	0	0	3079.95	PM	Involved in myofibril assembly and skeletal muscle tissue development		10.1038/27603
A0A0R4IE10	eef1a1l2	Elongation factor 1-alpha	0	0	43373.2	PM; N	Predicted to be involved in translational elongation		10.1111/j.1365-2249.2006.03249.x
A9JR97	dusp27	LOC792623 protein (Fragment)	0	0	5012.27	C	involved in skeletal myofibril assembly		10.1242/dmm.013235
