# Supplementary material for: In vivo proteomic mapping through GFP-directed proximity-dependent biotin labelling in zebrafish
Source: eLife. 2021 Feb 16;10:e64631. doi: 10.7554/eLife.64631 (PMC7906605; doi:10.7554/eLife.64631)
Supplement: Supplementary file 2. [file elife-64631-supp2.xlsx]

## Sheet: Summary
Table	Tab name	Description	Note
Table 1	Cavin1a	Peptides identified in embryos expressing Cavin1a-Clover and TurboID-dGBP	Caveolin peptides were listed at row 62942, 62943 and 63192 (highlight in green)
Table 2	Control	Peptides identified in embryos expressing only TurboID-dGBP	No Caveolin peptide was identified

## Sheet: Cavin1a
N	Unused	Total	%Cov	%Cov(50)	%Cov(95)	Accessions	Names	Used	Annotation	Contrib	Conf	Sequence	Modifications	ProteinModifications	Cleavages	dMass	Obs MW	Obs m/z	Theor MW	Theor m/z	Theor z	Sc	Spectrum	Acq Time	Intensity (Peptide)	PrecursorIntensityAcquisition	Apex Time (Peptide)	Elution Peak Width (Peptide)	MS2Counts
1	194.25	194.25	79.32	49.37	47.18	tr|A0A2R8QI77|A0A2R8QI77_DANRE	Periaxin OS=Danio rerio OX=7955 GN=prx PE=4 SV=1			2	99	ADLQAPK				-0.00226591	741.4	371.707	741.402	371.708	2	11	1.1.1.2817.2	15.1389	177.94	174.92	15.19	0.57	2334.46
1	194.25	194.25	79.32	49.37	47.18	tr|A0A2R8QI77|A0A2R8QI77_DANRE	Periaxin OS=Danio rerio OX=7955 GN=prx PE=4 SV=1			2	99	AEANAPNLEVGGK				0.00164541	1268.64	635.326	1268.64	635.325	2	14	1.1.1.2874.29	18.4494	1419.6	570.83	18.17	0.4	2188.17
1	194.25	194.25	79.32	49.37	47.18	tr|A0A2R8QI77|A0A2R8QI77_DANRE	Periaxin OS=Danio rerio OX=7955 GN=prx PE=4 SV=1			2	99	AEDGRPSSGSSFDVPEVSLK				-0.00269374	2062.98	688.667	2062.98	688.668	3	17	1.1.1.3021.20	26.9088	827.67	484.56	26.58	0.75	1929.38
1	194.25	194.25	79.32	49.37	47.18	tr|A0A2R8QI77|A0A2R8QI77_DANRE	Periaxin OS=Danio rerio OX=7955 GN=prx PE=4 SV=1			2	99	AEGDVVVETHGGQGGK				0.00178137	1538.73	513.919	1538.73	513.918	3	18	1.1.1.2822.10	15.4507	1351.41	913.13	15.54	0.4	10357
1	194.25	194.25	79.32	49.37	47.18	tr|A0A2R8QI77|A0A2R8QI77_DANRE	Periaxin OS=Danio rerio OX=7955 GN=prx PE=4 SV=1			2	99	AELDIEGLHGR				0.00203359	1208.62	403.88	1208.61	403.879	3	14	1.1.1.2936.4	21.9665	452.02	428.01	21.9	0.63	5682.87
1	194.25	194.25	79.32	49.37	47.18	tr|A0A2R8QI77|A0A2R8QI77_DANRE	Periaxin OS=Danio rerio OX=7955 GN=prx PE=4 SV=1			2	99	AFGAEINTEDPNIK				-0.00277563	1517.73	759.874	1517.74	759.875	2	20	1.1.1.2957.29	23.2199	711.5	684.03	23.17	0.69	2129.79
1	194.25	194.25	79.32	49.37	47.18	tr|A0A2R8QI77|A0A2R8QI77_DANRE	Periaxin OS=Danio rerio OX=7955 GN=prx PE=4 SV=1			2	99	DEEVQEIGTLVSSK				-0.00271322	1532.75	767.384	1532.76	767.386	2	22	1.1.1.3054.27	28.822	533.78	466.44	28.71	0.75	2106.84
1	194.25	194.25	79.32	49.37	47.18	tr|A0A2R8QI77|A0A2R8QI77_DANRE	Periaxin OS=Danio rerio OX=7955 GN=prx PE=4 SV=1			2	99	FDISMPK	Oxidation(M)@5			-0.000706102	852.404	427.209	852.405	427.21	2	10	1.1.1.2885.6	19.0428	726.28	658.61	18.98	0.85	5104.19
1	194.25	194.25	79.32	49.37	47.18	tr|A0A2R8QI77|A0A2R8QI77_DANRE	Periaxin OS=Danio rerio OX=7955 GN=prx PE=4 SV=1			2	99	FDPSLPK				-0.00217558	802.42	402.217	802.422	402.219	2	9	1.1.1.2899.6	19.8378	534.79	518.9	19.83	1.67	5936.02
1	194.25	194.25	79.32	49.37	47.18	tr|A0A2R8QI77|A0A2R8QI77_DANRE	Periaxin OS=Danio rerio OX=7955 GN=prx PE=4 SV=1			2	99	FDVSLPK				-0.00166514	804.436	403.226	804.438	403.226	2	10	1.1.1.2999.3	25.6014	406.69	371.44	25.65	0.69	3064
1	194.25	194.25	79.32	49.37	47.18	tr|A0A2R8QI77|A0A2R8QI77_DANRE	Periaxin OS=Danio rerio OX=7955 GN=prx PE=4 SV=1			2	99	FDVSMPK				0.00388303	822.398	412.207	822.395	412.205	2	10	1.1.1.2931.5	21.6795	620.34	599.2	21.78	0.92	5974.61
1	194.25	194.25	79.32	49.37	47.18	tr|A0A2R8QI77|A0A2R8QI77_DANRE	Periaxin OS=Danio rerio OX=7955 GN=prx PE=4 SV=1			2	99	FEMPNLDVSLPK				-0.00131287	1388.7	695.357	1388.7	695.358	2	14	1.1.1.3202.12	37.3607	581.03	426.93	37.22	1.16	3114.59
1	194.25	194.25	79.32	49.37	47.18	tr|A0A2R8QI77|A0A2R8QI77_DANRE	Periaxin OS=Danio rerio OX=7955 GN=prx PE=4 SV=1			2	99	FHKPNISISLPK				0.00173772	1379.79	460.939	1379.79	460.938	3	11	1.1.1.2998.9	25.5537	586.44	528.54	25.42	0.69	3067.2
1	194.25	194.25	79.32	49.37	47.18	tr|A0A2R8QI77|A0A2R8QI77_DANRE	Periaxin OS=Danio rerio OX=7955 GN=prx PE=4 SV=1			2	99	FHMPSIDISLPGGR	Oxidation(M)@3			-0.00741645	1541.76	514.927	1541.77	514.929	3	14	1.1.1.3071.9	29.7711	515.95	484.04	29.81	1.45	2476.13
1	194.25	194.25	79.32	49.37	47.18	tr|A0A2R8QI77|A0A2R8QI77_DANRE	Periaxin OS=Danio rerio OX=7955 GN=prx PE=4 SV=1			2	99	FHMPSIDISLPK	Oxidation(M)@3			-0.00499751	1399.71	467.578	1399.72	467.58	3	13	1.1.1.3071.5	29.7644	312.51	256.47	29.58	1.33	1910.54
1	194.25	194.25	79.32	49.37	47.18	tr|A0A2R8QI77|A0A2R8QI77_DANRE	Periaxin OS=Danio rerio OX=7955 GN=prx PE=4 SV=1			2	99	FHMPSLDISLPGGGAESDVDVAGHGGK				-0.00397903	2649.25	663.319	2649.25	663.32	4	17	1.1.1.3190.8	36.6709	309.44	254.08	36.47	1.68	1884.79
1	194.25	194.25	79.32	49.37	47.18	tr|A0A2R8QI77|A0A2R8QI77_DANRE	Periaxin OS=Danio rerio OX=7955 GN=prx PE=4 SV=1			2	99	FHMPSLDISLPGGK	Oxidation(M)@3			0.00290651	1513.76	505.595	1513.76	505.594	3	14	1.1.1.3083.9	30.4651	1340.9	492.6	29.76	1.16	2310.36
1	194.25	194.25	79.32	49.37	47.18	tr|A0A2R8QI77|A0A2R8QI77_DANRE	Periaxin OS=Danio rerio OX=7955 GN=prx PE=4 SV=1			2	99	FHMPSLDISLPR	Oxidation(M)@3			-0.00241604	1427.72	476.914	1427.72	476.915	3	15	1.1.1.3086.4	30.6302	990.28	864.69	30.45	0.87	3998.81
1	194.25	194.25	79.32	49.37	47.18	tr|A0A2R8QI77|A0A2R8QI77_DANRE	Periaxin OS=Danio rerio OX=7955 GN=prx PE=4 SV=1			2	99	FHMPSLDISPQR				-0.00383844	1426.7	476.574	1426.7	476.575	3	12	1.1.1.3088.5	30.7477	328.67	258.88	30.51	1.16	3674.08
1	194.25	194.25	79.32	49.37	47.18	tr|A0A2R8QI77|A0A2R8QI77_DANRE	Periaxin OS=Danio rerio OX=7955 GN=prx PE=4 SV=1			2	99	FHMPSVDISLPGGK	Oxidation(M)@3			-0.00130906	1499.74	500.922	1499.74	500.922	3	14	1.1.1.3021.10	26.8838	507.26	497.9	26.98	1.21	2485.72
1	194.25	194.25	79.32	49.37	47.18	tr|A0A2R8QI77|A0A2R8QI77_DANRE	Periaxin OS=Danio rerio OX=7955 GN=prx PE=4 SV=1			2	99	FHMPSVDISLPGGR	Oxidation(M)@3			0.00290515	1527.75	510.258	1527.75	510.257	3	14	1.1.1.3049.8	28.498	1780.21	552.41	27.39	0.87	2329.35
1	194.25	194.25	79.32	49.37	47.18	tr|A0A2R8QI77|A0A2R8QI77_DANRE	Periaxin OS=Danio rerio OX=7955 GN=prx PE=4 SV=1			2	99	FHMPSVDISLPK	Oxidation(M)@3			0.000282327	1385.7	462.908	1385.7	462.908	3	15	1.1.1.3014.9	26.4775	997.46	470	26.98	1.1	2928.53
1	194.25	194.25	79.32	49.37	47.18	tr|A0A2R8QI77|A0A2R8QI77_DANRE	Periaxin OS=Danio rerio OX=7955 GN=prx PE=4 SV=1			2	99	FHMPSVDISLPR	Oxidation(M)@3			0.00195688	1413.71	472.244	1413.71	472.243	3	13	1.1.1.3047.8	28.3824	1080.28	410.53	27.5	0.98	2791.44
1	194.25	194.25	79.32	49.37	47.18	tr|A0A2R8QI77|A0A2R8QI77_DANRE	Periaxin OS=Danio rerio OX=7955 GN=prx PE=4 SV=1			2	99	FHMPSVDISPSK	Oxidation(M)@3			0.000105332	1359.65	454.224	1359.65	454.224	3	11	1.1.1.2898.10	19.7873	312.03	210.27	20	1.09	2365.95
1	194.25	194.25	79.32	49.37	47.18	tr|A0A2R8QI77|A0A2R8QI77_DANRE	Periaxin OS=Danio rerio OX=7955 GN=prx PE=4 SV=1			2	99	FHMPSVDISQPGGGAK				0.0035462	1626.79	543.269	1626.78	543.268	3	12	1.1.1.3024.10	27.057	430.31	417.97	27.15	0.81	2778.28
1	194.25	194.25	79.32	49.37	47.18	tr|A0A2R8QI77|A0A2R8QI77_DANRE	Periaxin OS=Danio rerio OX=7955 GN=prx PE=4 SV=1			2	99	FKPSGADVNLEGPDIK				0.000710438	1685.86	562.962	1685.86	562.961	3	17	1.1.1.2959.19	23.3185	1350.44	866.66	23.46	0.75	3435.77
1	194.25	194.25	79.32	49.37	47.18	tr|A0A2R8QI77|A0A2R8QI77_DANRE	Periaxin OS=Danio rerio OX=7955 GN=prx PE=4 SV=1			2	99	FKPSGADVNVEGPDIK				0.000558622	1671.85	558.29	1671.85	558.29	3	13	1.1.1.2943.20	22.3973	3679.34	676.27	21.5	0.52	3793.95
1	194.25	194.25	79.32	49.37	47.18	tr|A0A2R8QI77|A0A2R8QI77_DANRE	Periaxin OS=Danio rerio OX=7955 GN=prx PE=4 SV=1			2	99	FKPSGADVNVK				-0.00588998	1160.61	387.878	1160.62	387.88	3	16	1.1.1.2841.7	16.5147	464.73	344.38	16.62	0.29	5640.88
1	194.25	194.25	79.32	49.37	47.18	tr|A0A2R8QI77|A0A2R8QI77_DANRE	Periaxin OS=Danio rerio OX=7955 GN=prx PE=4 SV=1			2	99	FNIPSVDISLPK				-0.00292191	1328.73	665.373	1328.73	665.374	2	13	1.1.1.3204.6	37.4747	657.37	473.62	37.22	0.98	2278.8
1	194.25	194.25	79.32	49.37	47.18	tr|A0A2R8QI77|A0A2R8QI77_DANRE	Periaxin OS=Danio rerio OX=7955 GN=prx PE=4 SV=1			2	99	FNMPSIDISLPR	Oxidation(M)@3			-0.00930878	1404.7	703.356	1404.71	703.361	2	14	1.1.1.3118.19	32.5102	730.42	651.71	32.36	1.91	3291.47
1	194.25	194.25	79.32	49.37	47.18	tr|A0A2R8QI77|A0A2R8QI77_DANRE	Periaxin OS=Danio rerio OX=7955 GN=prx PE=4 SV=1			2	99	FNMPSVDISLPGGK	Oxidation(M)@3			-0.00243025	1476.73	739.37	1476.73	739.371	2	16	1.1.1.3060.26	29.1635	381.11	375.83	29.18	1.68	1898.75
1	194.25	194.25	79.32	49.37	47.18	tr|A0A2R8QI77|A0A2R8QI77_DANRE	Periaxin OS=Danio rerio OX=7955 GN=prx PE=4 SV=1			2	99	GDQLLSAR				-0.00387654	858.452	430.233	858.456	430.235	2	11	1.1.1.2854.6	17.2581	509	485.55	17.25	1.55	5533.14
1	194.25	194.25	79.32	49.37	47.18	tr|A0A2R8QI77|A0A2R8QI77_DANRE	Periaxin OS=Danio rerio OX=7955 GN=prx PE=4 SV=1			2	99	GENSHMPTIDISLPK				0.00340149	1637.81	546.944	1637.81	546.943	3	13	1.1.1.3075.10	30.0041	354.24	315.79	30.04	1.1	2109.7
1	194.25	194.25	79.32	49.37	47.18	tr|A0A2R8QI77|A0A2R8QI77_DANRE	Periaxin OS=Danio rerio OX=7955 GN=prx PE=4 SV=1			2	99	GGAEGDVDVEGHGGK				0.00188547	1382.61	461.877	1382.61	461.876	3	16	1.1.1.2813.6	14.9169	1749.71	629.45	15.13	0.4	2544.44
1	194.25	194.25	79.32	49.37	47.18	tr|A0A2R8QI77|A0A2R8QI77_DANRE	Periaxin OS=Danio rerio OX=7955 GN=prx PE=4 SV=1			2	99	GGAEGDVDVEGYGGK				0.00321029	1408.61	705.314	1408.61	705.313	2	19	1.1.1.2877.31	18.6257	417.98	415.91	18.63	0.69	1851.55
1	194.25	194.25	79.32	49.37	47.18	tr|A0A2R8QI77|A0A2R8QI77_DANRE	Periaxin OS=Danio rerio OX=7955 GN=prx PE=4 SV=1			2	99	GGAEGDVDVK				0.00347799	945.444	473.729	945.44	473.727	2	11	1.1.1.2825.6	15.6024	275.47	268.68	15.59	0.68	1289.36
1	194.25	194.25	79.32	49.37	47.18	tr|A0A2R8QI77|A0A2R8QI77_DANRE	Periaxin OS=Danio rerio OX=7955 GN=prx PE=4 SV=1			2	99	GGAESDVDVAGHGGK				0.00403278	1354.62	452.546	1354.61	452.544	3	22	1.1.1.2816.6	15.0968	558.18	488.83	15.14	0.34	3499.72
1	194.25	194.25	79.32	49.37	47.18	tr|A0A2R8QI77|A0A2R8QI77_DANRE	Periaxin OS=Danio rerio OX=7955 GN=prx PE=4 SV=1			2	99	GGAGADVDVK				0.00223846	887.437	444.726	887.435	444.725	2	14	1.1.1.2811.5	14.8008	245.24	180.37	15.25	0.86	2034.7
1	194.25	194.25	79.32	49.37	47.18	tr|A0A2R8QI77|A0A2R8QI77_DANRE	Periaxin OS=Danio rerio OX=7955 GN=prx PE=4 SV=1			2	99	GGAGGDVDVEGHGGK				0.000979805	1310.59	437.869	1310.59	437.869	3	17	1.1.1.2814.5	14.9858	339.32	227.82	14.62	0.8	3571.96
1	194.25	194.25	79.32	49.37	47.18	tr|A0A2R8QI77|A0A2R8QI77_DANRE	Periaxin OS=Danio rerio OX=7955 GN=prx PE=4 SV=1			2	99	GGNFEMPK	Oxidation(M)@6			-0.00702805	894.383	448.199	894.391	448.203	2	8	1.1.1.2826.5	15.6572	106.19	98.46	15.48	0.63	1019.73
1	194.25	194.25	79.32	49.37	47.18	tr|A0A2R8QI77|A0A2R8QI77_DANRE	Periaxin OS=Danio rerio OX=7955 GN=prx PE=4 SV=1			2	99	GGQFEMPK	Oxidation(M)@6			0.00115572	908.407	455.211	908.406	455.21	2	11	1.1.1.2833.6	16.0559	471.66	323.58	15.82	1.43	1908.04
1	194.25	194.25	79.32	49.37	47.18	tr|A0A2R8QI77|A0A2R8QI77_DANRE	Periaxin OS=Danio rerio OX=7955 GN=prx PE=4 SV=1			2	99	GHSIPVDSEVEYEGPR				-0.000117981	1769.82	590.948	1769.82	590.948	3	18	1.1.1.2938.25	22.1171	765.07	641	22.02	0.52	4833.74
1	194.25	194.25	79.32	49.37	47.18	tr|A0A2R8QI77|A0A2R8QI77_DANRE	Periaxin OS=Danio rerio OX=7955 GN=prx PE=4 SV=1			2	99	HEISLPK				-0.00516237	822.455	412.235	822.46	412.237	2	10	1.1.1.2847.7	16.8596	526.08	424.88	16.73	0.86	4581.59
1	194.25	194.25	79.32	49.37	47.18	tr|A0A2R8QI77|A0A2R8QI77_DANRE	Periaxin OS=Danio rerio OX=7955 GN=prx PE=4 SV=1			2	99	IDLAFPK				0.00262452	802.461	402.238	802.459	402.237	2	10	1.1.1.3002.4	25.7762	521	238.45	26.17	1.1	2289.26
1	194.25	194.25	79.32	49.37	47.18	tr|A0A2R8QI77|A0A2R8QI77_DANRE	Periaxin OS=Danio rerio OX=7955 GN=prx PE=4 SV=1			2	99	INLDVSDPK				-0.00172826	999.522	500.768	999.524	500.769	2	14	1.1.1.2903.16	20.0841	774.11	647.35	19.88	1.26	3080.5
1	194.25	194.25	79.32	49.37	47.18	tr|A0A2R8QI77|A0A2R8QI77_DANRE	Periaxin OS=Danio rerio OX=7955 GN=prx PE=4 SV=1			2	99	INVEGPDIK				-0.00166384	983.527	492.771	983.529	492.772	2	13	1.1.1.2885.11	19.0512	836.93	797.24	18.98	0.57	4515.22
1	194.25	194.25	79.32	49.37	47.18	tr|A0A2R8QI77|A0A2R8QI77_DANRE	Periaxin OS=Danio rerio OX=7955 GN=prx PE=4 SV=1			2	99	LDISLPK				-0.000365648	784.469	393.242	784.469	393.242	2	8	1.1.1.3021.2	26.8705	322.5	204.78	26.11	1.56	2092
1	194.25	194.25	79.32	49.37	47.18	tr|A0A2R8QI77|A0A2R8QI77_DANRE	Periaxin OS=Danio rerio OX=7955 GN=prx PE=4 SV=1			2	99	LDVSLPK			cleaved H-L@N-term	0.00149518	770.455	386.235	770.454	386.234	2	10	1.1.1.2977.2	24.3296	745.09	701.35	24.27	0.4	5570.88
1	194.25	194.25	79.32	49.37	47.18	tr|A0A2R8QI77|A0A2R8QI77_DANRE	Periaxin OS=Danio rerio OX=7955 GN=prx PE=4 SV=1			2	99	LEFFSPYSK				-0.000161436	1116.55	559.282	1116.55	559.282	2	10	1.1.1.3058.9	29.0196	569.72	390.55	28.77	1.5	1859.46
1	194.25	194.25	79.32	49.37	47.18	tr|A0A2R8QI77|A0A2R8QI77_DANRE	Periaxin OS=Danio rerio OX=7955 GN=prx PE=4 SV=1			2	99	LKPAGGEINIEGPDIESGK				-0.0011328	1922.99	642.005	1922.99	642.006	3	16	1.1.1.2983.26	24.7163	1219.9	389.21	24.04	0.52	1833.65
1	194.25	194.25	79.32	49.37	47.18	tr|A0A2R8QI77|A0A2R8QI77_DANRE	Periaxin OS=Danio rerio OX=7955 GN=prx PE=4 SV=1			2	99	LKPSEAEVNIEGPDIK				0.00148021	1737.92	580.313	1737.91	580.312	3	14	1.1.1.2952.26	22.9264	862.24	719.8	22.82	0.63	3177.28
1	194.25	194.25	79.32	49.37	47.18	tr|A0A2R8QI77|A0A2R8QI77_DANRE	Periaxin OS=Danio rerio OX=7955 GN=prx PE=4 SV=1			2	99	LKPSGGEINIEGPDIESGK				-0.00307416	1938.99	647.336	1938.99	647.337	3	15	1.1.1.2984.26	24.7739	1883.37	289.19	23.4	0.52	1841.05
1	194.25	194.25	79.32	49.37	47.18	tr|A0A2R8QI77|A0A2R8QI77_DANRE	Periaxin OS=Danio rerio OX=7955 GN=prx PE=4 SV=1			2	99	LKPSGGEINIEGPDIK				-0.00226052	1665.89	556.304	1665.89	556.305	3	12	1.1.1.3001.16	25.7384	285.74	262.88	25.83	0.87	2161.19
1	194.25	194.25	79.32	49.37	47.18	tr|A0A2R8QI77|A0A2R8QI77_DANRE	Periaxin OS=Danio rerio OX=7955 GN=prx PE=4 SV=1			2	99	LKPSGGEINMK				-0.00319727	1172.62	391.88	1172.62	391.881	3	16	1.1.1.2835.5	16.1682	316.59	300.46	16.22	0.4	3840.66
1	194.25	194.25	79.32	49.37	47.18	tr|A0A2R8QI77|A0A2R8QI77_DANRE	Periaxin OS=Danio rerio OX=7955 GN=prx PE=4 SV=1			2	99	LPEHTIAEGPAIK				-0.00314587	1374.75	459.257	1374.75	459.258	3	18	1.1.1.2886.15	19.1143	1704.1	891.61	18.92	0.34	5915.32
1	194.25	194.25	79.32	49.37	47.18	tr|A0A2R8QI77|A0A2R8QI77_DANRE	Periaxin OS=Danio rerio OX=7955 GN=prx PE=4 SV=1			2	99	LPTVDISAPK				0.000677149	1039.59	520.803	1039.59	520.803	2	11	1.1.1.2956.17	23.1422	1210.45	914.38	23.29	0.63	3372.74
1	194.25	194.25	79.32	49.37	47.18	tr|A0A2R8QI77|A0A2R8QI77_DANRE	Periaxin OS=Danio rerio OX=7955 GN=prx PE=4 SV=1			2	99	LPTVEISLPQGQVEDTDIPEPR				0.000980471	2432.24	811.755	2432.24	811.755	3	17	1.1.1.3179.17	36.051	349.52	322.33	36.12	1.68	2569.84
1	194.25	194.25	79.32	49.37	47.18	tr|A0A2R8QI77|A0A2R8QI77_DANRE	Periaxin OS=Danio rerio OX=7955 GN=prx PE=4 SV=1			2	99	MDNSLPR				0.00990453	831.401	416.708	831.391	416.703	2	9	1.1.1.2837.11	16.2925	254.96	240.32	16.16	0.86	2848.45
1	194.25	194.25	79.32	49.37	47.18	tr|A0A2R8QI77|A0A2R8QI77_DANRE	Periaxin OS=Danio rerio OX=7955 GN=prx PE=4 SV=1			2	99	MPAIDVSLPNVK				0.00231719	1282.7	642.356	1282.7	642.355	2	13	1.1.1.3111.10	32.0893	212.4	198.73	32.19	0.75	1378.86
1	194.25	194.25	79.32	49.37	47.18	tr|A0A2R8QI77|A0A2R8QI77_DANRE	Periaxin OS=Danio rerio OX=7955 GN=prx PE=4 SV=1			2	99	MPEVEISLPHGK				0.00408026	1335.69	446.237	1335.69	446.236	3	12	1.1.1.3009.7	26.1853	251.37	206.53	26.29	0.87	2267.27
1	194.25	194.25	79.32	49.37	47.18	tr|A0A2R8QI77|A0A2R8QI77_DANRE	Periaxin OS=Danio rerio OX=7955 GN=prx PE=4 SV=1			2	99	MPTIDISVPK	Oxidation(M)@1			-0.00191372	1115.59	558.801	1115.59	558.802	2	10	1.1.1.2990.18	25.1073	557.48	480.99	25.31	1.39	2109.7
1	194.25	194.25	79.32	49.37	47.18	tr|A0A2R8QI77|A0A2R8QI77_DANRE	Periaxin OS=Danio rerio OX=7955 GN=prx PE=4 SV=1			2	99	MPTIDSSLPHGIK				0.00399208	1394.73	465.916	1394.72	465.915	3	12	1.1.1.2986.9	24.8611	591.81	551.86	24.96	0.69	2860.16
1	194.25	194.25	79.32	49.37	47.18	tr|A0A2R8QI77|A0A2R8QI77_DANRE	Periaxin OS=Danio rerio OX=7955 GN=prx PE=4 SV=1			2	99	MSDINVPEVTLGGNIK	Oxidation(M)@1			0.00156516	1701.86	851.938	1701.86	851.938	2	13	1.1.1.3067.28	29.5764	372.89	306.74	29.7	1.45	2108.83
1	194.25	194.25	79.32	49.37	47.18	tr|A0A2R8QI77|A0A2R8QI77_DANRE	Periaxin OS=Danio rerio OX=7955 GN=prx PE=4 SV=1			2	99	MSPESDISIEVPDSHIK	Oxidation(M)@1			-0.00427776	1898.89	633.97	1898.89	633.972	3	14	1.1.1.2999.24	25.6364	522.49	452.62	25.71	0.75	3181.58
1	194.25	194.25	79.32	49.37	47.18	tr|A0A2R8QI77|A0A2R8QI77_DANRE	Periaxin OS=Danio rerio OX=7955 GN=prx PE=4 SV=1			2	99	MTIPTFK	Oxidation(M)@1			-0.0151189	852.426	427.221	852.442	427.228	2	9	1.1.1.2905.7	20.1837	373.42	365.94	20.17	1.26	3486.43
1	194.25	194.25	79.32	49.37	47.18	tr|A0A2R8QI77|A0A2R8QI77_DANRE	Periaxin OS=Danio rerio OX=7955 GN=prx PE=4 SV=1			2	99	NDVSLPK				0.000830541	771.413	386.714	771.413	386.714	2	10	1.1.1.2843.5	16.626	431.23	419.39	16.67	1.09	4148.68
1	194.25	194.25	79.32	49.37	47.18	tr|A0A2R8QI77|A0A2R8QI77_DANRE	Periaxin OS=Danio rerio OX=7955 GN=prx PE=4 SV=1			2	99	QIFGDEIDGSMVK				0.00343227	1437.68	719.85	1437.68	719.848	2	10	1.1.1.3037.20	27.8329	365.71	270.14	27.44	1.1	1224.31
1	194.25	194.25	79.32	49.37	47.18	tr|A0A2R8QI77|A0A2R8QI77_DANRE	Periaxin OS=Danio rerio OX=7955 GN=prx PE=4 SV=1			2	99	RSGADVNVEGPDIEGGK			missed R-S@1	-0.00154152	1698.82	567.279	1698.82	567.28	3	14	1.1.1.2873.27	18.3884	707.26	270.97	18.74	0.46	1926.33
1	194.25	194.25	79.32	49.37	47.18	tr|A0A2R8QI77|A0A2R8QI77_DANRE	Periaxin OS=Danio rerio OX=7955 GN=prx PE=4 SV=1			2	99	SGADVNVEGPDIEGGK				0.00481105	1542.72	772.368	1542.72	772.365	2	21	1.1.1.2894.30	19.5924	1072.37	642.36	19.77	0.63	2966.24
1	194.25	194.25	79.32	49.37	47.18	tr|A0A2R8QI77|A0A2R8QI77_DANRE	Periaxin OS=Danio rerio OX=7955 GN=prx PE=4 SV=1			2	99	SPEGEVTLEGPGAK				-0.00409689	1369.67	685.841	1369.67	685.844	2	18	1.1.1.2892.29	19.4771	829.68	469.18	19.26	0.62	1982.62
1	194.25	194.25	79.32	49.37	47.18	tr|A0A2R8QI77|A0A2R8QI77_DANRE	Periaxin OS=Danio rerio OX=7955 GN=prx PE=4 SV=1			2	99	SRPVEVNLEGPEVK				0.000316554	1551.83	518.283	1551.83	518.282	3	12	1.1.1.2912.20	20.6072	1017.2	348.87	20.86	0.46	2662.7
1	194.25	194.25	79.32	49.37	47.18	tr|A0A2R8QI77|A0A2R8QI77_DANRE	Periaxin OS=Danio rerio OX=7955 GN=prx PE=4 SV=1			2	99	STDRENVELLK			missed R-E@4	-0.00285445	1302.68	435.232	1302.68	435.233	3	12	1.1.1.2873.10	18.3601	495.01	250.22	18.11	0.63	4168.88
1	194.25	194.25	79.32	49.37	47.18	tr|A0A2R8QI77|A0A2R8QI77_DANRE	Periaxin OS=Danio rerio OX=7955 GN=prx PE=4 SV=1			2	99	TEVDVSEADIR				0.000452758	1232.59	617.302	1232.59	617.302	2	17	1.1.1.2900.24	19.9251	867.24	784.29	20	1.09	3295.37
1	194.25	194.25	79.32	49.37	47.18	tr|A0A2R8QI77|A0A2R8QI77_DANRE	Periaxin OS=Danio rerio OX=7955 GN=prx PE=4 SV=1			2	99	TGDADNHEVEIR				0.00110309	1354.61	452.545	1354.61	452.544	3	10	1.1.1.2832.10	16.0057	400.29	395.64	16.05	0.91	2827.75
1	194.25	194.25	79.32	49.37	47.18	tr|A0A2R8QI77|A0A2R8QI77_DANRE	Periaxin OS=Danio rerio OX=7955 GN=prx PE=4 SV=1			2	99	TPTVDMDVNIPK				0.000423494	1328.67	665.34	1328.66	665.34	2	12	1.1.1.3008.28	26.1625	492.85	364.32	25.94	1.56	1733.77
1	194.25	194.25	79.32	49.37	47.18	tr|A0A2R8QI77|A0A2R8QI77_DANRE	Periaxin OS=Danio rerio OX=7955 GN=prx PE=4 SV=1			2	99	TSGGEINIEGPDIK				-0.00657629	1428.7	715.359	1428.71	715.362	2	19	1.1.1.2970.29	23.9702	482.77	452.66	23.86	0.52	2047.21
1	194.25	194.25	79.32	49.37	47.18	tr|A0A2R8QI77|A0A2R8QI77_DANRE	Periaxin OS=Danio rerio OX=7955 GN=prx PE=4 SV=1			2	99	TVDPEASGSVGVDTDKIPK			missed K-I@16	0.00299862	1913.96	638.994	1913.96	638.993	3	15	1.1.1.2925.26	21.3682	540.94	535.14	21.38	0.64	2339.85
1	194.25	194.25	79.32	49.37	47.18	tr|A0A2R8QI77|A0A2R8QI77_DANRE	Periaxin OS=Danio rerio OX=7955 GN=prx PE=4 SV=1			2	99	TVPESEVSIRPGAQTLDLR				-0.00123677	2067.09	690.039	2067.1	690.039	3	10	1.1.1.3038.18	27.8907	1010.31	472.89	27.27	0.87	2332.49
1	194.25	194.25	79.32	49.37	47.18	tr|A0A2R8QI77|A0A2R8QI77_DANRE	Periaxin OS=Danio rerio OX=7955 GN=prx PE=4 SV=1			2	99	VDISLPAVNSPGVEIFLPK				-0.00165901	1994.11	998.061	1994.11	998.062	2	17	1.1.1.3327.10	44.6121	285.03	278.53	44.56	1.15	1602.31
1	194.25	194.25	79.32	49.37	47.18	tr|A0A2R8QI77|A0A2R8QI77_DANRE	Periaxin OS=Danio rerio OX=7955 GN=prx PE=4 SV=1			2	99	VDISLQGQQEATEK				-9.84935e-05	1544.77	773.391	1544.77	773.391	2	11	1.1.1.2918.29	20.9689	367.77	180.56	20.17	1.9	1393.34
1	194.25	194.25	79.32	49.37	47.18	tr|A0A2R8QI77|A0A2R8QI77_DANRE	Periaxin OS=Danio rerio OX=7955 GN=prx PE=4 SV=1			2	99	VDISNEMTER	Oxidation(M)@7			0.000938828	1208.54	605.275	1208.53	605.274	2	11	1.1.1.2833.24	16.0859	250.89	247.64	16.1	0.63	894.944
1	194.25	194.25	79.32	49.37	47.18	tr|A0A2R8QI77|A0A2R8QI77_DANRE	Periaxin OS=Danio rerio OX=7955 GN=prx PE=4 SV=1			2	99	VDLDFSLPK				-0.0029045	1032.55	517.28	1032.55	517.282	2	12	1.1.1.3103.3	31.6135	769.4	601.85	31.43	1.45	3130.49
1	194.25	194.25	79.32	49.37	47.18	tr|A0A2R8QI77|A0A2R8QI77_DANRE	Periaxin OS=Danio rerio OX=7955 GN=prx PE=4 SV=1			2	99	VDVSLPR				-0.00124007	784.443	393.229	784.444	393.229	2	10	1.1.1.2896.3	19.6615	557.8	552.06	19.66	0.97	5037.21
1	194.25	194.25	79.32	49.37	47.18	tr|A0A2R8QI77|A0A2R8QI77_DANRE	Periaxin OS=Danio rerio OX=7955 GN=prx PE=4 SV=1			2	99	VEAGVEVQGYSGK				-0.00557657	1321.65	661.83	1321.65	661.833	2	15	1.1.1.2878.31	18.6834	525.72	356.53	18.57	0.92	1637.93
1	194.25	194.25	79.32	49.37	47.18	tr|A0A2R8QI77|A0A2R8QI77_DANRE	Periaxin OS=Danio rerio OX=7955 GN=prx PE=4 SV=1			2	99	VNVEGPDFK				-0.00248146	1003.5	502.755	1003.5	502.756	2	12	1.1.1.2881.13	18.8264	1809.65	1073.58	18.98	0.63	5322.34
1	194.25	194.25	79.32	49.37	47.18	tr|A0A2R8QI77|A0A2R8QI77_DANRE	Periaxin OS=Danio rerio OX=7955 GN=prx PE=4 SV=1			2	99	VNVEGPDIEGGK			cleaved D-V@N-term	0.00304188	1212.6	607.308	1212.6	607.307	2	17	1.1.1.2873.28	18.39	1037.01	987.82	18.46	0.92	2390.08
1	194.25	194.25	79.32	49.37	47.18	tr|A0A2R8QI77|A0A2R8QI77_DANRE	Periaxin OS=Danio rerio OX=7955 GN=prx PE=4 SV=1			2	99	VNVEGPDIK			cleaved D-V@N-term	0.000159337	969.513	485.764	969.513	485.764	2	13	1.1.1.2877.14	18.5974	2274.5	628.87	17.77	0.58	3818.35
1	194.25	194.25	79.32	49.37	47.18	tr|A0A2R8QI77|A0A2R8QI77_DANRE	Periaxin OS=Danio rerio OX=7955 GN=prx PE=4 SV=1			2	99	VSASGTDINK				0.000909436	990.499	496.257	990.498	496.256	2	10	1.1.1.2813.9	14.922	321.56	258.26	14.62	1.2	1017.72
1	194.25	194.25	79.32	49.37	47.18	tr|A0A2R8QI77|A0A2R8QI77_DANRE	Periaxin OS=Danio rerio OX=7955 GN=prx PE=4 SV=1			2	99	VSTGASFK				-0.000774843	795.412	398.713	795.413	398.714	2	8	1.1.1.2821.4	15.3718	216.46	191.72	15.25	0.91	1537.11
1	194.25	194.25	79.32	49.37	47.18	tr|A0A2R8QI77|A0A2R8QI77_DANRE	Periaxin OS=Danio rerio OX=7955 GN=prx PE=4 SV=1			2	99	VYFDNVK				-0.00291077	883.441	442.728	883.444	442.729	2	9	1.1.1.2881.7	18.8163	536.43	522.86	18.8	0.4	5123.8
1	194.25	194.25	79.32	49.37	47.18	tr|A0A2R8QI77|A0A2R8QI77_DANRE	Periaxin OS=Danio rerio OX=7955 GN=prx PE=4 SV=1			2	99	VYKPSIDISLPK				0.000681976	1358.78	453.935	1358.78	453.934	3	13	1.1.1.3036.7	27.7451	937.47	563.46	27.96	0.69	3235.57
1	194.25	194.25	79.32	49.37	47.18	tr|A0A2R8QI77|A0A2R8QI77_DANRE	Periaxin OS=Danio rerio OX=7955 GN=prx PE=4 SV=1			1.74473	98.57	GGKFEIPKNDVSLPK			missed K-F@3; missed K-N@8	0.00805841	1627.9	407.983	1627.89	407.981	4	8	1.1.1.2989.4	25.0261	69.47	55.28	25.31	0.69	3118.89
1	194.25	194.25	79.32	49.37	47.18	tr|A0A2R8QI77|A0A2R8QI77_DANRE	Periaxin OS=Danio rerio OX=7955 GN=prx PE=4 SV=1			1.60206	98	LDVSMPK				0.00604991	788.416	395.215	788.41	395.212	2	8	1.1.1.2894.3	19.5475	255.86	248.73	19.49	1.03	3461.22
1	194.25	194.25	79.32	49.37	47.18	tr|A0A2R8QI77|A0A2R8QI77_DANRE	Periaxin OS=Danio rerio OX=7955 GN=prx PE=4 SV=1			1.38722	96.13	TEMLAER				-0.0050116	848.401	425.208	848.406	425.21	2	7	1.1.1.2839.11	16.4068	212.15	168.56	16.33	0.8	2404.04
1	194.25	194.25	79.32	49.37	47.18	tr|A0A2R8QI77|A0A2R8QI77_DANRE	Periaxin OS=Danio rerio OX=7955 GN=prx PE=4 SV=1			0.950782	93.58	VSLPEGK				-0.00166656	728.405	365.21	728.407	365.211	2	8	1.1.1.2840.4	16.4523	478.3	411.83	16.33	1.03	3860.94
1	194.25	194.25	79.32	49.37	47.18	tr|A0A2R8QI77|A0A2R8QI77_DANRE	Periaxin OS=Danio rerio OX=7955 GN=prx PE=4 SV=1			0.920819	90.16	GGKLEMPKLDVSLPK	Oxidation(M)@6		missed K-L@3; missed K-L@8	-0.0049459	1626.9	407.731	1626.9	407.733	4	7	1.1.1.2997.4	25.4877	74.45	68.63	25.6	0.58	2842.75
1	194.25	194.25	79.32	49.37	47.18	tr|A0A2R8QI77|A0A2R8QI77_DANRE	Periaxin OS=Danio rerio OX=7955 GN=prx PE=4 SV=1			0.806875	87.14	VSFFLK				0.001837	739.429	370.722	739.427	370.721	2	6	1.1.1.3010.2	26.2348	286.9	267.71	26.06	1.1	2584.4
1	194.25	194.25	79.32	49.37	47.18	tr|A0A2R8QI77|A0A2R8QI77_DANRE	Periaxin OS=Danio rerio OX=7955 GN=prx PE=4 SV=1			0.779892	91.45	QIGTTESKPK	Gln->pyro-Glu@N-term			9.22885e-05	1070.56	536.288	1070.56	536.288	2	8	1.1.1.2821.12	15.3901	265.54	261.58	15.42	0.57	1507.96
1	194.25	194.25	79.32	49.37	47.18	tr|A0A2R8QI77|A0A2R8QI77_DANRE	Periaxin OS=Danio rerio OX=7955 GN=prx PE=4 SV=1			0.69897	83.35	AFGAEINTEDPNIKGEK			missed K-G@14	-0.00584279	1831.89	611.637	1831.9	611.639	3	9	2.1.1.2945.27	21.3994	199	189.47	21.36	0.69	1769.51
1	194.25	194.25	79.32	49.37	47.18	tr|A0A2R8QI77|A0A2R8QI77_DANRE	Periaxin OS=Danio rerio OX=7955 GN=prx PE=4 SV=1			0.530178	72.84	GYEGSLK				-0.00363346	752.367	377.191	752.37	377.193	2	7	1.1.1.2822.3	15.4274	160.17	143.02	15.31	0.63	1955.53
1	194.25	194.25	79.32	49.37	47.18	tr|A0A2R8QI77|A0A2R8QI77_DANRE	Periaxin OS=Danio rerio OX=7955 GN=prx PE=4 SV=1			0.518557	74.19	YEDALK				-0.00154798	737.358	369.686	737.36	369.687	2	7	1.1.1.2845.6	16.7427	158.17	155.99	16.68	0.86	2029.93
1	194.25	194.25	79.32	49.37	47.18	tr|A0A2R8QI77|A0A2R8QI77_DANRE	Periaxin OS=Danio rerio OX=7955 GN=prx PE=4 SV=1			0.492144	72.46	VTFSSGQK				-9.5932e-05	852.434	427.224	852.434	427.224	2	5	1.1.1.2815.5	15.0296	198.13	82.96	15.31	0.63	925.638
1	194.25	194.25	79.32	49.37	47.18	tr|A0A2R8QI77|A0A2R8QI77_DANRE	Periaxin OS=Danio rerio OX=7955 GN=prx PE=4 SV=1			0.338187	59.56	VHMPSIDITLPVGGVGSDLDVK	Oxidation(M)@3			-0.00768491	2264.16	755.729	2264.17	755.731	3	12	1.1.1.3186.10	36.451	679.4	652.54	36.3	0.81	2606.41
1	194.25	194.25	79.32	49.37	47.18	tr|A0A2R8QI77|A0A2R8QI77_DANRE	Periaxin OS=Danio rerio OX=7955 GN=prx PE=4 SV=1			0.173277	73.23	MNLSTGEIK	Oxidation(M)@1; Deamidated(N)@2			0.00802746	1008.49	505.251	1008.48	505.247	2	6	1.1.1.2844.22	16.7118	297.89	249.61	16.62	0.8	1503.21
1	194.25	194.25	79.32	49.37	47.18	tr|A0A2R8QI77|A0A2R8QI77_DANRE	Periaxin OS=Danio rerio OX=7955 GN=prx PE=4 SV=1			0.165579	39.46	STAGESGHLEGMITGGK				-0.00284219	1630.76	544.594	1630.76	544.595	3	9	1.1.1.2924.23	21.3053	321.82	275.7	21.21	0.81	3221.98
1	194.25	194.25	79.32	49.37	47.18	tr|A0A2R8QI77|A0A2R8QI77_DANRE	Periaxin OS=Danio rerio OX=7955 GN=prx PE=4 SV=1			0.159894	35.75	RESQVPYSEQEGAK			missed R-E@1	0.00344823	1606.76	536.595	1606.76	536.594	3	6	1.1.1.2832.18	16.019	176.83	120.43	15.87	1.03	1089.22
1	194.25	194.25	79.32	49.37	47.18	tr|A0A2R8QI77|A0A2R8QI77_DANRE	Periaxin OS=Danio rerio OX=7955 GN=prx PE=4 SV=1			0.145694	33.24	AEMPQIDVK				0.00268492	1029.52	515.767	1029.52	515.766	2	7	1.1.1.2922.18	21.1813	626.11	614.7	21.21	0.81	2963.02
1	194.25	194.25	79.32	49.37	47.18	tr|A0A2R8QI77|A0A2R8QI77_DANRE	Periaxin OS=Danio rerio OX=7955 GN=prx PE=4 SV=1			0.112946	27.05	FKIPNIDKPK			missed K-I@2	0.00486908	1198.71	400.578	1198.71	400.576	3	7	1.1.1.2941.5	22.2568	143.84	142.16	22.31	0.69	2229.07
1	194.25	194.25	79.32	49.37	47.18	tr|A0A2R8QI77|A0A2R8QI77_DANRE	Periaxin OS=Danio rerio OX=7955 GN=prx PE=4 SV=1			0.0925886	22.9	VDLSLPHGK				-0.00205278	964.532	483.273	964.534	483.274	2	4	11.1.1.3023.7	15.4146	350.74	333.88	15.34	0.57	1869.69
1	194.25	194.25	79.32	49.37	47.18	tr|A0A2R8QI77|A0A2R8QI77_DANRE	Periaxin OS=Danio rerio OX=7955 GN=prx PE=4 SV=1			0.0867161	21.66	TSGGEINIEGPDIEGGK				0.00311237	1671.8	836.906	1671.8	836.905	2	6	1.1.1.2955.30	23.106	440.23	160.05	23.46	0.81	841.955
1	194.25	194.25	79.32	49.37	47.18	tr|A0A2R8QI77|A0A2R8QI77_DANRE	Periaxin OS=Danio rerio OX=7955 GN=prx PE=4 SV=1			0.076238	19.32	GTSHFPHVTIPK				0.00383364	1319.7	440.908	1319.7	440.907	3	7	1.1.1.2927.4	21.4468	327.73	325.25	21.44	0.98	3831.45
1	194.25	194.25	79.32	49.37	47.18	tr|A0A2R8QI77|A0A2R8QI77_DANRE	Periaxin OS=Danio rerio OX=7955 GN=prx PE=4 SV=1			0.0423927	50.36	TNIDIK			cleaved M-T@N-term	0.00173701	702.393	352.204	702.391	352.203	2	7	1.1.1.2834.2	16.1062	181.96	156.77	16.79	1.37	1903.07
1	194.25	194.25	79.32	49.37	47.18	tr|A0A2R8QI77|A0A2R8QI77_DANRE	Periaxin OS=Danio rerio OX=7955 GN=prx PE=4 SV=1			0.0181814	18.53	IPNIDKPK	Deamidated(N)@3			-0.0104282	924.518	463.266	924.528	463.271	2	4	13.1.1.3222.14	27.2991	260.01	242.47	27.33	0.92	1385.54
1	194.25	194.25	79.32	49.37	47.18	tr|A0A2R8QI77|A0A2R8QI77_DANRE	Periaxin OS=Danio rerio OX=7955 GN=prx PE=4 SV=1			0	99	AEANAPNLEVGGK				0.00164541	1268.64	635.326	1268.64	635.325	2	16	1.1.1.2867.28	18.0442	1419.6	1014.78	18.17	0.4	3886.74
1	194.25	194.25	79.32	49.37	47.18	tr|A0A2R8QI77|A0A2R8QI77_DANRE	Periaxin OS=Danio rerio OX=7955 GN=prx PE=4 SV=1			0	99	AEANAPNLEVGGK				0.00164541	1268.64	635.326	1268.64	635.325	2	20	1.1.1.2869.30	18.1629	1419.6	1413.81	18.17	0.4	5239.96
1	194.25	194.25	79.32	49.37	47.18	tr|A0A2R8QI77|A0A2R8QI77_DANRE	Periaxin OS=Danio rerio OX=7955 GN=prx PE=4 SV=1			0	99	AEANAPNLEVGGK				0.00164541	1268.64	635.326	1268.64	635.325	2	17	1.1.1.2871.30	18.2782	1419.6	976.37	18.17	0.4	3560.74
1	194.25	194.25	79.32	49.37	47.18	tr|A0A2R8QI77|A0A2R8QI77_DANRE	Periaxin OS=Danio rerio OX=7955 GN=prx PE=4 SV=1			0	99	AEANAPNLEVGGK				0.00164541	1268.64	635.326	1268.64	635.325	2	13	1.1.1.2876.29	18.5647	1419.6	449.78	18.17	0.4	1935.63
1	194.25	194.25	79.32	49.37	47.18	tr|A0A2R8QI77|A0A2R8QI77_DANRE	Periaxin OS=Danio rerio OX=7955 GN=prx PE=4 SV=1			0	16.7	AEANAPNLEVGGK				-0.00604504	1268.63	635.322	1268.64	635.325	2	6	1.1.1.2883.27	18.9645	405.26	388.55	19.03	1.48	1522.53
1	194.25	194.25	79.32	49.37	47.18	tr|A0A2R8QI77|A0A2R8QI77_DANRE	Periaxin OS=Danio rerio OX=7955 GN=prx PE=4 SV=1			0	99	AEDGRPSSGSSFDVPEVSLK				-0.00161054	2062.98	688.667	2062.98	688.668	3	13	1.1.1.3024.24	27.0803	827.67	407.58	26.58	0.75	1681.1
1	194.25	194.25	79.32	49.37	47.18	tr|A0A2R8QI77|A0A2R8QI77_DANRE	Periaxin OS=Danio rerio OX=7955 GN=prx PE=4 SV=1			0	99	AEDGRPSSGSSFDVPEVSLK				-0.00161054	2062.98	688.667	2062.98	688.668	3	12	1.1.1.3031.24	27.4929	827.67	263.13	26.58	0.75	1926.57
1	194.25	194.25	79.32	49.37	47.18	tr|A0A2R8QI77|A0A2R8QI77_DANRE	Periaxin OS=Danio rerio OX=7955 GN=prx PE=4 SV=1			0	99	AEDGRPSSGSSFDVPEVSLK				-0.00161054	2062.98	688.667	2062.98	688.668	3	14	1.1.1.3042.18	28.1184	827.67	175.11	26.58	0.75	1911.37
1	194.25	194.25	79.32	49.37	47.18	tr|A0A2R8QI77|A0A2R8QI77_DANRE	Periaxin OS=Danio rerio OX=7955 GN=prx PE=4 SV=1			0	99	AEDGRPSSGSSFDVPEVSLK				-0.00161054	2062.98	688.667	2062.98	688.668	3	11	1.1.1.3026.25	27.1974	827.67	344.62	26.58	0.75	2180.68
1	194.25	194.25	79.32	49.37	47.18	tr|A0A2R8QI77|A0A2R8QI77_DANRE	Periaxin OS=Danio rerio OX=7955 GN=prx PE=4 SV=1			0	99	AEGDVVVETHGGQGGK				0.00178137	1538.73	513.919	1538.73	513.918	3	16	1.1.1.2824.11	15.5542	1351.41	1350.07	15.54	0.4	10254.4
1	194.25	194.25	79.32	49.37	47.18	tr|A0A2R8QI77|A0A2R8QI77_DANRE	Periaxin OS=Danio rerio OX=7955 GN=prx PE=4 SV=1			0	99	AEGDVVVETHGGQGGK				0.00178137	1538.73	513.919	1538.73	513.918	3	13	1.1.1.2829.15	15.8437	1351.41	700.31	15.54	0.4	7167.47
1	194.25	194.25	79.32	49.37	47.18	tr|A0A2R8QI77|A0A2R8QI77_DANRE	Periaxin OS=Danio rerio OX=7955 GN=prx PE=4 SV=1			0	99	AEGDVVVETHGGQGGK				0.00178137	1538.73	513.919	1538.73	513.918	3	13	1.1.1.2825.10	15.6091	1351.41	1262.67	15.54	0.4	7203.36
1	194.25	194.25	79.32	49.37	47.18	tr|A0A2R8QI77|A0A2R8QI77_DANRE	Periaxin OS=Danio rerio OX=7955 GN=prx PE=4 SV=1			0	99	AEGDVVVETHGGQGGK				0.00178137	1538.73	513.919	1538.73	513.918	3	13	1.1.1.2836.17	16.2453	1351.41	381.98	15.54	0.4	3734.17
1	194.25	194.25	79.32	49.37	47.18	tr|A0A2R8QI77|A0A2R8QI77_DANRE	Periaxin OS=Danio rerio OX=7955 GN=prx PE=4 SV=1			0	99	AEGDVVVETHGGQGGK				0.00178137	1538.73	513.919	1538.73	513.918	3	12	1.1.1.2853.20	17.2239	1351.41	242.9	15.54	0.4	3168.58
1	194.25	194.25	79.32	49.37	47.18	tr|A0A2R8QI77|A0A2R8QI77_DANRE	Periaxin OS=Danio rerio OX=7955 GN=prx PE=4 SV=1			0	99	AEGDVVVETHGGQGGK				0.00178137	1538.73	513.919	1538.73	513.918	3	11	1.1.1.2833.16	16.0725	1351.41	436.76	15.54	0.4	4696.17
1	194.25	194.25	79.32	49.37	47.18	tr|A0A2R8QI77|A0A2R8QI77_DANRE	Periaxin OS=Danio rerio OX=7955 GN=prx PE=4 SV=1			0	93.68	AEGDVVVETHGGQGGK				0.00342932	1538.74	513.919	1538.73	513.918	3	9	1.1.1.2857.17	17.4498	305.7	207.18	16.67	1.09	3142.89
1	194.25	194.25	79.32	49.37	47.18	tr|A0A2R8QI77|A0A2R8QI77_DANRE	Periaxin OS=Danio rerio OX=7955 GN=prx PE=4 SV=1			0	52.49	AEGDVVVETHGGQGGK				0.00178137	1538.73	513.919	1538.73	513.918	3	9	1.1.1.2840.21	16.4807	1351.41	276.07	15.54	0.4	3769.56
1	194.25	194.25	79.32	49.37	47.18	tr|A0A2R8QI77|A0A2R8QI77_DANRE	Periaxin OS=Danio rerio OX=7955 GN=prx PE=4 SV=1			0	34.26	AEGDVVVETHGGQGGK				0.00178137	1538.73	513.919	1538.73	513.918	3	8	1.1.1.2848.19	16.9373	1351.41	232.34	15.54	0.4	3485.53
1	194.25	194.25	79.32	49.37	47.18	tr|A0A2R8QI77|A0A2R8QI77_DANRE	Periaxin OS=Danio rerio OX=7955 GN=prx PE=4 SV=1			0	20.18	AEGDVVVETHGGQGGK				0.00178137	1538.73	513.919	1538.73	513.918	3	8	1.1.1.2827.16	15.7321	1351.41	850.33	15.54	0.4	2913.53
1	194.25	194.25	79.32	49.37	47.18	tr|A0A2R8QI77|A0A2R8QI77_DANRE	Periaxin OS=Danio rerio OX=7955 GN=prx PE=4 SV=1			0	99	AELDIEGLHGR				0.00203359	1208.62	403.88	1208.61	403.879	3	12	1.1.1.2934.4	21.8511	452.02	439.51	21.9	0.63	5154.08
1	194.25	194.25	79.32	49.37	47.18	tr|A0A2R8QI77|A0A2R8QI77_DANRE	Periaxin OS=Danio rerio OX=7955 GN=prx PE=4 SV=1			0	99	AELDIEGLHGR				0.00203359	1208.62	403.88	1208.61	403.879	3	11	1.1.1.2938.5	22.0838	452.02	379.94	21.9	0.63	4529.1
1	194.25	194.25	79.32	49.37	47.18	tr|A0A2R8QI77|A0A2R8QI77_DANRE	Periaxin OS=Danio rerio OX=7955 GN=prx PE=4 SV=1			0	99	AFGAEINTEDPNIK				-0.00277563	1517.73	759.874	1517.74	759.875	2	21	1.1.1.2955.26	23.0994	711.5	650.43	23.17	0.69	2207.18
1	194.25	194.25	79.32	49.37	47.18	tr|A0A2R8QI77|A0A2R8QI77_DANRE	Periaxin OS=Danio rerio OX=7955 GN=prx PE=4 SV=1			0	99	AFGAEINTEDPNIK				-0.00277563	1517.73	759.874	1517.74	759.875	2	21	1.1.1.2959.28	23.3335	711.5	574.68	23.17	0.69	2120.59
1	194.25	194.25	79.32	49.37	47.18	tr|A0A2R8QI77|A0A2R8QI77_DANRE	Periaxin OS=Danio rerio OX=7955 GN=prx PE=4 SV=1			0	99	AFGAEINTEDPNIK				-0.00277563	1517.73	759.874	1517.74	759.875	2	16	1.1.1.2961.26	23.4455	711.5	446.58	23.17	0.69	1634.84
1	194.25	194.25	79.32	49.37	47.18	tr|A0A2R8QI77|A0A2R8QI77_DANRE	Periaxin OS=Danio rerio OX=7955 GN=prx PE=4 SV=1			0	27.32	AFGAEINTEDPNIKGEK			missed K-G@14	-0.00584279	1831.89	611.637	1831.9	611.639	3	9	2.1.1.2946.27	21.4571	199	177.86	21.36	0.69	1796.3
1	194.25	194.25	79.32	49.37	47.18	tr|A0A2R8QI77|A0A2R8QI77_DANRE	Periaxin OS=Danio rerio OX=7955 GN=prx PE=4 SV=1			0	99	DEEVQEIGTLVSSK				-0.00271322	1532.75	767.384	1532.76	767.386	2	23	1.1.1.3050.23	28.5875	533.78	497.1	28.71	0.75	2322.09
1	194.25	194.25	79.32	49.37	47.18	tr|A0A2R8QI77|A0A2R8QI77_DANRE	Periaxin OS=Danio rerio OX=7955 GN=prx PE=4 SV=1			0	99	DEEVQEIGTLVSSK				-0.00271322	1532.75	767.384	1532.76	767.386	2	19	1.1.1.3052.29	28.7063	533.78	530.77	28.71	0.75	2247.97
1	194.25	194.25	79.32	49.37	47.18	tr|A0A2R8QI77|A0A2R8QI77_DANRE	Periaxin OS=Danio rerio OX=7955 GN=prx PE=4 SV=1			0	99	DEEVQEIGTLVSSK				-0.00271322	1532.75	767.384	1532.76	767.386	2	22	1.1.1.3056.27	28.9377	533.78	381.48	28.71	0.75	1730.51
1	194.25	194.25	79.32	49.37	47.18	tr|A0A2R8QI77|A0A2R8QI77_DANRE	Periaxin OS=Danio rerio OX=7955 GN=prx PE=4 SV=1			0	99	DEEVQEIGTLVSSK				-0.00271322	1532.75	767.384	1532.76	767.386	2	21	1.1.1.3058.22	29.0496	533.78	313.12	28.71	0.75	1742.02
1	194.25	194.25	79.32	49.37	47.18	tr|A0A2R8QI77|A0A2R8QI77_DANRE	Periaxin OS=Danio rerio OX=7955 GN=prx PE=4 SV=1			0	99	DEEVQEIGTLVSSK				-0.00271322	1532.75	767.384	1532.76	767.386	2	20	1.1.1.3061.20	29.223	533.78	361.49	28.71	0.75	1844.99
1	194.25	194.25	79.32	49.37	47.18	tr|A0A2R8QI77|A0A2R8QI77_DANRE	Periaxin OS=Danio rerio OX=7955 GN=prx PE=4 SV=1			0	99	DEEVQEIGTLVSSK				0.0018034	1532.76	767.387	1532.76	767.386	2	22	1.1.1.3065.26	29.4541	332.96	330.46	29.46	1.1	1587.74
1	194.25	194.25	79.32	49.37	47.18	tr|A0A2R8QI77|A0A2R8QI77_DANRE	Periaxin OS=Danio rerio OX=7955 GN=prx PE=4 SV=1			0	99	DEEVQEIGTLVSSK				0.0018034	1532.76	767.387	1532.76	767.386	2	13	1.1.1.3067.25	29.5664	332.96	315.43	29.46	1.1	1611.1
1	194.25	194.25	79.32	49.37	47.18	tr|A0A2R8QI77|A0A2R8QI77_DANRE	Periaxin OS=Danio rerio OX=7955 GN=prx PE=4 SV=1			0	99	DEEVQEIGTLVSSK				0.0018034	1532.76	767.387	1532.76	767.386	2	19	1.1.1.3069.21	29.6854	332.96	303.51	29.46	1.1	1525.86
1	194.25	194.25	79.32	49.37	47.18	tr|A0A2R8QI77|A0A2R8QI77_DANRE	Periaxin OS=Danio rerio OX=7955 GN=prx PE=4 SV=1			0	99	DEEVQEIGTLVSSK				0.0018034	1532.76	767.387	1532.76	767.386	2	22	1.1.1.3074.15	29.9713	332.96	271.34	29.46	1.1	1641.67
1	194.25	194.25	79.32	49.37	47.18	tr|A0A2R8QI77|A0A2R8QI77_DANRE	Periaxin OS=Danio rerio OX=7955 GN=prx PE=4 SV=1			0	99	DEEVQEIGTLVSSK				0.000335698	1532.76	511.926	1532.76	511.926	3	11	1.1.1.3054.10	28.7903	158.45	150.57	28.71	0.69	2708.78
1	194.25	194.25	79.32	49.37	47.18	tr|A0A2R8QI77|A0A2R8QI77_DANRE	Periaxin OS=Danio rerio OX=7955 GN=prx PE=4 SV=1			0	99	DEEVQEIGTLVSSK				0.000335698	1532.76	511.926	1532.76	511.926	3	9	1.1.1.3052.10	28.6747	158.45	157.92	28.71	0.69	2070.2
1	194.25	194.25	79.32	49.37	47.18	tr|A0A2R8QI77|A0A2R8QI77_DANRE	Periaxin OS=Danio rerio OX=7955 GN=prx PE=4 SV=1			0	85.96	DEEVQEIGTLVSSK				0.000335698	1532.76	511.926	1532.76	511.926	3	9	1.1.1.3056.6	28.8993	158.45	109.33	28.71	0.69	3610.69
1	194.25	194.25	79.32	49.37	47.18	tr|A0A2R8QI77|A0A2R8QI77_DANRE	Periaxin OS=Danio rerio OX=7955 GN=prx PE=4 SV=1			0	75.61	DEEVQEIGTLVSSK				0.000335698	1532.76	511.926	1532.76	511.926	3	7	1.1.1.3049.9	28.4997	158.45	130.34	28.71	0.69	1529.32
1	194.25	194.25	79.32	49.37	47.18	tr|A0A2R8QI77|A0A2R8QI77_DANRE	Periaxin OS=Danio rerio OX=7955 GN=prx PE=4 SV=1			0	66.38	DEEVQEIGTLVSSK				0.000335698	1532.76	511.926	1532.76	511.926	3	8	1.1.1.3058.5	29.013	158.45	91.77	28.71	0.69	3934.23
1	194.25	194.25	79.32	49.37	47.18	tr|A0A2R8QI77|A0A2R8QI77_DANRE	Periaxin OS=Danio rerio OX=7955 GN=prx PE=4 SV=1			0	53.35	DEEVQEIGTLVSSK				0.00335695	1532.76	511.927	1532.76	511.926	3	7	1.1.1.3060.9	29.1351	159.12	114.81	28.72	1.04	3424.53
1	194.25	194.25	79.32	49.37	47.18	tr|A0A2R8QI77|A0A2R8QI77_DANRE	Periaxin OS=Danio rerio OX=7955 GN=prx PE=4 SV=1			0	99	FDISMPK				0.00385297	836.414	419.214	836.41	419.212	2	10	1.1.1.2983.5	24.6813	865.05	763.6	24.84	1.39	7511
1	194.25	194.25	79.32	49.37	47.18	tr|A0A2R8QI77|A0A2R8QI77_DANRE	Periaxin OS=Danio rerio OX=7955 GN=prx PE=4 SV=1			0	99	FDISMPK	Oxidation(M)@5			-0.000706102	852.404	427.209	852.405	427.21	2	9	1.1.1.2883.5	18.9278	726.28	725.08	18.98	0.85	6106.37
1	194.25	194.25	79.32	49.37	47.18	tr|A0A2R8QI77|A0A2R8QI77_DANRE	Periaxin OS=Danio rerio OX=7955 GN=prx PE=4 SV=1			0	99	FDISMPK				0.00385297	836.414	419.214	836.41	419.212	2	10	1.1.1.2985.6	24.7984	865.05	853.12	24.84	1.39	7575.2
1	194.25	194.25	79.32	49.37	47.18	tr|A0A2R8QI77|A0A2R8QI77_DANRE	Periaxin OS=Danio rerio OX=7955 GN=prx PE=4 SV=1			0	99	FDISMPK	Oxidation(M)@5			-0.000706102	852.404	427.209	852.405	427.21	2	9	1.1.1.2881.5	18.813	726.28	488.63	18.98	0.85	4887.24
1	194.25	194.25	79.32	49.37	47.18	tr|A0A2R8QI77|A0A2R8QI77_DANRE	Periaxin OS=Danio rerio OX=7955 GN=prx PE=4 SV=1			0	99	FDISMPK				0.00385297	836.414	419.214	836.41	419.212	2	10	1.1.1.2981.5	24.5656	865.05	610.58	24.84	1.39	5750.37
1	194.25	194.25	79.32	49.37	47.18	tr|A0A2R8QI77|A0A2R8QI77_DANRE	Periaxin OS=Danio rerio OX=7955 GN=prx PE=4 SV=1			0	99	FDISMPK	Oxidation(M)@5			-0.000706102	852.404	427.209	852.405	427.21	2	8	1.1.1.2889.5	19.2672	726.28	393.9	18.98	0.85	3478.72
1	194.25	194.25	79.32	49.37	47.18	tr|A0A2R8QI77|A0A2R8QI77_DANRE	Periaxin OS=Danio rerio OX=7955 GN=prx PE=4 SV=1			0	99	FDISMPK	Oxidation(M)@5			-0.000706102	852.404	427.209	852.405	427.21	2	8	1.1.1.2887.4	19.1525	726.28	497.63	18.98	0.85	4203.97
1	194.25	194.25	79.32	49.37	47.18	tr|A0A2R8QI77|A0A2R8QI77_DANRE	Periaxin OS=Danio rerio OX=7955 GN=prx PE=4 SV=1			0	99	FDISMPK	Oxidation(M)@5			-0.000706102	852.404	427.209	852.405	427.21	2	8	1.1.1.2891.6	19.3821	726.28	371.77	18.98	0.85	3465.52
1	194.25	194.25	79.32	49.37	47.18	tr|A0A2R8QI77|A0A2R8QI77_DANRE	Periaxin OS=Danio rerio OX=7955 GN=prx PE=4 SV=1			0	99	FDISMPK				0.00385297	836.414	419.214	836.41	419.212	2	9	1.1.1.2979.7	24.4535	865.05	333.89	24.84	1.39	4322.76
1	194.25	194.25	79.32	49.37	47.18	tr|A0A2R8QI77|A0A2R8QI77_DANRE	Periaxin OS=Danio rerio OX=7955 GN=prx PE=4 SV=1			0	99	FDISMPK				0.00385297	836.414	419.214	836.41	419.212	2	9	1.1.1.2991.7	25.1466	865.05	527.36	24.84	1.39	5709.06
1	194.25	194.25	79.32	49.37	47.18	tr|A0A2R8QI77|A0A2R8QI77_DANRE	Periaxin OS=Danio rerio OX=7955 GN=prx PE=4 SV=1			0	99	FDISMPK				0.00385297	836.414	419.214	836.41	419.212	2	10	1.1.1.2987.5	24.9123	865.05	702.42	24.84	1.39	7567.19
1	194.25	194.25	79.32	49.37	47.18	tr|A0A2R8QI77|A0A2R8QI77_DANRE	Periaxin OS=Danio rerio OX=7955 GN=prx PE=4 SV=1			0	99	FDISMPK				0.00385297	836.414	419.214	836.41	419.212	2	9	1.1.1.2993.6	25.2602	865.05	487.58	24.84	1.39	5623.58
1	194.25	194.25	79.32	49.37	47.18	tr|A0A2R8QI77|A0A2R8QI77_DANRE	Periaxin OS=Danio rerio OX=7955 GN=prx PE=4 SV=1			0	99	FDISMPK				0.00385297	836.414	419.214	836.41	419.212	2	9	1.1.1.3008.9	26.1308	865.05	248.23	24.84	1.39	3000.42
1	194.25	194.25	79.32	49.37	47.18	tr|A0A2R8QI77|A0A2R8QI77_DANRE	Periaxin OS=Danio rerio OX=7955 GN=prx PE=4 SV=1			0	99	FDISMPK				0.00385297	836.414	419.214	836.41	419.212	2	9	1.1.1.3014.6	26.4725	865.05	180.02	24.84	1.39	2568.7
1	194.25	194.25	79.32	49.37	47.18	tr|A0A2R8QI77|A0A2R8QI77_DANRE	Periaxin OS=Danio rerio OX=7955 GN=prx PE=4 SV=1			0	98.62	FDISMPK				0.00385297	836.414	419.214	836.41	419.212	2	8	1.1.1.2989.6	25.0294	865.05	559.21	24.84	1.39	6166.97
1	194.25	194.25	79.32	49.37	47.18	tr|A0A2R8QI77|A0A2R8QI77_DANRE	Periaxin OS=Danio rerio OX=7955 GN=prx PE=4 SV=1			0	98	FDISMPK	Oxidation(M)@5			-0.000706102	852.404	427.209	852.405	427.21	2	8	1.1.1.2893.6	19.4956	726.28	366.02	18.98	0.85	4041.32
1	194.25	194.25	79.32	49.37	47.18	tr|A0A2R8QI77|A0A2R8QI77_DANRE	Periaxin OS=Danio rerio OX=7955 GN=prx PE=4 SV=1			0	97	FDISMPK				0.00385297	836.414	419.214	836.41	419.212	2	8	1.1.1.3003.5	25.8357	865.05	293.88	24.84	1.39	3587.9
1	194.25	194.25	79.32	49.37	47.18	tr|A0A2R8QI77|A0A2R8QI77_DANRE	Periaxin OS=Danio rerio OX=7955 GN=prx PE=4 SV=1			0	96.39	FDISMPK				0.00305951	836.413	419.214	836.41	419.212	2	7	1.1.1.3017.5	26.6441	193.6	176.32	26.75	0.35	2553.01
1	194.25	194.25	79.32	49.37	47.18	tr|A0A2R8QI77|A0A2R8QI77_DANRE	Periaxin OS=Danio rerio OX=7955 GN=prx PE=4 SV=1			0	96.1	FDISMPK				0.00305951	836.413	419.214	836.41	419.212	2	7	1.1.1.3019.4	26.7581	193.6	191.71	26.75	0.35	2355.35
1	194.25	194.25	79.32	49.37	47.18	tr|A0A2R8QI77|A0A2R8QI77_DANRE	Periaxin OS=Danio rerio OX=7955 GN=prx PE=4 SV=1			0	96.09	FDISMPK				0.00385297	836.414	419.214	836.41	419.212	2	7	1.1.1.3012.7	26.3585	865.05	197.3	24.84	1.39	2739.28
1	194.25	194.25	79.32	49.37	47.18	tr|A0A2R8QI77|A0A2R8QI77_DANRE	Periaxin OS=Danio rerio OX=7955 GN=prx PE=4 SV=1			0	95.41	FDISMPK				0.00385297	836.414	419.214	836.41	419.212	2	8	1.1.1.2999.5	25.6047	865.05	360.54	24.84	1.39	4173.68
1	194.25	194.25	79.32	49.37	47.18	tr|A0A2R8QI77|A0A2R8QI77_DANRE	Periaxin OS=Danio rerio OX=7955 GN=prx PE=4 SV=1			0	92.35	FDISMPK				0.00385297	836.414	419.214	836.41	419.212	2	7	1.1.1.3005.6	25.9527	865.05	276.5	24.84	1.39	3167.08
1	194.25	194.25	79.32	49.37	47.18	tr|A0A2R8QI77|A0A2R8QI77_DANRE	Periaxin OS=Danio rerio OX=7955 GN=prx PE=4 SV=1			0	92.03	FDISMPK				0.00385297	836.414	419.214	836.41	419.212	2	8	1.1.1.2997.5	25.4894	865.05	355.66	24.84	1.39	4684.69
1	194.25	194.25	79.32	49.37	47.18	tr|A0A2R8QI77|A0A2R8QI77_DANRE	Periaxin OS=Danio rerio OX=7955 GN=prx PE=4 SV=1			0	91.07	FDISMPK				0.00776067	836.418	419.216	836.41	419.212	2	6	1.1.1.3026.4	27.1624	168.76	166.86	27.27	1.1	2064.02
1	194.25	194.25	79.32	49.37	47.18	tr|A0A2R8QI77|A0A2R8QI77_DANRE	Periaxin OS=Danio rerio OX=7955 GN=prx PE=4 SV=1			0	90.82	FDISMPK				0.00385297	836.414	419.214	836.41	419.212	2	6	1.1.1.3022.4	26.9316	865.05	129	24.84	1.39	2412.53
1	194.25	194.25	79.32	49.37	47.18	tr|A0A2R8QI77|A0A2R8QI77_DANRE	Periaxin OS=Danio rerio OX=7955 GN=prx PE=4 SV=1			0	90.45	FDISMPK				0.00385297	836.414	419.214	836.41	419.212	2	8	1.1.1.2995.7	25.3774	865.05	430.16	24.84	1.39	5009.11
1	194.25	194.25	79.32	49.37	47.18	tr|A0A2R8QI77|A0A2R8QI77_DANRE	Periaxin OS=Danio rerio OX=7955 GN=prx PE=4 SV=1			0	88.2	FDISMPK	Oxidation(M)@5			-0.0142608	852.391	427.203	852.405	427.21	2	7	1.1.1.3023.4	26.9893	85.35	75.98	26.46	1.39	1309.76
1	194.25	194.25	79.32	49.37	47.18	tr|A0A2R8QI77|A0A2R8QI77_DANRE	Periaxin OS=Danio rerio OX=7955 GN=prx PE=4 SV=1			0	75.67	FDISMPK				0.00385297	836.414	419.214	836.41	419.212	2	6	1.1.1.2977.5	24.3346	865.05	158.94	24.84	1.39	3694.67
1	194.25	194.25	79.32	49.37	47.18	tr|A0A2R8QI77|A0A2R8QI77_DANRE	Periaxin OS=Danio rerio OX=7955 GN=prx PE=4 SV=1			0	22.4	FDISMPK	Oxidation(M)@5			-0.00809625	852.397	427.206	852.405	427.21	2	5	1.1.1.2973.6	24.1053	139.93	119.29	23.81	0.64	1640.39
1	194.25	194.25	79.32	49.37	47.18	tr|A0A2R8QI77|A0A2R8QI77_DANRE	Periaxin OS=Danio rerio OX=7955 GN=prx PE=4 SV=1			0	19.47	FDISMPK	Oxidation(M)@5			0.0071015	852.412	427.213	852.405	427.21	2	5	1.1.1.2951.5	22.8337	176.17	123.22	22.07	1.1	1836.37
1	194.25	194.25	79.32	49.37	47.18	tr|A0A2R8QI77|A0A2R8QI77_DANRE	Periaxin OS=Danio rerio OX=7955 GN=prx PE=4 SV=1			0	99	FDPSLPK				-0.00217558	802.42	402.217	802.422	402.219	2	9	1.1.1.2901.6	19.9524	534.79	437.02	19.83	1.67	5342.25
1	194.25	194.25	79.32	49.37	47.18	tr|A0A2R8QI77|A0A2R8QI77_DANRE	Periaxin OS=Danio rerio OX=7955 GN=prx PE=4 SV=1			0	97.57	FDPSLPK				-0.00217558	802.42	402.217	802.422	402.219	2	8	1.1.1.2897.4	19.7201	534.79	513.55	19.83	1.67	5538.5
1	194.25	194.25	79.32	49.37	47.18	tr|A0A2R8QI77|A0A2R8QI77_DANRE	Periaxin OS=Danio rerio OX=7955 GN=prx PE=4 SV=1			0	96.01	FDPSLPK				-0.00217558	802.42	402.217	802.422	402.219	2	7	1.1.1.2903.4	20.0641	534.79	341.93	19.83	1.67	4566.5
1	194.25	194.25	79.32	49.37	47.18	tr|A0A2R8QI77|A0A2R8QI77_DANRE	Periaxin OS=Danio rerio OX=7955 GN=prx PE=4 SV=1			0	72.4	FDPSLPK				-0.00217558	802.42	402.217	802.422	402.219	2	7	1.1.1.2908.4	20.3506	534.79	240.07	19.83	1.67	3567.61
1	194.25	194.25	79.32	49.37	47.18	tr|A0A2R8QI77|A0A2R8QI77_DANRE	Periaxin OS=Danio rerio OX=7955 GN=prx PE=4 SV=1			0	65.78	FDPSLPK				-0.00217558	802.42	402.217	802.422	402.219	2	6	1.1.1.2905.5	20.1804	534.79	283.43	19.83	1.67	3842.94
1	194.25	194.25	79.32	49.37	47.18	tr|A0A2R8QI77|A0A2R8QI77_DANRE	Periaxin OS=Danio rerio OX=7955 GN=prx PE=4 SV=1			0	55.36	FDPSLPK				-0.00217558	802.42	402.217	802.422	402.219	2	6	1.1.1.2894.5	19.5508	534.79	331.97	19.83	1.67	3193.89
1	194.25	194.25	79.32	49.37	47.18	tr|A0A2R8QI77|A0A2R8QI77_DANRE	Periaxin OS=Danio rerio OX=7955 GN=prx PE=4 SV=1			0	23.35	FDPSLPK				-0.00217558	802.42	402.217	802.422	402.219	2	6	1.1.1.2918.5	20.9289	534.79	201.89	19.83	1.67	3222.17
1	194.25	194.25	79.32	49.37	47.18	tr|A0A2R8QI77|A0A2R8QI77_DANRE	Periaxin OS=Danio rerio OX=7955 GN=prx PE=4 SV=1			0	19.1	FDPSLPK				-0.00406873	802.418	402.216	802.422	402.219	2	6	2.1.1.2924.6	20.1534	558.76	255.85	19.85	0.69	3584.3
1	194.25	194.25	79.32	49.37	47.18	tr|A0A2R8QI77|A0A2R8QI77_DANRE	Periaxin OS=Danio rerio OX=7955 GN=prx PE=4 SV=1			0	99	FDVSLPK				0.000715232	804.439	403.227	804.438	403.226	2	10	1.1.1.2965.4	23.6397	1797.47	339.97	24.1	0.81	3346.95
1	194.25	194.25	79.32	49.37	47.18	tr|A0A2R8QI77|A0A2R8QI77_DANRE	Periaxin OS=Danio rerio OX=7955 GN=prx PE=4 SV=1			0	99	FDVSLPK				0.000715232	804.439	403.227	804.438	403.226	2	10	1.1.1.2967.5	23.7567	1797.47	671.37	24.1	0.81	5404.83
1	194.25	194.25	79.32	49.37	47.18	tr|A0A2R8QI77|A0A2R8QI77_DANRE	Periaxin OS=Danio rerio OX=7955 GN=prx PE=4 SV=1			0	99	FDVSLPK				0.000715232	804.439	403.227	804.438	403.226	2	10	1.1.1.2969.3	23.869	1797.47	1211.04	24.1	0.81	8932.92
1	194.25	194.25	79.32	49.37	47.18	tr|A0A2R8QI77|A0A2R8QI77_DANRE	Periaxin OS=Danio rerio OX=7955 GN=prx PE=4 SV=1			0	99	FDVSLPK				0.000715232	804.439	403.227	804.438	403.226	2	11	1.1.1.2971.6	23.9898	1797.47	1529.55	24.1	0.81	12144
1	194.25	194.25	79.32	49.37	47.18	tr|A0A2R8QI77|A0A2R8QI77_DANRE	Periaxin OS=Danio rerio OX=7955 GN=prx PE=4 SV=1			0	99	FDVSLPK				0.000715232	804.439	403.227	804.438	403.226	2	10	1.1.1.2973.4	24.102	1797.47	1767.75	24.1	0.81	13455.6
1	194.25	194.25	79.32	49.37	47.18	tr|A0A2R8QI77|A0A2R8QI77_DANRE	Periaxin OS=Danio rerio OX=7955 GN=prx PE=4 SV=1			0	99	FDVSLPK				0.000715232	804.439	403.227	804.438	403.226	2	10	1.1.1.2975.3	24.2158	1797.47	1634.9	24.1	0.81	11585.9
1	194.25	194.25	79.32	49.37	47.18	tr|A0A2R8QI77|A0A2R8QI77_DANRE	Periaxin OS=Danio rerio OX=7955 GN=prx PE=4 SV=1			0	99	FDVSLPK				0.000715232	804.439	403.227	804.438	403.226	2	10	1.1.1.2977.4	24.333	1797.47	1343.02	24.1	0.81	9780.75
1	194.25	194.25	79.32	49.37	47.18	tr|A0A2R8QI77|A0A2R8QI77_DANRE	Periaxin OS=Danio rerio OX=7955 GN=prx PE=4 SV=1			0	99	FDVSLPK				0.000715232	804.439	403.227	804.438	403.226	2	10	1.1.1.2979.5	24.4501	1797.47	1067.45	24.1	0.81	7585.88
1	194.25	194.25	79.32	49.37	47.18	tr|A0A2R8QI77|A0A2R8QI77_DANRE	Periaxin OS=Danio rerio OX=7955 GN=prx PE=4 SV=1			0	99	FDVSLPK				0.000715232	804.439	403.227	804.438	403.226	2	10	1.1.1.2981.4	24.5639	1797.47	860.52	24.1	0.81	7043.89
1	194.25	194.25	79.32	49.37	47.18	tr|A0A2R8QI77|A0A2R8QI77_DANRE	Periaxin OS=Danio rerio OX=7955 GN=prx PE=4 SV=1			0	99	FDVSLPK				0.000715232	804.439	403.227	804.438	403.226	2	11	1.1.1.2983.4	24.6796	1797.47	781.61	24.1	0.81	6184.17
1	194.25	194.25	79.32	49.37	47.18	tr|A0A2R8QI77|A0A2R8QI77_DANRE	Periaxin OS=Danio rerio OX=7955 GN=prx PE=4 SV=1			0	99	FDVSLPK				0.000715232	804.439	403.227	804.438	403.226	2	10	1.1.1.2985.4	24.7951	1797.47	663.74	24.1	0.81	5270.67
1	194.25	194.25	79.32	49.37	47.18	tr|A0A2R8QI77|A0A2R8QI77_DANRE	Periaxin OS=Danio rerio OX=7955 GN=prx PE=4 SV=1			0	99	FDVSLPK				0.000715232	804.439	403.227	804.438	403.226	2	10	1.1.1.2989.3	25.0244	1797.47	562.34	24.1	0.81	4676.57
1	194.25	194.25	79.32	49.37	47.18	tr|A0A2R8QI77|A0A2R8QI77_DANRE	Periaxin OS=Danio rerio OX=7955 GN=prx PE=4 SV=1			0	99	FDVSLPK				0.000715232	804.439	403.227	804.438	403.226	2	10	1.1.1.2991.4	25.1416	1797.47	468.65	24.1	0.81	3915.32
1	194.25	194.25	79.32	49.37	47.18	tr|A0A2R8QI77|A0A2R8QI77_DANRE	Periaxin OS=Danio rerio OX=7955 GN=prx PE=4 SV=1			0	99	FDVSLPK				-0.00166514	804.436	403.226	804.438	403.226	2	9	1.1.1.2995.3	25.3707	406.69	385.73	25.65	0.69	3547.65
1	194.25	194.25	79.32	49.37	47.18	tr|A0A2R8QI77|A0A2R8QI77_DANRE	Periaxin OS=Danio rerio OX=7955 GN=prx PE=4 SV=1			0	99	FDVSLPK				-0.00166514	804.436	403.226	804.438	403.226	2	10	1.1.1.3003.4	25.834	406.69	321.94	25.65	0.69	3269.37
1	194.25	194.25	79.32	49.37	47.18	tr|A0A2R8QI77|A0A2R8QI77_DANRE	Periaxin OS=Danio rerio OX=7955 GN=prx PE=4 SV=1			0	99	FDVSLPK				0.000715232	804.439	403.227	804.438	403.226	2	10	1.1.1.2987.4	24.9106	1797.47	594.99	24.1	0.81	4967.46
1	194.25	194.25	79.32	49.37	47.18	tr|A0A2R8QI77|A0A2R8QI77_DANRE	Periaxin OS=Danio rerio OX=7955 GN=prx PE=4 SV=1			0	99	FDVSLPK				0.000715232	804.439	403.227	804.438	403.226	2	9	1.1.1.2993.3	25.2553	1797.47	434.94	24.1	0.81	4158.52
1	194.25	194.25	79.32	49.37	47.18	tr|A0A2R8QI77|A0A2R8QI77_DANRE	Periaxin OS=Danio rerio OX=7955 GN=prx PE=4 SV=1			0	99	FDVSLPK				-0.00166514	804.436	403.226	804.438	403.226	2	8	1.1.1.2997.3	25.4861	406.69	374.62	25.65	0.69	3492.61
1	194.25	194.25	79.32	49.37	47.18	tr|A0A2R8QI77|A0A2R8QI77_DANRE	Periaxin OS=Danio rerio OX=7955 GN=prx PE=4 SV=1			0	99	FDVSLPK				0.00572011	804.444	403.229	804.438	403.226	2	9	1.1.1.3009.5	26.182	312.49	294.79	26.11	1.56	2702.38
1	194.25	194.25	79.32	49.37	47.18	tr|A0A2R8QI77|A0A2R8QI77_DANRE	Periaxin OS=Danio rerio OX=7955 GN=prx PE=4 SV=1			0	99	FDVSLPK				0.00228766	804.44	403.228	804.438	403.226	2	9	2.1.1.2992.4	24.0714	332.28	304.88	24.29	1.27	3369.38
1	194.25	194.25	79.32	49.37	47.18	tr|A0A2R8QI77|A0A2R8QI77_DANRE	Periaxin OS=Danio rerio OX=7955 GN=prx PE=4 SV=1			0	99	FDVSLPK				0.00572011	804.444	403.229	804.438	403.226	2	8	1.1.1.3017.3	26.6408	312.49	230.38	26.11	1.56	2438.93
1	194.25	194.25	79.32	49.37	47.18	tr|A0A2R8QI77|A0A2R8QI77_DANRE	Periaxin OS=Danio rerio OX=7955 GN=prx PE=4 SV=1			0	99	FDVSLPK				-0.00166514	804.436	403.226	804.438	403.226	2	8	1.1.1.3001.6	25.7217	406.69	404.89	25.65	0.69	2986.9
1	194.25	194.25	79.32	49.37	47.18	tr|A0A2R8QI77|A0A2R8QI77_DANRE	Periaxin OS=Danio rerio OX=7955 GN=prx PE=4 SV=1			0	99	FDVSLPK				0.00228766	804.44	403.228	804.438	403.226	2	8	2.1.1.2994.2	24.1837	332.28	295.88	24.29	1.27	3673.67
1	194.25	194.25	79.32	49.37	47.18	tr|A0A2R8QI77|A0A2R8QI77_DANRE	Periaxin OS=Danio rerio OX=7955 GN=prx PE=4 SV=1			0	99	FDVSLPK				0.00572011	804.444	403.229	804.438	403.226	2	8	1.1.1.3015.3	26.5253	312.49	227.33	26.11	1.56	2545.81
1	194.25	194.25	79.32	49.37	47.18	tr|A0A2R8QI77|A0A2R8QI77_DANRE	Periaxin OS=Danio rerio OX=7955 GN=prx PE=4 SV=1			0	99	FDVSLPK				-0.00129893	804.437	403.226	804.438	403.226	2	8	1.1.1.3007.3	26.063	406.69	296.67	25.48	0.75	2944.93
1	194.25	194.25	79.32	49.37	47.18	tr|A0A2R8QI77|A0A2R8QI77_DANRE	Periaxin OS=Danio rerio OX=7955 GN=prx PE=4 SV=1			0	99	FDVSLPK				0.00228766	804.44	403.228	804.438	403.226	2	9	2.1.1.2996.2	24.2991	332.28	330.6	24.29	1.27	3613.79
1	194.25	194.25	79.32	49.37	47.18	tr|A0A2R8QI77|A0A2R8QI77_DANRE	Periaxin OS=Danio rerio OX=7955 GN=prx PE=4 SV=1			0	99	FDVSLPK				-0.00166514	804.436	403.226	804.438	403.226	2	8	1.1.1.3005.4	25.9494	406.69	284.71	25.65	0.69	2880.58
1	194.25	194.25	79.32	49.37	47.18	tr|A0A2R8QI77|A0A2R8QI77_DANRE	Periaxin OS=Danio rerio OX=7955 GN=prx PE=4 SV=1			0	98.66	FDVSLPK				-0.000855867	804.437	403.226	804.438	403.226	2	7	1.1.1.3031.2	27.4479	178.56	177.19	27.27	0.58	1710.28
1	194.25	194.25	79.32	49.37	47.18	tr|A0A2R8QI77|A0A2R8QI77_DANRE	Periaxin OS=Danio rerio OX=7955 GN=prx PE=4 SV=1			0	93.62	FDVSLPK				0.00228766	804.44	403.228	804.438	403.226	2	7	2.1.1.2999.5	24.4771	332.28	265.13	24.29	1.27	2835.35
1	194.25	194.25	79.32	49.37	47.18	tr|A0A2R8QI77|A0A2R8QI77_DANRE	Periaxin OS=Danio rerio OX=7955 GN=prx PE=4 SV=1			0	84.9	FDVSLPK				0.00572011	804.444	403.229	804.438	403.226	2	6	1.1.1.3012.4	26.3535	312.49	260.1	26.11	1.56	2457.73
1	194.25	194.25	79.32	49.37	47.18	tr|A0A2R8QI77|A0A2R8QI77_DANRE	Periaxin OS=Danio rerio OX=7955 GN=prx PE=4 SV=1			0	68.79	FDVSLPK				-0.000855867	804.437	403.226	804.438	403.226	2	5	1.1.1.3026.3	27.1608	178.56	156.91	27.27	0.58	1930.94
1	194.25	194.25	79.32	49.37	47.18	tr|A0A2R8QI77|A0A2R8QI77_DANRE	Periaxin OS=Danio rerio OX=7955 GN=prx PE=4 SV=1			0	46.8	FDVSLPK				0.00494249	804.443	403.229	804.438	403.226	2	5	1.1.1.3079.2	30.2221	116.27	74.14	29.18	1.56	1088.31
1	194.25	194.25	79.32	49.37	47.18	tr|A0A2R8QI77|A0A2R8QI77_DANRE	Periaxin OS=Danio rerio OX=7955 GN=prx PE=4 SV=1			0	99	FDVSMPK				0.00388303	822.398	412.207	822.395	412.205	2	10	1.1.1.2933.5	21.795	620.34	618.93	21.78	0.92	6217.77
1	194.25	194.25	79.32	49.37	47.18	tr|A0A2R8QI77|A0A2R8QI77_DANRE	Periaxin OS=Danio rerio OX=7955 GN=prx PE=4 SV=1			0	99	FDVSMPK				0.00388303	822.398	412.207	822.395	412.205	2	10	1.1.1.2935.5	21.9105	620.34	561.83	21.78	0.92	5222.56
1	194.25	194.25	79.32	49.37	47.18	tr|A0A2R8QI77|A0A2R8QI77_DANRE	Periaxin OS=Danio rerio OX=7955 GN=prx PE=4 SV=1			0	99	FDVSMPK				0.00388303	822.398	412.207	822.395	412.205	2	10	1.1.1.2937.5	22.026	620.34	454.44	21.78	0.92	4315.25
1	194.25	194.25	79.32	49.37	47.18	tr|A0A2R8QI77|A0A2R8QI77_DANRE	Periaxin OS=Danio rerio OX=7955 GN=prx PE=4 SV=1			0	99	FDVSMPK				0.00388303	822.398	412.207	822.395	412.205	2	10	1.1.1.2941.7	22.2601	620.34	315.76	21.78	0.92	3252.27
1	194.25	194.25	79.32	49.37	47.18	tr|A0A2R8QI77|A0A2R8QI77_DANRE	Periaxin OS=Danio rerio OX=7955 GN=prx PE=4 SV=1			0	99	FDVSMPK				0.00388303	822.398	412.207	822.395	412.205	2	10	1.1.1.2944.4	22.4283	620.34	238.08	21.78	0.92	2689.78
1	194.25	194.25	79.32	49.37	47.18	tr|A0A2R8QI77|A0A2R8QI77_DANRE	Periaxin OS=Danio rerio OX=7955 GN=prx PE=4 SV=1			0	99	FDVSMPK				0.00388303	822.398	412.207	822.395	412.205	2	9	1.1.1.2939.5	22.1414	620.34	369.8	21.78	0.92	3911.73
1	194.25	194.25	79.32	49.37	47.18	tr|A0A2R8QI77|A0A2R8QI77_DANRE	Periaxin OS=Danio rerio OX=7955 GN=prx PE=4 SV=1			0	99	FDVSMPK	Oxidation(M)@5			0.00130537	838.391	420.203	838.389	420.202	2	9	1.1.1.2854.5	17.2565	549.02	544.37	17.25	1.44	6626.89
1	194.25	194.25	79.32	49.37	47.18	tr|A0A2R8QI77|A0A2R8QI77_DANRE	Periaxin OS=Danio rerio OX=7955 GN=prx PE=4 SV=1			0	99	FDVSMPK				0.00388303	822.398	412.207	822.395	412.205	2	10	1.1.1.2932.5	21.7371	620.34	598.54	21.78	0.92	5156.78
1	194.25	194.25	79.32	49.37	47.18	tr|A0A2R8QI77|A0A2R8QI77_DANRE	Periaxin OS=Danio rerio OX=7955 GN=prx PE=4 SV=1			0	99	FDVSMPK	Oxidation(M)@5			0.00130537	838.391	420.203	838.389	420.202	2	9	1.1.1.2856.4	17.3703	549.02	507.97	17.25	1.44	5616.48
1	194.25	194.25	79.32	49.37	47.18	tr|A0A2R8QI77|A0A2R8QI77_DANRE	Periaxin OS=Danio rerio OX=7955 GN=prx PE=4 SV=1			0	99	FDVSMPK	Oxidation(M)@5			0.00130537	838.391	420.203	838.389	420.202	2	9	1.1.1.2852.5	17.1416	549.02	436.1	17.25	1.44	5498.61
1	194.25	194.25	79.32	49.37	47.18	tr|A0A2R8QI77|A0A2R8QI77_DANRE	Periaxin OS=Danio rerio OX=7955 GN=prx PE=4 SV=1			0	99	FDVSMPK				0.00388303	822.398	412.207	822.395	412.205	2	9	1.1.1.2928.5	21.5062	620.34	335.82	21.78	0.92	3594.91
1	194.25	194.25	79.32	49.37	47.18	tr|A0A2R8QI77|A0A2R8QI77_DANRE	Periaxin OS=Danio rerio OX=7955 GN=prx PE=4 SV=1			0	93.41	FDVSMPK	Oxidation(M)@5			0.00130537	838.391	420.203	838.389	420.202	2	7	1.1.1.2881.4	18.8114	549.02	141.54	17.25	1.44	2759.47
1	194.25	194.25	79.32	49.37	47.18	tr|A0A2R8QI77|A0A2R8QI77_DANRE	Periaxin OS=Danio rerio OX=7955 GN=prx PE=4 SV=1			0	92.57	FDVSMPK	Oxidation(M)@5			0.00130537	838.391	420.203	838.389	420.202	2	8	1.1.1.2858.6	17.4891	549.02	370.83	17.25	1.44	4805.06
1	194.25	194.25	79.32	49.37	47.18	tr|A0A2R8QI77|A0A2R8QI77_DANRE	Periaxin OS=Danio rerio OX=7955 GN=prx PE=4 SV=1			0	89.7	FDVSMPK				0.00388303	822.398	412.207	822.395	412.205	2	8	1.1.1.2938.6	22.0855	620.34	420.08	21.78	0.92	4413.73
1	194.25	194.25	79.32	49.37	47.18	tr|A0A2R8QI77|A0A2R8QI77_DANRE	Periaxin OS=Danio rerio OX=7955 GN=prx PE=4 SV=1			0	83.16	FDVSMPK				0.00412717	822.399	412.207	822.395	412.205	2	8	1.1.1.2957.4	23.1782	187.34	181.11	23.17	0.4	2819.65
1	194.25	194.25	79.32	49.37	47.18	tr|A0A2R8QI77|A0A2R8QI77_DANRE	Periaxin OS=Danio rerio OX=7955 GN=prx PE=4 SV=1			0	80.67	FDVSMPK				0.00388303	822.398	412.207	822.395	412.205	2	7	1.1.1.2934.5	21.8528	620.34	605.25	21.78	0.92	5102.69
1	194.25	194.25	79.32	49.37	47.18	tr|A0A2R8QI77|A0A2R8QI77_DANRE	Periaxin OS=Danio rerio OX=7955 GN=prx PE=4 SV=1			0	73.27	FDVSMPK				0.00388303	822.398	412.207	822.395	412.205	2	8	1.1.1.2930.5	21.6218	620.34	552.53	21.78	0.92	5522.1
1	194.25	194.25	79.32	49.37	47.18	tr|A0A2R8QI77|A0A2R8QI77_DANRE	Periaxin OS=Danio rerio OX=7955 GN=prx PE=4 SV=1			0	71.19	FDVSMPK				0.00827756	822.403	412.209	822.395	412.205	2	6	1.1.1.2993.5	25.2586	149.25	87.59	24.67	0.81	1493.22
1	194.25	194.25	79.32	49.37	47.18	tr|A0A2R8QI77|A0A2R8QI77_DANRE	Periaxin OS=Danio rerio OX=7955 GN=prx PE=4 SV=1			0	65.76	FDVSMPK	Oxidation(M)@5			0.00130537	838.391	420.203	838.389	420.202	2	7	1.1.1.2860.6	17.6044	549.02	301.9	17.25	1.44	3735.31
1	194.25	194.25	79.32	49.37	47.18	tr|A0A2R8QI77|A0A2R8QI77_DANRE	Periaxin OS=Danio rerio OX=7955 GN=prx PE=4 SV=1			0	64.31	FDVSMPK				0.00388303	822.398	412.207	822.395	412.205	2	7	1.1.1.2928.6	21.5078	620.34	339.69	21.78	0.92	4082.41
1	194.25	194.25	79.32	49.37	47.18	tr|A0A2R8QI77|A0A2R8QI77_DANRE	Periaxin OS=Danio rerio OX=7955 GN=prx PE=4 SV=1			0	52.39	FDVSMPK				0.00388303	822.398	412.207	822.395	412.205	2	7	1.1.1.2942.3	22.3111	620.34	306.21	21.78	0.92	3331.65
1	194.25	194.25	79.32	49.37	47.18	tr|A0A2R8QI77|A0A2R8QI77_DANRE	Periaxin OS=Danio rerio OX=7955 GN=prx PE=4 SV=1			0	41.52	FDVSMPK				0.00711789	822.402	412.208	822.395	412.205	2	6	1.1.1.2948.6	22.6623	241.64	225.1	22.54	0.58	3023.81
1	194.25	194.25	79.32	49.37	47.18	tr|A0A2R8QI77|A0A2R8QI77_DANRE	Periaxin OS=Danio rerio OX=7955 GN=prx PE=4 SV=1			0	31.7	FDVSMPK				0.00388303	822.398	412.207	822.395	412.205	2	6	1.1.1.2944.5	22.4299	620.34	237.27	21.78	0.92	3170.08
1	194.25	194.25	79.32	49.37	47.18	tr|A0A2R8QI77|A0A2R8QI77_DANRE	Periaxin OS=Danio rerio OX=7955 GN=prx PE=4 SV=1			0	27.44	FDVSMPK				0.00388303	822.398	412.207	822.395	412.205	2	6	1.1.1.2940.3	22.1959	620.34	354.6	21.78	0.92	3931.33
1	194.25	194.25	79.32	49.37	47.18	tr|A0A2R8QI77|A0A2R8QI77_DANRE	Periaxin OS=Danio rerio OX=7955 GN=prx PE=4 SV=1			0	15.11	FDVSMPK				0.00711789	822.402	412.208	822.395	412.205	2	6	1.1.1.2953.5	22.9491	241.64	172.3	22.54	0.58	2647.09
1	194.25	194.25	79.32	49.37	47.18	tr|A0A2R8QI77|A0A2R8QI77_DANRE	Periaxin OS=Danio rerio OX=7955 GN=prx PE=4 SV=1			0	98.55	FEMPNLDVSLPK	Deamidated(N)@5			0.0150413	1389.7	695.857	1389.69	695.85	2	10	1.1.1.3199.11	37.1854	404.79	390.96	37.17	1.22	2709.03
1	194.25	194.25	79.32	49.37	47.18	tr|A0A2R8QI77|A0A2R8QI77_DANRE	Periaxin OS=Danio rerio OX=7955 GN=prx PE=4 SV=1			0	98.26	FEMPNLDVSLPK				-0.00131287	1388.7	695.357	1388.7	695.358	2	9	1.1.1.3209.6	37.7555	581.03	271.52	37.22	1.16	2158.89
1	194.25	194.25	79.32	49.37	47.18	tr|A0A2R8QI77|A0A2R8QI77_DANRE	Periaxin OS=Danio rerio OX=7955 GN=prx PE=4 SV=1			0	99	FHKPNISISLPK				0.00173772	1379.79	460.939	1379.79	460.938	3	11	1.1.1.2996.9	25.4384	586.44	578.39	25.42	0.69	3427.54
1	194.25	194.25	79.32	49.37	47.18	tr|A0A2R8QI77|A0A2R8QI77_DANRE	Periaxin OS=Danio rerio OX=7955 GN=prx PE=4 SV=1			0	99	FHKPNISISLPK				0.00173772	1379.79	460.939	1379.79	460.938	3	10	1.1.1.2994.10	25.3247	586.44	459.57	25.42	0.69	3067.41
1	194.25	194.25	79.32	49.37	47.18	tr|A0A2R8QI77|A0A2R8QI77_DANRE	Periaxin OS=Danio rerio OX=7955 GN=prx PE=4 SV=1			0	99	FHKPNISISLPK				0.00173772	1379.79	460.939	1379.79	460.938	3	10	1.1.1.3000.7	25.6657	586.44	433.92	25.42	0.69	2651.09
1	194.25	194.25	79.32	49.37	47.18	tr|A0A2R8QI77|A0A2R8QI77_DANRE	Periaxin OS=Danio rerio OX=7955 GN=prx PE=4 SV=1			0	88.02	FHKPNISISLPK				0.00173772	1379.79	460.939	1379.79	460.938	3	8	1.1.1.3003.10	25.844	586.44	278.57	25.42	0.69	2218.78
1	194.25	194.25	79.32	49.37	47.18	tr|A0A2R8QI77|A0A2R8QI77_DANRE	Periaxin OS=Danio rerio OX=7955 GN=prx PE=4 SV=1			0	99	FHMPSIDISLPGGR	Oxidation(M)@3			-0.00741645	1541.76	514.927	1541.77	514.929	3	14	1.1.1.3073.10	29.8886	515.95	464.78	29.81	1.45	2415.73
1	194.25	194.25	79.32	49.37	47.18	tr|A0A2R8QI77|A0A2R8QI77_DANRE	Periaxin OS=Danio rerio OX=7955 GN=prx PE=4 SV=1			0	99	FHMPSIDISLPGGR	Oxidation(M)@3			-0.00741645	1541.76	514.927	1541.77	514.929	3	14	1.1.1.3076.6	30.0602	515.95	362.29	29.81	1.45	2021.85
1	194.25	194.25	79.32	49.37	47.18	tr|A0A2R8QI77|A0A2R8QI77_DANRE	Periaxin OS=Danio rerio OX=7955 GN=prx PE=4 SV=1			0	99	FHMPSIDISLPGGR				0.00156038	1525.77	509.598	1525.77	509.598	3	13	1.1.1.3184.3	36.3035	345.94	338.88	36.35	0.87	1851.65
1	194.25	194.25	79.32	49.37	47.18	tr|A0A2R8QI77|A0A2R8QI77_DANRE	Periaxin OS=Danio rerio OX=7955 GN=prx PE=4 SV=1			0	99	FHMPSIDISLPGGR				0.00156038	1525.77	509.598	1525.77	509.598	3	13	1.1.1.3187.5	36.4806	345.94	288.2	36.35	0.87	1447.14
1	194.25	194.25	79.32	49.37	47.18	tr|A0A2R8QI77|A0A2R8QI77_DANRE	Periaxin OS=Danio rerio OX=7955 GN=prx PE=4 SV=1			0	99	FHMPSIDISLPGGR				0.00156038	1525.77	509.598	1525.77	509.598	3	13	1.1.1.3189.4	36.5948	345.94	224.72	36.35	0.87	1305.36
1	194.25	194.25	79.32	49.37	47.18	tr|A0A2R8QI77|A0A2R8QI77_DANRE	Periaxin OS=Danio rerio OX=7955 GN=prx PE=4 SV=1			0	99	FHMPSIDISLPGGR	Oxidation(M)@3			-0.00741645	1541.76	514.927	1541.77	514.929	3	10	1.1.1.3078.10	30.1776	515.95	349.35	29.81	1.45	2000.72
1	194.25	194.25	79.32	49.37	47.18	tr|A0A2R8QI77|A0A2R8QI77_DANRE	Periaxin OS=Danio rerio OX=7955 GN=prx PE=4 SV=1			0	96.49	FHMPSIDISLPGGR				0.00156038	1525.77	509.598	1525.77	509.598	3	7	1.1.1.3202.4	37.3474	345.94	126.89	36.35	0.87	775.369
1	194.25	194.25	79.32	49.37	47.18	tr|A0A2R8QI77|A0A2R8QI77_DANRE	Periaxin OS=Danio rerio OX=7955 GN=prx PE=4 SV=1			0	99	FHMPSIDISLPK	Oxidation(M)@3			-0.00499751	1399.71	467.578	1399.72	467.58	3	13	1.1.1.3063.3	29.2985	312.51	257.53	29.58	1.33	1419.44
1	194.25	194.25	79.32	49.37	47.18	tr|A0A2R8QI77|A0A2R8QI77_DANRE	Periaxin OS=Danio rerio OX=7955 GN=prx PE=4 SV=1			0	99	FHMPSIDISLPK	Oxidation(M)@3			-0.00499751	1399.71	467.578	1399.72	467.58	3	11	1.1.1.3061.4	29.1846	312.51	267.85	29.58	1.33	1882.14
1	194.25	194.25	79.32	49.37	47.18	tr|A0A2R8QI77|A0A2R8QI77_DANRE	Periaxin OS=Danio rerio OX=7955 GN=prx PE=4 SV=1			0	99	FHMPSIDISLPK	Oxidation(M)@3			-0.00499751	1399.71	467.578	1399.72	467.58	3	10	1.1.1.3059.5	29.0707	312.51	215.3	29.58	1.33	1769.88
1	194.25	194.25	79.32	49.37	47.18	tr|A0A2R8QI77|A0A2R8QI77_DANRE	Periaxin OS=Danio rerio OX=7955 GN=prx PE=4 SV=1			0	99	FHMPSIDISLPK	Oxidation(M)@3			-0.00499751	1399.71	467.578	1399.72	467.58	3	10	1.1.1.3067.5	29.5331	312.51	289.83	29.58	1.33	2017.92
1	194.25	194.25	79.32	49.37	47.18	tr|A0A2R8QI77|A0A2R8QI77_DANRE	Periaxin OS=Danio rerio OX=7955 GN=prx PE=4 SV=1			0	99	FHMPSIDISLPK	Oxidation(M)@3			-0.00499751	1399.71	467.578	1399.72	467.58	3	10	1.1.1.3082.3	30.3972	312.51	119.55	29.58	1.33	1359.45
1	194.25	194.25	79.32	49.37	47.18	tr|A0A2R8QI77|A0A2R8QI77_DANRE	Periaxin OS=Danio rerio OX=7955 GN=prx PE=4 SV=1			0	99	FHMPSIDISLPK	Oxidation(M)@3			-0.00499751	1399.71	467.578	1399.72	467.58	3	9	1.1.1.3069.4	29.6471	312.51	310.17	29.58	1.33	1733.17
1	194.25	194.25	79.32	49.37	47.18	tr|A0A2R8QI77|A0A2R8QI77_DANRE	Periaxin OS=Danio rerio OX=7955 GN=prx PE=4 SV=1			0	99	FHMPSIDISLPK	Oxidation(M)@3			-0.00499751	1399.71	467.578	1399.72	467.58	3	9	1.1.1.3057.4	28.9536	312.51	172.4	29.58	1.33	1785.86
1	194.25	194.25	79.32	49.37	47.18	tr|A0A2R8QI77|A0A2R8QI77_DANRE	Periaxin OS=Danio rerio OX=7955 GN=prx PE=4 SV=1			0	47.08	FHMPSIDISLPK	Oxidation(M)@3			-0.00499751	1399.71	467.578	1399.72	467.58	3	7	1.1.1.3055.5	28.8398	312.51	125	29.58	1.33	1952.53
1	194.25	194.25	79.32	49.37	47.18	tr|A0A2R8QI77|A0A2R8QI77_DANRE	Periaxin OS=Danio rerio OX=7955 GN=prx PE=4 SV=1			0	99	FHMPSLDISLPGGGAESDVDVAGHGGK	Oxidation(M)@3			0.00972808	2665.25	667.321	2665.24	667.318	4	13	1.1.1.3086.13	30.6552	499.7	284.82	31.14	1.45	1805.89
1	194.25	194.25	79.32	49.37	47.18	tr|A0A2R8QI77|A0A2R8QI77_DANRE	Periaxin OS=Danio rerio OX=7955 GN=prx PE=4 SV=1			0	99	FHMPSLDISLPGGGAESDVDVAGHGGK	Oxidation(M)@3			0.00972808	2665.25	667.321	2665.24	667.318	4	11	1.1.1.3090.20	30.889	499.7	412.42	31.14	1.45	2343.66
1	194.25	194.25	79.32	49.37	47.18	tr|A0A2R8QI77|A0A2R8QI77_DANRE	Periaxin OS=Danio rerio OX=7955 GN=prx PE=4 SV=1			0	98.17	FHMPSLDISLPGGGAESDVDVAGHGGK	Oxidation(M)@3			0.00972808	2665.25	667.321	2665.24	667.318	4	9	1.1.1.3098.15	31.3428	499.7	424.5	31.14	1.45	2594.43
1	194.25	194.25	79.32	49.37	47.18	tr|A0A2R8QI77|A0A2R8QI77_DANRE	Periaxin OS=Danio rerio OX=7955 GN=prx PE=4 SV=1			0	94.69	FHMPSLDISLPGGGAESDVDVAGHGGK				-0.00397903	2649.25	663.319	2649.25	663.32	4	9	1.1.1.3193.7	36.8313	309.44	204.21	36.47	1.68	1739.68
1	194.25	194.25	79.32	49.37	47.18	tr|A0A2R8QI77|A0A2R8QI77_DANRE	Periaxin OS=Danio rerio OX=7955 GN=prx PE=4 SV=1			0	66.37	FHMPSLDISLPGGGAESDVDVAGHGGK	Oxidation(M)@3			0.00972808	2665.25	667.321	2665.24	667.318	4	8	1.1.1.3104.14	31.6898	499.7	352.43	31.14	1.45	2398.85
1	194.25	194.25	79.32	49.37	47.18	tr|A0A2R8QI77|A0A2R8QI77_DANRE	Periaxin OS=Danio rerio OX=7955 GN=prx PE=4 SV=1			0	17.67	FHMPSLDISLPGGGAESDVDVAGHGGK	Oxidation(M)@3			0.00972808	2665.25	667.321	2665.24	667.318	4	7	1.1.1.3100.18	31.464	499.7	412.29	31.14	1.45	2347.56
1	194.25	194.25	79.32	49.37	47.18	tr|A0A2R8QI77|A0A2R8QI77_DANRE	Periaxin OS=Danio rerio OX=7955 GN=prx PE=4 SV=1			0	99	FHMPSLDISLPGGK	Oxidation(M)@3			0.00290651	1513.76	505.595	1513.76	505.594	3	13	1.1.1.3060.8	29.1335	1340.9	529.68	29.76	1.16	2152.2
1	194.25	194.25	79.32	49.37	47.18	tr|A0A2R8QI77|A0A2R8QI77_DANRE	Periaxin OS=Danio rerio OX=7955 GN=prx PE=4 SV=1			0	99	FHMPSLDISLPGGK	Oxidation(M)@3			0.00290651	1513.76	505.595	1513.76	505.594	3	16	1.1.1.3062.7	29.2475	1340.9	800.15	29.76	1.16	3644.98
1	194.25	194.25	79.32	49.37	47.18	tr|A0A2R8QI77|A0A2R8QI77_DANRE	Periaxin OS=Danio rerio OX=7955 GN=prx PE=4 SV=1			0	99	FHMPSLDISLPGGK	Oxidation(M)@3			0.00290651	1513.76	505.595	1513.76	505.594	3	15	1.1.1.3064.5	29.3596	1340.9	1035.33	29.76	1.16	4223.87
1	194.25	194.25	79.32	49.37	47.18	tr|A0A2R8QI77|A0A2R8QI77_DANRE	Periaxin OS=Danio rerio OX=7955 GN=prx PE=4 SV=1			0	99	FHMPSLDISLPGGK	Oxidation(M)@3			0.00290651	1513.76	505.595	1513.76	505.594	3	15	1.1.1.3066.6	29.4769	1340.9	1183.64	29.76	1.16	4069.6
1	194.25	194.25	79.32	49.37	47.18	tr|A0A2R8QI77|A0A2R8QI77_DANRE	Periaxin OS=Danio rerio OX=7955 GN=prx PE=4 SV=1			0	99	FHMPSLDISLPGGK	Oxidation(M)@3			0.00290651	1513.76	505.595	1513.76	505.594	3	17	1.1.1.3068.4	29.5943	1340.9	1172.24	29.76	1.16	4836.58
1	194.25	194.25	79.32	49.37	47.18	tr|A0A2R8QI77|A0A2R8QI77_DANRE	Periaxin OS=Danio rerio OX=7955 GN=prx PE=4 SV=1			0	99	FHMPSLDISLPGGK	Oxidation(M)@3			0.00290651	1513.76	505.595	1513.76	505.594	3	14	1.1.1.3070.5	29.7066	1340.9	1319.03	29.76	1.16	4793.85
1	194.25	194.25	79.32	49.37	47.18	tr|A0A2R8QI77|A0A2R8QI77_DANRE	Periaxin OS=Danio rerio OX=7955 GN=prx PE=4 SV=1			0	99	FHMPSLDISLPGGK	Oxidation(M)@3			0.00290651	1513.76	505.595	1513.76	505.594	3	17	1.1.1.3072.5	29.8289	1340.9	1292.81	29.76	1.16	4983.05
1	194.25	194.25	79.32	49.37	47.18	tr|A0A2R8QI77|A0A2R8QI77_DANRE	Periaxin OS=Danio rerio OX=7955 GN=prx PE=4 SV=1			0	99	FHMPSLDISLPGGK	Oxidation(M)@3			0.00290651	1513.76	505.595	1513.76	505.594	3	15	1.1.1.3074.4	29.9363	1340.9	1095.09	29.76	1.16	4358.55
1	194.25	194.25	79.32	49.37	47.18	tr|A0A2R8QI77|A0A2R8QI77_DANRE	Periaxin OS=Danio rerio OX=7955 GN=prx PE=4 SV=1			0	99	FHMPSLDISLPGGK	Oxidation(M)@3			0.00290651	1513.76	505.595	1513.76	505.594	3	16	1.1.1.3076.4	30.0536	1340.9	915.26	29.76	1.16	3885.08
1	194.25	194.25	79.32	49.37	47.18	tr|A0A2R8QI77|A0A2R8QI77_DANRE	Periaxin OS=Danio rerio OX=7955 GN=prx PE=4 SV=1			0	99	FHMPSLDISLPGGK	Oxidation(M)@3			0.00290651	1513.76	505.595	1513.76	505.594	3	14	1.1.1.3078.7	30.1726	1340.9	739.16	29.76	1.16	2766.16
1	194.25	194.25	79.32	49.37	47.18	tr|A0A2R8QI77|A0A2R8QI77_DANRE	Periaxin OS=Danio rerio OX=7955 GN=prx PE=4 SV=1			0	99	FHMPSLDISLPGGK	Oxidation(M)@3			0.00290651	1513.76	505.595	1513.76	505.594	3	15	1.1.1.3080.5	30.2849	1340.9	648.47	29.76	1.16	2677.58
1	194.25	194.25	79.32	49.37	47.18	tr|A0A2R8QI77|A0A2R8QI77_DANRE	Periaxin OS=Danio rerio OX=7955 GN=prx PE=4 SV=1			0	99	FHMPSLDISLPGGK	Oxidation(M)@3			0.00290651	1513.76	505.595	1513.76	505.594	3	16	1.1.1.3088.8	30.7527	1340.9	349.07	29.76	1.16	1989.42
1	194.25	194.25	79.32	49.37	47.18	tr|A0A2R8QI77|A0A2R8QI77_DANRE	Periaxin OS=Danio rerio OX=7955 GN=prx PE=4 SV=1			0	99	FHMPSLDISLPGGK	Oxidation(M)@3			0.00290651	1513.76	505.595	1513.76	505.594	3	11	1.1.1.3088.9	30.7544	1340.9	348.64	29.76	1.16	1334.26
1	194.25	194.25	79.32	49.37	47.18	tr|A0A2R8QI77|A0A2R8QI77_DANRE	Periaxin OS=Danio rerio OX=7955 GN=prx PE=4 SV=1			0	99	FHMPSLDISLPGGK				0.00118702	1497.77	500.263	1497.77	500.262	3	13	1.1.1.3179.3	36.0143	1277.38	526.24	36.47	0.69	2172.49
1	194.25	194.25	79.32	49.37	47.18	tr|A0A2R8QI77|A0A2R8QI77_DANRE	Periaxin OS=Danio rerio OX=7955 GN=prx PE=4 SV=1			0	99	FHMPSLDISLPGGK				0.00118702	1497.77	500.263	1497.77	500.262	3	16	1.1.1.3181.4	36.1317	1277.38	697.76	36.47	0.69	2956.02
1	194.25	194.25	79.32	49.37	47.18	tr|A0A2R8QI77|A0A2R8QI77_DANRE	Periaxin OS=Danio rerio OX=7955 GN=prx PE=4 SV=1			0	99	FHMPSLDISLPGGK				0.00118702	1497.77	500.263	1497.77	500.262	3	15	1.1.1.3183.5	36.249	1277.38	1037.32	36.47	0.69	4387.93
1	194.25	194.25	79.32	49.37	47.18	tr|A0A2R8QI77|A0A2R8QI77_DANRE	Periaxin OS=Danio rerio OX=7955 GN=prx PE=4 SV=1			0	99	FHMPSLDISLPGGK				0.00118702	1497.77	500.263	1497.77	500.262	3	14	1.1.1.3184.2	36.3018	1277.38	1141.95	36.47	0.69	2367.66
1	194.25	194.25	79.32	49.37	47.18	tr|A0A2R8QI77|A0A2R8QI77_DANRE	Periaxin OS=Danio rerio OX=7955 GN=prx PE=4 SV=1			0	99	FHMPSLDISLPGGK				0.00118702	1497.77	500.263	1497.77	500.262	3	15	1.1.1.3185.3	36.3613	1277.38	1272.27	36.47	0.69	5146.78
1	194.25	194.25	79.32	49.37	47.18	tr|A0A2R8QI77|A0A2R8QI77_DANRE	Periaxin OS=Danio rerio OX=7955 GN=prx PE=4 SV=1			0	99	FHMPSLDISLPGGK				0.00118702	1497.77	500.263	1497.77	500.262	3	16	1.1.1.3187.4	36.479	1277.38	1265.04	36.47	0.69	4799.05
1	194.25	194.25	79.32	49.37	47.18	tr|A0A2R8QI77|A0A2R8QI77_DANRE	Periaxin OS=Danio rerio OX=7955 GN=prx PE=4 SV=1			0	99	FHMPSLDISLPGGK				0.00118702	1497.77	500.263	1497.77	500.262	3	15	1.1.1.3189.3	36.5931	1277.38	1060.95	36.47	0.69	3673.58
1	194.25	194.25	79.32	49.37	47.18	tr|A0A2R8QI77|A0A2R8QI77_DANRE	Periaxin OS=Danio rerio OX=7955 GN=prx PE=4 SV=1			0	99	FHMPSLDISLPGGK				0.00118702	1497.77	500.263	1497.77	500.262	3	15	1.1.1.3191.3	36.7088	1277.38	878.7	36.47	0.69	3766.37
1	194.25	194.25	79.32	49.37	47.18	tr|A0A2R8QI77|A0A2R8QI77_DANRE	Periaxin OS=Danio rerio OX=7955 GN=prx PE=4 SV=1			0	99	FHMPSLDISLPGGK				0.00118702	1497.77	500.263	1497.77	500.262	3	14	1.1.1.3193.3	36.8246	1277.38	705.54	36.47	0.69	3114.7
1	194.25	194.25	79.32	49.37	47.18	tr|A0A2R8QI77|A0A2R8QI77_DANRE	Periaxin OS=Danio rerio OX=7955 GN=prx PE=4 SV=1			0	99	FHMPSLDISLPGGK				0.00118702	1497.77	500.263	1497.77	500.262	3	14	1.1.1.3195.3	36.9403	1277.38	552.1	36.47	0.69	2652.79
1	194.25	194.25	79.32	49.37	47.18	tr|A0A2R8QI77|A0A2R8QI77_DANRE	Periaxin OS=Danio rerio OX=7955 GN=prx PE=4 SV=1			0	99	FHMPSLDISLPGGK				0.00118702	1497.77	500.263	1497.77	500.262	3	13	1.1.1.3197.4	37.0579	1277.38	539.13	36.47	0.69	2273.66
1	194.25	194.25	79.32	49.37	47.18	tr|A0A2R8QI77|A0A2R8QI77_DANRE	Periaxin OS=Danio rerio OX=7955 GN=prx PE=4 SV=1			0	99	FHMPSLDISLPGGK				0.00118702	1497.77	500.263	1497.77	500.262	3	14	1.1.1.3199.3	37.1721	1277.38	480.56	36.47	0.69	2261.27
1	194.25	194.25	79.32	49.37	47.18	tr|A0A2R8QI77|A0A2R8QI77_DANRE	Periaxin OS=Danio rerio OX=7955 GN=prx PE=4 SV=1			0	99	FHMPSLDISLPGGK				0.00118702	1497.77	500.263	1497.77	500.262	3	12	1.1.1.3202.3	37.3458	1277.38	402.83	36.47	0.69	1937.83
1	194.25	194.25	79.32	49.37	47.18	tr|A0A2R8QI77|A0A2R8QI77_DANRE	Periaxin OS=Danio rerio OX=7955 GN=prx PE=4 SV=1			0	99	FHMPSLDISLPGGK				0.00118702	1497.77	500.263	1497.77	500.262	3	14	1.1.1.3205.3	37.5192	1277.38	356.21	36.47	0.69	1929.62
1	194.25	194.25	79.32	49.37	47.18	tr|A0A2R8QI77|A0A2R8QI77_DANRE	Periaxin OS=Danio rerio OX=7955 GN=prx PE=4 SV=1			0	99	FHMPSLDISLPGGK				0.00118702	1497.77	500.263	1497.77	500.262	3	13	1.1.1.3207.3	37.6349	1277.38	346.29	36.47	0.69	1607.1
1	194.25	194.25	79.32	49.37	47.18	tr|A0A2R8QI77|A0A2R8QI77_DANRE	Periaxin OS=Danio rerio OX=7955 GN=prx PE=4 SV=1			0	99	FHMPSLDISLPGGK				0.00118702	1497.77	500.263	1497.77	500.262	3	13	1.1.1.3210.2	37.8067	1277.38	298.56	36.47	0.69	1859.86
1	194.25	194.25	79.32	49.37	47.18	tr|A0A2R8QI77|A0A2R8QI77_DANRE	Periaxin OS=Danio rerio OX=7955 GN=prx PE=4 SV=1			0	99	FHMPSLDISLPGGK				-3.16443e-06	1497.77	500.262	1497.77	500.262	3	12	1.1.1.3212.2	37.9224	328.07	279	38.15	0.52	1766.27
1	194.25	194.25	79.32	49.37	47.18	tr|A0A2R8QI77|A0A2R8QI77_DANRE	Periaxin OS=Danio rerio OX=7955 GN=prx PE=4 SV=1			0	99	FHMPSLDISLPGGK				-3.16443e-06	1497.77	500.262	1497.77	500.262	3	13	1.1.1.3217.2	38.2117	328.07	305.38	38.15	0.52	1680.58
1	194.25	194.25	79.32	49.37	47.18	tr|A0A2R8QI77|A0A2R8QI77_DANRE	Periaxin OS=Danio rerio OX=7955 GN=prx PE=4 SV=1			0	99	FHMPSLDISLPGGK				-3.16443e-06	1497.77	500.262	1497.77	500.262	3	13	1.1.1.3219.3	38.329	328.07	227.74	38.15	0.52	1335.45
1	194.25	194.25	79.32	49.37	47.18	tr|A0A2R8QI77|A0A2R8QI77_DANRE	Periaxin OS=Danio rerio OX=7955 GN=prx PE=4 SV=1			0	48.39	FHMPSLDISLPGGK				0.0014907	1497.77	749.89	1497.77	749.89	2	8	1.1.1.3185.12	36.378	383.47	360.01	36.41	1.39	3690.32
1	194.25	194.25	79.32	49.37	47.18	tr|A0A2R8QI77|A0A2R8QI77_DANRE	Periaxin OS=Danio rerio OX=7955 GN=prx PE=4 SV=1			0	99	FHMPSLDISLPR	Oxidation(M)@3			-0.00241604	1427.72	476.914	1427.72	476.915	3	14	1.1.1.3076.3	30.0502	990.28	819.71	30.45	0.87	3997.11
1	194.25	194.25	79.32	49.37	47.18	tr|A0A2R8QI77|A0A2R8QI77_DANRE	Periaxin OS=Danio rerio OX=7955 GN=prx PE=4 SV=1			0	99	FHMPSLDISLPR	Oxidation(M)@3			-0.00241604	1427.72	476.914	1427.72	476.915	3	14	1.1.1.3078.4	30.1676	990.28	886.64	30.45	0.87	4214.97
1	194.25	194.25	79.32	49.37	47.18	tr|A0A2R8QI77|A0A2R8QI77_DANRE	Periaxin OS=Danio rerio OX=7955 GN=prx PE=4 SV=1			0	99	FHMPSLDISLPR	Oxidation(M)@3			-0.00241604	1427.72	476.914	1427.72	476.915	3	15	1.1.1.3080.4	30.2832	990.28	941.63	30.45	0.87	4241.77
1	194.25	194.25	79.32	49.37	47.18	tr|A0A2R8QI77|A0A2R8QI77_DANRE	Periaxin OS=Danio rerio OX=7955 GN=prx PE=4 SV=1			0	99	FHMPSLDISLPR	Oxidation(M)@3			-0.00241604	1427.72	476.914	1427.72	476.915	3	14	1.1.1.3082.4	30.3989	990.28	988.83	30.45	0.87	5054.4
1	194.25	194.25	79.32	49.37	47.18	tr|A0A2R8QI77|A0A2R8QI77_DANRE	Periaxin OS=Danio rerio OX=7955 GN=prx PE=4 SV=1			0	99	FHMPSLDISLPR	Oxidation(M)@3			-0.00241604	1427.72	476.914	1427.72	476.915	3	13	1.1.1.3084.5	30.5162	990.28	953.69	30.45	0.87	4775.76
1	194.25	194.25	79.32	49.37	47.18	tr|A0A2R8QI77|A0A2R8QI77_DANRE	Periaxin OS=Danio rerio OX=7955 GN=prx PE=4 SV=1			0	99	FHMPSLDISLPR	Oxidation(M)@3			-0.00241604	1427.72	476.914	1427.72	476.915	3	14	1.1.1.3088.5	30.7477	990.28	700.72	30.45	0.87	3674.08
1	194.25	194.25	79.32	49.37	47.18	tr|A0A2R8QI77|A0A2R8QI77_DANRE	Periaxin OS=Danio rerio OX=7955 GN=prx PE=4 SV=1			0	99	FHMPSLDISLPR	Oxidation(M)@3			-0.00241604	1427.72	476.914	1427.72	476.915	3	14	1.1.1.3090.5	30.864	990.28	565.71	30.45	0.87	2923.53
1	194.25	194.25	79.32	49.37	47.18	tr|A0A2R8QI77|A0A2R8QI77_DANRE	Periaxin OS=Danio rerio OX=7955 GN=prx PE=4 SV=1			0	99	FHMPSLDISLPR	Oxidation(M)@3			-0.00241604	1427.72	476.914	1427.72	476.915	3	13	1.1.1.3092.4	30.9783	990.28	471.11	30.45	0.87	2653.39
1	194.25	194.25	79.32	49.37	47.18	tr|A0A2R8QI77|A0A2R8QI77_DANRE	Periaxin OS=Danio rerio OX=7955 GN=prx PE=4 SV=1			0	99	FHMPSLDISLPR	Oxidation(M)@3			-0.00241604	1427.72	476.914	1427.72	476.915	3	14	1.1.1.3095.4	31.1508	990.28	341.46	30.45	0.87	2381.65
1	194.25	194.25	79.32	49.37	47.18	tr|A0A2R8QI77|A0A2R8QI77_DANRE	Periaxin OS=Danio rerio OX=7955 GN=prx PE=4 SV=1			0	99	FHMPSLDISLPR	Oxidation(M)@3			-0.00241604	1427.72	476.914	1427.72	476.915	3	11	1.1.1.3097.7	31.2713	990.28	308.45	30.45	0.87	2026.41
1	194.25	194.25	79.32	49.37	47.18	tr|A0A2R8QI77|A0A2R8QI77_DANRE	Periaxin OS=Danio rerio OX=7955 GN=prx PE=4 SV=1			0	99	FHMPSLDISLPR	Oxidation(M)@3			-0.00241604	1427.72	476.914	1427.72	476.915	3	12	1.1.1.3099.5	31.3842	990.28	280.44	30.45	0.87	1976.52
1	194.25	194.25	79.32	49.37	47.18	tr|A0A2R8QI77|A0A2R8QI77_DANRE	Periaxin OS=Danio rerio OX=7955 GN=prx PE=4 SV=1			0	99	FHMPSLDISLPR	Oxidation(M)@3			-0.00241604	1427.72	476.914	1427.72	476.915	3	13	1.1.1.3101.4	31.499	990.28	267.4	30.45	0.87	1826.26
1	194.25	194.25	79.32	49.37	47.18	tr|A0A2R8QI77|A0A2R8QI77_DANRE	Periaxin OS=Danio rerio OX=7955 GN=prx PE=4 SV=1			0	99	FHMPSLDISLPR				-0.00198235	1411.73	471.583	1411.73	471.583	3	12	1.1.1.3192.2	36.7649	772.75	465.87	37.05	0.75	2567.42
1	194.25	194.25	79.32	49.37	47.18	tr|A0A2R8QI77|A0A2R8QI77_DANRE	Periaxin OS=Danio rerio OX=7955 GN=prx PE=4 SV=1			0	99	FHMPSLDISLPR				-0.00198235	1411.73	471.583	1411.73	471.583	3	13	1.1.1.3194.3	36.8824	772.75	653.21	37.05	0.75	3076.7
1	194.25	194.25	79.32	49.37	47.18	tr|A0A2R8QI77|A0A2R8QI77_DANRE	Periaxin OS=Danio rerio OX=7955 GN=prx PE=4 SV=1			0	99	FHMPSLDISLPR				-0.00198235	1411.73	471.583	1411.73	471.583	3	14	1.1.1.3196.2	36.9966	772.75	770.69	37.05	0.75	4098.89
1	194.25	194.25	79.32	49.37	47.18	tr|A0A2R8QI77|A0A2R8QI77_DANRE	Periaxin OS=Danio rerio OX=7955 GN=prx PE=4 SV=1			0	99	FHMPSLDISLPR				-0.00198235	1411.73	471.583	1411.73	471.583	3	14	1.1.1.3198.2	37.1141	772.75	718.22	37.05	0.75	3530.84
1	194.25	194.25	79.32	49.37	47.18	tr|A0A2R8QI77|A0A2R8QI77_DANRE	Periaxin OS=Danio rerio OX=7955 GN=prx PE=4 SV=1			0	99	FHMPSLDISLPR				-0.00198235	1411.73	471.583	1411.73	471.583	3	14	1.1.1.3200.3	37.2301	772.75	706.9	37.05	0.75	3020.61
1	194.25	194.25	79.32	49.37	47.18	tr|A0A2R8QI77|A0A2R8QI77_DANRE	Periaxin OS=Danio rerio OX=7955 GN=prx PE=4 SV=1			0	99	FHMPSLDISLPR				-0.00198235	1411.73	471.583	1411.73	471.583	3	13	1.1.1.3202.2	37.3441	772.75	553.54	37.05	0.75	2622.69
1	194.25	194.25	79.32	49.37	47.18	tr|A0A2R8QI77|A0A2R8QI77_DANRE	Periaxin OS=Danio rerio OX=7955 GN=prx PE=4 SV=1			0	99	FHMPSLDISLPR				-0.00198235	1411.73	471.583	1411.73	471.583	3	14	1.1.1.3204.2	37.4614	772.75	406.03	37.05	0.75	2399.25
1	194.25	194.25	79.32	49.37	47.18	tr|A0A2R8QI77|A0A2R8QI77_DANRE	Periaxin OS=Danio rerio OX=7955 GN=prx PE=4 SV=1			0	99	FHMPSLDISLPR				-0.00198235	1411.73	471.583	1411.73	471.583	3	12	1.1.1.3208.2	37.6927	772.75	317.69	37.05	0.75	1966.63
1	194.25	194.25	79.32	49.37	47.18	tr|A0A2R8QI77|A0A2R8QI77_DANRE	Periaxin OS=Danio rerio OX=7955 GN=prx PE=4 SV=1			0	96.99	FHMPSLDISLPR				0.00278601	1411.73	471.584	1411.73	471.583	3	9	2.1.1.3229.3	37.7758	96.56	54.39	37.3	0.87	826.87
1	194.25	194.25	79.32	49.37	47.18	tr|A0A2R8QI77|A0A2R8QI77_DANRE	Periaxin OS=Danio rerio OX=7955 GN=prx PE=4 SV=1			0	71.16	FHMPSLDISLPR	Oxidation(M)@3			-0.00241604	1427.72	476.914	1427.72	476.915	3	7	1.1.1.3078.5	30.1692	990.28	887.38	30.45	0.87	1080.51
1	194.25	194.25	79.32	49.37	47.18	tr|A0A2R8QI77|A0A2R8QI77_DANRE	Periaxin OS=Danio rerio OX=7955 GN=prx PE=4 SV=1			0	99	FHMPSLDISPQR				-0.00383844	1426.7	476.574	1426.7	476.575	3	13	1.1.1.3082.4	30.3989	328.67	309.58	30.51	1.16	5054.4
1	194.25	194.25	79.32	49.37	47.18	tr|A0A2R8QI77|A0A2R8QI77_DANRE	Periaxin OS=Danio rerio OX=7955 GN=prx PE=4 SV=1			0	99	FHMPSLDISPQR				-0.00383844	1426.7	476.574	1426.7	476.575	3	13	1.1.1.3080.4	30.2832	328.67	217.29	30.51	1.16	4241.77
1	194.25	194.25	79.32	49.37	47.18	tr|A0A2R8QI77|A0A2R8QI77_DANRE	Periaxin OS=Danio rerio OX=7955 GN=prx PE=4 SV=1			0	99	FHMPSLDISPQR				-0.00383844	1426.7	476.574	1426.7	476.575	3	12	1.1.1.3090.5	30.864	328.67	226.61	30.51	1.16	2923.53
1	194.25	194.25	79.32	49.37	47.18	tr|A0A2R8QI77|A0A2R8QI77_DANRE	Periaxin OS=Danio rerio OX=7955 GN=prx PE=4 SV=1			0	99	FHMPSLDISPQR				-0.00383844	1426.7	476.574	1426.7	476.575	3	11	1.1.1.3095.4	31.1508	328.67	186.16	30.51	1.16	2381.65
1	194.25	194.25	79.32	49.37	47.18	tr|A0A2R8QI77|A0A2R8QI77_DANRE	Periaxin OS=Danio rerio OX=7955 GN=prx PE=4 SV=1			0	99	FHMPSLDISPQR				-0.00383844	1426.7	476.574	1426.7	476.575	3	11	1.1.1.3086.4	30.6302	328.67	288.4	30.51	1.16	3998.81
1	194.25	194.25	79.32	49.37	47.18	tr|A0A2R8QI77|A0A2R8QI77_DANRE	Periaxin OS=Danio rerio OX=7955 GN=prx PE=4 SV=1			0	99	FHMPSLDISPQR				-0.00383844	1426.7	476.574	1426.7	476.575	3	11	1.1.1.3084.5	30.5162	328.67	306.5	30.51	1.16	4775.76
1	194.25	194.25	79.32	49.37	47.18	tr|A0A2R8QI77|A0A2R8QI77_DANRE	Periaxin OS=Danio rerio OX=7955 GN=prx PE=4 SV=1			0	99	FHMPSLDISPQR				-0.00383844	1426.7	476.574	1426.7	476.575	3	10	1.1.1.3092.4	30.9783	328.67	186.47	30.51	1.16	2653.39
1	194.25	194.25	79.32	49.37	47.18	tr|A0A2R8QI77|A0A2R8QI77_DANRE	Periaxin OS=Danio rerio OX=7955 GN=prx PE=4 SV=1			0	99	FHMPSLDISPQR				-0.00383844	1426.7	476.574	1426.7	476.575	3	9	1.1.1.3101.4	31.499	328.67	116.46	30.51	1.16	1826.26
1	194.25	194.25	79.32	49.37	47.18	tr|A0A2R8QI77|A0A2R8QI77_DANRE	Periaxin OS=Danio rerio OX=7955 GN=prx PE=4 SV=1			0	97.66	FHMPSLDISPQR				-0.00383844	1426.7	476.574	1426.7	476.575	3	11	1.1.1.3078.4	30.1676	328.67	170.2	30.51	1.16	4214.97
1	194.25	194.25	79.32	49.37	47.18	tr|A0A2R8QI77|A0A2R8QI77_DANRE	Periaxin OS=Danio rerio OX=7955 GN=prx PE=4 SV=1			0	93.77	FHMPSLDISPQR	Oxidation(M)@3			0.00779338	1442.71	481.909	1442.7	481.906	3	8	1.1.1.2968.10	23.8228	234.41	167.39	23.29	1.39	1665.89
1	194.25	194.25	79.32	49.37	47.18	tr|A0A2R8QI77|A0A2R8QI77_DANRE	Periaxin OS=Danio rerio OX=7955 GN=prx PE=4 SV=1			0	85	FHMPSLDISPQR				-0.00383844	1426.7	476.574	1426.7	476.575	3	10	1.1.1.3076.3	30.0502	328.67	190.33	30.51	1.16	3997.11
1	194.25	194.25	79.32	49.37	47.18	tr|A0A2R8QI77|A0A2R8QI77_DANRE	Periaxin OS=Danio rerio OX=7955 GN=prx PE=4 SV=1			0	78.21	FHMPSLDISPQR				-0.00383844	1426.7	476.574	1426.7	476.575	3	8	1.1.1.3099.5	31.3842	328.67	117.18	30.51	1.16	1976.52
1	194.25	194.25	79.32	49.37	47.18	tr|A0A2R8QI77|A0A2R8QI77_DANRE	Periaxin OS=Danio rerio OX=7955 GN=prx PE=4 SV=1			0	70.34	FHMPSLDISPQR				-0.00383844	1426.7	476.574	1426.7	476.575	3	8	1.1.1.3097.7	31.2713	328.67	125.84	30.51	1.16	2026.41
1	194.25	194.25	79.32	49.37	47.18	tr|A0A2R8QI77|A0A2R8QI77_DANRE	Periaxin OS=Danio rerio OX=7955 GN=prx PE=4 SV=1			0	99	FHMPSVDISLPGGK	Oxidation(M)@3			-0.00130906	1499.74	500.922	1499.74	500.922	3	12	1.1.1.3013.9	26.4197	507.26	299.98	26.98	1.21	1807.27
1	194.25	194.25	79.32	49.37	47.18	tr|A0A2R8QI77|A0A2R8QI77_DANRE	Periaxin OS=Danio rerio OX=7955 GN=prx PE=4 SV=1			0	99	FHMPSVDISLPGGK	Oxidation(M)@3			-0.00130906	1499.74	500.922	1499.74	500.922	3	13	1.1.1.3019.12	26.7715	507.26	453.93	26.98	1.21	2176.98
1	194.25	194.25	79.32	49.37	47.18	tr|A0A2R8QI77|A0A2R8QI77_DANRE	Periaxin OS=Danio rerio OX=7955 GN=prx PE=4 SV=1			0	99	FHMPSVDISLPGGK	Oxidation(M)@3			-0.00130906	1499.74	500.922	1499.74	500.922	3	13	1.1.1.3023.9	26.9976	507.26	485.75	26.98	1.21	2468.92
1	194.25	194.25	79.32	49.37	47.18	tr|A0A2R8QI77|A0A2R8QI77_DANRE	Periaxin OS=Danio rerio OX=7955 GN=prx PE=4 SV=1			0	99	FHMPSVDISLPGGK	Oxidation(M)@3			-0.00261003	1499.74	500.921	1499.74	500.922	3	11	1.1.1.3028.12	27.2913	507.26	279.05	26.98	1.21	1627.14
1	194.25	194.25	79.32	49.37	47.18	tr|A0A2R8QI77|A0A2R8QI77_DANRE	Periaxin OS=Danio rerio OX=7955 GN=prx PE=4 SV=1			0	99	FHMPSVDISLPGGK				-0.00439341	1483.74	495.589	1483.75	495.59	3	13	1.1.1.3131.5	33.2397	450	362.1	33.4	0.93	1724.38
1	194.25	194.25	79.32	49.37	47.18	tr|A0A2R8QI77|A0A2R8QI77_DANRE	Periaxin OS=Danio rerio OX=7955 GN=prx PE=4 SV=1			0	99	FHMPSVDISLPGGK	Oxidation(M)@3			-0.00261003	1499.74	500.921	1499.74	500.922	3	11	1.1.1.3026.11	27.1741	507.26	313.11	26.98	1.21	1913.34
1	194.25	194.25	79.32	49.37	47.18	tr|A0A2R8QI77|A0A2R8QI77_DANRE	Periaxin OS=Danio rerio OX=7955 GN=prx PE=4 SV=1			0	94.22	FHMPSVDISLPGGK	Oxidation(M)@3			0.0127425	1499.76	500.926	1499.74	500.922	3	7	1.1.1.3222.3	38.5025	144.61	127.38	38.15	0.75	1231.68
1	194.25	194.25	79.32	49.37	47.18	tr|A0A2R8QI77|A0A2R8QI77_DANRE	Periaxin OS=Danio rerio OX=7955 GN=prx PE=4 SV=1			0	99	FHMPSVDISLPGGR	Oxidation(M)@3			0.00290515	1527.75	510.258	1527.75	510.257	3	17	1.1.1.3025.12	27.1229	1780.21	1475.05	27.39	0.87	5619.32
1	194.25	194.25	79.32	49.37	47.18	tr|A0A2R8QI77|A0A2R8QI77_DANRE	Periaxin OS=Danio rerio OX=7955 GN=prx PE=4 SV=1			0	99	FHMPSVDISLPGGR	Oxidation(M)@3			0.00290515	1527.75	510.258	1527.75	510.257	3	15	1.1.1.3027.7	27.2253	1780.21	1586.51	27.39	0.87	6532.7
1	194.25	194.25	79.32	49.37	47.18	tr|A0A2R8QI77|A0A2R8QI77_DANRE	Periaxin OS=Danio rerio OX=7955 GN=prx PE=4 SV=1			0	99	FHMPSVDISLPGGR	Oxidation(M)@3			0.00290515	1527.75	510.258	1527.75	510.257	3	14	1.1.1.3027.8	27.2269	1780.21	1589.85	27.39	0.87	5459.91
1	194.25	194.25	79.32	49.37	47.18	tr|A0A2R8QI77|A0A2R8QI77_DANRE	Periaxin OS=Danio rerio OX=7955 GN=prx PE=4 SV=1			0	99	FHMPSVDISLPGGR	Oxidation(M)@3			0.00290515	1527.75	510.258	1527.75	510.257	3	15	1.1.1.3029.8	27.3424	1780.21	1719.63	27.39	0.87	6975.21
1	194.25	194.25	79.32	49.37	47.18	tr|A0A2R8QI77|A0A2R8QI77_DANRE	Periaxin OS=Danio rerio OX=7955 GN=prx PE=4 SV=1			0	99	FHMPSVDISLPGGR	Oxidation(M)@3			0.00290515	1527.75	510.258	1527.75	510.257	3	16	1.1.1.3031.8	27.4579	1780.21	1763.46	27.39	0.87	6888.84
1	194.25	194.25	79.32	49.37	47.18	tr|A0A2R8QI77|A0A2R8QI77_DANRE	Periaxin OS=Danio rerio OX=7955 GN=prx PE=4 SV=1			0	99	FHMPSVDISLPGGR	Oxidation(M)@3			0.00290515	1527.75	510.258	1527.75	510.257	3	16	1.1.1.3033.7	27.5716	1780.21	1514.35	27.39	0.87	6413.93
1	194.25	194.25	79.32	49.37	47.18	tr|A0A2R8QI77|A0A2R8QI77_DANRE	Periaxin OS=Danio rerio OX=7955 GN=prx PE=4 SV=1			0	99	FHMPSVDISLPGGR	Oxidation(M)@3			0.00290515	1527.75	510.258	1527.75	510.257	3	15	1.1.1.3035.6	27.6856	1780.21	1200.51	27.39	0.87	5059.1
1	194.25	194.25	79.32	49.37	47.18	tr|A0A2R8QI77|A0A2R8QI77_DANRE	Periaxin OS=Danio rerio OX=7955 GN=prx PE=4 SV=1			0	99	FHMPSVDISLPGGR	Oxidation(M)@3			0.00290515	1527.75	510.258	1527.75	510.257	3	14	1.1.1.3037.6	27.8012	1780.21	993.88	27.39	0.87	4191.48
1	194.25	194.25	79.32	49.37	47.18	tr|A0A2R8QI77|A0A2R8QI77_DANRE	Periaxin OS=Danio rerio OX=7955 GN=prx PE=4 SV=1			0	99	FHMPSVDISLPGGR	Oxidation(M)@3			0.00290515	1527.75	510.258	1527.75	510.257	3	14	1.1.1.3037.7	27.8029	1780.21	990.87	27.39	0.87	3438.63
1	194.25	194.25	79.32	49.37	47.18	tr|A0A2R8QI77|A0A2R8QI77_DANRE	Periaxin OS=Danio rerio OX=7955 GN=prx PE=4 SV=1			0	99	FHMPSVDISLPGGR	Oxidation(M)@3			0.00290515	1527.75	510.258	1527.75	510.257	3	16	1.1.1.3039.7	27.9185	1780.21	853.8	27.39	0.87	3770.47
1	194.25	194.25	79.32	49.37	47.18	tr|A0A2R8QI77|A0A2R8QI77_DANRE	Periaxin OS=Danio rerio OX=7955 GN=prx PE=4 SV=1			0	99	FHMPSVDISLPGGR	Oxidation(M)@3			0.00290515	1527.75	510.258	1527.75	510.257	3	15	1.1.1.3041.9	28.0374	1780.21	725	27.39	0.87	3220.47
1	194.25	194.25	79.32	49.37	47.18	tr|A0A2R8QI77|A0A2R8QI77_DANRE	Periaxin OS=Danio rerio OX=7955 GN=prx PE=4 SV=1			0	99	FHMPSVDISLPGGR	Oxidation(M)@3			0.00290515	1527.75	510.258	1527.75	510.257	3	15	1.1.1.3043.7	28.1495	1780.21	702.81	27.39	0.87	3122.59
1	194.25	194.25	79.32	49.37	47.18	tr|A0A2R8QI77|A0A2R8QI77_DANRE	Periaxin OS=Danio rerio OX=7955 GN=prx PE=4 SV=1			0	99	FHMPSVDISLPGGR	Oxidation(M)@3			0.00290515	1527.75	510.258	1527.75	510.257	3	14	1.1.1.3045.9	28.2685	1780.21	630.27	27.39	0.87	2859.74
1	194.25	194.25	79.32	49.37	47.18	tr|A0A2R8QI77|A0A2R8QI77_DANRE	Periaxin OS=Danio rerio OX=7955 GN=prx PE=4 SV=1			0	99	FHMPSVDISLPGGR	Oxidation(M)@3			0.00290515	1527.75	510.258	1527.75	510.257	3	15	1.1.1.3047.10	28.3857	1780.21	562.97	27.39	0.87	2824.65
1	194.25	194.25	79.32	49.37	47.18	tr|A0A2R8QI77|A0A2R8QI77_DANRE	Periaxin OS=Danio rerio OX=7955 GN=prx PE=4 SV=1			0	99	FHMPSVDISLPGGR	Oxidation(M)@3			0.00290515	1527.75	510.258	1527.75	510.257	3	13	1.1.1.3051.8	28.6137	1780.21	484.25	27.39	0.87	2425.53
1	194.25	194.25	79.32	49.37	47.18	tr|A0A2R8QI77|A0A2R8QI77_DANRE	Periaxin OS=Danio rerio OX=7955 GN=prx PE=4 SV=1			0	99	FHMPSVDISLPGGR	Oxidation(M)@3			0.00290515	1527.75	510.258	1527.75	510.257	3	12	1.1.1.3053.9	28.7308	1780.21	439.06	27.39	0.87	2060.81
1	194.25	194.25	79.32	49.37	47.18	tr|A0A2R8QI77|A0A2R8QI77_DANRE	Periaxin OS=Danio rerio OX=7955 GN=prx PE=4 SV=1			0	99	FHMPSVDISLPGGR	Oxidation(M)@3			0.00290515	1527.75	510.258	1527.75	510.257	3	12	1.1.1.3055.6	28.8415	1780.21	428.25	27.39	0.87	2371.04
1	194.25	194.25	79.32	49.37	47.18	tr|A0A2R8QI77|A0A2R8QI77_DANRE	Periaxin OS=Danio rerio OX=7955 GN=prx PE=4 SV=1			0	99	FHMPSVDISLPGGR	Oxidation(M)@3			0.00290515	1527.75	510.258	1527.75	510.257	3	12	1.1.1.3057.6	28.957	1780.21	379.95	27.39	0.87	2008.92
1	194.25	194.25	79.32	49.37	47.18	tr|A0A2R8QI77|A0A2R8QI77_DANRE	Periaxin OS=Danio rerio OX=7955 GN=prx PE=4 SV=1			0	99	FHMPSVDISLPGGR	Oxidation(M)@3			-0.00670792	1527.74	510.255	1527.75	510.257	3	13	1.1.1.3063.5	29.3018	353.55	344.43	29.29	0.58	1875.99
1	194.25	194.25	79.32	49.37	47.18	tr|A0A2R8QI77|A0A2R8QI77_DANRE	Periaxin OS=Danio rerio OX=7955 GN=prx PE=4 SV=1			0	99	FHMPSVDISLPGGR	Oxidation(M)@3			-0.00670792	1527.74	510.255	1527.75	510.257	3	12	1.1.1.3065.7	29.4208	353.55	276.1	29.29	0.58	1693.09
1	194.25	194.25	79.32	49.37	47.18	tr|A0A2R8QI77|A0A2R8QI77_DANRE	Periaxin OS=Danio rerio OX=7955 GN=prx PE=4 SV=1			0	99	FHMPSVDISLPGGR	Oxidation(M)@3			-0.00551773	1527.74	510.256	1527.75	510.257	3	12	1.1.1.3071.8	29.7694	345.81	323.72	29.7	0.69	1589.4
1	194.25	194.25	79.32	49.37	47.18	tr|A0A2R8QI77|A0A2R8QI77_DANRE	Periaxin OS=Danio rerio OX=7955 GN=prx PE=4 SV=1			0	99	FHMPSVDISLPGGR				-6.90313e-05	1511.76	504.926	1511.76	504.926	3	16	1.1.1.3134.2	33.4102	1989.67	487.77	33.87	0.69	2350.39
1	194.25	194.25	79.32	49.37	47.18	tr|A0A2R8QI77|A0A2R8QI77_DANRE	Periaxin OS=Danio rerio OX=7955 GN=prx PE=4 SV=1			0	99	FHMPSVDISLPGGR				-6.90313e-05	1511.76	504.926	1511.76	504.926	3	15	1.1.1.3136.2	33.5245	1989.67	888.52	33.87	0.69	3669.88
1	194.25	194.25	79.32	49.37	47.18	tr|A0A2R8QI77|A0A2R8QI77_DANRE	Periaxin OS=Danio rerio OX=7955 GN=prx PE=4 SV=1			0	99	FHMPSVDISLPGGR				-6.90313e-05	1511.76	504.926	1511.76	504.926	3	17	1.1.1.3138.3	33.6422	1989.67	1408.12	33.87	0.69	6053.29
1	194.25	194.25	79.32	49.37	47.18	tr|A0A2R8QI77|A0A2R8QI77_DANRE	Periaxin OS=Danio rerio OX=7955 GN=prx PE=4 SV=1			0	99	FHMPSVDISLPGGR				-6.90313e-05	1511.76	504.926	1511.76	504.926	3	15	1.1.1.3140.5	33.7613	1989.67	1872.89	33.87	0.69	6052.49
1	194.25	194.25	79.32	49.37	47.18	tr|A0A2R8QI77|A0A2R8QI77_DANRE	Periaxin OS=Danio rerio OX=7955 GN=prx PE=4 SV=1			0	99	FHMPSVDISLPGGR				-6.90313e-05	1511.76	504.926	1511.76	504.926	3	15	1.1.1.3142.3	33.8738	1989.67	1983.89	33.87	0.69	8837.63
1	194.25	194.25	79.32	49.37	47.18	tr|A0A2R8QI77|A0A2R8QI77_DANRE	Periaxin OS=Danio rerio OX=7955 GN=prx PE=4 SV=1			0	99	FHMPSVDISLPGGR				-6.90313e-05	1511.76	504.926	1511.76	504.926	3	15	1.1.1.3144.4	33.9911	1989.67	1795.02	33.87	0.69	6840.63
1	194.25	194.25	79.32	49.37	47.18	tr|A0A2R8QI77|A0A2R8QI77_DANRE	Periaxin OS=Danio rerio OX=7955 GN=prx PE=4 SV=1			0	99	FHMPSVDISLPGGR				-6.90313e-05	1511.76	504.926	1511.76	504.926	3	14	1.1.1.3146.4	34.1068	1989.67	1387.13	33.87	0.69	6006.24
1	194.25	194.25	79.32	49.37	47.18	tr|A0A2R8QI77|A0A2R8QI77_DANRE	Periaxin OS=Danio rerio OX=7955 GN=prx PE=4 SV=1			0	99	FHMPSVDISLPGGR				-6.90313e-05	1511.76	504.926	1511.76	504.926	3	16	1.1.1.3148.3	34.2241	1989.67	1095.1	33.87	0.69	4341.28
1	194.25	194.25	79.32	49.37	47.18	tr|A0A2R8QI77|A0A2R8QI77_DANRE	Periaxin OS=Danio rerio OX=7955 GN=prx PE=4 SV=1			0	99	FHMPSVDISLPGGR				-6.90313e-05	1511.76	504.926	1511.76	504.926	3	15	1.1.1.3150.2	34.3366	1989.67	931.53	33.87	0.69	3840.19
1	194.25	194.25	79.32	49.37	47.18	tr|A0A2R8QI77|A0A2R8QI77_DANRE	Periaxin OS=Danio rerio OX=7955 GN=prx PE=4 SV=1			0	99	FHMPSVDISLPGGR				-6.90313e-05	1511.76	504.926	1511.76	504.926	3	15	1.1.1.3152.3	34.4524	1989.67	767.53	33.87	0.69	3541.2
1	194.25	194.25	79.32	49.37	47.18	tr|A0A2R8QI77|A0A2R8QI77_DANRE	Periaxin OS=Danio rerio OX=7955 GN=prx PE=4 SV=1			0	99	FHMPSVDISLPGGR				-6.90313e-05	1511.76	504.926	1511.76	504.926	3	14	1.1.1.3154.3	34.5684	1989.67	725.57	33.87	0.69	3130.89
1	194.25	194.25	79.32	49.37	47.18	tr|A0A2R8QI77|A0A2R8QI77_DANRE	Periaxin OS=Danio rerio OX=7955 GN=prx PE=4 SV=1			0	99	FHMPSVDISLPGGR				-6.90313e-05	1511.76	504.926	1511.76	504.926	3	15	1.1.1.3156.5	34.6876	1989.67	656.57	33.87	0.69	2810.25
1	194.25	194.25	79.32	49.37	47.18	tr|A0A2R8QI77|A0A2R8QI77_DANRE	Periaxin OS=Danio rerio OX=7955 GN=prx PE=4 SV=1			0	99	FHMPSVDISLPGGR				0.00154419	1511.76	504.926	1511.76	504.926	3	15	1.1.1.3158.3	34.8001	571.52	554.35	34.97	1.16	2529.21
1	194.25	194.25	79.32	49.37	47.18	tr|A0A2R8QI77|A0A2R8QI77_DANRE	Periaxin OS=Danio rerio OX=7955 GN=prx PE=4 SV=1			0	99	FHMPSVDISLPGGR				-0.000927742	1511.75	504.925	1511.76	504.926	3	14	1.1.1.3160.2	34.9141	571.52	569.13	34.97	1.68	2447.03
1	194.25	194.25	79.32	49.37	47.18	tr|A0A2R8QI77|A0A2R8QI77_DANRE	Periaxin OS=Danio rerio OX=7955 GN=prx PE=4 SV=1			0	99	FHMPSVDISLPGGR				-0.000927742	1511.75	504.925	1511.76	504.926	3	15	1.1.1.3162.3	35.0316	571.52	530.76	34.97	1.68	2426.13
1	194.25	194.25	79.32	49.37	47.18	tr|A0A2R8QI77|A0A2R8QI77_DANRE	Periaxin OS=Danio rerio OX=7955 GN=prx PE=4 SV=1			0	99	FHMPSVDISLPGGR				-0.000927742	1511.75	504.925	1511.76	504.926	3	15	1.1.1.3164.2	35.1489	571.52	483.09	34.97	1.68	2176.78
1	194.25	194.25	79.32	49.37	47.18	tr|A0A2R8QI77|A0A2R8QI77_DANRE	Periaxin OS=Danio rerio OX=7955 GN=prx PE=4 SV=1			0	99	FHMPSVDISLPGGR				-0.000927742	1511.75	504.925	1511.76	504.926	3	15	1.1.1.3166.3	35.2696	571.52	463.15	34.97	1.68	2021.73
1	194.25	194.25	79.32	49.37	47.18	tr|A0A2R8QI77|A0A2R8QI77_DANRE	Periaxin OS=Danio rerio OX=7955 GN=prx PE=4 SV=1			0	99	FHMPSVDISLPGGR				-0.000927742	1511.75	504.925	1511.76	504.926	3	15	1.1.1.3168.3	35.3785	571.52	464.75	34.97	1.68	1964.23
1	194.25	194.25	79.32	49.37	47.18	tr|A0A2R8QI77|A0A2R8QI77_DANRE	Periaxin OS=Danio rerio OX=7955 GN=prx PE=4 SV=1			0	99	FHMPSVDISLPGGR				-0.000927742	1511.75	504.925	1511.76	504.926	3	15	1.1.1.3170.2	35.4959	571.52	436.26	34.97	1.68	1952.55
1	194.25	194.25	79.32	49.37	47.18	tr|A0A2R8QI77|A0A2R8QI77_DANRE	Periaxin OS=Danio rerio OX=7955 GN=prx PE=4 SV=1			0	99	FHMPSVDISLPGGR				-0.000927742	1511.75	504.925	1511.76	504.926	3	14	1.1.1.3173.4	35.6694	571.52	353.4	34.97	1.68	1745.98
1	194.25	194.25	79.32	49.37	47.18	tr|A0A2R8QI77|A0A2R8QI77_DANRE	Periaxin OS=Danio rerio OX=7955 GN=prx PE=4 SV=1			0	99	FHMPSVDISLPGGR				-0.000927742	1511.75	504.925	1511.76	504.926	3	14	1.1.1.3176.2	35.8412	571.52	336.28	34.97	1.68	1729.01
1	194.25	194.25	79.32	49.37	47.18	tr|A0A2R8QI77|A0A2R8QI77_DANRE	Periaxin OS=Danio rerio OX=7955 GN=prx PE=4 SV=1			0	99	FHMPSVDISLPGGR				-0.000927742	1511.75	504.925	1511.76	504.926	3	13	1.1.1.3180.2	36.0705	571.52	319.11	34.97	1.68	1563.21
1	194.25	194.25	79.32	49.37	47.18	tr|A0A2R8QI77|A0A2R8QI77_DANRE	Periaxin OS=Danio rerio OX=7955 GN=prx PE=4 SV=1			0	99	FHMPSVDISLPGGR	Oxidation(M)@3			-0.00670792	1527.74	510.255	1527.75	510.257	3	11	1.1.1.3061.7	29.1896	353.55	353.08	29.29	0.58	1762.07
1	194.25	194.25	79.32	49.37	47.18	tr|A0A2R8QI77|A0A2R8QI77_DANRE	Periaxin OS=Danio rerio OX=7955 GN=prx PE=4 SV=1			0	99	FHMPSVDISLPGGR	Oxidation(M)@3			0.00290515	1527.75	510.258	1527.75	510.257	3	11	1.1.1.3041.10	28.039	1780.21	723.97	27.39	0.87	2828.85
1	194.25	194.25	79.32	49.37	47.18	tr|A0A2R8QI77|A0A2R8QI77_DANRE	Periaxin OS=Danio rerio OX=7955 GN=prx PE=4 SV=1			0	99	FHMPSVDISLPGGR	Oxidation(M)@3			-0.000665415	1527.75	510.257	1527.75	510.257	3	11	1.1.1.3086.5	30.6319	222.29	217.09	30.33	1.56	1764.57
1	194.25	194.25	79.32	49.37	47.18	tr|A0A2R8QI77|A0A2R8QI77_DANRE	Periaxin OS=Danio rerio OX=7955 GN=prx PE=4 SV=1			0	99	FHMPSVDISLPGGR	Oxidation(M)@3			-0.00551773	1527.74	510.256	1527.75	510.257	3	9	1.1.1.3073.9	29.8869	345.81	301.34	29.7	0.69	1572.71
1	194.25	194.25	79.32	49.37	47.18	tr|A0A2R8QI77|A0A2R8QI77_DANRE	Periaxin OS=Danio rerio OX=7955 GN=prx PE=4 SV=1			0	99	FHMPSVDISLPGGR	Oxidation(M)@3			-0.0201662	1527.73	510.251	1527.75	510.257	3	10	1.1.1.3077.7	30.1147	213.42	195.32	30.8	1.04	1909.74
1	194.25	194.25	79.32	49.37	47.18	tr|A0A2R8QI77|A0A2R8QI77_DANRE	Periaxin OS=Danio rerio OX=7955 GN=prx PE=4 SV=1			0	99	FHMPSVDISLPGGR	Oxidation(M)@3			-0.00551773	1527.74	510.256	1527.75	510.257	3	10	1.1.1.3075.7	29.9991	345.81	226.06	29.7	0.69	1823.86
1	194.25	194.25	79.32	49.37	47.18	tr|A0A2R8QI77|A0A2R8QI77_DANRE	Periaxin OS=Danio rerio OX=7955 GN=prx PE=4 SV=1			0	99	FHMPSVDISLPGGR	Oxidation(M)@3			-0.000665415	1527.75	510.257	1527.75	510.257	3	10	1.1.1.3081.7	30.3459	222.29	222.03	30.33	1.56	1963.43
1	194.25	194.25	79.32	49.37	47.18	tr|A0A2R8QI77|A0A2R8QI77_DANRE	Periaxin OS=Danio rerio OX=7955 GN=prx PE=4 SV=1			0	99	FHMPSVDISLPGGR	Oxidation(M)@3			0.00290515	1527.75	510.258	1527.75	510.257	3	10	1.1.1.3050.8	28.5558	1780.21	540.98	27.39	0.87	2337.35
1	194.25	194.25	79.32	49.37	47.18	tr|A0A2R8QI77|A0A2R8QI77_DANRE	Periaxin OS=Danio rerio OX=7955 GN=prx PE=4 SV=1			0	99	FHMPSVDISLPGGR	Oxidation(M)@3			-0.00670792	1527.74	510.255	1527.75	510.257	3	9	1.1.1.3067.9	29.5398	353.55	278.08	29.29	0.58	1717.68
1	194.25	194.25	79.32	49.37	47.18	tr|A0A2R8QI77|A0A2R8QI77_DANRE	Periaxin OS=Danio rerio OX=7955 GN=prx PE=4 SV=1			0	99	FHMPSVDISLPGGR	Oxidation(M)@3			0.00290515	1527.75	510.258	1527.75	510.257	3	10	1.1.1.3045.10	28.2702	1780.21	629.79	27.39	0.87	2800.46
1	194.25	194.25	79.32	49.37	47.18	tr|A0A2R8QI77|A0A2R8QI77_DANRE	Periaxin OS=Danio rerio OX=7955 GN=prx PE=4 SV=1			0	98.44	FHMPSVDISLPGGR	Oxidation(M)@3			-0.000665415	1527.75	510.257	1527.75	510.257	3	9	1.1.1.3094.7	31.0983	222.29	170.69	30.33	1.56	1399.44
1	194.25	194.25	79.32	49.37	47.18	tr|A0A2R8QI77|A0A2R8QI77_DANRE	Periaxin OS=Danio rerio OX=7955 GN=prx PE=4 SV=1			0	95.62	FHMPSVDISLPGGR	Oxidation(M)@3			0.00290515	1527.75	510.258	1527.75	510.257	3	9	1.1.1.3047.11	28.3874	1780.21	563.35	27.39	0.87	2674.28
1	194.25	194.25	79.32	49.37	47.18	tr|A0A2R8QI77|A0A2R8QI77_DANRE	Periaxin OS=Danio rerio OX=7955 GN=prx PE=4 SV=1			0	95.58	FHMPSVDISLPGGR	Oxidation(M)@3			0.00290515	1527.75	510.258	1527.75	510.257	3	9	1.1.1.3052.9	28.673	1780.21	449.56	27.39	0.87	2167.59
1	194.25	194.25	79.32	49.37	47.18	tr|A0A2R8QI77|A0A2R8QI77_DANRE	Periaxin OS=Danio rerio OX=7955 GN=prx PE=4 SV=1			0	99	FHMPSVDISLPK	Oxidation(M)@3			0.000282327	1385.7	462.908	1385.7	462.908	3	11	1.1.1.3012.10	26.3635	997.46	256.79	26.98	1.1	1799.86
1	194.25	194.25	79.32	49.37	47.18	tr|A0A2R8QI77|A0A2R8QI77_DANRE	Periaxin OS=Danio rerio OX=7955 GN=prx PE=4 SV=1			0	99	FHMPSVDISLPK	Oxidation(M)@3			0.000282327	1385.7	462.908	1385.7	462.908	3	14	1.1.1.3016.9	26.593	997.46	643.78	26.98	1.1	3635.1
1	194.25	194.25	79.32	49.37	47.18	tr|A0A2R8QI77|A0A2R8QI77_DANRE	Periaxin OS=Danio rerio OX=7955 GN=prx PE=4 SV=1			0	99	FHMPSVDISLPK	Oxidation(M)@3			0.000282327	1385.7	462.908	1385.7	462.908	3	13	1.1.1.3018.7	26.7053	997.46	731.07	26.98	1.1	3451.02
1	194.25	194.25	79.32	49.37	47.18	tr|A0A2R8QI77|A0A2R8QI77_DANRE	Periaxin OS=Danio rerio OX=7955 GN=prx PE=4 SV=1			0	99	FHMPSVDISLPK	Oxidation(M)@3			0.000282327	1385.7	462.908	1385.7	462.908	3	15	1.1.1.3020.8	26.8226	997.46	822.61	26.98	1.1	4138.28
1	194.25	194.25	79.32	49.37	47.18	tr|A0A2R8QI77|A0A2R8QI77_DANRE	Periaxin OS=Danio rerio OX=7955 GN=prx PE=4 SV=1			0	99	FHMPSVDISLPK	Oxidation(M)@3			0.000282327	1385.7	462.908	1385.7	462.908	3	15	1.1.1.3022.9	26.9399	997.46	927.59	26.98	1.1	4166.28
1	194.25	194.25	79.32	49.37	47.18	tr|A0A2R8QI77|A0A2R8QI77_DANRE	Periaxin OS=Danio rerio OX=7955 GN=prx PE=4 SV=1			0	99	FHMPSVDISLPK	Oxidation(M)@3			-0.00144798	1385.7	462.907	1385.7	462.908	3	15	1.1.1.3024.6	27.0503	997.46	968.36	26.98	1.1	4513.01
1	194.25	194.25	79.32	49.37	47.18	tr|A0A2R8QI77|A0A2R8QI77_DANRE	Periaxin OS=Danio rerio OX=7955 GN=prx PE=4 SV=1			0	99	FHMPSVDISLPK	Oxidation(M)@3			-0.00144798	1385.7	462.907	1385.7	462.908	3	15	1.1.1.3026.9	27.1708	997.46	872.56	26.98	1.1	3902.33
1	194.25	194.25	79.32	49.37	47.18	tr|A0A2R8QI77|A0A2R8QI77_DANRE	Periaxin OS=Danio rerio OX=7955 GN=prx PE=4 SV=1			0	99	FHMPSVDISLPK	Oxidation(M)@3			-0.00144798	1385.7	462.907	1385.7	462.908	3	13	1.1.1.3028.7	27.2829	997.46	745.8	26.98	1.1	3114.59
1	194.25	194.25	79.32	49.37	47.18	tr|A0A2R8QI77|A0A2R8QI77_DANRE	Periaxin OS=Danio rerio OX=7955 GN=prx PE=4 SV=1			0	99	FHMPSVDISLPK	Oxidation(M)@3			-0.00144798	1385.7	462.907	1385.7	462.908	3	15	1.1.1.3030.6	27.3968	997.46	612.37	26.98	1.1	2984.63
1	194.25	194.25	79.32	49.37	47.18	tr|A0A2R8QI77|A0A2R8QI77_DANRE	Periaxin OS=Danio rerio OX=7955 GN=prx PE=4 SV=1			0	99	FHMPSVDISLPK	Oxidation(M)@3			-0.00144798	1385.7	462.907	1385.7	462.908	3	14	1.1.1.3032.8	27.5156	997.46	479.81	26.98	1.1	2705.28
1	194.25	194.25	79.32	49.37	47.18	tr|A0A2R8QI77|A0A2R8QI77_DANRE	Periaxin OS=Danio rerio OX=7955 GN=prx PE=4 SV=1			0	99	FHMPSVDISLPK	Oxidation(M)@3			-0.00144798	1385.7	462.907	1385.7	462.908	3	14	1.1.1.3034.10	27.6344	997.46	407.49	26.98	1.1	2213.08
1	194.25	194.25	79.32	49.37	47.18	tr|A0A2R8QI77|A0A2R8QI77_DANRE	Periaxin OS=Danio rerio OX=7955 GN=prx PE=4 SV=1			0	99	FHMPSVDISLPK	Oxidation(M)@3			-0.00144798	1385.7	462.907	1385.7	462.908	3	12	1.1.1.3036.8	27.7467	997.46	375.82	26.98	1.1	2258.38
1	194.25	194.25	79.32	49.37	47.18	tr|A0A2R8QI77|A0A2R8QI77_DANRE	Periaxin OS=Danio rerio OX=7955 GN=prx PE=4 SV=1			0	99	FHMPSVDISLPK	Oxidation(M)@3			-0.00144798	1385.7	462.907	1385.7	462.908	3	13	1.1.1.3038.7	27.8607	997.46	347.98	26.98	1.1	2100.7
1	194.25	194.25	79.32	49.37	47.18	tr|A0A2R8QI77|A0A2R8QI77_DANRE	Periaxin OS=Danio rerio OX=7955 GN=prx PE=4 SV=1			0	99	FHMPSVDISLPK				-0.00112295	1369.71	457.576	1369.71	457.576	3	12	1.1.1.3131.4	33.238	817.06	356.4	33.52	0.7	2215.28
1	194.25	194.25	79.32	49.37	47.18	tr|A0A2R8QI77|A0A2R8QI77_DANRE	Periaxin OS=Danio rerio OX=7955 GN=prx PE=4 SV=1			0	99	FHMPSVDISLPK				-0.00112295	1369.71	457.576	1369.71	457.576	3	15	1.1.1.3133.4	33.3539	817.06	566.37	33.52	0.7	3300.24
1	194.25	194.25	79.32	49.37	47.18	tr|A0A2R8QI77|A0A2R8QI77_DANRE	Periaxin OS=Danio rerio OX=7955 GN=prx PE=4 SV=1			0	99	FHMPSVDISLPK				-0.00112295	1369.71	457.576	1369.71	457.576	3	16	1.1.1.3135.4	33.4699	817.06	750.36	33.52	0.7	3879.04
1	194.25	194.25	79.32	49.37	47.18	tr|A0A2R8QI77|A0A2R8QI77_DANRE	Periaxin OS=Danio rerio OX=7955 GN=prx PE=4 SV=1			0	99	FHMPSVDISLPK				-0.00112295	1369.71	457.576	1369.71	457.576	3	16	1.1.1.3137.3	33.5842	817.06	806.23	33.52	0.7	4027.01
1	194.25	194.25	79.32	49.37	47.18	tr|A0A2R8QI77|A0A2R8QI77_DANRE	Periaxin OS=Danio rerio OX=7955 GN=prx PE=4 SV=1			0	99	FHMPSVDISLPK				-0.00112295	1369.71	457.576	1369.71	457.576	3	15	1.1.1.3139.3	33.7	817.06	746.57	33.52	0.7	3193.88
1	194.25	194.25	79.32	49.37	47.18	tr|A0A2R8QI77|A0A2R8QI77_DANRE	Periaxin OS=Danio rerio OX=7955 GN=prx PE=4 SV=1			0	99	FHMPSVDISLPK				-0.00112295	1369.71	457.576	1369.71	457.576	3	15	1.1.1.3141.3	33.816	817.06	586.03	33.52	0.7	3601.89
1	194.25	194.25	79.32	49.37	47.18	tr|A0A2R8QI77|A0A2R8QI77_DANRE	Periaxin OS=Danio rerio OX=7955 GN=prx PE=4 SV=1			0	99	FHMPSVDISLPK				-0.00112295	1369.71	457.576	1369.71	457.576	3	14	1.1.1.3143.4	33.9333	817.06	475.54	33.52	0.7	2657.68
1	194.25	194.25	79.32	49.37	47.18	tr|A0A2R8QI77|A0A2R8QI77_DANRE	Periaxin OS=Danio rerio OX=7955 GN=prx PE=4 SV=1			0	99	FHMPSVDISLPK				-0.00112295	1369.71	457.576	1369.71	457.576	3	13	1.1.1.3145.3	34.0473	817.06	407.27	33.52	0.7	2395.94
1	194.25	194.25	79.32	49.37	47.18	tr|A0A2R8QI77|A0A2R8QI77_DANRE	Periaxin OS=Danio rerio OX=7955 GN=prx PE=4 SV=1			0	99	FHMPSVDISLPK				-0.00112295	1369.71	457.576	1369.71	457.576	3	15	1.1.1.3147.3	34.163	817.06	373.53	33.52	0.7	2083.11
1	194.25	194.25	79.32	49.37	47.18	tr|A0A2R8QI77|A0A2R8QI77_DANRE	Periaxin OS=Danio rerio OX=7955 GN=prx PE=4 SV=1			0	99	FHMPSVDISLPK				-0.00112295	1369.71	457.576	1369.71	457.576	3	14	1.1.1.3149.3	34.2786	817.06	329.56	33.52	0.7	1709.18
1	194.25	194.25	79.32	49.37	47.18	tr|A0A2R8QI77|A0A2R8QI77_DANRE	Periaxin OS=Danio rerio OX=7955 GN=prx PE=4 SV=1			0	99	FHMPSVDISLPK				-0.00112295	1369.71	457.576	1369.71	457.576	3	12	1.1.1.3151.3	34.3946	817.06	291.65	33.52	0.7	1811.06
1	194.25	194.25	79.32	49.37	47.18	tr|A0A2R8QI77|A0A2R8QI77_DANRE	Periaxin OS=Danio rerio OX=7955 GN=prx PE=4 SV=1			0	99	FHMPSVDISLPK				-0.00112295	1369.71	457.576	1369.71	457.576	3	13	1.1.1.3154.2	34.5668	817.06	247.2	33.52	0.7	1678.49
1	194.25	194.25	79.32	49.37	47.18	tr|A0A2R8QI77|A0A2R8QI77_DANRE	Periaxin OS=Danio rerio OX=7955 GN=prx PE=4 SV=1			0	99	FHMPSVDISLPK				-0.00112295	1369.71	457.576	1369.71	457.576	3	13	1.1.1.3156.2	34.6826	817.06	228.77	33.52	0.7	1305.26
1	194.25	194.25	79.32	49.37	47.18	tr|A0A2R8QI77|A0A2R8QI77_DANRE	Periaxin OS=Danio rerio OX=7955 GN=prx PE=4 SV=1			0	99	FHMPSVDISLPK				-0.0137279	1369.69	685.854	1369.71	685.86	2	9	1.1.1.3133.15	33.3722	636.08	448.59	33.58	0.87	2519.11
1	194.25	194.25	79.32	49.37	47.18	tr|A0A2R8QI77|A0A2R8QI77_DANRE	Periaxin OS=Danio rerio OX=7955 GN=prx PE=4 SV=1			0	99	FHMPSVDISLPR	Oxidation(M)@3			0.00195688	1413.71	472.244	1413.71	472.243	3	14	1.1.1.3025.6	27.1079	1080.28	812.47	27.5	0.98	5115.32
1	194.25	194.25	79.32	49.37	47.18	tr|A0A2R8QI77|A0A2R8QI77_DANRE	Periaxin OS=Danio rerio OX=7955 GN=prx PE=4 SV=1			0	99	FHMPSVDISLPR	Oxidation(M)@3			0.00195688	1413.71	472.244	1413.71	472.243	3	13	1.1.1.3027.5	27.2219	1080.28	953.69	27.5	0.98	5228.66
1	194.25	194.25	79.32	49.37	47.18	tr|A0A2R8QI77|A0A2R8QI77_DANRE	Periaxin OS=Danio rerio OX=7955 GN=prx PE=4 SV=1			0	99	FHMPSVDISLPR	Oxidation(M)@3			0.00195688	1413.71	472.244	1413.71	472.243	3	14	1.1.1.3029.5	27.3374	1080.28	1030.6	27.5	0.98	5495.22
1	194.25	194.25	79.32	49.37	47.18	tr|A0A2R8QI77|A0A2R8QI77_DANRE	Periaxin OS=Danio rerio OX=7955 GN=prx PE=4 SV=1			0	99	FHMPSVDISLPR	Oxidation(M)@3			0.00195688	1413.71	472.244	1413.71	472.243	3	14	1.1.1.3031.5	27.4529	1080.28	1067.3	27.5	0.98	5604.48
1	194.25	194.25	79.32	49.37	47.18	tr|A0A2R8QI77|A0A2R8QI77_DANRE	Periaxin OS=Danio rerio OX=7955 GN=prx PE=4 SV=1			0	99	FHMPSVDISLPR	Oxidation(M)@3			0.00195688	1413.71	472.244	1413.71	472.243	3	14	1.1.1.3033.3	27.5649	1080.28	997.21	27.5	0.98	5655.49
1	194.25	194.25	79.32	49.37	47.18	tr|A0A2R8QI77|A0A2R8QI77_DANRE	Periaxin OS=Danio rerio OX=7955 GN=prx PE=4 SV=1			0	99	FHMPSVDISLPR	Oxidation(M)@3			0.00195688	1413.71	472.244	1413.71	472.243	3	14	1.1.1.3035.4	27.6822	1080.28	885.7	27.5	0.98	4473.42
1	194.25	194.25	79.32	49.37	47.18	tr|A0A2R8QI77|A0A2R8QI77_DANRE	Periaxin OS=Danio rerio OX=7955 GN=prx PE=4 SV=1			0	99	FHMPSVDISLPR	Oxidation(M)@3			0.00195688	1413.71	472.244	1413.71	472.243	3	14	1.1.1.3037.5	27.7996	1080.28	721.91	27.5	0.98	4139.58
1	194.25	194.25	79.32	49.37	47.18	tr|A0A2R8QI77|A0A2R8QI77_DANRE	Periaxin OS=Danio rerio OX=7955 GN=prx PE=4 SV=1			0	99	FHMPSVDISLPR	Oxidation(M)@3			0.00195688	1413.71	472.244	1413.71	472.243	3	14	1.1.1.3039.5	27.9152	1080.28	576.3	27.5	0.98	3772.26
1	194.25	194.25	79.32	49.37	47.18	tr|A0A2R8QI77|A0A2R8QI77_DANRE	Periaxin OS=Danio rerio OX=7955 GN=prx PE=4 SV=1			0	99	FHMPSVDISLPR	Oxidation(M)@3			0.00195688	1413.71	472.244	1413.71	472.243	3	15	1.1.1.3041.5	28.0307	1080.28	484.37	27.5	0.98	3049.3
1	194.25	194.25	79.32	49.37	47.18	tr|A0A2R8QI77|A0A2R8QI77_DANRE	Periaxin OS=Danio rerio OX=7955 GN=prx PE=4 SV=1			0	99	FHMPSVDISLPR	Oxidation(M)@3			0.00195688	1413.71	472.244	1413.71	472.243	3	13	1.1.1.3043.5	28.1462	1080.28	449.99	27.5	0.98	2717.67
1	194.25	194.25	79.32	49.37	47.18	tr|A0A2R8QI77|A0A2R8QI77_DANRE	Periaxin OS=Danio rerio OX=7955 GN=prx PE=4 SV=1			0	99	FHMPSVDISLPR	Oxidation(M)@3			0.00195688	1413.71	472.244	1413.71	472.243	3	15	1.1.1.3045.6	28.2635	1080.28	417.91	27.5	0.98	2866.86
1	194.25	194.25	79.32	49.37	47.18	tr|A0A2R8QI77|A0A2R8QI77_DANRE	Periaxin OS=Danio rerio OX=7955 GN=prx PE=4 SV=1			0	99	FHMPSVDISLPR	Oxidation(M)@3			0.00195688	1413.71	472.244	1413.71	472.243	3	12	1.1.1.3049.5	28.493	1080.28	349	27.5	0.98	2703.26
1	194.25	194.25	79.32	49.37	47.18	tr|A0A2R8QI77|A0A2R8QI77_DANRE	Periaxin OS=Danio rerio OX=7955 GN=prx PE=4 SV=1			0	99	FHMPSVDISLPR	Oxidation(M)@3			-0.0157129	1413.69	472.238	1413.71	472.243	3	12	1.1.1.3051.6	28.6104	293.75	292.5	28.83	0.81	2559.82
1	194.25	194.25	79.32	49.37	47.18	tr|A0A2R8QI77|A0A2R8QI77_DANRE	Periaxin OS=Danio rerio OX=7955 GN=prx PE=4 SV=1			0	99	FHMPSVDISLPR	Oxidation(M)@3			-0.0157129	1413.69	472.238	1413.71	472.243	3	13	1.1.1.3054.6	28.7837	293.75	290.62	28.83	0.81	2276.36
1	194.25	194.25	79.32	49.37	47.18	tr|A0A2R8QI77|A0A2R8QI77_DANRE	Periaxin OS=Danio rerio OX=7955 GN=prx PE=4 SV=1			0	99	FHMPSVDISLPR	Oxidation(M)@3			-0.0157129	1413.69	472.238	1413.71	472.243	3	12	1.1.1.3056.4	28.896	293.75	281.59	28.83	0.81	2395.14
1	194.25	194.25	79.32	49.37	47.18	tr|A0A2R8QI77|A0A2R8QI77_DANRE	Periaxin OS=Danio rerio OX=7955 GN=prx PE=4 SV=1			0	99	FHMPSVDISLPR	Oxidation(M)@3			-0.0157129	1413.69	472.238	1413.71	472.243	3	12	1.1.1.3059.6	29.0723	293.75	254.01	28.83	0.81	1816.86
1	194.25	194.25	79.32	49.37	47.18	tr|A0A2R8QI77|A0A2R8QI77_DANRE	Periaxin OS=Danio rerio OX=7955 GN=prx PE=4 SV=1			0	99	FHMPSVDISLPR	Oxidation(M)@3			0.00195688	1413.71	472.244	1413.71	472.243	3	13	1.1.1.3063.4	29.3001	1080.28	176.21	27.5	0.98	2111.2
1	194.25	194.25	79.32	49.37	47.18	tr|A0A2R8QI77|A0A2R8QI77_DANRE	Periaxin OS=Danio rerio OX=7955 GN=prx PE=4 SV=1			0	99	FHMPSVDISLPR	Oxidation(M)@3			0.00195688	1413.71	472.244	1413.71	472.243	3	12	1.1.1.3065.4	29.4158	1080.28	184.9	27.5	0.98	2253.88
1	194.25	194.25	79.32	49.37	47.18	tr|A0A2R8QI77|A0A2R8QI77_DANRE	Periaxin OS=Danio rerio OX=7955 GN=prx PE=4 SV=1			0	99	FHMPSVDISLPR	Oxidation(M)@3			-0.00738153	1413.7	472.241	1413.71	472.243	3	11	1.1.1.3092.3	30.9767	133.5	129.26	31.03	0.69	1446.73
1	194.25	194.25	79.32	49.37	47.18	tr|A0A2R8QI77|A0A2R8QI77_DANRE	Periaxin OS=Danio rerio OX=7955 GN=prx PE=4 SV=1			0	99	FHMPSVDISLPR				-9.91624e-05	1397.71	466.911	1397.71	466.911	3	12	1.1.1.3137.4	33.5858	1065.12	404.69	33.98	0.75	2208.08
1	194.25	194.25	79.32	49.37	47.18	tr|A0A2R8QI77|A0A2R8QI77_DANRE	Periaxin OS=Danio rerio OX=7955 GN=prx PE=4 SV=1			0	99	FHMPSVDISLPR				-9.91624e-05	1397.71	466.911	1397.71	466.911	3	13	1.1.1.3139.4	33.7017	1065.12	629.89	33.98	0.75	3123.89
1	194.25	194.25	79.32	49.37	47.18	tr|A0A2R8QI77|A0A2R8QI77_DANRE	Periaxin OS=Danio rerio OX=7955 GN=prx PE=4 SV=1			0	99	FHMPSVDISLPR				-9.91624e-05	1397.71	466.911	1397.71	466.911	3	14	1.1.1.3141.5	33.8193	1065.12	888.68	33.98	0.75	4676.17
1	194.25	194.25	79.32	49.37	47.18	tr|A0A2R8QI77|A0A2R8QI77_DANRE	Periaxin OS=Danio rerio OX=7955 GN=prx PE=4 SV=1			0	99	FHMPSVDISLPR				-9.91624e-05	1397.71	466.911	1397.71	466.911	3	16	1.1.1.3143.5	33.935	1065.12	1031.09	33.98	0.75	4568.91
1	194.25	194.25	79.32	49.37	47.18	tr|A0A2R8QI77|A0A2R8QI77_DANRE	Periaxin OS=Danio rerio OX=7955 GN=prx PE=4 SV=1			0	99	FHMPSVDISLPR				-9.91624e-05	1397.71	466.911	1397.71	466.911	3	13	1.1.1.3145.4	34.049	1065.12	1051.89	33.98	0.75	5472.91
1	194.25	194.25	79.32	49.37	47.18	tr|A0A2R8QI77|A0A2R8QI77_DANRE	Periaxin OS=Danio rerio OX=7955 GN=prx PE=4 SV=1			0	99	FHMPSVDISLPR				-9.91624e-05	1397.71	466.911	1397.71	466.911	3	15	1.1.1.3147.4	34.1646	1065.12	991.71	33.98	0.75	4739.36
1	194.25	194.25	79.32	49.37	47.18	tr|A0A2R8QI77|A0A2R8QI77_DANRE	Periaxin OS=Danio rerio OX=7955 GN=prx PE=4 SV=1			0	99	FHMPSVDISLPR				-9.91624e-05	1397.71	466.911	1397.71	466.911	3	13	1.1.1.3149.4	34.2803	1065.12	816.59	33.98	0.75	4373.74
1	194.25	194.25	79.32	49.37	47.18	tr|A0A2R8QI77|A0A2R8QI77_DANRE	Periaxin OS=Danio rerio OX=7955 GN=prx PE=4 SV=1			0	99	FHMPSVDISLPR				-9.91624e-05	1397.71	466.911	1397.71	466.911	3	13	1.1.1.3151.4	34.3963	1065.12	647.05	33.98	0.75	3521.21
1	194.25	194.25	79.32	49.37	47.18	tr|A0A2R8QI77|A0A2R8QI77_DANRE	Periaxin OS=Danio rerio OX=7955 GN=prx PE=4 SV=1			0	99	FHMPSVDISLPR				-9.91624e-05	1397.71	466.911	1397.71	466.911	3	14	1.1.1.3153.4	34.5121	1065.12	562.47	33.98	0.75	2478.62
1	194.25	194.25	79.32	49.37	47.18	tr|A0A2R8QI77|A0A2R8QI77_DANRE	Periaxin OS=Danio rerio OX=7955 GN=prx PE=4 SV=1			0	99	FHMPSVDISLPR				-9.91624e-05	1397.71	466.911	1397.71	466.911	3	13	1.1.1.3155.3	34.6263	1065.12	481.58	33.98	0.75	2324.75
1	194.25	194.25	79.32	49.37	47.18	tr|A0A2R8QI77|A0A2R8QI77_DANRE	Periaxin OS=Danio rerio OX=7955 GN=prx PE=4 SV=1			0	99	FHMPSVDISLPR				-0.00684853	1397.71	466.909	1397.71	466.911	3	11	1.1.1.3182.2	36.1862	257.25	231.36	36.12	0.64	1092
1	194.25	194.25	79.32	49.37	47.18	tr|A0A2R8QI77|A0A2R8QI77_DANRE	Periaxin OS=Danio rerio OX=7955 GN=prx PE=4 SV=1			0	99	FHMPSVDISLPR	Oxidation(M)@3			-0.00408467	1413.7	472.242	1413.71	472.243	3	12	2.1.1.3051.11	27.4875	169.41	166.96	27.47	1.21	2610.14
1	194.25	194.25	79.32	49.37	47.18	tr|A0A2R8QI77|A0A2R8QI77_DANRE	Periaxin OS=Danio rerio OX=7955 GN=prx PE=4 SV=1			0	99	FHMPSVDISLPR	Oxidation(M)@3			-0.00408467	1413.7	472.242	1413.71	472.243	3	10	2.1.1.3046.7	27.1924	169.41	142.58	27.47	1.21	2529.61
1	194.25	194.25	79.32	49.37	47.18	tr|A0A2R8QI77|A0A2R8QI77_DANRE	Periaxin OS=Danio rerio OX=7955 GN=prx PE=4 SV=1			0	99	FHMPSVDISLPR	Oxidation(M)@3			-0.00408467	1413.7	472.242	1413.71	472.243	3	9	2.1.1.3060.11	28.0067	169.41	110.89	27.47	1.21	2045.31
1	194.25	194.25	79.32	49.37	47.18	tr|A0A2R8QI77|A0A2R8QI77_DANRE	Periaxin OS=Danio rerio OX=7955 GN=prx PE=4 SV=1			0	63.29	FHMPSVDISLPR	Oxidation(M)@3			0.0103798	1413.72	472.247	1413.71	472.243	3	6	1.1.1.3109.2	31.9598	120.63	118.97	31.95	0.29	1232.58
1	194.25	194.25	79.32	49.37	47.18	tr|A0A2R8QI77|A0A2R8QI77_DANRE	Periaxin OS=Danio rerio OX=7955 GN=prx PE=4 SV=1			0	44.27	FHMPSVDISLPR	Oxidation(M)@3			-0.00738153	1413.7	472.241	1413.71	472.243	3	7	1.1.1.3091.6	30.9239	133.5	126.55	31.03	0.69	2330.55
1	194.25	194.25	79.32	49.37	47.18	tr|A0A2R8QI77|A0A2R8QI77_DANRE	Periaxin OS=Danio rerio OX=7955 GN=prx PE=4 SV=1			0	99	FHMPSVDISPSK	Oxidation(M)@3			0.000105332	1359.65	454.224	1359.65	454.224	3	12	1.1.1.2901.10	19.9591	312.03	310.25	20	1.09	2919.64
1	194.25	194.25	79.32	49.37	47.18	tr|A0A2R8QI77|A0A2R8QI77_DANRE	Periaxin OS=Danio rerio OX=7955 GN=prx PE=4 SV=1			0	99	FHMPSVDISPSK	Oxidation(M)@3			0.000105332	1359.65	454.224	1359.65	454.224	3	12	1.1.1.2903.11	20.0758	312.03	287.12	20	1.09	2358.25
1	194.25	194.25	79.32	49.37	47.18	tr|A0A2R8QI77|A0A2R8QI77_DANRE	Periaxin OS=Danio rerio OX=7955 GN=prx PE=4 SV=1			0	99	FHMPSVDISPSK				-0.000175611	1343.65	448.892	1343.65	448.892	3	13	1.1.1.3011.9	26.3042	175.39	171.32	26.46	0.81	1933.53
1	194.25	194.25	79.32	49.37	47.18	tr|A0A2R8QI77|A0A2R8QI77_DANRE	Periaxin OS=Danio rerio OX=7955 GN=prx PE=4 SV=1			0	98.75	FHMPSVDISPSK	Oxidation(M)@3			0.000105332	1359.65	454.224	1359.65	454.224	3	10	1.1.1.2905.10	20.1887	312.03	235.92	20	1.09	3377.07
1	194.25	194.25	79.32	49.37	47.18	tr|A0A2R8QI77|A0A2R8QI77_DANRE	Periaxin OS=Danio rerio OX=7955 GN=prx PE=4 SV=1			0	98.45	FHMPSVDISPSK	Oxidation(M)@3			0.000746202	1359.65	454.224	1359.65	454.224	3	10	1.1.1.2910.11	20.4771	312.03	174.51	19.94	1.32	3033.32
1	194.25	194.25	79.32	49.37	47.18	tr|A0A2R8QI77|A0A2R8QI77_DANRE	Periaxin OS=Danio rerio OX=7955 GN=prx PE=4 SV=1			0	32.35	FHMPSVDISPSK	Oxidation(M)@3			0.000105332	1359.65	454.224	1359.65	454.224	3	8	1.1.1.2912.9	20.5889	312.03	155.33	20	1.09	2899.04
1	194.25	194.25	79.32	49.37	47.18	tr|A0A2R8QI77|A0A2R8QI77_DANRE	Periaxin OS=Danio rerio OX=7955 GN=prx PE=4 SV=1			0	99	FHMPSVDISQPGGGAK				0.0035462	1626.79	543.269	1626.78	543.268	3	10	1.1.1.3026.15	27.1808	430.31	422.55	27.15	0.81	2445.24
1	194.25	194.25	79.32	49.37	47.18	tr|A0A2R8QI77|A0A2R8QI77_DANRE	Periaxin OS=Danio rerio OX=7955 GN=prx PE=4 SV=1			0	99	FHMPSVDISQPGGGAK				0.0035462	1626.79	543.269	1626.78	543.268	3	9	1.1.1.3028.14	27.2946	430.31	350.21	27.15	0.81	2142.14
1	194.25	194.25	79.32	49.37	47.18	tr|A0A2R8QI77|A0A2R8QI77_DANRE	Periaxin OS=Danio rerio OX=7955 GN=prx PE=4 SV=1			0	95.05	FHMPSVDISQPGGGAK				0.0035462	1626.79	543.269	1626.78	543.268	3	9	1.1.1.3034.15	27.6427	430.31	207.06	27.15	0.81	2102.5
1	194.25	194.25	79.32	49.37	47.18	tr|A0A2R8QI77|A0A2R8QI77_DANRE	Periaxin OS=Danio rerio OX=7955 GN=prx PE=4 SV=1			0	84.1	FHMPSVDISQPGGGAK				0.0035462	1626.79	543.269	1626.78	543.268	3	8	1.1.1.3041.12	28.0424	430.31	158.14	27.15	0.81	1726.81
1	194.25	194.25	79.32	49.37	47.18	tr|A0A2R8QI77|A0A2R8QI77_DANRE	Periaxin OS=Danio rerio OX=7955 GN=prx PE=4 SV=1			0	99	FKPSGADVNLEGPDIK				0.000710438	1685.86	562.962	1685.86	562.961	3	12	1.1.1.2957.17	23.1999	1350.44	385.8	23.46	0.75	1915.65
1	194.25	194.25	79.32	49.37	47.18	tr|A0A2R8QI77|A0A2R8QI77_DANRE	Periaxin OS=Danio rerio OX=7955 GN=prx PE=4 SV=1			0	99	FKPSGADVNLEGPDIK				0.000710438	1685.86	562.962	1685.86	562.961	3	19	1.1.1.2961.14	23.4255	1350.44	1244.02	23.46	0.75	4944.56
1	194.25	194.25	79.32	49.37	47.18	tr|A0A2R8QI77|A0A2R8QI77_DANRE	Periaxin OS=Danio rerio OX=7955 GN=prx PE=4 SV=1			0	99	FKPSGADVNLEGPDIK				0.000710438	1685.86	562.962	1685.86	562.961	3	18	1.1.1.2963.19	23.5494	1350.44	1258.6	23.46	0.75	4566.6
1	194.25	194.25	79.32	49.37	47.18	tr|A0A2R8QI77|A0A2R8QI77_DANRE	Periaxin OS=Danio rerio OX=7955 GN=prx PE=4 SV=1			0	99	FKPSGADVNLEGPDIK				0.000710438	1685.86	562.962	1685.86	562.961	3	18	1.1.1.2965.22	23.6697	1350.44	987.29	23.46	0.75	3675.08
1	194.25	194.25	79.32	49.37	47.18	tr|A0A2R8QI77|A0A2R8QI77_DANRE	Periaxin OS=Danio rerio OX=7955 GN=prx PE=4 SV=1			0	99	FKPSGADVNLEGPDIK				0.000710438	1685.86	562.962	1685.86	562.961	3	16	1.1.1.2967.18	23.7783	1350.44	802.73	23.46	0.75	3423.23
1	194.25	194.25	79.32	49.37	47.18	tr|A0A2R8QI77|A0A2R8QI77_DANRE	Periaxin OS=Danio rerio OX=7955 GN=prx PE=4 SV=1			0	99	FKPSGADVNLEGPDIK				0.000710438	1685.86	562.962	1685.86	562.961	3	12	1.1.1.2969.21	23.899	1350.44	654.62	23.46	0.75	3466.62
1	194.25	194.25	79.32	49.37	47.18	tr|A0A2R8QI77|A0A2R8QI77_DANRE	Periaxin OS=Danio rerio OX=7955 GN=prx PE=4 SV=1			0	99	FKPSGADVNLEGPDIK				0.000710438	1685.86	562.962	1685.86	562.961	3	13	1.1.1.2972.19	24.0693	1350.44	509.96	23.46	0.75	2710.18
1	194.25	194.25	79.32	49.37	47.18	tr|A0A2R8QI77|A0A2R8QI77_DANRE	Periaxin OS=Danio rerio OX=7955 GN=prx PE=4 SV=1			0	99	FKPSGADVNLEGPDIK				0.000710438	1685.86	562.962	1685.86	562.961	3	12	1.1.1.2974.22	24.1897	1350.44	435.17	23.46	0.75	2716.47
1	194.25	194.25	79.32	49.37	47.18	tr|A0A2R8QI77|A0A2R8QI77_DANRE	Periaxin OS=Danio rerio OX=7955 GN=prx PE=4 SV=1			0	99	FKPSGADVNLEGPDIK				0.000710438	1685.86	562.962	1685.86	562.961	3	11	1.1.1.2977.20	24.3596	1350.44	370.17	23.46	0.75	2340.22
1	194.25	194.25	79.32	49.37	47.18	tr|A0A2R8QI77|A0A2R8QI77_DANRE	Periaxin OS=Danio rerio OX=7955 GN=prx PE=4 SV=1			0	99	FKPSGADVNLEGPDIK				-0.00643067	1685.86	562.959	1685.86	562.961	3	10	1.1.1.2983.20	24.7063	373.8	354.56	24.73	0.69	2242.37
1	194.25	194.25	79.32	49.37	47.18	tr|A0A2R8QI77|A0A2R8QI77_DANRE	Periaxin OS=Danio rerio OX=7955 GN=prx PE=4 SV=1			0	99	FKPSGADVNLEGPDIK				-0.00643067	1685.86	562.959	1685.86	562.961	3	9	1.1.1.2990.19	25.1089	373.8	311.69	24.73	0.69	1916.04
1	194.25	194.25	79.32	49.37	47.18	tr|A0A2R8QI77|A0A2R8QI77_DANRE	Periaxin OS=Danio rerio OX=7955 GN=prx PE=4 SV=1			0	98.16	FKPSGADVNLEGPDIK				0.000710438	1685.86	562.962	1685.86	562.961	3	12	1.1.1.2967.19	23.78	1350.44	799.54	23.46	0.75	2920.04
1	194.25	194.25	79.32	49.37	47.18	tr|A0A2R8QI77|A0A2R8QI77_DANRE	Periaxin OS=Danio rerio OX=7955 GN=prx PE=4 SV=1			0	97.96	FKPSGADVNLEGPDIK	Deamidated(N)@9			0.0102247	1686.86	563.293	1686.85	563.289	3	9	1.1.1.2993.19	25.2819	215.51	141.69	24.61	1.39	1885.24
1	194.25	194.25	79.32	49.37	47.18	tr|A0A2R8QI77|A0A2R8QI77_DANRE	Periaxin OS=Danio rerio OX=7955 GN=prx PE=4 SV=1			0	57.56	FKPSGADVNLEGPDIK				-0.00588136	1685.86	562.96	1685.86	562.961	3	7	1.1.1.3001.18	25.7417	228.76	227.81	25.77	1.5	1547.12
1	194.25	194.25	79.32	49.37	47.18	tr|A0A2R8QI77|A0A2R8QI77_DANRE	Periaxin OS=Danio rerio OX=7955 GN=prx PE=4 SV=1			0	49.35	FKPSGADVNLEGPDIK	Deamidated(N)@9			0.0126051	1686.86	563.294	1686.85	563.289	3	7	1.1.1.2998.22	25.5754	210.18	151.28	25.02	0.87	1624.4
1	194.25	194.25	79.32	49.37	47.18	tr|A0A2R8QI77|A0A2R8QI77_DANRE	Periaxin OS=Danio rerio OX=7955 GN=prx PE=4 SV=1			0	39.34	FKPSGADVNLEGPDIK				0.000710438	1685.86	562.962	1685.86	562.961	3	7	1.1.1.2975.22	24.2475	1350.44	420.37	23.46	0.75	2232.21
1	194.25	194.25	79.32	49.37	47.18	tr|A0A2R8QI77|A0A2R8QI77_DANRE	Periaxin OS=Danio rerio OX=7955 GN=prx PE=4 SV=1			0	17.74	FKPSGADVNLEGPDIK				-0.00643067	1685.86	562.959	1685.86	562.961	3	6	1.1.1.2987.16	24.9306	373.8	343.03	24.73	0.69	1807.95
1	194.25	194.25	79.32	49.37	47.18	tr|A0A2R8QI77|A0A2R8QI77_DANRE	Periaxin OS=Danio rerio OX=7955 GN=prx PE=4 SV=1			0	99	FKPSGADVNVEGPDIK				0.000558622	1671.85	558.29	1671.85	558.29	3	20	1.1.1.2924.24	21.307	3679.34	1626.84	21.5	0.52	7977.89
1	194.25	194.25	79.32	49.37	47.18	tr|A0A2R8QI77|A0A2R8QI77_DANRE	Periaxin OS=Danio rerio OX=7955 GN=prx PE=4 SV=1			0	99	FKPSGADVNVEGPDIK				0.000558622	1671.85	558.29	1671.85	558.29	3	15	1.1.1.2925.18	21.3548	3679.34	2290.83	21.5	0.52	7384.02
1	194.25	194.25	79.32	49.37	47.18	tr|A0A2R8QI77|A0A2R8QI77_DANRE	Periaxin OS=Danio rerio OX=7955 GN=prx PE=4 SV=1			0	99	FKPSGADVNVEGPDIK				5.46777e-05	1671.85	836.931	1671.85	836.931	2	19	1.1.1.2926.30	21.4325	850.42	737.7	21.5	0.52	2345.05
1	194.25	194.25	79.32	49.37	47.18	tr|A0A2R8QI77|A0A2R8QI77_DANRE	Periaxin OS=Danio rerio OX=7955 GN=prx PE=4 SV=1			0	99	FKPSGADVNVEGPDIK				0.000558622	1671.85	558.29	1671.85	558.29	3	22	1.1.1.2928.23	21.5362	3679.34	3664.54	21.5	0.52	15039.7
1	194.25	194.25	79.32	49.37	47.18	tr|A0A2R8QI77|A0A2R8QI77_DANRE	Periaxin OS=Danio rerio OX=7955 GN=prx PE=4 SV=1			0	99	FKPSGADVNVEGPDIK				0.000558622	1671.85	558.29	1671.85	558.29	3	20	1.1.1.2930.22	21.6502	3679.34	3002.52	21.5	0.52	12273.5
1	194.25	194.25	79.32	49.37	47.18	tr|A0A2R8QI77|A0A2R8QI77_DANRE	Periaxin OS=Danio rerio OX=7955 GN=prx PE=4 SV=1			0	99	FKPSGADVNVEGPDIK				0.000558622	1671.85	558.29	1671.85	558.29	3	20	1.1.1.2932.26	21.7721	3679.34	2124.55	21.5	0.52	8507.19
1	194.25	194.25	79.32	49.37	47.18	tr|A0A2R8QI77|A0A2R8QI77_DANRE	Periaxin OS=Danio rerio OX=7955 GN=prx PE=4 SV=1			0	99	FKPSGADVNVEGPDIK				0.000558622	1671.85	558.29	1671.85	558.29	3	20	1.1.1.2934.23	21.8828	3679.34	1584.21	21.5	0.52	7494.81
1	194.25	194.25	79.32	49.37	47.18	tr|A0A2R8QI77|A0A2R8QI77_DANRE	Periaxin OS=Danio rerio OX=7955 GN=prx PE=4 SV=1			0	99	FKPSGADVNVEGPDIK				0.000558622	1671.85	558.29	1671.85	558.29	3	19	1.1.1.2936.21	21.9948	3679.34	1249.38	21.5	0.52	5994.03
1	194.25	194.25	79.32	49.37	47.18	tr|A0A2R8QI77|A0A2R8QI77_DANRE	Periaxin OS=Danio rerio OX=7955 GN=prx PE=4 SV=1			0	99	FKPSGADVNVEGPDIK				0.000558622	1671.85	558.29	1671.85	558.29	3	17	1.1.1.2939.19	22.1648	3679.34	994.99	21.5	0.52	5295.85
1	194.25	194.25	79.32	49.37	47.18	tr|A0A2R8QI77|A0A2R8QI77_DANRE	Periaxin OS=Danio rerio OX=7955 GN=prx PE=4 SV=1			0	99	FKPSGADVNVEGPDIK				0.000558622	1671.85	558.29	1671.85	558.29	3	17	1.1.1.2941.16	22.2751	3679.34	882.5	21.5	0.52	4915.12
1	194.25	194.25	79.32	49.37	47.18	tr|A0A2R8QI77|A0A2R8QI77_DANRE	Periaxin OS=Danio rerio OX=7955 GN=prx PE=4 SV=1			0	99	FKPSGADVNVEGPDIK				0.000558622	1671.85	558.29	1671.85	558.29	3	14	1.1.1.2945.19	22.5109	3679.34	663.17	21.5	0.52	3903.34
1	194.25	194.25	79.32	49.37	47.18	tr|A0A2R8QI77|A0A2R8QI77_DANRE	Periaxin OS=Danio rerio OX=7955 GN=prx PE=4 SV=1			0	99	FKPSGADVNVEGPDIK				0.000558622	1671.85	558.29	1671.85	558.29	3	15	1.1.1.2947.19	22.6262	3679.34	663.91	21.5	0.52	3714.47
1	194.25	194.25	79.32	49.37	47.18	tr|A0A2R8QI77|A0A2R8QI77_DANRE	Periaxin OS=Danio rerio OX=7955 GN=prx PE=4 SV=1			0	99	FKPSGADVNVEGPDIK				0.000558622	1671.85	558.29	1671.85	558.29	3	13	1.1.1.2949.19	22.7417	3679.34	580.72	21.5	0.52	3291.16
1	194.25	194.25	79.32	49.37	47.18	tr|A0A2R8QI77|A0A2R8QI77_DANRE	Periaxin OS=Danio rerio OX=7955 GN=prx PE=4 SV=1			0	99	FKPSGADVNVEGPDIK				0.000558622	1671.85	558.29	1671.85	558.29	3	17	1.1.1.2951.19	22.8571	3679.34	543.72	21.5	0.52	3064.1
1	194.25	194.25	79.32	49.37	47.18	tr|A0A2R8QI77|A0A2R8QI77_DANRE	Periaxin OS=Danio rerio OX=7955 GN=prx PE=4 SV=1			0	99	FKPSGADVNVEGPDIK				0.000558622	1671.85	558.29	1671.85	558.29	3	12	1.1.1.2953.19	22.9724	3679.34	505.69	21.5	0.52	3313.26
1	194.25	194.25	79.32	49.37	47.18	tr|A0A2R8QI77|A0A2R8QI77_DANRE	Periaxin OS=Danio rerio OX=7955 GN=prx PE=4 SV=1			0	99	FKPSGADVNVEGPDIK				0.000558622	1671.85	558.29	1671.85	558.29	3	13	1.1.1.2954.20	23.0317	3679.34	509.04	21.5	0.52	2378.94
1	194.25	194.25	79.32	49.37	47.18	tr|A0A2R8QI77|A0A2R8QI77_DANRE	Periaxin OS=Danio rerio OX=7955 GN=prx PE=4 SV=1			0	99	FKPSGADVNVEGPDIK				0.000558622	1671.85	558.29	1671.85	558.29	3	13	1.1.1.2955.19	23.0877	3679.34	509.44	21.5	0.52	2877.38
1	194.25	194.25	79.32	49.37	47.18	tr|A0A2R8QI77|A0A2R8QI77_DANRE	Periaxin OS=Danio rerio OX=7955 GN=prx PE=4 SV=1			0	99	FKPSGADVNVEGPDIK				0.000558622	1671.85	558.29	1671.85	558.29	3	12	1.1.1.2957.15	23.1965	3679.34	455.7	21.5	0.52	3028.41
1	194.25	194.25	79.32	49.37	47.18	tr|A0A2R8QI77|A0A2R8QI77_DANRE	Periaxin OS=Danio rerio OX=7955 GN=prx PE=4 SV=1			0	99	FKPSGADVNVEGPDIK				0.000558622	1671.85	558.29	1671.85	558.29	3	15	1.1.1.2959.18	23.3169	3679.34	403.15	21.5	0.52	3135.99
1	194.25	194.25	79.32	49.37	47.18	tr|A0A2R8QI77|A0A2R8QI77_DANRE	Periaxin OS=Danio rerio OX=7955 GN=prx PE=4 SV=1			0	99	FKPSGADVNVEGPDIK				0.000558622	1671.85	558.29	1671.85	558.29	3	13	1.1.1.2961.12	23.4222	3679.34	373.45	21.5	0.52	2809.85
1	194.25	194.25	79.32	49.37	47.18	tr|A0A2R8QI77|A0A2R8QI77_DANRE	Periaxin OS=Danio rerio OX=7955 GN=prx PE=4 SV=1			0	99	FKPSGADVNVEGPDIK				0.000558622	1671.85	558.29	1671.85	558.29	3	13	1.1.1.2963.18	23.5477	3679.34	368.96	21.5	0.52	2911.58
1	194.25	194.25	79.32	49.37	47.18	tr|A0A2R8QI77|A0A2R8QI77_DANRE	Periaxin OS=Danio rerio OX=7955 GN=prx PE=4 SV=1			0	99	FKPSGADVNVEGPDIK				-0.00475143	1671.84	558.288	1671.85	558.29	3	11	1.1.1.2965.21	23.668	361.61	330.09	23.86	0.98	2523.51
1	194.25	194.25	79.32	49.37	47.18	tr|A0A2R8QI77|A0A2R8QI77_DANRE	Periaxin OS=Danio rerio OX=7955 GN=prx PE=4 SV=1			0	99	FKPSGADVNVEGPDIK				-0.00475143	1671.84	558.288	1671.85	558.29	3	14	1.1.1.2969.18	23.894	361.61	347.11	23.86	0.98	2611.2
1	194.25	194.25	79.32	49.37	47.18	tr|A0A2R8QI77|A0A2R8QI77_DANRE	Periaxin OS=Danio rerio OX=7955 GN=prx PE=4 SV=1			0	99	FKPSGADVNVEGPDIK				-0.00475143	1671.84	558.288	1671.85	558.29	3	13	1.1.1.2971.19	24.0115	361.61	294.92	23.86	0.98	2295.06
1	194.25	194.25	79.32	49.37	47.18	tr|A0A2R8QI77|A0A2R8QI77_DANRE	Periaxin OS=Danio rerio OX=7955 GN=prx PE=4 SV=1			0	99	FKPSGADVNVEGPDIK				-0.00475143	1671.84	558.288	1671.85	558.29	3	13	1.1.1.2975.21	24.2458	361.61	290.66	23.86	0.98	2492.12
1	194.25	194.25	79.32	49.37	47.18	tr|A0A2R8QI77|A0A2R8QI77_DANRE	Periaxin OS=Danio rerio OX=7955 GN=prx PE=4 SV=1			0	99	FKPSGADVNVEGPDIK				-0.00475143	1671.84	558.288	1671.85	558.29	3	13	1.1.1.2977.19	24.358	361.61	275.4	23.86	0.98	1992.82
1	194.25	194.25	79.32	49.37	47.18	tr|A0A2R8QI77|A0A2R8QI77_DANRE	Periaxin OS=Danio rerio OX=7955 GN=prx PE=4 SV=1			0	99	FKPSGADVNVEGPDIK				-0.00475143	1671.84	558.288	1671.85	558.29	3	12	1.1.1.2979.21	24.4768	361.61	250.93	23.86	0.98	2224.59
1	194.25	194.25	79.32	49.37	47.18	tr|A0A2R8QI77|A0A2R8QI77_DANRE	Periaxin OS=Danio rerio OX=7955 GN=prx PE=4 SV=1			0	99	FKPSGADVNVEGPDIK				-0.00475143	1671.84	558.288	1671.85	558.29	3	14	1.1.1.2981.22	24.5939	361.61	264.02	23.86	0.98	2053.45
1	194.25	194.25	79.32	49.37	47.18	tr|A0A2R8QI77|A0A2R8QI77_DANRE	Periaxin OS=Danio rerio OX=7955 GN=prx PE=4 SV=1			0	99	FKPSGADVNVEGPDIK				-0.0001738	1671.85	558.289	1671.85	558.29	3	13	1.1.1.2987.15	24.9289	274.06	252.47	24.67	1.21	2363.05
1	194.25	194.25	79.32	49.37	47.18	tr|A0A2R8QI77|A0A2R8QI77_DANRE	Periaxin OS=Danio rerio OX=7955 GN=prx PE=4 SV=1			0	99	FKPSGADVNVEGPDIK				0.00079088	1671.85	558.29	1671.85	558.29	3	14	2.1.1.2946.23	21.4504	488.02	336.71	21.59	0.58	4069.3
1	194.25	194.25	79.32	49.37	47.18	tr|A0A2R8QI77|A0A2R8QI77_DANRE	Periaxin OS=Danio rerio OX=7955 GN=prx PE=4 SV=1			0	99	FKPSGADVNVEGPDIK				0.00079088	1671.85	558.29	1671.85	558.29	3	15	2.1.1.2948.19	21.5593	488.02	466.22	21.59	0.58	4387.73
1	194.25	194.25	79.32	49.37	47.18	tr|A0A2R8QI77|A0A2R8QI77_DANRE	Periaxin OS=Danio rerio OX=7955 GN=prx PE=4 SV=1			0	99	FKPSGADVNVEGPDIK				0.00079088	1671.85	558.29	1671.85	558.29	3	16	2.1.1.2950.23	21.6814	488.02	431.04	21.59	0.58	3970.12
1	194.25	194.25	79.32	49.37	47.18	tr|A0A2R8QI77|A0A2R8QI77_DANRE	Periaxin OS=Danio rerio OX=7955 GN=prx PE=4 SV=1			0	99	FKPSGADVNVEGPDIK				0.00079088	1671.85	558.29	1671.85	558.29	3	13	2.1.1.2952.24	21.7982	488.02	297.64	21.59	0.58	3548.1
1	194.25	194.25	79.32	49.37	47.18	tr|A0A2R8QI77|A0A2R8QI77_DANRE	Periaxin OS=Danio rerio OX=7955 GN=prx PE=4 SV=1			0	99	FKPSGADVNVEGPDIK				-0.00530075	1671.84	558.288	1671.85	558.29	3	11	1.1.1.3010.16	26.2582	241.35	196.23	25.83	0.81	1603.1
1	194.25	194.25	79.32	49.37	47.18	tr|A0A2R8QI77|A0A2R8QI77_DANRE	Periaxin OS=Danio rerio OX=7955 GN=prx PE=4 SV=1			0	99	FKPSGADVNVEGPDIK				-0.00475143	1671.84	558.288	1671.85	558.29	3	12	1.1.1.2967.16	23.775	361.61	346.47	23.86	0.98	2899.84
1	194.25	194.25	79.32	49.37	47.18	tr|A0A2R8QI77|A0A2R8QI77_DANRE	Periaxin OS=Danio rerio OX=7955 GN=prx PE=4 SV=1			0	99	FKPSGADVNVEGPDIK				-0.00475143	1671.84	558.288	1671.85	558.29	3	11	1.1.1.2973.21	24.1303	361.61	285.6	23.86	0.98	2347.85
1	194.25	194.25	79.32	49.37	47.18	tr|A0A2R8QI77|A0A2R8QI77_DANRE	Periaxin OS=Danio rerio OX=7955 GN=prx PE=4 SV=1			0	99	FKPSGADVNVEGPDIK				0.000558622	1671.85	558.29	1671.85	558.29	3	11	1.1.1.2941.17	22.2768	3679.34	880.4	21.5	0.52	3342.66
1	194.25	194.25	79.32	49.37	47.18	tr|A0A2R8QI77|A0A2R8QI77_DANRE	Periaxin OS=Danio rerio OX=7955 GN=prx PE=4 SV=1			0	99	FKPSGADVNVEGPDIK				-0.0001738	1671.85	558.289	1671.85	558.29	3	10	1.1.1.2995.19	25.3974	274.06	195.56	24.67	1.21	2043.62
1	194.25	194.25	79.32	49.37	47.18	tr|A0A2R8QI77|A0A2R8QI77_DANRE	Periaxin OS=Danio rerio OX=7955 GN=prx PE=4 SV=1			0	99	FKPSGADVNVEGPDIK				0.00079088	1671.85	558.29	1671.85	558.29	3	12	2.1.1.2958.20	22.1381	488.02	192.55	21.59	0.58	3172.58
1	194.25	194.25	79.32	49.37	47.18	tr|A0A2R8QI77|A0A2R8QI77_DANRE	Periaxin OS=Danio rerio OX=7955 GN=prx PE=4 SV=1			0	99	FKPSGADVNVEGPDIK				-0.0001738	1671.85	558.289	1671.85	558.29	3	11	1.1.1.2983.19	24.7046	274.06	255.98	24.67	1.21	2138.09
1	194.25	194.25	79.32	49.37	47.18	tr|A0A2R8QI77|A0A2R8QI77_DANRE	Periaxin OS=Danio rerio OX=7955 GN=prx PE=4 SV=1			0	99	FKPSGADVNVEGPDIK				0.00275589	1671.85	558.29	1671.85	558.29	3	10	1.1.1.3015.13	26.542	241.35	163.23	25.94	1.1	1642.73
1	194.25	194.25	79.32	49.37	47.18	tr|A0A2R8QI77|A0A2R8QI77_DANRE	Periaxin OS=Danio rerio OX=7955 GN=prx PE=4 SV=1			0	99	FKPSGADVNVEGPDIK				0.00079088	1671.85	558.29	1671.85	558.29	3	11	2.1.1.2954.19	21.9054	488.02	270.64	21.59	0.58	3323.39
1	194.25	194.25	79.32	49.37	47.18	tr|A0A2R8QI77|A0A2R8QI77_DANRE	Periaxin OS=Danio rerio OX=7955 GN=prx PE=4 SV=1			0	99	FKPSGADVNVEGPDIK				-0.00530075	1671.84	558.288	1671.85	558.29	3	10	1.1.1.3005.18	25.9727	241.35	223.07	25.83	0.81	1647.3
1	194.25	194.25	79.32	49.37	47.18	tr|A0A2R8QI77|A0A2R8QI77_DANRE	Periaxin OS=Danio rerio OX=7955 GN=prx PE=4 SV=1			0	99	FKPSGADVNVEGPDIK				0.0031221	1671.85	558.291	1671.85	558.29	3	10	1.1.1.3018.20	26.727	185.7	165.73	26.69	0.92	1663.59
1	194.25	194.25	79.32	49.37	47.18	tr|A0A2R8QI77|A0A2R8QI77_DANRE	Periaxin OS=Danio rerio OX=7955 GN=prx PE=4 SV=1			0	99	FKPSGADVNVEGPDIK				0.000558622	1671.85	558.29	1671.85	558.29	3	10	1.1.1.2957.16	23.1982	3679.34	454.67	21.5	0.52	2183.98
1	194.25	194.25	79.32	49.37	47.18	tr|A0A2R8QI77|A0A2R8QI77_DANRE	Periaxin OS=Danio rerio OX=7955 GN=prx PE=4 SV=1			0	99	FKPSGADVNVEGPDIK				0.0031221	1671.85	558.291	1671.85	558.29	3	10	1.1.1.3021.12	26.8871	185.7	164.53	26.69	0.92	1610.9
1	194.25	194.25	79.32	49.37	47.18	tr|A0A2R8QI77|A0A2R8QI77_DANRE	Periaxin OS=Danio rerio OX=7955 GN=prx PE=4 SV=1			0	99	FKPSGADVNVEGPDIK				-0.0001738	1671.85	558.289	1671.85	558.29	3	10	1.1.1.2985.16	24.8151	274.06	250.52	24.67	1.21	2359.95
1	194.25	194.25	79.32	49.37	47.18	tr|A0A2R8QI77|A0A2R8QI77_DANRE	Periaxin OS=Danio rerio OX=7955 GN=prx PE=4 SV=1			0	99	FKPSGADVNVEGPDIK				-0.0001738	1671.85	558.289	1671.85	558.29	3	10	1.1.1.2989.18	25.0494	274.06	229.88	24.67	1.21	2263.57
1	194.25	194.25	79.32	49.37	47.18	tr|A0A2R8QI77|A0A2R8QI77_DANRE	Periaxin OS=Danio rerio OX=7955 GN=prx PE=4 SV=1			0	99	FKPSGADVNVEGPDIK				0.00079088	1671.85	558.29	1671.85	558.29	3	10	2.1.1.2951.23	21.7389	488.02	359.63	21.59	0.58	3104.44
1	194.25	194.25	79.32	49.37	47.18	tr|A0A2R8QI77|A0A2R8QI77_DANRE	Periaxin OS=Danio rerio OX=7955 GN=prx PE=4 SV=1			0	98.83	FKPSGADVNVEGPDIK				0.00079088	1671.85	558.29	1671.85	558.29	3	11	2.1.1.2960.21	22.2552	488.02	152.73	21.59	0.58	3329.66
1	194.25	194.25	79.32	49.37	47.18	tr|A0A2R8QI77|A0A2R8QI77_DANRE	Periaxin OS=Danio rerio OX=7955 GN=prx PE=4 SV=1			0	98.59	FKPSGADVNVEGPDIK				0.00120576	1671.85	558.29	1671.85	558.29	3	12	3.1.1.3014.23	21.3914	262.99	188.12	21.47	1.15	3742.06
1	194.25	194.25	79.32	49.37	47.18	tr|A0A2R8QI77|A0A2R8QI77_DANRE	Periaxin OS=Danio rerio OX=7955 GN=prx PE=4 SV=1			0	98.18	FKPSGADVNVEGPDIK				-0.00530075	1671.84	558.288	1671.85	558.29	3	8	1.1.1.3007.20	26.0913	241.35	199.32	25.83	0.81	1588.3
1	194.25	194.25	79.32	49.37	47.18	tr|A0A2R8QI77|A0A2R8QI77_DANRE	Periaxin OS=Danio rerio OX=7955 GN=prx PE=4 SV=1			0	96.31	FKPSGADVNVEGPDIK				0.00543683	1671.85	558.291	1671.85	558.29	3	8	1.1.1.3037.10	27.8079	166.89	138.62	27.97	0.92	1338.35
1	194.25	194.25	79.32	49.37	47.18	tr|A0A2R8QI77|A0A2R8QI77_DANRE	Periaxin OS=Danio rerio OX=7955 GN=prx PE=4 SV=1			0	94.77	FKPSGADVNVEGPDIK				0.00250713	1671.85	558.29	1671.85	558.29	3	8	1.1.1.3024.15	27.0653	185.7	142.63	26.69	0.92	1348.55
1	194.25	194.25	79.32	49.37	47.18	tr|A0A2R8QI77|A0A2R8QI77_DANRE	Periaxin OS=Danio rerio OX=7955 GN=prx PE=4 SV=1			0	94.12	FKPSGADVNVEGPDIK				-0.00530075	1671.84	558.288	1671.85	558.29	3	8	1.1.1.3002.18	25.7995	241.35	222.25	25.83	0.81	1706.58
1	194.25	194.25	79.32	49.37	47.18	tr|A0A2R8QI77|A0A2R8QI77_DANRE	Periaxin OS=Danio rerio OX=7955 GN=prx PE=4 SV=1			0	93.86	FKPSGADVNVEGPDIK				0.00079088	1671.85	558.29	1671.85	558.29	3	10	2.1.1.2956.23	22.0276	488.02	204.12	21.59	0.58	3254.17
1	194.25	194.25	79.32	49.37	47.18	tr|A0A2R8QI77|A0A2R8QI77_DANRE	Periaxin OS=Danio rerio OX=7955 GN=prx PE=4 SV=1			0	92.16	FKPSGADVNVEGPDIK				0.000558622	1671.85	558.29	1671.85	558.29	3	10	1.1.1.2924.25	21.3087	3679.34	1649.65	21.5	0.52	3242.87
1	194.25	194.25	79.32	49.37	47.18	tr|A0A2R8QI77|A0A2R8QI77_DANRE	Periaxin OS=Danio rerio OX=7955 GN=prx PE=4 SV=1			0	64.04	FKPSGADVNVEGPDIK				-0.00573265	1671.84	558.288	1671.85	558.29	3	7	1.1.1.3045.17	28.2819	157.02	149.64	28.31	0.35	1436.05
1	194.25	194.25	79.32	49.37	47.18	tr|A0A2R8QI77|A0A2R8QI77_DANRE	Periaxin OS=Danio rerio OX=7955 GN=prx PE=4 SV=1			0	24.63	FKPSGADVNVEGPDIK				0.000558622	1671.85	558.29	1671.85	558.29	3	8	1.1.1.2921.18	21.1237	3679.34	175.72	21.5	0.52	3670.69
1	194.25	194.25	79.32	49.37	47.18	tr|A0A2R8QI77|A0A2R8QI77_DANRE	Periaxin OS=Danio rerio OX=7955 GN=prx PE=4 SV=1			0	99	FKPSGADVNVK				-0.00588998	1160.61	387.878	1160.62	387.88	3	15	1.1.1.2845.7	16.7443	464.73	332.37	16.62	0.29	5095.1
1	194.25	194.25	79.32	49.37	47.18	tr|A0A2R8QI77|A0A2R8QI77_DANRE	Periaxin OS=Danio rerio OX=7955 GN=prx PE=4 SV=1			0	99	FNIPSVDISLPK				-0.00292191	1328.73	665.373	1328.73	665.374	2	11	1.1.1.3195.9	36.9503	657.37	365.09	37.22	0.98	1863.25
1	194.25	194.25	79.32	49.37	47.18	tr|A0A2R8QI77|A0A2R8QI77_DANRE	Periaxin OS=Danio rerio OX=7955 GN=prx PE=4 SV=1			0	99	FNIPSVDISLPK				-0.00292191	1328.73	665.373	1328.73	665.374	2	12	1.1.1.3197.8	37.0646	657.37	535.65	37.22	0.98	2848.55
1	194.25	194.25	79.32	49.37	47.18	tr|A0A2R8QI77|A0A2R8QI77_DANRE	Periaxin OS=Danio rerio OX=7955 GN=prx PE=4 SV=1			0	99	FNIPSVDISLPK				-0.00292191	1328.73	665.373	1328.73	665.374	2	12	1.1.1.3199.10	37.1838	657.37	638.82	37.22	0.98	3083.91
1	194.25	194.25	79.32	49.37	47.18	tr|A0A2R8QI77|A0A2R8QI77_DANRE	Periaxin OS=Danio rerio OX=7955 GN=prx PE=4 SV=1			0	99	FNIPSVDISLPK				-0.00292191	1328.73	665.373	1328.73	665.374	2	14	1.1.1.3201.6	37.3013	657.37	631.4	37.22	0.98	3062.04
1	194.25	194.25	79.32	49.37	47.18	tr|A0A2R8QI77|A0A2R8QI77_DANRE	Periaxin OS=Danio rerio OX=7955 GN=prx PE=4 SV=1			0	99	FNIPSVDISLPK				-0.00292191	1328.73	665.373	1328.73	665.374	2	12	1.1.1.3207.6	37.6399	657.37	335.01	37.22	0.98	2038.71
1	194.25	194.25	79.32	49.37	47.18	tr|A0A2R8QI77|A0A2R8QI77_DANRE	Periaxin OS=Danio rerio OX=7955 GN=prx PE=4 SV=1			0	99	FNIPSVDISLPK				-0.00292191	1328.73	665.373	1328.73	665.374	2	12	1.1.1.3210.7	37.8217	657.37	307.75	37.22	0.98	1625.13
1	194.25	194.25	79.32	49.37	47.18	tr|A0A2R8QI77|A0A2R8QI77_DANRE	Periaxin OS=Danio rerio OX=7955 GN=prx PE=4 SV=1			0	99	FNIPSVDISLPK				-0.00292191	1328.73	665.373	1328.73	665.374	2	10	1.1.1.3212.9	37.9374	657.37	271.29	37.22	0.98	1594.74
1	194.25	194.25	79.32	49.37	47.18	tr|A0A2R8QI77|A0A2R8QI77_DANRE	Periaxin OS=Danio rerio OX=7955 GN=prx PE=4 SV=1			0	99	FNIPSVDISLPK				-0.00292191	1328.73	665.373	1328.73	665.374	2	9	1.1.1.3222.10	38.5192	657.37	189.82	37.22	0.98	1231.52
1	194.25	194.25	79.32	49.37	47.18	tr|A0A2R8QI77|A0A2R8QI77_DANRE	Periaxin OS=Danio rerio OX=7955 GN=prx PE=4 SV=1			0	99	FNIPSVDISLPK				-0.00292191	1328.73	665.373	1328.73	665.374	2	9	1.1.1.3214.5	38.0465	657.37	220.53	37.22	0.98	1614.53
1	194.25	194.25	79.32	49.37	47.18	tr|A0A2R8QI77|A0A2R8QI77_DANRE	Periaxin OS=Danio rerio OX=7955 GN=prx PE=4 SV=1			0	99	FNIPSVDISLPK				-0.00292191	1328.73	665.373	1328.73	665.374	2	8	1.1.1.3232.3	39.084	194.42	128.77	38.5	0.81	1104.64
1	194.25	194.25	79.32	49.37	47.18	tr|A0A2R8QI77|A0A2R8QI77_DANRE	Periaxin OS=Danio rerio OX=7955 GN=prx PE=4 SV=1			0	99	FNMPSIDISLPR	Deamidated(N)@2			0.0145501	1389.71	695.863	1389.7	695.855	2	13	1.1.1.3225.5	38.686	345.72	339.76	38.73	1.21	2297.9
1	194.25	194.25	79.32	49.37	47.18	tr|A0A2R8QI77|A0A2R8QI77_DANRE	Periaxin OS=Danio rerio OX=7955 GN=prx PE=4 SV=1			0	99	FNMPSIDISLPR	Oxidation(M)@3			-0.00930878	1404.7	703.356	1404.71	703.361	2	9	1.1.1.3114.23	32.2849	730.42	669.24	32.36	1.91	2453.44
1	194.25	194.25	79.32	49.37	47.18	tr|A0A2R8QI77|A0A2R8QI77_DANRE	Periaxin OS=Danio rerio OX=7955 GN=prx PE=4 SV=1			0	99	FNMPSIDISLPR	Deamidated(N)@2			0.0145501	1389.71	695.863	1389.7	695.855	2	11	1.1.1.3224.7	38.6348	345.72	317.16	38.73	1.21	2280.11
1	194.25	194.25	79.32	49.37	47.18	tr|A0A2R8QI77|A0A2R8QI77_DANRE	Periaxin OS=Danio rerio OX=7955 GN=prx PE=4 SV=1			0	99	FNMPSIDISLPR	Deamidated(N)@2			0.0145501	1389.71	695.863	1389.7	695.855	2	11	1.1.1.3228.8	38.8695	345.72	281.49	38.73	1.21	1891.98
1	194.25	194.25	79.32	49.37	47.18	tr|A0A2R8QI77|A0A2R8QI77_DANRE	Periaxin OS=Danio rerio OX=7955 GN=prx PE=4 SV=1			0	99	FNMPSIDISLPR	Oxidation(M)@3			-0.00930878	1404.7	703.356	1404.71	703.361	2	9	1.1.1.3116.22	32.3993	730.42	724.38	32.36	1.91	2493.23
1	194.25	194.25	79.32	49.37	47.18	tr|A0A2R8QI77|A0A2R8QI77_DANRE	Periaxin OS=Danio rerio OX=7955 GN=prx PE=4 SV=1			0	99	FNMPSIDISLPR	Oxidation(M)@3			-0.00930878	1404.7	703.356	1404.71	703.361	2	9	1.1.1.3112.22	32.1673	730.42	682.34	32.36	1.91	2413.14
1	194.25	194.25	79.32	49.37	47.18	tr|A0A2R8QI77|A0A2R8QI77_DANRE	Periaxin OS=Danio rerio OX=7955 GN=prx PE=4 SV=1			0	99	FNMPSIDISLPR	Deamidated(N)@2			0.0145501	1389.71	695.863	1389.7	695.855	2	11	1.1.1.3227.5	38.8017	345.72	292.77	38.73	1.21	2470.56
1	194.25	194.25	79.32	49.37	47.18	tr|A0A2R8QI77|A0A2R8QI77_DANRE	Periaxin OS=Danio rerio OX=7955 GN=prx PE=4 SV=1			0	99	FNMPSIDISLPR	Deamidated(N)@2			0.0145501	1389.71	695.863	1389.7	695.855	2	10	1.1.1.3231.4	39.0295	345.72	272.06	38.73	1.21	2229.66
1	194.25	194.25	79.32	49.37	47.18	tr|A0A2R8QI77|A0A2R8QI77_DANRE	Periaxin OS=Danio rerio OX=7955 GN=prx PE=4 SV=1			0	98.61	FNMPSIDISLPR	Oxidation(M)@3			-0.00930878	1404.7	703.356	1404.71	703.361	2	8	1.1.1.3110.22	32.0513	730.42	607.9	32.36	1.91	2413.84
1	194.25	194.25	79.32	49.37	47.18	tr|A0A2R8QI77|A0A2R8QI77_DANRE	Periaxin OS=Danio rerio OX=7955 GN=prx PE=4 SV=1			0	93.13	FNMPSIDISLPR	Oxidation(M)@3			-0.00930878	1404.7	703.356	1404.71	703.361	2	7	1.1.1.3123.13	32.7899	730.42	500.93	32.36	1.91	1949.32
1	194.25	194.25	79.32	49.37	47.18	tr|A0A2R8QI77|A0A2R8QI77_DANRE	Periaxin OS=Danio rerio OX=7955 GN=prx PE=4 SV=1			0	77	FNMPSIDISLPR	Oxidation(M)@3			-0.00930878	1404.7	703.356	1404.71	703.361	2	7	1.1.1.3121.14	32.6756	730.42	528.06	32.36	1.91	2085.2
1	194.25	194.25	79.32	49.37	47.18	tr|A0A2R8QI77|A0A2R8QI77_DANRE	Periaxin OS=Danio rerio OX=7955 GN=prx PE=4 SV=1			0	18.76	FNMPSIDISLPR	Deamidated(N)@2			0.0145501	1389.71	695.863	1389.7	695.855	2	8	1.1.1.3220.6	38.4002	345.72	208.76	38.73	1.21	2007.96
1	194.25	194.25	79.32	49.37	47.18	tr|A0A2R8QI77|A0A2R8QI77_DANRE	Periaxin OS=Danio rerio OX=7955 GN=prx PE=4 SV=1			0	15.5	FNMPSIDISLPR				-0.00241439	1388.71	695.362	1388.71	695.363	2	6	1.1.1.3289.4	42.3806	183.9	114.61	41.27	1.44	1045.95
1	194.25	194.25	79.32	49.37	47.18	tr|A0A2R8QI77|A0A2R8QI77_DANRE	Periaxin OS=Danio rerio OX=7955 GN=prx PE=4 SV=1			0	99	FNMPSVDISLPGGK	Oxidation(M)@3			-0.00243025	1476.73	739.37	1476.73	739.371	2	16	1.1.1.3056.26	28.9343	381.11	365	29.18	1.68	1705.92
1	194.25	194.25	79.32	49.37	47.18	tr|A0A2R8QI77|A0A2R8QI77_DANRE	Periaxin OS=Danio rerio OX=7955 GN=prx PE=4 SV=1			0	99	FNMPSVDISLPGGK	Oxidation(M)@3			-0.00243025	1476.73	739.37	1476.73	739.371	2	17	1.1.1.3062.23	29.2808	381.11	333.63	29.18	1.68	2030.35
1	194.25	194.25	79.32	49.37	47.18	tr|A0A2R8QI77|A0A2R8QI77_DANRE	Periaxin OS=Danio rerio OX=7955 GN=prx PE=4 SV=1			0	99	FNMPSVDISLPGGK	Oxidation(M)@3			-0.00243025	1476.73	739.37	1476.73	739.371	2	16	1.1.1.3064.16	29.3929	381.11	331.28	29.18	1.68	2165.33
1	194.25	194.25	79.32	49.37	47.18	tr|A0A2R8QI77|A0A2R8QI77_DANRE	Periaxin OS=Danio rerio OX=7955 GN=prx PE=4 SV=1			0	99	FNMPSVDISLPGGK				-0.00119008	1460.73	731.373	1460.73	731.374	2	13	1.1.1.3168.8	35.3952	380.92	333.45	35.55	1.68	1920.57
1	194.25	194.25	79.32	49.37	47.18	tr|A0A2R8QI77|A0A2R8QI77_DANRE	Periaxin OS=Danio rerio OX=7955 GN=prx PE=4 SV=1			0	99	FNMPSVDISLPGGK				-0.00119008	1460.73	731.373	1460.73	731.374	2	13	1.1.1.3171.12	35.567	380.92	371.38	35.55	1.68	1748.07
1	194.25	194.25	79.32	49.37	47.18	tr|A0A2R8QI77|A0A2R8QI77_DANRE	Periaxin OS=Danio rerio OX=7955 GN=prx PE=4 SV=1			0	99	FNMPSVDISLPGGK	Oxidation(M)@3			-0.00243025	1476.73	739.37	1476.73	739.371	2	11	1.1.1.3070.17	29.7399	381.11	234.8	29.18	1.68	2072.64
1	194.25	194.25	79.32	49.37	47.18	tr|A0A2R8QI77|A0A2R8QI77_DANRE	Periaxin OS=Danio rerio OX=7955 GN=prx PE=4 SV=1			0	99	GDQLLSAR				-0.00387654	858.452	430.233	858.456	430.235	2	11	1.1.1.2851.10	17.093	509	507.23	17.25	1.55	5714.86
1	194.25	194.25	79.32	49.37	47.18	tr|A0A2R8QI77|A0A2R8QI77_DANRE	Periaxin OS=Danio rerio OX=7955 GN=prx PE=4 SV=1			0	99	GENSHMPTIDISLPK				0.00340149	1637.81	546.944	1637.81	546.943	3	15	1.1.1.3081.10	30.3526	354.24	235.45	30.04	1.1	2510.45
1	194.25	194.25	79.32	49.37	47.18	tr|A0A2R8QI77|A0A2R8QI77_DANRE	Periaxin OS=Danio rerio OX=7955 GN=prx PE=4 SV=1			0	99	GENSHMPTIDISLPK				0.00340149	1637.81	546.944	1637.81	546.943	3	14	1.1.1.3079.10	30.2404	354.24	230.06	30.04	1.1	2368.19
1	194.25	194.25	79.32	49.37	47.18	tr|A0A2R8QI77|A0A2R8QI77_DANRE	Periaxin OS=Danio rerio OX=7955 GN=prx PE=4 SV=1			0	99	GGAEGDVDVEGHGGK				0.00188547	1382.61	461.877	1382.61	461.876	3	20	1.1.1.2815.7	15.0329	1749.71	1461.99	15.13	0.4	9237.25
1	194.25	194.25	79.32	49.37	47.18	tr|A0A2R8QI77|A0A2R8QI77_DANRE	Periaxin OS=Danio rerio OX=7955 GN=prx PE=4 SV=1			0	99	GGAEGDVDVEGHGGK				0.00188547	1382.61	461.877	1382.61	461.876	3	20	1.1.1.2817.4	15.1423	1749.71	1731.04	15.13	0.4	9409.62
1	194.25	194.25	79.32	49.37	47.18	tr|A0A2R8QI77|A0A2R8QI77_DANRE	Periaxin OS=Danio rerio OX=7955 GN=prx PE=4 SV=1			0	99	GGAEGDVDVEGHGGK				0.00188547	1382.61	461.877	1382.61	461.876	3	20	1.1.1.2819.7	15.2618	1749.71	1329.61	15.13	0.4	6927.63
1	194.25	194.25	79.32	49.37	47.18	tr|A0A2R8QI77|A0A2R8QI77_DANRE	Periaxin OS=Danio rerio OX=7955 GN=prx PE=4 SV=1			0	99	GGAEGDVDVEGHGGK				0.00188547	1382.61	461.877	1382.61	461.876	3	18	1.1.1.2821.7	15.3767	1749.71	910.42	15.13	0.4	4684.08
1	194.25	194.25	79.32	49.37	47.18	tr|A0A2R8QI77|A0A2R8QI77_DANRE	Periaxin OS=Danio rerio OX=7955 GN=prx PE=4 SV=1			0	99	GGAEGDVDVEGHGGK				0.00188547	1382.61	461.877	1382.61	461.876	3	16	1.1.1.2823.5	15.4876	1749.71	605.39	15.13	0.4	2941.99
1	194.25	194.25	79.32	49.37	47.18	tr|A0A2R8QI77|A0A2R8QI77_DANRE	Periaxin OS=Danio rerio OX=7955 GN=prx PE=4 SV=1			0	99	GGAEGDVDVEGHGGK				-0.0016851	1382.6	461.875	1382.61	461.876	3	16	1.1.1.2828.13	15.7837	536.09	521.03	15.88	1.37	2527.61
1	194.25	194.25	79.32	49.37	47.18	tr|A0A2R8QI77|A0A2R8QI77_DANRE	Periaxin OS=Danio rerio OX=7955 GN=prx PE=4 SV=1			0	99	GGAEGDVDVEGHGGK				-0.0016851	1382.6	461.875	1382.61	461.876	3	13	1.1.1.2831.7	15.9439	536.09	486.67	15.88	1.37	2964.44
1	194.25	194.25	79.32	49.37	47.18	tr|A0A2R8QI77|A0A2R8QI77_DANRE	Periaxin OS=Danio rerio OX=7955 GN=prx PE=4 SV=1			0	99	GGAEGDVDVEGHGGK				-0.0016851	1382.6	461.875	1382.61	461.876	3	15	1.1.1.2833.7	16.0575	536.09	438.78	15.88	1.37	2464.53
1	194.25	194.25	79.32	49.37	47.18	tr|A0A2R8QI77|A0A2R8QI77_DANRE	Periaxin OS=Danio rerio OX=7955 GN=prx PE=4 SV=1			0	99	GGAEGDVDVEGHGGK				-0.0016851	1382.6	461.875	1382.61	461.876	3	13	1.1.1.2835.12	16.1799	536.09	455.13	15.88	1.37	2208.79
1	194.25	194.25	79.32	49.37	47.18	tr|A0A2R8QI77|A0A2R8QI77_DANRE	Periaxin OS=Danio rerio OX=7955 GN=prx PE=4 SV=1			0	99	GGAEGDVDVEGHGGK				-0.0016851	1382.6	461.875	1382.61	461.876	3	16	1.1.1.2837.14	16.2975	536.09	407.08	15.88	1.37	2812.4
1	194.25	194.25	79.32	49.37	47.18	tr|A0A2R8QI77|A0A2R8QI77_DANRE	Periaxin OS=Danio rerio OX=7955 GN=prx PE=4 SV=1			0	99	GGAEGDVDVEGHGGK				-0.0016851	1382.6	461.875	1382.61	461.876	3	15	1.1.1.2839.14	16.4119	536.09	341.72	15.88	1.37	2505.56
1	194.25	194.25	79.32	49.37	47.18	tr|A0A2R8QI77|A0A2R8QI77_DANRE	Periaxin OS=Danio rerio OX=7955 GN=prx PE=4 SV=1			0	99	GGAEGDVDVEGHGGK				-0.0016851	1382.6	461.875	1382.61	461.876	3	15	1.1.1.2841.17	16.5313	536.09	343.08	15.88	1.37	2413.64
1	194.25	194.25	79.32	49.37	47.18	tr|A0A2R8QI77|A0A2R8QI77_DANRE	Periaxin OS=Danio rerio OX=7955 GN=prx PE=4 SV=1			0	99	GGAEGDVDVEGHGGK				-0.00772759	1382.6	461.873	1382.61	461.876	3	15	1.1.1.2843.14	16.641	321.27	308.09	17.02	1.9	2526.21
1	194.25	194.25	79.32	49.37	47.18	tr|A0A2R8QI77|A0A2R8QI77_DANRE	Periaxin OS=Danio rerio OX=7955 GN=prx PE=4 SV=1			0	99	GGAEGDVDVEGHGGK				0.0114985	1382.62	461.88	1382.61	461.876	3	10	1.1.1.2887.6	19.1558	250.97	198.06	18.92	0.57	1907.17
1	194.25	194.25	79.32	49.37	47.18	tr|A0A2R8QI77|A0A2R8QI77_DANRE	Periaxin OS=Danio rerio OX=7955 GN=prx PE=4 SV=1			0	99	GGAEGDVDVEGYGGK				0.00321029	1408.61	705.314	1408.61	705.313	2	16	1.1.1.2884.30	19.0263	417.98	233.82	18.63	0.69	1319.46
1	194.25	194.25	79.32	49.37	47.18	tr|A0A2R8QI77|A0A2R8QI77_DANRE	Periaxin OS=Danio rerio OX=7955 GN=prx PE=4 SV=1			0	99	GGAEGDVDVK				0.00109761	945.441	473.728	945.44	473.727	2	15	1.1.1.2812.5	14.8746	309.71	286.73	15.08	0.74	1607.79
1	194.25	194.25	79.32	49.37	47.18	tr|A0A2R8QI77|A0A2R8QI77_DANRE	Periaxin OS=Danio rerio OX=7955 GN=prx PE=4 SV=1			0	99	GGAEGDVDVK				0.00109761	945.441	473.728	945.44	473.727	2	16	1.1.1.2816.8	15.1034	309.71	299.3	15.08	0.74	1578.85
1	194.25	194.25	79.32	49.37	47.18	tr|A0A2R8QI77|A0A2R8QI77_DANRE	Periaxin OS=Danio rerio OX=7955 GN=prx PE=4 SV=1			0	64.88	GGAEGDVDVK				0.00347799	945.444	473.729	945.44	473.727	2	7	1.1.1.2827.8	15.7187	275.47	217.03	15.59	0.68	956.632
1	194.25	194.25	79.32	49.37	47.18	tr|A0A2R8QI77|A0A2R8QI77_DANRE	Periaxin OS=Danio rerio OX=7955 GN=prx PE=4 SV=1			0	99	GGAESDVDVAGHGGK				0.00403278	1354.62	452.546	1354.61	452.544	3	15	1.1.1.2818.10	15.2144	558.18	514.45	15.14	0.34	2986.46
1	194.25	194.25	79.32	49.37	47.18	tr|A0A2R8QI77|A0A2R8QI77_DANRE	Periaxin OS=Danio rerio OX=7955 GN=prx PE=4 SV=1			0	99	GGAESDVDVAGHGGK				0.00403278	1354.62	452.546	1354.61	452.544	3	14	1.1.1.2818.11	15.2178	558.18	511.59	15.14	0.34	2184.53
1	194.25	194.25	79.32	49.37	47.18	tr|A0A2R8QI77|A0A2R8QI77_DANRE	Periaxin OS=Danio rerio OX=7955 GN=prx PE=4 SV=1			0	99	GGAESDVDVAGHGGK				0.00403278	1354.62	452.546	1354.61	452.544	3	13	1.1.1.2820.11	15.3291	558.18	342.66	15.14	0.34	2648.13
1	194.25	194.25	79.32	49.37	47.18	tr|A0A2R8QI77|A0A2R8QI77_DANRE	Periaxin OS=Danio rerio OX=7955 GN=prx PE=4 SV=1			0	99	GGAGADVDVK				0.00223846	887.437	444.726	887.435	444.725	2	13	1.1.1.2815.6	15.0313	245.24	235.49	15.25	0.86	2497.36
1	194.25	194.25	79.32	49.37	47.18	tr|A0A2R8QI77|A0A2R8QI77_DANRE	Periaxin OS=Danio rerio OX=7955 GN=prx PE=4 SV=1			0	99	GGAGADVDVK				0.00223846	887.437	444.726	887.435	444.725	2	13	1.1.1.2819.5	15.2584	245.24	243.48	15.25	0.86	2375.16
1	194.25	194.25	79.32	49.37	47.18	tr|A0A2R8QI77|A0A2R8QI77_DANRE	Periaxin OS=Danio rerio OX=7955 GN=prx PE=4 SV=1			0	99	GGAGGDVDVEGHGGK				0.000979805	1310.59	437.869	1310.59	437.869	3	19	1.1.1.2806.4	14.545	339.32	279.25	14.62	0.8	4060.39
1	194.25	194.25	79.32	49.37	47.18	tr|A0A2R8QI77|A0A2R8QI77_DANRE	Periaxin OS=Danio rerio OX=7955 GN=prx PE=4 SV=1			0	99	GGAGGDVDVEGHGGK				0.000979805	1310.59	437.869	1310.59	437.869	3	21	1.1.1.2808.4	14.6376	339.32	332.7	14.62	0.8	3895.94
1	194.25	194.25	79.32	49.37	47.18	tr|A0A2R8QI77|A0A2R8QI77_DANRE	Periaxin OS=Danio rerio OX=7955 GN=prx PE=4 SV=1			0	99	GGAGGDVDVEGHGGK				0.000979805	1310.59	437.869	1310.59	437.869	3	19	1.1.1.2811.4	14.7991	339.32	275.17	14.62	0.8	2970.53
1	194.25	194.25	79.32	49.37	47.18	tr|A0A2R8QI77|A0A2R8QI77_DANRE	Periaxin OS=Danio rerio OX=7955 GN=prx PE=4 SV=1			0	49.02	GGAGGDVDVEGHGGK				0.000979805	1310.59	437.869	1310.59	437.869	3	9	1.1.1.2841.15	16.528	193.34	191.75	16.5	1.31	3321.36
1	194.25	194.25	79.32	49.37	47.18	tr|A0A2R8QI77|A0A2R8QI77_DANRE	Periaxin OS=Danio rerio OX=7955 GN=prx PE=4 SV=1			0	97.98	GGKFEIPKNDVSLPK			missed K-F@3; missed K-N@8	0.00805841	1627.9	407.983	1627.89	407.981	4	8	1.1.1.2991.5	25.1432	69.47	63.76	25.31	0.69	3226.17
1	194.25	194.25	79.32	49.37	47.18	tr|A0A2R8QI77|A0A2R8QI77_DANRE	Periaxin OS=Danio rerio OX=7955 GN=prx PE=4 SV=1			0	96.28	GGKFEIPKNDVSLPK			missed K-F@3; missed K-N@8	0.00805841	1627.9	407.983	1627.89	407.981	4	7	1.1.1.2993.4	25.2569	69.47	63.57	25.31	0.69	3378.03
1	194.25	194.25	79.32	49.37	47.18	tr|A0A2R8QI77|A0A2R8QI77_DANRE	Periaxin OS=Danio rerio OX=7955 GN=prx PE=4 SV=1			0	94.25	GGKFEIPKNDVSLPK			missed K-F@3; missed K-N@8	0.00805841	1627.9	407.983	1627.89	407.981	4	7	1.1.1.2995.4	25.3724	69.47	40.42	25.31	0.69	2958.42
1	194.25	194.25	79.32	49.37	47.18	tr|A0A2R8QI77|A0A2R8QI77_DANRE	Periaxin OS=Danio rerio OX=7955 GN=prx PE=4 SV=1			0	26.92	GGKFEIPKNDVSLPK			missed K-F@3; missed K-N@8	-0.025416	1627.87	407.974	1627.89	407.981	4	5	1.1.1.3045.4	28.2602	22.67	22.07	28.25	0.17	1338.05
1	194.25	194.25	79.32	49.37	47.18	tr|A0A2R8QI77|A0A2R8QI77_DANRE	Periaxin OS=Danio rerio OX=7955 GN=prx PE=4 SV=1			0	83.93	GGKLEMPKLDVSLPK	Oxidation(M)@6		missed K-L@3; missed K-L@8	-0.0049459	1626.9	407.731	1626.9	407.733	4	6	1.1.1.3004.6	25.895	74.45	63.8	25.6	0.58	2106.01
1	194.25	194.25	79.32	49.37	47.18	tr|A0A2R8QI77|A0A2R8QI77_DANRE	Periaxin OS=Danio rerio OX=7955 GN=prx PE=4 SV=1			0	76.79	GGKLEMPKLDVSLPK	Oxidation(M)@6		missed K-L@3; missed K-L@8	-0.0049459	1626.9	407.731	1626.9	407.733	4	6	1.1.1.2999.4	25.603	74.45	72.25	25.6	0.58	2361.45
1	194.25	194.25	79.32	49.37	47.18	tr|A0A2R8QI77|A0A2R8QI77_DANRE	Periaxin OS=Danio rerio OX=7955 GN=prx PE=4 SV=1			0	99	GGQFEMPK	Oxidation(M)@6			0.00115572	908.407	455.211	908.406	455.21	2	11	1.1.1.2821.6	15.3751	471.66	251.09	15.82	1.43	1446.52
1	194.25	194.25	79.32	49.37	47.18	tr|A0A2R8QI77|A0A2R8QI77_DANRE	Periaxin OS=Danio rerio OX=7955 GN=prx PE=4 SV=1			0	99	GGQFEMPK	Oxidation(M)@6			0.00115572	908.407	455.211	908.406	455.21	2	11	1.1.1.2823.4	15.4859	471.66	323.08	15.82	1.43	1803.56
1	194.25	194.25	79.32	49.37	47.18	tr|A0A2R8QI77|A0A2R8QI77_DANRE	Periaxin OS=Danio rerio OX=7955 GN=prx PE=4 SV=1			0	99	GGQFEMPK	Oxidation(M)@6			0.00115572	908.407	455.211	908.406	455.21	2	11	1.1.1.2825.4	15.5991	471.66	433.38	15.82	1.43	2262.45
1	194.25	194.25	79.32	49.37	47.18	tr|A0A2R8QI77|A0A2R8QI77_DANRE	Periaxin OS=Danio rerio OX=7955 GN=prx PE=4 SV=1			0	99	GGQFEMPK	Oxidation(M)@6			0.00115572	908.407	455.211	908.406	455.21	2	11	1.1.1.2827.5	15.7137	471.66	435.5	15.82	1.43	2311.26
1	194.25	194.25	79.32	49.37	47.18	tr|A0A2R8QI77|A0A2R8QI77_DANRE	Periaxin OS=Danio rerio OX=7955 GN=prx PE=4 SV=1			0	99	GGQFEMPK	Oxidation(M)@6			0.00115572	908.407	455.211	908.406	455.21	2	10	1.1.1.2829.8	15.8321	471.66	424.15	15.82	1.43	1986.42
1	194.25	194.25	79.32	49.37	47.18	tr|A0A2R8QI77|A0A2R8QI77_DANRE	Periaxin OS=Danio rerio OX=7955 GN=prx PE=4 SV=1			0	99	GGQFEMPK				0.010338	892.422	447.218	892.411	447.213	2	11	1.1.1.2927.5	21.4485	182.46	178.51	21.15	0.81	3871.65
1	194.25	194.25	79.32	49.37	47.18	tr|A0A2R8QI77|A0A2R8QI77_DANRE	Periaxin OS=Danio rerio OX=7955 GN=prx PE=4 SV=1			0	99	GGQFEMPK				0.00439785	892.416	447.215	892.411	447.213	2	10	1.1.1.2909.9	20.4159	284.56	246.3	20.23	1.21	3086.45
1	194.25	194.25	79.32	49.37	47.18	tr|A0A2R8QI77|A0A2R8QI77_DANRE	Periaxin OS=Danio rerio OX=7955 GN=prx PE=4 SV=1			0	99	GGQFEMPK	Oxidation(M)@6			0.00115572	908.407	455.211	908.406	455.21	2	8	1.1.1.2836.10	16.2337	471.66	302.47	15.82	1.43	1271.07
1	194.25	194.25	79.32	49.37	47.18	tr|A0A2R8QI77|A0A2R8QI77_DANRE	Periaxin OS=Danio rerio OX=7955 GN=prx PE=4 SV=1			0	99	GGQFEMPK	Oxidation(M)@6			0.00115572	908.407	455.211	908.406	455.21	2	8	1.1.1.2840.10	16.4624	471.66	247.39	15.82	1.43	1420.55
1	194.25	194.25	79.32	49.37	47.18	tr|A0A2R8QI77|A0A2R8QI77_DANRE	Periaxin OS=Danio rerio OX=7955 GN=prx PE=4 SV=1			0	94.57	GGQFEMPK	Oxidation(M)@6			-0.00525298	908.401	455.208	908.406	455.21	2	8	1.1.1.2879.9	18.7044	267.34	228.25	18.63	0.86	2397.41
1	194.25	194.25	79.32	49.37	47.18	tr|A0A2R8QI77|A0A2R8QI77_DANRE	Periaxin OS=Danio rerio OX=7955 GN=prx PE=4 SV=1			0	91.75	GGQFEMPK	Oxidation(M)@6			-0.00525298	908.401	455.208	908.406	455.21	2	8	1.1.1.2877.8	18.5874	267.34	264.64	18.63	0.86	2145.89
1	194.25	194.25	79.32	49.37	47.18	tr|A0A2R8QI77|A0A2R8QI77_DANRE	Periaxin OS=Danio rerio OX=7955 GN=prx PE=4 SV=1			0	72.29	GGQFEMPK	Deamidated(Q)@3; Oxidation(M)@6			0.00694942	909.397	455.706	909.39	455.702	2	7	1.1.1.2858.12	17.4991	184.85	170.48	17.42	0.92	1694.99
1	194.25	194.25	79.32	49.37	47.18	tr|A0A2R8QI77|A0A2R8QI77_DANRE	Periaxin OS=Danio rerio OX=7955 GN=prx PE=4 SV=1			0	99	GHSIPVDSEVEYEGPR				-0.000117981	1769.82	590.948	1769.82	590.948	3	16	1.1.1.2936.24	21.9998	765.07	760.35	22.02	0.52	5231.86
1	194.25	194.25	79.32	49.37	47.18	tr|A0A2R8QI77|A0A2R8QI77_DANRE	Periaxin OS=Danio rerio OX=7955 GN=prx PE=4 SV=1			0	99	GHSIPVDSEVEYEGPR				-0.000117981	1769.82	590.948	1769.82	590.948	3	18	1.1.1.2941.24	22.2884	765.07	386.36	22.02	0.52	3800.12
1	194.25	194.25	79.32	49.37	47.18	tr|A0A2R8QI77|A0A2R8QI77_DANRE	Periaxin OS=Danio rerio OX=7955 GN=prx PE=4 SV=1			0	75.94	GHSIPVDSEVEYEGPR				-0.00817462	1769.81	590.945	1769.82	590.948	3	7	1.1.1.2964.26	23.6187	184.1	127.6	23.17	0.69	1627.49
1	194.25	194.25	79.32	49.37	47.18	tr|A0A2R8QI77|A0A2R8QI77_DANRE	Periaxin OS=Danio rerio OX=7955 GN=prx PE=4 SV=1			0	24.63	GHSIPVDSEVEYEGPR				0.0026286	1769.82	590.949	1769.82	590.948	3	6	1.1.1.2969.24	23.904	169.85	159.82	23.86	1.1	1793.57
1	194.25	194.25	79.32	49.37	47.18	tr|A0A2R8QI77|A0A2R8QI77_DANRE	Periaxin OS=Danio rerio OX=7955 GN=prx PE=4 SV=1			0	24.23	GHSIPVDSEVEYEGPR				-0.000117981	1769.82	590.948	1769.82	590.948	3	9	1.1.1.2935.25	21.9438	765.07	728.47	22.02	0.52	4692.28
1	194.25	194.25	79.32	49.37	47.18	tr|A0A2R8QI77|A0A2R8QI77_DANRE	Periaxin OS=Danio rerio OX=7955 GN=prx PE=4 SV=1			0	19.92	GHSIPVDSEVEYEGPR				-0.000117981	1769.82	590.948	1769.82	590.948	3	9	1.1.1.2937.23	22.0559	765.07	711.55	22.02	0.52	6196.76
1	194.25	194.25	79.32	49.37	47.18	tr|A0A2R8QI77|A0A2R8QI77_DANRE	Periaxin OS=Danio rerio OX=7955 GN=prx PE=4 SV=1			0	99	HEISLPK				-0.00516237	822.455	412.235	822.46	412.237	2	9	1.1.1.2845.10	16.7493	526.08	520.47	16.73	0.86	4841.74
1	194.25	194.25	79.32	49.37	47.18	tr|A0A2R8QI77|A0A2R8QI77_DANRE	Periaxin OS=Danio rerio OX=7955 GN=prx PE=4 SV=1			0	99	HEISLPK				-0.00516237	822.455	412.235	822.46	412.237	2	9	1.1.1.2843.11	16.636	526.08	379.47	16.73	0.86	4007.51
1	194.25	194.25	79.32	49.37	47.18	tr|A0A2R8QI77|A0A2R8QI77_DANRE	Periaxin OS=Danio rerio OX=7955 GN=prx PE=4 SV=1			0	98.98	HEISLPK				-0.00516237	822.455	412.235	822.46	412.237	2	8	1.1.1.2849.6	16.9727	526.08	325.57	16.73	0.86	3751.96
1	194.25	194.25	79.32	49.37	47.18	tr|A0A2R8QI77|A0A2R8QI77_DANRE	Periaxin OS=Danio rerio OX=7955 GN=prx PE=4 SV=1			0	99	IDLAFPK				0.00262452	802.461	402.238	802.459	402.237	2	11	1.1.1.3012.3	26.3518	521	374.7	26.17	1.1	3029.11
1	194.25	194.25	79.32	49.37	47.18	tr|A0A2R8QI77|A0A2R8QI77_DANRE	Periaxin OS=Danio rerio OX=7955 GN=prx PE=4 SV=1			0	99	IDLAFPK				0.00262452	802.461	402.238	802.459	402.237	2	10	1.1.1.3014.3	26.4675	521	333.34	26.17	1.1	3036.21
1	194.25	194.25	79.32	49.37	47.18	tr|A0A2R8QI77|A0A2R8QI77_DANRE	Periaxin OS=Danio rerio OX=7955 GN=prx PE=4 SV=1			0	99	IDLAFPK				0.00262452	802.461	402.238	802.459	402.237	2	10	1.1.1.3006.4	26.007	521	421.77	26.17	1.1	3787.86
1	194.25	194.25	79.32	49.37	47.18	tr|A0A2R8QI77|A0A2R8QI77_DANRE	Periaxin OS=Danio rerio OX=7955 GN=prx PE=4 SV=1			0	99	IDLAFPK				0.00262452	802.461	402.238	802.459	402.237	2	10	1.1.1.3010.3	26.2365	521	478.1	26.17	1.1	3480.12
1	194.25	194.25	79.32	49.37	47.18	tr|A0A2R8QI77|A0A2R8QI77_DANRE	Periaxin OS=Danio rerio OX=7955 GN=prx PE=4 SV=1			0	99	IDLAFPK				0.00262452	802.461	402.238	802.459	402.237	2	10	1.1.1.3004.5	25.8934	521	371.04	26.17	1.1	3322.36
1	194.25	194.25	79.32	49.37	47.18	tr|A0A2R8QI77|A0A2R8QI77_DANRE	Periaxin OS=Danio rerio OX=7955 GN=prx PE=4 SV=1			0	99	IDLAFPK				0.00262452	802.461	402.238	802.459	402.237	2	9	1.1.1.3008.6	26.1258	521	482.81	26.17	1.1	4041.92
1	194.25	194.25	79.32	49.37	47.18	tr|A0A2R8QI77|A0A2R8QI77_DANRE	Periaxin OS=Danio rerio OX=7955 GN=prx PE=4 SV=1			0	99	IDLAFPK				0.00262452	802.461	402.238	802.459	402.237	2	8	1.1.1.3016.3	26.583	521	280.92	26.17	1.1	2596.7
1	194.25	194.25	79.32	49.37	47.18	tr|A0A2R8QI77|A0A2R8QI77_DANRE	Periaxin OS=Danio rerio OX=7955 GN=prx PE=4 SV=1			0	99	IDLAFPK				0.00262452	802.461	402.238	802.459	402.237	2	8	1.1.1.3020.3	26.8143	521	217.08	26.17	1.1	2138.5
1	194.25	194.25	79.32	49.37	47.18	tr|A0A2R8QI77|A0A2R8QI77_DANRE	Periaxin OS=Danio rerio OX=7955 GN=prx PE=4 SV=1			0	94.67	IDLAFPK				0.00281689	802.462	402.238	802.459	402.237	2	7	1.1.1.3032.3	27.5072	156.18	155.36	27.5	0.98	1695.98
1	194.25	194.25	79.32	49.37	47.18	tr|A0A2R8QI77|A0A2R8QI77_DANRE	Periaxin OS=Danio rerio OX=7955 GN=prx PE=4 SV=1			0	37.23	IDLAFPK				-0.00975639	802.449	402.232	802.459	402.237	2	5	1.1.1.3087.2	30.6847	67.52	54.61	30.45	0.93	917.04
1	194.25	194.25	79.32	49.37	47.18	tr|A0A2R8QI77|A0A2R8QI77_DANRE	Periaxin OS=Danio rerio OX=7955 GN=prx PE=4 SV=1			0	99	INLDVSDPK				-0.00172826	999.522	500.768	999.524	500.769	2	13	1.1.1.2899.17	19.8561	774.11	749.27	19.88	1.26	4130.09
1	194.25	194.25	79.32	49.37	47.18	tr|A0A2R8QI77|A0A2R8QI77_DANRE	Periaxin OS=Danio rerio OX=7955 GN=prx PE=4 SV=1			0	99	INLDVSDPK				-0.00172826	999.522	500.768	999.524	500.769	2	12	1.1.1.2901.16	19.9691	774.11	739.34	19.88	1.26	3747.96
1	194.25	194.25	79.32	49.37	47.18	tr|A0A2R8QI77|A0A2R8QI77_DANRE	Periaxin OS=Danio rerio OX=7955 GN=prx PE=4 SV=1			0	99	INLDVSDPK				-0.00172826	999.522	500.768	999.524	500.769	2	12	1.1.1.2916.17	20.8332	774.11	300.13	19.88	1.26	2243.57
1	194.25	194.25	79.32	49.37	47.18	tr|A0A2R8QI77|A0A2R8QI77_DANRE	Periaxin OS=Danio rerio OX=7955 GN=prx PE=4 SV=1			0	99	INLDVSDPK	Deamidated(N)@2			0.0152351	1000.52	501.269	1000.51	501.261	2	10	1.1.1.2905.16	20.1988	455.72	282.33	19.88	0.86	2621.39
1	194.25	194.25	79.32	49.37	47.18	tr|A0A2R8QI77|A0A2R8QI77_DANRE	Periaxin OS=Danio rerio OX=7955 GN=prx PE=4 SV=1			0	81.73	INLDVSDPK	Deamidated(N)@2			-0.00108566	1000.51	501.261	1000.51	501.261	2	8	1.1.1.2919.12	20.9984	315.62	310.06	21.15	0.75	2310.37
1	194.25	194.25	79.32	49.37	47.18	tr|A0A2R8QI77|A0A2R8QI77_DANRE	Periaxin OS=Danio rerio OX=7955 GN=prx PE=4 SV=1			0	99	INVEGPDIK				-0.00166384	983.527	492.771	983.529	492.772	2	12	1.1.1.2883.9	18.9345	836.93	733.78	18.98	0.57	4339.64
1	194.25	194.25	79.32	49.37	47.18	tr|A0A2R8QI77|A0A2R8QI77_DANRE	Periaxin OS=Danio rerio OX=7955 GN=prx PE=4 SV=1			0	99	INVEGPDIK				-0.00166384	983.527	492.771	983.529	492.772	2	12	1.1.1.2890.17	19.3438	836.93	504.46	18.98	0.57	3301.5
1	194.25	194.25	79.32	49.37	47.18	tr|A0A2R8QI77|A0A2R8QI77_DANRE	Periaxin OS=Danio rerio OX=7955 GN=prx PE=4 SV=1			0	99	INVEGPDIK	Deamidated(N)@2			0.00553386	984.518	493.266	984.513	493.264	2	11	1.1.1.2887.8	19.1592	471.55	398.15	19.03	0.91	3289.47
1	194.25	194.25	79.32	49.37	47.18	tr|A0A2R8QI77|A0A2R8QI77_DANRE	Periaxin OS=Danio rerio OX=7955 GN=prx PE=4 SV=1			0	97.86	INVEGPDIK				0.0130295	983.542	492.778	983.529	492.772	2	9	2.1.1.2913.18	19.5414	211.1	203.39	19.28	0.57	2936.64
1	194.25	194.25	79.32	49.37	47.18	tr|A0A2R8QI77|A0A2R8QI77_DANRE	Periaxin OS=Danio rerio OX=7955 GN=prx PE=4 SV=1			0	99	LDISLPK				-0.000365648	784.469	393.242	784.469	393.242	2	10	1.1.1.3006.3	26.0053	322.5	314.71	26.11	1.56	2620.21
1	194.25	194.25	79.32	49.37	47.18	tr|A0A2R8QI77|A0A2R8QI77_DANRE	Periaxin OS=Danio rerio OX=7955 GN=prx PE=4 SV=1			0	99	LDISLPK				-0.000365648	784.469	393.242	784.469	393.242	2	9	1.1.1.3023.2	26.986	322.5	190.75	26.11	1.56	1755.34
1	194.25	194.25	79.32	49.37	47.18	tr|A0A2R8QI77|A0A2R8QI77_DANRE	Periaxin OS=Danio rerio OX=7955 GN=prx PE=4 SV=1			0	99	LDISLPK				-0.000365648	784.469	393.242	784.469	393.242	2	9	1.1.1.3008.5	26.1242	322.5	316.9	26.11	1.56	2633.3
1	194.25	194.25	79.32	49.37	47.18	tr|A0A2R8QI77|A0A2R8QI77_DANRE	Periaxin OS=Danio rerio OX=7955 GN=prx PE=4 SV=1			0	97.46	LDISLPK				-0.000365648	784.469	393.242	784.469	393.242	2	8	1.1.1.3019.2	26.7548	322.5	215.11	26.11	1.56	2100.2
1	194.25	194.25	79.32	49.37	47.18	tr|A0A2R8QI77|A0A2R8QI77_DANRE	Periaxin OS=Danio rerio OX=7955 GN=prx PE=4 SV=1			0	97.42	LDISLPK				1.18443e-05	784.469	393.242	784.469	393.242	2	6	1.1.1.3052.2	28.6613	131.03	111.56	28.14	1.21	1419.04
1	194.25	194.25	79.32	49.37	47.18	tr|A0A2R8QI77|A0A2R8QI77_DANRE	Periaxin OS=Danio rerio OX=7955 GN=prx PE=4 SV=1			0	91.95	LDISLPK				-0.000365648	784.469	393.242	784.469	393.242	2	9	1.1.1.3013.2	26.408	322.5	265.45	26.11	1.56	2288.46
1	194.25	194.25	79.32	49.37	47.18	tr|A0A2R8QI77|A0A2R8QI77_DANRE	Periaxin OS=Danio rerio OX=7955 GN=prx PE=4 SV=1			0	91.75	LDISLPK				-0.000365648	784.469	393.242	784.469	393.242	2	10	1.1.1.3015.2	26.5236	322.5	253.54	26.11	1.56	2328.05
1	194.25	194.25	79.32	49.37	47.18	tr|A0A2R8QI77|A0A2R8QI77_DANRE	Periaxin OS=Danio rerio OX=7955 GN=prx PE=4 SV=1			0	91.25	LDISLPK				-0.000365648	784.469	393.242	784.469	393.242	2	9	1.1.1.3011.3	26.2942	322.5	287.8	26.11	1.56	2433.53
1	194.25	194.25	79.32	49.37	47.18	tr|A0A2R8QI77|A0A2R8QI77_DANRE	Periaxin OS=Danio rerio OX=7955 GN=prx PE=4 SV=1			0	90.64	LDISLPK				-0.000365648	784.469	393.242	784.469	393.242	2	8	1.1.1.3017.2	26.6392	322.5	201.01	26.11	1.56	2217.68
1	194.25	194.25	79.32	49.37	47.18	tr|A0A2R8QI77|A0A2R8QI77_DANRE	Periaxin OS=Danio rerio OX=7955 GN=prx PE=4 SV=1			0	89.45	LDISLPK				-0.00119443	784.468	393.241	784.469	393.242	2	8	2.1.1.3000.3	24.5314	255.25	196.64	24.76	1.27	2498.62
1	194.25	194.25	79.32	49.37	47.18	tr|A0A2R8QI77|A0A2R8QI77_DANRE	Periaxin OS=Danio rerio OX=7955 GN=prx PE=4 SV=1			0	88.03	LDISLPK				-0.000339938	784.469	393.242	784.469	393.242	2	7	2.1.1.3013.4	25.2827	218.36	209.68	25.16	1.38	2190.78
1	194.25	194.25	79.32	49.37	47.18	tr|A0A2R8QI77|A0A2R8QI77_DANRE	Periaxin OS=Danio rerio OX=7955 GN=prx PE=4 SV=1			0	72.06	LDISLPK				-0.00719032	784.462	393.238	784.469	393.242	2	5	1.1.1.3108.2	31.9018	58.74	55.58	31.84	0.75	843.455
1	194.25	194.25	79.32	49.37	47.18	tr|A0A2R8QI77|A0A2R8QI77_DANRE	Periaxin OS=Danio rerio OX=7955 GN=prx PE=4 SV=1			0	49.65	LDISLPK				-0.00119443	784.468	393.241	784.469	393.242	2	8	2.1.1.3003.3	24.7044	255.25	248.63	24.76	1.27	2616.61
1	194.25	194.25	79.32	49.37	47.18	tr|A0A2R8QI77|A0A2R8QI77_DANRE	Periaxin OS=Danio rerio OX=7955 GN=prx PE=4 SV=1			0	48.34	LDISLPK				-0.00119443	784.468	393.241	784.469	393.242	2	6	2.1.1.3010.3	25.108	255.25	202.75	24.76	1.27	2381.94
1	194.25	194.25	79.32	49.37	47.18	tr|A0A2R8QI77|A0A2R8QI77_DANRE	Periaxin OS=Danio rerio OX=7955 GN=prx PE=4 SV=1			0	39.21	LDISLPK				-0.0151362	784.454	393.234	784.469	393.242	2	7	1.1.1.2933.4	21.7933	320.45	310.7	21.79	1.67	4585.69
1	194.25	194.25	79.32	49.37	47.18	tr|A0A2R8QI77|A0A2R8QI77_DANRE	Periaxin OS=Danio rerio OX=7955 GN=prx PE=4 SV=1			0	99	LDVSLPK			cleaved H-L@N-term	0.00430279	770.458	386.236	770.454	386.234	2	11	1.1.1.2923.2	21.2125	8230.17	3677.38	21.5	0.64	28737.7
1	194.25	194.25	79.32	49.37	47.18	tr|A0A2R8QI77|A0A2R8QI77_DANRE	Periaxin OS=Danio rerio OX=7955 GN=prx PE=4 SV=1			0	99	LDVSLPK			cleaved H-L@N-term	0.00430279	770.458	386.236	770.454	386.234	2	11	1.1.1.2925.3	21.3299	8230.17	6146.04	21.5	0.64	52459.8
1	194.25	194.25	79.32	49.37	47.18	tr|A0A2R8QI77|A0A2R8QI77_DANRE	Periaxin OS=Danio rerio OX=7955 GN=prx PE=4 SV=1			0	99	LDVSLPK			cleaved H-L@N-term	0.00430279	770.458	386.236	770.454	386.234	2	11	1.1.1.2927.2	21.4435	8230.17	7898.48	21.5	0.64	59578.7
1	194.25	194.25	79.32	49.37	47.18	tr|A0A2R8QI77|A0A2R8QI77_DANRE	Periaxin OS=Danio rerio OX=7955 GN=prx PE=4 SV=1			0	99	LDVSLPK			cleaved H-L@N-term	0.00430279	770.458	386.236	770.454	386.234	2	11	1.1.1.2931.3	21.6761	8230.17	6224.42	21.5	0.64	48681.6
1	194.25	194.25	79.32	49.37	47.18	tr|A0A2R8QI77|A0A2R8QI77_DANRE	Periaxin OS=Danio rerio OX=7955 GN=prx PE=4 SV=1			0	99	LDVSLPK			cleaved H-L@N-term	0.00430279	770.458	386.236	770.454	386.234	2	11	1.1.1.2933.2	21.79	8230.17	4693.6	21.5	0.64	37891.7
1	194.25	194.25	79.32	49.37	47.18	tr|A0A2R8QI77|A0A2R8QI77_DANRE	Periaxin OS=Danio rerio OX=7955 GN=prx PE=4 SV=1			0	99	LDVSLPK			cleaved H-L@N-term	0.00430279	770.458	386.236	770.454	386.234	2	11	1.1.1.2935.3	21.9072	8230.17	3607.67	21.5	0.64	31111.7
1	194.25	194.25	79.32	49.37	47.18	tr|A0A2R8QI77|A0A2R8QI77_DANRE	Periaxin OS=Danio rerio OX=7955 GN=prx PE=4 SV=1			0	99	LDVSLPK			cleaved H-L@N-term	0.00430279	770.458	386.236	770.454	386.234	2	11	1.1.1.2937.3	22.0226	8230.17	2991.01	21.5	0.64	24144.4
1	194.25	194.25	79.32	49.37	47.18	tr|A0A2R8QI77|A0A2R8QI77_DANRE	Periaxin OS=Danio rerio OX=7955 GN=prx PE=4 SV=1			0	99	LDVSLPK			cleaved H-L@N-term	0.00430279	770.458	386.236	770.454	386.234	2	11	1.1.1.2939.3	22.1381	8230.17	2582.37	21.5	0.64	23355.5
1	194.25	194.25	79.32	49.37	47.18	tr|A0A2R8QI77|A0A2R8QI77_DANRE	Periaxin OS=Danio rerio OX=7955 GN=prx PE=4 SV=1			0	99	LDVSLPK			cleaved H-L@N-term	0.00430279	770.458	386.236	770.454	386.234	2	11	1.1.1.2941.3	22.2535	8230.17	2215.55	21.5	0.64	19185.1
1	194.25	194.25	79.32	49.37	47.18	tr|A0A2R8QI77|A0A2R8QI77_DANRE	Periaxin OS=Danio rerio OX=7955 GN=prx PE=4 SV=1			0	99	LDVSLPK			cleaved H-L@N-term	0.00430279	770.458	386.236	770.454	386.234	2	11	1.1.1.2943.5	22.3723	8230.17	1988.74	21.5	0.64	17648.1
1	194.25	194.25	79.32	49.37	47.18	tr|A0A2R8QI77|A0A2R8QI77_DANRE	Periaxin OS=Danio rerio OX=7955 GN=prx PE=4 SV=1			0	99	LDVSLPK			cleaved H-L@N-term	0.00430279	770.458	386.236	770.454	386.234	2	11	1.1.1.2945.4	22.4859	8230.17	1882.47	21.5	0.64	14603.2
1	194.25	194.25	79.32	49.37	47.18	tr|A0A2R8QI77|A0A2R8QI77_DANRE	Periaxin OS=Danio rerio OX=7955 GN=prx PE=4 SV=1			0	99	LDVSLPK			cleaved H-L@N-term	0.00430279	770.458	386.236	770.454	386.234	2	10	1.1.1.2947.3	22.5996	8230.17	1768.23	21.5	0.64	14463.7
1	194.25	194.25	79.32	49.37	47.18	tr|A0A2R8QI77|A0A2R8QI77_DANRE	Periaxin OS=Danio rerio OX=7955 GN=prx PE=4 SV=1			0	99	LDVSLPK			cleaved H-L@N-term	0.00430279	770.458	386.236	770.454	386.234	2	11	1.1.1.2949.3	22.7151	8230.17	1554.05	21.5	0.64	13036.3
1	194.25	194.25	79.32	49.37	47.18	tr|A0A2R8QI77|A0A2R8QI77_DANRE	Periaxin OS=Danio rerio OX=7955 GN=prx PE=4 SV=1			0	99	LDVSLPK			cleaved H-L@N-term	0.00430279	770.458	386.236	770.454	386.234	2	11	1.1.1.2951.2	22.8287	8230.17	1418.22	21.5	0.64	12156.4
1	194.25	194.25	79.32	49.37	47.18	tr|A0A2R8QI77|A0A2R8QI77_DANRE	Periaxin OS=Danio rerio OX=7955 GN=prx PE=4 SV=1			0	99	LDVSLPK			cleaved H-L@N-term	0.00430279	770.458	386.236	770.454	386.234	2	11	1.1.1.2953.3	22.9457	8230.17	1236.59	21.5	0.64	9996.19
1	194.25	194.25	79.32	49.37	47.18	tr|A0A2R8QI77|A0A2R8QI77_DANRE	Periaxin OS=Danio rerio OX=7955 GN=prx PE=4 SV=1			0	99	LDVSLPK			cleaved H-L@N-term	0.00430279	770.458	386.236	770.454	386.234	2	10	1.1.1.2955.4	23.0627	8230.17	1205.46	21.5	0.64	10123.2
1	194.25	194.25	79.32	49.37	47.18	tr|A0A2R8QI77|A0A2R8QI77_DANRE	Periaxin OS=Danio rerio OX=7955 GN=prx PE=4 SV=1			0	99	LDVSLPK			cleaved H-L@N-term	0.00430279	770.458	386.236	770.454	386.234	2	11	1.1.1.2957.2	23.1749	8230.17	1168.05	21.5	0.64	9910.21
1	194.25	194.25	79.32	49.37	47.18	tr|A0A2R8QI77|A0A2R8QI77_DANRE	Periaxin OS=Danio rerio OX=7955 GN=prx PE=4 SV=1			0	99	LDVSLPK			cleaved H-L@N-term	0.00430279	770.458	386.236	770.454	386.234	2	11	1.1.1.2959.2	23.2902	8230.17	1099.94	21.5	0.64	8672.66
1	194.25	194.25	79.32	49.37	47.18	tr|A0A2R8QI77|A0A2R8QI77_DANRE	Periaxin OS=Danio rerio OX=7955 GN=prx PE=4 SV=1			0	99	LDVSLPK			cleaved H-L@N-term	0.00430279	770.458	386.236	770.454	386.234	2	10	1.1.1.2961.2	23.4055	8230.17	1038.09	21.5	0.64	7480.21
1	194.25	194.25	79.32	49.37	47.18	tr|A0A2R8QI77|A0A2R8QI77_DANRE	Periaxin OS=Danio rerio OX=7955 GN=prx PE=4 SV=1			0	99	LDVSLPK			cleaved H-L@N-term	0.00430279	770.458	386.236	770.454	386.234	2	11	1.1.1.2963.4	23.5244	8230.17	938.34	21.5	0.64	7996.71
1	194.25	194.25	79.32	49.37	47.18	tr|A0A2R8QI77|A0A2R8QI77_DANRE	Periaxin OS=Danio rerio OX=7955 GN=prx PE=4 SV=1			0	99	LDVSLPK			cleaved H-L@N-term	0.00430279	770.458	386.236	770.454	386.234	2	10	1.1.1.2965.2	23.6364	8230.17	889.26	21.5	0.64	7664.06
1	194.25	194.25	79.32	49.37	47.18	tr|A0A2R8QI77|A0A2R8QI77_DANRE	Periaxin OS=Danio rerio OX=7955 GN=prx PE=4 SV=1			0	99	LDVSLPK			cleaved H-L@N-term	0.00149518	770.455	386.235	770.454	386.234	2	11	1.1.1.2975.2	24.2142	745.09	707.78	24.27	0.4	5314.64
1	194.25	194.25	79.32	49.37	47.18	tr|A0A2R8QI77|A0A2R8QI77_DANRE	Periaxin OS=Danio rerio OX=7955 GN=prx PE=4 SV=1			0	99	LDVSLPK			cleaved H-L@N-term	-0.00061925	770.453	386.234	770.454	386.234	2	11	2.1.1.2947.4	21.4766	702.8	588.85	21.64	0.98	6612.08
1	194.25	194.25	79.32	49.37	47.18	tr|A0A2R8QI77|A0A2R8QI77_DANRE	Periaxin OS=Danio rerio OX=7955 GN=prx PE=4 SV=1			0	99	LDVSLPK			cleaved H-L@N-term	-0.00061925	770.453	386.234	770.454	386.234	2	10	2.1.1.2949.4	21.5919	702.8	702.65	21.64	0.98	7825.93
1	194.25	194.25	79.32	49.37	47.18	tr|A0A2R8QI77|A0A2R8QI77_DANRE	Periaxin OS=Danio rerio OX=7955 GN=prx PE=4 SV=1			0	99	LDVSLPK			cleaved H-L@N-term	-0.00061925	770.453	386.234	770.454	386.234	2	10	2.1.1.2951.4	21.7072	702.8	668.44	21.64	0.98	7930.51
1	194.25	194.25	79.32	49.37	47.18	tr|A0A2R8QI77|A0A2R8QI77_DANRE	Periaxin OS=Danio rerio OX=7955 GN=prx PE=4 SV=1			0	99	LDVSLPK			cleaved H-L@N-term	-0.00061925	770.453	386.234	770.454	386.234	2	11	2.1.1.2953.4	21.8226	702.8	622.46	21.64	0.98	6354.44
1	194.25	194.25	79.32	49.37	47.18	tr|A0A2R8QI77|A0A2R8QI77_DANRE	Periaxin OS=Danio rerio OX=7955 GN=prx PE=4 SV=1			0	99	LDVSLPK			cleaved H-L@N-term	-0.00061925	770.453	386.234	770.454	386.234	2	11	2.1.1.2955.4	21.9383	702.8	535.37	21.64	0.98	5590.29
1	194.25	194.25	79.32	49.37	47.18	tr|A0A2R8QI77|A0A2R8QI77_DANRE	Periaxin OS=Danio rerio OX=7955 GN=prx PE=4 SV=1			0	99	LDVSLPK			cleaved H-L@N-term	0.00430279	770.458	386.236	770.454	386.234	2	11	1.1.1.2929.2	21.559	8230.17	7799.16	21.5	0.64	59757.3
1	194.25	194.25	79.32	49.37	47.18	tr|A0A2R8QI77|A0A2R8QI77_DANRE	Periaxin OS=Danio rerio OX=7955 GN=prx PE=4 SV=1			0	99	LDVSLPK			cleaved H-L@N-term	0.00149518	770.455	386.235	770.454	386.234	2	10	1.1.1.2973.2	24.0987	745.09	654.28	24.27	0.4	6483.11
1	194.25	194.25	79.32	49.37	47.18	tr|A0A2R8QI77|A0A2R8QI77_DANRE	Periaxin OS=Danio rerio OX=7955 GN=prx PE=4 SV=1			0	99	LDVSLPK			cleaved H-L@N-term	-0.00061925	770.453	386.234	770.454	386.234	2	9	2.1.1.2957.3	22.0521	702.8	448.22	21.64	0.98	5145.28
1	194.25	194.25	79.32	49.37	47.18	tr|A0A2R8QI77|A0A2R8QI77_DANRE	Periaxin OS=Danio rerio OX=7955 GN=prx PE=4 SV=1			0	99	LDVSLPK			cleaved H-L@N-term	-0.00061925	770.453	386.234	770.454	386.234	2	9	2.1.1.2967.4	22.6305	702.8	253.15	21.64	0.98	3282.06
1	194.25	194.25	79.32	49.37	47.18	tr|A0A2R8QI77|A0A2R8QI77_DANRE	Periaxin OS=Danio rerio OX=7955 GN=prx PE=4 SV=1			0	99	LDVSLPK			cleaved H-L@N-term	0.00430279	770.458	386.236	770.454	386.234	2	11	1.1.1.2921.5	21.102	8230.17	1865.05	21.5	0.64	15945
1	194.25	194.25	79.32	49.37	47.18	tr|A0A2R8QI77|A0A2R8QI77_DANRE	Periaxin OS=Danio rerio OX=7955 GN=prx PE=4 SV=1			0	99	LDVSLPK			cleaved H-L@N-term	-0.00061925	770.453	386.234	770.454	386.234	2	9	2.1.1.2964.4	22.4576	702.8	273.28	21.64	0.98	3782.56
1	194.25	194.25	79.32	49.37	47.18	tr|A0A2R8QI77|A0A2R8QI77_DANRE	Periaxin OS=Danio rerio OX=7955 GN=prx PE=4 SV=1			0	99	LDVSLPK			cleaved H-L@N-term	-0.00061925	770.453	386.234	770.454	386.234	2	10	2.1.1.2945.4	21.3611	702.8	373.76	21.64	0.98	4888.43
1	194.25	194.25	79.32	49.37	47.18	tr|A0A2R8QI77|A0A2R8QI77_DANRE	Periaxin OS=Danio rerio OX=7955 GN=prx PE=4 SV=1			0	99	LDVSLPK			cleaved H-L@N-term	-0.00061925	770.453	386.234	770.454	386.234	2	9	2.1.1.2961.3	22.283	702.8	370.54	21.64	0.98	3845.24
1	194.25	194.25	79.32	49.37	47.18	tr|A0A2R8QI77|A0A2R8QI77_DANRE	Periaxin OS=Danio rerio OX=7955 GN=prx PE=4 SV=1			0	99	LDVSLPK			cleaved H-L@N-term	-0.00061925	770.453	386.234	770.454	386.234	2	9	2.1.1.2959.3	22.1676	702.8	381.21	21.64	0.98	4643.32
1	194.25	194.25	79.32	49.37	47.18	tr|A0A2R8QI77|A0A2R8QI77_DANRE	Periaxin OS=Danio rerio OX=7955 GN=prx PE=4 SV=1			0	99	LDVSLPK			cleaved H-L@N-term	-0.00061925	770.453	386.234	770.454	386.234	2	8	2.1.1.2970.3	22.8017	702.8	208.49	21.64	0.98	2994.72
1	194.25	194.25	79.32	49.37	47.18	tr|A0A2R8QI77|A0A2R8QI77_DANRE	Periaxin OS=Danio rerio OX=7955 GN=prx PE=4 SV=1			0	67.6	LDVSLPK			cleaved H-L@N-term	-0.0132535	770.44	386.228	770.454	386.234	2	7	2.1.1.2866.4	16.8203	102.5	92.4	16.86	1.26	2548.82
1	194.25	194.25	79.32	49.37	47.18	tr|A0A2R8QI77|A0A2R8QI77_DANRE	Periaxin OS=Danio rerio OX=7955 GN=prx PE=4 SV=1			0	99	LEFFSPYSK				-0.000161436	1116.55	559.282	1116.55	559.282	2	9	1.1.1.3055.13	28.8532	569.72	554.34	28.77	1.5	2026.51
1	194.25	194.25	79.32	49.37	47.18	tr|A0A2R8QI77|A0A2R8QI77_DANRE	Periaxin OS=Danio rerio OX=7955 GN=prx PE=4 SV=1			0	99	LEFFSPYSK				-0.000161436	1116.55	559.282	1116.55	559.282	2	9	1.1.1.3060.14	29.1435	569.72	377.51	28.77	1.5	1661.39
1	194.25	194.25	79.32	49.37	47.18	tr|A0A2R8QI77|A0A2R8QI77_DANRE	Periaxin OS=Danio rerio OX=7955 GN=prx PE=4 SV=1			0	99	LEFFSPYSK				-0.000161436	1116.55	559.282	1116.55	559.282	2	8	1.1.1.3053.14	28.7392	569.72	534.85	28.77	1.5	1914.14
1	194.25	194.25	79.32	49.37	47.18	tr|A0A2R8QI77|A0A2R8QI77_DANRE	Periaxin OS=Danio rerio OX=7955 GN=prx PE=4 SV=1			0	99	LEFFSPYSK				-0.000161436	1116.55	559.282	1116.55	559.282	2	8	1.1.1.3066.11	29.4853	569.72	302.86	28.77	1.5	1395.94
1	194.25	194.25	79.32	49.37	47.18	tr|A0A2R8QI77|A0A2R8QI77_DANRE	Periaxin OS=Danio rerio OX=7955 GN=prx PE=4 SV=1			0	99	LEFFSPYSK				-0.000161436	1116.55	559.282	1116.55	559.282	2	9	1.1.1.3069.11	29.6588	569.72	252.2	28.77	1.5	1434.63
1	194.25	194.25	79.32	49.37	47.18	tr|A0A2R8QI77|A0A2R8QI77_DANRE	Periaxin OS=Danio rerio OX=7955 GN=prx PE=4 SV=1			0	86.37	LEFFSPYSK				-0.000161436	1116.55	559.282	1116.55	559.282	2	7	1.1.1.3051.14	28.6237	569.72	413.71	28.77	1.5	1461.13
1	194.25	194.25	79.32	49.37	47.18	tr|A0A2R8QI77|A0A2R8QI77_DANRE	Periaxin OS=Danio rerio OX=7955 GN=prx PE=4 SV=1			0	70.49	LEFFSPYSK				-0.00235871	1116.55	559.281	1116.55	559.282	2	7	1.1.1.3075.12	30.0074	238.08	197.98	30.1	0.52	1457.23
1	194.25	194.25	79.32	49.37	47.18	tr|A0A2R8QI77|A0A2R8QI77_DANRE	Periaxin OS=Danio rerio OX=7955 GN=prx PE=4 SV=1			0	56.86	LEFFSPYSK				0.0120456	1116.56	559.288	1116.55	559.282	2	7	1.1.1.3092.14	30.995	329.57	308.67	30.8	2.09	2244.07
1	194.25	194.25	79.32	49.37	47.18	tr|A0A2R8QI77|A0A2R8QI77_DANRE	Periaxin OS=Danio rerio OX=7955 GN=prx PE=4 SV=1			0	38.43	LEFFSPYSK				0.0120456	1116.56	559.288	1116.55	559.282	2	6	1.1.1.3097.10	31.2763	329.57	245.96	30.8	2.09	1914.35
1	194.25	194.25	79.32	49.37	47.18	tr|A0A2R8QI77|A0A2R8QI77_DANRE	Periaxin OS=Danio rerio OX=7955 GN=prx PE=4 SV=1			0	25.7	LEFFSPYSK				0.0120456	1116.56	559.288	1116.55	559.282	2	7	1.1.1.3087.10	30.698	329.57	284.4	30.8	2.09	2401.55
1	194.25	194.25	79.32	49.37	47.18	tr|A0A2R8QI77|A0A2R8QI77_DANRE	Periaxin OS=Danio rerio OX=7955 GN=prx PE=4 SV=1			0	99	LKPAGGEINIEGPDIESGK				-0.0011328	1922.99	642.005	1922.99	642.006	3	14	1.1.1.2967.25	23.79	1219.9	438.36	24.04	0.52	2057
1	194.25	194.25	79.32	49.37	47.18	tr|A0A2R8QI77|A0A2R8QI77_DANRE	Periaxin OS=Danio rerio OX=7955 GN=prx PE=4 SV=1			0	99	LKPAGGEINIEGPDIESGK				-0.0011328	1922.99	642.005	1922.99	642.006	3	19	1.1.1.2971.27	24.0248	1219.9	1187.04	24.04	0.52	4038.6
1	194.25	194.25	79.32	49.37	47.18	tr|A0A2R8QI77|A0A2R8QI77_DANRE	Periaxin OS=Danio rerio OX=7955 GN=prx PE=4 SV=1			0	99	LKPAGGEINIEGPDIESGK				-0.0011328	1922.99	642.005	1922.99	642.006	3	17	1.1.1.2973.26	24.1386	1219.9	1031.66	24.04	0.52	3533.82
1	194.25	194.25	79.32	49.37	47.18	tr|A0A2R8QI77|A0A2R8QI77_DANRE	Periaxin OS=Danio rerio OX=7955 GN=prx PE=4 SV=1			0	99	LKPAGGEINIEGPDIESGK				-0.0011328	1922.99	642.005	1922.99	642.006	3	17	1.1.1.2975.26	24.2541	1219.9	806.37	24.04	0.52	2933.04
1	194.25	194.25	79.32	49.37	47.18	tr|A0A2R8QI77|A0A2R8QI77_DANRE	Periaxin OS=Danio rerio OX=7955 GN=prx PE=4 SV=1			0	99	LKPAGGEINIEGPDIESGK				-0.0011328	1922.99	642.005	1922.99	642.006	3	16	1.1.1.2977.27	24.3713	1219.9	656.53	24.04	0.52	2409.74
1	194.25	194.25	79.32	49.37	47.18	tr|A0A2R8QI77|A0A2R8QI77_DANRE	Periaxin OS=Danio rerio OX=7955 GN=prx PE=4 SV=1			0	99	LKPAGGEINIEGPDIESGK				-0.0011328	1922.99	642.005	1922.99	642.006	3	15	1.1.1.2979.24	24.4818	1219.9	482.77	24.04	0.52	2485.02
1	194.25	194.25	79.32	49.37	47.18	tr|A0A2R8QI77|A0A2R8QI77_DANRE	Periaxin OS=Danio rerio OX=7955 GN=prx PE=4 SV=1			0	99	LKPAGGEINIEGPDIESGK				-0.0011328	1922.99	642.005	1922.99	642.006	3	11	1.1.1.2992.23	25.2309	1219.9	228.44	24.04	0.52	1713.08
1	194.25	194.25	79.32	49.37	47.18	tr|A0A2R8QI77|A0A2R8QI77_DANRE	Periaxin OS=Danio rerio OX=7955 GN=prx PE=4 SV=1			0	98.24	LKPAGGEINIEGPDIESGK				-0.00864013	1922.99	642.003	1922.99	642.006	3	9	1.1.1.2996.26	25.4667	216.18	203.59	25.54	0.58	1267.97
1	194.25	194.25	79.32	49.37	47.18	tr|A0A2R8QI77|A0A2R8QI77_DANRE	Periaxin OS=Danio rerio OX=7955 GN=prx PE=4 SV=1			0	95.24	LKPAGGEINIEGPDIESGK				-0.00864013	1922.99	642.003	1922.99	642.006	3	8	1.1.1.3004.25	25.9267	216.18	159.46	25.54	0.58	1329.66
1	194.25	194.25	79.32	49.37	47.18	tr|A0A2R8QI77|A0A2R8QI77_DANRE	Periaxin OS=Danio rerio OX=7955 GN=prx PE=4 SV=1			0	99	LKPSEAEVNIEGPDIK				0.00148021	1737.92	580.313	1737.91	580.312	3	18	1.1.1.2948.24	22.6923	862.24	706.96	22.82	0.63	3197.97
1	194.25	194.25	79.32	49.37	47.18	tr|A0A2R8QI77|A0A2R8QI77_DANRE	Periaxin OS=Danio rerio OX=7955 GN=prx PE=4 SV=1			0	99	LKPSEAEVNIEGPDIK				0.00148021	1737.92	580.313	1737.91	580.312	3	19	1.1.1.2950.26	22.8111	862.24	855.21	22.82	0.63	3405.34
1	194.25	194.25	79.32	49.37	47.18	tr|A0A2R8QI77|A0A2R8QI77_DANRE	Periaxin OS=Danio rerio OX=7955 GN=prx PE=4 SV=1			0	99	LKPSEAEVNIEGPDIK				0.00148021	1737.92	580.313	1737.91	580.312	3	12	1.1.1.2954.23	23.0367	862.24	533.27	22.82	0.63	2412.95
1	194.25	194.25	79.32	49.37	47.18	tr|A0A2R8QI77|A0A2R8QI77_DANRE	Periaxin OS=Danio rerio OX=7955 GN=prx PE=4 SV=1			0	99	LKPSEAEVNIEGPDIK				0.00148021	1737.92	580.313	1737.91	580.312	3	12	1.1.1.2965.24	23.673	862.24	208.89	22.82	0.63	1883.34
1	194.25	194.25	79.32	49.37	47.18	tr|A0A2R8QI77|A0A2R8QI77_DANRE	Periaxin OS=Danio rerio OX=7955 GN=prx PE=4 SV=1			0	99	LKPSEAEVNIEGPDIK				0.000303973	1737.92	580.312	1737.91	580.312	3	13	2.1.1.2970.23	22.835	270.42	265.48	22.85	1.09	2899.27
1	194.25	194.25	79.32	49.37	47.18	tr|A0A2R8QI77|A0A2R8QI77_DANRE	Periaxin OS=Danio rerio OX=7955 GN=prx PE=4 SV=1			0	99	LKPSEAEVNIEGPDIK				0.00148021	1737.92	580.313	1737.91	580.312	3	10	1.1.1.2960.21	23.3795	862.24	299.52	22.82	0.63	1822.57
1	194.25	194.25	79.32	49.37	47.18	tr|A0A2R8QI77|A0A2R8QI77_DANRE	Periaxin OS=Danio rerio OX=7955 GN=prx PE=4 SV=1			0	98.61	LKPSEAEVNIEGPDIK				0.000303973	1737.92	580.312	1737.91	580.312	3	10	2.1.1.2968.24	22.7215	270.42	220.58	22.85	1.09	2286.38
1	194.25	194.25	79.32	49.37	47.18	tr|A0A2R8QI77|A0A2R8QI77_DANRE	Periaxin OS=Danio rerio OX=7955 GN=prx PE=4 SV=1			0	82.24	LKPSEAEVNIEGPDIK				0.00148021	1737.92	580.313	1737.91	580.312	3	9	1.1.1.2953.23	22.9791	862.24	623.95	22.82	0.63	1867.45
1	194.25	194.25	79.32	49.37	47.18	tr|A0A2R8QI77|A0A2R8QI77_DANRE	Periaxin OS=Danio rerio OX=7955 GN=prx PE=4 SV=1			0	77.25	LKPSEAEVNIEGPDIK				-0.000350848	1737.91	580.312	1737.91	580.312	3	7	1.1.1.2976.22	24.3051	233.77	232.33	24.27	0.4	1567.61
1	194.25	194.25	79.32	49.37	47.18	tr|A0A2R8QI77|A0A2R8QI77_DANRE	Periaxin OS=Danio rerio OX=7955 GN=prx PE=4 SV=1			0	72.98	LKPSEAEVNIEGPDIK				0.00148021	1737.92	580.313	1737.91	580.312	3	9	1.1.1.2947.23	22.6329	862.24	555.03	22.82	0.63	2008.42
1	194.25	194.25	79.32	49.37	47.18	tr|A0A2R8QI77|A0A2R8QI77_DANRE	Periaxin OS=Danio rerio OX=7955 GN=prx PE=4 SV=1			0	99	LKPSGGEINIEGPDIESGK				-0.00307416	1938.99	647.336	1938.99	647.337	3	16	1.1.1.2956.26	23.1572	1883.37	574.15	23.4	0.52	2280.38
1	194.25	194.25	79.32	49.37	47.18	tr|A0A2R8QI77|A0A2R8QI77_DANRE	Periaxin OS=Danio rerio OX=7955 GN=prx PE=4 SV=1			0	99	LKPSGGEINIEGPDIESGK				-0.00307416	1938.99	647.336	1938.99	647.337	3	19	1.1.1.2958.26	23.2725	1883.37	1255.05	23.4	0.52	4457.33
1	194.25	194.25	79.32	49.37	47.18	tr|A0A2R8QI77|A0A2R8QI77_DANRE	Periaxin OS=Danio rerio OX=7955 GN=prx PE=4 SV=1			0	99	LKPSGGEINIEGPDIESGK				-0.00307416	1938.99	647.336	1938.99	647.337	3	20	1.1.1.2960.27	23.3895	1883.37	1846.01	23.4	0.52	5835.14
1	194.25	194.25	79.32	49.37	47.18	tr|A0A2R8QI77|A0A2R8QI77_DANRE	Periaxin OS=Danio rerio OX=7955 GN=prx PE=4 SV=1			0	99	LKPSGGEINIEGPDIESGK				-0.00307416	1938.99	647.336	1938.99	647.337	3	19	1.1.1.2962.27	23.505	1883.37	1731.97	23.4	0.52	5599.19
1	194.25	194.25	79.32	49.37	47.18	tr|A0A2R8QI77|A0A2R8QI77_DANRE	Periaxin OS=Danio rerio OX=7955 GN=prx PE=4 SV=1			0	99	LKPSGGEINIEGPDIESGK				-0.00307416	1938.99	647.336	1938.99	647.337	3	18	1.1.1.2964.29	23.6237	1883.37	1286.77	23.4	0.52	4273.7
1	194.25	194.25	79.32	49.37	47.18	tr|A0A2R8QI77|A0A2R8QI77_DANRE	Periaxin OS=Danio rerio OX=7955 GN=prx PE=4 SV=1			0	99	LKPSGGEINIEGPDIESGK				-0.00307416	1938.99	647.336	1938.99	647.337	3	15	1.1.1.2966.25	23.7323	1883.37	945.84	23.4	0.52	3390.74
1	194.25	194.25	79.32	49.37	47.18	tr|A0A2R8QI77|A0A2R8QI77_DANRE	Periaxin OS=Danio rerio OX=7955 GN=prx PE=4 SV=1			0	99	LKPSGGEINIEGPDIESGK				-0.00307416	1938.99	647.336	1938.99	647.337	3	17	1.1.1.2968.28	23.8528	1883.37	769.13	23.4	0.52	3294.06
1	194.25	194.25	79.32	49.37	47.18	tr|A0A2R8QI77|A0A2R8QI77_DANRE	Periaxin OS=Danio rerio OX=7955 GN=prx PE=4 SV=1			0	99	LKPSGGEINIEGPDIESGK				-0.00307416	1938.99	647.336	1938.99	647.337	3	14	1.1.1.2970.26	23.9652	1883.37	646.61	23.4	0.52	2872.24
1	194.25	194.25	79.32	49.37	47.18	tr|A0A2R8QI77|A0A2R8QI77_DANRE	Periaxin OS=Danio rerio OX=7955 GN=prx PE=4 SV=1			0	99	LKPSGGEINIEGPDIESGK				-0.00307416	1938.99	647.336	1938.99	647.337	3	14	1.1.1.2972.22	24.0743	1883.37	563.49	23.4	0.52	2794.46
1	194.25	194.25	79.32	49.37	47.18	tr|A0A2R8QI77|A0A2R8QI77_DANRE	Periaxin OS=Danio rerio OX=7955 GN=prx PE=4 SV=1			0	99	LKPSGGEINIEGPDIESGK	Deamidated(N)@9			0.0143136	1939.99	647.67	1939.97	647.665	3	14	1.1.1.2973.27	24.1403	1060.11	308.74	23.46	0.63	2496.32
1	194.25	194.25	79.32	49.37	47.18	tr|A0A2R8QI77|A0A2R8QI77_DANRE	Periaxin OS=Danio rerio OX=7955 GN=prx PE=4 SV=1			0	99	LKPSGGEINIEGPDIESGK				-0.00307416	1938.99	647.336	1938.99	647.337	3	15	1.1.1.2974.28	24.1996	1883.37	480.61	23.4	0.52	2230.57
1	194.25	194.25	79.32	49.37	47.18	tr|A0A2R8QI77|A0A2R8QI77_DANRE	Periaxin OS=Danio rerio OX=7955 GN=prx PE=4 SV=1			0	99	LKPSGGEINIEGPDIESGK				-0.00307416	1938.99	647.336	1938.99	647.337	3	17	1.1.1.2978.26	24.4273	1883.37	361.74	23.4	0.52	2010.33
1	194.25	194.25	79.32	49.37	47.18	tr|A0A2R8QI77|A0A2R8QI77_DANRE	Periaxin OS=Danio rerio OX=7955 GN=prx PE=4 SV=1			0	99	LKPSGGEINIEGPDIESGK				-0.00307416	1938.99	647.336	1938.99	647.337	3	16	1.1.1.2980.25	24.5413	1883.37	388.5	23.4	0.52	2054.81
1	194.25	194.25	79.32	49.37	47.18	tr|A0A2R8QI77|A0A2R8QI77_DANRE	Periaxin OS=Danio rerio OX=7955 GN=prx PE=4 SV=1			0	99	LKPSGGEINIEGPDIESGK				-0.00307416	1938.99	647.336	1938.99	647.337	3	14	1.1.1.2982.28	24.6618	1883.37	360.79	23.4	0.52	1974.82
1	194.25	194.25	79.32	49.37	47.18	tr|A0A2R8QI77|A0A2R8QI77_DANRE	Periaxin OS=Danio rerio OX=7955 GN=prx PE=4 SV=1			0	99	LKPSGGEINIEGPDIESGK				-0.00307416	1938.99	647.336	1938.99	647.337	3	12	1.1.1.2987.25	24.9456	1883.37	287.71	23.4	0.52	1639.9
1	194.25	194.25	79.32	49.37	47.18	tr|A0A2R8QI77|A0A2R8QI77_DANRE	Periaxin OS=Danio rerio OX=7955 GN=prx PE=4 SV=1			0	99	LKPSGGEINIEGPDIESGK				-0.00307416	1938.99	647.336	1938.99	647.337	3	13	1.1.1.2989.23	25.0577	1883.37	286.52	23.4	0.52	1714.28
1	194.25	194.25	79.32	49.37	47.18	tr|A0A2R8QI77|A0A2R8QI77_DANRE	Periaxin OS=Danio rerio OX=7955 GN=prx PE=4 SV=1			0	99	LKPSGGEINIEGPDIESGK				0.00809527	1939	647.34	1938.99	647.337	3	10	1.1.1.3009.26	26.217	209.34	158.88	25.88	0.75	1519.63
1	194.25	194.25	79.32	49.37	47.18	tr|A0A2R8QI77|A0A2R8QI77_DANRE	Periaxin OS=Danio rerio OX=7955 GN=prx PE=4 SV=1			0	91.1	LKPSGGEINIEGPDIESGK				0.00809527	1939	647.34	1938.99	647.337	3	8	1.1.1.3005.25	25.9843	209.34	187.85	25.88	0.75	1572.42
1	194.25	194.25	79.32	49.37	47.18	tr|A0A2R8QI77|A0A2R8QI77_DANRE	Periaxin OS=Danio rerio OX=7955 GN=prx PE=4 SV=1			0	86.45	LKPSGGEINIEGPDIESGK				0.00809527	1939	647.34	1938.99	647.337	3	8	1.1.1.3007.26	26.1014	209.34	167.14	25.88	0.75	1570.81
1	194.25	194.25	79.32	49.37	47.18	tr|A0A2R8QI77|A0A2R8QI77_DANRE	Periaxin OS=Danio rerio OX=7955 GN=prx PE=4 SV=1			0	99	LKPSGGEINIEGPDIK				-0.0015281	1665.89	556.305	1665.89	556.305	3	14	1.1.1.2948.21	22.6872	2932.81	393.04	23.05	0.58	2366.99
1	194.25	194.25	79.32	49.37	47.18	tr|A0A2R8QI77|A0A2R8QI77_DANRE	Periaxin OS=Danio rerio OX=7955 GN=prx PE=4 SV=1			0	99	LKPSGGEINIEGPDIK				-0.0015281	1665.89	556.305	1665.89	556.305	3	16	1.1.1.2950.25	22.8094	2932.81	1295.21	23.05	0.58	4756.57
1	194.25	194.25	79.32	49.37	47.18	tr|A0A2R8QI77|A0A2R8QI77_DANRE	Periaxin OS=Danio rerio OX=7955 GN=prx PE=4 SV=1			0	99	LKPSGGEINIEGPDIK				-0.0015281	1665.89	556.305	1665.89	556.305	3	21	1.1.1.2952.24	22.9231	2932.81	2329.52	23.05	0.58	8494.1
1	194.25	194.25	79.32	49.37	47.18	tr|A0A2R8QI77|A0A2R8QI77_DANRE	Periaxin OS=Danio rerio OX=7955 GN=prx PE=4 SV=1			0	99	LKPSGGEINIEGPDIK				-0.0015281	1665.89	556.305	1665.89	556.305	3	22	1.1.1.2954.19	23.03	2932.81	2888.91	23.05	0.58	9581.8
1	194.25	194.25	79.32	49.37	47.18	tr|A0A2R8QI77|A0A2R8QI77_DANRE	Periaxin OS=Danio rerio OX=7955 GN=prx PE=4 SV=1			0	99	LKPSGGEINIEGPDIK				-0.0015281	1665.89	556.305	1665.89	556.305	3	18	1.1.1.2956.19	23.1456	2932.81	2615.8	23.05	0.58	8246.15
1	194.25	194.25	79.32	49.37	47.18	tr|A0A2R8QI77|A0A2R8QI77_DANRE	Periaxin OS=Danio rerio OX=7955 GN=prx PE=4 SV=1			0	99	LKPSGGEINIEGPDIK				-0.0015281	1665.89	556.305	1665.89	556.305	3	19	1.1.1.2958.19	23.2609	2932.81	1985.98	23.05	0.58	6102.88
1	194.25	194.25	79.32	49.37	47.18	tr|A0A2R8QI77|A0A2R8QI77_DANRE	Periaxin OS=Danio rerio OX=7955 GN=prx PE=4 SV=1			0	99	LKPSGGEINIEGPDIK				-0.0015281	1665.89	556.305	1665.89	556.305	3	17	1.1.1.2960.18	23.3745	2932.81	1500.02	23.05	0.58	4321.39
1	194.25	194.25	79.32	49.37	47.18	tr|A0A2R8QI77|A0A2R8QI77_DANRE	Periaxin OS=Danio rerio OX=7955 GN=prx PE=4 SV=1			0	99	LKPSGGEINIEGPDIK				-0.0015281	1665.89	556.305	1665.89	556.305	3	16	1.1.1.2962.22	23.4967	2932.81	1121.16	23.05	0.58	4215.77
1	194.25	194.25	79.32	49.37	47.18	tr|A0A2R8QI77|A0A2R8QI77_DANRE	Periaxin OS=Danio rerio OX=7955 GN=prx PE=4 SV=1			0	99	LKPSGGEINIEGPDIK				-0.0015281	1665.89	556.305	1665.89	556.305	3	15	1.1.1.2964.22	23.612	2932.81	894.07	23.05	0.58	3847.74
1	194.25	194.25	79.32	49.37	47.18	tr|A0A2R8QI77|A0A2R8QI77_DANRE	Periaxin OS=Danio rerio OX=7955 GN=prx PE=4 SV=1			0	99	LKPSGGEINIEGPDIK				-0.0015281	1665.89	556.305	1665.89	556.305	3	16	1.1.1.2966.16	23.7173	2932.81	795.32	23.05	0.58	3258.26
1	194.25	194.25	79.32	49.37	47.18	tr|A0A2R8QI77|A0A2R8QI77_DANRE	Periaxin OS=Danio rerio OX=7955 GN=prx PE=4 SV=1			0	99	LKPSGGEINIEGPDIK				-0.0015281	1665.89	556.305	1665.89	556.305	3	17	1.1.1.2968.22	23.8428	2932.81	699.32	23.05	0.58	3701.67
1	194.25	194.25	79.32	49.37	47.18	tr|A0A2R8QI77|A0A2R8QI77_DANRE	Periaxin OS=Danio rerio OX=7955 GN=prx PE=4 SV=1			0	99	LKPSGGEINIEGPDIK				-0.0015281	1665.89	556.305	1665.89	556.305	3	15	1.1.1.2970.18	23.9518	2932.81	613.65	23.05	0.58	3356.24
1	194.25	194.25	79.32	49.37	47.18	tr|A0A2R8QI77|A0A2R8QI77_DANRE	Periaxin OS=Danio rerio OX=7955 GN=prx PE=4 SV=1			0	99	LKPSGGEINIEGPDIK				-0.0015281	1665.89	556.305	1665.89	556.305	3	14	1.1.1.2972.18	24.0677	2932.81	580.75	23.05	0.58	2873.64
1	194.25	194.25	79.32	49.37	47.18	tr|A0A2R8QI77|A0A2R8QI77_DANRE	Periaxin OS=Danio rerio OX=7955 GN=prx PE=4 SV=1			0	99	LKPSGGEINIEGPDIK				-0.0015281	1665.89	556.305	1665.89	556.305	3	13	1.1.1.2974.20	24.1863	2932.81	519.9	23.05	0.58	2628.99
1	194.25	194.25	79.32	49.37	47.18	tr|A0A2R8QI77|A0A2R8QI77_DANRE	Periaxin OS=Danio rerio OX=7955 GN=prx PE=4 SV=1			0	99	LKPSGGEINIEGPDIK				-0.0015281	1665.89	556.305	1665.89	556.305	3	15	1.1.1.2977.18	24.3563	2932.81	487.03	23.05	0.58	2556.31
1	194.25	194.25	79.32	49.37	47.18	tr|A0A2R8QI77|A0A2R8QI77_DANRE	Periaxin OS=Danio rerio OX=7955 GN=prx PE=4 SV=1			0	99	LKPSGGEINIEGPDIK				-0.0015281	1665.89	556.305	1665.89	556.305	3	14	1.1.1.2979.20	24.4751	2932.81	395.07	23.05	0.58	2482.82
1	194.25	194.25	79.32	49.37	47.18	tr|A0A2R8QI77|A0A2R8QI77_DANRE	Periaxin OS=Danio rerio OX=7955 GN=prx PE=4 SV=1			0	99	LKPSGGEINIEGPDIK				-0.0015281	1665.89	556.305	1665.89	556.305	3	18	1.1.1.2981.21	24.5923	2932.81	392.13	23.05	0.58	2347.59
1	194.25	194.25	79.32	49.37	47.18	tr|A0A2R8QI77|A0A2R8QI77_DANRE	Periaxin OS=Danio rerio OX=7955 GN=prx PE=4 SV=1			0	99	LKPSGGEINIEGPDIK				-0.0015281	1665.89	556.305	1665.89	556.305	3	14	1.1.1.2983.18	24.703	2932.81	417.08	23.05	0.58	2337.46
1	194.25	194.25	79.32	49.37	47.18	tr|A0A2R8QI77|A0A2R8QI77_DANRE	Periaxin OS=Danio rerio OX=7955 GN=prx PE=4 SV=1			0	99	LKPSGGEINIEGPDIK				-0.0015281	1665.89	556.305	1665.89	556.305	3	11	1.1.1.2985.15	24.8134	2932.81	381.7	23.05	0.58	2346.46
1	194.25	194.25	79.32	49.37	47.18	tr|A0A2R8QI77|A0A2R8QI77_DANRE	Periaxin OS=Danio rerio OX=7955 GN=prx PE=4 SV=1			0	99	LKPSGGEINIEGPDIK				-0.0015281	1665.89	556.305	1665.89	556.305	3	12	1.1.1.2989.17	25.0478	2932.81	336.5	23.05	0.58	2103.39
1	194.25	194.25	79.32	49.37	47.18	tr|A0A2R8QI77|A0A2R8QI77_DANRE	Periaxin OS=Danio rerio OX=7955 GN=prx PE=4 SV=1			0	99	LKPSGGEINIEGPDIK				-0.0123313	1665.88	556.301	1665.89	556.305	3	13	1.1.1.2991.19	25.1666	291.11	288.44	25.25	0.4	2185.69
1	194.25	194.25	79.32	49.37	47.18	tr|A0A2R8QI77|A0A2R8QI77_DANRE	Periaxin OS=Danio rerio OX=7955 GN=prx PE=4 SV=1			0	99	LKPSGGEINIEGPDIK				-0.0123313	1665.88	556.301	1665.89	556.305	3	12	1.1.1.2993.17	25.2786	291.11	289.35	25.25	0.4	2079.6
1	194.25	194.25	79.32	49.37	47.18	tr|A0A2R8QI77|A0A2R8QI77_DANRE	Periaxin OS=Danio rerio OX=7955 GN=prx PE=4 SV=1			0	99	LKPSGGEINIEGPDIK				-0.0123313	1665.88	556.301	1665.89	556.305	3	13	1.1.1.2995.18	25.3957	291.11	258.78	25.25	0.4	2040.32
1	194.25	194.25	79.32	49.37	47.18	tr|A0A2R8QI77|A0A2R8QI77_DANRE	Periaxin OS=Danio rerio OX=7955 GN=prx PE=4 SV=1			0	99	LKPSGGEINIEGPDIK				-0.00226052	1665.89	556.304	1665.89	556.305	3	14	1.1.1.2999.17	25.6247	285.74	248.51	25.83	0.87	1851.95
1	194.25	194.25	79.32	49.37	47.18	tr|A0A2R8QI77|A0A2R8QI77_DANRE	Periaxin OS=Danio rerio OX=7955 GN=prx PE=4 SV=1			0	99	LKPSGGEINIEGPDIK				-0.00877537	1665.88	556.302	1665.89	556.305	3	15	2.1.1.2975.22	23.1213	389.06	378.59	23.14	0.69	4068.2
1	194.25	194.25	79.32	49.37	47.18	tr|A0A2R8QI77|A0A2R8QI77_DANRE	Periaxin OS=Danio rerio OX=7955 GN=prx PE=4 SV=1			0	99	LKPSGGEINIEGPDIK				-0.00942098	1665.88	556.302	1665.89	556.305	3	16	2.1.1.2977.22	23.2367	389.06	318.38	23.14	0.69	4214.92
1	194.25	194.25	79.32	49.37	47.18	tr|A0A2R8QI77|A0A2R8QI77_DANRE	Periaxin OS=Danio rerio OX=7955 GN=prx PE=4 SV=1			0	99	LKPSGGEINIEGPDIK				-0.0015281	1665.89	556.305	1665.89	556.305	3	11	1.1.1.2987.14	24.9273	2932.81	353.39	23.05	0.58	2325.66
1	194.25	194.25	79.32	49.37	47.18	tr|A0A2R8QI77|A0A2R8QI77_DANRE	Periaxin OS=Danio rerio OX=7955 GN=prx PE=4 SV=1			0	99	LKPSGGEINIEGPDIK				-0.0084861	1665.89	556.302	1665.89	556.305	3	11	1.1.1.3018.19	26.7253	215.53	202.61	26.52	0.64	1342.85
1	194.25	194.25	79.32	49.37	47.18	tr|A0A2R8QI77|A0A2R8QI77_DANRE	Periaxin OS=Danio rerio OX=7955 GN=prx PE=4 SV=1			0	99	LKPSGGEINIEGPDIK				0.00204393	1665.9	556.306	1665.89	556.305	3	11	1.1.1.3031.15	27.4696	202.47	159.34	27.33	1.1	1271.77
1	194.25	194.25	79.32	49.37	47.18	tr|A0A2R8QI77|A0A2R8QI77_DANRE	Periaxin OS=Danio rerio OX=7955 GN=prx PE=4 SV=1			0	99	LKPSGGEINIEGPDIK				-0.0084861	1665.89	556.302	1665.89	556.305	3	11	1.1.1.3012.20	26.3802	215.53	168.53	26.52	0.64	1588.6
1	194.25	194.25	79.32	49.37	47.18	tr|A0A2R8QI77|A0A2R8QI77_DANRE	Periaxin OS=Danio rerio OX=7955 GN=prx PE=4 SV=1			0	99	LKPSGGEINIEGPDIK				-0.00942098	1665.88	556.302	1665.89	556.305	3	12	2.1.1.2981.19	23.4618	389.06	185.27	23.14	0.69	3591.21
1	194.25	194.25	79.32	49.37	47.18	tr|A0A2R8QI77|A0A2R8QI77_DANRE	Periaxin OS=Danio rerio OX=7955 GN=prx PE=4 SV=1			0	99	LKPSGGEINIEGPDIK				0.00204393	1665.9	556.306	1665.89	556.305	3	9	1.1.1.3029.13	27.3508	202.47	189.21	27.33	1.1	1490.42
1	194.25	194.25	79.32	49.37	47.18	tr|A0A2R8QI77|A0A2R8QI77_DANRE	Periaxin OS=Danio rerio OX=7955 GN=prx PE=4 SV=1			0	99	LKPSGGEINIEGPDIK				-0.00226052	1665.89	556.304	1665.89	556.305	3	10	1.1.1.3005.17	25.971	285.74	247.91	25.83	0.87	1902.13
1	194.25	194.25	79.32	49.37	47.18	tr|A0A2R8QI77|A0A2R8QI77_DANRE	Periaxin OS=Danio rerio OX=7955 GN=prx PE=4 SV=1			0	99	LKPSGGEINIEGPDIK				0.00204393	1665.9	556.306	1665.89	556.305	3	10	1.1.1.3024.14	27.0636	202.47	176.64	27.33	1.1	1448.03
1	194.25	194.25	79.32	49.37	47.18	tr|A0A2R8QI77|A0A2R8QI77_DANRE	Periaxin OS=Danio rerio OX=7955 GN=prx PE=4 SV=1			0	99	LKPSGGEINIEGPDIK				-0.00942098	1665.88	556.302	1665.89	556.305	3	11	2.1.1.2979.23	23.3535	389.06	226.42	23.14	0.69	3516.22
1	194.25	194.25	79.32	49.37	47.18	tr|A0A2R8QI77|A0A2R8QI77_DANRE	Periaxin OS=Danio rerio OX=7955 GN=prx PE=4 SV=1			0	98.36	LKPSGGEINIEGPDIK				-0.00226052	1665.89	556.304	1665.89	556.305	3	9	1.1.1.3008.21	26.1508	285.74	218.08	25.83	0.87	1905.18
1	194.25	194.25	79.32	49.37	47.18	tr|A0A2R8QI77|A0A2R8QI77_DANRE	Periaxin OS=Danio rerio OX=7955 GN=prx PE=4 SV=1			0	96.43	LKPSGGEINIEGPDIK				0.00204393	1665.9	556.306	1665.89	556.305	3	8	1.1.1.3040.15	27.9897	202.47	130.84	27.33	1.1	1192.21
1	194.25	194.25	79.32	49.37	47.18	tr|A0A2R8QI77|A0A2R8QI77_DANRE	Periaxin OS=Danio rerio OX=7955 GN=prx PE=4 SV=1			0	82.59	LKPSGGEINIEGPDIK				0.000395976	1665.89	556.305	1665.89	556.305	3	7	1.1.1.3045.16	28.2802	156.58	145.39	28.25	0.64	1183.29
1	194.25	194.25	79.32	49.37	47.18	tr|A0A2R8QI77|A0A2R8QI77_DANRE	Periaxin OS=Danio rerio OX=7955 GN=prx PE=4 SV=1			0	79.8	LKPSGGEINIEGPDIK				-0.00942098	1665.88	556.302	1665.89	556.305	3	8	2.1.1.2985.20	23.6941	389.06	153.41	23.14	0.69	3478.63
1	194.25	194.25	79.32	49.37	47.18	tr|A0A2R8QI77|A0A2R8QI77_DANRE	Periaxin OS=Danio rerio OX=7955 GN=prx PE=4 SV=1			0	51.39	LKPSGGEINIEGPDIK				-0.00942098	1665.88	556.302	1665.89	556.305	3	9	2.1.1.2987.21	23.8113	389.06	122.49	23.14	0.69	3125.39
1	194.25	194.25	79.32	49.37	47.18	tr|A0A2R8QI77|A0A2R8QI77_DANRE	Periaxin OS=Danio rerio OX=7955 GN=prx PE=4 SV=1			0	35.94	LKPSGGEINIEGPDIK				-0.00942098	1665.88	556.302	1665.89	556.305	3	8	2.1.1.2989.22	23.9281	389.06	129.72	23.14	0.69	3111.11
1	194.25	194.25	79.32	49.37	47.18	tr|A0A2R8QI77|A0A2R8QI77_DANRE	Periaxin OS=Danio rerio OX=7955 GN=prx PE=4 SV=1			0	32.8	LKPSGGEINIEGPDIK				-0.0084861	1665.89	556.302	1665.89	556.305	3	6	1.1.1.3016.17	26.6063	215.53	205.24	26.52	0.64	1200.37
1	194.25	194.25	79.32	49.37	47.18	tr|A0A2R8QI77|A0A2R8QI77_DANRE	Periaxin OS=Danio rerio OX=7955 GN=prx PE=4 SV=1			0	30.19	LKPSGGEINIEGPDIK				-0.00942098	1665.88	556.302	1665.89	556.305	3	7	2.1.1.2983.21	23.5805	389.06	165.7	23.14	0.69	3029.58
1	194.25	194.25	79.32	49.37	47.18	tr|A0A2R8QI77|A0A2R8QI77_DANRE	Periaxin OS=Danio rerio OX=7955 GN=prx PE=4 SV=1			0	99	LKPSGGEINMK	Oxidation(M)@10			-0.00272198	1188.61	397.212	1188.62	397.213	3	16	1.1.1.2805.2	14.4611	178.71	150.06	14.62	0.63	2057.91
1	194.25	194.25	79.32	49.37	47.18	tr|A0A2R8QI77|A0A2R8QI77_DANRE	Periaxin OS=Danio rerio OX=7955 GN=prx PE=4 SV=1			0	99	LKPSGGEINMK	Oxidation(M)@10			-0.00272198	1188.61	397.212	1188.62	397.213	3	13	1.1.1.2809.3	14.6865	178.71	168.66	14.62	0.63	2117.24
1	194.25	194.25	79.32	49.37	47.18	tr|A0A2R8QI77|A0A2R8QI77_DANRE	Periaxin OS=Danio rerio OX=7955 GN=prx PE=4 SV=1			0	99	LPEHTIAEGPAIK				-0.00314587	1374.75	459.257	1374.75	459.258	3	18	1.1.1.2880.11	18.7654	1704.1	986.19	18.92	0.34	6758.95
1	194.25	194.25	79.32	49.37	47.18	tr|A0A2R8QI77|A0A2R8QI77_DANRE	Periaxin OS=Danio rerio OX=7955 GN=prx PE=4 SV=1			0	99	LPEHTIAEGPAIK				-0.00314587	1374.75	459.257	1374.75	459.258	3	19	1.1.1.2882.14	18.8859	1704.1	1613.57	18.92	0.34	9938
1	194.25	194.25	79.32	49.37	47.18	tr|A0A2R8QI77|A0A2R8QI77_DANRE	Periaxin OS=Danio rerio OX=7955 GN=prx PE=4 SV=1			0	99	LPEHTIAEGPAIK				-0.00314587	1374.75	459.257	1374.75	459.258	3	18	1.1.1.2884.11	18.9947	1704.1	1441.32	18.92	0.34	9225.56
1	194.25	194.25	79.32	49.37	47.18	tr|A0A2R8QI77|A0A2R8QI77_DANRE	Periaxin OS=Danio rerio OX=7955 GN=prx PE=4 SV=1			0	99	LPEHTIAEGPAIK				-0.00314587	1374.75	459.257	1374.75	459.258	3	14	1.1.1.2888.11	19.2206	1704.1	689.83	18.92	0.34	5065.19
1	194.25	194.25	79.32	49.37	47.18	tr|A0A2R8QI77|A0A2R8QI77_DANRE	Periaxin OS=Danio rerio OX=7955 GN=prx PE=4 SV=1			0	99	LPEHTIAEGPAIK				-0.00314587	1374.75	459.257	1374.75	459.258	3	15	1.1.1.2890.10	19.3321	1704.1	573.2	18.92	0.34	4365.95
1	194.25	194.25	79.32	49.37	47.18	tr|A0A2R8QI77|A0A2R8QI77_DANRE	Periaxin OS=Danio rerio OX=7955 GN=prx PE=4 SV=1			0	99	LPEHTIAEGPAIK				-0.00208931	1374.75	459.257	1374.75	459.258	3	12	2.1.1.2905.11	19.0733	489.02	439.6	19.11	0.34	4000.42
1	194.25	194.25	79.32	49.37	47.18	tr|A0A2R8QI77|A0A2R8QI77_DANRE	Periaxin OS=Danio rerio OX=7955 GN=prx PE=4 SV=1			0	99	LPEHTIAEGPAIK				-0.00208931	1374.75	459.257	1374.75	459.258	3	15	2.1.1.2907.12	19.1901	489.02	424.12	19.11	0.34	3706.37
1	194.25	194.25	79.32	49.37	47.18	tr|A0A2R8QI77|A0A2R8QI77_DANRE	Periaxin OS=Danio rerio OX=7955 GN=prx PE=4 SV=1			0	99	LPEHTIAEGPAIK				-0.00314587	1374.75	459.257	1374.75	459.258	3	12	1.1.1.2892.12	19.4488	1704.1	377.02	18.92	0.34	3940.62
1	194.25	194.25	79.32	49.37	47.18	tr|A0A2R8QI77|A0A2R8QI77_DANRE	Periaxin OS=Danio rerio OX=7955 GN=prx PE=4 SV=1			0	94.3	LPEHTIAEGPAIK				-0.00208931	1374.75	459.257	1374.75	459.258	3	10	2.1.1.2903.14	18.9628	489.02	229.07	19.11	0.34	2999.95
1	194.25	194.25	79.32	49.37	47.18	tr|A0A2R8QI77|A0A2R8QI77_DANRE	Periaxin OS=Danio rerio OX=7955 GN=prx PE=4 SV=1			0	91.04	LPEHTIAEGPAIK				-0.0112941	1374.74	459.254	1374.75	459.258	3	10	1.1.1.2902.8	20.0133	290.52	242.83	20.11	0.98	3728.47
1	194.25	194.25	79.32	49.37	47.18	tr|A0A2R8QI77|A0A2R8QI77_DANRE	Periaxin OS=Danio rerio OX=7955 GN=prx PE=4 SV=1			0	86.89	LPEHTIAEGPAIK				-0.00208931	1374.75	459.257	1374.75	459.258	3	9	2.1.1.2912.12	19.4746	489.02	164.82	19.11	0.34	2361.65
1	194.25	194.25	79.32	49.37	47.18	tr|A0A2R8QI77|A0A2R8QI77_DANRE	Periaxin OS=Danio rerio OX=7955 GN=prx PE=4 SV=1			0	83.15	LPEHTIAEGPAIK				-0.00208931	1374.75	459.257	1374.75	459.258	3	11	2.1.1.2914.14	19.5917	489.02	140.34	19.11	0.34	2207.88
1	194.25	194.25	79.32	49.37	47.18	tr|A0A2R8QI77|A0A2R8QI77_DANRE	Periaxin OS=Danio rerio OX=7955 GN=prx PE=4 SV=1			0	99	LPTVDISAPK				0.000677149	1039.59	520.803	1039.59	520.803	2	16	1.1.1.2958.16	23.2559	1210.45	1165.59	23.29	0.63	4642.49
1	194.25	194.25	79.32	49.37	47.18	tr|A0A2R8QI77|A0A2R8QI77_DANRE	Periaxin OS=Danio rerio OX=7955 GN=prx PE=4 SV=1			0	99	LPTVDISAPK				0.000677149	1039.59	520.803	1039.59	520.803	2	13	1.1.1.2960.13	23.3662	1210.45	1196.29	23.29	0.63	4226.18
1	194.25	194.25	79.32	49.37	47.18	tr|A0A2R8QI77|A0A2R8QI77_DANRE	Periaxin OS=Danio rerio OX=7955 GN=prx PE=4 SV=1			0	99	LPTVDISAPK				0.000677149	1039.59	520.803	1039.59	520.803	2	12	1.1.1.2962.18	23.49	1210.45	995.46	23.29	0.63	3796.65
1	194.25	194.25	79.32	49.37	47.18	tr|A0A2R8QI77|A0A2R8QI77_DANRE	Periaxin OS=Danio rerio OX=7955 GN=prx PE=4 SV=1			0	99	LPTVDISAPK				0.000677149	1039.59	520.803	1039.59	520.803	2	12	1.1.1.2964.17	23.6037	1210.45	714.77	23.29	0.63	3227.68
1	194.25	194.25	79.32	49.37	47.18	tr|A0A2R8QI77|A0A2R8QI77_DANRE	Periaxin OS=Danio rerio OX=7955 GN=prx PE=4 SV=1			0	99	LPTVDISAPK				0.000677149	1039.59	520.803	1039.59	520.803	2	9	1.1.1.2954.16	23.0251	1210.45	516.83	23.29	0.63	2542.01
1	194.25	194.25	79.32	49.37	47.18	tr|A0A2R8QI77|A0A2R8QI77_DANRE	Periaxin OS=Danio rerio OX=7955 GN=prx PE=4 SV=1			0	99	LPTVDISAPK				0.000677149	1039.59	520.803	1039.59	520.803	2	8	1.1.1.2974.16	24.1796	1210.45	335.3	23.29	0.63	1924.04
1	194.25	194.25	79.32	49.37	47.18	tr|A0A2R8QI77|A0A2R8QI77_DANRE	Periaxin OS=Danio rerio OX=7955 GN=prx PE=4 SV=1			0	99	MDNSLPR				0.00990453	831.401	416.708	831.391	416.703	2	9	1.1.1.2835.8	16.1732	254.96	244.99	16.16	0.86	3146.19
1	194.25	194.25	79.32	49.37	47.18	tr|A0A2R8QI77|A0A2R8QI77_DANRE	Periaxin OS=Danio rerio OX=7955 GN=prx PE=4 SV=1			0	85.7	MDNSLPR				0.00990453	831.401	416.708	831.391	416.703	2	8	1.1.1.2839.10	16.4052	254.96	208.18	16.16	0.86	3013.12
1	194.25	194.25	79.32	49.37	47.18	tr|A0A2R8QI77|A0A2R8QI77_DANRE	Periaxin OS=Danio rerio OX=7955 GN=prx PE=4 SV=1			0	62.31	MNLSTGEIK	Oxidation(M)@1; Deamidated(N)@2			0.00802746	1008.49	505.251	1008.48	505.247	2	6	1.1.1.2842.20	16.5937	297.89	296.19	16.62	0.8	1679.03
1	194.25	194.25	79.32	49.37	47.18	tr|A0A2R8QI77|A0A2R8QI77_DANRE	Periaxin OS=Danio rerio OX=7955 GN=prx PE=4 SV=1			0	99	MPAIDVSLPNVK	Deamidated(N)@10			0.0114696	1283.69	642.853	1283.68	642.847	2	13	1.1.1.3100.16	31.4607	329.37	321.52	31.43	0.99	2531.21
1	194.25	194.25	79.32	49.37	47.18	tr|A0A2R8QI77|A0A2R8QI77_DANRE	Periaxin OS=Danio rerio OX=7955 GN=prx PE=4 SV=1			0	99	MPAIDVSLPNVK	Oxidation(M)@1			0.00905256	1298.7	650.357	1298.69	650.352	2	10	1.1.1.3068.14	29.6276	176.2	145.18	29.81	1.04	1138.74
1	194.25	194.25	79.32	49.37	47.18	tr|A0A2R8QI77|A0A2R8QI77_DANRE	Periaxin OS=Danio rerio OX=7955 GN=prx PE=4 SV=1			0	99	MPAIDVSLPNVK	Deamidated(N)@10			0.0114696	1283.69	642.853	1283.68	642.847	2	11	1.1.1.3103.7	31.6201	329.37	277.37	31.43	0.99	2196.58
1	194.25	194.25	79.32	49.37	47.18	tr|A0A2R8QI77|A0A2R8QI77_DANRE	Periaxin OS=Danio rerio OX=7955 GN=prx PE=4 SV=1			0	96.99	MPAIDVSLPNVK	Deamidated(N)@10			0.0114696	1283.69	642.853	1283.68	642.847	2	9	1.1.1.3101.13	31.514	329.37	328.95	31.43	0.99	2275.96
1	194.25	194.25	79.32	49.37	47.18	tr|A0A2R8QI77|A0A2R8QI77_DANRE	Periaxin OS=Danio rerio OX=7955 GN=prx PE=4 SV=1			0	86.41	MPAIDVSLPNVK	Deamidated(N)@10			0.0114696	1283.69	642.853	1283.68	642.847	2	8	1.1.1.3097.18	31.2897	329.37	225.45	31.43	0.99	2271.06
1	194.25	194.25	79.32	49.37	47.18	tr|A0A2R8QI77|A0A2R8QI77_DANRE	Periaxin OS=Danio rerio OX=7955 GN=prx PE=4 SV=1			0	56.06	MPAIDVSLPNVK	Deamidated(N)@10			0.0114696	1283.69	642.853	1283.68	642.847	2	7	1.1.1.3099.12	31.3958	329.37	290.95	31.43	0.99	2252.57
1	194.25	194.25	79.32	49.37	47.18	tr|A0A2R8QI77|A0A2R8QI77_DANRE	Periaxin OS=Danio rerio OX=7955 GN=prx PE=4 SV=1			0	17.12	MPAIDVSLPNVK	Deamidated(N)@10			0.0114696	1283.69	642.853	1283.68	642.847	2	7	1.1.1.3098.12	31.3378	329.37	256.48	31.43	0.99	2003.33
1	194.25	194.25	79.32	49.37	47.18	tr|A0A2R8QI77|A0A2R8QI77_DANRE	Periaxin OS=Danio rerio OX=7955 GN=prx PE=4 SV=1			0	99	MPEVEISLPHGK				0.00408026	1335.69	446.237	1335.69	446.236	3	11	1.1.1.3011.7	26.3008	251.37	250.98	26.29	0.87	2369.24
1	194.25	194.25	79.32	49.37	47.18	tr|A0A2R8QI77|A0A2R8QI77_DANRE	Periaxin OS=Danio rerio OX=7955 GN=prx PE=4 SV=1			0	81.42	MPEVEISLPHGK				0.00408026	1335.69	446.237	1335.69	446.236	3	7	1.1.1.3021.4	26.8738	251.37	104.23	26.29	0.87	1655.88
1	194.25	194.25	79.32	49.37	47.18	tr|A0A2R8QI77|A0A2R8QI77_DANRE	Periaxin OS=Danio rerio OX=7955 GN=prx PE=4 SV=1			0	89.45	MPTIDISVPK	Oxidation(M)@1			-0.00191372	1115.59	558.801	1115.59	558.802	2	8	1.1.1.2991.20	25.1683	557.48	502.24	25.31	1.39	2055.71
1	194.25	194.25	79.32	49.37	47.18	tr|A0A2R8QI77|A0A2R8QI77_DANRE	Periaxin OS=Danio rerio OX=7955 GN=prx PE=4 SV=1			0	87.67	MPTIDISVPK	Oxidation(M)@1			-0.0048434	1115.58	558.8	1115.59	558.802	2	7	1.1.1.3006.18	26.0303	289.62	246.97	26.17	0.46	1631.11
1	194.25	194.25	79.32	49.37	47.18	tr|A0A2R8QI77|A0A2R8QI77_DANRE	Periaxin OS=Danio rerio OX=7955 GN=prx PE=4 SV=1			0	72.7	MPTIDISVPK	Oxidation(M)@1			-0.00191372	1115.59	558.801	1115.59	558.802	2	9	1.1.1.2989.18	25.0494	557.48	451.8	25.31	1.39	2263.57
1	194.25	194.25	79.32	49.37	47.18	tr|A0A2R8QI77|A0A2R8QI77_DANRE	Periaxin OS=Danio rerio OX=7955 GN=prx PE=4 SV=1			0	32.75	MPTIDISVPK	Oxidation(M)@1			-0.0048434	1115.58	558.8	1115.59	558.802	2	6	1.1.1.3010.17	26.2598	289.62	283.32	26.17	0.46	1440.63
1	194.25	194.25	79.32	49.37	47.18	tr|A0A2R8QI77|A0A2R8QI77_DANRE	Periaxin OS=Danio rerio OX=7955 GN=prx PE=4 SV=1			0	29.6	MPTIDISVPK	Oxidation(M)@1			-0.00191372	1115.59	558.801	1115.59	558.802	2	7	1.1.1.2993.18	25.2802	557.48	548.35	25.31	1.39	2240.77
1	194.25	194.25	79.32	49.37	47.18	tr|A0A2R8QI77|A0A2R8QI77_DANRE	Periaxin OS=Danio rerio OX=7955 GN=prx PE=4 SV=1			0	27.29	MPTIDISVPK	Oxidation(M)@1			-0.00191372	1115.59	558.801	1115.59	558.802	2	6	1.1.1.2995.19	25.3974	557.48	490.64	25.31	1.39	2043.62
1	194.25	194.25	79.32	49.37	47.18	tr|A0A2R8QI77|A0A2R8QI77_DANRE	Periaxin OS=Danio rerio OX=7955 GN=prx PE=4 SV=1			0	18.36	MPTIDISVPK	Oxidation(M)@1			-0.00191372	1115.59	558.801	1115.59	558.802	2	6	1.1.1.3003.18	25.8574	557.48	296.57	25.31	1.39	1696.29
1	194.25	194.25	79.32	49.37	47.18	tr|A0A2R8QI77|A0A2R8QI77_DANRE	Periaxin OS=Danio rerio OX=7955 GN=prx PE=4 SV=1			0	99	MPTIDSSLPHGIK				0.00399208	1394.73	465.916	1394.72	465.915	3	14	1.1.1.2988.6	24.9716	591.81	553.49	24.96	0.69	3285.36
1	194.25	194.25	79.32	49.37	47.18	tr|A0A2R8QI77|A0A2R8QI77_DANRE	Periaxin OS=Danio rerio OX=7955 GN=prx PE=4 SV=1			0	99	MPTIDSSLPHGIK				0.00399208	1394.73	465.916	1394.72	465.915	3	13	1.1.1.2990.9	25.0922	591.81	433.36	24.96	0.69	2734.41
1	194.25	194.25	79.32	49.37	47.18	tr|A0A2R8QI77|A0A2R8QI77_DANRE	Periaxin OS=Danio rerio OX=7955 GN=prx PE=4 SV=1			0	99	MPTIDSSLPHGIK				0.00399208	1394.73	465.916	1394.72	465.915	3	10	1.1.1.2994.11	25.3264	591.81	283.99	24.96	0.69	1656.59
1	194.25	194.25	79.32	49.37	47.18	tr|A0A2R8QI77|A0A2R8QI77_DANRE	Periaxin OS=Danio rerio OX=7955 GN=prx PE=4 SV=1			0	98.36	MPTIDSSLPHGIK				0.00399208	1394.73	465.916	1394.72	465.915	3	9	1.1.1.2996.10	25.4401	591.81	212.86	24.96	0.69	1627.83
1	194.25	194.25	79.32	49.37	47.18	tr|A0A2R8QI77|A0A2R8QI77_DANRE	Periaxin OS=Danio rerio OX=7955 GN=prx PE=4 SV=1			0	97.16	MPTIDSSLPHGIK				0.00399208	1394.73	465.916	1394.72	465.915	3	8	1.1.1.2983.9	24.688	591.81	320.73	24.96	0.69	2360.85
1	194.25	194.25	79.32	49.37	47.18	tr|A0A2R8QI77|A0A2R8QI77_DANRE	Periaxin OS=Danio rerio OX=7955 GN=prx PE=4 SV=1			0	48.88	MPTIDSSLPHGIK				0.00399208	1394.73	465.916	1394.72	465.915	3	7	1.1.1.3007.8	26.0713	591.81	112.48	24.96	0.69	1385.76
1	194.25	194.25	79.32	49.37	47.18	tr|A0A2R8QI77|A0A2R8QI77_DANRE	Periaxin OS=Danio rerio OX=7955 GN=prx PE=4 SV=1			0	95.03	MSDINVPEVTLGGNIK	Oxidation(M)@1			0.00156516	1701.86	851.938	1701.86	851.938	2	9	1.1.1.3071.31	29.8077	372.89	353.97	29.7	1.45	2049.72
1	194.25	194.25	79.32	49.37	47.18	tr|A0A2R8QI77|A0A2R8QI77_DANRE	Periaxin OS=Danio rerio OX=7955 GN=prx PE=4 SV=1			0	99	MSPESDISIEVPDSHIK	Oxidation(M)@1			-0.00427776	1898.89	633.97	1898.89	633.972	3	13	1.1.1.3002.24	25.8095	522.49	504.1	25.71	0.75	3082.3
1	194.25	194.25	79.32	49.37	47.18	tr|A0A2R8QI77|A0A2R8QI77_DANRE	Periaxin OS=Danio rerio OX=7955 GN=prx PE=4 SV=1			0	25.63	MSPESDISIEVPDSHIK	Oxidation(M)@1			-0.00427776	1898.89	633.97	1898.89	633.972	3	6	1.1.1.3020.25	26.851	522.49	183.39	25.71	0.75	1557.32
1	194.25	194.25	79.32	49.37	47.18	tr|A0A2R8QI77|A0A2R8QI77_DANRE	Periaxin OS=Danio rerio OX=7955 GN=prx PE=4 SV=1			0	88.82	MTIPTFK	Oxidation(M)@1			-0.0151189	852.426	427.221	852.442	427.228	2	8	1.1.1.2909.6	20.4109	373.42	324.4	20.17	1.26	3302.35
1	194.25	194.25	79.32	49.37	47.18	tr|A0A2R8QI77|A0A2R8QI77_DANRE	Periaxin OS=Danio rerio OX=7955 GN=prx PE=4 SV=1			0	87.82	MTIPTFK	Oxidation(M)@1			-0.0151189	852.426	427.221	852.442	427.228	2	8	1.1.1.2911.5	20.5249	373.42	303.03	20.17	1.26	3018.05
1	194.25	194.25	79.32	49.37	47.18	tr|A0A2R8QI77|A0A2R8QI77_DANRE	Periaxin OS=Danio rerio OX=7955 GN=prx PE=4 SV=1			0	39.66	MTIPTFK	Oxidation(M)@1			-0.0151189	852.426	427.221	852.442	427.228	2	6	1.1.1.2903.6	20.0674	373.42	323.3	20.17	1.26	3500.56
1	194.25	194.25	79.32	49.37	47.18	tr|A0A2R8QI77|A0A2R8QI77_DANRE	Periaxin OS=Danio rerio OX=7955 GN=prx PE=4 SV=1			0	18.78	MTIPTFK	Oxidation(M)@1			-0.0151189	852.426	427.221	852.442	427.228	2	6	1.1.1.2907.5	20.2944	373.42	314.12	20.17	1.26	3026.81
1	194.25	194.25	79.32	49.37	47.18	tr|A0A2R8QI77|A0A2R8QI77_DANRE	Periaxin OS=Danio rerio OX=7955 GN=prx PE=4 SV=1			0	88.3	QIGTTESKPK	Gln->pyro-Glu@N-term			9.22885e-05	1070.56	536.288	1070.56	536.288	2	9	1.1.1.2823.13	15.5076	265.54	205.83	15.42	0.57	1353.99
1	194.25	194.25	79.32	49.37	47.18	tr|A0A2R8QI77|A0A2R8QI77_DANRE	Periaxin OS=Danio rerio OX=7955 GN=prx PE=4 SV=1			0	99	RSGADVNVEGPDIEGGK			missed R-S@1	-0.00154152	1698.82	567.279	1698.82	567.28	3	12	1.1.1.2875.22	18.4954	707.26	314.39	18.74	0.46	2166.53
1	194.25	194.25	79.32	49.37	47.18	tr|A0A2R8QI77|A0A2R8QI77_DANRE	Periaxin OS=Danio rerio OX=7955 GN=prx PE=4 SV=1			0	67.92	RSGADVNVEGPDIEGGK			missed R-S@1	-0.00154152	1698.82	567.279	1698.82	567.28	3	8	1.1.1.2877.24	18.614	707.26	552.86	18.74	0.46	2506.66
1	194.25	194.25	79.32	49.37	47.18	tr|A0A2R8QI77|A0A2R8QI77_DANRE	Periaxin OS=Danio rerio OX=7955 GN=prx PE=4 SV=1			0	99	SGADVNVEGPDIEGGK				0.00481105	1542.72	772.368	1542.72	772.365	2	23	1.1.1.2896.30	19.7065	1072.37	981.61	19.77	0.63	4941.62
1	194.25	194.25	79.32	49.37	47.18	tr|A0A2R8QI77|A0A2R8QI77_DANRE	Periaxin OS=Danio rerio OX=7955 GN=prx PE=4 SV=1			0	99	SGADVNVEGPDIEGGK				0.00481105	1542.72	772.368	1542.72	772.365	2	21	1.1.1.2898.30	19.8206	1072.37	1036.37	19.77	0.63	4185.49
1	194.25	194.25	79.32	49.37	47.18	tr|A0A2R8QI77|A0A2R8QI77_DANRE	Periaxin OS=Danio rerio OX=7955 GN=prx PE=4 SV=1			0	99	SGADVNVEGPDIEGGK				0.00481105	1542.72	772.368	1542.72	772.365	2	20	1.1.1.2900.30	19.9351	1072.37	814.1	19.77	0.63	3312.65
1	194.25	194.25	79.32	49.37	47.18	tr|A0A2R8QI77|A0A2R8QI77_DANRE	Periaxin OS=Danio rerio OX=7955 GN=prx PE=4 SV=1			0	99	SGADVNVEGPDIEGGK				0.00481105	1542.72	772.368	1542.72	772.365	2	20	1.1.1.2902.30	20.0499	1072.37	545.6	19.77	0.63	2869.54
1	194.25	194.25	79.32	49.37	47.18	tr|A0A2R8QI77|A0A2R8QI77_DANRE	Periaxin OS=Danio rerio OX=7955 GN=prx PE=4 SV=1			0	99	SGADVNVEGPDIEGGK				0.00481105	1542.72	772.368	1542.72	772.365	2	19	1.1.1.2904.30	20.1651	1072.37	440.17	19.77	0.63	2367.04
1	194.25	194.25	79.32	49.37	47.18	tr|A0A2R8QI77|A0A2R8QI77_DANRE	Periaxin OS=Danio rerio OX=7955 GN=prx PE=4 SV=1			0	99	SGADVNVEGPDIEGGK				0.00481105	1542.72	772.368	1542.72	772.365	2	16	1.1.1.2908.30	20.3939	1072.37	365.23	19.77	0.63	1660.59
1	194.25	194.25	79.32	49.37	47.18	tr|A0A2R8QI77|A0A2R8QI77_DANRE	Periaxin OS=Danio rerio OX=7955 GN=prx PE=4 SV=1			0	99	SGADVNVEGPDIEGGK				0.00481105	1542.72	772.368	1542.72	772.365	2	17	1.1.1.2910.30	20.5087	1072.37	316.87	19.77	0.63	1611.54
1	194.25	194.25	79.32	49.37	47.18	tr|A0A2R8QI77|A0A2R8QI77_DANRE	Periaxin OS=Danio rerio OX=7955 GN=prx PE=4 SV=1			0	99	SGADVNVEGPDIEGGK				0.00342453	1542.72	772.367	1542.72	772.365	2	17	1.1.1.2920.30	21.086	269.13	208.89	20.92	0.52	1572.41
1	194.25	194.25	79.32	49.37	47.18	tr|A0A2R8QI77|A0A2R8QI77_DANRE	Periaxin OS=Danio rerio OX=7955 GN=prx PE=4 SV=1			0	99	SPEGEVTLEGPGAK				-0.00409689	1369.67	685.841	1369.67	685.844	2	21	1.1.1.2887.29	19.1942	829.68	810.48	19.26	0.62	2962.52
1	194.25	194.25	79.32	49.37	47.18	tr|A0A2R8QI77|A0A2R8QI77_DANRE	Periaxin OS=Danio rerio OX=7955 GN=prx PE=4 SV=1			0	99	SRPVEVNLEGPEVK				0.000316554	1551.83	518.283	1551.83	518.282	3	17	1.1.1.2914.19	20.7211	1017.2	765.68	20.86	0.46	4713.87
1	194.25	194.25	79.32	49.37	47.18	tr|A0A2R8QI77|A0A2R8QI77_DANRE	Periaxin OS=Danio rerio OX=7955 GN=prx PE=4 SV=1			0	99	SRPVEVNLEGPEVK				0.000316554	1551.83	518.283	1551.83	518.282	3	16	1.1.1.2916.20	20.8382	1017.2	1017.13	20.86	0.46	5393.74
1	194.25	194.25	79.32	49.37	47.18	tr|A0A2R8QI77|A0A2R8QI77_DANRE	Periaxin OS=Danio rerio OX=7955 GN=prx PE=4 SV=1			0	99	SRPVEVNLEGPEVK				0.000316554	1551.83	518.283	1551.83	518.282	3	16	1.1.1.2918.19	20.9522	1017.2	807.91	20.86	0.46	4963.62
1	194.25	194.25	79.32	49.37	47.18	tr|A0A2R8QI77|A0A2R8QI77_DANRE	Periaxin OS=Danio rerio OX=7955 GN=prx PE=4 SV=1			0	99	SRPVEVNLEGPEVK				0.00416182	1551.83	518.284	1551.83	518.282	3	15	1.1.1.2920.19	21.0677	1017.2	595.02	20.86	0.46	3473.02
1	194.25	194.25	79.32	49.37	47.18	tr|A0A2R8QI77|A0A2R8QI77_DANRE	Periaxin OS=Danio rerio OX=7955 GN=prx PE=4 SV=1			0	99	SRPVEVNLEGPEVK				0.00416182	1551.83	518.284	1551.83	518.282	3	15	1.1.1.2922.19	21.183	1017.2	415.18	20.86	0.46	3087.7
1	194.25	194.25	79.32	49.37	47.18	tr|A0A2R8QI77|A0A2R8QI77_DANRE	Periaxin OS=Danio rerio OX=7955 GN=prx PE=4 SV=1			0	99	SRPVEVNLEGPEVK				0.00416182	1551.83	518.284	1551.83	518.282	3	13	1.1.1.2926.19	21.4142	1017.2	259.14	20.86	0.46	2612.39
1	194.25	194.25	79.32	49.37	47.18	tr|A0A2R8QI77|A0A2R8QI77_DANRE	Periaxin OS=Danio rerio OX=7955 GN=prx PE=4 SV=1			0	99	SRPVEVNLEGPEVK				0.00416182	1551.83	518.284	1551.83	518.282	3	12	1.1.1.2928.18	21.5278	1017.2	248.35	20.86	0.46	2414.34
1	194.25	194.25	79.32	49.37	47.18	tr|A0A2R8QI77|A0A2R8QI77_DANRE	Periaxin OS=Danio rerio OX=7955 GN=prx PE=4 SV=1			0	99	SRPVEVNLEGPEVK				0.00416182	1551.83	518.284	1551.83	518.282	3	12	1.1.1.2930.17	21.6418	1017.2	240.01	20.86	0.46	2479.52
1	194.25	194.25	79.32	49.37	47.18	tr|A0A2R8QI77|A0A2R8QI77_DANRE	Periaxin OS=Danio rerio OX=7955 GN=prx PE=4 SV=1			0	99	SRPVEVNLEGPEVK				0.00416182	1551.83	518.284	1551.83	518.282	3	12	1.1.1.2940.17	22.2193	1017.2	197.51	20.86	0.46	1887.26
1	194.25	194.25	79.32	49.37	47.18	tr|A0A2R8QI77|A0A2R8QI77_DANRE	Periaxin OS=Danio rerio OX=7955 GN=prx PE=4 SV=1			0	99	SRPVEVNLEGPEVK				-0.00292614	1551.82	518.282	1551.83	518.282	3	13	2.1.1.2940.16	21.0926	327.53	221.63	20.95	0.63	2978.16
1	194.25	194.25	79.32	49.37	47.18	tr|A0A2R8QI77|A0A2R8QI77_DANRE	Periaxin OS=Danio rerio OX=7955 GN=prx PE=4 SV=1			0	99	SRPVEVNLEGPEVK				0.00416182	1551.83	518.284	1551.83	518.282	3	10	1.1.1.2942.20	22.3394	1017.2	175.91	20.86	0.46	1801.26
1	194.25	194.25	79.32	49.37	47.18	tr|A0A2R8QI77|A0A2R8QI77_DANRE	Periaxin OS=Danio rerio OX=7955 GN=prx PE=4 SV=1			0	99	SRPVEVNLEGPEVK	Deamidated(N)@7			0.0111155	1552.82	518.614	1552.81	518.611	3	13	1.1.1.2917.11	20.881	512.83	493.07	20.86	0.58	4189.59
1	194.25	194.25	79.32	49.37	47.18	tr|A0A2R8QI77|A0A2R8QI77_DANRE	Periaxin OS=Danio rerio OX=7955 GN=prx PE=4 SV=1			0	99	SRPVEVNLEGPEVK				0.00416182	1551.83	518.284	1551.83	518.282	3	9	1.1.1.2932.18	21.7588	1017.2	250.59	20.86	0.46	2399.84
1	194.25	194.25	79.32	49.37	47.18	tr|A0A2R8QI77|A0A2R8QI77_DANRE	Periaxin OS=Danio rerio OX=7955 GN=prx PE=4 SV=1			0	99	SRPVEVNLEGPEVK				-0.00292614	1551.82	518.282	1551.83	518.282	3	10	2.1.1.2946.16	21.4388	327.53	128.38	20.95	0.63	2186.48
1	194.25	194.25	79.32	49.37	47.18	tr|A0A2R8QI77|A0A2R8QI77_DANRE	Periaxin OS=Danio rerio OX=7955 GN=prx PE=4 SV=1			0	97.93	SRPVEVNLEGPEVK				-0.00292614	1551.82	518.282	1551.83	518.282	3	8	2.1.1.2944.19	21.3285	327.53	130.26	20.95	0.63	2255.68
1	194.25	194.25	79.32	49.37	47.18	tr|A0A2R8QI77|A0A2R8QI77_DANRE	Periaxin OS=Danio rerio OX=7955 GN=prx PE=4 SV=1			0	97.77	SRPVEVNLEGPEVK				0.00416182	1551.83	518.284	1551.83	518.282	3	11	1.1.1.2919.13	21	1017.2	709.59	20.86	0.46	3643.78
1	194.25	194.25	79.32	49.37	47.18	tr|A0A2R8QI77|A0A2R8QI77_DANRE	Periaxin OS=Danio rerio OX=7955 GN=prx PE=4 SV=1			0	97.19	SRPVEVNLEGPEVK	Deamidated(N)@7			0.0111155	1552.82	518.614	1552.81	518.611	3	12	1.1.1.2915.15	20.7721	512.83	464.22	20.86	0.58	4576.19
1	194.25	194.25	79.32	49.37	47.18	tr|A0A2R8QI77|A0A2R8QI77_DANRE	Periaxin OS=Danio rerio OX=7955 GN=prx PE=4 SV=1			0	93.99	SRPVEVNLEGPEVK				0.00416182	1551.83	518.284	1551.83	518.282	3	7	1.1.1.2936.17	21.9881	1017.2	224.89	20.86	0.46	2101.2
1	194.25	194.25	79.32	49.37	47.18	tr|A0A2R8QI77|A0A2R8QI77_DANRE	Periaxin OS=Danio rerio OX=7955 GN=prx PE=4 SV=1			0	85.29	SRPVEVNLEGPEVK				-0.00292614	1551.82	518.282	1551.83	518.282	3	9	2.1.1.2952.18	21.7883	327.53	80.72	20.95	0.63	2756.18
1	194.25	194.25	79.32	49.37	47.18	tr|A0A2R8QI77|A0A2R8QI77_DANRE	Periaxin OS=Danio rerio OX=7955 GN=prx PE=4 SV=1			0	81.97	SRPVEVNLEGPEVK				-0.00186596	1551.82	776.919	1551.83	776.92	2	8	1.1.1.2916.31	20.8565	390.63	389.46	20.86	0.75	1108.8
1	194.25	194.25	79.32	49.37	47.18	tr|A0A2R8QI77|A0A2R8QI77_DANRE	Periaxin OS=Danio rerio OX=7955 GN=prx PE=4 SV=1			0	32.94	SRPVEVNLEGPEVK	Deamidated(N)@7			0.0149578	1552.82	518.615	1552.81	518.611	3	8	1.1.1.2921.14	21.117	512.83	263.47	20.86	0.58	3047.41
1	194.25	194.25	79.32	49.37	47.18	tr|A0A2R8QI77|A0A2R8QI77_DANRE	Periaxin OS=Danio rerio OX=7955 GN=prx PE=4 SV=1			0	26.45	SRPVEVNLEGPEVK				-0.00292614	1551.82	518.282	1551.83	518.282	3	7	2.1.1.2954.14	21.8971	327.53	85.06	20.95	0.63	2453.77
1	194.25	194.25	79.32	49.37	47.18	tr|A0A2R8QI77|A0A2R8QI77_DANRE	Periaxin OS=Danio rerio OX=7955 GN=prx PE=4 SV=1			0	22.31	SRPVEVNLEGPEVK	Deamidated(N)@7			0.0111155	1552.82	518.614	1552.81	518.611	3	9	1.1.1.2913.12	20.6517	512.83	240.84	20.86	0.58	3657.22
1	194.25	194.25	79.32	49.37	47.18	tr|A0A2R8QI77|A0A2R8QI77_DANRE	Periaxin OS=Danio rerio OX=7955 GN=prx PE=4 SV=1			0	99	STDRENVELLK			missed R-E@4	-0.00285445	1302.68	435.232	1302.68	435.233	3	14	1.1.1.2868.8	18.0686	495.01	463.08	18.11	0.63	6240.07
1	194.25	194.25	79.32	49.37	47.18	tr|A0A2R8QI77|A0A2R8QI77_DANRE	Periaxin OS=Danio rerio OX=7955 GN=prx PE=4 SV=1			0	99	STDRENVELLK			missed R-E@4	-0.00285445	1302.68	435.232	1302.68	435.233	3	16	1.1.1.2869.12	18.1329	495.01	474.6	18.11	0.63	6128.59
1	194.25	194.25	79.32	49.37	47.18	tr|A0A2R8QI77|A0A2R8QI77_DANRE	Periaxin OS=Danio rerio OX=7955 GN=prx PE=4 SV=1			0	98.67	STDRENVELLK			missed R-E@4	-0.00285445	1302.68	435.232	1302.68	435.233	3	10	1.1.1.2871.11	18.2466	495.01	353.23	18.11	0.63	4796.07
1	194.25	194.25	79.32	49.37	47.18	tr|A0A2R8QI77|A0A2R8QI77_DANRE	Periaxin OS=Danio rerio OX=7955 GN=prx PE=4 SV=1			0	99	TEVDVSEADIR				0.000452758	1232.59	617.302	1232.59	617.302	2	15	1.1.1.2902.25	20.0416	867.24	858.1	20	1.09	3331.05
1	194.25	194.25	79.32	49.37	47.18	tr|A0A2R8QI77|A0A2R8QI77_DANRE	Periaxin OS=Danio rerio OX=7955 GN=prx PE=4 SV=1			0	99	TEVDVSEADIR				0.000452758	1232.59	617.302	1232.59	617.302	2	17	1.1.1.2904.26	20.1584	867.24	681.03	20	1.09	3053.11
1	194.25	194.25	79.32	49.37	47.18	tr|A0A2R8QI77|A0A2R8QI77_DANRE	Periaxin OS=Danio rerio OX=7955 GN=prx PE=4 SV=1			0	99	TEVDVSEADIR				0.000452758	1232.59	617.302	1232.59	617.302	2	16	1.1.1.2906.25	20.2707	867.24	554.71	20	1.09	2330.52
1	194.25	194.25	79.32	49.37	47.18	tr|A0A2R8QI77|A0A2R8QI77_DANRE	Periaxin OS=Danio rerio OX=7955 GN=prx PE=4 SV=1			0	99	TEVDVSEADIR				0.000452758	1232.59	617.302	1232.59	617.302	2	13	1.1.1.2908.26	20.3873	867.24	504.18	20	1.09	1990.62
1	194.25	194.25	79.32	49.37	47.18	tr|A0A2R8QI77|A0A2R8QI77_DANRE	Periaxin OS=Danio rerio OX=7955 GN=prx PE=4 SV=1			0	99	TEVDVSEADIR				0.000452758	1232.59	617.302	1232.59	617.302	2	11	1.1.1.2911.25	20.5582	867.24	432.13	20	1.09	1833.69
1	194.25	194.25	79.32	49.37	47.18	tr|A0A2R8QI77|A0A2R8QI77_DANRE	Periaxin OS=Danio rerio OX=7955 GN=prx PE=4 SV=1			0	99	TEVDVSEADIR				0.000452758	1232.59	617.302	1232.59	617.302	2	13	1.1.1.2913.23	20.67	867.24	369.85	20	1.09	1834.75
1	194.25	194.25	79.32	49.37	47.18	tr|A0A2R8QI77|A0A2R8QI77_DANRE	Periaxin OS=Danio rerio OX=7955 GN=prx PE=4 SV=1			0	78.1	TEVDVSEADIR				0.00849616	1232.6	617.306	1232.59	617.302	2	7	1.1.1.2976.26	24.3118	240.51	197.32	23.86	0.75	1304.56
1	194.25	194.25	79.32	49.37	47.18	tr|A0A2R8QI77|A0A2R8QI77_DANRE	Periaxin OS=Danio rerio OX=7955 GN=prx PE=4 SV=1			0	91.28	TGDADNHEVEIR				0.00110309	1354.61	452.545	1354.61	452.544	3	9	1.1.1.2835.11	16.1782	400.29	302.56	16.05	0.91	2970.82
1	194.25	194.25	79.32	49.37	47.18	tr|A0A2R8QI77|A0A2R8QI77_DANRE	Periaxin OS=Danio rerio OX=7955 GN=prx PE=4 SV=1			0	31.68	TGDADNHEVEIR				0.00110309	1354.61	452.545	1354.61	452.544	3	7	1.1.1.2830.7	15.8871	400.29	269.57	16.05	0.91	1789.83
1	194.25	194.25	79.32	49.37	47.18	tr|A0A2R8QI77|A0A2R8QI77_DANRE	Periaxin OS=Danio rerio OX=7955 GN=prx PE=4 SV=1			0	38.77	TNIDIK	Deamidated(N)@2		cleaved M-T@N-term	-0.000831813	703.374	352.695	703.375	352.695	2	9	1.1.1.2851.2	17.0796	607.54	386.46	16.67	0.86	4337.29
1	194.25	194.25	79.32	49.37	47.18	tr|A0A2R8QI77|A0A2R8QI77_DANRE	Periaxin OS=Danio rerio OX=7955 GN=prx PE=4 SV=1			0	31.66	TNIDIK	Deamidated(N)@2		cleaved M-T@N-term	-0.000831813	703.374	352.695	703.375	352.695	2	8	1.1.1.2853.2	17.194	607.54	416.65	16.67	0.86	4203.58
1	194.25	194.25	79.32	49.37	47.18	tr|A0A2R8QI77|A0A2R8QI77_DANRE	Periaxin OS=Danio rerio OX=7955 GN=prx PE=4 SV=1			0	31.4	TNIDIK	Deamidated(N)@2		cleaved M-T@N-term	-0.000831813	703.374	352.695	703.375	352.695	2	9	1.1.1.2843.2	16.621	607.54	598.69	16.67	0.86	5522.1
1	194.25	194.25	79.32	49.37	47.18	tr|A0A2R8QI77|A0A2R8QI77_DANRE	Periaxin OS=Danio rerio OX=7955 GN=prx PE=4 SV=1			0	31.23	TNIDIK	Deamidated(N)@2		cleaved M-T@N-term	0.000510963	703.376	352.695	703.375	352.695	2	8	1.1.1.2860.2	17.5978	607.54	343.74	16.67	1.38	3475.63
1	194.25	194.25	79.32	49.37	47.18	tr|A0A2R8QI77|A0A2R8QI77_DANRE	Periaxin OS=Danio rerio OX=7955 GN=prx PE=4 SV=1			0	28.73	TNIDIK	Deamidated(N)@2		cleaved M-T@N-term	-0.000831813	703.374	352.695	703.375	352.695	2	8	1.1.1.2856.2	17.3669	607.54	427.43	16.67	0.86	3946.62
1	194.25	194.25	79.32	49.37	47.18	tr|A0A2R8QI77|A0A2R8QI77_DANRE	Periaxin OS=Danio rerio OX=7955 GN=prx PE=4 SV=1			0	24.37	TNIDIK	Deamidated(N)@2		cleaved M-T@N-term	-0.000831813	703.374	352.695	703.375	352.695	2	9	1.1.1.2847.2	16.8513	607.54	529.07	16.67	0.86	5342.98
1	194.25	194.25	79.32	49.37	47.18	tr|A0A2R8QI77|A0A2R8QI77_DANRE	Periaxin OS=Danio rerio OX=7955 GN=prx PE=4 SV=1			0	99	TPTVDMDVNIPK				0.000423494	1328.67	665.34	1328.66	665.34	2	12	1.1.1.3000.27	25.699	492.85	328.12	25.94	1.56	1669.4
1	194.25	194.25	79.32	49.37	47.18	tr|A0A2R8QI77|A0A2R8QI77_DANRE	Periaxin OS=Danio rerio OX=7955 GN=prx PE=4 SV=1			0	99	TPTVDMDVNIPK				0.000423494	1328.67	665.34	1328.66	665.34	2	13	1.1.1.3002.26	25.8129	492.85	441.52	25.94	1.56	1865.32
1	194.25	194.25	79.32	49.37	47.18	tr|A0A2R8QI77|A0A2R8QI77_DANRE	Periaxin OS=Danio rerio OX=7955 GN=prx PE=4 SV=1			0	99	TPTVDMDVNIPK				0.000423494	1328.67	665.34	1328.66	665.34	2	14	1.1.1.3004.26	25.9283	492.85	487.48	25.94	1.56	1961.53
1	194.25	194.25	79.32	49.37	47.18	tr|A0A2R8QI77|A0A2R8QI77_DANRE	Periaxin OS=Danio rerio OX=7955 GN=prx PE=4 SV=1			0	99	TPTVDMDVNIPK				0.000423494	1328.67	665.34	1328.66	665.34	2	14	1.1.1.3006.27	26.0453	492.85	434.28	25.94	1.56	1767.17
1	194.25	194.25	79.32	49.37	47.18	tr|A0A2R8QI77|A0A2R8QI77_DANRE	Periaxin OS=Danio rerio OX=7955 GN=prx PE=4 SV=1			0	99	TPTVDMDVNIPK				0.000423494	1328.67	665.34	1328.66	665.34	2	12	1.1.1.3013.21	26.4397	492.85	301.86	25.94	1.56	1406.94
1	194.25	194.25	79.32	49.37	47.18	tr|A0A2R8QI77|A0A2R8QI77_DANRE	Periaxin OS=Danio rerio OX=7955 GN=prx PE=4 SV=1			0	99	TPTVDMDVNIPK				0.000423494	1328.67	665.34	1328.66	665.34	2	11	1.1.1.3017.27	26.6808	492.85	277.18	25.94	1.56	1345.55
1	194.25	194.25	79.32	49.37	47.18	tr|A0A2R8QI77|A0A2R8QI77_DANRE	Periaxin OS=Danio rerio OX=7955 GN=prx PE=4 SV=1			0	98.7	TPTVDMDVNIPK	Oxidation(M)@6			-0.00170111	1344.66	673.336	1344.66	673.337	2	13	1.1.1.2921.27	21.1387	560.87	468.41	21.27	1.56	2940.33
1	194.25	194.25	79.32	49.37	47.18	tr|A0A2R8QI77|A0A2R8QI77_DANRE	Periaxin OS=Danio rerio OX=7955 GN=prx PE=4 SV=1			0	93.21	TPTVDMDVNIPK				0.000423494	1328.67	665.34	1328.66	665.34	2	8	1.1.1.3019.25	26.7931	492.85	239.52	25.94	1.56	1296.96
1	194.25	194.25	79.32	49.37	47.18	tr|A0A2R8QI77|A0A2R8QI77_DANRE	Periaxin OS=Danio rerio OX=7955 GN=prx PE=4 SV=1			0	99	TSGGEINIEGPDIK				0.000625853	1428.71	715.362	1428.71	715.362	2	23	1.1.1.2947.30	22.6446	1399.09	982.27	22.82	0.92	3434.73
1	194.25	194.25	79.32	49.37	47.18	tr|A0A2R8QI77|A0A2R8QI77_DANRE	Periaxin OS=Danio rerio OX=7955 GN=prx PE=4 SV=1			0	99	TSGGEINIEGPDIK				0.000625853	1428.71	715.362	1428.71	715.362	2	23	1.1.1.2949.28	22.7567	1399.09	1282.01	22.82	0.92	4521.31
1	194.25	194.25	79.32	49.37	47.18	tr|A0A2R8QI77|A0A2R8QI77_DANRE	Periaxin OS=Danio rerio OX=7955 GN=prx PE=4 SV=1			0	99	TSGGEINIEGPDIK				0.000625853	1428.71	715.362	1428.71	715.362	2	23	1.1.1.2951.30	22.8754	1399.09	1372.08	22.82	0.92	4600.99
1	194.25	194.25	79.32	49.37	47.18	tr|A0A2R8QI77|A0A2R8QI77_DANRE	Periaxin OS=Danio rerio OX=7955 GN=prx PE=4 SV=1			0	99	TSGGEINIEGPDIK				0.000625853	1428.71	715.362	1428.71	715.362	2	23	1.1.1.2953.28	22.9874	1399.09	1174.93	22.82	0.92	3594.21
1	194.25	194.25	79.32	49.37	47.18	tr|A0A2R8QI77|A0A2R8QI77_DANRE	Periaxin OS=Danio rerio OX=7955 GN=prx PE=4 SV=1			0	99	TSGGEINIEGPDIK				0.000625853	1428.71	715.362	1428.71	715.362	2	22	1.1.1.2955.24	23.0961	1399.09	949.43	22.82	0.92	3328.66
1	194.25	194.25	79.32	49.37	47.18	tr|A0A2R8QI77|A0A2R8QI77_DANRE	Periaxin OS=Danio rerio OX=7955 GN=prx PE=4 SV=1			0	99	TSGGEINIEGPDIK				0.000625853	1428.71	715.362	1428.71	715.362	2	20	1.1.1.2957.26	23.2149	1399.09	779.2	22.82	0.92	2926.73
1	194.25	194.25	79.32	49.37	47.18	tr|A0A2R8QI77|A0A2R8QI77_DANRE	Periaxin OS=Danio rerio OX=7955 GN=prx PE=4 SV=1			0	99	TSGGEINIEGPDIK				0.000625853	1428.71	715.362	1428.71	715.362	2	21	1.1.1.2959.26	23.3302	1399.09	679.3	22.82	0.92	2632.83
1	194.25	194.25	79.32	49.37	47.18	tr|A0A2R8QI77|A0A2R8QI77_DANRE	Periaxin OS=Danio rerio OX=7955 GN=prx PE=4 SV=1			0	99	TSGGEINIEGPDIK				0.000625853	1428.71	715.362	1428.71	715.362	2	22	1.1.1.2961.25	23.4439	1399.09	558.86	22.82	0.92	2144.79
1	194.25	194.25	79.32	49.37	47.18	tr|A0A2R8QI77|A0A2R8QI77_DANRE	Periaxin OS=Danio rerio OX=7955 GN=prx PE=4 SV=1			0	99	TSGGEINIEGPDIK				0.000625853	1428.71	715.362	1428.71	715.362	2	19	1.1.1.2963.29	23.566	1399.09	484.17	22.82	0.92	2207.28
1	194.25	194.25	79.32	49.37	47.18	tr|A0A2R8QI77|A0A2R8QI77_DANRE	Periaxin OS=Danio rerio OX=7955 GN=prx PE=4 SV=1			0	99	TSGGEINIEGPDIK				0.000625853	1428.71	715.362	1428.71	715.362	2	21	1.1.1.2965.30	23.683	1399.09	462.49	22.82	0.92	2099.7
1	194.25	194.25	79.32	49.37	47.18	tr|A0A2R8QI77|A0A2R8QI77_DANRE	Periaxin OS=Danio rerio OX=7955 GN=prx PE=4 SV=1			0	99	TSGGEINIEGPDIK				-0.00657629	1428.7	715.359	1428.71	715.362	2	18	1.1.1.2967.28	23.795	482.77	459.88	23.86	0.52	1990.66
1	194.25	194.25	79.32	49.37	47.18	tr|A0A2R8QI77|A0A2R8QI77_DANRE	Periaxin OS=Danio rerio OX=7955 GN=prx PE=4 SV=1			0	74.73	TSGGEINIEGPDIK				-0.0112243	1428.7	715.356	1428.71	715.362	2	8	1.1.1.3024.26	27.0836	288.2	244.35	26.81	0.69	1557.91
1	194.25	194.25	79.32	49.37	47.18	tr|A0A2R8QI77|A0A2R8QI77_DANRE	Periaxin OS=Danio rerio OX=7955 GN=prx PE=4 SV=1			0	50.74	TSGGEINIEGPDIK	Deamidated(N)@7			0.00220548	1429.7	715.855	1429.69	715.854	2	8	1.1.1.3002.27	25.8145	301.59	273.07	25.71	0.69	1614.6
1	194.25	194.25	79.32	49.37	47.18	tr|A0A2R8QI77|A0A2R8QI77_DANRE	Periaxin OS=Danio rerio OX=7955 GN=prx PE=4 SV=1			0	99	TVDPEASGSVGVDTDKIPK			missed K-I@16	0.00299862	1913.96	638.994	1913.96	638.993	3	9	1.1.1.2927.25	21.4818	540.94	494.86	21.38	0.64	2005.52
1	194.25	194.25	79.32	49.37	47.18	tr|A0A2R8QI77|A0A2R8QI77_DANRE	Periaxin OS=Danio rerio OX=7955 GN=prx PE=4 SV=1			0	71.48	TVDPEASGSVGVDTDKIPK			missed K-I@16	0.00299862	1913.96	638.994	1913.96	638.993	3	9	1.1.1.2938.27	22.1205	540.94	163.53	21.38	0.64	1946.82
1	194.25	194.25	79.32	49.37	47.18	tr|A0A2R8QI77|A0A2R8QI77_DANRE	Periaxin OS=Danio rerio OX=7955 GN=prx PE=4 SV=1			0	99	TVPESEVSIRPGAQTLDLR				-0.00123677	2067.09	690.039	2067.1	690.039	3	11	1.1.1.3027.23	27.2553	1010.31	1001.77	27.27	0.87	4120.62
1	194.25	194.25	79.32	49.37	47.18	tr|A0A2R8QI77|A0A2R8QI77_DANRE	Periaxin OS=Danio rerio OX=7955 GN=prx PE=4 SV=1			0	99	TVPESEVSIRPGAQTLDLR				-0.00123677	2067.09	690.039	2067.1	690.039	3	11	1.1.1.3035.19	27.7172	1010.31	500.82	27.27	0.87	2626.44
1	194.25	194.25	79.32	49.37	47.18	tr|A0A2R8QI77|A0A2R8QI77_DANRE	Periaxin OS=Danio rerio OX=7955 GN=prx PE=4 SV=1			0	91	TVPESEVSIRPGAQTLDLR				-0.00123677	2067.09	690.039	2067.1	690.039	3	7	1.1.1.3032.26	27.5456	1010.31	669.3	27.27	0.87	2813.26
1	194.25	194.25	79.32	49.37	47.18	tr|A0A2R8QI77|A0A2R8QI77_DANRE	Periaxin OS=Danio rerio OX=7955 GN=prx PE=4 SV=1			0	99	VDISNEMTER	Oxidation(M)@7			0.000938828	1208.54	605.275	1208.53	605.274	2	12	1.1.1.2835.24	16.2015	250.89	200.63	16.1	0.63	899.38
1	194.25	194.25	79.32	49.37	47.18	tr|A0A2R8QI77|A0A2R8QI77_DANRE	Periaxin OS=Danio rerio OX=7955 GN=prx PE=4 SV=1			0	99	VDISNEMTER	Oxidation(M)@7			0.000938828	1208.54	605.275	1208.53	605.274	2	9	1.1.1.2838.24	16.3713	250.89	167.57	16.1	0.63	676.989
1	194.25	194.25	79.32	49.37	47.18	tr|A0A2R8QI77|A0A2R8QI77_DANRE	Periaxin OS=Danio rerio OX=7955 GN=prx PE=4 SV=1			0	99	VDLDFSLPK				-0.0029045	1032.55	517.28	1032.55	517.282	2	14	1.1.1.3101.7	31.504	769.4	733.09	31.43	1.45	3337.66
1	194.25	194.25	79.32	49.37	47.18	tr|A0A2R8QI77|A0A2R8QI77_DANRE	Periaxin OS=Danio rerio OX=7955 GN=prx PE=4 SV=1			0	99	VDLDFSLPK				-0.0029045	1032.55	517.28	1032.55	517.282	2	13	1.1.1.3105.5	31.7328	769.4	476.22	31.43	1.45	2648.1
1	194.25	194.25	79.32	49.37	47.18	tr|A0A2R8QI77|A0A2R8QI77_DANRE	Periaxin OS=Danio rerio OX=7955 GN=prx PE=4 SV=1			0	99	VDLDFSLPK				-0.0029045	1032.55	517.28	1032.55	517.282	2	10	1.1.1.3114.5	32.2549	769.4	310.54	31.43	1.45	1825.15
1	194.25	194.25	79.32	49.37	47.18	tr|A0A2R8QI77|A0A2R8QI77_DANRE	Periaxin OS=Danio rerio OX=7955 GN=prx PE=4 SV=1			0	99	VDLDFSLPK				-0.0029045	1032.55	517.28	1032.55	517.282	2	11	1.1.1.3099.6	31.3858	769.4	738.64	31.43	1.45	3428.63
1	194.25	194.25	79.32	49.37	47.18	tr|A0A2R8QI77|A0A2R8QI77_DANRE	Periaxin OS=Danio rerio OX=7955 GN=prx PE=4 SV=1			0	99	VDLDFSLPK				-0.0029045	1032.55	517.28	1032.55	517.282	2	10	1.1.1.3097.8	31.273	769.4	581.89	31.43	1.45	3372.05
1	194.25	194.25	79.32	49.37	47.18	tr|A0A2R8QI77|A0A2R8QI77_DANRE	Periaxin OS=Danio rerio OX=7955 GN=prx PE=4 SV=1			0	99	VDLDFSLPK				-0.0029045	1032.55	517.28	1032.55	517.282	2	9	1.1.1.3107.2	31.8438	769.4	349.87	31.43	1.45	2102
1	194.25	194.25	79.32	49.37	47.18	tr|A0A2R8QI77|A0A2R8QI77_DANRE	Periaxin OS=Danio rerio OX=7955 GN=prx PE=4 SV=1			0	99	VDLDFSLPK				-0.0029045	1032.55	517.28	1032.55	517.282	2	8	1.1.1.3111.2	32.0759	769.4	297.76	31.43	1.45	2048.01
1	194.25	194.25	79.32	49.37	47.18	tr|A0A2R8QI77|A0A2R8QI77_DANRE	Periaxin OS=Danio rerio OX=7955 GN=prx PE=4 SV=1			0	99	VDLDFSLPK				-0.0029045	1032.55	517.28	1032.55	517.282	2	8	1.1.1.3095.5	31.1525	769.4	395.67	31.43	1.45	3279.96
1	194.25	194.25	79.32	49.37	47.18	tr|A0A2R8QI77|A0A2R8QI77_DANRE	Periaxin OS=Danio rerio OX=7955 GN=prx PE=4 SV=1			0	85.45	VDLDFSLPK				-0.0029045	1032.55	517.28	1032.55	517.282	2	6	1.1.1.3116.5	32.3709	769.4	272.26	31.43	1.45	1762.47
1	194.25	194.25	79.32	49.37	47.18	tr|A0A2R8QI77|A0A2R8QI77_DANRE	Periaxin OS=Danio rerio OX=7955 GN=prx PE=4 SV=1			0	68.97	VDLDFSLPK				-0.0029045	1032.55	517.28	1032.55	517.282	2	7	1.1.1.3093.5	31.0375	769.4	253.99	31.43	1.45	3587.8
1	194.25	194.25	79.32	49.37	47.18	tr|A0A2R8QI77|A0A2R8QI77_DANRE	Periaxin OS=Danio rerio OX=7955 GN=prx PE=4 SV=1			0	25.27	VDLDFSLPK				-0.0029045	1032.55	517.28	1032.55	517.282	2	7	1.1.1.3096.6	31.2118	769.4	489.95	31.43	1.45	3066.14
1	194.25	194.25	79.32	49.37	47.18	tr|A0A2R8QI77|A0A2R8QI77_DANRE	Periaxin OS=Danio rerio OX=7955 GN=prx PE=4 SV=1			0	99	VDVSLPR				-0.00124007	784.443	393.229	784.444	393.229	2	9	1.1.1.2898.2	19.7739	557.8	455.22	19.66	0.97	4286.05
1	194.25	194.25	79.32	49.37	47.18	tr|A0A2R8QI77|A0A2R8QI77_DANRE	Periaxin OS=Danio rerio OX=7955 GN=prx PE=4 SV=1			0	99	VDVSLPR				-0.00124007	784.443	393.229	784.444	393.229	2	10	1.1.1.2894.2	19.5458	557.8	478.92	19.66	0.97	4731.36
1	194.25	194.25	79.32	49.37	47.18	tr|A0A2R8QI77|A0A2R8QI77_DANRE	Periaxin OS=Danio rerio OX=7955 GN=prx PE=4 SV=1			0	99	VDVSLPR				-0.00124007	784.443	393.229	784.444	393.229	2	9	1.1.1.2900.2	19.8884	557.8	369.15	19.66	0.97	4191.87
1	194.25	194.25	79.32	49.37	47.18	tr|A0A2R8QI77|A0A2R8QI77_DANRE	Periaxin OS=Danio rerio OX=7955 GN=prx PE=4 SV=1			0	98.13	VDVSLPR				-0.00124007	784.443	393.229	784.444	393.229	2	9	1.1.1.2902.3	20.0049	557.8	291.91	19.66	0.97	3834.71
1	194.25	194.25	79.32	49.37	47.18	tr|A0A2R8QI77|A0A2R8QI77_DANRE	Periaxin OS=Danio rerio OX=7955 GN=prx PE=4 SV=1			0	49.05	VDVSLPR				0.010016	784.454	393.234	784.444	393.229	2	7	1.1.1.2925.4	21.3315	320.45	230.19	21.79	1.67	3080.5
1	194.25	194.25	79.32	49.37	47.18	tr|A0A2R8QI77|A0A2R8QI77_DANRE	Periaxin OS=Danio rerio OX=7955 GN=prx PE=4 SV=1			0	99	VEAGVEVQGYSGK				-0.00557657	1321.65	661.83	1321.65	661.833	2	21	1.1.1.2876.30	18.5664	525.72	507.32	18.57	0.92	2030.31
1	194.25	194.25	79.32	49.37	47.18	tr|A0A2R8QI77|A0A2R8QI77_DANRE	Periaxin OS=Danio rerio OX=7955 GN=prx PE=4 SV=1			0	76.59	VEAGVEVQGYSGK				-0.00191445	1321.65	661.832	1321.65	661.833	2	8	1.1.1.2913.26	20.675	202.52	148.29	20.46	0.63	1002.84
1	194.25	194.25	79.32	49.37	47.18	tr|A0A2R8QI77|A0A2R8QI77_DANRE	Periaxin OS=Danio rerio OX=7955 GN=prx PE=4 SV=1			0	17.93	VEAGVEVQGYSGK				-0.00557657	1321.65	661.83	1321.65	661.833	2	6	1.1.1.2887.28	19.1925	525.72	229.26	18.57	0.92	1101.2
1	194.25	194.25	79.32	49.37	47.18	tr|A0A2R8QI77|A0A2R8QI77_DANRE	Periaxin OS=Danio rerio OX=7955 GN=prx PE=4 SV=1			0	99	VNVEGPDFK				-0.00248146	1003.5	502.755	1003.5	502.756	2	13	1.1.1.2883.10	18.9362	1809.65	1737.43	18.98	0.63	8670.97
1	194.25	194.25	79.32	49.37	47.18	tr|A0A2R8QI77|A0A2R8QI77_DANRE	Periaxin OS=Danio rerio OX=7955 GN=prx PE=4 SV=1			0	99	VNVEGPDFK				-0.00248146	1003.5	502.755	1003.5	502.756	2	14	1.1.1.2885.15	19.0578	1809.65	1587.02	18.98	0.63	8300.44
1	194.25	194.25	79.32	49.37	47.18	tr|A0A2R8QI77|A0A2R8QI77_DANRE	Periaxin OS=Danio rerio OX=7955 GN=prx PE=4 SV=1			0	99	VNVEGPDFK				-0.00248146	1003.5	502.755	1003.5	502.756	2	13	1.1.1.2887.11	19.1641	1809.65	1298.57	18.98	0.63	7098.98
1	194.25	194.25	79.32	49.37	47.18	tr|A0A2R8QI77|A0A2R8QI77_DANRE	Periaxin OS=Danio rerio OX=7955 GN=prx PE=4 SV=1			0	99	VNVEGPDFK				-0.00248146	1003.5	502.755	1003.5	502.756	2	13	1.1.1.2889.15	19.2838	1809.65	1129.32	18.98	0.63	5018.9
1	194.25	194.25	79.32	49.37	47.18	tr|A0A2R8QI77|A0A2R8QI77_DANRE	Periaxin OS=Danio rerio OX=7955 GN=prx PE=4 SV=1			0	99	VNVEGPDFK				-0.00248146	1003.5	502.755	1003.5	502.756	2	12	1.1.1.2893.16	19.5123	1809.65	694	18.98	0.63	4296.55
1	194.25	194.25	79.32	49.37	47.18	tr|A0A2R8QI77|A0A2R8QI77_DANRE	Periaxin OS=Danio rerio OX=7955 GN=prx PE=4 SV=1			0	99	VNVEGPDFK				-0.00248146	1003.5	502.755	1003.5	502.756	2	13	1.1.1.2891.16	19.3988	1809.65	884.57	18.98	0.63	4547.7
1	194.25	194.25	79.32	49.37	47.18	tr|A0A2R8QI77|A0A2R8QI77_DANRE	Periaxin OS=Danio rerio OX=7955 GN=prx PE=4 SV=1			0	99	VNVEGPDFK				-0.00248146	1003.5	502.755	1003.5	502.756	2	10	1.1.1.2906.18	20.2591	1809.65	469.61	18.98	0.63	2452.53
1	194.25	194.25	79.32	49.37	47.18	tr|A0A2R8QI77|A0A2R8QI77_DANRE	Periaxin OS=Danio rerio OX=7955 GN=prx PE=4 SV=1			0	99	VNVEGPDFK				-0.00248146	1003.5	502.755	1003.5	502.756	2	11	1.1.1.2899.18	19.8578	1809.65	653.46	18.98	0.63	3404.65
1	194.25	194.25	79.32	49.37	47.18	tr|A0A2R8QI77|A0A2R8QI77_DANRE	Periaxin OS=Danio rerio OX=7955 GN=prx PE=4 SV=1			0	99	VNVEGPDFK				-0.00248146	1003.5	502.755	1003.5	502.756	2	10	1.1.1.2898.17	19.799	1809.65	650.68	18.98	0.63	3121.69
1	194.25	194.25	79.32	49.37	47.18	tr|A0A2R8QI77|A0A2R8QI77_DANRE	Periaxin OS=Danio rerio OX=7955 GN=prx PE=4 SV=1			0	97.91	VNVEGPDFK				-0.00248146	1003.5	502.755	1003.5	502.756	2	9	1.1.1.2904.16	20.1417	1809.65	474.62	18.98	0.63	3672.18
1	194.25	194.25	79.32	49.37	47.18	tr|A0A2R8QI77|A0A2R8QI77_DANRE	Periaxin OS=Danio rerio OX=7955 GN=prx PE=4 SV=1			0	95.44	VNVEGPDFK				-0.00248146	1003.5	502.755	1003.5	502.756	2	8	1.1.1.2895.17	19.6278	1809.65	701.42	18.98	0.63	3122.19
1	194.25	194.25	79.32	49.37	47.18	tr|A0A2R8QI77|A0A2R8QI77_DANRE	Periaxin OS=Danio rerio OX=7955 GN=prx PE=4 SV=1			0	95.41	VNVEGPDFK				-0.00248146	1003.5	502.755	1003.5	502.756	2	9	1.1.1.2912.16	20.6006	1809.65	420.59	18.98	0.63	2707.78
1	194.25	194.25	79.32	49.37	47.18	tr|A0A2R8QI77|A0A2R8QI77_DANRE	Periaxin OS=Danio rerio OX=7955 GN=prx PE=4 SV=1			0	45.55	VNVEGPDFK				0.000171262	1003.5	502.756	1003.5	502.756	2	6	1.1.1.2992.12	25.2126	193.68	165.2	25.02	0.75	1323.36
1	194.25	194.25	79.32	49.37	47.18	tr|A0A2R8QI77|A0A2R8QI77_DANRE	Periaxin OS=Danio rerio OX=7955 GN=prx PE=4 SV=1			0	20.37	VNVEGPDFK				0.000171262	1003.5	502.756	1003.5	502.756	2	6	1.1.1.2994.12	25.3281	193.68	167.69	25.02	0.75	1309.76
1	194.25	194.25	79.32	49.37	47.18	tr|A0A2R8QI77|A0A2R8QI77_DANRE	Periaxin OS=Danio rerio OX=7955 GN=prx PE=4 SV=1			0	99	VNVEGPDIEGGK			cleaved D-V@N-term	0.00304188	1212.6	607.308	1212.6	607.307	2	14	1.1.1.2875.26	18.502	1037.01	984.84	18.46	0.92	3265.66
1	194.25	194.25	79.32	49.37	47.18	tr|A0A2R8QI77|A0A2R8QI77_DANRE	Periaxin OS=Danio rerio OX=7955 GN=prx PE=4 SV=1			0	99	VNVEGPDIEGGK			cleaved D-V@N-term	0.00304188	1212.6	607.308	1212.6	607.307	2	13	1.1.1.2877.27	18.619	1037.01	711.79	18.46	0.92	2388.04
1	194.25	194.25	79.32	49.37	47.18	tr|A0A2R8QI77|A0A2R8QI77_DANRE	Periaxin OS=Danio rerio OX=7955 GN=prx PE=4 SV=1			0	99	VNVEGPDIEGGK			cleaved D-V@N-term	0.00304188	1212.6	607.308	1212.6	607.307	2	13	1.1.1.2879.27	18.7343	1037.01	553.97	18.46	0.92	1973.92
1	194.25	194.25	79.32	49.37	47.18	tr|A0A2R8QI77|A0A2R8QI77_DANRE	Periaxin OS=Danio rerio OX=7955 GN=prx PE=4 SV=1			0	99	VNVEGPDIEGGK			cleaved D-V@N-term	0.00304188	1212.6	607.308	1212.6	607.307	2	10	1.1.1.2884.28	19.023	1037.01	373.45	18.46	0.92	1922.98
1	194.25	194.25	79.32	49.37	47.18	tr|A0A2R8QI77|A0A2R8QI77_DANRE	Periaxin OS=Danio rerio OX=7955 GN=prx PE=4 SV=1			0	99	VNVEGPDIK			cleaved D-V@N-term	0.000159337	969.513	485.764	969.513	485.764	2	12	1.1.1.2859.13	17.5584	2274.5	865.52	17.77	0.58	4048.2
1	194.25	194.25	79.32	49.37	47.18	tr|A0A2R8QI77|A0A2R8QI77_DANRE	Periaxin OS=Danio rerio OX=7955 GN=prx PE=4 SV=1			0	99	VNVEGPDIK			cleaved D-V@N-term	0.000159337	969.513	485.764	969.513	485.764	2	13	1.1.1.2861.19	17.6837	2274.5	1956.19	17.77	0.58	8592.98
1	194.25	194.25	79.32	49.37	47.18	tr|A0A2R8QI77|A0A2R8QI77_DANRE	Periaxin OS=Danio rerio OX=7955 GN=prx PE=4 SV=1			0	99	VNVEGPDIK			cleaved D-V@N-term	0.000159337	969.513	485.764	969.513	485.764	2	13	1.1.1.2863.21	17.8023	2274.5	2217.18	17.77	0.58	9404.12
1	194.25	194.25	79.32	49.37	47.18	tr|A0A2R8QI77|A0A2R8QI77_DANRE	Periaxin OS=Danio rerio OX=7955 GN=prx PE=4 SV=1			0	99	VNVEGPDIK			cleaved D-V@N-term	0.000159337	969.513	485.764	969.513	485.764	2	13	1.1.1.2865.19	17.9141	2274.5	1758.74	17.77	0.58	7930.01
1	194.25	194.25	79.32	49.37	47.18	tr|A0A2R8QI77|A0A2R8QI77_DANRE	Periaxin OS=Danio rerio OX=7955 GN=prx PE=4 SV=1			0	99	VNVEGPDIK			cleaved D-V@N-term	0.000159337	969.513	485.764	969.513	485.764	2	13	1.1.1.2867.15	18.0226	2274.5	1409.49	17.77	0.58	5913.32
1	194.25	194.25	79.32	49.37	47.18	tr|A0A2R8QI77|A0A2R8QI77_DANRE	Periaxin OS=Danio rerio OX=7955 GN=prx PE=4 SV=1			0	99	VNVEGPDIK			cleaved D-V@N-term	0.000159337	969.513	485.764	969.513	485.764	2	14	1.1.1.2869.19	18.1446	2274.5	1148.17	17.77	0.58	5200.77
1	194.25	194.25	79.32	49.37	47.18	tr|A0A2R8QI77|A0A2R8QI77_DANRE	Periaxin OS=Danio rerio OX=7955 GN=prx PE=4 SV=1			0	99	VNVEGPDIK			cleaved D-V@N-term	0.000159337	969.513	485.764	969.513	485.764	2	13	1.1.1.2871.17	18.2566	2274.5	880.42	17.77	0.58	4496.31
1	194.25	194.25	79.32	49.37	47.18	tr|A0A2R8QI77|A0A2R8QI77_DANRE	Periaxin OS=Danio rerio OX=7955 GN=prx PE=4 SV=1			0	99	VNVEGPDIK			cleaved D-V@N-term	0.000159337	969.513	485.764	969.513	485.764	2	13	1.1.1.2873.12	18.3634	2274.5	739.42	17.77	0.58	4433.52
1	194.25	194.25	79.32	49.37	47.18	tr|A0A2R8QI77|A0A2R8QI77_DANRE	Periaxin OS=Danio rerio OX=7955 GN=prx PE=4 SV=1			0	99	VNVEGPDIK			cleaved D-V@N-term	0.000159337	969.513	485.764	969.513	485.764	2	12	1.1.1.2875.14	18.482	2274.5	654.68	17.77	0.58	4335.94
1	194.25	194.25	79.32	49.37	47.18	tr|A0A2R8QI77|A0A2R8QI77_DANRE	Periaxin OS=Danio rerio OX=7955 GN=prx PE=4 SV=1			0	99	VNVEGPDIK			cleaved D-V@N-term	0.000159337	969.513	485.764	969.513	485.764	2	13	1.1.1.2879.14	18.7127	2274.5	536.82	17.77	0.58	3575.7
1	194.25	194.25	79.32	49.37	47.18	tr|A0A2R8QI77|A0A2R8QI77_DANRE	Periaxin OS=Danio rerio OX=7955 GN=prx PE=4 SV=1			0	99	VNVEGPDIK			cleaved D-V@N-term	-0.00222104	969.511	485.763	969.513	485.764	2	9	1.1.1.2901.14	19.9658	305.49	304.31	19.94	0.52	2591.84
1	194.25	194.25	79.32	49.37	47.18	tr|A0A2R8QI77|A0A2R8QI77_DANRE	Periaxin OS=Danio rerio OX=7955 GN=prx PE=4 SV=1			0	99	VNVEGPDIK			cleaved D-V@N-term	-0.00161069	969.511	485.763	969.513	485.764	2	9	1.1.1.2912.13	20.5956	289.38	239.15	20.46	0.69	1985.01
1	194.25	194.25	79.32	49.37	47.18	tr|A0A2R8QI77|A0A2R8QI77_DANRE	Periaxin OS=Danio rerio OX=7955 GN=prx PE=4 SV=1			0	97.45	VNVEGPDIK	Deamidated(N)@2		cleaved D-V@N-term	0.0143761	970.511	486.263	970.497	486.256	2	9	1.1.1.2894.17	19.5708	425.9	297.15	19.32	0.85	2227.27
1	194.25	194.25	79.32	49.37	47.18	tr|A0A2R8QI77|A0A2R8QI77_DANRE	Periaxin OS=Danio rerio OX=7955 GN=prx PE=4 SV=1			0	91.94	VNVEGPDIK			cleaved D-V@N-term	-0.00222104	969.511	485.763	969.513	485.764	2	8	1.1.1.2904.11	20.1334	305.49	232.93	19.94	0.52	2654.2
1	194.25	194.25	79.32	49.37	47.18	tr|A0A2R8QI77|A0A2R8QI77_DANRE	Periaxin OS=Danio rerio OX=7955 GN=prx PE=4 SV=1			0	90.41	VNVEGPDIK			cleaved D-V@N-term	-0.0102769	969.503	485.759	969.513	485.764	2	8	1.1.1.2943.13	22.3856	236.92	146.62	21.9	1.39	1536.15
1	194.25	194.25	79.32	49.37	47.18	tr|A0A2R8QI77|A0A2R8QI77_DANRE	Periaxin OS=Danio rerio OX=7955 GN=prx PE=4 SV=1			0	83.86	VNVEGPDIK	Deamidated(N)@2		cleaved D-V@N-term	0.00955428	970.507	486.261	970.497	486.256	2	9	1.1.1.2898.15	19.7956	332.66	302.6	19.94	0.52	2690.89
1	194.25	194.25	79.32	49.37	47.18	tr|A0A2R8QI77|A0A2R8QI77_DANRE	Periaxin OS=Danio rerio OX=7955 GN=prx PE=4 SV=1			0	72.88	VNVEGPDIK	Deamidated(N)@2		cleaved D-V@N-term	-0.00326313	970.494	486.254	970.497	486.256	2	8	1.1.1.2907.12	20.3061	329.83	325.05	20.34	1.38	2560.8
1	194.25	194.25	79.32	49.37	47.18	tr|A0A2R8QI77|A0A2R8QI77_DANRE	Periaxin OS=Danio rerio OX=7955 GN=prx PE=4 SV=1			0	70.06	VNVEGPDIK			cleaved D-V@N-term	-0.0102769	969.503	485.759	969.513	485.764	2	6	1.1.1.2931.11	21.6895	236.92	204.36	21.9	1.39	1619.6
1	194.25	194.25	79.32	49.37	47.18	tr|A0A2R8QI77|A0A2R8QI77_DANRE	Periaxin OS=Danio rerio OX=7955 GN=prx PE=4 SV=1			0	28.5	VNVEGPDIK	Deamidated(N)@2		cleaved D-V@N-term	0.0143761	970.511	486.263	970.497	486.256	2	6	1.1.1.2890.15	19.3405	425.9	407.16	19.32	0.85	2838.85
1	194.25	194.25	79.32	49.37	47.18	tr|A0A2R8QI77|A0A2R8QI77_DANRE	Periaxin OS=Danio rerio OX=7955 GN=prx PE=4 SV=1			0	99	VNVEGPNIEGGK				0.00109273	1211.62	606.815	1211.61	606.815	2	15	1.1.1.2867.26	18.0409	1136.49	858.42	18.11	0.4	2704.72
1	194.25	194.25	79.32	49.37	47.18	tr|A0A2R8QI77|A0A2R8QI77_DANRE	Periaxin OS=Danio rerio OX=7955 GN=prx PE=4 SV=1			0	99	VNVEGPNIEGGK				0.00109273	1211.62	606.815	1211.61	606.815	2	17	1.1.1.2869.29	18.1612	1136.49	1094.69	18.11	0.4	3792.47
1	194.25	194.25	79.32	49.37	47.18	tr|A0A2R8QI77|A0A2R8QI77_DANRE	Periaxin OS=Danio rerio OX=7955 GN=prx PE=4 SV=1			0	99	VNVEGPNIEGGK				0.00109273	1211.62	606.815	1211.61	606.815	2	17	1.1.1.2871.28	18.2749	1136.49	776.88	18.11	0.4	3151
1	194.25	194.25	79.32	49.37	47.18	tr|A0A2R8QI77|A0A2R8QI77_DANRE	Periaxin OS=Danio rerio OX=7955 GN=prx PE=4 SV=1			0	94.57	VNVEGPNIEGGK				0.00109273	1211.62	606.815	1211.61	606.815	2	15	1.1.1.2873.28	18.39	1136.49	532.72	18.11	0.4	2390.08
1	194.25	194.25	79.32	49.37	47.18	tr|A0A2R8QI77|A0A2R8QI77_DANRE	Periaxin OS=Danio rerio OX=7955 GN=prx PE=4 SV=1			0	43.64	VNVEGPNIEGGK	Deamidated(N)@7			0.00304188	1212.6	607.308	1212.6	607.307	2	17	1.1.1.2873.28	18.39	1037.01	987.82	18.46	0.92	2390.08
1	194.25	194.25	79.32	49.37	47.18	tr|A0A2R8QI77|A0A2R8QI77_DANRE	Periaxin OS=Danio rerio OX=7955 GN=prx PE=4 SV=1			0	43.64	VNVEGPNIEGGK	Deamidated(N)@7			0.00304188	1212.6	607.308	1212.6	607.307	2	14	1.1.1.2875.26	18.502	1037.01	984.84	18.46	0.92	3265.66
1	194.25	194.25	79.32	49.37	47.18	tr|A0A2R8QI77|A0A2R8QI77_DANRE	Periaxin OS=Danio rerio OX=7955 GN=prx PE=4 SV=1			0	43.64	VNVEGPNIEGGK	Deamidated(N)@7			0.00304188	1212.6	607.308	1212.6	607.307	2	13	1.1.1.2877.27	18.619	1037.01	711.79	18.46	0.92	2388.04
1	194.25	194.25	79.32	49.37	47.18	tr|A0A2R8QI77|A0A2R8QI77_DANRE	Periaxin OS=Danio rerio OX=7955 GN=prx PE=4 SV=1			0	43.64	VNVEGPNIEGGK	Deamidated(N)@7			0.00304188	1212.6	607.308	1212.6	607.307	2	13	1.1.1.2879.27	18.7343	1037.01	553.97	18.46	0.92	1973.92
1	194.25	194.25	79.32	49.37	47.18	tr|A0A2R8QI77|A0A2R8QI77_DANRE	Periaxin OS=Danio rerio OX=7955 GN=prx PE=4 SV=1			0	43.64	VNVEGPNIEGGK	Deamidated(N)@7			0.00304188	1212.6	607.308	1212.6	607.307	2	10	1.1.1.2884.28	19.023	1037.01	373.45	18.46	0.92	1922.98
1	194.25	194.25	79.32	49.37	47.18	tr|A0A2R8QI77|A0A2R8QI77_DANRE	Periaxin OS=Danio rerio OX=7955 GN=prx PE=4 SV=1			0	99	VSASGTDINK				0.000909436	990.499	496.257	990.498	496.256	2	16	1.1.1.2805.4	14.4811	321.56	277.26	14.62	1.2	1622.99
1	194.25	194.25	79.32	49.37	47.18	tr|A0A2R8QI77|A0A2R8QI77_DANRE	Periaxin OS=Danio rerio OX=7955 GN=prx PE=4 SV=1			0	99	VSASGTDINK				0.000909436	990.499	496.257	990.498	496.256	2	14	1.1.1.2807.4	14.5755	321.56	301.08	14.62	1.2	1777.6
1	194.25	194.25	79.32	49.37	47.18	tr|A0A2R8QI77|A0A2R8QI77_DANRE	Periaxin OS=Danio rerio OX=7955 GN=prx PE=4 SV=1			0	99	VSASGTDINK				0.000909436	990.499	496.257	990.498	496.256	2	14	1.1.1.2809.6	14.6965	321.56	319.28	14.62	1.2	1373.88
1	194.25	194.25	79.32	49.37	47.18	tr|A0A2R8QI77|A0A2R8QI77_DANRE	Periaxin OS=Danio rerio OX=7955 GN=prx PE=4 SV=1			0	99	VSASGTDINK				0.000909436	990.499	496.257	990.498	496.256	2	15	1.1.1.2811.7	14.8074	321.56	298.05	14.62	1.2	1318.3
1	194.25	194.25	79.32	49.37	47.18	tr|A0A2R8QI77|A0A2R8QI77_DANRE	Periaxin OS=Danio rerio OX=7955 GN=prx PE=4 SV=1			0	99	VSASGTDINK				0.000909436	990.499	496.257	990.498	496.256	2	12	1.1.1.2816.9	15.1068	321.56	190.27	14.62	1.2	1054.65
1	194.25	194.25	79.32	49.37	47.18	tr|A0A2R8QI77|A0A2R8QI77_DANRE	Periaxin OS=Danio rerio OX=7955 GN=prx PE=4 SV=1			0	86.69	VSFFLK				0.001837	739.429	370.722	739.427	370.721	2	7	1.1.1.3008.3	26.1209	286.9	266.49	26.06	1.1	3681.48
1	194.25	194.25	79.32	49.37	47.18	tr|A0A2R8QI77|A0A2R8QI77_DANRE	Periaxin OS=Danio rerio OX=7955 GN=prx PE=4 SV=1			0	81.12	VSFFLK				0.001837	739.429	370.722	739.427	370.721	2	8	1.1.1.3006.2	26.0037	286.9	259.07	26.06	1.1	3163.49
1	194.25	194.25	79.32	49.37	47.18	tr|A0A2R8QI77|A0A2R8QI77_DANRE	Periaxin OS=Danio rerio OX=7955 GN=prx PE=4 SV=1			0	80.43	VSFFLK				0.001837	739.429	370.722	739.427	370.721	2	8	1.1.1.3002.2	25.7729	286.9	243.77	26.06	1.1	3621.3
1	194.25	194.25	79.32	49.37	47.18	tr|A0A2R8QI77|A0A2R8QI77_DANRE	Periaxin OS=Danio rerio OX=7955 GN=prx PE=4 SV=1			0	79.78	VSFFLK				0.001837	739.429	370.722	739.427	370.721	2	7	1.1.1.3004.3	25.89	286.9	264.49	26.06	1.1	3442.03
1	194.25	194.25	79.32	49.37	47.18	tr|A0A2R8QI77|A0A2R8QI77_DANRE	Periaxin OS=Danio rerio OX=7955 GN=prx PE=4 SV=1			0	92.86	VSLPEGK				-0.00166656	728.405	365.21	728.407	365.211	2	7	1.1.1.2834.3	16.1079	478.3	298.81	16.33	1.03	2690.18
1	194.25	194.25	79.32	49.37	47.18	tr|A0A2R8QI77|A0A2R8QI77_DANRE	Periaxin OS=Danio rerio OX=7955 GN=prx PE=4 SV=1			0	87.61	VSLPEGK				-0.00166656	728.405	365.21	728.407	365.211	2	9	1.1.1.2838.2	16.3347	478.3	476.42	16.33	1.03	4608.49
1	194.25	194.25	79.32	49.37	47.18	tr|A0A2R8QI77|A0A2R8QI77_DANRE	Periaxin OS=Danio rerio OX=7955 GN=prx PE=4 SV=1			0	79.78	VSLPEGK				-0.00166656	728.405	365.21	728.407	365.211	2	6	1.1.1.2836.2	16.2204	478.3	409.9	16.33	1.03	3994.71
1	194.25	194.25	79.32	49.37	47.18	tr|A0A2R8QI77|A0A2R8QI77_DANRE	Periaxin OS=Danio rerio OX=7955 GN=prx PE=4 SV=1			0	76.48	VSLPEGK				-0.00166656	728.405	365.21	728.407	365.211	2	8	1.1.1.2842.2	16.5637	478.3	355.72	16.33	1.03	3319.75
1	194.25	194.25	79.32	49.37	47.18	tr|A0A2R8QI77|A0A2R8QI77_DANRE	Periaxin OS=Danio rerio OX=7955 GN=prx PE=4 SV=1			0	44.22	VSLPEGK				-0.00166656	728.405	365.21	728.407	365.211	2	7	1.1.1.2844.3	16.6802	478.3	304.98	16.33	1.03	3196.88
1	194.25	194.25	79.32	49.37	47.18	tr|A0A2R8QI77|A0A2R8QI77_DANRE	Periaxin OS=Danio rerio OX=7955 GN=prx PE=4 SV=1			0	99	VSTGASFK				-0.000774843	795.412	398.713	795.413	398.714	2	7	1.1.1.2818.6	15.2028	216.46	179.64	15.25	0.91	1811.96
1	194.25	194.25	79.32	49.37	47.18	tr|A0A2R8QI77|A0A2R8QI77_DANRE	Periaxin OS=Danio rerio OX=7955 GN=prx PE=4 SV=1			0	99	VYFDNVK				-0.00291077	883.441	442.728	883.444	442.729	2	9	1.1.1.2879.8	18.7027	536.43	412.07	18.8	0.4	5232.37
1	194.25	194.25	79.32	49.37	47.18	tr|A0A2R8QI77|A0A2R8QI77_DANRE	Periaxin OS=Danio rerio OX=7955 GN=prx PE=4 SV=1			0	99	VYFDNVK				-0.00291077	883.441	442.728	883.444	442.729	2	8	1.1.1.2883.7	18.9312	536.43	368.05	18.8	0.4	4003.41
1	194.25	194.25	79.32	49.37	47.18	tr|A0A2R8QI77|A0A2R8QI77_DANRE	Periaxin OS=Danio rerio OX=7955 GN=prx PE=4 SV=1			0	99	VYKPSIDISLPK				0.000681976	1358.78	453.935	1358.78	453.934	3	17	1.1.1.3038.5	27.8574	937.47	884.88	27.96	0.69	3973.52
1	194.25	194.25	79.32	49.37	47.18	tr|A0A2R8QI77|A0A2R8QI77_DANRE	Periaxin OS=Danio rerio OX=7955 GN=prx PE=4 SV=1			0	99	VYKPSIDISLPK				0.000681976	1358.78	453.935	1358.78	453.934	3	13	1.1.1.3040.6	27.9747	937.47	928.45	27.96	0.69	3907.73
1	194.25	194.25	79.32	49.37	47.18	tr|A0A2R8QI77|A0A2R8QI77_DANRE	Periaxin OS=Danio rerio OX=7955 GN=prx PE=4 SV=1			0	99	VYKPSIDISLPK				0.000681976	1358.78	453.935	1358.78	453.934	3	16	1.1.1.3042.5	28.0884	937.47	839.56	27.96	0.69	3547.45
1	194.25	194.25	79.32	49.37	47.18	tr|A0A2R8QI77|A0A2R8QI77_DANRE	Periaxin OS=Danio rerio OX=7955 GN=prx PE=4 SV=1			0	99	VYKPSIDISLPK				0.000681976	1358.78	453.935	1358.78	453.934	3	14	1.1.1.3044.5	28.204	937.47	672.72	27.96	0.69	2956.47
1	194.25	194.25	79.32	49.37	47.18	tr|A0A2R8QI77|A0A2R8QI77_DANRE	Periaxin OS=Danio rerio OX=7955 GN=prx PE=4 SV=1			0	99	VYKPSIDISLPK				0.000681976	1358.78	453.935	1358.78	453.934	3	15	1.1.1.3046.5	28.3195	937.47	523.79	27.96	0.69	2835.55
1	194.25	194.25	79.32	49.37	47.18	tr|A0A2R8QI77|A0A2R8QI77_DANRE	Periaxin OS=Danio rerio OX=7955 GN=prx PE=4 SV=1			0	99	VYKPSIDISLPK				0.000681976	1358.78	453.935	1358.78	453.934	3	12	1.1.1.3048.5	28.4352	937.47	437.5	27.96	0.69	2282.96
1	194.25	194.25	79.32	49.37	47.18	tr|A0A2R8QI77|A0A2R8QI77_DANRE	Periaxin OS=Danio rerio OX=7955 GN=prx PE=4 SV=1			0	99	VYKPSIDISLPK				0.000681976	1358.78	453.935	1358.78	453.934	3	12	1.1.1.3050.5	28.5509	937.47	338.97	27.96	0.69	2213.38
1	194.25	194.25	79.32	49.37	47.18	tr|A0A2R8QI77|A0A2R8QI77_DANRE	Periaxin OS=Danio rerio OX=7955 GN=prx PE=4 SV=1			0	99	VYKPSIDISLPK				0.000681976	1358.78	453.935	1358.78	453.934	3	12	1.1.1.3052.7	28.6697	937.47	324.61	27.96	0.69	1910.84
1	194.25	194.25	79.32	49.37	47.18	tr|A0A2R8QI77|A0A2R8QI77_DANRE	Periaxin OS=Danio rerio OX=7955 GN=prx PE=4 SV=1			0	99	VYKPSIDISLPK				0.000681976	1358.78	453.935	1358.78	453.934	3	10	1.1.1.3054.5	28.782	937.47	253.3	27.96	0.69	1946.93
2	128.04	128.03	56.96	33.03	31.1	tr|F1QM37|F1QM37_DANRE	Acetyl-CoA carboxylase beta OS=Danio rerio OX=7955 GN=acacb PE=1 SV=2			2	99	AIGIGAYLVR				0.000139287	1031.61	516.814	1031.61	516.814	2	11	1.1.1.3077.8	30.1164	1556.32	355.03	30.51	0.81	1912.05
2	128.04	128.03	56.96	33.03	31.1	tr|F1QM37|F1QM37_DANRE	Acetyl-CoA carboxylase beta OS=Danio rerio OX=7955 GN=acacb PE=1 SV=2			2	99	ANAEYIK				-0.00295008	807.41	404.712	807.413	404.714	2	9	1.1.1.2821.5	15.3734	191.81	170.09	15.54	0.68	1803.86
2	128.04	128.03	56.96	33.03	31.1	tr|F1QM37|F1QM37_DANRE	Acetyl-CoA carboxylase beta OS=Danio rerio OX=7955 GN=acacb PE=1 SV=2			2	99	APYDPR				-0.00197881	717.343	359.679	717.345	359.68	2	8	1.1.1.2829.2	15.8221	323.8	269.28	15.93	0.57	3231.57
2	128.04	128.03	56.96	33.03	31.1	tr|F1QM37|F1QM37_DANRE	Acetyl-CoA carboxylase beta OS=Danio rerio OX=7955 GN=acacb PE=1 SV=2			2	99	DFTVASPAEFVTR				-0.0016338	1438.71	720.361	1438.71	720.362	2	14	1.1.1.3102.25	31.592	1554.22	812.22	31.84	0.87	3248.57
2	128.04	128.03	56.96	33.03	31.1	tr|F1QM37|F1QM37_DANRE	Acetyl-CoA carboxylase beta OS=Danio rerio OX=7955 GN=acacb PE=1 SV=2			2	99	DMYDQVLK				0.00814889	1010.48	506.248	1010.47	506.244	2	9	1.1.1.2954.12	23.0184	378.52	331.84	22.94	0.52	1958.73
2	128.04	128.03	56.96	33.03	31.1	tr|F1QM37|F1QM37_DANRE	Acetyl-CoA carboxylase beta OS=Danio rerio OX=7955 GN=acacb PE=1 SV=2			2	99	DVDEGLASAEK				0.00524158	1132.53	567.272	1132.52	567.27	2	12	1.1.1.2868.26	18.0986	435.35	249.54	17.54	1.33	1235.47
2	128.04	128.03	56.96	33.03	31.1	tr|F1QM37|F1QM37_DANRE	Acetyl-CoA carboxylase beta OS=Danio rerio OX=7955 GN=acacb PE=1 SV=2			2	99	EASFEYLQNEGER				0.00356838	1570.69	786.354	1570.69	786.352	2	18	2.1.1.2993.31	24.1743	483.44	422.97	24.24	1.27	1665.19
2	128.04	128.03	56.96	33.03	31.1	tr|F1QM37|F1QM37_DANRE	Acetyl-CoA carboxylase beta OS=Danio rerio OX=7955 GN=acacb PE=1 SV=2			2	99	EEAISNMVVAMK	Oxidation(M)@7; Oxidation(M)@11			0.00553699	1352.64	677.326	1352.63	677.323	2	17	1.1.1.2863.30	17.8173	333.11	330.89	17.82	0.46	1342.85
2	128.04	128.03	56.96	33.03	31.1	tr|F1QM37|F1QM37_DANRE	Acetyl-CoA carboxylase beta OS=Danio rerio OX=7955 GN=acacb PE=1 SV=2			2	99	EEGIGVENLR				0.0047602	1114.57	558.291	1114.56	558.288	2	12	1.1.1.2909.19	20.4326	1309.21	930.08	20.57	1.04	3921.74
2	128.04	128.03	56.96	33.03	31.1	tr|F1QM37|F1QM37_DANRE	Acetyl-CoA carboxylase beta OS=Danio rerio OX=7955 GN=acacb PE=1 SV=2			2	99	EFSQPVLVYIPPNAELR				-0.00763554	1971.04	658.02	1971.05	658.023	3	15	1.1.1.3212.8	37.934	448.95	370.56	37.8	1.21	1872.08
2	128.04	128.03	56.96	33.03	31.1	tr|F1QM37|F1QM37_DANRE	Acetyl-CoA carboxylase beta OS=Danio rerio OX=7955 GN=acacb PE=1 SV=2			2	99	EIDFVPTK				0.00266042	947.499	474.757	947.496	474.755	2	9	1.1.1.2931.9	21.6862	1074.72	999.5	21.79	0.81	5378.77
2	128.04	128.03	56.96	33.03	31.1	tr|F1QM37|F1QM37_DANRE	Acetyl-CoA carboxylase beta OS=Danio rerio OX=7955 GN=acacb PE=1 SV=2			2	99	EIMQANQDLSNGHIQSMLR				0.00261881	2184.04	729.022	2184.04	729.021	3	15	1.1.1.3046.19	28.3495	440.48	433.74	28.43	0.52	2691.58
2	128.04	128.03	56.96	33.03	31.1	tr|F1QM37|F1QM37_DANRE	Acetyl-CoA carboxylase beta OS=Danio rerio OX=7955 GN=acacb PE=1 SV=2			2	99	ENPIHIINVSIK				-0.00142273	1375.78	459.601	1375.78	459.601	3	12	1.1.1.3046.6	28.3212	829.44	767.66	28.37	0.75	3458.62
2	128.04	128.03	56.96	33.03	31.1	tr|F1QM37|F1QM37_DANRE	Acetyl-CoA carboxylase beta OS=Danio rerio OX=7955 GN=acacb PE=1 SV=2			2	99	ESMSDFLHSLER				0.0018981	1449.66	484.226	1449.66	484.226	3	12	1.1.1.3228.4	38.8561	540.69	322.31	38.5	0.81	1440.97
2	128.04	128.03	56.96	33.03	31.1	tr|F1QM37|F1QM37_DANRE	Acetyl-CoA carboxylase beta OS=Danio rerio OX=7955 GN=acacb PE=1 SV=2			2	99	FGSYIVDALR				-0.00350177	1139.59	570.804	1139.6	570.806	2	15	1.1.1.3085.11	30.5841	1471.83	705.88	30.85	0.81	2411.43
2	128.04	128.03	56.96	33.03	31.1	tr|F1QM37|F1QM37_DANRE	Acetyl-CoA carboxylase beta OS=Danio rerio OX=7955 GN=acacb PE=1 SV=2			2	99	FVVMVTPEDLK				-0.00789083	1276.67	639.34	1276.67	639.344	2	13	1.1.1.3128.11	33.0925	387.23	319.26	33.23	0.75	2077.18
2	128.04	128.03	56.96	33.03	31.1	tr|F1QM37|F1QM37_DANRE	Acetyl-CoA carboxylase beta OS=Danio rerio OX=7955 GN=acacb PE=1 SV=2			2	99	GGVLEAEGTVEIK				-0.0104237	1300.68	651.346	1300.69	651.351	2	10	1.1.1.3043.17	28.1695	279.8	264.56	28.2	1.21	1438.68
2	128.04	128.03	56.96	33.03	31.1	tr|F1QM37|F1QM37_DANRE	Acetyl-CoA carboxylase beta OS=Danio rerio OX=7955 GN=acacb PE=1 SV=2			2	99	GSGTIAGETSQAYK				-0.000788821	1368.65	685.333	1368.65	685.333	2	19	1.1.1.2850.30	17.0695	1248.22	866.1	16.96	0.34	3110.34
2	128.04	128.03	56.96	33.03	31.1	tr|F1QM37|F1QM37_DANRE	Acetyl-CoA carboxylase beta OS=Danio rerio OX=7955 GN=acacb PE=1 SV=2			2	99	HMFQVAWIDPEDPYK	Oxidation(M)@2			-0.00470825	1890.86	631.293	1890.86	631.294	3	10	1.1.1.3137.8	33.5925	252.13	233.57	33.52	1.62	1556.71
2	128.04	128.03	56.96	33.03	31.1	tr|F1QM37|F1QM37_DANRE	Acetyl-CoA carboxylase beta OS=Danio rerio OX=7955 GN=acacb PE=1 SV=2			2	99	IANILDSHAATLQR				-0.00189592	1521.82	508.282	1521.83	508.283	3	13	1.1.1.2958.12	23.2492	1415.18	537.35	23.46	0.58	3424.93
2	128.04	128.03	56.96	33.03	31.1	tr|F1QM37|F1QM37_DANRE	Acetyl-CoA carboxylase beta OS=Danio rerio OX=7955 GN=acacb PE=1 SV=2			2	99	IGLAEEIR				-0.00233064	899.505	450.76	899.508	450.761	2	13	1.1.1.2916.9	20.8199	1254.91	516.18	21.09	0.64	4966.92
2	128.04	128.03	56.96	33.03	31.1	tr|F1QM37|F1QM37_DANRE	Acetyl-CoA carboxylase beta OS=Danio rerio OX=7955 GN=acacb PE=1 SV=2			2	99	IGYPVVIK				0.000236332	887.548	444.781	887.548	444.781	2	12	1.1.1.2969.8	23.8773	840.03	741.81	23.8	0.58	5834.28
2	128.04	128.03	56.96	33.03	31.1	tr|F1QM37|F1QM37_DANRE	Acetyl-CoA carboxylase beta OS=Danio rerio OX=7955 GN=acacb PE=1 SV=2			2	99	ITSENPDEGFKPSSGTVQELNFR				-0.000872176	2551.22	851.413	2551.22	851.414	3	23	1.1.1.3060.29	29.1718	2108.58	605.24	28.43	0.52	2261.1
2	128.04	128.03	56.96	33.03	31.1	tr|F1QM37|F1QM37_DANRE	Acetyl-CoA carboxylase beta OS=Danio rerio OX=7955 GN=acacb PE=1 SV=2			2	99	IYISANSGAR				-0.00389832	1050.54	526.278	1050.55	526.28	2	13	1.1.1.2853.22	17.2273	995.87	952.37	17.25	0.86	4154.68
2	128.04	128.03	56.96	33.03	31.1	tr|F1QM37|F1QM37_DANRE	Acetyl-CoA carboxylase beta OS=Danio rerio OX=7955 GN=acacb PE=1 SV=2			2	99	KVESSEDFPSLFR			missed K-V@1	0.00090801	1539.76	514.26	1539.76	514.26	3	11	1.1.1.3056.7	28.901	355.24	329.93	28.95	1.97	2239.97
2	128.04	128.03	56.96	33.03	31.1	tr|F1QM37|F1QM37_DANRE	Acetyl-CoA carboxylase beta OS=Danio rerio OX=7955 GN=acacb PE=1 SV=2			2	99	LAEQLGKPDLPSQER				-0.000922879	1679.88	560.968	1679.88	560.969	3	16	1.1.1.2918.24	20.9605	1706.24	760.49	20.58	0.46	4411.14
2	128.04	128.03	56.96	33.03	31.1	tr|F1QM37|F1QM37_DANRE	Acetyl-CoA carboxylase beta OS=Danio rerio OX=7955 GN=acacb PE=1 SV=2			2	99	LGGIPLGVIAVETR				-0.00106666	1393.83	697.921	1393.83	697.922	2	17	1.1.1.3169.7	35.443	1572.41	522.09	35.78	0.75	2766.97
2	128.04	128.03	56.96	33.03	31.1	tr|F1QM37|F1QM37_DANRE	Acetyl-CoA carboxylase beta OS=Danio rerio OX=7955 GN=acacb PE=1 SV=2			2	99	LHQVFHNVLENLVK				-0.00274781	1688.93	563.985	1688.94	563.986	3	10	1.1.1.3108.11	31.9168	357.81	343.46	31.78	1.28	2080.91
2	128.04	128.03	56.96	33.03	31.1	tr|F1QM37|F1QM37_DANRE	Acetyl-CoA carboxylase beta OS=Danio rerio OX=7955 GN=acacb PE=1 SV=2			2	99	LLETESFR				-0.00100466	993.512	497.763	993.513	497.764	2	12	1.1.1.2904.14	20.1384	1444.56	1439.31	20.17	0.8	8035.29
2	128.04	128.03	56.96	33.03	31.1	tr|F1QM37|F1QM37_DANRE	Acetyl-CoA carboxylase beta OS=Danio rerio OX=7955 GN=acacb PE=1 SV=2			2	99	LLLEEVVK				-0.000899987	941.579	471.797	941.58	471.797	2	12	1.1.1.3017.9	26.6508	1114.5	1000.3	26.52	0.87	4481.91
2	128.04	128.03	56.96	33.03	31.1	tr|F1QM37|F1QM37_DANRE	Acetyl-CoA carboxylase beta OS=Danio rerio OX=7955 GN=acacb PE=1 SV=2			2	99	LLQQAGQVWFPDSAYK				0.00456106	1849.94	925.978	1849.94	925.975	2	23	1.1.1.3141.25	33.856	479.43	461.92	33.81	1.04	2403.18
2	128.04	128.03	56.96	33.03	31.1	tr|F1QM37|F1QM37_DANRE	Acetyl-CoA carboxylase beta OS=Danio rerio OX=7955 GN=acacb PE=1 SV=2			2	99	LPGDNEVGMVAFR	Oxidation(M)@9			0.00335073	1419.69	710.85	1419.68	710.848	2	14	1.1.1.2991.28	25.1816	836.35	829.07	25.31	0.92	2864.84
2	128.04	128.03	56.96	33.03	31.1	tr|F1QM37|F1QM37_DANRE	Acetyl-CoA carboxylase beta OS=Danio rerio OX=7955 GN=acacb PE=1 SV=2			2	99	LTLPVNDSGEFPAMR				0.00154431	1645.81	823.915	1645.81	823.914	2	17	1.1.1.3123.21	32.8066	658.26	537.01	32.65	1.16	3576.31
2	128.04	128.03	56.96	33.03	31.1	tr|F1QM37|F1QM37_DANRE	Acetyl-CoA carboxylase beta OS=Danio rerio OX=7955 GN=acacb PE=1 SV=2			2	99	LTTTGDVIPIR				0.00130181	1184.68	593.346	1184.68	593.346	2	16	1.1.1.2967.23	23.7867	2053	1692.36	23.63	0.98	5285.95
2	128.04	128.03	56.96	33.03	31.1	tr|F1QM37|F1QM37_DANRE	Acetyl-CoA carboxylase beta OS=Danio rerio OX=7955 GN=acacb PE=1 SV=2			2	99	LWGPGDSYPK				0.00473667	1118.54	560.279	1118.54	560.277	2	12	1.1.1.2958.20	23.2625	795.05	785.22	23.17	1.56	2663.08
2	128.04	128.03	56.96	33.03	31.1	tr|F1QM37|F1QM37_DANRE	Acetyl-CoA carboxylase beta OS=Danio rerio OX=7955 GN=acacb PE=1 SV=2			2	99	MQLYLGAAR	Oxidation(M)@1			-0.00337468	1037.53	519.772	1037.53	519.774	2	11	1.1.1.2901.20	19.9758	552.23	548.51	20	0.8	2681.63
2	128.04	128.03	56.96	33.03	31.1	tr|F1QM37|F1QM37_DANRE	Acetyl-CoA carboxylase beta OS=Danio rerio OX=7955 GN=acacb PE=1 SV=2			2	99	QADTEDDDALVTAFTAFAHSK				0.0053189	2252.03	751.683	2252.02	751.682	3	14	1.1.1.3342.4	45.4515	299.69	144.7	43.98	2.02	2082.69
2	128.04	128.03	56.96	33.03	31.1	tr|F1QM37|F1QM37_DANRE	Acetyl-CoA carboxylase beta OS=Danio rerio OX=7955 GN=acacb PE=1 SV=2			2	99	QVLIASHLPSYELR				-0.00085307	1624.89	542.638	1624.89	542.638	3	12	1.1.1.3069.9	29.6554	1624.65	597.05	29.18	0.58	2427.93
2	128.04	128.03	56.96	33.03	31.1	tr|F1QM37|F1QM37_DANRE	Acetyl-CoA carboxylase beta OS=Danio rerio OX=7955 GN=acacb PE=1 SV=2			2	99	QVQAEVPGSPIFIMQLAEHAR				-0.00567096	2320.19	774.405	2320.2	774.407	3	20	1.1.1.3356.2	46.2508	884.32	244.09	44.56	1.21	2466.8
2	128.04	128.03	56.96	33.03	31.1	tr|F1QM37|F1QM37_DANRE	Acetyl-CoA carboxylase beta OS=Danio rerio OX=7955 GN=acacb PE=1 SV=2			2	99	SLLYDYGIR				0.000313697	1098.57	550.293	1098.57	550.293	2	11	1.1.1.3052.14	28.6813	1454.37	905.27	28.37	1.1	4464.71
2	128.04	128.03	56.96	33.03	31.1	tr|F1QM37|F1QM37_DANRE	Acetyl-CoA carboxylase beta OS=Danio rerio OX=7955 GN=acacb PE=1 SV=2			2	99	SNQSPVPIKPATDPVDR				-0.00375341	1819.94	607.654	1819.94	607.655	3	16	1.1.1.2901.29	19.9908	1820.28	1117.07	20.17	0.4	4894.24
2	128.04	128.03	56.96	33.03	31.1	tr|F1QM37|F1QM37_DANRE	Acetyl-CoA carboxylase beta OS=Danio rerio OX=7955 GN=acacb PE=1 SV=2			2	99	SREEFLLPIYHQVAVQFVDLHDTPGR			missed R-E@2	-0.00149548	3065.57	767.4	3065.57	767.4	4	18	1.1.1.3338.3	45.219	470.43	276.3	44.44	1.38	2362.34
2	128.04	128.03	56.96	33.03	31.1	tr|F1QM37|F1QM37_DANRE	Acetyl-CoA carboxylase beta OS=Danio rerio OX=7955 GN=acacb PE=1 SV=2			2	99	SVVLDLLK				-0.00274988	885.551	443.783	885.554	443.784	2	10	1.1.1.3091.5	30.9222	502.19	301.16	30.39	1.27	2853.45
2	128.04	128.03	56.96	33.03	31.1	tr|F1QM37|F1QM37_DANRE	Acetyl-CoA carboxylase beta OS=Danio rerio OX=7955 GN=acacb PE=1 SV=2			2	99	TAQAIEDFNR				-0.00488204	1163.55	582.783	1163.56	582.786	2	13	1.1.1.2900.21	19.9201	1401.5	663.74	19.32	0.85	2492.02
2	128.04	128.03	56.96	33.03	31.1	tr|F1QM37|F1QM37_DANRE	Acetyl-CoA carboxylase beta OS=Danio rerio OX=7955 GN=acacb PE=1 SV=2			2	99	TLRDPSLPLLELQEIMTSVAGR			missed R-D@3	0.00274536	2438.32	813.782	2438.32	813.781	3	28	1.1.1.3508.2	54.6566	438.25	424.9	54.82	1.25	1486.21
2	128.04	128.03	56.96	33.03	31.1	tr|F1QM37|F1QM37_DANRE	Acetyl-CoA carboxylase beta OS=Danio rerio OX=7955 GN=acacb PE=1 SV=2			2	99	TPEYPEGR				0.000355861	947.435	474.725	947.435	474.725	2	11	1.1.1.2829.11	15.837	952.2	922.93	15.82	0.68	4414.74
2	128.04	128.03	56.96	33.03	31.1	tr|F1QM37|F1QM37_DANRE	Acetyl-CoA carboxylase beta OS=Danio rerio OX=7955 GN=acacb PE=1 SV=2			2	99	TTVEYLIK				0.000258676	965.544	483.779	965.543	483.779	2	11	1.1.1.2938.13	22.0971	1190.3	800.83	22.31	0.92	3418.13
2	128.04	128.03	56.96	33.03	31.1	tr|F1QM37|F1QM37_DANRE	Acetyl-CoA carboxylase beta OS=Danio rerio OX=7955 GN=acacb PE=1 SV=2			2	99	TVELAIPADPANLDSEAK				-0.000842112	1852.94	927.478	1852.94	927.478	2	13	1.1.1.3109.24	32.0048	1380.84	352.52	30.91	0.64	1983.46
2	128.04	128.03	56.96	33.03	31.1	tr|F1QM37|F1QM37_DANRE	Acetyl-CoA carboxylase beta OS=Danio rerio OX=7955 GN=acacb PE=1 SV=2			2	99	VEEGAEVTDYR				0.00106551	1266.57	634.294	1266.57	634.294	2	17	1.1.1.2868.29	18.1036	1218.45	616.14	17.88	0.46	2143.58
2	128.04	128.03	56.96	33.03	31.1	tr|F1QM37|F1QM37_DANRE	Acetyl-CoA carboxylase beta OS=Danio rerio OX=7955 GN=acacb PE=1 SV=2			2	99	VESSEDFPSLFR				0.0147777	1411.68	706.846	1411.66	706.838	2	11	1.1.1.3151.15	34.4146	246.78	242.25	34.5	0.46	1388.16
2	128.04	128.03	56.96	33.03	31.1	tr|F1QM37|F1QM37_DANRE	Acetyl-CoA carboxylase beta OS=Danio rerio OX=7955 GN=acacb PE=1 SV=2			2	99	VIQVENSHIILTGAGALNK				0.00274899	1976.11	659.71	1976.11	659.709	3	28	1.1.1.3059.14	29.094	1915.16	1672.64	29.18	0.58	5656.15
2	128.04	128.03	56.96	33.03	31.1	tr|F1QM37|F1QM37_DANRE	Acetyl-CoA carboxylase beta OS=Danio rerio OX=7955 GN=acacb PE=1 SV=2			2	99	VLIANNGIAAVK				-0.00184736	1181.71	591.863	1181.71	591.864	2	13	1.1.1.2952.28	22.9297	1756.82	359.2	22.13	0.63	2297.76
2	128.04	128.03	56.96	33.03	31.1	tr|F1QM37|F1QM37_DANRE	Acetyl-CoA carboxylase beta OS=Danio rerio OX=7955 GN=acacb PE=1 SV=2			2	99	VLQAELK				-0.00406098	799.476	400.745	799.48	400.747	2	11	1.1.1.2846.9	16.8053	755.53	655.6	16.91	0.98	7189.36
2	128.04	128.03	56.96	33.03	31.1	tr|F1QM37|F1QM37_DANRE	Acetyl-CoA carboxylase beta OS=Danio rerio OX=7955 GN=acacb PE=1 SV=2			2	99	VTFLVAQK				-0.00415492	904.534	453.274	904.538	453.276	2	12	1.1.1.2927.6	21.4502	848.28	713.2	21.27	1.27	4859.57
2	128.04	128.03	56.96	33.03	31.1	tr|F1QM37|F1QM37_DANRE	Acetyl-CoA carboxylase beta OS=Danio rerio OX=7955 GN=acacb PE=1 SV=2			2	99	WFVETEGAVK				-0.0110258	1164.57	583.293	1164.58	583.298	2	11	1.1.1.2987.19	24.9356	627.77	613.82	24.73	1.16	3922.73
2	128.04	128.03	56.96	33.03	31.1	tr|F1QM37|F1QM37_DANRE	Acetyl-CoA carboxylase beta OS=Danio rerio OX=7955 GN=acacb PE=1 SV=2			2	99	WSYEMFR				0.00118951	1017.44	509.727	1017.44	509.726	2	8	1.1.1.3078.8	30.1742	329.72	279.47	30.28	0.98	1534.9
2	128.04	128.03	56.96	33.03	31.1	tr|F1QM37|F1QM37_DANRE	Acetyl-CoA carboxylase beta OS=Danio rerio OX=7955 GN=acacb PE=1 SV=2			2	99	YILTDIIGK				-0.00329712	1034.6	518.306	1034.6	518.308	2	13	1.1.1.3094.8	31.1	1119.82	836.52	31.26	0.81	3572.8
2	128.04	128.03	56.96	33.03	31.1	tr|F1QM37|F1QM37_DANRE	Acetyl-CoA carboxylase beta OS=Danio rerio OX=7955 GN=acacb PE=1 SV=2			2	99	YILTDIIGKEEGIGVENLR			missed K-E@9	0.0111669	2131.16	711.395	2131.15	711.391	3	17	2.1.1.3258.4	39.451	226.31	173.25	39.21	0.98	1541.33
2	128.04	128.03	56.96	33.03	31.1	tr|F1QM37|F1QM37_DANRE	Acetyl-CoA carboxylase beta OS=Danio rerio OX=7955 GN=acacb PE=1 SV=2			2	99	YLYLTPQDYTR				0.00317439	1431.71	716.861	1431.7	716.859	2	13	1.1.1.3044.22	28.2374	1598.69	859.47	28.48	0.69	3384.98
2	128.04	128.03	56.96	33.03	31.1	tr|F1QM37|F1QM37_DANRE	Acetyl-CoA carboxylase beta OS=Danio rerio OX=7955 GN=acacb PE=1 SV=2			1.82391	98.8	LPELLHK				-0.00056758	848.511	425.263	848.512	425.263	2	11	1.1.1.2888.8	19.2157	364.93	364.92	19.31	1.02	4152.39
2	128.04	128.03	56.96	33.03	31.1	tr|F1QM37|F1QM37_DANRE	Acetyl-CoA carboxylase beta OS=Danio rerio OX=7955 GN=acacb PE=1 SV=2			1.5376	97.46	YFTFR				0.00217392	732.362	367.188	732.359	367.187	2	6	1.1.1.2947.2	22.5979	383.96	353.87	22.54	0.92	3349.09
2	128.04	128.03	56.96	33.03	31.1	tr|F1QM37|F1QM37_DANRE	Acetyl-CoA carboxylase beta OS=Danio rerio OX=7955 GN=acacb PE=1 SV=2			1.33724	96.35	AYLWDNNK				-0.00350287	1022.48	512.247	1022.48	512.248	2	8	1.1.1.2953.14	22.9641	379.01	358.64	23.23	0.75	2048.82
2	128.04	128.03	56.96	33.03	31.1	tr|F1QM37|F1QM37_DANRE	Acetyl-CoA carboxylase beta OS=Danio rerio OX=7955 GN=acacb PE=1 SV=2			1.25181	95.51	HYLQVEMQFQQAHYDK	Oxidation(M)@7			0.000797709	2079.95	694.323	2079.95	694.323	3	9	1.1.1.2972.28	24.0843	260.99	194.2	23.75	1.15	1327.96
2	128.04	128.03	56.96	33.03	31.1	tr|F1QM37|F1QM37_DANRE	Acetyl-CoA carboxylase beta OS=Danio rerio OX=7955 GN=acacb PE=1 SV=2			1.12494	92.6	RIDPVYSR			missed R-I@1	-0.00224236	1004.54	503.276	1004.54	503.277	2	9	2.1.1.2860.12	16.4898	251.3	231.45	16.52	0.97	1980.56
2	128.04	128.03	56.96	33.03	31.1	tr|F1QM37|F1QM37_DANRE	Acetyl-CoA carboxylase beta OS=Danio rerio OX=7955 GN=acacb PE=1 SV=2			0.8041	84.54	IDPVYSR				-0.00860727	848.431	425.223	848.439	425.227	2	6	1.1.1.2845.11	16.751	486.64	360.74	16.9	1.44	3570.91
2	128.04	128.03	56.96	33.03	31.1	tr|F1QM37|F1QM37_DANRE	Acetyl-CoA carboxylase beta OS=Danio rerio OX=7955 GN=acacb PE=1 SV=2			0.787812	85.45	IPVTVEK				-0.00173393	784.468	393.241	784.469	393.242	2	10	1.1.1.2838.5	16.3397	852.27	851.46	16.39	0.57	8509.79
2	128.04	128.03	56.96	33.03	31.1	tr|F1QM37|F1QM37_DANRE	Acetyl-CoA carboxylase beta OS=Danio rerio OX=7955 GN=acacb PE=1 SV=2			0.489455	71.52	EPNATVSQHMPK				-0.00411164	1337.64	446.886	1337.64	446.887	3	9	1.1.1.2844.13	16.6968	168.35	159.32	16.68	0.52	3650.48
2	128.04	128.03	56.96	33.03	31.1	tr|F1QM37|F1QM37_DANRE	Acetyl-CoA carboxylase beta OS=Danio rerio OX=7955 GN=acacb PE=1 SV=2			0.350665	61.6	RLLLEEVVK			missed R-L@1	-0.00509139	1097.68	549.845	1097.68	549.848	2	7	1.1.1.2989.15	25.0444	352.13	331.14	25.02	1.1	2421.75
2	128.04	128.03	56.96	33.03	31.1	tr|F1QM37|F1QM37_DANRE	Acetyl-CoA carboxylase beta OS=Danio rerio OX=7955 GN=acacb PE=1 SV=2			0.303644	62.21	EVNDPSSGQIMFQSYGDK	Oxidation(M)@11			0.00703713	2016.88	673.301	2016.87	673.298	3	9	1.1.1.2969.27	23.909	129.49	115.14	23.81	0.29	2805.27
2	128.04	128.03	56.96	33.03	31.1	tr|F1QM37|F1QM37_DANRE	Acetyl-CoA carboxylase beta OS=Danio rerio OX=7955 GN=acacb PE=1 SV=2			0.123782	29.58	NWVDTLMK				-0.000763771	1005.49	503.755	1005.5	503.755	2	6	1.1.1.3088.7	30.751	388.94	374.01	30.8	1.45	1810.06
2	128.04	128.03	56.96	33.03	31.1	tr|F1QM37|F1QM37_DANRE	Acetyl-CoA carboxylase beta OS=Danio rerio OX=7955 GN=acacb PE=1 SV=2			0	99	AIGIGAYLVR				0.000139287	1031.61	516.814	1031.61	516.814	2	14	1.1.1.3079.8	30.2337	1556.32	759.68	30.51	0.81	3604.43
2	128.04	128.03	56.96	33.03	31.1	tr|F1QM37|F1QM37_DANRE	Acetyl-CoA carboxylase beta OS=Danio rerio OX=7955 GN=acacb PE=1 SV=2			0	99	AIGIGAYLVR				0.000139287	1031.61	516.814	1031.61	516.814	2	15	1.1.1.3081.8	30.3475	1556.32	1240.02	30.51	0.81	5110.39
2	128.04	128.03	56.96	33.03	31.1	tr|F1QM37|F1QM37_DANRE	Acetyl-CoA carboxylase beta OS=Danio rerio OX=7955 GN=acacb PE=1 SV=2			0	99	AIGIGAYLVR				0.000139287	1031.61	516.814	1031.61	516.814	2	16	1.1.1.3083.11	30.4684	1556.32	1522.6	30.51	0.81	4733.15
2	128.04	128.03	56.96	33.03	31.1	tr|F1QM37|F1QM37_DANRE	Acetyl-CoA carboxylase beta OS=Danio rerio OX=7955 GN=acacb PE=1 SV=2			0	99	AIGIGAYLVR				0.000139287	1031.61	516.814	1031.61	516.814	2	16	1.1.1.3085.6	30.5757	1556.32	1470.33	30.51	0.81	5724.33
2	128.04	128.03	56.96	33.03	31.1	tr|F1QM37|F1QM37_DANRE	Acetyl-CoA carboxylase beta OS=Danio rerio OX=7955 GN=acacb PE=1 SV=2			0	99	AIGIGAYLVR				0.000139287	1031.61	516.814	1031.61	516.814	2	17	1.1.1.3087.7	30.693	1556.32	1271.47	30.51	0.81	5481.11
2	128.04	128.03	56.96	33.03	31.1	tr|F1QM37|F1QM37_DANRE	Acetyl-CoA carboxylase beta OS=Danio rerio OX=7955 GN=acacb PE=1 SV=2			0	99	AIGIGAYLVR				0.000139287	1031.61	516.814	1031.61	516.814	2	17	1.1.1.3089.10	30.8142	1556.32	1003.46	30.51	0.81	3590.01
2	128.04	128.03	56.96	33.03	31.1	tr|F1QM37|F1QM37_DANRE	Acetyl-CoA carboxylase beta OS=Danio rerio OX=7955 GN=acacb PE=1 SV=2			0	99	AIGIGAYLVR				0.000139287	1031.61	516.814	1031.61	516.814	2	16	1.1.1.3091.8	30.9272	1556.32	768.04	30.51	0.81	3845.25
2	128.04	128.03	56.96	33.03	31.1	tr|F1QM37|F1QM37_DANRE	Acetyl-CoA carboxylase beta OS=Danio rerio OX=7955 GN=acacb PE=1 SV=2			0	99	AIGIGAYLVR				0.000139287	1031.61	516.814	1031.61	516.814	2	15	1.1.1.3093.5	31.0375	1556.32	692.92	30.51	0.81	3587.8
2	128.04	128.03	56.96	33.03	31.1	tr|F1QM37|F1QM37_DANRE	Acetyl-CoA carboxylase beta OS=Danio rerio OX=7955 GN=acacb PE=1 SV=2			0	99	AIGIGAYLVR				0.000139287	1031.61	516.814	1031.61	516.814	2	15	1.1.1.3095.5	31.1525	1556.32	640.28	30.51	0.81	3279.96
2	128.04	128.03	56.96	33.03	31.1	tr|F1QM37|F1QM37_DANRE	Acetyl-CoA carboxylase beta OS=Danio rerio OX=7955 GN=acacb PE=1 SV=2			0	99	AIGIGAYLVR				0.000139287	1031.61	516.814	1031.61	516.814	2	13	1.1.1.3097.8	31.273	1556.32	561.96	30.51	0.81	3372.05
2	128.04	128.03	56.96	33.03	31.1	tr|F1QM37|F1QM37_DANRE	Acetyl-CoA carboxylase beta OS=Danio rerio OX=7955 GN=acacb PE=1 SV=2			0	99	AIGIGAYLVR				0.000139287	1031.61	516.814	1031.61	516.814	2	10	1.1.1.3099.6	31.3858	1556.32	478.29	30.51	0.81	3428.63
2	128.04	128.03	56.96	33.03	31.1	tr|F1QM37|F1QM37_DANRE	Acetyl-CoA carboxylase beta OS=Danio rerio OX=7955 GN=acacb PE=1 SV=2			0	99	AIGIGAYLVR				0.000139287	1031.61	516.814	1031.61	516.814	2	11	1.1.1.3103.3	31.6135	1556.32	366.86	30.51	0.81	3130.49
2	128.04	128.03	56.96	33.03	31.1	tr|F1QM37|F1QM37_DANRE	Acetyl-CoA carboxylase beta OS=Danio rerio OX=7955 GN=acacb PE=1 SV=2			0	99	AIGIGAYLVR				0.000139287	1031.61	516.814	1031.61	516.814	2	10	1.1.1.3107.2	31.8438	1556.32	289.9	30.51	0.81	2102
2	128.04	128.03	56.96	33.03	31.1	tr|F1QM37|F1QM37_DANRE	Acetyl-CoA carboxylase beta OS=Danio rerio OX=7955 GN=acacb PE=1 SV=2			0	99	AIGIGAYLVR				0.000139287	1031.61	516.814	1031.61	516.814	2	13	1.1.1.3116.5	32.3709	1556.32	239.16	30.51	0.81	1762.47
2	128.04	128.03	56.96	33.03	31.1	tr|F1QM37|F1QM37_DANRE	Acetyl-CoA carboxylase beta OS=Danio rerio OX=7955 GN=acacb PE=1 SV=2			0	99	AIGIGAYLVR				-0.00202596	1031.61	516.813	1031.61	516.814	2	11	2.1.1.3100.15	30.3232	745.94	303.11	30.7	0.98	1946.64
2	128.04	128.03	56.96	33.03	31.1	tr|F1QM37|F1QM37_DANRE	Acetyl-CoA carboxylase beta OS=Danio rerio OX=7955 GN=acacb PE=1 SV=2			0	99	AIGIGAYLVR				-0.00202596	1031.61	516.813	1031.61	516.814	2	13	2.1.1.3102.15	30.4388	745.94	446.66	30.7	0.98	2521.53
2	128.04	128.03	56.96	33.03	31.1	tr|F1QM37|F1QM37_DANRE	Acetyl-CoA carboxylase beta OS=Danio rerio OX=7955 GN=acacb PE=1 SV=2			0	99	AIGIGAYLVR				-0.00202596	1031.61	516.813	1031.61	516.814	2	15	2.1.1.3104.12	30.5495	745.94	629.08	30.7	0.98	3265.26
2	128.04	128.03	56.96	33.03	31.1	tr|F1QM37|F1QM37_DANRE	Acetyl-CoA carboxylase beta OS=Danio rerio OX=7955 GN=acacb PE=1 SV=2			0	99	AIGIGAYLVR				-0.00202596	1031.61	516.813	1031.61	516.814	2	13	2.1.1.3106.9	30.6602	745.94	745.23	30.7	0.98	3445.14
2	128.04	128.03	56.96	33.03	31.1	tr|F1QM37|F1QM37_DANRE	Acetyl-CoA carboxylase beta OS=Danio rerio OX=7955 GN=acacb PE=1 SV=2			0	99	AIGIGAYLVR				-0.00110154	1031.61	516.813	1031.61	516.814	2	15	2.1.1.3108.10	30.7775	745.94	644.13	30.7	0.98	3217.67
2	128.04	128.03	56.96	33.03	31.1	tr|F1QM37|F1QM37_DANRE	Acetyl-CoA carboxylase beta OS=Danio rerio OX=7955 GN=acacb PE=1 SV=2			0	99	AIGIGAYLVR				-0.00110154	1031.61	516.813	1031.61	516.814	2	14	2.1.1.3110.10	30.8931	745.94	498.57	30.7	0.98	2624.59
2	128.04	128.03	56.96	33.03	31.1	tr|F1QM37|F1QM37_DANRE	Acetyl-CoA carboxylase beta OS=Danio rerio OX=7955 GN=acacb PE=1 SV=2			0	99	AIGIGAYLVR				-0.00110154	1031.61	516.813	1031.61	516.814	2	15	2.1.1.3112.12	31.0125	745.94	439.48	30.7	0.98	2478.82
2	128.04	128.03	56.96	33.03	31.1	tr|F1QM37|F1QM37_DANRE	Acetyl-CoA carboxylase beta OS=Danio rerio OX=7955 GN=acacb PE=1 SV=2			0	99	AIGIGAYLVR				-0.00110154	1031.61	516.813	1031.61	516.814	2	10	2.1.1.3114.10	31.1253	745.94	344.78	30.7	0.98	1686.4
2	128.04	128.03	56.96	33.03	31.1	tr|F1QM37|F1QM37_DANRE	Acetyl-CoA carboxylase beta OS=Danio rerio OX=7955 GN=acacb PE=1 SV=2			0	80.21	AIGIGAYLVR				0.000139287	1031.61	516.814	1031.61	516.814	2	8	1.1.1.3101.7	31.504	1556.32	392.35	30.51	0.81	3337.66
2	128.04	128.03	56.96	33.03	31.1	tr|F1QM37|F1QM37_DANRE	Acetyl-CoA carboxylase beta OS=Danio rerio OX=7955 GN=acacb PE=1 SV=2			0	53.14	AIGIGAYLVR				0.000139287	1031.61	516.814	1031.61	516.814	2	6	1.1.1.3111.2	32.0759	1556.32	250	30.51	0.81	2048.01
2	128.04	128.03	56.96	33.03	31.1	tr|F1QM37|F1QM37_DANRE	Acetyl-CoA carboxylase beta OS=Danio rerio OX=7955 GN=acacb PE=1 SV=2			0	26.68	AIGIGAYLVR				0.000139287	1031.61	516.814	1031.61	516.814	2	6	1.1.1.3105.5	31.7328	1556.32	304.27	30.51	0.81	2648.1
2	128.04	128.03	56.96	33.03	31.1	tr|F1QM37|F1QM37_DANRE	Acetyl-CoA carboxylase beta OS=Danio rerio OX=7955 GN=acacb PE=1 SV=2			0	15.62	AIGIGAYLVR				0.000139287	1031.61	516.814	1031.61	516.814	2	5	1.1.1.3114.5	32.2549	1556.32	241.16	30.51	0.81	1825.15
2	128.04	128.03	56.96	33.03	31.1	tr|F1QM37|F1QM37_DANRE	Acetyl-CoA carboxylase beta OS=Danio rerio OX=7955 GN=acacb PE=1 SV=2			0	39.8	ANAEYIK				-0.00295008	807.41	404.712	807.413	404.714	2	8	1.1.1.2828.5	15.7704	191.81	159.52	15.54	0.68	2907.16
2	128.04	128.03	56.96	33.03	31.1	tr|F1QM37|F1QM37_DANRE	Acetyl-CoA carboxylase beta OS=Danio rerio OX=7955 GN=acacb PE=1 SV=2			0	97.75	APYDPR				-0.00197881	717.343	359.679	717.345	359.68	2	7	1.1.1.2832.3	15.994	323.8	268.3	15.93	0.57	2736.47
2	128.04	128.03	56.96	33.03	31.1	tr|F1QM37|F1QM37_DANRE	Acetyl-CoA carboxylase beta OS=Danio rerio OX=7955 GN=acacb PE=1 SV=2			0	95.29	APYDPR				-2.56833e-05	717.345	359.68	717.345	359.68	2	7	1.1.1.2846.3	16.7953	177.68	156.12	16.73	0.86	2672.88
2	128.04	128.03	56.96	33.03	31.1	tr|F1QM37|F1QM37_DANRE	Acetyl-CoA carboxylase beta OS=Danio rerio OX=7955 GN=acacb PE=1 SV=2			0	73.71	AYLWDNNK				-0.000573183	1022.48	512.248	1022.48	512.248	2	6	1.1.1.2951.12	22.8454	412.18	407.8	22.88	0.46	2128.11
2	128.04	128.03	56.96	33.03	31.1	tr|F1QM37|F1QM37_DANRE	Acetyl-CoA carboxylase beta OS=Danio rerio OX=7955 GN=acacb PE=1 SV=2			0	61.33	AYLWDNNK				-0.00350287	1022.48	512.247	1022.48	512.248	2	6	1.1.1.2958.13	23.2509	379.01	349.42	23.23	0.75	1709.79
2	128.04	128.03	56.96	33.03	31.1	tr|F1QM37|F1QM37_DANRE	Acetyl-CoA carboxylase beta OS=Danio rerio OX=7955 GN=acacb PE=1 SV=2			0	52.07	AYLWDNNK				-0.00350287	1022.48	512.247	1022.48	512.248	2	6	1.1.1.2956.15	23.1389	379.01	370.69	23.23	0.75	1851.15
2	128.04	128.03	56.96	33.03	31.1	tr|F1QM37|F1QM37_DANRE	Acetyl-CoA carboxylase beta OS=Danio rerio OX=7955 GN=acacb PE=1 SV=2			0	52.03	AYLWDNNK				-0.00350287	1022.48	512.247	1022.48	512.248	2	6	1.1.1.2965.13	23.6547	379.01	338.49	23.23	0.75	1763.97
2	128.04	128.03	56.96	33.03	31.1	tr|F1QM37|F1QM37_DANRE	Acetyl-CoA carboxylase beta OS=Danio rerio OX=7955 GN=acacb PE=1 SV=2			0	99	DFTVASPAEFVTR				-0.0016338	1438.71	720.361	1438.71	720.362	2	18	1.1.1.3104.21	31.7015	1554.22	1206.08	31.84	0.87	4763.9
2	128.04	128.03	56.96	33.03	31.1	tr|F1QM37|F1QM37_DANRE	Acetyl-CoA carboxylase beta OS=Danio rerio OX=7955 GN=acacb PE=1 SV=2			0	99	DFTVASPAEFVTR				-0.0016338	1438.71	720.361	1438.71	720.362	2	16	1.1.1.3106.26	31.8258	1554.22	1533.1	31.84	0.87	5578.9
2	128.04	128.03	56.96	33.03	31.1	tr|F1QM37|F1QM37_DANRE	Acetyl-CoA carboxylase beta OS=Danio rerio OX=7955 GN=acacb PE=1 SV=2			0	99	DFTVASPAEFVTR				-0.0016338	1438.71	720.361	1438.71	720.362	2	18	1.1.1.3108.24	31.9384	1554.22	1466.21	31.84	0.87	5303.45
2	128.04	128.03	56.96	33.03	31.1	tr|F1QM37|F1QM37_DANRE	Acetyl-CoA carboxylase beta OS=Danio rerio OX=7955 GN=acacb PE=1 SV=2			0	99	DFTVASPAEFVTR				-0.0016338	1438.71	720.361	1438.71	720.362	2	17	1.1.1.3110.25	32.0563	1554.22	1225.81	31.84	0.87	4436.95
2	128.04	128.03	56.96	33.03	31.1	tr|F1QM37|F1QM37_DANRE	Acetyl-CoA carboxylase beta OS=Danio rerio OX=7955 GN=acacb PE=1 SV=2			0	99	DFTVASPAEFVTR				-0.0016338	1438.71	720.361	1438.71	720.362	2	17	1.1.1.3112.24	32.1706	1554.22	1028.86	31.84	0.87	3800.35
2	128.04	128.03	56.96	33.03	31.1	tr|F1QM37|F1QM37_DANRE	Acetyl-CoA carboxylase beta OS=Danio rerio OX=7955 GN=acacb PE=1 SV=2			0	99	DFTVASPAEFVTR				-0.0016338	1438.71	720.361	1438.71	720.362	2	15	1.1.1.3114.25	32.2882	1554.22	875.27	31.84	0.87	3203.47
2	128.04	128.03	56.96	33.03	31.1	tr|F1QM37|F1QM37_DANRE	Acetyl-CoA carboxylase beta OS=Danio rerio OX=7955 GN=acacb PE=1 SV=2			0	99	DFTVASPAEFVTR				-0.0016338	1438.71	720.361	1438.71	720.362	2	16	1.1.1.3116.24	32.4026	1554.22	715.5	31.84	0.87	2937.43
2	128.04	128.03	56.96	33.03	31.1	tr|F1QM37|F1QM37_DANRE	Acetyl-CoA carboxylase beta OS=Danio rerio OX=7955 GN=acacb PE=1 SV=2			0	99	DFTVASPAEFVTR				-0.0016338	1438.71	720.361	1438.71	720.362	2	16	1.1.1.3118.20	32.5136	1554.22	632.93	31.84	0.87	2881.78
2	128.04	128.03	56.96	33.03	31.1	tr|F1QM37|F1QM37_DANRE	Acetyl-CoA carboxylase beta OS=Danio rerio OX=7955 GN=acacb PE=1 SV=2			0	99	DFTVASPAEFVTR				-0.0016338	1438.71	720.361	1438.71	720.362	2	13	1.1.1.3120.22	32.6311	1554.22	574.51	31.84	0.87	2210.42
2	128.04	128.03	56.96	33.03	31.1	tr|F1QM37|F1QM37_DANRE	Acetyl-CoA carboxylase beta OS=Danio rerio OX=7955 GN=acacb PE=1 SV=2			0	99	DFTVASPAEFVTR				-0.0016338	1438.71	720.361	1438.71	720.362	2	15	1.1.1.3123.14	32.7916	1554.22	516.42	31.84	0.87	2340.45
2	128.04	128.03	56.96	33.03	31.1	tr|F1QM37|F1QM37_DANRE	Acetyl-CoA carboxylase beta OS=Danio rerio OX=7955 GN=acacb PE=1 SV=2			0	99	DFTVASPAEFVTR				-0.0016338	1438.71	720.361	1438.71	720.362	2	13	1.1.1.3125.15	32.9091	1554.22	524.03	31.84	0.87	2225.67
2	128.04	128.03	56.96	33.03	31.1	tr|F1QM37|F1QM37_DANRE	Acetyl-CoA carboxylase beta OS=Danio rerio OX=7955 GN=acacb PE=1 SV=2			0	99	DFTVASPAEFVTR				-0.0016338	1438.71	720.361	1438.71	720.362	2	15	1.1.1.3127.10	33.0247	1554.22	493.58	31.84	0.87	2157.23
2	128.04	128.03	56.96	33.03	31.1	tr|F1QM37|F1QM37_DANRE	Acetyl-CoA carboxylase beta OS=Danio rerio OX=7955 GN=acacb PE=1 SV=2			0	99	DFTVASPAEFVTR				-0.0016338	1438.71	720.361	1438.71	720.362	2	12	1.1.1.3129.12	33.1355	1554.22	452.96	31.84	0.87	2035.62
2	128.04	128.03	56.96	33.03	31.1	tr|F1QM37|F1QM37_DANRE	Acetyl-CoA carboxylase beta OS=Danio rerio OX=7955 GN=acacb PE=1 SV=2			0	99	DFTVASPAEFVTR				-0.0016338	1438.71	720.361	1438.71	720.362	2	13	1.1.1.3131.13	33.253	1554.22	431.11	31.84	0.87	1914.94
2	128.04	128.03	56.96	33.03	31.1	tr|F1QM37|F1QM37_DANRE	Acetyl-CoA carboxylase beta OS=Danio rerio OX=7955 GN=acacb PE=1 SV=2			0	99	DFTVASPAEFVTR				-0.0016338	1438.71	720.361	1438.71	720.362	2	10	1.1.1.3133.18	33.3772	1554.22	377.1	31.84	0.87	1892.24
2	128.04	128.03	56.96	33.03	31.1	tr|F1QM37|F1QM37_DANRE	Acetyl-CoA carboxylase beta OS=Danio rerio OX=7955 GN=acacb PE=1 SV=2			0	99	DFTVASPAEFVTR				-0.0016338	1438.71	720.361	1438.71	720.362	2	13	1.1.1.3136.13	33.5495	1554.22	365.34	31.84	0.87	1803.8
2	128.04	128.03	56.96	33.03	31.1	tr|F1QM37|F1QM37_DANRE	Acetyl-CoA carboxylase beta OS=Danio rerio OX=7955 GN=acacb PE=1 SV=2			0	99	DFTVASPAEFVTR				-0.0016338	1438.71	720.361	1438.71	720.362	2	15	1.1.1.3138.16	33.6755	1554.22	371.5	31.84	0.87	1776.2
2	128.04	128.03	56.96	33.03	31.1	tr|F1QM37|F1QM37_DANRE	Acetyl-CoA carboxylase beta OS=Danio rerio OX=7955 GN=acacb PE=1 SV=2			0	99	DFTVASPAEFVTR				-0.0016338	1438.71	720.361	1438.71	720.362	2	9	1.1.1.3140.22	33.7897	1554.22	338.05	31.84	0.87	1565.82
2	128.04	128.03	56.96	33.03	31.1	tr|F1QM37|F1QM37_DANRE	Acetyl-CoA carboxylase beta OS=Danio rerio OX=7955 GN=acacb PE=1 SV=2			0	99	DFTVASPAEFVTR				-0.0016338	1438.71	720.361	1438.71	720.362	2	13	1.1.1.3142.16	33.9138	1554.22	297.39	31.84	0.87	1593.94
2	128.04	128.03	56.96	33.03	31.1	tr|F1QM37|F1QM37_DANRE	Acetyl-CoA carboxylase beta OS=Danio rerio OX=7955 GN=acacb PE=1 SV=2			0	99	DFTVASPAEFVTR				-0.0016338	1438.71	720.361	1438.71	720.362	2	13	1.1.1.3146.16	34.1318	1554.22	307.58	31.84	0.87	1497.46
2	128.04	128.03	56.96	33.03	31.1	tr|F1QM37|F1QM37_DANRE	Acetyl-CoA carboxylase beta OS=Danio rerio OX=7955 GN=acacb PE=1 SV=2			0	99	DFTVASPAEFVTR				-0.00340879	1438.71	720.36	1438.71	720.362	2	13	1.1.1.3158.16	34.8218	328.2	271.26	34.68	1.39	1633.19
2	128.04	128.03	56.96	33.03	31.1	tr|F1QM37|F1QM37_DANRE	Acetyl-CoA carboxylase beta OS=Danio rerio OX=7955 GN=acacb PE=1 SV=2			0	99	DFTVASPAEFVTR				-0.00340879	1438.71	720.36	1438.71	720.362	2	9	1.1.1.3173.10	35.6793	328.2	207.81	34.68	1.39	1139.79
2	128.04	128.03	56.96	33.03	31.1	tr|F1QM37|F1QM37_DANRE	Acetyl-CoA carboxylase beta OS=Danio rerio OX=7955 GN=acacb PE=1 SV=2			0	99	DFTVASPAEFVTR				-0.0016338	1438.71	720.361	1438.71	720.362	2	9	1.1.1.3131.14	33.2547	1554.22	430.56	31.84	0.87	2205.82
2	128.04	128.03	56.96	33.03	31.1	tr|F1QM37|F1QM37_DANRE	Acetyl-CoA carboxylase beta OS=Danio rerio OX=7955 GN=acacb PE=1 SV=2			0	98.74	DFTVASPAEFVTR				-0.00199066	1438.71	720.361	1438.71	720.362	2	9	2.1.1.3175.13	34.6692	177.47	147.2	34.29	0.64	1357.79
2	128.04	128.03	56.96	33.03	31.1	tr|F1QM37|F1QM37_DANRE	Acetyl-CoA carboxylase beta OS=Danio rerio OX=7955 GN=acacb PE=1 SV=2			0	95.26	DMYDQVLK				0.00814889	1010.48	506.248	1010.47	506.244	2	7	1.1.1.2956.13	23.1355	378.52	299.69	22.94	0.52	1989.22
2	128.04	128.03	56.96	33.03	31.1	tr|F1QM37|F1QM37_DANRE	Acetyl-CoA carboxylase beta OS=Danio rerio OX=7955 GN=acacb PE=1 SV=2			0	94.82	DMYDQVLK				0.00814889	1010.48	506.248	1010.47	506.244	2	8	1.1.1.2952.16	22.9097	378.52	374.43	22.94	0.52	2029.21
2	128.04	128.03	56.96	33.03	31.1	tr|F1QM37|F1QM37_DANRE	Acetyl-CoA carboxylase beta OS=Danio rerio OX=7955 GN=acacb PE=1 SV=2			0	34.79	DMYDQVLK	Oxidation(M)@2			-0.0130411	1026.46	514.235	1026.47	514.242	2	8	1.1.1.2905.20	20.2054	368.95	282.1	19.66	0.92	3187.88
2	128.04	128.03	56.96	33.03	31.1	tr|F1QM37|F1QM37_DANRE	Acetyl-CoA carboxylase beta OS=Danio rerio OX=7955 GN=acacb PE=1 SV=2			0	99	DVDEGLASAEK				0.00524158	1132.53	567.272	1132.52	567.27	2	14	1.1.1.2857.26	17.4648	435.35	402.65	17.54	1.33	1539.71
2	128.04	128.03	56.96	33.03	31.1	tr|F1QM37|F1QM37_DANRE	Acetyl-CoA carboxylase beta OS=Danio rerio OX=7955 GN=acacb PE=1 SV=2			0	99	DVDEGLASAEK				0.00524158	1132.53	567.272	1132.52	567.27	2	13	1.1.1.2859.24	17.5768	435.35	426.52	17.54	1.33	1690.47
2	128.04	128.03	56.96	33.03	31.1	tr|F1QM37|F1QM37_DANRE	Acetyl-CoA carboxylase beta OS=Danio rerio OX=7955 GN=acacb PE=1 SV=2			0	99	DVDEGLASAEK				0.00524158	1132.53	567.272	1132.52	567.27	2	12	1.1.1.2861.25	17.6938	435.35	342.31	17.54	1.33	1513.66
2	128.04	128.03	56.96	33.03	31.1	tr|F1QM37|F1QM37_DANRE	Acetyl-CoA carboxylase beta OS=Danio rerio OX=7955 GN=acacb PE=1 SV=2			0	99	DVDEGLASAEK				0.00524158	1132.53	567.272	1132.52	567.27	2	14	1.1.1.2864.28	17.8714	435.35	292.34	17.54	1.33	1494.52
2	128.04	128.03	56.96	33.03	31.1	tr|F1QM37|F1QM37_DANRE	Acetyl-CoA carboxylase beta OS=Danio rerio OX=7955 GN=acacb PE=1 SV=2			0	97.53	DVDEGLASAEK				0.00524158	1132.53	567.272	1132.52	567.27	2	9	1.1.1.2873.27	18.3884	435.35	243.53	17.54	1.33	1926.33
2	128.04	128.03	56.96	33.03	31.1	tr|F1QM37|F1QM37_DANRE	Acetyl-CoA carboxylase beta OS=Danio rerio OX=7955 GN=acacb PE=1 SV=2			0	89.6	DVDEGLASAEK				0.00524158	1132.53	567.272	1132.52	567.27	2	9	1.1.1.2875.22	18.4954	435.35	225.91	17.54	1.33	2166.53
2	128.04	128.03	56.96	33.03	31.1	tr|F1QM37|F1QM37_DANRE	Acetyl-CoA carboxylase beta OS=Danio rerio OX=7955 GN=acacb PE=1 SV=2			0	85	DVDEGLASAEK				0.00133532	1132.53	567.27	1132.52	567.27	2	8	1.1.1.2900.20	19.9184	408.59	408.21	19.94	0.75	1970.83
2	128.04	128.03	56.96	33.03	31.1	tr|F1QM37|F1QM37_DANRE	Acetyl-CoA carboxylase beta OS=Danio rerio OX=7955 GN=acacb PE=1 SV=2			0	58.27	DVDEGLASAEK				0.00757855	1132.53	567.273	1132.52	567.27	2	6	2.1.1.2901.24	18.8641	193.6	192.92	18.82	0.81	1378.16
2	128.04	128.03	56.96	33.03	31.1	tr|F1QM37|F1QM37_DANRE	Acetyl-CoA carboxylase beta OS=Danio rerio OX=7955 GN=acacb PE=1 SV=2			0	20.61	DVDEGLASAEK				0.00133532	1132.53	567.27	1132.52	567.27	2	8	1.1.1.2905.27	20.2171	408.59	317.61	19.94	0.75	1845.92
2	128.04	128.03	56.96	33.03	31.1	tr|F1QM37|F1QM37_DANRE	Acetyl-CoA carboxylase beta OS=Danio rerio OX=7955 GN=acacb PE=1 SV=2			0	99	EASFEYLQNEGER				0.00356838	1570.69	786.354	1570.69	786.352	2	17	2.1.1.2991.31	24.0586	483.44	466.77	24.24	1.27	1679.88
2	128.04	128.03	56.96	33.03	31.1	tr|F1QM37|F1QM37_DANRE	Acetyl-CoA carboxylase beta OS=Danio rerio OX=7955 GN=acacb PE=1 SV=2			0	99	EASFEYLQNEGER				0.00356838	1570.69	786.354	1570.69	786.352	2	13	2.1.1.2995.31	24.2898	483.44	414.8	24.24	1.27	1475.83
2	128.04	128.03	56.96	33.03	31.1	tr|F1QM37|F1QM37_DANRE	Acetyl-CoA carboxylase beta OS=Danio rerio OX=7955 GN=acacb PE=1 SV=2			0	99	EASFEYLQNEGER				0.00356838	1570.69	786.354	1570.69	786.352	2	14	2.1.1.2997.31	24.4051	483.44	366.28	24.24	1.27	1337.45
2	128.04	128.03	56.96	33.03	31.1	tr|F1QM37|F1QM37_DANRE	Acetyl-CoA carboxylase beta OS=Danio rerio OX=7955 GN=acacb PE=1 SV=2			0	99	EASFEYLQNEGER				0.00356838	1570.69	786.354	1570.69	786.352	2	14	2.1.1.2999.30	24.5187	483.44	301.01	24.24	1.27	1202.28
2	128.04	128.03	56.96	33.03	31.1	tr|F1QM37|F1QM37_DANRE	Acetyl-CoA carboxylase beta OS=Danio rerio OX=7955 GN=acacb PE=1 SV=2			0	99	EASFEYLQNEGER				0.00356838	1570.69	786.354	1570.69	786.352	2	10	2.1.1.3012.30	25.2683	483.44	175.41	24.24	1.27	916.14
2	128.04	128.03	56.96	33.03	31.1	tr|F1QM37|F1QM37_DANRE	Acetyl-CoA carboxylase beta OS=Danio rerio OX=7955 GN=acacb PE=1 SV=2			0	99	EEAISNMVVAMK	Oxidation(M)@11			-0.000215561	1336.64	669.326	1336.64	669.326	2	14	1.1.1.2927.26	21.4835	313.24	305.03	21.55	1.5	1292.66
2	128.04	128.03	56.96	33.03	31.1	tr|F1QM37|F1QM37_DANRE	Acetyl-CoA carboxylase beta OS=Danio rerio OX=7955 GN=acacb PE=1 SV=2			0	99	EEAISNMVVAMK	Oxidation(M)@11			-0.000215561	1336.64	669.326	1336.64	669.326	2	13	1.1.1.2929.27	21.6007	313.24	297.41	21.55	1.5	1277.97
2	128.04	128.03	56.96	33.03	31.1	tr|F1QM37|F1QM37_DANRE	Acetyl-CoA carboxylase beta OS=Danio rerio OX=7955 GN=acacb PE=1 SV=2			0	99	EEAISNMVVAMK	Oxidation(M)@11			-0.000215561	1336.64	669.326	1336.64	669.326	2	12	1.1.1.2935.29	21.9505	313.24	235.05	21.55	1.5	1054.91
2	128.04	128.03	56.96	33.03	31.1	tr|F1QM37|F1QM37_DANRE	Acetyl-CoA carboxylase beta OS=Danio rerio OX=7955 GN=acacb PE=1 SV=2			0	99	EEAISNMVVAMK				-0.00127767	1320.64	661.327	1320.64	661.328	2	14	1.1.1.3030.18	27.4218	320.12	315.27	27.56	1.21	1516.35
2	128.04	128.03	56.96	33.03	31.1	tr|F1QM37|F1QM37_DANRE	Acetyl-CoA carboxylase beta OS=Danio rerio OX=7955 GN=acacb PE=1 SV=2			0	99	EEAISNMVVAMK				-0.00127767	1320.64	661.327	1320.64	661.328	2	11	1.1.1.3032.24	27.5422	320.12	298.1	27.56	1.21	1410.85
2	128.04	128.03	56.96	33.03	31.1	tr|F1QM37|F1QM37_DANRE	Acetyl-CoA carboxylase beta OS=Danio rerio OX=7955 GN=acacb PE=1 SV=2			0	99	EEAISNMVVAMK				-0.00127767	1320.64	661.327	1320.64	661.328	2	13	1.1.1.3034.25	27.6627	320.12	261.92	27.56	1.21	1424.27
2	128.04	128.03	56.96	33.03	31.1	tr|F1QM37|F1QM37_DANRE	Acetyl-CoA carboxylase beta OS=Danio rerio OX=7955 GN=acacb PE=1 SV=2			0	99	EEAISNMVVAMK				-0.00127767	1320.64	661.327	1320.64	661.328	2	13	1.1.1.3049.23	28.5297	320.12	200.76	27.56	1.21	1618.64
2	128.04	128.03	56.96	33.03	31.1	tr|F1QM37|F1QM37_DANRE	Acetyl-CoA carboxylase beta OS=Danio rerio OX=7955 GN=acacb PE=1 SV=2			0	99	EEAISNMVVAMK				0.00819842	1320.65	661.332	1320.64	661.328	2	12	2.1.1.3052.20	27.5618	295.16	207.61	27.18	0.98	1054.45
2	128.04	128.03	56.96	33.03	31.1	tr|F1QM37|F1QM37_DANRE	Acetyl-CoA carboxylase beta OS=Danio rerio OX=7955 GN=acacb PE=1 SV=2			0	99	EEAISNMVVAMK	Oxidation(M)@11			-0.000215561	1336.64	669.326	1336.64	669.326	2	10	1.1.1.2931.28	21.7178	313.24	270.2	21.55	1.5	1288.06
2	128.04	128.03	56.96	33.03	31.1	tr|F1QM37|F1QM37_DANRE	Acetyl-CoA carboxylase beta OS=Danio rerio OX=7955 GN=acacb PE=1 SV=2			0	99	EEAISNMVVAMK				0.00819842	1320.65	661.332	1320.64	661.328	2	10	2.1.1.3044.26	27.1084	295.16	293.17	27.18	0.98	1373.45
2	128.04	128.03	56.96	33.03	31.1	tr|F1QM37|F1QM37_DANRE	Acetyl-CoA carboxylase beta OS=Danio rerio OX=7955 GN=acacb PE=1 SV=2			0	99	EEAISNMVVAMK	Oxidation(M)@7; Oxidation(M)@11			0.0123729	1352.64	677.329	1352.63	677.323	2	10	1.1.1.2871.31	18.2799	230.31	228.67	18.29	0.81	1091.7
2	128.04	128.03	56.96	33.03	31.1	tr|F1QM37|F1QM37_DANRE	Acetyl-CoA carboxylase beta OS=Danio rerio OX=7955 GN=acacb PE=1 SV=2			0	23.05	EEAISNMVVAMK	Oxidation(M)@7			0.0144329	1336.65	669.333	1336.64	669.326	2	7	1.1.1.2983.27	24.7179	264.31	256.96	24.73	1.04	1504.12
2	128.04	128.03	56.96	33.03	31.1	tr|F1QM37|F1QM37_DANRE	Acetyl-CoA carboxylase beta OS=Danio rerio OX=7955 GN=acacb PE=1 SV=2			0	99	EEGIGVENLR				0.0047602	1114.57	558.291	1114.56	558.288	2	13	1.1.1.2911.21	20.5516	1309.21	1260.64	20.57	1.04	4986.46
2	128.04	128.03	56.96	33.03	31.1	tr|F1QM37|F1QM37_DANRE	Acetyl-CoA carboxylase beta OS=Danio rerio OX=7955 GN=acacb PE=1 SV=2			0	99	EEGIGVENLR				0.0047602	1114.57	558.291	1114.56	558.288	2	15	1.1.1.2913.20	20.6651	1309.21	1292.67	20.57	1.04	5194.08
2	128.04	128.03	56.96	33.03	31.1	tr|F1QM37|F1QM37_DANRE	Acetyl-CoA carboxylase beta OS=Danio rerio OX=7955 GN=acacb PE=1 SV=2			0	99	EEGIGVENLR				0.0047602	1114.57	558.291	1114.56	558.288	2	15	1.1.1.2915.20	20.7804	1309.21	1258.87	20.57	1.04	4739.17
2	128.04	128.03	56.96	33.03	31.1	tr|F1QM37|F1QM37_DANRE	Acetyl-CoA carboxylase beta OS=Danio rerio OX=7955 GN=acacb PE=1 SV=2			0	99	EEGIGVENLR				0.0047602	1114.57	558.291	1114.56	558.288	2	15	1.1.1.2917.18	20.8927	1309.21	1128.24	20.57	1.04	4309.66
2	128.04	128.03	56.96	33.03	31.1	tr|F1QM37|F1QM37_DANRE	Acetyl-CoA carboxylase beta OS=Danio rerio OX=7955 GN=acacb PE=1 SV=2			0	99	EEGIGVENLR				0.00708256	1114.57	558.292	1114.56	558.288	2	11	1.1.1.2919.18	21.0084	1309.21	978.07	20.57	1.04	3923.94
2	128.04	128.03	56.96	33.03	31.1	tr|F1QM37|F1QM37_DANRE	Acetyl-CoA carboxylase beta OS=Danio rerio OX=7955 GN=acacb PE=1 SV=2			0	99	EEGIGVENLR				0.00381943	1114.57	558.29	1114.56	558.288	2	11	2.1.1.2933.24	20.702	621.05	549.44	20.83	1.21	3328.74
2	128.04	128.03	56.96	33.03	31.1	tr|F1QM37|F1QM37_DANRE	Acetyl-CoA carboxylase beta OS=Danio rerio OX=7955 GN=acacb PE=1 SV=2			0	99	EEGIGVENLR				0.00381943	1114.57	558.29	1114.56	558.288	2	10	2.1.1.2935.24	20.8173	621.05	588.41	20.83	1.21	3371.85
2	128.04	128.03	56.96	33.03	31.1	tr|F1QM37|F1QM37_DANRE	Acetyl-CoA carboxylase beta OS=Danio rerio OX=7955 GN=acacb PE=1 SV=2			0	99	EEGIGVENLR				0.0047602	1114.57	558.291	1114.56	558.288	2	10	1.1.1.2907.22	20.3227	1309.21	511.34	20.57	1.04	2922.47
2	128.04	128.03	56.96	33.03	31.1	tr|F1QM37|F1QM37_DANRE	Acetyl-CoA carboxylase beta OS=Danio rerio OX=7955 GN=acacb PE=1 SV=2			0	99	EEGIGVENLR				0.00708256	1114.57	558.292	1114.56	558.288	2	10	1.1.1.2921.18	21.1237	1309.21	856.69	20.57	1.04	3670.69
2	128.04	128.03	56.96	33.03	31.1	tr|F1QM37|F1QM37_DANRE	Acetyl-CoA carboxylase beta OS=Danio rerio OX=7955 GN=acacb PE=1 SV=2			0	99	EEGIGVENLR				0.00381943	1114.57	558.29	1114.56	558.288	2	10	2.1.1.2937.22	20.9296	621.05	492.99	20.83	1.21	3255.08
2	128.04	128.03	56.96	33.03	31.1	tr|F1QM37|F1QM37_DANRE	Acetyl-CoA carboxylase beta OS=Danio rerio OX=7955 GN=acacb PE=1 SV=2			0	98.41	EEGIGVENLR				0.00381943	1114.57	558.29	1114.56	558.288	2	9	2.1.1.2939.26	21.0516	621.05	462.08	20.83	1.21	2872.38
2	128.04	128.03	56.96	33.03	31.1	tr|F1QM37|F1QM37_DANRE	Acetyl-CoA carboxylase beta OS=Danio rerio OX=7955 GN=acacb PE=1 SV=2			0	94.53	EEGIGVENLR				0.00381943	1114.57	558.29	1114.56	558.288	2	9	2.1.1.2941.25	21.1653	621.05	470.24	20.83	1.21	3059.12
2	128.04	128.03	56.96	33.03	31.1	tr|F1QM37|F1QM37_DANRE	Acetyl-CoA carboxylase beta OS=Danio rerio OX=7955 GN=acacb PE=1 SV=2			0	94.37	EEGIGVENLR				0.0116319	1114.57	558.294	1114.56	558.288	2	9	2.1.1.2944.24	21.3368	543.34	465.62	21.41	0.58	3094.61
2	128.04	128.03	56.96	33.03	31.1	tr|F1QM37|F1QM37_DANRE	Acetyl-CoA carboxylase beta OS=Danio rerio OX=7955 GN=acacb PE=1 SV=2			0	90.56	EEGIGVENLR				0.00708256	1114.57	558.292	1114.56	558.288	2	11	1.1.1.2924.24	21.307	1309.21	593.21	20.57	1.04	7977.89
2	128.04	128.03	56.96	33.03	31.1	tr|F1QM37|F1QM37_DANRE	Acetyl-CoA carboxylase beta OS=Danio rerio OX=7955 GN=acacb PE=1 SV=2			0	59.84	EEGIGVENLR				0.0101343	1114.57	558.293	1114.56	558.288	2	8	1.1.1.2943.20	22.3973	511.31	428.29	22.31	0.81	3793.95
2	128.04	128.03	56.96	33.03	31.1	tr|F1QM37|F1QM37_DANRE	Acetyl-CoA carboxylase beta OS=Danio rerio OX=7955 GN=acacb PE=1 SV=2			0	48.57	EEGIGVENLR				0.0101343	1114.57	558.293	1114.56	558.288	2	8	1.1.1.2941.16	22.2751	511.31	461.1	22.31	0.81	4915.12
2	128.04	128.03	56.96	33.03	31.1	tr|F1QM37|F1QM37_DANRE	Acetyl-CoA carboxylase beta OS=Danio rerio OX=7955 GN=acacb PE=1 SV=2			0	38.08	EEGIGVENLR				0.00793705	1114.57	558.292	1114.56	558.288	2	10	1.1.1.2934.23	21.8828	548.14	547.39	21.84	0.23	7494.81
2	128.04	128.03	56.96	33.03	31.1	tr|F1QM37|F1QM37_DANRE	Acetyl-CoA carboxylase beta OS=Danio rerio OX=7955 GN=acacb PE=1 SV=2			0	33.08	EEGIGVENLR				0.0108667	1114.57	558.294	1114.56	558.288	2	7	1.1.1.2953.19	22.9724	452.97	444.42	22.77	0.69	3313.26
2	128.04	128.03	56.96	33.03	31.1	tr|F1QM37|F1QM37_DANRE	Acetyl-CoA carboxylase beta OS=Danio rerio OX=7955 GN=acacb PE=1 SV=2			0	25.79	EEGIGVENLR				0.0108667	1114.57	558.294	1114.56	558.288	2	8	1.1.1.2947.19	22.6262	452.97	443.58	22.77	0.69	3714.47
2	128.04	128.03	56.96	33.03	31.1	tr|F1QM37|F1QM37_DANRE	Acetyl-CoA carboxylase beta OS=Danio rerio OX=7955 GN=acacb PE=1 SV=2			0	20.76	EEGIGVENLR				0.0136744	1114.58	558.295	1114.56	558.288	2	7	1.1.1.2957.15	23.1965	471.6	466.9	23.23	0.87	3028.41
2	128.04	128.03	56.96	33.03	31.1	tr|F1QM37|F1QM37_DANRE	Acetyl-CoA carboxylase beta OS=Danio rerio OX=7955 GN=acacb PE=1 SV=2			0	18.35	EEGIGVENLR				0.0108667	1114.57	558.294	1114.56	558.288	2	8	1.1.1.2955.19	23.0877	452.97	422.47	22.77	0.69	2877.38
2	128.04	128.03	56.96	33.03	31.1	tr|F1QM37|F1QM37_DANRE	Acetyl-CoA carboxylase beta OS=Danio rerio OX=7955 GN=acacb PE=1 SV=2			0	17.89	EEGIGVENLR				0.0108667	1114.57	558.294	1114.56	558.288	2	7	1.1.1.2949.19	22.7417	452.97	443.77	22.77	0.69	3291.16
2	128.04	128.03	56.96	33.03	31.1	tr|F1QM37|F1QM37_DANRE	Acetyl-CoA carboxylase beta OS=Danio rerio OX=7955 GN=acacb PE=1 SV=2			0	16.11	EEGIGVENLR				0.0111109	1114.57	558.294	1114.56	558.288	2	7	1.1.1.2967.16	23.775	387.99	382.85	23.8	0.29	2899.84
2	128.04	128.03	56.96	33.03	31.1	tr|F1QM37|F1QM37_DANRE	Acetyl-CoA carboxylase beta OS=Danio rerio OX=7955 GN=acacb PE=1 SV=2			0	15.85	EEGIGVENLR				0.00268803	1114.56	558.29	1114.56	558.288	2	7	1.1.1.2973.21	24.1303	414.93	357.19	25.08	1.62	2347.85
2	128.04	128.03	56.96	33.03	31.1	tr|F1QM37|F1QM37_DANRE	Acetyl-CoA carboxylase beta OS=Danio rerio OX=7955 GN=acacb PE=1 SV=2			0	99	EFSQPVLVYIPPNAELR				0.00789939	1971.05	986.534	1971.05	986.531	2	17	1.1.1.3205.18	37.5626	504.66	403.64	37.8	1.73	2370.88
2	128.04	128.03	56.96	33.03	31.1	tr|F1QM37|F1QM37_DANRE	Acetyl-CoA carboxylase beta OS=Danio rerio OX=7955 GN=acacb PE=1 SV=2			0	99	EFSQPVLVYIPPNAELR				0.00789939	1971.05	986.534	1971.05	986.531	2	19	1.1.1.3207.20	37.6749	504.66	480.23	37.8	1.73	3117.77
2	128.04	128.03	56.96	33.03	31.1	tr|F1QM37|F1QM37_DANRE	Acetyl-CoA carboxylase beta OS=Danio rerio OX=7955 GN=acacb PE=1 SV=2			0	99	EFSQPVLVYIPPNAELR				0.00789939	1971.05	986.534	1971.05	986.531	2	18	1.1.1.3209.21	37.7939	504.66	504.47	37.8	1.73	2569.54
2	128.04	128.03	56.96	33.03	31.1	tr|F1QM37|F1QM37_DANRE	Acetyl-CoA carboxylase beta OS=Danio rerio OX=7955 GN=acacb PE=1 SV=2			0	99	EFSQPVLVYIPPNAELR				0.00789939	1971.05	986.534	1971.05	986.531	2	19	1.1.1.3214.16	38.0832	504.66	347.14	37.8	1.73	2179.95
2	128.04	128.03	56.96	33.03	31.1	tr|F1QM37|F1QM37_DANRE	Acetyl-CoA carboxylase beta OS=Danio rerio OX=7955 GN=acacb PE=1 SV=2			0	99	EIDFVPTK				0.00266042	947.499	474.757	947.496	474.755	2	10	1.1.1.2933.10	21.8033	1074.72	1066.42	21.79	0.81	5932.32
2	128.04	128.03	56.96	33.03	31.1	tr|F1QM37|F1QM37_DANRE	Acetyl-CoA carboxylase beta OS=Danio rerio OX=7955 GN=acacb PE=1 SV=2			0	99	EIDFVPTK				0.00266042	947.499	474.757	947.496	474.755	2	9	1.1.1.2937.12	22.0376	1074.72	727.57	21.79	0.81	4297.89
2	128.04	128.03	56.96	33.03	31.1	tr|F1QM37|F1QM37_DANRE	Acetyl-CoA carboxylase beta OS=Danio rerio OX=7955 GN=acacb PE=1 SV=2			0	97.72	EIDFVPTK				0.00266042	947.499	474.757	947.496	474.755	2	9	1.1.1.2935.10	21.9188	1074.72	930.77	21.79	0.81	4851.35
2	128.04	128.03	56.96	33.03	31.1	tr|F1QM37|F1QM37_DANRE	Acetyl-CoA carboxylase beta OS=Danio rerio OX=7955 GN=acacb PE=1 SV=2			0	96.94	EIDFVPTK				0.00266042	947.499	474.757	947.496	474.755	2	9	1.1.1.2929.7	21.5673	1074.72	690.72	21.79	0.81	4232.96
2	128.04	128.03	56.96	33.03	31.1	tr|F1QM37|F1QM37_DANRE	Acetyl-CoA carboxylase beta OS=Danio rerio OX=7955 GN=acacb PE=1 SV=2			0	94.79	EIDFVPTK				0.00266042	947.499	474.757	947.496	474.755	2	7	1.1.1.2927.10	21.4568	1074.72	376.31	21.79	0.81	2620.09
2	128.04	128.03	56.96	33.03	31.1	tr|F1QM37|F1QM37_DANRE	Acetyl-CoA carboxylase beta OS=Danio rerio OX=7955 GN=acacb PE=1 SV=2			0	93.13	EIDFVPTK				0.00180593	947.498	474.756	947.496	474.755	2	8	1.1.1.2953.9	22.9557	349.77	348.17	23.11	1.62	2379.04
2	128.04	128.03	56.96	33.03	31.1	tr|F1QM37|F1QM37_DANRE	Acetyl-CoA carboxylase beta OS=Danio rerio OX=7955 GN=acacb PE=1 SV=2			0	86.25	EIDFVPTK				0.00461354	947.501	474.758	947.496	474.755	2	8	1.1.1.2950.11	22.7861	364.85	354.37	22.77	0.98	2343.66
2	128.04	128.03	56.96	33.03	31.1	tr|F1QM37|F1QM37_DANRE	Acetyl-CoA carboxylase beta OS=Danio rerio OX=7955 GN=acacb PE=1 SV=2			0	85.45	EIDFVPTK				0.00266042	947.499	474.757	947.496	474.755	2	9	1.1.1.2940.9	22.206	1074.72	596.25	21.79	0.81	2726.17
2	128.04	128.03	56.96	33.03	31.1	tr|F1QM37|F1QM37_DANRE	Acetyl-CoA carboxylase beta OS=Danio rerio OX=7955 GN=acacb PE=1 SV=2			0	84.96	EIDFVPTK				0.00266042	947.499	474.757	947.496	474.755	2	8	1.1.1.2946.12	22.5569	1074.72	378.7	21.79	0.81	2452.14
2	128.04	128.03	56.96	33.03	31.1	tr|F1QM37|F1QM37_DANRE	Acetyl-CoA carboxylase beta OS=Danio rerio OX=7955 GN=acacb PE=1 SV=2			0	80.32	EIDFVPTK				0.00180593	947.498	474.756	947.496	474.755	2	7	1.1.1.2957.10	23.1882	349.77	305.77	23.11	1.62	3113.99
2	128.04	128.03	56.96	33.03	31.1	tr|F1QM37|F1QM37_DANRE	Acetyl-CoA carboxylase beta OS=Danio rerio OX=7955 GN=acacb PE=1 SV=2			0	50.66	EIDFVPTK				0.00266042	947.499	474.757	947.496	474.755	2	7	1.1.1.2942.11	22.3244	1074.72	489.55	21.79	0.81	2479.72
2	128.04	128.03	56.96	33.03	31.1	tr|F1QM37|F1QM37_DANRE	Acetyl-CoA carboxylase beta OS=Danio rerio OX=7955 GN=acacb PE=1 SV=2			0	48.8	EIDFVPTK				-0.0100912	947.486	474.75	947.496	474.755	2	6	2.1.1.2978.10	23.2743	191.13	152.23	23.2	1.33	1739.28
2	128.04	128.03	56.96	33.03	31.1	tr|F1QM37|F1QM37_DANRE	Acetyl-CoA carboxylase beta OS=Danio rerio OX=7955 GN=acacb PE=1 SV=2			0	99	EIMQANQDLSNGHIQSMLR				0.00261881	2184.04	729.022	2184.04	729.021	3	13	1.1.1.3044.23	28.2407	440.48	349.75	28.43	0.52	2524.06
2	128.04	128.03	56.96	33.03	31.1	tr|F1QM37|F1QM37_DANRE	Acetyl-CoA carboxylase beta OS=Danio rerio OX=7955 GN=acacb PE=1 SV=2			0	99	ENPIHIINVSIK				-0.00157277	1375.78	459.601	1375.78	459.601	3	12	2.1.1.3066.11	28.353	501.48	450.03	28.39	0.75	2582
2	128.04	128.03	56.96	33.03	31.1	tr|F1QM37|F1QM37_DANRE	Acetyl-CoA carboxylase beta OS=Danio rerio OX=7955 GN=acacb PE=1 SV=2			0	99	ENPIHIINVSIK				-0.00157277	1375.78	459.601	1375.78	459.601	3	12	2.1.1.3070.9	28.5804	501.48	414.23	28.39	0.75	2329.95
2	128.04	128.03	56.96	33.03	31.1	tr|F1QM37|F1QM37_DANRE	Acetyl-CoA carboxylase beta OS=Danio rerio OX=7955 GN=acacb PE=1 SV=2			0	99	ENPIHIINVSIK				-0.00157277	1375.78	459.601	1375.78	459.601	3	11	2.1.1.3064.8	28.2326	501.48	308.84	28.39	0.75	2147.59
2	128.04	128.03	56.96	33.03	31.1	tr|F1QM37|F1QM37_DANRE	Acetyl-CoA carboxylase beta OS=Danio rerio OX=7955 GN=acacb PE=1 SV=2			0	99	ENPIHIINVSIK				-0.00142273	1375.78	459.601	1375.78	459.601	3	11	1.1.1.3048.6	28.4368	829.44	797.95	28.37	0.75	3222.08
2	128.04	128.03	56.96	33.03	31.1	tr|F1QM37|F1QM37_DANRE	Acetyl-CoA carboxylase beta OS=Danio rerio OX=7955 GN=acacb PE=1 SV=2			0	99	ENPIHIINVSIK				-0.00142273	1375.78	459.601	1375.78	459.601	3	10	1.1.1.3050.6	28.5525	829.44	628.74	28.37	0.75	2658.89
2	128.04	128.03	56.96	33.03	31.1	tr|F1QM37|F1QM37_DANRE	Acetyl-CoA carboxylase beta OS=Danio rerio OX=7955 GN=acacb PE=1 SV=2			0	99	ENPIHIINVSIK				-0.00157277	1375.78	459.601	1375.78	459.601	3	9	2.1.1.3074.10	28.8129	501.48	249.57	28.39	0.75	1902.63
2	128.04	128.03	56.96	33.03	31.1	tr|F1QM37|F1QM37_DANRE	Acetyl-CoA carboxylase beta OS=Danio rerio OX=7955 GN=acacb PE=1 SV=2			0	99	ENPIHIINVSIK				-0.00456234	1375.78	688.896	1375.78	688.898	2	12	1.1.1.3042.18	28.1184	320.23	234.9	28.31	1.1	1911.37
2	128.04	128.03	56.96	33.03	31.1	tr|F1QM37|F1QM37_DANRE	Acetyl-CoA carboxylase beta OS=Danio rerio OX=7955 GN=acacb PE=1 SV=2			0	98.1	ENPIHIINVSIK				-0.00157277	1375.78	459.601	1375.78	459.601	3	9	2.1.1.3072.10	28.6976	501.48	339.89	28.39	0.75	1966.23
2	128.04	128.03	56.96	33.03	31.1	tr|F1QM37|F1QM37_DANRE	Acetyl-CoA carboxylase beta OS=Danio rerio OX=7955 GN=acacb PE=1 SV=2			0	96.38	ENPIHIINVSIK				-0.00142273	1375.78	459.601	1375.78	459.601	3	10	1.1.1.3044.6	28.2057	829.44	617.35	28.37	0.75	2520.53
2	128.04	128.03	56.96	33.03	31.1	tr|F1QM37|F1QM37_DANRE	Acetyl-CoA carboxylase beta OS=Danio rerio OX=7955 GN=acacb PE=1 SV=2			0	67.77	ENPIHIINVSIK	Deamidated(N)@8			0.0167286	1376.78	459.935	1376.77	459.929	3	7	2.1.1.3073.6	28.7486	305.89	182.25	28.51	0.92	1745.08
2	128.04	128.03	56.96	33.03	31.1	tr|F1QM37|F1QM37_DANRE	Acetyl-CoA carboxylase beta OS=Danio rerio OX=7955 GN=acacb PE=1 SV=2			0	30.96	ENPIHIINVSIK				-0.00157277	1375.78	459.601	1375.78	459.601	3	7	2.1.1.3068.10	28.4668	501.48	493.54	28.39	0.75	2393.25
2	128.04	128.03	56.96	33.03	31.1	tr|F1QM37|F1QM37_DANRE	Acetyl-CoA carboxylase beta OS=Danio rerio OX=7955 GN=acacb PE=1 SV=2			0	17.41	EPNATVSQHMPK				-0.00411164	1337.64	446.886	1337.64	446.887	3	7	1.1.1.2842.10	16.577	168.35	121.26	16.68	0.52	3822.45
2	128.04	128.03	56.96	33.03	31.1	tr|F1QM37|F1QM37_DANRE	Acetyl-CoA carboxylase beta OS=Danio rerio OX=7955 GN=acacb PE=1 SV=2			0	99	ESMSDFLHSLER				0.0018981	1449.66	484.226	1449.66	484.226	3	11	1.1.1.3239.3	39.4886	540.69	201.43	38.5	0.81	1019.46
2	128.04	128.03	56.96	33.03	31.1	tr|F1QM37|F1QM37_DANRE	Acetyl-CoA carboxylase beta OS=Danio rerio OX=7955 GN=acacb PE=1 SV=2			0	99	ESMSDFLHSLER				-0.00220277	1449.65	484.225	1449.66	484.226	3	11	2.1.1.3245.2	38.6973	249.22	235.94	38.69	0.98	1258.08
2	128.04	128.03	56.96	33.03	31.1	tr|F1QM37|F1QM37_DANRE	Acetyl-CoA carboxylase beta OS=Danio rerio OX=7955 GN=acacb PE=1 SV=2			0	99	ESMSDFLHSLER				-0.00220277	1449.65	484.225	1449.66	484.226	3	11	2.1.1.3247.2	38.8113	249.22	208.62	38.69	0.98	1179.9
2	128.04	128.03	56.96	33.03	31.1	tr|F1QM37|F1QM37_DANRE	Acetyl-CoA carboxylase beta OS=Danio rerio OX=7955 GN=acacb PE=1 SV=2			0	99	ESMSDFLHSLER				0.0018981	1449.66	484.226	1449.66	484.226	3	11	1.1.1.3220.2	38.3869	540.69	438.21	38.5	0.81	2009.15
2	128.04	128.03	56.96	33.03	31.1	tr|F1QM37|F1QM37_DANRE	Acetyl-CoA carboxylase beta OS=Danio rerio OX=7955 GN=acacb PE=1 SV=2			0	99	ESMSDFLHSLER				0.0018981	1449.66	484.226	1449.66	484.226	3	10	1.1.1.3230.3	38.9683	540.69	300.8	38.5	0.81	1458.87
2	128.04	128.03	56.96	33.03	31.1	tr|F1QM37|F1QM37_DANRE	Acetyl-CoA carboxylase beta OS=Danio rerio OX=7955 GN=acacb PE=1 SV=2			0	99	ESMSDFLHSLER				0.0018981	1449.66	484.226	1449.66	484.226	3	10	1.1.1.3224.2	38.6181	540.69	482.95	38.5	0.81	2182.32
2	128.04	128.03	56.96	33.03	31.1	tr|F1QM37|F1QM37_DANRE	Acetyl-CoA carboxylase beta OS=Danio rerio OX=7955 GN=acacb PE=1 SV=2			0	99	ESMSDFLHSLER				0.0018981	1449.66	484.226	1449.66	484.226	3	11	1.1.1.3226.2	38.7321	540.69	418.28	38.5	0.81	1732.87
2	128.04	128.03	56.96	33.03	31.1	tr|F1QM37|F1QM37_DANRE	Acetyl-CoA carboxylase beta OS=Danio rerio OX=7955 GN=acacb PE=1 SV=2			0	99	ESMSDFLHSLER				0.0018981	1449.66	484.226	1449.66	484.226	3	10	1.1.1.3222.2	38.5008	540.69	537.86	38.5	0.81	2161.92
2	128.04	128.03	56.96	33.03	31.1	tr|F1QM37|F1QM37_DANRE	Acetyl-CoA carboxylase beta OS=Danio rerio OX=7955 GN=acacb PE=1 SV=2			0	99	ESMSDFLHSLER				-0.00220277	1449.65	484.225	1449.66	484.226	3	10	2.1.1.3243.2	38.5784	249.22	229.53	38.69	0.98	1311.3
2	128.04	128.03	56.96	33.03	31.1	tr|F1QM37|F1QM37_DANRE	Acetyl-CoA carboxylase beta OS=Danio rerio OX=7955 GN=acacb PE=1 SV=2			0	99	ESMSDFLHSLER				0.0018981	1449.66	484.226	1449.66	484.226	3	10	1.1.1.3218.2	38.2712	540.69	303.94	38.5	0.81	1673.82
2	128.04	128.03	56.96	33.03	31.1	tr|F1QM37|F1QM37_DANRE	Acetyl-CoA carboxylase beta OS=Danio rerio OX=7955 GN=acacb PE=1 SV=2			0	99	ESMSDFLHSLER				-0.00220277	1449.65	484.225	1449.66	484.226	3	10	2.1.1.3253.2	39.1577	249.22	131.43	38.69	0.98	873.36
2	128.04	128.03	56.96	33.03	31.1	tr|F1QM37|F1QM37_DANRE	Acetyl-CoA carboxylase beta OS=Danio rerio OX=7955 GN=acacb PE=1 SV=2			0	99	ESMSDFLHSLER				-0.00220277	1449.65	484.225	1449.66	484.226	3	9	2.1.1.3241.2	38.4628	249.22	169.43	38.69	0.98	888.782
2	128.04	128.03	56.96	33.03	31.1	tr|F1QM37|F1QM37_DANRE	Acetyl-CoA carboxylase beta OS=Danio rerio OX=7955 GN=acacb PE=1 SV=2			0	99	ESMSDFLHSLER	Oxidation(M)@3			-0.00574733	1465.65	489.556	1465.65	489.558	3	9	1.1.1.3044.10	28.2124	328.53	310.99	28.19	1.21	1565.01
2	128.04	128.03	56.96	33.03	31.1	tr|F1QM37|F1QM37_DANRE	Acetyl-CoA carboxylase beta OS=Danio rerio OX=7955 GN=acacb PE=1 SV=2			0	99	ESMSDFLHSLER				0.0018981	1449.66	484.226	1449.66	484.226	3	10	1.1.1.3233.3	39.1418	540.69	221.64	38.5	0.81	1246.21
2	128.04	128.03	56.96	33.03	31.1	tr|F1QM37|F1QM37_DANRE	Acetyl-CoA carboxylase beta OS=Danio rerio OX=7955 GN=acacb PE=1 SV=2			0	98.23	ESMSDFLHSLER				0.0018981	1449.66	484.226	1449.66	484.226	3	8	1.1.1.3235.4	39.2558	540.69	211.97	38.5	0.81	1086.51
2	128.04	128.03	56.96	33.03	31.1	tr|F1QM37|F1QM37_DANRE	Acetyl-CoA carboxylase beta OS=Danio rerio OX=7955 GN=acacb PE=1 SV=2			0	72.08	ESMSDFLHSLER	Oxidation(M)@3			-0.00574733	1465.65	489.556	1465.65	489.558	3	7	1.1.1.3048.12	28.4469	328.53	217.46	28.19	1.21	1391.66
2	128.04	128.03	56.96	33.03	31.1	tr|F1QM37|F1QM37_DANRE	Acetyl-CoA carboxylase beta OS=Danio rerio OX=7955 GN=acacb PE=1 SV=2			0	99	FGSYIVDALR				-0.00350177	1139.59	570.804	1139.6	570.806	2	13	1.1.1.3083.15	30.475	1471.83	377.78	30.85	0.81	1622.6
2	128.04	128.03	56.96	33.03	31.1	tr|F1QM37|F1QM37_DANRE	Acetyl-CoA carboxylase beta OS=Danio rerio OX=7955 GN=acacb PE=1 SV=2			0	99	FGSYIVDALR				-0.00350177	1139.59	570.804	1139.6	570.806	2	16	1.1.1.3087.12	30.7014	1471.83	1181.41	30.85	0.81	3578.1
2	128.04	128.03	56.96	33.03	31.1	tr|F1QM37|F1QM37_DANRE	Acetyl-CoA carboxylase beta OS=Danio rerio OX=7955 GN=acacb PE=1 SV=2			0	99	FGSYIVDALR				-0.00350177	1139.59	570.804	1139.6	570.806	2	16	1.1.1.3089.14	30.8209	1471.83	1434.69	30.85	0.81	3880.84
2	128.04	128.03	56.96	33.03	31.1	tr|F1QM37|F1QM37_DANRE	Acetyl-CoA carboxylase beta OS=Danio rerio OX=7955 GN=acacb PE=1 SV=2			0	99	FGSYIVDALR				-0.00350177	1139.59	570.804	1139.6	570.806	2	14	1.1.1.3091.11	30.9322	1471.83	1344.3	30.85	0.81	4154.38
2	128.04	128.03	56.96	33.03	31.1	tr|F1QM37|F1QM37_DANRE	Acetyl-CoA carboxylase beta OS=Danio rerio OX=7955 GN=acacb PE=1 SV=2			0	99	FGSYIVDALR				-0.00350177	1139.59	570.804	1139.6	570.806	2	15	1.1.1.3093.10	31.0459	1471.83	1049.78	30.85	0.81	4080.8
2	128.04	128.03	56.96	33.03	31.1	tr|F1QM37|F1QM37_DANRE	Acetyl-CoA carboxylase beta OS=Danio rerio OX=7955 GN=acacb PE=1 SV=2			0	99	FGSYIVDALR				-0.00350177	1139.59	570.804	1139.6	570.806	2	14	1.1.1.3095.8	31.1575	1471.83	869.06	30.85	0.81	3499.27
2	128.04	128.03	56.96	33.03	31.1	tr|F1QM37|F1QM37_DANRE	Acetyl-CoA carboxylase beta OS=Danio rerio OX=7955 GN=acacb PE=1 SV=2			0	99	FGSYIVDALR				-0.00350177	1139.59	570.804	1139.6	570.806	2	15	1.1.1.3097.14	31.283	1471.83	733.23	30.85	0.81	3291.06
2	128.04	128.03	56.96	33.03	31.1	tr|F1QM37|F1QM37_DANRE	Acetyl-CoA carboxylase beta OS=Danio rerio OX=7955 GN=acacb PE=1 SV=2			0	99	FGSYIVDALR				-0.00350177	1139.59	570.804	1139.6	570.806	2	12	1.1.1.3098.8	31.3312	1471.83	673.19	30.85	0.81	2713.77
2	128.04	128.03	56.96	33.03	31.1	tr|F1QM37|F1QM37_DANRE	Acetyl-CoA carboxylase beta OS=Danio rerio OX=7955 GN=acacb PE=1 SV=2			0	99	FGSYIVDALR				-0.000316101	1139.6	570.806	1139.6	570.806	2	14	2.1.1.3108.14	30.7841	659.48	481.82	30.99	0.75	1544.21
2	128.04	128.03	56.96	33.03	31.1	tr|F1QM37|F1QM37_DANRE	Acetyl-CoA carboxylase beta OS=Danio rerio OX=7955 GN=acacb PE=1 SV=2			0	99	FGSYIVDALR				-0.000316101	1139.6	570.806	1139.6	570.806	2	12	2.1.1.3110.12	30.8965	659.48	597.28	30.99	0.75	2040.21
2	128.04	128.03	56.96	33.03	31.1	tr|F1QM37|F1QM37_DANRE	Acetyl-CoA carboxylase beta OS=Danio rerio OX=7955 GN=acacb PE=1 SV=2			0	99	FGSYIVDALR				-0.000316101	1139.6	570.806	1139.6	570.806	2	16	2.1.1.3112.15	31.0175	659.48	644.43	30.99	0.75	2291.06
2	128.04	128.03	56.96	33.03	31.1	tr|F1QM37|F1QM37_DANRE	Acetyl-CoA carboxylase beta OS=Danio rerio OX=7955 GN=acacb PE=1 SV=2			0	99	FGSYIVDALR				-0.000316101	1139.6	570.806	1139.6	570.806	2	15	2.1.1.3114.16	31.1353	659.48	562.19	30.99	0.75	2029.41
2	128.04	128.03	56.96	33.03	31.1	tr|F1QM37|F1QM37_DANRE	Acetyl-CoA carboxylase beta OS=Danio rerio OX=7955 GN=acacb PE=1 SV=2			0	99	FGSYIVDALR				-0.000316101	1139.6	570.806	1139.6	570.806	2	14	2.1.1.3116.12	31.2441	659.48	459.38	30.99	0.75	1830.95
2	128.04	128.03	56.96	33.03	31.1	tr|F1QM37|F1QM37_DANRE	Acetyl-CoA carboxylase beta OS=Danio rerio OX=7955 GN=acacb PE=1 SV=2			0	99	FGSYIVDALR				-0.000316101	1139.6	570.806	1139.6	570.806	2	13	2.1.1.3118.13	31.3611	659.48	357.33	30.99	0.75	1807.76
2	128.04	128.03	56.96	33.03	31.1	tr|F1QM37|F1QM37_DANRE	Acetyl-CoA carboxylase beta OS=Danio rerio OX=7955 GN=acacb PE=1 SV=2			0	99	FGSYIVDALR				0.00309005	1139.6	570.808	1139.6	570.806	2	10	1.1.1.3130.8	33.1984	295.53	202.06	32.65	0.93	1373.38
2	128.04	128.03	56.96	33.03	31.1	tr|F1QM37|F1QM37_DANRE	Acetyl-CoA carboxylase beta OS=Danio rerio OX=7955 GN=acacb PE=1 SV=2			0	94.78	FGSYIVDALR				0.00309005	1139.6	570.808	1139.6	570.806	2	9	1.1.1.3128.9	33.0859	295.53	218.18	32.65	0.93	1477.47
2	128.04	128.03	56.96	33.03	31.1	tr|F1QM37|F1QM37_DANRE	Acetyl-CoA carboxylase beta OS=Danio rerio OX=7955 GN=acacb PE=1 SV=2			0	99	FVVMVTPEDLK	Oxidation(M)@4			-0.00445151	1292.66	647.339	1292.67	647.342	2	15	1.1.1.3050.19	28.5742	956.97	939.88	28.71	1.27	3347.95
2	128.04	128.03	56.96	33.03	31.1	tr|F1QM37|F1QM37_DANRE	Acetyl-CoA carboxylase beta OS=Danio rerio OX=7955 GN=acacb PE=1 SV=2			0	99	FVVMVTPEDLK	Oxidation(M)@4			-0.00445151	1292.66	647.339	1292.67	647.342	2	15	1.1.1.3052.23	28.6963	956.97	953.97	28.71	1.27	3344.36
2	128.04	128.03	56.96	33.03	31.1	tr|F1QM37|F1QM37_DANRE	Acetyl-CoA carboxylase beta OS=Danio rerio OX=7955 GN=acacb PE=1 SV=2			0	99	FVVMVTPEDLK	Oxidation(M)@4			-0.00445151	1292.66	647.339	1292.67	647.342	2	16	1.1.1.3054.20	28.807	956.97	902.12	28.71	1.27	3298.96
2	128.04	128.03	56.96	33.03	31.1	tr|F1QM37|F1QM37_DANRE	Acetyl-CoA carboxylase beta OS=Danio rerio OX=7955 GN=acacb PE=1 SV=2			0	99	FVVMVTPEDLK	Oxidation(M)@4			-0.00445151	1292.66	647.339	1292.67	647.342	2	15	1.1.1.3056.17	28.9176	956.97	793.3	28.71	1.27	3070.6
2	128.04	128.03	56.96	33.03	31.1	tr|F1QM37|F1QM37_DANRE	Acetyl-CoA carboxylase beta OS=Danio rerio OX=7955 GN=acacb PE=1 SV=2			0	99	FVVMVTPEDLK	Oxidation(M)@4			-0.00445151	1292.66	647.339	1292.67	647.342	2	15	1.1.1.3058.15	29.0297	956.97	655.02	28.71	1.27	2407.14
2	128.04	128.03	56.96	33.03	31.1	tr|F1QM37|F1QM37_DANRE	Acetyl-CoA carboxylase beta OS=Danio rerio OX=7955 GN=acacb PE=1 SV=2			0	99	FVVMVTPEDLK	Oxidation(M)@4			-0.00445151	1292.66	647.339	1292.67	647.342	2	15	1.1.1.3061.13	29.1996	956.97	551.14	28.71	1.27	2253.87
2	128.04	128.03	56.96	33.03	31.1	tr|F1QM37|F1QM37_DANRE	Acetyl-CoA carboxylase beta OS=Danio rerio OX=7955 GN=acacb PE=1 SV=2			0	99	FVVMVTPEDLK	Oxidation(M)@4			-0.00445151	1292.66	647.339	1292.67	647.342	2	12	1.1.1.3063.17	29.3218	956.97	456.45	28.71	1.27	2270
2	128.04	128.03	56.96	33.03	31.1	tr|F1QM37|F1QM37_DANRE	Acetyl-CoA carboxylase beta OS=Danio rerio OX=7955 GN=acacb PE=1 SV=2			0	99	FVVMVTPEDLK	Oxidation(M)@4			-0.00445151	1292.66	647.339	1292.67	647.342	2	13	1.1.1.3065.19	29.4408	956.97	445.02	28.71	1.27	1939.63
2	128.04	128.03	56.96	33.03	31.1	tr|F1QM37|F1QM37_DANRE	Acetyl-CoA carboxylase beta OS=Danio rerio OX=7955 GN=acacb PE=1 SV=2			0	99	FVVMVTPEDLK	Oxidation(M)@4			-0.00445151	1292.66	647.339	1292.67	647.342	2	12	1.1.1.3067.19	29.5565	956.97	446.1	28.71	1.27	2085.3
2	128.04	128.03	56.96	33.03	31.1	tr|F1QM37|F1QM37_DANRE	Acetyl-CoA carboxylase beta OS=Danio rerio OX=7955 GN=acacb PE=1 SV=2			0	99	FVVMVTPEDLK	Oxidation(M)@4			-0.010433	1292.66	647.336	1292.67	647.342	2	14	1.1.1.3074.11	29.9579	344.47	308.6	30.1	0.46	1897.68
2	128.04	128.03	56.96	33.03	31.1	tr|F1QM37|F1QM37_DANRE	Acetyl-CoA carboxylase beta OS=Danio rerio OX=7955 GN=acacb PE=1 SV=2			0	99	FVVMVTPEDLK	Oxidation(M)@4			-0.0120199	1292.66	647.336	1292.67	647.342	2	14	1.1.1.3085.19	30.5974	310.47	300.18	30.74	0.46	1510.72
2	128.04	128.03	56.96	33.03	31.1	tr|F1QM37|F1QM37_DANRE	Acetyl-CoA carboxylase beta OS=Danio rerio OX=7955 GN=acacb PE=1 SV=2			0	99	FVVMVTPEDLK	Oxidation(M)@4			-0.0120199	1292.66	647.336	1292.67	647.342	2	12	1.1.1.3087.17	30.7097	310.47	304.62	30.74	0.46	1545.01
2	128.04	128.03	56.96	33.03	31.1	tr|F1QM37|F1QM37_DANRE	Acetyl-CoA carboxylase beta OS=Danio rerio OX=7955 GN=acacb PE=1 SV=2			0	99	FVVMVTPEDLK				-0.00276386	1276.67	639.343	1276.67	639.344	2	12	1.1.1.3096.17	31.2302	1054.59	310.35	31.55	0.93	2062.69
2	128.04	128.03	56.96	33.03	31.1	tr|F1QM37|F1QM37_DANRE	Acetyl-CoA carboxylase beta OS=Danio rerio OX=7955 GN=acacb PE=1 SV=2			0	99	FVVMVTPEDLK				-0.00276386	1276.67	639.343	1276.67	639.344	2	14	1.1.1.3098.11	31.3361	1054.59	559.25	31.55	0.93	3014.53
2	128.04	128.03	56.96	33.03	31.1	tr|F1QM37|F1QM37_DANRE	Acetyl-CoA carboxylase beta OS=Danio rerio OX=7955 GN=acacb PE=1 SV=2			0	99	FVVMVTPEDLK				-0.00276386	1276.67	639.343	1276.67	639.344	2	14	1.1.1.3100.15	31.459	1054.59	919.75	31.55	0.93	3854.54
2	128.04	128.03	56.96	33.03	31.1	tr|F1QM37|F1QM37_DANRE	Acetyl-CoA carboxylase beta OS=Danio rerio OX=7955 GN=acacb PE=1 SV=2			0	99	FVVMVTPEDLK				-0.00276386	1276.67	639.343	1276.67	639.344	2	16	1.1.1.3102.19	31.582	1054.59	1049.47	31.55	0.93	4243.26
2	128.04	128.03	56.96	33.03	31.1	tr|F1QM37|F1QM37_DANRE	Acetyl-CoA carboxylase beta OS=Danio rerio OX=7955 GN=acacb PE=1 SV=2			0	99	FVVMVTPEDLK				-0.00276386	1276.67	639.343	1276.67	639.344	2	13	1.1.1.3104.12	31.6865	1054.59	989.91	31.55	0.93	4933.12
2	128.04	128.03	56.96	33.03	31.1	tr|F1QM37|F1QM37_DANRE	Acetyl-CoA carboxylase beta OS=Danio rerio OX=7955 GN=acacb PE=1 SV=2			0	99	FVVMVTPEDLK				-0.00276386	1276.67	639.343	1276.67	639.344	2	14	1.1.1.3106.16	31.8091	1054.59	831.92	31.55	0.93	3601.49
2	128.04	128.03	56.96	33.03	31.1	tr|F1QM37|F1QM37_DANRE	Acetyl-CoA carboxylase beta OS=Danio rerio OX=7955 GN=acacb PE=1 SV=2			0	99	FVVMVTPEDLK				-0.00276386	1276.67	639.343	1276.67	639.344	2	14	1.1.1.3108.15	31.9234	1054.59	682.23	31.55	0.93	2815.06
2	128.04	128.03	56.96	33.03	31.1	tr|F1QM37|F1QM37_DANRE	Acetyl-CoA carboxylase beta OS=Danio rerio OX=7955 GN=acacb PE=1 SV=2			0	99	FVVMVTPEDLK				-0.00276386	1276.67	639.343	1276.67	639.344	2	10	1.1.1.3110.18	32.0446	1054.59	580.18	31.55	0.93	2539.25
2	128.04	128.03	56.96	33.03	31.1	tr|F1QM37|F1QM37_DANRE	Acetyl-CoA carboxylase beta OS=Danio rerio OX=7955 GN=acacb PE=1 SV=2			0	99	FVVMVTPEDLK				-0.00276386	1276.67	639.343	1276.67	639.344	2	16	1.1.1.3112.13	32.1523	1054.59	473.31	31.55	0.93	2630.5
2	128.04	128.03	56.96	33.03	31.1	tr|F1QM37|F1QM37_DANRE	Acetyl-CoA carboxylase beta OS=Danio rerio OX=7955 GN=acacb PE=1 SV=2			0	99	FVVMVTPEDLK				-0.00789083	1276.67	639.34	1276.67	639.344	2	12	1.1.1.3138.10	33.6555	387.23	298.36	33.23	0.75	2352.28
2	128.04	128.03	56.96	33.03	31.1	tr|F1QM37|F1QM37_DANRE	Acetyl-CoA carboxylase beta OS=Danio rerio OX=7955 GN=acacb PE=1 SV=2			0	99	FVVMVTPEDLK				-0.00789083	1276.67	639.34	1276.67	639.344	2	9	1.1.1.3140.14	33.7763	387.23	256.04	33.23	0.75	2038.81
2	128.04	128.03	56.96	33.03	31.1	tr|F1QM37|F1QM37_DANRE	Acetyl-CoA carboxylase beta OS=Danio rerio OX=7955 GN=acacb PE=1 SV=2			0	99	FVVMVTPEDLK				0.0078563	1276.68	639.348	1276.67	639.344	2	10	1.1.1.3147.11	34.1763	414.4	378.89	34.27	1.04	2212.42
2	128.04	128.03	56.96	33.03	31.1	tr|F1QM37|F1QM37_DANRE	Acetyl-CoA carboxylase beta OS=Danio rerio OX=7955 GN=acacb PE=1 SV=2			0	99	FVVMVTPEDLK				-0.00789083	1276.67	639.34	1276.67	639.344	2	9	1.1.1.3131.9	33.2464	387.23	384.03	33.23	0.75	2298.66
2	128.04	128.03	56.96	33.03	31.1	tr|F1QM37|F1QM37_DANRE	Acetyl-CoA carboxylase beta OS=Danio rerio OX=7955 GN=acacb PE=1 SV=2			0	99	FVVMVTPEDLK				0.00714253	1276.68	639.348	1276.67	639.344	2	9	1.1.1.3160.8	34.9258	414.4	244.07	34.27	1.04	1637.83
2	128.04	128.03	56.96	33.03	31.1	tr|F1QM37|F1QM37_DANRE	Acetyl-CoA carboxylase beta OS=Danio rerio OX=7955 GN=acacb PE=1 SV=2			0	98.35	FVVMVTPEDLK				0.0078563	1276.68	639.348	1276.67	639.344	2	10	1.1.1.3151.9	34.4046	414.4	375.58	34.27	1.04	2303.33
2	128.04	128.03	56.96	33.03	31.1	tr|F1QM37|F1QM37_DANRE	Acetyl-CoA carboxylase beta OS=Danio rerio OX=7955 GN=acacb PE=1 SV=2			0	98.3	FVVMVTPEDLK				0.0078563	1276.68	639.348	1276.67	639.344	2	9	1.1.1.3149.10	34.2903	414.4	400.41	34.27	1.04	2192.39
2	128.04	128.03	56.96	33.03	31.1	tr|F1QM37|F1QM37_DANRE	Acetyl-CoA carboxylase beta OS=Danio rerio OX=7955 GN=acacb PE=1 SV=2			0	89.98	FVVMVTPEDLK				0.0078563	1276.68	639.348	1276.67	639.344	2	8	1.1.1.3154.8	34.5784	414.4	372.96	34.27	1.04	2260.2
2	128.04	128.03	56.96	33.03	31.1	tr|F1QM37|F1QM37_DANRE	Acetyl-CoA carboxylase beta OS=Danio rerio OX=7955 GN=acacb PE=1 SV=2			0	88.53	FVVMVTPEDLK				-0.00789083	1276.67	639.34	1276.67	639.344	2	9	1.1.1.3133.12	33.3672	387.23	339.34	33.23	0.75	3249.97
2	128.04	128.03	56.96	33.03	31.1	tr|F1QM37|F1QM37_DANRE	Acetyl-CoA carboxylase beta OS=Danio rerio OX=7955 GN=acacb PE=1 SV=2			0	71.21	FVVMVTPEDLK				-0.00789083	1276.67	639.34	1276.67	639.344	2	10	1.1.1.3135.8	33.4765	387.23	313.51	33.23	0.75	3529.02
2	128.04	128.03	56.96	33.03	31.1	tr|F1QM37|F1QM37_DANRE	Acetyl-CoA carboxylase beta OS=Danio rerio OX=7955 GN=acacb PE=1 SV=2			0	70.81	FVVMVTPEDLK				-0.00276386	1276.67	639.343	1276.67	639.344	2	7	1.1.1.3108.16	31.9251	1054.59	681.77	31.55	0.93	1797.06
2	128.04	128.03	56.96	33.03	31.1	tr|F1QM37|F1QM37_DANRE	Acetyl-CoA carboxylase beta OS=Danio rerio OX=7955 GN=acacb PE=1 SV=2			0	34.22	FVVMVTPEDLK				0.00714253	1276.68	639.348	1276.67	639.344	2	6	1.1.1.3159.7	34.8646	414.4	259.17	34.27	1.04	1388.16
2	128.04	128.03	56.96	33.03	31.1	tr|F1QM37|F1QM37_DANRE	Acetyl-CoA carboxylase beta OS=Danio rerio OX=7955 GN=acacb PE=1 SV=2			0	87.7	GGVLEAEGTVEIK				0.0060559	1300.69	651.354	1300.69	651.351	2	8	1.1.1.3061.14	29.203	212.71	178.64	29.29	0.98	1230.19
2	128.04	128.03	56.96	33.03	31.1	tr|F1QM37|F1QM37_DANRE	Acetyl-CoA carboxylase beta OS=Danio rerio OX=7955 GN=acacb PE=1 SV=2			0	73.21	GGVLEAEGTVEIK				-0.0104237	1300.68	651.346	1300.69	651.351	2	7	1.1.1.3048.24	28.4669	279.8	225.29	28.2	1.21	1438.83
2	128.04	128.03	56.96	33.03	31.1	tr|F1QM37|F1QM37_DANRE	Acetyl-CoA carboxylase beta OS=Danio rerio OX=7955 GN=acacb PE=1 SV=2			0	99	GSGTIAGETSQAYK				-0.000788821	1368.65	685.333	1368.65	685.333	2	18	1.1.1.2846.29	16.8387	1248.22	983.27	16.96	0.34	3685.58
2	128.04	128.03	56.96	33.03	31.1	tr|F1QM37|F1QM37_DANRE	Acetyl-CoA carboxylase beta OS=Danio rerio OX=7955 GN=acacb PE=1 SV=2			0	99	GSGTIAGETSQAYK				-0.000788821	1368.65	685.333	1368.65	685.333	2	20	1.1.1.2848.27	16.9506	1248.22	1242.85	16.96	0.34	5446.92
2	128.04	128.03	56.96	33.03	31.1	tr|F1QM37|F1QM37_DANRE	Acetyl-CoA carboxylase beta OS=Danio rerio OX=7955 GN=acacb PE=1 SV=2			0	99	GSGTIAGETSQAYK				-0.000788821	1368.65	685.333	1368.65	685.333	2	20	1.1.1.2852.29	17.1816	1248.22	522.71	16.96	0.34	2307.47
2	128.04	128.03	56.96	33.03	31.1	tr|F1QM37|F1QM37_DANRE	Acetyl-CoA carboxylase beta OS=Danio rerio OX=7955 GN=acacb PE=1 SV=2			0	99	GSGTIAGETSQAYK				-0.000788821	1368.65	685.333	1368.65	685.333	2	17	1.1.1.2854.26	17.2915	1248.22	404.76	16.96	0.34	1939.03
2	128.04	128.03	56.96	33.03	31.1	tr|F1QM37|F1QM37_DANRE	Acetyl-CoA carboxylase beta OS=Danio rerio OX=7955 GN=acacb PE=1 SV=2			0	99	GSGTIAGETSQAYK				-0.000788821	1368.65	685.333	1368.65	685.333	2	14	1.1.1.2859.31	17.5884	1248.22	316.49	16.96	0.34	1339.25
2	128.04	128.03	56.96	33.03	31.1	tr|F1QM37|F1QM37_DANRE	Acetyl-CoA carboxylase beta OS=Danio rerio OX=7955 GN=acacb PE=1 SV=2			0	99	GSGTIAGETSQAYK				-0.0061283	1368.65	685.33	1368.65	685.333	2	16	2.1.1.2871.29	17.1442	368.13	362.15	17.15	0.69	1257.47
2	128.04	128.03	56.96	33.03	31.1	tr|F1QM37|F1QM37_DANRE	Acetyl-CoA carboxylase beta OS=Danio rerio OX=7955 GN=acacb PE=1 SV=2			0	99	GSGTIAGETSQAYK				-0.0061283	1368.65	685.33	1368.65	685.333	2	13	2.1.1.2873.25	17.2526	368.13	296.39	17.15	0.69	1123.1
2	128.04	128.03	56.96	33.03	31.1	tr|F1QM37|F1QM37_DANRE	Acetyl-CoA carboxylase beta OS=Danio rerio OX=7955 GN=acacb PE=1 SV=2			0	99	HMFQVAWIDPEDPYK	Oxidation(M)@2			-0.00470825	1890.86	631.293	1890.86	631.294	3	13	1.1.1.3134.5	33.4202	252.13	235.19	33.52	1.62	1413.58
2	128.04	128.03	56.96	33.03	31.1	tr|F1QM37|F1QM37_DANRE	Acetyl-CoA carboxylase beta OS=Danio rerio OX=7955 GN=acacb PE=1 SV=2			0	99	HMFQVAWIDPEDPYK	Oxidation(M)@2			-0.00470825	1890.86	631.293	1890.86	631.294	3	13	1.1.1.3140.13	33.7747	252.13	205.09	33.52	1.62	1494.82
2	128.04	128.03	56.96	33.03	31.1	tr|F1QM37|F1QM37_DANRE	Acetyl-CoA carboxylase beta OS=Danio rerio OX=7955 GN=acacb PE=1 SV=2			0	99	HMFQVAWIDPEDPYK	Oxidation(M)@2			-0.00470825	1890.86	631.293	1890.86	631.294	3	9	1.1.1.3145.11	34.0606	252.13	146.88	33.52	1.62	1297.06
2	128.04	128.03	56.96	33.03	31.1	tr|F1QM37|F1QM37_DANRE	Acetyl-CoA carboxylase beta OS=Danio rerio OX=7955 GN=acacb PE=1 SV=2			0	98.47	HMFQVAWIDPEDPYK				0.0131424	1874.88	625.967	1874.87	625.963	3	10	1.1.1.3226.6	38.7438	141.89	92.73	38.15	1.16	1138.34
2	128.04	128.03	56.96	33.03	31.1	tr|F1QM37|F1QM37_DANRE	Acetyl-CoA carboxylase beta OS=Danio rerio OX=7955 GN=acacb PE=1 SV=2			0	99	IANILDSHAATLQR				-0.00189592	1521.82	508.282	1521.83	508.283	3	16	1.1.1.2960.11	23.3629	1415.18	1079.6	23.46	0.58	4747.56
2	128.04	128.03	56.96	33.03	31.1	tr|F1QM37|F1QM37_DANRE	Acetyl-CoA carboxylase beta OS=Danio rerio OX=7955 GN=acacb PE=1 SV=2			0	99	IANILDSHAATLQR				-0.00189592	1521.82	508.282	1521.83	508.283	3	18	1.1.1.2962.15	23.485	1415.18	1390.76	23.46	0.58	5899.23
2	128.04	128.03	56.96	33.03	31.1	tr|F1QM37|F1QM37_DANRE	Acetyl-CoA carboxylase beta OS=Danio rerio OX=7955 GN=acacb PE=1 SV=2			0	99	IANILDSHAATLQR				-0.00189592	1521.82	508.282	1521.83	508.283	3	18	1.1.1.2964.13	23.597	1415.18	1123.2	23.46	0.58	5756.95
2	128.04	128.03	56.96	33.03	31.1	tr|F1QM37|F1QM37_DANRE	Acetyl-CoA carboxylase beta OS=Danio rerio OX=7955 GN=acacb PE=1 SV=2			0	99	IANILDSHAATLQR				-0.00189592	1521.82	508.282	1521.83	508.283	3	15	1.1.1.2966.11	23.709	1415.18	869.56	23.46	0.58	4390.03
2	128.04	128.03	56.96	33.03	31.1	tr|F1QM37|F1QM37_DANRE	Acetyl-CoA carboxylase beta OS=Danio rerio OX=7955 GN=acacb PE=1 SV=2			0	99	IANILDSHAATLQR				-0.00189592	1521.82	508.282	1521.83	508.283	3	13	1.1.1.2968.14	23.8295	1415.18	724.5	23.46	0.58	3601.09
2	128.04	128.03	56.96	33.03	31.1	tr|F1QM37|F1QM37_DANRE	Acetyl-CoA carboxylase beta OS=Danio rerio OX=7955 GN=acacb PE=1 SV=2			0	99	IANILDSHAATLQR				-0.00189592	1521.82	508.282	1521.83	508.283	3	13	1.1.1.2972.12	24.0576	1415.18	434	23.46	0.58	2557.31
2	128.04	128.03	56.96	33.03	31.1	tr|F1QM37|F1QM37_DANRE	Acetyl-CoA carboxylase beta OS=Danio rerio OX=7955 GN=acacb PE=1 SV=2			0	99	IANILDSHAATLQR				-0.00501822	1521.82	508.281	1521.83	508.283	3	13	2.1.1.2981.13	23.4518	858.35	705.35	23.6	0.52	5104.99
2	128.04	128.03	56.96	33.03	31.1	tr|F1QM37|F1QM37_DANRE	Acetyl-CoA carboxylase beta OS=Danio rerio OX=7955 GN=acacb PE=1 SV=2			0	99	IANILDSHAATLQR				-0.00501822	1521.82	508.281	1521.83	508.283	3	15	2.1.1.2983.14	23.5688	858.35	856.69	23.6	0.52	5506.12
2	128.04	128.03	56.96	33.03	31.1	tr|F1QM37|F1QM37_DANRE	Acetyl-CoA carboxylase beta OS=Danio rerio OX=7955 GN=acacb PE=1 SV=2			0	99	IANILDSHAATLQR				-0.00501822	1521.82	508.281	1521.83	508.283	3	16	2.1.1.2985.13	23.6825	858.35	730.73	23.6	0.52	5327.98
2	128.04	128.03	56.96	33.03	31.1	tr|F1QM37|F1QM37_DANRE	Acetyl-CoA carboxylase beta OS=Danio rerio OX=7955 GN=acacb PE=1 SV=2			0	99	IANILDSHAATLQR				-0.00501822	1521.82	508.281	1521.83	508.283	3	16	2.1.1.2987.14	23.7996	858.35	508.69	23.6	0.52	4059.1
2	128.04	128.03	56.96	33.03	31.1	tr|F1QM37|F1QM37_DANRE	Acetyl-CoA carboxylase beta OS=Danio rerio OX=7955 GN=acacb PE=1 SV=2			0	99	IANILDSHAATLQR				-0.00501822	1521.82	508.281	1521.83	508.283	3	14	2.1.1.2989.16	23.9181	858.35	378.32	23.6	0.52	3755.86
2	128.04	128.03	56.96	33.03	31.1	tr|F1QM37|F1QM37_DANRE	Acetyl-CoA carboxylase beta OS=Danio rerio OX=7955 GN=acacb PE=1 SV=2			0	99	IANILDSHAATLQR				-0.00189592	1521.82	508.282	1521.83	508.283	3	12	1.1.1.2980.15	24.5246	1415.18	304.29	23.46	0.58	2191.08
2	128.04	128.03	56.96	33.03	31.1	tr|F1QM37|F1QM37_DANRE	Acetyl-CoA carboxylase beta OS=Danio rerio OX=7955 GN=acacb PE=1 SV=2			0	99	IANILDSHAATLQR				-0.00501822	1521.82	508.281	1521.83	508.283	3	13	2.1.1.2979.15	23.3402	858.35	395.34	23.6	0.52	4009.14
2	128.04	128.03	56.96	33.03	31.1	tr|F1QM37|F1QM37_DANRE	Acetyl-CoA carboxylase beta OS=Danio rerio OX=7955 GN=acacb PE=1 SV=2			0	99	IANILDSHAATLQR				-0.00501822	1521.82	508.281	1521.83	508.283	3	13	2.1.1.2991.17	24.0353	858.35	285.46	23.6	0.52	3461.42
2	128.04	128.03	56.96	33.03	31.1	tr|F1QM37|F1QM37_DANRE	Acetyl-CoA carboxylase beta OS=Danio rerio OX=7955 GN=acacb PE=1 SV=2			0	99	IANILDSHAATLQR				-0.00501822	1521.82	508.281	1521.83	508.283	3	13	2.1.1.2993.17	24.1509	858.35	273.95	23.6	0.52	3108.39
2	128.04	128.03	56.96	33.03	31.1	tr|F1QM37|F1QM37_DANRE	Acetyl-CoA carboxylase beta OS=Danio rerio OX=7955 GN=acacb PE=1 SV=2			0	99	IANILDSHAATLQR				-0.00189592	1521.82	508.282	1521.83	508.283	3	12	1.1.1.2974.15	24.178	1415.18	365.16	23.46	0.58	2628.39
2	128.04	128.03	56.96	33.03	31.1	tr|F1QM37|F1QM37_DANRE	Acetyl-CoA carboxylase beta OS=Danio rerio OX=7955 GN=acacb PE=1 SV=2			0	99	IANILDSHAATLQR				-0.00189592	1521.82	508.282	1521.83	508.283	3	10	1.1.1.2976.14	24.2918	1415.18	325.25	23.46	0.58	2372.06
2	128.04	128.03	56.96	33.03	31.1	tr|F1QM37|F1QM37_DANRE	Acetyl-CoA carboxylase beta OS=Danio rerio OX=7955 GN=acacb PE=1 SV=2			0	99	IANILDSHAATLQR				-0.00189592	1521.82	508.282	1521.83	508.283	3	11	1.1.1.2978.13	24.4056	1415.18	276.95	23.46	0.58	2267.76
2	128.04	128.03	56.96	33.03	31.1	tr|F1QM37|F1QM37_DANRE	Acetyl-CoA carboxylase beta OS=Danio rerio OX=7955 GN=acacb PE=1 SV=2			0	99	IANILDSHAATLQR				-0.00189592	1521.82	508.282	1521.83	508.283	3	10	1.1.1.2982.15	24.6401	1415.18	285.5	23.46	0.58	2226.78
2	128.04	128.03	56.96	33.03	31.1	tr|F1QM37|F1QM37_DANRE	Acetyl-CoA carboxylase beta OS=Danio rerio OX=7955 GN=acacb PE=1 SV=2			0	99	IANILDSHAATLQR				-0.00189592	1521.82	508.282	1521.83	508.283	3	10	1.1.1.2970.12	23.9418	1415.18	497.48	23.46	0.58	2916.05
2	128.04	128.03	56.96	33.03	31.1	tr|F1QM37|F1QM37_DANRE	Acetyl-CoA carboxylase beta OS=Danio rerio OX=7955 GN=acacb PE=1 SV=2			0	99	IANILDSHAATLQR				-0.00501822	1521.82	508.281	1521.83	508.283	3	10	2.1.1.2996.13	24.3174	858.35	245.73	23.6	0.52	2602.4
2	128.04	128.03	56.96	33.03	31.1	tr|F1QM37|F1QM37_DANRE	Acetyl-CoA carboxylase beta OS=Danio rerio OX=7955 GN=acacb PE=1 SV=2			0	98.68	IANILDSHAATLQR				-0.00189592	1521.82	508.282	1521.83	508.283	3	10	1.1.1.2991.14	25.1582	1415.18	206.97	23.46	0.58	2223.87
2	128.04	128.03	56.96	33.03	31.1	tr|F1QM37|F1QM37_DANRE	Acetyl-CoA carboxylase beta OS=Danio rerio OX=7955 GN=acacb PE=1 SV=2			0	93.52	IANILDSHAATLQR				-0.00189592	1521.82	508.282	1521.83	508.283	3	9	1.1.1.2984.16	24.7573	1415.18	242.02	23.46	0.58	2083.7
2	128.04	128.03	56.96	33.03	31.1	tr|F1QM37|F1QM37_DANRE	Acetyl-CoA carboxylase beta OS=Danio rerio OX=7955 GN=acacb PE=1 SV=2			0	93.4	IANILDSHAATLQR				-0.00501822	1521.82	508.281	1521.83	508.283	3	10	2.1.1.2984.21	23.6381	858.35	807.71	23.6	0.52	3839.14
2	128.04	128.03	56.96	33.03	31.1	tr|F1QM37|F1QM37_DANRE	Acetyl-CoA carboxylase beta OS=Danio rerio OX=7955 GN=acacb PE=1 SV=2			0	80.28	IANILDSHAATLQR				-0.00189592	1521.82	508.282	1521.83	508.283	3	9	1.1.1.2956.14	23.1372	1415.18	244.98	23.46	0.58	2297.46
2	128.04	128.03	56.96	33.03	31.1	tr|F1QM37|F1QM37_DANRE	Acetyl-CoA carboxylase beta OS=Danio rerio OX=7955 GN=acacb PE=1 SV=2			0	74.66	IANILDSHAATLQR				-0.00189592	1521.82	508.282	1521.83	508.283	3	8	1.1.1.2986.15	24.8711	1415.18	224.6	23.46	0.58	2088.7
2	128.04	128.03	56.96	33.03	31.1	tr|F1QM37|F1QM37_DANRE	Acetyl-CoA carboxylase beta OS=Danio rerio OX=7955 GN=acacb PE=1 SV=2			0	71.34	IANILDSHAATLQR	Deamidated(N)@3			0.0114521	1522.82	508.615	1522.81	508.611	3	9	2.1.1.2992.15	24.0898	192.16	189.47	24.18	1.1	2586.81
2	128.04	128.03	56.96	33.03	31.1	tr|F1QM37|F1QM37_DANRE	Acetyl-CoA carboxylase beta OS=Danio rerio OX=7955 GN=acacb PE=1 SV=2			0	62.47	IANILDSHAATLQR				-0.00501822	1521.82	508.281	1521.83	508.283	3	9	2.1.1.2982.19	23.5195	858.35	824.05	23.6	0.52	3947.12
2	128.04	128.03	56.96	33.03	31.1	tr|F1QM37|F1QM37_DANRE	Acetyl-CoA carboxylase beta OS=Danio rerio OX=7955 GN=acacb PE=1 SV=2			0	59.16	IANILDSHAATLQR				-0.00501822	1521.82	508.281	1521.83	508.283	3	10	2.1.1.2980.15	23.3976	858.35	558.4	23.6	0.52	3806.75
2	128.04	128.03	56.96	33.03	31.1	tr|F1QM37|F1QM37_DANRE	Acetyl-CoA carboxylase beta OS=Danio rerio OX=7955 GN=acacb PE=1 SV=2			0	44.15	IANILDSHAATLQR				-0.00189592	1521.82	508.282	1521.83	508.283	3	7	1.1.1.2988.12	24.9816	1415.18	205.69	23.46	0.58	2076.1
2	128.04	128.03	56.96	33.03	31.1	tr|F1QM37|F1QM37_DANRE	Acetyl-CoA carboxylase beta OS=Danio rerio OX=7955 GN=acacb PE=1 SV=2			0	39.98	IANILDSHAATLQR				-0.00189592	1521.82	508.282	1521.83	508.283	3	7	1.1.1.2994.13	25.3297	1415.18	164.52	23.46	0.58	1950.63
2	128.04	128.03	56.96	33.03	31.1	tr|F1QM37|F1QM37_DANRE	Acetyl-CoA carboxylase beta OS=Danio rerio OX=7955 GN=acacb PE=1 SV=2			0	22.95	IANILDSHAATLQR				0.0139427	1521.84	508.287	1521.83	508.283	3	8	1.1.1.3001.13	25.7334	174.86	170.25	25.71	0.46	1882.14
2	128.04	128.03	56.96	33.03	31.1	tr|F1QM37|F1QM37_DANRE	Acetyl-CoA carboxylase beta OS=Danio rerio OX=7955 GN=acacb PE=1 SV=2			0	17.56	IANILDSHAATLQR				-0.00501822	1521.82	508.281	1521.83	508.283	3	9	2.1.1.2988.17	23.8621	858.35	439.97	23.6	0.52	3107.39
2	128.04	128.03	56.96	33.03	31.1	tr|F1QM37|F1QM37_DANRE	Acetyl-CoA carboxylase beta OS=Danio rerio OX=7955 GN=acacb PE=1 SV=2			0	15.27	IANILDSHAATLQR				-0.00501822	1521.82	508.281	1521.83	508.283	3	7	2.1.1.2990.13	23.9709	858.35	324.39	23.6	0.52	3017.21
2	128.04	128.03	56.96	33.03	31.1	tr|F1QM37|F1QM37_DANRE	Acetyl-CoA carboxylase beta OS=Danio rerio OX=7955 GN=acacb PE=1 SV=2			0	77.37	IDPVYSR				-0.00860727	848.431	425.223	848.439	425.227	2	7	1.1.1.2849.9	16.9776	486.64	424.24	16.9	1.44	5071.98
2	128.04	128.03	56.96	33.03	31.1	tr|F1QM37|F1QM37_DANRE	Acetyl-CoA carboxylase beta OS=Danio rerio OX=7955 GN=acacb PE=1 SV=2			0	68.54	IDPVYSR				-0.00860727	848.431	425.223	848.439	425.227	2	6	1.1.1.2847.10	16.8647	486.64	478.31	16.9	1.44	5377.97
2	128.04	128.03	56.96	33.03	31.1	tr|F1QM37|F1QM37_DANRE	Acetyl-CoA carboxylase beta OS=Danio rerio OX=7955 GN=acacb PE=1 SV=2			0	32.73	IDPVYSR				-0.00860727	848.431	425.223	848.439	425.227	2	6	1.1.1.2851.9	17.0913	486.64	322.03	16.9	1.44	3938.13
2	128.04	128.03	56.96	33.03	31.1	tr|F1QM37|F1QM37_DANRE	Acetyl-CoA carboxylase beta OS=Danio rerio OX=7955 GN=acacb PE=1 SV=2			0	99	IGLAEEIR				-0.00233064	899.505	450.76	899.508	450.761	2	13	1.1.1.2918.9	20.9355	1254.91	1066.04	21.09	0.64	7411.93
2	128.04	128.03	56.96	33.03	31.1	tr|F1QM37|F1QM37_DANRE	Acetyl-CoA carboxylase beta OS=Danio rerio OX=7955 GN=acacb PE=1 SV=2			0	99	IGLAEEIR				0.000600979	899.508	450.761	899.508	450.761	2	11	1.1.1.2932.9	21.7438	1254.91	414.78	21.09	0.64	4028.81
2	128.04	128.03	56.96	33.03	31.1	tr|F1QM37|F1QM37_DANRE	Acetyl-CoA carboxylase beta OS=Danio rerio OX=7955 GN=acacb PE=1 SV=2			0	99	IGLAEEIR				0.00172598	899.509	450.762	899.508	450.761	2	13	2.1.1.2944.8	21.3101	488.55	487.01	21.35	0.81	4624
2	128.04	128.03	56.96	33.03	31.1	tr|F1QM37|F1QM37_DANRE	Acetyl-CoA carboxylase beta OS=Danio rerio OX=7955 GN=acacb PE=1 SV=2			0	99	IGLAEEIR				0.000600979	899.508	450.761	899.508	450.761	2	12	1.1.1.2920.9	21.051	1254.91	1247.75	21.09	0.64	9324.74
2	128.04	128.03	56.96	33.03	31.1	tr|F1QM37|F1QM37_DANRE	Acetyl-CoA carboxylase beta OS=Danio rerio OX=7955 GN=acacb PE=1 SV=2			0	99	IGLAEEIR				0.000600979	899.508	450.761	899.508	450.761	2	13	1.1.1.2922.10	21.168	1254.91	1148.93	21.09	0.64	8103.29
2	128.04	128.03	56.96	33.03	31.1	tr|F1QM37|F1QM37_DANRE	Acetyl-CoA carboxylase beta OS=Danio rerio OX=7955 GN=acacb PE=1 SV=2			0	99	IGLAEEIR				0.000600979	899.508	450.761	899.508	450.761	2	12	1.1.1.2924.9	21.282	1254.91	887.84	21.09	0.64	7074.7
2	128.04	128.03	56.96	33.03	31.1	tr|F1QM37|F1QM37_DANRE	Acetyl-CoA carboxylase beta OS=Danio rerio OX=7955 GN=acacb PE=1 SV=2			0	99	IGLAEEIR				0.000600979	899.508	450.761	899.508	450.761	2	12	1.1.1.2926.9	21.3975	1254.91	718.35	21.09	0.64	5406.77
2	128.04	128.03	56.96	33.03	31.1	tr|F1QM37|F1QM37_DANRE	Acetyl-CoA carboxylase beta OS=Danio rerio OX=7955 GN=acacb PE=1 SV=2			0	99	IGLAEEIR				0.000600979	899.508	450.761	899.508	450.761	2	13	1.1.1.2928.11	21.5162	1254.91	578.28	21.09	0.64	4568.8
2	128.04	128.03	56.96	33.03	31.1	tr|F1QM37|F1QM37_DANRE	Acetyl-CoA carboxylase beta OS=Danio rerio OX=7955 GN=acacb PE=1 SV=2			0	99	IGLAEEIR				0.000600979	899.508	450.761	899.508	450.761	2	13	1.1.1.2930.9	21.6285	1254.91	515.88	21.09	0.64	4329.66
2	128.04	128.03	56.96	33.03	31.1	tr|F1QM37|F1QM37_DANRE	Acetyl-CoA carboxylase beta OS=Danio rerio OX=7955 GN=acacb PE=1 SV=2			0	99	IGLAEEIR				0.00172598	899.509	450.762	899.508	450.761	2	11	2.1.1.2940.7	21.0776	488.55	358.22	21.35	0.81	3591.21
2	128.04	128.03	56.96	33.03	31.1	tr|F1QM37|F1QM37_DANRE	Acetyl-CoA carboxylase beta OS=Danio rerio OX=7955 GN=acacb PE=1 SV=2			0	99	IGLAEEIR				0.000600979	899.508	450.761	899.508	450.761	2	11	1.1.1.2935.7	21.9138	1254.91	377.39	21.09	0.64	3530.51
2	128.04	128.03	56.96	33.03	31.1	tr|F1QM37|F1QM37_DANRE	Acetyl-CoA carboxylase beta OS=Danio rerio OX=7955 GN=acacb PE=1 SV=2			0	99	IGLAEEIR				0.000600979	899.508	450.761	899.508	450.761	2	12	1.1.1.2939.7	22.1448	1254.91	310.56	21.09	0.64	3330.06
2	128.04	128.03	56.96	33.03	31.1	tr|F1QM37|F1QM37_DANRE	Acetyl-CoA carboxylase beta OS=Danio rerio OX=7955 GN=acacb PE=1 SV=2			0	99	IGLAEEIR				0.000600979	899.508	450.761	899.508	450.761	2	12	1.1.1.2937.8	22.031	1254.91	357.31	21.09	0.64	3360.16
2	128.04	128.03	56.96	33.03	31.1	tr|F1QM37|F1QM37_DANRE	Acetyl-CoA carboxylase beta OS=Danio rerio OX=7955 GN=acacb PE=1 SV=2			0	99	IGLAEEIR				0.00172598	899.509	450.762	899.508	450.761	2	10	2.1.1.2942.6	21.1913	488.55	427.16	21.35	0.81	4423.03
2	128.04	128.03	56.96	33.03	31.1	tr|F1QM37|F1QM37_DANRE	Acetyl-CoA carboxylase beta OS=Danio rerio OX=7955 GN=acacb PE=1 SV=2			0	99	IGLAEEIR				0.00172598	899.509	450.762	899.508	450.761	2	10	2.1.1.2947.12	21.4899	488.55	362.89	21.35	0.81	3761.53
2	128.04	128.03	56.96	33.03	31.1	tr|F1QM37|F1QM37_DANRE	Acetyl-CoA carboxylase beta OS=Danio rerio OX=7955 GN=acacb PE=1 SV=2			0	99	IGLAEEIR				-0.000802829	899.507	450.761	899.508	450.761	2	10	1.1.1.2947.5	22.6029	278.01	272.73	22.59	0.63	2874.24
2	128.04	128.03	56.96	33.03	31.1	tr|F1QM37|F1QM37_DANRE	Acetyl-CoA carboxylase beta OS=Danio rerio OX=7955 GN=acacb PE=1 SV=2			0	98.84	IGLAEEIR				0.00172598	899.509	450.762	899.508	450.761	2	10	2.1.1.2950.8	21.6564	488.55	356.47	21.35	0.81	3445.06
2	128.04	128.03	56.96	33.03	31.1	tr|F1QM37|F1QM37_DANRE	Acetyl-CoA carboxylase beta OS=Danio rerio OX=7955 GN=acacb PE=1 SV=2			0	98.58	IGLAEEIR				0.000600979	899.508	450.761	899.508	450.761	2	10	1.1.1.2943.7	22.3756	1254.91	246.56	21.09	0.64	2946.54
2	128.04	128.03	56.96	33.03	31.1	tr|F1QM37|F1QM37_DANRE	Acetyl-CoA carboxylase beta OS=Danio rerio OX=7955 GN=acacb PE=1 SV=2			0	98.4	IGLAEEIR				-0.00159629	899.506	450.76	899.508	450.761	2	10	1.1.1.2959.7	23.2985	206.92	190.22	23.11	1.15	2072.92
2	128.04	128.03	56.96	33.03	31.1	tr|F1QM37|F1QM37_DANRE	Acetyl-CoA carboxylase beta OS=Danio rerio OX=7955 GN=acacb PE=1 SV=2			0	98.31	IGLAEEIR				0.00251944	899.51	450.762	899.508	450.761	2	10	2.1.1.2953.10	21.8326	274.66	262.64	21.87	0.69	2924.84
2	128.04	128.03	56.96	33.03	31.1	tr|F1QM37|F1QM37_DANRE	Acetyl-CoA carboxylase beta OS=Danio rerio OX=7955 GN=acacb PE=1 SV=2			0	93.29	IGLAEEIR				-0.00660117	899.501	450.758	899.508	450.761	2	8	1.1.1.2999.8	25.6097	121.33	117.78	25.59	0.58	1583.52
2	128.04	128.03	56.96	33.03	31.1	tr|F1QM37|F1QM37_DANRE	Acetyl-CoA carboxylase beta OS=Danio rerio OX=7955 GN=acacb PE=1 SV=2			0	99	IGYPVVIK				0.000236332	887.548	444.781	887.548	444.781	2	12	1.1.1.2967.9	23.7633	840.03	819.97	23.8	0.58	6932.21
2	128.04	128.03	56.96	33.03	31.1	tr|F1QM37|F1QM37_DANRE	Acetyl-CoA carboxylase beta OS=Danio rerio OX=7955 GN=acacb PE=1 SV=2			0	99	IGYPVVIK				0.000236332	887.548	444.781	887.548	444.781	2	12	1.1.1.2971.9	23.9948	840.03	551.41	23.8	0.58	4903.74
2	128.04	128.03	56.96	33.03	31.1	tr|F1QM37|F1QM37_DANRE	Acetyl-CoA carboxylase beta OS=Danio rerio OX=7955 GN=acacb PE=1 SV=2			0	99	IGYPVVIK				0.000236332	887.548	444.781	887.548	444.781	2	11	1.1.1.2965.8	23.6464	840.03	701.4	23.8	0.58	6634.19
2	128.04	128.03	56.96	33.03	31.1	tr|F1QM37|F1QM37_DANRE	Acetyl-CoA carboxylase beta OS=Danio rerio OX=7955 GN=acacb PE=1 SV=2			0	99	IGYPVVIK				0.000236332	887.548	444.781	887.548	444.781	2	10	1.1.1.2973.8	24.1087	840.03	418.29	23.8	0.58	3829.85
2	128.04	128.03	56.96	33.03	31.1	tr|F1QM37|F1QM37_DANRE	Acetyl-CoA carboxylase beta OS=Danio rerio OX=7955 GN=acacb PE=1 SV=2			0	99	IGYPVVIK				-0.000982289	887.547	444.781	887.548	444.781	2	11	2.1.1.2987.8	23.7896	361.25	345.24	23.83	0.75	8784.15
2	128.04	128.03	56.96	33.03	31.1	tr|F1QM37|F1QM37_DANRE	Acetyl-CoA carboxylase beta OS=Danio rerio OX=7955 GN=acacb PE=1 SV=2			0	99	IGYPVVIK				0.000236332	887.548	444.781	887.548	444.781	2	10	1.1.1.2977.8	24.3396	840.03	307.76	23.8	0.58	3186.98
2	128.04	128.03	56.96	33.03	31.1	tr|F1QM37|F1QM37_DANRE	Acetyl-CoA carboxylase beta OS=Danio rerio OX=7955 GN=acacb PE=1 SV=2			0	99	IGYPVVIK				0.000236332	887.548	444.781	887.548	444.781	2	10	1.1.1.2963.10	23.5343	840.03	481.82	23.8	0.58	4444.42
2	128.04	128.03	56.96	33.03	31.1	tr|F1QM37|F1QM37_DANRE	Acetyl-CoA carboxylase beta OS=Danio rerio OX=7955 GN=acacb PE=1 SV=2			0	99	IGYPVVIK				0.000236332	887.548	444.781	887.548	444.781	2	10	1.1.1.2975.7	24.2225	840.03	336.65	23.8	0.58	3721.87
2	128.04	128.03	56.96	33.03	31.1	tr|F1QM37|F1QM37_DANRE	Acetyl-CoA carboxylase beta OS=Danio rerio OX=7955 GN=acacb PE=1 SV=2			0	99	IGYPVVIK				-0.000982289	887.547	444.781	887.548	444.781	2	11	2.1.1.2991.10	24.0236	361.25	298.28	23.83	0.75	4709.77
2	128.04	128.03	56.96	33.03	31.1	tr|F1QM37|F1QM37_DANRE	Acetyl-CoA carboxylase beta OS=Danio rerio OX=7955 GN=acacb PE=1 SV=2			0	99	IGYPVVIK				0.000236332	887.548	444.781	887.548	444.781	2	9	1.1.1.2980.7	24.5113	840.03	263.71	23.8	0.58	2963.51
2	128.04	128.03	56.96	33.03	31.1	tr|F1QM37|F1QM37_DANRE	Acetyl-CoA carboxylase beta OS=Danio rerio OX=7955 GN=acacb PE=1 SV=2			0	99	IGYPVVIK				-0.000982289	887.547	444.781	887.548	444.781	2	9	2.1.1.2993.11	24.1409	361.25	249.1	23.83	0.75	4385.23
2	128.04	128.03	56.96	33.03	31.1	tr|F1QM37|F1QM37_DANRE	Acetyl-CoA carboxylase beta OS=Danio rerio OX=7955 GN=acacb PE=1 SV=2			0	97.62	IGYPVVIK				-0.000982289	887.547	444.781	887.548	444.781	2	8	2.1.1.2989.9	23.9064	361.25	347.66	23.83	0.75	8058.3
2	128.04	128.03	56.96	33.03	31.1	tr|F1QM37|F1QM37_DANRE	Acetyl-CoA carboxylase beta OS=Danio rerio OX=7955 GN=acacb PE=1 SV=2			0	95.84	IGYPVVIK				-0.000982289	887.547	444.781	887.548	444.781	2	8	2.1.1.2985.9	23.6758	361.25	270.95	23.83	0.75	6784.56
2	128.04	128.03	56.96	33.03	31.1	tr|F1QM37|F1QM37_DANRE	Acetyl-CoA carboxylase beta OS=Danio rerio OX=7955 GN=acacb PE=1 SV=2			0	49.55	IPVTVEK				-0.00173393	784.468	393.241	784.469	393.242	2	10	1.1.1.2840.6	16.4557	852.27	753.01	16.39	0.57	7650.57
2	128.04	128.03	56.96	33.03	31.1	tr|F1QM37|F1QM37_DANRE	Acetyl-CoA carboxylase beta OS=Danio rerio OX=7955 GN=acacb PE=1 SV=2			0	30.96	IPVTVEK				-0.00173393	784.468	393.241	784.469	393.242	2	8	1.1.1.2844.7	16.6868	852.27	428.97	16.39	0.57	4585.99
2	128.04	128.03	56.96	33.03	31.1	tr|F1QM37|F1QM37_DANRE	Acetyl-CoA carboxylase beta OS=Danio rerio OX=7955 GN=acacb PE=1 SV=2			0	30.88	IPVTVEK				-0.00173393	784.468	393.241	784.469	393.242	2	8	1.1.1.2836.5	16.2254	852.27	573.17	16.39	0.57	5609.5
2	128.04	128.03	56.96	33.03	31.1	tr|F1QM37|F1QM37_DANRE	Acetyl-CoA carboxylase beta OS=Danio rerio OX=7955 GN=acacb PE=1 SV=2			0	30.73	IPVTVEK				-0.00173393	784.468	393.241	784.469	393.242	2	8	1.1.1.2842.5	16.5687	852.27	550.6	16.39	0.57	5963.12
2	128.04	128.03	56.96	33.03	31.1	tr|F1QM37|F1QM37_DANRE	Acetyl-CoA carboxylase beta OS=Danio rerio OX=7955 GN=acacb PE=1 SV=2			0	18.81	IPVTVEK				-0.00173393	784.468	393.241	784.469	393.242	2	7	1.1.1.2849.4	16.9693	852.27	304.35	16.39	0.57	3666.67
2	128.04	128.03	56.96	33.03	31.1	tr|F1QM37|F1QM37_DANRE	Acetyl-CoA carboxylase beta OS=Danio rerio OX=7955 GN=acacb PE=1 SV=2			0	17.19	IPVTVEK				0.00283347	784.472	393.243	784.469	393.242	2	6	2.1.1.2859.3	16.4126	201.35	106.15	16.58	0.63	1643.2
2	128.04	128.03	56.96	33.03	31.1	tr|F1QM37|F1QM37_DANRE	Acetyl-CoA carboxylase beta OS=Danio rerio OX=7955 GN=acacb PE=1 SV=2			0	99	ITSENPDEGFKPSSGTVQELNFR				-0.000872176	2551.22	851.413	2551.22	851.414	3	20	1.1.1.3042.22	28.1317	2108.58	564.19	28.43	0.52	2310.49
2	128.04	128.03	56.96	33.03	31.1	tr|F1QM37|F1QM37_DANRE	Acetyl-CoA carboxylase beta OS=Danio rerio OX=7955 GN=acacb PE=1 SV=2			0	99	ITSENPDEGFKPSSGTVQELNFR				-0.000872176	2551.22	851.413	2551.22	851.414	3	27	1.1.1.3044.25	28.2474	2108.58	1251.12	28.43	0.52	4812.08
2	128.04	128.03	56.96	33.03	31.1	tr|F1QM37|F1QM37_DANRE	Acetyl-CoA carboxylase beta OS=Danio rerio OX=7955 GN=acacb PE=1 SV=2			0	99	ITSENPDEGFKPSSGTVQELNFR				-0.000872176	2551.22	851.413	2551.22	851.414	3	32	1.1.1.3046.23	28.3629	2108.58	2017.39	28.43	0.52	7291.18
2	128.04	128.03	56.96	33.03	31.1	tr|F1QM37|F1QM37_DANRE	Acetyl-CoA carboxylase beta OS=Danio rerio OX=7955 GN=acacb PE=1 SV=2			0	99	ITSENPDEGFKPSSGTVQELNFR				-0.000872176	2551.22	851.413	2551.22	851.414	3	29	1.1.1.3048.30	28.4768	2108.58	1975.28	28.43	0.52	6096.69
2	128.04	128.03	56.96	33.03	31.1	tr|F1QM37|F1QM37_DANRE	Acetyl-CoA carboxylase beta OS=Danio rerio OX=7955 GN=acacb PE=1 SV=2			0	99	ITSENPDEGFKPSSGTVQELNFR				-0.000872176	2551.22	851.413	2551.22	851.414	3	29	1.1.1.3050.24	28.5908	2108.58	1527.78	28.43	0.52	5787.39
2	128.04	128.03	56.96	33.03	31.1	tr|F1QM37|F1QM37_DANRE	Acetyl-CoA carboxylase beta OS=Danio rerio OX=7955 GN=acacb PE=1 SV=2			0	99	ITSENPDEGFKPSSGTVQELNFR				-0.000872176	2551.22	851.413	2551.22	851.414	3	29	1.1.1.3052.30	28.7097	2108.58	1196.1	28.43	0.52	4238
2	128.04	128.03	56.96	33.03	31.1	tr|F1QM37|F1QM37_DANRE	Acetyl-CoA carboxylase beta OS=Danio rerio OX=7955 GN=acacb PE=1 SV=2			0	99	ITSENPDEGFKPSSGTVQELNFR				-0.000872176	2551.22	851.413	2551.22	851.414	3	26	1.1.1.3054.28	28.8253	2108.58	946.84	28.43	0.52	3496.05
2	128.04	128.03	56.96	33.03	31.1	tr|F1QM37|F1QM37_DANRE	Acetyl-CoA carboxylase beta OS=Danio rerio OX=7955 GN=acacb PE=1 SV=2			0	99	ITSENPDEGFKPSSGTVQELNFR				-0.000872176	2551.22	851.413	2551.22	851.414	3	22	1.1.1.3056.28	28.941	2108.58	754.42	28.43	0.52	2905.64
2	128.04	128.03	56.96	33.03	31.1	tr|F1QM37|F1QM37_DANRE	Acetyl-CoA carboxylase beta OS=Danio rerio OX=7955 GN=acacb PE=1 SV=2			0	99	ITSENPDEGFKPSSGTVQELNFR				-0.000872176	2551.22	851.413	2551.22	851.414	3	26	1.1.1.3058.24	29.0563	2108.58	721.61	28.43	0.52	2650.82
2	128.04	128.03	56.96	33.03	31.1	tr|F1QM37|F1QM37_DANRE	Acetyl-CoA carboxylase beta OS=Danio rerio OX=7955 GN=acacb PE=1 SV=2			0	99	ITSENPDEGFKPSSGTVQELNFR				-0.000872176	2551.22	851.413	2551.22	851.414	3	24	1.1.1.3062.25	29.2875	2108.58	534.41	28.43	0.52	2283.6
2	128.04	128.03	56.96	33.03	31.1	tr|F1QM37|F1QM37_DANRE	Acetyl-CoA carboxylase beta OS=Danio rerio OX=7955 GN=acacb PE=1 SV=2			0	99	ITSENPDEGFKPSSGTVQELNFR				-0.000872176	2551.22	851.413	2551.22	851.414	3	18	1.1.1.3064.19	29.403	2108.58	479.79	28.43	0.52	2028.26
2	128.04	128.03	56.96	33.03	31.1	tr|F1QM37|F1QM37_DANRE	Acetyl-CoA carboxylase beta OS=Danio rerio OX=7955 GN=acacb PE=1 SV=2			0	99	ITSENPDEGFKPSSGTVQELNFR				-0.000872176	2551.22	851.413	2551.22	851.414	3	20	1.1.1.3067.28	29.5764	2108.58	402.54	28.43	0.52	2108.83
2	128.04	128.03	56.96	33.03	31.1	tr|F1QM37|F1QM37_DANRE	Acetyl-CoA carboxylase beta OS=Danio rerio OX=7955 GN=acacb PE=1 SV=2			0	99	ITSENPDEGFKPSSGTVQELNFR				-0.000872176	2551.22	851.413	2551.22	851.414	3	14	1.1.1.3071.31	29.8077	2108.58	385.63	28.43	0.52	2049.72
2	128.04	128.03	56.96	33.03	31.1	tr|F1QM37|F1QM37_DANRE	Acetyl-CoA carboxylase beta OS=Danio rerio OX=7955 GN=acacb PE=1 SV=2			0	99	ITSENPDEGFKPSSGTVQELNFR				-0.00162879	2551.22	851.413	2551.22	851.414	3	20	2.1.1.3067.31	28.444	971.48	851.6	28.51	0.69	2779.36
2	128.04	128.03	56.96	33.03	31.1	tr|F1QM37|F1QM37_DANRE	Acetyl-CoA carboxylase beta OS=Danio rerio OX=7955 GN=acacb PE=1 SV=2			0	99	ITSENPDEGFKPSSGTVQELNFR				-0.00162879	2551.22	851.413	2551.22	851.414	3	22	2.1.1.3069.31	28.5594	971.48	941.31	28.51	0.69	2963.12
2	128.04	128.03	56.96	33.03	31.1	tr|F1QM37|F1QM37_DANRE	Acetyl-CoA carboxylase beta OS=Danio rerio OX=7955 GN=acacb PE=1 SV=2			0	99	ITSENPDEGFKPSSGTVQELNFR				-0.00162879	2551.22	851.413	2551.22	851.414	3	23	2.1.1.3071.31	28.6748	971.48	795.82	28.51	0.69	2686.48
2	128.04	128.03	56.96	33.03	31.1	tr|F1QM37|F1QM37_DANRE	Acetyl-CoA carboxylase beta OS=Danio rerio OX=7955 GN=acacb PE=1 SV=2			0	99	ITSENPDEGFKPSSGTVQELNFR				-0.00162879	2551.22	851.413	2551.22	851.414	3	17	2.1.1.3073.31	28.7903	971.48	682.44	28.51	0.69	2105.81
2	128.04	128.03	56.96	33.03	31.1	tr|F1QM37|F1QM37_DANRE	Acetyl-CoA carboxylase beta OS=Danio rerio OX=7955 GN=acacb PE=1 SV=2			0	99	ITSENPDEGFKPSSGTVQELNFR				-0.00162879	2551.22	851.413	2551.22	851.414	3	22	2.1.1.3075.24	28.9056	971.48	490.86	28.51	0.69	1727.82
2	128.04	128.03	56.96	33.03	31.1	tr|F1QM37|F1QM37_DANRE	Acetyl-CoA carboxylase beta OS=Danio rerio OX=7955 GN=acacb PE=1 SV=2			0	99	ITSENPDEGFKPSSGTVQELNFR				-0.00162879	2551.22	851.413	2551.22	851.414	3	22	2.1.1.3078.28	29.0756	971.48	372.41	28.51	0.69	1591.34
2	128.04	128.03	56.96	33.03	31.1	tr|F1QM37|F1QM37_DANRE	Acetyl-CoA carboxylase beta OS=Danio rerio OX=7955 GN=acacb PE=1 SV=2			0	99	ITSENPDEGFKPSSGTVQELNFR				-0.00162879	2551.22	851.413	2551.22	851.414	3	11	2.1.1.3077.31	29.0211	971.48	385.31	28.51	0.69	1646.69
2	128.04	128.03	56.96	33.03	31.1	tr|F1QM37|F1QM37_DANRE	Acetyl-CoA carboxylase beta OS=Danio rerio OX=7955 GN=acacb PE=1 SV=2			0	99	IYISANSGAR				-0.00389832	1050.54	526.278	1050.55	526.28	2	12	1.1.1.2855.18	17.336	995.87	923.8	17.25	0.86	4105.79
2	128.04	128.03	56.96	33.03	31.1	tr|F1QM37|F1QM37_DANRE	Acetyl-CoA carboxylase beta OS=Danio rerio OX=7955 GN=acacb PE=1 SV=2			0	99	IYISANSGAR				-0.00389832	1050.54	526.278	1050.55	526.28	2	12	1.1.1.2857.19	17.4531	995.87	759.45	17.25	0.86	3140.09
2	128.04	128.03	56.96	33.03	31.1	tr|F1QM37|F1QM37_DANRE	Acetyl-CoA carboxylase beta OS=Danio rerio OX=7955 GN=acacb PE=1 SV=2			0	99	IYISANSGAR				-0.00389832	1050.54	526.278	1050.55	526.28	2	10	1.1.1.2859.18	17.5668	995.87	611.16	17.25	0.86	2479.52
2	128.04	128.03	56.96	33.03	31.1	tr|F1QM37|F1QM37_DANRE	Acetyl-CoA carboxylase beta OS=Danio rerio OX=7955 GN=acacb PE=1 SV=2			0	99	IYISANSGAR				-0.00389832	1050.54	526.278	1050.55	526.28	2	10	1.1.1.2862.21	17.7447	995.87	445.95	17.25	0.86	2128.19
2	128.04	128.03	56.96	33.03	31.1	tr|F1QM37|F1QM37_DANRE	Acetyl-CoA carboxylase beta OS=Danio rerio OX=7955 GN=acacb PE=1 SV=2			0	99	IYISANSGAR				-0.00389832	1050.54	526.278	1050.55	526.28	2	10	1.1.1.2864.21	17.8597	995.87	423.7	17.25	0.86	2024.71
2	128.04	128.03	56.96	33.03	31.1	tr|F1QM37|F1QM37_DANRE	Acetyl-CoA carboxylase beta OS=Danio rerio OX=7955 GN=acacb PE=1 SV=2			0	99	IYISANSGAR				-0.00389832	1050.54	526.278	1050.55	526.28	2	10	1.1.1.2873.20	18.3767	995.87	319.18	17.25	0.86	1735.47
2	128.04	128.03	56.96	33.03	31.1	tr|F1QM37|F1QM37_DANRE	Acetyl-CoA carboxylase beta OS=Danio rerio OX=7955 GN=acacb PE=1 SV=2			0	99	IYISANSGAR				-0.000809002	1050.55	526.28	1050.55	526.28	2	11	2.1.1.2878.10	17.5236	379.51	372.94	17.44	1.32	2380.88
2	128.04	128.03	56.96	33.03	31.1	tr|F1QM37|F1QM37_DANRE	Acetyl-CoA carboxylase beta OS=Danio rerio OX=7955 GN=acacb PE=1 SV=2			0	99	IYISANSGAR				-0.000809002	1050.55	526.28	1050.55	526.28	2	9	2.1.1.2880.17	17.6419	379.51	298.76	17.44	1.32	2000.91
2	128.04	128.03	56.96	33.03	31.1	tr|F1QM37|F1QM37_DANRE	Acetyl-CoA carboxylase beta OS=Danio rerio OX=7955 GN=acacb PE=1 SV=2			0	99	IYISANSGAR				-0.000809002	1050.55	526.28	1050.55	526.28	2	8	2.1.1.2876.16	17.4102	379.51	328.29	17.44	1.32	1935.83
2	128.04	128.03	56.96	33.03	31.1	tr|F1QM37|F1QM37_DANRE	Acetyl-CoA carboxylase beta OS=Danio rerio OX=7955 GN=acacb PE=1 SV=2			0	99	IYISANSGAR				-0.000809002	1050.55	526.28	1050.55	526.28	2	8	2.1.1.2888.18	18.1045	379.51	193.11	17.44	1.32	1611.7
2	128.04	128.03	56.96	33.03	31.1	tr|F1QM37|F1QM37_DANRE	Acetyl-CoA carboxylase beta OS=Danio rerio OX=7955 GN=acacb PE=1 SV=2			0	99	IYISANSGAR				-0.00389832	1050.54	526.278	1050.55	526.28	2	9	1.1.1.2852.22	17.17	995.87	785.3	17.25	0.86	2218.47
2	128.04	128.03	56.96	33.03	31.1	tr|F1QM37|F1QM37_DANRE	Acetyl-CoA carboxylase beta OS=Danio rerio OX=7955 GN=acacb PE=1 SV=2			0	99	IYISANSGAR	Deamidated(N)@6			0.0148963	1051.54	526.78	1051.53	526.772	2	8	1.1.1.2861.21	17.6871	564.19	337.76	17.25	1.44	1685.89
2	128.04	128.03	56.96	33.03	31.1	tr|F1QM37|F1QM37_DANRE	Acetyl-CoA carboxylase beta OS=Danio rerio OX=7955 GN=acacb PE=1 SV=2			0	99	IYISANSGAR				-0.00389832	1050.54	526.278	1050.55	526.28	2	8	1.1.1.2868.20	18.0886	995.87	330.56	17.25	0.86	1667.49
2	128.04	128.03	56.96	33.03	31.1	tr|F1QM37|F1QM37_DANRE	Acetyl-CoA carboxylase beta OS=Danio rerio OX=7955 GN=acacb PE=1 SV=2			0	99	IYISANSGAR				-0.00389832	1050.54	526.278	1050.55	526.28	2	7	1.1.1.2866.18	17.9701	995.87	395.68	17.25	0.86	1998.31
2	128.04	128.03	56.96	33.03	31.1	tr|F1QM37|F1QM37_DANRE	Acetyl-CoA carboxylase beta OS=Danio rerio OX=7955 GN=acacb PE=1 SV=2			0	98.32	IYISANSGAR				-0.000809002	1050.55	526.28	1050.55	526.28	2	7	2.1.1.2892.20	18.3385	379.51	175.64	17.44	1.32	1592.9
2	128.04	128.03	56.96	33.03	31.1	tr|F1QM37|F1QM37_DANRE	Acetyl-CoA carboxylase beta OS=Danio rerio OX=7955 GN=acacb PE=1 SV=2			0	95.5	IYISANSGAR				-0.000809002	1050.55	526.28	1050.55	526.28	2	6	2.1.1.2873.19	17.2426	379.51	175.19	17.44	1.32	1204.58
2	128.04	128.03	56.96	33.03	31.1	tr|F1QM37|F1QM37_DANRE	Acetyl-CoA carboxylase beta OS=Danio rerio OX=7955 GN=acacb PE=1 SV=2			0	94.98	IYISANSGAR				-0.00389832	1050.54	526.278	1050.55	526.28	2	7	1.1.1.2851.21	17.1113	995.87	546.8	17.25	0.86	1799.97
2	128.04	128.03	56.96	33.03	31.1	tr|F1QM37|F1QM37_DANRE	Acetyl-CoA carboxylase beta OS=Danio rerio OX=7955 GN=acacb PE=1 SV=2			0	21.48	IYISANSGAR				-0.00389832	1050.54	526.278	1050.55	526.28	2	8	1.1.1.2861.21	17.6871	995.87	489.76	17.25	0.86	1685.89
2	128.04	128.03	56.96	33.03	31.1	tr|F1QM37|F1QM37_DANRE	Acetyl-CoA carboxylase beta OS=Danio rerio OX=7955 GN=acacb PE=1 SV=2			0	99	KVESSEDFPSLFR			missed K-V@1	0.00090801	1539.76	514.26	1539.76	514.26	3	10	1.1.1.3054.11	28.792	355.24	244.14	28.95	1.97	1921.23
2	128.04	128.03	56.96	33.03	31.1	tr|F1QM37|F1QM37_DANRE	Acetyl-CoA carboxylase beta OS=Danio rerio OX=7955 GN=acacb PE=1 SV=2			0	99	KVESSEDFPSLFR			missed K-V@1	0.00090801	1539.76	514.26	1539.76	514.26	3	11	1.1.1.3058.6	29.0146	355.24	348.17	28.95	1.97	2308.36
2	128.04	128.03	56.96	33.03	31.1	tr|F1QM37|F1QM37_DANRE	Acetyl-CoA carboxylase beta OS=Danio rerio OX=7955 GN=acacb PE=1 SV=2			0	99	KVESSEDFPSLFR			missed K-V@1	0.00090801	1539.76	514.26	1539.76	514.26	3	10	1.1.1.3064.6	29.3613	355.24	235.31	28.95	1.97	1737.59
2	128.04	128.03	56.96	33.03	31.1	tr|F1QM37|F1QM37_DANRE	Acetyl-CoA carboxylase beta OS=Danio rerio OX=7955 GN=acacb PE=1 SV=2			0	99	KVESSEDFPSLFR			missed K-V@1	0.00090801	1539.76	514.26	1539.76	514.26	3	9	1.1.1.3066.7	29.4786	355.24	221.51	28.95	1.97	1557
2	128.04	128.03	56.96	33.03	31.1	tr|F1QM37|F1QM37_DANRE	Acetyl-CoA carboxylase beta OS=Danio rerio OX=7955 GN=acacb PE=1 SV=2			0	99	KVESSEDFPSLFR			missed K-V@1	0.00090801	1539.76	514.26	1539.76	514.26	3	8	1.1.1.3062.8	29.2491	355.24	261.61	28.95	1.97	1959.73
2	128.04	128.03	56.96	33.03	31.1	tr|F1QM37|F1QM37_DANRE	Acetyl-CoA carboxylase beta OS=Danio rerio OX=7955 GN=acacb PE=1 SV=2			0	99	KVESSEDFPSLFR			missed K-V@1	0.00090801	1539.76	514.26	1539.76	514.26	3	8	1.1.1.3060.10	29.1368	355.24	288.19	28.95	1.97	1847.46
2	128.04	128.03	56.96	33.03	31.1	tr|F1QM37|F1QM37_DANRE	Acetyl-CoA carboxylase beta OS=Danio rerio OX=7955 GN=acacb PE=1 SV=2			0	92.09	KVESSEDFPSLFR			missed K-V@1	0.00090801	1539.76	514.26	1539.76	514.26	3	8	1.1.1.3068.5	29.5976	355.24	190.21	28.95	1.97	1596.34
2	128.04	128.03	56.96	33.03	31.1	tr|F1QM37|F1QM37_DANRE	Acetyl-CoA carboxylase beta OS=Danio rerio OX=7955 GN=acacb PE=1 SV=2			0	69.23	KVESSEDFPSLFR			missed K-V@1	0.00090801	1539.76	514.26	1539.76	514.26	3	6	1.1.1.3070.7	29.7099	355.24	185.31	28.95	1.97	1493.22
2	128.04	128.03	56.96	33.03	31.1	tr|F1QM37|F1QM37_DANRE	Acetyl-CoA carboxylase beta OS=Danio rerio OX=7955 GN=acacb PE=1 SV=2			0	39.61	KVESSEDFPSLFR			missed K-V@1	0.00090801	1539.76	514.26	1539.76	514.26	3	6	1.1.1.3089.9	30.8125	355.24	117.83	28.95	1.97	1077.91
2	128.04	128.03	56.96	33.03	31.1	tr|F1QM37|F1QM37_DANRE	Acetyl-CoA carboxylase beta OS=Danio rerio OX=7955 GN=acacb PE=1 SV=2			0	99	LAEQLGKPDLPSQER				-0.000922879	1679.88	560.968	1679.88	560.969	3	13	1.1.1.2908.22	20.3806	1706.24	586.8	20.58	0.46	3211.18
2	128.04	128.03	56.96	33.03	31.1	tr|F1QM37|F1QM37_DANRE	Acetyl-CoA carboxylase beta OS=Danio rerio OX=7955 GN=acacb PE=1 SV=2			0	99	LAEQLGKPDLPSQER				-0.000922879	1679.88	560.968	1679.88	560.969	3	18	1.1.1.2910.22	20.4954	1706.24	1399.13	20.58	0.46	7236.74
2	128.04	128.03	56.96	33.03	31.1	tr|F1QM37|F1QM37_DANRE	Acetyl-CoA carboxylase beta OS=Danio rerio OX=7955 GN=acacb PE=1 SV=2			0	99	LAEQLGKPDLPSQER				-0.000922879	1679.88	560.968	1679.88	560.969	3	21	1.1.1.2912.23	20.6122	1706.24	1684.73	20.58	0.46	9879.41
2	128.04	128.03	56.96	33.03	31.1	tr|F1QM37|F1QM37_DANRE	Acetyl-CoA carboxylase beta OS=Danio rerio OX=7955 GN=acacb PE=1 SV=2			0	99	LAEQLGKPDLPSQER				-0.000922879	1679.88	560.968	1679.88	560.969	3	21	1.1.1.2914.23	20.7277	1706.24	1450.07	20.58	0.46	8079.08
2	128.04	128.03	56.96	33.03	31.1	tr|F1QM37|F1QM37_DANRE	Acetyl-CoA carboxylase beta OS=Danio rerio OX=7955 GN=acacb PE=1 SV=2			0	99	LAEQLGKPDLPSQER				-0.000922879	1679.88	560.968	1679.88	560.969	3	18	1.1.1.2916.25	20.8465	1706.24	1017.83	20.58	0.46	5551.3
2	128.04	128.03	56.96	33.03	31.1	tr|F1QM37|F1QM37_DANRE	Acetyl-CoA carboxylase beta OS=Danio rerio OX=7955 GN=acacb PE=1 SV=2			0	99	LAEQLGKPDLPSQER				0.00346278	1679.89	560.97	1679.88	560.969	3	20	2.1.1.2932.25	20.646	965.18	781.73	20.72	0.4	5245.4
2	128.04	128.03	56.96	33.03	31.1	tr|F1QM37|F1QM37_DANRE	Acetyl-CoA carboxylase beta OS=Danio rerio OX=7955 GN=acacb PE=1 SV=2			0	99	LAEQLGKPDLPSQER				0.00346278	1679.89	560.97	1679.88	560.969	3	18	2.1.1.2934.23	20.758	965.18	957.8	20.72	0.4	6243.35
2	128.04	128.03	56.96	33.03	31.1	tr|F1QM37|F1QM37_DANRE	Acetyl-CoA carboxylase beta OS=Danio rerio OX=7955 GN=acacb PE=1 SV=2			0	99	LAEQLGKPDLPSQER				0.00346278	1679.89	560.97	1679.88	560.969	3	15	2.1.1.2936.23	20.8735	965.18	734.5	20.72	0.4	4525.51
2	128.04	128.03	56.96	33.03	31.1	tr|F1QM37|F1QM37_DANRE	Acetyl-CoA carboxylase beta OS=Danio rerio OX=7955 GN=acacb PE=1 SV=2			0	99	LAEQLGKPDLPSQER				0.00346278	1679.89	560.97	1679.88	560.969	3	12	2.1.1.2938.28	20.9973	965.18	385.88	20.72	0.4	3456.25
2	128.04	128.03	56.96	33.03	31.1	tr|F1QM37|F1QM37_DANRE	Acetyl-CoA carboxylase beta OS=Danio rerio OX=7955 GN=acacb PE=1 SV=2			0	99	LAEQLGKPDLPSQER				0.00346278	1679.89	560.97	1679.88	560.969	3	13	2.1.1.2940.20	21.0993	965.18	305.42	20.72	0.4	3175.39
2	128.04	128.03	56.96	33.03	31.1	tr|F1QM37|F1QM37_DANRE	Acetyl-CoA carboxylase beta OS=Danio rerio OX=7955 GN=acacb PE=1 SV=2			0	99	LAEQLGKPDLPSQER				0.00346278	1679.89	560.97	1679.88	560.969	3	10	2.1.1.2946.24	21.4521	965.18	165.36	20.72	0.4	2100.8
2	128.04	128.03	56.96	33.03	31.1	tr|F1QM37|F1QM37_DANRE	Acetyl-CoA carboxylase beta OS=Danio rerio OX=7955 GN=acacb PE=1 SV=2			0	91.12	LAEQLGKPDLPSQER				0.00346278	1679.89	560.97	1679.88	560.969	3	11	2.1.1.2933.25	20.7036	965.18	912.88	20.72	0.4	2898.94
2	128.04	128.03	56.96	33.03	31.1	tr|F1QM37|F1QM37_DANRE	Acetyl-CoA carboxylase beta OS=Danio rerio OX=7955 GN=acacb PE=1 SV=2			0	81.17	LAEQLGKPDLPSQER				-0.000922879	1679.88	560.968	1679.88	560.969	3	10	1.1.1.2913.21	20.6667	1706.24	1636.46	20.58	0.46	4031.62
2	128.04	128.03	56.96	33.03	31.1	tr|F1QM37|F1QM37_DANRE	Acetyl-CoA carboxylase beta OS=Danio rerio OX=7955 GN=acacb PE=1 SV=2			0	29.92	LAEQLGKPDLPSQER				-0.000922879	1679.88	560.968	1679.88	560.969	3	10	1.1.1.2911.22	20.5532	1706.24	1639.52	20.58	0.46	4597.79
2	128.04	128.03	56.96	33.03	31.1	tr|F1QM37|F1QM37_DANRE	Acetyl-CoA carboxylase beta OS=Danio rerio OX=7955 GN=acacb PE=1 SV=2			0	19.19	LAEQLGKPDLPSQER				-0.000922879	1679.88	560.968	1679.88	560.969	3	7	1.1.1.2917.19	20.8944	1706.24	904.61	20.58	0.46	2551.42
2	128.04	128.03	56.96	33.03	31.1	tr|F1QM37|F1QM37_DANRE	Acetyl-CoA carboxylase beta OS=Danio rerio OX=7955 GN=acacb PE=1 SV=2			0	99	LGGIPLGVIAVETR				-0.00106666	1393.83	697.921	1393.83	697.922	2	22	1.1.1.3171.10	35.5637	1572.41	1046.94	35.78	0.75	4392.15
2	128.04	128.03	56.96	33.03	31.1	tr|F1QM37|F1QM37_DANRE	Acetyl-CoA carboxylase beta OS=Danio rerio OX=7955 GN=acacb PE=1 SV=2			0	99	LGGIPLGVIAVETR				-0.00106666	1393.83	697.921	1393.83	697.922	2	22	1.1.1.3173.9	35.6777	1572.41	1424.11	35.78	0.75	6229.86
2	128.04	128.03	56.96	33.03	31.1	tr|F1QM37|F1QM37_DANRE	Acetyl-CoA carboxylase beta OS=Danio rerio OX=7955 GN=acacb PE=1 SV=2			0	99	LGGIPLGVIAVETR				-0.00106666	1393.83	697.921	1393.83	697.922	2	23	1.1.1.3175.8	35.7917	1572.41	1553.2	35.78	0.75	7235.95
2	128.04	128.03	56.96	33.03	31.1	tr|F1QM37|F1QM37_DANRE	Acetyl-CoA carboxylase beta OS=Danio rerio OX=7955 GN=acacb PE=1 SV=2			0	99	LGGIPLGVIAVETR				-0.00106666	1393.83	697.921	1393.83	697.922	2	22	1.1.1.3177.7	35.9057	1572.41	1345.79	35.78	0.75	5764.95
2	128.04	128.03	56.96	33.03	31.1	tr|F1QM37|F1QM37_DANRE	Acetyl-CoA carboxylase beta OS=Danio rerio OX=7955 GN=acacb PE=1 SV=2			0	99	LGGIPLGVIAVETR				-0.00106666	1393.83	697.921	1393.83	697.922	2	20	1.1.1.3179.9	36.0243	1572.41	1094.54	35.78	0.75	5179.27
2	128.04	128.03	56.96	33.03	31.1	tr|F1QM37|F1QM37_DANRE	Acetyl-CoA carboxylase beta OS=Danio rerio OX=7955 GN=acacb PE=1 SV=2			0	99	LGGIPLGVIAVETR				-0.00106666	1393.83	697.921	1393.83	697.922	2	22	1.1.1.3181.8	36.1383	1572.41	830.36	35.78	0.75	4044.95
2	128.04	128.03	56.96	33.03	31.1	tr|F1QM37|F1QM37_DANRE	Acetyl-CoA carboxylase beta OS=Danio rerio OX=7955 GN=acacb PE=1 SV=2			0	99	LGGIPLGVIAVETR				-0.00106666	1393.83	697.921	1393.83	697.922	2	18	1.1.1.3183.10	36.2573	1572.41	704.29	35.78	0.75	3261.18
2	128.04	128.03	56.96	33.03	31.1	tr|F1QM37|F1QM37_DANRE	Acetyl-CoA carboxylase beta OS=Danio rerio OX=7955 GN=acacb PE=1 SV=2			0	99	LGGIPLGVIAVETR				-0.00106666	1393.83	697.921	1393.83	697.922	2	19	1.1.1.3185.6	36.3663	1572.41	577.94	35.78	0.75	3063.72
2	128.04	128.03	56.96	33.03	31.1	tr|F1QM37|F1QM37_DANRE	Acetyl-CoA carboxylase beta OS=Danio rerio OX=7955 GN=acacb PE=1 SV=2			0	99	LGGIPLGVIAVETR				-0.00106666	1393.83	697.921	1393.83	697.922	2	18	1.1.1.3187.7	36.484	1572.41	488.83	35.78	0.75	2753.47
2	128.04	128.03	56.96	33.03	31.1	tr|F1QM37|F1QM37_DANRE	Acetyl-CoA carboxylase beta OS=Danio rerio OX=7955 GN=acacb PE=1 SV=2			0	99	LGGIPLGVIAVETR				-0.00106666	1393.83	697.921	1393.83	697.922	2	17	1.1.1.3189.7	36.5998	1572.41	421.38	35.78	0.75	2529.51
2	128.04	128.03	56.96	33.03	31.1	tr|F1QM37|F1QM37_DANRE	Acetyl-CoA carboxylase beta OS=Danio rerio OX=7955 GN=acacb PE=1 SV=2			0	99	LGGIPLGVIAVETR				-0.00106666	1393.83	697.921	1393.83	697.922	2	14	1.1.1.3191.9	36.7188	1572.41	379.95	35.78	0.75	2165.6
2	128.04	128.03	56.96	33.03	31.1	tr|F1QM37|F1QM37_DANRE	Acetyl-CoA carboxylase beta OS=Danio rerio OX=7955 GN=acacb PE=1 SV=2			0	99	LGGIPLGVIAVETR				-0.00106666	1393.83	697.921	1393.83	697.922	2	15	1.1.1.3193.9	36.8346	1572.41	363.5	35.78	0.75	2220.37
2	128.04	128.03	56.96	33.03	31.1	tr|F1QM37|F1QM37_DANRE	Acetyl-CoA carboxylase beta OS=Danio rerio OX=7955 GN=acacb PE=1 SV=2			0	99	LGGIPLGVIAVETR				-0.00106666	1393.83	697.921	1393.83	697.922	2	15	1.1.1.3195.10	36.9519	1572.41	355.2	35.78	0.75	2226.77
2	128.04	128.03	56.96	33.03	31.1	tr|F1QM37|F1QM37_DANRE	Acetyl-CoA carboxylase beta OS=Danio rerio OX=7955 GN=acacb PE=1 SV=2			0	99	LGGIPLGVIAVETR				-0.00106666	1393.83	697.921	1393.83	697.922	2	18	1.1.1.3200.9	37.2467	1572.41	307.8	35.78	0.75	2144.93
2	128.04	128.03	56.96	33.03	31.1	tr|F1QM37|F1QM37_DANRE	Acetyl-CoA carboxylase beta OS=Danio rerio OX=7955 GN=acacb PE=1 SV=2			0	99	LGGIPLGVIAVETR				-0.002336	1393.83	697.921	1393.83	697.922	2	13	2.1.1.3191.8	35.5801	945.1	342.51	35.91	0.75	2194.38
2	128.04	128.03	56.96	33.03	31.1	tr|F1QM37|F1QM37_DANRE	Acetyl-CoA carboxylase beta OS=Danio rerio OX=7955 GN=acacb PE=1 SV=2			0	99	LGGIPLGVIAVETR				-0.002336	1393.83	697.921	1393.83	697.922	2	21	2.1.1.3193.2	35.6891	945.1	567.8	35.91	0.75	3379.25
2	128.04	128.03	56.96	33.03	31.1	tr|F1QM37|F1QM37_DANRE	Acetyl-CoA carboxylase beta OS=Danio rerio OX=7955 GN=acacb PE=1 SV=2			0	99	LGGIPLGVIAVETR				-0.002336	1393.83	697.921	1393.83	697.922	2	22	2.1.1.3195.3	35.8063	945.1	796.56	35.91	0.75	4119.83
2	128.04	128.03	56.96	33.03	31.1	tr|F1QM37|F1QM37_DANRE	Acetyl-CoA carboxylase beta OS=Danio rerio OX=7955 GN=acacb PE=1 SV=2			0	99	LGGIPLGVIAVETR				-0.002336	1393.83	697.921	1393.83	697.922	2	23	2.1.1.3197.4	35.9253	945.1	938.53	35.91	0.75	4750.5
2	128.04	128.03	56.96	33.03	31.1	tr|F1QM37|F1QM37_DANRE	Acetyl-CoA carboxylase beta OS=Danio rerio OX=7955 GN=acacb PE=1 SV=2			0	99	LGGIPLGVIAVETR				-0.002336	1393.83	697.921	1393.83	697.922	2	23	2.1.1.3199.5	36.0443	945.1	792.73	35.91	0.75	3637.72
2	128.04	128.03	56.96	33.03	31.1	tr|F1QM37|F1QM37_DANRE	Acetyl-CoA carboxylase beta OS=Danio rerio OX=7955 GN=acacb PE=1 SV=2			0	99	LGGIPLGVIAVETR				-0.002336	1393.83	697.921	1393.83	697.922	2	22	2.1.1.3201.9	36.1633	945.1	585.51	35.91	0.75	3168.02
2	128.04	128.03	56.96	33.03	31.1	tr|F1QM37|F1QM37_DANRE	Acetyl-CoA carboxylase beta OS=Danio rerio OX=7955 GN=acacb PE=1 SV=2			0	99	LGGIPLGVIAVETR				-0.002336	1393.83	697.921	1393.83	697.922	2	18	2.1.1.3203.6	36.2706	945.1	480.48	35.91	0.75	2825.55
2	128.04	128.03	56.96	33.03	31.1	tr|F1QM37|F1QM37_DANRE	Acetyl-CoA carboxylase beta OS=Danio rerio OX=7955 GN=acacb PE=1 SV=2			0	99	LGGIPLGVIAVETR				-0.002336	1393.83	697.921	1393.83	697.922	2	16	2.1.1.3205.7	36.3979	945.1	415.09	35.91	0.75	2314.26
2	128.04	128.03	56.96	33.03	31.1	tr|F1QM37|F1QM37_DANRE	Acetyl-CoA carboxylase beta OS=Danio rerio OX=7955 GN=acacb PE=1 SV=2			0	99	LGGIPLGVIAVETR				-0.002336	1393.83	697.921	1393.83	697.922	2	18	2.1.1.3207.8	36.5069	945.1	384.34	35.91	0.75	2123.63
2	128.04	128.03	56.96	33.03	31.1	tr|F1QM37|F1QM37_DANRE	Acetyl-CoA carboxylase beta OS=Danio rerio OX=7955 GN=acacb PE=1 SV=2			0	99	LGGIPLGVIAVETR				-0.002336	1393.83	697.921	1393.83	697.922	2	18	2.1.1.3209.5	36.6226	945.1	353.55	35.91	0.75	2076.45
2	128.04	128.03	56.96	33.03	31.1	tr|F1QM37|F1QM37_DANRE	Acetyl-CoA carboxylase beta OS=Danio rerio OX=7955 GN=acacb PE=1 SV=2			0	99	LGGIPLGVIAVETR				-0.002336	1393.83	697.921	1393.83	697.922	2	9	2.1.1.3192.10	35.6413	945.1	462	35.91	0.75	1924.85
2	128.04	128.03	56.96	33.03	31.1	tr|F1QM37|F1QM37_DANRE	Acetyl-CoA carboxylase beta OS=Danio rerio OX=7955 GN=acacb PE=1 SV=2			0	99	LHQVFHNVLENLVK				0.00221421	1688.94	423.242	1688.94	423.241	4	9	1.1.1.3106.3	31.7875	122.4	115.17	31.89	1.33	1548.21
2	128.04	128.03	56.96	33.03	31.1	tr|F1QM37|F1QM37_DANRE	Acetyl-CoA carboxylase beta OS=Danio rerio OX=7955 GN=acacb PE=1 SV=2			0	96.73	LHQVFHNVLENLVK				-0.00274781	1688.93	563.985	1688.94	563.986	3	8	1.1.1.3114.8	32.2599	357.81	281.54	31.78	1.28	1818.7
2	128.04	128.03	56.96	33.03	31.1	tr|F1QM37|F1QM37_DANRE	Acetyl-CoA carboxylase beta OS=Danio rerio OX=7955 GN=acacb PE=1 SV=2			0	66.16	LHQVFHNVLENLVK				-0.00274781	1688.93	563.985	1688.94	563.986	3	7	1.1.1.3110.13	32.0363	357.81	318.43	31.78	1.28	1852.65
2	128.04	128.03	56.96	33.03	31.1	tr|F1QM37|F1QM37_DANRE	Acetyl-CoA carboxylase beta OS=Danio rerio OX=7955 GN=acacb PE=1 SV=2			0	99	LLETESFR				-0.00100466	993.512	497.763	993.513	497.764	2	11	1.1.1.2906.17	20.2574	1444.56	1339.27	20.17	0.8	6672.27
2	128.04	128.03	56.96	33.03	31.1	tr|F1QM37|F1QM37_DANRE	Acetyl-CoA carboxylase beta OS=Danio rerio OX=7955 GN=acacb PE=1 SV=2			0	99	LLETESFR				-0.00100466	993.512	497.763	993.513	497.764	2	12	1.1.1.2908.18	20.3739	1444.56	1112.08	20.17	0.8	5360.34
2	128.04	128.03	56.96	33.03	31.1	tr|F1QM37|F1QM37_DANRE	Acetyl-CoA carboxylase beta OS=Danio rerio OX=7955 GN=acacb PE=1 SV=2			0	99	LLETESFR				-0.00100466	993.512	497.763	993.513	497.764	2	12	1.1.1.2910.16	20.4854	1444.56	866.54	20.17	0.8	4468.22
2	128.04	128.03	56.96	33.03	31.1	tr|F1QM37|F1QM37_DANRE	Acetyl-CoA carboxylase beta OS=Danio rerio OX=7955 GN=acacb PE=1 SV=2			0	99	LLETESFR				-0.00100466	993.512	497.763	993.513	497.764	2	9	1.1.1.2907.14	20.3094	1444.56	1255.62	20.17	0.8	2567
2	128.04	128.03	56.96	33.03	31.1	tr|F1QM37|F1QM37_DANRE	Acetyl-CoA carboxylase beta OS=Danio rerio OX=7955 GN=acacb PE=1 SV=2			0	99	LLETESFR				-0.00100466	993.512	497.763	993.513	497.764	2	10	1.1.1.2902.14	20.0233	1444.56	1111.26	20.17	0.8	4242.16
2	128.04	128.03	56.96	33.03	31.1	tr|F1QM37|F1QM37_DANRE	Acetyl-CoA carboxylase beta OS=Danio rerio OX=7955 GN=acacb PE=1 SV=2			0	99	LLETESFR				-0.00100466	993.512	497.763	993.513	497.764	2	9	1.1.1.2915.12	20.7671	1444.56	657.74	20.17	0.8	2637.39
2	128.04	128.03	56.96	33.03	31.1	tr|F1QM37|F1QM37_DANRE	Acetyl-CoA carboxylase beta OS=Danio rerio OX=7955 GN=acacb PE=1 SV=2			0	39.21	LLETESFR				-0.00298546	993.51	497.762	993.513	497.764	2	6	2.1.1.2943.13	21.2606	278.05	272	21.24	1.33	2091.5
2	128.04	128.03	56.96	33.03	31.1	tr|F1QM37|F1QM37_DANRE	Acetyl-CoA carboxylase beta OS=Danio rerio OX=7955 GN=acacb PE=1 SV=2			0	99	LLLEEVVK				-0.000899987	941.579	471.797	941.58	471.797	2	12	1.1.1.3015.8	26.5337	1114.5	1112.45	26.52	0.87	4705.51
2	128.04	128.03	56.96	33.03	31.1	tr|F1QM37|F1QM37_DANRE	Acetyl-CoA carboxylase beta OS=Danio rerio OX=7955 GN=acacb PE=1 SV=2			0	99	LLLEEVVK				-0.000899987	941.579	471.797	941.58	471.797	2	11	1.1.1.3013.7	26.4163	1114.5	1000.95	26.52	0.87	4564.4
2	128.04	128.03	56.96	33.03	31.1	tr|F1QM37|F1QM37_DANRE	Acetyl-CoA carboxylase beta OS=Danio rerio OX=7955 GN=acacb PE=1 SV=2			0	98.01	LLLEEVVK				-0.000899987	941.579	471.797	941.58	471.797	2	10	1.1.1.3021.5	26.8755	1114.5	708.13	26.52	0.87	4107.59
2	128.04	128.03	56.96	33.03	31.1	tr|F1QM37|F1QM37_DANRE	Acetyl-CoA carboxylase beta OS=Danio rerio OX=7955 GN=acacb PE=1 SV=2			0	97.57	LLLEEVVK				-0.000899987	941.579	471.797	941.58	471.797	2	10	1.1.1.3019.8	26.7648	1114.5	806.43	26.52	0.87	3870.04
2	128.04	128.03	56.96	33.03	31.1	tr|F1QM37|F1QM37_DANRE	Acetyl-CoA carboxylase beta OS=Danio rerio OX=7955 GN=acacb PE=1 SV=2			0	86.31	LLLEEVVK				-0.000899987	941.579	471.797	941.58	471.797	2	8	1.1.1.3009.10	26.1903	1114.5	430.47	26.52	0.87	2561.41
2	128.04	128.03	56.96	33.03	31.1	tr|F1QM37|F1QM37_DANRE	Acetyl-CoA carboxylase beta OS=Danio rerio OX=7955 GN=acacb PE=1 SV=2			0	71.32	LLLEEVVK				-0.000899987	941.579	471.797	941.58	471.797	2	8	1.1.1.3011.10	26.3058	1114.5	733.06	26.52	0.87	3452.42
2	128.04	128.03	56.96	33.03	31.1	tr|F1QM37|F1QM37_DANRE	Acetyl-CoA carboxylase beta OS=Danio rerio OX=7955 GN=acacb PE=1 SV=2			0	36.35	LLLEEVVK				-0.0019879	941.578	471.796	941.58	471.797	2	6	1.1.1.3041.4	28.0291	1114.5	241.6	26.52	0.87	1409.15
2	128.04	128.03	56.96	33.03	31.1	tr|F1QM37|F1QM37_DANRE	Acetyl-CoA carboxylase beta OS=Danio rerio OX=7955 GN=acacb PE=1 SV=2			0	97.21	LPELLHK				-0.00056758	848.511	425.263	848.512	425.263	2	9	1.1.1.2891.5	19.3805	364.93	327.76	19.31	1.02	4637.79
2	128.04	128.03	56.96	33.03	31.1	tr|F1QM37|F1QM37_DANRE	Acetyl-CoA carboxylase beta OS=Danio rerio OX=7955 GN=acacb PE=1 SV=2			0	62.42	LPELLHK				-0.00056758	848.511	425.263	848.512	425.263	2	8	1.1.1.2894.10	19.5591	364.93	319.79	19.31	1.02	4082.31
2	128.04	128.03	56.96	33.03	31.1	tr|F1QM37|F1QM37_DANRE	Acetyl-CoA carboxylase beta OS=Danio rerio OX=7955 GN=acacb PE=1 SV=2			0	25.56	LPELLHK				-0.00056758	848.511	425.263	848.512	425.263	2	6	1.1.1.2899.9	19.8428	364.93	196.82	19.31	1.02	3209.89
2	128.04	128.03	56.96	33.03	31.1	tr|F1QM37|F1QM37_DANRE	Acetyl-CoA carboxylase beta OS=Danio rerio OX=7955 GN=acacb PE=1 SV=2			0	99	LPGDNEVGMVAFR	Oxidation(M)@9			0.00335073	1419.69	710.85	1419.68	710.848	2	17	1.1.1.2989.26	25.0628	836.35	682.92	25.31	0.92	2426.33
2	128.04	128.03	56.96	33.03	31.1	tr|F1QM37|F1QM37_DANRE	Acetyl-CoA carboxylase beta OS=Danio rerio OX=7955 GN=acacb PE=1 SV=2			0	99	LPGDNEVGMVAFR	Oxidation(M)@9			0.00335073	1419.69	710.85	1419.68	710.848	2	16	1.1.1.2993.27	25.2952	836.35	825.21	25.31	0.92	3211.17
2	128.04	128.03	56.96	33.03	31.1	tr|F1QM37|F1QM37_DANRE	Acetyl-CoA carboxylase beta OS=Danio rerio OX=7955 GN=acacb PE=1 SV=2			0	99	LPGDNEVGMVAFR	Oxidation(M)@9			0.00335073	1419.69	710.85	1419.68	710.848	2	17	1.1.1.2995.28	25.4124	836.35	685.73	25.31	0.92	2842.69
2	128.04	128.03	56.96	33.03	31.1	tr|F1QM37|F1QM37_DANRE	Acetyl-CoA carboxylase beta OS=Danio rerio OX=7955 GN=acacb PE=1 SV=2			0	99	LPGDNEVGMVAFR	Oxidation(M)@9			0.00335073	1419.69	710.85	1419.68	710.848	2	19	1.1.1.2997.23	25.5261	836.35	532.53	25.31	0.92	2203.01
2	128.04	128.03	56.96	33.03	31.1	tr|F1QM37|F1QM37_DANRE	Acetyl-CoA carboxylase beta OS=Danio rerio OX=7955 GN=acacb PE=1 SV=2			0	99	LPGDNEVGMVAFR	Oxidation(M)@9			0.00335073	1419.69	710.85	1419.68	710.848	2	14	1.1.1.2999.28	25.643	836.35	450.58	25.31	0.92	1943.83
2	128.04	128.03	56.96	33.03	31.1	tr|F1QM37|F1QM37_DANRE	Acetyl-CoA carboxylase beta OS=Danio rerio OX=7955 GN=acacb PE=1 SV=2			0	99	LPGDNEVGMVAFR	Oxidation(M)@9			0.00335073	1419.69	710.85	1419.68	710.848	2	11	1.1.1.3001.28	25.7584	836.35	456.46	25.31	0.92	2044.91
2	128.04	128.03	56.96	33.03	31.1	tr|F1QM37|F1QM37_DANRE	Acetyl-CoA carboxylase beta OS=Danio rerio OX=7955 GN=acacb PE=1 SV=2			0	99	LPGDNEVGMVAFR				0.000590122	1403.69	702.851	1403.69	702.851	2	23	1.1.1.3051.22	28.6453	1125.97	899.23	28.77	0.92	3914.67
2	128.04	128.03	56.96	33.03	31.1	tr|F1QM37|F1QM37_DANRE	Acetyl-CoA carboxylase beta OS=Danio rerio OX=7955 GN=acacb PE=1 SV=2			0	99	LPGDNEVGMVAFR				0.000590122	1403.69	702.851	1403.69	702.851	2	23	1.1.1.3053.21	28.7608	1125.97	1100.76	28.77	0.92	4594.33
2	128.04	128.03	56.96	33.03	31.1	tr|F1QM37|F1QM37_DANRE	Acetyl-CoA carboxylase beta OS=Danio rerio OX=7955 GN=acacb PE=1 SV=2			0	99	LPGDNEVGMVAFR				0.000590122	1403.69	702.851	1403.69	702.851	2	22	1.1.1.3055.23	28.8798	1125.97	1042.56	28.77	0.92	4091.84
2	128.04	128.03	56.96	33.03	31.1	tr|F1QM37|F1QM37_DANRE	Acetyl-CoA carboxylase beta OS=Danio rerio OX=7955 GN=acacb PE=1 SV=2			0	99	LPGDNEVGMVAFR				0.000590122	1403.69	702.851	1403.69	702.851	2	21	1.1.1.3057.20	28.9886	1125.97	794.63	28.77	0.92	3922.76
2	128.04	128.03	56.96	33.03	31.1	tr|F1QM37|F1QM37_DANRE	Acetyl-CoA carboxylase beta OS=Danio rerio OX=7955 GN=acacb PE=1 SV=2			0	99	LPGDNEVGMVAFR				0.000590122	1403.69	702.851	1403.69	702.851	2	18	1.1.1.3060.22	29.1568	1125.97	635.8	28.77	0.92	2778.87
2	128.04	128.03	56.96	33.03	31.1	tr|F1QM37|F1QM37_DANRE	Acetyl-CoA carboxylase beta OS=Danio rerio OX=7955 GN=acacb PE=1 SV=2			0	99	LPGDNEVGMVAFR				0.000590122	1403.69	702.851	1403.69	702.851	2	20	1.1.1.3062.22	29.2775	1125.97	551.54	28.77	0.92	2514.95
2	128.04	128.03	56.96	33.03	31.1	tr|F1QM37|F1QM37_DANRE	Acetyl-CoA carboxylase beta OS=Danio rerio OX=7955 GN=acacb PE=1 SV=2			0	99	LPGDNEVGMVAFR				0.000590122	1403.69	702.851	1403.69	702.851	2	20	1.1.1.3064.14	29.3863	1125.97	535.43	28.77	0.92	2425.57
2	128.04	128.03	56.96	33.03	31.1	tr|F1QM37|F1QM37_DANRE	Acetyl-CoA carboxylase beta OS=Danio rerio OX=7955 GN=acacb PE=1 SV=2			0	99	LPGDNEVGMVAFR				-0.00270579	1403.68	702.849	1403.69	702.851	2	18	1.1.1.3075.22	30.0257	381.56	336.92	30.1	0.69	2155.03
2	128.04	128.03	56.96	33.03	31.1	tr|F1QM37|F1QM37_DANRE	Acetyl-CoA carboxylase beta OS=Danio rerio OX=7955 GN=acacb PE=1 SV=2			0	99	LPGDNEVGMVAFR				-0.00270579	1403.68	702.849	1403.69	702.851	2	16	1.1.1.3077.17	30.1381	381.56	373.88	30.1	0.69	2221.71
2	128.04	128.03	56.96	33.03	31.1	tr|F1QM37|F1QM37_DANRE	Acetyl-CoA carboxylase beta OS=Danio rerio OX=7955 GN=acacb PE=1 SV=2			0	99	LPGDNEVGMVAFR	Oxidation(M)@9			0.00346596	1419.69	710.85	1419.68	710.848	2	11	2.1.1.3015.29	25.4398	440.3	404.85	25.39	1.33	1394.44
2	128.04	128.03	56.96	33.03	31.1	tr|F1QM37|F1QM37_DANRE	Acetyl-CoA carboxylase beta OS=Danio rerio OX=7955 GN=acacb PE=1 SV=2			0	99	LPGDNEVGMVAFR	Oxidation(M)@9			0.00335073	1419.69	710.85	1419.68	710.848	2	11	1.1.1.3003.27	25.8724	836.35	391.3	25.31	0.92	1649.99
2	128.04	128.03	56.96	33.03	31.1	tr|F1QM37|F1QM37_DANRE	Acetyl-CoA carboxylase beta OS=Danio rerio OX=7955 GN=acacb PE=1 SV=2			0	94.02	LPGDNEVGMVAFR	Deamidated(N)@5			0.01489	1404.69	703.35	1404.67	703.343	2	8	2.1.1.3078.26	29.0706	388.28	325.07	28.91	0.98	1838.86
2	128.04	128.03	56.96	33.03	31.1	tr|F1QM37|F1QM37_DANRE	Acetyl-CoA carboxylase beta OS=Danio rerio OX=7955 GN=acacb PE=1 SV=2			0	53.37	LPGDNEVGMVAFR				0.000590122	1403.69	702.851	1403.69	702.851	2	9	1.1.1.3069.18	29.6754	1125.97	425.55	28.77	0.92	2956.91
2	128.04	128.03	56.96	33.03	31.1	tr|F1QM37|F1QM37_DANRE	Acetyl-CoA carboxylase beta OS=Danio rerio OX=7955 GN=acacb PE=1 SV=2			0	50.75	LPGDNEVGMVAFR				0.000590122	1403.69	702.851	1403.69	702.851	2	8	1.1.1.3071.25	29.7978	1125.97	400.76	28.77	0.92	2444.04
2	128.04	128.03	56.96	33.03	31.1	tr|F1QM37|F1QM37_DANRE	Acetyl-CoA carboxylase beta OS=Danio rerio OX=7955 GN=acacb PE=1 SV=2			0	39.75	LPGDNEVGMVAFR	Oxidation(M)@9			0.00640249	1419.69	710.851	1419.68	710.848	2	7	1.1.1.3016.25	26.6197	308.01	280.14	26.52	0.4	1857.16
2	128.04	128.03	56.96	33.03	31.1	tr|F1QM37|F1QM37_DANRE	Acetyl-CoA carboxylase beta OS=Danio rerio OX=7955 GN=acacb PE=1 SV=2			0	29.04	LPGDNEVGMVAFR				-0.00270579	1403.68	702.849	1403.69	702.851	2	7	1.1.1.3082.17	30.4272	381.56	309.28	30.1	0.69	1426.17
2	128.04	128.03	56.96	33.03	31.1	tr|F1QM37|F1QM37_DANRE	Acetyl-CoA carboxylase beta OS=Danio rerio OX=7955 GN=acacb PE=1 SV=2			0	99	LTLPVNDSGEFPAMR				0.00154431	1645.81	823.915	1645.81	823.914	2	12	1.1.1.3120.27	32.6394	658.26	651.59	32.65	1.16	3560.9
2	128.04	128.03	56.96	33.03	31.1	tr|F1QM37|F1QM37_DANRE	Acetyl-CoA carboxylase beta OS=Danio rerio OX=7955 GN=acacb PE=1 SV=2			0	99	LTLPVNDSGEFPAMR				-0.00993035	1645.8	823.909	1645.81	823.914	2	11	1.1.1.3141.22	33.8477	243.32	228.79	34.1	1.33	2096.31
2	128.04	128.03	56.96	33.03	31.1	tr|F1QM37|F1QM37_DANRE	Acetyl-CoA carboxylase beta OS=Danio rerio OX=7955 GN=acacb PE=1 SV=2			0	97.43	LTLPVNDSGEFPAMR				0.00154431	1645.81	823.915	1645.81	823.914	2	11	1.1.1.3123.22	32.8099	658.26	534.68	32.65	1.16	3207.02
2	128.04	128.03	56.96	33.03	31.1	tr|F1QM37|F1QM37_DANRE	Acetyl-CoA carboxylase beta OS=Danio rerio OX=7955 GN=acacb PE=1 SV=2			0	99	LTTTGDVIPIR				0.00130181	1184.68	593.346	1184.68	593.346	2	16	1.1.1.2961.18	23.4322	2053	1457.44	23.63	0.98	4239.08
2	128.04	128.03	56.96	33.03	31.1	tr|F1QM37|F1QM37_DANRE	Acetyl-CoA carboxylase beta OS=Danio rerio OX=7955 GN=acacb PE=1 SV=2			0	99	LTTTGDVIPIR				0.00130181	1184.68	593.346	1184.68	593.346	2	17	1.1.1.2963.22	23.5543	2053	1991.21	23.63	0.98	5743.76
2	128.04	128.03	56.96	33.03	31.1	tr|F1QM37|F1QM37_DANRE	Acetyl-CoA carboxylase beta OS=Danio rerio OX=7955 GN=acacb PE=1 SV=2			0	99	LTTTGDVIPIR				0.00130181	1184.68	593.346	1184.68	593.346	2	15	1.1.1.2965.27	23.678	2053	1974.81	23.63	0.98	5743.07
2	128.04	128.03	56.96	33.03	31.1	tr|F1QM37|F1QM37_DANRE	Acetyl-CoA carboxylase beta OS=Danio rerio OX=7955 GN=acacb PE=1 SV=2			0	99	LTTTGDVIPIR				0.00130181	1184.68	593.346	1184.68	593.346	2	16	1.1.1.2969.25	23.9057	2053	1227.57	23.63	0.98	4202.77
2	128.04	128.03	56.96	33.03	31.1	tr|F1QM37|F1QM37_DANRE	Acetyl-CoA carboxylase beta OS=Danio rerio OX=7955 GN=acacb PE=1 SV=2			0	99	LTTTGDVIPIR				0.00130181	1184.68	593.346	1184.68	593.346	2	15	1.1.1.2971.25	24.0215	2053	993.31	23.63	0.98	3518.82
2	128.04	128.03	56.96	33.03	31.1	tr|F1QM37|F1QM37_DANRE	Acetyl-CoA carboxylase beta OS=Danio rerio OX=7955 GN=acacb PE=1 SV=2			0	99	LTTTGDVIPIR				0.00130181	1184.68	593.346	1184.68	593.346	2	11	1.1.1.2977.24	24.3663	2053	641.66	23.63	0.98	2885.74
2	128.04	128.03	56.96	33.03	31.1	tr|F1QM37|F1QM37_DANRE	Acetyl-CoA carboxylase beta OS=Danio rerio OX=7955 GN=acacb PE=1 SV=2			0	99	LTTTGDVIPIR				0.00130181	1184.68	593.346	1184.68	593.346	2	10	1.1.1.2959.23	23.3252	2053	829.22	23.63	0.98	2054.71
2	128.04	128.03	56.96	33.03	31.1	tr|F1QM37|F1QM37_DANRE	Acetyl-CoA carboxylase beta OS=Danio rerio OX=7955 GN=acacb PE=1 SV=2			0	99	LWGPGDSYPK				0.00473667	1118.54	560.279	1118.54	560.277	2	10	1.1.1.2956.20	23.1472	795.05	762.43	23.17	1.56	2546.61
2	128.04	128.03	56.96	33.03	31.1	tr|F1QM37|F1QM37_DANRE	Acetyl-CoA carboxylase beta OS=Danio rerio OX=7955 GN=acacb PE=1 SV=2			0	99	LWGPGDSYPK				0.00473667	1118.54	560.279	1118.54	560.277	2	9	1.1.1.2962.23	23.4983	795.05	517.71	23.17	1.56	2032.91
2	128.04	128.03	56.96	33.03	31.1	tr|F1QM37|F1QM37_DANRE	Acetyl-CoA carboxylase beta OS=Danio rerio OX=7955 GN=acacb PE=1 SV=2			0	99	LWGPGDSYPK				0.00473667	1118.54	560.279	1118.54	560.277	2	8	1.1.1.2954.21	23.0334	795.05	611.38	23.17	1.56	2307.66
2	128.04	128.03	56.96	33.03	31.1	tr|F1QM37|F1QM37_DANRE	Acetyl-CoA carboxylase beta OS=Danio rerio OX=7955 GN=acacb PE=1 SV=2			0	99	LWGPGDSYPK				0.00473667	1118.54	560.279	1118.54	560.277	2	8	1.1.1.2969.19	23.8957	795.05	368.71	23.17	1.56	1840.65
2	128.04	128.03	56.96	33.03	31.1	tr|F1QM37|F1QM37_DANRE	Acetyl-CoA carboxylase beta OS=Danio rerio OX=7955 GN=acacb PE=1 SV=2			0	99	LWGPGDSYPK				0.00287706	1118.54	560.279	1118.54	560.277	2	9	2.1.1.2978.22	23.2943	441.99	440.55	23.31	1.27	2194.58
2	128.04	128.03	56.96	33.03	31.1	tr|F1QM37|F1QM37_DANRE	Acetyl-CoA carboxylase beta OS=Danio rerio OX=7955 GN=acacb PE=1 SV=2			0	99	LWGPGDSYPK				0.00473667	1118.54	560.279	1118.54	560.277	2	8	1.1.1.2960.19	23.3762	795.05	680.93	23.17	1.56	2193.88
2	128.04	128.03	56.96	33.03	31.1	tr|F1QM37|F1QM37_DANRE	Acetyl-CoA carboxylase beta OS=Danio rerio OX=7955 GN=acacb PE=1 SV=2			0	98.58	LWGPGDSYPK				0.00287706	1118.54	560.279	1118.54	560.277	2	7	2.1.1.2976.22	23.179	441.99	399.61	23.31	1.27	1975.52
2	128.04	128.03	56.96	33.03	31.1	tr|F1QM37|F1QM37_DANRE	Acetyl-CoA carboxylase beta OS=Danio rerio OX=7955 GN=acacb PE=1 SV=2			0	96.38	LWGPGDSYPK				0.00473667	1118.54	560.279	1118.54	560.277	2	7	1.1.1.2964.23	23.6137	795.05	435.5	23.17	1.56	1938.32
2	128.04	128.03	56.96	33.03	31.1	tr|F1QM37|F1QM37_DANRE	Acetyl-CoA carboxylase beta OS=Danio rerio OX=7955 GN=acacb PE=1 SV=2			0	95.11	LWGPGDSYPK				0.00473667	1118.54	560.279	1118.54	560.277	2	7	1.1.1.2967.17	23.7767	795.05	395	23.17	1.56	1913.64
2	128.04	128.03	56.96	33.03	31.1	tr|F1QM37|F1QM37_DANRE	Acetyl-CoA carboxylase beta OS=Danio rerio OX=7955 GN=acacb PE=1 SV=2			0	84.04	LWGPGDSYPK				0.00473667	1118.54	560.279	1118.54	560.277	2	6	1.1.1.2952.25	22.9247	795.05	453.18	23.17	1.56	1801.06
2	128.04	128.03	56.96	33.03	31.1	tr|F1QM37|F1QM37_DANRE	Acetyl-CoA carboxylase beta OS=Danio rerio OX=7955 GN=acacb PE=1 SV=2			0	45.84	LWGPGDSYPK				0.00287706	1118.54	560.279	1118.54	560.277	2	5	2.1.1.2982.26	23.5311	441.99	338.32	23.31	1.27	1897.85
2	128.04	128.03	56.96	33.03	31.1	tr|F1QM37|F1QM37_DANRE	Acetyl-CoA carboxylase beta OS=Danio rerio OX=7955 GN=acacb PE=1 SV=2			0	29.16	LWGPGDSYPK				0.00705601	1118.55	560.281	1118.54	560.277	2	6	1.1.1.2974.21	24.188	349.09	338.72	24.15	0.64	1618.1
2	128.04	128.03	56.96	33.03	31.1	tr|F1QM37|F1QM37_DANRE	Acetyl-CoA carboxylase beta OS=Danio rerio OX=7955 GN=acacb PE=1 SV=2			0	25.78	LWGPGDSYPK				0.00705601	1118.55	560.281	1118.54	560.277	2	5	1.1.1.2978.18	24.414	349.09	293.36	24.15	0.64	1474.84
2	128.04	128.03	56.96	33.03	31.1	tr|F1QM37|F1QM37_DANRE	Acetyl-CoA carboxylase beta OS=Danio rerio OX=7955 GN=acacb PE=1 SV=2			0	99	MQLYLGAAR				-0.00650886	1021.53	511.773	1021.54	511.776	2	12	1.1.1.2969.15	23.889	660.75	481.96	24.09	0.92	2499.03
2	128.04	128.03	56.96	33.03	31.1	tr|F1QM37|F1QM37_DANRE	Acetyl-CoA carboxylase beta OS=Danio rerio OX=7955 GN=acacb PE=1 SV=2			0	99	MQLYLGAAR				-0.00650886	1021.53	511.773	1021.54	511.776	2	12	1.1.1.2973.15	24.1203	660.75	623.41	24.09	0.92	3055.2
2	128.04	128.03	56.96	33.03	31.1	tr|F1QM37|F1QM37_DANRE	Acetyl-CoA carboxylase beta OS=Danio rerio OX=7955 GN=acacb PE=1 SV=2			0	99	MQLYLGAAR				-0.00650886	1021.53	511.773	1021.54	511.776	2	10	1.1.1.2975.14	24.2341	660.75	574.73	24.09	0.92	2940.33
2	128.04	128.03	56.96	33.03	31.1	tr|F1QM37|F1QM37_DANRE	Acetyl-CoA carboxylase beta OS=Danio rerio OX=7955 GN=acacb PE=1 SV=2			0	99	MQLYLGAAR				-0.00650886	1021.53	511.773	1021.54	511.776	2	9	1.1.1.2971.16	24.0065	660.75	605.9	24.09	0.92	3073
2	128.04	128.03	56.96	33.03	31.1	tr|F1QM37|F1QM37_DANRE	Acetyl-CoA carboxylase beta OS=Danio rerio OX=7955 GN=acacb PE=1 SV=2			0	85.56	MQLYLGAAR				-0.00475901	1021.53	511.774	1021.54	511.776	2	8	2.1.1.2997.17	24.3817	335.1	309.45	24.3	1.38	2495.12
2	128.04	128.03	56.96	33.03	31.1	tr|F1QM37|F1QM37_DANRE	Acetyl-CoA carboxylase beta OS=Danio rerio OX=7955 GN=acacb PE=1 SV=2			0	19.06	MQLYLGAAR	Oxidation(M)@1			-0.0103327	1037.52	519.769	1037.53	519.774	2	8	1.1.1.2913.12	20.6517	644.42	552.29	20.75	1.15	3657.22
2	128.04	128.03	56.96	33.03	31.1	tr|F1QM37|F1QM37_DANRE	Acetyl-CoA carboxylase beta OS=Danio rerio OX=7955 GN=acacb PE=1 SV=2			0	16.81	MQLYLGAAR	Oxidation(M)@1			-0.00777787	1037.53	519.77	1037.53	519.774	2	7	1.1.1.2923.13	21.2309	644.42	344.79	20.75	1.15	2566.15
2	128.04	128.03	56.96	33.03	31.1	tr|F1QM37|F1QM37_DANRE	Acetyl-CoA carboxylase beta OS=Danio rerio OX=7955 GN=acacb PE=1 SV=2			0	95.7	QADTEDDDALVTAFTAFAHSK				0.0053189	2252.03	751.683	2252.02	751.682	3	10	1.1.1.3353.4	46.0863	299.69	132.61	43.98	2.02	1762.87
2	128.04	128.03	56.96	33.03	31.1	tr|F1QM37|F1QM37_DANRE	Acetyl-CoA carboxylase beta OS=Danio rerio OX=7955 GN=acacb PE=1 SV=2			0	84.28	QADTEDDDALVTAFTAFAHSK				0.0053189	2252.03	751.683	2252.02	751.682	3	10	1.1.1.3355.4	46.2133	299.69	108.46	43.98	2.02	1400.13
2	128.04	128.03	56.96	33.03	31.1	tr|F1QM37|F1QM37_DANRE	Acetyl-CoA carboxylase beta OS=Danio rerio OX=7955 GN=acacb PE=1 SV=2			0	22.92	QADTEDDDALVTAFTAFAHSK				0.0053189	2252.03	751.683	2252.02	751.682	3	7	1.1.1.3311.4	43.6493	299.69	212	43.98	2.02	1157.7
2	128.04	128.03	56.96	33.03	31.1	tr|F1QM37|F1QM37_DANRE	Acetyl-CoA carboxylase beta OS=Danio rerio OX=7955 GN=acacb PE=1 SV=2			0	99	QVLIASHLPSYELR				-0.00085307	1624.89	542.638	1624.89	542.638	3	12	1.1.1.3056.10	28.906	1624.65	688.21	29.18	0.58	2975.83
2	128.04	128.03	56.96	33.03	31.1	tr|F1QM37|F1QM37_DANRE	Acetyl-CoA carboxylase beta OS=Danio rerio OX=7955 GN=acacb PE=1 SV=2			0	99	QVLIASHLPSYELR				-0.00085307	1624.89	542.638	1624.89	542.638	3	17	1.1.1.3060.13	29.1418	1624.65	1570.62	29.18	0.58	5229.26
2	128.04	128.03	56.96	33.03	31.1	tr|F1QM37|F1QM37_DANRE	Acetyl-CoA carboxylase beta OS=Danio rerio OX=7955 GN=acacb PE=1 SV=2			0	99	QVLIASHLPSYELR				-0.00085307	1624.89	542.638	1624.89	542.638	3	16	1.1.1.3062.11	29.2541	1624.65	1425.03	29.18	0.58	4707.1
2	128.04	128.03	56.96	33.03	31.1	tr|F1QM37|F1QM37_DANRE	Acetyl-CoA carboxylase beta OS=Danio rerio OX=7955 GN=acacb PE=1 SV=2			0	99	QVLIASHLPSYELR				-0.00085307	1624.89	542.638	1624.89	542.638	3	15	1.1.1.3064.7	29.363	1624.65	1077.67	29.18	0.58	3958.02
2	128.04	128.03	56.96	33.03	31.1	tr|F1QM37|F1QM37_DANRE	Acetyl-CoA carboxylase beta OS=Danio rerio OX=7955 GN=acacb PE=1 SV=2			0	99	QVLIASHLPSYELR				-0.00085307	1624.89	542.638	1624.89	542.638	3	16	1.1.1.3066.9	29.482	1624.65	761.62	29.18	0.58	3079.4
2	128.04	128.03	56.96	33.03	31.1	tr|F1QM37|F1QM37_DANRE	Acetyl-CoA carboxylase beta OS=Danio rerio OX=7955 GN=acacb PE=1 SV=2			0	99	QVLIASHLPSYELR	Gln->pyro-Glu@N-term			-0.00174335	1607.87	804.94	1607.87	804.941	2	19	1.1.1.3165.26	35.2484	917.53	673.63	35.43	0.98	5230.67
2	128.04	128.03	56.96	33.03	31.1	tr|F1QM37|F1QM37_DANRE	Acetyl-CoA carboxylase beta OS=Danio rerio OX=7955 GN=acacb PE=1 SV=2			0	99	QVLIASHLPSYELR	Gln->pyro-Glu@N-term			-0.00174335	1607.87	804.94	1607.87	804.941	2	19	1.1.1.3167.19	35.3607	917.53	889.35	35.43	0.98	5820.58
2	128.04	128.03	56.96	33.03	31.1	tr|F1QM37|F1QM37_DANRE	Acetyl-CoA carboxylase beta OS=Danio rerio OX=7955 GN=acacb PE=1 SV=2			0	99	QVLIASHLPSYELR	Gln->pyro-Glu@N-term			-0.00174335	1607.87	804.94	1607.87	804.941	2	19	1.1.1.3170.11	35.5409	917.53	825.5	35.43	0.98	6089.1
2	128.04	128.03	56.96	33.03	31.1	tr|F1QM37|F1QM37_DANRE	Acetyl-CoA carboxylase beta OS=Danio rerio OX=7955 GN=acacb PE=1 SV=2			0	99	QVLIASHLPSYELR	Gln->pyro-Glu@N-term			-0.00174335	1607.87	804.94	1607.87	804.941	2	18	1.1.1.3172.14	35.6499	917.53	651.2	35.43	0.98	5548.21
2	128.04	128.03	56.96	33.03	31.1	tr|F1QM37|F1QM37_DANRE	Acetyl-CoA carboxylase beta OS=Danio rerio OX=7955 GN=acacb PE=1 SV=2			0	99	QVLIASHLPSYELR	Gln->pyro-Glu@N-term			-0.00174335	1607.87	804.94	1607.87	804.941	2	18	1.1.1.3174.12	35.7722	917.53	463.52	35.43	0.98	5197.34
2	128.04	128.03	56.96	33.03	31.1	tr|F1QM37|F1QM37_DANRE	Acetyl-CoA carboxylase beta OS=Danio rerio OX=7955 GN=acacb PE=1 SV=2			0	99	QVLIASHLPSYELR	Gln->pyro-Glu@N-term			-0.00174335	1607.87	804.94	1607.87	804.941	2	14	1.1.1.3176.16	35.8879	917.53	397.75	35.43	0.98	2843.29
2	128.04	128.03	56.96	33.03	31.1	tr|F1QM37|F1QM37_DANRE	Acetyl-CoA carboxylase beta OS=Danio rerio OX=7955 GN=acacb PE=1 SV=2			0	99	QVLIASHLPSYELR	Gln->pyro-Glu@N-term			-0.00174335	1607.87	804.94	1607.87	804.941	2	15	1.1.1.3178.17	36.0033	917.53	382.74	35.43	0.98	4106.03
2	128.04	128.03	56.96	33.03	31.1	tr|F1QM37|F1QM37_DANRE	Acetyl-CoA carboxylase beta OS=Danio rerio OX=7955 GN=acacb PE=1 SV=2			0	99	QVLIASHLPSYELR	Gln->pyro-Glu@N-term			-0.00174335	1607.87	804.94	1607.87	804.941	2	12	1.1.1.3183.25	36.2823	917.53	288.73	35.43	0.98	3405.25
2	128.04	128.03	56.96	33.03	31.1	tr|F1QM37|F1QM37_DANRE	Acetyl-CoA carboxylase beta OS=Danio rerio OX=7955 GN=acacb PE=1 SV=2			0	99	QVLIASHLPSYELR				-0.00492913	1624.89	542.637	1624.89	542.638	3	13	2.1.1.3084.17	29.4021	627.62	598.3	29.31	0.87	2289.36
2	128.04	128.03	56.96	33.03	31.1	tr|F1QM37|F1QM37_DANRE	Acetyl-CoA carboxylase beta OS=Danio rerio OX=7955 GN=acacb PE=1 SV=2			0	99	QVLIASHLPSYELR	Gln->pyro-Glu@N-term			-0.0124925	1607.85	804.935	1607.87	804.941	2	14	2.1.1.3189.16	35.4995	555.25	501.27	35.57	1.21	2777.1
2	128.04	128.03	56.96	33.03	31.1	tr|F1QM37|F1QM37_DANRE	Acetyl-CoA carboxylase beta OS=Danio rerio OX=7955 GN=acacb PE=1 SV=2			0	99	QVLIASHLPSYELR	Gln->pyro-Glu@N-term			-0.0124925	1607.85	804.935	1607.87	804.941	2	14	2.1.1.3192.21	35.673	555.25	499.41	35.57	1.21	3331.36
2	128.04	128.03	56.96	33.03	31.1	tr|F1QM37|F1QM37_DANRE	Acetyl-CoA carboxylase beta OS=Danio rerio OX=7955 GN=acacb PE=1 SV=2			0	99	QVLIASHLPSYELR				-0.00085307	1624.89	542.638	1624.89	542.638	3	11	1.1.1.3058.8	29.018	1624.65	1176.35	29.18	0.58	2849.86
2	128.04	128.03	56.96	33.03	31.1	tr|F1QM37|F1QM37_DANRE	Acetyl-CoA carboxylase beta OS=Danio rerio OX=7955 GN=acacb PE=1 SV=2			0	99	QVLIASHLPSYELR				-0.00492913	1624.89	542.637	1624.89	542.638	3	9	2.1.1.3086.13	29.5107	627.62	508.19	29.31	0.87	2509.61
2	128.04	128.03	56.96	33.03	31.1	tr|F1QM37|F1QM37_DANRE	Acetyl-CoA carboxylase beta OS=Danio rerio OX=7955 GN=acacb PE=1 SV=2			0	98.88	QVLIASHLPSYELR	Gln->pyro-Glu@N-term			-0.00174335	1607.87	804.94	1607.87	804.941	2	13	1.1.1.3162.19	35.0716	917.53	331.09	35.43	0.98	4362.35
2	128.04	128.03	56.96	33.03	31.1	tr|F1QM37|F1QM37_DANRE	Acetyl-CoA carboxylase beta OS=Danio rerio OX=7955 GN=acacb PE=1 SV=2			0	97.11	QVLIASHLPSYELR				-0.00085307	1624.89	542.638	1624.89	542.638	3	11	1.1.1.3074.6	29.9413	1624.65	428.98	29.18	0.58	1764.9
2	128.04	128.03	56.96	33.03	31.1	tr|F1QM37|F1QM37_DANRE	Acetyl-CoA carboxylase beta OS=Danio rerio OX=7955 GN=acacb PE=1 SV=2			0	95.41	QVLIASHLPSYELR				-0.00085307	1624.89	542.638	1624.89	542.638	3	8	1.1.1.3071.14	29.7794	1624.65	536.96	29.18	0.58	2308.46
2	128.04	128.03	56.96	33.03	31.1	tr|F1QM37|F1QM37_DANRE	Acetyl-CoA carboxylase beta OS=Danio rerio OX=7955 GN=acacb PE=1 SV=2			0	87.51	QVLIASHLPSYELR				-0.00085307	1624.89	542.638	1624.89	542.638	3	9	1.1.1.3072.7	29.8356	1624.65	511.18	29.18	0.58	2059.34
2	128.04	128.03	56.96	33.03	31.1	tr|F1QM37|F1QM37_DANRE	Acetyl-CoA carboxylase beta OS=Danio rerio OX=7955 GN=acacb PE=1 SV=2			0	65.45	QVLIASHLPSYELR				-0.00492913	1624.89	542.637	1624.89	542.638	3	8	2.1.1.3098.12	30.2075	627.62	223.57	29.31	0.87	1436.25
2	128.04	128.03	56.96	33.03	31.1	tr|F1QM37|F1QM37_DANRE	Acetyl-CoA carboxylase beta OS=Danio rerio OX=7955 GN=acacb PE=1 SV=2			0	37.43	QVLIASHLPSYELR				-0.00085307	1624.89	542.638	1624.89	542.638	3	7	1.1.1.3070.8	29.7116	1624.65	574.85	29.18	0.58	2078.89
2	128.04	128.03	56.96	33.03	31.1	tr|F1QM37|F1QM37_DANRE	Acetyl-CoA carboxylase beta OS=Danio rerio OX=7955 GN=acacb PE=1 SV=2			0	23.3	QVLIASHLPSYELR				-0.00085307	1624.89	542.638	1624.89	542.638	3	7	1.1.1.3056.9	28.9043	1624.65	681.54	29.18	0.58	2031.81
2	128.04	128.03	56.96	33.03	31.1	tr|F1QM37|F1QM37_DANRE	Acetyl-CoA carboxylase beta OS=Danio rerio OX=7955 GN=acacb PE=1 SV=2			0	99	QVQAEVPGSPIFIMQLAEHAR				-0.00567096	2320.19	774.405	2320.2	774.407	3	27	1.1.1.3324.6	44.4141	884.32	827.25	44.56	1.21	3840.41
2	128.04	128.03	56.96	33.03	31.1	tr|F1QM37|F1QM37_DANRE	Acetyl-CoA carboxylase beta OS=Danio rerio OX=7955 GN=acacb PE=1 SV=2			0	99	QVQAEVPGSPIFIMQLAEHAR				-0.00567096	2320.19	774.405	2320.2	774.407	3	27	1.1.1.3326.5	44.5277	884.32	871.11	44.56	1.21	4214.28
2	128.04	128.03	56.96	33.03	31.1	tr|F1QM37|F1QM37_DANRE	Acetyl-CoA carboxylase beta OS=Danio rerio OX=7955 GN=acacb PE=1 SV=2			0	99	QVQAEVPGSPIFIMQLAEHAR				-0.00567096	2320.19	774.405	2320.2	774.407	3	27	1.1.1.3328.4	44.6448	884.32	790.73	44.56	1.21	3491.01
2	128.04	128.03	56.96	33.03	31.1	tr|F1QM37|F1QM37_DANRE	Acetyl-CoA carboxylase beta OS=Danio rerio OX=7955 GN=acacb PE=1 SV=2			0	99	QVQAEVPGSPIFIMQLAEHAR				-0.00567096	2320.19	774.405	2320.2	774.407	3	24	1.1.1.3330.7	44.7651	884.32	557.27	44.56	1.21	3752.38
2	128.04	128.03	56.96	33.03	31.1	tr|F1QM37|F1QM37_DANRE	Acetyl-CoA carboxylase beta OS=Danio rerio OX=7955 GN=acacb PE=1 SV=2			0	99	QVQAEVPGSPIFIMQLAEHAR				-0.00567096	2320.19	774.405	2320.2	774.407	3	22	1.1.1.3332.5	44.8834	884.32	496.81	44.56	1.21	3692
2	128.04	128.03	56.96	33.03	31.1	tr|F1QM37|F1QM37_DANRE	Acetyl-CoA carboxylase beta OS=Danio rerio OX=7955 GN=acacb PE=1 SV=2			0	99	QVQAEVPGSPIFIMQLAEHAR				-0.00567096	2320.19	774.405	2320.2	774.407	3	23	1.1.1.3339.5	45.2867	884.32	345.02	44.56	1.21	4100.26
2	128.04	128.03	56.96	33.03	31.1	tr|F1QM37|F1QM37_DANRE	Acetyl-CoA carboxylase beta OS=Danio rerio OX=7955 GN=acacb PE=1 SV=2			0	99	QVQAEVPGSPIFIMQLAEHAR				-0.00567096	2320.19	774.405	2320.2	774.407	3	20	1.1.1.3350.4	45.938	884.32	259.34	44.56	1.21	2998.1
2	128.04	128.03	56.96	33.03	31.1	tr|F1QM37|F1QM37_DANRE	Acetyl-CoA carboxylase beta OS=Danio rerio OX=7955 GN=acacb PE=1 SV=2			0	99	QVQAEVPGSPIFIMQLAEHAR				-0.0128583	2320.19	774.403	2320.2	774.407	3	19	2.1.1.3343.3	44.3539	401.75	384.52	44.44	1.32	2187.26
2	128.04	128.03	56.96	33.03	31.1	tr|F1QM37|F1QM37_DANRE	Acetyl-CoA carboxylase beta OS=Danio rerio OX=7955 GN=acacb PE=1 SV=2			0	99	QVQAEVPGSPIFIMQLAEHAR				-0.0128583	2320.19	774.403	2320.2	774.407	3	19	2.1.1.3351.5	44.839	401.75	285.1	44.44	1.32	1536.7
2	128.04	128.03	56.96	33.03	31.1	tr|F1QM37|F1QM37_DANRE	Acetyl-CoA carboxylase beta OS=Danio rerio OX=7955 GN=acacb PE=1 SV=2			0	99	QVQAEVPGSPIFIMQLAEHAR				-0.0128583	2320.19	774.403	2320.2	774.407	3	20	2.1.1.3354.5	45.0005	401.75	246.41	44.44	1.32	1890.44
2	128.04	128.03	56.96	33.03	31.1	tr|F1QM37|F1QM37_DANRE	Acetyl-CoA carboxylase beta OS=Danio rerio OX=7955 GN=acacb PE=1 SV=2			0	91.05	RIDPVYSR			missed R-I@1	-0.00256118	1004.54	503.276	1004.54	503.277	2	7	1.1.1.2836.14	16.2403	818.75	773.14	16.28	0.74	3997.11
2	128.04	128.03	56.96	33.03	31.1	tr|F1QM37|F1QM37_DANRE	Acetyl-CoA carboxylase beta OS=Danio rerio OX=7955 GN=acacb PE=1 SV=2			0	60.33	RIDPVYSR			missed R-I@1	-0.00224236	1004.54	503.276	1004.54	503.277	2	7	2.1.1.2862.8	16.6041	251.3	245.07	16.52	0.97	1784.71
[truncated: 80,994 more rows]

## Sheet: Control
N	Unused	Total	%Cov	%Cov(50)	%Cov(95)	Accessions	Names	Used	Annotation	Contrib	Conf	Sequence	Modifications	ProteinModifications	Cleavages	dMass	Obs MW	Obs m/z	Theor MW	Theor m/z	Theor z	Sc	Spectrum	Acq Time	Intensity (Peptide)	PrecursorIntensityAcquisition	Apex Time (Peptide)	Elution Peak Width (Peptide)	MS2Counts
[truncated: 94,230 more rows]
