# Supplementary material for: In vivo proteomic mapping through GFP-directed proximity-dependent biotin labelling in zebrafish
Source: eLife. 2021 Feb 16;10:e64631. doi: 10.7554/eLife.64631 (PMC7906605; doi:10.7554/eLife.64631)
Supplement: Supplementary file 3. [file elife-64631-supp3.xlsx]

## Sheet: TurboID Control
The list below are proteins identified in zebrafish embryos expressing only TurboID-dGBP
Group	Unused	Total	%Cov	%Cov(50)	%Cov(95)	Accession	Name	Species	Peptides(95%)	MS2Count
1	134.1	134.1	68.84	67.23	61.9	tr|A0A0R4IFJ4|A0A0R4IFJ4_DANRE	Pyruvate carboxylase OS=Danio rerio OX=7955 GN=pcxa PE=1 SV=1	DANRE	202	7.42235e+07
2	127.99	127.99	58.08	55.73	51.1	tr|Q1LWN2|Q1LWN2_DANRE	Vitellogenin 1 OS=Danio rerio OX=7955 GN=vtg1 PE=1 SV=1	DANRE	129	2.3305e+07
3	103.94	103.94	35.29	32.19	29.04	tr|F1QM37|F1QM37_DANRE	Acetyl-CoA carboxylase beta OS=Danio rerio OX=7955 GN=acacb PE=1 SV=2	DANRE	65	2.00883e+06
4	76.48	76.48	73.91	72.07	64.88	tr|Q6DGE2|Q6DGE2_DANRE	Propionyl-Coenzyme A carboxylase, alpha polypeptide OS=Danio rerio OX=7955 GN=pcca PE=2 SV=1	DANRE	125	3.92536e+07
5	70.66	129.13	71.63	68.59	62.91	tr|B3DGZ9|B3DGZ9_DANRE	Pyruvate carboxylase OS=Danio rerio OX=7955 GN=pcxb PE=2 SV=1	DANRE	176	6.29136e+07
6	51.33	70.4	36.6	32.25	29.86	tr|Q1MTC4|Q1MTC4_DANRE	Vitellogenin 2 OS=Danio rerio OX=7955 GN=vtg2 PE=1 SV=1	DANRE	64	6.46361e+06
7	44.28	114.79	55.1	52.16	47.47	tr|F1Q7L0|F1Q7L0_DANRE	Vitellogenin 4 (Fragment) OS=Danio rerio OX=7955 GN=vtg4 PE=1 SV=1	DANRE	119	1.86775e+07
8	41.44	43.59	52.46	51.9	49.09	tr|B7ZV91|B7ZV91_DANRE	LOC792190 protein OS=Danio rerio OX=7955 GN=mccc1 PE=2 SV=1	DANRE	56	8.33647e+06
9	35.95	35.95	26.28	21.12	14.97	tr|B8A568|B8A568_DANRE	Myosin, heavy polypeptide 1.1, skeletal muscle OS=Danio rerio OX=7955 GN=myhz1.1 PE=1 SV=1	DANRE	24	320967
10	24.19	24.19	18.46	15.59	15.59	tr|Q9PUB5|Q9PUB5_DANRE	Type II cytokeratin OS=Danio rerio OX=7955 GN=krt5 PE=2 SV=1	DANRE	23	4.67848e+06
11	23.91	112.4	55.25	52.02	45.78	tr|F1R2S5|F1R2S5_DANRE	Vitellogenin 5 (Fragment) OS=Danio rerio OX=7955 GN=vtg5 PE=1 SV=1	DANRE	123	2.09917e+07
12	23.67	23.78	42.91	37.88	30.16	tr|Q6NWC8|Q6NWC8_DANRE	Propionyl Coenzyme A carboxylase, beta polypeptide OS=Danio rerio OX=7955 GN=pccb PE=2 SV=1	DANRE	15	323250
13	20.56	20.56	33.87	30.48	26.56	tr|F1QGN5|F1QGN5_DANRE	Guanine nucleotide-binding protein-like 3 OS=Danio rerio OX=7955 GN=gnl3 PE=1 SV=1	DANRE	16	473898
14	20.47	20.48	30.18	30.18	26.13	tr|X1WCD4|X1WCD4_DANRE	Si:dkey-108k21.21 (Fragment) OS=Danio rerio OX=7955 GN=si:dkey-108k21.21 PE=3 SV=1	DANRE	15	1.00582e+07
15	19.73	19.88	40.69	36.44	31.38	tr|Q3B727|Q3B727_DANRE	Zgc:123289 OS=Danio rerio OX=7955 GN=zgc:123289 PE=2 SV=1	DANRE	14	898545
16	16.69	16.69	35.16	26.74	22.71	tr|Q7ZU96|Q7ZU96_DANRE	Cct8 protein OS=Danio rerio OX=7955 GN=cct8 PE=1 SV=1	DANRE	11	358520
17	16.2	16.25	33.2	30.57	28.95	tr|Q6TEL4|Q6TEL4_DANRE	Nucleolar protein 5A OS=Danio rerio OX=7955 GN=nop56 PE=2 SV=1	DANRE	11	195692
18	14.81	14.81	14.03	9.383	9.383	tr|B7ZUU8|B7ZUU8_DANRE	Adaptor-related protein complex 3 subunit delta 1 OS=Danio rerio OX=7955 GN=ap3d1 PE=1 SV=1	DANRE	8	64357.1
19	12.59	12.59	17.83	17.83	15.61	tr|E7F9D9|E7F9D9_DANRE	Si:ch73-308l14.2 OS=Danio rerio OX=7955 GN=si:ch73-308l14.2 PE=1 SV=2	DANRE	6	52806.9
20	12.49	12.5	19.35	13.56	11.45	tr|F1QZ50|F1QZ50_DANRE	AHNAK nucleoprotein OS=Danio rerio OX=7955 GN=ahnak PE=1 SV=2	DANRE	9	318726
21	12.12	12.13	19.47	19.47	16.8	tr|Q7ZW95|Q7ZW95_DANRE	Ribosomal protein L4 OS=Danio rerio OX=7955 GN=rpl4 PE=1 SV=1	DANRE	6	143124
22	11.73	11.75	16.99	13.45	7.412	tr|Q6NV15|Q6NV15_DANRE	ATP-binding cassette, sub-family F (GCN20), member 1 OS=Danio rerio OX=7955 GN=abcf1 PE=2 SV=1	DANRE	5	133817
23	11.64	11.67	13.88	11.87	9.457	tr|Q642Z0|Q642Z0_DANRE	Calcium-transporting ATPase OS=Danio rerio OX=7955 GN=atp2a1 PE=1 SV=1	DANRE	8	57495.6
24	10.62	10.64	20.32	19.13	12.01	tr|Q1ED17|Q1ED17_DANRE	DNA topoisomerase I OS=Danio rerio OX=7955 GN=top1l PE=1 SV=1	DANRE	7	156402
25	10	10.41	48.25	48.25	40.35	tr|E7F225|E7F225_DANRE	Zgc:163061 OS=Danio rerio OX=7955 GN=zgc:163061 PE=1 SV=1	DANRE	6	928660
26	9.96	12.43	27.36	26.87	21.89	tr|Q568D0|Q568D0_DANRE	Zgc:110380 OS=Danio rerio OX=7955 GN=histh1l PE=2 SV=1	DANRE	9	5.56083e+06
27	9.03	9.14	59.62	44.71	35.58	sp|P62247|RS8_DANRE	40S ribosomal protein S8 OS=Danio rerio OX=7955 GN=rps8 PE=2 SV=2	DANRE	8	1.30343e+06
28	8.74	8.83	11.47	9.957	9.957	tr|Q1RLR3|Q1RLR3_DANRE	Keratin 93 OS=Danio rerio OX=7955 GN=krt93 PE=2 SV=1	DANRE	7	4.29997e+06
29	8.48	27.52	14.56	9.778	8.561	tr|F6P055|F6P055_DANRE	Acetyl-CoA carboxylase alpha OS=Danio rerio OX=7955 GN=acaca PE=1 SV=1	DANRE	20	673911
30	8.17	8.19	14.26	11.75	9.441	tr|Q803P5|Q803P5_DANRE	Nop58 protein (Fragment) OS=Danio rerio OX=7955 GN=nop58 PE=2 SV=1	DANRE	5	75778.1
31	6.49	6.49	23.37	18.11	16.42	tr|B8A4H3|B8A4H3_DANRE	Lysine-rich nucleolar protein 1 OS=Danio rerio OX=7955 GN=knop1 PE=4 SV=1	DANRE	7	58677.3
32	6.4	93.02	48.9	46.76	40.28	tr|F1R2T3|F1R2T3_DANRE	Vitellogenin 7 OS=Danio rerio OX=7955 GN=vtg7 PE=1 SV=1	DANRE	103	1.69376e+07
33	6.25	6.26	22.61	22.61	15.08	tr|Q6NYV3|Q6NYV3_DANRE	H1 histone family, member 0 OS=Danio rerio OX=7955 GN=h1f0 PE=1 SV=1	DANRE	4	2.10397e+06
34	6.21	16.72	40.49	36.2	30.67	tr|Q6DH38|Q6DH38_DANRE	Zgc:110216 protein (Fragment) OS=Danio rerio OX=7955 GN=zgc:110216 PE=2 SV=1	DANRE	12	1.05939e+07
35	6.16	6.18	25.56	18.8	13.53	tr|A0A2R8RI07|A0A2R8RI07_DANRE	60S ribosomal protein L36a OS=Danio rerio OX=7955 GN=rpl36a PE=1 SV=1	DANRE	4	1.68937e+06
36	6	109.47	53.65	49.93	44.08	tr|F1QV15|F1QV15_DANRE	Vitellogenin 6 (Fragment) OS=Danio rerio OX=7955 GN=vtg6 PE=1 SV=1	DANRE	116	2.18365e+07
37	6	19.72	47.48	43.24	31.3	tr|Q9I8V1|Q9I8V1_DANRE	Actin alpha cardiac muscle 1b OS=Danio rerio OX=7955 GN=actc1b PE=2 SV=1	DANRE	15	1.01819e+06
38	5.73	5.92	3.618	2.886	2.886	tr|A0A0R4IVN8|A0A0R4IVN8_DANRE	Bromodomain adjacent to zinc finger domain, 2A OS=Danio rerio OX=7955 GN=baz2a PE=1 SV=1	DANRE	4	6268.98
39	5.63	5.83	37.37	31.14	15.22	tr|Q7ZW23|Q7ZW23_DANRE	Thioredoxin-like 1 OS=Danio rerio OX=7955 GN=txnl1 PE=2 SV=1	DANRE	3	107368
40	5.28	5.5	24.81	17.12	9.181	tr|Q5BJJ2|Q5BJJ2_DANRE	Ribosomal protein L3 OS=Danio rerio OX=7955 GN=rpl3 PE=1 SV=1	DANRE	3	213258
41	4.8	4.91	10.18	6.845	5.342	tr|E7FAZ5|E7FAZ5_DANRE	Heterochromatin protein 1,-binding protein 3 OS=Danio rerio OX=7955 GN=hp1bp3 PE=1 SV=2	DANRE	3	34612.7
42	4.71	11.36	29.95	29.95	24.87	tr|A0A140LH34|A0A140LH34_DANRE	Si:ch1073-159d7.7 OS=Danio rerio OX=7955 GN=si:ch1073-159d7.7 PE=3 SV=1	DANRE	8	6.83197e+06
43	4.04	4.04	4.348	1.976	1.976	tr|F1QB47|F1QB47_DANRE	Eukaryotic translation initiation factor 5B OS=Danio rerio OX=7955 GN=eif5b PE=1 SV=3	DANRE	2	11520.7
44	4	10	25.13	23.08	23.08	tr|F1R314|F1R314_DANRE	Zgc:110425 OS=Danio rerio OX=7955 GN=zgc:110425 PE=1 SV=1	DANRE	9	6.00645e+06
45	3.92	4.04	16.97	14.14	10.54	tr|Q6DBQ9|Q6DBQ9_DANRE	Zgc:91999 OS=Danio rerio OX=7955 GN=zgc:91999 PE=2 SV=1	DANRE	3	25954.3
46	2.62	2.63	12.55	8.658	4.978	tr|Q4KMK1|Q4KMK1_DANRE	Elongation factor 1-alpha OS=Danio rerio OX=7955 GN=eef1a1l2 PE=2 SV=1	DANRE	2	90891.2
47	2.39	2.39	38.06	27.1	8.387	tr|F1QGI3|F1QGI3_DANRE	Ribosomal protein L23a OS=Danio rerio OX=7955 GN=rpl23a PE=1 SV=1	DANRE	1	70159.9
48	2.19	2.2	16.98	11.7	2.642	tr|Q567N5|Q567N5_DANRE	Ribosomal protein L6 OS=Danio rerio OX=7955 GN=rpl6 PE=1 SV=1	DANRE	1	50890.7
49	2.07	10.55	28.64	28.14	23.12	tr|E7F5A4|E7F5A4_DANRE	Si:dkey-261m9.12 OS=Danio rerio OX=7955 GN=si:dkey-261m9.12 PE=1 SV=1	DANRE	8	7.01341e+06
50	2.03	2.1	32.8	23.2	23.2	tr|X1WH60|X1WH60_DANRE	Histone H2B (Fragment) OS=Danio rerio OX=7955 GN=si:dkey-108k21.11 PE=3 SV=1	DANRE	3	91326.2
51	2.02	2.02	6.711	6.711	6.711	tr|E9QGU6|E9QGU6_DANRE	Synaptotagmin-like 5 (Fragment) OS=Danio rerio OX=7955 GN=sytl5 PE=4 SV=1	DANRE	1	1.28699e+06
52	2.01	2.02	5.525	3.039	3.039	tr|Q7T3A6|Q7T3A6_DANRE	Surf6l protein OS=Danio rerio OX=7955 GN=surf6 PE=2 SV=1	DANRE	1	4072.07
53	2.01	2.01	19.61	19.61	19.61	tr|Q6IMW8|Q6IMW8_DANRE	Ribosomal protein L39 OS=Danio rerio OX=7955 GN=rpl39 PE=1 SV=1	DANRE	8	2.34339e+06
54	2.01	2.01	13.23	4.28	4.28	sp|Q6P0V6|RL8_DANRE	60S ribosomal protein L8 OS=Danio rerio OX=7955 GN=rpl8 PE=2 SV=3	DANRE	1	13138.3
55	2	43.59	52.46	51.9	49.09	tr|A0A2R8QGK7|A0A2R8QGK7_DANRE	Methylcrotonoyl-CoA carboxylase 1 (alpha) OS=Danio rerio OX=7955 GN=mccc1 PE=1 SV=1	DANRE	58	8.39867e+06
56	2	20.48	31.86	31.86	27.45	tr|E7FAU1|E7FAU1_DANRE	Si:dkey-108k21.14 OS=Danio rerio OX=7955 GN=si:dkey-108k21.14 PE=1 SV=1	DANRE	15	9.86547e+06
57	2	19.88	40.8	36.53	31.47	tr|A8WG05|A8WG05_DANRE	Bactin2 protein OS=Danio rerio OX=7955 GN=actb2 PE=2 SV=1	DANRE	12	814211
58	2	18.72	32.84	31.86	27.45	tr|E9QFU6|E9QFU6_DANRE	Si:ch73-36p18.1 OS=Danio rerio OX=7955 GN=si:ch73-36p18.1 PE=3 SV=2	DANRE	15	9.77277e+06
59	2	2.01	1.656	1.046	1.046	tr|F1Q5P6|F1Q5P6_DANRE	Replication factor C subunit 1 OS=Danio rerio OX=7955 GN=rpl9 PE=3 SV=1	DANRE	1	48357.2
60	2	2	8.271	8.271	7.519	tr|Q6PC01|Q6PC01_DANRE	40S ribosomal protein S30 OS=Danio rerio OX=7955 GN=faua PE=2 SV=1	DANRE	1	404244
61	2	2	1.21	1.21	1.21	tr|F1R480|F1R480_DANRE	Si:ch73-74h11.1 OS=Danio rerio OX=7955 GN=si:ch73-74h11.1 PE=4 SV=2	DANRE	1	1012.56
62	2	2	0.7813	0.7813	0.7813	tr|A0A0R4IP12|A0A0R4IP12_DANRE	PDS5 cohesin-associated factor B OS=Danio rerio OX=7955 GN=pds5b PE=1 SV=1	DANRE	1	20325.1
63	2	2	0.9302	0.9302	0.9302	tr|A0A0H3DSR5|A0A0H3DSR5_EDWTF	Leucine--tRNA ligase OS=Edwardsiella tarda (strain FL6-60) OX=718251 GN=leuS PE=3 SV=1	EDWTF	1	5616.51
64	1.77	43.59	52.46	51.9	49.09	tr|A0JMP7|A0JMP7_DANRE	Zgc:154106 OS=Danio rerio OX=7955 GN=mccc1 PE=2 SV=1	DANRE	55	8.31389e+06
65	1.6	1.72	1.76	1.76	1.76	tr|Q7ZYY3|Q7ZYY3_DANRE	Heat shock protein 9 OS=Danio rerio OX=7955 GN=hspa9 PE=2 SV=1	DANRE	1	523.82
66	1.57	1.68	2.033	1.479	1.479	tr|F1R3X8|F1R3X8_DANRE	Calcium channel, voltage-dependent, alpha2/delta subunit 3 OS=Danio rerio OX=7955 GN=cacna2d3 PE=4 SV=2	DANRE	1	11347.9
67	1.53	1.65	15.79	5.263	5.263	tr|Q6PBZ1|Q6PBZ1_DANRE	Ribosomal protein L7a OS=Danio rerio OX=7955 GN=rpl7a PE=1 SV=1	DANRE	3	35329.4
68	1.16	1.29	12.86	6.208	3.991	tr|Q8AWD6|Q8AWD6_DANRE	Tubulin alpha chain OS=Danio rerio OX=7955 GN=tuba1c PE=2 SV=1	DANRE	1	5327.67
69	1.15	1.28	6.809	6.809	6.809	RRRRRtr|Q5QJR2|Q5QJR2_DANRE	REVERSED Oligodendrocyte transcription factor 1 OS=Danio rerio OX=7955 GN=olig1 PE=4 SV=1	DANRE	1	2800.56
70	1.01	1.12	4.156	4.156	4.156	RRRRRtr|Q0P4B8|Q0P4B8_DANRE	REVERSED Zgc:153172 OS=Danio rerio OX=7955 GN=mrps9 PE=2 SV=1	DANRE	1	390554
